# Supplementary material for: Study on the Electrical Injection Regeneration of Industrialized B-Doped Czochralski Silicon PERC Solar Cells
Source: Hindawi journal article supplement (doi:10.1155/2019/5357370), 2019-06-20
Supplement: f1 [file 5357370.f1.zip]

Archive with 378 entries (375 files):
- section3.3/IVMeasurementData.csv
- section3.3/IVRawData_000.csv
- section3.3/IVRawData_3-12-10h.csv
- section3.3/IVRawData_3-12-11h.csv
- section3.3/IVRawData_3-12-12h.csv
- section3.3/IVRawData_3-12-2.5h.csv
- section3.3/IVRawData_3-12-2h.csv
- section3.3/IVRawData_3-12-3h.csv
- section3.3/IVRawData_3-12-4h.csv
- section3.3/IVRawData_3-12-5h.csv
- section3.3/IVRawData_3-12-6h.csv
- section3.3/IVRawData_3-12-7h.csv
- section3.3/IVRawData_3-12-8h.csv
- section3.3/IVRawData_3-12-9h.csv
- section3.3/IVRawData_3-14-10h.csv
- section3.3/IVRawData_3-14-11h.csv
- section3.3/IVRawData_3-14-12h.csv
- section3.3/IVRawData_3-14-2.5h.csv
- section3.3/IVRawData_3-14-3h.csv
- section3.3/IVRawData_3-14-4h.csv
- section3.3/IVRawData_3-14-5h.csv
- section3.3/IVRawData_3-14-6h.csv
- section3.3/IVRawData_3-14-7h.csv
- section3.3/IVRawData_3-14-8h.csv
- section3.3/IVRawData_3-14-9h.csv
- section3.3/IVRawData_3-16-10h.csv
- section3.3/IVRawData_3-16-11h.csv
- section3.3/IVRawData_3-16-12h.csv
- section3.3/IVRawData_3-16-4h.csv
- section3.3/IVRawData_3-16-5h.csv
- section3.3/IVRawData_3-16-6h.csv
- section3.3/IVRawData_3-16-7h.csv
- section3.3/IVRawData_3-16-8h.csv
- section3.3/IVRawData_3-16-9h.csv
- section3.3/IVRawData_3-18-10h.csv
- section3.3/IVRawData_3-18-11h.csv
- section3.3/IVRawData_3-18-12h.csv
- section3.3/IVRawData_3-18-4h.csv
- section3.3/IVRawData_3-18-5h.csv
- section3.3/IVRawData_3-18-6h.csv
- section3.3/IVRawData_3-18-7h.csv
- section3.3/IVRawData_3-18-8h.csv
- section3.3/IVRawData_3-18-9h.csv
- section3.3/IVRawData_3-6-1.5h.csv
- section3.3/IVRawData_3-6-10h.csv
- section3.3/IVRawData_3-6-11h.csv
- section3.3/IVRawData_3-6-1h.csv
- section3.3/IVRawData_3-6-2.5h.csv
- section3.3/IVRawData_3-6-2h.csv
- section3.3/IVRawData_3-6-3h.csv
- section3.3/IVRawData_3-6-4h.csv
- section3.3/IVRawData_3-6-5h.csv
- section3.3/IVRawData_3-6-6h.csv
- section3.3/IVRawData_3-6-7h.csv
- section3.3/IVRawData_3-6-8h.csv
- section3.3/IVRawData_3-6-9h.csv
- section3.3/IVRawData_3-8-1.5h.csv
- section3.3/IVRawData_3-8-10h.csv
- section3.3/IVRawData_3-8-11h.csv
- section3.3/IVRawData_3-8-12h.csv
- section3.3/IVRawData_3-8-2.5.csv
- section3.3/IVRawData_3-8-2.5h.csv
- section3.3/IVRawData_3-8-2h.csv
- section3.3/IVRawData_3-8-3h.csv
- section3.3/IVRawData_3-8-4h.csv
- section3.3/IVRawData_3-8-5h.csv
- section3.3/IVRawData_3-8-6h.csv
- section3.3/IVRawData_3-8-7h.csv
- section3.3/IVRawData_3-8-8h.csv
- section3.3/IVRawData_3-8-9h.csv
- section3.3/
- section3.2/IVMeasurementData.csv
- section3.2/IVRawData.csv
- section3.2/IVRawData_0.csv
- section3.2/IVRawData_1-0-1.5h.csv
- section3.2/IVRawData_1-0-10min.csv
- section3.2/IVRawData_1-0-2.5h.csv
- section3.2/IVRawData_1-0-20min.csv
- section3.2/IVRawData_1-0-2H.csv
- section3.2/IVRawData_1-0-30min.csv
- section3.2/IVRawData_1-0-3h.csv
- section3.2/IVRawData_1-0-40min.csv
- section3.2/IVRawData_1-0-4h.csv
- section3.2/IVRawData_1-0-50min.csv
- section3.2/IVRawData_1-0-5h.csv
- section3.2/IVRawData_1-0-60min.csv
- section3.2/IVRawData_1-0-7h.csv
- section3.2/IVRawData_1-0-8h.csv
- section3.2/IVRawData_1-0-after.csv
- section3.2/IVRawData_1-0.csv
- section3.2/IVRawData_1-10-1.5h.csv
- section3.2/IVRawData_1-10-10min.csv
- section3.2/IVRawData_1-10-2.5h.csv
- section3.2/IVRawData_1-10-20min.csv
- section3.2/IVRawData_1-10-2h.csv
- section3.2/IVRawData_1-10-30min.csv
- section3.2/IVRawData_1-10-3h.csv
- section3.2/IVRawData_1-10-40min.csv
- section3.2/IVRawData_1-10-4h.csv
- section3.2/IVRawData_1-10-50min.csv
- section3.2/IVRawData_1-10-60min.csv
- section3.2/IVRawData_1-10-6h.csv
- section3.2/IVRawData_1-10-7h.csv
- section3.2/IVRawData_1-10-8h.csv
- section3.2/IVRawData_1-10-9h.csv
- section3.2/IVRawData_1-10-after.csv
- section3.2/IVRawData_1-10.csv
- section3.2/IVRawData_1-2-1.5h.csv
- section3.2/IVRawData_1-2-10min.csv
- section3.2/IVRawData_1-2-2.5h.csv
- section3.2/IVRawData_1-2-20min.csv
- section3.2/IVRawData_1-2-2h.csv
- section3.2/IVRawData_1-2-30min.csv
- section3.2/IVRawData_1-2-3h.csv
- section3.2/IVRawData_1-2-40min.csv
- section3.2/IVRawData_1-2-4h.csv
- section3.2/IVRawData_1-2-50min.csv
- section3.2/IVRawData_1-2-5h.csv
- section3.2/IVRawData_1-2-60min.csv
- section3.2/IVRawData_1-2-6h.csv
- section3.2/IVRawData_1-2-8h.csv
- section3.2/IVRawData_1-2-9h.csv
- section3.2/IVRawData_1-2-after.csv
- section3.2/IVRawData_1-2.csv
- section3.2/IVRawData_1-20-1.5h.csv
- section3.2/IVRawData_1-20-10min.csv
- section3.2/IVRawData_1-20-2-after.csv
- section3.2/IVRawData_1-20-2.5h.csv
- section3.2/IVRawData_1-20-20min.csv
- section3.2/IVRawData_1-20-30min.csv
- section3.2/IVRawData_1-20-3h.csv
- section3.2/IVRawData_1-20-40min.csv
- section3.2/IVRawData_1-20-4h.csv
- section3.2/IVRawData_1-20-50min.csv
- section3.2/IVRawData_1-20-5h.csv
- section3.2/IVRawData_1-20-60min.csv
- section3.2/IVRawData_1-20-6h.csv
- section3.2/IVRawData_1-20-7h.csv
- section3.2/IVRawData_1-20-after.csv
- section3.2/IVRawData_1-20.csv
- section3.2/IVRawData_1-30-1.5h.csv
- section3.2/IVRawData_1-30-10min.csv
- section3.2/IVRawData_1-30-2.5h.csv
- section3.2/IVRawData_1-30-20min.csv
- section3.2/IVRawData_1-30-2h.csv
- section3.2/IVRawData_1-30-30min.csv
- section3.2/IVRawData_1-30-3h.csv
- section3.2/IVRawData_1-30-40min.csv
- section3.2/IVRawData_1-30-4h.csv
- section3.2/IVRawData_1-30-50min.csv
- section3.2/IVRawData_1-30-5h.csv
- section3.2/IVRawData_1-30-60min.csv
- section3.2/IVRawData_1-30-6h.csv
- section3.2/IVRawData_1-30-7h.csv
- section3.2/IVRawData_1-30-8h.csv
- section3.2/IVRawData_1-30-after.csv
- section3.2/IVRawData_1-30.csv
- section3.2/IVRawData_1-5-1.5h.csv
- section3.2/IVRawData_1-5-10min.csv
- section3.2/IVRawData_1-5-2.5h.csv
- section3.2/IVRawData_1-5-20min.csv
- section3.2/IVRawData_1-5-2h.csv
- section3.2/IVRawData_1-5-30min.csv
- section3.2/IVRawData_1-5-3h.csv
- section3.2/IVRawData_1-5-40min.csv
- section3.2/IVRawData_1-5-4h.csv
- section3.2/IVRawData_1-5-50min.csv
- section3.2/IVRawData_1-5-5h.csv
- section3.2/IVRawData_1-5-60min.csv
- section3.2/IVRawData_1-5-6h.csv
- section3.2/IVRawData_1-5-7h.csv
- section3.2/IVRawData_1-5-8h.csv
- section3.2/IVRawData_1-5-9h.csv
- section3.2/IVRawData_1-5-after.csv
- section3.2/IVRawData_1-5.csv
- section3.2/
- section3.1/IVMeasurementData.csv
- section3.1/IVRawData_000.csv
- section3.1/IVRawData_1-0-10h.csv
- section3.1/IVRawData_1-0-11h.csv
- section3.1/IVRawData_1-0-12h.csv
- section3.1/IVRawData_1-0-9h.csv
- section3.1/IVRawData_1-10-10h.csv
- section3.1/IVRawData_1-10-11h.csv
- section3.1/IVRawData_1-10-12h.csv
- section3.1/IVRawData_1-2-10h.csv
- section3.1/IVRawData_1-2-11h.csv
- section3.1/IVRawData_1-2-12h.csv
- section3.1/IVRawData_1-20-10h.csv
- section3.1/IVRawData_1-20-11H.csv
- section3.1/IVRawData_1-20-12H.csv
- section3.1/IVRawData_1-20-2-1.5h.csv
- section3.1/IVRawData_1-20-2-10min.csv
- section3.1/IVRawData_1-20-2-1h.csv
- section3.1/IVRawData_1-20-2-20min.csv
- section3.1/IVRawData_1-20-2-2h.csv
- section3.1/IVRawData_1-20-2-30min.csv
- section3.1/IVRawData_1-20-2-3h.csv
- section3.1/IVRawData_1-20-2-40min.csv
- section3.1/IVRawData_1-20-2-4h.csv
- section3.1/IVRawData_1-20-2-50min.csv
- section3.1/IVRawData_1-20-2-6h.csv
- section3.1/IVRawData_1-20-2-7h.csv
- section3.1/IVRawData_1-20-2-8h.csv
- section3.1/IVRawData_1-20-2-9h.csv
- section3.1/IVRawData_1-220-2h.csv
- section3.1/IVRawData_1-30-10h.csv
- section3.1/IVRawData_1-30-11h.csv
- section3.1/IVRawData_1-30-12h.csv
- section3.1/IVRawData_1-30-2-5h.csv
- section3.1/IVRawData_1-30-9h.csv
- section3.1/IVRawData_1-5-10h.csv
- section3.1/IVRawData_1-5-11h.csv
- section3.1/IVRawData_1-5-12h.csv
- section3.1/IVRawData_2-160-10H.csv
- section3.1/IVRawData_2-160-11H.csv
- section3.1/IVRawData_2-160-12H.csv
- section3.1/IVRawData_2-160-4h.csv
- section3.1/IVRawData_2-160-8H.csv
- section3.1/IVRawData_2-160-9H.csv
- section3.1/IVRawData_2-160C-10min.csv
- section3.1/IVRawData_2-160C-1h.csv
- section3.1/IVRawData_2-160C-1h30min.csv
- section3.1/IVRawData_2-160C-2.5h.csv
- section3.1/IVRawData_2-160C-20min.csv
- section3.1/IVRawData_2-160C-2h.csv
- section3.1/IVRawData_2-160C-30min.csv
- section3.1/IVRawData_2-160C-3h.csv
- section3.1/IVRawData_2-160C-40min.csv
- section3.1/IVRawData_2-160C-50min.csv
- section3.1/IVRawData_2-160C-5h.csv
- section3.1/IVRawData_2-160C-6H.csv
- section3.1/IVRawData_2-160C-7H.csv
- section3.1/IVRawData_2-160C-After.csv
- section3.1/IVRawData_2-160C-before.csv
- section3.1/IVRawData_2-200-10H.csv
- section3.1/IVRawData_2-200-11H.csv
- section3.1/IVRawData_2-200-12H.csv
- section3.1/IVRawData_2-200-3h.csv
- section3.1/IVRawData_2-200-7H.csv
- section3.1/IVRawData_2-200-8H.csv
- section3.1/IVRawData_2-200-9H.csv
- section3.1/IVRawData_2-200C-1.5h.csv
- section3.1/IVRawData_2-200C-10min.csv
- section3.1/IVRawData_2-200C-1h.csv
- section3.1/IVRawData_2-200C-2.5h.csv
- section3.1/IVRawData_2-200C-20min.csv
- section3.1/IVRawData_2-200C-2h.csv
- section3.1/IVRawData_2-200C-30.csv
- section3.1/IVRawData_2-200C-30min.csv
- section3.1/IVRawData_2-200C-40min.csv
- section3.1/IVRawData_2-200C-4h.csv
- section3.1/IVRawData_2-200C-50min.csv
- section3.1/IVRawData_2-200C-5H.csv
- section3.1/IVRawData_2-200C-6H.csv
- section3.1/IVRawData_2-200C-After.csv
- section3.1/IVRawData_2-200C-before.csv
- section3.1/IVRawData_2-220-10H.csv
- section3.1/IVRawData_2-220-11H.csv
- section3.1/IVRawData_2-220-12H.csv
- section3.1/IVRawData_2-220-2.5h.csv
- section3.1/IVRawData_2-220-6H.csv
- section3.1/IVRawData_2-220-7H.csv
- section3.1/IVRawData_2-220-8H.csv
- section3.1/IVRawData_2-220-9H.csv
- section3.1/IVRawData_2-220C-1.5h.csv
- section3.1/IVRawData_2-220C-10min.csv
- section3.1/IVRawData_2-220C-1h.csv
- section3.1/IVRawData_2-220C-20min.csv
- section3.1/IVRawData_2-220C-30min.csv
- section3.1/IVRawData_2-220C-3h.csv
- section3.1/IVRawData_2-220C-40min.csv
- section3.1/IVRawData_2-220C-4H.csv
- section3.1/IVRawData_2-220C-50min.csv
- section3.1/IVRawData_2-220C-5H.csv
- section3.1/IVRawData_2-220C-After.csv
- section3.1/IVRawData_2-220C-before.csv
- section3.1/IVRawData_2-240-1.5h.csv
- section3.1/IVRawData_2-240-10H.csv
- section3.1/IVRawData_2-240-11H.csv
- section3.1/IVRawData_2-240-12h.csv
- section3.1/IVRawData_2-240-2h.csv
- section3.1/IVRawData_2-240-5H.csv
- section3.1/IVRawData_2-240-6H.csv
- section3.1/IVRawData_2-240-7H.csv
- section3.1/IVRawData_2-240-8H.csv
- section3.1/IVRawData_2-240-9H.csv
- section3.1/IVRawData_2-240C-10min.csv
- section3.1/IVRawData_2-240C-1h.csv
- section3.1/IVRawData_2-240C-2.5h.csv
- section3.1/IVRawData_2-240C-20min.csv
- section3.1/IVRawData_2-240C-30min.csv
- section3.1/IVRawData_2-240C-3h.csv
- section3.1/IVRawData_2-240C-40min.csv
- section3.1/IVRawData_2-240C-4H.csv
- section3.1/IVRawData_2-240C-50min.csv
- section3.1/IVRawData_2-240C-after.csv
- section3.1/IVRawData_2-240C-before.csv
- section3.1/IVRawData_2-260-10H.csv
- section3.1/IVRawData_2-260-11h.csv
[truncated: 78 more entries]
