# Supplementary material for: Study on the Electrical Injection Regeneration of Industrialized B-Doped Czochralski Silicon PERC Solar Cells
Source: Hindawi journal article supplement (doi:10.1155/2019/5357370), 2019-06-20
Supplement: f1 [file 5357370.f1.zip › section3.1/IVMeasurementData.csv]

[DateTime]	[Grade]	[CellName]	[Order]	[Area (cm2)]	[Isc (A)]	[Jsc (mA/cm2)]	[Voc (V)]	[FF (%)]	[Eff (%)]	[Pmpp (W)]	[Rss (ohm)]	[Rshs (ohm)]	[Vmpp (V)]	[Impp (A)]	[Jmpp (mA/cm2)]	[IVLV1 (A)]	[IVLV2 (A)]	[Irradiance (W/m2)]	[Temp (deg C)]	[Rsh (ohm)]	[IVRV1 (mA)]	[IVRV2 (mA)]	[Rs (ohm)]	TkCurrent (%/K)	TkVoltage (%/K)	TkPower (%/K)	[Compensation]
0:00:49	Light	1-0-9h	1	244.67	8.63721	35.3	0.6334	80.79%	18.06%	4.4197	1.5561	100.0877	0.5368	8.2329	33.65	8.6255	8.4888	51	25.05	0	0	0	0	0	0	0	0
0:01:06	Light	1-0-9h	1	244.67	8.62747	35.26	0.6333	80.91%	18.07%	4.4209	1.5463	210.725	0.537	8.2327	33.65	8.6299	8.4854	51	25.08	0	0	0	0	0	0	0	0
0:01:23	Light	1-0-9h	2	244.67	8.62452	35.25	0.6333	80.95%	18.07%	4.4213	1.5414	129.4804	0.5372	8.2306	33.64	8.6448	8.4982	51	25.08	0	0	0	0	0	0	0	0
0:01:40	Light	1-0-9h	3	244.67	8.63266	35.28	0.6333	80.89%	18.07%	4.4223	1.539	179.8712	0.5372	8.2326	33.65	8.6242	8.4955	51	25.09	0	0	0	0	0	0	0	0
0:03:23	Light	1-20-2-10min	1	244.67	9.08925	37.15	0.6708	81.62%	20.34%	4.9765	1.9035	333.0623	0.5727	8.6892	35.51	9.0924	9.0597	51	25.05	0	0	0	0	0	0	0	0
0:03:38	Light	1-20-2-10min	2	244.67	9.08494	37.13	0.6708	81.60%	20.33%	4.9729	1.9158	139.8133	0.5724	8.6886	35.51	9.0946	9.0365	51	25.09	0	0	0	0	0	0	0	0
0:03:53	Light	1-20-2-10min	3	244.67	9.08927	37.15	0.6708	81.61%	20.34%	4.976	1.9084	71.6797	0.5728	8.6878	35.51	9.0792	9.0485	51	25.09	0	0	0	0	0	0	0	0
0:04:15	Light	1-20-2-10min	1	244.67	9.09395	37.17	0.6709	81.58%	20.34%	4.9775	1.9035	24.1133	0.5729	8.6884	35.51	9.0836	9.0469	51	25.05	0	0	0	0	0	0	0	0
0:04:29	Light	1-20-2-10min	1	244.67	9.08819	37.14	0.6708	81.59%	20.33%	4.9737	1.906	122.944	0.5726	8.686	35.5	9.0853	9.0507	51	25.09	0	0	0	0	0	0	0	0
0:16:29	Light	1-20-2-20min	1	244.67	9.08561	37.13	0.6707	81.55%	20.31%	4.9693	1.9109	801.1633	0.5724	8.6815	35.48	9.081	9.0564	51	24.99	0	0	0	0	0	0	0	0
0:16:39	Light	1-20-2-20min	2	244.67	9.07882	37.11	0.6707	81.54%	20.29%	4.965	1.9207	591.0173	0.572	8.6807	35.48	9.0883	9.0565	51	25.08	0	0	0	0	0	0	0	0
0:16:54	Light	1-20-2-20min	3	244.67	9.07924	37.11	0.6706	81.55%	20.29%	4.9652	1.9207	131.918	0.5719	8.682	35.48	9.0843	9.0451	51	25.09	0	0	0	0	0	0	0	0
0:28:14	Light	1-20-2-30min	1	244.67	9.08412	37.13	0.6705	81.48%	20.28%	4.9627	1.928	121.1478	0.5711	8.69	35.52	9.0883	9.0614	51	25.02	0	0	0	0	0	0	0	0
0:28:23	Light	1-20-2-30min	2	244.67	9.08695	37.14	0.6704	81.55%	20.31%	4.9681	1.9133	42253.7668	0.5715	8.6935	35.53	9.0825	9.0568	51	25.09	0	0	0	0	0	0	0	0
0:28:40	Light	1-20-2-30min	3	244.67	9.09961	37.19	0.6705	81.34%	20.28%	4.963	1.9158	146.2219	0.5719	8.6781	35.47	9.0779	9.0424	51	25.09	0	0	0	0	0	0	0	0
0:37:15	Light	1-30-9h	1	244.67	9.04014	36.95	0.667	80.44%	19.82%	4.8502	1.9745	542.5174	0.5657	8.5731	35.04	9.0479	8.9591	51	25.03	0	0	0	0	0	0	0	0
0:37:28	Light	1-30-9h	2	244.67	9.04683	36.98	0.6669	80.43%	19.83%	4.8528	1.9598	1067.9701	0.566	8.5736	35.04	9.0342	8.9556	51	25.1	0	0	0	0	0	0	0	0
0:37:44	Light	1-30-9h	3	244.67	9.03258	36.92	0.667	80.48%	19.82%	4.8487	1.9671	82.8403	0.5658	8.5703	35.03	9.059	8.9606	51	25.1	0	0	0	0	0	0	0	0
0:40:08	Light	1-20-2-40min	1	244.67	9.09698	37.18	0.6704	81.47%	20.31%	4.9685	1.9011	65.7336	0.5717	8.69	35.52	9.0764	9.0698	51	25.03	0	0	0	0	0	0	0	0
0:40:18	Light	1-20-2-40min	2	244.67	9.0845	37.13	0.6703	81.57%	20.30%	4.967	1.8937	554.4988	0.5721	8.6825	35.49	9.0794	9.0447	51	25.09988	0	0	0	0	0	0	0	0
0:40:43	Light	1-20-2-40min	3	244.67	9.0892	37.15	0.6704	81.45%	20.28%	4.9628	1.9084	331.464	0.5716	8.6818	35.48	9.0932	9.0415	51	25.08	0	0	0	0	0	0	0	0
0:49:56	Light	1-10-10h	1	244.67	8.92172	36.46	0.6582	80.19%	19.25%	4.7092	1.906	2503.3239	0.5533	8.5119	34.79	8.9188	8.8428	51	25.03	0	0	0	0	0	0	0	0
0:50:07	Light	1-10-10h	2	244.67	8.92054	36.46	0.6581	80.31%	19.27%	4.7146	1.8791	167.6946	0.5538	8.5126	34.79	8.9054	8.8556	51	25.1	0	0	0	0	0	0	0	0
0:50:24	Light	1-10-10h	3	244.67	8.93278	36.51	0.6581	80.22%	19.27%	4.7159	1.8693	106.1694	0.5542	8.5094	34.78	8.9122	8.8518	51	25.09	0	0	0	0	0	0	0	0
0:52:37	Light	1-2-10h	1	244.67	8.79745	35.96	0.6447	80.45%	18.65%	4.5632	1.6711	95.2271	0.5436	8.3946	34.31	8.7768	8.6799	51	25.04	0	0	0	0	0	0	0	0
0:52:54	Light	1-2-10h	2	244.67	8.79427	35.94	0.6447	80.51%	18.66%	4.5648	1.6589	73.3447	0.5438	8.3942	34.31	8.7953	8.693	51	25.1	0	0	0	0	0	0	0	0
0:53:13	Light	1-2-10h	3	244.67	8.79661	35.95	0.6446	80.49%	18.65%	4.5643	1.6491	93.9154	0.5446	8.3805	34.25	8.7907	8.6846	51	25.09	0	0	0	0	0	0	0	0
0:54:15	Light	1-20-2-50min	1	244.67	9.08877	37.15	0.6703	81.31%	20.25%	4.9535	1.9182	218.6774	0.5706	8.681	35.48	9.071	9.0355	51	25.07	0	0	0	0	0	0	0	0
0:54:38	Light	1-20-2-50min	2	244.67	9.07853	37.11	0.6703	81.27%	20.21%	4.9457	1.9353	95.3135	0.57	8.6761	35.46	9.0801	9.0425	51	25.07	0	0	0	0	0	0	0	0
0:55:09	Light	1-20-2-50min	3	244.67	9.07135	37.08	0.6702	81.40%	20.23%	4.9487	1.928	42.9343	0.5703	8.6772	35.46	9.0798	9.03	51	25.04	0	0	0	0	0	0	0	0
0:56:04	Light	1-5-10h	1	244.67	8.86772	36.24	0.6523	80.16%	18.95%	4.6369	1.7249	237.6689	0.549	8.4458	34.52	8.8735	8.7621	51	25.07	0	0	0	0	0	0	0	0
0:56:43	Light	1-5-10h	2	244.67	8.8603	36.21	0.6523	80.22%	18.95%	4.6362	1.7225	403.2429	0.5492	8.4421	34.5	8.876	8.7841	51	25.02	0	0	0	0	0	0	0	0
0:56:59	Light	1-5-10h	3	244.67	8.86806	36.24	0.6522	80.13%	18.94%	4.6347	1.7249	79.9847	0.549	8.4428	34.51	8.8739	8.7569	51	25.1	0	0	0	0	0	0	0	0
0:57:49	Light	1-0-10h	1	244.67	8.63137	35.28	0.633	80.70%	18.02%	4.4092	1.5537	105.9199	0.5366	8.2171	33.58	8.6262	8.4727	51	25.04	0	0	0	0	0	0	0	0
0:58:49	Light	1-0-10h	1	244.67	8.61853	35.23	0.6331	80.81%	18.02%	4.4091	1.5561	75.9595	0.5365	8.2189	33.59	8.6248	8.4742	51	25.05	0	0	0	0	0	0	0	0
0:59:05	Light	1-0-10h	2	244.67	8.6062	35.17	0.6331	80.85%	18.00%	4.4051	1.5585	61.8676	0.5363	8.2132	33.57	8.6153	8.47	51	25.1	0	0	0	0	0	0	0	0
0:59:23	Light	1-0-10h	3	244.67	8.61626	35.22	0.6331	80.90%	18.04%	4.4131	1.5488	10016.6258	0.536	8.233	33.65	8.6315	8.4784	51	25.09	0	0	0	0	0	0	0	0
1:06:53	Light	1-20-2-1h	1	244.67	9.09217	37.16	0.6705	81.37%	20.27%	4.9604	1.9353	9329.6018	0.5708	8.6908	35.52	9.0842	9.0678	51	24.98	0	0	0	0	0	0	0	0
1:07:04	Light	1-20-2-1h	2	244.67	9.08491	37.13	0.6704	81.46%	20.28%	4.9612	1.9207	100.3892	0.5711	8.6878	35.51	9.0886	9.055	51	25.06	0	0	0	0	0	0	0	0
1:07:14	Light	1-20-2-1h	3	244.67	9.08406	37.13	0.6704	81.41%	20.26%	4.9581	1.9158	127.1668	0.5712	8.6804	35.48	9.0842	9.0594	51	25.09555	0	0	0	0	0	0	0	0
1:38:38	Light	1-20-2-1.5h	1	244.67	9.09657	37.18	0.6702	81.43%	20.29%	4.9646	1.9182	598.539	0.5705	8.7022	35.57	9.0968	9.065	51	25.03	0	0	0	0	0	0	0	0
1:38:49	Light	1-20-2-1.5h	2	244.67	9.10691	37.22	0.6701	81.40%	20.30%	4.9673	1.9011	148.126	0.571	8.6989	35.55	9.0951	9.0608	51	25.09	0	0	0	0	0	0	0	0
1:39:05	Light	1-20-2-1.5h	3	244.67	9.09856	37.19	0.6702	81.41%	20.29%	4.9642	1.906	447.1743	0.5708	8.6963	35.54	9.0913	9.0622	51	25.1	0	0	0	0	0	0	0	0
1:40:28	Light	1-30-10h	1	244.67	9.05375	37	0.6668	80.55%	19.87%	4.8626	1.9378	27.9505	0.5666	8.5823	35.08	9.0616	8.9842	51	25.04	0	0	0	0	0	0	0	0
1:40:41	Light	1-30-10h	2	244.67	9.05461	37.01	0.6668	80.60%	19.89%	4.8664	1.928	75.3577	0.5665	8.5897	35.11	9.0574	8.9783	51	25.09988	0	0	0	0	0	0	0	0
1:40:51	Light	1-30-10h	3	244.67	9.0706	37.07	0.6669	80.63%	19.94%	4.8776	1.8864	46.3619	0.5684	8.5809	35.07	9.0607	8.9791	51	25.09988	0	0	0	0	0	0	0	0
1:50:15	Light	1-10-11h	1	244.67	8.94602	36.56	0.6584	80.21%	19.31%	4.7243	1.8766	67.6292	0.5546	8.5178	34.81	8.9396	8.8664	51	25.01	0	0	0	0	0	0	0	0
1:50:27	Light	1-10-11h	2	244.67	8.94328	36.55	0.6582	80.34%	19.33%	4.7292	1.857	181.2894	0.5546	8.5269	34.85	8.9456	8.8665	51	25.09	0	0	0	0	0	0	0	0
1:50:42	Light	1-10-11h	3	244.67	8.94814	36.57	0.6582	80.27%	19.32%	4.7275	1.8522	856.6121	0.5546	8.5244	34.84	8.9459	8.8621	51	25.1	0	0	0	0	0	0	0	0
1:51:59	Light	1-2-11h	1	244.67	8.78668	35.91	0.6448	80.54%	18.65%	4.5633	1.6686	292.9843	0.5441	8.3873	34.28	8.7908	8.6879	51	25.04	0	0	0	0	0	0	0	0
1:52:14	Light	1-2-11h	2	244.67	8.79396	35.94	0.6446	80.47%	18.64%	4.5618	1.6613	298.3889	0.5443	8.3804	34.25	8.8051	8.6683	51	25.1	0	0	0	0	0	0	0	0
1:52:31	Light	1-2-11h	3	244.67	8.78919	35.92	0.6446	80.56%	18.65%	4.5643	1.6564	41.186	0.5445	8.3818	34.26	8.7924	8.6906	51	25.1	0	0	0	0	0	0	0	0
1:53:27	Light	1-5-11h	1	244.67	8.87007	36.25	0.6524	80.11%	18.95%	4.636	1.7518	39.5809	0.5486	8.451	34.54	8.8615	8.7693	51	25.05	0	0	0	0	0	0	0	0
1:53:44	Light	1-5-11h	2	244.67	8.86311	36.22	0.6525	80.17%	18.95%	4.6364	1.7396	61.016	0.549	8.4453	34.52	8.8707	8.7719	51	25.1	0	0	0	0	0	0	0	0
1:54:01	Light	1-5-11h	3	244.67	8.87453	36.27	0.6524	80.09%	18.95%	4.6368	1.7372	54.4897	0.5491	8.4443	34.51	8.8681	8.7814	51	25.1	0	0	0	0	0	0	0	0
1:55:09	Light	1-0-11h	1	244.67	8.63402	35.29	0.6329	80.82%	18.05%	4.4166	1.5463	115.7531	0.5356	8.2453	33.7	8.6435	8.4882	51	25.05	0	0	0	0	0	0	0	0
1:55:26	Light	1-0-11h	2	244.67	8.61738	35.22	0.6329	80.97%	18.05%	4.4163	1.539	477.5905	0.5367	8.2288	33.63	8.6341	8.4962	51	25.1	0	0	0	0	0	0	0	0
1:55:43	Light	1-0-11h	3	244.67	8.62527	35.25	0.6328	80.92%	18.05%	4.4169	1.5341	142.9631	0.5369	8.2273	33.63	8.6163	8.4659	51	25.1	0	0	0	0	0	0	0	0
2:11:53	Light	1-20-2-2h	1	244.67	9.08706	37.14	0.6701	81.43%	20.27%	4.9588	1.9158	32.024	0.5706	8.6898	35.52	9.0783	9.048	51	25.01	0	0	0	0	0	0	0	0
2:12:05	Light	1-20-2-2h	2	244.67	9.0755	37.09	0.6701	81.50%	20.26%	4.9565	1.9109	268.3061	0.5707	8.6843	35.49	9.091	9.0469	51	25.09	0	0	0	0	0	0	0	0
2:12:14	Light	1-20-2-2h	3	244.67	9.08937	37.15	0.6701	81.42%	20.27%	4.9589	1.8962	112.1347	0.5711	8.683	35.49	9.085	9.0521	51	25.09988	0	0	0	0	0	0	0	0
2:42:26	Light	1-30-11h	1	244.67	9.04718	36.98	0.6668	80.57%	19.86%	4.8603	1.9402	374.9026	0.5666	8.5785	35.06	9.0562	8.9763	51	24.99	0	0	0	0	0	0	0	0
2:42:36	Light	1-30-11h	2	244.67	9.05688	37.02	0.6667	80.49%	19.86%	4.8601	1.9353	67.6333	0.5664	8.5804	35.07	9.0488	8.9635	51	25.07	0	0	0	0	0	0	0	0
2:42:46	Light	1-30-11h	3	244.67	9.05311	37	0.6667	80.53%	19.87%	4.8605	1.928	177.4054	0.5667	8.577	35.06	9.0553	8.9686	51	25.09771	0	0	0	0	0	0	0	0
2:50:00	Light	1-10-12h	1	244.67	8.94151	36.55	0.6582	80.23%	19.30%	4.7219	1.8644	38.7469	0.5545	8.5149	34.8	8.9303	8.8637	51	25.01	0	0	0	0	0	0	0	0
2:50:09	Light	1-10-12h	2	244.67	8.94411	36.56	0.6581	80.28%	19.31%	4.7255	1.8522	690.994	0.5546	8.5206	34.82	8.9449	8.8593	51	25.09	0	0	0	0	0	0	0	0
2:50:27	Light	1-10-12h	3	244.67	8.93179	36.51	0.6582	80.36%	19.31%	4.7241	1.8473	125.7552	0.555	8.5118	34.79	8.9414	8.875	51	25.1	0	0	0	0	0	0	0	0
2:51:21	Light	1-2-12h	1	244.67	8.80809	36	0.6447	80.52%	18.69%	4.5721	1.6662	197.1876	0.5436	8.4112	34.38	8.8128	8.6978	51	25.04	0	0	0	0	0	0	0	0
2:51:38	Light	1-2-12h	2	244.67	8.80367	35.98	0.6447	80.55%	18.69%	4.572	1.6564	576.2789	0.5445	8.3971	34.32	8.8138	8.6852	51	25.1	0	0	0	0	0	0	0	0
2:51:56	Light	1-2-12h	3	244.67	8.80718	36	0.6447	80.50%	18.68%	4.571	1.654	36.3792	0.5445	8.3944	34.31	8.8037	8.6936	51	25.1	0	0	0	0	0	0	0	0
2:53:18	Light	1-0-12h	1	244.67	8.61395	35.21	0.6327	80.82%	18.00%	4.4048	1.5634	101.2744	0.5357	8.2222	33.61	8.6167	8.4647	51	25.05	0	0	0	0	0	0	0	0
2:53:37	Light	1-0-12h	2	244.67	8.61586	35.21	0.6326	80.90%	18.02%	4.4092	1.5414	187.3213	0.5363	8.2209	33.6	8.6217	8.4685	51	25.1	0	0	0	0	0	0	0	0
2:53:56	Light	1-0-12h	3	244.67	8.61106	35.19	0.6327	80.97%	18.03%	4.4112	1.5414	122.2408	0.5356	8.2362	33.66	8.6341	8.4641	51	25.09	0	0	0	0	0	0	0	0
2:55:15	Light	1-5-12h	1	244.67	8.87203	36.26	0.6524	80.11%	18.95%	4.637	1.7396	52.689	0.5491	8.4453	34.52	8.8711	8.7681	51	25.05	0	0	0	0	0	0	0	0
2:55:34	Light	1-5-12h	2	244.67	8.86554	36.23	0.6525	80.14%	18.95%	4.636	1.7396	36.441	0.5491	8.4424	34.51	8.857	8.7603	51	25.08	0	0	0	0	0	0	0	0
2:55:52	Light	1-5-12h	3	244.67	8.86574	36.24	0.6525	80.12%	18.94%	4.6347	1.7372	129.8545	0.5491	8.4408	34.5	8.865	8.7778	51	25.09	0	0	0	0	0	0	0	0
3:14:50	Light	1-20-2-3h	1	244.67	9.08968	37.15	0.6699	81.33%	20.24%	4.9521	1.928	19167.4141	0.5697	8.6931	35.53	9.0779	9.0427	51	25.04	0	0	0	0	0	0	0	0
3:15:08	Light	1-20-2-3h	2	244.67	9.08915	37.15	0.6699	81.29%	20.23%	4.9494	1.9182	105.5973	0.5698	8.686	35.5	9.108	9.049	51	25.09	0	0	0	0	0	0	0	0
3:15:25	Light	1-20-2-3h	3	244.67	9.0993	37.19	0.6699	81.32%	20.26%	4.9567	1.8986	2812.4179	0.5706	8.6872	35.51	9.0912	9.0583	51	25.1	0	0	0	0	0	0	0	0
3:44:24	Light	1-20-2-3h	4	244.67	9.05582	37.01	0.6666	80.32%	19.82%	4.8484	1.9696	117.9914	0.5655	8.5738	35.04	9.0381	8.9519	51	25.04	0	0	0	0	0	0	0	0
3:44:54	Light	1-30-12h	1	244.67	9.03493	36.93	0.6666	80.63%	19.85%	4.8563	1.9451	198.4156	0.5656	8.5864	35.09	9.0528	8.9817	51	25.03	0	0	0	0	0	0	0	0
3:45:10	Light	1-30-12h	2	244.67	9.04714	36.98	0.6665	80.51%	19.84%	4.8549	1.9353	149.5638	0.5661	8.576	35.05	9.0552	8.9676	51	25.09	0	0	0	0	0	0	0	0
4:01:31	Light	2-260C-before	1	244.67	9.10947	37.23	0.6685	81.40%	20.26%	4.9572	1.928	119.1747	0.5696	8.7029	35.57	9.1219	9.0977	51	24.99	0	0	0	0	0	0	0	0
4:01:43	Light	2-260C-before	2	244.67	9.11458	37.25	0.6685	81.27%	20.24%	4.9519	1.9329	169.2052	0.5697	8.6915	35.52	9.1071	9.0837	51	25.09	0	0	0	0	0	0	0	0
4:02:04	Light	2-260C-before	3	244.67	9.11761	37.26	0.6687	81.22%	20.24%	4.9517	1.9353	249.1258	0.5699	8.6892	35.51	9.1104	9.0706	51	25.08	0	0	0	0	0	0	0	0
4:03:50	Light	2-240C-before	1	244.67	9.11137	37.24	0.6678	81.38%	20.24%	4.9519	1.8962	122.148	0.5695	8.6957	35.54	9.1184	9.073	51	25.02	0	0	0	0	0	0	0	0
4:04:07	Light	2-240C-before	2	244.67	9.11666	37.26	0.668	81.22%	20.22%	4.9461	1.9133	46.9313	0.5691	8.6914	35.52	9.11	9.0773	51	25.1	0	0	0	0	0	0	0	0
4:04:26	Light	2-240C-before	3	244.67	9.10735	37.22	0.6681	81.31%	20.22%	4.9475	1.9158	468.6968	0.5693	8.691	35.52	9.1124	9.0594	51	25.09	0	0	0	0	0	0	0	0
4:05:46	Light	2-220C-before	1	244.67	9.10171	37.2	0.667	81.36%	20.19%	4.9393	1.8717	117.2483	0.5689	8.6817	35.48	9.0925	9.0554	51	25.04	0	0	0	0	0	0	0	0
4:06:03	Light	2-220C-before	2	244.67	9.0903	37.15	0.6672	81.41%	20.18%	4.9377	1.884	76.9029	0.569	8.6777	35.47	9.0911	9.0572	51	25.08	0	0	0	0	0	0	0	0
4:06:22	Light	2-220C-before	3	244.67	9.08836	37.15	0.6673	81.40%	20.18%	4.9367	1.8815	164.5487	0.5693	8.6717	35.44	9.0959	9.0581	51	25.09	0	0	0	0	0	0	0	0
4:07:58	Light	2-200C-before	1	244.67	9.10982	37.23	0.6661	81.54%	20.22%	4.9482	1.8106	361.8202	0.569	8.6956	35.54	9.11	9.0663	51	25.03	0	0	0	0	0	0	0	0
4:08:13	Light	2-200C-before	2	244.67	9.11495	37.25	0.6663	81.45%	20.22%	4.947	1.8203	525.9238	0.569	8.6938	35.53	9.1163	9.0723	51	25.09	0	0	0	0	0	0	0	0
4:08:31	Light	2-200C-before	3	244.67	9.09472	37.17	0.6663	81.61%	20.21%	4.9451	1.8179	70.763	0.5692	8.6877	35.51	9.0981	9.0647	51	25.08	0	0	0	0	0	0	0	0
4:09:25	Light	2-160C-before	1	244.67	9.09215	37.16	0.6672	81.57%	20.22%	4.948	1.8668	1041.6498	0.5695	8.689	35.51	9.096	9.0637	51	25.03	0	0	0	0	0	0	0	0
4:09:38	Light	2-160C-before	2	244.67	9.08256	37.12	0.6673	81.53%	20.20%	4.9416	1.906	113.5046	0.5687	8.6885	35.51	9.103	9.059	51	25.09	0	0	0	0	0	0	0	0
4:09:58	Light	2-160C-before	3	244.67	9.09613	37.18	0.6674	81.36%	20.19%	4.9389	1.9084	74.3858	0.5686	8.6853	35.5	9.0863	9.0654	51	25.08	0	0	0	0	0	0	0	0
4:16:01	Light	1-20-2-4h	1	244.67	9.09474	37.17	0.67	81.34%	20.26%	4.9563	1.9158	1238.027	0.5701	8.6933	35.53	9.0975	9.0619	51	25	0	0	0	0	0	0	0	0
4:16:13	Light	1-20-2-4h	2	244.67	9.08855	37.15	0.6699	81.50%	20.28%	4.9619	1.8913	15346.3366	0.5709	8.6906	35.52	9.0813	9.0521	51	25.09	0	0	0	0	0	0	0	0
4:16:27	Light	1-20-2-4h	3	244.67	9.0929	37.16	0.6699	81.46%	20.28%	4.9619	1.8889	2655.3459	0.5711	8.6885	35.51	9.094	9.0479	51	25.1	0	0	0	0	0	0	0	0
4:44:39	Light	2-160C-After	1	244.67	9.12532	37.3	0.6699	81.72%	20.42%	4.9958	1.8546	105.3292	0.5721	8.732	35.69	9.1274	9.0854	51	25.02	0	0	0	0	0	0	0	0
4:44:56	Light	2-160C-After	2	244.67	9.13805	37.35	0.6702	81.53%	20.41%	4.9931	1.8668	112.4321	0.5723	8.7243	35.66	9.1292	9.0979	51	25.07	0	0	0	0	0	0	0	0
4:45:11	Light	2-160C-After	3	244.67	9.12106	37.28	0.6701	81.63%	20.39%	4.9893	1.8717	261.9152	0.5719	8.7239	35.66	9.1238	9.0871	51	25.09	0	0	0	0	0	0	0	0
4:56:30	Light	2-160C-10min	1	244.67	9.13657	37.34	0.6701	81.52%	20.40%	4.9913	1.8717	129.2289	0.5721	8.7248	35.66	9.1123	9.0882	51	25.03	0	0	0	0	0	0	0	0
4:56:41	Light	2-160C-10min	2	244.67	9.13301	37.33	0.67	81.62%	20.41%	4.9943	1.8473	84.0396	0.573	8.7154	35.62	9.1383	9.0911	51	25.1	0	0	0	0	0	0	0	0
4:56:57	Light	2-160C-10min	3	244.67	9.12214	37.28	0.67	81.74%	20.42%	4.9957	1.8522	53.6972	0.5728	8.722	35.65	9.1235	9.0923	51	25.1	0	0	0	0	0	0	0	0
5:09:22	Light	2-160C-20min	1	244.67	9.11675	37.26	0.6701	81.62%	20.38%	4.9864	1.8791	221.6155	0.5718	8.7212	35.64	9.127	9.0923	51	25	0	0	0	0	0	0	0	0
5:09:34	Light	2-160C-20min	2	244.67	9.10697	37.22	0.67	81.86%	20.41%	4.9946	1.8497	78.7986	0.5727	8.7205	35.64	9.1088	9.0857	51	25.09	0	0	0	0	0	0	0	0
5:09:49	Light	2-160C-20min	3	244.67	9.12417	37.29	0.6701	81.68%	20.41%	4.9942	1.8497	33.9591	0.5728	8.7187	35.63	9.1095	9.0883	51	25.1	0	0	0	0	0	0	0	0
5:21:43	Light	2-160C-30min	1	244.67	9.12199	37.28	0.6701	81.48%	20.36%	4.9806	1.906	50.4009	0.5707	8.7275	35.67	9.1214	9.0818	51	25.06	0	0	0	0	0	0	0	0
5:21:55	Light	2-160C-30min	2	244.67	9.11981	37.27	0.6701	81.65%	20.39%	4.9897	1.8717	122.9188	0.5721	8.7221	35.65	9.1174	9.0899	51	25.09	0	0	0	0	0	0	0	0
5:22:09	Light	2-160C-30min	3	244.67	9.13108	37.32	0.67	81.58%	20.40%	4.9907	1.8595	232.3007	0.5727	8.7142	35.62	9.113	9.0915	51	25.1	0	0	0	0	0	0	0	0
5:23:17	Light	1-30-2-5h	1	244.67	9.10264	37.2	0.6695	81.18%	20.22%	4.9473	1.9182	75.1841	0.5689	8.697	35.55	9.1023	9.0609	51	25.03	0	0	0	0	0	0	0	0
5:23:30	Light	1-30-2-5h	2	244.67	9.09223	37.16	0.6696	81.40%	20.25%	4.9558	1.8889	145.666	0.57	8.6943	35.53	9.0831	9.0629	51	25.1	0	0	0	0	0	0	0	0
5:23:48	Light	1-30-2-5h	3	244.67	9.09512	37.17	0.6695	81.37%	20.25%	4.9549	1.884	127.633	0.5703	8.6884	35.51	9.1023	9.0626	51	25.09	0	0	0	0	0	0	0	0
5:29:37	Light	2-200C-After	1	244.67	9.13505	37.34	0.6694	81.90%	20.47%	5.0082	1.8081	259.3072	0.5727	8.7443	35.74	9.1447	9.101	51	25.02	0	0	0	0	0	0	0	0
5:29:54	Light	2-200C-After	2	244.67	9.12815	37.31	0.6694	81.85%	20.44%	5.0013	1.8228	37.1961	0.5724	8.7381	35.71	9.136	9.1145	51	25.07	0	0	0	0	0	0	0	0
5:30:11	Light	2-200C-After	3	244.67	9.14739	37.39	0.6694	81.66%	20.44%	5.0001	1.8179	104.6028	0.5722	8.7379	35.71	9.1355	9.0973	51	25.07	0	0	0	0	0	0	0	0
5:33:02	Light	2-160C-40min	1	244.67	9.11282	37.25	0.6701	81.47%	20.33%	4.9752	1.9084	163.2813	0.5706	8.7192	35.64	9.1023	9.0835	51	25.04	0	0	0	0	0	0	0	0
5:33:16	Light	2-160C-40min	2	244.67	9.1222	37.28	0.67	81.54%	20.37%	4.9833	1.884	86.6292	0.5715	8.7197	35.64	9.111	9.0847	51	25.1	0	0	0	0	0	0	0	0
5:33:31	Light	2-160C-40min	3	244.67	9.11617	37.26	0.67	81.60%	20.37%	4.9843	1.8742	1789.0468	0.5718	8.717	35.63	9.1172	9.0678	51	25.1	0	0	0	0	0	0	0	0
5:42:25	Light	2-200C-10min	1	244.67	9.13768	37.35	0.669	81.64%	20.40%	4.9905	1.8081	127.4322	0.5717	8.7288	35.68	9.1327	9.0868	51	25.01	0	0	0	0	0	0	0	0
5:42:39	Light	2-200C-10min	2	244.67	9.13481	37.34	0.6691	81.66%	20.40%	4.9914	1.8228	513.4077	0.5714	8.7359	35.7	9.1308	9.0896	51	25.08	0	0	0	0	0	0	0	0
5:42:54	Light	2-200C-10min	3	244.67	9.13524	37.34	0.669	81.65%	20.39%	4.99	1.9476	90.6094	0.5716	8.7301	35.68	9.1371	9.0939	51	25.09	0	0	0	0	0	0	0	0
5:44:36	Light	2-160C-50min	1	244.67	9.11995	37.27	0.67	81.54%	20.36%	4.9821	1.884	48.8737	0.5714	8.7197	35.64	9.0914	9.0846	51	25.04	0	0	0	0	0	0	0	0
5:44:49	Light	2-160C-50min	2	244.67	9.12421	37.29	0.67	81.57%	20.38%	4.9864	1.8693	4033.594	0.5719	8.7192	35.64	9.1178	9.081	51	25.1	0	0	0	0	0	0	0	0
5:45:06	Light	2-160C-50min	3	244.67	9.11465	37.25	0.67	81.64%	20.38%	4.9859	1.8619	270.7072	0.5722	8.7134	35.61	9.1121	9.096	51	25.1	0	0	0	0	0	0	0	0
5:55:06	Light	2-200C-20min	1	244.67	9.13444	37.33	0.6688	81.54%	20.36%	4.9811	1.9549	650.1784	0.5704	8.7328	35.69	9.1254	9.0991	51	25.04	0	0	0	0	0	0	0	0
5:55:19	Light	2-200C-20min	2	244.67	9.12742	37.31	0.6687	81.69%	20.38%	4.986	1.9451	89.5288	0.5707	8.7361	35.71	9.1194	9.087	51	25.1	0	0	0	0	0	0	0	0
5:55:35	Light	2-200C-20min	3	244.67	9.12328	37.29	0.6687	81.71%	20.37%	4.9848	1.9476	204.1184	0.5707	8.735	35.7	9.1223	9.0878	51	25.1	0	0	0	0	0	0	0	0
5:56:30	Light	2-160C-1h	1	244.67	9.11574	37.26	0.67	81.48%	20.34%	4.9763	1.9035	76.8836	0.5707	8.7197	35.64	9.1248	9.0804	51	25.04	0	0	0	0	0	0	0	0
5:56:44	Light	2-160C-1h	2	244.67	9.11371	37.25	0.67	81.53%	20.35%	4.9781	1.8889	64.283	0.5712	8.7152	35.62	9.1122	9.083	51	25.1	0	0	0	0	0	0	0	0
5:57:01	Light	2-160C-1h	3	244.67	9.10106	37.2	0.67	81.72%	20.37%	4.9831	1.8766	67.1747	0.5718	8.7143	35.62	9.1153	9.0691	51	25.1	0	0	0	0	0	0	0	0
6:09:04	Light	2-200C-30	1	244.67	9.12492	37.29	0.6683	81.59%	20.34%	4.9758	1.95	13090.4701	0.5697	8.7341	35.7	9.1273	9.081	51	25.04	0	0	0	0	0	0	0	0
6:09:20	Light	2-200C-30min	1	244.67	9.11748	37.26	0.6684	81.64%	20.33%	4.9751	1.95	84.027	0.5698	8.7319	35.69	9.1226	9.0837	51	25.09	0	0	0	0	0	0	0	0
6:09:35	Light	2-200C-30min	2	244.67	9.12298	37.29	0.6683	81.58%	20.33%	4.9736	1.95	73.0516	0.5697	8.7298	35.68	9.123	9.085	51	25.1	0	0	0	0	0	0	0	0
6:10:47	Light	2-220C-After	1	244.67	9.12456	37.29	0.6692	81.69%	20.39%	4.9883	1.8155	58.3342	0.5719	8.7227	35.65	9.13	9.0941	51	25.03	0	0	0	0	0	0	0	0
6:11:01	Light	2-220C-After	2	244.67	9.10646	37.22	0.6695	81.76%	20.37%	4.9847	1.8326	2355.348	0.5718	8.7174	35.63	9.1211	9.0774	51	25.09771	0	0	0	0	0	0	0	0
6:11:19	Light	2-220C-After	3	244.67	9.12	37.27	0.6695	81.57%	20.36%	4.9807	1.835	85.1423	0.5718	8.7111	35.6	9.1239	9.0749	51	25.1	0	0	0	0	0	0	0	0
6:23:42	Light	2-200C-40min	1	244.67	9.12611	37.3	0.6682	81.44%	20.30%	4.9661	1.9647	102.5114	0.5688	8.7304	35.68	9.1255	9.0908	51	25.01	0	0	0	0	0	0	0	0
6:23:52	Light	2-200C-40min	2	244.67	9.11456	37.25	0.6681	81.65%	20.32%	4.9718	1.9427	1412.215	0.5696	8.7291	35.68	9.1169	9.0909	51	25.09	0	0	0	0	0	0	0	0
6:24:07	Light	2-200C-40min	3	244.67	9.1224	37.28	0.6682	81.53%	20.31%	4.9699	1.95	1978.2901	0.5693	8.7294	35.68	9.1281	9.0794	51	25.1	0	0	0	0	0	0	0	0
6:25:40	Light	1-20-2-6h	1	244.67	9.09363	37.17	0.6694	81.24%	20.21%	4.9452	1.906	56.259	0.5689	8.6922	35.53	9.095	9.0613	51	25.02	0	0	0	0	0	0	0	0
6:25:49	Light	1-20-2-6h	2	244.67	9.08838	37.15	0.6694	81.36%	20.23%	4.9497	1.8766	52.6632	0.5698	8.6871	35.51	9.0994	9.048	51	25.1	0	0	0	0	0	0	0	0
6:26:10	Light	1-20-2-6h	3	244.67	9.08847	37.15	0.6694	81.40%	20.24%	4.9522	1.8815	103.2242	0.5699	8.69	35.52	9.0913	9.0533	51	25.08	0	0	0	0	0	0	0	0
6:27:24	Light	2-220C-10min	1	244.67	9.10151	37.2	0.6684	81.45%	20.25%	4.9549	1.9598	125.8176	0.5693	8.7028	35.57	9.0991	9.0711	51	25.05	0	0	0	0	0	0	0	0
6:27:44	Light	2-220C-10min	2	244.67	9.09622	37.18	0.6683	81.49%	20.25%	4.9538	1.9427	83.4137	0.5698	8.6942	35.53	9.101	9.0631	51	25.09	0	0	0	0	0	0	0	0
6:28:01	Light	2-220C-10min	3	244.67	9.10071	37.2	0.6683	81.47%	20.25%	4.955	1.9402	93.7765	0.5699	8.6944	35.54	9.0976	9.0586	51	25.1	0	0	0	0	0	0	0	0
6:29:14	Light	2-160C-1h30min	1	244.67	9.10611	37.22	0.6698	81.63%	20.35%	4.9786	1.8595	90.4861	0.5718	8.7067	35.59	9.1058	9.0686	51	25.05	0	0	0	0	0	0	0	0
6:29:33	Light	2-160C-1h30min	2	244.67	9.1039	37.21	0.6698	81.61%	20.34%	4.9766	1.8717	303.1926	0.5715	8.7074	35.59	9.1092	9.0774	51	25.09	0	0	0	0	0	0	0	0
6:29:51	Light	2-160C-1h30min	3	244.67	9.10662	37.22	0.6698	81.60%	20.34%	4.9772	1.8693	670.974	0.5717	8.7056	35.58	9.1086	9.0623	51	25.1	0	0	0	0	0	0	0	0
6:41:32	Light	2-200C-50min	1	244.67	9.11887	37.27	0.6682	81.40%	20.27%	4.9597	1.95	438.2982	0.5694	8.7101	35.6	9.1126	9.0666	51	25	0	0	0	0	0	0	0	0
6:41:49	Light	2-200C-50min	2	244.67	9.1009	37.2	0.6681	81.54%	20.26%	4.9582	1.9525	205.3913	0.5692	8.7108	35.6	9.1071	9.0702	51	25.07	0	0	0	0	0	0	0	0
6:42:00	Light	2-200C-50min	3	244.67	9.10534	37.21	0.668	81.54%	20.27%	4.9595	1.9451	47.8708	0.5693	8.711	35.6	9.1191	9.0587	51	25.1	0	0	0	0	0	0	0	0
6:44:45	Light	2-220C-20min	1	244.67	9.08486	37.13	0.6677	81.45%	20.19%	4.9405	1.9256	50.3983	0.5691	8.6818	35.48	9.0822	9.0569	51	25	0	0	0	0	0	0	0	0
6:44:56	Light	2-220C-20min	2	244.67	9.09829	37.19	0.6677	81.35%	20.20%	4.9421	1.9256	424.9957	0.569	8.6861	35.5	9.084	9.0407	51	25.08	0	0	0	0	0	0	0	0
6:45:13	Light	2-220C-20min	3	244.67	9.08629	37.14	0.6677	81.47%	20.20%	4.9425	1.9256	607.3654	0.5692	8.6836	35.49	9.0819	9.0427	51	25.09	0	0	0	0	0	0	0	0
6:54:44	Light	2-200C-1h	1	244.67	9.11725	37.26	0.6681	81.56%	20.31%	4.968	1.928	1175.9958	0.5701	8.7151	35.62	9.1323	9.0735	51	25	0	0	0	0	0	0	0	0
6:54:56	Light	2-200C-1h	2	244.67	9.11047	37.24	0.668	81.51%	20.27%	4.9606	1.9451	168.9695	0.5689	8.7194	35.64	9.1106	9.0877	51	25.08	0	0	0	0	0	0	0	0
6:55:11	Light	2-200C-1h	3	244.67	9.11704	37.26	0.6679	81.53%	20.29%	4.9645	1.9329	125.0062	0.5696	8.7162	35.62	9.1198	9.0822	51	25.1	0	0	0	0	0	0	0	0
6:56:18	Light	2-220C-30min	1	244.67	9.10581	37.22	0.6673	81.17%	20.16%	4.9319	1.9304	28425.3214	0.5679	8.6848	35.5	9.0883	9.0549	51	25.04	0	0	0	0	0	0	0	0
6:56:33	Light	2-220C-30min	2	244.67	9.08913	37.15	0.6672	81.42%	20.18%	4.9374	1.9231	52.2355	0.5682	8.6897	35.52	9.0889	9.0433	51	25.1	0	0	0	0	0	0	0	0
6:56:50	Light	2-220C-30min	3	244.67	9.09549	37.17	0.6672	81.35%	20.18%	4.9365	1.9158	269.2656	0.5683	8.6864	35.5	9.069	9.0529	51	25.09	0	0	0	0	0	0	0	0
7:01:59	Light	2-160C-2h	1	244.67	9.10599	37.22	0.67	81.56%	20.34%	4.976	1.8913	293.5031	0.5713	8.7098	35.6	9.1087	9.0607	51	24.99	0	0	0	0	0	0	0	0
7:02:09	Light	2-160C-2h	2	244.67	9.10335	37.21	0.6699	81.61%	20.34%	4.977	1.8791	91.4752	0.5714	8.7103	35.6	9.1145	9.0627	51	25.08	0	0	0	0	0	0	0	0
7:02:30	Light	2-160C-2h	3	244.67	9.10155	37.2	0.6699	81.64%	20.34%	4.9776	1.8815	67.6809	0.5714	8.712	35.61	9.1083	9.0721	51	25.07	0	0	0	0	0	0	0	0
7:08:15	Light	2-220C-40min	1	244.67	9.08957	37.15	0.6671	81.34%	20.16%	4.9323	1.9133	101.9938	0.5679	8.6845	35.49	9.0895	9.0515	51	24.97	0	0	0	0	0	0	0	0
7:08:24	Light	2-220C-40min	2	244.67	9.08177	37.12	0.6669	81.46%	20.16%	4.9337	1.9109	193.4145	0.5679	8.6877	35.51	9.0888	9.0526	51	25.08	0	0	0	0	0	0	0	0
7:08:43	Light	2-220C-40min	3	244.67	9.08723	37.14	0.6671	81.37%	20.16%	4.9327	1.9109	27020.253	0.568	8.684	35.49	9.0837	9.0377	51	25.09	0	0	0	0	0	0	0	0
7:08:59	Light	2-220C-40min	4	244.67	9.08081	37.11	0.667	81.44%	20.16%	4.9329	1.906	258.4493	0.568	8.6853	35.5	9.0866	9.052	51	25.1	0	0	0	0	0	0	0	0
7:14:52	Light	2-240C-after	1	244.67	9.1247	37.29	0.6696	81.70%	20.40%	4.992	1.8375	96.7616	0.572	8.7277	35.67	9.1216	9.0946	51	25.02	0	0	0	0	0	0	0	0
7:15:02	Light	2-240C-after	2	244.67	9.11932	37.27	0.6695	81.55%	20.35%	4.9789	1.8522	326.2216	0.5711	8.7176	35.63	9.1252	9.095	51	25.1	0	0	0	0	0	0	0	0
7:15:19	Light	2-240C-after	3	244.67	9.12002	37.27	0.6694	81.51%	20.34%	4.9762	1.8522	254.111	0.571	8.7148	35.62	9.1096	9.0739	51	25.09	0	0	0	0	0	0	0	0
7:20:42	Light	2-220C-50min	1	244.67	9.09184	37.16	0.6668	81.17%	20.11%	4.921	1.9304	24.0493	0.5668	8.682	35.48	9.0803	9.0452	51	25.03	0	0	0	0	0	0	0	0
7:20:58	Light	2-220C-50min	2	244.67	9.07937	37.11	0.6668	81.31%	20.12%	4.9227	1.928	1647.7901	0.5671	8.6811	35.48	9.0883	9.0452	51	25.09	0	0	0	0	0	0	0	0
7:21:22	Light	2-220C-50min	3	244.67	9.08943	37.15	0.6668	81.24%	20.12%	4.9237	1.9182	57.6909	0.5672	8.6805	35.48	9.0823	9.0459	51	25.05	0	0	0	0	0	0	0	0
7:26:06	Light	2-200C-1.5h	1	244.67	9.11473	37.25	0.6679	81.29%	20.23%	4.9488	1.9769	402.3226	0.5677	8.7166	35.63	9.1236	9.0746	51	25.02	0	0	0	0	0	0	0	0
7:26:25	Light	2-200C-1.5h	2	244.67	9.12194	37.28	0.6678	81.32%	20.25%	4.954	1.9549	47.9716	0.5685	8.714	35.62	9.1118	9.0712	51	25.05	0	0	0	0	0	0	0	0
7:26:33	Light	2-200C-1.5h	3	244.67	9.12322	37.29	0.6678	81.36%	20.26%	4.9566	1.9353	44.6035	0.5691	8.7095	35.6	9.112	9.0683	51	25.1	0	0	0	0	0	0	0	0
7:28:15	Light	2-240C-10min	1	244.67	9.07937	37.11	0.6663	81.36%	20.12%	4.9221	1.8937	52.9997	0.5671	8.6798	35.48	9.0835	9.0395	51	25.06	0	0	0	0	0	0	0	0
7:28:39	Light	2-240C-10min	2	244.67	9.08028	37.11	0.6663	81.32%	20.11%	4.9199	1.9035	57.727	0.5667	8.6811	35.48	9.0709	9.0391	51	25.05	0	0	0	0	0	0	0	0
7:28:53	Light	2-240C-10min	3	244.67	9.0849	37.13	0.6663	81.28%	20.11%	4.9199	1.8986	356.4903	0.5669	8.6786	35.47	9.0902	9.0413	51	25.1	0	0	0	0	0	0	0	0
7:31:34	Light	1-20-2-7h	1	244.67	9.08149	37.12	0.6694	81.36%	20.22%	4.9461	1.8791	241.9703	0.5699	8.6786	35.47	9.0888	9.0592	51	25.05	0	0	0	0	0	0	0	0
7:31:51	Light	1-20-2-7h	2	244.67	9.07555	37.09	0.6694	81.41%	20.21%	4.9457	1.8766	251.644	0.5702	8.6739	35.45	9.0763	9.041	51	25.1	0	0	0	0	0	0	0	0
7:32:14	Light	1-20-2-7h	3	244.67	9.08221	37.12	0.6694	81.32%	20.21%	4.944	1.8791	115.7351	0.57	8.6741	35.45	9.0826	9.0523	51	25.05	0	0	0	0	0	0	0	0
7:34:08	Light	2-160C-2.5h	1	244.67	9.0928	37.16	0.6698	81.50%	20.29%	4.9635	1.8986	334.9986	0.5705	8.7	35.56	9.0894	9.0455	51	25.09	0	0	0	0	0	0	0	0
7:34:32	Light	2-160C-2.5h	2	244.67	9.0925	37.16	0.6697	81.61%	20.31%	4.9695	1.8693	119.9814	0.5717	8.6928	35.53	9.0954	9.0637	51	25.08	0	0	0	0	0	0	0	0
7:34:51	Light	2-160C-2.5h	3	244.67	9.0889	37.15	0.6697	81.66%	20.32%	4.9706	1.8619	78.3874	0.5719	8.691	35.52	9.0839	9.0471	51	25.09	0	0	0	0	0	0	0	0
7:36:22	Light	2-220C-1h	1	244.67	9.05808	37.02	0.6666	81.32%	20.07%	4.9104	1.9158	50.8466	0.5671	8.6583	35.39	9.0635	9.0171	51	25.08	0	0	0	0	0	0	0	0
7:36:43	Light	2-220C-1h	2	244.67	9.07557	37.09	0.6666	81.17%	20.07%	4.9109	1.9231	71.3202	0.567	8.6608	35.4	9.0641	9.0241	51	25.07	0	0	0	0	0	0	0	0
7:37:00	Light	2-220C-1h	3	244.67	9.06732	37.06	0.6666	81.24%	20.07%	4.9101	1.9182	43.0026	0.5669	8.6612	35.4	9.0569	9.0292	51	25.09	0	0	0	0	0	0	0	0
7:38:15	Light	2-240C-20min	1	244.67	9.06615	37.05	0.6653	81.33%	20.05%	4.9055	1.8644	96.3883	0.5655	8.6739	35.45	9.0631	9.0278	51	25.1	0	0	0	0	0	0	0	0
7:38:56	Light	2-240C-20min	2	244.67	9.07639	37.1	0.6653	81.19%	20.04%	4.9027	1.8766	3950.8472	0.5657	8.6672	35.42	9.0569	9.0215	51	24.99	0	0	0	0	0	0	0	0
7:39:13	Light	2-240C-20min	3	244.67	9.07123	37.08	0.6652	81.18%	20.02%	4.8984	1.8766	39.4763	0.5655	8.662	35.4	9.0703	9.0194	51	25.08	0	0	0	0	0	0	0	0
7:49:53	Light	2-240C-30min	1	244.67	9.05007	36.99	0.6644	81.30%	19.98%	4.8887	1.8424	43.692	0.5649	8.6543	35.37	9.0545	9.0123	51	25	0	0	0	0	0	0	0	0
7:50:00	Light	2-240C-30min	2	244.67	9.0643	37.05	0.6643	81.28%	20.00%	4.8941	1.8252	61.0555	0.5652	8.6585	35.39	9.0443	9.0149	51	25.07	0	0	0	0	0	0	0	0
7:50:08	Light	2-240C-30min	3	244.67	9.06236	37.04	0.6644	81.32%	20.01%	4.8961	1.8252	121.2921	0.565	8.6657	35.42	9.0596	9.0205	51	25.09988	0	0	0	0	0	0	0	0
7:57:16	Light	2-200C-2h	1	244.67	9.09836	37.19	0.6679	81.50%	20.24%	4.9525	1.9402	97.1188	0.569	8.7031	35.57	9.1064	9.0699	51	25.02	0	0	0	0	0	0	0	0
7:57:31	Light	2-200C-2h	2	244.67	9.10083	37.2	0.6679	81.52%	20.25%	4.9549	1.9353	411.1659	0.5692	8.7046	35.58	9.1048	9.0725	51	25.07	0	0	0	0	0	0	0	0
7:57:45	Light	2-200C-2h	3	244.67	9.09585	37.18	0.6678	81.59%	20.26%	4.9559	1.9256	80.0806	0.5694	8.7031	35.57	9.0987	9.0553	51	25.1	0	0	0	0	0	0	0	0
8:01:02	Light	2-240C-40min	1	244.67	9.06624	37.05	0.6635	81.01%	19.92%	4.8731	1.8497	69.7681	0.5625	8.6632	35.41	9.0453	9.0142	51	25.02	0	0	0	0	0	0	0	0
8:01:17	Light	2-240C-40min	2	244.67	9.04565	36.97	0.6634	81.22%	19.92%	4.874	1.8424	65.2747	0.5626	8.6627	35.41	9.065	9.0058	51	25.08	0	0	0	0	0	0	0	0
8:01:31	Light	2-240C-40min	3	244.67	9.04687	36.98	0.6634	81.25%	19.93%	4.8763	1.835	339.3281	0.5628	8.6645	35.41	9.0502	8.9883	51	25.1	0	0	0	0	0	0	0	0
8:04:59	Light	2-160C-3h	1	244.67	9.10802	37.23	0.67	81.52%	20.33%	4.9746	1.8717	35.4755	0.572	8.6966	35.54	9.0844	9.0615	51	25.02	0	0	0	0	0	0	0	0
8:05:09	Light	2-160C-3h	2	244.67	9.10448	37.21	0.6699	81.64%	20.35%	4.9794	1.8473	62.5984	0.5727	8.6944	35.54	9.0897	9.063	51	25.1	0	0	0	0	0	0	0	0
8:05:24	Light	2-160C-3h	3	244.67	9.09866	37.19	0.6699	81.70%	20.35%	4.9797	1.8424	218.5326	0.5732	8.687	35.5	9.0964	9.0684	51	25.08691	0	0	0	0	0	0	0	0
8:07:58	Light	2-220C-1.5h	1	244.67	9.06803	37.06	0.6665	81.16%	20.05%	4.9049	1.9378	258.945	0.5657	8.6709	35.44	9.0695	9.028	51	25.02	0	0	0	0	0	0	0	0
8:08:08	Light	2-220C-1.5h	2	244.67	9.06659	37.06	0.6664	81.29%	20.07%	4.9113	1.9084	621.2616	0.5666	8.6674	35.42	9.0738	9.0327	51	25.1	0	0	0	0	0	0	0	0
8:08:23	Light	2-220C-1.5h	3	244.67	9.08633	37.14	0.6664	81.06%	20.06%	4.9083	1.9182	69.2286	0.5665	8.6647	35.41	9.0757	9.0207	51	25.1	0	0	0	0	0	0	0	0
8:12:30	Light	2-240C-50min	1	244.67	9.05623	37.01	0.6627	81.00%	19.87%	4.8612	1.835	205.7476	0.5615	8.6578	35.39	9.054	8.9987	51	25.04	0	0	0	0	0	0	0	0
8:12:43	Light	2-240C-50min	2	244.67	9.04851	36.98	0.6627	81.14%	19.89%	4.8655	1.8203	95.0454	0.5619	8.6597	35.39	9.0507	9.0082	51	25.1	0	0	0	0	0	0	0	0
8:12:59	Light	2-240C-50min	3	244.67	9.04744	36.98	0.6628	81.07%	19.87%	4.8614	1.8277	36.2403	0.5618	8.6535	35.37	9.041	8.994	51	25.09	0	0	0	0	0	0	0	0
8:17:35	Light	2-260C-after	1	244.67	9.10158	37.2	0.6679	81.39%	20.22%	4.9478	1.9402	244.3303	0.5685	8.7036	35.57	9.108	9.067	51	25.03	0	0	0	0	0	0	0	0
8:17:49	Light	2-260C-after	2	244.67	9.09069	37.15	0.6677	81.33%	20.18%	4.9364	1.9525	166.7694	0.5677	8.6953	35.54	9.1014	9.0503	51	25.09	0	0	0	0	0	0	0	0
8:18:04	Light	2-260C-after	3	244.67	9.09067	37.15	0.6675	81.27%	20.16%	4.9316	1.9476	213.9349	0.5675	8.6906	35.52	9.0999	9.0492	51	25.09	0	0	0	0	0	0	0	0
8:23:49	Light	2-240C-1h	1	244.67	9.04651	36.97	0.6622	80.96%	19.82%	4.8502	1.8155	98.0428	0.5611	8.6435	35.33	9.0537	8.9867	51	25.03	0	0	0	0	0	0	0	0
8:24:03	Light	2-240C-1h	2	244.67	9.0228	36.88	0.6622	81.21%	19.83%	4.8525	1.8032	293.6553	0.5613	8.6452	35.33	9.0446	8.9863	51	25.1	0	0	0	0	0	0	0	0
8:24:18	Light	2-240C-1h	3	244.67	9.04454	36.97	0.6621	81.02%	19.83%	4.8517	1.8081	66.3501	0.5611	8.6471	35.34	9.0405	8.9814	51	25.1	0	0	0	0	0	0	0	0
8:27:57	Light	2-200C-2.5h	1	244.67	9.10255	37.2	0.6678	81.34%	20.21%	4.9447	1.9574	45.0585	0.5682	8.7027	35.57	9.1052	9.0608	51	25.03	0	0	0	0	0	0	0	0
8:28:07	Light	2-200C-2.5h	2	244.67	9.09911	37.19	0.6676	81.44%	20.22%	4.9473	1.9378	127.834	0.5687	8.6995	35.56	9.1017	9.0573	51	25.1	0	0	0	0	0	0	0	0
8:28:24	Light	2-200C-2.5h	3	244.67	9.09835	37.19	0.6677	81.42%	20.22%	4.9463	1.9402	153.8944	0.5687	8.6981	35.55	9.0943	9.0523	51	25.09	0	0	0	0	0	0	0	0
8:29:26	Light	2-260C-10min	1	244.67	9.03901	36.94	0.6617	81.00%	19.80%	4.8447	1.7983	1709.8258	0.5604	8.6455	35.34	9.0494	8.9929	51	25.06	0	0	0	0	0	0	0	0
8:29:43	Light	2-260C-10min	2	244.67	9.0344	36.92	0.6617	81.05%	19.80%	4.845	1.8081	192.4829	0.5604	8.6462	35.34	9.0327	8.9806	51	25.09	0	0	0	0	0	0	0	0
8:29:58	Light	2-260C-10min	3	244.67	9.04267	36.96	0.6617	80.96%	19.80%	4.8445	1.8057	71.6337	0.5604	8.6443	35.33	9.0431	8.9861	51	25.1	0	0	0	0	0	0	0	0
8:32:00	Light	1-20-2-8h	1	244.67	9.06884	37.07	0.6694	81.23%	20.16%	4.9315	1.9207	65.6802	0.5685	8.674	35.45	9.0644	9.0353	51	25.04	0	0	0	0	0	0	0	0
8:32:15	Light	1-20-2-8h	2	244.67	9.07777	37.1	0.6693	81.27%	20.18%	4.9378	1.8889	38.5949	0.5696	8.6692	35.43	9.0667	9.0348	51	25.09	0	0	0	0	0	0	0	0
8:32:33	Light	1-20-2-8h	3	244.67	9.07466	37.09	0.6694	81.26%	20.18%	4.9363	1.8986	8692.3242	0.5694	8.6696	35.43	9.0908	9.0368	51	25.08	0	0	0	0	0	0	0	0
8:39:07	Light	1-220-2h	1	244.67	9.06816	37.06	0.6662	81.15%	20.04%	4.9026	1.9182	203.3527	0.5661	8.6608	35.4	9.0673	9.0166	51	25.01	0	0	0	0	0	0	0	0
8:39:17	Light	1-220-2h	2	244.67	9.06454	37.05	0.6661	81.24%	20.05%	4.9049	1.9084	281.7031	0.5664	8.6598	35.39	9.0686	9.0115	51	25.1	0	0	0	0	0	0	0	0
8:39:33	Light	1-220-2h	3	244.67	9.06663	37.06	0.6662	81.17%	20.04%	4.9029	1.9158	85.5734	0.5658	8.6653	35.42	9.0563	9.0107	51	25.1	0	0	0	0	0	0	0	0
8:40:24	Light	1-220-2h	4	244.67	9.02385	36.88	0.659	80.94%	19.67%	4.8135	1.8448	67.0948	0.5568	8.6449	35.33	9.0179	8.9692	51	25.03	0	0	0	0	0	0	0	0
8:40:38	Light	2-260-20min	1	244.67	9.02089	36.87	0.6589	80.94%	19.66%	4.8111	1.8546	60.2097	0.5566	8.6433	35.33	9.0257	8.9695	51	25.1	0	0	0	0	0	0	0	0
8:40:53	Light	2-260-20min	2	244.67	9.02525	36.89	0.659	80.84%	19.65%	4.8081	1.8619	101.6562	0.5569	8.6331	35.28	9.0236	8.9731	51	25.1	0	0	0	0	0	0	0	0
8:52:08	Light	2-260-20min	1	244.67	8.99857	36.78	0.6564	81.01%	19.56%	4.7852	1.7812	282.7911	0.5546	8.6281	35.26	9.0011	8.9422	51	25.06	0	0	0	0	0	0	0	0
8:52:21	Light	2-260-20min	2	244.67	8.99733	36.77	0.6563	80.98%	19.54%	4.7819	1.7861	235.5921	0.5551	8.6151	35.21	8.995	8.9408	51	25.1	0	0	0	0	0	0	0	0
8:52:36	Light	2-260-20min	3	244.67	9.01003	36.83	0.6564	80.86%	19.55%	4.7823	1.7812	23.7389	0.555	8.6165	35.22	9.0091	8.9415	51	25.1	0	0	0	0	0	0	0	0
8:55:38	Light	2-240-1.5h	1	244.67	9.0312	36.91	0.6613	80.86%	19.74%	4.8291	1.8106	316.8025	0.5593	8.6337	35.29	9.0156	8.9853	51	25.04	0	0	0	0	0	0	0	0
8:55:51	Light	2-240-1.5h	2	244.67	9.03709	36.94	0.6612	80.83%	19.74%	4.83	1.7959	508.4604	0.5597	8.6303	35.27	9.0214	8.9744	51	25.1	0	0	0	0	0	0	0	0
8:56:06	Light	2-240-1.5h	3	244.67	9.01705	36.85	0.6612	81.03%	19.74%	4.8308	1.791	111.1378	0.5598	8.6302	35.27	9.0269	8.9537	51	25.1	0	0	0	0	0	0	0	0
9:00:01	Light	2-200-3h	1	244.67	9.09323	37.17	0.6677	81.46%	20.22%	4.9462	1.9427	169.1826	0.5684	8.702	35.57	9.0881	9.0563	51	25.03	0	0	0	0	0	0	0	0
9:00:13	Light	2-200-3h	2	244.67	9.08661	37.14	0.6676	81.58%	20.23%	4.9486	1.928	116.3746	0.5691	8.695	35.54	9.093	9.0514	51	25.09	0	0	0	0	0	0	0	0
9:00:28	Light	2-200-3h	3	244.67	9.09071	37.15	0.6676	81.46%	20.21%	4.9437	1.9304	77.2243	0.5688	8.6914	35.52	9.0922	9.0487	51	25.09	0	0	0	0	0	0	0	0
9:03:56	Light	2-260-40min	1	244.67	8.99092	36.75	0.6548	80.81%	19.45%	4.7576	1.7763	33.995	0.5524	8.6131	35.2	8.9807	8.9278	51	25.03	0	0	0	0	0	0	0	0
9:04:07	Light	2-260-40min	2	244.67	8.98203	36.71	0.6548	80.84%	19.43%	4.7544	1.7641	287.3018	0.553	8.5969	35.14	8.9745	8.9296	51	25.1	0	0	0	0	0	0	0	0
9:04:24	Light	2-260-40min	3	244.67	8.99277	36.75	0.6548	80.72%	19.43%	4.7531	1.7739	3151.4083	0.5529	8.5972	35.14	8.9892	8.9255	51	25.09	0	0	0	0	0	0	0	0
9:06:16	Light	2-160-4h	1	244.67	9.08717	37.14	0.6698	81.53%	20.28%	4.9625	1.8889	287.0116	0.5711	8.6901	35.52	9.1113	9.0516	51	25.03	0	0	0	0	0	0	0	0
9:06:29	Light	2-160-4h	2	244.67	9.0999	37.19	0.6698	81.50%	20.30%	4.9676	1.8668	38.3642	0.5716	8.6903	35.52	9.1	9.0654	51	25.1	0	0	0	0	0	0	0	0
9:06:45	Light	2-160-4h	3	244.67	9.09746	37.18	0.6698	81.54%	20.31%	4.9686	1.8595	130.6094	0.5722	8.684	35.49	9.1012	9.0598	51	25.1	0	0	0	0	0	0	0	0
9:10:03	Light	2-220-2.5h	1	244.67	9.05901	37.03	0.6661	81.24%	20.04%	4.9025	1.9109	48.5761	0.5662	8.6588	35.39	9.0539	9.0244	51	25.01	0	0	0	0	0	0	0	0
9:10:13	Light	2-220-2.5h	2	244.67	9.07877	37.11	0.6661	81.11%	20.05%	4.9049	1.8986	110.9335	0.5662	8.6627	35.41	9.055	9.0232	51	25.1	0	0	0	0	0	0	0	0
9:10:28	Light	2-220-2.5h	3	244.67	9.06032	37.03	0.666	81.28%	20.05%	4.9048	1.8986	44.4597	0.5665	8.6574	35.38	9.0672	9.0068	51	25.1	0	0	0	0	0	0	0	0
9:17:44	Light	2-260-50min	1	244.67	8.9807	36.71	0.6534	80.83%	19.39%	4.743	1.7298	72.8457	0.5512	8.6051	35.17	8.9782	8.9065	51	25.03	0	0	0	0	0	0	0	0
9:17:57	Light	2-260-50min	2	244.67	8.978	36.69	0.6533	80.83%	19.38%	4.7409	1.7396	17432.9046	0.5511	8.603	35.16	8.9668	8.9136	51	25.09	0	0	0	0	0	0	0	0
9:18:12	Light	2-260-50min	3	244.67	8.97512	36.68	0.6533	80.80%	19.36%	4.7376	1.7347	47.4727	0.551	8.5983	35.14	8.974	8.924	51	25.1	0	0	0	0	0	0	0	0
9:26:35	Light	2-240-2h	1	244.67	9.03094	36.91	0.6608	80.75%	19.70%	4.819	1.8179	44.1357	0.5582	8.6338	35.29	9.0229	8.9838	51	25.02	0	0	0	0	0	0	0	0
9:26:48	Light	2-240-2h	2	244.67	9.01773	36.86	0.6608	80.90%	19.70%	4.8207	1.8008	1605.0886	0.5588	8.6276	35.26	9.0304	8.9707	51	25.1	0	0	0	0	0	0	0	0
9:27:03	Light	2-240-2h	3	244.67	9.02757	36.9	0.6607	80.83%	19.70%	4.8209	1.7983	83.212	0.5586	8.6304	35.27	9.0244	8.9849	51	25.1	0	0	0	0	0	0	0	0
9:28:49	Light	2-260-1h	1	244.67	8.98551	36.73	0.1762	105.91%	6.85%	1.6768	0.0465	0.0254	0.1513	11.0825	45.3	8.9835	8.9835	51	25.05	0	0	0	0	0	0	0	0
9:29:10	Light	2-260-1h	2	244.67	8.96915	36.66	0.6524	80.73%	19.31%	4.724	1.7421	379.1114	0.5496	8.5954	35.13	8.9626	8.9106	51	25.09	0	0	0	0	0	0	0	0
9:29:29	Light	2-260-1h	3	244.67	8.98775	36.73	0.6523	80.53%	19.30%	4.7213	1.7445	127.5099	0.5495	8.5915	35.11	8.9699	8.9098	51	25.07	0	0	0	0	0	0	0	0
9:29:44	Light	2-260-1h	4	244.67	8.97225	36.67	0.6523	80.72%	19.31%	4.7244	1.7323	44.8349	0.5497	8.5939	35.12	8.9805	8.9	51	25.1	0	0	0	0	0	0	0	0
9:32:08	Light	1-20-2-9h	1	244.67	9.07395	37.09	0.6694	81.12%	20.14%	4.9271	1.9304	221.6573	0.5681	8.6727	35.45	9.0755	9.0334	51	25.03	0	0	0	0	0	0	0	0
9:32:21	Light	1-20-2-9h	2	244.67	9.07423	37.09	0.6693	81.34%	20.19%	4.94	1.8791	110.9218	0.5699	8.6685	35.43	9.0737	9.0324	51	25.09	0	0	0	0	0	0	0	0
9:32:37	Light	1-20-2-9h	3	244.67	9.07932	37.11	0.6693	81.30%	20.19%	4.9403	1.8766	69.5724	0.5699	8.6681	35.43	9.077	9.0256	51	25.09	0	0	0	0	0	0	0	0
9:41:40	Light	2-220C-3h	1	244.67	9.05177	37	0.666	81.22%	20.01%	4.8965	1.9133	42.5416	0.5658	8.6542	35.37	9.073	9.0174	51	25.02	0	0	0	0	0	0	0	0
9:41:48	Light	2-220C-3h	2	244.67	9.05494	37.01	0.6659	81.22%	20.02%	4.8972	1.9109	124.9732	0.5658	8.6561	35.38	9.0573	9.0145	51	25.1	0	0	0	0	0	0	0	0
9:42:11	Light	2-220C-3h	3	244.67	9.05974	37.03	0.6659	81.18%	20.02%	4.8975	1.9084	137.7229	0.5655	8.66	35.39	9.0639	9.0186	51	25.05	0	0	0	0	0	0	0	0
9:57:53	Light	2-240C-2.5h	1	244.67	9.00819	36.82	0.6605	80.82%	19.65%	4.8087	1.7983	65.5414	0.5582	8.6148	35.21	9.0181	8.9605	51	25.04	0	0	0	0	0	0	0	0
9:58:06	Light	2-240C-2.5h	2	244.67	9.02055	36.87	0.6604	80.73%	19.66%	4.8092	1.791	316.8088	0.5583	8.6137	35.21	9.0146	8.9596	51	25.1	0	0	0	0	0	0	0	0
9:58:23	Light	2-240C-2.5h	3	244.67	9.00987	36.82	0.6604	80.84%	19.66%	4.8104	1.7885	60.5828	0.5583	8.616	35.21	9.0174	8.9715	51	25.1	0	0	0	0	0	0	0	0
10:00:19	Light	2-260C-1.5h	1	244.67	8.96945	36.66	0.1634	101.11%	6.06%	1.4818	13.4568	0.0185	0.1371	10.8116	44.19	7.3068	7.3068	51	25.06	0	0	0	0	0	0	0	0
10:00:27	Light	2-260C-1.5h	2	244.67	8.95788	36.61	0.1633	101.45%	6.07%	1.484	34.1364	0.0185	0.1371	10.8269	44.25	7.1829	7.1829	51	25.15405	0	0	0	0	0	0	0	0
10:01:01	Light	2-260C-1.5h	3	244.67	8.93752	36.53	0.6506	80.55%	19.14%	4.684	1.7249	169.7265	0.5473	8.5584	34.98	8.9435	8.8564	51	25.1	0	0	0	0	0	0	0	0
10:01:19	Light	2-260C-1.5h	4	244.67	8.94735	36.57	0.6505	80.50%	19.15%	4.6852	1.7176	55.6572	0.5473	8.5605	34.99	8.9344	8.868	51	25.1	0	0	0	0	0	0	0	0
10:01:38	Light	2-260C-1.5h	5	244.67	8.9337	36.51	0.6504	80.61%	19.14%	4.6841	1.7151	84.7792	0.5473	8.558	34.98	8.9428	8.8591	51	25.1	0	0	0	0	0	0	0	0
10:02:56	Light	2-200C-4h	1	244.67	9.07429	37.09	0.6672	81.35%	20.13%	4.9255	1.9427	45.588	0.5679	8.6729	35.45	9.0717	9.0282	51	25.09	0	0	0	0	0	0	0	0
10:03:17	Light	2-200C-4h	2	244.67	9.07454	37.09	0.6674	81.29%	20.12%	4.9231	1.9476	130.2467	0.5677	8.6718	35.44	9.0805	9.0323	51	25.09	0	0	0	0	0	0	0	0
10:03:34	Light	2-200C-4h	3	244.67	9.07371	37.09	0.6673	81.38%	20.14%	4.9276	1.9378	1189.6172	0.5681	8.6741	35.45	9.0783	9.0206	51	25.1	0	0	0	0	0	0	0	0
10:07:24	Light	2-160C-5h	1	244.67	9.07772	37.1	0.6698	81.70%	20.30%	4.9674	1.8644	63.268	0.572	8.6837	35.49	9.0875	9.0482	51	25.02	0	0	0	0	0	0	0	0
10:07:34	Light	2-160C-5h	2	244.67	9.09328	37.17	0.6698	81.55%	20.30%	4.9672	1.857	52.5475	0.572	8.6833	35.49	9.097	9.0465	51	25.1	0	0	0	0	0	0	0	0
10:07:49	Light	2-160C-5h	3	244.67	9.09749	37.18	0.6698	81.43%	20.28%	4.9616	1.8766	33.1192	0.5714	8.6826	35.49	9.0831	9.0476	51	25.1	0	0	0	0	0	0	0	0
10:28:51	Light	2-240C-3h	1	244.67	9.0254	36.89	0.6602	80.70%	19.65%	4.8084	1.7885	26.9274	0.5578	8.6204	35.23	9.0085	8.9615	51	25.05	0	0	0	0	0	0	0	0
10:29:06	Light	2-240C-3h	2	244.67	9.01897	36.86	0.6602	80.77%	19.66%	4.8093	1.7885	343.6642	0.558	8.6189	35.23	9.0085	8.9586	51	25.1	0	0	0	0	0	0	0	0
10:29:23	Light	2-240C-3h	3	244.67	9.0141	36.84	0.6602	80.81%	19.66%	4.8091	1.7836	316.7572	0.5578	8.6218	35.24	9.0155	8.9541	51	25.1	0	0	0	0	0	0	0	0
10:32:08	Light	2-260C-2h	1	244.67	8.95932	36.62	0.0148	101.34%	0.55%	0.1344	0.1003	0.0024	0.015	8.9526	36.59	8.9526	8.9526	51	25.07	0	0	0	0	0	0	0	0
10:32:29	Light	2-260C-2h	2	244.67	8.96219	36.63	0.0149	101.60%	0.55%	0.1357	0.0758	0.0024	0.0152	8.9454	36.56	8.9454	8.9454	51	25.1	0	0	0	0	0	0	0	0
10:32:53	Light	2-260C-2h	3	244.67	8.96188	36.63	0.0151	101.39%	0.56%	0.1372	0.0685	0.0024	0.0153	8.9496	36.58	8.9496	8.9496	51	25.09	0	0	0	0	0	0	0	0
10:33:46	Light	2-260C-2h	4	244.67	8.94535	36.56	0.6497	80.56%	19.13%	4.6817	1.6931	47.906	0.5469	8.5603	34.99	8.9445	8.8635	51	25.08	0	0	0	0	0	0	0	0
10:34:06	Light	2-260C-2h	5	244.67	8.93329	36.51	0.6498	80.65%	19.13%	4.6816	1.6882	66.7372	0.5471	8.5566	34.97	8.9307	8.8535	51	25.1	0	0	0	0	0	0	0	0
10:34:25	Light	2-260C-2h	6	244.67	8.93921	36.54	0.6497	80.59%	19.13%	4.6803	1.6858	359.3723	0.5471	8.5544	34.96	8.9445	8.8582	51	25.09	0	0	0	0	0	0	0	0
10:35:51	Light	1-20-10h	1	244.67	9.06708	37.06	0.6691	81.29%	20.16%	4.9315	1.8889	62.7641	0.5691	8.6657	35.42	9.0686	9.0253	51	25.07	0	0	0	0	0	0	0	0
10:36:08	Light	1-20-10h	2	244.67	9.07259	37.08	0.6691	81.25%	20.16%	4.9324	1.8742	20.9645	0.5696	8.6594	35.39	9.0639	9.0271	51	25.1	0	0	0	0	0	0	0	0
10:36:15	Light	1-20-10h	3	244.67	9.06389	37.05	0.6691	81.42%	20.18%	4.9376	1.857	40.4884	0.5703	8.658	35.39	9.0545	9.0237	51	25.1	0	0	0	0	0	0	0	0
10:44:42	Light	2-220C-4H	1	244.67	9.04672	36.98	0.6659	81.13%	19.97%	4.8872	1.9207	65.1804	0.5653	8.6446	35.33	9.0389	9.0056	51	25.02	0	0	0	0	0	0	0	0
10:44:52	Light	2-220C-4H	2	244.67	9.05175	37	0.6658	81.12%	19.98%	4.8886	1.9109	156.236	0.5652	8.6488	35.35	9.0423	9.0094	51	25.1	0	0	0	0	0	0	0	0
10:45:07	Light	2-220C-4H	3	244.67	9.04587	36.97	0.6658	81.18%	19.98%	4.8893	1.9084	39.6432	0.5653	8.6494	35.35	9.0528	9.0057	51	25.1	0	0	0	0	0	0	0	0
11:04:20	Light	2-260C-2.5H	1	244.67	8.95426	36.6	0.0144	101.91%	0.54%	0.1314	0.1174	0.0023	0.0147	8.9353	36.52	8.9353	8.9353	51	25.05	0	0	0	0	0	0	0	0
11:05:08	Light	2-260C-2.5H	2	244.67	8.80362	35.98	0.0033	99.11%	0.12%	0.0288	29.5537	0.0019	0.0038	7.647	31.25	7.647	7.647	51	25.05	0	0	0	0	0	0	0	0
11:05:29	Light	2-260C-2.5H	3	244.67	8.79283	35.94	0.0034	98.55%	0.12%	0.0295	25.7197	0.0019	0.0038	7.7048	31.49	7.7048	7.7048	51	25.09	0	0	0	0	0	0	0	0
11:06:42	Light	2-260C-2.5H	4	244.67	8.93182	36.51	0.6492	80.79%	19.15%	4.6848	1.6466	26.204	0.5468	8.5675	35.02	8.9394	8.8677	51	25.06	0	0	0	0	0	0	0	0
11:06:59	Light	2-260C-2.5H	5	244.67	8.9318	36.51	0.6492	80.67%	19.12%	4.6775	1.6638	94.466	0.547	8.5513	34.95	8.928	8.8467	51	25.1	0	0	0	0	0	0	0	0
11:07:16	Light	2-260C-2.5H	6	244.67	8.93556	36.52	0.6492	80.60%	19.11%	4.6755	1.6662	315.2216	0.5468	8.5512	34.95	8.9289	8.8461	51	25.1	0	0	0	0	0	0	0	0
11:08:33	Light	2-200C-5H	1	244.67	9.09443	37.17	0.6672	81.25%	20.15%	4.93	1.9476	33.9703	0.5677	8.6844	35.49	9.082	9.0398	51	25.07	0	0	0	0	0	0	0	0
11:08:52	Light	2-200C-5H	2	244.67	9.08401	37.13	0.6672	81.39%	20.16%	4.9331	1.9427	77.0537	0.5679	8.6861	35.5	9.0806	9.0448	51	25.1	0	0	0	0	0	0	0	0
11:09:10	Light	2-200C-5H	3	244.67	9.08325	37.12	0.6672	81.38%	20.16%	4.9317	1.928	104.0032	0.5682	8.6794	35.47	9.0957	9.0405	51	25.1	0	0	0	0	0	0	0	0
11:10:37	Light	2-160C-6H	1	244.67	9.08994	37.15	0.6695	81.48%	20.27%	4.9587	1.8619	1157.7283	0.5712	8.6811	35.48	9.0769	9.0502	51	25.07	0	0	0	0	0	0	0	0
11:10:54	Light	2-160C-6H	2	244.67	9.07138	37.08	0.6695	81.62%	20.26%	4.9568	1.8595	376.4808	0.5715	8.6725	35.45	9.0971	9.049	51	25.1	0	0	0	0	0	0	0	0
11:11:13	Light	2-160C-6H	3	244.67	9.08472	37.13	0.6694	81.50%	20.26%	4.9562	1.8619	66.8652	0.5712	8.6762	35.46	9.0794	9.0426	51	25.08	0	0	0	0	0	0	0	0
11:30:32	Light	2-240C-4H	1	244.67	9.00769	36.82	0.6599	80.73%	19.61%	4.7986	1.7739	815.829	0.5576	8.6052	35.17	9.0062	8.9519	51	25.05	0	0	0	0	0	0	0	0
11:30:50	Light	2-240C-4H	2	244.67	9.00932	36.82	0.6599	80.73%	19.62%	4.7995	1.7788	457.0493	0.5572	8.6137	35.21	9.0087	8.9506	51	25.1	0	0	0	0	0	0	0	0
11:31:07	Light	2-240C-4H	3	244.67	8.99518	36.76	0.6597	80.82%	19.60%	4.7961	1.7788	47.6709	0.5575	8.603	35.16	9.0048	8.9449	51	25.1	0	0	0	0	0	0	0	0
11:32:45	Light	1-20-11H	1	244.67	9.04934	36.99	0.669	81.15%	20.08%	4.9127	1.9011	45.3492	0.5683	8.645	35.33	9.0512	9.0199	51	25.07	0	0	0	0	0	0	0	0
11:33:02	Light	1-20-11H	2	244.67	9.05026	36.99	0.6691	81.14%	20.08%	4.9137	1.8962	68.0918	0.5685	8.6425	35.32	9.0371	9.0034	51	25.1	0	0	0	0	0	0	0	0
11:33:19	Light	1-20-11H	3	244.67	9.04522	36.97	0.669	81.14%	20.07%	4.9098	2.0332	102.1375	0.5682	8.6402	35.31	9.0558	9.013	51	25.1	0	0	0	0	0	0	0	0
11:38:00	Light	2-260C-3H	1	244.67	8.91347	36.43	0.649	80.73%	19.09%	4.6701	1.6466	311.644	0.5471	8.5358	34.89	8.9267	8.8422	51	25.04	0	0	0	0	0	0	0	0
11:38:12	Light	2-260C-3H	2	244.67	8.91729	36.45	0.6489	80.73%	19.09%	4.6715	1.7323	55.3816	0.5471	8.5388	34.9	8.9145	8.8386	51	25.1	0	0	0	0	0	0	0	0
11:38:28	Light	2-260C-3H	3	244.67	8.91495	36.44	0.6489	80.75%	19.09%	4.6713	1.7372	83.6536	0.5472	8.5364	34.89	8.9198	8.836	51	25.1	0	0	0	0	0	0	0	0
11:46:19	Light	2-220C-5H	1	244.67	9.05718	37.02	0.6656	81.07%	19.98%	4.8873	1.9158	76.1083	0.5647	8.654	35.37	9.0524	8.9984	51	25.03	0	0	0	0	0	0	0	0
11:46:31	Light	2-220C-5H	2	244.67	9.04178	36.96	0.6656	81.23%	19.98%	4.8886	1.906	93.3073	0.565	8.6529	35.37	9.0551	9.0182	51	25.09	0	0	0	0	0	0	0	0
11:46:47	Light	2-220C-5H	3	244.67	9.04985	36.99	0.6656	81.10%	19.97%	4.8854	1.9109	109.7357	0.5648	8.6502	35.35	9.0473	9.0016	51	25.1	0	0	0	0	0	0	0	0
12:10:41	Light	2-200C-6H	1	244.67	9.08862	37.15	0.6672	81.41%	20.18%	4.9367	1.9256	669.7265	0.5683	8.6865	35.5	9.0945	9.0389	51	25.05	0	0	0	0	0	0	0	0
12:10:56	Light	2-200C-6H	2	244.67	9.09145	37.16	0.6672	81.37%	20.17%	4.9358	1.9304	120.9296	0.5681	8.6876	35.51	9.0888	9.0488	51	25.1	0	0	0	0	0	0	0	0
12:11:13	Light	2-200C-6H	3	244.67	9.0976	37.18	0.6672	81.29%	20.17%	4.9343	1.9304	55.0853	0.5679	8.6881	35.51	9.0831	9.0471	51	25.1	0	0	0	0	0	0	0	0
12:12:16	Light	2-160C-7H	1	244.67	9.09342	37.17	0.6694	81.49%	20.27%	4.9603	1.8644	51.0033	0.5709	8.6883	35.51	9.091	9.0556	51	25.09	0	0	0	0	0	0	0	0
12:12:35	Light	2-160C-7H	2	244.67	9.10241	37.2	0.6694	81.50%	20.30%	4.9662	1.8399	44.7735	0.5717	8.6866	35.5	9.0836	9.0395	51	25.09	0	0	0	0	0	0	0	0
12:12:52	Light	2-160C-7H	3	244.67	9.09067	37.15	0.6693	81.58%	20.29%	4.9638	1.8399	104.3516	0.5717	8.6831	35.49	9.092	9.0597	51	25.1	0	0	0	0	0	0	0	0
12:33:01	Light	1-20-12H	1	244.67	9.07403	37.09	0.669	81.25%	20.16%	4.9323	1.8742	104.6327	0.5695	8.6613	35.4	9.0699	9.0212	51	25.05	0	0	0	0	0	0	0	0
12:33:19	Light	1-20-12H	2	244.67	9.0804	37.11	0.6691	81.18%	20.16%	4.9323	1.8693	93.0796	0.5696	8.6599	35.39	9.0684	9.0262	51	25.1	0	0	0	0	0	0	0	0
12:33:36	Light	1-20-12H	3	244.67	9.06934	37.07	0.669	81.28%	20.16%	4.9319	1.999	312.9078	0.5694	8.6613	35.4	9.0683	9.0252	51	25.1	0	0	0	0	0	0	0	0
12:35:24	Light	2-240-5H	1	244.67	9.00474	36.8	0.6596	80.76%	19.60%	4.7966	1.7739	77.5847	0.557	8.6117	35.2	9.016	8.9544	51	25.08	0	0	0	0	0	0	0	0
12:35:43	Light	2-240-5H	2	244.67	9.01063	36.83	0.6596	80.70%	19.60%	4.7963	1.7739	90.9658	0.557	8.6107	35.19	9.0014	8.9428	51	25.1	0	0	0	0	0	0	0	0
12:36:02	Light	2-240-5H	3	244.67	9.01054	36.83	0.6595	80.71%	19.60%	4.7964	1.7739	1726.4466	0.5565	8.6182	35.22	9.0046	8.9566	51	25.09	0	0	0	0	0	0	0	0
12:38:56	Light	2-260-4H	1	244.67	8.90783	36.41	0.6484	80.70%	19.05%	4.661	1.7396	304.8832	0.5464	8.5312	34.87	8.9204	8.8301	51	25.07	0	0	0	0	0	0	0	0
12:39:13	Light	2-260-4H	2	244.67	8.91326	36.43	0.6483	80.72%	19.06%	4.6645	1.7347	42.2243	0.5458	8.5465	34.93	8.9016	8.8328	51	25.09	0	0	0	0	0	0	0	0
12:39:27	Light	2-260-4H	3	244.67	8.91374	36.43	0.6484	80.69%	19.06%	4.6637	1.7274	289.8077	0.5465	8.5341	34.88	8.9156	8.8416	51	25.09771	0	0	0	0	0	0	0	0
12:47:27	Light	2-220-6H	1	244.67	9.06252	37.04	0.6655	80.95%	19.95%	4.8819	1.928	3103.4104	0.5643	8.6508	35.36	9.04	9.0189	51	25.04	0	0	0	0	0	0	0	0
12:47:40	Light	2-220-6H	2	244.67	9.05307	37	0.6655	81.04%	19.96%	4.8825	1.9158	69.8585	0.5647	8.6461	35.34	9.0589	9.0052	51	25.1	0	0	0	0	0	0	0	0
12:47:55	Light	2-220-6H	3	244.67	9.05473	37.01	0.6655	81.05%	19.96%	4.8841	1.9182	86.4211	0.5644	8.6541	35.37	9.0463	8.9965	51	25.1	0	0	0	0	0	0	0	0
13:11:58	Light	2-200-7H	1	244.67	9.09854	37.19	0.6671	81.28%	20.16%	4.9333	1.95	66.1684	0.5673	8.6961	35.54	9.087	9.0635	51	25.07	0	0	0	0	0	0	0	0
13:12:15	Light	2-200-7H	2	244.67	9.08459	37.13	0.6672	81.43%	20.17%	4.9358	1.9329	137.5223	0.5678	8.6929	35.53	9.0853	9.0522	51	25.1	0	0	0	0	0	0	0	0
13:12:32	Light	2-200-7H	3	244.67	9.09154	37.16	0.6671	81.40%	20.18%	4.9369	1.9304	194.7385	0.5674	8.7007	35.56	9.1003	9.0551	51	25.1	0	0	0	0	0	0	0	0
13:13:49	Light	2-160-8H	1	244.67	9.09604	37.18	0.6692	81.46%	20.27%	4.9588	1.8619	44.05	0.5706	8.6906	35.52	9.0785	9.0546	51	25.09	0	0	0	0	0	0	0	0
13:14:09	Light	2-160-8H	2	244.67	9.08136	37.12	0.6692	81.64%	20.28%	4.9612	1.8473	218.1876	0.5712	8.686	35.5	9.0869	9.0565	51	25.1	0	0	0	0	0	0	0	0
13:14:33	Light	2-160-8H	3	244.67	9.07714	37.1	0.6692	81.67%	20.28%	4.9613	1.8473	48.246	0.5712	8.6857	35.5	9.0668	9.0477	51	25.08	0	0	0	0	0	0	0	0
13:37:09	Light	2-240-6H	1	244.67	9.00262	36.79	0.6595	80.62%	19.56%	4.7866	1.8032	124.4735	0.5562	8.6065	35.18	8.9962	8.9451	51	25.06	0	0	0	0	0	0	0	0
13:37:33	Light	2-240-6H	2	244.67	9.00383	36.8	0.6595	80.70%	19.59%	4.7919	1.7934	62.0981	0.556	8.6193	35.23	8.996	8.9534	51	25.05	0	0	0	0	0	0	0	0
13:37:48	Light	2-240-6H	3	244.67	8.98994	36.74	0.6594	80.76%	19.57%	4.7874	1.7861	258.332	0.5565	8.6029	35.16	8.999	8.9389	51	25.1	0	0	0	0	0	0	0	0
13:40:34	Light	2-260-5H	1	244.67	8.89427	36.35	0.6479	80.46%	18.95%	4.6368	1.7885	92.4833	0.5437	8.5276	34.85	8.8948	8.8092	51	25.08	0	0	0	0	0	0	0	0
13:40:53	Light	2-260-5H	2	244.67	8.89037	36.34	0.6478	80.45%	18.94%	4.6334	1.7885	122.2024	0.5443	8.5126	34.79	8.9009	8.8151	51	25.1	0	0	0	0	0	0	0	0
13:41:10	Light	2-260-5H	3	244.67	8.89451	36.35	0.6477	80.37%	18.92%	4.6301	1.791	79.5942	0.544	8.5105	34.78	8.9009	8.8074	51	25.1	0	0	0	0	0	0	0	0
13:49:17	Light	2-220-7H	1	244.67	9.04632	36.97	0.6654	80.90%	19.90%	4.8696	1.9353	95.6944	0.5635	8.6415	35.32	9.0442	8.991	51	25.05	0	0	0	0	0	0	0	0
13:49:32	Light	2-220-7H	2	244.67	9.03877	36.94	0.6653	81.03%	19.91%	4.8725	1.9207	847.3459	0.5639	8.6406	35.32	9.0308	8.9914	51	25.09	0	0	0	0	0	0	0	0
13:49:48	Light	2-220-7H	3	244.67	9.03816	36.94	0.6653	81.00%	19.91%	4.8705	1.9207	528.3785	0.5637	8.6398	35.31	9.0338	8.9866	51	25.1	0	0	0	0	0	0	0	0
14:12:49	Light	2-200-8H	1	244.67	9.0809	37.11	0.6671	81.30%	20.13%	4.9251	1.9525	525.3815	0.5667	8.6912	35.52	9.0982	9.0435	51	25.07	0	0	0	0	0	0	0	0
14:13:06	Light	2-200-8H	2	244.67	9.07938	37.11	0.6672	81.33%	20.14%	4.9269	1.9402	111.8725	0.5675	8.6815	35.48	9.0823	9.0492	51	25.09	0	0	0	0	0	0	0	0
14:13:23	Light	2-200-8H	3	244.67	9.08302	37.12	0.6671	81.31%	20.14%	4.9266	1.9329	164.4067	0.5676	8.6794	35.47	9.0837	9.0403	51	25.09	0	0	0	0	0	0	0	0
14:15:15	Light	2-160-9H	1	244.67	9.07277	37.08	0.6692	81.62%	20.25%	4.9557	1.8522	384.8234	0.5709	8.6809	35.48	9.0866	9.0605	51	25.08	0	0	0	0	0	0	0	0
14:15:34	Light	2-160-9H	2	244.67	9.08544	37.13	0.6692	81.46%	20.24%	4.9527	1.8595	123.67	0.5708	8.6765	35.46	9.079	9.0371	51	25.09	0	0	0	0	0	0	0	0
14:15:51	Light	2-160-9H	3	244.67	9.08723	37.14	0.6692	81.44%	20.24%	4.9527	1.8546	3786.0896	0.5708	8.6771	35.46	9.0758	9.0415	51	25.1	0	0	0	0	0	0	0	0
14:40:06	Light	2-240-7H	1	244.67	8.99142	36.75	0.6594	80.63%	19.54%	4.7804	1.7959	95.6163	0.5557	8.602	35.16	8.9782	8.9379	51	25.05	0	0	0	0	0	0	0	0
14:40:21	Light	2-240-7H	2	244.67	8.99211	36.75	0.6594	80.57%	19.53%	4.7774	1.8008	660.4263	0.5554	8.6018	35.16	8.9887	8.9208	51	25.1	0	0	0	0	0	0	0	0
14:40:38	Light	2-240-7H	3	244.67	8.99482	36.76	0.6594	80.50%	19.51%	4.7744	1.7959	90.5013	0.5559	8.5878	35.1	8.9861	8.9265	51	25.1	0	0	0	0	0	0	0	0
14:42:25	Light	2-260-6H	1	244.67	8.92111	36.46	0.6378	114.34%	26.59%	6.5056	0.575	643.6504	0.6101	10.6637	43.58	8.9312	8.9197	51	25.09	0	0	0	0	0	0	0	0
14:42:50	Light	2-260-6H	2	244.67	8.90845	36.41	0.6475	80.44%	18.96%	4.64	1.7567	103.5436	0.5441	8.5281	34.86	8.8935	8.8122	51	25.1	0	0	0	0	0	0	0	0
14:43:07	Light	2-260-6H	3	244.67	8.90244	36.39	0.6475	80.46%	18.96%	4.638	1.7469	79.3978	0.5448	8.5135	34.8	8.8922	8.8081	51	25.1	0	0	0	0	0	0	0	0
14:43:29	Light	2-260-6H	4	244.67	8.89631	36.36	0.6474	80.58%	18.97%	4.6409	1.7372	88.9873	0.545	8.5156	34.8	8.8958	8.8239	51	25.1	0	0	0	0	0	0	0	0
14:51:14	Light	2-220-8H	1	244.67	9.03891	36.94	0.6654	81.01%	19.91%	4.8722	1.9231	188.1926	0.5643	8.6346	35.29	9.0443	8.989	51	25.03	0	0	0	0	0	0	0	0
14:51:25	Light	2-220-8H	2	244.67	9.04028	36.95	0.6653	81.05%	19.92%	4.875	1.9109	150.0512	0.5641	8.6415	35.32	9.0474	8.9866	51	25.1	0	0	0	0	0	0	0	0
14:51:40	Light	2-220-8H	3	244.67	9.03527	36.93	0.6653	81.06%	19.92%	4.8727	1.9158	87.0703	0.5639	8.6411	35.32	9.0286	8.994	51	25.1	0	0	0	0	0	0	0	0
15:14:09	Light	2-200-9H	1	244.67	9.08142	37.12	0.667	81.30%	20.13%	4.9245	1.9427	208.5329	0.5673	8.6806	35.48	9.0797	9.0398	51	25.06	0	0	0	0	0	0	0	0
15:14:26	Light	2-200-9H	2	244.67	9.07633	37.1	0.667	81.33%	20.12%	4.9234	1.9402	282.1627	0.5673	8.6792	35.47	9.0753	9.0397	51	25.1	0	0	0	0	0	0	0	0
15:14:43	Light	2-200-9H	3	244.67	9.09206	37.16	0.6669	81.24%	20.13%	4.9259	1.9304	524.9778	0.5676	8.678	35.47	9.0897	9.0508	51	25.1	0	0	0	0	0	0	0	0
15:16:14	Light	2-160-10H	1	244.67	9.08232	37.12	0.6691	81.56%	20.26%	4.9565	1.8424	130.2992	0.5709	8.6825	35.49	9.0869	9.0484	51	25.08	0	0	0	0	0	0	0	0
15:16:34	Light	2-160-10H	2	244.67	9.09216	37.16	0.6691	81.42%	20.24%	4.9531	1.8522	577.4871	0.5705	8.6821	35.48	9.0793	9.0415	51	25.1	0	0	0	0	0	0	0	0
15:16:53	Light	2-160-10H	3	244.67	9.0707	37.07	0.6691	81.64%	20.25%	4.9546	1.8424	43.488	0.5709	8.6782	35.47	9.0803	9.0428	51	25.1	0	0	0	0	0	0	0	0
15:41:01	Light	2-240-8H	1	244.67	8.99904	36.78	0.6593	80.52%	19.53%	4.7774	1.7959	1734.8343	0.5559	8.5947	35.13	9.0046	8.9382	51	25.06	0	0	0	0	0	0	0	0
15:41:19	Light	2-240-8H	2	244.67	8.994	36.76	0.6593	80.49%	19.51%	4.7728	1.8032	225.6837	0.5556	8.5906	35.11	8.9905	8.9334	51	25.1	0	0	0	0	0	0	0	0
15:41:36	Light	2-240-8H	3	244.67	8.99478	36.76	0.6592	80.55%	19.52%	4.7761	1.7983	191.4006	0.5552	8.6032	35.16	8.9839	8.9358	51	25.1	0	0	0	0	0	0	0	0
15:44:26	Light	2-260-7H	1	244.67	8.89344	36.35	0.6473	80.56%	18.95%	4.6375	1.7372	645.8935	0.5448	8.5118	34.79	8.8832	8.797	51	25.07	0	0	0	0	0	0	0	0
15:44:44	Light	2-260-7H	2	244.67	8.89291	36.35	0.6473	80.32%	18.90%	4.6237	1.7788	335.1154	0.5431	8.5143	34.8	8.8891	8.7907	51	25.1	0	0	0	0	0	0	0	0
15:45:01	Light	2-260-7H	3	244.67	8.88813	36.33	0.6472	80.38%	18.90%	4.624	1.7665	146.5392	0.5439	8.502	34.75	8.8925	8.7943	51	25.1	0	0	0	0	0	0	0	0
15:52:20	Light	2-220-9H	1	244.67	9.04752	36.98	0.6652	81.00%	19.93%	4.8751	1.906	75.1672	0.564	8.6431	35.33	9.0581	9.0013	51	25.04	0	0	0	0	0	0	0	0
15:52:33	Light	2-220-9H	2	244.67	9.03349	36.92	0.6652	81.08%	19.91%	4.8721	1.9109	74.1008	0.5641	8.6364	35.3	9.0565	8.9964	51	25.1	0	0	0	0	0	0	0	0
15:52:50	Light	2-220-9H	3	244.67	9.04232	36.96	0.6652	80.97%	19.90%	4.8701	1.9109	607.9067	0.5641	8.6327	35.28	9.0508	8.9848	51	25.09	0	0	0	0	0	0	0	0
16:14:54	Light	2-200-10H	1	244.67	9.07996	37.11	0.6669	81.28%	20.12%	4.9218	1.9451	54.6617	0.567	8.68	35.48	9.0852	9.0349	51	25.06	0	0	0	0	0	0	0	0
16:15:11	Light	2-200-10H	2	244.67	9.07891	37.11	0.6669	81.31%	20.12%	4.9231	1.9329	71.1272	0.5672	8.6792	35.47	9.0709	9.0272	51	25.1	0	0	0	0	0	0	0	0
16:15:28	Light	2-200-10H	3	244.67	9.07604	37.1	0.6668	81.31%	20.11%	4.9211	1.9304	346.1918	0.5673	8.6742	35.45	9.0834	9.0219	51	25.1	0	0	0	0	0	0	0	0
16:18:07	Light	2-160-11H	1	244.67	9.07678	37.1	0.6691	81.58%	20.25%	4.9548	1.857	112.3892	0.5705	8.6854	35.5	9.0968	9.0513	51	25.08	0	0	0	0	0	0	0	0
16:18:26	Light	2-160-11H	2	244.67	9.08796	37.14	0.669	81.47%	20.25%	4.9534	1.8497	131.6345	0.5707	8.6795	35.47	9.0809	9.0595	51	25.1	0	0	0	0	0	0	0	0
16:18:44	Light	2-160-11H	3	244.67	9.08585	37.14	0.669	81.49%	20.25%	4.9534	1.8448	1119.3324	0.5707	8.6795	35.47	9.0814	9.0404	51	25.1	0	0	0	0	0	0	0	0
16:42:38	Light	2-240-9H	1	244.67	8.98892	36.74	0.6592	80.52%	19.50%	4.771	1.8008	108.6017	0.5556	8.5875	35.1	8.9908	8.9292	51	25.06	0	0	0	0	0	0	0	0
16:42:55	Light	2-240-9H	2	244.67	8.99599	36.77	0.6591	80.49%	19.51%	4.7727	1.9084	44.198	0.5552	8.5965	35.14	8.9783	8.923	51	25.1	0	0	0	0	0	0	0	0
16:43:12	Light	2-240-9H	3	244.67	8.9864	36.73	0.6591	80.53%	19.49%	4.7697	1.9035	4518.0484	0.5556	8.5853	35.09	8.9936	8.923	51	25.1	0	0	0	0	0	0	0	0
16:46:33	Light	2-260-8H	1	244.67	8.82608	36.07	0.0036	105.56%	0.14%	0.0335	40.7473	0.0019	0.0041	8.242	33.69	8.242	8.242	51	25.07	0	0	0	0	0	0	0	0
16:46:56	Light	2-260-8H	2	244.67	8.82987	36.09	0.0036	106.64%	0.14%	0.0339	27.0311	0.0019	0.0041	8.3095	33.96	8.3095	8.3095	51	25.08	0	0	0	0	0	0	0	0
16:47:48	Light	2-260-8H	3	244.67	8.84513	36.15	0.0037	104.42%	0.14%	0.0342	37.1385	0.0019	0.0041	8.3743	34.23	8.3743	8.3743	51	25.08	0	0	0	0	0	0	0	0
16:48:10	Light	2-260-8H	4	244.67	8.84372	36.15	0.0037	105.06%	0.14%	0.0344	45.0853	0.0019	0.0041	8.3843	34.27	8.3843	8.3843	51	25.1	0	0	0	0	0	0	0	0
16:49:11	Light	2-260-8H	5	244.67	8.88081	36.3	0.6471	81.01%	19.03%	4.6555	1.6613	139.4012	0.5472	8.5079	34.77	8.8836	8.8144	51	25.08	0	0	0	0	0	0	0	0
16:49:28	Light	2-260-8H	6	244.67	8.88495	36.31	0.6471	80.75%	18.98%	4.6428	1.698	35.9215	0.5461	8.5018	34.75	8.8827	8.8008	51	25.09	0	0	0	0	0	0	0	0
16:49:45	Light	2-260-8H	7	244.67	8.88665	36.32	0.6471	80.64%	18.95%	4.6372	1.7053	437.2806	0.5457	8.4984	34.73	8.8708	8.7947	51	25.09	0	0	0	0	0	0	0	0
16:54:02	Light	2-220-10H	1	244.67	9.02111	36.87	0.6654	81.11%	19.90%	4.8687	1.9158	2530.0485	0.5643	8.6273	35.26	9.0513	8.9914	51	25.03	0	0	0	0	0	0	0	0
16:54:12	Light	2-220-10H	2	244.67	9.02461	36.88	0.6652	81.08%	19.89%	4.8672	1.9109	3175.3201	0.5639	8.6309	35.28	9.0267	8.9864	51	25.1	0	0	0	0	0	0	0	0
16:54:27	Light	2-220-10H	3	244.67	9.03693	36.94	0.6651	80.96%	19.89%	4.8662	1.9133	118.4006	0.5637	8.6326	35.28	9.0411	8.9962	51	25.1	0	0	0	0	0	0	0	0
17:16:27	Light	2-200-11H	1	244.67	9.08679	37.14	0.6669	81.24%	20.12%	4.9232	1.9476	1182.6081	0.5665	8.6904	35.52	9.0876	9.041	51	25.04	0	0	0	0	0	0	0	0
17:16:42	Light	2-200-11H	2	244.67	9.08946	37.15	0.6669	81.21%	20.12%	4.9226	1.9451	56.5483	0.5669	8.6827	35.49	9.0859	9.0277	51	25.1	0	0	0	0	0	0	0	0
17:16:59	Light	2-200-11H	3	244.67	9.07865	37.11	0.6668	81.31%	20.12%	4.9225	1.9353	74.2853	0.567	8.6816	35.48	9.0803	9.0345	51	25.09	0	0	0	0	0	0	0	0
17:19:25	Light	2-160-12H	1	244.67	9.08075	37.11	0.6691	81.47%	20.23%	4.9503	1.8424	66.3338	0.5708	8.6728	35.45	9.0825	9.0428	51	25.07	0	0	0	0	0	0	0	0
17:19:42	Light	2-160-12H	2	244.67	9.07988	37.11	0.669	81.38%	20.20%	4.9434	1.8644	77.2344	0.57	8.6727	35.45	9.0637	9.0177	51	25.1	0	0	0	0	0	0	0	0
17:19:59	Light	2-160-12H	3	244.67	9.08765	37.14	0.6689	81.40%	20.22%	4.9483	1.9818	121.7576	0.5703	8.6767	35.46	9.0692	9.0304	51	25.1	0	0	0	0	0	0	0	0
17:44:11	Light	2-240-10H	1	244.67	8.99828	36.78	0.6591	80.34%	19.47%	4.7646	1.9476	92.6137	0.554	8.601	35.15	8.9829	8.9223	51	25.06	0	0	0	0	0	0	0	0
17:44:26	Light	2-240-10H	2	244.67	8.98852	36.74	0.6592	80.41%	19.47%	4.7648	1.9256	70.8493	0.5548	8.5875	35.1	8.9789	8.937	51	25.1	0	0	0	0	0	0	0	0
17:44:45	Light	2-240-10H	3	244.67	8.99326	36.76	0.6591	80.37%	19.47%	4.7639	1.9329	69.0196	0.554	8.5993	35.15	8.9925	8.9294	51	25.09	0	0	0	0	0	0	0	0
17:50:19	Light	2-260-9H	1	244.67	8.89047	36.34	0.647	80.59%	18.95%	4.6357	1.7347	337.3512	0.5439	8.5236	34.84	8.8957	8.8	51	25.05	0	0	0	0	0	0	0	0
17:50:34	Light	2-260-9H	2	244.67	8.88951	36.33	0.647	80.47%	18.92%	4.628	1.7469	89.5459	0.5435	8.5157	34.8	8.8826	8.7944	51	25.1	0	0	0	0	0	0	0	0
17:50:51	Light	2-260-9H	3	244.67	8.89902	36.37	0.6469	80.34%	18.90%	4.625	1.7494	141.1896	0.5433	8.5128	34.79	8.8968	8.7951	51	25.09	0	0	0	0	0	0	0	0
17:55:22	Light	2-220-11H	1	244.67	9.05144	36.99	0.6652	81.04%	19.94%	4.8793	1.9035	79.2169	0.5641	8.6491	35.35	9.0389	8.9975	51	25.04	0	0	0	0	0	0	0	0
17:55:35	Light	2-220-11H	2	244.67	9.04993	36.99	0.6651	81.02%	19.93%	4.8768	1.8962	2073.4952	0.5644	8.64	35.31	9.0478	9.0033	51	25.1	0	0	0	0	0	0	0	0
17:55:50	Light	2-220-11H	3	244.67	9.0542	37.01	0.6651	80.99%	19.93%	4.8772	1.8913	124.9594	0.5647	8.6374	35.3	9.0473	8.9983	51	25.1	0	0	0	0	0	0	0	0
18:18:22	Light	2-200-12H	1	244.67	9.09262	37.16	0.6669	81.34%	20.16%	4.9322	1.9133	598.895	0.5678	8.6873	35.51	9.0827	9.0463	51	25.04	0	0	0	0	0	0	0	0
18:18:35	Light	2-200-12H	2	244.67	9.07554	37.09	0.6667	81.36%	20.12%	4.9228	1.9353	117.1134	0.5666	8.6885	35.51	9.084	9.041	51	25.1	0	0	0	0	0	0	0	0
18:18:52	Light	2-200-12H	3	244.67	9.08696	37.14	0.6668	81.25%	20.12%	4.9232	1.9329	45.8088	0.5671	8.6811	35.48	9.0884	9.0489	51	25.09	0	0	0	0	0	0	0	0
18:45:42	Light	2-240-11H	1	244.67	9.00535	36.81	0.659	80.46%	19.52%	4.775	1.9133	84.9706	0.5551	8.6017	35.16	8.9983	8.942	51	25.06	0	0	0	0	0	0	0	0
18:45:59	Light	2-240-11H	2	244.67	8.993	36.76	0.6591	80.62%	19.53%	4.7784	1.8913	233.6923	0.5558	8.5979	35.14	8.9945	8.9358	51	25.1	0	0	0	0	0	0	0	0
18:46:17	Light	2-240-11H	3	244.67	9.01282	36.84	0.659	80.47%	19.53%	4.7794	1.8913	32.1042	0.5551	8.6098	35.19	9	8.9352	51	25.1	0	0	0	0	0	0	0	0
18:51:31	Light	2-260-10H	1	244.67	8.8901	36.34	0.6469	80.65%	18.96%	4.6382	1.7298	120.8765	0.544	8.5268	34.85	8.8983	8.8169	51	25.05	0	0	0	0	0	0	0	0
18:51:46	Light	2-260-10H	2	244.67	8.88892	36.33	0.6468	80.67%	18.96%	4.638	1.7249	159.9761	0.5441	8.5246	34.84	8.8969	8.8135	51	25.1	0	0	0	0	0	0	0	0
18:52:01	Light	2-260-10H	3	244.67	8.8812	36.3	0.6467	80.74%	18.95%	4.637	1.7225	96.1145	0.5439	8.525	34.84	8.8972	8.8147	51	25.1	0	0	0	0	0	0	0	0
18:58:27	Light	2-220-12H	1	244.67	9.03553	36.93	0.665	80.95%	19.88%	4.8637	1.9207	295.0527	0.5638	8.6264	35.26	9.0281	8.9847	51	25.18224	0	0	0	0	0	0	0	0
18:59:20	Light	2-220-12H	2	244.67	9.0345	36.93	0.665	81.01%	19.89%	4.8669	1.9182	28.4256	0.5634	8.6382	35.31	9.0446	8.9857	51	25.1	0	0	0	0	0	0	0	0
18:59:47	Light	2-220-12H	3	244.67	9.03034	36.91	0.665	81.06%	19.89%	4.8676	1.9084	53.5635	0.5636	8.6367	35.3	9.0435	8.983	51	25.1	0	0	0	0	0	0	0	0
19:00:15	Light	2-220-12H	4	244.67	9.03312	36.92	0.6649	81.01%	19.89%	4.8657	1.906	698.2592	0.5636	8.6326	35.28	9.0271	8.9804	51	25.1	0	0	0	0	0	0	0	0
19:12:10	Light	3-6A-before	1	244.67	9.07917	37.11	0.6668	81.28%	20.11%	4.9207	1.9084	349.7962	0.5671	8.6773	35.47	9.0826	9.0467	51	25	0	0	0	0	0	0	0	0
19:12:22	Light	3-6A-before	2	244.67	9.08223	37.12	0.6664	81.12%	20.07%	4.9098	1.9084	66.7568	0.5662	8.6718	35.44	9.0854	9.0337	51	25.08	0	0	0	0	0	0	0	0
19:12:38	Light	3-6A-before	3	244.67	9.06904	37.07	0.6662	81.15%	20.04%	4.9029	1.9109	1249.3639	0.5655	8.6704	35.44	9.0739	9.0316	51	25.08	0	0	0	0	0	0	0	0
19:13:58	Light	3-8A-before	1	244.67	9.08746	37.14	0.667	81.59%	20.21%	4.9455	1.8546	53.6807	0.5698	8.6794	35.47	9.0884	9.0476	51	25.03	0	0	0	0	0	0	0	0
19:14:12	Light	3-8A-before	2	244.67	9.08426	37.13	0.667	81.46%	20.17%	4.9358	1.8815	71.17	0.569	8.675	35.46	9.0863	9.044	51	25.1	0	0	0	0	0	0	0	0
19:14:30	Light	3-8A-before	3	244.67	9.08531	37.13	0.6669	81.43%	20.17%	4.9339	1.8815	132.507	0.5687	8.6751	35.46	9.0811	9.0312	51	25.09	0	0	0	0	0	0	0	0
19:15:53	Light	3-12A-before	1	244.67	9.07566	37.09	0.6662	81.08%	20.04%	4.9023	1.8668	109.403	0.5669	8.6478	35.34	9.0704	9.028	51	25.04	0	0	0	0	0	0	0	0
19:16:10	Light	3-12A-before	2	244.67	9.07277	37.08	0.6661	80.96%	20.00%	4.8928	1.8864	45.7846	0.566	8.6446	35.33	9.0643	9.0255	51	25.09	0	0	0	0	0	0	0	0
19:16:27	Light	3-12A-before	3	244.67	9.06673	37.06	0.6659	81.01%	19.99%	4.8911	1.8766	204.0152	0.5657	8.6456	35.34	9.066	9.0267	51	25.1	0	0	0	0	0	0	0	0
19:17:07	Light	3-12A-before	4	244.67	9.08003	37.11	0.6682	81.62%	20.24%	4.9518	1.8815	65.8446	0.5712	8.6699	35.44	9.0774	9.0409	51	25.04	0	0	0	0	0	0	0	0
19:17:21	Light	3-14A-before	1	244.67	9.07779	37.1	0.6683	81.45%	20.20%	4.9416	1.9158	48.3018	0.5703	8.6642	35.41	9.078	9.0476	51	25.09339	0	0	0	0	0	0	0	0
19:17:39	Light	3-14A-before	2	244.67	9.07243	37.08	0.6683	81.47%	20.19%	4.9395	1.9207	66.1315	0.5702	8.6624	35.4	9.0841	9.0333	51	25.1	0	0	0	0	0	0	0	0
19:18:48	Light	3-16A-before	1	244.67	9.07499	37.09	0.6661	81.24%	20.07%	4.9111	1.8644	121.6922	0.5669	8.6635	35.41	9.0769	9.0457	51	25.03	0	0	0	0	0	0	0	0
19:19:14	Light	3-16A-before	2	244.67	9.07419	37.09	0.666	81.09%	20.03%	4.9006	1.8962	37.8766	0.5656	8.6641	35.41	9.0673	9.0194	51	25.02	0	0	0	0	0	0	0	0
19:19:27	Light	3-16A-before	3	244.67	9.07546	37.09	0.6658	81.04%	20.01%	4.8967	1.8913	54.3178	0.5656	8.6582	35.39	9.0554	9.0271	51	25.1	0	0	0	0	0	0	0	0
19:24:52	Light	0	1	244.67	9.07308	37.08	0.6672	81.44%	20.15%	4.9299	1.8546	114.5035	0.5698	8.6513	35.36	9.0691	9.0267	51	25.1	0	0	0	0	0	0	0	0
19:25:26	Light	0	2	244.67	9.06385	37.05	0.6674	81.41%	20.13%	4.9246	1.8962	587.4523	0.5693	8.6499	35.35	9.0597	9.0309	51	25.05	0	0	0	0	0	0	0	0
19:25:47	Light	0	3	244.67	9.06129	37.03	0.6675	81.36%	20.11%	4.9208	1.9011	117.012	0.5693	8.6442	35.33	9.0597	9.016	51	25.09	0	0	0	0	0	0	0	0
19:27:40	Light	3-18A-before	1	244.67	9.04852	36.98	0.6689	81.43%	20.15%	4.9289	1.9256	1316.1482	0.5715	8.6239	35.25	9.0696	9.0005	51	24.99	0	0	0	0	0	0	0	0
19:27:58	Light	3-18A-before	2	244.67	9.05845	37.02	0.6685	81.14%	20.08%	4.9134	1.9451	138.6794	0.5701	8.6181	35.22	9.0563	8.9936	51	25.05	0	0	0	0	0	0	0	0
19:28:13	Light	3-18A-before	3	244.67	9.05038	36.99	0.6683	81.15%	20.06%	4.908	1.9427	48.6584	0.5696	8.6163	35.22	9.0526	8.9966	51	25.08	0	0	0	0	0	0	0	0
19:48:25	Light	2-240-12h	1	244.67	8.97984	36.7	0.6592	80.52%	19.48%	4.7664	1.8106	83.4814	0.5547	8.5924	35.12	8.991	8.9283	51	25.04	0	0	0	0	0	0	0	0
19:48:38	Light	2-240-12h	2	244.67	8.98046	36.7	0.6591	80.39%	19.45%	4.7582	1.9256	409.3806	0.5549	8.5753	35.05	8.9899	8.911	51	25.1	0	0	0	0	0	0	0	0
19:48:55	Light	2-240-12h	3	244.67	8.97497	36.68	0.6591	80.45%	19.45%	4.7591	1.9182	207.4304	0.5551	8.5731	35.04	8.986	8.9069	51	25.09	0	0	0	0	0	0	0	0
19:58:46	Light	2-260-11h	1	244.67	-10.00093	-40.88	-0.0068	4	495.46%	12.50%	3.0572	11769.7158	0.0102	0.4995	6.1205	25.02	-10.0009	6.1205	51	25.03	0	0	0	0	0	0	0	0
19:59:03	Light	2-260-11h	2	244.67	8.90628	36.4	0.6063	78.96%	17.43%	4.2635	2.2045	89.7387	0.4792	8.8976	36.37	8.9122	3.7027	51	25.1	0	0	0	0	0	0	0	0
19:59:53	Light	2-260-11h	3	244.67	8.89129	36.34	0.6466	80.38%	18.89%	4.621	1.7641	73.3725	0.5425	8.5186	34.82	8.8958	8.8105	51	25.03	0	0	0	0	0	0	0	0
20:00:09	Light	2-260-11h	4	244.67	8.88968	36.33	0.6465	80.51%	18.91%	4.6272	1.7347	332.3998	0.5433	8.5168	34.81	8.8891	8.8048	51	25.1	0	0	0	0	0	0	0	0
20:00:26	Light	2-260-11h	5	244.67	8.89254	36.35	0.6465	80.52%	18.92%	4.6293	1.7323	199.3146	0.5434	8.5197	34.82	8.8973	8.7998	51	25.1	0	0	0	0	0	0	0	0
20:02:05	Light	3-18-0min	1	244.67	9.10428	37.21	0.6707	81.40%	20.31%	4.9702	1.8815	38.4303	0.5732	8.6717	35.44	9.1036	9.057	51	25.06	0	0	0	0	0	0	0	0
20:02:20	Light	3-18-0min	2	244.67	9.10808	37.23	0.6708	81.24%	20.29%	4.9636	1.8986	52.2428	0.5729	8.6637	35.41	9.0985	9.0357	51	25.1	0	0	0	0	0	0	0	0
20:02:36	Light	3-18-0min	3	244.67	9.08556	37.13	0.6707	81.41%	20.28%	4.9609	1.8986	35.826	0.5727	8.6627	35.41	9.0882	9.0368	51	25.1	0	0	0	0	0	0	0	0
20:13:54	Light	3-18-10min	1	244.67	9.10632	37.22	0.671	81.29%	20.30%	4.967	1.9109	738.1461	0.573	8.6678	35.43	9.0979	9.0454	51	25.02	0	0	0	0	0	0	0	0
20:14:08	Light	3-18-10min	2	244.67	9.09133	37.16	0.6711	81.35%	20.29%	4.9631	1.928	156.1101	0.5723	8.6719	35.44	9.0886	9.0398	51	25.09	0	0	0	0	0	0	0	0
20:14:23	Light	3-18-10min	3	244.67	9.10061	37.2	0.6709	81.27%	20.28%	4.9618	1.9231	198.3178	0.5722	8.6718	35.44	9.0906	9.0446	51	25.1	0	0	0	0	0	0	0	0
20:25:37	Light	3-18-20min	1	244.67	9.10513	37.21	0.671	81.21%	20.28%	4.9613	1.9304	96.2452	0.5722	8.6702	35.44	9.094	9.0334	51	25.03	0	0	0	0	0	0	0	0
20:25:49	Light	3-18-20min	2	244.67	9.0942	37.17	0.671	81.32%	20.28%	4.9624	1.9256	40.5544	0.5723	8.6713	35.44	9.0843	9.0355	51	25.1	0	0	0	0	0	0	0	0
20:25:59	Light	3-18-20min	3	244.67	9.09882	37.19	0.671	81.31%	20.29%	4.9641	1.9182	43.4432	0.5726	8.6688	35.43	9.0819	9.04	51	25.09771	0	0	0	0	0	0	0	0
20:35:46	Light	3-16-0min	1	244.67	9.13221	37.32	0.6713	81.63%	20.45%	5.0043	1.8937	189.4798	0.5739	8.7205	35.64	9.1182	9.0961	51	25.08	0	0	0	0	0	0	0	0
20:36:02	Light	3-16-0min	2	244.67	9.1101	37.23	0.6713	81.62%	20.40%	4.9915	1.9207	54.1757	0.573	8.7118	35.61	9.1227	9.0872	51	25.1	0	0	0	0	0	0	0	0
20:36:17	Light	3-16-0min	3	244.67	9.11862	37.27	0.6712	81.47%	20.38%	4.9865	1.9231	73.7459	0.5728	8.7049	35.58	9.1065	9.0913	51	25.1	0	0	0	0	0	0	0	0
20:37:06	Light	3-18-30min	1	244.67	9.10585	37.22	0.6709	81.20%	20.27%	4.9605	1.9402	44.2237	0.5715	8.679	35.47	9.093	9.0456	51	25.02	0	0	0	0	0	0	0	0
20:37:19	Light	3-18-30min	2	244.67	9.0935	37.17	0.6709	81.34%	20.28%	4.9627	1.928	48.0389	0.5721	8.6745	35.45	9.0915	9.0538	51	25.1	0	0	0	0	0	0	0	0
20:37:36	Light	3-18-30min	3	244.67	9.09528	37.17	0.6709	81.30%	20.28%	4.9607	1.9304	549.9929	0.572	8.6726	35.45	9.0929	9.0491	51	25.1	0	0	0	0	0	0	0	0
20:47:41	Light	3-16-10min	1	244.67	9.12246	37.28	0.6712	81.42%	20.37%	4.9851	1.9231	115.7999	0.5727	8.7049	35.58	9.1123	9.0708	51	25.02	0	0	0	0	0	0	0	0
20:47:53	Light	3-16-10min	2	244.67	9.11546	37.26	0.6711	81.46%	20.37%	4.983	1.9256	40.0787	0.5722	8.7081	35.59	9.1165	9.0748	51	25.1	0	0	0	0	0	0	0	0
20:48:09	Light	3-16-10min	3	244.67	9.11898	37.27	0.6711	81.37%	20.35%	4.9799	1.9231	139.8311	0.5723	8.701	35.56	9.1167	9.0738	51	25.1	0	0	0	0	0	0	0	0
20:49:37	Light	3-18-40min	1	244.67	9.09459	37.17	0.671	81.19%	20.25%	4.9548	1.9353	58.6922	0.5721	8.66	35.39	9.0986	9.0414	51	25.06	0	0	0	0	0	0	0	0
20:49:55	Light	3-18-40min	2	244.67	9.09267	37.16	0.671	81.16%	20.24%	4.9515	1.9451	71.8276	0.5715	8.6641	35.41	9.0792	9.0366	51	25.1	0	0	0	0	0	0	0	0
20:50:12	Light	3-18-40min	3	244.67	9.0833	37.12	0.671	81.24%	20.24%	4.9516	1.9402	58.1808	0.5718	8.6598	35.39	9.0747	9.0401	51	25.1	0	0	0	0	0	0	0	0
20:59:20	Light	3-16-20min	1	244.67	9.12837	37.31	0.6711	81.33%	20.36%	4.9822	1.9182	129.5289	0.5725	8.7026	35.57	9.1111	9.0714	51	25.03	0	0	0	0	0	0	0	0
20:59:32	Light	3-16-20min	2	244.67	9.12169	37.28	0.671	81.38%	20.36%	4.9812	1.9207	58.3295	0.5723	8.7035	35.57	9.1143	9.0717	51	25.1	0	0	0	0	0	0	0	0
20:59:47	Light	3-16-20min	3	244.67	9.11666	37.26	0.6711	81.40%	20.36%	4.9803	1.9231	386.5609	0.5722	8.7031	35.57	9.1026	9.0811	51	25.1	0	0	0	0	0	0	0	0
21:01:18	Light	3-18-50min	1	244.67	9.08484	37.13	0.671	81.34%	20.27%	4.9585	1.928	418.7274	0.5724	8.6621	35.4	9.0914	9.035	51	25.06	0	0	0	0	0	0	0	0
21:01:36	Light	3-18-50min	2	244.67	9.08421	37.13	0.671	81.27%	20.25%	4.9541	1.9304	45.0488	0.5723	8.656	35.38	9.0829	9.0314	51	25.09	0	0	0	0	0	0	0	0
21:01:53	Light	3-18-50min	3	244.67	9.08482	37.13	0.671	81.29%	20.25%	4.9554	1.928	61.4859	0.5724	8.6571	35.38	9.0703	9.0302	51	25.09	0	0	0	0	0	0	0	0
21:03:37	Light	2-260-12h	1	244.67	8.88999	36.33	0.6461	80.49%	18.90%	4.6234	1.7323	89.8324	0.5429	8.5155	34.8	8.8898	8.7832	51	25.09	0	0	0	0	0	0	0	0
21:03:57	Light	2-260-12h	2	244.67	8.87591	36.28	0.6462	80.58%	18.89%	4.6217	1.7323	551.9237	0.5429	8.5123	34.79	8.8919	8.7919	51	25.1	0	0	0	0	0	0	0	0
21:04:15	Light	2-260-12h	3	244.67	8.89151	36.34	0.6461	80.47%	18.89%	4.6229	1.7298	91.5908	0.543	8.514	34.8	8.8797	8.7969	51	25.1	0	0	0	0	0	0	0	0
21:10:09	Light	3-14-0min	1	244.67	9.11037	37.24	0.6705	81.71%	20.40%	4.9914	1.8644	29.0283	0.5733	8.706	35.58	9.1046	9.0798	51	25.01	0	0	0	0	0	0	0	0
21:10:19	Light	3-14-0min	2	244.67	9.09938	37.19	0.6705	81.76%	20.39%	4.988	1.8717	75.78	0.5733	8.7011	35.56	9.1167	9.0761	51	25.08	0	0	0	0	0	0	0	0
21:10:34	Light	3-14-0min	3	244.67	9.10396	37.21	0.6706	81.69%	20.38%	4.987	1.8766	46.3436	0.5736	8.6949	35.54	9.0988	9.0516	51	25.08	0	0	0	0	0	0	0	0
21:11:26	Light	3-16-30min	1	244.67	9.11033	37.24	0.671	81.42%	20.34%	4.9774	1.9329	137.6982	0.5722	8.6987	35.55	9.1165	9.0793	51	25.02	0	0	0	0	0	0	0	0
21:11:41	Light	3-16-30min	2	244.67	9.11542	37.26	0.671	81.38%	20.34%	4.9774	1.9353	57.0127	0.5717	8.7067	35.59	9.1068	9.0728	51	25.07	0	0	0	0	0	0	0	0
21:11:54	Light	3-16-30min	3	244.67	9.11602	37.26	0.671	81.39%	20.35%	4.9783	1.9256	60.3879	0.5724	8.6977	35.55	9.1035	9.0777	51	25.09	0	0	0	0	0	0	0	0
21:12:43	Light	3-18-60min	1	244.67	9.0943	37.17	0.6711	81.34%	20.29%	4.9645	1.9329	200.2188	0.5725	8.6724	35.45	9.0875	9.0496	51	25.03	0	0	0	0	0	0	0	0
21:12:55	Light	3-18-60min	2	244.67	9.09371	37.17	0.671	81.38%	20.30%	4.966	1.9256	216.8469	0.5727	8.6713	35.44	9.0771	9.0472	51	25.1	0	0	0	0	0	0	0	0
21:13:10	Light	3-18-60min	3	244.67	9.09608	37.18	0.671	81.34%	20.29%	4.9647	1.928	305.1766	0.5726	8.671	35.44	9.0855	9.0492	51	25.1	0	0	0	0	0	0	0	0
21:21:12	Light	3-14-10min	1	244.67	9.09552	37.17	0.6706	81.66%	20.36%	4.981	1.8864	77.105	0.573	8.6927	35.53	9.0966	9.0647	51	25	0	0	0	0	0	0	0	0
21:21:22	Light	3-14-10min	2	244.67	9.07766	37.1	0.6706	81.77%	20.34%	4.9776	1.8937	197.2607	0.5728	8.6906	35.52	9.0989	9.0626	51	25.09	0	0	0	0	0	0	0	0
21:21:37	Light	3-14-10min	3	244.67	9.09736	37.18	0.6706	81.60%	20.35%	4.9784	1.8913	100.9988	0.5731	8.6873	35.51	9.1015	9.0623	51	25.1	0	0	0	0	0	0	0	0
21:23:08	Light	3-16-40min	1	244.67	9.10129	37.2	0.6709	81.43%	20.32%	4.9723	1.9378	37.446	0.5715	8.6998	35.56	9.1019	9.0728	51	25.06	0	0	0	0	0	0	0	0
21:23:24	Light	3-16-40min	2	244.67	9.10997	37.23	0.6709	81.37%	20.33%	4.9733	1.9231	57.9311	0.5719	8.6964	35.54	9.0874	9.0723	51	25.1	0	0	0	0	0	0	0	0
21:23:39	Light	3-16-40min	3	244.67	9.1036	37.21	0.6709	81.47%	20.34%	4.9758	1.9182	165.9734	0.5724	8.6928	35.53	9.1049	9.075	51	25.1	0	0	0	0	0	0	0	0
21:32:08	Light	3-14-20min	1	244.67	9.08928	37.15	0.6705	81.82%	20.38%	4.9865	1.8791	37.5494	0.5732	8.6992	35.55	9.1068	9.0534	51	25	0	0	0	0	0	0	0	0
21:32:22	Light	3-14-20min	2	244.67	9.10893	37.23	0.6705	81.58%	20.36%	4.9826	1.8815	47.4852	0.5731	8.6945	35.54	9.0954	9.0683	51	25.07	0	0	0	0	0	0	0	0
21:32:35	Light	3-14-20min	3	244.67	9.10238	37.2	0.6705	81.64%	20.37%	4.9829	1.884	193.3786	0.5728	8.6997	35.56	9.0864	9.0505	51	25.1	0	0	0	0	0	0	0	0
21:34:28	Light	3-16-50min	1	244.67	9.08966	37.15	0.6708	81.55%	20.32%	4.9723	1.9231	1157.907	0.572	8.6934	35.53	9.0984	9.0512	51	25.06	0	0	0	0	0	0	0	0
21:34:43	Light	3-16-50min	2	244.67	9.08882	37.15	0.6708	81.51%	20.31%	4.9696	1.9256	84.9286	0.5718	8.6917	35.52	9.0919	9.0526	51	25.1	0	0	0	0	0	0	0	0
21:34:50	Light	3-16-50min	3	244.67	9.09032	37.15	0.6708	81.58%	20.33%	4.9746	1.9133	183.791	0.5725	8.6896	35.52	9.1028	9.066	51	25.09988	0	0	0	0	0	0	0	0
21:43:52	Light	3-16-50min	4	244.67	9.10844	37.23	0.6705	81.88%	20.44%	5.0006	1.8179	60.8608	0.5753	8.6928	35.53	9.1175	9.0942	51	25.02	0	0	0	0	0	0	0	0
21:44:09	Light	3-14-30min	1	244.67	9.10793	37.23	0.6705	81.78%	20.41%	4.994	1.8522	75.7478	0.574	8.6996	35.56	9.118	9.071	51	25.07	0	0	0	0	0	0	0	0
21:44:25	Light	3-14-30min	2	244.67	9.11043	37.24	0.6705	81.74%	20.41%	4.9929	1.8546	82.324	0.5738	8.7016	35.56	9.0995	9.0815	51	25.08	0	0	0	0	0	0	0	0
21:46:15	Light	3-18-1.5h	1	244.67	9.0868	37.14	0.6711	81.40%	20.29%	4.9637	1.9231	123.7606	0.5731	8.6614	35.4	9.0864	9.036	51	25.03	0	0	0	0	0	0	0	0
21:46:30	Light	3-18-1.5h	2	244.67	9.0866	37.14	0.6711	81.37%	20.28%	4.962	1.9182	124.2974	0.5733	8.6551	35.37	9.0757	9.0367	51	25.08	0	0	0	0	0	0	0	0
21:46:47	Light	3-18-1.5h	3	244.67	9.08569	37.13	0.671	81.38%	20.28%	4.9616	1.9231	136.7431	0.573	8.6594	35.39	9.1052	9.033	51	25.09	0	0	0	0	0	0	0	0
21:48:08	Light	3-16-1h	1	244.67	9.10138	37.2	0.6708	81.36%	20.30%	4.9672	1.9329	168.8808	0.5714	8.6925	35.53	9.1003	9.0457	51	25.05	0	0	0	0	0	0	0	0
21:48:23	Light	3-16-1h	2	244.67	9.11012	37.23	0.6707	81.38%	20.32%	4.9722	1.9182	244.6216	0.5719	8.694	35.53	9.0987	9.0731	51	25.1	0	0	0	0	0	0	0	0
21:48:45	Light	3-16-1h	3	244.67	9.10566	37.22	0.6707	81.39%	20.32%	4.9709	1.9182	37.3455	0.5718	8.6927	35.53	9.1024	9.0615	51	25.06	0	0	0	0	0	0	0	0
21:49:36	Light	3-12-0min	1	244.67	9.08762	37.14	0.6684	80.97%	20.10%	4.9181	1.9574	23.6776	0.5683	8.6542	35.37	9.0699	9.0364	51	25.05	0	0	0	0	0	0	0	0
21:49:53	Light	3-12-0min	2	244.67	9.08063	37.11	0.6686	80.98%	20.10%	4.9168	1.9769	29.1831	0.5685	8.6495	35.35	9.0813	9.0209	51	25.09	0	0	0	0	0	0	0	0
21:50:11	Light	3-12-0min	3	244.67	9.07524	37.09	0.6686	80.98%	20.08%	4.9134	1.9818	272.5367	0.5683	8.6455	35.34	9.0715	9.0314	51	25.09	0	0	0	0	0	0	0	0
21:55:49	Light	3-14-40min	1	244.67	9.07547	37.09	0.6705	81.32%	20.23%	4.9486	1.9231	92.4351	0.5711	8.6654	35.42	9.0696	9.0423	51	24.98	0	0	0	0	0	0	0	0
21:56:02	Light	3-14-40min	2	244.67	9.07981	37.11	0.6705	81.37%	20.25%	4.9537	1.9035	43.4698	0.572	8.6596	35.39	9.0731	9.0376	51	25.06	0	0	0	0	0	0	0	0
21:56:12	Light	3-14-40min	3	244.67	9.07023	37.07	0.6705	81.48%	20.25%	4.9555	1.9011	98.8498	0.5719	8.6655	35.42	9.0678	9.0402	51	25.1	0	0	0	0	0	0	0	0
22:01:56	Light	3-12-10min	1	244.67	9.06029	37.03	0.6691	81.16%	20.11%	4.92	1.8448	50.3714	0.5699	8.6338	35.29	9.0592	9.0259	51	24.99	0	0	0	0	0	0	0	0
22:02:08	Light	3-12-10min	2	244.67	9.05825	37.02	0.6691	81.20%	20.12%	4.9217	1.8424	142.2687	0.57	8.635	35.29	9.0659	9.0297	51	25.07	0	0	0	0	0	0	0	0
22:02:21	Light	3-12-10min	3	244.67	9.05629	37.01	0.669	81.28%	20.13%	4.9246	1.8375	50.1249	0.5704	8.6336	35.29	9.0615	9.0224	51	25.09	0	0	0	0	0	0	0	0
22:07:35	Light	3-14-50min	1	244.67	9.10832	37.23	0.6705	81.68%	20.39%	4.9881	1.8595	312.5518	0.5737	8.6946	35.54	9.1116	9.07	51	24.99	0	0	0	0	0	0	0	0
22:07:46	Light	3-14-50min	2	244.67	9.11118	37.24	0.6704	81.65%	20.38%	4.987	1.8619	282.2884	0.5737	8.6931	35.53	9.1081	9.072	51	25.07	0	0	0	0	0	0	0	0
22:08:03	Light	3-14-50min	3	244.67	9.10006	37.19	0.6704	81.73%	20.38%	4.9863	1.8619	234.2412	0.5736	8.6934	35.53	9.1086	9.073	51	25.08	0	0	0	0	0	0	0	0
22:13:03	Light	3-12-20min	1	244.67	9.08625	37.14	0.6692	81.15%	20.17%	4.9342	1.8522	167.2564	0.5696	8.6623	35.4	9.0781	9.0347	51	25	0	0	0	0	0	0	0	0
22:13:14	Light	3-12-20min	2	244.67	9.0913	37.16	0.6691	81.11%	20.16%	4.9337	1.8546	109.881	0.5694	8.6645	35.41	9.0933	9.0506	51	25.08	0	0	0	0	0	0	0	0
22:13:32	Light	3-12-20min	3	244.67	9.10052	37.2	0.6691	81.02%	20.16%	4.9334	1.8522	71.7831	0.5695	8.6625	35.4	9.0873	9.0358	51	25.08	0	0	0	0	0	0	0	0
22:16:30	Light	3-16-1.5h	1	244.67	9.10763	37.22	0.6708	81.37%	20.32%	4.9711	1.9158	92.5959	0.5719	8.6926	35.53	9.1031	9.0606	51	25	0	0	0	0	0	0	0	0
22:16:45	Light	3-16-1.5h	2	244.67	9.11871	37.27	0.6707	81.23%	20.31%	4.9682	1.9256	228.9755	0.5715	8.6938	35.53	9.1052	9.0587	51	25.07	0	0	0	0	0	0	0	0
22:17:01	Light	3-16-1.5h	3	244.67	9.10831	37.23	0.6707	81.31%	20.30%	4.967	1.9231	31437.2286	0.5716	8.6899	35.52	9.088	9.0652	51	25.09	0	0	0	0	0	0	0	0
22:18:46	Light	3-14-1h	1	244.67	9.09886	37.19	0.6704	81.61%	20.35%	4.9779	1.8717	145.0557	0.573	8.6868	35.5	9.0884	9.0664	51	25.01	0	0	0	0	0	0	0	0
22:19:00	Light	3-14-1h	2	244.67	9.08203	37.12	0.6704	81.73%	20.34%	4.976	1.8742	201.2584	0.573	8.684	35.49	9.0911	9.0524	51	25.09	0	0	0	0	0	0	0	0
22:19:17	Light	3-14-1h	3	244.67	9.08577	37.13	0.6703	81.68%	20.33%	4.9747	1.8766	139.6286	0.5728	8.6856	35.5	9.0788	9.059	51	25.09	0	0	0	0	0	0	0	0
22:20:46	Light	3-18-2h	1	244.67	9.07907	37.11	0.671	81.44%	20.28%	4.9611	1.9231	569.129	0.5727	8.6623	35.4	9.0767	9.0294	51	25.03	0	0	0	0	0	0	0	0
22:21:00	Light	3-18-2h	2	244.67	9.08323	37.12	0.671	81.36%	20.27%	4.959	1.9304	557.1991	0.5725	8.6621	35.4	9.0814	9.0457	51	25.1	0	0	0	0	0	0	0	0
22:21:17	Light	3-18-2h	3	244.67	9.0812	37.12	0.671	81.35%	20.26%	4.9571	1.9304	389.7658	0.5724	8.6601	35.4	9.085	9.0291	51	25.09	0	0	0	0	0	0	0	0
22:24:01	Light	3-8-0min	1	244.67	9.09063	37.15	0.6691	81.78%	20.33%	4.9745	1.7983	725.8245	0.5726	8.6881	35.51	9.0921	9.06	51	25.01	0	0	0	0	0	0	0	0
22:24:13	Light	3-8-0min	2	244.67	9.08746	37.14	0.6692	81.64%	20.29%	4.9648	1.8228	23.6995	0.5719	8.6811	35.48	9.0787	9.0464	51	25.09	0	0	0	0	0	0	0	0
22:24:28	Light	3-8-0min	3	244.67	9.08041	37.11	0.6692	81.69%	20.29%	4.9638	1.8228	106.6862	0.5718	8.6807	35.48	9.0922	9.0514	51	25.1	0	0	0	0	0	0	0	0
22:26:14	Light	3-12-30min	1	244.67	9.09009	37.15	0.6691	81.12%	20.17%	4.9339	1.8497	183.9978	0.5696	8.6622	35.4	9.0699	9.0516	51	25	0	0	0	0	0	0	0	0
22:26:26	Light	3-12-30min	2	244.67	9.09078	37.16	0.6691	81.10%	20.16%	4.933	1.857	49.7352	0.5695	8.6615	35.4	9.0913	9.0393	51	25.09	0	0	0	0	0	0	0	0
22:26:42	Light	3-12-30min	3	244.67	9.07943	37.11	0.6692	81.16%	20.16%	4.9313	1.8619	496.0503	0.5694	8.661	35.4	9.0744	9.0457	51	25.08	0	0	0	0	0	0	0	0
22:36:26	Light	3-8-10min	1	244.67	9.09547	37.17	0.6693	81.71%	20.33%	4.9741	1.8106	130.1868	0.5725	8.6878	35.51	9.0774	9.0753	51	24.97	0	0	0	0	0	0	0	0
22:36:34	Light	3-8-10min	2	244.67	9.08207	37.12	0.6694	81.83%	20.33%	4.9747	1.8155	1735.8982	0.5725	8.6889	35.51	9.0968	9.0648	51	25.05	0	0	0	0	0	0	0	0
22:36:49	Light	3-8-10min	3	244.67	9.09341	37.17	0.6693	81.68%	20.32%	4.9711	1.8252	63.3449	0.5719	8.692	35.53	9.0935	9.0694	51	25.1	0	0	0	0	0	0	0	0
22:38:29	Light	3-12-40min	1	244.67	9.09175	37.16	0.669	81.30%	20.21%	4.945	1.8057	194.6422	0.5711	8.6589	35.39	9.1021	9.0606	51	25.01	0	0	0	0	0	0	0	0
22:38:38	Light	3-12-40min	2	244.67	9.09037	37.15	0.6691	81.35%	20.22%	4.948	1.791	60.5501	0.5718	8.6539	35.37	9.0895	9.051	51	25.1	0	0	0	0	0	0	0	0
22:38:57	Light	3-12-40min	3	244.67	9.1038	37.21	0.6691	81.12%	20.19%	4.9411	1.8228	554.354	0.5708	8.6569	35.38	9.0726	9.0495	51	25.09	0	0	0	0	0	0	0	0
22:49:12	Light	3-16-2h	1	244.67	9.11016	37.23	0.6706	81.44%	20.33%	4.9753	1.9133	384.2304	0.5716	8.7042	35.58	9.1012	9.0608	51	25	0	0	0	0	0	0	0	0
22:49:23	Light	3-16-2h	2	244.67	9.09366	37.17	0.6706	81.46%	20.30%	4.9676	1.9256	208.2877	0.5712	8.6975	35.55	9.1034	9.0655	51	25.09	0	0	0	0	0	0	0	0
22:49:41	Light	3-16-2h	3	244.67	9.09979	37.19	0.6706	81.42%	20.31%	4.9684	1.9231	57.2379	0.5712	8.6976	35.55	9.1119	9.0614	51	25.09	0	0	0	0	0	0	0	0
22:51:09	Light	3-8-20min	1	244.67	9.081	37.12	0.6691	81.83%	20.32%	4.9722	1.8081	29.6518	0.5722	8.6903	35.52	9.0886	9.0613	51	25.01	0	0	0	0	0	0	0	0
22:51:24	Light	3-8-20min	2	244.67	9.09109	37.16	0.6691	81.71%	20.31%	4.9703	1.8203	315.678	0.5719	8.6913	35.52	9.0957	9.0513	51	25.09	0	0	0	0	0	0	0	0
22:51:46	Light	3-8-20min	3	244.67	9.08963	37.15	0.6691	81.70%	20.31%	4.9691	1.8228	3997.123	0.5718	8.6908	35.52	9.0958	9.0546	51	25.08	0	0	0	0	0	0	0	0
22:53:26	Light	3-12-50min	1	244.67	9.10015	37.19	0.6689	81.11%	20.18%	4.937	1.9598	310.6098	0.57	8.6613	35.4	9.082	9.0541	51	25.05	0	0	0	0	0	0	0	0
22:53:43	Light	3-12-50min	2	244.67	9.09623	37.18	0.669	81.17%	20.19%	4.9397	1.9574	234.8339	0.5702	8.6637	35.41	9.09	9.0555	51	25.1	0	0	0	0	0	0	0	0
22:54:03	Light	3-12-50min	3	244.67	9.0855	37.13	0.669	81.28%	20.19%	4.9405	1.9549	149.5807	0.5702	8.6646	35.41	9.0935	9.0427	51	25.1	0	0	0	0	0	0	0	0
22:55:28	Light	3-14-1.5h	1	244.67	9.08972	37.15	0.6702	81.80%	20.37%	4.9831	1.8546	272.4729	0.5731	8.6946	35.54	9.1011	9.0667	51	25.03	0	0	0	0	0	0	0	0
22:55:45	Light	3-14-1.5h	2	244.67	9.09228	37.16	0.6702	81.70%	20.35%	4.9787	1.8619	797.7226	0.573	8.6885	35.51	9.1074	9.0536	51	25.08	0	0	0	0	0	0	0	0
22:56:02	Light	3-14-1.5h	3	244.67	9.10163	37.2	0.6702	81.64%	20.35%	4.98	1.8595	65.4049	0.573	8.6911	35.52	9.0974	9.0641	51	25.09	0	0	0	0	0	0	0	0
22:57:12	Light	3-18-2.5h	1	244.67	9.07749	37.1	0.671	81.44%	20.27%	4.9603	1.9182	137.1769	0.5729	8.6585	35.39	9.0836	9.0339	51	25.02	0	0	0	0	0	0	0	0
22:57:27	Light	3-18-2.5h	2	244.67	9.07585	37.09	0.6709	81.43%	20.26%	4.958	1.9207	40.4437	0.5727	8.6564	35.38	9.0938	9.023	51	25.09	0	0	0	0	0	0	0	0
22:57:44	Light	3-18-2.5h	3	244.67	9.07951	37.11	0.6709	81.37%	20.26%	4.9569	1.9256	93.5382	0.5729	8.6528	35.37	9.0751	9.0243	51	25.1	0	0	0	0	0	0	0	0
22:59:56	Light	3-6-0min	1	244.67	9.10408	37.21	0.6703	81.38%	20.30%	4.9663	1.8742	132.2368	0.5719	8.6832	35.49	9.0896	9.072	51	25.01	0	0	0	0	0	0	0	0
23:00:07	Light	3-6-0min	2	244.67	9.09914	37.19	0.6703	81.23%	20.25%	4.9543	1.8986	29.4275	0.571	8.6771	35.46	9.094	9.0554	51	25.09	0	0	0	0	0	0	0	0
23:00:22	Light	3-6-0min	3	244.67	9.08307	37.12	0.6703	81.34%	20.24%	4.9526	1.9035	453.075	0.5706	8.6797	35.48	9.0946	9.0522	51	25.09	0	0	0	0	0	0	0	0
23:04:50	Light	3-8-30min	1	244.67	9.08394	37.13	0.6694	81.67%	20.30%	4.9659	1.8448	41.84	0.5716	8.6877	35.51	9.0863	9.0538	51	24.95	0	0	0	0	0	0	0	0
23:05:00	Light	3-8-30min	2	244.67	9.08481	37.13	0.6694	81.64%	20.29%	4.9649	1.8399	193.1982	0.5717	8.6838	35.49	9.0799	9.0533	51	25.05	0	0	0	0	0	0	0	0
23:05:13	Light	3-8-30min	3	244.67	9.08983	37.15	0.6693	81.62%	20.30%	4.9658	1.835	42.9076	0.5718	8.6851	35.5	9.0811	9.0513	51	25.09	0	0	0	0	0	0	0	0
23:06:37	Light	3-12-1h	1	244.67	9.08494	37.13	0.669	81.01%	20.12%	4.9236	1.8497	1635.8833	0.5696	8.6446	35.33	9.0831	9.0272	51	25	0	0	0	0	0	0	0	0
23:06:44	Light	3-12-1h	2	244.67	9.07799	37.1	0.669	81.16%	20.15%	4.929	1.8228	345.8025	0.5707	8.637	35.3	9.0783	9.0362	51	25.08	0	0	0	0	0	0	0	0
23:07:01	Light	3-12-1h	3	244.67	9.08319	37.12	0.669	81.06%	20.13%	4.9257	1.8473	1337.5321	0.5698	8.6451	35.33	9.0766	9.0249	51	25.09	0	0	0	0	0	0	0	0
23:12:33	Light	3-6-10min	1	244.67	9.09595	37.18	0.6702	81.35%	20.27%	4.9593	1.8791	119.465	0.5713	8.6809	35.48	9.0918	9.0627	51	24.97	0	0	0	0	0	0	0	0
23:12:47	Light	3-6-10min	2	244.67	9.10448	37.21	0.6702	81.16%	20.24%	4.952	1.9011	725.097	0.5705	8.6803	35.48	9.1132	9.0596	51	25.05	0	0	0	0	0	0	0	0
23:12:56	Light	3-6-10min	3	244.67	9.09099	37.16	0.67	81.30%	20.24%	4.952	1.8962	91.2499	0.5705	8.6795	35.47	9.082	9.0596	51	25.1	0	0	0	0	0	0	0	0
23:16:21	Light	3-8-40min	1	244.67	9.09248	37.16	0.6693	81.69%	20.32%	4.9715	1.8155	370.8664	0.5724	8.685	35.5	9.0858	9.0538	51	24.99	0	0	0	0	0	0	0	0
23:16:30	Light	3-8-40min	2	244.67	9.09072	37.16	0.6692	81.70%	20.32%	4.9705	1.8252	46.458	0.5721	8.6879	35.51	9.0942	9.0467	51	25.08	0	0	0	0	0	0	0	0
23:16:45	Light	3-8-40min	3	244.67	9.09651	37.18	0.6692	81.62%	20.31%	4.9683	1.8301	30.6543	0.5718	8.6891	35.51	9.0962	9.0545	51	25.1	0	0	0	0	0	0	0	0
23:22:25	Light	3-16-2.5h	1	244.67	9.10038	37.19	0.6706	81.39%	20.30%	4.9671	1.9109	47.474	0.5718	8.6873	35.51	9.1153	9.064	51	24.97	0	0	0	0	0	0	0	0
23:22:38	Light	3-16-2.5h	2	244.67	9.10283	37.2	0.6706	81.32%	20.29%	4.9643	1.9158	59.6899	0.5715	8.6869	35.5	9.0986	9.0527	51	25.05	0	0	0	0	0	0	0	0
23:22:50	Light	3-16-2.5h	3	244.67	9.09094	37.16	0.6705	81.47%	20.30%	4.9659	1.9084	161.8744	0.5717	8.6865	35.5	9.0988	9.0559	51	25.1	0	0	0	0	0	0	0	0
23:24:05	Light	3-6-20min	1	244.67	9.09666	37.18	0.6699	81.28%	20.24%	4.9529	1.8913	54.8462	0.5704	8.6828	35.49	9.0902	9.0576	51	25	0	0	0	0	0	0	0	0
23:24:17	Light	3-6-20min	2	244.67	9.10535	37.21	0.6699	81.14%	20.23%	4.9493	1.8986	467.786	0.57	8.6823	35.49	9.0929	9.0552	51	25.09	0	0	0	0	0	0	0	0
23:24:34	Light	3-6-20min	3	244.67	9.09955	37.19	0.6699	81.17%	20.22%	4.948	1.9011	86.6848	0.57	8.6801	35.48	9.0938	9.0468	51	25.09	0	0	0	0	0	0	0	0
23:25:52	Light	3-8-50min	1	244.67	9.08908	37.15	0.6691	81.71%	20.31%	4.9692	1.813	300.1986	0.572	8.6874	35.51	9.0939	9.057	51	25.01	0	0	0	0	0	0	0	0
23:26:04	Light	3-8-50min	2	244.67	9.08843	37.15	0.6691	81.68%	20.30%	4.967	1.8228	68.3304	0.5716	8.6898	35.52	9.1191	9.0569	51	25.1	0	0	0	0	0	0	0	0
23:26:23	Light	3-8-50min	3	244.67	9.07651	37.1	0.6692	81.80%	20.31%	4.9684	1.8228	165.6972	0.5718	8.6895	35.52	9.0882	9.0743	51	25.09	0	0	0	0	0	0	0	0
23:28:14	Light	3-14-2h	1	244.67	9.08698	37.14	0.6702	81.83%	20.37%	4.9833	1.8448	83.026	0.5737	8.6862	35.5	9.0908	9.074	51	25	0	0	0	0	0	0	0	0
23:28:24	Light	3-14-2h	2	244.67	9.09699	37.18	0.6702	81.68%	20.35%	4.9801	1.8497	193.6932	0.5735	8.6842	35.49	9.1023	9.0594	51	25.09	0	0	0	0	0	0	0	0
23:28:41	Light	3-14-2h	3	244.67	9.09904	37.19	0.6702	81.64%	20.35%	4.9783	1.857	72.9024	0.5732	8.6843	35.49	9.0898	9.057	51	25.09	0	0	0	0	0	0	0	0
23:30:09	Light	3-18-3h	1	244.67	9.09768	37.18	0.6709	81.25%	20.27%	4.9589	1.9158	190.197	0.5728	8.6574	35.38	9.0868	9.0295	51	25	0	0	0	0	0	0	0	0
23:30:21	Light	3-18-3h	2	244.67	9.07931	37.11	0.6709	81.38%	20.26%	4.9571	1.9182	117.2825	0.5726	8.6567	35.38	9.0749	9.027	51	25.08	0	0	0	0	0	0	0	0
23:30:36	Light	3-18-3h	3	244.67	9.10123	37.2	0.6709	81.17%	20.26%	4.9562	1.9182	176.5026	0.5726	8.6559	35.38	9.0961	9.0307	51	25.09	0	0	0	0	0	0	0	0
23:33:01	Light	0	1	244.67	9.07379	37.09	0.6675	81.59%	20.20%	4.9419	1.884	274.3128	0.5698	8.6738	35.45	9.0953	9.0468	51	24.95	0	0	0	0	0	0	0	0
23:33:15	Light	0	2	244.67	9.08237	37.12	0.6677	81.41%	20.18%	4.9371	1.9084	46.9879	0.5693	8.6719	35.44	9.0949	9.0505	51	25.04	0	0	0	0	0	0	0	0
23:33:32	Light	0	3	244.67	9.07317	37.08	0.6677	81.44%	20.16%	4.9338	1.9109	255.8677	0.5693	8.6661	35.42	9.0832	9.0472	51	25.05	0	0	0	0	0	0	0	0
23:36:05	Light	3-6-30min	1	244.67	9.09648	37.18	0.67	81.27%	20.24%	4.9531	1.8889	130.3985	0.5706	8.68	35.48	9.0962	9.0544	51	24.97	0	0	0	0	0	0	0	0
23:36:17	Light	3-6-30min	2	244.67	9.09897	37.19	0.67	81.19%	20.23%	4.9496	1.8986	569.7258	0.5702	8.6807	35.48	9.091	9.0459	51	25.05	0	0	0	0	0	0	0	0
23:36:28	Light	3-6-30min	3	244.67	9.09595	37.18	0.67	81.20%	20.23%	4.9488	1.8937	136.4037	0.5705	8.6747	35.45	9.0912	9.0586	51	25.1	0	0	0	0	0	0	0	0
23:37:37	Light	3-8-1h	1	244.67	9.09447	37.17	0.6692	81.71%	20.32%	4.9729	1.8081	6232.6233	0.5724	8.6877	35.51	9.0904	9.0631	51	25	0	0	0	0	0	0	0	0
23:37:45	Light	3-8-1h	2	244.67	9.09411	37.17	0.6692	81.76%	20.34%	4.9757	1.7983	389.6669	0.573	8.6841	35.49	9.0937	9.0526	51	25.08	0	0	0	0	0	0	0	0
23:38:03	Light	3-8-1h	3	244.67	9.09244	37.16	0.6692	81.67%	20.31%	4.9691	1.8179	582.1451	0.5721	8.6863	35.5	9.0861	9.0498	51	25.09	0	0	0	0	0	0	0	0
23:39:46	Light	3-12-1.5h	1	244.67	9.08595	37.14	0.6691	81.08%	20.15%	4.9292	1.8375	111.9925	0.5701	8.6455	35.34	9.0831	9.0388	51	24.98	0	0	0	0	0	0	0	0
23:39:57	Light	3-12-1.5h	2	244.67	9.08692	37.14	0.6691	81.02%	20.13%	4.9258	1.8399	35.3288	0.57	8.6418	35.32	9.069	9.032	51	25.07	0	0	0	0	0	0	0	0
23:40:12	Light	3-12-1.5h	3	244.67	9.07456	37.09	0.669	81.14%	20.13%	4.926	1.9671	46.4888	0.5698	8.6449	35.33	9.0897	9.0234	51	25.09	0	0	0	0	0	0	0	0
23:47:52	Light	3-6-40min	1	244.67	9.0912	37.16	0.6699	81.24%	20.22%	4.9476	1.8937	215.567	0.5706	8.6714	35.44	9.085	9.0481	51	24.96	0	0	0	0	0	0	0	0
23:48:02	Light	3-6-40min	2	244.67	9.09163	37.16	0.6699	81.19%	20.21%	4.9449	1.9011	57.2617	0.5701	8.6738	35.45	9.0825	9.0475	51	25.05	0	0	0	0	0	0	0	0
23:48:14	Light	3-6-40min	3	244.67	9.08873	37.15	0.6699	81.22%	20.21%	4.9451	1.9035	98.9195	0.5699	8.6773	35.47	9.0867	9.0685	51	25.1	0	0	0	0	0	0	0	0
23:54:03	Light	3-16-3h	1	244.67	9.10644	37.22	0.6704	81.51%	20.34%	4.976	1.8668	58.4341	0.5729	8.6864	35.5	9.1066	9.0799	51	24.98	0	0	0	0	0	0	0	0
23:54:10	Light	3-16-3h	2	244.67	9.11746	37.26	0.6704	81.38%	20.33%	4.9741	1.8693	106.8035	0.5727	8.6861	35.5	9.1081	9.0704	51	25.06	0	0	0	0	0	0	0	0
23:54:27	Light	3-16-3h	3	244.67	9.11265	37.24	0.6704	81.36%	20.31%	4.9704	1.8913	80.1105	0.5718	8.6925	35.53	9.105	9.0643	51	25.09	0	0	0	0	0	0	0	0
23:59:21	Light	3-6-50min	1	244.67	9.10114	37.2	0.6699	81.27%	20.25%	4.9552	1.884	34.1585	0.5706	8.6846	35.5	9.0995	9.0621	51	24.99	0	0	0	0	0	0	0	0
23:59:34	Light	3-6-50min	2	244.67	9.09639	37.18	0.6698	81.21%	20.22%	4.9477	1.9035	76.7242	0.5697	8.6844	35.49	9.0929	9.0573	51	25.06	0	0	0	0	0	0	0	0
23:59:47	Light	3-6-50min	3	244.67	9.09174	37.16	0.6698	81.24%	20.22%	4.9469	1.9035	84.4256	0.5697	8.6827	35.49	9.104	9.0697	51	25.1	0	0	0	0	0	0	0	0
