# Supplementary material for: Study on the Electrical Injection Regeneration of Industrialized B-Doped Czochralski Silicon PERC Solar Cells
Source: Hindawi journal article supplement (doi:10.1155/2019/5357370), 2019-06-20
Supplement: f1 [file 5357370.f1.zip › section3.1/IVRawData_000.csv]

19:24 03/04/2018
Test Lot:	JK-PERC
Recipe:	Recipe_YJX-LID
Cell Name:	000
Test Order:	2
Test Condition:	Light
1	-0.29981434	9.07580950	-2.72105784		1.00000000	34.34000000	311.66329823	0.000000
2	-0.29003957	9.07157900	-2.63111687		2.00000000	17.17000000	155.75901143	0.061789
3	-0.27988073	9.06660750	-2.53756873		3.00000000	11.44666667	103.78243385	0.083223
4	-0.27008286	9.07031540	-2.44973672		4.00000000	8.58500000	77.86865771	0.104722
5	-0.25989723	9.07570550	-2.35875072		5.00000000	6.86800000	62.33194537	0.126102
6	-0.24974285	9.06474970	-2.26385642		6.00000000	5.72333333	51.88058412	0.147463
7	-0.23992491	9.07401180	-2.17708146		7.00000000	4.90571429	44.51450932	0.168889
8	-0.22976384	9.07687760	-2.08553825		8.00000000	4.29250000	38.96249710	0.190375
9	-0.21993695	9.06703950	-1.99417701		9.00000000	3.81555556	34.59579294	0.211773
10	-0.20981309	9.06729980	-1.90243819		10.00000000	3.43400000	31.13710751	0.233113
11	-0.19995494	9.07072070	-1.81373541		11.00000000	3.12181818	28.31714080	0.254485
12	-0.18983258	9.07698060	-1.72310665		12.00000000	2.86166667	25.97529282	0.275980
13	-0.18001910	9.07388020	-1.63347175		13.00000000	2.64153846	23.96900354	0.297359
14	-0.16991310	9.06983280	-1.54108341		14.00000000	2.45285714	22.24700417	0.318752
15	-0.16007505	9.07036020	-1.45193836		15.00000000	2.28933333	20.76507795	0.340090
16	-0.14993185	9.06713490	-1.35945231		16.00000000	2.14625000	19.46033828	0.361560
17	-0.13979161	9.07117460	-1.26807410		17.00000000	2.02000000	18.32377269	0.382945
18	-0.12997514	9.07222940	-1.17916429		18.00000000	1.90777778	17.30779764	0.404328
19	-0.11982003	9.06952950	-1.08671130		19.00000000	1.80736842	16.39198121	0.425766
20	-0.10999835	9.06261730	-0.99687295		20.00000000	1.71700000	15.56051390	0.447236
21	-0.09981123	9.07429890	-0.90571697		21.00000000	1.63523810	14.83863925	0.468606
22	-0.09004836	9.06820300	-0.81657679		22.00000000	1.56090909	14.15464050	0.489987
23	-0.07987910	9.06922530	-0.72444154		23.00000000	1.49304348	13.54074769	0.511334
24	-0.07007901	9.07602310	-0.63603875		24.00000000	1.43083333	12.98627639	0.532818
25	-0.05993878	9.05537220	-0.54276797		25.00000000	1.37360000	12.43845925	0.554194
26	-0.04977027	9.08182530	-0.45200486		26.00000000	1.32076923	11.99499542	0.575563
27	-0.03998357	9.06104660	-0.36229303		27.00000000	1.27185185	11.52430890	0.596925
28	-0.02979869	9.06376840	-0.27008838		28.00000000	1.22642857	11.11606453	0.618400
29	-0.01997701	9.07698730	-0.18133108		29.00000000	1.18413793	10.74840496	0.639787
30	-0.00986581	9.06729510	-0.08945619		30.00000000	1.14466667	10.37903046	0.661172
31	-0.00066190	9.07345100	-0.00600567		31.00000000	1.10774194	10.05104217	0.682655
32	0.00948036	9.06775860	0.08596563		32.00000000	1.07312500	9.73083845	0.704137
33	0.01931962	9.07838060	0.17539085		33.00000000	1.04060606	9.44701787	0.725508
34	0.02943798	9.06319810	0.26680221		34.00000000	1.01000000	9.15383008	0.746904
35	0.03930477	9.07218460	0.35658014		35.00000000	0.98114286	8.90110912	0.768387
36	0.04944099	9.06497480	0.44818134		36.00000000	0.95388889	8.64697874	0.789770
37	0.05925271	9.06343460	0.53703305		37.00000000	0.92810811	8.41184714	0.811140
38	0.06939414	9.07697770	0.62988907		38.00000000	0.90368421	8.20272143	0.832512
39	0.07956088	9.06126020	0.72092180		39.00000000	0.88051282	7.97855578	0.853980
40	0.08939790	9.08374790	0.81206799		40.00000000	0.85850000	7.79839757	0.875363
41	0.09953635	9.05864520	0.90166450		41.00000000	0.83756098	7.58716771	0.896703
42	0.10935328	9.07305910	0.99216877		42.00000000	0.81761905	7.41830594	0.918094
43	0.11949397	9.05905250	1.08250215		43.00000000	0.79860465	7.23460146	0.939564
44	0.12933025	9.07727810	1.17396665		44.00000000	0.78045455	7.08440295	0.960943
45	0.13948210	9.06658740	1.26462665		45.00000000	0.76311111	6.91881358	0.982303
46	0.14930648	9.06458090	1.35340067		46.00000000	0.74652174	6.76690670	1.003675
47	0.15946056	9.07025530	1.44634799		47.00000000	0.73063830	6.62707589	1.025148
48	0.16961537	9.06680580	1.53786962		48.00000000	0.71541667	6.48654398	1.046530
49	0.17941147	9.06754880	1.62682226		49.00000000	0.70081633	6.35468624	1.067889
50	0.18956704	9.06327440	1.71809810		50.00000000	0.68680000	6.22465686	1.089256
51	0.19931847	9.06908040	1.80763523		51.00000000	0.67333333	6.10651414	1.110748
52	0.20950381	9.06528850	1.89921248		52.00000000	0.66038462	5.98657706	1.132126
53	0.21932223	9.06319430	1.98775998		53.00000000	0.64792453	5.87226589	1.153477
54	0.22944058	9.06373210	2.07958795		54.00000000	0.63592593	5.76386223	1.174863
55	0.23925380	9.07137490	2.17036092		55.00000000	0.62436364	5.66383662	1.196324
56	0.24940044	9.06907180	2.26183050		56.00000000	0.61321429	5.56128439	1.217703
57	0.25955898	9.06966300	2.35411248		57.00000000	0.60245614	5.46407417	1.239064
58	0.26936325	9.06940080	2.44296328		58.00000000	0.59206897	5.36971075	1.260427
59	0.27953669	9.06074810	2.53281153		59.00000000	0.58203390	5.27366254	1.281897
60	0.28935957	9.07004830	2.62450528		60.00000000	0.57233333	5.19109098	1.303267
61	0.29951665	9.07781510	2.71895677		61.00000000	0.56295082	5.11036345	1.324646
62	0.30931050	9.06053730	2.80251932		62.00000000	0.55387097	5.01836856	1.346004
63	0.31947127	9.05969810	2.89431326		63.00000000	0.54507937	4.93825449	1.367483
64	0.32930234	9.06260400	2.98433670		64.00000000	0.53656250	4.86265346	1.388851
65	0.33943263	9.05536940	3.07368785		65.00000000	0.52830769	4.78402131	1.410233
66	0.34924433	9.06566910	3.16613353		66.00000000	0.52030303	4.71689510	1.431716
67	0.35940510	9.07524490	3.26168930		67.00000000	0.51253731	4.65140164	1.453113
68	0.36958227	9.05635740	3.34706913		68.00000000	0.50500000	4.57346049	1.474476
69	0.37937984	9.06708620	3.43986971		69.00000000	0.49768116	4.51251797	1.495846
70	0.38951385	9.04884720	3.52465131		70.00000000	0.49057143	4.43910590	1.517331
71	0.39935309	9.07523820	3.62422442		71.00000000	0.48366197	4.38934760	1.538707
72	0.40949377	9.06419370	3.71173085		72.00000000	0.47694444	4.32311683	1.560060
73	0.41933602	9.06166740	3.79988354		73.00000000	0.47041096	4.26270765	1.581441
74	0.42944694	9.06957240	3.89490011		74.00000000	0.46405405	4.20877184	1.602923
75	0.43929362	9.05047800	3.97581724		75.00000000	0.45786667	4.14391219	1.624291
76	0.44943953	9.05587480	4.07006811		76.00000000	0.45184211	4.09182553	1.645651
77	0.45958543	9.05865000	4.16322356		77.00000000	0.44597403	4.03992261	1.667030
78	0.46942914	9.05152890	4.24905143		78.00000000	0.44025641	3.98499362	1.688505
79	0.47959289	9.05233670	4.34143632		79.00000000	0.43468354	3.93490180	1.709893
80	0.48940089	9.04333210	4.42581478		80.00000000	0.42925000	3.88185030	1.731244
81	0.49951926	9.02671340	4.50901720		81.00000000	0.42395062	3.82688072	1.752627
82	0.50934511	9.02361970	4.59613657		82.00000000	0.41878049	3.77891586	1.774123
83	0.51951337	8.99004080	4.67044639		83.00000000	0.41373494	3.71949399	1.795494
84	0.52928859	8.97419170	4.74993727		84.00000000	0.40880952	3.66873504	1.816854
85	0.53940767	8.91945170	4.81122066		85.00000000	0.40400000	3.60345849	1.838227
86	0.54954314	8.86410430	4.87120771		86.00000000	0.39930233	3.53945746	1.859710
87	0.55935562	8.76790050	4.90437442		87.00000000	0.39471264	3.46080119	1.881097
88	0.56949556	8.63940140	4.92010074		88.00000000	0.39022727	3.37133005	1.902462
89	0.57931548	8.46141910	4.90183107		89.00000000	0.38584270	3.26477676	1.923828
90	0.58943683	8.20127110	4.83413124		90.00000000	0.38155556	3.12924055	1.945302
91	0.59922469	7.86276960	4.71156568		91.00000000	0.37736264	2.96711547	1.966681
92	0.60934454	7.38100340	4.49757412		92.00000000	0.37326087	2.75503975	1.988157
93	0.61913770	6.76881170	4.19082651		93.00000000	0.36924731	2.49936552	2.009529
94	0.62923372	5.93141080	3.73224368		94.00000000	0.36531915	2.16685795	2.031026
95	0.63938707	4.82126570	3.08265495		95.00000000	0.36147368	1.74276068	2.052388
96	0.64914739	3.47650460	2.25676389		96.00000000	0.35770833	1.24357467	2.073779
97	0.65927839	1.70541390	1.12434253		97.00000000	0.35402062	0.60375168	2.095261
98	0.66900527	-0.40127259	-0.26845348		98.00000000	0.35040816	-0.14060919	2.116640
99	0.67907083	-3.03158710	-2.05866237		99.00000000	0.34686869	-1.05156264	2.137987
100	0.68877757	-6.12476400	-4.21860006		100.00000000	0.34340000	-2.10324396	2.159355
101	0.69896740	-9.90781210	-6.92523766		101.00000000	0.34000000	-3.36865611	2.180884
19:25 03/04/2018
Test Lot:	JK-PERC
Recipe:	Recipe_YJX-LID
Cell Name:	000
Test Order:	3
Test Condition:	Light
1	-0.29982066	9.06476590	-2.71780409		1.00000000	34.34000000	311.28406101	0.000000
2	-0.29005110	9.06806180	-2.63020130		2.00000000	17.17000000	155.69862111	0.061772
3	-0.27990791	9.06366630	-2.53699189		3.00000000	11.44666667	103.74876691	0.083188
4	-0.27008179	9.06832220	-2.44918869		4.00000000	8.58500000	77.85154609	0.104687
5	-0.25992221	9.05058380	-2.35244774		5.00000000	6.86800000	62.15940954	0.126211
6	-0.24977231	9.05775830	-2.26237721		6.00000000	5.72333333	51.84057000	0.147606
7	-0.23994917	9.06691740	-2.17559930		7.00000000	4.90571429	44.47970622	0.168999
8	-0.22979480	9.05261990	-2.08024498		8.00000000	4.29250000	38.85837092	0.190478
9	-0.21997760	9.06803040	-1.99476356		9.00000000	3.81555556	34.59957377	0.211852
10	-0.20985377	9.05860140	-1.90098165		10.00000000	3.43400000	31.10723721	0.233211
11	-0.20003732	9.05934720	-1.81220753		11.00000000	3.12181818	28.28163480	0.254584
12	-0.18989263	9.04880330	-1.71830106		12.00000000	2.86166667	25.89465878	0.276067
13	-0.18008883	9.07298180	-1.63394268		13.00000000	2.64153846	23.96663039	0.297435
14	-0.16994786	9.06595230	-1.54073919		14.00000000	2.45285714	22.23748586	0.318790
15	-0.16011132	9.04590320	-1.44835150		15.00000000	2.28933333	20.70908773	0.340167
16	-0.14996515	9.06577210	-1.35954987		16.00000000	2.14625000	19.45741337	0.361638
17	-0.13980483	9.05788040	-1.26633543		17.00000000	2.02000000	18.29691841	0.383026
18	-0.12995934	9.06316380	-1.17784279		18.00000000	1.90777778	17.29050249	0.404396
19	-0.11984072	9.05175210	-1.08476849		19.00000000	1.80736842	16.35985090	0.425753
20	-0.11000789	9.07295700	-0.99809686		20.00000000	1.71700000	15.57826717	0.447224
21	-0.09986470	9.04716490	-0.90349240		21.00000000	1.63523810	14.79426870	0.468592
22	-0.09005643	9.06766510	-0.81660158		22.00000000	1.56090909	14.15380089	0.490004
23	-0.07989910	9.05081270	-0.72315174		23.00000000	1.49304348	13.51325687	0.511354
24	-0.07009753	9.07376770	-0.63604869		24.00000000	1.43083333	12.98304928	0.532830
25	-0.05992531	9.06422520	-0.54317648		25.00000000	1.37360000	12.45061973	0.554222
26	-0.04980146	9.06694890	-0.45154730		26.00000000	1.32076923	11.97534712	0.575597
27	-0.03996715	9.06452270	-0.36228310		27.00000000	1.27185185	11.52872998	0.597078
28	-0.02980758	9.05605790	-0.26993914		28.00000000	1.22642857	11.10660815	0.618471
29	-0.01995465	9.07336430	-0.18105584		29.00000000	1.18413793	10.74411483	0.639820
30	-0.00984123	9.05459120	-0.08910832		30.00000000	1.14466667	10.36448873	0.661198
31	-0.00065222	9.06430720	-0.00591188		31.00000000	1.10774194	10.04091320	0.682800
32	0.00950491	9.05717280	0.08608764		32.00000000	1.07312500	9.71947856	0.704175
33	0.01929057	9.05383010	0.17465354		33.00000000	1.04060606	9.42147047	0.725525
34	0.02946995	9.06437210	0.26712656		34.00000000	1.01000000	9.15501582	0.746905
35	0.03923997	9.06493470	0.35570779		35.00000000	0.98114286	8.89399593	0.768380
36	0.04940595	9.04734990	0.44699293		36.00000000	0.95388889	8.63016654	0.789761
37	0.05920873	9.07353590	0.53723252		37.00000000	0.92810811	8.42122224	0.811115
38	0.06938438	9.05955410	0.62859155		38.00000000	0.90368421	8.18697599	0.832482
39	0.07952208	9.07351110	0.72154448		39.00000000	0.88051282	7.98934285	0.853961
40	0.08933081	9.05758670	0.80912153		40.00000000	0.85850000	7.77593818	0.875331
41	0.09948711	9.05888650	0.90124245		41.00000000	0.83756098	7.58736981	0.896681
42	0.10933156	9.06851960	0.99147539		42.00000000	0.81761905	7.41459436	0.918102
43	0.11947298	9.06821060	1.08340614		43.00000000	0.79860465	7.24191516	0.939579
44	0.12926683	9.06131170	1.17132704		44.00000000	0.78045455	7.07194190	0.960957
45	0.13941495	9.07058530	1.26457520		45.00000000	0.76311111	6.92186443	0.982309
46	0.14926535	9.05408570	1.35146127		46.00000000	0.74652174	6.75907180	1.003678
47	0.15942612	9.06201930	1.44472258		47.00000000	0.73063830	6.62105836	1.025157
48	0.16956829	9.06015870	1.53631562		48.00000000	0.71541667	6.48178854	1.046539
49	0.17939785	9.05934720	1.62522741		49.00000000	0.70081633	6.34893843	1.067941
50	0.18953554	9.06254290	1.71767396		50.00000000	0.68680000	6.22415446	1.089297
51	0.19931450	9.05967430	1.80572445		51.00000000	0.67333333	6.10018070	1.110768
52	0.20944774	9.05892370	1.89737110		52.00000000	0.66038462	5.98237384	1.132156
53	0.21928921	9.05653190	1.98599973		53.00000000	0.64792453	5.86794916	1.153550
54	0.22942765	9.05465320	2.07738781		54.00000000	0.63592593	5.75808872	1.174898
55	0.23922075	9.06180570	2.16777196		55.00000000	0.62436364	5.65786196	1.196371
56	0.24940310	9.05983640	2.25955128		56.00000000	0.61321429	5.55562111	1.217755
57	0.25956240	9.06852440	2.35384796		57.00000000	0.60245614	5.46338821	1.239139
58	0.26938748	9.06580920	2.44221549		58.00000000	0.59206897	5.36758427	1.260631
59	0.27951699	9.06017210	2.53247203		59.00000000	0.58203390	5.27332729	1.282019
60	0.28933540	9.05456450	2.61980604		60.00000000	0.57233333	5.18222908	1.303368
61	0.29948649	9.06021690	2.71341256		61.00000000	0.56295082	5.10045653	1.324743
62	0.30929971	9.05282690	2.80003673		62.00000000	0.55387097	5.01409800	1.346230
63	0.31946120	9.06456570	2.89577704		63.00000000	0.54507937	4.94090772	1.367601
64	0.32928184	9.06170560	2.98385509		64.00000000	0.53656250	4.86217141	1.388953
65	0.33939797	9.04386520	3.06946949		65.00000000	0.52830769	4.77794355	1.410339
66	0.34922308	9.07076550	3.16772067		66.00000000	0.52030303	4.71954678	1.431817
67	0.35936448	9.05989460	3.25580431		67.00000000	0.51253731	4.64353404	1.453198
68	0.36952972	9.04385190	3.34197206		68.00000000	0.50500000	4.56714521	1.474541
69	0.37934515	9.05855270	3.43631803		69.00000000	0.49768116	4.50827101	1.495910
70	0.38948581	9.04545400	3.52307598		70.00000000	0.49057143	4.43744129	1.517386
71	0.39932731	9.06458090	3.61973471		71.00000000	0.48366197	4.38419307	1.538769
72	0.40946424	9.04808900	3.70486889		72.00000000	0.47694444	4.31543578	1.560113
73	0.41928786	9.05142210	3.79515140		73.00000000	0.47041096	4.25788815	1.581493
74	0.42943004	9.05120470	3.88685920		74.00000000	0.46405405	4.20024824	1.602977
75	0.43926406	9.05782510	3.97877703		75.00000000	0.45786667	4.14727619	1.624350
76	0.44942036	9.04460330	4.06482887		76.00000000	0.45184211	4.08673260	1.645710
77	0.45950893	9.05269720	4.15979520		77.00000000	0.44597403	4.03726782	1.667083
78	0.46941516	9.05056380	4.24847185		78.00000000	0.44025641	3.98456873	1.688557
79	0.47954839	9.04045580	4.33533602		79.00000000	0.43468354	3.92973737	1.709944
80	0.48935786	9.03391550	4.42081756		80.00000000	0.42925000	3.87780823	1.731312
81	0.49949631	9.03093150	4.51091696		81.00000000	0.42395062	3.82866898	1.752680
82	0.50935340	9.00860790	4.58856506		82.00000000	0.41878049	3.77262921	1.774155
83	0.51947325	8.98726270	4.66864256		83.00000000	0.41373494	3.71834459	1.795525
84	0.52924478	8.95073030	4.73712729		84.00000000	0.40880952	3.65914379	1.816908
85	0.53937501	8.91546060	4.80877665		85.00000000	0.40400000	3.60184608	1.838249
86	0.54954767	8.84291930	4.85960570		86.00000000	0.39930233	3.53099824	1.859723
87	0.55933857	8.74419310	4.89096446		87.00000000	0.39471264	3.45144358	1.881117
88	0.56951421	8.63461880	4.91753810		88.00000000	0.39022727	3.36946375	1.902511
89	0.57930809	8.43500420	4.88646617		89.00000000	0.38584270	3.25458477	1.923991
90	0.58944649	8.18568420	4.82502282		90.00000000	0.38155556	3.12329328	1.945370
91	0.59923738	7.83142280	4.69288128		91.00000000	0.37736264	2.95528636	1.966721
92	0.60934532	7.36668730	4.48885643		92.00000000	0.37326087	2.74969611	1.988189
93	0.61915475	6.72435470	4.16341615		93.00000000	0.36924731	2.48294990	2.009694
94	0.62924188	5.88582130	3.70360526		94.00000000	0.36531915	2.15020323	2.031089
95	0.63936764	4.78909060	3.06198955		95.00000000	0.36147368	1.73113022	2.052447
96	0.64913839	3.46163150	2.24707790		96.00000000	0.35770833	1.23825443	2.073830
97	0.65926641	1.72710800	1.13862429		97.00000000	0.35402062	0.61143184	2.095314
98	0.66895235	-0.32835665	-0.21965495		98.00000000	0.35040816	-0.11505885	2.116702
99	0.67904687	-2.86685490	-1.94672885		99.00000000	0.34686869	-0.99442219	2.138118
100	0.68878490	-5.82013560	-4.00882152		100.00000000	0.34340000	-1.99863457	2.159505
101	0.69910794	-9.45317840	-6.60879208		101.00000000	0.34000000	-3.21408066	2.180985
19:25 03/04/2018
Test Lot:	JK-PERC
Recipe:	Recipe_YJX-LID
Cell Name:	000
Test Order:	4
Test Condition:	Light
1	-0.29984307	9.06115720	-2.71692519		1.00000000	34.34000000	311.16013825	0.000000
2	-0.29002067	9.06720160	-2.62967588		2.00000000	17.17000000	155.68385147	0.061797
3	-0.27986258	9.07175450	-2.53884462		3.00000000	11.44666667	103.84134984	0.083234
4	-0.27006325	9.06179430	-2.44725762		4.00000000	8.58500000	77.79550407	0.104761
5	-0.25988805	9.05925660	-2.35439253		5.00000000	6.86800000	62.21897433	0.126156
6	-0.24971509	9.06804470	-2.26442760		6.00000000	5.72333333	51.89944250	0.147557
7	-0.23990905	9.06196780	-2.17404809		7.00000000	4.90571429	44.45542489	0.168944
8	-0.22977404	9.05795100	-2.08128200		8.00000000	4.29250000	38.88125467	0.190428
9	-0.21995981	9.05891900	-1.99259810		9.00000000	3.81555556	34.56480872	0.211805
10	-0.20978461	9.06044770	-1.90074249		10.00000000	3.43400000	31.11357740	0.233196
11	-0.19997261	9.05153750	-1.81005958		11.00000000	3.12181818	28.25725434	0.254556
12	-0.18984878	9.07229520	-1.72236418		12.00000000	2.86166667	25.96188476	0.276038
13	-0.18005167	9.05145450	-1.62972950		13.00000000	2.64153846	23.90976519	0.297420
14	-0.16988763	9.08122830	-1.54278835		14.00000000	2.45285714	22.27495570	0.318805
15	-0.16010541	9.03993420	-1.44734237		15.00000000	2.28933333	20.69542270	0.340269
16	-0.14991681	9.06858540	-1.35953339		16.00000000	2.14625000	19.46345141	0.361726
17	-0.13978627	9.05476570	-1.26573192		17.00000000	2.02000000	18.29062671	0.383107
18	-0.12999140	9.07214640	-1.17930101		18.00000000	1.90777778	17.30763930	0.404488
19	-0.11983182	9.04849910	-1.08429812		19.00000000	1.80736842	16.35397153	0.425819
20	-0.11001612	9.06478690	-0.99727268		20.00000000	1.71700000	15.56423911	0.447312
21	-0.09986696	9.05315690	-0.90411129		21.00000000	1.63523810	14.80406705	0.468705
22	-0.09001776	9.06317620	-0.81584680		22.00000000	1.56090909	14.14679412	0.490101
23	-0.07989912	9.06855490	-0.72456953		23.00000000	1.49304348	13.53974675	0.511461
24	-0.07005662	9.05062010	-0.63405583		24.00000000	1.43083333	12.94992893	0.532929
25	-0.05993724	9.05671310	-0.54283434		25.00000000	1.37360000	12.44030111	0.554306
26	-0.04977543	9.06757550	-0.45134246		26.00000000	1.32076923	11.97617472	0.575685
27	-0.03996865	9.05284120	-0.36182981		27.00000000	1.27185185	11.51387284	0.597052
28	-0.02979940	9.05459880	-0.26982161		28.00000000	1.22642857	11.10481867	0.618524
29	-0.01996210	9.06116200	-0.18087986		29.00000000	1.18413793	10.72966562	0.639918
30	-0.00983975	9.06396770	-0.08918713		30.00000000	1.14466667	10.37522169	0.661310
31	-0.00062691	9.06081490	-0.00568032		31.00000000	1.10774194	10.03704463	0.682900
32	0.00951906	9.06852530	0.08632380		32.00000000	1.07312500	9.73166121	0.704294
33	0.01928760	9.05746360	0.17469673		33.00000000	1.04060606	9.42525152	0.725650
34	0.02947963	9.05333520	0.26688897		34.00000000	1.01000000	9.14386855	0.747019
35	0.03930399	9.06257530	0.35619539		35.00000000	0.98114286	8.89168102	0.768501
36	0.04945063	9.05020240	0.44753817		36.00000000	0.95388889	8.63288751	0.789873
37	0.05926829	9.06727700	0.53740198		37.00000000	0.92810811	8.41541330	0.811217
38	0.06942757	9.05861850	0.62891789		38.00000000	0.90368421	8.18613051	0.832592
39	0.07958835	9.06579300	0.72153147		39.00000000	0.88051282	7.98254696	0.854072
40	0.08939782	9.04357720	0.80847607		40.00000000	0.85850000	7.76391103	0.875459
41	0.09955264	9.07124520	0.90306640		41.00000000	0.83756098	7.59772098	0.896809
42	0.10933011	9.05067630	0.98951144		42.00000000	0.81761905	7.40000534	0.918174
43	0.11949758	9.06244560	1.08294032		43.00000000	0.79860465	7.23731121	0.939656
44	0.12931822	9.04870610	1.17016257		44.00000000	0.78045455	7.06210381	0.961045
45	0.13947900	9.07308960	1.26550546		45.00000000	0.76311111	6.92377549	0.982390
46	0.14926837	9.05948160	1.35229405		46.00000000	0.74652174	6.76309996	1.003769
47	0.15943511	9.06179140	1.44476771		47.00000000	0.73063830	6.62089184	1.025249
48	0.16955344	9.04801650	1.53412232		48.00000000	0.71541667	6.47310180	1.046622
49	0.17942321	9.05948640	1.62548213		49.00000000	0.70081633	6.34903598	1.067974
50	0.18955943	9.05505370	1.71647082		50.00000000	0.68680000	6.21901088	1.089349
51	0.19933988	9.05973530	1.80596655		51.00000000	0.67333333	6.10022177	1.110837
52	0.20945004	9.05394080	1.89634826		52.00000000	0.66038462	5.97908321	1.132239
53	0.21931086	9.05580330	1.98603601		53.00000000	0.64792453	5.86747708	1.153602
54	0.22942103	9.06261730	2.07915500		54.00000000	0.63592593	5.76315330	1.174957
55	0.23926549	9.05214690	2.16586636		55.00000000	0.62436364	5.65183136	1.196434
56	0.24938831	9.06932070	2.26178256		56.00000000	0.61321429	5.56143701	1.217806
57	0.25954834	9.04747770	2.34825782		57.00000000	0.60245614	5.45070850	1.239182
58	0.26939204	9.06324290	2.44156549		58.00000000	0.59206897	5.36606485	1.260555
59	0.27954164	9.06058120	2.53280973		59.00000000	0.58203390	5.27356540	1.282030
60	0.28934219	9.06346700	2.62244339		60.00000000	0.57233333	5.18732428	1.303452
61	0.29951635	9.06619550	2.71547378		61.00000000	0.56295082	5.10382219	1.324836
62	0.30933627	9.05507760	2.80106393		62.00000000	0.55387097	5.01534459	1.346314
63	0.31944343	9.06098370	2.89447171		63.00000000	0.54507937	4.93895524	1.367698
64	0.32929608	9.04857250	2.97965945		64.00000000	0.53656250	4.85512468	1.389046
65	0.33942187	9.05857180	3.07467738		65.00000000	0.52830769	4.78571316	1.410414
66	0.34922838	9.05655290	3.16280530		66.00000000	0.52030303	4.71215192	1.431889
67	0.35940179	9.04823680	3.25195250		67.00000000	0.51253731	4.63755898	1.453265
68	0.36957598	9.05558490	3.34672666		68.00000000	0.50500000	4.57307037	1.474610
69	0.37940407	9.05000400	3.43360835		69.00000000	0.49768116	4.50401648	1.495976
70	0.38953432	9.05442810	3.52701049		70.00000000	0.49057143	4.44184373	1.517462
71	0.39938027	9.04928970	3.61410776		71.00000000	0.48366197	4.37679730	1.538826
72	0.40948522	9.05822470	3.70920913		72.00000000	0.47694444	4.32026995	1.560180
73	0.41933563	9.04620740	3.79339708		73.00000000	0.47041096	4.25543510	1.581549
74	0.42948896	9.05472370	3.88890387		74.00000000	0.46405405	4.20188124	1.603025
75	0.43931332	9.05097680	3.97621467		75.00000000	0.45786667	4.14414058	1.624421
76	0.44947261	9.05083180	4.06810099		76.00000000	0.45184211	4.08954689	1.645772
77	0.45956713	9.04439160	4.15650509		77.00000000	0.44597403	4.03356373	1.667160
78	0.46946666	9.04174140	4.24479614		78.00000000	0.44025641	3.98068461	1.688650
79	0.47959617	9.04465870	4.33778367		79.00000000	0.43468354	3.93156430	1.710022
80	0.48941681	9.02125840	4.41515551		80.00000000	0.42925000	3.87237517	1.731385
81	0.49955824	9.01595120	4.50399271		81.00000000	0.42395062	3.82231808	1.752769
82	0.50937742	9.00381370	4.58633939		82.00000000	0.41878049	3.77062149	1.774239
83	0.51951659	8.97909640	4.66478954		83.00000000	0.41373494	3.71496591	1.795621
84	0.52929628	8.96583080	4.74558089		84.00000000	0.40880952	3.66531702	1.816981
85	0.53940868	8.89974590	4.80060019		85.00000000	0.40400000	3.59549734	1.838340
86	0.54953301	8.84519290	4.86072548		86.00000000	0.39930233	3.53190610	1.859813
87	0.55938858	8.74409960	4.89134946		87.00000000	0.39471264	3.45140667	1.881200
88	0.56949651	8.61927600	4.90864760		88.00000000	0.39022727	3.36347657	1.902626
89	0.57932389	8.41926480	4.87748123		89.00000000	0.38584270	3.24851183	1.923993
90	0.58945191	8.16098210	4.81050649		90.00000000	0.38155556	3.11386806	1.945486
91	0.59924126	7.83775760	4.69670774		91.00000000	0.37736264	2.95767688	1.966861
92	0.60935742	7.34015700	4.47277913		92.00000000	0.37326087	2.73979338	1.988332
93	0.61917955	6.72887230	4.16638012		93.00000000	0.36924731	2.48461801	2.009836
94	0.62926960	5.87877660	3.69933540		94.00000000	0.36531915	2.14762966	2.031228
95	0.63939685	4.79971310	3.06892144		95.00000000	0.36147368	1.73496998	2.052586
96	0.64916468	3.44633560	2.23723935		96.00000000	0.35770833	1.23278296	2.073956
97	0.65928376	1.72017860	1.13408582		97.00000000	0.35402062	0.60897869	2.095555
98	0.66900915	-0.32123840	-0.21491143		98.00000000	0.35040816	-0.11256456	2.116973
99	0.67908877	-2.85696130	-1.94013034		99.00000000	0.34686869	-0.99099041	2.138338
100	0.68881714	-5.79609390	-3.99244882		100.00000000	0.34340000	-1.99037865	2.159733
101	0.69909996	-9.37457940	-6.55376808		101.00000000	0.34000000	-3.18735700	2.181208
23:33 03/04/2018
Test Lot:	JK-PERC
Recipe:	Recipe_YJX-LID
Cell Name:	000
Test Order:	2
Test Condition:	Light
1	-0.29992494	9.08461000	-2.72470111		1.00000000	34.34000000	311.96550740	0.000000
2	-0.29014248	9.08767220	-2.63671975		2.00000000	17.17000000	156.03533167	0.061787
3	-0.28000429	9.08496380	-2.54382884		3.00000000	11.44666667	103.99255230	0.083213
4	-0.27017346	9.08310790	-2.45401469		4.00000000	8.58500000	77.97848132	0.104703
5	-0.26001886	9.09159760	-2.36398684		5.00000000	6.86800000	62.44109232	0.126080
6	-0.24988066	9.09231380	-2.27199337		6.00000000	5.72333333	52.03834265	0.147431
7	-0.24003568	9.08384900	-2.18044787		7.00000000	4.90571429	44.56276781	0.168803
8	-0.22987664	9.08529760	-2.08849769		8.00000000	4.29250000	38.99863995	0.190401
9	-0.22004879	9.09485050	-2.00131085		9.00000000	3.81555556	34.70190735	0.211806
10	-0.20990090	9.06856820	-1.90350063		10.00000000	3.43400000	31.14146320	0.233151
11	-0.20008272	9.10786440	-1.82232628		11.00000000	3.12181818	28.43309668	0.254520
12	-0.18993187	9.08060460	-1.72469621		12.00000000	2.86166667	25.98566350	0.276016
13	-0.18012410	9.08195110	-1.63587827		13.00000000	2.64153846	23.99032314	0.297394
14	-0.16998589	9.07921120	-1.54333780		14.00000000	2.45285714	22.27000804	0.318745
15	-0.16015878	9.09177590	-1.45612774		15.00000000	2.28933333	20.81410563	0.340129
16	-0.15004514	9.08845330	-1.36367825		16.00000000	2.14625000	19.50609290	0.361611
17	-0.13989651	9.09296130	-1.27207355		17.00000000	2.02000000	18.36778183	0.383005
18	-0.13006195	9.08419420	-1.18150801		18.00000000	1.90777778	17.33062382	0.404367
19	-0.11992002	9.08545110	-1.08952748		19.00000000	1.80736842	16.42075741	0.425727
20	-0.11010036	9.08507060	-1.00026954		20.00000000	1.71700000	15.59906622	0.447204
21	-0.09991749	9.09082510	-0.90833246		21.00000000	1.63523810	14.86566352	0.468587
22	-0.09010155	9.09035400	-0.81905497		22.00000000	1.56090909	14.18921620	0.489974
23	-0.08000948	9.06904890	-0.72560991		23.00000000	1.49304348	13.54048431	0.511331
24	-0.07021066	9.10274120	-0.63910945		24.00000000	1.43083333	13.02450553	0.532810
25	-0.06000546	9.08096500	-0.54490752		25.00000000	1.37360000	12.47361352	0.554190
26	-0.04990745	9.09084130	-0.45370067		26.00000000	1.32076923	12.00690347	0.575575
27	-0.04006024	9.08189770	-0.36382301		27.00000000	1.27185185	11.55082841	0.597069
28	-0.02991087	9.09161280	-0.27193803		28.00000000	1.22642857	11.15021370	0.618502
29	-0.02009046	9.08110520	-0.18244355		29.00000000	1.18413793	10.75328112	0.639859
30	-0.00996341	9.09103490	-0.09057772		30.00000000	1.14466667	10.40620462	0.661232
31	-0.00069672	9.07311440	-0.00632146		31.00000000	1.10774194	10.05066931	0.682833
32	0.00944723	9.08294960	0.08580873		32.00000000	1.07312500	9.74714029	0.704227
33	0.01922346	9.08539580	0.17465270		33.00000000	1.04060606	9.45431793	0.725575
34	0.02939784	9.08583640	0.26710398		34.00000000	1.01000000	9.17669476	0.746962
35	0.03922095	9.08218190	0.35621181		35.00000000	0.98114286	8.91091790	0.768451
36	0.04938864	9.09221360	0.44905206		36.00000000	0.95388889	8.67296153	0.789830
37	0.05918272	9.07903770	0.53732216		37.00000000	0.92810811	8.42632850	0.811182
38	0.06935116	9.08899400	0.63033227		38.00000000	0.90368421	8.21358037	0.832557
39	0.07949354	9.08188440	0.72195112		39.00000000	0.88051282	7.99671565	0.854038
40	0.08932186	9.08902260	0.81184840		40.00000000	0.85850000	7.80292590	0.875427
41	0.09949848	9.07676120	0.90312395		41.00000000	0.83756098	7.60234097	0.896776
42	0.10930149	9.08408930	0.99290450		42.00000000	0.81761905	7.42732444	0.918142
43	0.11945727	9.07351020	1.08389676		43.00000000	0.79860465	7.24614745	0.939636
44	0.12928633	9.09445290	1.17578844		44.00000000	0.78045455	7.09780710	0.961025
45	0.13941905	9.08618550	1.26678735		45.00000000	0.76311111	6.93376911	0.982386
46	0.14924438	9.06795880	1.35334189		46.00000000	0.74652174	6.76942837	1.003763
47	0.15940389	9.09728720	1.45014297		47.00000000	0.73063830	6.64682644	1.025242
48	0.16952172	9.08461860	1.54004017		48.00000000	0.71541667	6.49928756	1.046632
49	0.17935747	9.09012410	1.63038166		49.00000000	0.70081633	6.37050738	1.068000
50	0.18952516	9.07551100	1.72003767		50.00000000	0.68680000	6.23306095	1.089370
51	0.19929394	9.09528060	1.81263431		51.00000000	0.67333333	6.12415560	1.110851
52	0.20944080	9.08160400	1.90205841		52.00000000	0.66038462	5.99735156	1.132218
53	0.21923710	9.07556250	1.98970000		53.00000000	0.64792453	5.88027955	1.153590
54	0.22941448	9.08546640	2.08433755		54.00000000	0.63592593	5.77768363	1.174937
55	0.23919666	9.08729840	2.17365143		55.00000000	0.62436364	5.67377867	1.196422
56	0.24937104	9.08055110	2.26442647		56.00000000	0.61321429	5.56832366	1.217817
57	0.25949034	9.08351520	2.35708445		57.00000000	0.60245614	5.47241951	1.239213
58	0.26930305	9.07067110	2.44275939		58.00000000	0.59206897	5.37046285	1.260692
59	0.27947000	9.08883190	2.54005585		59.00000000	0.58203390	5.29000826	1.282110
60	0.28931022	9.07884030	2.62660128		60.00000000	0.57233333	5.19612293	1.303455
61	0.29944143	9.08463190	2.72031517		61.00000000	0.56295082	5.11420097	1.324832
62	0.30928388	9.07968330	2.80819968		62.00000000	0.55387097	5.02897298	1.346316
63	0.31942701	9.08299920	2.90135528		63.00000000	0.54507937	4.95095544	1.367701
64	0.32923675	9.08405110	2.99080346		64.00000000	0.53656250	4.87416117	1.389052
65	0.33937168	9.08523080	3.08327004		65.00000000	0.52830769	4.79979732	1.410432
66	0.34918958	9.07875060	3.17020511		66.00000000	0.52030303	4.72370145	1.431911
67	0.35936990	9.08882050	3.26624851		67.00000000	0.51253731	4.65835964	1.453295
68	0.36948624	9.07854180	3.35439627		68.00000000	0.50500000	4.58466361	1.474655
69	0.37931904	9.08782770	3.44718608		69.00000000	0.49768116	4.52284063	1.496038
70	0.38948226	9.07962800	3.53635403		70.00000000	0.49057143	4.45420608	1.517515
71	0.39932024	9.07922740	3.62551926		71.00000000	0.48366197	4.39127703	1.538905
72	0.40945148	9.09325500	3.72324672		72.00000000	0.47694444	4.33697745	1.560248
73	0.41928574	9.07929800	3.80682018		73.00000000	0.47041096	4.27100128	1.581622
74	0.42941251	9.07385350	3.89642621		74.00000000	0.46405405	4.21075850	1.603115
75	0.43925199	9.08436970	3.99032747		75.00000000	0.45786667	4.15943007	1.624487
76	0.44938245	9.07706830	4.07907519		76.00000000	0.45184211	4.10140165	1.645848
77	0.45955685	9.07822800	4.17196186		77.00000000	0.44597403	4.04865389	1.667229
78	0.46939111	9.06927780	4.25703837		78.00000000	0.44025641	3.99280769	1.688704
79	0.47952682	9.05961130	4.34432660		79.00000000	0.43468354	3.93806395	1.710112
80	0.48934993	9.05377010	4.43046176		80.00000000	0.42925000	3.88633082	1.731476
81	0.49948934	9.04680730	4.51878381		81.00000000	0.42395062	3.83539954	1.752839
82	0.50931466	9.03901670	4.60370372		82.00000000	0.41878049	3.78536382	1.774319
83	0.51946002	9.00908280	4.67985833		83.00000000	0.41373494	3.72737233	1.795697
84	0.52925485	8.98609070	4.75593209		84.00000000	0.40880952	3.67359946	1.817084
85	0.53939056	8.93650050	4.82026401		85.00000000	0.40400000	3.61034620	1.838438
86	0.54954708	8.86828990	4.87354282		86.00000000	0.39930233	3.54112878	1.859911
87	0.55933076	8.78697400	4.91482485		87.00000000	0.39471264	3.46832974	1.881296
88	0.56947088	8.65548800	4.92904837		88.00000000	0.39022727	3.37760748	1.902674
89	0.57929176	8.47188380	4.90769248		89.00000000	0.38584270	3.26881449	1.924160
90	0.58939546	8.22708700	4.84900773		90.00000000	0.38155556	3.13909075	1.945546
91	0.59919477	7.87026790	4.71582336		91.00000000	0.37736264	2.96994505	1.966903
92	0.60930288	7.40646740	4.51278192		92.00000000	0.37326087	2.76454446	1.988372
93	0.61911333	6.76919170	4.19089681		93.00000000	0.36924731	2.49950584	2.009890
94	0.62919545	5.92834470	3.73008751		94.00000000	0.36531915	2.16573784	2.031275
95	0.63935274	4.82968090	3.08786972		95.00000000	0.36147368	1.74580255	2.052620
96	0.64912152	3.49517230	2.26879156		96.00000000	0.35770833	1.25025226	2.074000
97	0.65921772	1.75163810	1.15471087		97.00000000	0.35402062	0.62011600	2.095492
98	0.66892326	-0.30597135	-0.20467135		98.00000000	0.35040816	-0.10721486	2.116867
99	0.67903292	-2.88569090	-1.95947912		99.00000000	0.34686869	-1.00095581	2.138223
100	0.68876672	-5.87803460	-4.04859461		100.00000000	0.34340000	-2.01851708	2.159609
101	0.69906014	-9.55512620	-6.67960786		101.00000000	0.34000000	-3.24874291	2.181093
23:33 03/04/2018
Test Lot:	JK-PERC
Recipe:	Recipe_YJX-LID
Cell Name:	000
Test Order:	3
Test Condition:	Light
1	-0.29991972	9.09340190	-2.72729055		1.00000000	34.34000000	312.26742125	0.000000
2	-0.29007626	9.07408050	-2.63217533		2.00000000	17.17000000	155.80196219	0.021578
3	-0.27998194	9.08677770	-2.54413365		3.00000000	11.44666667	104.01331541	0.042965
4	-0.27016601	9.08906940	-2.45555761		4.00000000	8.58500000	78.02966080	0.064391
5	-0.26004639	9.07738020	-2.36053995		5.00000000	6.86800000	62.34344721	0.085766
6	-0.24989034	9.06812570	-2.26603701		6.00000000	5.72333333	51.89990609	0.107263
7	-0.24007960	9.08799460	-2.18184211		7.00000000	4.90571429	44.58310494	0.128653
8	-0.22990417	9.07689480	-2.08681597		8.00000000	4.29250000	38.96257093	0.150033
9	-0.22005771	9.07790280	-1.99766250		9.00000000	3.81555556	34.63724246	0.171512
10	-0.20992620	9.07803630	-1.90571766		10.00000000	3.43400000	31.17397665	0.192903
11	-0.20009761	9.08398440	-1.81768357		11.00000000	3.12181818	28.35854766	0.214299
12	-0.18996982	9.08553120	-1.72597673		12.00000000	2.86166667	25.99976178	0.235689
13	-0.18017173	9.08051780	-1.63605260		13.00000000	2.64153846	23.98653702	0.257174
14	-0.17003353	9.08405400	-1.54459377		14.00000000	2.45285714	22.28188674	0.278543
15	-0.16019450	9.08190820	-1.45487174		15.00000000	2.28933333	20.79151517	0.299879
16	-0.15005928	9.07744690	-1.36215515		16.00000000	2.14625000	19.48247041	0.321261
17	-0.13989651	9.08389570	-1.27080531		17.00000000	2.02000000	18.34946931	0.342735
18	-0.13008428	9.07631400	-1.18068577		18.00000000	1.90777778	17.31559015	0.364121
19	-0.11992077	9.08556270	-1.08954767		19.00000000	1.80736842	16.42095911	0.385472
20	-0.11012269	9.06998540	-0.99881119		20.00000000	1.71700000	15.57316493	0.406852
21	-0.09999044	9.08857540	-0.90877061		21.00000000	1.63523810	14.86198473	0.428328
22	-0.09011272	9.09144880	-0.81925514		22.00000000	1.56090909	14.19092508	0.449707
23	-0.08001246	9.08774570	-0.72713292		23.00000000	1.49304348	13.56839945	0.471059
24	-0.07014219	9.07295610	-0.63639698		24.00000000	1.43083333	12.98188802	0.492439
25	-0.06003226	9.08765700	-0.54555255		25.00000000	1.37360000	12.48280566	0.513932
26	-0.04983898	9.07642080	-0.45235951		26.00000000	1.32076923	11.98785732	0.535301
27	-0.04004089	9.09028910	-0.36398328		27.00000000	1.27185185	11.56150103	0.556664
28	-0.02989524	9.08268070	-0.27152891		28.00000000	1.22642857	11.13925912	0.578033
29	-0.02002684	9.08492180	-0.18194223		29.00000000	1.18413793	10.75780050	0.599499
30	-0.00991376	9.08678630	-0.09008419		30.00000000	1.14466667	10.40134138	0.661118
31	-0.00063202	9.08314800	-0.00574076		31.00000000	1.10774194	10.06178395	0.682725
32	0.00947489	9.07066820	0.08594362		32.00000000	1.07312500	9.73396081	0.704105
33	0.01930859	9.08244510	0.17536924		33.00000000	1.04060606	9.45124742	0.725477
34	0.02944818	9.08075330	0.26741162		34.00000000	1.01000000	9.17156083	0.746850
35	0.03923796	9.09240720	0.35676752		35.00000000	0.98114286	8.92095038	0.768330
36	0.04936192	9.06084160	0.44726052		36.00000000	0.95388889	8.64303613	0.789717
37	0.05924101	9.09600640	0.53885662		37.00000000	0.92810811	8.44207729	0.811093
38	0.06935678	9.07048420	0.62909955		38.00000000	0.90368421	8.19685335	0.832437
39	0.07953060	9.07625870	0.72184027		39.00000000	0.88051282	7.99176215	0.853912
40	0.08933676	9.08345790	0.81148670		40.00000000	0.85850000	7.79814861	0.875275
41	0.09949271	9.08027550	0.90342125		41.00000000	0.83756098	7.60528441	0.896650
42	0.10932121	9.06893060	0.99142647		42.00000000	0.81761905	7.41493040	0.918136
43	0.11947418	9.08621030	1.08556752		43.00000000	0.79860465	7.25628981	0.939504
44	0.12927736	9.08328820	1.17426352		44.00000000	0.78045455	7.08909356	0.960875
45	0.13943332	9.08102700	1.26619774		45.00000000	0.76311111	6.92983260	0.982262
46	0.14926553	9.09116840	1.35699807		46.00000000	0.74652174	6.78675484	1.003746
47	0.15941627	9.07693770	1.44701155		47.00000000	0.73063830	6.63195831	1.025131
48	0.16952683	9.06497000	1.53675563		48.00000000	0.71541667	6.48523062	1.046489
49	0.17938733	9.09364510	1.63128471		49.00000000	0.70081633	6.37297495	1.067874
50	0.18952692	9.06731510	1.71850030		50.00000000	0.68680000	6.22743201	1.089348
51	0.19930777	9.09488680	1.81268161		51.00000000	0.67333333	6.12389045	1.110742
52	0.20946968	9.06788060	1.89944605		52.00000000	0.66038462	5.98828884	1.132089
53	0.21926765	9.09308620	1.99381964		53.00000000	0.64792453	5.89163359	1.153465
54	0.22938862	9.06062980	2.07840537		54.00000000	0.63592593	5.76188940	1.174944
55	0.23924987	9.08517070	2.17362591		55.00000000	0.62436364	5.67245022	1.196312
56	0.24940358	9.07604980	2.26359931		56.00000000	0.61321429	5.56556340	1.217675
57	0.25955507	9.08336830	2.35763429		57.00000000	0.60245614	5.47233101	1.239055
58	0.26938653	9.07181640	2.44382514		58.00000000	0.59206897	5.37114095	1.260536
59	0.27951720	9.08943650	2.54065384		59.00000000	0.58203390	5.29036016	1.281926
60	0.28934345	9.08193970	2.62779977		60.00000000	0.57233333	5.19789682	1.303281
61	0.29948080	9.06523230	2.71486302		61.00000000	0.56295082	5.10327995	1.324660
62	0.30928251	9.07310960	2.80615411		62.00000000	0.55387097	5.02533199	1.346145
63	0.31942728	9.07639690	2.89924877		63.00000000	0.54507937	4.94735666	1.367529
64	0.32927141	9.07425120	2.98789149		64.00000000	0.53656250	4.86890291	1.388901
65	0.33941844	9.07235150	3.07932339		65.00000000	0.52830769	4.79299308	1.410260
66	0.34921938	9.08448120	3.17247689		66.00000000	0.52030303	4.72668310	1.431741
67	0.35939023	9.06586650	3.25818385		67.00000000	0.51253731	4.64659486	1.453127
68	0.36954618	9.08520410	3.35740247		68.00000000	0.50500000	4.58802807	1.474521
69	0.37937245	9.07822320	3.44402778		69.00000000	0.49768116	4.51806065	1.495864
70	0.38951278	9.07629680	3.53533360		70.00000000	0.49057143	4.45257189	1.517335
71	0.39932486	9.07367040	3.62334216		71.00000000	0.48366197	4.38858932	1.538711
72	0.40948904	9.09169290	3.72294860		72.00000000	0.47694444	4.33623242	1.560084
73	0.41930634	9.07558440	3.80545008		73.00000000	0.47041096	4.26925436	1.581568
74	0.42943254	9.07960510	3.89907788		74.00000000	0.46405405	4.21342756	1.602992
75	0.43926251	9.07723520	3.98728912		75.00000000	0.45786667	4.15616342	1.624339
76	0.44942069	9.06834130	4.07550020		76.00000000	0.45184211	4.09745842	1.645724
77	0.45956847	9.07155230	4.16899941		77.00000000	0.44597403	4.04567670	1.667200
78	0.46942672	9.06417560	4.25496622		78.00000000	0.44025641	3.99056141	1.688574
79	0.47957227	9.06148240	4.34563568		79.00000000	0.43468354	3.93887729	1.709933
80	0.48936874	9.05503180	4.43124950		80.00000000	0.42925000	3.88687240	1.731312
81	0.49950388	9.05045410	4.52073694		81.00000000	0.42395062	3.83694560	1.752790
82	0.50931674	9.03288270	4.60059837		82.00000000	0.41878049	3.78279502	1.774172
83	0.51948684	9.00199130	4.67641601		83.00000000	0.41373494	3.72443833	1.795512
84	0.52927512	8.97242160	4.74887952		84.00000000	0.40880952	3.66801140	1.816891
85	0.53938717	8.93862340	4.82137878		85.00000000	0.40400000	3.61120385	1.838370
86	0.54952598	8.86548710	4.87181549		86.00000000	0.39930233	3.54000962	1.859758
87	0.55939317	8.78251460	4.91287868		87.00000000	0.39471264	3.46656956	1.881117
88	0.56947547	8.64107130	4.92087814		88.00000000	0.39022727	3.37198169	1.902493
89	0.57932705	8.45608900	4.89884109		89.00000000	0.38584270	3.26272018	1.923975
90	0.58940631	8.20378020	4.83535982		90.00000000	0.38155556	3.13019791	1.945351
91	0.59924525	7.85092690	4.70463065		91.00000000	0.37736264	2.96264648	1.966700
92	0.60936773	7.37741370	4.49555784		92.00000000	0.37326087	2.75369985	1.988186
93	0.61917388	6.74819140	4.17830385		93.00000000	0.36924731	2.49175153	2.009701
94	0.62927550	5.91561030	3.72254863		94.00000000	0.36531915	2.16108572	2.031080
95	0.63941133	4.82751080	3.08676510		95.00000000	0.36147368	1.74501811	2.052451
96	0.64916986	3.47235490	2.25414814		96.00000000	0.35770833	1.24209028	2.073819
97	0.65927970	1.76753040	1.16529691		97.00000000	0.35402062	0.62574221	2.095304
98	0.66899359	-0.26693723	-0.17857930		98.00000000	0.35040816	-0.09353698	2.116704
99	0.67908925	-2.79510310	-1.89812447		99.00000000	0.34686869	-0.96953374	2.138082
100	0.68876666	-5.71246430	-3.93455496		100.00000000	0.34340000	-1.96166024	2.159430
101	0.69904166	-9.26551820	-6.47698322		101.00000000	0.34000000	-3.15027619	2.180916
23:33 03/04/2018
Test Lot:	JK-PERC
Recipe:	Recipe_YJX-LID
Cell Name:	000
Test Order:	4
Test Condition:	Light
1	-0.29996103	9.08618640	-2.72550183		1.00000000	34.34000000	312.01964098	0.000000
2	-0.29014415	9.08868790	-2.63702963		2.00000000	17.17000000	156.05277124	0.061804
3	-0.27999982	9.07590580	-2.54125199		3.00000000	11.44666667	103.88886839	0.083228
4	-0.27018368	9.08679200	-2.45510290		4.00000000	8.58500000	78.01010932	0.104730
5	-0.26003858	9.07060430	-2.35870706		5.00000000	6.86800000	62.29691033	0.126129
6	-0.24985851	9.07872680	-2.26839715		6.00000000	5.72333333	51.96057972	0.147462
7	-0.24006175	9.08733650	-2.18152190		7.00000000	4.90571429	44.57987649	0.168841
8	-0.22990920	9.08379360	-2.08844772		8.00000000	4.29250000	38.99218403	0.190333
9	-0.22008713	9.09018040	-2.00063172		9.00000000	3.81555556	34.68408833	0.211714
10	-0.20994650	9.08190440	-1.90671404		10.00000000	3.43400000	31.18725971	0.233091
11	-0.20012218	9.08165550	-1.81744070		11.00000000	3.12181818	28.35127726	0.254451
12	-0.18998155	9.07538410	-1.72415554		12.00000000	2.86166667	25.97072417	0.275927
13	-0.18020487	9.07519720	-1.63539473		13.00000000	2.64153846	23.97248245	0.297316
14	-0.17004117	9.07796190	-1.54362726		14.00000000	2.45285714	22.26694369	0.318701
15	-0.16022356	9.07683370	-1.45432261		15.00000000	2.28933333	20.77989795	0.340053
16	-0.15007474	9.07550430	-1.36200395		16.00000000	2.14625000	19.47830110	0.361514
17	-0.13992964	9.08362960	-1.27106902		17.00000000	2.02000000	18.34893179	0.382883
18	-0.13013436	9.06952760	-1.18025717		18.00000000	1.90777778	17.30264321	0.404251
19	-0.11998852	9.07869150	-1.08933876		19.00000000	1.80736842	16.40854032	0.425734
20	-0.11014113	9.08195780	-1.00029709		20.00000000	1.71700000	15.59372154	0.447117
21	-0.09997594	9.08453080	-0.90823454		21.00000000	1.63523810	14.85537084	0.468494
22	-0.09016652	9.06529710	-0.81738627		22.00000000	1.56090909	14.15010466	0.489866
23	-0.08002589	9.09451580	-0.72779671		23.00000000	1.49304348	13.57850750	0.511337
24	-0.07017254	9.07613950	-0.63689577		24.00000000	1.43083333	12.98644293	0.532728
25	-0.06002373	9.09644510	-0.54600256		25.00000000	1.37360000	12.49487699	0.554081
26	-0.04988162	9.06478980	-0.45216635		26.00000000	1.32076923	11.97249545	0.575453
27	-0.04007293	9.09393500	-0.36442061		27.00000000	1.27185185	11.56613807	0.596939
28	-0.02988988	9.07003970	-0.27110238		28.00000000	1.22642857	11.12375583	0.618320
29	-0.02006110	9.07000640	-0.18195427		29.00000000	1.18413793	10.74013861	0.639657
30	-0.00993759	9.08899210	-0.09032265		30.00000000	1.14466667	10.40386629	0.661049
31	-0.00069529	9.07289700	-0.00630828		31.00000000	1.10774194	10.05042848	0.682640
32	0.00947416	9.07695580	0.08599652		32.00000000	1.07312500	9.74070819	0.704023
33	0.01926991	9.07602790	0.17489426		33.00000000	1.04060606	9.44456964	0.725382
34	0.02941397	9.08220480	0.26714372		34.00000000	1.01000000	9.17302685	0.746760
35	0.03925885	9.07495690	0.35627233		35.00000000	0.98114286	8.90382914	0.768232
36	0.04941332	9.07932380	0.44863956		36.00000000	0.95388889	8.66066609	0.789609
37	0.05924629	9.07129000	0.53744028		37.00000000	0.92810811	8.41913780	0.810957
38	0.06934346	9.09112640	0.63041019		38.00000000	0.90368421	8.21550738	0.832342
39	0.07949645	9.08375360	0.72212617		39.00000000	0.88051282	7.99836150	0.853827
40	0.08931900	9.07966800	0.81098685		40.00000000	0.85850000	7.79489498	0.875195
41	0.09947720	9.07281020	0.90253777		41.00000000	0.83756098	7.59903176	0.896559
42	0.10926551	9.07485290	0.99156843		42.00000000	0.81761905	7.41977259	0.917934
43	0.11944529	9.08667370	1.08536038		43.00000000	0.79860465	7.25665988	0.939409
44	0.12924403	9.06730270	1.17189474		44.00000000	0.78045455	7.07661761	0.960803
45	0.13940223	9.08471110	1.26642899		45.00000000	0.76311111	6.93264398	0.982187
46	0.14920022	9.06910040	1.35311177		46.00000000	0.74652174	6.77028060	1.003527
47	0.15939116	9.08683870	1.44836176		47.00000000	0.73063830	6.63919236	1.024997
48	0.16949280	9.07432270	1.53803236		48.00000000	0.71541667	6.49192170	1.046374
49	0.17933023	9.07187750	1.62686188		49.00000000	0.70081633	6.35771986	1.067782
50	0.18947577	9.08078290	1.72058833		50.00000000	0.68680000	6.23668170	1.089266
51	0.19926929	9.08320240	1.81000329		51.00000000	0.67333333	6.11602295	1.110717
52	0.20940964	9.07909010	1.90124899		52.00000000	0.66038462	5.99569142	1.132088
53	0.21923219	9.08235170	1.99114385		53.00000000	0.64792453	5.88467844	1.153468
54	0.22938666	9.07662200	2.08205600		54.00000000	0.63592593	5.77205925	1.174801
55	0.23919804	9.08479790	2.17306585		55.00000000	0.62436364	5.67221745	1.196285
56	0.24935327	9.06387520	2.26010692		56.00000000	0.61321429	5.55809776	1.217667
57	0.25950402	9.08015160	2.35633584		57.00000000	0.60245614	5.47039309	1.239035
58	0.26933476	9.07520680	2.44426865		58.00000000	0.59206897	5.37314830	1.260408
59	0.27950040	9.06830410	2.53459462		59.00000000	0.58203390	5.27806039	1.281876
60	0.28930807	9.08399680	2.62807358		60.00000000	0.57233333	5.19907417	1.303250
61	0.29942980	9.06677910	2.71486385		61.00000000	0.56295082	5.10415073	1.324642
62	0.30924267	9.08435440	2.80927001		62.00000000	0.55387097	5.03156016	1.345995
63	0.31942320	9.06498150	2.89556540		63.00000000	0.54507937	4.94113436	1.367463
64	0.32923084	9.09237000	2.99348861		64.00000000	0.53656250	4.87862478	1.388840
65	0.33938682	9.06922720	3.07797618		65.00000000	0.52830769	4.79134249	1.410226
66	0.34919822	9.07711600	3.16971275		66.00000000	0.52030303	4.72285096	1.431714
67	0.35934451	9.07656860	3.26161510		67.00000000	0.51253731	4.65208009	1.453135
68	0.36949599	9.07031350	3.35144447		68.00000000	0.50500000	4.58050832	1.474479
69	0.37935501	9.07446960	3.44244551		69.00000000	0.49768116	4.51619255	1.495866
70	0.38947973	9.07497310	3.53451807		70.00000000	0.49057143	4.45192252	1.517333
71	0.39929184	9.05436610	3.61533450		71.00000000	0.48366197	4.37925256	1.538707
72	0.40945452	9.09280400	3.72308970		72.00000000	0.47694444	4.33676235	1.560068
73	0.41927931	9.07005980	3.80288841		73.00000000	0.47041096	4.26665553	1.581439
74	0.42942783	9.06324100	3.89200792		74.00000000	0.46405405	4.20583373	1.602913
75	0.43923771	9.08682540	3.99127638		75.00000000	0.45786667	4.16055446	1.624294
76	0.44935572	9.06928920	4.07533698		76.00000000	0.45184211	4.09788673	1.645634
77	0.45951691	9.07157900	4.16854395		77.00000000	0.44597403	4.04568861	1.667035
78	0.46940270	9.06234840	4.25389081		78.00000000	0.44025641	3.98975698	1.688502
79	0.47951627	9.06380840	4.34624360		79.00000000	0.43468354	3.93988836	1.709876
80	0.48931870	9.04442790	4.42560770		80.00000000	0.42925000	3.88232068	1.731229
81	0.49945757	9.04718970	4.51868738		81.00000000	0.42395062	3.83556166	1.752602
82	0.50930542	9.02071950	4.59430133		82.00000000	0.41878049	3.77770131	1.774079
83	0.51942343	9.00526520	4.67754574		83.00000000	0.41373494	3.72579286	1.795460
84	0.52920729	8.97802730	4.75123750		84.00000000	0.40880952	3.67030307	1.816815
85	0.53933573	8.91986660	4.81080276		85.00000000	0.40400000	3.60362611	1.838194
86	0.54950505	8.86421590	4.87093140		86.00000000	0.39930233	3.53950202	1.859659
87	0.55931795	8.77443410	4.90769849		87.00000000	0.39471264	3.46338008	1.881039
88	0.56945604	8.62919430	4.91394681		88.00000000	0.39022727	3.36734696	1.902394
89	0.57926816	8.46642400	4.90432985		89.00000000	0.38584270	3.26670787	1.923759
90	0.58940256	8.19116500	4.82789362		90.00000000	0.38155556	3.12538451	1.945232
91	0.59920353	7.83896730	4.69713688		91.00000000	0.37736264	2.95813337	1.966619
92	0.60934532	7.37965060	4.49675556		92.00000000	0.37326087	2.75453480	1.988106
93	0.61911577	6.75981950	4.18511085		93.00000000	0.36924731	2.49604518	2.009473
94	0.62921369	5.90100620	3.71299389		94.00000000	0.36531915	2.15575056	2.030963
95	0.63933992	4.81785060	3.08024422		95.00000000	0.36147368	1.74152621	2.052331
96	0.64914310	3.49061420	2.26590812		96.00000000	0.35770833	1.24862179	2.073759
97	0.65922612	1.76557040	1.16391012		97.00000000	0.35402062	0.62504833	2.095268
98	0.66895491	-0.25726709	-0.17210008		98.00000000	0.35040816	-0.09014849	2.116643
99	0.67903274	-2.77936940	-1.88728282		99.00000000	0.34686869	-0.96407621	2.137989
100	0.68878084	-5.69506980	-3.92265496		100.00000000	0.34340000	-1.95568697	2.159371
101	0.69907153	-9.25874140	-6.47252252		101.00000000	0.34000000	-3.14797208	2.180846
