# Supplementary material for: Study on the Electrical Injection Regeneration of Industrialized B-Doped Czochralski Silicon PERC Solar Cells
Source: Hindawi journal article supplement (doi:10.1155/2019/5357370), 2019-06-20
Supplement: f1 [file 5357370.f1.zip › section3.1/IVRawData_1-0-9h.csv]

00:00 03/04/2018
Test Lot:	JK-PERC
Recipe:	Recipe_YJX-LID
Cell Name:	1-0-9h
Test Order:	2
Test Condition:	Light
1	-0.29982591	8.63392540	-2.58867454		1.00000000	34.34000000	296.48899824	0.000000
2	-0.29002708	8.63967130	-2.50573864		2.00000000	17.17000000	148.34315622	0.061724
3	-0.27993652	8.63446330	-2.41710161		3.00000000	11.44666667	98.83582324	0.083229
4	-0.27007148	8.62451840	-2.32923645		4.00000000	8.58500000	74.04149046	0.104667
5	-0.25993550	8.63193990	-2.24374761		5.00000000	6.86800000	59.28416323	0.126044
6	-0.24981292	8.63602640	-2.15739097		6.00000000	5.72333333	49.42685776	0.147419
7	-0.23995233	8.63210010	-2.07129253		7.00000000	4.90571429	42.34661678	0.168945
8	-0.22981486	8.64569380	-1.98690891		8.00000000	4.29250000	37.11164064	0.190342
9	-0.21998180	8.63812640	-1.90023059		9.00000000	3.81555556	32.95925118	0.211705
10	-0.20985104	8.64180280	-1.81349131		10.00000000	3.43400000	29.67595082	0.233075
11	-0.20001875	8.64067750	-1.72829751		11.00000000	3.12181818	26.97462412	0.254565
12	-0.18984257	8.63572600	-1.63942842		12.00000000	2.86166667	24.71256924	0.275939
13	-0.18008322	8.63568310	-1.55514162		13.00000000	2.64153846	22.81148905	0.297275
14	-0.16997030	8.63350680	-1.46743974		14.00000000	2.45285714	21.17675882	0.318661
15	-0.16015513	8.62844660	-1.38188999		15.00000000	2.28933333	19.75339042	0.340141
16	-0.14997746	8.63090990	-1.29444194		16.00000000	2.14625000	18.52409037	0.361521
17	-0.13979682	8.63186650	-1.20670749		17.00000000	2.02000000	17.43637033	0.382870
18	-0.12997048	8.63750550	-1.12262074		18.00000000	1.90777778	16.47844105	0.404243
19	-0.11985088	8.62112240	-1.03324911		19.00000000	1.80736842	15.58154438	0.425721
20	-0.11003123	8.65197750	-0.95198773		20.00000000	1.71700000	14.85544537	0.447091
21	-0.09983571	8.62627890	-0.86121067		21.00000000	1.63523810	14.10601988	0.468445
22	-0.09005700	8.64807890	-0.77882005		22.00000000	1.56090909	13.49886497	0.489825
23	-0.07989571	8.62276940	-0.68892230		23.00000000	1.49304348	12.87416962	0.511300
24	-0.07008574	8.64584450	-0.60595043		24.00000000	1.43083333	12.37076251	0.532677
25	-0.05991776	8.63214300	-0.51721866		25.00000000	1.37360000	11.85711162	0.554027
26	-0.04976987	8.64520170	-0.43027057		26.00000000	1.32076923	11.41831640	0.575395
27	-0.03991078	8.63056950	-0.34445272		27.00000000	1.27185185	10.97680580	0.596878
28	-0.02978447	8.62085060	-0.25676747		28.00000000	1.22642857	10.57285749	0.618269
29	-0.01998046	8.64348130	-0.17270069		29.00000000	1.18413793	10.23507406	0.639644
30	-0.00986457	8.62845710	-0.08511604		30.00000000	1.14466667	9.87670723	0.661023
31	-0.00067312	8.63771530	-0.00581422		31.00000000	1.10774194	9.56835946	0.682618
32	0.00946563	8.63004400	0.08168879		32.00000000	1.07312500	9.26111597	0.704002
33	0.01929616	8.63929750	0.16670527		33.00000000	1.04060606	8.99010534	0.725392
34	0.02938645	8.63590810	0.25377868		34.00000000	1.01000000	8.72226718	0.746742
35	0.03924378	8.62617400	0.33852364		35.00000000	0.98114286	8.46350900	0.768221
36	0.04940403	8.63265230	0.42648777		36.00000000	0.95388889	8.23459111	0.789607
37	0.05922488	8.63899040	0.51164318		37.00000000	0.92810811	8.01791704	0.810996
38	0.06937993	8.63252350	0.59892384		38.00000000	0.90368421	7.80107518	0.832478
39	0.07947914	8.63072490	0.68596262		39.00000000	0.88051282	7.59946392	0.853871
40	0.08928660	8.63670920	0.77114243		40.00000000	0.85850000	7.41461485	0.875213
41	0.09949747	8.63661380	0.85932120		41.00000000	0.83756098	7.23369068	0.896581
42	0.10926473	8.64915370	0.94504744		42.00000000	0.81761905	7.07171281	0.918075
43	0.11943466	8.61560540	1.02900190		43.00000000	0.79860465	6.88046255	0.939445
44	0.12925775	8.64403060	1.11730795		44.00000000	0.78045455	6.74627297	0.960854
45	0.13939343	8.63682940	1.20391727		45.00000000	0.76311111	6.59086048	0.982226
46	0.14922322	8.62508580	1.28706308		46.00000000	0.74652174	6.43881405	1.003695
47	0.15937826	8.63244720	1.37582441		47.00000000	0.73063830	6.30719653	1.025074
48	0.16952512	8.64608760	1.46572904		48.00000000	0.71541667	6.18555517	1.046421
49	0.17933184	8.62269120	1.54632308		49.00000000	0.70081633	6.04292277	1.067788
50	0.18948241	8.63199620	1.63561144		50.00000000	0.68680000	5.92845499	1.089265
51	0.19928317	8.62546160	1.71890933		51.00000000	0.67333333	5.80781081	1.110642
52	0.20941588	8.64751630	1.81092724		52.00000000	0.66038462	5.71068673	1.131980
53	0.21926056	8.63145260	1.89253713		53.00000000	0.64792453	5.59252985	1.153364
54	0.22937615	8.62705330	1.97884027		54.00000000	0.63592593	5.48616686	1.174850
55	0.23923199	8.62808320	2.06411351		55.00000000	0.62436364	5.38706140	1.196220
56	0.24932228	8.63193990	2.15213494		56.00000000	0.61321429	5.29322886	1.217583
57	0.25950038	8.62958340	2.23938017		57.00000000	0.60245614	5.19894551	1.238962
58	0.26930860	8.63110540	2.32443091		58.00000000	0.59206897	5.11020965	1.260431
59	0.27947032	8.62733360	2.41108368		59.00000000	0.58203390	5.02140061	1.281812
60	0.28928524	8.62550640	2.49523169		60.00000000	0.57233333	4.93666483	1.303181
61	0.29944175	8.63377380	2.58531234		61.00000000	0.56295082	4.86039004	1.324553
62	0.30928198	8.62738230	2.66829388		62.00000000	0.55387097	4.77845658	1.346038
63	0.31943926	8.62912080	2.75647996		63.00000000	0.54507937	4.70355569	1.367407
64	0.32923853	8.61939530	2.83783704		64.00000000	0.53656250	4.62484429	1.388794
65	0.33938760	8.63827420	2.93172315		65.00000000	0.52830769	4.56366671	1.410149
66	0.34920996	8.61697670	3.00913409		66.00000000	0.52030303	4.48343909	1.431624
67	0.35935235	8.62998390	3.10120499		67.00000000	0.51253731	4.42318876	1.453012
68	0.36951482	8.61420150	3.18307512		68.00000000	0.50500000	4.35017176	1.474398
69	0.37935057	8.62752720	3.27285736		69.00000000	0.49768116	4.29375774	1.495879
70	0.38946989	8.62498760	3.35917297		70.00000000	0.49057143	4.23117249	1.517300
71	0.39929447	8.62245750	3.44289960		71.00000000	0.48366197	4.17035480	1.538683
72	0.40944132	8.61130620	3.52582458		72.00000000	0.47694444	4.10711465	1.560115
73	0.41928077	8.61659340	3.61277192		73.00000000	0.47041096	4.05333996	1.581610
74	0.42940307	8.61299040	3.69844452		74.00000000	0.46405405	3.99689311	1.602984
75	0.43921277	8.61079880	3.78197279		75.00000000	0.45786667	3.94259774	1.624346
76	0.44935367	8.58241560	3.85653995		76.00000000	0.45184211	3.87789673	1.645720
77	0.45954591	8.59304430	3.94889836		77.00000000	0.44597403	3.83227456	1.667200
78	0.46939209	8.56083300	4.01838729		78.00000000	0.44025641	3.76896161	1.688580
79	0.47952777	8.56779190	4.10849414		79.00000000	0.43468354	3.72427815	1.709941
80	0.48932555	8.51899240	4.16856064		80.00000000	0.42925000	3.65677749	1.731313
81	0.49947390	8.48875330	4.23991072		81.00000000	0.42395062	3.59881220	1.752799
82	0.50928134	8.43615530	4.29637648		82.00000000	0.41878049	3.53289723	1.774166
83	0.51940364	8.36649700	4.34558900		83.00000000	0.41373494	3.46151213	1.795501
84	0.52922523	8.26632880	4.37474976		84.00000000	0.40880952	3.37935394	1.816888
85	0.53933638	8.12656210	4.38295058		85.00000000	0.40400000	3.28313109	1.838352
86	0.54948694	7.91154100	4.34728845		86.00000000	0.39930233	3.15909672	1.859729
87	0.55929667	7.63524910	4.27036940		87.00000000	0.39471264	3.01372936	1.881084
88	0.56940627	7.25761130	4.13252938		88.00000000	0.39022727	2.83211786	1.902458
89	0.57921523	6.73482610	3.90091385		89.00000000	0.38584270	2.59858346	1.923939
90	0.58931446	6.02743050	3.55205195		90.00000000	0.38155556	2.29979959	1.945306
91	0.59912860	5.13727090	3.07788592		91.00000000	0.37736264	1.93861410	1.966666
92	0.60924047	3.97651890	2.42265624		92.00000000	0.37326087	1.48427890	1.988132
93	0.61905092	2.59085820	1.60387315		93.00000000	0.36924731	0.95666743	2.009644
94	0.62909359	0.86317974	0.54302084		94.00000000	0.36531915	0.31533609	2.031021
95	0.63919801	-1.17780860	-0.75285291		95.00000000	0.36147368	-0.42574681	2.052410
96	0.64893031	-3.43964550	-2.23209022		96.00000000	0.35770833	-1.23038986	2.073754
97	0.65900719	-6.12460850	-4.03616104		97.00000000	0.35402062	-2.16823769	2.095214
98	0.66898507	-9.07699300	-6.07237280		98.00000000	0.35040816	-3.18065245	2.116606
99	0.67185354	-10.00054800	-6.71890358		99.00000000	0.34686869	-3.46887695	2.137986
100	0.67184907	-10.00052800	-6.71884544		100.00000000	0.34340000	-3.43418132	2.159494
101	0.67181933	-10.00034100	-6.71842239		101.00000000	0.34000000	-3.40011594	2.180889
00:01 03/04/2018
Test Lot:	JK-PERC
Recipe:	Recipe_YJX-LID
Cell Name:	1-0-9h
Test Order:	2
Test Condition:	Light
1	-0.29987675	8.63236140	-2.58864448		1.00000000	34.34000000	296.43529048	0.000000
2	-0.29004130	8.64736750	-2.50809371		2.00000000	17.17000000	148.47529998	0.061724
3	-0.27987760	8.61895280	-2.41225182		3.00000000	11.44666667	98.65827972	0.083241
4	-0.27010837	8.63344480	-2.33196570		4.00000000	8.58500000	74.11812361	0.104650
5	-0.25989556	8.64686010	-2.24728055		5.00000000	6.86800000	59.38663517	0.126015
6	-0.24978693	8.62220380	-2.15371382		6.00000000	5.72333333	49.34774642	0.147393
7	-0.23992319	8.63270380	-2.07118583		7.00000000	4.90571429	42.34957836	0.168878
8	-0.22978853	8.63110830	-1.98332969		8.00000000	4.29250000	37.04903238	0.190264
9	-0.21998730	8.62930970	-1.89833854		9.00000000	3.81555556	32.92561057	0.211608
10	-0.20980351	8.63173770	-1.81096887		10.00000000	3.43400000	29.64138726	0.232987
11	-0.20000601	8.64138130	-1.72832819		11.00000000	3.12181818	26.97682126	0.254468
12	-0.18988623	8.63630490	-1.63991538		12.00000000	2.86166667	24.71422586	0.275851
13	-0.18006343	8.62595650	-1.55321931		13.00000000	2.64153846	22.78579586	0.297203
14	-0.16994067	8.63541890	-1.46750887		14.00000000	2.45285714	21.18144893	0.318584
15	-0.16013499	8.63455100	-1.38269374		15.00000000	2.28933333	19.76736542	0.340066
16	-0.14996979	8.63648030	-1.29521114		16.00000000	2.14625000	18.53604584	0.361456
17	-0.13981204	8.63575080	-1.20738194		17.00000000	2.02000000	17.44421662	0.382803
18	-0.13003093	8.63912200	-1.12335307		18.00000000	1.90777778	16.48152497	0.404167
19	-0.11985010	8.64024640	-1.03553440		19.00000000	1.80736842	15.61610849	0.425641
20	-0.11005559	8.63072110	-0.94985910		20.00000000	1.71700000	14.81894813	0.447018
21	-0.09989709	8.63945390	-0.86305634		21.00000000	1.63523810	14.12756414	0.468358
22	-0.09005717	8.63192270	-0.77736655		22.00000000	1.56090909	13.47364661	0.489734
23	-0.07992175	8.63034530	-0.68975232		23.00000000	1.49304348	12.88548077	0.511212
24	-0.07009895	8.64521600	-0.60602057		24.00000000	1.43083333	12.36986323	0.532582
25	-0.05996577	8.62930770	-0.51746309		25.00000000	1.37360000	11.85321706	0.553948
26	-0.04980132	8.63700770	-0.43013442		26.00000000	1.32076923	11.40749402	0.575312
27	-0.03998001	8.62918570	-0.34499492		27.00000000	1.27185185	10.97504581	0.596782
28	-0.02985725	8.62417980	-0.25749428		28.00000000	1.22642857	10.57694051	0.618167
29	-0.02000691	8.63611510	-0.17278194		29.00000000	1.18413793	10.22635147	0.639519
30	-0.00986181	8.63866620	-0.08519291		30.00000000	1.14466667	9.88839324	0.660884
31	-0.00068508	8.62736030	-0.00591044		31.00000000	1.10774194	9.55688880	0.682479
32	0.00945385	8.62898920	0.08157718		32.00000000	1.07312500	9.25998404	0.703847
33	0.01932103	8.62708470	0.16668418		33.00000000	1.04060606	8.97739662	0.725243
34	0.02943234	8.63922690	0.25427267		34.00000000	1.01000000	8.72561917	0.746596
35	0.03925635	8.62635040	0.33863906		35.00000000	0.98114286	8.46368208	0.768070
36	0.04937808	8.63118650	0.42619143		36.00000000	0.95388889	8.23319290	0.789463
37	0.05923410	8.62176990	0.51070276		37.00000000	0.92810811	8.00193455	0.810841
38	0.06941016	8.64458560	0.60002207		38.00000000	0.90368421	7.81197551	0.832317
39	0.07951999	8.62568000	0.68591396		39.00000000	0.88051282	7.59502183	0.853702
40	0.08935442	8.63459300	0.77153903		40.00000000	0.85850000	7.41279809	0.875045
41	0.09947763	8.63099480	0.85859094		41.00000000	0.83756098	7.22898443	0.896417
42	0.10932695	8.62964150	0.94345238		42.00000000	0.81761905	7.05575926	0.917894
43	0.11949706	8.63206960	1.03150694		43.00000000	0.79860465	6.89361093	0.939274
44	0.12929055	8.63087460	1.11589052		44.00000000	0.78045455	6.73600531	0.960680
45	0.13944727	8.64165500	1.20505520		45.00000000	0.76311111	6.59454295	0.982052
46	0.14926235	8.63285060	1.28855957		46.00000000	0.74652174	6.44461064	1.003550
47	0.15940864	8.63320450	1.37620739		47.00000000	0.73063830	6.30774984	1.024942
48	0.16950729	8.62658410	1.46226889		48.00000000	0.71541667	6.17160204	1.046302
49	0.17935736	8.63480470	1.54871578		49.00000000	0.70081633	6.05141211	1.067662
50	0.18948355	8.62316130	1.63394722		50.00000000	0.68680000	5.92238718	1.089134
51	0.19928598	8.62993530	1.71982511		51.00000000	0.67333333	5.81082310	1.110512
52	0.20941664	8.63496690	1.80830575		52.00000000	0.66038462	5.70239930	1.131855
53	0.21925181	8.62130930	1.89023767		53.00000000	0.64792453	5.58595776	1.153234
54	0.22938323	8.64611240	1.98327319		54.00000000	0.63592593	5.49828703	1.174713
55	0.23922212	8.62413310	2.06308340		55.00000000	0.62436364	5.38459510	1.196085
56	0.24937363	8.62722680	2.15140286		56.00000000	0.61321429	5.29033872	1.217443
57	0.25951841	8.63356780	2.24056979		57.00000000	0.60245614	5.20134593	1.238820
58	0.26930523	8.63507370	2.32547051		58.00000000	0.59206897	5.11255915	1.260297
59	0.27945226	8.61726570	2.40811437		59.00000000	0.58203390	5.01554075	1.281666
60	0.28931648	8.62924960	2.49658412		60.00000000	0.57233333	4.93880719	1.303034
61	0.29945979	8.62998200	2.58433260		61.00000000	0.56295082	4.85825544	1.324398
62	0.30929348	8.63243680	2.66995642		62.00000000	0.55387097	4.78125612	1.345873
63	0.31944570	8.62165450	2.75415046		63.00000000	0.54507937	4.69948596	1.367250
64	0.32925260	8.63654710	2.84360559		64.00000000	0.53656250	4.63404730	1.388632
65	0.33940113	8.61394500	2.92358267		65.00000000	0.52830769	4.55081340	1.409974
66	0.34922290	8.63355450	3.01503494		66.00000000	0.52030303	4.49206457	1.431441
67	0.35936844	8.62886710	3.10094251		67.00000000	0.51253731	4.42261636	1.452823
68	0.36954451	8.61928180	3.18520827		68.00000000	0.50500000	4.35273731	1.474202
69	0.37935364	8.61518290	3.26820099		69.00000000	0.49768116	4.28761421	1.495690
70	0.38951036	8.63608650	3.36384516		70.00000000	0.49057143	4.23661729	1.517062
71	0.39931428	8.60442070	3.43586806		71.00000000	0.48366197	4.16163108	1.538415
72	0.40949777	8.61277480	3.52691207		72.00000000	0.47694444	4.10781509	1.559829
73	0.41928533	8.61055180	3.61027805		73.00000000	0.47041096	4.05049793	1.581308
74	0.42943087	8.61548810	3.69975655		74.00000000	0.46405405	3.99805218	1.602685
75	0.43922138	8.59476180	3.77500314		75.00000000	0.45786667	3.93525494	1.624033
76	0.44940937	8.59201530	3.86133218		76.00000000	0.45184211	3.88223428	1.645415
77	0.45953628	8.58714200	3.94610329		77.00000000	0.44597403	3.82964229	1.666893
78	0.46938264	8.57197280	4.02353522		78.00000000	0.44025641	3.77386597	1.688271
79	0.47953713	8.55341430	4.10167975		79.00000000	0.43468354	3.71802844	1.709620
80	0.48936263	8.52838420	4.17347252		80.00000000	0.42925000	3.66080892	1.730991
81	0.49948436	8.48542880	4.23833897		81.00000000	0.42395062	3.59740278	1.752478
82	0.50930166	8.43966870	4.29833728		82.00000000	0.41878049	3.53436858	1.773850
83	0.51945388	8.37443260	4.35013151		83.00000000	0.41373494	3.46479537	1.795202
84	0.52921689	8.26238250	4.37259237		84.00000000	0.40880952	3.37774066	1.816581
85	0.53933269	8.12386890	4.38146807		85.00000000	0.40400000	3.28204304	1.838063
86	0.54945886	7.91727780	4.35021843		86.00000000	0.39930233	3.16138744	1.859434
87	0.55930221	7.65558820	4.28178740		87.00000000	0.39471264	3.02175746	1.880790
88	0.56942099	7.24982830	4.12820441		88.00000000	0.39022727	2.82908073	1.902151
89	0.57920927	6.74727340	3.90808330		89.00000000	0.38584270	2.60338616	1.923630
90	0.58931684	6.04229120	3.56082396		90.00000000	0.38155556	2.30546978	1.945004
91	0.59914607	5.15123940	3.08634484		91.00000000	0.37736264	1.94388529	1.966360
92	0.60925889	3.99965500	2.43682537		92.00000000	0.37326087	1.49291470	1.987888
93	0.61904788	2.59474490	1.60627133		93.00000000	0.36924731	0.95810258	2.009390
94	0.62908554	0.86284548	0.54280361		94.00000000	0.36531915	0.31521398	2.030776
95	0.63918340	-1.19775650	-0.76558607		95.00000000	0.36147368	-0.43295745	2.052175
96	0.64893001	-3.48921700	-2.26425762		96.00000000	0.35770833	-1.24812200	2.073538
97	0.65903389	-6.22211980	-4.10058782		97.00000000	0.35402062	-2.20275870	2.095019
98	0.66902536	-9.21444320	-6.16469618		98.00000000	0.35040816	-3.22881612	2.116412
99	0.67139077	-10.00039000	-6.71416954		99.00000000	0.34686869	-3.46882215	2.137801
100	0.67135501	-10.00042500	-6.71383543		100.00000000	0.34340000	-3.43414595	2.159281
101	0.67135650	-10.00029000	-6.71375969		101.00000000	0.34000000	-3.40009860	2.180667
00:01 03/04/2018
Test Lot:	JK-PERC
Recipe:	Recipe_YJX-LID
Cell Name:	1-0-9h
Test Order:	3
Test Condition:	Light
1	-0.29982084	8.62988190	-2.58741844		1.00000000	34.34000000	296.35014445	0.000000
2	-0.29001230	8.63019850	-2.50286372		2.00000000	17.17000000	148.18050825	0.061729
3	-0.27986211	8.62807750	-2.41467197		3.00000000	11.44666667	98.76272712	0.083116
4	-0.27003348	8.63588620	-2.33197840		4.00000000	8.58500000	74.13908303	0.104621
5	-0.25990638	8.63330940	-2.24385219		5.00000000	6.86800000	59.29356896	0.126006
6	-0.24972421	8.64294720	-2.15835316		6.00000000	5.72333333	49.46646781	0.147425
7	-0.23989929	8.61917780	-2.06773463		7.00000000	4.90571429	42.28322366	0.168802
8	-0.22980048	8.63654710	-1.98468267		8.00000000	4.29250000	37.07237843	0.190291
9	-0.21990113	8.63274000	-1.89834928		9.00000000	3.81555556	32.93869907	0.211677
10	-0.20981646	8.63417050	-1.81159109		10.00000000	3.43400000	29.64974150	0.233062
11	-0.19997294	8.63667200	-1.72710069		11.00000000	3.12181818	26.96211968	0.254554
12	-0.18983988	8.62370870	-1.63712382		12.00000000	2.86166667	24.67817973	0.275940
13	-0.18005368	8.63588620	-1.55492309		13.00000000	2.64153846	22.81202555	0.297292
14	-0.16986926	8.63633160	-1.46704726		14.00000000	2.45285714	21.18368765	0.318658
15	-0.16007487	8.63293360	-1.38191572		15.00000000	2.28933333	19.76366265	0.340170
16	-0.14994480	8.63477330	-1.29473936		16.00000000	2.14625000	18.53238220	0.361536
17	-0.13975070	8.63389210	-1.20659246		17.00000000	2.02000000	17.44046204	0.382894
18	-0.12995705	8.62516400	-1.12090087		18.00000000	1.90777778	16.45489621	0.404273
19	-0.11978752	8.63161090	-1.03395926		19.00000000	1.80736842	15.60050096	0.425755
20	-0.10997824	8.62949280	-0.94905643		20.00000000	1.71700000	14.81683914	0.447146
21	-0.09982584	8.62663750	-0.86116131		21.00000000	1.63523810	14.10660627	0.468496
22	-0.09004038	8.63399510	-0.77740818		22.00000000	1.56090909	13.47688144	0.489867
23	-0.07982991	8.62066460	-0.68818687		23.00000000	1.49304348	12.87102706	0.511355
24	-0.07003701	8.62994670	-0.60441564		24.00000000	1.43083333	12.34801540	0.532733
25	-0.05990693	8.62541390	-0.51672203		25.00000000	1.37360000	11.84786853	0.554079
26	-0.04973591	8.63161090	-0.42930103		26.00000000	1.32076923	11.40036609	0.575480
27	-0.03991026	8.63048930	-0.34444505		27.00000000	1.27185185	10.97670380	0.596956
28	-0.02977794	8.63127990	-0.25702177		28.00000000	1.22642857	10.58564828	0.618326
29	-0.01992624	8.62318800	-0.17182771		29.00000000	1.18413793	10.21104400	0.639689
30	-0.00982519	8.63840580	-0.08487397		30.00000000	1.14466667	9.88809517	0.661074
31	-0.00062029	8.62420080	-0.00534950		31.00000000	1.10774194	9.55338889	0.682670
32	0.00952596	8.62942410	0.08220351		32.00000000	1.07312500	9.26045074	0.704052
33	0.01932230	8.63555430	0.16685879		33.00000000	1.04060606	8.98621014	0.725410
34	0.02942455	8.61732860	0.25356105		34.00000000	1.01000000	8.70350189	0.746789
35	0.03928044	8.63446900	0.33916578		35.00000000	0.98114286	8.47164758	0.768263
36	0.04942215	8.62714670	0.42637210		36.00000000	0.95388889	8.22933938	0.789637
37	0.05924826	8.62988660	0.51130577		37.00000000	0.92810811	8.00946773	0.811027
38	0.06938475	8.63765340	0.59932146		38.00000000	0.90368421	7.80571099	0.832380
39	0.07957036	8.63395880	0.68700721		39.00000000	0.88051282	7.60231142	0.853853
40	0.08936894	8.63292690	0.77151552		40.00000000	0.85850000	7.41136774	0.875231
41	0.09947268	8.64214900	0.85965771		41.00000000	0.83756098	7.23832675	0.896607
42	0.10935090	8.61590190	0.94215663		42.00000000	0.81761905	7.04452551	0.918101
43	0.11949334	8.64115140	1.03256004		43.00000000	0.79860465	6.90086370	0.939479
44	0.12931575	8.63023190	1.11602491		44.00000000	0.78045455	6.73550371	0.960833
45	0.13942023	8.62587830	1.20262194		45.00000000	0.76311111	6.58250357	0.982216
46	0.14923890	8.63073640	1.28804161		46.00000000	0.74652174	6.44303235	1.003694
47	0.15943642	8.62943740	1.37584661		47.00000000	0.73063830	6.30499745	1.025070
48	0.16953048	8.62261390	1.46179587		48.00000000	0.71541667	6.16876169	1.046433
49	0.17937893	8.63846590	1.54955877		49.00000000	0.70081633	6.05397794	1.067804
50	0.18954520	8.63031200	1.63583421		50.00000000	0.68680000	5.92729828	1.089276
51	0.19932739	8.64482120	1.72314965		51.00000000	0.67333333	5.82084627	1.110670
52	0.20948622	8.62071990	1.80592203		52.00000000	0.66038462	5.69299080	1.132014
53	0.21930489	8.63213440	1.89306929		53.00000000	0.64792453	5.59297161	1.153397
54	0.22943766	8.63132190	1.98035030		54.00000000	0.63592593	5.48888137	1.174891
55	0.23928462	8.63239000	2.06559816		55.00000000	0.62436364	5.38975041	1.196258
56	0.24942409	8.62724300	2.15184223		56.00000000	0.61321429	5.29034865	1.217613
57	0.25955164	8.62943460	2.23978390		57.00000000	0.60245614	5.19885586	1.238992
58	0.26935172	8.62550740	2.32329525		58.00000000	0.59206897	5.10689524	1.260474
59	0.27952468	8.61985680	2.40946271		59.00000000	0.58203390	5.01704886	1.281863
60	0.28937238	8.62996670	2.49727400		60.00000000	0.57233333	4.93921761	1.303207
61	0.29949397	8.61941340	2.58146234		61.00000000	0.56295082	4.85230584	1.324573
62	0.30931190	8.63189600	2.66994815		62.00000000	0.55387097	4.78095659	1.346055
63	0.31947446	8.63770870	2.75952732		63.00000000	0.54507937	4.70823677	1.367416
64	0.32927227	8.61685850	2.83729256		64.00000000	0.53656250	4.62348314	1.388768
65	0.33945194	8.61969850	2.92597338		65.00000000	0.52830769	4.55385302	1.410146
66	0.34924829	8.62494560	3.01224750		66.00000000	0.52030303	4.48758533	1.431621
67	0.35938850	8.62262250	3.09887137		67.00000000	0.51253731	4.41941577	1.453007
68	0.36954135	8.61958030	3.18529134		68.00000000	0.50500000	4.35288805	1.474394
69	0.37939277	8.62971970	3.27405326		69.00000000	0.49768116	4.29484891	1.495736
70	0.38953224	8.60874080	3.35338209		70.00000000	0.49057143	4.22320227	1.517202
71	0.39934126	8.62811760	3.44556335		71.00000000	0.48366197	4.17309237	1.538579
72	0.40948966	8.60723780	3.52457488		72.00000000	0.47694444	4.10517425	1.559965
73	0.41931501	8.62469480	3.61646399		73.00000000	0.47041096	4.05715095	1.581447
74	0.42945299	8.60771270	3.69660796		74.00000000	0.46405405	3.99444397	1.602832
75	0.43928954	8.59759520	3.77683364		75.00000000	0.45786667	3.93655226	1.624169
76	0.44942230	8.59754660	3.86392917		76.00000000	0.45184211	3.88473356	1.645554
77	0.45954913	8.57581330	3.94100754		77.00000000	0.44597403	3.82458998	1.667041
78	0.46939981	8.57144170	4.02343311		78.00000000	0.44025641	3.77363215	1.688416
79	0.47954226	8.56601620	4.10776677		79.00000000	0.43468354	3.72350628	1.709778
80	0.48935795	8.50664420	4.16279397		80.00000000	0.42925000	3.65147702	1.731149
81	0.49950412	8.49824710	4.24490944		81.00000000	0.42395062	3.60283710	1.752613
82	0.50932205	8.44079780	4.29908444		82.00000000	0.41878049	3.53484142	1.774002
83	0.51943398	8.36827950	4.34676873		83.00000000	0.41373494	3.46224961	1.795349
84	0.52927053	8.26794150	4.37597778		84.00000000	0.40880952	3.38001323	1.816720
85	0.53938764	8.12741370	4.38382649		85.00000000	0.40400000	3.28347513	1.838203
86	0.54952860	7.92299840	4.35391422		86.00000000	0.39930233	3.16367169	1.859579
87	0.55933982	7.65064480	4.27931029		87.00000000	0.39471264	3.01980623	1.880939
88	0.56943536	7.25886730	4.13345571		88.00000000	0.39022727	2.83260799	1.902320
89	0.57924885	6.75068620	3.91032722		89.00000000	0.38584270	2.60470297	1.923810
90	0.58936673	6.03600880	3.55742277		90.00000000	0.38155556	2.30307269	1.945204
91	0.59915411	5.15664050	3.08962235		91.00000000	0.37736264	1.94592346	1.966569
92	0.60927647	3.99769880	2.43570381		92.00000000	0.37326087	1.49218453	1.988044
93	0.61907732	2.59328910	1.60544647		93.00000000	0.36924731	0.95756503	2.009557
94	0.62909544	0.85471445	0.53769696		94.00000000	0.36531915	0.31224356	2.030947
95	0.63924015	-1.20848210	-0.77251028		95.00000000	0.36147368	-0.43683448	2.052316
96	0.64897543	-3.50989940	-2.27783847		96.00000000	0.35770833	-1.25552026	2.073690
97	0.65906358	-6.26344200	-4.12800651		97.00000000	0.35402062	-2.21738761	2.095168
98	0.66904819	-9.26140880	-6.19632879		98.00000000	0.35040816	-3.24527325	2.116544
99	0.67126620	-10.00043500	-6.71295400		99.00000000	0.34686869	-3.46883776	2.137937
100	0.67122525	-10.00039300	-6.71251629		100.00000000	0.34340000	-3.43413496	2.159346
101	0.67122823	-10.00035300	-6.71251924		101.00000000	0.34000000	-3.40012002	2.180896
00:01 03/04/2018
Test Lot:	JK-PERC
Recipe:	Recipe_YJX-LID
Cell Name:	1-0-9h
Test Order:	4
Test Condition:	Light
1	-0.29976726	8.63338660	-2.58800665		1.00000000	34.34000000	296.47049584	0.000000
2	-0.28997496	8.63229370	-2.50314902		2.00000000	17.17000000	148.21648283	0.061796
3	-0.27983057	8.63279250	-2.41571925		3.00000000	11.44666667	98.81669815	0.083224
4	-0.27005315	8.62958720	-2.33044721		4.00000000	8.58500000	74.08500611	0.104748
5	-0.25988719	8.63651080	-2.24451852		5.00000000	6.86800000	59.31555617	0.126127
6	-0.24973240	8.62909130	-2.15496368		6.00000000	5.72333333	49.38716587	0.147468
7	-0.23988800	8.63203810	-2.07072236		7.00000000	4.90571429	42.34631262	0.168846
8	-0.22975330	8.62099080	-1.98070109		8.00000000	4.29250000	37.00560301	0.190330
9	-0.21992601	8.63086700	-1.89815214		9.00000000	3.81555556	32.93155253	0.211710
10	-0.20975709	8.62807370	-1.80979963		10.00000000	3.43400000	29.62880509	0.233060
11	-0.19995511	8.63896370	-1.72740494		11.00000000	3.12181818	26.96927395	0.254436
12	-0.18980105	8.62542340	-1.63711442		12.00000000	2.86166667	24.68308663	0.275904
13	-0.18003704	8.64277360	-1.55601938		13.00000000	2.64153846	22.83021888	0.297285
14	-0.16987555	8.61360170	-1.46324033		14.00000000	2.45285714	21.12793446	0.318659
15	-0.16008770	8.63854500	-1.38292480		15.00000000	2.28933333	19.77650902	0.340016
16	-0.14994481	8.63258270	-1.29441097		16.00000000	2.14625000	18.52768062	0.361494
17	-0.13979152	8.63129430	-1.20658175		17.00000000	2.02000000	17.43521449	0.382862
18	-0.12994190	8.63259220	-1.12173543		18.00000000	1.90777778	16.46906756	0.404255
19	-0.11980572	8.62914660	-1.03382112		19.00000000	1.80736842	15.59604707	0.425675
20	-0.11001638	8.63918400	-0.95045175		20.00000000	1.71700000	14.83347893	0.447138
21	-0.09983703	8.62107280	-0.86070228		21.00000000	1.63523810	14.09750666	0.468530
22	-0.09001868	8.64029880	-0.77778825		22.00000000	1.56090909	13.48672095	0.489901
23	-0.07989068	8.63134100	-0.68956367		23.00000000	1.49304348	12.88696739	0.511269
24	-0.07005222	8.63286590	-0.60475143		24.00000000	1.43083333	12.35219229	0.532755
25	-0.05993092	8.62748910	-0.51705339		25.00000000	1.37360000	11.85071903	0.554126
26	-0.04977241	8.63712790	-0.42989069		26.00000000	1.32076923	11.40765277	0.575498
27	-0.03994140	8.62070560	-0.34432305		27.00000000	1.27185185	10.96426038	0.596865
28	-0.02976577	8.64244370	-0.25724896		28.00000000	1.22642857	10.59933988	0.618339
29	-0.01996006	8.62070560	-0.17206983		29.00000000	1.18413793	10.20810449	0.639716
30	-0.00981569	8.63215160	-0.08473053		30.00000000	1.14466667	9.88093620	0.661099
31	-0.00061810	8.63298320	-0.00533603		31.00000000	1.10774194	9.56311752	0.682571
32	0.00952234	8.62765310	0.08215546		32.00000000	1.07312500	9.25855023	0.704044
33	0.01936350	8.62986090	0.16710427		33.00000000	1.04060606	8.98028555	0.725427
34	0.02945101	8.63708500	0.25437087		34.00000000	1.01000000	8.72345585	0.746811
35	0.03929365	8.62442210	0.33888503		35.00000000	0.98114286	8.46179014	0.768300
36	0.04945410	8.63447670	0.42701031		36.00000000	0.95388889	8.23633139	0.789678
37	0.05928633	8.62649150	0.51143299		37.00000000	0.92810811	8.00631671	0.811039
38	0.06944902	8.63210680	0.59949131		38.00000000	0.90368421	7.80069862	0.832414
39	0.07958268	8.62768940	0.68661461		39.00000000	0.88051282	7.59679113	0.853892
40	0.08941788	8.63023950	0.77169768		40.00000000	0.85850000	7.40906061	0.875280
41	0.09956121	8.63321500	0.85953331		41.00000000	0.83756098	7.23084398	0.896630
42	0.10936515	8.62081910	0.94281717		42.00000000	0.81761905	7.04854590	0.917998
43	0.11952709	8.63787080	1.03245956		43.00000000	0.79860465	6.89824380	0.939480
44	0.12933996	8.61844440	1.11470925		44.00000000	0.78045455	6.72630411	0.960855
45	0.13949744	8.63387780	1.20440385		45.00000000	0.76311111	6.58860808	0.982205
46	0.14927310	8.61552720	1.28606645		46.00000000	0.74652174	6.43167835	1.003589
47	0.15942164	8.64339640	1.37794443		47.00000000	0.73063830	6.31519643	1.025068
48	0.16957539	8.62437730	1.46248214		48.00000000	0.71541667	6.17002326	1.046453
49	0.17941953	8.62326530	1.54718221		49.00000000	0.70081633	6.04332511	1.067820
50	0.18952416	8.63241390	1.63605099		50.00000000	0.68680000	5.92874187	1.089198
51	0.19931470	8.62423320	1.71893645		51.00000000	0.67333333	5.80698369	1.110673
52	0.20947218	8.63520240	1.80883467		52.00000000	0.66038462	5.70255482	1.132036
53	0.21927984	8.62254430	1.89075013		53.00000000	0.64792453	5.58675795	1.153380
54	0.22944476	8.63612170	1.98151287		54.00000000	0.63592593	5.49193369	1.174754
55	0.23926134	8.62624260	2.06392636		55.00000000	0.62436364	5.38591220	1.196233
56	0.24941213	8.64101120	2.15517301		56.00000000	0.61321429	5.29879151	1.217600
57	0.25957036	8.60810280	2.23440834		57.00000000	0.60245614	5.18600439	1.238978
58	0.26936164	8.63705160	2.32649038		58.00000000	0.59206897	5.11373021	1.260339
59	0.27954665	8.62758450	2.41181234		59.00000000	0.58203390	5.02154664	1.281804
60	0.28932455	8.62584020	2.49566733		60.00000000	0.57233333	4.93685587	1.303196
61	0.29948053	8.61144350	2.57895966		61.00000000	0.56295082	4.84781918	1.324584
62	0.30931425	8.63487050	2.67088849		62.00000000	0.55387097	4.78260408	1.345934
63	0.31947395	8.60726170	2.74979589		63.00000000	0.54507937	4.69164074	1.367396
64	0.32930171	8.62950520	2.84171082		64.00000000	0.53656250	4.63026888	1.388772
65	0.33944356	8.62827010	2.92881072		65.00000000	0.52830769	4.55838147	1.410160
66	0.34925643	8.61853980	3.01008044		66.00000000	0.52030303	4.48425237	1.431632
67	0.35941240	8.62175850	3.09876691		67.00000000	0.51253731	4.41897294	1.453009
68	0.36956394	8.60716150	3.18089652		68.00000000	0.50500000	4.34661656	1.474363
69	0.37939021	8.61149220	3.26711583		69.00000000	0.49768116	4.28577742	1.495747
70	0.38954097	8.62680820	3.36049523		70.00000000	0.49057143	4.23206562	1.517235
71	0.39936799	8.60031600	3.43469091		71.00000000	0.48366197	4.15964579	1.538624
72	0.40952918	8.61225130	3.52696821		72.00000000	0.47694444	4.10756541	1.559984
73	0.41934726	8.61797520	3.61392429		73.00000000	0.47041096	4.05398998	1.581364
74	0.42948541	8.60490040	3.69567918		74.00000000	0.46405405	3.99313892	1.602842
75	0.43931314	8.60034280	3.77824360		75.00000000	0.45786667	3.93781029	1.624219
76	0.44946766	8.60023120	3.86552579		76.00000000	0.45184211	3.88594657	1.645561
77	0.45958868	8.57217690	3.93967547		77.00000000	0.44597403	3.82296824	1.666936
78	0.46944469	8.56795500	4.02218098		78.00000000	0.44025641	3.77209711	1.688424
79	0.47959846	8.55796240	4.10438559		79.00000000	0.43468354	3.72000543	1.709790
80	0.48941132	8.52443790	4.17195640		80.00000000	0.42925000	3.65911497	1.731144
81	0.49952489	8.49545380	4.24369062		81.00000000	0.42395062	3.60165288	1.752529
82	0.50932062	8.43655590	4.29691188		82.00000000	0.41878049	3.53306500	1.773993
83	0.51945728	8.37884710	4.35245312		83.00000000	0.41373494	3.46662180	1.795381
84	0.52923590	8.26211170	4.37260612		84.00000000	0.40880952	3.37762995	1.816718
85	0.53939265	8.13304140	4.38690275		85.00000000	0.40400000	3.28574873	1.838091
86	0.54953820	7.92400170	4.35454163		86.00000000	0.39930233	3.16407231	1.859568
87	0.55933547	7.64599510	4.27667626		87.00000000	0.39471264	3.01797094	1.880939
88	0.56946313	7.26323270	4.13614323		88.00000000	0.39022727	2.83431149	1.902309
89	0.57926559	6.75191350	3.91115116		89.00000000	0.38584270	2.60517651	1.923671
90	0.58937097	6.04164790	3.56077188		90.00000000	0.38155556	2.30522432	1.945153
91	0.59917790	5.16196300	3.09293415		91.00000000	0.37736264	1.94793197	1.966532
92	0.60927808	3.99925490	2.43665835		92.00000000	0.37326087	1.49276536	1.988031
93	0.61909616	2.59536100	1.60677803		93.00000000	0.36924731	0.95833007	2.009429
94	0.62913305	0.84882110	0.53402141		94.00000000	0.36531915	0.31009060	2.030933
95	0.63924140	-1.22613800	-0.78379817		95.00000000	0.36147368	-0.44321662	2.052318
96	0.64898056	-3.53812930	-2.29617713		96.00000000	0.35770833	-1.26561834	2.073704
97	0.65907329	-6.28834150	-4.14447792		97.00000000	0.35402062	-2.22620255	2.095182
98	0.66906852	-9.32946110	-6.24204873		98.00000000	0.35040816	-3.26911933	2.116560
99	0.67110121	-10.00027800	-6.71119867		99.00000000	0.34686869	-3.46878330	2.137913
100	0.67108929	-10.00020500	-6.71103047		100.00000000	0.34340000	-3.43407040	2.159288
101	0.67105281	-10.00019800	-6.71066097		101.00000000	0.34000000	-3.40006732	2.180769
