# Supplementary material for: Study on the Electrical Injection Regeneration of Industrialized B-Doped Czochralski Silicon PERC Solar Cells
Source: Hindawi journal article supplement (doi:10.1155/2019/5357370), 2019-06-20
Supplement: f1 [file 5357370.f1.zip › section3.1/IVRawData_1-0-10h.csv]

00:57 03/04/2018
Test Lot:	JK-PERC
Recipe:	Recipe_YJX-LID
Cell Name:	1-0-10h
Test Order:	2
Test Condition:	Light
1	-0.29979476	8.62211610	-2.58486523		1.00000000	34.34000000	296.08346687	0.000000
2	-0.28999946	8.62723450	-2.50189335		2.00000000	17.17000000	148.12961637	0.061761
3	-0.27985874	8.61449150	-2.41084074		3.00000000	11.44666667	98.60721270	0.083292
4	-0.27003142	8.61461830	-2.32621761		4.00000000	8.58500000	73.95649811	0.104691
5	-0.25987658	8.62180900	-2.24060624		5.00000000	6.86800000	59.21458421	0.126036
6	-0.24974480	8.62082770	-2.15300689		6.00000000	5.72333333	49.33987054	0.147402
7	-0.23996510	8.61422440	-2.06711322		7.00000000	4.90571429	42.25892370	0.168907
8	-0.22976039	8.62191390	-1.98097430		8.00000000	4.29250000	37.00956542	0.190282
9	-0.21994422	8.61586000	-1.89500861		9.00000000	3.81555556	32.87429249	0.211670
10	-0.20980352	8.62337300	-1.80921401		10.00000000	3.43400000	29.61266288	0.233045
11	-0.19998810	8.61304760	-1.72250702		11.00000000	3.12181818	26.88836860	0.254526
12	-0.18985334	8.62478920	-1.63744504		12.00000000	2.86166667	24.68127176	0.275917
13	-0.18005131	8.60122300	-1.54866147		13.00000000	2.64153846	22.72046137	0.297268
14	-0.16987340	8.64295580	-1.46820829		14.00000000	2.45285714	21.19993587	0.318639
15	-0.16009073	8.62262150	-1.38040177		15.00000000	2.28933333	19.74005482	0.340119
16	-0.14992025	8.60629080	-1.29025727		16.00000000	2.14625000	18.47125163	0.361483
17	-0.13977806	8.62246130	-1.20523091		17.00000000	2.02000000	17.41737183	0.382830
18	-0.12997603	8.61514570	-1.11976244		18.00000000	1.90777778	16.43578352	0.404210
19	-0.11981970	8.62711910	-1.03369882		19.00000000	1.80736842	15.59238263	0.425682
20	-0.11002363	8.61136050	-0.94745314		20.00000000	1.71700000	14.78570598	0.447043
21	-0.09984497	8.62344260	-0.86100737		21.00000000	1.63523810	14.10138185	0.468394
22	-0.09003177	8.61788940	-0.77588386		22.00000000	1.56090909	13.45174191	0.489774
23	-0.07986055	8.60774800	-0.68741952		23.00000000	1.49304348	12.85174201	0.511250
24	-0.07003918	8.61771580	-0.60357771		24.00000000	1.43083333	12.33051502	0.532646
25	-0.05988954	8.62214950	-0.51637660		25.00000000	1.37360000	11.84338455	0.554025
26	-0.04974512	8.61634730	-0.42862126		26.00000000	1.32076923	11.38020640	0.575376
27	-0.03992895	8.61702440	-0.34406874		27.00000000	1.27185185	10.95957844	0.596850
28	-0.02977485	8.61457820	-0.25649781		28.00000000	1.22642857	10.56516484	0.618218
29	-0.01994826	8.61611840	-0.17187658		29.00000000	1.18413793	10.20267262	0.639622
30	-0.00983510	8.61078170	-0.08468791		30.00000000	1.14466667	9.85647479	0.661059
31	-0.00063746	8.63271620	-0.00550305		31.00000000	1.10774194	9.56282175	0.682627
32	0.00948144	8.61139580	0.08164844		32.00000000	1.07312500	9.24110412	0.704024
33	0.01934646	8.61992170	0.16676496		33.00000000	1.04060606	8.96994276	0.725407
34	0.02947422	8.62168880	0.25411752		34.00000000	1.01000000	8.70790569	0.746749
35	0.03930276	8.60848520	0.33833722		35.00000000	0.98114286	8.44615376	0.768225
36	0.04942531	8.61167140	0.42563451		36.00000000	0.95388889	8.21457766	0.789606
37	0.05927023	8.61459830	0.51058921		37.00000000	0.92810811	7.99527853	0.810965
38	0.06938310	8.61538600	0.59776219		38.00000000	0.90368421	7.78558830	0.832337
39	0.07953616	8.62201790	0.68576221		39.00000000	0.88051282	7.59179730	0.853820
40	0.08932600	8.61764050	0.76977937		40.00000000	0.85850000	7.39824437	0.875215
41	0.09948502	8.62111470	0.85767174		41.00000000	0.83756098	7.22070924	0.896602
42	0.10930315	8.61742690	0.94191191		42.00000000	0.81761905	7.04577237	0.917948
43	0.11948970	8.61149120	1.02898450		43.00000000	0.79860465	6.87717693	0.939418
44	0.12929220	8.61987020	1.11448198		44.00000000	0.78045455	6.72741688	0.960797
45	0.13943930	8.61805250	1.20169521		45.00000000	0.76311111	6.57653162	0.982178
46	0.14926338	8.60863210	1.28495352		46.00000000	0.74652174	6.42653101	1.003674
47	0.15943059	8.62497330	1.37508458		47.00000000	0.73063830	6.30173581	1.025051
48	0.16954048	8.61086850	1.45989078		48.00000000	0.71541667	6.16035884	1.046403
49	0.17936009	8.62176900	1.54640126		49.00000000	0.70081633	6.04227648	1.067796
50	0.18949902	8.59855650	1.62941803		50.00000000	0.68680000	5.90548860	1.089274
51	0.19928811	8.62619110	1.71909732		51.00000000	0.67333333	5.80830201	1.110658
52	0.20945756	8.61085990	1.80360970		52.00000000	0.66038462	5.68647940	1.132008
53	0.21926154	8.60910610	1.88764586		53.00000000	0.64792453	5.57805101	1.153379
54	0.22941981	8.62680720	1.97916047		54.00000000	0.63592593	5.48601036	1.174859
55	0.23924762	8.59479140	2.05628339		55.00000000	0.62436364	5.36627521	1.196232
56	0.24939770	8.62123870	2.15011710		56.00000000	0.61321429	5.28666673	1.217577
57	0.25956938	8.60862540	2.23453556		57.00000000	0.60245614	5.18631923	1.238955
58	0.26938304	8.61651230	2.32114228		58.00000000	0.59206897	5.10156952	1.260430
59	0.27951527	8.60404300	2.40496140		59.00000000	0.58203390	5.00784469	1.281816
60	0.28934157	8.60479260	2.48972420		60.00000000	0.57233333	4.92480963	1.303180
61	0.29950282	8.62536330	2.58332063		61.00000000	0.56295082	4.85565534	1.324557
62	0.30931276	8.60167500	2.66060783		62.00000000	0.55387097	4.76421806	1.346024
63	0.31946880	8.62399860	2.75509848		63.00000000	0.54507937	4.70076368	1.367409
64	0.32927799	8.61245250	2.83589105		64.00000000	0.53656250	4.62111904	1.388757
65	0.33941394	8.60573010	2.92090476		65.00000000	0.52830769	4.54647341	1.410125
66	0.34925884	8.60914610	3.00682038		66.00000000	0.52030303	4.47936480	1.431604
67	0.35939926	8.60687160	3.09330328		67.00000000	0.51253731	4.41134285	1.452973
68	0.36957243	8.60459710	3.18002186		68.00000000	0.50500000	4.34532154	1.474338
69	0.37937343	8.61092660	3.26675676		69.00000000	0.49768116	4.28549593	1.495703
70	0.38954288	8.60619450	3.35248179		70.00000000	0.49057143	4.22195313	1.517169
71	0.39933643	8.61057660	3.43851692		71.00000000	0.48366197	4.16460846	1.538562
72	0.40949097	8.59841440	3.52097305		72.00000000	0.47694444	4.10096598	1.559945
73	0.41929793	8.59743500	3.60488670		73.00000000	0.47041096	4.04432764	1.581284
74	0.42943835	8.58918290	3.68852453		74.00000000	0.46405405	3.98584515	1.602753
75	0.43926018	8.58894250	3.77278043		75.00000000	0.45786667	3.93259047	1.624134
76	0.44942665	8.56867310	3.85099005		76.00000000	0.45184211	3.87168729	1.645511
77	0.45957005	8.56650350	3.93690844		77.00000000	0.44597403	3.82043805	1.667007
78	0.46946260	8.55960460	4.01841423		78.00000000	0.44025641	3.76842079	1.688386
79	0.47956654	8.53093050	4.09114882		79.00000000	0.43468354	3.70825511	1.709727
80	0.48937052	8.51056770	4.16482094		80.00000000	0.42925000	3.65316119	1.731103
81	0.49948564	8.47272110	4.23200252		81.00000000	0.42395062	3.59201534	1.752570
82	0.50933945	8.41100600	4.28405717		82.00000000	0.41878049	3.52236520	1.773999
83	0.51948434	8.35150340	4.33847523		83.00000000	0.41373494	3.45530876	1.795347
84	0.52926677	8.24135490	4.36187529		84.00000000	0.40880952	3.36914437	1.816720
85	0.53938258	8.11384770	4.37646811		85.00000000	0.40400000	3.27799447	1.838227
86	0.54950738	7.89242890	4.33694793		86.00000000	0.39930233	3.15146521	1.859609
87	0.55932850	7.61733580	4.26059301		87.00000000	0.39471264	3.00665875	1.880957
88	0.56946069	7.21892640	4.11089481		88.00000000	0.39022727	2.81702196	1.902336
89	0.57927287	6.69437120	3.87786762		89.00000000	0.38584270	2.58297424	1.923826
90	0.58935523	5.98936460	3.52986335		90.00000000	0.38155556	2.28527534	1.945203
91	0.59917337	5.08728460	3.04816546		91.00000000	0.37736264	1.91975113	1.966554
92	0.60931301	3.93233680	2.39602397		92.00000000	0.37326087	1.46778745	1.988030
93	0.61906940	2.52324960	1.56206662		93.00000000	0.36924731	0.93170313	2.009537
94	0.62911749	0.79290819	0.49883241		94.00000000	0.36531915	0.28966455	2.030990
95	0.63924152	-1.25558270	-0.80262059		95.00000000	0.36147368	-0.45386010	2.052342
96	0.64895916	-3.52620980	-2.28836615		96.00000000	0.35770833	-1.26135463	2.073724
97	0.65909880	-6.22991940	-4.10613240		97.00000000	0.35402062	-2.20551992	2.095211
98	0.66899955	-9.16636090	-6.13229132		98.00000000	0.35040816	-3.21196769	2.116585
99	0.67157191	-10.00040300	-6.71598974		99.00000000	0.34686869	-3.46882666	2.137944
100	0.67154288	-10.00033000	-6.71565041		100.00000000	0.34340000	-3.43411332	2.159312
101	0.67155033	-10.00027300	-6.71568663		101.00000000	0.34000000	-3.40009282	2.180797
00:58 03/04/2018
Test Lot:	JK-PERC
Recipe:	Recipe_YJX-LID
Cell Name:	1-0-10h
Test Order:	2
Test Condition:	Light
1	-0.29981247	8.62276940	-2.58521379		1.00000000	34.34000000	296.10590120	0.000000
2	-0.28999856	8.62254520	-2.50052569		2.00000000	17.17000000	148.04910108	0.061795
3	-0.27986386	8.61820700	-2.41192468		3.00000000	11.44666667	98.64974279	0.083222
4	-0.27001199	8.62725640	-2.32946267		4.00000000	8.58500000	74.06499619	0.104768
5	-0.25989068	8.62292770	-2.24101854		5.00000000	6.86800000	59.22226744	0.126149
6	-0.24974702	8.62412550	-2.15384964		6.00000000	5.72333333	49.35874495	0.147488
7	-0.23989515	8.62345500	-2.06872503		7.00000000	4.90571429	42.30420639	0.168919
8	-0.22975969	8.62252240	-1.98110807		8.00000000	4.29250000	37.01217740	0.190422
9	-0.21998225	8.62721630	-1.89783445		9.00000000	3.81555556	32.91762308	0.211796
10	-0.20981926	8.62524410	-1.80974233		10.00000000	3.43400000	29.61908824	0.233167
11	-0.19999121	8.62470630	-1.72486545		11.00000000	3.12181818	26.92476494	0.254551
12	-0.18982002	8.62928390	-1.63801084		12.00000000	2.86166667	24.69413409	0.276024
13	-0.18005821	8.61190030	-1.55064335		13.00000000	2.64153846	22.74866587	0.297413
14	-0.16992573	8.62998680	-1.46645681		14.00000000	2.45285714	21.16812477	0.318759
15	-0.16012374	8.61494920	-1.37945789		15.00000000	2.28933333	19.72249037	0.340128
16	-0.14997636	8.61880590	-1.29261714		16.00000000	2.14625000	18.49811216	0.361619
17	-0.13980071	8.61711220	-1.20467840		17.00000000	2.02000000	17.40656664	0.382999
18	-0.12996671	8.62463470	-1.12091540		18.00000000	1.90777778	16.45388642	0.404367
19	-0.11985879	8.61419680	-1.03248721		19.00000000	1.80736842	15.56902727	0.425740
20	-0.11001659	8.61674120	-0.94798448		20.00000000	1.71700000	14.79494464	0.447214
21	-0.09986178	8.62146380	-0.86095470		21.00000000	1.63523810	14.09814604	0.468599
22	-0.09003150	8.60842230	-0.77502915		22.00000000	1.56090909	13.43696463	0.489979
23	-0.07989530	8.63265510	-0.68970853		23.00000000	1.49304348	12.88892940	0.511321
24	-0.07004342	8.62394710	-0.60405077		24.00000000	1.43083333	12.33943098	0.532793
25	-0.05992806	8.61794280	-0.51645662		25.00000000	1.37360000	11.83760623	0.554168
26	-0.04978665	8.61202910	-0.42876408		26.00000000	1.32076923	11.37450305	0.575546
27	-0.03995785	8.62513350	-0.34464180		27.00000000	1.27185185	10.96989201	0.597033
28	-0.02982388	8.62253570	-0.25715750		28.00000000	1.22642857	10.57492414	0.618402
29	-0.01998839	8.61715890	-0.17224312		29.00000000	1.18413793	10.20390471	0.639743
30	-0.00981795	8.63079450	-0.08473668		30.00000000	1.14466667	9.87938277	0.661145
31	-0.00066946	8.61860180	-0.00576983		31.00000000	1.10774194	9.54718664	0.682743
32	0.00946653	8.61746880	0.08157756		32.00000000	1.07312500	9.24762121	0.704114
33	0.01925932	8.61943340	0.16600446		33.00000000	1.04060606	8.96943464	0.725467
34	0.02944287	8.61704160	0.25371046		34.00000000	1.01000000	8.70321202	0.746842
35	0.03927586	8.62487700	0.33874942		35.00000000	0.98114286	8.46223646	0.768319
36	0.04943708	8.62512210	0.42640082		36.00000000	0.95388889	8.22740814	0.789707
37	0.05924401	8.61482720	0.51037688		37.00000000	0.92810811	7.99549097	0.811058
38	0.06939183	8.62250040	0.59833110		38.00000000	0.90368421	7.79201747	0.832438
39	0.07954784	8.62161450	0.68583078		39.00000000	0.88051282	7.59144210	0.853924
40	0.08935180	8.60941030	0.76926627		40.00000000	0.85850000	7.39117874	0.875299
41	0.09950334	8.61635780	0.85735636		41.00000000	0.83756098	7.21672505	0.896663
42	0.10929240	8.61657620	0.94172629		42.00000000	0.81761905	7.04507683	0.918045
43	0.11947446	8.61533160	1.02931209		43.00000000	0.79860465	6.88024389	0.939514
44	0.12928289	8.62571430	1.11515727		44.00000000	0.78045455	6.73197793	0.960901
45	0.13943890	8.60780530	1.20026290		45.00000000	0.76311111	6.56871187	0.982242
46	0.14925550	8.62647530	1.28754888		46.00000000	0.74652174	6.43985134	1.003613
47	0.15939589	8.61752410	1.37359792		47.00000000	0.73063830	6.29629314	1.025110
48	0.16953105	8.61464410	1.46044966		48.00000000	0.71541667	6.16305997	1.046492
49	0.17935808	8.62730980	1.54737772		49.00000000	0.70081633	6.04615956	1.067868
50	0.18949400	8.60380650	1.63036971		50.00000000	0.68680000	5.90909430	1.089232
51	0.19928975	8.62478640	1.71883153		51.00000000	0.67333333	5.80735618	1.110713
52	0.20943758	8.62789250	1.80700493		52.00000000	0.66038462	5.69772747	1.132105
53	0.21925865	8.61110590	1.88805945		53.00000000	0.64792453	5.57934673	1.153504
54	0.22942956	8.62366390	1.97852341		54.00000000	0.63592593	5.48401145	1.174851
55	0.23921937	8.61352250	2.06052143		55.00000000	0.62436364	5.37797023	1.196327
56	0.24940217	8.61561680	2.14875353		56.00000000	0.61321429	5.28321930	1.217748
57	0.25951576	8.62399390	2.23806233		57.00000000	0.60245614	5.19557808	1.239141
58	0.26935470	8.62237360	2.32247685		58.00000000	0.59206897	5.10503982	1.260633
59	0.27951518	8.61727050	2.40865791		59.00000000	0.58203390	5.01554354	1.282019
60	0.28931317	8.61897090	2.49358179		60.00000000	0.57233333	4.93292435	1.303358
61	0.29946619	8.62455460	2.58276251		61.00000000	0.56295082	4.85520008	1.324738
62	0.30926198	8.61044690	2.66288386		62.00000000	0.55387097	4.76907656	1.346218
63	0.31943583	8.61643410	2.75239778		63.00000000	0.54507937	4.69664043	1.367605
64	0.32927328	8.61517810	2.83674795		64.00000000	0.53656250	4.62258150	1.388958
65	0.33943748	8.61312680	2.92361806		65.00000000	0.52830769	4.55038114	1.410342
66	0.34924591	8.61235620	3.00783018		66.00000000	0.52030303	4.48103503	1.431821
67	0.35938033	8.60854630	3.09374221		67.00000000	0.51253731	4.41220119	1.453206
68	0.36952814	8.61327360	3.18284697		68.00000000	0.50500000	4.34970317	1.474547
69	0.37934923	8.62100890	3.27037309		69.00000000	0.49768116	4.29051370	1.495925
70	0.38950822	8.60880950	3.35320206		70.00000000	0.49057143	4.22323597	1.517416
71	0.39931440	8.60528180	3.43621294		71.00000000	0.48366197	4.16204756	1.538798
72	0.40949795	8.60169220	3.52237532		72.00000000	0.47694444	4.10252931	1.560165
73	0.41930115	8.60252000	3.60704653		73.00000000	0.47041096	4.04671968	1.581546
74	0.42945492	8.59335990	3.69046069		74.00000000	0.46405405	3.98778350	1.603017
75	0.43927899	8.58509250	3.77125076		75.00000000	0.45786667	3.93082769	1.624400
76	0.44942531	8.57856080	3.85542235		76.00000000	0.45184211	3.87615497	1.645739
77	0.45955452	8.56408410	3.93566356		77.00000000	0.44597403	3.81935906	1.667121
78	0.46941653	8.55554200	4.01611284		78.00000000	0.44025641	3.76663221	1.688603
79	0.47955990	8.53966330	4.09528008		79.00000000	0.43468354	3.71205111	1.709969
80	0.48938543	8.51135920	4.16533518		80.00000000	0.42925000	3.65350094	1.731339
81	0.49949008	8.47418310	4.23277039		81.00000000	0.42395062	3.59263516	1.752705
82	0.50931191	8.42502210	4.29096410		82.00000000	0.41878049	3.52823486	1.774178
83	0.51948279	8.35267540	4.33907112		83.00000000	0.41373494	3.45579365	1.795573
84	0.52923244	8.24176690	4.36181041		84.00000000	0.40880952	3.36931280	1.816963
85	0.53934824	8.11114120	4.37472973		85.00000000	0.40400000	3.27690104	1.838308
86	0.54947448	7.88950970	4.33508424		86.00000000	0.39930233	3.15029957	1.859782
87	0.55932605	7.61749980	4.26066607		87.00000000	0.39471264	3.00672348	1.881166
88	0.56942403	7.21678540	4.10941103		88.00000000	0.39022727	2.81618648	1.902547
89	0.57920641	6.69468640	3.87760528		89.00000000	0.38584270	2.58309585	1.924032
90	0.58932000	5.98932980	3.52963184		90.00000000	0.38155556	2.28526206	1.945396
91	0.59911948	5.09426160	3.05207136		91.00000000	0.37736264	1.92238399	1.966758
92	0.60926062	3.94090560	2.40103859		92.00000000	0.37326087	1.47098585	1.988236
93	0.61903626	2.54201390	1.57359878		93.00000000	0.36924731	0.93863180	2.009741
94	0.62906498	0.82305074	0.51775240		94.00000000	0.36531915	0.30067620	2.031143
95	0.63918674	-1.22679650	-0.78415206		95.00000000	0.36147368	-0.44345465	2.052497
96	0.64895129	-3.48732880	-2.26310652		96.00000000	0.35770833	-1.24744657	2.073870
97	0.65904623	-6.18392470	-4.07549226		97.00000000	0.35402062	-2.18923685	2.095361
98	0.66901696	-9.11407760	-6.09747249		98.00000000	0.35040816	-3.19364719	2.116729
99	0.67173213	-10.00050100	-6.71765784		99.00000000	0.34686869	-3.46886065	2.138075
100	0.67176116	-10.00041100	-6.71788769		100.00000000	0.34340000	-3.43414114	2.159568
101	0.67173213	-10.00030900	-6.71752887		101.00000000	0.34000000	-3.40010506	2.181065
00:59 03/04/2018
Test Lot:	JK-PERC
Recipe:	Recipe_YJX-LID
Cell Name:	1-0-10h
Test Order:	3
Test Condition:	Light
1	-0.29980823	8.62680050	-2.58638579		1.00000000	34.34000000	296.24432917	0.000000
2	-0.28998613	8.63469890	-2.50394292		2.00000000	17.17000000	148.25778011	0.061802
3	-0.27984768	8.60795690	-2.40891677		3.00000000	11.44666667	98.53241332	0.083230
4	-0.27002856	8.62170220	-2.32810583		4.00000000	8.58500000	74.01731339	0.104762
5	-0.25986853	8.61349870	-2.23837725		5.00000000	6.86800000	59.15750907	0.126159
6	-0.24975167	8.63273530	-2.15604006		6.00000000	5.72333333	49.40802170	0.147568
7	-0.23989160	8.62269020	-2.06851095		7.00000000	4.90571429	42.30045450	0.168962
8	-0.22974646	8.62186430	-1.98084280		8.00000000	4.29250000	37.00935251	0.190440
9	-0.21997498	8.61966800	-1.89611130		9.00000000	3.81555556	32.88882212	0.211829
10	-0.20976731	8.62139890	-1.80848766		10.00000000	3.43400000	29.60588382	0.233166
11	-0.19993627	8.61861320	-1.72317338		11.00000000	3.12181818	26.90574339	0.254546
12	-0.18981421	8.61759090	-1.63574121		12.00000000	2.86166667	24.66067263	0.276034
13	-0.18004867	8.62720300	-1.55331643		13.00000000	2.64153846	22.78908854	0.297411
14	-0.16988641	8.61200520	-1.46306265		14.00000000	2.45285714	21.12401847	0.318797
15	-0.16006728	8.62303730	-1.38026613		15.00000000	2.28933333	19.74100673	0.340167
16	-0.14994745	8.61956790	-1.29248223		16.00000000	2.14625000	18.49974761	0.361640
17	-0.13977997	8.62143710	-1.20510422		17.00000000	2.02000000	17.41530294	0.383038
18	-0.12995787	8.61857320	-1.12005142		18.00000000	1.90777778	16.44232243	0.404417
19	-0.11983506	8.62299060	-1.03333660		19.00000000	1.80736842	15.58492091	0.425766
20	-0.10999658	8.61830520	-0.94798410		20.00000000	1.71700000	14.79763003	0.447253
21	-0.09983730	8.62540910	-0.86113752		21.00000000	1.63523810	14.10459755	0.468637
22	-0.09002561	8.61711500	-0.77576104		22.00000000	1.56090909	13.45053314	0.490023
23	-0.07988047	8.61817170	-0.68842360		23.00000000	1.49304348	12.86730505	0.511494
24	-0.07006729	8.62424280	-0.60427736		24.00000000	1.43083333	12.33985407	0.532942
25	-0.05992736	8.61303810	-0.51615666		25.00000000	1.37360000	11.83086913	0.554323
26	-0.04978743	8.62488460	-0.42941086		26.00000000	1.32076923	11.39148220	0.575697
27	-0.03995789	8.61290650	-0.34415353		27.00000000	1.27185185	10.95434108	0.597055
28	-0.02982540	8.63331890	-0.25749215		28.00000000	1.22642857	10.58814897	0.618550
29	-0.01999138	8.60681720	-0.17206216		29.00000000	1.18413793	10.19165871	0.639923
30	-0.00982986	8.63650130	-0.08489563		30.00000000	1.14466667	9.88591515	0.661304
31	-0.00065830	8.60480590	-0.00566454		31.00000000	1.10774194	9.53190434	0.682789
32	0.00950599	8.62630370	0.08200153		32.00000000	1.07312500	9.25710216	0.704264
33	0.01931293	8.61701300	0.16641973		33.00000000	1.04060606	8.96691595	0.725659
34	0.02944959	8.61981010	0.25384988		34.00000000	1.01000000	8.70600820	0.747040
35	0.03929970	8.61747550	0.33866420		35.00000000	0.98114286	8.45497453	0.768400
36	0.04943115	8.62397580	0.42629307		36.00000000	0.95388889	8.22631469	0.789883
37	0.05923288	8.61615850	0.51035991		37.00000000	0.92810811	7.99672656	0.811256
38	0.06939039	8.62807560	0.59870550		38.00000000	0.90368421	7.79705569	0.832628
39	0.07950324	8.61541270	0.68495321		39.00000000	0.88051282	7.58598134	0.854124
40	0.08937195	8.61761090	0.77017268		40.00000000	0.85850000	7.39821896	0.875493
41	0.09950861	8.61532780	0.85729932		41.00000000	0.83756098	7.21586236	0.896844
42	0.10931183	8.62887860	0.94323851		42.00000000	0.81761905	7.05513550	0.918220
43	0.11947678	8.61375900	1.02914419		43.00000000	0.79860465	6.87898800	0.939695
44	0.12929414	8.61737350	1.11417590		44.00000000	0.78045455	6.72546832	0.961085
45	0.13945760	8.61822990	1.20187766		45.00000000	0.76311111	6.57666699	0.982444
46	0.14928167	8.61732010	1.28640794		46.00000000	0.74652174	6.43301679	1.003817
47	0.15940344	8.60806180	1.37215466		47.00000000	0.73063830	6.28937962	1.025282
48	0.16954383	8.61754700	1.46105192		48.00000000	0.71541667	6.16513675	1.046644
49	0.17934853	8.62062640	1.54609667		49.00000000	0.70081633	6.04147573	1.067985
50	0.18949488	8.62141230	1.63371349		50.00000000	0.68680000	5.92118597	1.089369
51	0.19930255	8.61534600	1.71706043		51.00000000	0.67333333	5.80099964	1.110852
52	0.20945112	8.61490250	1.80440098		52.00000000	0.66038462	5.68914907	1.132226
53	0.21928561	8.61897750	1.89001774		53.00000000	0.64792453	5.58444693	1.153578
54	0.22940217	8.62127020	1.97773809		54.00000000	0.63592593	5.48248923	1.174951
55	0.23924261	8.61624050	2.06137187		55.00000000	0.62436364	5.37966725	1.196422
56	0.24939193	8.61196040	2.14775343		56.00000000	0.61321429	5.28097715	1.217816
57	0.25952932	8.62369820	2.23810253		57.00000000	0.60245614	5.19539993	1.239158
58	0.26934966	8.61006260	2.31911743		58.00000000	0.59206897	5.09775086	1.260529
59	0.27947965	8.62401390	2.41023639		59.00000000	0.58203390	5.01946843	1.282058
60	0.28932527	8.60532000	2.48973653		60.00000000	0.57233333	4.92511148	1.303442
61	0.29945675	8.62246700	2.58205594		61.00000000	0.56295082	4.85402487	1.324817
62	0.30929717	8.60262010	2.66076605		62.00000000	0.55387097	4.76474152	1.346190
63	0.31944722	8.61355690	2.75157681		63.00000000	0.54507937	4.69507213	1.367670
64	0.32926384	8.61235430	2.83573685		64.00000000	0.53656250	4.62106635	1.389065
65	0.33941615	8.60933210	2.92214636		65.00000000	0.52830769	4.54837637	1.410451
66	0.34924242	8.61178020	3.00759896		66.00000000	0.52030303	4.48073533	1.431808
67	0.35939845	8.61324500	3.09558690		67.00000000	0.51253731	4.41460945	1.453271
68	0.36954850	8.60616970	3.18039710		68.00000000	0.50500000	4.34611570	1.474656
69	0.37935844	8.60712910	3.26518707		69.00000000	0.49768116	4.28360599	1.496041
70	0.38951594	8.58833500	3.34529338		70.00000000	0.49057143	4.21319177	1.517528
71	0.39934742	8.61635590	3.44091950		71.00000000	0.48366197	4.16740368	1.538910
72	0.40948185	8.59738160	3.52047172		72.00000000	0.47694444	4.10047339	1.560255
73	0.41932231	8.59621140	3.60458322		73.00000000	0.47041096	4.04375205	1.581637
74	0.42946267	8.59523870	3.69133416		74.00000000	0.46405405	3.98865536	1.603123
75	0.43928227	8.57351590	3.76619353		75.00000000	0.45786667	3.92552715	1.624500
76	0.44941670	8.58732890	3.85928902		76.00000000	0.45184211	3.88011677	1.645861
77	0.45958537	8.56602480	3.93681968		77.00000000	0.44597403	3.82022457	1.667228
78	0.46942434	8.55656620	4.01666044		78.00000000	0.44025641	3.76708312	1.688711
79	0.47957736	8.52975180	4.09067585		79.00000000	0.43468354	3.70774274	1.710089
80	0.48938653	8.50923440	4.16430470		80.00000000	0.42925000	3.65258887	1.731431
81	0.49950087	8.47002120	4.23078296		81.00000000	0.42395062	3.59087072	1.752812
82	0.50933015	8.41974830	4.28843166		82.00000000	0.41878049	3.52602630	1.774298
83	0.51947796	8.34553720	4.33532264		83.00000000	0.41373494	3.45284033	1.795676
84	0.52924246	8.24583050	4.36404362		84.00000000	0.40880952	3.37097404	1.817042
85	0.53935009	8.09371280	4.36534473		85.00000000	0.40400000	3.26985997	1.838423
86	0.54949051	7.88476370	4.33260283		86.00000000	0.39930233	3.14840448	1.859911
87	0.55931234	7.60078330	4.25121189		87.00000000	0.39471264	3.00012527	1.881308
88	0.56944227	7.21164180	4.10661368		88.00000000	0.39022727	2.81417931	1.902662
89	0.57921129	6.68427800	3.87160928		89.00000000	0.38584270	2.57907985	1.924063
90	0.58934569	5.98105810	3.52491081		90.00000000	0.38155556	2.28210595	1.945543
91	0.59911841	5.08690790	3.04766017		91.00000000	0.37736264	1.91960898	1.966925
92	0.60922974	3.92645600	2.39211377		92.00000000	0.37326087	1.46559238	1.988404
93	0.61904043	2.53528380	1.56944317		93.00000000	0.36924731	0.93614673	2.009786
94	0.62910414	0.80626529	0.50722483		94.00000000	0.36531915	0.29454415	2.031280
95	0.63919765	-1.22846440	-0.78523156		95.00000000	0.36147368	-0.44405755	2.052674
96	0.64897555	-3.48269200	-2.26018196		96.00000000	0.35770833	-1.24578795	2.074053
97	0.65907204	-6.16793110	-4.06511093		97.00000000	0.35402062	-2.18357478	2.095462
98	0.66901964	-9.10473060	-6.09124359		98.00000000	0.35040816	-3.19037193	2.116960
99	0.67186439	-10.00031000	-6.71885218		99.00000000	0.34686869	-3.46879440	2.138337
100	0.67182642	-10.00026100	-6.71843955		100.00000000	0.34340000	-3.43408963	2.159719
101	0.67181748	-10.00015300	-6.71827759		101.00000000	0.34000000	-3.40005202	2.181208
00:59 03/04/2018
Test Lot:	JK-PERC
Recipe:	Recipe_YJX-LID
Cell Name:	1-0-10h
Test Order:	4
Test Condition:	Light
1	-0.29978079	8.62425610	-2.58538631		1.00000000	34.34000000	296.15695447	0.000000
2	-0.29000929	8.61354920	-2.49800929		2.00000000	17.17000000	147.89463976	0.061796
3	-0.27986938	8.62572770	-2.41407706		3.00000000	11.44666667	98.73582974	0.083274
4	-0.27004799	8.61295700	-2.32591173		4.00000000	8.58500000	73.94223585	0.104773
5	-0.25987309	8.62921240	-2.24250009		5.00000000	6.86800000	59.26543076	0.126171
6	-0.24972348	8.61423970	-2.15117792		6.00000000	5.72333333	49.30216522	0.147519
7	-0.23995347	8.62324140	-2.06917670		7.00000000	4.90571429	42.30315853	0.168896
8	-0.22977260	8.61310010	-1.97905440		8.00000000	4.29250000	36.97173218	0.190354
9	-0.21991029	8.61611270	-1.89477184		9.00000000	3.81555556	32.87525668	0.211730
10	-0.20979865	8.62500570	-1.80951455		10.00000000	3.43400000	29.61826957	0.233118
11	-0.19997430	8.62251380	-1.72428116		11.00000000	3.12181818	26.91792035	0.254470
12	-0.18981352	8.61106110	-1.63449582		12.00000000	2.86166667	24.64198651	0.275941
13	-0.18002342	8.62169930	-1.55210779		13.00000000	2.64153846	22.77455030	0.297318
14	-0.16989689	8.61669830	-1.46395024		14.00000000	2.45285714	21.13552997	0.318713
15	-0.16007106	8.61869240	-1.37960323		15.00000000	2.28933333	19.73105980	0.340102
16	-0.14993261	8.61276150	-1.29133381		16.00000000	2.14625000	18.48513937	0.361569
17	-0.13978299	8.61381440	-1.20406473		17.00000000	2.02000000	17.39990509	0.382945
18	-0.12994899	8.61505790	-1.11951807		18.00000000	1.90777778	16.43561602	0.404331
19	-0.11975174	8.61790470	-1.03200908		19.00000000	1.80736842	15.57572881	0.425823
20	-0.10995047	8.62335680	-0.94814213		20.00000000	1.71700000	14.80630363	0.447212
21	-0.09977481	8.61184500	-0.85924518		21.00000000	1.63523810	14.08241701	0.468556
22	-0.08996907	8.62105180	-0.77562800		22.00000000	1.56090909	13.45667813	0.489937
23	-0.07982542	8.62238690	-0.68828562		23.00000000	1.49304348	12.87359853	0.511422
24	-0.07001894	8.61477570	-0.60319746		24.00000000	1.43083333	12.32630823	0.532795
25	-0.05987379	8.62300300	-0.51629190		25.00000000	1.37360000	11.84455692	0.554151
26	-0.04974651	8.61119460	-0.42837688		26.00000000	1.32076923	11.37340087	0.575526
27	-0.03990877	8.61634250	-0.34386763		27.00000000	1.27185185	10.95871116	0.597005
28	-0.02975544	8.61952880	-0.25647787		28.00000000	1.22642857	10.57123639	0.618400
29	-0.01990802	8.61905960	-0.17158845		29.00000000	1.18413793	10.20615540	0.639743
30	-0.00980010	8.61557010	-0.08443341		30.00000000	1.14466667	9.86195591	0.661109
31	-0.00062853	8.61584190	-0.00541529		31.00000000	1.10774194	9.54412938	0.682704
32	0.00951939	8.62262540	0.08208211		32.00000000	1.07312500	9.25315488	0.704089
33	0.01932558	8.61334900	0.16645800		33.00000000	1.04060606	8.96310317	0.725461
34	0.02947788	8.61134150	0.25384412		34.00000000	1.01000000	8.69745492	0.746834
35	0.03930865	8.62190150	0.33891527		35.00000000	0.98114286	8.45931707	0.768314
36	0.04943861	8.61077880	0.42570497		36.00000000	0.95388889	8.21372622	0.789701
37	0.05927384	8.61792470	0.51081748		37.00000000	0.92810811	7.99836579	0.811051
38	0.06938818	8.62376690	0.59838750		38.00000000	0.90368421	7.79316198	0.832428
39	0.07956132	8.61003780	0.68502593		39.00000000	0.88051282	7.58124867	0.853903
40	0.08938761	8.61538790	0.77010894		40.00000000	0.85850000	7.39631051	0.875274
41	0.09956224	8.62532420	0.85875662		41.00000000	0.83756098	7.22423495	0.896669
42	0.10932899	8.61015990	0.94134009		42.00000000	0.81761905	7.03983074	0.918039
43	0.11946566	8.62183280	1.03001295		43.00000000	0.79860465	6.88543578	0.939519
44	0.12930088	8.61622240	1.11408514		44.00000000	0.78045455	6.72456994	0.960907
45	0.13946658	8.60642810	1.20030909		45.00000000	0.76311111	6.56766091	0.982302
46	0.14926608	8.63544560	1.28897911		46.00000000	0.74652174	6.44654787	1.003649
47	0.15943624	8.61703680	1.37386795		47.00000000	0.73063830	6.29593710	1.025126
48	0.16958483	8.62444970	1.46257584		48.00000000	0.71541667	6.17007506	1.046500
49	0.17939772	8.60634140	1.54395802		49.00000000	0.70081633	6.03146456	1.067881
50	0.18953067	8.60808750	1.63149659		50.00000000	0.68680000	5.91203450	1.089383
51	0.19933537	8.63152030	1.72056729		51.00000000	0.67333333	5.81189034	1.110759
52	0.20951521	8.60971740	1.80386675		52.00000000	0.66038462	5.68572491	1.132109
53	0.21931769	8.61468410	1.88935262		53.00000000	0.64792453	5.58166513	1.153495
54	0.22946924	8.61239910	1.97628068		54.00000000	0.63592593	5.47684787	1.174975
55	0.23928660	8.61324210	2.06103342		55.00000000	0.62436364	5.37779516	1.196361
56	0.24942774	8.61647130	2.14918696		56.00000000	0.61321429	5.28374329	1.217722
57	0.25958303	8.60217000	2.23297735		57.00000000	0.60245614	5.18243014	1.239099
58	0.26937655	8.61680790	2.32116598		58.00000000	0.59206897	5.10174454	1.260565
59	0.27956235	8.61538980	2.40853862		59.00000000	0.58203390	5.01444891	1.281948
60	0.28939164	8.61401650	2.49282436		60.00000000	0.57233333	4.93008878	1.303297
61	0.29952011	8.61785320	2.58122034		61.00000000	0.56295082	4.85142752	1.324683
62	0.30933896	8.60599140	2.66216843		62.00000000	0.55387097	4.76660879	1.346159
63	0.31950763	8.61174680	2.75151881		63.00000000	0.54507937	4.69408548	1.367520
64	0.32930416	8.61709500	2.83764523		64.00000000	0.53656250	4.62361004	1.388881
65	0.33945051	8.61548330	2.92453020		65.00000000	0.52830769	4.55162610	1.410257
66	0.34928051	8.60886670	3.00690935		66.00000000	0.52030303	4.47921943	1.431730
67	0.35940677	8.61962700	3.09795230		67.00000000	0.51253731	4.41788047	1.453117
68	0.36954045	8.61030010	3.18185417		68.00000000	0.50500000	4.34820155	1.474460
69	0.37939206	8.60438730	3.26443622		69.00000000	0.49768116	4.28224145	1.495824
70	0.38954210	8.61010840	3.35399971		70.00000000	0.49057143	4.22387318	1.517293
71	0.39937511	8.60657020	3.43724992		71.00000000	0.48366197	4.16267071	1.538664
72	0.40951028	8.59635540	3.52029591		72.00000000	0.47694444	4.09998395	1.560009
73	0.41932690	8.59874530	3.60568521		73.00000000	0.47041096	4.04494402	1.581386
74	0.42946580	8.58891770	3.68864641		74.00000000	0.46405405	3.98572208	1.602863
75	0.43930030	8.59211160	3.77451720		75.00000000	0.45786667	3.93404150	1.624238
76	0.44941688	8.57019420	3.85158994		76.00000000	0.45184211	3.87237459	1.645620
77	0.45957735	8.55847930	3.93328324		77.00000000	0.44597403	3.81685947	1.666959
78	0.46944755	8.55472280	4.01599366		78.00000000	0.44025641	3.76627155	1.688432
79	0.47959688	8.53542330	4.09356238		79.00000000	0.43468354	3.71020805	1.709809
80	0.48938820	8.52718450	4.17310347		80.00000000	0.42925000	3.66029395	1.731193
81	0.49952933	8.47840880	4.23521387		81.00000000	0.42395062	3.59442664	1.752680
82	0.50932735	8.41050240	4.28369890		82.00000000	0.41878049	3.52215430	1.774058
83	0.51949376	8.36204050	4.34402786		83.00000000	0.41373494	3.45966832	1.795403
84	0.52928436	8.25879570	4.37125140		84.00000000	0.40880952	3.37627434	1.816784
85	0.53940392	8.09873490	4.36848935		85.00000000	0.40400000	3.27188890	1.838268
86	0.54952788	7.89900830	4.34072529		86.00000000	0.39930233	3.15409238	1.859649
87	0.55935794	7.61755800	4.26094155		87.00000000	0.39471264	3.00674646	1.881002
88	0.56948119	7.23253770	4.11879418		88.00000000	0.39022727	2.82233346	1.902370
89	0.57926732	6.70474580	3.88384013		89.00000000	0.38584270	2.58697720	1.923845
90	0.58938980	6.00668670	3.54027987		90.00000000	0.38155556	2.29188468	1.945249
91	0.59917963	5.10584830	3.05932030		91.00000000	0.37736264	1.92675638	1.966594
92	0.60930216	3.93812250	2.39950655		92.00000000	0.37326087	1.46994703	1.988052
93	0.61912400	2.55336760	1.58085116		93.00000000	0.36924731	0.94282412	2.009560
94	0.62915647	0.80663306	0.50749841		94.00000000	0.36531915	0.29467850	2.030933
95	0.63924921	-1.24695840	-0.79711717		95.00000000	0.36147368	-0.45074265	2.052297
96	0.64897650	-3.52667090	-2.28872654		96.00000000	0.35770833	-1.26151957	2.073715
97	0.65908641	-6.25198940	-4.12060125		97.00000000	0.35402062	-2.21333315	2.095210
98	0.66907048	-9.23774810	-6.18070456		98.00000000	0.35040816	-3.23698234	2.116596
99	0.67141056	-10.00036400	-6.71434999		99.00000000	0.34686869	-3.46881313	2.137935
100	0.67136073	-10.00052600	-6.71396044		100.00000000	0.34340000	-3.43418063	2.159303
101	0.67137110	-10.00038000	-6.71396612		101.00000000	0.34000000	-3.40012920	2.180796
