# Supplementary material for: Study on the Electrical Injection Regeneration of Industrialized B-Doped Czochralski Silicon PERC Solar Cells
Source: Hindawi journal article supplement (doi:10.1155/2019/5357370), 2019-06-20
Supplement: f1 [file 5357370.f1.zip › section3.1/IVRawData_1-0-11h.csv]

01:55 03/04/2018
Test Lot:	JK-PERC
Recipe:	Recipe_YJX-LID
Cell Name:	1-0-11h
Test Order:	2
Test Condition:	Light
1	-0.29977924	8.63592150	-2.58886998		1.00000000	34.34000000	296.55754431	0.000000
2	-0.28997287	8.63196280	-2.50303503		2.00000000	17.17000000	148.21080128	0.061715
3	-0.27993059	8.63460160	-2.41708912		3.00000000	11.44666667	98.83740631	0.083229
4	-0.27009371	8.63282390	-2.33167143		4.00000000	8.58500000	74.11279318	0.104614
5	-0.25992858	8.62518410	-2.24193186		5.00000000	6.86800000	59.23776440	0.125978
6	-0.24980591	8.65397640	-2.16181445		6.00000000	5.72333333	49.52959160	0.147354
7	-0.23992586	8.63409710	-2.07154317		7.00000000	4.90571429	42.35641349	0.168829
8	-0.22979350	8.63043790	-1.98321853		8.00000000	4.29250000	37.04615469	0.190278
9	-0.22001246	8.63573460	-1.89996921		9.00000000	3.81555556	32.95012513	0.211636
10	-0.20984660	8.62847040	-1.81065518		10.00000000	3.43400000	29.63016735	0.233009
11	-0.19998293	8.63649370	-1.72715132		11.00000000	3.12181818	26.96156306	0.254494
12	-0.18989225	8.63100150	-1.63896029		12.00000000	2.86166667	24.69904929	0.275872
13	-0.18010375	8.63511370	-1.55521636		13.00000000	2.64153846	22.80998496	0.297209
14	-0.16996023	8.63532920	-1.46766254		14.00000000	2.45285714	21.18122891	0.318584
15	-0.16007498	8.62409970	-1.38050259		15.00000000	2.28933333	19.74343891	0.340055
16	-0.14999917	8.63756660	-1.29562782		16.00000000	2.14625000	18.53837732	0.361440
17	-0.13983257	8.62823010	-1.20650759		17.00000000	2.02000000	17.42902480	0.382794
18	-0.13000166	8.63235190	-1.12222008		18.00000000	1.90777778	16.46860912	0.404166
19	-0.11985143	8.64622120	-1.03626197		19.00000000	1.80736842	15.62690716	0.425640
20	-0.10998553	8.62363910	-0.94847552		20.00000000	1.71700000	14.80678833	0.447027
21	-0.09981670	8.64078620	-0.86249472		21.00000000	1.63523810	14.12974277	0.468372
22	-0.09004160	8.62989040	-0.77704914		22.00000000	1.56090909	13.47047438	0.489753
23	-0.07990254	8.63135530	-0.68966719		23.00000000	1.49304348	12.88698874	0.511227
24	-0.07006790	8.64580730	-0.60579354		24.00000000	1.43083333	12.37070928	0.532593
25	-0.05991470	8.62547780	-0.51679289		25.00000000	1.37360000	11.84795631	0.553965
26	-0.04973842	8.63473130	-0.42947785		26.00000000	1.32076923	11.40448742	0.575326
27	-0.03994099	8.62957000	-0.34467360		27.00000000	1.27185185	10.97553459	0.596808
28	-0.02982352	8.62643430	-0.25727060		28.00000000	1.22642857	10.57970550	0.618206
29	-0.01998292	8.63651080	-0.17258273		29.00000000	1.18413793	10.22682003	0.639574
30	-0.00986693	8.62789250	-0.08513084		30.00000000	1.14466667	9.87606095	0.660924
31	-0.00069474	8.63494210	-0.00599900		31.00000000	1.10774194	9.56528747	0.682511
32	0.00949399	8.62144470	0.08185190		32.00000000	1.07312500	9.25188784	0.703888
33	0.01928667	8.64195920	0.16667458		33.00000000	1.04060606	8.99287512	0.725274
34	0.02942767	8.62302680	0.25375562		34.00000000	1.01000000	8.70925707	0.746754
35	0.03925310	8.62113090	0.33840612		35.00000000	0.98114286	8.45856100	0.768126
36	0.04943802	8.63235380	0.42676650		36.00000000	0.95388889	8.23430637	0.789486
37	0.05918530	8.63470460	0.51104755		37.00000000	0.92810811	8.01393935	0.810862
38	0.06935905	8.62525460	0.59823946		38.00000000	0.90368421	7.79450639	0.832342
39	0.07954844	8.62747190	0.68630194		39.00000000	0.88051282	7.59659962	0.853734
40	0.08933590	8.62358570	0.77039582		40.00000000	0.85850000	7.40334832	0.875085
41	0.09947766	8.63514230	0.85900372		41.00000000	0.83756098	7.23245821	0.896452
42	0.10928224	8.62490370	0.94254880		42.00000000	0.81761905	7.05188555	0.917939
43	0.11943516	8.63550090	1.03138243		43.00000000	0.79860465	6.89635118	0.939316
44	0.12928812	8.63360020	1.11622194		44.00000000	0.78045455	6.73813252	0.960674
45	0.13944328	8.62409970	1.20257275		45.00000000	0.76311111	6.58114630	0.982054
46	0.14925084	8.62479880	1.28725847		46.00000000	0.74652174	6.43859980	1.003531
47	0.15948264	8.62521270	1.37557169		47.00000000	0.73063830	6.30191073	1.024915
48	0.16954327	8.63234330	1.46355571		48.00000000	0.71541667	6.17572227	1.046260
49	0.17939252	8.63514710	1.54908080		49.00000000	0.70081633	6.05165207	1.067638
50	0.18949407	8.62833310	1.63501796		50.00000000	0.68680000	5.92593917	1.089110
51	0.19930312	8.64346790	1.72267012		51.00000000	0.67333333	5.81993505	1.110498
52	0.20946944	8.62886430	1.80748337		52.00000000	0.66038462	5.69836923	1.131836
53	0.21928668	8.63023760	1.89249615		53.00000000	0.64792453	5.59174263	1.153217
54	0.22941428	8.63045790	1.97995029		54.00000000	0.63592593	5.48833193	1.174690
55	0.23925981	8.62118050	2.06270201		55.00000000	0.62436364	5.38275161	1.196083
56	0.24935393	8.64175420	2.15485537		56.00000000	0.61321429	5.29924713	1.217463
57	0.25952321	8.61828900	2.23664603		57.00000000	0.60245614	5.19214113	1.238821
58	0.26939180	8.63487820	2.32616538		58.00000000	0.59206897	5.11244340	1.260304
59	0.27951497	8.61333080	2.40755490		59.00000000	0.58203390	5.01325050	1.281680
60	0.28932104	8.63089470	2.49709943		60.00000000	0.57233333	4.93974873	1.303064
61	0.29947543	8.63291070	2.58534464		61.00000000	0.56295082	4.85990415	1.324417
62	0.30926365	8.61332890	2.66378953		62.00000000	0.55387097	4.77067281	1.345891
63	0.31945080	8.62570480	2.75548830		63.00000000	0.54507937	4.70169370	1.367265
64	0.32928663	8.62361430	2.83964089		64.00000000	0.53656250	4.62710805	1.388653
65	0.33939564	8.62201880	2.92627559		65.00000000	0.52830769	4.55507886	1.410134
66	0.34923670	8.61252310	3.00780915		66.00000000	0.52030303	4.48112187	1.431517
67	0.35938963	8.63306140	3.10263274		67.00000000	0.51253731	4.42476610	1.452877
68	0.36949790	8.61378000	3.18277362		68.00000000	0.50500000	4.34995890	1.474257
69	0.37931958	8.62899400	3.27314638		69.00000000	0.49768116	4.29448774	1.495740
70	0.38946804	8.61475280	3.35517089		70.00000000	0.49057143	4.22615159	1.517123
71	0.39935821	8.60790060	3.43763578		71.00000000	0.48366197	4.16331418	1.538462
72	0.40946648	8.62227060	3.53053079		72.00000000	0.47694444	4.11234406	1.559841
73	0.41927031	8.60585310	3.60817870		73.00000000	0.47041096	4.04828761	1.581323
74	0.42940611	8.61408520	3.69894082		74.00000000	0.46405405	3.99740116	1.602684
75	0.43922856	8.58731080	3.77179216		75.00000000	0.45786667	3.93184337	1.624048
76	0.44939935	8.59605220	3.86306027		76.00000000	0.45184211	3.88405832	1.645418
77	0.45952770	8.57855610	3.94208415		77.00000000	0.44597403	3.82581320	1.666892
78	0.46940970	8.58313850	4.02900847		78.00000000	0.44025641	3.77878174	1.688332
79	0.47952464	8.55296990	4.10135981		79.00000000	0.43468354	3.71783527	1.709688
80	0.48937017	8.52286820	4.17083746		80.00000000	0.42925000	3.65844117	1.731077
81	0.49951342	8.48818870	4.23996417		81.00000000	0.42395062	3.59857284	1.752568
82	0.50929344	8.43546770	4.29612836		82.00000000	0.41878049	3.53260928	1.773940
83	0.51940763	8.34865280	4.33635396		83.00000000	0.41373494	3.45412936	1.795282
84	0.52923161	8.27440260	4.37907541		84.00000000	0.40880952	3.38265459	1.816660
85	0.53932643	8.10312270	4.37022824		85.00000000	0.40400000	3.27366157	1.838146
86	0.54947788	7.90632340	4.34434982		86.00000000	0.39930233	3.15701332	1.859535
87	0.55928171	7.61431220	4.25854555		87.00000000	0.39471264	3.00546530	1.880907
88	0.56938475	7.22989370	4.11659122		88.00000000	0.39022727	2.82130170	1.902263
89	0.57921094	6.70134540	3.88149257		89.00000000	0.38584270	2.58566518	1.923732
90	0.58930582	5.99245500	3.53138861		90.00000000	0.38155556	2.28645450	1.945104
91	0.59912008	5.10675480	3.05955934		91.00000000	0.37736264	1.92709846	1.966477
92	0.60925585	3.91464880	2.38502268		92.00000000	0.37326087	1.46118522	1.987952
93	0.61902171	2.51944300	1.55958991		93.00000000	0.36924731	0.93029756	2.009446
94	0.62915528	0.77278680	0.48620290		94.00000000	0.36531915	0.28231382	2.030824
95	0.63920027	-1.28586200	-0.82192334		95.00000000	0.36147368	-0.46480527	2.052216
96	0.64891559	-3.56731200	-2.31488437		96.00000000	0.35770833	-1.27605723	2.073701
97	0.65903127	-6.29044100	-4.14559732		97.00000000	0.35402062	-2.22694581	2.095084
98	0.66900557	-9.26186280	-6.19623780		98.00000000	0.35040816	-3.24543233	2.116451
99	0.67127270	-10.00044600	-6.71302639		99.00000000	0.34686869	-3.46884157	2.137824
100	0.67123771	-10.00056600	-6.71275702		100.00000000	0.34340000	-3.43419436	2.159305
101	0.67122799	-10.00047700	-6.71260008		101.00000000	0.34000000	-3.40016218	2.180729
01:55 03/04/2018
Test Lot:	JK-PERC
Recipe:	Recipe_YJX-LID
Cell Name:	1-0-11h
Test Order:	3
Test Condition:	Light
1	-0.29982054	8.62949750	-2.58730060		1.00000000	34.34000000	296.33694415	0.000000
2	-0.28996956	8.63066390	-2.50262981		2.00000000	17.17000000	148.18849916	0.061755
3	-0.27982682	8.63059040	-2.41507067		3.00000000	11.44666667	98.79149145	0.083322
4	-0.26999369	8.63598440	-2.33166129		4.00000000	8.58500000	74.13992607	0.104734
5	-0.25984350	8.63752650	-2.24440512		5.00000000	6.86800000	59.32253200	0.126109
6	-0.24970448	8.62739470	-2.15429911		6.00000000	5.72333333	49.37745567	0.147480
7	-0.23987509	8.64160630	-2.07290609		7.00000000	4.90571429	42.39325148	0.168959
8	-0.22975840	8.62042900	-1.98061597		8.00000000	4.29250000	37.00319148	0.190322
9	-0.21992974	8.63582230	-1.89927415		9.00000000	3.81555556	32.95045975	0.211666
10	-0.20976913	8.63036350	-1.81038384		10.00000000	3.43400000	29.63666826	0.233051
11	-0.19996803	8.64039990	-1.72780375		11.00000000	3.12181818	26.97375751	0.254534
12	-0.18977170	8.61930270	-1.63569973		12.00000000	2.86166667	24.66557123	0.275910
13	-0.17997356	8.64564510	-1.55598753		13.00000000	2.64153846	22.83780406	0.297260
14	-0.16985241	8.62524700	-1.46501899		14.00000000	2.45285714	21.15649871	0.318638
15	-0.16003565	8.64743710	-1.38389822		15.00000000	2.28933333	19.79686600	0.340109
16	-0.14988771	8.62124350	-1.29221845		16.00000000	2.14625000	18.50334386	0.361501
17	-0.13976282	8.62827970	-1.20591270		17.00000000	2.02000000	17.42912499	0.382845
18	-0.12992673	8.62336160	-1.12040517		18.00000000	1.90777778	16.45145763	0.404210
19	-0.11982120	8.63383480	-1.03451645		19.00000000	1.80736842	15.60452037	0.425692
20	-0.10998139	8.61958120	-0.94799352		20.00000000	1.71700000	14.79982092	0.447058
21	-0.09981110	8.62182430	-0.86055376		21.00000000	1.63523810	14.09873555	0.468400
22	-0.09004498	8.61872390	-0.77607278		22.00000000	1.56090909	13.45304449	0.489782
23	-0.07986129	8.62905690	-0.68912762		23.00000000	1.49304348	12.88355713	0.511253
24	-0.07004754	8.62342450	-0.60404963		24.00000000	1.43083333	12.33868322	0.532642
25	-0.05991074	8.63072590	-0.51707318		25.00000000	1.37360000	11.85516510	0.553997
26	-0.04977395	8.62956240	-0.42952737		26.00000000	1.32076923	11.39766049	0.575371
27	-0.03990585	8.62986660	-0.34438220		27.00000000	1.27185185	10.97591182	0.596841
28	-0.02976087	8.62296580	-0.25662699		28.00000000	1.22642857	10.57545163	0.618223
29	-0.01991585	8.61904240	-0.17165556		29.00000000	1.18413793	10.20613504	0.639601
30	-0.00981255	8.63716890	-0.08475268		30.00000000	1.14466667	9.88667933	0.660970
31	-0.00063890	8.61670590	-0.00550522		31.00000000	1.10774194	9.54508647	0.682559
32	0.00950438	8.62747670	0.08199883		32.00000000	1.07312500	9.25836093	0.703931
33	0.01933201	8.64233210	0.16707361		33.00000000	1.04060606	8.99326316	0.725325
34	0.02945734	8.63904290	0.25448326		34.00000000	1.01000000	8.72543333	0.746739
35	0.03931101	8.61906240	0.33882408		35.00000000	0.98114286	8.45653151	0.768202
36	0.04947655	8.64200210	0.42757641		36.00000000	0.95388889	8.24350978	0.789574
37	0.05930863	8.61350540	0.51085523		37.00000000	0.92810811	7.99426420	0.810934
38	0.06944216	8.63791850	0.59983572		38.00000000	0.90368421	7.80595056	0.832309
39	0.07959281	8.62685780	0.68663585		39.00000000	0.88051282	7.59605889	0.853795
40	0.08939140	8.62807080	0.77127535		40.00000000	0.85850000	7.40719878	0.875172
41	0.09957331	8.62526230	0.85884589		41.00000000	0.83756098	7.22418311	0.896543
42	0.10935925	8.62882800	0.94364216		42.00000000	0.81761905	7.05509413	0.917895
43	0.11951733	8.63075070	1.03152428		43.00000000	0.79860465	6.89255765	0.939363
44	0.12935166	8.62505530	1.11566522		44.00000000	0.78045455	6.73146361	0.960753
45	0.13948369	8.62130360	1.20253124		45.00000000	0.76311111	6.57901257	0.982138
46	0.14925624	8.62793250	1.28777276		46.00000000	0.74652174	6.44093918	1.003484
47	0.15942401	8.62564280	1.37513456		47.00000000	0.73063830	6.30222497	1.024951
48	0.16962452	8.62909510	1.46370611		48.00000000	0.71541667	6.17339845	1.046329
49	0.17943576	8.63127800	1.54875993		49.00000000	0.70081633	6.04894054	1.067715
50	0.18950304	8.62533860	1.63452789		50.00000000	0.68680000	5.92388255	1.089194
51	0.19935746	8.63407040	1.72126634		51.00000000	0.67333333	5.81360740	1.110564
52	0.20946568	8.62864780	1.80740558		52.00000000	0.66038462	5.69822626	1.131929
53	0.21933797	8.62858490	1.89257630		53.00000000	0.64792453	5.59067180	1.153308
54	0.22942534	8.64554690	1.98350754		54.00000000	0.63592593	5.49792742	1.174790
55	0.23924255	8.62383170	2.06318749		55.00000000	0.62436364	5.38440692	1.196168
56	0.24939914	8.61355690	2.14821368		56.00000000	0.61321429	5.28195614	1.217512
57	0.25952077	8.62386040	2.23807089		57.00000000	0.60245614	5.19549765	1.238887
58	0.26939082	8.63026520	2.32491422		58.00000000	0.59206897	5.10971219	1.260370
59	0.27953476	8.62371830	2.41062903		59.00000000	0.58203390	5.01929638	1.281741
60	0.28932592	8.62139230	2.49439226		60.00000000	0.57233333	4.93431019	1.303087
61	0.29949144	8.62308790	2.58254101		61.00000000	0.56295082	4.85437440	1.324472
62	0.30930418	8.62620830	2.66812228		62.00000000	0.55387097	4.77780634	1.345956
63	0.31947118	8.61236860	2.75140356		63.00000000	0.54507937	4.69442441	1.367342
64	0.32925117	8.62708760	2.84047869		64.00000000	0.53656250	4.62897169	1.388706
65	0.33944052	8.61755080	2.92514592		65.00000000	0.52830769	4.55271838	1.410078
66	0.34925103	8.62289710	3.01155569		66.00000000	0.52030303	4.48651949	1.431549
67	0.35940912	8.62377550	3.09946356		67.00000000	0.51253731	4.42000673	1.452955
68	0.36960518	8.61966800	3.18587394		68.00000000	0.50500000	4.35293234	1.474302
69	0.37940526	8.61839680	3.26986508		69.00000000	0.49768116	4.28921371	1.495679
70	0.38952985	8.61488060	3.35575315		70.00000000	0.49057143	4.22621428	1.517164
71	0.39935523	8.62134740	3.44298017		71.00000000	0.48366197	4.16981788	1.538532
72	0.40953118	8.60430050	3.52372934		72.00000000	0.47694444	4.10377332	1.559910
73	0.41933128	8.61595540	3.61293961		73.00000000	0.47041096	4.05303984	1.581281
74	0.42950648	8.61138250	3.69864459		74.00000000	0.46405405	3.99614696	1.602757
75	0.43932813	8.60101220	3.77866661		75.00000000	0.45786667	3.93811679	1.624140
76	0.44943562	8.58378890	3.85786049		76.00000000	0.45184211	3.87851725	1.645520
77	0.45954236	8.59061910	3.94775338		77.00000000	0.44597403	3.83119299	1.666866
78	0.46944886	8.57137970	4.02382443		78.00000000	0.44025641	3.77360486	1.688323
79	0.47960845	8.55198760	4.10160552		79.00000000	0.43468354	3.71740828	1.709688
80	0.48938471	8.52001670	4.16956590		80.00000000	0.42925000	3.65721717	1.731068
81	0.49951825	8.49622250	4.24401819		81.00000000	0.42395062	3.60197877	1.752549
82	0.50934809	8.43366240	4.29566984		82.00000000	0.41878049	3.53185325	1.773930
83	0.51945782	8.36693100	4.34626774		83.00000000	0.41373494	3.46169169	1.795287
84	0.52927727	8.25321010	4.36823651		84.00000000	0.40880952	3.37399089	1.816678
85	0.53937876	8.11527540	4.37720718		85.00000000	0.40400000	3.27857126	1.838152
86	0.54953611	7.90533540	4.34426726		86.00000000	0.39930233	3.15661881	1.859538
87	0.55931830	7.63131190	4.26833240		87.00000000	0.39471264	3.01217529	1.880900
88	0.56946522	7.25006200	4.12865815		88.00000000	0.39022727	2.82917192	1.902275
89	0.57921845	6.71694760	3.89057998		89.00000000	0.38584270	2.59168518	1.923766
90	0.58932370	6.00524760	3.53903474		90.00000000	0.38155556	2.29133558	1.945135
91	0.59913790	5.12077330	3.06804936		91.00000000	0.37736264	1.93238852	1.966470
92	0.60927290	3.94494610	2.40354875		92.00000000	0.37326087	1.47249401	1.987958
93	0.61905289	2.52010920	1.56008088		93.00000000	0.36924731	0.93054355	2.009468
94	0.62914330	0.77866477	0.48989172		94.00000000	0.36531915	0.28446115	2.030856
95	0.63925225	-1.29902970	-0.83040766		95.00000000	0.36147368	-0.46956505	2.052202
96	0.64899647	-3.60996320	-2.34285337		96.00000000	0.35770833	-1.29131392	2.073633
97	0.65909874	-6.38413950	-4.20777830		97.00000000	0.35402062	-2.26011701	2.095125
98	0.66901869	-9.37397670	-6.27136561		98.00000000	0.35040816	-3.28471796	2.116515
99	0.67081612	-10.00051300	-6.70850533		99.00000000	0.34686869	-3.46886481	2.137867
100	0.67091811	-10.00019100	-6.70930925		100.00000000	0.34340000	-3.43406559	2.159241
101	0.67082208	-10.00005400	-6.70825702		101.00000000	0.34000000	-3.40001836	2.180722
01:55 03/04/2018
Test Lot:	JK-PERC
Recipe:	Recipe_YJX-LID
Cell Name:	1-0-11h
Test Order:	4
Test Condition:	Light
1	-0.29984719	8.63304230	-2.58859347		1.00000000	34.34000000	296.45867258	0.000000
2	-0.29001996	8.62785720	-2.50225080		2.00000000	17.17000000	148.14030812	0.061807
3	-0.27987120	8.62798790	-2.41472533		3.00000000	11.44666667	98.76170150	0.083233
4	-0.27005365	8.64048860	-2.33339548		4.00000000	8.58500000	74.17859463	0.104734
5	-0.25987065	8.62333680	-2.24095214		5.00000000	6.86800000	59.22507714	0.126123
6	-0.24974792	8.63492970	-2.15655573		6.00000000	5.72333333	49.42058098	0.147466
7	-0.23993185	8.62186150	-2.06865918		7.00000000	4.90571429	42.29638913	0.168844
8	-0.22975777	8.62360190	-1.98133954		8.00000000	4.29250000	37.01681116	0.190363
9	-0.21996702	8.62957480	-1.89822185		9.00000000	3.81555556	32.92662207	0.211747
10	-0.20982122	8.61853890	-1.80835235		10.00000000	3.43400000	29.59606258	0.233130
11	-0.19996646	8.64288140	-1.72828640		11.00000000	3.12181818	26.98150430	0.254503
12	-0.18981843	8.60774520	-1.63390868		12.00000000	2.86166667	24.63249751	0.275973
13	-0.18006638	8.63835910	-1.55547805		13.00000000	2.64153846	22.81855781	0.297353
14	-0.16990347	8.62511540	-1.46543704		14.00000000	2.45285714	21.15617592	0.318690
15	-0.16010006	8.63036250	-1.38172155		15.00000000	2.28933333	19.75777655	0.340065
16	-0.14992003	8.62511350	-1.29307727		16.00000000	2.14625000	18.51164985	0.361540
17	-0.13980326	8.63789650	-1.20760609		17.00000000	2.02000000	17.44855093	0.382912
18	-0.12998123	8.63158890	-1.12194454		18.00000000	1.90777778	16.46715349	0.404305
19	-0.11979972	8.64004990	-1.03507556		19.00000000	1.80736842	15.61575335	0.425672
20	-0.10999557	8.61160180	-0.94723805		20.00000000	1.71700000	14.78612029	0.447150
21	-0.09982074	8.63690570	-0.86214233		21.00000000	1.63523810	14.12339723	0.468540
22	-0.09002552	8.62659550	-0.77661376		22.00000000	1.56090909	13.46533134	0.489925
23	-0.07985144	8.64023020	-0.68993483		23.00000000	1.49304348	12.90023935	0.511285
24	-0.07003389	8.62913420	-0.60433186		24.00000000	1.43083333	12.34685285	0.532773
25	-0.05989331	8.62308310	-0.51646499		25.00000000	1.37360000	11.84466695	0.554145
26	-0.04972965	8.63571260	-0.42945099		26.00000000	1.32076923	11.40578349	0.575532
27	-0.03992550	8.62655260	-0.34441940		27.00000000	1.27185185	10.97169690	0.596994
28	-0.02975738	8.62655540	-0.25670364		28.00000000	1.22642857	10.57985402	0.618433
29	-0.01993982	8.62505340	-0.17198204		29.00000000	1.18413793	10.21325289	0.639817
30	-0.00982380	8.62607000	-0.08474080		30.00000000	1.14466667	9.87397479	0.661203
31	-0.00063520	8.62547110	-0.00547889		31.00000000	1.10774194	9.55479605	0.682666
32	0.00949625	8.62220000	0.08187853		32.00000000	1.07312500	9.25269838	0.704163
33	0.01930012	8.61403470	0.16625189		33.00000000	1.04060606	8.96381672	0.725538
34	0.02941213	8.63063430	0.25384534		34.00000000	1.01000000	8.71694064	0.746908
35	0.03925024	8.62087540	0.33837145		35.00000000	0.98114286	8.45831032	0.768266
36	0.04942924	8.62671760	0.42641211		36.00000000	0.95388889	8.22893007	0.789741
37	0.05922865	8.61941150	0.51051609		37.00000000	0.92810811	7.99974570	0.811130
38	0.06939053	8.63177590	0.59896349		38.00000000	0.90368421	7.80039959	0.832515
39	0.07951222	8.62819960	0.68604727		39.00000000	0.88051282	7.59724037	0.853864
40	0.08937563	8.62017730	0.77043378		40.00000000	0.85850000	7.40042221	0.875344
41	0.09949360	8.63128850	0.85875797		41.00000000	0.83756098	7.22923042	0.896715
42	0.10931683	8.62677760	0.94305198		42.00000000	0.81761905	7.05341769	0.918084
43	0.11948168	8.61850550	1.02975352		43.00000000	0.79860465	6.88277858	0.939579
44	0.12926769	8.61991410	1.11427638		44.00000000	0.78045455	6.72745114	0.960944
45	0.13941023	8.64181330	1.20475718		45.00000000	0.76311111	6.59466375	0.982290
46	0.14926396	8.63526340	1.28893361		46.00000000	0.74652174	6.44641185	1.003673
47	0.15937820	8.63311100	1.37592969		47.00000000	0.73063830	6.30768153	1.025157
48	0.16958028	8.62304970	1.46229918		48.00000000	0.71541667	6.16907347	1.046537
49	0.17930675	8.62820240	1.54709493		49.00000000	0.70081633	6.04678511	1.067891
50	0.18954529	8.62611200	1.63503890		50.00000000	0.68680000	5.92441372	1.089267
51	0.19933873	8.61632920	1.71756812		51.00000000	0.67333333	5.80166166	1.110749
52	0.20945597	8.62226680	1.80598526		52.00000000	0.66038462	5.69401234	1.132120
53	0.21929109	8.62200830	1.89072960		53.00000000	0.64792453	5.58641066	1.153466
54	0.22942470	8.63055230	1.98006187		54.00000000	0.63592593	5.48839196	1.174837
55	0.23925833	8.62932780	2.06463856		55.00000000	0.62436364	5.38783848	1.196331
56	0.24941427	8.62817570	2.15199014		56.00000000	0.61321429	5.29092060	1.217707
57	0.25954115	8.62219140	2.23781347		57.00000000	0.60245614	5.19449215	1.239070
58	0.26937631	8.62754540	2.32405634		58.00000000	0.59206897	5.10810188	1.260449
59	0.27949053	8.62118240	2.40953884		59.00000000	0.58203390	5.01782040	1.281926
60	0.28934801	8.61910920	2.49392209		60.00000000	0.57233333	4.93300350	1.303309
61	0.29948831	8.62541100	2.58320976		61.00000000	0.56295082	4.85568219	1.324661
62	0.30931005	8.62025260	2.66633076		62.00000000	0.55387097	4.77450765	1.346031
63	0.31949425	8.62268070	2.75489690		63.00000000	0.54507937	4.70004532	1.367510
64	0.32925048	8.62070180	2.83837021		64.00000000	0.53656250	4.62554531	1.388882
65	0.33941683	8.62419610	2.92719730		65.00000000	0.52830769	4.55622914	1.410258
66	0.34923634	8.61216930	3.00768249		66.00000000	0.52030303	4.48093778	1.431623
67	0.35935059	8.62064460	3.09783372		67.00000000	0.51253731	4.41840202	1.453090
68	0.36954299	8.61603360	3.18399482		68.00000000	0.50500000	4.35109697	1.474478
69	0.37935057	8.61793990	3.26922041		69.00000000	0.49768116	4.28898632	1.495872
70	0.38952658	8.61332510	3.35511907		70.00000000	0.49057143	4.22545120	1.517212
71	0.39930442	8.60747430	3.43700253		71.00000000	0.48366197	4.16310799	1.538681
72	0.40947300	8.61480240	3.52752898		72.00000000	0.47694444	4.10878214	1.560042
73	0.41933417	8.61143490	3.61106891		73.00000000	0.47041096	4.05091335	1.581414
74	0.42941344	8.59101490	3.68909726		74.00000000	0.46405405	3.98669529	1.602898
75	0.43926197	8.59458160	3.77527284		75.00000000	0.45786667	3.93517243	1.624287
76	0.44938216	8.58241750	3.85678531		76.00000000	0.45184211	3.87789759	1.645630
77	0.45955223	8.59260560	3.94875106		77.00000000	0.44597403	3.83207891	1.667014
78	0.46941492	8.56205650	4.01915707		78.00000000	0.44025641	3.76950026	1.688498
79	0.47956264	8.55562970	4.10296037		79.00000000	0.43468354	3.71899144	1.709882
80	0.48939928	8.52830980	4.17374868		80.00000000	0.42925000	3.66077698	1.731226
81	0.49949789	8.46591850	4.22870843		81.00000000	0.42395062	3.58913137	1.752600
82	0.50935686	8.44488620	4.30146072		82.00000000	0.41878049	3.53655356	1.774083
83	0.51947701	8.36431500	4.34506935		83.00000000	0.41373494	3.46060936	1.795459
84	0.52922958	8.23368260	4.35750838		84.00000000	0.40880952	3.36600786	1.816807
85	0.53941077	8.13728810	4.38934084		85.00000000	0.40400000	3.28746439	1.838192
86	0.54949081	7.91238020	4.34778021		86.00000000	0.39930233	3.15943181	1.859666
87	0.55932742	7.62758060	4.26631498		87.00000000	0.39471264	3.01070250	1.881034
88	0.56945950	7.23974850	4.12274356		88.00000000	0.39022727	2.82514731	1.902393
89	0.57921499	6.72187950	3.89341337		89.00000000	0.38584270	2.59358811	1.923773
90	0.58932406	6.01459690	3.54454666		90.00000000	0.38155556	2.29490286	1.945254
91	0.59917033	5.11237480	3.06318330		91.00000000	0.37736264	1.92921924	1.966643
92	0.60928088	3.93634200	2.39833792		92.00000000	0.37326087	1.46928244	1.988107
93	0.61907655	2.53496930	1.56934005		93.00000000	0.36924731	0.93603060	2.009507
94	0.62912756	0.76487684	0.48120510		94.00000000	0.36531915	0.27942416	2.030993
95	0.63920534	-1.30901920	-0.83673206		95.00000000	0.36147368	-0.47317599	2.052367
96	0.64891613	-3.63881160	-2.36128354		96.00000000	0.35770833	-1.30163323	2.073733
97	0.65904748	-6.41125110	-4.22531888		97.00000000	0.35402062	-2.26971508	2.095093
98	0.66908211	-9.45674230	-6.32733709		98.00000000	0.35040816	-3.31371970	2.116572
99	0.67073298	-10.00032200	-6.70754578		99.00000000	0.34686869	-3.46879856	2.137955
100	0.67071509	-10.00044000	-6.70744601		100.00000000	0.34340000	-3.43415110	2.159344
101	0.67059600	-10.00042400	-6.70624433		101.00000000	0.34000000	-3.40014416	2.180707
