# Supplementary material for: Study on the Electrical Injection Regeneration of Industrialized B-Doped Czochralski Silicon PERC Solar Cells
Source: Hindawi journal article supplement (doi:10.1155/2019/5357370), 2019-06-20
Supplement: f1 [file 5357370.f1.zip › section3.1/IVRawData_1-0-12h.csv]

02:53 03/04/2018
Test Lot:	JK-PERC
Recipe:	Recipe_YJX-LID
Cell Name:	1-0-12h
Test Order:	2
Test Condition:	Light
1	-0.29978946	8.62222000	-2.58485068		1.00000000	34.34000000	296.08703480	0.000000
2	-0.29002038	8.62333300	-2.50094231		2.00000000	17.17000000	148.06262761	0.061792
3	-0.27988136	8.62326620	-2.41349147		3.00000000	11.44666667	98.70765377	0.083219
4	-0.27003488	8.62797360	-2.32985382		4.00000000	8.58500000	74.07115336	0.104718
5	-0.25986311	8.63171860	-2.24306524		5.00000000	6.86800000	59.28264334	0.126108
6	-0.24971147	8.62108990	-2.15278503		6.00000000	5.72333333	49.34137119	0.147462
7	-0.23989475	8.62014680	-2.06792796		7.00000000	4.90571429	42.28797730	0.168835
8	-0.22976318	8.61099720	-1.97849010		8.00000000	4.29250000	36.96270548	0.190312
9	-0.21989064	8.62171750	-1.89583498		9.00000000	3.81555556	32.89664211	0.211700
10	-0.20977247	8.61834620	-1.80789177		10.00000000	3.43400000	29.59540085	0.233109
11	-0.19996320	8.62505530	-1.72469366		11.00000000	3.12181818	26.92585445	0.254532
12	-0.18980856	8.62538910	-1.63717268		12.00000000	2.86166667	24.68298847	0.276026
13	-0.18000673	8.62728310	-1.55296902		13.00000000	2.64153846	22.78930013	0.297390
14	-0.16987889	8.61107730	-1.46284025		14.00000000	2.45285714	21.12174246	0.318750
15	-0.16006885	8.63598730	-1.38235256		15.00000000	2.28933333	19.77065359	0.340123
16	-0.14988594	8.62189290	-1.29230052		16.00000000	2.14625000	18.50473764	0.361602
17	-0.13975884	8.62444400	-1.20534229		17.00000000	2.02000000	17.42137688	0.382988
18	-0.12996297	8.60607530	-1.11847111		18.00000000	1.90777778	16.41847921	0.404345
19	-0.11979642	8.63436220	-1.03436568		19.00000000	1.80736842	15.60547358	0.425708
20	-0.11001393	8.62593650	-0.94897317		20.00000000	1.71700000	14.81073297	0.447185
21	-0.09982580	8.62608150	-0.86110548		21.00000000	1.63523810	14.10569708	0.468582
22	-0.09000611	8.61888030	-0.77575185		22.00000000	1.56090909	13.45328861	0.489967
23	-0.07989240	8.62460140	-0.68904014		23.00000000	1.49304348	12.87690487	0.511311
24	-0.07004666	8.62004380	-0.60380524		24.00000000	1.43083333	12.33384600	0.532785
25	-0.05989648	8.63077740	-0.51695322		25.00000000	1.37360000	11.85523584	0.554170
26	-0.04975748	8.62211990	-0.42901493		26.00000000	1.32076923	11.38783067	0.575583
27	-0.03994076	8.63809010	-0.34501188		27.00000000	1.27185185	10.98637089	0.597068
28	-0.02979803	8.61156080	-0.25660756		28.00000000	1.22642857	10.56146421	0.618462
29	-0.01997759	8.62344650	-0.17227566		29.00000000	1.18413793	10.21135010	0.639807
30	-0.00984007	8.61947820	-0.08481627		30.00000000	1.14466667	9.86642938	0.661172
31	-0.00062252	8.61306480	-0.00536182		31.00000000	1.10774194	9.54105307	0.682781
32	0.00949172	8.62745000	0.08188930		32.00000000	1.07312500	9.25833228	0.704172
33	0.01930518	8.62388990	0.16648574		33.00000000	1.04060606	8.97407210	0.725524
34	0.02947292	8.61824800	0.25400496		34.00000000	1.01000000	8.70443048	0.746897
35	0.03926629	8.61694150	0.33835534		35.00000000	0.98114286	8.45445060	0.768380
36	0.04945934	8.61958790	0.42631915		36.00000000	0.95388889	8.22212912	0.789767
37	0.05925420	8.63635440	0.51174024		37.00000000	0.92810811	8.01547054	0.811109
38	0.06939664	8.61243530	0.59767405		38.00000000	0.90368421	7.78292179	0.832487
39	0.07957406	8.63890270	0.68743253		39.00000000	0.88051282	7.60666458	0.853960
40	0.08938231	8.61918260	0.77040248		40.00000000	0.85850000	7.39956826	0.875333
41	0.09951433	8.62291240	0.85810333		41.00000000	0.83756098	7.22221492	0.896683
42	0.10931216	8.62177280	0.94246461		42.00000000	0.81761905	7.04932567	0.918058
43	0.11947991	8.61816120	1.02969712		43.00000000	0.79860465	6.88250362	0.939544
44	0.12933952	8.62626840	1.11571741		44.00000000	0.78045455	6.73241038	0.960933
45	0.13945664	8.62217330	1.20241932		45.00000000	0.76311111	6.57967625	0.982297
46	0.14929095	8.62761310	1.28802456		46.00000000	0.74652174	6.44070074	1.003682
47	0.15945348	8.61822800	1.37420645		47.00000000	0.73063830	6.29680744	1.025206
48	0.16958626	8.61819460	1.46152739		48.00000000	0.71541667	6.16560005	1.046595
49	0.17939524	8.62241650	1.54682048		49.00000000	0.70081633	6.04273026	1.067955
50	0.18952504	8.62633710	1.63490688		50.00000000	0.68680000	5.92456832	1.089321
51	0.19934371	8.61674120	1.71769316		51.00000000	0.67333333	5.80193907	1.110799
52	0.20946382	8.61501690	1.80453435		52.00000000	0.66038462	5.68922462	1.132170
53	0.21930481	8.60572050	1.88727590		53.00000000	0.64792453	5.57585740	1.153557
54	0.22940782	8.62238500	1.97804255		54.00000000	0.63592593	5.48319816	1.174899
55	0.23921011	8.61931420	2.06182710		55.00000000	0.62436364	5.38158636	1.196369
56	0.24938753	8.62366960	2.15063566		56.00000000	0.61321429	5.28815739	1.217765
57	0.25954187	8.61777400	2.23667318		57.00000000	0.60245614	5.19183086	1.239145
58	0.26936278	8.61425300	2.32035914		58.00000000	0.59206897	5.10023186	1.260636
59	0.27949032	8.62615300	2.41092626		59.00000000	0.58203390	5.02071346	1.282032
60	0.28932688	8.62046720	2.49413288		60.00000000	0.57233333	4.93378073	1.303377
61	0.29949313	8.60567000	2.57733904		61.00000000	0.56295082	4.84456898	1.324747
62	0.30930734	8.62455750	2.66763894		62.00000000	0.55387097	4.77689201	1.346225
63	0.31946093	8.60890290	2.75020813		63.00000000	0.54507937	4.69253533	1.367600
64	0.32925281	8.62451080	2.83964442		64.00000000	0.53656250	4.62758908	1.388962
65	0.33941165	8.61114880	2.92272422		65.00000000	0.52830769	4.54933615	1.410332
66	0.34924743	8.61811640	3.00985500		66.00000000	0.52030303	4.48403208	1.431820
67	0.35937870	8.60086060	3.09096610		67.00000000	0.51253731	4.40826199	1.453210
68	0.36955017	8.62135510	3.18602324		68.00000000	0.50500000	4.35378433	1.474565
69	0.37939265	8.61132050	3.26707170		69.00000000	0.49768116	4.28569197	1.495935
70	0.38950607	8.60826020	3.35296960		70.00000000	0.49057143	4.22296650	1.517419
71	0.39929795	8.60360240	3.43540080		71.00000000	0.48366197	4.16123530	1.538796
72	0.40947461	8.59591770	3.51981005		72.00000000	0.47694444	4.09977519	1.560143
73	0.41933721	8.60097410	3.60670848		73.00000000	0.47041096	4.04599247	1.581537
74	0.42944989	8.60538960	3.69558362		74.00000000	0.46405405	3.99336593	1.603009
75	0.43929312	8.58749870	3.77242910		75.00000000	0.45786667	3.93192940	1.624378
76	0.44942513	8.58685590	3.85914883		76.00000000	0.45184211	3.87990305	1.645740
77	0.45956534	8.56305890	3.93528507		77.00000000	0.44597403	3.81890185	1.667125
78	0.46941751	8.57036500	4.02307940		78.00000000	0.44025641	3.77315813	1.688603
79	0.47960013	8.52885440	4.09043968		79.00000000	0.43468354	3.70735266	1.709991
80	0.48936448	8.51642320	4.16763501		80.00000000	0.42925000	3.65567466	1.731353
81	0.49951732	8.46466350	4.22824603		81.00000000	0.42395062	3.58859932	1.752730
82	0.50933450	8.43296240	4.29519869		82.00000000	0.41878049	3.53156011	1.774216
83	0.51946056	8.34475420	4.33477069		83.00000000	0.41373494	3.45251638	1.795597
84	0.52924275	8.23906800	4.36046701		84.00000000	0.40880952	3.36820947	1.816978
85	0.53939342	8.08995250	4.36366715		85.00000000	0.40400000	3.26834081	1.838342
86	0.54949117	7.87146760	4.32530194		86.00000000	0.39930233	3.14309532	1.859826
87	0.55929649	7.59676600	4.24884456		87.00000000	0.39471264	2.99853959	1.881205
88	0.56943595	7.18489690	4.09133859		88.00000000	0.39022727	2.80374272	1.902587
89	0.57928216	6.64687200	3.85041437		89.00000000	0.38584270	2.56464702	1.924064
90	0.58934867	5.93088720	3.49536048		90.00000000	0.38155556	2.26296296	1.945439
91	0.59912270	5.03079840	3.01406552		91.00000000	0.37736264	1.89843535	1.966802
92	0.60924578	3.84302260	2.34134530		92.00000000	0.37326087	1.43444996	1.988261
93	0.61903167	2.44505830	1.51356852		93.00000000	0.36924731	0.90283120	2.009771
94	0.62910414	0.72310966	0.45491128		94.00000000	0.36531915	0.26416581	2.031143
95	0.63925254	-1.31845710	-0.84282705		95.00000000	0.36147368	-0.47658755	2.052506
96	0.64892685	-3.55682370	-2.30811840		96.00000000	0.35770833	-1.27230548	2.073895
97	0.65908712	-6.21006870	-4.09297629		97.00000000	0.35402062	-2.19849236	2.095384
98	0.66900706	-9.10309890	-6.09003743		98.00000000	0.35040816	-3.18980017	2.116770
99	0.67190826	-10.00039100	-6.71934532		99.00000000	0.34686869	-3.46882249	2.138110
100	0.67186809	-10.00025500	-6.71885223		100.00000000	0.34340000	-3.43408757	2.159486
101	0.67185843	-10.00028100	-6.71877309		101.00000000	0.34000000	-3.40009554	2.180968
02:53 03/04/2018
Test Lot:	JK-PERC
Recipe:	Recipe_YJX-LID
Cell Name:	1-0-12h
Test Order:	3
Test Condition:	Light
1	-0.29987550	8.62056350	-2.58509579		1.00000000	34.34000000	296.03015059	0.000000
2	-0.28999460	8.63258170	-2.50340208		2.00000000	17.17000000	148.22142779	0.061763
3	-0.27984872	8.62800120	-2.41453509		3.00000000	11.44666667	98.76185374	0.083183
4	-0.27005419	8.60532860	-2.32390504		4.00000000	8.58500000	73.87674603	0.104678
5	-0.25984877	8.63794900	-2.24456042		5.00000000	6.86800000	59.32543373	0.126045
6	-0.24979594	8.61245440	-2.15135614		6.00000000	5.72333333	49.29194735	0.147402
7	-0.23995376	8.62035470	-2.06848652		7.00000000	4.90571429	42.28899720	0.168771
8	-0.22978629	8.63386060	-1.98394280		8.00000000	4.29250000	37.06084663	0.190242
9	-0.21997017	8.62287810	-1.89677596		9.00000000	3.81555556	32.90107044	0.211626
10	-0.20988756	8.61909480	-1.80904078		10.00000000	3.43400000	29.59797154	0.233008
11	-0.19999476	8.61629770	-1.72321439		11.00000000	3.12181818	26.89851482	0.254414
12	-0.18990843	8.62162970	-1.63732016		12.00000000	2.86166667	24.67223032	0.275910
13	-0.18003276	8.62006760	-1.55189456		13.00000000	2.64153846	22.77024011	0.297297
14	-0.16994420	8.62091350	-1.46507425		14.00000000	2.45285714	21.14586926	0.318688
15	-0.16013476	8.61147980	-1.37899725		15.00000000	2.28933333	19.71454776	0.340091
16	-0.15000527	8.62851330	-1.29432247		16.00000000	2.14625000	18.51894667	0.361565
17	-0.13986610	8.60686110	-1.20380810		17.00000000	2.02000000	17.38585942	0.382957
18	-0.13004996	8.62692170	-1.12193082		18.00000000	1.90777778	16.45824951	0.404347
19	-0.11984901	8.61190700	-1.03212853		19.00000000	1.80736842	15.56488876	0.425706
20	-0.11006935	8.62110420	-0.94891934		20.00000000	1.71700000	14.80243591	0.447180
21	-0.09986319	8.60835460	-0.85965772		21.00000000	1.63523810	14.07670938	0.468563
22	-0.09001058	8.61543850	-0.77548058		22.00000000	1.56090909	13.44791628	0.489940
23	-0.07990044	8.62487890	-0.68913158		23.00000000	1.49304348	12.87731919	0.511318
24	-0.07005899	8.61753750	-0.60373601		24.00000000	1.43083333	12.33025991	0.532796
25	-0.05992578	8.61920170	-0.51651235		25.00000000	1.37360000	11.83933546	0.554164
26	-0.04982606	8.61765480	-0.42938375		26.00000000	1.32076923	11.38193330	0.575562
27	-0.03991241	8.61001680	-0.34364656		27.00000000	1.27185185	10.95066581	0.596909
28	-0.02980302	8.62576290	-0.25707374		28.00000000	1.22642857	10.57888207	0.618380
29	-0.01996009	8.61668300	-0.17198973		29.00000000	1.18413793	10.20334118	0.639745
30	-0.00984920	8.62012100	-0.08490128		30.00000000	1.14466667	9.86716517	0.661130
31	-0.00065383	8.61610790	-0.00563346		31.00000000	1.10774194	9.54442404	0.682739
32	0.00953426	8.61225130	0.08211144		32.00000000	1.07312500	9.24202218	0.704112
33	0.01930769	8.62588020	0.16654582		33.00000000	1.04060606	8.97614321	0.725469
34	0.02948304	8.61520480	0.25400245		34.00000000	1.01000000	8.70135685	0.746847
35	0.03927061	8.62406250	0.33867222		35.00000000	0.98114286	8.46143732	0.768322
36	0.04940801	8.61944870	0.42586978		36.00000000	0.95388889	8.22199634	0.789701
37	0.05925587	8.61396790	0.51042814		37.00000000	0.92810811	7.99469345	0.811054
38	0.06937168	8.62297150	0.59819000		38.00000000	0.90368421	7.79244319	0.832430
39	0.07954034	8.61009500	0.68484984		39.00000000	0.88051282	7.58129903	0.853901
40	0.08931004	8.63035770	0.77077762		40.00000000	0.85850000	7.40916209	0.875321
41	0.09953005	8.60991480	0.85694524		41.00000000	0.83756098	7.21132864	0.896670
42	0.10925584	8.61916830	0.94169447		42.00000000	0.81761905	7.04719618	0.918042
43	0.11943194	8.61227800	1.02858107		43.00000000	0.79860465	6.87780527	0.939519
44	0.12926194	8.61542510	1.11364656		44.00000000	0.78045455	6.72394768	0.960890
45	0.13943729	8.62192820	1.20221830		45.00000000	0.76311111	6.57948921	0.982253
46	0.14925314	8.61022190	1.28510265		46.00000000	0.74652174	6.42771783	1.003633
47	0.15941139	8.61677650	1.37361232		47.00000000	0.73063830	6.29574692	1.025108
48	0.16958301	8.61779500	1.46143162		48.00000000	0.71541667	6.16531417	1.046492
49	0.17932890	8.60582450	1.54327304		49.00000000	0.70081633	6.03110231	1.067845
50	0.18948491	8.62912270	1.63508854		50.00000000	0.68680000	5.92648147	1.089217
51	0.19927248	8.62172790	1.71807310		51.00000000	0.67333333	5.80529679	1.110690
52	0.20942847	8.61408330	1.80403429		52.00000000	0.66038462	5.68860809	1.132063
53	0.21924210	8.61403660	1.88855947		53.00000000	0.64792453	5.58124560	1.153426
54	0.22940034	8.61762810	1.97688682		54.00000000	0.63592593	5.48017313	1.174787
55	0.23920800	8.61282830	2.06025743		55.00000000	0.62436364	5.37753680	1.196277
56	0.24938187	8.63108160	2.15243527		56.00000000	0.61321429	5.29270254	1.217661
57	0.25957656	8.62502570	2.23885450		57.00000000	0.60245614	5.19619969	1.239047
58	0.26938424	8.61452200	2.32061646		58.00000000	0.59206897	5.10039113	1.260387
59	0.27954844	8.61383440	2.40798397		59.00000000	0.58203390	5.01354362	1.281849
60	0.28929654	8.62176800	2.49424765		60.00000000	0.57233333	4.93452522	1.303220
61	0.29951581	8.60744480	2.57806580		61.00000000	0.56295082	4.84556811	1.324607
62	0.30925500	8.62398620	2.66701085		62.00000000	0.55387097	4.77657558	1.346075
63	0.31938571	8.61166380	2.75044236		63.00000000	0.54507937	4.69404024	1.367462
64	0.32929459	8.60879990	2.83483123		64.00000000	0.53656250	4.61915920	1.388811
65	0.33937395	8.60709100	2.92102247		65.00000000	0.52830769	4.54719238	1.410197
66	0.34927613	8.61182210	3.00790390		66.00000000	0.52030303	4.48075714	1.431680
67	0.35936812	8.61046030	3.09432493		67.00000000	0.51253731	4.41318219	1.453061
68	0.36956283	8.60964970	3.18180651		68.00000000	0.50500000	4.34787310	1.474449
69	0.37941217	8.60233020	3.26382877		69.00000000	0.49768116	4.28121767	1.495837
70	0.38950863	8.61695860	3.35637974		70.00000000	0.49057143	4.22723369	1.517371
71	0.39933789	8.58267310	3.42738657		71.00000000	0.48366197	4.15111260	1.538743
72	0.40945369	8.60827260	3.52468898		72.00000000	0.47694444	4.10566779	1.560083
73	0.41931942	8.59659580	3.60471956		73.00000000	0.47041096	4.04393287	1.581468
74	0.42941365	8.59486870	3.69075394		74.00000000	0.46405405	3.98848366	1.602937
75	0.43927565	8.58987240	3.77332178		75.00000000	0.45786667	3.93301624	1.624308
76	0.44943017	8.58197400	3.85699803		76.00000000	0.45184211	3.87769720	1.645659
77	0.45958170	8.56721500	3.93733523		77.00000000	0.44597403	3.82075536	1.667027
78	0.46947867	8.54870320	4.01343381		78.00000000	0.44025641	3.76362138	1.688508
79	0.47953346	8.54013060	4.09527838		79.00000000	0.43468354	3.71225424	1.709890
80	0.48928678	8.51073170	4.16418851		80.00000000	0.42925000	3.65323158	1.731242
81	0.49951574	8.46846390	4.23013101		81.00000000	0.42395062	3.59021050	1.752629
82	0.50928098	8.42527580	4.29083272		82.00000000	0.41878049	3.52834111	1.774110
83	0.51940495	8.35351280	4.33885590		83.00000000	0.41373494	3.45614012	1.795494
84	0.52926546	8.24992560	4.36640067		84.00000000	0.40880952	3.37264816	1.816843
85	0.53941178	8.10153580	4.37006385		85.00000000	0.40400000	3.27302046	1.838206
86	0.54950154	7.90202140	4.34217293		86.00000000	0.39930233	3.15529552	1.859684
87	0.55927277	7.60640190	4.25405346		87.00000000	0.39471264	3.00234300	1.881075
88	0.56944144	7.21214290	4.10689304		88.00000000	0.39022727	2.81437485	1.902458
89	0.57922006	6.68342920	3.87117626		89.00000000	0.38584270	2.57875235	1.923793
90	0.58937305	5.97019000	3.51866909		90.00000000	0.38155556	2.27795916	1.945266
91	0.59916365	5.06479220	3.03463938		91.00000000	0.37736264	1.91126334	1.966638
92	0.60925412	3.89602420	2.37366880		92.00000000	0.37326087	1.45423338	1.988129
93	0.61907667	2.46682860	1.52715604		93.00000000	0.36924731	0.91086983	2.009651
94	0.62904286	0.73155850	0.46018165		94.00000000	0.36531915	0.26725233	2.031028
95	0.63922125	-1.34477670	-0.85960984		95.00000000	0.36147368	-0.48610139	2.052372
96	0.64893883	-3.64441060	-2.36499955		96.00000000	0.35770833	-1.30363604	2.073755
97	0.65906060	-6.37262440	-4.19994566		97.00000000	0.35402062	-2.25604043	2.095228
98	0.66908860	-9.37809940	-6.27477940		98.00000000	0.35040816	-3.28616259	2.116624
99	0.67092997	-10.00048200	-6.70962309		99.00000000	0.34686869	-3.46885406	2.137970
100	0.67089945	-10.00037100	-6.70924340		100.00000000	0.34340000	-3.43412740	2.159347
101	0.67093521	-10.00024400	-6.70951581		101.00000000	0.34000000	-3.40008296	2.180833
02:54 03/04/2018
Test Lot:	JK-PERC
Recipe:	Recipe_YJX-LID
Cell Name:	1-0-12h
Test Order:	4
Test Condition:	Light
1	-0.29984584	8.62106420	-2.58499024		1.00000000	34.34000000	296.04734463	0.000000
2	-0.28997681	8.63490010	-2.50392079		2.00000000	17.17000000	148.26123472	0.061724
3	-0.27984950	8.60371880	-2.40774640		3.00000000	11.44666667	98.48390120	0.083172
4	-0.27007127	8.63290310	-2.33149910		4.00000000	8.58500000	74.11347311	0.104635
5	-0.25986132	8.60500910	-2.23610902		5.00000000	6.86800000	59.09920250	0.126065
6	-0.24969085	8.62776950	-2.15427510		6.00000000	5.72333333	49.37960077	0.147458
7	-0.23991038	8.62206750	-2.06852349		7.00000000	4.90571429	42.29739971	0.168993
8	-0.22973765	8.61712460	-1.97967796		8.00000000	4.29250000	36.98900735	0.190396
9	-0.21985671	8.62849710	-1.89703298		9.00000000	3.81555556	32.92251005	0.211752
10	-0.20975173	8.61958410	-1.80797268		10.00000000	3.43400000	29.59965180	0.233133
11	-0.19990130	8.62037370	-1.72322391		11.00000000	3.12181818	26.91123935	0.254598
12	-0.18982014	8.62551020	-1.63729555		12.00000000	2.86166667	24.68333502	0.275969
13	-0.18000247	8.60459520	-1.54884839		13.00000000	2.64153846	22.72936917	0.297317
14	-0.16987813	8.63187120	-1.46636614		14.00000000	2.45285714	21.17274693	0.318686
15	-0.16003737	8.61433410	-1.37861537		15.00000000	2.28933333	19.72108220	0.340158
16	-0.14993909	8.62885090	-1.29380205		16.00000000	2.14625000	18.51967124	0.361531
17	-0.13973734	8.62236790	-1.20486675		17.00000000	2.02000000	17.41718316	0.382882
18	-0.12989658	8.60983850	-1.11838858		18.00000000	1.90777778	16.42565856	0.404251
19	-0.11980574	8.63176820	-1.03413538		19.00000000	1.80736842	15.60078526	0.425726
20	-0.10999923	8.62370300	-0.94860069		20.00000000	1.71700000	14.80689805	0.447100
21	-0.09978855	8.62766740	-0.86094245		21.00000000	1.63523810	14.10829041	0.468455
22	-0.08998055	8.61091330	-0.77481471		22.00000000	1.56090909	13.44085285	0.489838
23	-0.07985175	8.63301470	-0.68936131		23.00000000	1.49304348	12.88946630	0.511311
24	-0.07008394	8.62498950	-0.60447324		24.00000000	1.43083333	12.34092248	0.532693
25	-0.05988145	8.61118320	-0.51565013		25.00000000	1.37360000	11.82832124	0.554035
26	-0.04976307	8.62198070	-0.42905619		26.00000000	1.32076923	11.38764682	0.575407
27	-0.03992678	8.62482930	-0.34436165		27.00000000	1.27185185	10.96950512	0.596890
28	-0.02976746	8.61422060	-0.25642344		28.00000000	1.22642857	10.56472626	0.618277
29	-0.01992522	8.62565330	-0.17186804		29.00000000	1.18413793	10.21396325	0.639637
30	-0.00979046	8.61710930	-0.08436547		30.00000000	1.14466667	9.86371778	0.661016
31	-0.00066054	8.61094950	-0.00568790		31.00000000	1.10774194	9.53870987	0.682599
32	0.00954174	8.61260700	0.08217926		32.00000000	1.07312500	9.24240389	0.703984
33	0.01935988	8.63051610	0.16708576		33.00000000	1.04060606	8.98096736	0.725372
34	0.02947798	8.62037370	0.25411117		34.00000000	1.01000000	8.70657744	0.746725
35	0.03931323	8.61752800	0.33878289		35.00000000	0.98114286	8.45502604	0.768189
36	0.04945143	8.62867740	0.42670043		36.00000000	0.95388889	8.23079950	0.789555
37	0.05930902	8.62231250	0.51138088		37.00000000	0.92810811	8.00243814	0.810933
38	0.06940032	8.62812140	0.59879437		38.00000000	0.90368421	7.79709708	0.832358
39	0.07961071	8.62431720	0.68658797		39.00000000	0.88051282	7.59382186	0.853827
40	0.08936930	8.62157820	0.77050444		40.00000000	0.85850000	7.40162488	0.875212
41	0.09956704	8.61662010	0.85793137		41.00000000	0.83756098	7.21694474	0.896584
42	0.10937178	8.62340740	0.94315742		42.00000000	0.81761905	7.05066215	0.917950
43	0.11955091	8.61647700	1.03010767		43.00000000	0.79860465	6.88115861	0.939429
44	0.12937278	8.62297530	1.11557829		44.00000000	0.78045455	6.72984027	0.960810
45	0.13952065	8.61899660	1.20252801		45.00000000	0.76311111	6.57725207	0.982177
46	0.14934102	8.61491680	1.28656046		46.00000000	0.74652174	6.43122267	1.003544
47	0.15950823	8.61414530	1.37402707		47.00000000	0.73063830	6.29382446	1.025014
48	0.16961218	8.62008000	1.46207056		48.00000000	0.71541667	6.16694890	1.046389
49	0.17941543	8.63333130	1.54895285		49.00000000	0.70081633	6.05037953	1.067782
50	0.18955661	8.59706020	1.62962959		50.00000000	0.68680000	5.90446095	1.089124
51	0.19933827	8.63405610	1.72109781		51.00000000	0.67333333	5.81359777	1.110591
52	0.20948391	8.61310100	1.80430607		52.00000000	0.66038462	5.68795939	1.131985
53	0.21930949	8.62635140	1.89184073		53.00000000	0.64792453	5.58922466	1.153366
54	0.22947001	8.62194060	1.97847680		54.00000000	0.63592593	5.48291556	1.174848
55	0.23923159	8.60962300	2.05969380		55.00000000	0.62436364	5.37553552	1.196235
56	0.24944645	8.62629410	2.15179844		56.00000000	0.61321429	5.28976677	1.217578
57	0.25956082	8.61257360	2.23548667		57.00000000	0.60245614	5.18869785	1.238952
58	0.26941693	8.61868950	2.32202087		58.00000000	0.59206897	5.10285858	1.260434
59	0.27950600	8.60734560	2.40580474		59.00000000	0.58203390	5.00976691	1.281805
60	0.28934124	8.61774160	2.49346804		60.00000000	0.57233333	4.93222078	1.303162
61	0.29945785	8.61254020	2.57909277		61.00000000	0.56295082	4.84843657	1.324545
62	0.30933329	8.61880020	2.66608182		62.00000000	0.55387097	4.77370321	1.346030
63	0.31950352	8.62065700	2.75433026		63.00000000	0.54507937	4.69894224	1.367422
64	0.32928741	8.60973830	2.83507843		64.00000000	0.53656250	4.61966271	1.388774
65	0.33946133	8.61325740	2.92386781		65.00000000	0.52830769	4.55045014	1.410148
66	0.34926385	8.61328600	3.00830943		66.00000000	0.52030303	4.48151881	1.431639
67	0.35942957	8.60238360	3.09195104		67.00000000	0.51253731	4.40904258	1.453003
68	0.36963847	8.60868550	3.18210134		68.00000000	0.50500000	4.34738618	1.474343
69	0.37943873	8.62393670	3.27225559		69.00000000	0.49768116	4.29197082	1.495718
70	0.38954717	8.59804340	3.34934347		70.00000000	0.49057143	4.21795443	1.517200
71	0.39937350	8.60450840	3.43641264		71.00000000	0.48366197	4.16167350	1.538586
72	0.40955633	8.59715750	3.52102027		72.00000000	0.47694444	4.10036651	1.559929
73	0.41936705	8.59473610	3.60434912		73.00000000	0.47041096	4.04305805	1.581293
74	0.42950746	8.59649660	3.69225942		74.00000000	0.46405405	3.98923910	1.602767
75	0.43933752	8.57979010	3.76942370		75.00000000	0.45786667	3.92839989	1.624155
76	0.44952333	8.58797070	3.86049319		76.00000000	0.45184211	3.88040676	1.645518
77	0.45959082	8.56577400	3.93675110		77.00000000	0.44597403	3.82011272	1.666898
78	0.46948859	8.55278110	4.01543314		78.00000000	0.44025641	3.76541670	1.688381
79	0.47956651	8.53090950	4.09113850		79.00000000	0.43468354	3.70824598	1.709760
80	0.48936677	8.52098180	4.16988534		80.00000000	0.42925000	3.65763144	1.731142
81	0.49957269	8.46413800	4.22845219		81.00000000	0.42395062	3.58837653	1.752483
82	0.50932384	8.44509220	4.30128679		82.00000000	0.41878049	3.53663983	1.773951
83	0.51949853	8.34917550	4.33738440		83.00000000	0.41373494	3.45434562	1.795343
84	0.52925193	8.25358010	4.36822320		84.00000000	0.40880952	3.37414215	1.816730
85	0.53943026	8.09527680	4.36683727		85.00000000	0.40400000	3.27049183	1.838204
86	0.54954541	7.89431670	4.33828551		86.00000000	0.39930233	3.15221902	1.859594
87	0.55930179	7.60856390	4.25548341		87.00000000	0.39471264	3.00319637	1.880947
88	0.56947643	7.20266820	4.10174977		88.00000000	0.39022727	2.81067757	1.902325
89	0.57936233	6.69035150	3.87613763		89.00000000	0.38584270	2.58142326	1.923809
90	0.58937097	5.96847150	3.51764384		90.00000000	0.38155556	2.27730346	1.945178
91	0.59913629	5.06841420	3.03667088		91.00000000	0.37736264	1.91263015	1.966534
92	0.60929906	3.88515470	2.36722111		92.00000000	0.37326087	1.45017622	1.988018
93	0.61908889	2.47720070	1.53360743		93.00000000	0.36924731	0.91469970	2.009513
94	0.62924194	0.72301185	0.45494938		94.00000000	0.36531915	0.26413007	2.030900
95	0.63924021	-1.36496150	-0.87253828		95.00000000	0.36147368	-0.49339766	2.052243
96	0.64905542	-3.64216380	-2.36396615		96.00000000	0.35770833	-1.30283234	2.073614
97	0.65906703	-6.40171000	-4.21915600		97.00000000	0.35402062	-2.26633733	2.095106
98	0.66909879	-9.39617820	-6.28697146		98.00000000	0.35040816	-3.29249754	2.116544
99	0.67088735	-10.00038300	-6.70913045		99.00000000	0.34686869	-3.46881972	2.137896
100	0.67089927	-10.00027000	-6.70917384		100.00000000	0.34340000	-3.43409272	2.159275
101	0.67086875	-10.00019000	-6.70881497		101.00000000	0.34000000	-3.40006460	2.180759
