# Supplementary material for: Study on the Electrical Injection Regeneration of Industrialized B-Doped Czochralski Silicon PERC Solar Cells
Source: Hindawi journal article supplement (doi:10.1155/2019/5357370), 2019-06-20
Supplement: f1 [file 5357370.f1.zip › section3.1/IVRawData_1-2-10h.csv]

00:52 03/04/2018
Test Lot:	JK-PERC
Recipe:	Recipe_YJX-LID
Cell Name:	1-2-10h
Test Order:	2
Test Condition:	Light
1	-0.29981488	8.79702470	-2.63747890		1.00000000	34.34000000	302.08982820	0.000000
2	-0.28997663	8.80141350	-2.55220423		2.00000000	17.17000000	151.12026980	0.061804
3	-0.27983171	8.79540540	-2.46123333		3.00000000	11.44666667	100.67807381	0.083226
4	-0.27002546	8.80424020	-2.37736901		4.00000000	8.58500000	75.58440212	0.104725
5	-0.25986791	8.78668980	-2.28337871		5.00000000	6.86800000	60.34698555	0.126115
6	-0.24970065	8.80897520	-2.19960683		6.00000000	5.72333333	50.41670139	0.147462
7	-0.23988323	8.79455090	-2.10966528		7.00000000	4.90571429	43.14355399	0.168887
8	-0.22973533	8.80690190	-2.02325651		8.00000000	4.29250000	37.80362641	0.190389
9	-0.21989037	8.79266360	-1.93342205		9.00000000	3.81555556	33.54889645	0.211783
10	-0.20973058	8.80528550	-1.84673763		10.00000000	3.43400000	30.23735041	0.233131
11	-0.19993176	8.78525450	-1.75645139		11.00000000	3.12181818	27.42596723	0.254513
12	-0.18976526	8.80752470	-1.67136221		12.00000000	2.86166667	25.20419985	0.275997
13	-0.17999995	8.78483010	-1.58126898		13.00000000	2.64153846	23.20546659	0.297369
14	-0.16988927	8.80491450	-1.49586050		14.00000000	2.45285714	21.59719742	0.318731
15	-0.16002645	8.79354860	-1.40720037		15.00000000	2.28933333	20.13136393	0.340086
16	-0.14989567	8.79435920	-1.31823636		16.00000000	2.14625000	18.87489343	0.361556
17	-0.13973215	8.80057050	-1.22972264		17.00000000	2.02000000	17.77715241	0.382928
18	-0.12992962	8.79273890	-1.14243722		18.00000000	1.90777778	16.77459188	0.404313
19	-0.11978917	8.79379560	-1.05340148		19.00000000	1.80736842	15.89362847	0.425665
20	-0.10999184	8.81696510	-0.96979421		20.00000000	1.71700000	15.13872908	0.447132
21	-0.09981789	8.77102760	-0.87550550		21.00000000	1.63523810	14.34271847	0.468511
22	-0.09000792	8.80178740	-0.79223061		22.00000000	1.56090909	13.73878997	0.489908
23	-0.07989129	8.80548380	-0.70348143		23.00000000	1.49304348	13.14697016	0.511383
24	-0.07005228	8.78572850	-0.61546032		24.00000000	1.43083333	12.57091320	0.532752
25	-0.05989770	8.81727700	-0.52813457		25.00000000	1.37360000	12.11141169	0.554111
26	-0.04976320	8.79238510	-0.43753721		26.00000000	1.32076923	11.61271171	0.575488
27	-0.03987507	8.80305190	-0.35102229		27.00000000	1.27185185	11.19617786	0.597021
28	-0.02977928	8.80175400	-0.26210988		28.00000000	1.22642857	10.79472258	0.618405
29	-0.01996409	8.78766060	-0.17543766		29.00000000	1.18413793	10.40580224	0.639755
30	-0.00984523	8.78735350	-0.08651348		30.00000000	1.14466667	10.05859064	0.661131
31	-0.00064484	8.79644200	-0.00567228		31.00000000	1.10774194	9.74418769	0.682717
32	0.00951699	8.81232930	0.08386683		32.00000000	1.07312500	9.45673088	0.704099
33	0.01932445	8.79436590	0.16994632		33.00000000	1.04060606	9.15147045	0.725461
34	0.02949438	8.78912070	0.25922970		34.00000000	1.01000000	8.87701191	0.746843
35	0.03934427	8.80449100	0.34640631		35.00000000	0.98114286	8.63846346	0.768329
36	0.04947550	8.77382470	0.43408938		36.00000000	0.95388889	8.36925389	0.789715
37	0.05919440	8.79838940	0.52081536		37.00000000	0.92810811	8.16585654	0.811063
38	0.06939187	8.79897500	0.61057732		38.00000000	0.90368421	7.95149478	0.832435
39	0.07955063	8.78920270	0.69918662		39.00000000	0.88051282	7.73900566	0.853907
40	0.08943030	8.79897880	0.78689527		40.00000000	0.85850000	7.55392330	0.875284
41	0.09951612	8.78722190	0.87447026		41.00000000	0.83756098	7.35983415	0.896632
42	0.10936154	8.80409050	0.96282890		42.00000000	0.81761905	7.19839209	0.918013
43	0.11948831	8.78626540	1.04985600		43.00000000	0.79860465	7.01675241	0.939498
44	0.12936351	8.80427070	1.13895136		44.00000000	0.78045455	6.87133309	0.960879
45	0.13946123	8.79251860	1.22621546		45.00000000	0.76311111	6.70966864	0.982229
46	0.14925754	8.79741860	1.31308106		46.00000000	0.74652174	6.56746423	1.003596
47	0.15941110	8.79506020	1.40203022		47.00000000	0.73063830	6.42600781	1.025061
48	0.16959889	8.79944900	1.49237678		48.00000000	0.71541667	6.29527247	1.046428
49	0.17942570	8.79356860	1.57779220		49.00000000	0.70081633	6.16267644	1.067805
50	0.18964773	8.79614160	1.66816829		50.00000000	0.68680000	6.04119005	1.089153
51	0.19936663	8.77680970	1.74980297		51.00000000	0.67333333	5.90971853	1.110628
52	0.20949414	8.80363660	1.84431028		52.00000000	0.66038462	5.81378617	1.132000
53	0.21928598	8.79193590	1.92794828		53.00000000	0.64792453	5.69651092	1.153398
54	0.22945963	8.79160590	2.01731864		54.00000000	0.63592593	5.59081012	1.174876
55	0.23930356	8.78948310	2.10335460		55.00000000	0.62436364	5.48783363	1.196256
56	0.24940577	8.79178910	2.19272293		56.00000000	0.61321429	5.39125067	1.217622
57	0.25952807	8.79459950	2.28244543		57.00000000	0.60245614	5.29836047	1.238992
58	0.26935712	8.79940220	2.37018163		58.00000000	0.59206897	5.20985296	1.260460
59	0.27952778	8.78405090	2.45538625		59.00000000	0.58203390	5.11261539	1.281830
60	0.28935385	8.80045030	2.54644418		60.00000000	0.57233333	5.03679106	1.303175
61	0.29948956	8.78132440	2.62991498		61.00000000	0.56295082	4.94345377	1.324554
62	0.30932531	8.79448800	2.72035773		62.00000000	0.55387097	4.87101158	1.346029
63	0.31946620	8.79666900	2.81023842		63.00000000	0.54507937	4.79488275	1.367420
64	0.32927442	8.79738810	2.89675486		64.00000000	0.53656250	4.72034855	1.388774
65	0.33943987	8.79220290	2.98442421		65.00000000	0.52830769	4.64498842	1.410156
66	0.34925777	8.78620910	3.06865180		66.00000000	0.52030303	4.57149122	1.431643
67	0.35941580	8.79546550	3.16122927		67.00000000	0.51253731	4.50800426	1.453033
68	0.36955446	8.78631400	3.24702153		68.00000000	0.50500000	4.43708857	1.474384
69	0.37938648	8.79005530	3.33482814		69.00000000	0.49768116	4.37464491	1.495758
70	0.38950506	8.78248410	3.42082200		70.00000000	0.49057143	4.30843577	1.517234
71	0.39936611	8.77892590	3.50600549		71.00000000	0.48366197	4.24603261	1.538613
72	0.40954721	8.76968380	3.59159953		72.00000000	0.47694444	4.18265197	1.559968
73	0.41932192	8.78965190	3.68569371		73.00000000	0.47041096	4.13474858	1.581338
74	0.42946282	8.76843740	3.76571785		74.00000000	0.46405405	4.06902892	1.602823
75	0.43929633	8.77938180	3.85675020		75.00000000	0.45786667	4.01978628	1.624203
76	0.44942012	8.75352860	3.93401187		76.00000000	0.45184211	3.95521279	1.645562
77	0.45960420	8.76219270	4.02714057		77.00000000	0.44597403	3.90771035	1.666922
78	0.46947941	8.73669150	4.10169677		78.00000000	0.44025641	3.84638444	1.688389
79	0.47956672	8.71881870	4.18125529		79.00000000	0.43468354	3.78992701	1.709762
80	0.48938087	8.71520900	4.26505656		80.00000000	0.42925000	3.74100346	1.731136
81	0.49956346	8.67988490	4.33615333		81.00000000	0.42395062	3.67984256	1.752496
82	0.50936425	8.64258000	4.40222128		82.00000000	0.41878049	3.61934387	1.773977
83	0.51947612	8.58754540	4.46102476		83.00000000	0.41373494	3.55296758	1.795342
84	0.52928132	8.49639130	4.49698120		84.00000000	0.40880952	3.47340568	1.816740
85	0.53938133	8.39812560	4.52979216		85.00000000	0.40400000	3.39284274	1.838212
86	0.54956019	8.24067210	4.52874533		86.00000000	0.39930233	3.29051953	1.859616
87	0.55936241	8.02366160	4.48813469		87.00000000	0.39471264	3.16704068	1.880960
88	0.56946391	7.69458910	4.38179079		88.00000000	0.39022727	3.00263852	1.902337
89	0.57924378	7.32677840	4.24399082		89.00000000	0.38584270	2.82698394	1.923820
90	0.58939660	6.75151820	3.97932187		90.00000000	0.38155556	2.57607928	1.945190
91	0.59922791	6.07154420	3.63823874		91.00000000	0.37736264	2.29117393	1.966528
92	0.60932714	5.14485500	3.13489978		92.00000000	0.37326087	1.92037305	1.988017
93	0.61913013	4.04901500	2.50686718		93.00000000	0.36924731	1.49508790	2.009527
94	0.62917501	2.66133640	1.67444636		94.00000000	0.36531915	0.97223715	2.030908
95	0.63923776	1.02423820	0.65473173		95.00000000	0.36147368	0.37023516	2.052259
96	0.64901471	-0.82434750	-0.53501365		96.00000000	0.35770833	-0.29487597	2.073630
97	0.65915561	-3.01304700	-1.98606683		97.00000000	0.35402062	-1.06668076	2.095112
98	0.66887003	-5.44678310	-3.64318998		98.00000000	0.35040816	-1.90859726	2.116503
99	0.67917919	-8.30799770	-5.64261915		99.00000000	0.34686869	-2.88178425	2.137849
100	0.68463552	-9.99814700	-6.84508657		100.00000000	0.34340000	-3.43336368	2.159322
101	0.68454993	-10.00038600	-6.84576354		101.00000000	0.34000000	-3.40013124	2.180824
00:52 03/04/2018
Test Lot:	JK-PERC
Recipe:	Recipe_YJX-LID
Cell Name:	1-2-10h
Test Order:	3
Test Condition:	Light
1	-0.29984537	8.79201410	-2.63624472		1.00000000	34.34000000	301.91776419	0.000000
2	-0.28998703	8.80945300	-2.55462711		2.00000000	17.17000000	151.25830801	0.061797
3	-0.27985552	8.78786660	-2.45933298		3.00000000	11.44666667	100.59177968	0.083231
4	-0.27004328	8.79237270	-2.37432116		4.00000000	8.58500000	75.48251963	0.104723
5	-0.25989690	8.79813000	-2.28660671		5.00000000	6.86800000	60.42555684	0.126120
6	-0.24971923	8.78647990	-2.19415300		6.00000000	5.72333333	50.28795329	0.147459
7	-0.23990554	8.79475880	-2.10991136		7.00000000	4.90571429	43.14457388	0.168830
8	-0.22972490	8.80899910	-2.02364644		8.00000000	4.29250000	37.81262864	0.190306
9	-0.21986431	8.79024510	-1.93266117		9.00000000	3.81555556	33.53966853	0.211693
10	-0.20976777	8.80751710	-1.84753322		10.00000000	3.43400000	30.24501372	0.233038
11	-0.19994439	8.78291890	-1.75609536		11.00000000	3.12181818	27.41867591	0.254428
12	-0.18977343	8.79718880	-1.66947269		12.00000000	2.86166667	25.17462195	0.275905
13	-0.17999621	8.79545970	-1.58314941		13.00000000	2.64153846	23.23354508	0.297275
14	-0.16982450	8.79441740	-1.49350754		14.00000000	2.45285714	21.57144954	0.318624
15	-0.16004355	8.80451010	-1.40910505		15.00000000	2.28933333	20.15645846	0.339995
16	-0.14992394	8.80360700	-1.31987145		16.00000000	2.14625000	18.89474152	0.361465
17	-0.13973883	8.79504590	-1.22900942		17.00000000	2.02000000	17.76599272	0.382878
18	-0.12993035	8.79779340	-1.14310038		18.00000000	1.90777778	16.78423474	0.404260
19	-0.11978097	8.80644420	-1.05484443		19.00000000	1.80736842	15.91648915	0.425608
20	-0.11003351	8.79161640	-0.96737241		20.00000000	1.71700000	15.09520536	0.447089
21	-0.09980002	8.79502960	-0.87774413		21.00000000	1.63523810	14.38196745	0.468466
22	-0.08996474	8.78323550	-0.79018150		22.00000000	1.56090909	13.70983214	0.489863
23	-0.07982057	8.80243590	-0.70261548		23.00000000	1.49304348	13.14241951	0.511271
24	-0.07002548	8.78777310	-0.61536804		24.00000000	1.43083333	12.57383868	0.532730
25	-0.05984708	8.80113410	-0.52672213		25.00000000	1.37360000	12.08923780	0.554107
26	-0.04979445	8.78998470	-0.43769249		26.00000000	1.32076923	11.60954133	0.575461
27	-0.03991675	8.80401130	-0.35142748		27.00000000	1.27185185	11.19739808	0.596829
28	-0.02978300	8.79105950	-0.26182409		28.00000000	1.22642857	10.78160654	0.618324
29	-0.01994846	8.78407000	-0.17522865		29.00000000	1.18413793	10.40155048	0.639700
30	-0.00980131	8.78710080	-0.08612511		30.00000000	1.14466667	10.05830138	0.661073
31	-0.00061581	8.79384990	-0.00541534		31.00000000	1.10774194	9.74131631	0.682548
32	0.00952964	8.80081840	0.08386863		32.00000000	1.07312500	9.44437825	0.704026
33	0.01933859	8.77467630	0.16968989		33.00000000	1.04060606	9.13098134	0.725411
34	0.02950778	8.80138300	0.25970926		34.00000000	1.01000000	8.88939683	0.746800
35	0.03932269	8.78182220	0.34532483		35.00000000	0.98114286	8.61622212	0.768135
36	0.04944200	8.79826550	0.43500388		36.00000000	0.95388889	8.39256770	0.789612
37	0.05929412	8.79751780	0.52164110		37.00000000	0.92810811	8.16504760	0.810986
38	0.06944322	8.76964860	0.60899262		38.00000000	0.90368421	7.92499297	0.832368
39	0.07955584	8.81120400	0.70098273		39.00000000	0.88051282	7.75837809	0.853848
40	0.08937744	8.80648610	0.78710119		40.00000000	0.85850000	7.56036832	0.875216
41	0.09951909	8.77853010	0.87363132		41.00000000	0.83756098	7.35255423	0.896555
42	0.10936228	8.80092910	0.96248967		42.00000000	0.81761905	7.19580727	0.917927
43	0.11952998	8.78722290	1.05033658		43.00000000	0.79860465	7.01751708	0.939412
44	0.12938061	8.79026510	1.13728986		44.00000000	0.78045455	6.86040235	0.960798
45	0.13951631	8.79881760	1.22757856		45.00000000	0.76311111	6.71447548	0.982143
46	0.14930367	8.79056360	1.31246341		46.00000000	0.74652174	6.56234683	1.003528
47	0.15950114	8.79786300	1.40326918		47.00000000	0.73063830	6.42805565	1.025040
48	0.16963311	8.79396820	1.49174818		48.00000000	0.71541667	6.29135142	1.046419
49	0.17938401	8.79457380	1.57760591		49.00000000	0.70081633	6.16338090	1.067765
50	0.18952417	8.79791160	1.66741689		50.00000000	0.68680000	6.04240569	1.089151
51	0.19933312	8.79532340	1.75319925		51.00000000	0.67333333	5.92218442	1.110642
52	0.20950380	8.79172990	1.84190082		52.00000000	0.66038462	5.80592317	1.132014
53	0.21932539	8.79748440	1.92951170		53.00000000	0.64792453	5.70010593	1.153371
54	0.22944324	8.78411010	2.01545468		54.00000000	0.63592593	5.58604335	1.174749
55	0.23931396	8.79976560	2.10590675		55.00000000	0.62436364	5.49425365	1.196231
56	0.24946231	8.79702570	2.19452635		56.00000000	0.61321429	5.39446183	1.217613
57	0.25957716	8.78841780	2.28127253		57.00000000	0.60245614	5.29463627	1.238970
58	0.26937419	8.79028030	2.36787464		58.00000000	0.59206897	5.20445216	1.260353
59	0.27949724	8.78673080	2.45586701		59.00000000	0.58203390	5.11417518	1.281830
60	0.28930470	8.79589750	2.54469449		60.00000000	0.57233333	5.03418534	1.303206
61	0.29948655	8.78159520	2.62996965		61.00000000	0.56295082	4.94360622	1.324577
62	0.30934089	8.79989430	2.72216713		62.00000000	0.55387097	4.87400597	1.345946
63	0.31947809	8.78214260	2.80570214		63.00000000	0.54507937	4.78696471	1.367425
64	0.32930416	8.78347300	2.89243420		64.00000000	0.53656250	4.71288223	1.388816
65	0.33941677	8.79607390	2.98553499		65.00000000	0.52830769	4.64703350	1.410200
66	0.34922871	8.78273680	3.06718384		66.00000000	0.52030303	4.56968457	1.431538
67	0.35944477	8.79128460	3.15998127		67.00000000	0.51253731	4.50586139	1.453012
68	0.36955816	8.79298690	3.24952006		68.00000000	0.50500000	4.44045838	1.474395
69	0.37943929	8.78437900	3.33313853		69.00000000	0.49768116	4.37181993	1.495780
70	0.38953480	8.78237340	3.42104007		70.00000000	0.49057143	4.30838147	1.517256
71	0.39939883	8.77789400	3.50588059		71.00000000	0.48366197	4.24553352	1.538637
72	0.40951964	8.78829380	3.59897891		72.00000000	0.47694444	4.19152790	1.560049
73	0.41932115	8.78209110	3.68251654		73.00000000	0.47041096	4.13119190	1.581437
74	0.42948288	8.76911260	3.76618373		74.00000000	0.46405405	4.06934225	1.602916
75	0.43935063	8.77433110	3.85500790		75.00000000	0.45786667	4.01747373	1.624306
76	0.44941860	8.76593490	3.93957419		76.00000000	0.45184211	3.96081848	1.645652
77	0.45963171	8.74680710	4.02030990		77.00000000	0.44597403	3.90084878	1.667021
78	0.46944213	8.74942870	4.10735045		78.00000000	0.44025641	3.85199207	1.688497
79	0.47957039	8.73960590	4.19125621		79.00000000	0.43468354	3.79896287	1.709883
80	0.48939198	8.70644000	4.26086191		80.00000000	0.42925000	3.73723937	1.731223
81	0.49948823	8.69299600	4.34204919		81.00000000	0.42395062	3.68540102	1.752607
82	0.50927860	8.63866040	4.39948487		82.00000000	0.41878049	3.61770242	1.774081
83	0.51943809	8.58521650	4.45948846		83.00000000	0.41373494	3.55200403	1.795452
84	0.52930439	8.50308040	4.50071778		84.00000000	0.40880952	3.47614025	1.816816
85	0.53938645	8.39883900	4.53021995		85.00000000	0.40400000	3.39313096	1.838186
86	0.54954672	8.24270340	4.52975062		86.00000000	0.39930233	3.29133064	1.859661
87	0.55939066	8.03108790	4.49251556		87.00000000	0.39471264	3.16997194	1.881047
88	0.56949139	7.71283630	4.39239387		88.00000000	0.39022727	3.00975907	1.902386
89	0.57929361	7.33809470	4.25091137		89.00000000	0.38584270	2.83135025	1.923763
90	0.58936679	6.77830890	3.99491016		90.00000000	0.38155556	2.58630142	1.945232
91	0.59916013	6.07887940	3.64222217		91.00000000	0.37736264	2.29394196	1.966610
92	0.60928684	5.16086480	3.14444701		92.00000000	0.37326087	1.92634888	1.988093
93	0.61911964	4.07814120	2.52485731		93.00000000	0.36924731	1.50584268	2.009522
94	0.62923896	2.67426920	1.68275437		94.00000000	0.36531915	0.97696175	2.031021
95	0.63927865	1.02895390	0.65778826		95.00000000	0.36147368	0.37193976	2.052406
96	0.64908385	-0.84324342	-0.54733569		96.00000000	0.35770833	-0.30163520	2.073781
97	0.65916151	-3.06198050	-2.01833969		97.00000000	0.35402062	-1.08400423	2.095144
98	0.66880971	-5.51083900	-3.68570263		98.00000000	0.35040816	-1.93104297	2.116616
99	0.67916048	-8.44000050	-5.73211479		99.00000000	0.34686869	-2.92757189	2.137997
100	0.68410701	-9.99901100	-6.84039352		100.00000000	0.34340000	-3.43366038	2.159377
101	0.68410927	-10.00017100	-6.84120968		101.00000000	0.34000000	-3.40005814	2.180850
00:53 03/04/2018
Test Lot:	JK-PERC
Recipe:	Recipe_YJX-LID
Cell Name:	1-2-10h
Test Order:	4
Test Condition:	Light
1	-0.29988486	8.78717710	-2.63514137		1.00000000	34.34000000	301.75166161	0.000000
2	-0.29005033	8.79105850	-2.54984942		2.00000000	17.17000000	150.94247445	0.061733
3	-0.27986079	8.80363660	-2.46379269		3.00000000	11.44666667	100.77229361	0.083268
4	-0.27006572	8.79377370	-2.37489683		4.00000000	8.58500000	75.49454721	0.104650
5	-0.25986800	8.80461980	-2.28803894		5.00000000	6.86800000	60.47012879	0.125991
6	-0.24975435	8.79515080	-2.19662717		6.00000000	5.72333333	50.33757975	0.147374
7	-0.23993026	8.80128860	-2.11169546		7.00000000	4.90571429	43.17660722	0.168859
8	-0.22978984	8.79658220	-2.02136522		8.00000000	4.29250000	37.75932909	0.190234
9	-0.21994787	8.79053780	-1.93346007		9.00000000	3.81555556	33.54078534	0.211590
10	-0.20978290	8.80603120	-1.84735476		10.00000000	3.43400000	30.23991114	0.232968
11	-0.19995582	8.78680130	-1.75697206		11.00000000	3.12181818	27.43079606	0.254479
12	-0.18981913	8.80589960	-1.67152820		12.00000000	2.86166667	25.19954936	0.275876
13	-0.18006946	8.79429820	-1.58358453		13.00000000	2.64153846	23.23047694	0.297221
14	-0.16991118	8.80047420	-1.49529896		14.00000000	2.45285714	21.58630600	0.318601
15	-0.16009302	8.78905580	-1.40706649		15.00000000	2.28933333	20.12107841	0.340086
16	-0.14990944	8.80022050	-1.31923613		16.00000000	2.14625000	18.88747325	0.361457
17	-0.13974370	8.80482670	-1.23041906		17.00000000	2.02000000	17.78574993	0.382849
18	-0.12992780	8.79019450	-1.14209063		18.00000000	1.90777778	16.76973773	0.404224
19	-0.11978812	8.80431560	-1.05465241		19.00000000	1.80736842	15.91264198	0.425695
20	-0.10997668	8.79093170	-0.96679748		20.00000000	1.71700000	15.09402973	0.447081
21	-0.09982435	8.80111310	-0.87856537		21.00000000	1.63523810	14.39191542	0.468462
22	-0.08996378	8.79811950	-0.79151208		22.00000000	1.56090909	13.73306471	0.489801
23	-0.07985462	8.78540330	-0.70155500		23.00000000	1.49304348	13.11698910	0.511278
24	-0.07003648	8.79652400	-0.61607756		24.00000000	1.43083333	12.58635976	0.532657
25	-0.05988786	8.78507610	-0.52611944		25.00000000	1.37360000	12.06718053	0.554037
26	-0.04976456	8.79284760	-0.43757218		26.00000000	1.32076923	11.61332256	0.575527
27	-0.03992781	8.79671960	-0.35123375		27.00000000	1.27185185	11.18812411	0.596980
28	-0.02975910	8.79416080	-0.26170633		28.00000000	1.22642857	10.78541007	0.618392
29	-0.01994841	8.79062180	-0.17535889		29.00000000	1.18413793	10.40930871	0.639766
30	-0.00974695	8.79862210	-0.08575971		30.00000000	1.14466667	10.07148943	0.661117
31	-0.00063515	8.79630180	-0.00558701		31.00000000	1.10774194	9.74403238	0.682727
32	0.00953707	8.80130860	0.08393866		32.00000000	1.07312500	9.44490429	0.704101
33	0.01931920	8.78868580	0.16979039		33.00000000	1.04060606	9.14555971	0.725495
34	0.02947794	8.81188200	0.25975616		34.00000000	1.01000000	8.90000082	0.746852
35	0.03923180	8.78081420	0.34448711		35.00000000	0.98114286	8.61523313	0.768330
36	0.04941287	8.79992390	0.43482945		36.00000000	0.95388889	8.39414963	0.789715
37	0.05926348	8.78906440	0.52087050		37.00000000	0.92810811	8.15720193	0.811107
38	0.06941626	8.78708550	0.60996663		38.00000000	0.90368421	7.94075042	0.832451
39	0.07954375	8.79274270	0.69940770		39.00000000	0.88051282	7.74212267	0.853924
40	0.08935863	8.79177670	0.78562110		40.00000000	0.85850000	7.54774030	0.875318
41	0.09948760	8.79170800	0.87466588		41.00000000	0.83756098	7.36359153	0.896699
42	0.10937021	8.79729840	0.96216237		42.00000000	0.81761905	7.19283874	0.918167
43	0.11941136	8.79702000	1.05046412		43.00000000	0.79860465	7.02534109	0.939548
44	0.12927090	8.79476360	1.13690701		44.00000000	0.78045455	6.86391323	0.960908
45	0.13942443	8.79210000	1.22583353		45.00000000	0.76311111	6.70934920	0.982294
46	0.14925569	8.79378220	1.31252203		46.00000000	0.74652174	6.56474958	1.003770
47	0.15937349	8.78975200	1.40085345		47.00000000	0.73063830	6.42212944	1.025153
48	0.16960295	8.79379560	1.49145368		48.00000000	0.71541667	6.29122794	1.046508
49	0.17936423	8.79760550	1.57797574		49.00000000	0.70081633	6.16550557	1.067888
50	0.18956317	8.79141430	1.66652836		50.00000000	0.68680000	6.03794334	1.089373
51	0.19934084	8.79071140	1.75234779		51.00000000	0.67333333	5.91907901	1.110761
52	0.20947205	8.79584690	1.84248408		52.00000000	0.66038462	5.80864197	1.132106
53	0.21933754	8.78944020	1.92785419		53.00000000	0.64792453	5.69489390	1.153484
54	0.22938463	8.78015330	2.01403222		54.00000000	0.63592593	5.58352712	1.174959
55	0.23926204	8.79411600	2.10409813		55.00000000	0.62436364	5.49072624	1.196332
56	0.24937761	8.78848550	2.19165151		56.00000000	0.61321429	5.38922486	1.217671
57	0.25955868	8.78645420	2.28060045		57.00000000	0.60245614	5.29345328	1.239049
58	0.26937729	8.80073450	2.37071801		58.00000000	0.59206897	5.21064177	1.260514
59	0.27948320	8.78719230	2.45587262		59.00000000	0.58203390	5.11444379	1.281913
60	0.28930029	8.78429510	2.54129912		60.00000000	0.57233333	5.02754490	1.303262
61	0.29947171	8.78720860	2.63152039		61.00000000	0.56295082	4.94676628	1.324644
62	0.30927542	8.78790280	2.71788233		62.00000000	0.55387097	4.86736423	1.346110
63	0.31941926	8.78882880	2.80732119		63.00000000	0.54507937	4.79060922	1.367491
64	0.32928550	8.79637910	2.89652009		64.00000000	0.53656250	4.71980716	1.388853
65	0.33935270	8.77795310	2.97882208		65.00000000	0.52830769	4.63746015	1.410230
66	0.34916461	8.79332640	3.07031838		66.00000000	0.52030303	4.57519437	1.431709
67	0.35941118	8.78775600	3.15841775		67.00000000	0.51253731	4.50405285	1.453080
68	0.36954984	8.78513620	3.24654568		68.00000000	0.50500000	4.43649378	1.474472
69	0.37938854	8.77512170	3.32918061		69.00000000	0.49768116	4.36721274	1.495822
70	0.38953909	8.78038020	3.42030131		70.00000000	0.49057143	4.30740366	1.517294
71	0.39934877	8.78550340	3.50847998		71.00000000	0.48366197	4.24921390	1.538686
72	0.40947920	8.77738950	3.59415843		72.00000000	0.47694444	4.18632716	1.560077
73	0.41928887	8.77820010	3.68060160		73.00000000	0.47041096	4.12936153	1.581573
74	0.42943424	8.77229120	3.76712220		74.00000000	0.46405405	4.07081729	1.602947
75	0.43927443	8.77762990	3.85578837		75.00000000	0.45786667	4.01898414	1.624290
76	0.44941530	8.75648210	3.93529703		76.00000000	0.45184211	3.95654731	1.645668
77	0.45958447	8.75914760	4.02556821		77.00000000	0.44597403	3.90635232	1.667142
78	0.46943209	8.74098210	4.10329750		78.00000000	0.44025641	3.84827340	1.688516
79	0.47954768	8.73171040	4.18727146		79.00000000	0.43468354	3.79553082	1.709873
80	0.48937297	8.71216200	4.26349659		80.00000000	0.42925000	3.73969554	1.731247
81	0.49950641	8.68456270	4.33799474		81.00000000	0.42395062	3.68182572	1.752713
82	0.50935853	8.64639850	4.40411683		82.00000000	0.41878049	3.62094298	1.774113
83	0.51949418	8.57912640	4.45680623		83.00000000	0.41373494	3.54948434	1.795465
84	0.52926439	8.51880840	4.50870193		84.00000000	0.40880952	3.48257001	1.816843
85	0.53940898	8.39173030	4.52657468		85.00000000	0.40400000	3.39025904	1.838329
86	0.54951638	8.25006390	4.53354525		86.00000000	0.39930233	3.29426970	1.859706
87	0.55932009	8.03436180	4.49377997		87.00000000	0.39471264	3.17126419	1.881046
88	0.56947064	7.73784830	4.40647742		88.00000000	0.39022727	3.01951944	1.902422
89	0.57924980	7.34116360	4.25236755		89.00000000	0.38584270	2.83253436	1.923895
90	0.58938771	6.79338840	4.00393963		90.00000000	0.38155556	2.59205509	1.945284
91	0.59918028	6.10736940	3.65941531		91.00000000	0.37736264	2.30469302	1.966632
92	0.60929066	5.18001410	3.15613421		92.00000000	0.37326087	1.93349657	1.988097
93	0.61913973	4.08163450	2.52710208		93.00000000	0.36924731	1.50713257	2.009608
94	0.62919730	2.68369270	1.68857220		94.00000000	0.36531915	0.98040433	2.030997
95	0.63927418	1.03436880	0.66124527		95.00000000	0.36147368	0.37389710	2.052360
96	0.64904588	-0.85652244	-0.55592236		96.00000000	0.35770833	-0.30638521	2.073778
97	0.65912867	-3.09193250	-2.03798136		97.00000000	0.35402062	-1.09460786	2.095270
98	0.66884160	-5.58882430	-3.73803819		98.00000000	0.35040816	-1.95836966	2.116693
99	0.67907327	-8.54448890	-5.80233402		99.00000000	0.34686869	-2.96381564	2.138098
100	0.68360972	-9.99998470	-6.83608674		100.00000000	0.34340000	-3.43399475	2.159452
101	0.68362159	-10.00039700	-6.83648730		101.00000000	0.34000000	-3.40013498	2.180925
