# Supplementary material for: Study on the Electrical Injection Regeneration of Industrialized B-Doped Czochralski Silicon PERC Solar Cells
Source: Hindawi journal article supplement (doi:10.1155/2019/5357370), 2019-06-20
Supplement: f1 [file 5357370.f1.zip › section3.1/IVRawData_1-2-11h.csv]

01:52 03/04/2018
Test Lot:	JK-PERC
Recipe:	Recipe_YJX-LID
Cell Name:	1-2-11h
Test Order:	2
Test Condition:	Light
1	-0.29978088	8.78592110	-2.63385116		1.00000000	34.34000000	301.70853057	0.000000
2	-0.28997296	8.80065350	-2.55195155		2.00000000	17.17000000	151.10722060	0.061792
3	-0.27983013	8.80037780	-2.46261086		3.00000000	11.44666667	100.73499122	0.083217
4	-0.26999173	8.81155590	-2.37904722		4.00000000	8.58500000	75.64720740	0.104706
5	-0.25985855	8.77792260	-2.28101824		5.00000000	6.86800000	60.28677242	0.126112
6	-0.24967329	8.80802630	-2.19912890		6.00000000	5.72333333	50.41127052	0.147468
7	-0.23991080	8.79851910	-2.11085976		7.00000000	4.90571429	43.16302084	0.168845
8	-0.22973074	8.79799460	-2.02116981		8.00000000	4.29250000	37.76539182	0.190327
9	-0.21993251	8.80139920	-1.93571382		9.00000000	3.81555556	33.58222761	0.211707
10	-0.20973684	8.80823330	-1.84741102		10.00000000	3.43400000	30.24747315	0.233134
11	-0.19998401	8.79717730	-1.75929479		11.00000000	3.12181818	27.46318804	0.254512
12	-0.18982182	8.81294920	-1.67289006		12.00000000	2.86166667	25.21972296	0.276002
13	-0.18001467	8.79069520	-1.58245410		13.00000000	2.64153846	23.22095947	0.297389
14	-0.16988002	8.80863670	-1.49641138		14.00000000	2.45285714	21.60632745	0.318761
15	-0.16007510	8.79484940	-1.40783640		15.00000000	2.28933333	20.13434189	0.340098
16	-0.14993078	8.80726810	-1.32048058		16.00000000	2.14625000	18.90259916	0.361568
17	-0.13979389	8.79257490	-1.22914825		17.00000000	2.02000000	17.76100130	0.382950
18	-0.12993091	8.81077480	-1.14479199		18.00000000	1.90777778	16.80900037	0.404322
19	-0.11980594	8.80757900	-1.05520028		19.00000000	1.80736842	15.91854015	0.425797
20	-0.10997869	8.79917620	-0.96772187		20.00000000	1.71700000	15.10818554	0.447175
21	-0.09983064	8.79430480	-0.87794109		21.00000000	1.63523810	14.38078223	0.468546
22	-0.08999744	8.80913930	-0.79279999		22.00000000	1.56090909	13.75026562	0.489910
23	-0.07989107	8.79817870	-0.70289592		23.00000000	1.49304348	13.13606333	0.511386
24	-0.07004819	8.79375740	-0.61598680		24.00000000	1.43083333	12.58240121	0.532767
25	-0.05989195	8.80410290	-0.52729493		25.00000000	1.37360000	12.09331574	0.554119
26	-0.04971339	8.80631070	-0.43779154		26.00000000	1.32076923	11.63110421	0.575492
27	-0.03994345	8.78750990	-0.35100349		27.00000000	1.27185185	11.17641074	0.596977
28	-0.02975223	8.80487060	-0.26196457		28.00000000	1.22642857	10.79854487	0.618351
29	-0.01991382	8.79001330	-0.17504275		29.00000000	1.18413793	10.40858816	0.639697
30	-0.00978066	8.80439000	-0.08611272		30.00000000	1.14466667	10.07809175	0.661086
31	-0.00059873	8.78528210	-0.00526005		31.00000000	1.10774194	9.73182540	0.682684
32	0.00953571	8.80888750	0.08399898		32.00000000	1.07312500	9.45303740	0.704068
33	0.01932546	8.80784610	0.17021569		33.00000000	1.04060606	9.16549803	0.725432
34	0.02949555	8.77751540	0.25889764		34.00000000	1.01000000	8.86529055	0.746816
35	0.03930838	8.82306860	0.34682051		35.00000000	0.98114286	8.65669073	0.768351
36	0.04948517	8.79105090	0.43502661		36.00000000	0.95388889	8.38568578	0.789738
37	0.05928832	8.79706860	0.52156337		37.00000000	0.92810811	8.16463070	0.811085
38	0.06942863	8.79722690	0.61077941		38.00000000	0.90368421	7.94991505	0.832461
39	0.07956970	8.81573100	0.70146504		39.00000000	0.88051282	7.76236417	0.853927
40	0.08937433	8.79775430	0.78629343		40.00000000	0.85850000	7.55287207	0.875322
41	0.09953401	8.80120560	0.87601924		41.00000000	0.83756098	7.37154635	0.896707
42	0.10935651	8.79288010	0.96155868		42.00000000	0.81761905	7.18922625	0.918073
43	0.11952213	8.80536750	1.05243628		43.00000000	0.79860465	7.03200744	0.939543
44	0.12932231	8.79092880	1.13686322		44.00000000	0.78045455	6.86092034	0.960930
45	0.13948049	8.79741570	1.22706785		45.00000000	0.76311111	6.71340567	0.982306
46	0.14927693	8.80162430	1.31387945		46.00000000	0.74652174	6.57060388	1.003654
47	0.15942767	8.78770830	1.40100386		47.00000000	0.73063830	6.42063623	1.025120
48	0.16955608	8.80436330	1.49283333		48.00000000	0.71541667	6.29878824	1.046488
49	0.17939869	8.78737450	1.57644347		49.00000000	0.70081633	6.15833552	1.067866
50	0.18956803	8.80270100	1.66871069		50.00000000	0.68680000	6.04569505	1.089353
51	0.19934215	8.79078390	1.75237376		51.00000000	0.67333333	5.91912783	1.110719
52	0.20945865	8.80161290	1.84357396		52.00000000	0.66038462	5.81244975	1.132084
53	0.21933250	8.79814150	1.92971837		53.00000000	0.64792453	5.70053168	1.153459
54	0.22945347	8.80043790	2.01929101		54.00000000	0.63592593	5.59642662	1.174927
55	0.23929383	8.79437830	2.10444047		55.00000000	0.62436364	5.49089001	1.196318
56	0.24942820	8.81180570	2.19791283		56.00000000	0.61321429	5.40352514	1.217666
57	0.25956032	8.78617950	2.28054356		57.00000000	0.60245614	5.29328779	1.239041
58	0.26941186	8.80116750	2.37113891		58.00000000	0.59206897	5.21089814	1.260541
59	0.27958566	8.79369260	2.45859035		59.00000000	0.58203390	5.11822718	1.281913
60	0.28938735	8.80146410	2.54703237		60.00000000	0.57233333	5.03737129	1.303261
61	0.29952094	8.79698660	2.63488170		61.00000000	0.56295082	4.95227082	1.324641
62	0.30933005	8.79597570	2.72085960		62.00000000	0.55387097	4.87183557	1.346129
63	0.31947038	8.79053690	2.80831616		63.00000000	0.54507937	4.79154027	1.367552
64	0.32933232	8.81395340	2.90271972		64.00000000	0.53656250	4.72923687	1.388909
65	0.33947191	8.79307170	2.98500084		65.00000000	0.52830769	4.64544742	1.410286
66	0.34927952	8.78544710	3.06857675		66.00000000	0.52030303	4.57109475	1.431765
67	0.35943398	8.80107880	3.16340678		67.00000000	0.51253731	4.51088128	1.453141
68	0.36956462	8.79828550	3.25153504		68.00000000	0.50500000	4.44313418	1.474495
69	0.37940127	8.77203180	3.32812001		69.00000000	0.49768116	4.36567496	1.495863
70	0.38956687	8.79111770	3.42472821		70.00000000	0.49057143	4.31267117	1.517339
71	0.39937970	8.79119110	3.51102326		71.00000000	0.48366197	4.25196482	1.538712
72	0.40951109	8.77905370	3.59511985		72.00000000	0.47694444	4.18712089	1.560084
73	0.41935220	8.78363800	3.68343792		73.00000000	0.47041096	4.13191957	1.581445
74	0.42949250	8.76507760	3.76453509		74.00000000	0.46405405	4.06746979	1.602923
75	0.43930757	8.77235700	3.85376284		75.00000000	0.45786667	4.01656986	1.624310
76	0.44943225	8.76639940	3.93990261		76.00000000	0.45184211	3.96102836	1.645691
77	0.45960832	8.75293540	4.02292193		77.00000000	0.44597403	3.90358184	1.667038
78	0.46946877	8.75918870	4.11216555		78.00000000	0.44025641	3.85628897	1.688499
79	0.47959793	8.73610690	4.18981879		79.00000000	0.43468354	3.79744191	1.709875
80	0.48940107	8.71462630	4.26494744		80.00000000	0.42925000	3.74075334	1.731274
81	0.49954659	8.68785190	4.33998679		81.00000000	0.42395062	3.68322018	1.752748
82	0.50936317	8.65072920	4.40636285		82.00000000	0.41878049	3.62275659	1.774125
83	0.51949823	8.57902720	4.45678945		83.00000000	0.41373494	3.54944330	1.795485
84	0.52928799	8.50959680	4.50402739		84.00000000	0.40880952	3.47880422	1.816868
85	0.53943503	8.39871600	4.53056162		85.00000000	0.40400000	3.39308126	1.838347
86	0.54955751	8.24865250	4.53310893		86.00000000	0.39930233	3.29370613	1.859738
87	0.55935544	8.02714350	4.49002638		87.00000000	0.39471264	3.16841503	1.881101
88	0.56948233	7.72052670	4.39670353		88.00000000	0.39022727	3.01276008	1.902477
89	0.57928920	7.32131240	4.24115720		89.00000000	0.38584270	2.82487492	1.923963
90	0.58941835	6.75776150	3.98314863		90.00000000	0.38155556	2.57846144	1.945324
91	0.59920144	6.07953070	3.64286355		91.00000000	0.37736264	2.29418774	1.966734
92	0.60931641	5.15170050	3.13901565		92.00000000	0.37326087	1.92292821	1.988222
93	0.61914116	4.05145790	2.50842434		93.00000000	0.36924731	1.49598994	2.009733
94	0.62927032	2.67743870	1.68483271		94.00000000	0.36531915	0.97811963	2.031131
95	0.63929451	1.03346940	0.66069131		95.00000000	0.36147368	0.37357199	2.052476
96	0.64908874	-0.81831187	-0.53115702		96.00000000	0.35770833	-0.29271698	2.073852
97	0.65915239	-3.01493760	-1.98730332		97.00000000	0.35402062	-1.06735007	2.095327
98	0.66886103	-5.44254780	-3.64030813		98.00000000	0.35040816	-1.90711318	2.116704
99	0.67918813	-8.32677170	-5.65544450		99.00000000	0.34686869	-2.88829637	2.138054
100	0.68454415	-9.99828620	-6.84426833		100.00000000	0.34340000	-3.43341148	2.159446
101	0.68454713	-10.00025600	-6.84564654		101.00000000	0.34000000	-3.40008704	2.180912
01:52 03/04/2018
Test Lot:	JK-PERC
Recipe:	Recipe_YJX-LID
Cell Name:	1-2-11h
Test Order:	3
Test Condition:	Light
1	-0.29987961	8.81121540	-2.64230384		1.00000000	34.34000000	302.57713684	0.000000
2	-0.29000419	8.78500460	-2.54768814		2.00000000	17.17000000	150.83852898	0.061774
3	-0.27985337	8.80572800	-2.46431266		3.00000000	11.44666667	100.79623317	0.083186
4	-0.27005014	8.79549690	-2.37522517		4.00000000	8.58500000	75.50934089	0.104696
5	-0.25985318	8.80198480	-2.28722374		5.00000000	6.86800000	60.45203161	0.126081
6	-0.24973065	8.79317190	-2.19592453		6.00000000	5.72333333	50.32625384	0.147452
7	-0.23988201	8.79353430	-2.10941068		7.00000000	4.90571429	43.13856684	0.168815
8	-0.22976916	8.80290130	-2.02263524		8.00000000	4.29250000	37.78645383	0.190291
9	-0.21991903	8.80164430	-1.93564908		9.00000000	3.81555556	33.58316281	0.211679
10	-0.20976152	8.79893970	-1.84567897		10.00000000	3.43400000	30.21555893	0.233059
11	-0.19992480	8.79851530	-1.75904141		11.00000000	3.12181818	27.46736504	0.254401
12	-0.18982980	8.80105400	-1.67070232		12.00000000	2.86166667	25.18568286	0.275875
13	-0.18001093	8.79026790	-1.58234430		13.00000000	2.64153846	23.21983075	0.297243
14	-0.16986607	8.80201820	-1.49516424		14.00000000	2.45285714	21.59009321	0.318632
15	-0.16005763	8.79337410	-1.40744662		15.00000000	2.28933333	20.13096444	0.340105
16	-0.14988820	8.79176710	-1.31778215		16.00000000	2.14625000	18.86933014	0.361479
17	-0.13974558	8.79636960	-1.22925377		17.00000000	2.02000000	17.76866659	0.382833
18	-0.12994756	8.79811670	-1.14329380		18.00000000	1.90777778	16.78485153	0.404208
19	-0.11982056	8.80033110	-1.05446060		19.00000000	1.80736842	15.90544052	0.425697
20	-0.11001509	8.79248240	-0.96730574		20.00000000	1.71700000	15.09669228	0.447071
21	-0.09984493	8.80106350	-0.87874153		21.00000000	1.63523810	14.39183431	0.468425
22	-0.09003574	8.79791640	-0.79212695		22.00000000	1.56090909	13.73274769	0.489804
23	-0.07989683	8.79482750	-0.70267884		23.00000000	1.49304348	13.13105984	0.511290
24	-0.07005415	8.79388430	-0.61604810		24.00000000	1.43083333	12.58258279	0.532674
25	-0.05990110	8.80503560	-0.52743134		25.00000000	1.37360000	12.09459690	0.554019
26	-0.04976294	8.78823380	-0.43732833		26.00000000	1.32076923	11.60722880	0.575403
27	-0.03993366	8.79892440	-0.35137321		27.00000000	1.27185185	11.19092829	0.596888
28	-0.02975604	8.80645080	-0.26204513		28.00000000	1.22642857	10.80048287	0.618279
29	-0.01996696	8.79523940	-0.17561416		29.00000000	1.18413793	10.41477659	0.639626
30	-0.00984889	8.79698370	-0.08664050		30.00000000	1.14466667	10.06961401	0.661002
31	-0.00065301	8.79451370	-0.00574291		31.00000000	1.10774194	9.74205163	0.682583
32	0.00953556	8.78590580	0.08377852		32.00000000	1.07312500	9.42837516	0.703956
33	0.01930948	8.80226520	0.16996718		33.00000000	1.04060606	9.15969051	0.725299
34	0.02946299	8.79910470	0.25924792		34.00000000	1.01000000	8.88709575	0.746683
35	0.03933813	8.79510120	0.34598284		35.00000000	0.98114286	8.62925072	0.768157
36	0.04944698	8.79878620	0.43507341		36.00000000	0.95388889	8.39306439	0.789528
37	0.05924695	8.79480270	0.52106527		37.00000000	0.92810811	8.16252770	0.810908
38	0.06941906	8.80118560	0.61097007		38.00000000	0.90368421	7.95349246	0.832268
39	0.07953759	8.79885580	0.69983981		39.00000000	0.88051282	7.74750534	0.853746
40	0.08939339	8.80675320	0.78726548		40.00000000	0.85850000	7.56059762	0.875122
41	0.09949405	8.79179190	0.87473096		41.00000000	0.83756098	7.36366180	0.896508
42	0.10936993	8.80888370	0.96342699		42.00000000	0.81761905	7.20231110	0.917869
43	0.11951451	8.79027180	1.05056503		43.00000000	0.79860465	7.01995194	0.939343
44	0.12931970	8.79898450	1.13788204		44.00000000	0.78045455	6.86720745	0.960728
45	0.13947469	8.79009440	1.22599569		45.00000000	0.76311111	6.70781870	0.982119
46	0.14927317	8.79074190	1.31222191		46.00000000	0.74652174	6.56247993	1.003591
47	0.15945125	8.79876610	1.40297425		47.00000000	0.73063830	6.42871549	1.024972
48	0.16957125	8.79122260	1.49073861		48.00000000	0.71541667	6.28938717	1.046322
49	0.17941141	8.79951000	1.57873250		49.00000000	0.70081633	6.16684027	1.067706
50	0.18956418	8.79373930	1.66697798		50.00000000	0.68680000	6.03954015	1.089188
51	0.19929568	8.80512050	1.75482248		51.00000000	0.67333333	5.92878114	1.110570
52	0.20947449	8.79902460	1.84317119		52.00000000	0.66038462	5.81074048	1.131915
53	0.21930870	8.80032830	1.92998856		53.00000000	0.64792453	5.70194856	1.153286
54	0.22943318	8.78702930	2.01603608		54.00000000	0.63592593	5.58789974	1.174771
55	0.23924655	8.79742050	2.10475250		55.00000000	0.62436364	5.49278945	1.196150
56	0.24940526	8.79578690	2.19371552		56.00000000	0.61321429	5.39370218	1.217518
57	0.25953197	8.78833580	2.28085410		57.00000000	0.60245614	5.29458687	1.238894
58	0.26940042	8.78755660	2.36737144		58.00000000	0.59206897	5.20283955	1.260377
59	0.27955467	8.80211350	2.46067193		59.00000000	0.58203390	5.12312843	1.281766
60	0.28935391	8.79233930	2.54409775		60.00000000	0.57233333	5.03214886	1.303126
61	0.29948136	8.79113290	2.63278044		61.00000000	0.56295082	4.94897547	1.324502
62	0.30931929	8.78813740	2.71834042		62.00000000	0.55387097	4.86749417	1.345975
63	0.31944600	8.79817010	2.81054025		63.00000000	0.54507937	4.79570097	1.367347
64	0.32927427	8.77960110	2.89089674		64.00000000	0.53656250	4.71080472	1.388688
65	0.33942628	8.78886130	2.98317050		65.00000000	0.52830769	4.64322303	1.410069
66	0.34924188	8.78722950	3.06886855		66.00000000	0.52030303	4.57202214	1.431546
67	0.35937902	8.78610420	3.15754152		67.00000000	0.51253731	4.50320624	1.452910
68	0.36955112	8.78290180	3.24573120		68.00000000	0.50500000	4.43536541	1.474290
69	0.37937045	8.79458520	3.33640574		69.00000000	0.49768116	4.37689936	1.495654
70	0.38956639	8.77954770	3.42021670		70.00000000	0.49057143	4.30699526	1.517118
71	0.39935073	8.78246310	3.50728305		71.00000000	0.48366197	4.24774342	1.538492
72	0.40950200	8.78728100	3.59840914		72.00000000	0.47694444	4.19104485	1.559877
73	0.41928709	8.77959630	3.68117138		73.00000000	0.47041096	4.13001831	1.581230
74	0.42943835	8.76810740	3.76536157		74.00000000	0.46405405	4.06887579	1.602707
75	0.43926883	8.76540090	3.85036740		75.00000000	0.45786667	4.01338489	1.624088
76	0.44944841	8.75351910	3.93425524		76.00000000	0.45184211	3.95520850	1.645480
77	0.45954460	8.76002690	4.02562306		77.00000000	0.44597403	3.90674446	1.666967
78	0.46943462	8.74035640	4.10302589		78.00000000	0.44025641	3.84799793	1.688345
79	0.47957325	8.73780160	4.19041591		79.00000000	0.43468354	3.79817857	1.709712
80	0.48940894	8.70953660	4.26252508		80.00000000	0.42925000	3.73856859	1.731088
81	0.49953043	8.66831300	4.33008612		81.00000000	0.42395062	3.67493665	1.752583
82	0.50933862	8.63779350	4.39956182		82.00000000	0.41878049	3.61733938	1.773973
83	0.51949656	8.58667090	4.46074599		83.00000000	0.41373494	3.55260577	1.795323
84	0.52923554	8.51110740	4.50438052		84.00000000	0.40880952	3.47942176	1.816755
85	0.53936374	8.39171600	4.52618733		85.00000000	0.40400000	3.39025326	1.838233
86	0.54953510	8.25082970	4.53412052		86.00000000	0.39930233	3.29457549	1.859614
87	0.55929559	8.02711960	4.48953259		87.00000000	0.39471264	3.16840560	1.880973
88	0.56947589	7.72050240	4.39663998		88.00000000	0.39022727	3.01275060	1.902346
89	0.57924092	7.33158020	4.24675126		89.00000000	0.38584270	2.82883667	1.923822
90	0.58938253	6.76987460	3.99004582		90.00000000	0.38155556	2.58308326	1.945207
91	0.59915942	6.08474540	3.64573252		91.00000000	0.37736264	2.29615557	1.966560
92	0.60927641	5.16568950	3.14733275		92.00000000	0.37326087	1.92814975	1.988033
93	0.61909723	4.07096620	2.52032390		93.00000000	0.36924731	1.50319333	2.009543
94	0.62921500	2.66637640	1.67772403		94.00000000	0.36531915	0.97407836	2.030916
95	0.63924277	1.04084970	0.66535565		95.00000000	0.36147368	0.37623978	2.052256
96	0.64900774	-0.84559542	-0.54879797		96.00000000	0.35770833	-0.30247653	2.073687
97	0.65912926	-3.05033590	-2.01056564		97.00000000	0.35402062	-1.07988180	2.095171
98	0.66888529	-5.50559900	-3.68261418		98.00000000	0.35040816	-1.92920683	2.116547
99	0.67911768	-8.42744260	-5.72322527		99.00000000	0.34686869	-2.92321595	2.137921
100	0.68412524	-9.99885270	-6.84046750		100.00000000	0.34340000	-3.43360602	2.159280
101	0.68410963	-10.00021900	-6.84124612		101.00000000	0.34000000	-3.40007446	2.180756
01:52 03/04/2018
Test Lot:	JK-PERC
Recipe:	Recipe_YJX-LID
Cell Name:	1-2-11h
Test Order:	4
Test Condition:	Light
1	-0.29978082	8.81117820	-2.64142223		1.00000000	34.34000000	302.57585939	0.000000
2	-0.28996637	8.80929090	-2.55439810		2.00000000	17.17000000	151.25552475	0.061751
3	-0.27984530	8.79059790	-2.46000751		3.00000000	11.44666667	100.62304396	0.083305
4	-0.27002120	8.78912260	-2.37324943		4.00000000	8.58500000	75.45461752	0.104744
5	-0.25988078	8.78859520	-2.28398698		5.00000000	6.86800000	60.36007183	0.126107
6	-0.24970536	8.80293370	-2.19813973		6.00000000	5.72333333	50.38212388	0.147495
7	-0.23991327	8.79474350	-2.10997567		7.00000000	4.90571429	43.14449883	0.169001
8	-0.22974753	8.79704000	-2.02109821		8.00000000	4.29250000	37.76129420	0.190381
9	-0.21993758	8.80013560	-1.93548053		9.00000000	3.81555556	33.57740628	0.211733
10	-0.20978449	8.79391100	-1.84482613		10.00000000	3.43400000	30.19829037	0.233127
11	-0.19996040	8.80579280	-1.76080985		11.00000000	3.12181818	27.49008407	0.254604
12	-0.18978721	8.78474040	-1.66723137		12.00000000	2.86166667	25.13899878	0.276035
13	-0.17998470	8.81007860	-1.58567935		13.00000000	2.64153846	23.27216147	0.297390
14	-0.16984352	8.80710790	-1.49583021		14.00000000	2.45285714	21.60257752	0.318761
15	-0.16004696	8.79987340	-1.40839299		15.00000000	2.28933333	20.14584350	0.340248
16	-0.14991845	8.79415800	-1.31840654		16.00000000	2.14625000	18.87446161	0.361617
17	-0.13973559	8.79337690	-1.22874771		17.00000000	2.02000000	17.76262134	0.382948
18	-0.12991001	8.80250840	-1.14353395		18.00000000	1.90777778	16.79322991	0.404316
19	-0.11977032	8.79637240	-1.05354434		19.00000000	1.80736842	15.89828570	0.425790
20	-0.10998790	8.79160590	-0.96697027		20.00000000	1.71700000	15.09518733	0.447175
21	-0.09977676	8.79649070	-0.87768534		21.00000000	1.63523810	14.38435670	0.468529
22	-0.09003603	8.79216860	-0.79161193		22.00000000	1.56090909	13.72377590	0.489894
23	-0.07983233	8.79918580	-0.70245950		23.00000000	1.49304348	13.13756697	0.511367
24	-0.06998441	8.78883080	-0.61508117		24.00000000	1.43083333	12.57535207	0.532744
25	-0.05985664	8.81331920	-0.52753563		25.00000000	1.37360000	12.10597525	0.554090
26	-0.04969537	8.79531570	-0.43708642		26.00000000	1.32076923	11.61658235	0.575465
27	-0.03992560	8.78423980	-0.35071603		27.00000000	1.27185185	11.17225166	0.596946
28	-0.02974498	8.80292890	-0.26184292		28.00000000	1.22642857	10.79616352	0.618317
29	-0.01991567	8.81033330	-0.17546367		29.00000000	1.18413793	10.43264985	0.639692
30	-0.00984148	8.80158420	-0.08662063		30.00000000	1.14466667	10.07488005	0.661056
31	-0.00059645	8.78876210	-0.00524208		31.00000000	1.10774194	9.73568034	0.682650
32	0.00954823	8.79607870	0.08398702		32.00000000	1.07312500	9.43929195	0.704035
33	0.01934005	8.80253700	0.17024150		33.00000000	1.04060606	9.15997335	0.725417
34	0.02944744	8.79278280	0.25892494		34.00000000	1.01000000	8.88071063	0.746762
35	0.03935388	8.80350780	0.34645216		35.00000000	0.98114286	8.63749880	0.768237
36	0.04938833	8.78839870	0.43404431		36.00000000	0.95388889	8.38315587	0.789618
37	0.05927244	8.79597660	0.52135895		37.00000000	0.92810811	8.16361720	0.811000
38	0.06936047	8.78791810	0.60953415		38.00000000	0.90368421	7.94150283	0.832481
39	0.07961895	8.79592130	0.70032204		39.00000000	0.88051282	7.74492147	0.853853
40	0.08935867	8.79017260	0.78547815		40.00000000	0.85850000	7.54636318	0.875241
41	0.09948393	8.78469560	0.87393604		41.00000000	0.83756098	7.35771822	0.896625
42	0.10936654	8.79774570	0.96217901		42.00000000	0.81761905	7.19320446	0.918105
43	0.11949999	8.78747370	1.05010302		43.00000000	0.79860465	7.01771737	0.939493
44	0.12932976	8.78915600	1.13669944		44.00000000	0.78045455	6.85953675	0.960843
45	0.13953912	8.80207630	1.22823398		45.00000000	0.76311111	6.71696223	0.982230
46	0.14931084	8.79373740	1.31300032		46.00000000	0.74652174	6.56471614	1.003713
47	0.15947108	8.79836850	1.40308533		47.00000000	0.73063830	6.42842498	1.025090
48	0.16962685	8.79375550	1.49165705		48.00000000	0.71541667	6.29119925	1.046442
49	0.17940973	8.78921600	1.57687087		49.00000000	0.70081633	6.15962607	1.067818
50	0.18957220	8.79147240	1.66661876		50.00000000	0.68680000	6.03798324	1.089295
51	0.19935210	8.79237370	1.75277816		51.00000000	0.67333333	5.92019829	1.110662
52	0.20945801	8.79217150	1.84159075		52.00000000	0.66038462	5.80621479	1.132029
53	0.21929745	8.79774760	1.92932361		53.00000000	0.64792453	5.70027646	1.153402
54	0.22944653	8.80519010	2.02032031		54.00000000	0.63592593	5.59944867	1.174867
55	0.23928821	8.79264550	2.10397640		55.00000000	0.62436364	5.48980812	1.196254
56	0.24943654	8.79318330	2.19334122		56.00000000	0.61321429	5.39210562	1.217602
57	0.25958785	8.79055790	2.28192203		57.00000000	0.60245614	5.29592558	1.238975
58	0.26939529	8.78692530	2.36715629		58.00000000	0.59206897	5.20246577	1.260451
59	0.27961209	8.80437560	2.46180986		59.00000000	0.58203390	5.12444505	1.281825
60	0.28936893	8.78696820	2.54267559		60.00000000	0.57233333	5.02907480	1.303201
61	0.29949343	8.79806800	2.63496356		61.00000000	0.56295082	4.95287959	1.324569
62	0.30933884	8.79572300	2.72085875		62.00000000	0.55387097	4.87169561	1.346058
63	0.31946409	8.77998920	2.80489126		63.00000000	0.54507937	4.78579094	1.367443
64	0.32930875	8.78282450	2.89226096		64.00000000	0.53656250	4.71253427	1.388821
65	0.33944741	8.79293920	2.98474044		65.00000000	0.52830769	4.64537742	1.410158
66	0.34923998	8.79652880	3.07209954		66.00000000	0.52030303	4.57686059	1.431630
67	0.35942253	8.78424840	3.15725678		67.00000000	0.51253731	4.50225508	1.453022
68	0.36957011	8.79254250	3.24946090		68.00000000	0.50500000	4.44023396	1.474399
69	0.37940583	8.78703500	3.33385231		69.00000000	0.49768116	4.37314177	1.495878
70	0.38958842	8.79744050	3.42738094		70.00000000	0.49057143	4.31577295	1.517260
71	0.39937800	8.77745910	3.50552406		71.00000000	0.48366197	4.24532318	1.538620
72	0.40951365	8.77654170	3.59411363		72.00000000	0.47694444	4.18592281	1.559995
73	0.41931143	8.78321170	3.68290106		73.00000000	0.47041096	4.13171904	1.581476
74	0.42946869	8.77651310	3.76923758		74.00000000	0.46405405	4.07277648	1.602856
75	0.43929920	8.76914880	3.85228005		75.00000000	0.45786667	4.01510093	1.624202
76	0.44944605	8.77299500	3.94298795		76.00000000	0.45184211	3.96400853	1.645568
77	0.45962936	8.75153060	4.02246041		77.00000000	0.44597403	3.90295534	1.667055
78	0.46946731	8.73789790	4.10215742		78.00000000	0.44025641	3.84691556	1.688422
79	0.47962084	8.74117760	4.19245094		79.00000000	0.43468354	3.79964606	1.709771
80	0.48940301	8.70684620	4.26115674		80.00000000	0.42925000	3.73741373	1.731161
81	0.49954984	8.69057560	4.34137565		81.00000000	0.42395062	3.68437489	1.752639
82	0.50939745	8.64233590	4.40238387		82.00000000	0.41878049	3.61924164	1.774013
83	0.51951456	8.58797260	4.46157681		83.00000000	0.41373494	3.55314433	1.795378
84	0.52926689	8.50164890	4.49964127		84.00000000	0.40880952	3.47555504	1.816755
85	0.53942192	8.40019420	4.53124888		85.00000000	0.40400000	3.39367846	1.838235
86	0.54955834	8.25739000	4.53791754		86.00000000	0.39930233	3.29719503	1.859607
87	0.55937922	8.01976200	4.48608821		87.00000000	0.39471264	3.16550146	1.880948
88	0.56947023	7.73201470	4.40315219		88.00000000	0.39022727	3.01724301	1.902330
89	0.57925087	7.33304930	4.24767519		89.00000000	0.38584270	2.82940352	1.923808
90	0.58943415	6.77999780	3.99636224		90.00000000	0.38155556	2.58694583	1.945185
91	0.59922749	6.08939980	3.64893576		91.00000000	0.37736264	2.29791197	1.966565
92	0.60933262	5.17448950	3.15298524		92.00000000	0.37326087	1.93143445	1.988033
93	0.61914307	4.06352420	2.51590285		93.00000000	0.36924731	1.50044539	2.009541
94	0.62924075	2.69262500	1.69430937		94.00000000	0.36531915	0.98366747	2.030944
95	0.63929307	1.02149580	0.65303519		95.00000000	0.36147368	0.36924385	2.052381
96	0.64904916	-0.84844577	-0.55068301		96.00000000	0.35770833	-0.30349612	2.073743
97	0.65915060	-3.06436850	-2.01988034		97.00000000	0.35402062	-1.08484963	2.095232
98	0.66886574	-5.53806070	-3.70421907		98.00000000	0.35040816	-1.94058168	2.116605
99	0.67916518	-8.44834040	-5.73781863		99.00000000	0.34686869	-2.93046474	2.137999
100	0.68404251	-9.99929330	-6.83994169		100.00000000	0.34340000	-3.43375732	2.159470
101	0.68404990	-10.00037600	-6.84075620		101.00000000	0.34000000	-3.40012784	2.180837
