# Supplementary material for: Study on the Electrical Injection Regeneration of Industrialized B-Doped Czochralski Silicon PERC Solar Cells
Source: Hindawi journal article supplement (doi:10.1155/2019/5357370), 2019-06-20
Supplement: f1 [file 5357370.f1.zip › section3.1/IVRawData_1-2-12h.csv]

02:51 03/04/2018
Test Lot:	JK-PERC
Recipe:	Recipe_YJX-LID
Cell Name:	1-2-12h
Test Order:	2
Test Condition:	Light
1	-0.29980570	8.81983280	-2.64423615		1.00000000	34.34000000	302.87305835	0.000000
2	-0.28999254	8.81212140	-2.55544947		2.00000000	17.17000000	151.30412444	0.061759
3	-0.27985260	8.81235980	-2.46616180		3.00000000	11.44666667	100.87214518	0.083149
4	-0.27006623	8.82363800	-2.38296665		4.00000000	8.58500000	75.75093223	0.104658
5	-0.25990325	8.81439970	-2.29089113		5.00000000	6.86800000	60.53729714	0.126046
6	-0.24970900	8.81367020	-2.20085277		6.00000000	5.72333333	50.44357244	0.147438
7	-0.23990625	8.81512740	-2.11480416		7.00000000	4.90571429	43.24449642	0.168789
8	-0.22977675	8.81027220	-2.02439571		8.00000000	4.29250000	37.81809342	0.190259
9	-0.21996582	8.82563210	-1.94133740		9.00000000	3.81555556	33.67468959	0.211638
10	-0.20980953	8.80747220	-1.84789160		10.00000000	3.43400000	30.24485953	0.233014
11	-0.19997254	8.82511140	-1.76477994		11.00000000	3.12181818	27.55039323	0.254557
12	-0.18983708	8.81321430	-1.67307487		12.00000000	2.86166667	25.22048159	0.276014
13	-0.18002914	8.81747530	-1.58740250		13.00000000	2.64153846	23.29170014	0.297380
14	-0.16989666	8.81454940	-1.49756250		14.00000000	2.45285714	21.62083046	0.318762
15	-0.16011029	8.81520370	-1.41140482		15.00000000	2.28933333	20.18093967	0.340097
16	-0.14993389	8.80830670	-1.32066369		16.00000000	2.14625000	18.90482825	0.361592
17	-0.13981184	8.81163410	-1.23197078		17.00000000	2.02000000	17.79950088	0.382977
18	-0.12999421	8.80690670	-1.14484688		18.00000000	1.90777778	16.80162089	0.404379
19	-0.11983865	8.81200980	-1.05601936		19.00000000	1.80736842	15.92654824	0.425726
20	-0.11002475	8.80765910	-0.96906049		20.00000000	1.71700000	15.12275067	0.447190
21	-0.09987962	8.82668500	-0.88160590		21.00000000	1.63523810	14.43373157	0.468567
22	-0.09004338	8.81104660	-0.79337643		22.00000000	1.56090909	13.75324274	0.489945
23	-0.07991462	8.81291580	-0.70428083		23.00000000	1.49304348	13.15806646	0.511312
24	-0.07006276	8.81709100	-0.61774970		24.00000000	1.43083333	12.61578771	0.532793
25	-0.05994889	8.81800560	-0.52862963		25.00000000	1.37360000	12.11241249	0.554159
26	-0.04979482	8.80386450	-0.43838687		26.00000000	1.32076923	11.62787334	0.575554
27	-0.03995784	8.82879920	-0.35277975		27.00000000	1.27185185	11.22892461	0.597040
28	-0.02980154	8.80870530	-0.26251302		28.00000000	1.22642857	10.80324786	0.618419
29	-0.01996903	8.82466890	-0.17622007		29.00000000	1.18413793	10.44962517	0.639772
30	-0.00984697	8.80225750	-0.08667558		30.00000000	1.14466667	10.07565075	0.661151
31	-0.00067095	8.80774590	-0.00590955		31.00000000	1.10774194	9.75670949	0.682755
32	0.00947918	8.81298450	0.08353991		32.00000000	1.07312500	9.45743399	0.704131
33	0.01930621	8.81209180	0.17012809		33.00000000	1.04060606	9.16991613	0.725470
34	0.02946073	8.80541990	0.25941408		34.00000000	1.01000000	8.89347410	0.746847
35	0.03927436	8.81062600	0.34603167		35.00000000	0.98114286	8.64448277	0.768333
36	0.04943259	8.81774710	0.43588411		36.00000000	0.95388889	8.41115098	0.789712
37	0.05924920	8.81296060	0.52216087		37.00000000	0.92810811	8.17938019	0.811070
38	0.06939181	8.80473040	0.61097617		38.00000000	0.90368421	7.95669584	0.832449
39	0.07954633	8.81753830	0.70140277		39.00000000	0.88051282	7.76395552	0.853913
40	0.08935326	8.81148050	0.78733447		40.00000000	0.85850000	7.56465601	0.875312
41	0.09950703	8.80666920	0.87632553		41.00000000	0.83756098	7.37612245	0.896662
42	0.10932662	8.82195570	0.96447460		42.00000000	0.81761905	7.21299902	0.918041
43	0.11947890	8.81644730	1.05337943		43.00000000	0.79860465	7.04085582	0.939523
44	0.12929699	8.80852890	1.13891627		44.00000000	0.78045455	6.87465642	0.960893
45	0.13946417	8.81678580	1.22962571		45.00000000	0.76311111	6.72818721	0.982252
46	0.14926291	8.81547930	1.31582409		46.00000000	0.74652174	6.58094694	1.003634
47	0.15941668	8.81485370	1.40523471		47.00000000	0.73063830	6.44046970	1.025120
48	0.16952431	8.81100370	1.49367932		48.00000000	0.71541667	6.30353890	1.046510
49	0.17936473	8.81798080	1.58163475		49.00000000	0.70081633	6.17978491	1.067869
50	0.18948501	8.81041430	1.66944144		50.00000000	0.68680000	6.05099254	1.089226
51	0.19929565	8.81279090	1.75635089		51.00000000	0.67333333	5.93394587	1.110695
52	0.20944199	8.80834010	1.84483628		52.00000000	0.66038462	5.81689229	1.132082
53	0.21925414	8.82151030	1.93415265		53.00000000	0.64792453	5.71567290	1.153458
54	0.22940046	8.81292440	2.02168891		54.00000000	0.63592593	5.60436711	1.174822
55	0.23922972	8.80600360	2.10665778		55.00000000	0.62436364	5.49814843	1.196298
56	0.24938200	8.81214140	2.19758945		56.00000000	0.61321429	5.40373099	1.217687
57	0.25953579	8.81186100	2.28699331		57.00000000	0.60245614	5.30875977	1.239062
58	0.26935983	8.80421640	2.37150223		58.00000000	0.59206897	5.21270330	1.260551
59	0.27951062	8.81253340	2.46319667		59.00000000	0.58203390	5.12919317	1.281943
60	0.28931755	8.80654620	2.54788837		60.00000000	0.57233333	5.04027994	1.303289
61	0.29945496	8.80688670	2.63726590		61.00000000	0.56295082	4.95784409	1.324657
62	0.30928123	8.80416770	2.72296382		62.00000000	0.55387097	4.87637288	1.346134
63	0.31944990	8.81600670	2.81627246		63.00000000	0.54507937	4.80542333	1.367513
64	0.32927021	8.81020740	2.90093884		64.00000000	0.53656250	4.72722691	1.388863
65	0.33941284	8.80189320	2.98747557		65.00000000	0.52830769	4.65010788	1.410238
66	0.34921455	8.80737400	3.07566315		66.00000000	0.52030303	4.58250338	1.431714
67	0.35940033	8.80896280	3.16594414		67.00000000	0.51253731	4.51492213	1.453071
68	0.36954293	8.80237100	3.25285397		68.00000000	0.50500000	4.44519736	1.474427
69	0.37935582	8.80374910	3.33975346		69.00000000	0.49768116	4.38146006	1.495800
70	0.38954532	8.80819990	3.43119305		70.00000000	0.49057143	4.32105121	1.517284
71	0.39936191	8.79872420	3.51387530		71.00000000	0.48366197	4.25560830	1.538669
72	0.40950304	8.80099580	3.60403454		72.00000000	0.47694444	4.19758605	1.560015
73	0.41928989	8.78966620	3.68541817		73.00000000	0.47041096	4.13475531	1.581404
74	0.42943546	8.78848270	3.77408611		74.00000000	0.46405405	4.07833103	1.602890
75	0.43926546	8.79280850	3.86237707		75.00000000	0.45786667	4.02593392	1.624274
76	0.44945347	8.78227140	3.94722236		76.00000000	0.45184211	3.96820000	1.645632
77	0.45954102	8.76849560	4.02948341		77.00000000	0.44597403	3.91052128	1.667004
78	0.46942312	8.76296520	4.11353846		78.00000000	0.44025641	3.85795160	1.688474
79	0.47958359	8.74863910	4.19570375		79.00000000	0.43468354	3.80288945	1.709858
80	0.48937562	8.72133920	4.26801078		80.00000000	0.42925000	3.74363485	1.731212
81	0.49951079	8.69775580	4.34462287		81.00000000	0.42395062	3.68741894	1.752573
82	0.50929838	8.65849880	4.40975941		82.00000000	0.41878049	3.62601035	1.774056
83	0.51945138	8.60100360	4.46780319		83.00000000	0.41373494	3.55853571	1.795425
84	0.52924347	8.52336790	4.51093680		84.00000000	0.40880952	3.48443397	1.816800
85	0.53935403	8.42092320	4.54185886		85.00000000	0.40400000	3.40205297	1.838138
86	0.54951823	8.24177840	4.52900748		86.00000000	0.39930233	3.29096128	1.859612
87	0.55929542	8.03835680	4.49581614		87.00000000	0.39471264	3.17284106	1.881003
88	0.56943727	7.74280740	4.40904311		88.00000000	0.39022727	3.02145461	1.902391
89	0.57921517	7.32542370	4.24299653		89.00000000	0.38584270	2.82646123	1.923863
90	0.58937114	6.78431940	3.99848206		90.00000000	0.38155556	2.58859476	1.945246
91	0.59912378	6.08704040	3.64689065		91.00000000	0.37736264	2.29702162	1.966593
92	0.60927904	5.17164230	3.15097326		92.00000000	0.37326087	1.93037170	1.988060
93	0.61909115	4.06086110	2.51404317		93.00000000	0.36924731	1.49946204	2.009579
94	0.62916380	2.68500140	1.68930568		94.00000000	0.36531915	0.98088243	2.031007
95	0.63920522	1.03973660	0.66460506		95.00000000	0.36147368	0.37583742	2.052370
96	0.64898533	-0.80779350	-0.52424613		96.00000000	0.35770833	-0.28895447	2.073752
97	0.65911680	-3.01321790	-1.98606254		97.00000000	0.35402062	-1.06674126	2.095241
98	0.66885674	-5.44940810	-3.64487334		98.00000000	0.35040816	-1.90951708	2.116632
99	0.67912734	-8.33316900	-5.65928290		99.00000000	0.34686869	-2.89051539	2.137990
100	0.68446696	-9.99857430	-6.84369376		100.00000000	0.34340000	-3.43351041	2.159353
101	0.68446922	-10.00037300	-6.84494751		101.00000000	0.34000000	-3.40012682	2.180824
02:51 03/04/2018
Test Lot:	JK-PERC
Recipe:	Recipe_YJX-LID
Cell Name:	1-2-12h
Test Order:	3
Test Condition:	Light
1	-0.29982668	8.81774900	-2.64379641		1.00000000	34.34000000	302.80150066	0.000000
2	-0.29001501	8.80994610	-2.55501661		2.00000000	17.17000000	151.26677454	0.061745
3	-0.27991229	8.81382080	-2.46709676		3.00000000	11.44666667	100.88886876	0.083241
4	-0.27007979	8.81008240	-2.37942520		4.00000000	8.58500000	75.63455740	0.104682
5	-0.25991455	8.81468390	-2.29106460		5.00000000	6.86800000	60.53924903	0.126039
6	-0.24974634	8.80921360	-2.20006885		6.00000000	5.72333333	50.41806584	0.147407
7	-0.23991084	8.81792450	-2.11551567		7.00000000	4.90571429	43.25821819	0.168899
8	-0.22979400	8.81087210	-2.02468554		8.00000000	4.29250000	37.82066849	0.190324
9	-0.21995701	8.81595520	-1.93913115		9.00000000	3.81555556	33.63776684	0.211683
10	-0.20983271	8.81575010	-1.84983273		10.00000000	3.43400000	30.27328584	0.233071
11	-0.19999869	8.80890460	-1.76176938		11.00000000	3.12181818	27.49979854	0.254564
12	-0.18985951	8.81594370	-1.67379075		12.00000000	2.86166667	25.22829222	0.275943
13	-0.18008059	8.81644730	-1.58767103		13.00000000	2.64153846	23.28898464	0.297315
14	-0.16994067	8.80717090	-1.49669652		14.00000000	2.45285714	21.60273205	0.318692
15	-0.16009921	8.80687050	-1.40997301		15.00000000	2.28933333	20.16186220	0.340155
16	-0.14994961	8.81469350	-1.32175985		16.00000000	2.14625000	18.91853592	0.361542
17	-0.13980596	8.82345960	-1.23357224		17.00000000	2.02000000	17.82338839	0.382886
18	-0.12998535	8.80922510	-1.14507021		18.00000000	1.90777778	16.80604389	0.404253
19	-0.11984020	8.80998420	-1.05579027		19.00000000	1.80736842	15.92288723	0.425742
20	-0.11002481	8.81278610	-0.96962512		20.00000000	1.71700000	15.13155373	0.447120
21	-0.09987446	8.81382270	-0.88027577		21.00000000	1.63523810	14.41269864	0.468484
22	-0.09004790	8.80455590	-0.79283173		22.00000000	1.56090909	13.74311135	0.489865
23	-0.07991467	8.81510450	-0.70445614		23.00000000	1.49304348	13.16133428	0.511327
24	-0.07006949	8.81200500	-0.61745271		24.00000000	1.43083333	12.60851049	0.532718
25	-0.05991840	8.82231520	-0.52861901		25.00000000	1.37360000	12.11833216	0.554074
26	-0.04979113	8.81185820	-0.43875235		26.00000000	1.32076923	11.63843118	0.575448
27	-0.03996531	8.81093030	-0.35213152		27.00000000	1.27185185	11.20619802	0.596921
28	-0.02978816	8.81728840	-0.26265082		28.00000000	1.22642857	10.81377442	0.618285
29	-0.01997425	8.81081870	-0.17598950		29.00000000	1.18413793	10.43322463	0.639648
30	-0.00982763	8.80960370	-0.08657749		30.00000000	1.14466667	10.08405970	0.661028
31	-0.00064713	8.80321220	-0.00569685		31.00000000	1.10774194	9.75168732	0.682633
32	0.00950077	8.81038480	0.08370547		32.00000000	1.07312500	9.45464419	0.704032
33	0.01931217	8.81485370	0.17023398		33.00000000	1.04060606	9.17279018	0.725420
34	0.02946744	8.81079200	0.25963149		34.00000000	1.01000000	8.89889992	0.746765
35	0.03927884	8.80807210	0.34597088		35.00000000	0.98114286	8.64197703	0.768230
36	0.04943634	8.80549530	0.43531148		36.00000000	0.95388889	8.39946413	0.789611
37	0.05925593	8.81022640	0.52205814		37.00000000	0.92810811	8.17684256	0.810995
38	0.06940226	8.81210230	0.61157984		38.00000000	0.90368421	7.96335771	0.832476
39	0.07952255	8.80847070	0.70047205		39.00000000	0.88051282	7.75597138	0.853867
40	0.08936521	8.81417270	0.78768043		40.00000000	0.85850000	7.56696726	0.875202
41	0.09950262	8.80267140	0.87588883		41.00000000	0.83756098	7.37277405	0.896584
42	0.10932741	8.81021120	0.96319757		42.00000000	0.81761905	7.20339649	0.918074
43	0.11946407	8.80303190	1.05164602		43.00000000	0.79860465	7.03014222	0.939459
44	0.12929036	8.81101420	1.13917920		44.00000000	0.78045455	6.87659608	0.960824
45	0.13941957	8.80650140	1.22779864		45.00000000	0.76311111	6.72033907	0.982205
46	0.14923619	8.80463410	1.31397005		46.00000000	0.74652174	6.57285076	1.003673
47	0.15939070	8.82729340	1.40698847		47.00000000	0.73063830	6.44955862	1.025060
48	0.16953333	8.79449270	1.49095963		48.00000000	0.71541667	6.29172665	1.046417
49	0.17936854	8.81860540	1.58178038		49.00000000	0.70081633	6.18022264	1.067800
50	0.18951264	8.80080130	1.66786309		50.00000000	0.68680000	6.04439033	1.089283
51	0.19927567	8.81384940	1.75638574		51.00000000	0.67333333	5.93465860	1.110661
52	0.20945475	8.81714820	1.84679357		52.00000000	0.66038462	5.82270902	1.132020
53	0.21927509	8.81050300	1.93192384		53.00000000	0.64792453	5.70854100	1.153396
54	0.22941844	8.80855560	2.02084508		54.00000000	0.63592593	5.60158888	1.174872
55	0.23923506	8.80998230	2.10765664		55.00000000	0.62436364	5.50063259	1.196270
56	0.24940073	8.81534770	2.19855415		56.00000000	0.61321429	5.40569714	1.217621
57	0.25953218	8.79309460	2.28209101		57.00000000	0.60245614	5.29745383	1.238991
58	0.26937112	8.81043820	2.37327761		58.00000000	0.59206897	5.21638703	1.260477
59	0.27948993	8.80621430	2.46124822		59.00000000	0.58203390	5.12551524	1.281857
60	0.28932366	8.79943940	2.54588601		60.00000000	0.57233333	5.03621248	1.303229
61	0.29949975	8.81641390	2.64051376		61.00000000	0.56295082	4.96320743	1.324601
62	0.30930817	8.80002980	2.72192111		62.00000000	0.55387097	4.87408102	1.346081
63	0.31946495	8.81622220	2.81647398		63.00000000	0.54507937	4.80554080	1.367468
64	0.32928377	8.80542660	2.89948407		64.00000000	0.53656250	4.72466171	1.388858
65	0.33941522	8.81623550	2.99236451		65.00000000	0.52830769	4.65768503	1.410196
66	0.34924674	8.80055240	3.07356424		66.00000000	0.52030303	4.57895408	1.431675
67	0.35940051	8.81523800	3.16820103		67.00000000	0.51253731	4.51813840	1.453066
68	0.36953717	8.80541710	3.25392892		68.00000000	0.50500000	4.44673564	1.474452
69	0.37935379	8.79703140	3.33718720		69.00000000	0.49768116	4.37811679	1.495949
70	0.38952243	8.79149250	3.42448352		70.00000000	0.49057143	4.31285504	1.517318
71	0.39934501	8.81021310	3.51831464		71.00000000	0.48366197	4.26116504	1.538678
72	0.40951070	8.78614040	3.59801851		72.00000000	0.47694444	4.19050085	1.560060
73	0.41932583	8.79932590	3.68978464		73.00000000	0.47041096	4.13929933	1.581530
74	0.42944834	8.79806900	3.77831613		74.00000000	0.46405405	4.08277959	1.602908
75	0.43927684	8.77880480	3.85632563		75.00000000	0.45786667	4.01952209	1.624281
76	0.44944179	8.78533650	3.94849736		76.00000000	0.45184211	3.96958494	1.645661
77	0.45955613	8.76582430	4.02838829		77.00000000	0.44597403	3.90932995	1.667144
78	0.46941441	8.77190880	4.11766039		78.00000000	0.44025641	3.86188908	1.688525
79	0.47953248	8.74629970	4.19413479		79.00000000	0.43468354	3.80187255	1.709871
80	0.48937142	8.72977160	4.27210072		80.00000000	0.42925000	3.74725446	1.731256
81	0.49952742	8.68518640	4.33848875		81.00000000	0.42395062	3.68209014	1.752740
82	0.50931871	8.67091850	4.41626102		82.00000000	0.41878049	3.63121148	1.774119
83	0.51943457	8.59784510	4.46601797		83.00000000	0.41373494	3.55722892	1.795485
84	0.52922511	8.52385900	4.51104022		84.00000000	0.40880952	3.48463474	1.816859
85	0.53938264	8.41310790	4.53788435		85.00000000	0.40400000	3.39889559	1.838328
86	0.54949695	8.27026370	4.54448468		86.00000000	0.39930233	3.30233553	1.859714
87	0.55931801	8.04949860	4.50222954		87.00000000	0.39471264	3.17723887	1.881055
88	0.56942862	7.74352880	4.40938692		88.00000000	0.39022727	3.02173612	1.902423
89	0.57926756	7.35034040	4.25781375		89.00000000	0.38584270	2.83607516	1.923937
90	0.58937001	6.79774570	4.00638745		90.00000000	0.38155556	2.59371764	1.945322
91	0.59912407	6.11124130	3.66139176		91.00000000	0.37736264	2.30615413	1.966701
92	0.60927188	5.19231750	3.16353304		92.00000000	0.37326087	1.93808895	1.988174
93	0.61906695	4.09245780	2.53350537		93.00000000	0.36924731	1.51112904	2.009701
94	0.62923557	2.70635510	1.70293489		94.00000000	0.36531915	0.98868334	2.031099
95	0.63925391	1.04181170	0.66598220		95.00000000	0.36147368	0.37658751	2.052499
96	0.64905041	-0.82852393	-0.53775380		96.00000000	0.35770833	-0.29636991	2.073852
97	0.65910518	-3.03649190	-2.00136754		97.00000000	0.35402062	-1.07498074	2.095332
98	0.66883922	-5.52616740	-3.69611749		98.00000000	0.35040816	-1.93641417	2.116705
99	0.67910832	-8.45791910	-5.74384323		99.00000000	0.34686869	-2.93378729	2.138088
100	0.68400288	-9.99941830	-6.83963092		100.00000000	0.34340000	-3.43380024	2.159576
101	0.68393070	-10.00042200	-6.83959562		101.00000000	0.34000000	-3.40014348	2.180995
02:52 03/04/2018
Test Lot:	JK-PERC
Recipe:	Recipe_YJX-LID
Cell Name:	1-2-12h
Test Order:	4
Test Condition:	Light
1	-0.29980144	8.80897140	-2.64094231		1.00000000	34.34000000	302.50007788	0.000000
2	-0.29000106	8.80385490	-2.55312725		2.00000000	17.17000000	151.16218863	0.061728
3	-0.27985457	8.81671140	-2.46739698		3.00000000	11.44666667	100.92195649	0.083253
4	-0.27002066	8.81518080	-2.38028094		4.00000000	8.58500000	75.67832717	0.104654
5	-0.25992775	8.80185700	-2.28784689		5.00000000	6.86800000	60.45115388	0.126076
6	-0.24969715	8.81583690	-2.20128935		6.00000000	5.72333333	50.45597319	0.147464
7	-0.23990569	8.80878260	-2.11327707		7.00000000	4.90571429	43.21337064	0.168961
8	-0.22972940	8.80914120	-2.02371872		8.00000000	4.29250000	37.81323860	0.190346
9	-0.21989551	8.81971170	-1.93941500		9.00000000	3.81555556	33.65209998	0.211683
10	-0.20978846	8.80857370	-1.84793711		10.00000000	3.43400000	30.24864209	0.233066
11	-0.19993001	8.80161860	-1.75970769		11.00000000	3.12181818	27.47705297	0.254546
12	-0.18976936	8.81208320	-1.67226339		12.00000000	2.86166667	25.21724476	0.275934
13	-0.17999054	8.80959220	-1.58564326		13.00000000	2.64153846	23.27087663	0.297282
14	-0.16987084	8.81126790	-1.49677748		14.00000000	2.45285714	21.61278141	0.318653
15	-0.16006225	8.81118770	-1.41033853		15.00000000	2.28933333	20.17174571	0.340130
16	-0.14988004	8.80750470	-1.32006916		16.00000000	2.14625000	18.90310696	0.361507
17	-0.13976181	8.81435680	-1.23191046		17.00000000	2.02000000	17.80500074	0.382853
18	-0.12993982	8.81332490	-1.14520185		18.00000000	1.90777778	16.81386539	0.404243
19	-0.11978365	8.81483550	-1.05587317		19.00000000	1.80736842	15.93165532	0.425719
20	-0.10992669	8.81003090	-0.96845754		20.00000000	1.71700000	15.12682306	0.447089
21	-0.09977497	8.80375290	-0.87839420		21.00000000	1.63523810	14.39623212	0.468449
22	-0.08999839	8.81410120	-0.79325495		22.00000000	1.56090909	13.75801069	0.489817
23	-0.07984594	8.80424020	-0.70298286		23.00000000	1.49304348	13.14511341	0.511295
24	-0.07002693	8.81768890	-0.61747572		24.00000000	1.43083333	12.61664320	0.532680
25	-0.05985140	8.80620570	-0.52706378		25.00000000	1.37360000	12.09620415	0.554033
26	-0.04971309	8.81662750	-0.43830180		26.00000000	1.32076923	11.64473032	0.575408
27	-0.03993354	8.81025600	-0.35182468		27.00000000	1.27185185	11.20534041	0.596878
28	-0.02976768	8.81793120	-0.26248935		28.00000000	1.22642857	10.81456276	0.618261
29	-0.01995910	8.80999090	-0.17583945		29.00000000	1.18413793	10.43224440	0.639659
30	-0.00979547	8.80840020	-0.08628246		30.00000000	1.14466667	10.08268210	0.661008
31	-0.00062254	8.80693050	-0.00548263		31.00000000	1.10774194	9.75580624	0.682598
32	0.00952674	8.81094360	0.08393953		32.00000000	1.07312500	9.45524385	0.703982
33	0.01933504	8.80566880	0.17025795		33.00000000	1.04060606	9.16323232	0.725362
34	0.02945967	8.81494900	0.25968547		34.00000000	1.01000000	8.90309849	0.746838
35	0.03927839	8.80311390	0.34577216		35.00000000	0.98114286	8.63711232	0.768231
36	0.04941642	8.81399250	0.43555595		36.00000000	0.95388889	8.40756951	0.789567
37	0.05926566	8.80303380	0.52171759		37.00000000	0.92810811	8.17016705	0.810938
38	0.06940294	8.80845740	0.61133285		38.00000000	0.90368421	7.96006387	0.832417
39	0.07955808	8.81185340	0.70105416		39.00000000	0.88051282	7.75894989	0.853807
40	0.08937606	8.81642060	0.78797695		40.00000000	0.85850000	7.56889709	0.875174
41	0.09951707	8.81431480	0.87717478		41.00000000	0.83756098	7.38252610	0.896549
42	0.10932388	8.81518460	0.96371018		42.00000000	0.81761905	7.20746284	0.918020
43	0.11953485	8.80946160	1.05303767		43.00000000	0.79860465	7.03527701	0.939405
44	0.12933050	8.80551340	1.13882145		44.00000000	0.78045455	6.87230296	0.960746
45	0.13948119	8.79809860	1.22716926		45.00000000	0.76311111	6.71392680	0.982123
46	0.14930512	8.81969360	1.31682541		46.00000000	0.74652174	6.58409300	1.003610
47	0.15945207	8.80201720	1.40349986		47.00000000	0.73063830	6.43109086	1.024986
48	0.16960275	8.80455880	1.49327739		48.00000000	0.71541667	6.29892811	1.046333
49	0.17944679	8.80421350	1.57988785		49.00000000	0.70081633	6.17013656	1.067720
50	0.18954685	8.80329230	1.66863633		50.00000000	0.68680000	6.04610115	1.089199
51	0.19936706	8.80369090	1.75516597		51.00000000	0.67333333	5.92781854	1.110578
52	0.20947605	8.80423830	1.84427706		52.00000000	0.66038462	5.81418352	1.131949
53	0.21930148	8.81516270	1.93317823		53.00000000	0.64792453	5.71156013	1.153324
54	0.22946928	8.79996970	2.01932271		54.00000000	0.63592593	5.59612888	1.174792
55	0.23930065	8.79794690	2.10535441		55.00000000	0.62436364	5.49311812	1.196167
56	0.24941041	8.81392960	2.19828580		56.00000000	0.61321429	5.40482754	1.217527
57	0.25959012	8.79694560	2.28360016		57.00000000	0.60245614	5.29977389	1.238910
58	0.26938203	8.81038000	2.37335805		58.00000000	0.59206897	5.21635257	1.260387
59	0.27954909	8.80735590	2.46208833		59.00000000	0.58203390	5.12617969	1.281767
60	0.28934029	8.80266280	2.54696501		60.00000000	0.57233333	5.03805734	1.303155
61	0.29952297	8.79956720	2.63567250		61.00000000	0.56295082	4.95372357	1.324495
62	0.30933946	8.80451870	2.72358506		62.00000000	0.55387097	4.87656729	1.345965
63	0.31948194	8.79702760	2.81049144		63.00000000	0.54507937	4.79507822	1.367362
64	0.32930514	8.81079670	2.90144064		64.00000000	0.53656250	4.72754310	1.388744
65	0.33942828	8.81270410	2.99128099		65.00000000	0.52830769	4.65581937	1.410225
66	0.34927008	8.79527660	3.07192696		66.00000000	0.52030303	4.57620907	1.431602
67	0.35939693	8.79932690	3.16245107		67.00000000	0.51253731	4.50998337	1.452952
68	0.36954761	8.79495330	3.25015397		68.00000000	0.50500000	4.44145142	1.474326
69	0.37939835	8.80381300	3.34015213		69.00000000	0.49768116	4.38149186	1.495803
70	0.38954082	8.79650500	3.42659777		70.00000000	0.49057143	4.31531402	1.517180
71	0.39933574	8.78740310	3.50912412		71.00000000	0.48366197	4.25013271	1.538526
72	0.40952140	8.80702690	3.60666599		72.00000000	0.47694444	4.20046255	1.559894
73	0.41931111	8.77044490	3.67754499		73.00000000	0.47041096	4.12571340	1.581385
74	0.42950642	8.79918860	3.77930799		74.00000000	0.46405405	4.08329914	1.602761
75	0.43931845	8.78058150	3.85747145		75.00000000	0.45786667	4.02033558	1.624124
76	0.44945574	8.77168850	3.94248575		76.00000000	0.45184211	3.96341820	1.645490
77	0.45956475	8.76892950	4.02989089		77.00000000	0.44597403	3.91071479	1.666979
78	0.46945044	8.75715920	4.11105224		78.00000000	0.44025641	3.85539547	1.688367
79	0.47960782	8.74310110	4.19325966		79.00000000	0.43468354	3.80048217	1.709709
80	0.48942134	8.72719100	4.27127351		80.00000000	0.42925000	3.74614674	1.731096
81	0.49955267	8.69361110	4.34291664		81.00000000	0.42395062	3.68566179	1.752575
82	0.50937510	8.66793440	4.41522995		82.00000000	0.41878049	3.62996180	1.773951
83	0.51951164	8.59463120	4.46501095		83.00000000	0.41373494	3.55589922	1.795305
84	0.52929914	8.52594280	4.51277419		84.00000000	0.40880952	3.48548662	1.816670
85	0.53941333	8.40930270	4.53608997		85.00000000	0.40400000	3.39735829	1.838144
86	0.54953718	8.26293370	4.54078928		86.00000000	0.39930233	3.29940864	1.859509
87	0.55939168	8.04399300	4.49974276		87.00000000	0.39471264	3.17506574	1.880872
88	0.56948280	7.73559570	4.40528870		88.00000000	0.39022727	3.01864041	1.902250
89	0.57929182	7.35050580	4.25808788		89.00000000	0.38584270	2.83613898	1.923727
90	0.58941722	6.79480270	4.00497372		90.00000000	0.38155556	2.59259472	1.945106
91	0.59918237	6.10791870	3.65975720		91.00000000	0.37736264	2.30490031	1.966497
92	0.60930473	5.19092890	3.16285753		92.00000000	0.37326087	1.93757064	1.987957
93	0.61908549	4.08650830	2.52989799		93.00000000	0.36924731	1.50893220	2.009469
94	0.62922651	2.69975470	1.69875723		94.00000000	0.36531915	0.98627209	2.030857
95	0.63928264	1.05148120	0.67219368		95.00000000	0.36147368	0.38008278	2.052248
96	0.64905077	-0.84000814	-0.54520793		96.00000000	0.35770833	-0.30047791	2.073789
97	0.65914118	-3.05175470	-2.01153719		97.00000000	0.35402062	-1.08038409	2.095172
98	0.66887802	-5.55050040	-3.71260772		98.00000000	0.35040816	-1.94494065	2.116530
99	0.67912918	-8.48878000	-5.76497820		99.00000000	0.34686869	-2.94449197	2.137963
100	0.68393213	-9.99946210	-6.83895341		100.00000000	0.34340000	-3.43381529	2.159447
101	0.68392617	-10.00030300	-6.83946893		101.00000000	0.34000000	-3.40010302	2.180828
