# Supplementary material for: Study on the Electrical Injection Regeneration of Industrialized B-Doped Czochralski Silicon PERC Solar Cells
Source: Hindawi journal article supplement (doi:10.1155/2019/5357370), 2019-06-20
Supplement: f1 [file 5357370.f1.zip › section3.1/IVRawData_1-10-10h.csv]

00:50 03/04/2018
Test Lot:	JK-PERC
Recipe:	Recipe_YJX-LID
Cell Name:	1-10-10h
Test Order:	2
Test Condition:	Light
1	-0.29984736	8.93387030	-2.67879742		1.00000000	34.34000000	306.78910610	0.000000
2	-0.29011038	8.92231750	-2.58845692		2.00000000	17.17000000	153.19619148	0.061786
3	-0.27996552	8.92818830	-2.49958488		3.00000000	11.44666667	102.19799541	0.083208
4	-0.27013031	8.93385410	-2.41330478		4.00000000	8.58500000	76.69713745	0.104699
5	-0.25996757	8.92897800	-2.32124471		5.00000000	6.86800000	61.32422090	0.126083
6	-0.24979295	8.92242050	-2.22875774		6.00000000	5.72333333	51.06598666	0.147460
7	-0.24000610	8.92863080	-2.14292586		7.00000000	4.90571429	43.80131167	0.168825
8	-0.22982255	8.93077850	-2.05249429		8.00000000	4.29250000	38.33536671	0.190307
9	-0.22000815	8.92409990	-1.96337471		9.00000000	3.81555556	34.05039895	0.211670
10	-0.20988935	8.93163110	-1.87465425		10.00000000	3.43400000	30.67122120	0.233117
11	-0.20007125	8.92829320	-1.78629478		11.00000000	3.12181818	27.87250804	0.254522
12	-0.18988396	8.92608740	-1.69492082		12.00000000	2.86166667	25.54348678	0.275992
13	-0.18010977	8.93729210	-1.60969362		13.00000000	2.64153846	23.60820082	0.297379
14	-0.16996269	8.92507460	-1.51692969		14.00000000	2.45285714	21.89193298	0.318797
15	-0.16016616	8.92400650	-1.42932385		15.00000000	2.28933333	20.43002555	0.340274
16	-0.15002130	8.93397050	-1.34028587		16.00000000	2.14625000	19.17453419	0.361646
17	-0.13985263	8.91458700	-1.24672844		17.00000000	2.02000000	18.00746574	0.382986
18	-0.12999657	8.92077350	-1.15966996		18.00000000	1.90777778	17.01885344	0.404353
19	-0.11985320	8.93455510	-1.07083502		19.00000000	1.80736842	16.14803274	0.425841
20	-0.11005370	8.92985060	-0.98276310		20.00000000	1.71700000	15.33255348	0.447210
21	-0.09987237	8.92591860	-0.89145267		21.00000000	1.63523810	14.59600213	0.468573
22	-0.09009223	8.93253040	-0.80475156		22.00000000	1.56090909	13.94286791	0.489953
23	-0.07993770	8.92655280	-0.71356806		23.00000000	1.49304348	13.32773144	0.511415
24	-0.07011289	8.92245390	-0.62557904		24.00000000	1.43083333	12.76654446	0.532809
25	-0.05990924	8.92917160	-0.53493985		25.00000000	1.37360000	12.26511011	0.554160
26	-0.04983137	8.93034080	-0.44501110		26.00000000	1.32076923	11.79491935	0.575524
27	-0.03995372	8.93238070	-0.35688180		27.00000000	1.27185185	11.36066493	0.597008
28	-0.02978579	8.92248730	-0.26576332		28.00000000	1.22642857	10.94279335	0.618379
29	-0.01999224	8.92886070	-0.17850795		29.00000000	1.18413793	10.57300264	0.639731
30	-0.00984888	8.92272760	-0.08787885		30.00000000	1.14466667	10.21354886	0.661113
31	-0.00067087	8.92128750	-0.00598504		31.00000000	1.10774194	9.88248428	0.682709
32	0.00945815	8.92778110	0.08444027		32.00000000	1.07312500	9.58062509	0.704150
33	0.01924844	8.92401790	0.17177338		33.00000000	1.04060606	9.28638711	0.725505
34	0.02937365	8.92435170	0.26214078		34.00000000	1.01000000	9.01359522	0.746885
35	0.03929121	8.93483160	0.35106034		35.00000000	0.98114286	8.76634620	0.768360
36	0.04935316	8.92845730	0.44064758		36.00000000	0.95388889	8.51675621	0.789740
37	0.05913452	8.92359730	0.52769262		37.00000000	0.92810811	8.28206301	0.811127
38	0.06928355	8.93308830	0.61891609		38.00000000	0.90368421	8.07269085	0.832484
39	0.07952859	8.92212870	0.70956434		39.00000000	0.88051282	7.85604871	0.853964
40	0.08927869	8.93460180	0.79766955		40.00000000	0.85850000	7.67035565	0.875339
41	0.09945303	8.92398450	0.88751732		41.00000000	0.83756098	7.47438116	0.896738
42	0.10923588	8.93557450	0.97608534		42.00000000	0.81761905	7.30589591	0.918130
43	0.11944593	8.91885280	1.06532067		43.00000000	0.79860465	7.12263733	0.939599
44	0.12928088	8.92438700	1.15375260		44.00000000	0.78045455	6.96507840	0.960977
45	0.13936740	8.92826650	1.24430929		45.00000000	0.76311111	6.81325937	0.982362
46	0.14916810	8.92326350	1.33106626		46.00000000	0.74652174	6.66141019	1.003836
47	0.15933500	8.92736720	1.42244205		47.00000000	0.73063830	6.52267638	1.025221
48	0.16946095	8.93121910	1.51349287		48.00000000	0.71541667	6.38954300	1.046581
49	0.17933981	8.92169670	1.60001539		49.00000000	0.70081633	6.25247071	1.067959
50	0.18947694	8.93650720	1.69326204		50.00000000	0.68680000	6.13759314	1.089433
51	0.19927616	8.91877080	1.77729840		51.00000000	0.67333333	6.00530567	1.110810
52	0.20942520	8.92652130	1.86943851		52.00000000	0.66038462	5.89493734	1.132164
53	0.21925269	8.92793460	1.95747368		53.00000000	0.64792453	5.78462781	1.153543
54	0.22939800	8.92116450	2.04649729		54.00000000	0.63592593	5.67319980	1.175018
55	0.23916000	8.93996330	2.13808162		55.00000000	0.62436364	5.58178799	1.196402
56	0.24935444	8.91509820	2.22301932		56.00000000	0.61321429	5.46686557	1.217751
57	0.25950721	8.92373090	2.31577251		57.00000000	0.60245614	5.37615648	1.239124
58	0.26936671	8.92629910	2.40444782		58.00000000	0.59206897	5.28498467	1.260610
59	0.27947927	8.93031790	2.49583873		59.00000000	0.58203390	5.19774774	1.281981
60	0.28928667	8.92595860	2.58216084		60.00000000	0.57233333	5.10862364	1.303377
61	0.29946250	8.93225000	2.67487392		61.00000000	0.56295082	5.02841746	1.324772
62	0.30924460	8.92837050	2.76105036		62.00000000	0.55387097	4.94516521	1.346249
63	0.31937352	8.92209720	2.84948159		63.00000000	0.54507937	4.86325108	1.367635
64	0.32928216	8.93257240	2.94133673		64.00000000	0.53656250	4.79288338	1.388976
65	0.33937910	8.92475410	3.02887501		65.00000000	0.52830769	4.71501624	1.410340
66	0.34918502	8.92750550	3.11735119		66.00000000	0.52030303	4.64500816	1.431820
67	0.35931394	8.90891170	3.20109616		67.00000000	0.51253731	4.56614967	1.453195
68	0.36949870	8.94108490	3.30371925		68.00000000	0.50500000	4.51524787	1.474588
69	0.37924060	8.91859250	3.38229237		69.00000000	0.49768116	4.43861546	1.495965
70	0.38944325	8.92078400	3.47413911		70.00000000	0.49057143	4.37628175	1.517445
71	0.39928263	8.92257120	3.56262770		71.00000000	0.48366197	4.31550838	1.538820
72	0.40945178	8.91606240	3.65069762		72.00000000	0.47694444	4.25246643	1.560216
73	0.41925770	8.90420250	3.73315546		73.00000000	0.47041096	4.18863444	1.581555
74	0.42934719	8.92443850	3.83168259		74.00000000	0.46405405	4.14142187	1.603032
75	0.43918735	8.89827630	3.90801039		75.00000000	0.45786667	4.07422411	1.624420
76	0.44936764	8.90693090	4.00248652		76.00000000	0.45184211	4.02452641	1.645803
77	0.45950624	8.91411210	4.09609013		77.00000000	0.44597403	3.97546246	1.667286
78	0.46939552	8.88937660	4.17263355		78.00000000	0.44025641	3.91360503	1.688674
79	0.47949246	8.88025090	4.25801335		79.00000000	0.43468354	3.86009894	1.710021
80	0.48931995	8.87896440	4.34465442		80.00000000	0.42925000	3.81129547	1.731418
81	0.49947047	8.84281440	4.41672466		81.00000000	0.42395062	3.74891662	1.752907
82	0.50929725	8.82874770	4.49645692		82.00000000	0.41878049	3.69730727	1.774284
83	0.51940084	8.76341530	4.55172527		83.00000000	0.41373494	3.62573110	1.795638
84	0.52919936	8.73134040	4.62061975		84.00000000	0.40880952	3.56945511	1.817021
85	0.53934318	8.63823990	4.65897578		85.00000000	0.40400000	3.48984892	1.838498
86	0.54950410	8.53051190	4.68755126		86.00000000	0.39930233	3.40625324	1.859884
87	0.55928844	8.37445640	4.68373666		87.00000000	0.39471264	3.30550383	1.881225
88	0.56939954	8.15292640	4.64227254		88.00000000	0.39022727	3.18149423	1.902589
89	0.57926053	7.87642000	4.56249922		89.00000000	0.38584270	3.03905913	1.924074
90	0.58933288	7.46498390	4.39936046		90.00000000	0.38155556	2.84830608	1.945454
91	0.59917378	6.95138310	4.16508649		91.00000000	0.37736264	2.62319226	1.966814
92	0.60921341	6.27844670	3.82491392		92.00000000	0.37326087	2.34349847	1.988285
93	0.61905283	5.44575120	3.37120769		93.00000000	0.36924731	2.01082899	2.009786
94	0.62916833	4.39174180	2.76314485		94.00000000	0.36531915	1.60438738	2.031173
95	0.63930178	3.11978820	1.99448615		95.00000000	0.36147368	1.12772133	2.052523
96	0.64901835	1.62648060	1.05561576		96.00000000	0.35770833	0.58180566	2.073892
97	0.65914136	-0.16960815	-0.11179575		97.00000000	0.35402062	-0.06004478	2.095362
98	0.66890037	-2.19968530	-1.47137031		98.00000000	0.35040816	-0.77078769	2.116743
99	0.67894220	-4.62096830	-3.13737038		99.00000000	0.34686869	-1.60286921	2.138103
100	0.68882704	-7.33416180	-5.05196896		100.00000000	0.34340000	-2.51855116	2.159477
101	0.69741976	-9.99382020	-6.96988769		101.00000000	0.34000000	-3.39789887	2.180951
00:50 03/04/2018
Test Lot:	JK-PERC
Recipe:	Recipe_YJX-LID
Cell Name:	1-10-10h
Test Order:	3
Test Condition:	Light
1	-0.29984140	8.93715480	-2.67972901		1.00000000	34.34000000	306.90189583	0.000000
2	-0.29001957	8.92510800	-2.58845598		2.00000000	17.17000000	153.24410436	0.021585
3	-0.27986577	8.92773440	-2.49856726		3.00000000	11.44666667	102.19279977	0.042974
4	-0.27007967	8.92339230	-2.41002685		4.00000000	8.58500000	76.60732290	0.064328
5	-0.25996459	8.92619230	-2.32049392		5.00000000	6.86800000	61.30508872	0.085710
6	-0.24974158	8.94113350	-2.23297281		6.00000000	5.72333333	51.17308740	0.107193
7	-0.23994954	8.92372420	-2.14124352		7.00000000	4.90571429	43.77724129	0.128573
8	-0.22980468	8.93309780	-2.05286768		8.00000000	4.29250000	38.34532231	0.149952
9	-0.21998210	8.92929840	-1.96428581		9.00000000	3.81555556	34.07023412	0.171317
10	-0.20984916	8.93344210	-1.87467532		10.00000000	3.43400000	30.67744017	0.192800
11	-0.20002882	8.92742920	-1.78574313		11.00000000	3.12181818	27.86981079	0.214187
12	-0.18995170	8.94354150	-1.69884091		12.00000000	2.86166667	25.59343459	0.235620
13	-0.18008745	8.92202570	-1.60674486		13.00000000	2.64153846	23.56787404	0.256969
14	-0.16998948	8.92510410	-1.51717380		14.00000000	2.45285714	21.89200534	0.278450
15	-0.16012448	8.93031790	-1.42996251		15.00000000	2.28933333	20.44447445	0.299827
16	-0.15004811	8.92703820	-1.33948521		16.00000000	2.14625000	19.15965574	0.321218
17	-0.13985635	8.94402690	-1.25087896		17.00000000	2.02000000	18.06693434	0.342710
18	-0.12999955	8.92110920	-1.15974018		18.00000000	1.90777778	17.01949388	0.364081
19	-0.11985990	8.93001370	-1.07035055		19.00000000	1.80736842	16.13982476	0.385440
20	-0.11003956	8.93022920	-0.98267849		20.00000000	1.71700000	15.33320354	0.406819
21	-0.09991033	8.92129800	-0.89132986		21.00000000	1.63523810	14.58844635	0.428303
22	-0.09009074	8.94009400	-0.80541966		22.00000000	1.56090909	13.95467400	0.449701
23	-0.07996077	8.92469880	-0.71362580		23.00000000	1.49304348	13.32496334	0.471050
24	-0.07010619	8.93202500	-0.62619027		24.00000000	1.43083333	12.78023910	0.492425
25	-0.06000004	8.91890810	-0.53513484		25.00000000	1.37360000	12.25101217	0.513914
26	-0.04980904	8.91627790	-0.44411123		26.00000000	1.32076923	11.77634550	0.535292
27	-0.03996637	8.93279080	-0.35701123		27.00000000	1.27185185	11.36118652	0.556649
28	-0.02983194	8.92133810	-0.26614078		28.00000000	1.22642857	10.94138394	0.578041
29	-0.02002648	8.92088410	-0.17865393		29.00000000	1.18413793	10.56355724	0.599524
30	-0.00985855	8.93819140	-0.08811764		30.00000000	1.14466667	10.23124976	0.620924
31	-0.00071776	8.91993900	-0.00640240		31.00000000	1.10774194	9.88099049	0.642390
32	0.00941572	8.92837520	0.08406710		32.00000000	1.07312500	9.58126264	0.663768
33	0.01928416	8.92805480	0.17217005		33.00000000	1.04060606	9.29058793	0.685239
34	0.02945478	8.92042160	0.26274903		34.00000000	1.01000000	9.00962582	0.706610
35	0.03923092	8.93100830	0.35037171		35.00000000	0.98114286	8.76259500	0.727965
36	0.04939112	8.93005370	0.44106536		36.00000000	0.95388889	8.51827900	0.749345
37	0.05921490	8.92660140	0.52858782		37.00000000	0.92810811	8.28485114	0.770824
38	0.06935053	8.92713170	0.61910134		38.00000000	0.90368421	8.06730796	0.792206
39	0.07956060	8.92758080	0.71028368		39.00000000	0.88051282	7.86084935	0.813586
40	0.08936949	8.92292120	0.79743693		40.00000000	0.85850000	7.66032785	0.834954
41	0.09950513	8.93152620	0.88873264		41.00000000	0.83756098	7.48069780	0.856428
42	0.10933486	8.92536640	0.97585369		42.00000000	0.81761905	7.29754958	0.877817
43	0.11945115	8.91997620	1.06550142		43.00000000	0.79860465	7.12353448	0.899197
44	0.12924962	8.92979910	1.15417314		44.00000000	0.78045455	6.96930230	0.920567
45	0.13934954	8.93175600	1.24463609		45.00000000	0.76311111	6.81592225	0.942049
46	0.14920011	8.91779800	1.33053644		46.00000000	0.74652174	6.65733007	0.963430
47	0.15936700	8.93624880	1.42414316		47.00000000	0.73063830	6.52916561	0.984828
48	0.16952422	8.92986200	1.51382789		48.00000000	0.71541667	6.38857211	1.006316
49	0.17931749	8.93345830	1.60192532		49.00000000	0.70081633	6.26071343	1.027699
50	0.18946876	8.92954160	1.69186917		50.00000000	0.68680000	6.13280917	1.049070
51	0.19921885	8.90537360	1.77411829		51.00000000	0.67333333	5.99628489	1.070448
52	0.20941253	8.92881580	1.86980591		52.00000000	0.66038462	5.89645259	1.091925
53	0.21921623	8.91852760	1.95508600		53.00000000	0.64792453	5.77853279	1.113323
54	0.22934218	8.92642780	2.04720641		54.00000000	0.63592593	5.67654686	1.134676
55	0.23917563	8.91880800	2.13316152		55.00000000	0.62436364	5.56857939	1.156052
56	0.24932466	8.92343240	2.22483175		56.00000000	0.61321429	5.47197623	1.177549
57	0.25946999	8.91823860	2.31401528		57.00000000	0.60245614	5.37284761	1.198924
58	0.26931533	8.92710020	2.40420494		58.00000000	0.59206897	5.28545898	1.220266
59	0.27943090	8.93134590	2.49569402		59.00000000	0.58203390	5.19834607	1.241649
60	0.28928742	8.91591740	2.57926274		60.00000000	0.57233333	5.10287673	1.263117
61	0.29943720	8.92635440	2.67288257		61.00000000	0.56295082	5.02509853	1.284498
62	0.30929744	8.92539500	2.76060182		62.00000000	0.55387097	4.94351717	1.305862
63	0.31940034	8.92148490	2.84952531		63.00000000	0.54507937	4.86291732	1.327241
64	0.32922336	8.92449190	2.93815121		64.00000000	0.53656250	4.78854769	1.348714
65	0.33934784	8.92160510	3.02752742		65.00000000	0.52830769	4.71335260	1.370086
66	0.34918800	8.92477890	3.11642569		66.00000000	0.52030303	4.64358951	1.391431
67	0.35928938	8.91748140	3.20395636		67.00000000	0.51253731	4.57054196	1.412813
68	0.36947340	8.92786600	3.29860901		68.00000000	0.50500000	4.50857233	1.434292
69	0.37932175	8.92761900	3.38644006		69.00000000	0.49768116	4.44310777	1.455666
70	0.38946706	8.90857790	3.46959764		70.00000000	0.49057143	4.37029379	1.477048
71	0.39927074	8.92282100	3.56262134		71.00000000	0.48366197	4.31562920	1.498416
72	0.40944359	8.92032810	3.65237116		72.00000000	0.47694444	4.25450093	1.519890
73	0.41925025	8.91283510	3.73670834		73.00000000	0.47041096	4.19269531	1.541276
74	0.42940003	8.92330360	3.83166683		74.00000000	0.46405405	4.14089521	1.562664
75	0.43922827	8.89549060	3.90715095		75.00000000	0.45786667	4.07294863	1.584036
76	0.44939369	8.91681000	4.00715815		76.00000000	0.45184211	4.02899020	1.605501
77	0.45951146	8.89068980	4.08537385		77.00000000	0.44597403	3.96501672	1.626872
78	0.46935904	8.90252490	4.17848054		78.00000000	0.44025641	3.91939365	1.648267
79	0.47951403	8.87115480	4.25384319		79.00000000	0.43468354	3.85614501	1.669760
80	0.48933706	8.86874100	4.33980365		80.00000000	0.42925000	3.80690707	1.691139
81	0.49943846	8.85558130	4.42281789		81.00000000	0.42395062	3.75432916	1.712509
82	0.50928307	8.82327940	4.49354682		82.00000000	0.41878049	3.69501725	1.733887
83	0.51945519	8.78429700	4.56304867		83.00000000	0.41373494	3.63437059	1.755365
84	0.52919489	8.73224830	4.62106118		84.00000000	0.40880952	3.56982627	1.776758
85	0.53934389	8.64723300	4.66383228		85.00000000	0.40400000	3.49348213	1.798111
86	0.54945648	8.54628750	4.69581305		86.00000000	0.39930233	3.41255247	1.819493
87	0.55928248	8.39254950	4.69380590		87.00000000	0.39471264	3.31264540	1.840978
88	0.56941962	8.16356180	4.64849226		88.00000000	0.39022727	3.18564446	1.862365
89	0.57922107	7.89202020	4.57122438		89.00000000	0.38584270	3.04507836	1.883729
90	0.58934402	7.49082330	4.41467192		90.00000000	0.38155556	2.85816525	1.905105
91	0.59914476	6.98863650	4.18720494		91.00000000	0.37736264	2.63725030	1.926595
92	0.60922086	6.30680700	3.84223838		92.00000000	0.37326087	2.35408427	1.947986
93	0.61903942	5.48807620	3.39733551		93.00000000	0.36924731	2.02645738	1.969328
94	0.62919068	4.42569970	2.78460900		94.00000000	0.36531915	1.61679285	1.990802
95	0.63927275	3.13761830	2.00579388		95.00000000	0.36147368	1.13416645	2.012294
96	0.64906079	1.63838430	1.06341101		96.00000000	0.35770833	0.58606372	2.033672
97	0.65912271	-0.18170962	-0.11976894		97.00000000	0.35402062	-0.06432895	2.055026
98	0.66890484	-2.26816840	-1.51718882		98.00000000	0.35040816	-0.79478472	2.076408
99	0.67897201	-4.74183850	-3.21957562		99.00000000	0.34686869	-1.64479529	2.097890
100	0.68885976	-7.54608440	-5.19819389		100.00000000	0.34340000	-2.59132538	2.119258
101	0.69654298	-9.99495320	-6.96191449		101.00000000	0.34000000	-3.39828409	2.140645
00:50 03/04/2018
Test Lot:	JK-PERC
Recipe:	Recipe_YJX-LID
Cell Name:	1-10-10h
Test Order:	4
Test Condition:	Light
1	-0.29979715	8.92819400	-2.67664712		1.00000000	34.34000000	306.59418196	0.000000
2	-0.29000133	8.93346790	-2.59071757		2.00000000	17.17000000	153.38764384	0.061721
3	-0.27986684	8.93246460	-2.49990064		3.00000000	11.44666667	102.24694479	0.083269
4	-0.27000403	8.92336650	-2.40934492		4.00000000	8.58500000	76.60710140	0.104655
5	-0.25986436	8.93335440	-2.32146042		5.00000000	6.86800000	61.35427802	0.126008
6	-0.24970905	8.92091660	-2.22763361		6.00000000	5.72333333	51.05737934	0.147383
7	-0.23992589	8.93014810	-2.14257373		7.00000000	4.90571429	43.80875511	0.168875
8	-0.22978918	8.91959480	-2.04962638		8.00000000	4.29250000	38.28736068	0.190257
9	-0.21994424	8.92619510	-1.96326520		9.00000000	3.81555556	34.05839330	0.211599
10	-0.20973311	8.92995450	-1.87290713		10.00000000	3.43400000	30.66546375	0.232974
11	-0.19992389	8.92655370	-1.78463134		11.00000000	3.12181818	27.86707764	0.254447
12	-0.18981101	8.94003960	-1.69691795		12.00000000	2.86166667	25.58341332	0.275839
13	-0.18002784	8.92367360	-1.60650968		13.00000000	2.64153846	23.57222703	0.297191
14	-0.16987254	8.94071870	-1.51878259		14.00000000	2.45285714	21.93030573	0.318567
15	-0.16005364	8.91832640	-1.42741060		15.00000000	2.28933333	20.41702191	0.340057
16	-0.14988865	8.93765640	-1.33965325		16.00000000	2.14625000	19.18244505	0.361440
17	-0.13974003	8.92171290	-1.24672043		17.00000000	2.02000000	18.02186006	0.382805
18	-0.12994646	8.93754290	-1.16140206		18.00000000	1.90777778	17.05084573	0.404175
19	-0.11979635	8.92312430	-1.06895772		19.00000000	1.80736842	16.12737308	0.425649
20	-0.10997076	8.93558030	-0.98265256		20.00000000	1.71700000	15.34239138	0.447028
21	-0.09980503	8.92844300	-0.89110349		21.00000000	1.63523810	14.60013012	0.468407
22	-0.08998837	8.93159200	-0.80373943		22.00000000	1.56090909	13.94140315	0.489771
23	-0.07983381	8.91907880	-0.71204401		23.00000000	1.49304348	13.31657243	0.511249
24	-0.07002906	8.93454740	-0.62567794		24.00000000	1.43083333	12.78384824	0.532638
25	-0.05989458	8.92444800	-0.53452610		25.00000000	1.37360000	12.25862177	0.554025
26	-0.04975118	8.92843150	-0.44420001		26.00000000	1.32076923	11.79239760	0.575496
27	-0.03993229	8.92908860	-0.35655897		27.00000000	1.27185185	11.35647787	0.596946
28	-0.02980526	8.93322940	-0.26625724		28.00000000	1.22642857	10.95596777	0.618311
29	-0.01997744	8.92520240	-0.17830270		29.00000000	1.18413793	10.56867070	0.639696
30	-0.00981320	8.91967680	-0.08753054		30.00000000	1.14466667	10.21005671	0.661057
31	-0.00068130	8.93350120	-0.00608642		31.00000000	1.10774194	9.89601391	0.682659
32	0.00949241	8.92277910	0.08469869		32.00000000	1.07312500	9.57525732	0.704032
33	0.01935196	8.92861840	0.17278623		33.00000000	1.04060606	9.29117442	0.725413
34	0.02945414	8.92475510	0.26287095		34.00000000	1.01000000	9.01400265	0.746766
35	0.03929507	8.92362020	0.35065432		35.00000000	0.98114286	8.75534622	0.768236
36	0.04939279	8.92047790	0.44060726		36.00000000	0.95388889	8.50914475	0.789628
37	0.05924563	8.92502210	0.52876857		37.00000000	0.92810811	8.28338538	0.811009
38	0.06940512	8.92474170	0.61942280		38.00000000	0.90368421	8.06514816	0.832375
39	0.07955122	8.92949580	0.71035228		39.00000000	0.88051282	7.86253553	0.853864
40	0.08936238	8.91835690	0.79696563		40.00000000	0.85850000	7.65640940	0.875242
41	0.09955908	8.93163870	0.88922577		41.00000000	0.83756098	7.48079202	0.896633
42	0.10935164	8.92837810	0.97633279		42.00000000	0.81761905	7.30001200	0.918125
43	0.11953421	8.92696290	1.06707746		43.00000000	0.79860465	7.12911409	0.939510
44	0.12932527	8.92566110	1.15431353		44.00000000	0.78045455	6.96607278	0.960871
45	0.13950635	8.92143920	1.24459742		45.00000000	0.76311111	6.80804938	0.982247
46	0.14930710	8.93563080	1.33415312		46.00000000	0.74652174	6.67064265	1.003733
47	0.15944500	8.92810250	1.42354130		47.00000000	0.73063830	6.52321361	1.025120
48	0.16956802	8.92328640	1.51310401		48.00000000	0.71541667	6.38386781	1.046467
49	0.17942013	8.92911240	1.60206251		49.00000000	0.70081633	6.25766775	1.067837
50	0.18955281	8.92756840	1.69224568		50.00000000	0.68680000	6.13145398	1.089334
51	0.19934240	8.91222190	1.77658370		51.00000000	0.67333333	6.00089608	1.110717
52	0.20951082	8.92621330	1.87013827		52.00000000	0.66038462	5.89473394	1.132135
53	0.21932720	8.92458150	1.95740347		53.00000000	0.64792453	5.78245526	1.153535
54	0.22945915	8.90992070	2.04446283		54.00000000	0.63592593	5.66604957	1.175018
55	0.23929191	8.93175220	2.13729604		55.00000000	0.62436364	5.57666128	1.196411
56	0.24942310	8.92268180	2.22552295		56.00000000	0.61321429	5.47151595	1.217764
57	0.25958335	8.92760660	2.31745803		57.00000000	0.60245614	5.37849141	1.239134
58	0.26938483	8.91730210	2.40218591		58.00000000	0.59206897	5.27965783	1.260608
59	0.27953166	8.92529580	2.49490275		59.00000000	0.58203390	5.19482471	1.281999
60	0.28933316	8.90731530	2.57718168		60.00000000	0.57233333	5.09795346	1.303339
61	0.29952168	8.93754290	2.67698786		61.00000000	0.56295082	5.03139710	1.324719
62	0.30931127	8.91319470	2.75695157		62.00000000	0.55387097	4.93675977	1.346205
63	0.31944767	8.92806050	2.85204812		63.00000000	0.54507937	4.86650155	1.367588
64	0.32922462	8.91478350	2.93496621		64.00000000	0.53656250	4.78333852	1.388961
65	0.33947414	8.91528890	3.02651003		65.00000000	0.52830769	4.71001571	1.410333
66	0.34923097	8.92846110	3.11809513		66.00000000	0.52030303	4.64550537	1.431808
67	0.35937336	8.91741560	3.20468161		67.00000000	0.51253731	4.57050823	1.453190
68	0.36949340	8.93233110	3.30043739		68.00000000	0.50500000	4.51082721	1.474568
69	0.37937304	8.91245560	3.38114537		69.00000000	0.49768116	4.43556124	1.495932
70	0.38951838	8.91839310	3.47387803		70.00000000	0.49057143	4.37510884	1.517404
71	0.39936230	8.91998860	3.56230716		71.00000000	0.48366197	4.31425927	1.538786
72	0.40951359	8.92018410	3.65293661		72.00000000	0.47694444	4.25443225	1.560173
73	0.41929427	8.92135910	3.74067475		73.00000000	0.47041096	4.19670509	1.581655
74	0.42947906	8.91918950	3.83060512		74.00000000	0.46405405	4.13898605	1.603025
75	0.43929172	8.91448020	3.91605734		75.00000000	0.45786667	4.08164333	1.624381
76	0.44943407	8.90494730	4.00218671		76.00000000	0.45184211	4.02363014	1.645757
77	0.45954594	8.90931800	4.09424092		77.00000000	0.44597403	3.97332442	1.667240
78	0.46944717	8.88895700	4.17289571		78.00000000	0.44025641	3.91342030	1.688642
79	0.47958356	8.89037510	4.26367774		79.00000000	0.43468354	3.86449976	1.709997
80	0.48938060	8.86535170	4.33853113		80.00000000	0.42925000	3.80545222	1.731369
81	0.49955052	8.85178850	4.42191555		81.00000000	0.42395062	3.75272120	1.752847
82	0.50933713	8.81902790	4.49185836		82.00000000	0.41878049	3.69323681	1.774206
83	0.51952487	8.78075700	4.56182164		83.00000000	0.41373494	3.63290597	1.795571
84	0.52924973	8.73830510	4.62474561		84.00000000	0.40880952	3.57230235	1.816948
85	0.53937644	8.64738750	4.66419709		85.00000000	0.40400000	3.49354455	1.838423
86	0.54954338	8.54722310	4.69706987		86.00000000	0.39930233	3.41292606	1.859808
87	0.55939031	8.38148210	4.68851987		87.00000000	0.39471264	3.30827696	1.881149
88	0.56945896	8.18435570	4.66065469		88.00000000	0.39022727	3.19375880	1.902530
89	0.57927310	7.88998080	4.57045364		89.00000000	0.38584270	3.04429147	1.924015
90	0.58943635	7.50230030	4.42212851		90.00000000	0.38155556	2.86254436	1.945386
91	0.59921253	6.99900390	4.19389083		91.00000000	0.37736264	2.64116257	1.966727
92	0.60936904	6.32588580	3.85479896		92.00000000	0.37326087	2.36120563	1.988201
93	0.61905962	5.49941110	3.40446335		93.00000000	0.36924731	2.03064277	2.009716
94	0.62923473	4.44995260	2.80006472		94.00000000	0.36531915	1.62565290	2.031105
95	0.63931608	3.14981130	2.01372501		95.00000000	0.36147368	1.13857390	2.052471
96	0.64904463	1.65253940	1.07257182		96.00000000	0.35770833	0.59112711	2.073826
97	0.65914381	-0.19377366	-0.12772471		97.00000000	0.35402062	-0.06859987	2.095332
98	0.66895425	-2.28220840	-1.52669301		98.00000000	0.35040816	-0.79970445	2.116728
99	0.67905492	-4.77921630	-3.24535034		99.00000000	0.34686869	-1.65776048	2.138109
100	0.68887204	-7.61650370	-5.24679644		100.00000000	0.34340000	-2.61550737	2.159476
101	0.69629627	-9.99559500	-6.95989551		101.00000000	0.34000000	-3.39850230	2.180963
