# Supplementary material for: Study on the Electrical Injection Regeneration of Industrialized B-Doped Czochralski Silicon PERC Solar Cells
Source: Hindawi journal article supplement (doi:10.1155/2019/5357370), 2019-06-20
Supplement: f1 [file 5357370.f1.zip › section3.1/IVRawData_1-10-11h.csv]

01:50 03/04/2018
Test Lot:	JK-PERC
Recipe:	Recipe_YJX-LID
Cell Name:	1-10-11h
Test Order:	2
Test Condition:	Light
1	-0.29979444	8.95615100	-2.68500427		1.00000000	34.34000000	307.55422534	0.000000
2	-0.28995177	8.93787380	-2.59155233		2.00000000	17.17000000	153.46329315	0.061778
3	-0.27985826	8.94411180	-2.50308357		3.00000000	11.44666667	102.38026640	0.083206
4	-0.27007887	8.94315430	-2.41535701		4.00000000	8.58500000	76.77697967	0.104703
5	-0.25984991	8.94386670	-2.32406296		5.00000000	6.86800000	61.42647650	0.126077
6	-0.24974823	8.94438550	-2.23384445		6.00000000	5.72333333	51.19169968	0.147469
7	-0.23991896	8.94187740	-2.14532593		7.00000000	4.90571429	43.86629570	0.168807
8	-0.22974955	8.94444750	-2.05498279		8.00000000	4.29250000	38.39404089	0.190348
9	-0.21993591	8.95056340	-1.96855031		9.00000000	3.81555556	34.15137191	0.211748
10	-0.20978063	8.94046590	-1.87553657		10.00000000	3.43400000	30.70155990	0.233135
11	-0.19995806	8.94919010	-1.78946269		11.00000000	3.12181818	27.93774437	0.254629
12	-0.18981768	8.94602490	-1.69811369		12.00000000	2.86166667	25.60054126	0.276121
13	-0.18003827	8.95020290	-1.61137905		13.00000000	2.64153846	23.64230520	0.297489
14	-0.16989863	8.94805050	-1.52026152		14.00000000	2.45285714	21.94828958	0.318871
15	-0.16003586	8.94318390	-1.43123013		15.00000000	2.28933333	20.47392901	0.340210
16	-0.14991111	8.94180580	-1.34047603		16.00000000	2.14625000	19.19135070	0.361704
17	-0.13975286	8.93953130	-1.24932507		17.00000000	2.02000000	18.05785323	0.383107
18	-0.12994443	8.94592480	-1.16247310		18.00000000	1.90777778	17.06683654	0.404501
19	-0.11978544	8.93677900	-1.07049600		19.00000000	1.80736842	16.15205215	0.425861
20	-0.10996883	8.94598770	-0.98377980		20.00000000	1.71700000	15.36026088	0.447343
21	-0.09980685	8.93673230	-0.89194713		21.00000000	1.63523810	14.61368510	0.468726
22	-0.08998056	8.94923880	-0.80525750		22.00000000	1.56090909	13.96894820	0.490114
23	-0.07985134	8.94037720	-0.71390107		23.00000000	1.49304348	13.34837187	0.511462
24	-0.06999453	8.95430370	-0.62675230		24.00000000	1.43083333	12.81211621	0.532948
25	-0.05989955	8.94559380	-0.53583701		25.00000000	1.37360000	12.28766764	0.554335
26	-0.04969961	8.92908100	-0.44377186		26.00000000	1.32076923	11.79325544	0.575721
27	-0.03986514	8.95681860	-0.35706479		27.00000000	1.27185185	11.39174632	0.597214
28	-0.02977908	8.93557930	-0.26609335		28.00000000	1.22642857	10.95884976	0.618598
29	-0.01994311	8.94654370	-0.17842194		29.00000000	1.18413793	10.59394175	0.639949
30	-0.00981017	8.93152710	-0.08761980		30.00000000	1.14466667	10.22362135	0.661320
31	-0.00063514	8.94596770	-0.00568198		31.00000000	1.10774194	9.90982357	0.682931
32	0.00952141	8.94682220	0.08518635		32.00000000	1.07312500	9.60105857	0.704300
33	0.01932881	8.95324420	0.17305559		33.00000000	1.04060606	9.31680018	0.725646
34	0.02951506	8.93630500	0.26375556		34.00000000	1.01000000	9.02566805	0.747023
35	0.03930683	8.94971940	0.35178511		35.00000000	0.98114286	8.78095326	0.768495
36	0.04945214	8.93039890	0.44162735		36.00000000	0.95388889	8.51860828	0.789874
37	0.05928559	8.96036150	0.53122034		37.00000000	0.92810811	8.31618416	0.811235
38	0.06941973	8.92810630	0.61978676		38.00000000	0.90368421	8.06818869	0.832607
39	0.07956281	8.94765000	0.71190020		39.00000000	0.88051282	7.87852054	0.854081
40	0.08939627	8.93421080	0.79868510		40.00000000	0.85850000	7.67001997	0.875455
41	0.09952818	8.93086150	0.88887238		41.00000000	0.83756098	7.48014107	0.896798
42	0.10934228	8.95978260	0.97968306		42.00000000	0.81761905	7.32568892	0.918176
43	0.11953076	8.94222930	1.06887146		43.00000000	0.79860465	7.14130591	0.939654
44	0.12933221	8.92795940	1.15467272		44.00000000	0.78045455	6.96786650	0.961042
45	0.13949092	8.95410820	1.24901679		45.00000000	0.76311111	6.83297946	0.982411
46	0.14932288	8.93338970	1.33395948		46.00000000	0.74652174	6.66896962	1.003783
47	0.15948680	8.95305060	1.42789339		47.00000000	0.73063830	6.54144165	1.025264
48	0.16962242	8.93114850	1.51492302		48.00000000	0.71541667	6.38949249	1.046657
49	0.17942090	8.94619940	1.60513515		49.00000000	0.70081633	6.26964260	1.068010
50	0.18954834	8.94443420	1.69540265		50.00000000	0.68680000	6.14303741	1.089378
51	0.19935724	8.93956760	1.78216752		51.00000000	0.67333333	6.01930885	1.110847
52	0.20949957	8.94026180	1.87298100		52.00000000	0.66038462	5.90401135	1.132230
53	0.21930847	8.94083790	1.96080148		53.00000000	0.64792453	5.79298818	1.153605
54	0.22947089	8.93934440	2.05131932		54.00000000	0.63592593	5.68476086	1.174980
55	0.23926936	8.95213890	2.14197255		55.00000000	0.62436364	5.58939000	1.196464
56	0.24943997	8.93501850	2.22875075		56.00000000	0.61321429	5.47908099	1.217859
57	0.25960910	8.93720630	2.32018008		57.00000000	0.60245614	5.38427481	1.239242
58	0.26942173	8.93650530	2.40768872		58.00000000	0.59206897	5.29102745	1.260729
59	0.27957743	8.93322660	2.49752853		59.00000000	0.58203390	5.19944070	1.282121
60	0.28937516	8.93987660	2.58697822		60.00000000	0.57233333	5.11658937	1.303473
61	0.29952940	8.93950940	2.67764589		61.00000000	0.56295082	5.03250414	1.324842
62	0.30932418	8.94888020	2.76810503		62.00000000	0.55387097	4.95652494	1.346328
63	0.31947541	8.93248560	2.85370950		63.00000000	0.54507937	4.86891358	1.367696
64	0.32927465	8.95149990	2.94750200		64.00000000	0.53656250	4.80303917	1.389043
65	0.33940804	8.94722270	3.03675932		65.00000000	0.52830769	4.72688658	1.410426
66	0.34926903	8.93513870	3.12076723		66.00000000	0.52030303	4.64897974	1.431901
67	0.35939425	8.93736360	3.21203709		67.00000000	0.51253731	4.58073233	1.453271
68	0.36953136	8.93748000	3.30267914		68.00000000	0.50500000	4.51342740	1.474623
69	0.37939608	8.95366480	3.39698533		69.00000000	0.49768116	4.45607028	1.496011
70	0.38950714	8.92377090	3.47587248		70.00000000	0.49057143	4.37774704	1.517481
71	0.39936218	8.93770220	3.56938023		71.00000000	0.48366197	4.32282667	1.538856
72	0.40949410	8.93777370	3.65996560		72.00000000	0.47694444	4.26282151	1.560196
73	0.41933724	8.93599320	3.74719473		73.00000000	0.47041096	4.20358913	1.581584
74	0.42948923	8.92585370	3.83355803		74.00000000	0.46405405	4.14207860	1.603065
75	0.43932268	8.91771790	3.91775573		75.00000000	0.45786667	4.08312577	1.624444
76	0.44948214	8.92416950	4.01125480		76.00000000	0.45184211	4.03231553	1.645802
77	0.45959023	8.92417430	4.10146332		77.00000000	0.44597403	3.97994994	1.667176
78	0.46943784	8.91071030	4.18302460		78.00000000	0.44025641	3.92299733	1.688663
79	0.47955784	8.90035340	4.26823425		79.00000000	0.43468354	3.86883716	1.710055
80	0.48945826	8.89256670	4.35254022		80.00000000	0.42925000	3.81713426	1.731421
81	0.49956340	8.86636830	4.42931309		81.00000000	0.42395062	3.75890231	1.752779
82	0.50939238	8.83066370	4.49827280		82.00000000	0.41878049	3.69810965	1.774259
83	0.51951015	8.79617400	4.56970167		83.00000000	0.41373494	3.63928452	1.795633
84	0.52929819	8.74678330	4.62965657		84.00000000	0.40880952	3.57576832	1.817025
85	0.53941971	8.67128560	4.67746236		85.00000000	0.40400000	3.50319938	1.838398
86	0.54956502	8.55142970	4.69956663		86.00000000	0.39930233	3.41460577	1.859866
87	0.55941111	8.41488840	4.70738206		87.00000000	0.39471264	3.32146285	1.881260
88	0.56953406	8.19234660	4.66582042		88.00000000	0.39022727	3.19687707	1.902639
89	0.57930648	7.92591710	4.59153514		89.00000000	0.38584270	3.05815723	1.924127
90	0.58943993	7.50650740	4.42463520		90.00000000	0.38155556	2.86414960	1.945524
91	0.59925848	7.01273780	4.20244259		91.00000000	0.37736264	2.64634523	1.966890
92	0.60935020	6.34607740	3.86698353		92.00000000	0.37326087	2.36874237	1.988359
93	0.61915165	5.52862740	3.42305878		93.00000000	0.36924731	2.04143081	2.009878
94	0.62927461	4.46622280	2.81048061		94.00000000	0.36531915	1.63159671	2.031261
95	0.63935220	3.18078610	2.03364259		95.00000000	0.36147368	1.14977047	2.052595
96	0.64907849	1.68114880	1.09119752		96.00000000	0.35770833	0.60136094	2.073979
97	0.65919775	-0.15011615	-0.09895623		97.00000000	0.35402062	-0.05314421	2.095454
98	0.66898358	-2.22907350	-1.49121357		98.00000000	0.35040816	-0.78108555	2.116838
99	0.67903507	-4.72423360	-3.20792029		99.00000000	0.34686869	-1.63868871	2.138173
100	0.68892360	-7.53072450	-5.18809383		100.00000000	0.34340000	-2.58605079	2.159544
101	0.69663066	-9.99479580	-6.96268119		101.00000000	0.34000000	-3.39823057	2.181015
01:50 03/04/2018
Test Lot:	JK-PERC
Recipe:	Recipe_YJX-LID
Cell Name:	1-10-11h
Test Order:	3
Test Condition:	Light
1	-0.29984578	8.94623280	-2.68249015		1.00000000	34.34000000	307.21363435	0.000000
2	-0.28995252	8.93872640	-2.59180625		2.00000000	17.17000000	153.47793229	0.021592
3	-0.27983370	8.93041230	-2.49903032		3.00000000	11.44666667	102.22345279	0.042990
4	-0.27001485	8.96109770	-2.41962945		4.00000000	8.58500000	76.93102375	0.064342
5	-0.25988936	8.94822600	-2.32554873		5.00000000	6.86800000	61.45641617	0.085727
6	-0.24973707	8.94238280	-2.23324448		6.00000000	5.72333333	51.18023756	0.107221
7	-0.23990408	8.94193740	-2.14520727		7.00000000	4.90571429	43.86659005	0.128607
8	-0.22979122	8.93259530	-2.05263197		8.00000000	4.29250000	38.34316533	0.150006
9	-0.21993293	8.94714740	-1.96777234		9.00000000	3.81555556	34.13833797	0.171381
10	-0.20976053	8.93691920	-1.87461291		10.00000000	3.43400000	30.68938053	0.192859
11	-0.19996774	8.94672390	-1.78905616		11.00000000	3.12181818	27.93004534	0.214244
12	-0.18982214	8.94397160	-1.69776383		12.00000000	2.86166667	25.59466540	0.235663
13	-0.18003084	8.94275670	-1.60997200		13.00000000	2.64153846	23.62263578	0.257046
14	-0.16985919	8.93316460	-1.51738010		14.00000000	2.45285714	21.91177660	0.278539
15	-0.16003290	8.95614240	-1.43327744		15.00000000	2.28933333	20.50359533	0.299917
16	-0.14991632	8.92689320	-1.33828698		16.00000000	2.14625000	19.15934453	0.321296
17	-0.13973053	8.94989490	-1.25057356		17.00000000	2.02000000	18.07878770	0.342653
18	-0.12991169	8.93020250	-1.16013770		18.00000000	1.90777778	17.03684188	0.364123
19	-0.11976981	8.94670870	-1.07154560		19.00000000	1.80736842	16.16999878	0.385517
20	-0.10994203	8.93895720	-0.98276710		20.00000000	1.71700000	15.34818951	0.406911
21	-0.09981950	8.94250300	-0.89263621		21.00000000	1.63523810	14.62312157	0.428385
22	-0.08996419	8.94713400	-0.80492165		22.00000000	1.56090909	13.96566280	0.449761
23	-0.07985878	8.93409060	-0.71346558		23.00000000	1.49304348	13.33898570	0.471106
24	-0.07000867	8.94699100	-0.62636697		24.00000000	1.43083333	12.80165296	0.492491
25	-0.05984075	8.94195940	-0.53509352		25.00000000	1.37360000	12.28267543	0.513977
26	-0.04970631	8.92469020	-0.44361345		26.00000000	1.32076923	11.78745621	0.535346
27	-0.03988151	8.95504950	-0.35714089		27.00000000	1.27185185	11.38949629	0.556689
28	-0.02974931	8.92999740	-0.26566126		28.00000000	1.22642857	10.95200395	0.578068
29	-0.01993418	8.94087790	-0.17822910		29.00000000	1.18413793	10.58723266	0.599544
30	-0.00977072	8.93910410	-0.08734150		30.00000000	1.14466667	10.23229449	0.620903
31	-0.00061803	8.94366170	-0.00552741		31.00000000	1.10774194	9.90726912	0.642379
32	0.00950057	8.93748860	0.08491122		32.00000000	1.07312500	9.59104245	0.663757
33	0.01935710	8.93556790	0.17296665		33.00000000	1.04060606	9.29840611	0.685229
34	0.02949943	8.94611260	0.26390519		34.00000000	1.01000000	9.03557373	0.706620
35	0.03930088	8.93177130	0.35102645		35.00000000	0.98114286	8.76334361	0.727971
36	0.04946256	8.94858260	0.44261981		36.00000000	0.95388889	8.53595351	0.749344
37	0.05929006	8.93443780	0.52972334		37.00000000	0.92810811	8.29212416	0.770830
38	0.06943611	8.95176030	0.62157542		38.00000000	0.90368421	8.08956444	0.792195
39	0.07955983	8.93072130	0.71052670		39.00000000	0.88051282	7.86361460	0.813552
40	0.08939552	8.95477390	0.80051670		40.00000000	0.85850000	7.68767339	0.834922
41	0.09953116	8.92613220	0.88842828		41.00000000	0.83756098	7.47617999	0.856393
42	0.10934824	8.94711780	0.97835158		42.00000000	0.81761905	7.31533393	0.877791
43	0.11954490	8.93471620	1.06809975		43.00000000	0.79860465	7.13530591	0.899156
44	0.12934858	8.94335270	1.15680997		44.00000000	0.78045455	6.97988027	0.920527
45	0.13946114	8.93962760	1.24673066		45.00000000	0.76311111	6.82192915	0.942010
46	0.14931543	8.94505310	1.33563445		46.00000000	0.74652174	6.67767660	0.963364
47	0.15945925	8.93740840	1.42515244		47.00000000	0.73063830	6.53001286	0.984749
48	0.16957182	8.93859000	1.51573297		48.00000000	0.71541667	6.39481626	1.006111
49	0.17944695	8.94025900	1.60430221		49.00000000	0.70081633	6.26547947	1.027586
50	0.18956174	8.94043540	1.69476449		50.00000000	0.68680000	6.14029103	1.048968
51	0.19937733	8.94557090	1.78354404		51.00000000	0.67333333	6.02335107	1.070355
52	0.20948990	8.93451980	1.87169166		52.00000000	0.66038462	5.90021942	1.091838
53	0.21932484	8.94557760	1.96198738		53.00000000	0.64792453	5.79605915	1.113220
54	0.22947609	8.94207950	2.05199344		54.00000000	0.63592593	5.68650019	1.134576
55	0.23927903	8.93754860	2.13856796		55.00000000	0.62436364	5.58028034	1.155942
56	0.24942359	8.94240470	2.23044668		56.00000000	0.61321429	5.48361031	1.177431
57	0.25958827	8.94606780	2.32229426		57.00000000	0.60245614	5.38961348	1.198818
58	0.26940683	8.93789770	2.40793069		58.00000000	0.59206897	5.29185185	1.220162
59	0.27958041	8.94283680	2.50024198		59.00000000	0.58203390	5.20503416	1.241543
60	0.28935879	8.93626500	2.58578683		60.00000000	0.57233333	5.11452234	1.263024
61	0.29954803	8.95777800	2.68328475		61.00000000	0.56295082	5.04278847	1.284400
62	0.30936435	8.93491360	2.76414374		62.00000000	0.55387097	4.94878924	1.305758
63	0.31946203	8.94794180	2.85852765		63.00000000	0.54507937	4.87733844	1.327133
64	0.32928953	8.93289280	2.94150807		64.00000000	0.53656250	4.79305529	1.348610
65	0.33945566	8.93525220	3.03312193		65.00000000	0.52830769	4.72056247	1.369987
66	0.34925711	8.94511700	3.12414571		66.00000000	0.52030303	4.65417148	1.391339
67	0.35940096	8.93449590	3.21106640		67.00000000	0.51253731	4.57926253	1.412719
68	0.36959314	8.92253590	3.29770806		68.00000000	0.50500000	4.50588063	1.434191
69	0.37938565	8.94727800	3.39446888		69.00000000	0.49768116	4.45289169	1.455565
70	0.38954511	8.93026450	3.47874087		70.00000000	0.49057143	4.38093261	1.476920
71	0.39937261	8.94482800	3.57231930		71.00000000	0.48366197	4.32627315	1.498299
72	0.40950602	8.92009070	3.65283084		72.00000000	0.47694444	4.25438770	1.519774
73	0.41934764	8.94027230	3.74908209		73.00000000	0.47041096	4.20560207	1.541153
74	0.42950636	8.92928980	3.83518676		74.00000000	0.46405405	4.14367313	1.562513
75	0.43931302	8.92689800	3.92170252		75.00000000	0.45786667	4.08732903	1.583881
76	0.44946724	8.92753890	4.01263627		76.00000000	0.45184211	4.03383797	1.605360
77	0.45960736	8.91115090	4.09563054		77.00000000	0.44597403	3.97414184	1.626738
78	0.46943262	8.91840360	4.18658957		78.00000000	0.44025641	3.92638435	1.648116
79	0.47960100	8.88503740	4.26127282		79.00000000	0.43468354	3.86217955	1.669471
80	0.48944339	8.90445040	4.35822439		80.00000000	0.42925000	3.82223533	1.690946
81	0.49958423	8.86646650	4.42954684		81.00000000	0.42395062	3.75894395	1.712329
82	0.50935072	8.82680320	4.49593857		82.00000000	0.41878049	3.69649295	1.733710
83	0.51951534	8.80912400	4.57647505		83.00000000	0.41373494	3.64464239	1.755179
84	0.52929670	8.75538920	4.63419861		84.00000000	0.40880952	3.57928649	1.776575
85	0.53944349	8.67749310	4.68101716		85.00000000	0.40400000	3.50570721	1.797912
86	0.54956502	8.56136320	4.70502574		86.00000000	0.39930233	3.41857224	1.819288
87	0.55937839	8.40996650	4.70435352		87.00000000	0.39471264	3.31952011	1.840780
88	0.56952220	8.20579530	4.67338259		88.00000000	0.39022727	3.20212512	1.862147
89	0.57931620	7.93233540	4.59533040		89.00000000	0.38584270	3.06063368	1.883512
90	0.58945256	7.53279450	4.44022500		90.00000000	0.38155556	2.87417959	1.904899
91	0.59924209	7.03215030	4.21396044		91.00000000	0.37736264	2.65367078	1.926373
92	0.60934275	6.36055370	3.87575728		92.00000000	0.37326087	2.37414580	1.947743
93	0.61912483	5.55469560	3.43904997		93.00000000	0.36924731	2.05105642	1.969103
94	0.62926126	4.49099830	2.82601125		94.00000000	0.36531915	1.64064768	1.990582
95	0.63939613	3.17919060	2.03276217		95.00000000	0.36147368	1.14919374	2.012080
96	0.64911568	1.69133000	1.09786882		96.00000000	0.35770833	0.60500284	2.033462
97	0.65918958	-0.17821118	-0.11747495		97.00000000	0.35402062	-0.06309043	2.054805
98	0.66898805	-2.27399210	-1.52127354		98.00000000	0.35040816	-0.79682540	2.076187
99	0.67902911	-4.80683850	-3.26398327		99.00000000	0.34686869	-1.66734176	2.097674
100	0.68894225	-7.69199560	-5.29934076		100.00000000	0.34340000	-2.64143129	2.119040
101	0.69602108	-9.99585820	-6.95732802		101.00000000	0.34000000	-3.39859179	2.140402
01:50 03/04/2018
Test Lot:	JK-PERC
Recipe:	Recipe_YJX-LID
Cell Name:	1-10-11h
Test Order:	4
Test Condition:	Light
1	-0.29983249	8.94774150	-2.68282361		1.00000000	34.34000000	307.26544311	0.000000
2	-0.28999412	8.93775370	-2.59189602		2.00000000	17.17000000	153.46123103	0.061830
3	-0.27987960	8.93961240	-2.50201514		3.00000000	11.44666667	102.32876327	0.083255
4	-0.27003604	8.94081590	-2.41434252		4.00000000	8.58500000	76.75690450	0.104752
5	-0.25987759	8.94538880	-2.32470608		5.00000000	6.86800000	61.43693028	0.126141
6	-0.24974373	8.94686030	-2.23442226		6.00000000	5.72333333	51.20586378	0.147491
7	-0.23992024	8.93981930	-2.14484359		7.00000000	4.90571429	43.85619925	0.168875
8	-0.22977298	8.94455050	-2.05521602		8.00000000	4.29250000	38.39448302	0.190356
9	-0.21997555	8.93632980	-1.96577406		9.00000000	3.81555556	34.09706281	0.211740
10	-0.20979553	8.94157220	-1.87590188		10.00000000	3.43400000	30.70535893	0.233100
11	-0.19999661	8.94517990	-1.78900566		11.00000000	3.12181818	27.92522525	0.254466
12	-0.18986051	8.93291950	-1.69600865		12.00000000	2.86166667	25.56303797	0.275939
13	-0.18003255	8.93865300	-1.60924849		13.00000000	2.64153846	23.61179569	0.297314
14	-0.16991878	8.94165900	-1.51935579		14.00000000	2.45285714	21.93261215	0.318662
15	-0.16009083	8.94162560	-1.43147226		15.00000000	2.28933333	20.47036154	0.340042
16	-0.14995474	8.93580820	-1.33996680		16.00000000	2.14625000	19.17847835	0.361526
17	-0.13977844	8.95966530	-1.25236804		17.00000000	2.02000000	18.09852391	0.382900
18	-0.12998472	8.93279740	-1.16112717		18.00000000	1.90777778	17.04179237	0.404242
19	-0.11981736	8.94424060	-1.07167530		19.00000000	1.80736842	16.16553801	0.425617
20	-0.11003184	8.94295880	-0.98401021		20.00000000	1.71700000	15.35506026	0.447103
21	-0.09984735	8.95325370	-0.89395869		21.00000000	1.63523810	14.64070153	0.468537
22	-0.08999037	8.93701740	-0.80424550		22.00000000	1.56090909	13.94987171	0.489929
23	-0.07986395	8.94177060	-0.71412513		23.00000000	1.49304348	13.35045228	0.511271
24	-0.07004344	8.92854210	-0.62538578		24.00000000	1.43083333	12.77525565	0.532741
25	-0.05989543	8.94800190	-0.53594442		25.00000000	1.37360000	12.29097541	0.554127
26	-0.04975858	8.95253750	-0.44546558		26.00000000	1.32076923	11.82423607	0.575511
27	-0.03992914	8.93567090	-0.35679369		27.00000000	1.27185185	11.36484958	0.596974
28	-0.02976699	8.94224450	-0.26618372		28.00000000	1.22642857	10.96702415	0.618438
29	-0.01996137	8.95544340	-0.17876290		29.00000000	1.18413793	10.60448022	0.639806
30	-0.00980592	8.93257710	-0.08759210		30.00000000	1.14466667	10.22482325	0.661209
31	-0.00061808	8.94815730	-0.00553063		31.00000000	1.10774194	9.91224909	0.682720
32	0.00951261	8.94787310	0.08511759		32.00000000	1.07312500	9.60218632	0.704214
33	0.01932912	8.94335560	0.17286716		33.00000000	1.04060606	9.30651004	0.725595
34	0.02949544	8.91916660	0.26307476		34.00000000	1.01000000	9.00835827	0.746954
35	0.03931418	8.95843890	0.35219372		35.00000000	0.98114286	8.78950834	0.768305
36	0.04945446	8.93051240	0.44165369		36.00000000	0.95388889	8.51871655	0.789785
37	0.05928809	8.94011500	0.53004232		37.00000000	0.92810811	8.29739322	0.811161
38	0.06938817	8.94200900	0.62046968		38.00000000	0.90368421	8.08075234	0.832550
39	0.07950612	8.94601060	0.71126261		39.00000000	0.88051282	7.87707703	0.853893
40	0.08935910	8.94642450	0.79944441		40.00000000	0.85850000	7.68050543	0.875365
41	0.09952319	8.94324870	0.89006068		41.00000000	0.83756098	7.49051611	0.896750
42	0.10932705	8.94426540	0.97785015		42.00000000	0.81761905	7.31300176	0.918137
43	0.11950231	8.93941590	1.06828085		43.00000000	0.79860465	7.13905912	0.939625
44	0.12933445	8.94723220	1.15718536		44.00000000	0.78045455	6.98290804	0.961020
45	0.13944124	8.94819550	1.24774748		45.00000000	0.76311111	6.82846741	0.982366
46	0.14930686	8.93050770	1.33338606		46.00000000	0.74652174	6.66681814	1.003749
47	0.15940695	8.94700720	1.42621513		47.00000000	0.73063830	6.53702611	1.025221
48	0.16958295	8.93997290	1.51606698		48.00000000	0.71541667	6.39580561	1.046603
49	0.17939052	8.93975640	1.60370755		49.00000000	0.70081633	6.26512724	1.067967
50	0.18950103	8.93628310	1.69343485		50.00000000	0.68680000	6.13743923	1.089352
51	0.19933020	8.94590280	1.78318859		51.00000000	0.67333333	6.02357455	1.110844
52	0.20947196	8.94489770	1.87370525		52.00000000	0.66038462	5.90707283	1.132234
53	0.21927209	8.93114660	1.95835118		53.00000000	0.64792453	5.78670895	1.153580
54	0.22945406	8.93875690	2.05103406		54.00000000	0.63592593	5.68438726	1.174952
55	0.23930033	8.94691560	2.14099986		55.00000000	0.62436364	5.58612876	1.196424
56	0.24944581	8.93018720	2.22759778		56.00000000	0.61321429	5.47611837	1.217816
57	0.25956303	8.95345880	2.32398690		57.00000000	0.60245614	5.39406623	1.239153
58	0.26938176	8.93417070	2.40670263		58.00000000	0.59206897	5.28964520	1.260528
59	0.27951980	8.92755410	2.49542814		59.00000000	0.58203390	5.19613912	1.282007
60	0.28937873	8.94615270	2.58882631		60.00000000	0.57233333	5.12018140	1.303381
61	0.29950190	8.94225600	2.67822266		61.00000000	0.56295082	5.03405034	1.324748
62	0.30930725	8.93900680	2.76489961		62.00000000	0.55387097	4.95105635	1.346118
63	0.31945646	8.93664740	2.85486974		63.00000000	0.54507937	4.87118209	1.367586
64	0.32928115	8.94447900	2.94524833		64.00000000	0.53656250	4.79927201	1.388968
65	0.33944225	8.93279270	3.03216725		65.00000000	0.52830769	4.71926310	1.410328
66	0.34926993	8.94980720	3.12589853		66.00000000	0.52030303	4.65661181	1.431701
67	0.35941765	8.92885590	3.20918840		67.00000000	0.51253731	4.57637182	1.453171
68	0.36957431	8.93920710	3.30370130		68.00000000	0.50500000	4.51429959	1.474554
69	0.37936997	8.93556400	3.38988465		69.00000000	0.49768116	4.44706185	1.495952
70	0.38954598	8.92823120	3.47795657		70.00000000	0.49057143	4.37993513	1.517296
71	0.39935282	8.93310260	3.56745971		71.00000000	0.48366197	4.32060202	1.538773
72	0.40949532	8.93288420	3.65797427		72.00000000	0.47694444	4.26048949	1.560165
73	0.41932598	8.92896080	3.74414524		73.00000000	0.47041096	4.20028101	1.581550
74	0.42944393	8.92726710	3.83376067		74.00000000	0.46405405	4.14273449	1.603036
75	0.43927905	8.91312220	3.91534785		75.00000000	0.45786667	4.08102155	1.624423
76	0.44944686	8.91190050	4.00542570		76.00000000	0.45184211	4.02677188	1.645781
77	0.45957002	8.93355850	4.10559566		77.00000000	0.44597403	3.98413505	1.667148
78	0.46942076	8.89562610	4.17579156		78.00000000	0.44025641	3.91635641	1.688622
79	0.47959006	8.91479590	4.27544750		79.00000000	0.43468354	3.87511508	1.710018
80	0.48939168	8.88016130	4.34587706		80.00000000	0.42925000	3.81180924	1.731381
81	0.49952972	8.86212350	4.42689407		81.00000000	0.42395062	3.75710273	1.752758
82	0.50935072	8.84993460	4.50772056		82.00000000	0.41878049	3.70617993	1.774231
83	0.51950812	8.79014300	4.56655066		83.00000000	0.41373494	3.63678928	1.795619
84	0.52928066	8.76661590	4.64000025		84.00000000	0.40880952	3.58387607	1.816981
85	0.53941727	8.65238090	4.66724368		85.00000000	0.40400000	3.49556188	1.838351
86	0.54953295	8.57265190	4.71095469		86.00000000	0.39930233	3.42307984	1.859840
87	0.55937034	8.40222640	4.69995624		87.00000000	0.39471264	3.31646500	1.881214
88	0.56947708	8.21785160	4.67987813		88.00000000	0.39022727	3.20682982	1.902555
89	0.57931370	7.92141340	4.58898331		89.00000000	0.38584270	3.05641951	1.923936
90	0.58943093	7.53629590	4.44212590		90.00000000	0.38155556	2.87551557	1.945427
91	0.59921837	7.02446940	4.20919110		91.00000000	0.37736264	2.65077230	1.966799
92	0.60932517	6.36824610	3.88033264		92.00000000	0.37326087	2.37701708	1.988257
93	0.61914909	5.55216410	3.43761735		93.00000000	0.36924731	2.05012167	2.009650
94	0.62922835	4.49372480	2.82757904		94.00000000	0.36531915	1.64164372	2.031136
95	0.63936269	3.19789150	2.04461251		95.00000000	0.36147368	1.15595362	2.052510
96	0.64910030	1.68112600	1.09121939		96.00000000	0.35770833	0.60135278	2.073921
97	0.65922123	-0.17966519	-0.11843911		97.00000000	0.35402062	-0.06360518	2.095312
98	0.66900724	-2.28699800	-1.53001822		98.00000000	0.35040816	-0.80138277	2.116797
99	0.67902392	-4.83570530	-3.28355957		99.00000000	0.34686869	-1.67735475	2.138179
100	0.68891191	-7.71338940	-5.31384582		100.00000000	0.34340000	-2.64877792	2.159561
101	0.69585991	-9.99627880	-6.95600967		101.00000000	0.34000000	-3.39873479	2.180905
