# Supplementary material for: Study on the Electrical Injection Regeneration of Industrialized B-Doped Czochralski Silicon PERC Solar Cells
Source: Hindawi journal article supplement (doi:10.1155/2019/5357370), 2019-06-20
Supplement: f1 [file 5357370.f1.zip › section3.1/IVRawData_1-10-12h.csv]

02:50 03/04/2018
Test Lot:	JK-PERC
Recipe:	Recipe_YJX-LID
Cell Name:	1-10-12h
Test Order:	2
Test Condition:	Light
1	-0.29978076	8.94936370	-2.68284705		1.00000000	34.34000000	307.32114946	0.000000
2	-0.29000425	8.93815900	-2.59210410		2.00000000	17.17000000	153.46819003	0.061827
3	-0.27987123	8.94024660	-2.50211781		3.00000000	11.44666667	102.33602275	0.083249
4	-0.27000612	8.92485050	-2.40976426		4.00000000	8.58500000	76.61984154	0.104744
5	-0.25992593	8.96152110	-2.32933171		5.00000000	6.86800000	61.54772691	0.126137
6	-0.24971774	8.93914220	-2.23226239		6.00000000	5.72333333	51.16169052	0.147530
7	-0.23991071	8.94664670	-2.14639636		7.00000000	4.90571429	43.88969253	0.168867
8	-0.22974567	8.93871310	-2.05363063		8.00000000	4.29250000	38.36942598	0.190349
9	-0.21992971	8.93341160	-1.96472262		9.00000000	3.81555556	34.08592826	0.211727
10	-0.20978104	8.95569520	-1.87873505		10.00000000	3.43400000	30.75385732	0.233108
11	-0.19998147	8.93203640	-1.78624177		11.00000000	3.12181818	27.88419363	0.254582
12	-0.18983875	8.94253160	-1.69763902		12.00000000	2.86166667	25.59054460	0.275956
13	-0.18005182	8.93328760	-1.60845469		13.00000000	2.64153846	23.59762278	0.297309
14	-0.16987190	8.93811610	-1.51833476		14.00000000	2.45285714	21.92392192	0.318700
15	-0.16007528	8.94440080	-1.43177746		15.00000000	2.28933333	20.47671490	0.340181
16	-0.14990726	8.93067260	-1.33877266		16.00000000	2.14625000	19.16745607	0.361569
17	-0.13974372	8.94337080	-1.24977990		17.00000000	2.02000000	18.06560902	0.382913
18	-0.12993222	8.94771480	-1.16259645		18.00000000	1.90777778	17.07025146	0.404328
19	-0.11979770	8.94013020	-1.07100704		19.00000000	1.80736842	16.15810900	0.425821
20	-0.10997131	8.93141370	-0.98219926		20.00000000	1.71700000	15.33523732	0.447205
21	-0.09982339	8.94365310	-0.89278580		21.00000000	1.63523810	14.62500226	0.468546
22	-0.09000595	8.93816760	-0.80448826		22.00000000	1.56090909	13.95166706	0.489924
23	-0.07982528	8.94083600	-0.71370469		23.00000000	1.49304348	13.34905688	0.511402
24	-0.07001751	8.94617080	-0.62638859		24.00000000	1.43083333	12.80047939	0.532795
25	-0.05989266	8.94278530	-0.53560718		25.00000000	1.37360000	12.28380989	0.554155
26	-0.04972687	8.93663220	-0.44439078		26.00000000	1.32076923	11.80322884	0.575529
27	-0.03989305	8.94370270	-0.35679158		27.00000000	1.27185185	11.37506484	0.597011
28	-0.02977639	8.93852620	-0.26615705		28.00000000	1.22642857	10.96246392	0.618388
29	-0.01994927	8.94418720	-0.17842998		29.00000000	1.18413793	10.59115133	0.639733
30	-0.00980879	8.93566890	-0.08764809		30.00000000	1.14466667	10.22836233	0.661114
31	-0.00062475	8.94177530	-0.00558637		31.00000000	1.10774194	9.90517948	0.682717
32	0.00951105	8.93739320	0.08500403		32.00000000	1.07312500	9.59094008	0.704088
33	0.01931259	8.94183730	0.17269006		33.00000000	1.04060606	9.30493009	0.725462
34	0.02947362	8.93069930	0.26322005		34.00000000	1.01000000	9.02000629	0.746823
35	0.03928930	8.93660350	0.35111289		35.00000000	0.98114286	8.76808469	0.768284
36	0.04938781	8.93042760	0.44105425		36.00000000	0.95388889	8.51863566	0.789669
37	0.05924964	8.93418880	0.52934743		37.00000000	0.92810811	8.29189306	0.811058
38	0.06940248	8.94155880	0.62056635		38.00000000	0.90368421	8.08034551	0.832419
39	0.07955160	8.93192580	0.71054899		39.00000000	0.88051282	7.86467518	0.853894
40	0.08937323	8.94104100	0.79908972		40.00000000	0.85850000	7.67588370	0.875274
41	0.09950375	8.93747140	0.88931190		41.00000000	0.83756098	7.48567727	0.896676
42	0.10934473	8.93364520	0.97684702		42.00000000	0.81761905	7.30431848	0.918150
43	0.11947822	8.94431210	1.06865049		43.00000000	0.79860465	7.14296924	0.939535
44	0.12930879	8.93251320	1.15505247		44.00000000	0.78045455	6.97142053	0.960898
45	0.13944526	8.92914100	1.24512639		45.00000000	0.76311111	6.81392671	0.982271
46	0.14927508	8.93698600	1.33406930		46.00000000	0.74652174	6.67165433	1.003762
47	0.15941824	8.93295380	1.42407577		47.00000000	0.73063830	6.52675816	1.025151
48	0.16956140	8.93740840	1.51543948		48.00000000	0.71541667	6.39397093	1.046497
49	0.17937560	8.93563940	1.60283568		49.00000000	0.70081633	6.26224198	1.067872
50	0.18954481	8.93564890	1.69370587		50.00000000	0.68680000	6.13700366	1.089349
51	0.19933072	8.93029210	1.78008155		51.00000000	0.67333333	6.01306335	1.110721
52	0.20949174	8.93497470	1.87180340		52.00000000	0.66038462	5.90051983	1.132073
53	0.21931115	8.93887520	1.96039500		53.00000000	0.64792453	5.79171650	1.153453
54	0.22945803	8.93970110	2.05128620		54.00000000	0.63592593	5.68498770	1.174931
55	0.23926926	8.93820570	2.13863786		55.00000000	0.62436364	5.58069061	1.196317
56	0.24942358	8.92815590	2.22689261		56.00000000	0.61321429	5.47487274	1.217660
57	0.25955781	8.93526840	2.31921870		57.00000000	0.60245614	5.38310731	1.239031
58	0.26939583	8.93154240	2.40612028		58.00000000	0.59206897	5.28808907	1.260517
59	0.27952856	8.92307000	2.49425291		59.00000000	0.58203390	5.19352922	1.281903
60	0.28935912	8.94671540	2.58881370		60.00000000	0.57233333	5.12050345	1.303259
61	0.29952389	8.93309590	2.67567563		61.00000000	0.56295082	5.02889366	1.324641
62	0.30931872	8.93358330	2.76332455		62.00000000	0.55387097	4.94805243	1.346121
63	0.31946337	8.94974710	2.85911637		63.00000000	0.54507937	4.87832247	1.367495
64	0.32927907	8.92386910	2.93844332		64.00000000	0.53656250	4.78821351	1.388873
65	0.33944455	8.94065760	3.03485750		65.00000000	0.52830769	4.72341818	1.410236
66	0.34926322	8.93381500	3.12025299		66.00000000	0.52030303	4.64829102	1.431705
67	0.35940489	8.92846680	3.20893463		67.00000000	0.51253731	4.57617239	1.453096
68	0.36955476	8.92631240	3.29876124		68.00000000	0.50500000	4.50778776	1.474477
69	0.37936300	8.93293090	3.38882347		69.00000000	0.49768116	4.44575141	1.495832
70	0.38953593	8.93379020	3.48003227		70.00000000	0.49057143	4.38266222	1.517306
71	0.39933524	8.92394260	3.56364476		71.00000000	0.48366197	4.31617167	1.538684
72	0.40949699	8.93145370	3.65740341		72.00000000	0.47694444	4.25980722	1.560078
73	0.41929036	8.91592880	3.73836300		73.00000000	0.47041096	4.19415062	1.581555
74	0.42948264	8.93113520	3.83576752		74.00000000	0.46405405	4.14452950	1.602932
75	0.43927526	8.91283130	3.91518629		75.00000000	0.45786667	4.08088836	1.624287
76	0.44940203	8.92572500	4.01123893		76.00000000	0.45184211	4.03301838	1.645670
77	0.45957202	8.90953920	4.09457493		77.00000000	0.44597403	3.97342307	1.667152
78	0.46944126	8.90451240	4.18014552		78.00000000	0.44025641	3.92026866	1.688532
79	0.47957253	8.90927220	4.27264221		79.00000000	0.43468354	3.87271402	1.709919
80	0.48937556	8.87680530	4.34409156		80.00000000	0.42925000	3.81036868	1.731298
81	0.49952245	8.86367990	4.42760710		81.00000000	0.42395062	3.75776257	1.752793
82	0.50934112	8.84434800	4.50479012		82.00000000	0.41878049	3.70384037	1.774175
83	0.51949543	8.79358770	4.56822862		83.00000000	0.41373494	3.63821448	1.795538
84	0.52929026	8.74866680	4.63058413		84.00000000	0.40880952	3.57653831	1.816918
85	0.53941411	8.66752530	4.67538545		85.00000000	0.40400000	3.50168022	1.838404
86	0.54953569	8.54930400	4.69814767		86.00000000	0.39930233	3.41375697	1.859797
87	0.55935359	8.41591070	4.70746986		87.00000000	0.39471264	3.32186636	1.881147
88	0.56950343	8.18228910	4.65984171		88.00000000	0.39022727	3.19295236	1.902515
89	0.57930946	7.90946580	4.58202836		89.00000000	0.38584270	3.05180961	1.923989
90	0.58940870	7.51892140	4.43171769		90.00000000	0.38155556	2.86888623	1.945360
91	0.59923851	7.01371570	4.20288855		91.00000000	0.37736264	2.64671425	1.966700
92	0.60931396	6.35603240	3.87281927		92.00000000	0.37326087	2.37245818	1.988178
93	0.61911845	5.51520820	3.41456715		93.00000000	0.36924731	2.03647580	2.009688
94	0.62924826	4.47375250	2.81510098		94.00000000	0.36531915	1.63434746	2.031130
95	0.63932812	3.16497680	2.02345867		95.00000000	0.36147368	1.14405582	2.052564
96	0.64910513	1.67431190	1.08680444		96.00000000	0.35770833	0.59891532	2.073940
97	0.65919393	-0.18846707	-0.12423635		97.00000000	0.35402062	-0.06672123	2.095422
98	0.66898209	-2.26244900	-1.51353786		98.00000000	0.35040816	-0.79278060	2.116799
99	0.67899275	-4.79395960	-3.25506381		99.00000000	0.34686869	-1.66287447	2.138170
100	0.68892604	-7.63929180	-5.26290705		100.00000000	0.34340000	-2.62333280	2.159535
101	0.69616205	-9.99578860	-6.95868868		101.00000000	0.34000000	-3.39856812	2.181009
02:50 03/04/2018
Test Lot:	JK-PERC
Recipe:	Recipe_YJX-LID
Cell Name:	1-10-12h
Test Order:	3
Test Condition:	Light
1	-0.29985371	8.94604780	-2.68250562		1.00000000	34.34000000	307.20728145	0.000000
2	-0.28998268	8.92949770	-2.58939967		2.00000000	17.17000000	153.31947551	0.021499
3	-0.27984518	8.92863850	-2.49863645		3.00000000	11.44666667	102.20314870	0.042896
4	-0.27007312	8.93859290	-2.41407367		4.00000000	8.58500000	76.73782005	0.064274
5	-0.25994679	8.94384670	-2.32492424		5.00000000	6.86800000	61.42633914	0.085777
6	-0.24977058	8.93407540	-2.23146919		6.00000000	5.72333333	51.13269154	0.107164
7	-0.23992410	8.94845770	-2.14695066		7.00000000	4.90571429	43.89857677	0.128507
8	-0.22978437	8.93080620	-2.05215968		8.00000000	4.29250000	38.33548561	0.149877
9	-0.21994236	8.94617940	-1.96764381		9.00000000	3.81555556	34.13464451	0.171406
10	-0.20980337	8.93475150	-1.87454097		10.00000000	3.43400000	30.68193665	0.192787
11	-0.19998592	8.94770810	-1.78941564		11.00000000	3.12181818	27.93311783	0.214135
12	-0.18984024	8.93283750	-1.69581201		12.00000000	2.86166667	25.56280331	0.235512
13	-0.18005776	8.93819240	-1.60939090		13.00000000	2.64153846	23.61057900	0.256999
14	-0.16990612	8.93395900	-1.51793431		14.00000000	2.45285714	21.91372515	0.278390
15	-0.16009687	8.93426610	-1.43034804		15.00000000	2.28933333	20.45351319	0.299736
16	-0.14989983	8.93467140	-1.33930572		16.00000000	2.14625000	19.17603849	0.321105
17	-0.13974744	8.95813660	-1.25187666		17.00000000	2.02000000	18.09543593	0.342580
18	-0.12995529	8.91654970	-1.15875280		18.00000000	1.90777778	17.01079537	0.363961
19	-0.11980663	8.94147210	-1.07124764		19.00000000	1.80736842	16.16053431	0.385306
20	-0.10997801	8.94030670	-0.98323714		20.00000000	1.71700000	15.35050660	0.406685
21	-0.09985243	8.92520430	-0.89120332		21.00000000	1.63523810	14.59483408	0.428161
22	-0.09002382	8.93402860	-0.80427535		22.00000000	1.56090909	13.94520646	0.449528
23	-0.07986175	8.93680100	-0.71370859		23.00000000	1.49304348	13.34303245	0.470880
24	-0.07005100	8.93088340	-0.62561731		24.00000000	1.43083333	12.77860566	0.492250
25	-0.05989043	8.93782900	-0.53529040		25.00000000	1.37360000	12.27700191	0.513713
26	-0.04973581	8.93779180	-0.44452829		26.00000000	1.32076923	11.80476040	0.535106
27	-0.03990645	8.93469140	-0.35655182		27.00000000	1.27185185	11.36360380	0.556469
28	-0.02977937	8.93140890	-0.26597172		28.00000000	1.22642857	10.95373506	0.577829
29	-0.01995820	8.92897220	-0.17820621		29.00000000	1.18413793	10.57313467	0.599308
30	-0.00980209	8.93314270	-0.08756348		30.00000000	1.14466667	10.22547068	0.620683
31	-0.00063666	8.94505980	-0.00569495		31.00000000	1.10774194	9.90881786	0.642191
32	0.00950957	8.92999550	0.08492038		32.00000000	1.07312500	9.58300142	0.663541
33	0.01931855	8.93693920	0.17264868		33.00000000	1.04060606	9.29983309	0.685020
34	0.02947362	8.93735500	0.26341621		34.00000000	1.01000000	9.02672855	0.706404
35	0.03928186	8.94049070	0.35119907		35.00000000	0.98114286	8.77189859	0.727781
36	0.04941386	8.94092080	0.44180541		36.00000000	0.95388889	8.52864501	0.749256
37	0.05923922	8.93214130	0.52913305		37.00000000	0.92810811	8.28999276	0.770647
38	0.06938238	8.95026970	0.62099105		38.00000000	0.90368421	8.08821741	0.791999
39	0.07953746	8.93320080	0.71052409		39.00000000	0.88051282	7.86579783	0.813377
40	0.08936430	8.93729310	0.79867492		40.00000000	0.85850000	7.67266613	0.834863
41	0.09950523	8.93700790	0.88927904		41.00000000	0.83756098	7.48528906	0.856241
42	0.10929710	8.93805410	0.97690339		42.00000000	0.81761905	7.30792328	0.877601
43	0.11945663	8.93304440	1.06711138		43.00000000	0.79860465	7.13397081	0.898980
44	0.12928051	8.93745990	1.15543937		44.00000000	0.78045455	6.97528120	0.920459
45	0.13941176	8.91537670	1.24290836		45.00000000	0.76311111	6.80342302	0.941844
46	0.14926688	8.93503000	1.33370405		46.00000000	0.74652174	6.67019413	0.963195
47	0.15940335	8.93853470	1.42483238		47.00000000	0.73063830	6.53083578	0.984565
48	0.16957183	8.92851350	1.51402437		48.00000000	0.71541667	6.38760737	1.006045
49	0.17940463	8.94189740	1.60421779		49.00000000	0.70081633	6.26662769	1.027422
50	0.18952100	8.93061260	1.69253863		50.00000000	0.68680000	6.13354473	1.048760
51	0.19932552	8.94485760	1.78293839		51.00000000	0.67333333	6.02287078	1.070133
52	0.20945156	8.93305400	1.87104210		52.00000000	0.66038462	5.89925143	1.091610
53	0.21931040	8.93242170	1.95897298		53.00000000	0.64792453	5.78753512	1.112990
54	0.22943869	8.92978000	2.04883703		54.00000000	0.63592593	5.67867861	1.134347
55	0.23927149	8.92704300	2.13598688		55.00000000	0.62436364	5.57372103	1.155717
56	0.24938861	8.94552040	2.23091090		56.00000000	0.61321429	5.48552090	1.177246
57	0.25956228	8.92749880	2.31724194		57.00000000	0.60245614	5.37842647	1.198618
58	0.26937351	8.92710020	2.40472431		58.00000000	0.59206897	5.28545898	1.219985
59	0.27951890	8.92497060	2.49469796		59.00000000	0.58203390	5.19463543	1.241358
60	0.28935692	8.93941400	2.58668130		60.00000000	0.57233333	5.11632461	1.262877
61	0.29950082	8.92782210	2.67389004		61.00000000	0.56295082	5.02592477	1.284257
62	0.30932319	8.92570780	2.76092841		62.00000000	0.55387097	4.94369042	1.305656
63	0.31943211	8.93338300	2.85360938		63.00000000	0.54507937	4.86940273	1.326996
64	0.32928503	8.93333820	2.94161454		64.00000000	0.53656250	4.79329428	1.348476
65	0.33943266	8.92845630	3.03060967		65.00000000	0.52830769	4.71697214	1.369870
66	0.34922600	8.93417550	3.12004637		66.00000000	0.52030303	4.64847859	1.391245
67	0.35937959	8.93009380	3.20929345		67.00000000	0.51253731	4.57700628	1.412724
68	0.36954880	8.92605500	3.29861291		68.00000000	0.50500000	4.50765778	1.434120
69	0.37936449	8.92956450	3.38755968		69.00000000	0.49768116	4.44407601	1.455465
70	0.38949797	8.93237300	3.47914115		70.00000000	0.49057143	4.38196698	1.476842
71	0.39932555	8.92694470	3.56475710		71.00000000	0.48366197	4.31762368	1.498324
72	0.40947542	8.92635540	3.65512313		72.00000000	0.47694444	4.25737562	1.519712
73	0.41931865	8.91906450	3.73993009		73.00000000	0.47041096	4.19562568	1.541060
74	0.42945585	8.93006230	3.83506750		74.00000000	0.46405405	4.14403161	1.562428
75	0.43926483	8.92716310	3.92138878		75.00000000	0.45786667	4.08745041	1.583891
76	0.44943777	8.92169950	4.00974873		76.00000000	0.45184211	4.03119948	1.605274
77	0.45956010	8.91023640	4.09478913		77.00000000	0.44597403	3.97373400	1.626616
78	0.46943086	8.90511130	4.18033406		78.00000000	0.44025641	3.92053233	1.647990
79	0.47954202	8.89915560	4.26751905		79.00000000	0.43468354	3.86831650	1.669465
80	0.48936588	8.86812020	4.33975545		80.00000000	0.42925000	3.80664060	1.690848
81	0.49952617	8.85933400	4.42546918		81.00000000	0.42395062	3.75592012	1.712190
82	0.50932473	8.84067340	4.50277359		82.00000000	0.41878049	3.70230152	1.733571
83	0.51950061	8.79079440	4.56682305		83.00000000	0.41373494	3.63705879	1.755040
84	0.52925676	8.74545860	4.62859308		84.00000000	0.40880952	3.57522677	1.776454
85	0.53939325	8.67716410	4.68040374		85.00000000	0.40400000	3.50557430	1.797808
86	0.54953343	8.56664180	4.70765605		86.00000000	0.39930233	3.42067999	1.819184
87	0.55934316	8.40162750	4.69939287		87.00000000	0.39471264	3.31622860	1.840648
88	0.56948930	8.20884040	4.67484677		88.00000000	0.39022727	3.20331340	1.862026
89	0.57930350	7.91343360	4.58427978		89.00000000	0.38584270	3.05334056	1.883390
90	0.58942062	7.53047370	4.43861648		90.00000000	0.38155556	2.87329408	1.904762
91	0.59919757	7.02602480	4.20997699		91.00000000	0.37736264	2.65135925	1.926236
92	0.60930353	6.35218430	3.87040832		92.00000000	0.37326087	2.37102184	1.947603
93	0.61908573	5.53462310	3.42640618		93.00000000	0.36924731	2.04364470	1.968991
94	0.62924004	4.47615580	2.81657645		94.00000000	0.36531915	1.63522543	1.990448
95	0.63936907	3.17853880	2.03225940		95.00000000	0.36147368	1.14895813	2.011947
96	0.64910287	1.66155790	1.07852200		96.00000000	0.35770833	0.59435311	2.033336
97	0.65913737	-0.20088463	-0.13241057		97.00000000	0.35402062	-0.07111730	2.054727
98	0.66898137	-2.31705500	-1.55006663		98.00000000	0.35040816	-0.81191499	2.076209
99	0.67898309	-4.85583590	-3.29703046		99.00000000	0.34686869	-1.68433742	2.097587
100	0.68889403	-7.72849080	-5.32411117		100.00000000	0.34340000	-2.65396374	2.118940
101	0.69574445	-9.99664120	-6.95510763		101.00000000	0.34000000	-3.39885801	2.140316
02:50 03/04/2018
Test Lot:	JK-PERC
Recipe:	Recipe_YJX-LID
Cell Name:	1-10-12h
Test Order:	4
Test Condition:	Light
1	-0.29979879	8.93808270	-2.67962638		1.00000000	34.34000000	306.93375992	0.000000
2	-0.28999844	8.93709950	-2.59174491		2.00000000	17.17000000	153.44999842	0.061791
3	-0.27984607	8.94329930	-2.50274716		3.00000000	11.44666667	102.37096599	0.083200
4	-0.27003008	8.93834590	-2.41362226		4.00000000	8.58500000	76.73569955	0.104704
5	-0.25986430	8.94312760	-2.32399959		5.00000000	6.86800000	61.42140036	0.126103
6	-0.24972084	8.93532370	-2.23133654		6.00000000	5.72333333	51.13983598	0.147483
7	-0.23994805	8.93550780	-2.14405767		7.00000000	4.90571429	43.83504826	0.168845
8	-0.22974654	8.94582940	-2.05527335		8.00000000	4.29250000	38.39997270	0.190323
9	-0.21992387	8.93835450	-1.96575751		9.00000000	3.81555556	34.10478817	0.211702
10	-0.20976999	8.93579100	-1.87446079		10.00000000	3.43400000	30.68550629	0.233085
11	-0.19995700	8.93968490	-1.78755257		11.00000000	3.12181818	27.90807086	0.254429
12	-0.18982247	8.93670080	-1.69638662		12.00000000	2.86166667	25.57385879	0.275901
13	-0.18001395	8.95200060	-1.61148499		13.00000000	2.64153846	23.64705389	0.297276
14	-0.16988315	8.92253880	-1.51578900		14.00000000	2.45285714	21.88571303	0.318662
15	-0.16007015	8.94549560	-1.43190682		15.00000000	2.28933333	20.47922126	0.340136
16	-0.14991628	8.93020530	-1.33878316		16.00000000	2.14625000	19.16645313	0.361521
17	-0.13975048	8.94429680	-1.24996977		17.00000000	2.02000000	18.06747954	0.382872
18	-0.12991740	8.93030930	-1.16020257		18.00000000	1.90777778	17.03704563	0.404242
19	-0.11976427	8.93224330	-1.06976360		19.00000000	1.80736842	16.14385447	0.425709
20	-0.10996840	8.93759160	-0.98285265		20.00000000	1.71700000	15.34584478	0.447098
21	-0.09979516	8.94173050	-0.89234145		21.00000000	1.63523810	14.62185835	0.468455
22	-0.08996059	8.93859290	-0.80412109		22.00000000	1.56090909	13.95233092	0.489832
23	-0.07984690	8.93693730	-0.71358677		23.00000000	1.49304348	13.34323595	0.511317
24	-0.07004434	8.94397640	-0.62647491		24.00000000	1.43083333	12.79733957	0.532689
25	-0.05986143	8.93731120	-0.53500022		25.00000000	1.37360000	12.27629066	0.554033
26	-0.04972541	8.93428900	-0.44426121		26.00000000	1.32076923	11.80013401	0.575417
27	-0.03990424	8.93646720	-0.35660291		27.00000000	1.27185185	11.36586236	0.596888
28	-0.02976822	8.93252180	-0.26590528		28.00000000	1.22642857	10.95509995	0.618281
29	-0.01992844	8.93799210	-0.17812023		29.00000000	1.18413793	10.58381547	0.639621
30	-0.00978795	8.94546220	-0.08755778		30.00000000	1.14466667	10.23957240	0.660990
31	-0.00061135	8.93196770	-0.00546059		31.00000000	1.10774194	9.89431519	0.682570
32	0.00948054	8.92905900	0.08465232		32.00000000	1.07312500	9.58199644	0.703942
33	0.01931781	8.94721220	0.17284055		33.00000000	1.04060606	9.31052324	0.725290
34	0.02946396	8.92772100	0.26304601		34.00000000	1.01000000	9.01699821	0.746668
35	0.03928188	8.93426610	0.35095476		35.00000000	0.98114286	8.76579137	0.768150
36	0.04945780	8.94226650	0.44226479		36.00000000	0.95388889	8.52992866	0.789526
37	0.05929060	8.93106170	0.52952800		37.00000000	0.92810811	8.28899078	0.810894
38	0.06942484	8.94001960	0.62065941		38.00000000	0.90368421	8.07895455	0.832259
39	0.07956280	8.92331310	0.70996376		39.00000000	0.88051282	7.85709159	0.853731
40	0.08938816	8.93241880	0.79845250		40.00000000	0.85850000	7.66848154	0.875119
41	0.09953655	8.94399360	0.89025423		41.00000000	0.83756098	7.49114001	0.896509
42	0.10933362	8.93587490	0.97699155		42.00000000	0.81761905	7.30614153	0.917856
43	0.11948275	8.94342800	1.06858537		43.00000000	0.79860465	7.14226320	0.939336
44	0.12929769	8.94107820	1.15606076		44.00000000	0.78045455	6.97810512	0.960711
45	0.13946393	8.91563030	1.24340884		45.00000000	0.76311111	6.80361654	0.982091
46	0.14928557	8.96051500	1.33767559		46.00000000	0.74652174	6.68921924	1.003568
47	0.15943246	8.92747400	1.42332914		47.00000000	0.73063830	6.52275441	1.024933
48	0.16957712	8.94572070	1.51698955		48.00000000	0.71541667	6.39991768	1.046291
49	0.17940769	8.93105030	1.60229910		49.00000000	0.70081633	6.25902586	1.067669
50	0.18955235	8.93825440	1.69426713		50.00000000	0.68680000	6.13879312	1.089145
51	0.19933827	8.94137000	1.78235723		51.00000000	0.67333333	6.02052247	1.110537
52	0.20950153	8.93374540	1.87163333		52.00000000	0.66038462	5.89970802	1.131878
53	0.21931201	8.93209460	1.95891562		53.00000000	0.64792453	5.78732318	1.153255
54	0.22944550	8.93776700	2.05073042		54.00000000	0.63592593	5.68375776	1.174734
55	0.23928575	8.93697070	2.13848974		55.00000000	0.62436364	5.57991952	1.196114
56	0.24941850	8.93439770	2.22840407		56.00000000	0.61321429	5.47870030	1.217473
57	0.25958252	8.94538690	2.32206607		57.00000000	0.60245614	5.38920327	1.238845
58	0.26942128	8.93645860	2.40767211		58.00000000	0.59206897	5.29099980	1.260323
59	0.27953392	8.94285010	2.49982994		59.00000000	0.58203390	5.20504191	1.281706
60	0.28937492	8.92882540	2.58377814		60.00000000	0.57233333	5.11026440	1.303050
61	0.29953521	8.93715290	2.67699197		61.00000000	0.56295082	5.03117755	1.324424
62	0.30931368	8.93545910	2.76385974		62.00000000	0.55387097	4.94909138	1.345892
63	0.31951118	8.92392250	2.85129301		63.00000000	0.54507937	4.86424601	1.367280
64	0.32929635	8.94102950	2.94424838		64.00000000	0.53656250	4.79742114	1.388628
65	0.33943877	8.93668080	3.03345594		65.00000000	0.52830769	4.72131721	1.410005
66	0.34925520	8.92673780	3.11770960		66.00000000	0.52030303	4.64460873	1.431477
67	0.35938424	8.91695690	3.20461378		67.00000000	0.51253731	4.57027313	1.452862
68	0.36954898	8.93404870	3.30156858		68.00000000	0.50500000	4.51169459	1.474237
69	0.37940189	8.92759420	3.38714611		69.00000000	0.49768116	4.44309543	1.495614
70	0.38950711	8.92123220	3.47488337		70.00000000	0.49057143	4.37650162	1.517094
71	0.39933097	8.93165400	3.56668606		71.00000000	0.48366197	4.31990139	1.538478
72	0.40950838	8.91943170	3.65258203		72.00000000	0.47694444	4.25407340	1.559857
73	0.41932705	8.92704010	3.74334939		73.00000000	0.47041096	4.19937749	1.581214
74	0.42946798	8.91361240	3.82811111		74.00000000	0.46405405	4.13639797	1.602679
75	0.43929929	8.92151260	3.91921415		75.00000000	0.45786667	4.08486324	1.624058
76	0.44945064	8.90277670	4.00135869		76.00000000	0.45184211	4.02264937	1.645453
77	0.45958266	8.91548350	4.09740162		77.00000000	0.44597403	3.97607407	1.666932
78	0.46945715	8.91215710	4.18387587		78.00000000	0.44025641	3.92363429	1.688308
79	0.47957277	8.89985280	4.26812706		79.00000000	0.43468354	3.86861956	1.709663
80	0.48937804	8.86955070	4.34056334		80.00000000	0.42925000	3.80725464	1.731039
81	0.49954504	8.87501910	4.43347177		81.00000000	0.42395062	3.76256983	1.752549
82	0.50938004	8.82587620	4.49572517		82.00000000	0.41878049	3.69610474	1.773931
83	0.51950538	8.79827880	4.57075317		83.00000000	0.41373494	3.64015535	1.795278
84	0.52929950	8.74618150	4.62934949		84.00000000	0.40880952	3.57552229	1.816647
85	0.53939724	8.66090970	4.67167079		85.00000000	0.40400000	3.49900752	1.838122
86	0.54954487	8.55753420	4.70274902		86.00000000	0.39930233	3.41704331	1.859509
87	0.55939257	8.41736220	4.70860987		87.00000000	0.39471264	3.32243929	1.880869
88	0.56949925	8.19993970	4.66985951		88.00000000	0.39022727	3.19984011	1.902245
89	0.57930899	7.92450480	4.59073687		89.00000000	0.38584270	3.05761230	1.923715
90	0.58943951	7.53360030	4.44060167		90.00000000	0.38155556	2.87448705	1.945100
91	0.59923434	7.02827790	4.21158547		91.00000000	0.37736264	2.65220948	1.966453
92	0.60931724	6.37782570	3.88611915		92.00000000	0.37326087	2.38059277	1.987927
93	0.61913890	5.53247690	3.42537166		93.00000000	0.36924731	2.04285222	2.009525
94	0.62925005	4.48675680	2.82329194		94.00000000	0.36531915	1.63909818	2.030930
95	0.63939250	3.17306520	2.02883409		95.00000000	0.36147368	1.14697957	2.052290
96	0.64907938	1.67202340	1.08527591		96.00000000	0.35770833	0.59809670	2.073675
97	0.65923297	-0.19453976	-0.12824702		97.00000000	0.35402062	-0.06887109	2.095159
98	0.66897053	-2.32030890	-1.55221827		98.00000000	0.35040816	-0.81305518	2.116607
99	0.67903107	-4.87279370	-3.30877832		99.00000000	0.34686869	-1.69021955	2.137974
100	0.68892342	-7.77297120	-5.35498190		100.00000000	0.34340000	-2.66923831	2.159340
101	0.69565403	-9.99676130	-6.95428729		101.00000000	0.34000000	-3.39889884	2.180802
