# Supplementary material for: Study on the Electrical Injection Regeneration of Industrialized B-Doped Czochralski Silicon PERC Solar Cells
Source: Hindawi journal article supplement (doi:10.1155/2019/5357370), 2019-06-20
Supplement: f1 [file 5357370.f1.zip › section3.1/IVRawData_1-20-2-1.5h.csv]

01:38 03/04/2018
Test Lot:	JK-PERC
Recipe:	Recipe_YJX-LID
Cell Name:	1-20-2-1.5h
Test Order:	2
Test Condition:	Light
1	-0.29978386	9.11079880	-2.73127043		1.00000000	34.34000000	312.86483079	0.000000
2	-0.28997847	9.10703280	-2.64084344		2.00000000	17.17000000	156.36775318	0.061817
3	-0.27986944	9.09630490	-2.54577776		3.00000000	11.44666667	104.12237009	0.083251
4	-0.27005067	9.10254860	-2.45814935		4.00000000	8.58500000	78.14537973	0.104742
5	-0.25988135	9.09663390	-2.36404550		5.00000000	6.86800000	62.47568163	0.126123
6	-0.24971572	9.12148950	-2.27777932		6.00000000	5.72333333	52.20532491	0.147512
7	-0.23991184	9.10361000	-2.18406383		7.00000000	4.90571429	44.65970963	0.168850
8	-0.22976483	9.10560890	-2.09214868		8.00000000	4.29250000	39.08582620	0.190372
9	-0.21992968	9.09116360	-1.99941670		9.00000000	3.81555556	34.68783978	0.211769
10	-0.20981021	9.10542680	-1.91041151		10.00000000	3.43400000	31.26803563	0.233163
11	-0.19997358	9.09773540	-1.81930672		11.00000000	3.12181818	28.40147579	0.254660
12	-0.18981914	9.09111020	-1.72566672		12.00000000	2.86166667	26.01572702	0.276074
13	-0.18006513	9.10694890	-1.63984394		13.00000000	2.64153846	24.05635579	0.297435
14	-0.16988760	9.10995480	-1.54766836		14.00000000	2.45285714	22.34541770	0.318814
15	-0.16008595	9.09296420	-1.45565581		15.00000000	2.28933333	20.81682604	0.340302
16	-0.14992554	9.10325910	-1.36481104		16.00000000	2.14625000	19.53786984	0.361684
17	-0.13976885	9.10305210	-1.27232312		17.00000000	2.02000000	18.38816524	0.383044
18	-0.12991734	9.08504390	-1.18030474		18.00000000	1.90777778	17.33224486	0.404419
19	-0.11979117	9.10240650	-1.09038792		19.00000000	1.80736842	16.45140206	0.425895
20	-0.10995975	9.10497470	-1.00118074		20.00000000	1.71700000	15.63324156	0.447289
21	-0.09981646	9.09495350	-0.90782610		21.00000000	1.63523810	14.87241444	0.468639
22	-0.08996346	9.10302730	-0.81893981		22.00000000	1.56090909	14.20899807	0.490012
23	-0.07987153	9.09797760	-0.72666937		23.00000000	1.49304348	13.58367612	0.511495
24	-0.07003564	9.11371800	-0.63828511		24.00000000	1.43083333	13.04021151	0.532880
25	-0.05988491	9.09730820	-0.54479151		25.00000000	1.37360000	12.49606254	0.554237
26	-0.04972600	9.09610370	-0.45231283		26.00000000	1.32076923	12.01385389	0.575608
27	-0.03990351	9.10383990	-0.36327514		27.00000000	1.27185185	11.57873564	0.597087
28	-0.02975352	9.08903880	-0.27043092		28.00000000	1.22642857	11.14705687	0.618476
29	-0.02000769	9.10202600	-0.18211055		29.00000000	1.18413793	10.77805424	0.639824
30	-0.00978924	9.10483170	-0.08912934		30.00000000	1.14466667	10.42199735	0.661196
31	-0.00060461	9.09664540	-0.00549988		31.00000000	1.10774194	10.07673558	0.682789
32	0.00950721	9.09543610	0.08647222		32.00000000	1.07312500	9.76053986	0.704173
33	0.01933538	9.09852120	0.17592333		33.00000000	1.04060606	9.46797630	0.725517
34	0.02945009	9.10476300	0.26813608		34.00000000	1.01000000	9.19581063	0.746896
35	0.03928123	9.09694290	0.35733914		35.00000000	0.98114286	8.92540055	0.768381
36	0.04946591	9.11062530	0.45066533		36.00000000	0.95388889	8.69052424	0.789769
37	0.05929184	9.08826640	0.53886004		37.00000000	0.92810811	8.43489373	0.811169
38	0.06944004	9.10765840	0.63243620		38.00000000	0.90368421	8.23044709	0.832513
39	0.07956667	9.09892560	0.72397117		39.00000000	0.88051282	8.01172064	0.853981
40	0.08939260	9.10397720	0.81382821		40.00000000	0.85850000	7.81576443	0.875354
41	0.09950434	9.09798240	0.90528871		41.00000000	0.83756098	7.62011502	0.896758
42	0.10933771	9.09387210	0.99430315		42.00000000	0.81761905	7.43532305	0.918252
43	0.11952016	9.09665580	1.08723376		43.00000000	0.79860465	7.26463163	0.939719
44	0.12933195	9.09914210	1.17680979		44.00000000	0.78045455	7.10146681	0.961095
45	0.13947271	9.10592270	1.27002772		45.00000000	0.76311111	6.94883079	0.982493
46	0.14927036	9.09993170	1.35835008		46.00000000	0.74652174	6.79329684	1.003825
47	0.15942006	9.08843330	1.44887858		47.00000000	0.73063830	6.64035744	1.025314
48	0.16960548	9.11675170	1.54625105		48.00000000	0.71541667	6.52227611	1.046704
49	0.17941205	9.08088680	1.62922052		49.00000000	0.70081633	6.36403373	1.068110
50	0.18953422	9.10934930	1.72653341		50.00000000	0.68680000	6.25630110	1.089476
51	0.19935717	9.09679410	1.81351113		51.00000000	0.67333333	6.12517469	1.110962
52	0.20950834	9.10288520	1.90713037		52.00000000	0.66038462	6.01140534	1.132344
53	0.21929187	9.10004520	1.99556593		53.00000000	0.64792453	5.89614249	1.153742
54	0.22947133	9.09690280	2.08747838		54.00000000	0.63592593	5.78495634	1.175099
55	0.23928311	9.10084440	2.17767835		55.00000000	0.62436364	5.68223630	1.196572
56	0.24945067	9.10350800	2.27087617		56.00000000	0.61321429	5.58240116	1.217958
57	0.25961301	9.09620670	2.36149360		57.00000000	0.60245614	5.48006558	1.239336
58	0.26939949	9.10690880	2.45339659		58.00000000	0.59206897	5.39191807	1.260819
59	0.27954176	9.10372160	2.54487036		59.00000000	0.58203390	5.29867457	1.282207
60	0.28939003	9.10295870	2.63430549		60.00000000	0.57233333	5.20992670	1.303563
61	0.29950398	9.09809590	2.72491593		61.00000000	0.56295082	5.12178054	1.324935
62	0.30934778	9.10638140	2.81703887		62.00000000	0.55387097	5.04376028	1.346418
63	0.31950417	9.09271050	2.90515892		63.00000000	0.54507937	4.95624887	1.367797
64	0.32932639	9.11109920	3.00052541		64.00000000	0.53656250	4.88867416	1.389143
65	0.33943665	9.09699920	3.08785493		65.00000000	0.52830769	4.80601465	1.410532
66	0.34923130	9.09197810	3.17520333		66.00000000	0.52030303	4.73058376	1.432005
67	0.35936686	9.10464950	3.27190930		67.00000000	0.51253731	4.66647259	1.453387
68	0.36956421	9.09655860	3.36176249		68.00000000	0.50500000	4.59376209	1.474741
69	0.37938267	9.08528610	3.44680010		69.00000000	0.49768116	4.52157572	1.496124
70	0.38951153	9.11509800	3.55043577		70.00000000	0.49057143	4.47160665	1.517605
71	0.39937246	9.08994670	3.63027437		71.00000000	0.48366197	4.39646154	1.538983
72	0.40953183	9.09479140	3.72460657		72.00000000	0.47694444	4.33771023	1.560325
73	0.41936371	9.09945960	3.81598314		73.00000000	0.47041096	4.28048552	1.581708
74	0.42950967	9.10305600	3.90985058		74.00000000	0.46405405	4.22431004	1.603197
75	0.43929839	9.10092260	3.99802065		75.00000000	0.45786667	4.16700909	1.624577
76	0.44946820	9.09053610	4.08590690		76.00000000	0.45184211	4.10748697	1.645931
77	0.45958364	9.08875850	4.17704471		77.00000000	0.44597403	4.05335022	1.667313
78	0.46944010	9.06961250	4.25763980		78.00000000	0.44025641	3.99295504	1.688795
79	0.47959352	9.09287070	4.36088187		79.00000000	0.43468354	3.95252126	1.710185
80	0.48936734	9.07719230	4.44208145		80.00000000	0.42925000	3.89638479	1.731545
81	0.49956021	9.06501100	4.52851880		81.00000000	0.42395062	3.84311701	1.752905
82	0.50937277	9.04881000	4.60921741		82.00000000	0.41878049	3.78946507	1.774394
83	0.51951277	9.02728840	4.68979160		83.00000000	0.41373494	3.73490462	1.795774
84	0.52928364	8.99995610	4.76352952		84.00000000	0.40880952	3.67926777	1.817172
85	0.53944153	8.95994570	4.83336682		85.00000000	0.40400000	3.61981806	1.838510
86	0.54957038	8.88123320	4.88086270		86.00000000	0.39930233	3.54629707	1.859986
87	0.55943722	8.80009650	4.92310152		87.00000000	0.39471264	3.47350935	1.881406
88	0.56955492	8.67010690	4.93810204		88.00000000	0.39022727	3.38331217	1.902787
89	0.57935107	8.51651380	4.93405138		89.00000000	0.38584270	3.28603465	1.924276
90	0.58947325	8.25683020	4.86718053		90.00000000	0.38155556	3.15043943	1.945670
91	0.59925079	7.93683720	4.75615596		91.00000000	0.37736264	2.99506582	1.967021
92	0.60936922	7.46903800	4.55140186		92.00000000	0.37326087	2.78789962	1.988504
93	0.61918026	6.87720390	4.25822890		93.00000000	0.36924731	2.53938905	2.010007
94	0.62930018	6.07707640	3.82430527		94.00000000	0.36531915	2.22007238	2.031410
95	0.63941270	5.02191400	3.21107559		95.00000000	0.36147368	1.81528976	2.052802
96	0.64920139	3.77159050	2.44852180		96.00000000	0.35770833	1.34912935	2.074187
97	0.65930045	2.15986850	1.42400227		97.00000000	0.35402062	0.76463798	2.095664
98	0.66899991	0.26377821	0.17646760		98.00000000	0.35040816	0.09243004	2.117051
99	0.67911458	-2.05151220	-1.39321185		99.00000000	0.34686869	-0.71160534	2.138395
100	0.68880582	-4.65663240	-3.20751550		100.00000000	0.34340000	-1.59908757	2.159771
101	0.69898307	-7.80492450	-5.45551009		101.00000000	0.34000000	-2.65367433	2.181330
01:38 03/04/2018
Test Lot:	JK-PERC
Recipe:	Recipe_YJX-LID
Cell Name:	1-20-2-1.5h
Test Order:	3
Test Condition:	Light
1	-0.29983002	9.10161690	-2.72893798		1.00000000	34.34000000	312.54952435	0.000000
2	-0.28998443	9.11468220	-2.64311592		2.00000000	17.17000000	156.49909337	0.021603
3	-0.27987093	9.08601670	-2.54291194		3.00000000	11.44666667	104.00460449	0.043037
4	-0.27006704	9.10522170	-2.45902027		4.00000000	8.58500000	78.16832829	0.064409
5	-0.25992003	9.10129360	-2.36560851		5.00000000	6.86800000	62.50768444	0.085798
6	-0.24974178	9.11025810	-2.27521207		6.00000000	5.72333333	52.14104386	0.107292
7	-0.23994385	9.10108660	-2.18374976		7.00000000	4.90571429	44.64733055	0.128683
8	-0.22978047	9.10042570	-2.09110009		8.00000000	4.29250000	39.06357732	0.150021
9	-0.21993564	9.10085110	-2.00160151		9.00000000	3.81555556	34.72480297	0.171389
10	-0.20978193	9.10276510	-1.90959563		10.00000000	3.43400000	31.25889535	0.192872
11	-0.19996689	9.11132140	-1.82196260		11.00000000	3.12181818	28.44388881	0.214245
12	-0.18985635	9.09030440	-1.72585201		12.00000000	2.86166667	26.01342109	0.235616
13	-0.18001451	9.10154060	-1.63840937		13.00000000	2.64153846	24.04206955	0.257001
14	-0.16989802	9.10069080	-1.54618935		14.00000000	2.45285714	22.32269443	0.278476
15	-0.16006882	9.09282400	-1.45547761		15.00000000	2.28933333	20.81650508	0.299865
16	-0.14993224	9.10365300	-1.36493109		16.00000000	2.14625000	19.53871525	0.321216
17	-0.13977779	9.09245200	-1.27092285		17.00000000	2.02000000	18.36675304	0.342593
18	-0.12993371	9.09874530	-1.18223373		18.00000000	1.90777778	17.35838409	0.364078
19	-0.11978447	9.09365180	-1.08927826		19.00000000	1.80736842	16.43557910	0.385434
20	-0.10998654	9.11388970	-1.00240519		20.00000000	1.71700000	15.64854861	0.406777
21	-0.09981944	9.09680560	-0.90803808		21.00000000	1.63523810	14.87544306	0.428158
22	-0.09000961	9.09676930	-0.81879663		22.00000000	1.56090909	14.19922990	0.449630
23	-0.07986632	9.10146710	-0.72690068		23.00000000	1.49304348	13.58888610	0.471023
24	-0.07003341	9.10395050	-0.63758069		24.00000000	1.43083333	13.02623584	0.492368
25	-0.05991469	9.09619810	-0.54499585		25.00000000	1.37360000	12.49453771	0.513744
26	-0.04974758	9.09883210	-0.45264491		26.00000000	1.32076923	12.01745747	0.535214
27	-0.03993626	9.10497000	-0.36361841		27.00000000	1.27185185	11.58017296	0.556602
28	-0.02979148	9.09683610	-0.27100823		28.00000000	1.22642857	11.15661970	0.577941
29	-0.01993178	9.10419080	-0.18146268		29.00000000	1.18413793	10.78061766	0.599323
30	-0.00982050	9.10801030	-0.08944518		30.00000000	1.14466667	10.42563579	0.620801
31	-0.00061577	9.10742470	-0.00560808		31.00000000	1.10774194	10.08867626	0.642293
32	0.00951614	9.09888550	0.08658628		32.00000000	1.07312500	9.76424150	0.663678
33	0.01935845	9.09000870	0.17596847		33.00000000	1.04060606	9.45911814	0.685027
34	0.02946274	9.09789750	0.26804901		34.00000000	1.01000000	9.18887648	0.706494
35	0.03925965	9.13470840	0.35862545		35.00000000	0.98114286	8.96245390	0.727888
36	0.04942348	9.08839990	0.44918037		36.00000000	0.95388889	8.66932368	0.749270
37	0.05927249	9.09453770	0.53905589		37.00000000	0.92810811	8.44071418	0.770701
38	0.06938870	9.09727480	0.63124803		38.00000000	0.90368421	8.22106360	0.792165
39	0.07955252	9.09608170	0.72361626		39.00000000	0.88051282	8.00921655	0.813534
40	0.08937995	9.09407040	0.81282757		40.00000000	0.85850000	7.80725944	0.834948
41	0.09955122	9.10471630	0.90638564		41.00000000	0.83756098	7.62575507	0.856300
42	0.10933176	9.10052780	0.99497672		42.00000000	0.81761905	7.44076487	0.877784
43	0.11948815	9.09631350	1.08690167		43.00000000	0.79860465	7.26435827	0.899185
44	0.12932228	9.10650160	1.17767355		44.00000000	0.78045455	7.10721057	0.920552
45	0.13945188	9.10064220	1.26910166		45.00000000	0.76311111	6.94480118	0.941906
46	0.14927557	9.10336110	1.35890942		46.00000000	0.74652174	6.79585696	0.963377
47	0.15945578	9.10309220	1.45154067		47.00000000	0.73063830	6.65106779	0.984759
48	0.16957422	9.08772370	1.54104366		48.00000000	0.71541667	6.50150900	1.006178
49	0.17940313	9.11330220	1.63495494		49.00000000	0.70081633	6.38675097	1.027552
50	0.18956175	9.10075280	1.72515463		50.00000000	0.68680000	6.25039702	1.049037
51	0.19934675	9.09506700	1.81307205		51.00000000	0.67333333	6.12401178	1.070418
52	0.20947337	9.10625170	1.90751723		52.00000000	0.66038462	6.01362853	1.091837
53	0.21930972	9.09870150	1.99543368		53.00000000	0.64792453	5.89527188	1.113314
54	0.22946686	9.09948920	2.08803121		54.00000000	0.63592593	5.78660109	1.134692
55	0.23926674	9.09349630	2.17577121		55.00000000	0.62436364	5.67764842	1.156036
56	0.24942984	9.10003380	2.26981997		56.00000000	0.61321429	5.58027073	1.177401
57	0.25957730	9.09837150	2.36173071		57.00000000	0.60245614	5.48136978	1.198882
58	0.26940322	9.09627820	2.45056664		58.00000000	0.59206897	5.38562402	1.220261
59	0.27955961	9.11121650	2.54712813		59.00000000	0.58203390	5.30303686	1.241607
60	0.28938109	9.09201150	2.63105620		60.00000000	0.57233333	5.20366125	1.263001
61	0.29951814	9.10727310	2.72779350		61.00000000	0.56295082	5.12694686	1.284475
62	0.30933738	9.09769340	2.81425664		62.00000000	0.55387097	5.03894825	1.305854
63	0.31948036	9.09585000	2.90594543		63.00000000	0.54507937	4.95796014	1.327215
64	0.32930258	9.09859180	2.99618975		64.00000000	0.53656250	4.88196316	1.348598
65	0.33944705	9.09514050	3.08731861		65.00000000	0.52830769	4.80503269	1.370129
66	0.34925959	9.10855960	3.18125179		66.00000000	0.52030303	4.73921116	1.391514
67	0.35937580	9.09050080	3.26690600		67.00000000	0.51253731	4.65922086	1.412862
68	0.36956123	9.10334970	3.36424511		68.00000000	0.50500000	4.59719160	1.434239
69	0.37939236	9.09672550	3.45122816		69.00000000	0.49768116	4.52726889	1.455726
70	0.38952270	9.09775730	3.54378299		70.00000000	0.49057143	4.46309980	1.477105
71	0.39933822	9.10548690	3.63616893		71.00000000	0.48366197	4.40397775	1.498467
72	0.40949610	9.09610840	3.72482091		72.00000000	0.47694444	4.33833837	1.519846
73	0.41934660	9.08693790	3.81057651		73.00000000	0.47041096	4.27459517	1.541325
74	0.42947248	9.09988310	3.90814936		74.00000000	0.46405405	4.22283764	1.562716
75	0.43926194	9.09682080	3.99588715		75.00000000	0.45786667	4.16513102	1.584082
76	0.44942203	9.10275840	4.09098016		76.00000000	0.45184211	4.11300952	1.605454
77	0.45958140	9.07612710	4.17121920		77.00000000	0.44597403	4.04771694	1.626927
78	0.46943265	9.08715820	4.26580875		78.00000000	0.44025641	4.00067965	1.648289
79	0.47956151	9.07726190	4.35310542		79.00000000	0.43468354	3.94573638	1.669672
80	0.48941052	9.08440970	4.44600568		80.00000000	0.42925000	3.89948286	1.691017
81	0.49952820	9.06077380	4.52611203		81.00000000	0.42395062	3.84132065	1.712478
82	0.50935191	9.05645370	4.61292199		82.00000000	0.41878049	3.79266610	1.733871
83	0.51949489	9.01552200	4.68351761		83.00000000	0.41373494	3.73003645	1.755261
84	0.52926648	9.01131440	4.76938665		84.00000000	0.40880952	3.68391115	1.776745
85	0.53942066	8.94955060	4.82757249		85.00000000	0.40400000	3.61561844	1.798135
86	0.54958373	8.90603730	4.89461320		86.00000000	0.39930233	3.55620141	1.819487
87	0.55937767	8.79779620	4.92129074		87.00000000	0.39471264	3.47260140	1.840856
88	0.56949759	8.68866440	4.94817344		88.00000000	0.39022727	3.39055381	1.862332
89	0.57932281	8.51663880	4.93388312		89.00000000	0.38584270	3.28608288	1.883713
90	0.58947992	8.26069550	4.86951412		90.00000000	0.38155556	3.15191426	1.905064
91	0.59925449	7.95523260	4.76720885		91.00000000	0.37736264	3.00200755	1.926441
92	0.60937369	7.49168590	4.56523628		92.00000000	0.37326087	2.79635319	1.947922
93	0.61916536	6.90633010	4.27616036		93.00000000	0.36924731	2.55014382	1.969328
94	0.62929648	6.10024550	3.83886302		94.00000000	0.36531915	2.22853649	1.990804
95	0.63941413	5.07037640	3.24207031		95.00000000	0.36147368	1.83280764	2.012246
96	0.64916790	3.79748080	2.46520264		96.00000000	0.35770833	1.35839053	2.033739
97	0.65928632	2.17559100	1.43433738		97.00000000	0.35402062	0.77020407	2.055120
98	0.66900432	0.26006845	0.17398692		98.00000000	0.35040816	0.09113011	2.076461
99	0.67912281	-2.08234190	-1.41416588		99.00000000	0.34686869	-0.72229920	2.097854
100	0.68881547	-4.76233340	-3.28036892		100.00000000	0.34340000	-1.63538529	2.119334
101	0.69903368	-7.98824020	-5.58404894		101.00000000	0.34000000	-2.71600167	2.140716
01:39 03/04/2018
Test Lot:	JK-PERC
Recipe:	Recipe_YJX-LID
Cell Name:	1-20-2-1.5h
Test Order:	4
Test Condition:	Light
1	-0.29978809	9.08679390	-2.72411259		1.00000000	34.34000000	312.04050253	0.000000
2	-0.29001224	9.10917470	-2.64177216		2.00000000	17.17000000	156.40452960	0.061787
3	-0.27985460	9.09669210	-2.54575113		3.00000000	11.44666667	104.12680224	0.083256
4	-0.27002591	9.10560510	-2.45874930		4.00000000	8.58500000	78.17161978	0.104766
5	-0.25984368	9.10153960	-2.36497754		5.00000000	6.86800000	62.50937397	0.126146
6	-0.24970461	9.11249920	-2.27543306		6.00000000	5.72333333	52.15387042	0.147519
7	-0.23987147	9.08445930	-2.17910261		7.00000000	4.90571429	44.56576177	0.168885
8	-0.22974730	9.10727880	-2.09237271		8.00000000	4.29250000	39.09299425	0.190363
9	-0.21996401	9.10251140	-2.00222491		9.00000000	3.81555556	34.73113794	0.211734
10	-0.20980039	9.10150340	-1.90949896		10.00000000	3.43400000	31.25456268	0.233118
11	-0.19997543	9.10927490	-1.82163117		11.00000000	3.12181818	28.43750001	0.254478
12	-0.18985423	9.10031320	-1.72773296		12.00000000	2.86166667	26.04206294	0.275945
13	-0.18006797	9.10210700	-1.63899793		13.00000000	2.64153846	24.04356572	0.297335
14	-0.16990137	9.10351750	-1.54670010		14.00000000	2.45285714	22.32962793	0.318718
15	-0.16011289	9.10443210	-1.45773694		15.00000000	2.28933333	20.84307989	0.340206
16	-0.14993736	9.09793660	-1.36412060		16.00000000	2.14625000	19.52644643	0.361574
17	-0.13979606	9.10547160	-1.27290905		17.00000000	2.02000000	18.39305263	0.382925
18	-0.12993984	9.10002800	-1.18245618		18.00000000	1.90777778	17.36083120	0.404289
19	-0.11982237	9.10454560	-1.09092823		19.00000000	1.80736842	16.45526821	0.425764
20	-0.11000113	9.10436340	-1.00149026		20.00000000	1.71700000	15.63219196	0.447142
21	-0.09981965	9.09508510	-0.90786817		21.00000000	1.63523810	14.87262963	0.468487
22	-0.09000511	9.11442470	-0.82034477		22.00000000	1.56090909	14.22678837	0.489858
23	-0.07988242	9.09337900	-0.72640113		23.00000000	1.49304348	13.57681021	0.511344
24	-0.07003588	9.10748100	-0.63785040		24.00000000	1.43083333	13.03128740	0.532729
25	-0.05989309	9.09948060	-0.54499605		25.00000000	1.37360000	12.49904655	0.554088
26	-0.04971012	9.09984400	-0.45235431		26.00000000	1.32076923	12.01879396	0.575454
27	-0.03993056	9.10302160	-0.36348878		27.00000000	1.27185185	11.57769488	0.596940
28	-0.02978406	9.09977720	-0.27102828		28.00000000	1.22642857	11.16022675	0.618330
29	-0.01991370	9.10379410	-0.18129019		29.00000000	1.18413793	10.78014791	0.639687
30	-0.00977910	9.10039330	-0.08899366		30.00000000	1.14466667	10.41691686	0.661062
31	-0.00060914	9.09789850	-0.00554188		31.00000000	1.10774194	10.07812369	0.682668
32	0.00952078	9.10887240	0.08672358		32.00000000	1.07312500	9.77495869	0.704052
33	0.01933653	9.10183530	0.17599790		33.00000000	1.04060606	9.47142498	0.725399
34	0.02948944	9.10604100	0.26853208		34.00000000	1.01000000	9.19710141	0.746779
35	0.03931933	9.08429430	0.35718839		35.00000000	0.98114286	8.91299046	0.768263
36	0.04946034	9.11066340	0.45061648		36.00000000	0.95388889	8.69056059	0.789643
37	0.05929469	9.09568600	0.53932591		37.00000000	0.92810811	8.44177993	0.811011
38	0.06944463	9.10483930	0.63228217		38.00000000	0.90368421	8.22789951	0.832429
39	0.07959308	9.09421060	0.72383620		39.00000000	0.88051282	8.00756903	0.853902
40	0.08938798	9.09523680	0.81300487		40.00000000	0.85850000	7.80826079	0.875280
41	0.09954387	9.10416980	0.90626429		41.00000000	0.83756098	7.62529734	0.896659
42	0.10936781	9.10268970	0.99554124		42.00000000	0.81761905	7.44253248	0.918011
43	0.11950062	9.10003090	1.08745933		43.00000000	0.79860465	7.26732700	0.939501
44	0.12930892	9.10420800	1.17725530		44.00000000	0.78045455	7.10542052	0.960872
45	0.13947897	9.09130670	1.26804609		45.00000000	0.76311111	6.93767716	0.982262
46	0.14927834	9.10456560	1.35911444		46.00000000	0.74652174	6.79675615	1.003727
47	0.15941711	9.10336690	1.45123244		47.00000000	0.73063830	6.65126850	1.025102
48	0.16956779	9.10315990	1.54360271		48.00000000	0.71541667	6.51255231	1.046465
49	0.17939842	9.10479740	1.63338627		49.00000000	0.70081633	6.38079067	1.067836
50	0.18954016	9.10161690	1.72512192		50.00000000	0.68680000	6.25099049	1.089319
51	0.19934773	9.09127140	1.81232432		51.00000000	0.67333333	6.12145608	1.110685
52	0.20949915	9.10591700	1.90768187		52.00000000	0.66038462	6.01340750	1.132039
53	0.21929331	9.09208970	1.99383445		53.00000000	0.64792453	5.89098793	1.153420
54	0.22943582	9.11193180	2.09060354		54.00000000	0.63592593	5.79451367	1.174902
55	0.23926868	9.09356310	2.17580484		55.00000000	0.62436364	5.67769012	1.196289
56	0.24942234	9.11042790	2.27234425		56.00000000	0.61321429	5.58664454	1.217648
57	0.25954995	9.09904000	2.36165538		57.00000000	0.60245614	5.48177252	1.239024
58	0.26937684	9.11136720	2.45439130		58.00000000	0.59206897	5.39455775	1.260509
59	0.27952978	9.10876560	2.54617124		59.00000000	0.58203390	5.30161035	1.281901
60	0.28935295	9.08852960	2.62979285		60.00000000	0.57233333	5.20166844	1.303263
61	0.29952970	9.09523010	2.72429154		61.00000000	0.56295082	5.12016724	1.324639
62	0.30935362	9.10521790	2.81673212		62.00000000	0.55387097	5.04311585	1.346135
63	0.31946859	9.10190390	2.90777241		63.00000000	0.54507937	4.96126000	1.367512
64	0.32932749	9.10208420	2.99756654		64.00000000	0.53656250	4.88383705	1.388870
65	0.33946627	9.10023500	3.08922283		65.00000000	0.52830769	4.80772415	1.410253
66	0.34927383	9.10161300	3.17895523		66.00000000	0.52030303	4.73559682	1.431727
67	0.35943270	9.09331230	3.26843379		67.00000000	0.51253731	4.66066186	1.453116
68	0.36954394	9.09864810	3.36235027		68.00000000	0.50500000	4.59481729	1.474465
69	0.37939391	9.10510920	3.45442298		69.00000000	0.49768116	4.53144130	1.495817
70	0.38955650	9.10467050	3.54678357		70.00000000	0.49057143	4.46649121	1.517285
71	0.39939979	9.07826810	3.62585837		71.00000000	0.48366197	4.39081305	1.538656
72	0.40952590	9.11875060	3.73436455		72.00000000	0.47694444	4.34913744	1.560041
73	0.41934985	9.09581280	3.81432773		73.00000000	0.47041096	4.27877002	1.581399
74	0.42948788	9.08871360	3.90349234		74.00000000	0.46405405	4.21765439	1.602881
75	0.43931106	9.09734250	3.99656318		75.00000000	0.45786667	4.16536989	1.624266
76	0.44948632	9.10450170	4.09234896		76.00000000	0.45184211	4.11379722	1.645656
77	0.45958489	9.08603950	4.17580646		77.00000000	0.44597403	4.05213762	1.667126
78	0.46946836	9.09993080	4.27212959		78.00000000	0.44025641	4.00630287	1.688507
79	0.47958109	9.07506080	4.35222755		79.00000000	0.43468354	3.94477959	1.709863
80	0.48939461	9.09085270	4.44901431		80.00000000	0.42925000	3.90224852	1.731238
81	0.49953634	9.06220440	4.52690042		81.00000000	0.42395062	3.84192715	1.752717
82	0.50936699	9.05435090	4.61198746		82.00000000	0.41878049	3.79178549	1.774091
83	0.51953703	9.04101850	4.69714390		83.00000000	0.41373494	3.74058524	1.795438
84	0.52930140	8.99484250	4.76098273		84.00000000	0.40880952	3.67717728	1.816814
85	0.53942454	8.94955920	4.82761185		85.00000000	0.40400000	3.61562192	1.838298
86	0.54955739	8.88229470	4.88133069		86.00000000	0.39930233	3.54672093	1.859680
87	0.55940735	8.80578610	4.92602147		87.00000000	0.39471264	3.47575511	1.881039
88	0.56954759	8.67407700	4.94029965		88.00000000	0.39022727	3.38486141	1.902416
89	0.57934922	8.51290130	4.93194273		89.00000000	0.38584270	3.28464079	1.923905
90	0.58946788	8.26639750	4.87277581		90.00000000	0.38155556	3.15408989	1.945294
91	0.59926277	7.93205210	4.75338351		91.00000000	0.37736264	2.99326010	1.966636
92	0.60940379	7.49028730	4.56460947		92.00000000	0.37326087	2.79583115	1.988107
93	0.61922103	6.89279220	4.26816189		93.00000000	0.36924731	2.54514499	2.009612
94	0.62930101	6.08813190	3.83126755		94.00000000	0.36531915	2.22411116	2.030999
95	0.63942790	5.07273050	3.24364541		95.00000000	0.36147368	1.83365858	2.052368
96	0.64924139	3.78207470	2.45547944		96.00000000	0.35770833	1.35287964	2.073743
97	0.65932804	2.16759350	1.42915517		97.00000000	0.35402062	0.76737279	2.095260
98	0.66905224	0.25948659	0.17361008		98.00000000	0.35040816	0.09092622	2.116652
99	0.67915231	-2.08981800	-1.41930472		99.00000000	0.34686869	-0.72489243	2.138022
100	0.68887800	-4.74489450	-3.26865343		100.00000000	0.34340000	-1.62939677	2.159384
101	0.69905847	-7.95120190	-5.55835503		101.00000000	0.34000000	-2.70340865	2.180872
