# Supplementary material for: Study on the Electrical Injection Regeneration of Industrialized B-Doped Czochralski Silicon PERC Solar Cells
Source: Hindawi journal article supplement (doi:10.1155/2019/5357370), 2019-06-20
Supplement: f1 [file 5357370.f1.zip › section3.1/IVRawData_1-20-2-1h.csv]

01:06 03/04/2018
Test Lot:	JK-PERC
Recipe:	Recipe_YJX-LID
Cell Name:	1-20-2-1h
Test Order:	2
Test Condition:	Light
1	-0.29980209	9.08695790	-2.72428897		1.00000000	34.34000000	312.04613429	0.000000
2	-0.29002631	9.08656220	-2.63534211		2.00000000	17.17000000	156.01627297	0.061781
3	-0.27988881	9.10003660	-2.54699841		3.00000000	11.44666667	104.16508561	0.083253
4	-0.27004007	9.08185480	-2.45246471		4.00000000	8.58500000	77.96772346	0.104750
5	-0.25989586	9.09166240	-2.36288542		5.00000000	6.86800000	62.44153736	0.126118
6	-0.24972261	9.07837200	-2.26707475		6.00000000	5.72333333	51.95854908	0.147482
7	-0.23985900	9.09044360	-2.18042471		7.00000000	4.90571429	44.59511903	0.168854
8	-0.22977136	9.08781910	-2.08812055		8.00000000	4.29250000	39.00946349	0.190324
9	-0.21996357	9.08812240	-1.99905585		9.00000000	3.81555556	34.67623591	0.211707
10	-0.20982009	9.09221460	-1.90772929		10.00000000	3.43400000	31.22266494	0.233117
11	-0.20002124	9.09105970	-1.81840503		11.00000000	3.12181818	28.38063546	0.254510
12	-0.18981078	9.08231160	-1.72392065		12.00000000	2.86166667	25.99054836	0.275994
13	-0.18003425	9.09770970	-1.63789934		13.00000000	2.64153846	24.03195008	0.297365
14	-0.16989897	9.08436110	-1.54342359		14.00000000	2.45285714	22.28264001	0.318705
15	-0.16003312	9.09896850	-1.45613632		15.00000000	2.28933333	20.83057189	0.340078
16	-0.14994101	9.07550620	-1.36079057		16.00000000	2.14625000	19.47830518	0.361567
17	-0.13979381	9.10388280	-1.27266646		17.00000000	2.02000000	18.38984326	0.382947
18	-0.12997189	9.09455590	-1.18203662		18.00000000	1.90777778	17.35039164	0.404317
19	-0.11981055	9.08440780	-1.08840789		19.00000000	1.80736842	16.41887178	0.425677
20	-0.11002956	9.09683900	-1.00092119		20.00000000	1.71700000	15.61927256	0.447149
21	-0.09991586	9.07991220	-0.90722725		21.00000000	1.63523810	14.84781833	0.468513
22	-0.09005225	9.10384940	-0.81982209		22.00000000	1.56090909	14.21028129	0.489896
23	-0.07990282	9.07955170	-0.72548179		23.00000000	1.49304348	13.55616545	0.511247
24	-0.07009950	9.08906360	-0.63713884		24.00000000	1.43083333	13.00493517	0.532724
25	-0.05992551	9.09730240	-0.54516050		25.00000000	1.37360000	12.49605458	0.554089
26	-0.04976567	9.08222870	-0.45198315		26.00000000	1.32076923	11.99552821	0.575478
27	-0.03996681	9.09049420	-0.36331803		27.00000000	1.27185185	11.56176188	0.596959
28	-0.02984566	9.07991890	-0.27099621		28.00000000	1.22642857	11.13587197	0.618338
29	-0.01994335	9.10109620	-0.18150634		29.00000000	1.18413793	10.77695322	0.639704
30	-0.00982444	9.07830810	-0.08918929		30.00000000	1.14466667	10.39163667	0.661072
31	-0.00062773	9.09253310	-0.00570767		31.00000000	1.10774194	10.07218021	0.682669
32	0.00946790	9.08661750	0.08603117		32.00000000	1.07312500	9.75107640	0.704050
33	0.01930443	9.08911900	0.17546030		33.00000000	1.04060606	9.45819232	0.725395
34	0.02944985	9.08139710	0.26744578		34.00000000	1.01000000	9.17221107	0.746770
35	0.03927448	9.08777050	0.35691742		35.00000000	0.98114286	8.91640111	0.768256
36	0.04943552	9.10178850	0.44995167		36.00000000	0.95388889	8.68209492	0.789641
37	0.05926387	9.08540250	0.53843611		37.00000000	0.92810811	8.43223573	0.811012
38	0.06940631	9.09010030	0.63091030		38.00000000	0.90368421	8.21458011	0.832386
39	0.07955843	9.08351330	0.72267001		39.00000000	0.88051282	7.99814992	0.853864
40	0.08938082	9.08872510	0.81235767		40.00000000	0.85850000	7.80267050	0.875251
41	0.09951135	9.09516140	0.90507177		41.00000000	0.83756098	7.61775226	0.896613
42	0.10933746	9.09377480	0.99429024		42.00000000	0.81761905	7.43524349	0.917983
43	0.11947320	9.07952980	1.08476048		43.00000000	0.79860465	7.25095473	0.939461
44	0.12934248	9.08203130	1.17469245		44.00000000	0.78045455	7.08811261	0.960832
45	0.13946855	9.10384460	1.26970001		45.00000000	0.76311111	6.94724497	0.982179
46	0.14928946	9.08501340	1.35629674		46.00000000	0.74652174	6.78216000	1.003561
47	0.15942147	9.09236620	1.44951839		47.00000000	0.73063830	6.64323096	1.025023
48	0.16959071	9.09083940	1.54172191		48.00000000	0.71541667	6.50373802	1.046402
49	0.17940566	9.07986740	1.62897960		49.00000000	0.70081633	6.36331932	1.067761
50	0.18950865	9.09324070	1.72324777		50.00000000	0.68680000	6.24523771	1.089123
51	0.19931243	9.08420560	1.81059509		51.00000000	0.67333333	6.11669844	1.110598
52	0.20946902	9.08763030	1.90357701		52.00000000	0.66038462	6.00133124	1.131972
53	0.21923485	9.08883670	1.99258975		53.00000000	0.64792453	5.88888023	1.153345
54	0.22941227	9.07087040	2.08096897		54.00000000	0.63592593	5.76840166	1.174708
55	0.23920192	9.09941580	2.17659773		55.00000000	0.62436364	5.68134434	1.196186
56	0.24939868	9.07018470	2.26209209		56.00000000	0.61321429	5.56196683	1.217560
57	0.25955898	9.09503460	2.36069790		57.00000000	0.60245614	5.47935944	1.238953
58	0.26935533	9.08137230	2.44611603		58.00000000	0.59206897	5.37679870	1.260439
59	0.27946204	9.08701610	2.53947606		59.00000000	0.58203390	5.28895140	1.281819
60	0.28934622	9.07789610	2.62665492		60.00000000	0.57233333	5.19558253	1.303182
61	0.29949015	9.08649060	2.72131443		61.00000000	0.56295082	5.11524733	1.324559
62	0.30932444	9.08499050	2.81020960		62.00000000	0.55387097	5.03191248	1.346036
63	0.31945571	9.08878520	2.90346433		63.00000000	0.54507937	4.95410927	1.367410
64	0.32930714	9.08510880	2.99179120		64.00000000	0.53656250	4.87472869	1.388757
65	0.33940566	9.09602450	3.08724220		65.00000000	0.52830769	4.80549971	1.410131
66	0.34919456	9.08448790	3.17225376		66.00000000	0.52030303	4.72668658	1.431610
67	0.35943526	9.08693120	3.26616348		67.00000000	0.51253731	4.65739130	1.452981
68	0.36954272	9.10125450	3.36330234		68.00000000	0.50500000	4.59613352	1.474346
69	0.37936288	9.07237720	3.44172314		69.00000000	0.49768116	4.51515120	1.495725
70	0.38949341	9.08814430	3.53977231		70.00000000	0.49057143	4.45838393	1.517195
71	0.39931580	9.08366200	3.62724976		71.00000000	0.48366197	4.39342187	1.538589
72	0.40950215	9.08030410	3.71840405		72.00000000	0.47694444	4.33080059	1.559938
73	0.41934091	9.09311770	3.81311625		73.00000000	0.47041096	4.27750222	1.581311
74	0.42943946	9.08239560	3.90033906		74.00000000	0.46405405	4.21472250	1.602801
75	0.43929309	9.08153250	3.98945447		75.00000000	0.45786667	4.15813101	1.624175
76	0.44940948	9.08170410	4.08140392		76.00000000	0.45184211	4.10349630	1.645586
77	0.45956382	9.05922030	4.16328989		77.00000000	0.44597403	4.04017695	1.666963
78	0.46944577	9.08951950	4.26703648		78.00000000	0.44025641	4.00171923	1.688431
79	0.47956440	9.06792830	4.34865559		79.00000000	0.43468354	3.94167921	1.709806
80	0.48937413	9.05890180	4.43319219		80.00000000	0.42925000	3.88853360	1.731167
81	0.49945778	9.06778620	4.52897636		81.00000000	0.42395062	3.84429356	1.752531
82	0.50934047	9.02648160	4.59755238		82.00000000	0.41878049	3.78011437	1.774013
83	0.51943898	9.02037910	4.68553652		83.00000000	0.41373494	3.73204600	1.795396
84	0.52928150	8.97446820	4.75001999		84.00000000	0.40880952	3.66884807	1.816773
85	0.53941721	8.94878480	4.82712853		85.00000000	0.40400000	3.61530906	1.838129
86	0.54954106	8.87333970	4.87626450		86.00000000	0.39930233	3.54314518	1.859606
87	0.55938131	8.79392430	4.91915689		87.00000000	0.39471264	3.47107311	1.880974
88	0.56945229	8.67343710	4.93910862		88.00000000	0.39022727	3.38461170	1.902364
89	0.57932603	8.49962520	4.92405412		89.00000000	0.38584270	3.27951831	1.923857
90	0.58943129	8.26333620	4.87066892		90.00000000	0.38155556	3.15292183	1.945232
91	0.59920377	7.93919370	4.75719480		91.00000000	0.37736264	2.99595507	1.966590
92	0.60934699	7.47702840	4.55610475		92.00000000	0.37326087	2.79088212	1.988070
93	0.61916119	6.88877680	4.26526324		93.00000000	0.36924731	2.54366232	2.009579
94	0.62925822	6.08707330	3.83034091		94.00000000	0.36531915	2.22372444	2.030962
95	0.63938874	5.07253690	3.24332298		95.00000000	0.36147368	1.83358860	2.052302
96	0.64916724	3.81446620	2.47622650		96.00000000	0.35770833	1.36446635	2.073690
97	0.65930372	2.21380780	1.45957172		97.00000000	0.35402062	0.78373361	2.095173
98	0.66897428	0.33876988	0.22662834		98.00000000	0.35040816	0.11870773	2.116552
99	0.67909515	-1.95796540	-1.32964481		99.00000000	0.34686869	-0.67915689	2.137912
100	0.68881702	-4.55036210	-3.13436686		100.00000000	0.34340000	-1.56259435	2.159286
101	0.69898927	-7.66634940	-5.35869597		101.00000000	0.34000000	-2.60655880	2.180767
01:07 03/04/2018
Test Lot:	JK-PERC
Recipe:	Recipe_YJX-LID
Cell Name:	1-20-2-1h
Test Order:	3
Test Condition:	Light
1	-0.29987505	9.08001900	-2.72287115		1.00000000	34.34000000	311.80785246	0.000000
2	-0.28995189	9.09373660	-2.63674611		2.00000000	17.17000000	156.13945742	0.021601
3	-0.27986351	9.08087830	-2.54140647		3.00000000	11.44666667	103.94578694	0.043016
4	-0.27011079	9.09620000	-2.45698177		4.00000000	8.58500000	78.09087700	0.064374
5	-0.25989810	9.07898240	-2.35961028		5.00000000	6.86800000	62.35445112	0.085747
6	-0.24978067	9.08841800	-2.27011114		6.00000000	5.72333333	52.01604569	0.107237
7	-0.23994610	9.08558940	-2.18005174		7.00000000	4.90571429	44.57130571	0.128605
8	-0.22979443	9.09197430	-2.08928505		8.00000000	4.29250000	39.02729968	0.149947
9	-0.21996729	9.08226490	-1.99780120		9.00000000	3.81555556	34.65388630	0.171320
10	-0.20983796	9.09170910	-1.90778569		10.00000000	3.43400000	31.22092905	0.192803
11	-0.20000710	9.08382030	-1.81682856		11.00000000	3.12181818	28.35803537	0.214175
12	-0.18988298	9.08596130	-1.72526941		12.00000000	2.86166667	26.00099259	0.235537
13	-0.18006402	9.08640380	-1.63613440		13.00000000	2.64153846	24.00208511	0.256910
14	-0.16989227	9.09935190	-1.54590955		14.00000000	2.45285714	22.31941030	0.278387
15	-0.16006438	9.07569500	-1.45269549		15.00000000	2.28933333	20.77729109	0.299783
16	-0.14994548	9.09512520	-1.36377291		16.00000000	2.14625000	19.52041246	0.321181
17	-0.13980201	9.07890610	-1.26924932		17.00000000	2.02000000	18.33939032	0.342554
18	-0.12995477	9.09602640	-1.18207202		18.00000000	1.90777778	17.35319703	0.364031
19	-0.11982320	9.07065200	-1.08687455		19.00000000	1.80736842	16.39400998	0.385407
20	-0.10997597	9.11289600	-1.00219958		20.00000000	1.71700000	15.64684243	0.406803
21	-0.09983548	9.07499410	-0.90600637		21.00000000	1.63523810	14.83977607	0.428148
22	-0.08998675	9.09356310	-0.81830018		22.00000000	1.56090909	14.19422531	0.449620
23	-0.07987752	9.07111260	-0.72457796		23.00000000	1.49304348	13.54356551	0.471000
24	-0.07003996	9.10006330	-0.63736805		24.00000000	1.43083333	13.02067391	0.492378
25	-0.05989574	9.07967850	-0.54383405		25.00000000	1.37360000	12.47184639	0.513851
26	-0.04975822	9.08234690	-0.45192143		26.00000000	1.32076923	11.99568433	0.535293
27	-0.03990801	9.09324460	-0.36289327		27.00000000	1.27185185	11.56525998	0.556665
28	-0.02978686	9.08578300	-0.27063698		28.00000000	1.22642857	11.14306387	0.578031
29	-0.01995451	9.07784080	-0.18114390		29.00000000	1.18413793	10.74941562	0.599382
30	-0.00988547	9.09018230	-0.08986075		30.00000000	1.14466667	10.40522867	0.620882
31	-0.00060689	9.08530040	-0.00551378		31.00000000	1.10774194	10.06416825	0.642391
32	0.00946418	9.07884880	0.08592383		32.00000000	1.07312500	9.74273962	0.663799
33	0.01928285	9.08889680	0.17525983		33.00000000	1.04060606	9.45796109	0.685159
34	0.02943496	9.08167270	0.26731871		34.00000000	1.01000000	9.17248943	0.706628
35	0.03929532	9.07646940	0.35666273		35.00000000	0.98114286	8.90531312	0.728005
36	0.04939235	9.07608410	0.44828916		36.00000000	0.95388889	8.65757578	0.749388
37	0.05926611	9.09193420	0.53884353		37.00000000	0.92810811	8.43829785	0.770766
38	0.06938621	9.08440590	0.63033253		38.00000000	0.90368421	8.20943417	0.792244
39	0.07948623	9.07674120	0.72147593		39.00000000	0.88051282	7.99218700	0.813628
40	0.08936667	9.10042380	0.81327461		40.00000000	0.85850000	7.81271383	0.835014
41	0.09955228	9.08035090	0.90396964		41.00000000	0.83756098	7.60534756	0.856499
42	0.10932928	9.08209320	0.99293871		42.00000000	0.81761905	7.42569239	0.877870
43	0.11949255	9.09953590	1.08732675		43.00000000	0.79860465	7.26693169	0.899230
44	0.12933058	9.08245850	1.17463963		44.00000000	0.78045455	7.08844602	0.920612
45	0.13940677	9.08899020	1.26706677		45.00000000	0.76311111	6.93590941	0.942087
46	0.14929987	9.08111860	1.35580983		46.00000000	0.74652174	6.77925245	0.963462
47	0.15940510	9.09255500	1.44939964		47.00000000	0.73063830	6.64336891	0.984798
48	0.16961007	9.08782390	1.54138645		48.00000000	0.71541667	6.50158068	1.006181
49	0.17940342	9.08246710	1.62942566		49.00000000	0.70081633	6.36514123	1.027666
50	0.18955629	9.08806610	1.72270009		50.00000000	0.68680000	6.24168380	1.049038
51	0.19934146	9.08857820	1.81173045		51.00000000	0.67333333	6.11964265	1.070390
52	0.20948838	9.08319950	1.90282475		52.00000000	0.66038462	5.99840521	1.091759
53	0.21932863	9.08522220	1.99264934		53.00000000	0.64792453	5.88653831	1.113234
54	0.22942194	9.06983090	2.08081820		54.00000000	0.63592593	5.76774061	1.134620
55	0.23924954	9.08874510	2.17447808		55.00000000	0.62436364	5.67468194	1.155969
56	0.24943516	9.07571030	2.26380125		56.00000000	0.61321429	5.56535521	1.177335
57	0.25955081	9.08427430	2.35783075		57.00000000	0.60245614	5.47287683	1.198818
58	0.26932779	9.07691960	2.44466670		58.00000000	0.59206897	5.37416240	1.220188
59	0.27950597	9.08665750	2.53977502		59.00000000	0.58203390	5.28874269	1.241537
60	0.28935143	9.07743740	2.62656949		60.00000000	0.57233333	5.19532001	1.262924
61	0.29951322	9.08011530	2.71961457		61.00000000	0.56295082	5.11165835	1.284396
62	0.30932593	9.09523680	2.81339258		62.00000000	0.55387097	5.03758761	1.305794
63	0.31947136	9.07748700	2.89999712		63.00000000	0.54507937	4.94795085	1.327156
64	0.32926917	9.08735180	2.99218478		64.00000000	0.53656250	4.87593220	1.348511
65	0.33944660	9.06939890	3.07857662		65.00000000	0.52830769	4.79143320	1.369986
66	0.34922433	9.09775160	3.17715621		66.00000000	0.52030303	4.73358773	1.391351
67	0.35934222	9.06325530	3.25681028		67.00000000	0.51253731	4.64525652	1.412732
68	0.36954123	9.09074120	3.35940368		68.00000000	0.50500000	4.59082431	1.434100
69	0.37935469	9.09266000	3.44934322		69.00000000	0.49768116	4.52524557	1.455572
70	0.38949788	9.07941340	3.53641227		70.00000000	0.49057143	4.45410080	1.476941
71	0.39932099	9.08455940	3.62765525		71.00000000	0.48366197	4.39385591	1.498333
72	0.40950438	9.07875540	3.71779010		72.00000000	0.47694444	4.33006195	1.519819
73	0.41928211	9.08926580	3.81096654		73.00000000	0.47041096	4.27569024	1.541196
74	0.42940074	9.07936000	3.89868390		74.00000000	0.46405405	4.21331382	1.562615
75	0.43931246	9.08175090	3.98972633		75.00000000	0.45786667	4.15823101	1.584003
76	0.44940650	9.07785130	4.07964538		76.00000000	0.45184211	4.10175544	1.605488
77	0.45957127	9.06520840	4.16610934		77.00000000	0.44597403	4.04284749	1.626876
78	0.46945843	9.08288570	4.26403726		78.00000000	0.44025641	3.99879865	1.648206
79	0.47959194	9.07578370	4.35267271		79.00000000	0.43468354	3.94509383	1.669575
80	0.48940837	9.05387210	4.43104079		80.00000000	0.42925000	3.88637460	1.691066
81	0.49951434	9.05503850	4.52312158		81.00000000	0.42395062	3.83888916	1.712437
82	0.50931513	9.03410150	4.60120458		82.00000000	0.41878049	3.78330543	1.733801
83	0.51950151	9.02169700	4.68678521		83.00000000	0.41373494	3.73259126	1.755178
84	0.52927107	8.99483110	4.76070388		84.00000000	0.40880952	3.67717262	1.776654
85	0.53940755	8.93313120	4.81859841		85.00000000	0.40400000	3.60898500	1.798051
86	0.54952914	8.88656330	4.88342549		86.00000000	0.39930233	3.54842539	1.819403
87	0.55935448	8.79476640	4.91939199		87.00000000	0.39471264	3.47140550	1.840781
88	0.56945598	8.66836070	4.93624984		88.00000000	0.39022727	3.38263075	1.862259
89	0.57930815	8.50917430	4.92943402		89.00000000	0.38584270	3.28320276	1.883637
90	0.58942384	8.25763700	4.86724811		90.00000000	0.38155556	3.15074727	1.904996
91	0.59927303	7.94820880	4.76314717		91.00000000	0.37736264	2.99935704	1.926370
92	0.60938346	7.48500440	4.56123788		92.00000000	0.37326087	2.79385925	1.947841
93	0.61920804	6.90442610	4.27527615		93.00000000	0.36924731	2.54944078	1.969224
94	0.62922990	6.10537530	3.84168469		94.00000000	0.36531915	2.23041051	1.990690
95	0.63944083	5.08901210	3.25412212		95.00000000	0.36147368	1.83954395	2.012122
96	0.64918059	3.82910060	2.48577779		96.00000000	0.35770833	1.36970119	2.033612
97	0.65927470	2.21555710	1.46066074		97.00000000	0.35402062	0.78435289	2.055000
98	0.66897798	0.32770941	0.21923038		98.00000000	0.35040816	0.11483205	2.076387
99	0.67913604	-2.00863500	-1.36413642		99.00000000	0.34686869	-0.69673258	2.097743
100	0.68879324	-4.64238600	-3.19764409		100.00000000	0.34340000	-1.59419535	2.119224
101	0.69906515	-7.83945660	-5.48029090		101.00000000	0.34000000	-2.66541524	2.140600
01:07 03/04/2018
Test Lot:	JK-PERC
Recipe:	Recipe_YJX-LID
Cell Name:	1-20-2-1h
Test Order:	4
Test Condition:	Light
1	-0.29985550	9.07953930	-2.72254980		1.00000000	34.34000000	311.79137956	0.000000
2	-0.29001415	9.08589550	-2.63503826		2.00000000	17.17000000	156.00482574	0.061778
3	-0.27988252	9.08918000	-2.54390260		3.00000000	11.44666667	104.04081373	0.083240
4	-0.27003297	9.09155270	-2.45501898		4.00000000	8.58500000	78.05097993	0.104754
5	-0.25988498	9.08845230	-2.36195224		5.00000000	6.86800000	62.41949040	0.126133
6	-0.24969158	9.08318710	-2.26799534		6.00000000	5.72333333	51.98610750	0.147476
7	-0.23990679	9.08983230	-2.18071249		7.00000000	4.90571429	44.59212017	0.168858
8	-0.22980121	9.08514790	-2.08777798		8.00000000	4.29250000	38.99799736	0.190337
9	-0.21996433	9.09273430	-2.00007721		9.00000000	3.81555556	34.69383287	0.211706
10	-0.20982450	9.08591750	-1.90644810		10.00000000	3.43400000	31.20104070	0.233066
11	-0.20004271	9.08706380	-1.81780087		11.00000000	3.12181818	28.36816099	0.254440
12	-0.18982026	9.09288500	-1.72601379		12.00000000	2.86166667	26.02080591	0.275917
13	-0.18011662	9.07919030	-1.63531307		13.00000000	2.64153846	23.98303038	0.297291
14	-0.16991651	9.09041980	-1.54461241		14.00000000	2.45285714	22.29750114	0.318626
15	-0.16009824	9.07651230	-1.45313364		15.00000000	2.28933333	20.77916216	0.340006
16	-0.14996958	9.08942890	-1.36313783		16.00000000	2.14625000	19.50818678	0.361490
17	-0.13979553	9.08162210	-1.26957017		17.00000000	2.02000000	18.34487664	0.382871
18	-0.12997353	9.09024620	-1.18149139		18.00000000	1.90777778	17.34216969	0.404229
19	-0.11981510	9.07979970	-1.08789711		19.00000000	1.80736842	16.41054325	0.425610
20	-0.11003850	9.07567410	-0.99867356		20.00000000	1.71700000	15.58293243	0.447087
21	-0.09984435	9.08729930	-0.90731550		21.00000000	1.63523810	14.85989800	0.468482
22	-0.09003650	9.07671930	-0.81723601		22.00000000	1.56090909	14.16793367	0.489827
23	-0.07986244	9.08448220	-0.72550890		23.00000000	1.49304348	13.56352690	0.511201
24	-0.07006203	9.07890030	-0.63608615		24.00000000	1.43083333	12.99039318	0.532686
25	-0.05991625	9.09014610	-0.54464750		25.00000000	1.37360000	12.48622468	0.554059
26	-0.04977048	9.08294390	-0.45206250		26.00000000	1.32076923	11.99647283	0.575451
27	-0.03993881	9.08272650	-0.36275326		27.00000000	1.27185185	11.55188252	0.596822
28	-0.02977443	9.08654020	-0.27054653		28.00000000	1.22642857	11.14399252	0.618292
29	-0.01996360	9.07921700	-0.18125382		29.00000000	1.18413793	10.75104523	0.639727
30	-0.00979400	9.08826350	-0.08901049		30.00000000	1.14466667	10.40303229	0.661123
31	-0.00060096	9.08444880	-0.00545935		31.00000000	1.10774194	10.06322490	0.682614
32	0.00951484	9.07790370	0.08637478		32.00000000	1.07312500	9.74172541	0.704093
33	0.01930678	9.10195450	0.17572946		33.00000000	1.04060606	9.47154902	0.725467
34	0.02949023	9.08112810	0.26780451		34.00000000	1.01000000	9.17193938	0.746846
35	0.03929185	9.08346460	0.35690610		35.00000000	0.98114286	8.91217641	0.768337
36	0.04943658	9.07721610	0.44874656		36.00000000	0.95388889	8.65865558	0.789717
37	0.05925905	9.08177380	0.53817725		37.00000000	0.92810811	8.42886790	0.811063
38	0.06940751	9.07765010	0.63005707		38.00000000	0.90368421	8.20332906	0.832449
39	0.07955374	9.08910470	0.72307225		39.00000000	0.88051282	8.00307322	0.853923
40	0.08937843	9.08078770	0.81162656		40.00000000	0.85850000	7.79585624	0.875304
41	0.09948967	9.07847980	0.90321500		41.00000000	0.83756098	7.60378040	0.896660
42	0.10933223	9.08375450	0.99314714		42.00000000	0.81761905	7.42705070	0.918032
43	0.11947251	9.08679010	1.08562162		43.00000000	0.79860465	7.25675284	0.939494
44	0.12928306	9.08791160	1.17491302		44.00000000	0.78045455	7.09270192	0.960862
45	0.13940473	9.08684540	1.26674923		45.00000000	0.76311111	6.93427269	0.982203
46	0.14927408	9.07494160	1.35465356		46.00000000	0.74652174	6.77464119	1.003581
47	0.15944561	9.08032890	1.44781858		47.00000000	0.73063830	6.63443605	1.025058
48	0.16959928	9.08944030	1.54156253		48.00000000	0.71541667	6.50273708	1.046417
49	0.17934807	9.08835700	1.62997929		49.00000000	0.70081633	6.36926897	1.067769
50	0.18955086	9.08364770	1.72181323		50.00000000	0.68680000	6.23864924	1.089154
51	0.19926092	9.08421040	1.81012812		51.00000000	0.67333333	6.11670167	1.110637
52	0.20943618	9.07413580	1.90045234		52.00000000	0.66038462	5.99241968	1.132029
53	0.21931000	9.08356090	1.99211574		53.00000000	0.64792453	5.88546191	1.153379
54	0.22945549	9.08240990	2.08400881		54.00000000	0.63592593	5.77573993	1.174761
55	0.23923030	9.08318710	2.17297357		55.00000000	0.62436364	5.67121173	1.196259
56	0.24939440	9.08220960	2.26505221		56.00000000	0.61321429	5.56934067	1.217625
57	0.25960612	9.08249470	2.35787121		57.00000000	0.60245614	5.47180470	1.238984
58	0.26937798	9.07677940	2.44508450		58.00000000	0.59206897	5.37407939	1.260353
59	0.27951974	9.08510970	2.53946750		59.00000000	0.58203390	5.28784182	1.281832
60	0.28935114	9.07520010	2.62591949		60.00000000	0.57233333	5.19403952	1.303231
61	0.29953086	9.09337040	2.72374506		61.00000000	0.56295082	5.11912032	1.324617
62	0.30936819	9.07343670	2.80703269		62.00000000	0.55387097	5.02551317	1.345985
63	0.31948838	9.08115290	2.90132283		63.00000000	0.54507937	4.94994906	1.367475
64	0.32927808	9.08876420	2.99273083		64.00000000	0.53656250	4.87669004	1.388851
65	0.33946154	9.08186240	3.08294300		65.00000000	0.52830769	4.79801777	1.410237
66	0.34922147	9.07153420	3.16797451		66.00000000	0.52030303	4.71994673	1.431725
67	0.35940269	9.08731940	3.26600704		67.00000000	0.51253731	4.65759027	1.453099
68	0.36957869	9.06809140	3.35137334		68.00000000	0.50500000	4.57938616	1.474455
69	0.37942198	9.08556560	3.44726329		69.00000000	0.49768116	4.52171482	1.495834
70	0.38953844	9.07763390	3.53608735		70.00000000	0.49057143	4.45322783	1.517309
71	0.39934155	9.08833410	3.62934943		71.00000000	0.48366197	4.39568159	1.538695
72	0.40948182	9.06839180	3.71334158		72.00000000	0.47694444	4.32511909	1.560038
73	0.41926855	9.07721810	3.80579207		73.00000000	0.47041096	4.27002287	1.581422
74	0.42948028	9.07908060	3.89928608		74.00000000	0.46405405	4.21318416	1.602897
75	0.43929011	9.08306410	3.99010023		75.00000000	0.45786667	4.15883228	1.624277
76	0.44945344	9.06896400	4.07607707		76.00000000	0.45184211	4.09773979	1.645614
77	0.45954683	9.08521460	4.17508157		77.00000000	0.44597403	4.05176973	1.666989
78	0.46948391	9.05732440	4.25226807		78.00000000	0.44025641	3.98754513	1.688464
79	0.47956464	9.06641770	4.34793334		79.00000000	0.43468354	3.94102258	1.709823
80	0.48936328	9.04710770	4.42732230		80.00000000	0.42925000	3.88347098	1.731183
81	0.49951026	9.05942820	4.52527734		81.00000000	0.42395062	3.84075018	1.752562
82	0.50929254	9.03427980	4.60109131		82.00000000	0.41878049	3.78338010	1.774041
83	0.51948637	9.01603790	4.68370880		83.00000000	0.41373494	3.73024990	1.795420
84	0.52928579	8.98806380	4.75725445		84.00000000	0.40880952	3.67440608	1.816768
85	0.53939998	8.93038270	4.81704825		85.00000000	0.40400000	3.60787461	1.838196
86	0.54954028	8.87425610	4.87676118		86.00000000	0.39930233	3.54351110	1.859668
87	0.55933893	8.79896260	4.92160233		87.00000000	0.39471264	3.47306179	1.881056
88	0.56952012	8.66388800	4.93425853		88.00000000	0.39022727	3.38088539	1.902424
89	0.57933366	8.50156590	4.92524329		89.00000000	0.38584270	3.28026711	1.923784
90	0.58945829	8.26410010	4.87134231		90.00000000	0.38155556	3.15321330	1.945262
91	0.59930533	7.94135330	4.75929536		91.00000000	0.37736264	2.99677003	1.966637
92	0.60930938	7.48717310	4.56200480		92.00000000	0.37326087	2.79466874	1.988119
93	0.61916387	6.91729120	4.28293679		93.00000000	0.36924731	2.55419118	2.009500
94	0.62929368	6.10731840	3.84329687		94.00000000	0.36531915	2.23112036	2.030990
95	0.63939530	5.09650180	3.25867930		95.00000000	0.36147368	1.84225128	2.052365
96	0.64915746	3.83226610	2.48774413		96.00000000	0.35770833	1.37083352	2.073748
97	0.65928137	2.21203950	1.45835643		97.00000000	0.35402062	0.78310759	2.095281
98	0.66902494	0.32644269	0.21839830		98.00000000	0.35040816	0.11438818	2.116666
99	0.67912573	-2.02590820	-1.37584639		99.00000000	0.34686869	-0.70272412	2.138039
100	0.68883878	-4.68409250	-3.22658456		100.00000000	0.34340000	-1.60851736	2.159415
101	0.69899249	-7.89739990	-5.52022322		101.00000000	0.34000000	-2.68511597	2.180890
