# Supplementary material for: Study on the Electrical Injection Regeneration of Industrialized B-Doped Czochralski Silicon PERC Solar Cells
Source: Hindawi journal article supplement (doi:10.1155/2019/5357370), 2019-06-20
Supplement: f1 [file 5357370.f1.zip › section3.1/IVRawData_1-20-2-2h.csv]

02:11 03/04/2018
Test Lot:	JK-PERC
Recipe:	Recipe_YJX-LID
Cell Name:	1-20-2-2h
Test Order:	2
Test Condition:	Light
1	-0.29980606	9.07912540	-2.72197681		1.00000000	34.34000000	311.77716624	0.000000
2	-0.29000050	9.08156010	-2.63365697		2.00000000	17.17000000	155.93038692	0.061732
3	-0.27984732	9.09479050	-2.54515275		3.00000000	11.44666667	104.10503526	0.083267
4	-0.27005443	9.08193590	-2.45261702		4.00000000	8.58500000	77.96841970	0.104650
5	-0.25987002	9.08603290	-2.36118755		5.00000000	6.86800000	62.40287396	0.126017
6	-0.24975184	9.09334090	-2.27107862		6.00000000	5.72333333	52.04422108	0.147392
7	-0.23992543	9.08330730	-2.17931641		7.00000000	4.90571429	44.56011038	0.168870
8	-0.22976409	9.08773520	-2.08803521		8.00000000	4.29250000	39.00910335	0.190297
9	-0.21994290	9.09784130	-2.00100560		9.00000000	3.81555556	34.71331892	0.211663
10	-0.20981058	9.08322430	-1.90575656		10.00000000	3.43400000	31.19179225	0.233059
11	-0.19995515	9.09296700	-1.81818558		11.00000000	3.12181818	28.38658971	0.254553
12	-0.18982880	9.09036640	-1.72561335		12.00000000	2.86166667	26.01359851	0.275928
13	-0.18005449	9.08943560	-1.63659369		13.00000000	2.64153846	24.01009373	0.297285
14	-0.16990356	9.08098790	-1.54289217		14.00000000	2.45285714	22.27436603	0.318655
15	-0.16010545	9.09217740	-1.45570715		15.00000000	2.28933333	20.81502479	0.340143
16	-0.14995304	9.08190730	-1.36185961		16.00000000	2.14625000	19.49204354	0.361525
17	-0.13982296	9.08299730	-1.27001157		17.00000000	2.02000000	18.34765455	0.382876
18	-0.12996529	9.08636000	-1.18091141		18.00000000	1.90777778	17.33475569	0.404251
19	-0.11985307	9.08878140	-1.08931835		19.00000000	1.80736842	16.42677649	0.425732
20	-0.11002890	9.09035300	-1.00020154		20.00000000	1.71700000	15.60813610	0.447118
21	-0.09986085	9.09977530	-0.90871133		21.00000000	1.63523810	14.88029923	0.468474
22	-0.09006125	9.09027670	-0.81868166		22.00000000	1.56090909	14.18909554	0.489844
23	-0.07991256	9.09496120	-0.72680161		23.00000000	1.49304348	13.57917250	0.511320
24	-0.07005341	9.08391190	-0.63635897		24.00000000	1.43083333	12.99756394	0.532707
25	-0.05992258	9.08782860	-0.54456614		25.00000000	1.37360000	12.48304136	0.554053
26	-0.04976868	9.08147050	-0.45197279		26.00000000	1.32076923	11.99452681	0.575428
27	-0.03992293	9.10414410	-0.36346408		27.00000000	1.27185185	11.57912253	0.596891
28	-0.02983676	9.08358760	-0.27102480		28.00000000	1.22642857	11.14037136	0.618273
29	-0.01997984	9.10309310	-0.18187833		29.00000000	1.18413793	10.77931783	0.639649
30	-0.00985348	9.08475590	-0.08951643		30.00000000	1.14466667	10.39901725	0.661007
31	-0.00059424	9.08689880	-0.00539979		31.00000000	1.10774194	10.06593886	0.682608
32	0.00951033	9.08959390	0.08644502		32.00000000	1.07312500	9.75427045	0.703996
33	0.01936101	9.08494470	0.17589372		33.00000000	1.04060606	9.45384852	0.725389
34	0.02945210	9.07603360	0.26730827		34.00000000	1.01000000	9.16679394	0.746859
35	0.03929832	9.08646010	0.35708263		35.00000000	0.98114286	8.91511542	0.768317
36	0.04946905	9.09274290	0.44980935		36.00000000	0.95388889	8.67346642	0.789691
37	0.05924903	9.09034820	0.53859430		37.00000000	0.92810811	8.43682587	0.811069
38	0.06941529	9.08277510	0.63048350		38.00000000	0.90368421	8.20796045	0.832430
39	0.07957188	9.08644200	0.72302527		39.00000000	0.88051282	8.00072867	0.853914
40	0.08934516	9.09214880	0.81233946		40.00000000	0.85850000	7.80560974	0.875295
41	0.09956575	9.07582950	0.90364179		41.00000000	0.83756098	7.60156061	0.896702
42	0.10939113	9.09311200	0.99470580		42.00000000	0.81761905	7.43470157	0.918058
43	0.11950604	9.08517360	1.08573312		43.00000000	0.79860465	7.25546189	0.939530
44	0.12930240	9.07932950	1.17397909		44.00000000	0.78045455	7.08600398	0.960928
45	0.13944037	9.09560490	1.26829451		45.00000000	0.76311111	6.94095716	0.982313
46	0.14926277	9.07840160	1.35506737		46.00000000	0.74652174	6.77722415	1.003667
47	0.15942606	9.09010790	1.44920009		47.00000000	0.73063830	6.64158096	1.025144
48	0.16953650	9.07803730	1.53905867		48.00000000	0.71541667	6.49457919	1.046519
49	0.17940059	9.09259130	1.63121624		49.00000000	0.70081633	6.37223643	1.067902
50	0.18950731	9.08261870	1.72122264		50.00000000	0.68680000	6.23794252	1.089393
51	0.19932078	9.07831950	1.80949772		51.00000000	0.67333333	6.11273513	1.110759
52	0.20945057	9.08896640	1.90368919		52.00000000	0.66038462	6.00221358	1.132122
53	0.21930200	9.08833410	1.99308984		53.00000000	0.64792453	5.88855458	1.153496
54	0.22945784	9.07934090	2.08332595		54.00000000	0.63592593	5.77378827	1.174965
55	0.23924899	9.08927350	2.17459950		55.00000000	0.62436364	5.67501185	1.196373
56	0.24940929	9.07594680	2.26362545		56.00000000	0.61321429	5.56550023	1.217721
57	0.25954801	9.08874130	2.35896472		57.00000000	0.60245614	5.47556800	1.239093
58	0.26939794	9.07621190	2.44511279		58.00000000	0.59206897	5.37374339	1.260579
59	0.27951434	9.08336730	2.53893142		59.00000000	0.58203390	5.28682768	1.281953
60	0.28934494	9.08046530	2.62738669		60.00000000	0.57233333	5.19705297	1.303298
61	0.29948813	9.08750820	2.72160084		61.00000000	0.56295082	5.11582019	1.324684
62	0.30931649	9.07966420	2.80848986		62.00000000	0.55387097	5.02896240	1.346157
63	0.31944925	9.08786010	2.90311009		63.00000000	0.54507937	4.95360501	1.367536
64	0.32926199	9.08840270	2.99246556		64.00000000	0.53656250	4.87649607	1.388877
65	0.33941856	9.08920380	3.08504447		65.00000000	0.52830769	4.80189628	1.410251
66	0.34925362	9.09357740	3.17596483		66.00000000	0.52030303	4.73141588	1.431729
67	0.35941988	9.09634590	3.26940755		67.00000000	0.51253731	4.66221669	1.453119
68	0.36959806	9.07722660	3.35492534		68.00000000	0.50500000	4.58399943	1.474463
69	0.37935644	9.08205800	3.44533719		69.00000000	0.49768116	4.51996916	1.495839
70	0.38951007	9.08056550	3.53697170		70.00000000	0.49057143	4.45466599	1.517312
71	0.39937118	9.08911320	3.62992986		71.00000000	0.48366197	4.39605841	1.538687
72	0.40948758	9.07325940	3.71538703		72.00000000	0.47694444	4.32744066	1.560057
73	0.41930923	9.09058670	3.81176691		73.00000000	0.47041096	4.27631161	1.581427
74	0.42950377	9.10014630	3.90854714		74.00000000	0.46405405	4.22295978	1.602893
75	0.43928525	9.07239530	3.98536944		75.00000000	0.45786667	4.15394739	1.624286
76	0.44945672	9.09659000	4.08852350		76.00000000	0.45184211	4.11022238	1.645670
77	0.45959619	9.07232380	4.16960545		77.00000000	0.44597403	4.04602077	1.667023
78	0.46946546	9.07645030	4.26107992		78.00000000	0.44025641	3.99596543	1.688501
79	0.47960940	9.06198880	4.34621501		79.00000000	0.43468354	3.93909741	1.709885
80	0.48937523	9.06178000	4.43461067		80.00000000	0.42925000	3.88976907	1.731286
81	0.49955565	9.04798700	4.51997303		81.00000000	0.42395062	3.83589967	1.752763
82	0.50933117	9.02542780	4.59693170		82.00000000	0.41878049	3.77967306	1.774139
83	0.51945800	9.02311990	4.68713182		83.00000000	0.41373494	3.73317997	1.795498
84	0.52927816	8.98098560	4.75343953		84.00000000	0.40880952	3.67151245	1.816873
85	0.53939676	8.94333740	4.82400722		85.00000000	0.40400000	3.61310831	1.838347
86	0.54954666	8.88609890	4.88332597		86.00000000	0.39930233	3.54823996	1.859727
87	0.55938244	8.79560760	4.92010844		87.00000000	0.39471264	3.47173753	1.881073
88	0.56951821	8.65514470	4.92926252		88.00000000	0.39022727	3.37747351	1.902446
89	0.57935476	8.49814130	4.92343861		89.00000000	0.38584270	3.27894576	1.923940
90	0.58950090	8.25205610	4.86459450		90.00000000	0.38155556	3.14861785	1.945329
91	0.59926379	7.91689970	4.74431132		91.00000000	0.37736264	2.98754215	1.966694
92	0.60936606	7.47066930	4.55237232		92.00000000	0.37326087	2.78850852	1.988171
93	0.61916089	6.86896230	4.25299281		93.00000000	0.36924731	2.53634586	2.009678
94	0.62928027	6.06822920	3.81861691		94.00000000	0.36531915	2.21684033	2.031071
95	0.63939297	5.02482700	3.21283906		95.00000000	0.36147368	1.81634273	2.052420
96	0.64919448	3.76442620	2.44384471		96.00000000	0.35770833	1.34656662	2.073792
97	0.65931314	2.13724090	1.40911101		97.00000000	0.35402062	0.75662735	2.095275
98	0.66899782	0.25454339	0.17028897		98.00000000	0.35040816	0.08919408	2.116648
99	0.67913508	-2.07115650	-1.40659504		99.00000000	0.34686869	-0.71841934	2.137992
100	0.68883914	-4.69729850	-3.23568306		100.00000000	0.34340000	-1.61305230	2.159368
101	0.69907236	-7.86626910	-5.49909130		101.00000000	0.34000000	-2.67453149	2.180859
02:12 03/04/2018
Test Lot:	JK-PERC
Recipe:	Recipe_YJX-LID
Cell Name:	1-20-2-2h
Test Order:	3
Test Condition:	Light
1	-0.29986858	9.08742620	-2.72503359		1.00000000	34.34000000	312.06221571	0.000000
2	-0.29002357	9.08061600	-2.63359267		2.00000000	17.17000000	155.91417672	0.021634
3	-0.27986372	9.08467100	-2.54246982		3.00000000	11.44666667	103.98920071	0.043059
4	-0.27010056	9.07780360	-2.45191984		4.00000000	8.58500000	77.93294391	0.064406
5	-0.25992286	9.09603400	-2.36426717		5.00000000	6.86800000	62.47156151	0.085792
6	-0.24977863	9.08852100	-2.27011832		6.00000000	5.72333333	52.01663519	0.107279
7	-0.23994479	9.08072090	-2.17887167		7.00000000	4.90571429	44.54742224	0.128650
8	-0.22979461	9.09339710	-2.08961364		8.00000000	4.29250000	39.03340705	0.150065
9	-0.21998681	9.08339410	-1.99822689		9.00000000	3.81555556	34.65819482	0.171505
10	-0.20982696	9.09235950	-1.90782215		10.00000000	3.43400000	31.22316252	0.192994
11	-0.20002735	9.08525180	-1.81729884		11.00000000	3.12181818	28.36250426	0.214380
12	-0.18987419	9.07852460	-1.72377750		12.00000000	2.86166667	25.97971123	0.235714
13	-0.18011701	9.09362600	-1.63791673		13.00000000	2.64153846	24.02116283	0.257090
14	-0.16992292	9.08952900	-1.54451931		14.00000000	2.45285714	22.29531613	0.278572
15	-0.16008684	9.08814720	-1.45489277		15.00000000	2.28933333	20.80579832	0.299951
16	-0.14992699	9.08601280	-1.36223855		16.00000000	2.14625000	19.50085497	0.321312
17	-0.13977607	9.07976150	-1.26913338		17.00000000	2.02000000	18.34111823	0.342719
18	-0.12995858	9.08035560	-1.18007012		18.00000000	1.90777778	17.32330063	0.364197
19	-0.11982404	9.08530710	-1.08863820		19.00000000	1.80736842	16.42049715	0.385586
20	-0.11004155	9.08062270	-0.99924580		20.00000000	1.71700000	15.59142918	0.406933
21	-0.09984597	9.09241960	-0.90784144		21.00000000	1.63523810	14.86827091	0.428297
22	-0.09003520	9.08441540	-0.81791716		22.00000000	1.56090909	14.17994658	0.449783
23	-0.07990363	9.08466910	-0.72589799		23.00000000	1.49304348	13.56380595	0.471148
24	-0.07008392	9.08215620	-0.63651314		24.00000000	1.43083333	12.99505183	0.492538
25	-0.05991216	9.08708100	-0.54442665		25.00000000	1.37360000	12.48201446	0.513915
26	-0.04980813	9.08433530	-0.45247375		26.00000000	1.32076923	11.99831055	0.535391
27	-0.03994004	9.07969950	-0.36264360		27.00000000	1.27185185	11.54803262	0.556780
28	-0.02980699	9.08114340	-0.27068151		28.00000000	1.22642857	11.13737373	0.578156
29	-0.01994486	9.07811070	-0.18106161		29.00000000	1.18413793	10.74973522	0.599489
30	-0.00979840	9.09167000	-0.08908380		30.00000000	1.14466667	10.40693159	0.620961
31	-0.00063815	9.07412240	-0.00579069		31.00000000	1.10774194	10.05178591	0.642445
32	0.00948204	9.09598260	0.08624851		32.00000000	1.07312500	9.76112633	0.663837
33	0.01928212	9.08020690	0.17508561		33.00000000	1.04060606	9.44891833	0.685257
34	0.02942457	9.09110070	0.26750168		34.00000000	1.01000000	9.18201171	0.706732
35	0.03924622	9.09031490	0.35676050		35.00000000	0.98114286	8.91889753	0.728106
36	0.04940951	9.09924980	0.44958946		36.00000000	0.95388889	8.67967328	0.749513
37	0.05922744	9.08750630	0.53822977		37.00000000	0.92810811	8.43418828	0.770872
38	0.06938180	9.09406470	0.63096254		38.00000000	0.90368421	8.21816268	0.792345
39	0.07949373	9.07863520	0.72169458		39.00000000	0.88051282	7.99385469	0.813727
40	0.08935260	9.09972570	0.81308415		40.00000000	0.85850000	7.81211451	0.835081
41	0.09954045	9.09070210	0.90489258		41.00000000	0.83756098	7.61401732	0.856448
42	0.10929438	9.07962130	0.99235158		42.00000000	0.81761905	7.42367132	0.877937
43	0.11948297	9.09818840	1.08707857		43.00000000	0.79860465	7.26585557	0.899310
44	0.12927857	9.06999210	1.17255561		44.00000000	0.78045455	7.07871656	0.920708
45	0.13942027	9.09345720	1.26781226		45.00000000	0.76311111	6.93931823	0.942052
46	0.14925683	9.07870010	1.35505800		46.00000000	0.74652174	6.77744699	0.963524
47	0.15942532	9.08547210	1.44845430		47.00000000	0.73063830	6.63819387	0.984910
48	0.16956478	9.08395000	1.54031798		48.00000000	0.71541667	6.49880923	1.006293
49	0.17940728	9.08245180	1.62945797		49.00000000	0.70081633	6.36513051	1.027770
50	0.18954675	9.08070560	1.72121823		50.00000000	0.68680000	6.23662861	1.049166
51	0.19931333	9.09100720	1.81195892		51.00000000	0.67333333	6.12127818	1.070518
52	0.20945355	9.07926940	1.90168521		52.00000000	0.66038462	5.99580983	1.091892
53	0.21928935	9.07643510	1.99036555		53.00000000	0.64792453	5.88084493	1.113371
54	0.22940053	9.09054660	2.08537621		54.00000000	0.63592593	5.78091426	1.134750
55	0.23926684	9.08722590	2.17427183		55.00000000	0.62436364	5.67373341	1.156109
56	0.24936166	9.08818240	2.26624425		56.00000000	0.61321429	5.57300328	1.177494
57	0.25952718	9.08584790	2.35802448		57.00000000	0.60245614	5.47382486	1.198967
58	0.26937860	9.08912660	2.44841620		58.00000000	0.59206897	5.38138978	1.220346
59	0.27951065	9.08591270	2.53960936		59.00000000	0.58203390	5.28830919	1.241685
60	0.28935984	9.08060260	2.62756172		60.00000000	0.57233333	5.19713155	1.263061
61	0.29948366	9.08229640	2.71999937		61.00000000	0.56295082	5.11288620	1.284535
62	0.30929565	9.08890150	2.81115770		62.00000000	0.55387097	5.03407867	1.305927
63	0.31948200	9.08871650	2.90368132		63.00000000	0.54507937	4.95407182	1.327273
64	0.32924488	9.08124160	2.98995230		64.00000000	0.53656250	4.87265370	1.348651
65	0.33942825	9.08168030	3.08257885		65.00000000	0.52830769	4.79792156	1.370126
66	0.34924766	9.08048060	3.17133660		66.00000000	0.52030303	4.72460157	1.391489
67	0.35936555	9.07720470	3.26203466		67.00000000	0.51253731	4.65240611	1.412855
68	0.36953032	9.08332440	3.35656377		68.00000000	0.50500000	4.58707882	1.434233
69	0.37936538	9.07235530	3.44173752		69.00000000	0.49768116	4.51514030	1.455703
70	0.38952720	9.08152010	3.53749910		70.00000000	0.49057143	4.45513429	1.477089
71	0.39932057	9.08362770	3.62727939		71.00000000	0.48366197	4.39340528	1.498440
72	0.40948385	9.07742500	3.71705894		72.00000000	0.47694444	4.32942742	1.519818
73	0.41931519	9.08732130	3.81045186		73.00000000	0.47041096	4.27477553	1.541288
74	0.42945763	9.08502010	3.90163120		74.00000000	0.46405405	4.21594041	1.562673
75	0.43927929	9.08584790	3.99122481		75.00000000	0.45786667	4.16010689	1.584062
76	0.44945449	9.07418730	4.07843423		76.00000000	0.45184211	4.10009989	1.605403
77	0.45954782	9.07988640	4.17264200		77.00000000	0.44597403	4.04939349	1.626872
78	0.46940148	9.07249550	4.25864281		78.00000000	0.44025641	3.99422430	1.648253
79	0.47957444	9.07058620	4.35002130		79.00000000	0.43468354	3.94283456	1.669639
80	0.48937970	9.04757500	4.42769954		80.00000000	0.42925000	3.88367157	1.691116
81	0.49952438	9.04687600	4.51913512		81.00000000	0.42395062	3.83542866	1.712494
82	0.50932074	9.03749180	4.60298201		82.00000000	0.41878049	3.78472522	1.733837
83	0.51947361	9.01648810	4.68382762		83.00000000	0.41373494	3.73043616	1.755213
84	0.52927518	8.97142030	4.74835009		84.00000000	0.40880952	3.66760206	1.776685
85	0.53941536	8.94936180	4.82742322		85.00000000	0.40400000	3.61554217	1.798066
86	0.54954445	8.86346820	4.87086976		86.00000000	0.39930233	3.53920346	1.819420
87	0.55936682	8.79640670	4.92041804		87.00000000	0.39471264	3.47205294	1.840792
88	0.56950259	8.65800000	4.93075342		88.00000000	0.39022727	3.37858773	1.862266
89	0.57929671	8.48993210	4.91818973		89.00000000	0.38584270	3.27577830	1.883654
90	0.58943170	8.25499150	4.86575367		90.00000000	0.38155556	3.14973787	1.905006
91	0.59928089	7.91931010	4.74589120		91.00000000	0.37736264	2.98845175	1.926373
92	0.60938090	7.47034880	4.55228788		92.00000000	0.37326087	2.78838889	1.947860
93	0.61913413	6.87020870	4.25358069		93.00000000	0.36924731	2.53680609	1.969228
94	0.62927133	6.06752160	3.81811739		94.00000000	0.36531915	2.21658183	1.990687
95	0.63938177	5.03767920	3.22100024		95.00000000	0.36147368	1.82098846	2.012097
96	0.64920121	3.76790480	2.44612836		96.00000000	0.35770833	1.34781095	2.033595
97	0.65928185	2.13871430	1.41001552		97.00000000	0.35402062	0.75714896	2.054992
98	0.66898888	0.24960735	0.16698454		98.00000000	0.35040816	0.08746445	2.076348
99	0.67906886	-2.09096000	-1.41990582		99.00000000	0.34686869	-0.72528855	2.097726
100	0.68882650	-4.72797970	-3.25675771		100.00000000	0.34340000	-1.62358823	2.119200
101	0.69901580	-7.91299530	-5.53130874		101.00000000	0.34000000	-2.69041840	2.140567
02:12 03/04/2018
Test Lot:	JK-PERC
Recipe:	Recipe_YJX-LID
Cell Name:	1-20-2-2h
Test Order:	4
Test Condition:	Light
1	-0.29979852	9.09192660	-2.72574614		1.00000000	34.34000000	312.21675944	0.000000
2	-0.28997281	9.08990380	-2.63582495		2.00000000	17.17000000	156.07364825	0.061784
3	-0.27988213	9.07846070	-2.54089892		3.00000000	11.44666667	103.91811348	0.083237
4	-0.27005199	9.09686760	-2.45662720		4.00000000	8.58500000	78.09660835	0.104591
5	-0.25988463	9.08259580	-2.36042705		5.00000000	6.86800000	62.37926795	0.126086
6	-0.24970910	9.08635620	-2.26894583		6.00000000	5.72333333	52.00424532	0.147532
7	-0.23988859	9.08640960	-2.17972599		7.00000000	4.90571429	44.57532938	0.168933
8	-0.22977932	9.08140470	-2.08671900		8.00000000	4.29250000	38.98192967	0.190355
9	-0.21991415	9.09118750	-1.99928077		9.00000000	3.81555556	34.68793097	0.211823
10	-0.20977882	9.07716940	-1.90419789		10.00000000	3.43400000	31.17099972	0.233191
11	-0.19995460	9.07522490	-1.81463296		11.00000000	3.12181818	28.33120210	0.254581
12	-0.18980512	9.09390740	-1.72607019		12.00000000	2.86166667	26.02373168	0.275938
13	-0.17999877	9.08328530	-1.63498018		13.00000000	2.64153846	23.99384748	0.297433
14	-0.16989841	9.09760570	-1.54566874		14.00000000	2.45285714	22.31512712	0.318806
15	-0.16007642	9.08426190	-1.45417612		15.00000000	2.28933333	20.79690358	0.340172
16	-0.14994332	9.07817550	-1.36121177		16.00000000	2.14625000	19.48403417	0.361527
17	-0.13978343	9.09340190	-1.27110691		17.00000000	2.02000000	18.36867184	0.382997
18	-0.12994507	9.08231070	-1.18020150		18.00000000	1.90777778	17.32703052	0.404384
19	-0.11980452	9.09667400	-1.08982266		19.00000000	1.80736842	16.44104132	0.425772
20	-0.10999890	9.07439900	-0.99817391		20.00000000	1.71700000	15.58074308	0.447131
21	-0.09985761	9.09918590	-0.90862298		21.00000000	1.63523810	14.87933542	0.468606
22	-0.09000660	9.09761240	-0.81884513		22.00000000	1.56090909	14.20054590	0.489976
23	-0.07991443	9.08092590	-0.72569700		23.00000000	1.49304348	13.55821719	0.511370
24	-0.07006491	9.08322330	-0.63641522		24.00000000	1.43083333	12.99657867	0.532869
25	-0.05992659	9.08097360	-0.54419180		25.00000000	1.37360000	12.47362534	0.554256
26	-0.04976371	9.07581040	-0.45164602		26.00000000	1.32076923	11.98705112	0.575613
27	-0.03994247	9.07996460	-0.36267624		27.00000000	1.27185185	11.54836979	0.596991
28	-0.02980862	9.08471680	-0.27080289		28.00000000	1.22642857	11.14175625	0.618469
29	-0.01997473	9.08166980	-0.18140391		29.00000000	1.18413793	10.75394969	0.639856
30	-0.00984981	9.08876710	-0.08952265		30.00000000	1.14466667	10.40360874	0.661225
31	-0.00063221	9.08909800	-0.00574624		31.00000000	1.10774194	10.06837501	0.682721
32	0.00951334	9.09352490	0.08650979		32.00000000	1.07312500	9.75848891	0.704201
33	0.01936184	9.08773610	0.17595527		33.00000000	1.04060606	9.45675326	0.725570
34	0.02946265	9.09026620	0.26782333		34.00000000	1.01000000	9.18116886	0.746929
35	0.03932529	9.08045670	0.35709158		35.00000000	0.98114286	8.90922523	0.768298
36	0.04945960	9.08078190	0.44913180		36.00000000	0.95388889	8.66205696	0.789772
37	0.05925525	9.09590150	0.53897992		37.00000000	0.92810811	8.44197993	0.811162
38	0.06942082	9.08763790	0.63087123		38.00000000	0.90368421	8.21235488	0.832504
39	0.07957819	9.07439040	0.72212357		39.00000000	0.88051282	7.99011709	0.853874
40	0.08939692	9.09489820	0.81305592		40.00000000	0.85850000	7.80797010	0.875356
41	0.09954686	9.08448700	0.90433213		41.00000000	0.83756098	7.60881179	0.896743
42	0.10936186	9.09029100	0.99413113		42.00000000	0.81761905	7.43239507	0.918102
43	0.11948723	9.08552840	1.08560462		43.00000000	0.79860465	7.25574524	0.939482
44	0.12934020	9.09558960	1.17642538		44.00000000	0.78045455	7.09869425	0.960956
45	0.13947897	9.07172870	1.26531538		45.00000000	0.76311111	6.92273697	0.982329
46	0.14926793	9.08067230	1.35545316		46.00000000	0.74652174	6.77891928	1.003710
47	0.15948410	9.09038450	1.44977179		47.00000000	0.73063830	6.64178306	1.025067
48	0.16959906	9.07762430	1.53955655		48.00000000	0.71541667	6.49428372	1.046541
49	0.17939322	9.08300690	1.62942986		49.00000000	0.70081633	6.36551953	1.067907
50	0.18952084	9.08345410	1.72150385		50.00000000	0.68680000	6.23851628	1.089302
51	0.19934328	9.08496570	1.81102686		51.00000000	0.67333333	6.11721024	1.110662
52	0.20943740	9.08771610	1.90330763		52.00000000	0.66038462	6.00138790	1.132137
53	0.21931268	9.08414840	1.99226893		53.00000000	0.64792453	5.88584257	1.153512
54	0.22944401	9.08945660	2.08552137		54.00000000	0.63592593	5.78022110	1.174904
55	0.23930070	9.07926650	2.17267483		55.00000000	0.62436364	5.66876385	1.196387
56	0.24941416	9.08563520	2.26608607		56.00000000	0.61321429	5.57144130	1.217757
57	0.25955889	9.08356760	2.35772072		57.00000000	0.60245614	5.47245108	1.239110
58	0.26939771	9.08847050	2.44841314		58.00000000	0.59206897	5.38100133	1.260489
59	0.27955285	9.08552460	2.53988430		59.00000000	0.58203390	5.28808330	1.281955
60	0.28937158	9.08321860	2.62842532		60.00000000	0.57233333	5.19862878	1.303351
61	0.29951707	9.08503060	2.72112175		61.00000000	0.56295082	5.11442542	1.324690
62	0.30933207	9.08486080	2.81023880		62.00000000	0.55387097	5.03184064	1.346076
63	0.31949392	9.09210490	2.90487224		63.00000000	0.54507937	4.95591877	1.367552
64	0.32929105	9.07522010	2.98838876		64.00000000	0.53656250	4.86942278	1.388929
65	0.33944768	9.09260080	3.08646225		65.00000000	0.52830769	4.80369095	1.410304
66	0.34923291	9.07836910	3.17046526		66.00000000	0.52030303	4.72350295	1.431678
67	0.35943273	9.08966160	3.26712188		67.00000000	0.51253731	4.65879074	1.453148
68	0.36958787	9.08154770	3.35642987		68.00000000	0.50500000	4.58618159	1.474523
69	0.37940213	9.07256130	3.44214908		69.00000000	0.49768116	4.51524283	1.495873
70	0.38952452	9.08191010	3.53762667		70.00000000	0.49057143	4.45532561	1.517245
71	0.39938492	9.08661650	3.62905760		71.00000000	0.48366197	4.39485085	1.538726
72	0.40952668	9.08296680	3.71971724		72.00000000	0.47694444	4.33207055	1.560096
73	0.41935360	9.08142760	3.80832936		73.00000000	0.47041096	4.27200307	1.581436
74	0.42946705	9.07585720	3.89778162		74.00000000	0.46405405	4.21168833	1.602813
75	0.43928728	9.08448700	3.99069958		75.00000000	0.45786667	4.15948378	1.624293
76	0.44947889	9.07598590	4.07946407		76.00000000	0.45184211	4.10091258	1.645688
77	0.45961469	9.06839940	4.16796958		77.00000000	0.44597403	4.04427059	1.667054
78	0.46945426	9.07056710	4.25821637		78.00000000	0.44025641	3.99337531	1.688419
79	0.47959375	9.06131360	4.34574937		79.00000000	0.43468354	3.93880391	1.709897
80	0.48939016	9.06700800	4.43730450		80.00000000	0.42925000	3.89201318	1.731269
81	0.49952745	9.05209350	4.52176918		81.00000000	0.42395062	3.83764063	1.752650
82	0.50935882	9.03107450	4.60005745		82.00000000	0.41878049	3.78203778	1.774004
83	0.51951247	9.01424790	4.68301419		83.00000000	0.41373494	3.72950931	1.795477
84	0.52930367	8.97574040	4.75089233		84.00000000	0.40880952	3.66936816	1.816849
85	0.53942609	8.94928460	4.82747760		85.00000000	0.40400000	3.61551098	1.838251
86	0.54956484	8.87969490	4.87996811		86.00000000	0.39930233	3.54568282	1.859715
87	0.55935603	8.78837780	4.91583212		87.00000000	0.39471264	3.46888384	1.881089
88	0.56953722	8.67344670	4.93985072		88.00000000	0.39022727	3.38461545	1.902457
89	0.57936192	8.49854950	4.92373596		89.00000000	0.38584270	3.27910326	1.923835
90	0.58945304	8.25845430	4.86797099		90.00000000	0.38155556	3.15105912	1.945314
91	0.59925389	7.93105360	4.75271472		91.00000000	0.37736264	2.99288330	1.966682
92	0.60935247	7.48441740	4.56064823		92.00000000	0.37326087	2.79364015	1.988145
93	0.61917865	6.90462640	4.27519725		93.00000000	0.36924731	2.54951474	2.009551
94	0.62928766	6.09386490	3.83479398		94.00000000	0.36531915	2.22620554	2.031044
95	0.63941455	5.05561830	3.23263590		95.00000000	0.36147368	1.82747297	2.052431
96	0.64920795	3.79863000	2.46610080		96.00000000	0.35770833	1.35880161	2.073791
97	0.65932590	2.14769340	1.41602988		97.00000000	0.35402062	0.76032775	2.095165
98	0.66900319	0.25562739	0.17101554		98.00000000	0.35040816	0.08957392	2.116645
99	0.67913598	-2.13191320	-1.44785896		99.00000000	0.34686869	-0.73949393	2.138024
100	0.68884832	-4.81348900	-3.31576381		100.00000000	0.34340000	-1.65295212	2.159472
101	0.69905776	-8.06596950	-5.63857857		101.00000000	0.34000000	-2.74242963	2.180862
