# Supplementary material for: Study on the Electrical Injection Regeneration of Industrialized B-Doped Czochralski Silicon PERC Solar Cells
Source: Hindawi journal article supplement (doi:10.1155/2019/5357370), 2019-06-20
Supplement: f1 [file 5357370.f1.zip › section3.1/IVRawData_1-20-2-3h.csv]

03:14 03/04/2018
Test Lot:	JK-PERC
Recipe:	Recipe_YJX-LID
Cell Name:	1-20-2-3h
Test Order:	2
Test Condition:	Light
1	-0.29980439	9.08167550	-2.72272618		1.00000000	34.34000000	311.86473667	0.000000
2	-0.29003462	9.09066870	-2.63660864		2.00000000	17.17000000	156.08678158	0.061746
3	-0.27985996	9.08253480	-2.54183783		3.00000000	11.44666667	103.96474834	0.083221
4	-0.27005672	9.08449940	-2.45333011		4.00000000	8.58500000	77.99042735	0.104668
5	-0.25988653	9.09239290	-2.36299044		5.00000000	6.86800000	62.44655444	0.126035
6	-0.24973568	9.09612270	-2.27162639		6.00000000	5.72333333	52.06014225	0.147418
7	-0.23995997	9.08740810	-2.18061418		7.00000000	4.90571429	44.58022774	0.168920
8	-0.22978456	9.09380630	-2.08961628		8.00000000	4.29250000	39.03516354	0.190372
9	-0.21995899	9.08089920	-1.99742542		9.00000000	3.81555556	34.64867539	0.211744
10	-0.20983866	9.09185500	-1.90782267		10.00000000	3.43400000	31.22143007	0.233134
11	-0.19998702	9.09209920	-1.81830182		11.00000000	3.12181818	28.38388059	0.254618
12	-0.18984139	9.09344100	-1.72631148		12.00000000	2.86166667	26.02239700	0.275994
13	-0.18003145	9.08905700	-1.63631611		13.00000000	2.64153846	24.00909364	0.297354
14	-0.16991261	9.08909510	-1.54435187		14.00000000	2.45285714	22.29425184	0.318727
15	-0.16008703	9.10262390	-1.45721203		15.00000000	2.28933333	20.83894032	0.340200
16	-0.14996150	9.08881470	-1.36297229		16.00000000	2.14625000	19.50686855	0.361600
17	-0.13978088	9.09159180	-1.27083070		17.00000000	2.02000000	18.36501544	0.382945
18	-0.12997986	9.08591940	-1.18098653		18.00000000	1.90777778	17.33391512	0.404308
19	-0.11983944	9.10589980	-1.09124593		19.00000000	1.80736842	16.45771574	0.425809
20	-0.11000419	9.09009460	-0.99994849		20.00000000	1.71700000	15.60769243	0.447189
21	-0.09982655	9.09694190	-0.90811628		21.00000000	1.63523810	14.87566595	0.468547
22	-0.09002404	9.08897500	-0.81822624		22.00000000	1.56090909	14.18706370	0.489924
23	-0.07987990	9.08537010	-0.72573841		23.00000000	1.49304348	13.56485258	0.511408
24	-0.07007218	9.08607480	-0.63668109		24.00000000	1.43083333	13.00065869	0.532785
25	-0.05989827	9.08488660	-0.54416895		25.00000000	1.37360000	12.47900023	0.554124
26	-0.04975487	9.08419900	-0.45198313		26.00000000	1.32076923	11.99813053	0.575499
27	-0.03993524	9.09460740	-0.36319535		27.00000000	1.27185185	11.56699326	0.596987
28	-0.02980003	9.08168700	-0.27063454		28.00000000	1.22642857	11.13804041	0.618362
29	-0.01996552	9.09806820	-0.18164764		29.00000000	1.18413793	10.77336765	0.639699
30	-0.00982659	9.07915210	-0.08921707		30.00000000	1.14466667	10.39260277	0.661077
31	-0.00063069	9.08867650	-0.00573212		31.00000000	1.10774194	10.06790810	0.682678
32	0.00950878	9.10480020	0.08657555		32.00000000	1.07312500	9.77058871	0.704059
33	0.01931845	9.07376000	0.17529098		33.00000000	1.04060606	9.44220965	0.725439
34	0.02940872	9.09023000	0.26733199		34.00000000	1.01000000	9.18113230	0.746783
35	0.03926602	9.09522440	0.35713326		35.00000000	0.98114286	8.92371445	0.768242
36	0.04942253	9.08966060	0.44923401		36.00000000	0.95388889	8.67052625	0.789617
37	0.05924783	9.09718230	0.53898830		37.00000000	0.92810811	8.44316865	0.810992
38	0.06938796	9.08687020	0.63051936		38.00000000	0.90368421	8.21166112	0.832404
39	0.07955191	9.07974150	0.72231081		39.00000000	0.88051282	7.99482880	0.853861
40	0.08935339	9.09098720	0.81231052		40.00000000	0.85850000	7.80461251	0.875227
41	0.09950841	9.10003090	0.90552962		41.00000000	0.83756098	7.62183076	0.896599
42	0.10932031	9.08637330	0.99332515		42.00000000	0.81761905	7.42919188	0.917966
43	0.11947682	9.09359070	1.08647330		43.00000000	0.79860465	7.26218383	0.939452
44	0.12933189	9.08932400	1.17553945		44.00000000	0.78045455	7.09380423	0.960848
45	0.13945714	9.08204270	1.26655570		45.00000000	0.76311111	6.93060770	0.982217
46	0.14926904	9.09408280	1.35746501		46.00000000	0.74652174	6.78893051	1.003581
47	0.15939280	9.09441180	1.44958376		47.00000000	0.73063830	6.64472556	1.025061
48	0.16957536	9.08651830	1.54084961		48.00000000	0.71541667	6.50064663	1.046434
49	0.17938131	9.09169200	1.63087962		49.00000000	0.70081633	6.37160619	1.067818
50	0.18954153	9.08717440	1.72239694		50.00000000	0.68680000	6.24107138	1.089155
51	0.19931920	9.07785220	1.80939024		51.00000000	0.67333333	6.11242048	1.110631
52	0.20946306	9.09975050	1.90606158		52.00000000	0.66038462	6.00933523	1.132024
53	0.21930398	9.08687880	1.99278869		53.00000000	0.64792453	5.88761166	1.153402
54	0.22943668	9.09720710	2.08723299		54.00000000	0.63592593	5.78514985	1.174889
55	0.23926197	9.08306410	2.17323181		55.00000000	0.62436364	5.67113493	1.196275
56	0.24938275	9.08436580	2.26548413		56.00000000	0.61321429	5.57066289	1.217629
57	0.25956902	9.08028220	2.35695995		57.00000000	0.60245614	5.47047177	1.238993
58	0.26939955	9.08854770	2.44845066		58.00000000	0.59206897	5.38104703	1.260468
59	0.27951288	9.08378790	2.53903572		59.00000000	0.58203390	5.28707248	1.281851
60	0.28933150	9.09404470	2.63119359		60.00000000	0.57233333	5.20482492	1.303217
61	0.29947385	9.08637140	2.72113063		61.00000000	0.56295082	5.11518023	1.324595
62	0.30933636	9.08695700	2.81092620		62.00000000	0.55387097	5.03300167	1.346060
63	0.31946385	9.09116940	2.90429998		63.00000000	0.54507937	4.95540884	1.367440
64	0.32925713	9.08304020	2.99065575		64.00000000	0.53656250	4.87361876	1.388791
65	0.33942929	9.08415220	3.08342733		65.00000000	0.52830769	4.79922749	1.410156
66	0.34923968	9.09892080	3.17770419		66.00000000	0.52030303	4.73419606	1.431642
67	0.35937983	9.08332250	3.26436290		67.00000000	0.51253731	4.65554171	1.453013
68	0.36955717	9.08817390	3.35859983		68.00000000	0.50500000	4.58952782	1.474355
69	0.37937799	9.08875940	3.44807527		69.00000000	0.49768116	4.52330432	1.495743
70	0.38951293	9.07349300	3.53424284		70.00000000	0.49057143	4.45119642	1.517222
71	0.39935386	9.10087680	3.63447028		71.00000000	0.48366197	4.40174802	1.538605
72	0.40948504	9.07714460	3.71695492		72.00000000	0.47694444	4.32929369	1.559968
73	0.41931781	9.08549880	3.80971146		73.00000000	0.47041096	4.27391820	1.581344
74	0.42944974	9.08112810	3.89988810		74.00000000	0.46405405	4.21413431	1.602826
75	0.43926761	9.08970450	3.99281277		75.00000000	0.45786667	4.16187270	1.624210
76	0.44943154	9.08832930	4.08458183		76.00000000	0.45184211	4.10648984	1.645561
77	0.45959476	9.07448480	4.17058566		77.00000000	0.44597403	4.04698452	1.666930
78	0.46944314	9.07616140	4.26074171		78.00000000	0.44025641	3.99583824	1.688409
79	0.47957656	9.07090280	4.35019236		79.00000000	0.43468354	3.94297218	1.709789
80	0.48939443	9.06293110	4.43534800		80.00000000	0.42925000	3.89026317	1.731166
81	0.49951893	9.04270650	4.51700308		81.00000000	0.42395062	3.83366100	1.752505
82	0.50932264	9.04160020	4.60509168		82.00000000	0.41878049	3.78644574	1.773983
83	0.51950073	9.02212520	4.68700063		83.00000000	0.41373494	3.73276843	1.795371
84	0.52927393	8.97921750	4.75246573		84.00000000	0.40880952	3.67078963	1.816756
85	0.53941482	8.93972680	4.82222112		85.00000000	0.40400000	3.61164963	1.838230
86	0.54954153	8.87375830	4.87649871		86.00000000	0.39930233	3.54331233	1.859617
87	0.55937803	8.78766820	4.91562853		87.00000000	0.39471264	3.46860375	1.880965
88	0.56949657	8.66060540	4.93218507		88.00000000	0.39022727	3.37960443	1.902339
89	0.57932633	8.47575660	4.91022897		89.00000000	0.38584270	3.27030878	1.923834
90	0.58945304	8.21754740	4.84385830		90.00000000	0.38155556	3.13545086	1.945212
91	0.59924263	7.89339490	4.73005872		91.00000000	0.37736264	2.97867232	1.966568
92	0.60935074	7.42239050	4.52283914		92.00000000	0.37326087	2.77048793	1.988038
93	0.61916041	6.81308940	4.21839523		93.00000000	0.36924731	2.51571495	2.009536
94	0.62927526	5.99644520	3.77341461		94.00000000	0.36531915	2.19061626	2.030924
95	0.63938415	4.96669010	3.17562293		95.00000000	0.36147368	1.79532777	2.052282
96	0.64915287	3.68344810	2.39112091		96.00000000	0.35770833	1.31760008	2.073656
97	0.65927440	2.09069420	1.37834116		97.00000000	0.35402062	0.74014885	2.095149
98	0.66898137	0.21331950	0.14270677		98.00000000	0.35040816	0.07474889	2.116532
99	0.67907757	-2.06824640	-1.40449974		99.00000000	0.34686869	-0.71740991	2.137873
100	0.68879718	-4.65044210	-3.20321140		100.00000000	0.34340000	-1.59696182	2.159252
101	0.69902587	-7.72971060	-5.40326768		101.00000000	0.34000000	-2.62810160	2.180789
03:15 03/04/2018
Test Lot:	JK-PERC
Recipe:	Recipe_YJX-LID
Cell Name:	1-20-2-3h
Test Order:	3
Test Condition:	Light
1	-0.29982635	9.08577820	-2.72415571		1.00000000	34.34000000	312.00562339	0.000000
2	-0.29000282	9.09283540	-2.63694791		2.00000000	17.17000000	156.12398382	0.061833
3	-0.27983910	9.09306240	-2.54459440		3.00000000	11.44666667	104.08525427	0.083259
4	-0.27001554	9.08266260	-2.45246005		4.00000000	8.58500000	77.97465842	0.104761
5	-0.25988981	9.08815480	-2.36191882		5.00000000	6.86800000	62.41744717	0.126135
6	-0.24970376	9.08468340	-2.26847960		6.00000000	5.72333333	51.99467133	0.147488
7	-0.23986234	9.09608170	-2.18180744		7.00000000	4.90571429	44.62277794	0.168867
8	-0.22975074	9.08720020	-2.08779097		8.00000000	4.29250000	39.00680686	0.190361
9	-0.21991378	9.08033470	-1.99689073		9.00000000	3.81555556	34.64652151	0.211749
10	-0.20974636	9.09969140	-1.90862715		10.00000000	3.43400000	31.24834027	0.233101
11	-0.19993769	9.08953480	-1.81734059		11.00000000	3.12181818	28.37587500	0.254471
12	-0.18979557	9.09732630	-1.72663223		12.00000000	2.86166667	26.03351543	0.275938
13	-0.17999285	9.07830520	-1.63403003		13.00000000	2.64153846	23.98069235	0.297315
14	-0.16987678	9.09918210	-1.54573976		14.00000000	2.45285714	22.31899381	0.318708
15	-0.16006662	9.08734890	-1.45458122		15.00000000	2.28933333	20.80397075	0.340059
16	-0.14993121	9.09029390	-1.36291876		16.00000000	2.14625000	19.51004328	0.361541
17	-0.13977940	9.09433080	-1.27120010		17.00000000	2.02000000	18.37054822	0.382921
18	-0.12995882	9.08532430	-1.18071803		18.00000000	1.90777778	17.33277980	0.404297
19	-0.11980405	9.08477880	-1.08839329		19.00000000	1.80736842	16.41954232	0.425710
20	-0.11000357	9.09377000	-1.00034716		20.00000000	1.71700000	15.61400309	0.447172
21	-0.09983316	9.08622070	-0.90710613		21.00000000	1.63523810	14.85813423	0.468538
22	-0.09002077	9.09332940	-0.81858850		22.00000000	1.56090909	14.19386053	0.489892
23	-0.07985558	9.10023690	-0.72670466		23.00000000	1.49304348	13.58704935	0.511250
24	-0.07003574	9.07764150	-0.63575935		24.00000000	1.43083333	12.98859205	0.532734
25	-0.05989734	9.08521560	-0.54418026		25.00000000	1.37360000	12.47945215	0.554109
26	-0.04975596	9.09501840	-0.45253138		26.00000000	1.32076923	12.01242046	0.575477
27	-0.03996441	9.08626370	-0.36312718		27.00000000	1.27185185	11.55638131	0.596836
28	-0.02977912	9.09822080	-0.27093699		28.00000000	1.22642857	11.15831794	0.618312
29	-0.01996747	9.09215160	-0.18154730		29.00000000	1.18413793	10.76636158	0.639694
30	-0.00982684	9.09356980	-0.08936105		30.00000000	1.14466667	10.40910623	0.661077
31	-0.00061735	9.09010030	-0.00561177		31.00000000	1.10774194	10.06948530	0.682590
32	0.00952978	9.07451920	0.08647813		32.00000000	1.07312500	9.73809342	0.704069
33	0.01934709	9.10405160	0.17613694		33.00000000	1.04060606	9.47373127	0.725443
34	0.02948000	9.08064370	0.26769735		34.00000000	1.01000000	9.17145014	0.746834
35	0.03929881	9.09253500	0.35732577		35.00000000	0.98114286	8.92107577	0.768310
36	0.04944510	9.08939650	0.44942616		36.00000000	0.95388889	8.67027433	0.789692
37	0.05929815	9.09239480	0.53916219		37.00000000	0.92810811	8.43872534	0.811054
38	0.06943180	9.08930110	0.63108651		38.00000000	0.90368421	8.21385789	0.832425
39	0.07960713	9.09993840	0.72441997		39.00000000	0.88051282	8.01261243	0.853907
40	0.08939914	9.08830450	0.81248658		40.00000000	0.85850000	7.80230941	0.875288
41	0.09954619	9.08594510	0.90447119		41.00000000	0.83756098	7.61003304	0.896639
42	0.10936722	9.08839990	0.99397303		42.00000000	0.81761905	7.43084887	0.918007
43	0.11953586	9.08589650	1.08609045		43.00000000	0.79860465	7.25603920	0.939484
44	0.12935244	9.09441950	1.17638535		44.00000000	0.78045455	7.09778104	0.960862
45	0.13946077	9.08767410	1.26737403		45.00000000	0.76311111	6.93490508	0.982209
46	0.14928553	9.08655740	1.35649154		46.00000000	0.74652174	6.78331263	1.003597
47	0.15943332	9.09573940	1.45016393		47.00000000	0.73063830	6.64569555	1.025076
48	0.16962205	9.07206060	1.53882152		48.00000000	0.71541667	6.49030335	1.046475
49	0.17941704	9.08350370	1.62973535		49.00000000	0.70081633	6.36586770	1.067832
50	0.18956184	9.07978730	1.72118119		50.00000000	0.68680000	6.23599792	1.089205
51	0.19934121	9.10804180	1.81560807		51.00000000	0.67333333	6.13274815	1.110693
52	0.20949942	9.09173110	1.90471239		52.00000000	0.66038462	6.00403935	1.132066
53	0.21933162	9.07901480	1.99131502		53.00000000	0.64792453	5.88251638	1.153416
54	0.22944890	9.09025570	2.08574917		54.00000000	0.63592593	5.78072927	1.174800
55	0.23928185	9.08844470	2.17469986		55.00000000	0.62436364	5.67449438	1.196277
56	0.24944155	9.08155630	2.26531748		56.00000000	0.61321429	5.56894006	1.217664
57	0.25959527	9.08488560	2.35839333		57.00000000	0.60245614	5.47324511	1.239036
58	0.26940069	9.08447840	2.44736475		58.00000000	0.59206897	5.37863773	1.260405
59	0.27955148	9.09351830	2.54210650		59.00000000	0.58203390	5.29273591	1.281905
60	0.28933677	9.07858090	2.62676727		60.00000000	0.57233333	5.19597447	1.303295
61	0.29948828	9.08584020	2.72110265		61.00000000	0.56295082	5.11488119	1.324674
62	0.30928105	9.08874700	2.81097722		62.00000000	0.55387097	5.03399310	1.346023
63	0.31948614	9.09164430	2.90465434		63.00000000	0.54507937	4.95566770	1.367497
64	0.32928857	9.08302500	2.99093631		64.00000000	0.53656250	4.87361060	1.388878
65	0.33945498	9.08769420	3.08486305		65.00000000	0.52830769	4.80109875	1.410274
66	0.34928420	9.09156040	3.17553840		66.00000000	0.52030303	4.73036643	1.431753
67	0.35944241	9.09193800	3.26802811		67.00000000	0.51253731	4.65995748	1.453124
68	0.36959764	9.07849030	3.35538859		68.00000000	0.50500000	4.58463760	1.474482
69	0.37940976	9.10214610	3.45344307		69.00000000	0.49768116	4.52996662	1.495859
70	0.38953671	9.08085350	3.53732580		70.00000000	0.49057143	4.45480727	1.517345
71	0.39937115	9.09616470	3.63274576		71.00000000	0.48366197	4.39946895	1.538740
72	0.40951222	9.08527090	3.72052946		72.00000000	0.47694444	4.33316948	1.560092
73	0.41935560	9.08300500	3.80900901		73.00000000	0.47041096	4.27274509	1.581470
74	0.42948553	9.08473490	3.90176218		74.00000000	0.46405405	4.21580806	1.602955
75	0.43930358	9.08456330	3.99088118		75.00000000	0.45786667	4.15951872	1.624321
76	0.44946551	9.08444500	4.08314470		76.00000000	0.45184211	4.10473475	1.645685
77	0.45960140	9.06250860	4.16514164		77.00000000	0.44597403	4.04164345	1.667065
78	0.46947825	9.07509610	4.26056024		78.00000000	0.44025641	3.99536923	1.688553
79	0.47960892	9.06649880	4.34837370		79.00000000	0.43468354	3.94105783	1.709938
80	0.48941508	9.05767060	4.43296058		80.00000000	0.42925000	3.88800511	1.731277
81	0.49957553	9.04901980	4.52066886		81.00000000	0.42395062	3.83633753	1.752655
82	0.50934446	9.03245350	4.60063015		82.00000000	0.41878049	3.78261528	1.774136
83	0.51952499	9.01791000	4.68502960		83.00000000	0.41373494	3.73102445	1.795520
84	0.52930361	8.99012090	4.75850345		84.00000000	0.40880952	3.67524704	1.816874
85	0.53942907	8.92327020	4.81347135		85.00000000	0.40400000	3.60500116	1.838256
86	0.54956794	8.88849260	4.88483057		86.00000000	0.39930233	3.54919577	1.859740
87	0.55938971	8.77547450	4.90891014		87.00000000	0.39471264	3.46379074	1.881116
88	0.56950033	8.65617850	4.92969651		88.00000000	0.39022727	3.37787693	1.902503
89	0.57933027	8.47525020	4.90996899		89.00000000	0.38584270	3.27011339	1.923876
90	0.58946538	8.21179290	4.84056762		90.00000000	0.38155556	3.13325520	1.945350
91	0.59926784	7.91118570	4.74091917		91.00000000	0.37736264	2.98538590	1.966721
92	0.60938215	7.41767690	4.52019990		92.00000000	0.37326087	2.76872853	1.988196
93	0.61916673	6.82753420	4.22738202		93.00000000	0.36924731	2.52104865	2.009575
94	0.62928098	6.01488260	3.78505122		94.00000000	0.36531915	2.19735179	2.031076
95	0.63939899	4.97469040	3.18081202		95.00000000	0.36147368	1.79821967	2.052523
96	0.64920592	3.71860580	2.41414090		96.00000000	0.35770833	1.33017628	2.073930
97	0.65927184	2.10432740	1.38732380		97.00000000	0.35402062	0.74497529	2.095412
98	0.66901326	0.20577256	0.13766457		98.00000000	0.35040816	0.07210438	2.116785
99	0.67912304	-2.09210680	-1.42079793		99.00000000	0.34686869	-0.72568634	2.138147
100	0.68886667	-4.72290800	-3.25345391		100.00000000	0.34340000	-1.62184661	2.159537
101	0.69904351	-7.86022520	-5.49463941		101.00000000	0.34000000	-2.67247657	2.181014
03:15 03/04/2018
Test Lot:	JK-PERC
Recipe:	Recipe_YJX-LID
Cell Name:	1-20-2-3h
Test Order:	4
Test Condition:	Light
1	-0.29981107	9.08704090	-2.72439546		1.00000000	34.34000000	312.04898451	0.000000
2	-0.28998545	9.09288020	-2.63680296		2.00000000	17.17000000	156.12475303	0.061854
3	-0.27987549	9.08587070	-2.54291251		3.00000000	11.44666667	104.00293328	0.083270
4	-0.27003050	9.09114650	-2.45488683		4.00000000	8.58500000	78.04749270	0.104780
5	-0.25988334	9.09416870	-2.36342294		5.00000000	6.86800000	62.45875063	0.126153
6	-0.24971160	9.08808710	-2.26940077		6.00000000	5.72333333	52.01415184	0.147504
7	-0.23985769	9.08998110	-2.18030187		7.00000000	4.90571429	44.59285014	0.168888
8	-0.22975220	9.09324070	-2.08919206		8.00000000	4.29250000	39.03273570	0.190382
9	-0.21990201	9.09275340	-1.99951475		9.00000000	3.81555556	34.69390575	0.211757
10	-0.20971093	9.09237580	-1.90677058		10.00000000	3.43400000	31.22321850	0.233110
11	-0.19992623	9.08694270	-1.81671820		11.00000000	3.12181818	28.36778294	0.254475
12	-0.18979618	9.08374120	-1.72405938		12.00000000	2.86166667	25.99463940	0.275966
13	-0.17996684	9.07811070	-1.63375890		13.00000000	2.64153846	23.98017857	0.297348
14	-0.16984721	9.08816240	-1.54359903		14.00000000	2.45285714	22.29196406	0.318690
15	-0.16000445	9.08940410	-1.45434510		15.00000000	2.28933333	20.80867579	0.340061
16	-0.14987515	9.08958240	-1.36230253		16.00000000	2.14625000	19.50851623	0.361542
17	-0.13974585	9.09520150	-1.27101666		17.00000000	2.02000000	18.37230703	0.382927
18	-0.12989715	9.08780190	-1.18047957		18.00000000	1.90777778	17.33750651	0.404289
19	-0.11977007	9.10233880	-1.09018776		19.00000000	1.80736842	16.45127970	0.425658
20	-0.10994817	9.09804340	-1.00031322		20.00000000	1.71700000	15.62134052	0.447142
21	-0.09977867	9.08905700	-0.90689399		21.00000000	1.63523810	14.86277226	0.468515
22	-0.08997016	9.08528710	-0.81740471		22.00000000	1.56090909	14.18130723	0.489909
23	-0.07980959	9.08808900	-0.72531667		23.00000000	1.49304348	13.56891201	0.511270
24	-0.07002490	9.08924870	-0.63647373		24.00000000	1.43083333	13.00520001	0.532750
25	-0.05987326	9.08562370	-0.54398592		25.00000000	1.37360000	12.48001271	0.554128
26	-0.04972088	9.09761140	-0.45234127		26.00000000	1.32076923	12.01584521	0.575508
27	-0.03989153	9.09070870	-0.36264232		27.00000000	1.27185185	11.56203469	0.596859
28	-0.02975850	9.08620450	-0.27039185		28.00000000	1.22642857	11.14358080	0.618359
29	-0.01993511	9.07803440	-0.18097161		29.00000000	1.18413793	10.74964487	0.639758
30	-0.00979687	9.09225080	-0.08907562		30.00000000	1.14466667	10.40759642	0.661167
31	-0.00062251	9.09990220	-0.00566482		31.00000000	1.10774194	10.08034328	0.682780
32	0.00953189	9.09001160	0.08664498		32.00000000	1.07312500	9.75471870	0.704228
33	0.01935649	9.09176160	0.17598462		33.00000000	1.04060606	9.46094222	0.725595
34	0.02948998	9.08840080	0.26801671		34.00000000	1.01000000	9.17928481	0.746979
35	0.03930937	9.08800220	0.35724365		35.00000000	0.98114286	8.91662844	0.768328
36	0.04945030	9.08511350	0.44926156		36.00000000	0.95388889	8.66618882	0.789833
37	0.05930691	9.08405490	0.53874718		37.00000000	0.92810811	8.43098501	0.811205
38	0.06945304	9.08802030	0.63119062		38.00000000	0.90368421	8.21270045	0.832613
39	0.07956643	9.09422680	0.72359513		39.00000000	0.88051282	8.00758329	0.853975
40	0.08940294	9.09338090	0.81297495		40.00000000	0.85850000	7.80666750	0.875448
41	0.09954014	9.08387850	0.90421057		41.00000000	0.83756098	7.60830214	0.896837
42	0.10936698	9.07885840	0.99292733		42.00000000	0.81761905	7.42304756	0.918212
43	0.11953991	9.10769080	1.08873254		43.00000000	0.79860465	7.27344423	0.939558
44	0.12937270	9.08172420	1.17492718		44.00000000	0.78045455	7.08787293	0.961031
45	0.13950990	9.08800700	1.26786695		45.00000000	0.76311111	6.93515912	0.982406
46	0.14930771	9.09703350	1.35825724		46.00000000	0.74652174	6.79113327	1.003794
47	0.15946129	9.08727260	1.44906821		47.00000000	0.73063830	6.63950938	1.025271
48	0.16962008	9.08174900	1.54044699		48.00000000	0.71541667	6.49723460	1.046646
49	0.17942162	9.08784480	1.63055584		49.00000000	0.70081633	6.36891001	1.068014
50	0.18956478	9.09199240	1.72352154		50.00000000	0.68680000	6.24438038	1.089391
51	0.19933133	9.09117410	1.81215582		51.00000000	0.67333333	6.12139056	1.110868
52	0.20947894	9.08631320	1.90339126		52.00000000	0.66038462	6.00046145	1.132254
53	0.21933779	9.08546070	1.99278487		53.00000000	0.64792453	5.88669284	1.153610
54	0.22947499	9.08458610	2.08468530		54.00000000	0.63592593	5.77712383	1.174983
55	0.23928396	9.08335970	2.17350228		55.00000000	0.62436364	5.67131949	1.196470
56	0.24946062	9.08880330	2.26729851		56.00000000	0.61321429	5.57338402	1.217843
57	0.25959411	9.09568500	2.36118625		57.00000000	0.60245614	5.47975128	1.239186
58	0.26942241	9.09000110	2.44905000		58.00000000	0.59206897	5.38190755	1.260563
59	0.27955368	9.08983610	2.54109713		59.00000000	0.58203390	5.29059274	1.282051
60	0.28937531	9.08634190	2.62936300		60.00000000	0.57233333	5.20041635	1.303429
61	0.29948497	9.08546730	2.72096090		61.00000000	0.56295082	5.11467126	1.324773
62	0.30935496	9.08322430	2.80994049		62.00000000	0.55387097	5.03093423	1.346133
63	0.31949961	9.09569360	2.90607056		63.00000000	0.54507937	4.95787489	1.367608
64	0.32931158	9.08775140	2.99270177		64.00000000	0.53656250	4.87614661	1.388985
65	0.33945101	9.09707740	3.08801211		65.00000000	0.52830769	4.80605597	1.410340
66	0.34928676	9.08096120	3.17185952		66.00000000	0.52030303	4.72485163	1.431722
67	0.35942101	9.10019590	3.27080160		67.00000000	0.51253731	4.66418996	1.453188
68	0.36959097	9.08018490	3.35595434		68.00000000	0.50500000	4.58549337	1.474563
69	0.37940514	9.09938340	3.45235283		69.00000000	0.49768116	4.52859168	1.495935
70	0.38954756	9.08177380	3.53778282		70.00000000	0.49057143	4.45525875	1.517302
71	0.39935133	9.09477900	3.63201209		71.00000000	0.48366197	4.39879874	1.538775
72	0.40951756	9.08044530	3.71860180		72.00000000	0.47694444	4.33086794	1.560161
73	0.41931462	9.09339900	3.81299515		73.00000000	0.47041096	4.27763454	1.581547
74	0.42950168	9.07878020	3.89935135		74.00000000	0.46405405	4.21304476	1.602906
75	0.43931365	9.09650140	3.99621723		75.00000000	0.45786667	4.16498477	1.624381
76	0.44949624	9.08645340	4.08432664		76.00000000	0.45184211	4.10564223	1.645765
77	0.45961633	9.07337000	4.17026902		77.00000000	0.44597403	4.04648735	1.667153
78	0.46947369	9.07199000	4.25906062		78.00000000	0.44025641	3.99400175	1.688640
79	0.47960493	9.07031440	4.35016750		79.00000000	0.43468354	3.94271641	1.710014
80	0.48941541	9.05935190	4.43378642		80.00000000	0.42925000	3.88872680	1.731369
81	0.49957493	9.05831340	4.52530628		81.00000000	0.42395062	3.84027756	1.752733
82	0.50938243	9.03834920	4.60397628		82.00000000	0.41878049	3.78508429	1.774216
83	0.51953155	9.01790810	4.68508777		83.00000000	0.41373494	3.73102366	1.795611
84	0.52931964	8.98330690	4.75504077		84.00000000	0.40880952	3.67246142	1.816965
85	0.53944421	8.94210340	4.82376590		85.00000000	0.40400000	3.61260977	1.838328
86	0.54958516	8.88160710	4.88119946		86.00000000	0.39930233	3.54644637	1.859818
87	0.55941790	8.79165360	4.91820839		87.00000000	0.39471264	3.47017683	1.881198
88	0.56954992	8.67448230	4.94055070		88.00000000	0.39022727	3.38501957	1.902554
89	0.57936186	8.47324850	4.90907701		89.00000000	0.38584270	3.26934105	1.923940
90	0.58948046	8.25156690	4.86413745		90.00000000	0.38155556	3.14843119	1.945413
91	0.59928942	7.92005680	4.74640625		91.00000000	0.37736264	2.98873352	1.966798
92	0.60937899	7.45708320	4.54418983		92.00000000	0.37326087	2.78343736	1.988263
93	0.61918873	6.87228390	4.25524074		93.00000000	0.36924731	2.53757236	2.009661
94	0.62930065	6.05904390	3.81296026		94.00000000	0.36531915	2.21348476	2.031296
95	0.63940138	5.02592130	3.21358101		95.00000000	0.36147368	1.81673829	2.052677
96	0.64917910	3.74110050	2.42864426		96.00000000	0.35770833	1.33822282	2.074027
97	0.65930957	2.12082120	1.39827771		97.00000000	0.35402062	0.75081443	2.095405
98	0.66900843	0.20448248	0.13680050		98.00000000	0.35040816	0.07165233	2.116884
99	0.67913741	-2.15260670	-1.46191574		99.00000000	0.34686869	-0.74667186	2.138251
100	0.68882507	-4.81106470	-3.31398198		100.00000000	0.34340000	-1.65211962	2.159624
101	0.69907242	-8.04951950	-5.62719708		101.00000000	0.34000000	-2.73683663	2.180994
03:44 03/04/2018
Test Lot:	JK-PERC
Recipe:	Recipe_YJX-LID
Cell Name:	1-20-2-3h
Test Order:	5
Test Condition:	Light
1	-0.29980648	9.06523990	-2.71781766		1.00000000	34.34000000	311.30033817	0.000000
2	-0.29001206	9.06243990	-2.62821686		2.00000000	17.17000000	155.60209308	0.061843
3	-0.27986336	9.05509380	-2.53418898		3.00000000	11.44666667	103.65064036	0.083259
4	-0.27004886	9.05990790	-2.44661780		4.00000000	8.58500000	77.77930932	0.104763
5	-0.25988600	9.05971430	-2.35449291		5.00000000	6.86800000	62.22211781	0.126152
6	-0.24973135	9.04707150	-2.25933738		6.00000000	5.72333333	51.77940589	0.147533
7	-0.23994215	9.05569270	-2.17284238		7.00000000	4.90571429	44.42464105	0.168937
8	-0.22978897	9.05470660	-2.08067170		8.00000000	4.29250000	38.86732808	0.190412
9	-0.21996702	9.05407710	-1.99159836		9.00000000	3.81555556	34.54633418	0.211804
10	-0.20981610	9.06554510	-1.90209732		10.00000000	3.43400000	31.13108187	0.233190
11	-0.20000158	9.04467870	-1.80895003		11.00000000	3.12181818	28.23584241	0.254657
12	-0.18984766	9.06229310	-1.72045514		12.00000000	2.86166667	25.93326209	0.276097
13	-0.18007782	9.05638500	-1.63085407		13.00000000	2.64153846	23.92278930	0.297461
14	-0.16993804	9.05468460	-1.53873535		14.00000000	2.45285714	22.20984780	0.318846
15	-0.16009749	9.05106540	-1.44905285		15.00000000	2.28933333	20.72090572	0.340190
16	-0.14997633	9.05245020	-1.35765326		16.00000000	2.14625000	19.42882124	0.361683
17	-0.13981274	9.04481220	-1.26457998		17.00000000	2.02000000	18.27052064	0.383050
18	-0.12998110	9.04516600	-1.17570063		18.00000000	1.90777778	17.25616669	0.404444
19	-0.11984207	9.05985830	-1.08575217		19.00000000	1.80736842	16.37450179	0.425800
20	-0.11002757	9.05167770	-0.99593410		20.00000000	1.71700000	15.54173061	0.447267
21	-0.09985951	9.06687550	-0.90541377		21.00000000	1.63523810	14.82650022	0.468651
22	-0.09004575	9.04292490	-0.81427695		22.00000000	1.56090909	14.11518368	0.490029
23	-0.07990895	9.05433270	-0.72352224		23.00000000	1.49304348	13.51851239	0.511385
24	-0.07007881	9.05006030	-0.63421748		24.00000000	1.43083333	12.94912795	0.532861
25	-0.05990704	9.04885390	-0.54209003		25.00000000	1.37360000	12.42950572	0.554234
26	-0.04977471	9.05042270	-0.45048217		26.00000000	1.32076923	11.95351983	0.575637
27	-0.03997137	9.06400010	-0.36230047		27.00000000	1.27185185	11.52806531	0.597120
28	-0.02978172	9.05303960	-0.26961512		28.00000000	1.22642857	11.10290642	0.618534
29	-0.01998880	9.05318450	-0.18096230		29.00000000	1.18413793	10.72021916	0.639912
30	-0.00985722	9.04432010	-0.08915182		30.00000000	1.14466667	10.35273174	0.661290
31	-0.00065081	9.05592630	-0.00589370		31.00000000	1.10774194	10.03162933	0.682970
32	0.00950141	9.05430130	0.08602860		32.00000000	1.07312500	9.71639708	0.704345
33	0.01930000	9.04789260	0.17462436		33.00000000	1.04060606	9.41529188	0.725682
34	0.02945065	9.04011920	0.26623741		34.00000000	1.01000000	9.13052039	0.747055
35	0.03931028	9.05262850	0.35586140		35.00000000	0.98114286	8.88192179	0.768533
36	0.04945498	9.06150050	0.44813629		36.00000000	0.95388889	8.64366464	0.789908
37	0.05926102	9.04629420	0.53609259		37.00000000	0.92810811	8.39593900	0.811278
38	0.06938934	9.05439950	0.62827877		38.00000000	0.90368421	8.18231786	0.832654
39	0.07954594	9.05988500	0.72067704		39.00000000	0.88051282	7.97734489	0.854139
40	0.08935347	9.04293820	0.80801793		40.00000000	0.85850000	7.76336244	0.875523
41	0.09949593	9.05164430	0.90060179		41.00000000	0.83756098	7.58130403	0.896868
42	0.10931314	9.03958510	0.98814543		42.00000000	0.81761905	7.39093696	0.918239
43	0.11945634	9.05395030	1.08155177		43.00000000	0.79860465	7.23052682	0.939727
44	0.12930703	9.05208970	1.17049883		44.00000000	0.78045455	7.06474455	0.961115
45	0.13946141	9.04552650	1.26150188		45.00000000	0.76311111	6.90274178	0.982456
46	0.14925182	9.05583290	1.35159954		46.00000000	0.74652174	6.76037613	1.003893
47	0.15940395	9.04385090	1.44162556		47.00000000	0.73063830	6.60778383	1.025392
48	0.16953674	9.06248660	1.53642443		48.00000000	0.71541667	6.48345396	1.046783
49	0.17935617	9.04257110	1.62184092		49.00000000	0.70081633	6.33718146	1.068194
50	0.18949194	9.06275180	1.71731842		50.00000000	0.68680000	6.22429794	1.089551
51	0.19925928	9.03810690	1.80092667		51.00000000	0.67333333	6.08565865	1.111024
52	0.20942406	9.06101610	1.89759478		52.00000000	0.66038462	5.98375563	1.132399
53	0.21927179	9.05173780	1.98479075		53.00000000	0.64792453	5.86484294	1.153774
54	0.22941574	9.04492380	2.07504789		54.00000000	0.63592593	5.75190154	1.175143
55	0.23923667	9.05811120	2.16703236		55.00000000	0.62436364	5.65555525	1.196617
56	0.24938360	9.05186080	2.25738563		56.00000000	0.61321429	5.55073035	1.217990
57	0.25956401	9.05517860	2.35039847		57.00000000	0.60245614	5.45534795	1.239381
58	0.26938495	9.03783320	2.43465624		58.00000000	0.59206897	5.35102055	1.260865
59	0.27953485	9.05593780	2.53145021		59.00000000	0.58203390	5.27086278	1.282227
60	0.28934982	9.04290100	2.61656178		60.00000000	0.57233333	5.17555367	1.303582
61	0.29948705	9.05517200	2.71190675		61.00000000	0.56295082	5.09761650	1.324961
62	0.30931768	9.05160900	2.79982270		62.00000000	0.55387097	5.01342344	1.346417
63	0.31945789	9.04720500	2.89020102		63.00000000	0.54507937	4.93144476	1.367829
64	0.32926318	9.04097370	2.97685975		64.00000000	0.53656250	4.85104745	1.389179
65	0.33943841	9.03924850	3.06826814		65.00000000	0.52830769	4.77550452	1.410568
66	0.34922954	9.04174800	3.15764549		66.00000000	0.52030303	4.70444888	1.432046
67	0.35942188	9.05561730	3.25478699		67.00000000	0.51253731	4.64134176	1.453424
68	0.36955541	9.03387830	3.33851860		68.00000000	0.50500000	4.56210854	1.474791
69	0.37937561	9.04508400	3.43148426		69.00000000	0.49768116	4.50156789	1.496166
70	0.38953817	9.03286170	3.51864442		70.00000000	0.49057143	4.43126387	1.517636
71	0.39932930	9.04418470	3.61160795		71.00000000	0.48366197	4.37432821	1.539022
72	0.40949261	9.04203320	3.70264577		72.00000000	0.47694444	4.31254750	1.560381
73	0.41931057	9.02041240	3.78235427		73.00000000	0.47041096	4.24330085	1.581754
74	0.42943367	9.05203630	3.88724917		74.00000000	0.46405405	4.20063414	1.603240
75	0.43927470	9.03105640	3.96711459		75.00000000	0.45786667	4.13501969	1.624611
76	0.44943726	9.01624870	4.05223811		76.00000000	0.45184211	4.07392079	1.645969
77	0.45955887	9.01348690	4.14222785		77.00000000	0.44597403	4.01978104	1.667347
78	0.46939617	9.01348880	4.23089712		78.00000000	0.44025641	3.96824622	1.688821
79	0.47958627	8.99347310	4.31314622		79.00000000	0.43468354	3.90931476	1.710208
80	0.48937890	8.97527980	4.39231256		80.00000000	0.42925000	3.85263885	1.731556
81	0.49950722	8.95185950	4.47151845		81.00000000	0.42395062	3.79514636	1.752915
82	0.50935793	8.94211670	4.55473805		82.00000000	0.41878049	3.74478399	1.774385
83	0.51947361	8.91554640	4.63139107		83.00000000	0.41373494	3.68867305	1.795754
84	0.52927369	8.87810130	4.69894544		84.00000000	0.40880952	3.62945236	1.817139
85	0.53940421	8.81043820	4.75238746		85.00000000	0.40400000	3.55941703	1.838492
86	0.54952216	8.72927860	4.79693203		86.00000000	0.39930233	3.48562125	1.859968
87	0.55936909	8.61632730	4.81970716		87.00000000	0.39471264	3.40097333	1.881344
88	0.56947064	8.46656320	4.82145916		88.00000000	0.39022727	3.30388387	1.902734
89	0.57929456	8.26811030	4.78967132		89.00000000	0.38584270	3.19018997	1.924224
90	0.58943921	7.97519540	4.70089288		90.00000000	0.38155556	3.04298011	1.945620
91	0.59923786	7.61215690	4.56149261		91.00000000	0.37736264	2.87254360	1.966968
92	0.60933936	7.10186820	4.32744782		92.00000000	0.37326087	2.65084950	1.988455
93	0.61914468	6.44763090	3.99201637		93.00000000	0.36924731	2.38077038	2.009971
94	0.62925285	5.57790900	3.50991514		94.00000000	0.36531915	2.03771697	2.031355
95	0.63937229	4.48001100	2.86439489		95.00000000	0.36147368	1.61940608	2.052697
96	0.64913362	3.15046500	2.04507275		96.00000000	0.35770833	1.12694758	2.074080
97	0.65924561	1.47956750	0.97539838		97.00000000	0.35402062	0.52379740	2.095565
98	0.66896975	-0.47000894	-0.31442176		98.00000000	0.35040816	-0.16469497	2.116981
99	0.67908990	-2.82031700	-1.91524879		99.00000000	0.34686869	-0.97827965	2.138346
100	0.68879247	-5.49307680	-3.78358994		100.00000000	0.34340000	-1.88632257	2.159723
101	0.69907188	-8.67085270	-6.06154930		101.00000000	0.34000000	-2.94808992	2.181233
