# Supplementary material for: Study on the Electrical Injection Regeneration of Industrialized B-Doped Czochralski Silicon PERC Solar Cells
Source: Hindawi journal article supplement (doi:10.1155/2019/5357370), 2019-06-20
Supplement: f1 [file 5357370.f1.zip › section3.1/IVRawData_1-20-2-4h.csv]

04:16 03/04/2018
Test Lot:	JK-PERC
Recipe:	Recipe_YJX-LID
Cell Name:	1-20-2-4h
Test Order:	2
Test Condition:	Light
1	-0.29980153	9.10063360	-2.72838388		1.00000000	34.34000000	312.51575782	0.000000
2	-0.28998321	9.10383220	-2.63995848		2.00000000	17.17000000	156.31279887	0.061803
3	-0.27985528	9.08704760	-2.54305825		3.00000000	11.44666667	104.01640486	0.083226
4	-0.27004218	9.09206580	-2.45524127		4.00000000	8.58500000	78.05538489	0.104704
5	-0.25989264	9.10318470	-2.36585070		5.00000000	6.86800000	62.52067252	0.126153
6	-0.24972747	9.08719830	-2.26932304		6.00000000	5.72333333	52.00906494	0.147531
7	-0.23995456	9.10261630	-2.18421429		7.00000000	4.90571429	44.65483482	0.168892
8	-0.22981024	9.07736020	-2.08607033		8.00000000	4.29250000	38.96456866	0.190367
9	-0.21994132	9.11234000	-2.00418009		9.00000000	3.81555556	34.76863951	0.211737
10	-0.20981933	9.08611970	-1.90644355		10.00000000	3.43400000	31.20173505	0.233125
11	-0.20001963	9.10252570	-1.82068382		11.00000000	3.12181818	28.41643023	0.254481
12	-0.18986340	9.08141040	-1.72422746		12.00000000	2.86166667	25.98796943	0.275954
13	-0.18006146	9.09249780	-1.63720843		13.00000000	2.64153846	24.01818265	0.297327
14	-0.16992904	9.09283540	-1.54513679		14.00000000	2.45285714	22.30342626	0.318705
15	-0.16010255	9.08615300	-1.45471626		15.00000000	2.28933333	20.80123293	0.340190
16	-0.14996642	9.09405800	-1.36380332		16.00000000	2.14625000	19.51812198	0.361582
17	-0.13979529	9.09072400	-1.27084040		17.00000000	2.02000000	18.36326248	0.382937
18	-0.12998219	9.09128000	-1.18170448		18.00000000	1.90777778	17.34414196	0.404305
19	-0.11983787	9.10449500	-1.09106329		19.00000000	1.80736842	16.45517675	0.425785
20	-0.11005753	9.08560750	-0.99993952		20.00000000	1.71700000	15.59998808	0.447168
21	-0.09984621	9.10256100	-0.90885625		21.00000000	1.63523810	14.88485451	0.468504
22	-0.09002642	9.08584790	-0.81796632		22.00000000	1.56090909	14.18218259	0.489878
23	-0.07986944	9.10272310	-0.72702941		23.00000000	1.49304348	13.59076136	0.511357
24	-0.07003699	9.09558680	-0.63702748		24.00000000	1.43083333	13.01426878	0.532727
25	-0.05988894	9.09015660	-0.54439984		25.00000000	1.37360000	12.48623911	0.554081
26	-0.04976918	9.08619500	-0.45221249		26.00000000	1.32076923	12.00076678	0.575459
27	-0.03992556	9.09508130	-0.36312625		27.00000000	1.27185185	11.56759599	0.596930
28	-0.02977306	9.09568020	-0.27080619		28.00000000	1.22642857	11.15520207	0.618310
29	-0.01995921	9.10307310	-0.18169016		29.00000000	1.18413793	10.77929415	0.639648
30	-0.00982754	9.08310410	-0.08926459		30.00000000	1.14466667	10.39712649	0.661026
31	-0.00065232	9.09538170	-0.00593313		31.00000000	1.10774194	10.07533573	0.682623
32	0.00948360	9.08546070	0.08616291		32.00000000	1.07312500	9.74983501	0.704006
33	0.01931354	9.10799790	0.17590772		33.00000000	1.04060606	9.47783781	0.725367
34	0.02946353	9.07339860	0.26733435		34.00000000	1.01000000	9.16413259	0.746738
35	0.03929124	9.09052090	0.35717781		35.00000000	0.98114286	8.91909965	0.768212
36	0.04944718	9.09100630	0.44952462		36.00000000	0.95388889	8.67180990	0.789598
37	0.05922874	9.09312530	0.53857433		37.00000000	0.92810811	8.43940332	0.810974
38	0.06938691	9.08194260	0.63016797		38.00000000	0.90368421	8.20720813	0.832334
39	0.07951383	9.10839650	0.72424345		39.00000000	0.88051282	8.02005989	0.853830
40	0.08933484	9.08025070	0.81118273		40.00000000	0.85850000	7.79539523	0.875210
41	0.09949450	9.09965420	0.90536556		41.00000000	0.83756098	7.62151525	0.896588
42	0.10929094	9.09044550	0.99350333		42.00000000	0.81761905	7.43252139	0.917946
43	0.11941563	9.10026260	1.08671359		43.00000000	0.79860465	7.26751204	0.939419
44	0.12929320	9.08600810	1.17475906		44.00000000	0.78045455	7.09121632	0.960805
45	0.13943203	9.09864900	1.26864310		45.00000000	0.76311111	6.94328015	0.982190
46	0.14922623	9.09366610	1.35701351		46.00000000	0.74652174	6.78861943	1.003663
47	0.15938665	9.10476880	1.45117860		47.00000000	0.73063830	6.65229278	1.025047
48	0.16955152	9.08426950	1.54025170		48.00000000	0.71541667	6.49903780	1.046392
49	0.17935838	9.09503270	1.63127033		49.00000000	0.70081633	6.37394741	1.067763
50	0.18950391	9.08100700	1.72088633		50.00000000	0.68680000	6.23683561	1.089244
51	0.19930854	9.09753610	1.81321664		51.00000000	0.67333333	6.12567431	1.110627
52	0.20944141	9.09465600	1.90479758		52.00000000	0.66038462	6.00597090	1.131976
53	0.21925199	9.09209060	1.99345896		53.00000000	0.64792453	5.89098851	1.153351
54	0.22941390	9.09138300	2.08568963		54.00000000	0.63592593	5.78144615	1.174833
55	0.23920736	9.08814720	2.17395170		55.00000000	0.62436364	5.67430863	1.196223
56	0.24939753	9.10574820	2.27095111		56.00000000	0.61321429	5.58377488	1.217578
57	0.25955051	9.09801010	2.36139316		57.00000000	0.60245614	5.48115205	1.238951
58	0.26938120	9.08716300	2.44791087		58.00000000	0.59206897	5.38022720	1.260422
59	0.27951255	9.10184000	2.54407851		59.00000000	0.58203390	5.29757942	1.281799
60	0.28935367	9.08928870	2.63001904		60.00000000	0.57233333	5.20210290	1.303135
61	0.29949546	9.09393790	2.72359311		61.00000000	0.56295082	5.11943979	1.324522
62	0.30932912	9.09052750	2.81196487		62.00000000	0.55387097	5.03497926	1.346003
63	0.31945157	9.10228730	2.90773997		63.00000000	0.54507937	4.96146898	1.367377
64	0.32928225	9.08712290	2.99222827		64.00000000	0.53656250	4.87580938	1.388732
65	0.33944342	9.10205840	3.08963383		65.00000000	0.52830769	4.80868747	1.410114
66	0.34923688	9.09595390	3.17664256		66.00000000	0.52030303	4.73265238	1.431582
67	0.35939059	9.08705620	3.26580249		67.00000000	0.51253731	4.65745537	1.452966
68	0.36955175	9.09151840	3.35978653		68.00000000	0.50500000	4.59121679	1.474321
69	0.37938020	9.07322030	3.44220013		69.00000000	0.49768116	4.51557080	1.495676
70	0.38952571	9.09906010	3.54431785		70.00000000	0.49057143	4.46373891	1.517160
71	0.39935043	9.07810500	3.62534514		71.00000000	0.48366197	4.39073416	1.538534
72	0.40944535	9.09048750	3.72205784		72.00000000	0.47694444	4.33565751	1.559920
73	0.41927752	9.08846280	3.81058814		73.00000000	0.47041096	4.27531250	1.581263
74	0.42946696	9.08215140	3.90048395		74.00000000	0.46405405	4.21460918	1.602736
75	0.43927383	9.08734130	3.99183122		75.00000000	0.45786667	4.16079067	1.624134
76	0.44942158	9.08935260	4.08495121		76.00000000	0.45184211	4.10695221	1.645515
77	0.45955741	9.07991890	4.17274401		77.00000000	0.44597403	4.04940799	1.666996
78	0.46941045	9.06990240	4.25750697		78.00000000	0.44025641	3.99308267	1.688383
79	0.47958276	9.08935740	4.35909911		79.00000000	0.43468354	3.95099409	1.709729
80	0.48938665	9.05424880	4.43102849		80.00000000	0.42925000	3.88653630	1.731098
81	0.49949270	9.06189540	4.52635060		81.00000000	0.42395062	3.84179615	1.752586
82	0.50933826	9.03561690	4.60218539		82.00000000	0.41878049	3.78394005	1.773963
83	0.51948828	9.02842620	4.69016160		83.00000000	0.41373494	3.73537537	1.795302
84	0.52924901	8.98001580	4.75266447		84.00000000	0.40880952	3.67111598	1.816688
85	0.53939450	8.95624260	4.83094800		85.00000000	0.40400000	3.61832201	1.838171
86	0.54954153	8.88097760	4.88046602		86.00000000	0.39930233	3.54619501	1.859553
87	0.55936849	8.78656860	4.91492961		87.00000000	0.39471264	3.46816972	1.880907
88	0.56952292	8.66081810	4.93253441		88.00000000	0.39022727	3.37968743	1.902275
89	0.57932013	8.49491790	4.92127694		89.00000000	0.38584270	3.27770203	1.923748
90	0.58946043	8.24164580	4.85812408		90.00000000	0.38155556	3.14464574	1.945123
91	0.59924203	7.91119000	4.74071756		91.00000000	0.37736264	2.98538752	1.966459
92	0.60936743	7.44011550	4.53376406		92.00000000	0.37326087	2.77710398	1.987929
93	0.61915642	6.86050220	4.24772398		93.00000000	0.36924731	2.53322200	2.009432
94	0.62927961	6.03806830	3.79963326		94.00000000	0.36531915	2.20582197	2.030813
95	0.63939017	5.00654600	3.20113630		95.00000000	0.36147368	1.80973463	2.052180
96	0.64919031	3.73666260	2.42580515		96.00000000	0.35770833	1.33663535	2.073563
97	0.65927184	2.11753150	1.39602889		97.00000000	0.35402062	0.74964981	2.095050
98	0.66901249	0.23481989	0.15709744		98.00000000	0.35040816	0.08228281	2.116489
99	0.67910516	-2.08789010	-1.41789694		99.00000000	0.34686869	-0.72422370	2.137869
100	0.68884873	-4.69353490	-3.23313556		100.00000000	0.34340000	-1.61175988	2.159233
101	0.69901735	-7.85463050	-5.49052300		101.00000000	0.34000000	-2.67057437	2.180742
04:16 03/04/2018
Test Lot:	JK-PERC
Recipe:	Recipe_YJX-LID
Cell Name:	1-20-2-4h
Test Order:	3
Test Condition:	Light
1	-0.29985884	9.08961110	-2.72560024		1.00000000	34.34000000	312.13724517	0.000000
2	-0.28997874	9.09326080	-2.63685231		2.00000000	17.17000000	156.13128794	0.021600
3	-0.27988282	9.09460930	-2.54542490		3.00000000	11.44666667	104.10296112	0.042989
4	-0.27010691	9.09472270	-2.45654745		4.00000000	8.58500000	78.07819438	0.064352
5	-0.25994846	9.09227090	-2.36352182		5.00000000	6.86800000	62.44571654	0.085727
6	-0.24976395	9.08682250	-2.26956068		6.00000000	5.72333333	52.00691411	0.107205
7	-0.23996425	9.09353260	-2.18212273		7.00000000	4.90571429	44.61027278	0.128590
8	-0.22982290	9.09873100	-2.09109674		8.00000000	4.29250000	39.05630282	0.149935
9	-0.21996811	9.09171680	-1.99988776		9.00000000	3.81555556	34.68995055	0.171299
10	-0.20983942	9.08990480	-1.90742035		10.00000000	3.43400000	31.21473308	0.192816
11	-0.19997869	9.10358520	-1.82052304		11.00000000	3.12181818	28.41973780	0.214192
12	-0.18983808	9.09177680	-1.72596545		12.00000000	2.86166667	26.01763461	0.235590
13	-0.18008082	9.10020920	-1.63877313		13.00000000	2.64153846	24.03855261	0.256937
14	-0.16992310	9.08826920	-1.54430688		14.00000000	2.45285714	22.29222602	0.278409
15	-0.16008766	9.10072330	-1.45691350		15.00000000	2.28933333	20.83458921	0.299787
16	-0.14995302	9.08841610	-1.36283544		16.00000000	2.14625000	19.50601305	0.321172
17	-0.13976032	9.08928200	-1.27032096		17.00000000	2.02000000	18.36034964	0.342605
18	-0.12996434	9.09602740	-1.18215920		18.00000000	1.90777778	17.35319894	0.364069
19	-0.11981256	9.09324260	-1.08948467		19.00000000	1.80736842	16.43483952	0.385440
20	-0.11001509	9.09164520	-1.00021816		20.00000000	1.71700000	15.61035481	0.406830
21	-0.09984472	9.09390160	-0.90797810		21.00000000	1.63523810	14.87069433	0.428203
22	-0.09000631	9.09179210	-0.81831869		22.00000000	1.56090909	14.19146094	0.449698
23	-0.07989325	9.09785180	-0.72685698		23.00000000	1.49304348	13.58348830	0.471078
24	-0.07008611	9.08649730	-0.63683729		24.00000000	1.43083333	13.00126322	0.492459
25	-0.05989787	9.10101220	-0.54513128		25.00000000	1.37360000	12.50115036	0.513816
26	-0.04976248	9.09523960	-0.45260172		26.00000000	1.32076923	12.01271261	0.535293
27	-0.03994343	9.09090900	-0.36312206		27.00000000	1.27185185	11.56228945	0.556672
28	-0.02983856	9.09119130	-0.27126801		28.00000000	1.22642857	11.14969676	0.578049
29	-0.01999345	9.09957700	-0.18193193		29.00000000	1.18413793	10.77515428	0.599406
30	-0.00985583	9.09137820	-0.08960305		30.00000000	1.14466667	10.40659758	0.620887
31	-0.00066870	9.08799080	-0.00607712		31.00000000	1.10774194	10.06714852	0.642381
32	0.00946425	9.09645840	0.08609117		32.00000000	1.07312500	9.76163692	0.663773
33	0.01927112	9.09417340	0.17525490		33.00000000	1.04060606	9.46345196	0.685251
34	0.02944492	9.08239360	0.26743039		34.00000000	1.01000000	9.17321754	0.706626
35	0.03924286	9.09411810	0.35687917		35.00000000	0.98114286	8.92262902	0.727983
36	0.04941666	9.08444310	0.44892285		36.00000000	0.95388889	8.66554933	0.749364
37	0.05922204	9.08553220	0.53806374		37.00000000	0.92810811	8.43235610	0.770831
38	0.06936012	9.07282260	0.62929208		38.00000000	0.90368421	8.19896653	0.792212
39	0.07951308	9.10204220	0.72373141		39.00000000	0.88051282	8.01446485	0.813563
40	0.08935493	9.09106450	0.81233145		40.00000000	0.85850000	7.80467887	0.834932
41	0.09952650	9.09815500	0.90550754		41.00000000	0.83756098	7.62025958	0.856422
42	0.10931848	9.08596610	0.99326400		42.00000000	0.81761905	7.42885895	0.877801
43	0.11950643	9.09366990	1.08675203		43.00000000	0.79860465	7.26224708	0.899158
44	0.12930511	9.07671930	1.17366619		44.00000000	0.78045455	7.08396684	0.920535
45	0.13947594	9.10623740	1.27010102		45.00000000	0.76311111	6.94907094	0.942010
46	0.14926717	9.08940890	1.35675034		46.00000000	0.74652174	6.78544134	0.963403
47	0.15943725	9.09961890	1.45081821		47.00000000	0.73063830	6.64853006	0.984744
48	0.16957459	9.08175280	1.54003451		48.00000000	0.71541667	6.49723732	1.006117
49	0.17941718	9.10209850	1.63307284		49.00000000	0.70081633	6.37889923	1.027606
50	0.18953443	9.09116940	1.72308961		50.00000000	0.68680000	6.24381514	1.048977
51	0.19932120	9.08132360	1.81010032		51.00000000	0.67333333	6.11475789	1.070318
52	0.20943694	9.09420680	1.90466284		52.00000000	0.66038462	6.00567426	1.091698
53	0.21930559	9.08572770	1.99255087		53.00000000	0.64792453	5.88686583	1.113174
54	0.22943547	9.08841420	2.08520458		54.00000000	0.63592593	5.77955822	1.134572
55	0.23926094	9.09732440	2.17663439		55.00000000	0.62436364	5.68003854	1.155931
56	0.24942210	9.08934210	2.26708279		56.00000000	0.61321429	5.57371442	1.177299
57	0.25956985	9.08648010	2.35857628		57.00000000	0.60245614	5.47420573	1.198770
58	0.26937672	9.08303070	2.44675702		58.00000000	0.59206897	5.37778059	1.220146
59	0.27952224	9.09016040	2.54090200		59.00000000	0.58203390	5.29078149	1.241523
60	0.28930232	9.09466080	2.63110647		60.00000000	0.57233333	5.20517753	1.262876
61	0.29947686	9.08184620	2.71980278		61.00000000	0.56295082	5.11263276	1.284360
62	0.30930755	9.10298160	2.81562094		62.00000000	0.55387097	5.04187723	1.305733
63	0.31943372	9.06733890	2.89641380		63.00000000	0.54507937	4.94241933	1.327121
64	0.32924432	9.10055830	2.99630713		64.00000000	0.53656250	4.88301831	1.348607
65	0.33937642	9.07663630	3.08039633		65.00000000	0.52830769	4.79525678	1.369979
66	0.34923166	9.10372260	3.17930816		66.00000000	0.52030303	4.73669446	1.391328
67	0.35934371	9.08574580	3.26490560		67.00000000	0.51253731	4.65678374	1.412700
68	0.36954355	9.08664040	3.35790935		68.00000000	0.50500000	4.58875340	1.434232
69	0.37934595	9.10281940	3.45311767		69.00000000	0.49768116	4.53030171	1.455613
70	0.38949668	9.08806710	3.53977196		70.00000000	0.49057143	4.45834606	1.476955
71	0.39930803	9.09452920	3.63151854		71.00000000	0.48366197	4.39867793	1.498332
72	0.40944758	9.07087230	3.71404671		72.00000000	0.47694444	4.32630215	1.519813
73	0.41927901	9.10677620	3.81828011		73.00000000	0.47041096	4.28392732	1.541182
74	0.42946175	9.08941750	3.90355715		74.00000000	0.46405405	4.21798104	1.562540
75	0.43927681	9.09073070	3.99334718		75.00000000	0.45786667	4.16234256	1.583901
76	0.44942829	9.08114340	4.08132275		76.00000000	0.45184211	4.10324295	1.605379
77	0.45959166	9.07733730	4.17186852		77.00000000	0.44597403	4.04825666	1.626769
78	0.46943203	9.08049960	4.26267736		78.00000000	0.44025641	3.99774816	1.648107
79	0.47957605	9.06289010	4.34634504		79.00000000	0.43468354	3.93948919	1.669470
80	0.48940599	9.06172560	4.43486279		80.00000000	0.42925000	3.88974571	1.690961
81	0.49951729	9.05213170	4.52169630		81.00000000	0.42395062	3.83765682	1.712346
82	0.50933087	9.04515930	4.60697886		82.00000000	0.41878049	3.78793622	1.733702
83	0.51949197	9.01371100	4.68255048		83.00000000	0.41373494	3.72928718	1.755079
84	0.52926236	8.99437430	4.76038377		84.00000000	0.40880952	3.67698587	1.776558
85	0.53940719	8.94371130	4.82430218		85.00000000	0.40400000	3.61325937	1.797947
86	0.54954970	8.88809680	4.88445093		86.00000000	0.39930233	3.54903772	1.819314
87	0.55939007	8.79867940	4.92189389		87.00000000	0.39471264	3.47295001	1.840672
88	0.56950659	8.67512130	4.94053875		88.00000000	0.39022727	3.38526893	1.862147
89	0.57929856	8.50452330	4.92665810		89.00000000	0.38584270	3.28140820	1.883523
90	0.58940834	8.25865940	4.86772273		90.00000000	0.38155556	3.15113738	1.904895
91	0.59924495	7.94144110	4.75886847		91.00000000	0.37736264	2.99680316	1.926259
92	0.60932875	7.47783280	4.55645851		92.00000000	0.37326087	2.79118237	1.947743
93	0.61915272	6.90047410	4.27244731		93.00000000	0.36924731	2.54798151	1.969109
94	0.62925357	6.08778050	3.83075761		94.00000000	0.36531915	2.22398279	1.990594
95	0.63938940	5.04917720	3.22839038		95.00000000	0.36147368	1.82514468	2.012102
96	0.64916354	3.77760480	2.45228330		96.00000000	0.35770833	1.35128072	2.033540
97	0.65926963	2.14385220	1.41337665		97.00000000	0.35402062	0.75896788	2.054896
98	0.66898793	0.21887662	0.14642582		98.00000000	0.35040816	0.07669615	2.076265
99	0.67908508	-2.14426400	-1.45613769		99.00000000	0.34686869	-0.74377804	2.097752
100	0.68879962	-4.84198900	-3.33516018		100.00000000	0.34340000	-1.66273902	2.119144
101	0.69904488	-8.11076070	-5.66978574		101.00000000	0.34000000	-2.75765864	2.140490
04:16 03/04/2018
Test Lot:	JK-PERC
Recipe:	Recipe_YJX-LID
Cell Name:	1-20-2-4h
Test Order:	4
Test Condition:	Light
1	-0.29977608	9.09692860	-2.72704160		1.00000000	34.34000000	312.38852812	0.000000
2	-0.29001656	9.09404850	-2.63742466		2.00000000	17.17000000	156.14481275	0.061816
3	-0.27984914	9.09929660	-2.54643033		3.00000000	11.44666667	104.15661508	0.083224
4	-0.27000400	9.08646390	-2.45338160		4.00000000	8.58500000	78.00729258	0.104725
5	-0.25983587	9.09230140	-2.36250604		5.00000000	6.86800000	62.44592602	0.126110
6	-0.24969895	9.09011170	-2.26979135		6.00000000	5.72333333	52.02573930	0.147501
7	-0.23992380	9.10558130	-2.18464567		7.00000000	4.90571429	44.66938026	0.168853
8	-0.22973852	9.08507160	-2.08719090		8.00000000	4.29250000	38.99766984	0.190321
9	-0.21991199	9.09795860	-2.00075018		9.00000000	3.81555556	34.71376648	0.211715
10	-0.20983018	9.09096240	-1.90755828		10.00000000	3.43400000	31.21836488	0.233093
11	-0.19995528	9.09463210	-1.81851971		11.00000000	3.12181818	28.39178785	0.254557
12	-0.18982954	9.09414010	-1.72633643		12.00000000	2.86166667	26.02439759	0.275944
13	-0.18003355	9.09028340	-1.63655599		13.00000000	2.64153846	24.01233323	0.297286
14	-0.16987804	9.09326740	-1.54474644		14.00000000	2.45285714	22.30448589	0.318656
15	-0.16007310	9.09752080	-1.45626836		15.00000000	2.28933333	20.82725762	0.340134
16	-0.14994216	9.09065720	-1.36307278		16.00000000	2.14625000	19.51082302	0.361518
17	-0.13977028	9.09473900	-1.27117422		17.00000000	2.02000000	18.37137278	0.382878
18	-0.12996535	9.09372810	-1.18186956		18.00000000	1.90777778	17.34881239	0.404254
19	-0.11978751	9.09227750	-1.08914128		19.00000000	1.80736842	16.43309523	0.425721
20	-0.10998927	9.07891370	-0.99858309		20.00000000	1.71700000	15.58849482	0.447107
21	-0.09981962	9.08791540	-0.90715229		21.00000000	1.63523810	14.86090547	0.468464
22	-0.09003479	9.09055230	-0.81846597		22.00000000	1.56090909	14.18952573	0.489836
23	-0.07984728	9.09058090	-0.72585812		23.00000000	1.49304348	13.57263253	0.511319
24	-0.07000215	9.09399130	-0.63659891		24.00000000	1.43083333	13.01198589	0.532698
25	-0.05986227	9.08180620	-0.54365754		25.00000000	1.37360000	12.47476900	0.554041
26	-0.04969262	9.10376930	-0.45239018		26.00000000	1.32076923	12.02397838	0.575416
27	-0.03989513	9.08025070	-0.36225780		27.00000000	1.27185185	11.54873367	0.596896
28	-0.02975154	9.09339430	-0.27054245		28.00000000	1.22642857	11.15239858	0.618275
29	-0.01991534	9.09591770	-0.18114829		29.00000000	1.18413793	10.77082117	0.639631
30	-0.00979407	9.10451320	-0.08917026		30.00000000	1.14466667	10.42163278	0.661007
31	-0.00058683	9.09271530	-0.00533587		31.00000000	1.10774194	10.07238205	0.682600
32	0.00953646	9.09597400	0.08674343		32.00000000	1.07312500	9.76111710	0.703969
33	0.01936047	9.09730720	0.17612814		33.00000000	1.04060606	9.46671301	0.725337
34	0.02949261	9.08584980	0.26796545		34.00000000	1.01000000	9.17670830	0.746705
35	0.03931811	9.09215740	0.35748642		35.00000000	0.98114286	8.92070529	0.768175
36	0.04946067	9.07911400	0.44905908		36.00000000	0.95388889	8.66046597	0.789553
37	0.05929659	9.09597780	0.53936043		37.00000000	0.92810811	8.44205075	0.810935
38	0.06943617	9.09678360	0.63164581		38.00000000	0.90368421	8.22061971	0.832266
39	0.07959214	9.09037880	0.72352269		39.00000000	0.88051282	8.00419508	0.853743
40	0.08937670	9.07817460	0.81137724		40.00000000	0.85850000	7.79361289	0.875135
41	0.09955201	9.08964250	0.90489214		41.00000000	0.83756098	7.61312984	0.896515
42	0.10933656	9.08764840	0.99361221		42.00000000	0.81761905	7.43023443	0.917997
43	0.11953272	9.09065720	1.08663098		43.00000000	0.79860465	7.25984112	0.939375
44	0.12932695	9.10354230	1.17733336		44.00000000	0.78045455	7.10490097	0.960737
45	0.13948515	9.08772370	1.26760250		45.00000000	0.76311111	6.93494293	0.982110
46	0.14929649	9.09144970	1.35732153		46.00000000	0.74652174	6.78696484	1.003587
47	0.15941972	9.10066990	1.45082625		47.00000000	0.73063830	6.64929797	1.024971
48	0.16959503	9.08759880	1.54121159		48.00000000	0.71541667	6.50141964	1.046331
49	0.17939596	9.09717370	1.63199621		49.00000000	0.70081633	6.37544785	1.067709
50	0.18954448	9.09373470	1.72366721		50.00000000	0.68680000	6.24557699	1.089177
51	0.19935137	9.09395980	1.81289334		51.00000000	0.67333333	6.12326627	1.110557
52	0.20946416	9.08612350	1.90321723		52.00000000	0.66038462	6.00033617	1.131900
53	0.21928741	9.08649350	1.99255363		53.00000000	0.64792453	5.88736201	1.153270
54	0.22943072	9.09093760	2.08574036		54.00000000	0.63592593	5.78116291	1.174753
55	0.23926292	9.08407210	2.17348162		55.00000000	0.62436364	5.67176429	1.196124
56	0.24941888	9.08625510	2.26628357		56.00000000	0.61321429	5.57182143	1.217482
57	0.25960982	9.09779640	2.36187729		57.00000000	0.60245614	5.48102330	1.238868
58	0.26943308	9.08464620	2.44770421		58.00000000	0.59206897	5.37873708	1.260338
59	0.27954885	9.08682440	2.54021131		59.00000000	0.58203390	5.28883983	1.281771
60	0.28939593	9.08138750	2.62811658		60.00000000	0.57233333	5.19758078	1.303115
61	0.29953477	9.09223460	2.72344040		61.00000000	0.56295082	5.11848092	1.324483
62	0.30934539	9.08806040	2.81134959		62.00000000	0.55387097	5.03361281	1.345963
63	0.31949985	9.08006860	2.90108056		63.00000000	0.54507937	4.94935803	1.367334
64	0.32932982	9.09941860	2.99670989		64.00000000	0.53656250	4.88240679	1.388690
65	0.33948207	9.09626480	3.08801880		65.00000000	0.52830769	4.80562667	1.410058
66	0.34928000	9.06994920	3.16795186		66.00000000	0.52030303	4.71912205	1.431525
67	0.35940471	9.09705350	3.26952388		67.00000000	0.51253731	4.66257936	1.452899
68	0.36956292	9.08186630	3.35632103		68.00000000	0.50500000	4.58634248	1.474289
69	0.37936607	9.08951090	3.44825203		69.00000000	0.49768116	4.52367832	1.495639
70	0.38956967	9.08682730	3.53995231		70.00000000	0.49057143	4.45773785	1.517115
71	0.39937881	9.09053420	3.63056673		71.00000000	0.48366197	4.39674570	1.538493
72	0.40953922	9.09482960	3.72468942		72.00000000	0.47694444	4.33772845	1.559879
73	0.41936547	9.08153720	3.80848312		73.00000000	0.47041096	4.27205462	1.581352
74	0.42949164	9.08638860	3.90252794		74.00000000	0.46405405	4.21657547	1.602739
75	0.43930599	9.08645530	3.99173424		75.00000000	0.45786667	4.16038500	1.624088
76	0.44948649	9.08122060	4.08188597		76.00000000	0.45184211	4.10327783	1.645460
77	0.45960003	9.07564160	4.17116515		77.00000000	0.44597403	4.04750042	1.666935
78	0.46947315	9.07599350	4.26093526		78.00000000	0.44025641	3.99576432	1.688299
79	0.47958523	9.06729220	4.34853942		79.00000000	0.43468354	3.94140271	1.709661
80	0.48939285	9.06091590	4.43434746		80.00000000	0.42925000	3.88939815	1.731031
81	0.49954361	9.04788970	4.51981548		81.00000000	0.42395062	3.83585842	1.752503
82	0.50936759	9.05197140	4.61078086		82.00000000	0.41878049	3.79078900	1.773897
83	0.51951164	9.01436810	4.68306916		83.00000000	0.41373494	3.72955904	1.795240
84	0.52931857	8.98659800	4.75677320		84.00000000	0.40880952	3.67380685	1.816605
85	0.53942168	8.94624610	4.82579910		85.00000000	0.40400000	3.61428342	1.838085
86	0.54956496	8.86656760	4.87275487		86.00000000	0.39930233	3.54044106	1.859463
87	0.55938601	8.81071760	4.92859216		87.00000000	0.39471264	3.47770164	1.880818
88	0.56953454	8.66488840	4.93495323		88.00000000	0.39022727	3.38127577	1.902193
89	0.57935482	8.50634380	4.92819128		89.00000000	0.38584270	3.28211063	1.923673
90	0.58949959	8.26285460	4.87094940		90.00000000	0.38155556	3.15273808	1.945056
91	0.59928417	7.93591980	4.75587111		91.00000000	0.37736264	2.99471963	1.966417
92	0.60939771	7.47699830	4.55646564		92.00000000	0.37326087	2.79087089	1.987900
93	0.61918151	6.89517310	4.26936369		93.00000000	0.36924731	2.54602413	2.009403
94	0.62930995	6.08210800	3.82753108		94.00000000	0.36531915	2.22191052	2.030838
95	0.63943017	5.03632310	3.22037694		95.00000000	0.36147368	1.82049827	2.052212
96	0.64922291	3.76785040	2.44617480		96.00000000	0.35770833	1.34779149	2.073588
97	0.65933496	2.12984280	1.40427982		97.00000000	0.35402062	0.75400827	2.095061
98	0.66901082	0.19805732	0.13250249		98.00000000	0.35040816	0.06940090	2.116431
99	0.67912066	-2.16063620	-1.46733268		99.00000000	0.34686869	-0.74945704	2.137827
100	0.68883598	-4.86103630	-3.34845670		100.00000000	0.34340000	-1.66927987	2.159171
101	0.69908428	-8.11398980	-5.67236272		101.00000000	0.34000000	-2.75875653	2.180654
