# Supplementary material for: Study on the Electrical Injection Regeneration of Industrialized B-Doped Czochralski Silicon PERC Solar Cells
Source: Hindawi journal article supplement (doi:10.1155/2019/5357370), 2019-06-20
Supplement: f1 [file 5357370.f1.zip › section3.1/IVRawData_1-20-2-6h.csv]

06:25 03/04/2018
Test Lot:	JK-PERC
Recipe:	Recipe_YJX-LID
Cell Name:	1-20-2-6h
Test Order:	2
Test Condition:	Light
1	-0.29977369	9.09247780	-2.72568562		1.00000000	34.34000000	312.23568765	0.000000
2	-0.28998536	9.08724780	-2.63516882		2.00000000	17.17000000	156.02804473	0.061815
3	-0.27982709	9.08593080	-2.54248958		3.00000000	11.44666667	104.00362122	0.083239
4	-0.27001792	9.09521100	-2.45586996		4.00000000	8.58500000	78.08238644	0.104676
5	-0.25987455	9.10027980	-2.36493112		5.00000000	6.86800000	62.50072167	0.126161
6	-0.24969696	9.09770110	-2.27166831		6.00000000	5.72333333	52.06917596	0.147540
7	-0.23989670	9.09119800	-2.18094840		7.00000000	4.90571429	44.59881990	0.168929
8	-0.22977343	9.10303120	-2.09163470		8.00000000	4.29250000	39.07476143	0.190287
9	-0.21993895	9.09171010	-1.99962117		9.00000000	3.81555556	34.68992498	0.211779
10	-0.20978367	9.09046840	-1.90703182		10.00000000	3.43400000	31.21666849	0.233209
11	-0.19996408	9.09295650	-1.81826468		11.00000000	3.12181818	28.38655693	0.254596
12	-0.18980806	9.09399800	-1.72611412		12.00000000	2.86166667	26.02399094	0.275956
13	-0.18004355	9.10321330	-1.63897484		13.00000000	2.64153846	24.04648806	0.297423
14	-0.16987561	9.08917050	-1.54402838		14.00000000	2.45285714	22.29443678	0.318791
15	-0.16004336	9.09013840	-1.45481629		15.00000000	2.28933333	20.81035684	0.340163
16	-0.14988361	9.08269690	-1.36134740		16.00000000	2.14625000	19.49373822	0.361515
17	-0.13973504	9.08760170	-1.26985639		17.00000000	2.02000000	18.35695543	0.382986
18	-0.12989981	9.10085200	-1.18219895		18.00000000	1.90777778	17.36240320	0.404354
19	-0.11976761	9.10662080	-1.09067821		19.00000000	1.80736842	16.45901886	0.425742
20	-0.10995471	9.09254460	-0.99976810		20.00000000	1.71700000	15.61189908	0.447218
21	-0.09978009	9.08472630	-0.90647481		21.00000000	1.63523810	14.85569053	0.468583
22	-0.08999101	9.09707740	-0.81865519		22.00000000	1.56090909	14.19971081	0.489938
23	-0.07985210	9.09063050	-0.72590597		23.00000000	1.49304348	13.57270658	0.511311
24	-0.07002284	9.08713250	-0.63630679		24.00000000	1.43083333	13.00217209	0.532792
25	-0.05986830	9.09130950	-0.54428126		25.00000000	1.37360000	12.48782273	0.554168
26	-0.04968474	9.09518620	-0.45189200		26.00000000	1.32076923	12.01264208	0.575510
27	-0.03989045	9.09425540	-0.36277397		27.00000000	1.27185185	11.56654557	0.596887
28	-0.02974932	9.10010910	-0.27072205		28.00000000	1.22642857	11.16063380	0.618349
29	-0.01994461	9.09387780	-0.18137385		29.00000000	1.18413793	10.76840564	0.639743
30	-0.00979827	9.10238360	-0.08918757		30.00000000	1.14466667	10.41919509	0.661095
31	-0.00057486	9.09373950	-0.00522760		31.00000000	1.10774194	10.07351659	0.682592
32	0.00955565	9.09185500	0.08687857		32.00000000	1.07312500	9.75669690	0.704072
33	0.01935933	9.09473420	0.17606799		33.00000000	1.04060606	9.46403553	0.725462
34	0.02946594	9.08667180	0.26774736		34.00000000	1.01000000	9.17753852	0.746819
35	0.03929568	9.09278010	0.35730695		35.00000000	0.98114286	8.92131625	0.768193
36	0.04944843	9.08890340	0.44943204		36.00000000	0.95388889	8.66980397	0.789683
37	0.05928784	9.09194370	0.53904172		37.00000000	0.92810811	8.43830667	0.811051
38	0.06942423	9.08919330	0.63101022		38.00000000	0.90368421	8.21376047	0.832411
39	0.07956358	9.08979130	0.72321634		39.00000000	0.88051282	8.00367778	0.853790
40	0.08938141	9.09293840	0.81273967		40.00000000	0.85850000	7.80628762	0.875262
41	0.09956319	9.09167670	0.90519633		41.00000000	0.83756098	7.61483361	0.896647
42	0.10936315	9.09729390	0.99490872		42.00000000	0.81761905	7.43812077	0.918005
43	0.11950921	9.08882620	1.08619844		43.00000000	0.79860465	7.25837888	0.939364
44	0.12930545	9.09634780	1.17620735		44.00000000	0.78045455	7.09928599	0.960843
45	0.13947012	9.10438630	1.26978985		45.00000000	0.76311111	6.94765835	0.982216
46	0.14928943	9.09137440	1.35724610		46.00000000	0.74652174	6.78690863	1.003605
47	0.15944442	9.09235100	1.44972463		47.00000000	0.73063830	6.64321986	1.024956
48	0.16961503	9.09302710	1.54231406		48.00000000	0.71541667	6.50530314	1.046439
49	0.17945594	9.09056380	1.63135567		49.00000000	0.70081633	6.37081553	1.067811
50	0.18957371	9.08761310	1.72277253		50.00000000	0.68680000	6.24137268	1.089203
51	0.19935134	9.09498790	1.81309803		51.00000000	0.67333333	6.12395852	1.110679
52	0.20953313	9.08378790	1.90335451		52.00000000	0.66038462	5.99879378	1.132067
53	0.21933457	9.09963510	1.99586455		53.00000000	0.64792453	5.89587678	1.153418
54	0.22948213	9.09581380	2.08732672		54.00000000	0.63592593	5.78426381	1.174792
55	0.23930441	9.08500670	2.17408217		55.00000000	0.62436364	5.67234782	1.196266
56	0.24946089	9.08883950	2.26730999		56.00000000	0.61321429	5.57340622	1.217640
57	0.25959876	9.10963340	2.36484953		57.00000000	0.60245614	5.48815458	1.238986
58	0.26944116	9.08061890	2.44669249		58.00000000	0.59206897	5.37635264	1.260364
59	0.27956489	9.09888740	2.54372946		59.00000000	0.58203390	5.29586090	1.281839
60	0.28937450	9.08664040	2.62944202		60.00000000	0.57233333	5.20058719	1.303206
61	0.29952800	9.11262700	2.72948694		61.00000000	0.56295082	5.12996084	1.324557
62	0.30937338	9.09008500	2.81223032		62.00000000	0.55387097	5.03473418	1.345914
63	0.31950232	9.09197040	2.90490564		63.00000000	0.54507937	4.95584545	1.367382
64	0.32933727	9.08867650	2.99323991		64.00000000	0.53656250	4.87664298	1.388786
65	0.33944014	9.09179210	3.08611918		65.00000000	0.52830769	4.80326370	1.410129
66	0.34927064	9.08814910	3.17422365		66.00000000	0.52030303	4.72859152	1.431545
67	0.35939881	9.08939740	3.26671861		67.00000000	0.51253731	4.65865532	1.453030
68	0.36960590	9.08293530	3.35710648		68.00000000	0.50500000	4.58688233	1.474411
69	0.37937462	9.10215850	3.45312792		69.00000000	0.49768116	4.52997280	1.495780
70	0.38955936	9.09131430	3.54160658		70.00000000	0.49057143	4.45993904	1.517152
71	0.39939061	9.07722470	3.62535831		71.00000000	0.48366197	4.39030840	1.538617
72	0.40952250	9.10327530	3.72799606		72.00000000	0.47694444	4.34175658	1.559993
73	0.41936043	9.07828620	3.80707400		73.00000000	0.47041096	4.27052532	1.581356
74	0.42946109	9.10264590	3.90923223		74.00000000	0.46405405	4.22411973	1.602719
75	0.43926552	9.08032700	3.98867456		75.00000000	0.45786667	4.15757906	1.624189
76	0.44945920	9.07945730	4.08084561		76.00000000	0.45184211	4.10248110	1.645575
77	0.45959112	9.08808230	4.17680192		77.00000000	0.44597403	4.05304865	1.666951
78	0.46946403	9.07367320	4.25976319		78.00000000	0.44025641	3.99474279	1.688311
79	0.47961307	9.07367040	4.35185092		79.00000000	0.43468354	3.94417521	1.709784
80	0.48939666	9.06163790	4.43473532		80.00000000	0.42925000	3.88970807	1.731166
81	0.49956354	9.06131550	4.52670285		81.00000000	0.42395062	3.84155030	1.752549
82	0.50936800	9.03347110	4.60136111		82.00000000	0.41878049	3.78304143	1.774023
83	0.51952296	9.02782730	4.69016356		83.00000000	0.41373494	3.73512758	1.795401
84	0.52931327	8.97464850	4.75040054		84.00000000	0.40880952	3.66892178	1.816747
85	0.53947049	8.94061760	4.82319936		85.00000000	0.40400000	3.61200951	1.838116
86	0.54956442	8.86220260	4.87035123		86.00000000	0.39930233	3.53869811	1.859602
87	0.55941278	8.77863980	4.91088330		87.00000000	0.39471264	3.46504012	1.880989
88	0.56951267	8.63895510	4.91999439		88.00000000	0.39022727	3.37115589	1.902330
89	0.57934242	8.45823290	4.90021312		89.00000000	0.38584270	3.26354739	1.923718
90	0.58948845	8.20523830	4.83689321		90.00000000	0.38155556	3.13075426	1.945192
91	0.59928548	7.84558630	4.70174595		91.00000000	0.37736264	2.96063114	1.966554
92	0.60936749	7.38671350	4.50122306		92.00000000	0.37326087	2.75717110	1.988015
93	0.61920691	6.76106550	4.18649848		93.00000000	0.36924731	2.49650526	2.009421
94	0.62928152	5.93899770	3.73730150		94.00000000	0.36531915	2.16962959	2.030912
95	0.63941640	4.88026710	3.12052282		95.00000000	0.36147368	1.76408813	2.052302
96	0.64919776	3.60411600	2.33978403		96.00000000	0.35770833	1.28922233	2.073652
97	0.65920538	1.96015580	1.29214525		97.00000000	0.35402062	0.69393557	2.095024
98	0.66899639	0.09335337	0.06245307		98.00000000	0.35040816	0.03271178	2.116502
99	0.67911863	-2.21640180	-1.50519975		99.00000000	0.34686869	-0.76880038	2.137892
100	0.68883896	-4.80640750	-3.31084074		100.00000000	0.34340000	-1.65052034	2.159252
101	0.69908774	-7.92277340	-5.53871375		101.00000000	0.34000000	-2.69374296	2.180626
06:25 03/04/2018
Test Lot:	JK-PERC
Recipe:	Recipe_YJX-LID
Cell Name:	1-20-2-6h
Test Order:	3
Test Condition:	Light
1	-0.29981908	9.10068510	-2.72855903		1.00000000	34.34000000	312.51752633	0.000000
2	-0.28995708	9.08146190	-2.63323417		2.00000000	17.17000000	155.92870082	0.021595
3	-0.27985463	9.10116770	-2.54700392		3.00000000	11.44666667	104.17803294	0.043041
4	-0.27006036	9.09373760	-2.45585805		4.00000000	8.58500000	78.06973730	0.064413
5	-0.25992218	9.09710410	-2.36453913		5.00000000	6.86800000	62.47891096	0.085802
6	-0.24974532	9.09238240	-2.27077995		6.00000000	5.72333333	52.03873527	0.107301
7	-0.23992722	9.10149960	-2.18369750		7.00000000	4.90571429	44.64935661	0.128676
8	-0.22979948	9.08396340	-2.08749007		8.00000000	4.29250000	38.99291289	0.150042
9	-0.21995309	9.10106370	-2.00180708		9.00000000	3.81555556	34.72561416	0.171423
10	-0.20979558	9.08648870	-1.90630517		10.00000000	3.43400000	31.20300220	0.192907
11	-0.19998716	9.09655280	-1.81919376		11.00000000	3.12181818	28.39778392	0.214286
12	-0.18983783	9.08978460	-1.72558498		12.00000000	2.86166667	26.01193360	0.235668
13	-0.18004057	9.10288810	-1.63888916		13.00000000	2.64153846	24.04562903	0.257028
14	-0.16992995	9.08117010	-1.54316278		14.00000000	2.45285714	22.27481295	0.278503
15	-0.16005155	9.10842510	-1.45781756		15.00000000	2.28933333	20.85222120	0.299879
16	-0.14989702	9.07717320	-1.36064121		16.00000000	2.14625000	19.48188298	0.321272
17	-0.13975216	9.08733750	-1.26997504		17.00000000	2.02000000	18.35642175	0.342661
18	-0.12991545	9.10338210	-1.18266998		18.00000000	1.90777778	17.36723007	0.364126
19	-0.11977804	9.08806510	-1.08855063		19.00000000	1.80736842	16.42548187	0.385506
20	-0.10996811	9.09804340	-1.00049464		20.00000000	1.71700000	15.62134052	0.406880
21	-0.09978976	9.08712100	-0.90680163		21.00000000	1.63523810	14.85960644	0.428357
22	-0.08997910	9.09633260	-0.81847979		22.00000000	1.56090909	14.19854825	0.449743
23	-0.07986774	9.09161660	-0.72612683		23.00000000	1.49304348	13.57417887	0.471078
24	-0.07003623	9.08818240	-0.63650205		24.00000000	1.43083333	13.00367432	0.492449
25	-0.05988021	9.09669300	-0.54471191		25.00000000	1.37360000	12.49521750	0.513928
26	-0.04970633	9.08831600	-0.45174683		26.00000000	1.32076923	12.00356813	0.535317
27	-0.03990683	9.08865450	-0.36269939		27.00000000	1.27185185	11.55942206	0.556681
28	-0.02975155	9.09864900	-0.27069893		28.00000000	1.22642857	11.15884310	0.578062
29	-0.01992154	9.10111240	-0.18130814		29.00000000	1.18413793	10.77697241	0.599551
30	-0.00982059	9.09329890	-0.08930160		30.00000000	1.14466667	10.40879614	0.620937
31	-0.00062249	9.08840560	-0.00565746		31.00000000	1.10774194	10.06760801	0.642407
32	0.00951471	9.08791160	0.08646887		32.00000000	1.07312500	9.75246514	0.663788
33	0.01936306	9.09198860	0.17604868		33.00000000	1.04060606	9.46117844	0.685272
34	0.02948455	9.09591390	0.26818893		34.00000000	1.01000000	9.18687304	0.706651
35	0.03930163	9.08746150	0.35715209		35.00000000	0.98114286	8.91609794	0.727994
36	0.04944694	9.09011840	0.44947858		36.00000000	0.95388889	8.67096294	0.749378
37	0.05927817	9.08467960	0.53852316		37.00000000	0.92810811	8.43156480	0.770852
38	0.06941976	9.09168340	0.63114245		38.00000000	0.90368421	8.21601074	0.792232
39	0.07956731	9.09616280	0.72375717		39.00000000	0.88051282	8.00928796	0.813592
40	0.08939332	9.08914380	0.81250872		40.00000000	0.85850000	7.80302995	0.834970
41	0.09953491	9.09106920	0.90487872		41.00000000	0.83756098	7.61432479	0.856513
42	0.10935199	9.08346940	0.99329545		42.00000000	0.81761905	7.42681760	0.877895
43	0.11949730	9.09099390	1.08634923		43.00000000	0.79860465	7.26011001	0.899280
44	0.12934266	9.09519770	1.17639706		44.00000000	0.78045455	7.09838839	0.920636
45	0.13947384	9.09286310	1.26821653		45.00000000	0.76311111	6.93886486	0.942109
46	0.14929613	9.08539870	1.35641487		46.00000000	0.74652174	6.78244764	0.963469
47	0.15947345	9.10035130	1.45126442		47.00000000	0.73063830	6.64906518	0.984865
48	0.16961578	9.08713050	1.54132073		48.00000000	0.71541667	6.50108461	1.006261
49	0.17944030	9.10071180	1.63303446		49.00000000	0.70081633	6.37792741	1.027725
50	0.18957072	9.08014870	1.72133033		50.00000000	0.68680000	6.23624613	1.049109
51	0.19937144	9.09941860	1.81416419		51.00000000	0.67333333	6.12694186	1.070500
52	0.20950410	9.07342620	1.90091999		52.00000000	0.66038462	5.99195107	1.091974
53	0.21934871	9.09623240	1.99524684		53.00000000	0.64792453	5.89367209	1.113361
54	0.22949106	9.08810040	2.08563779		54.00000000	0.63592593	5.77935866	1.134709
55	0.23932451	9.09283160	2.17613747		55.00000000	0.62436364	5.67723340	1.156082
56	0.24946611	9.09318070	2.26844042		56.00000000	0.61321429	5.57606831	1.177569
57	0.25958312	9.07725140	2.35630124		57.00000000	0.60245614	5.46864584	1.198954
58	0.26939127	9.10057640	2.45161583		58.00000000	0.59206897	5.38816885	1.220304
59	0.27956116	9.08753110	2.54052074		59.00000000	0.58203390	5.28925115	1.241680
60	0.28939462	9.09324550	2.63153633		60.00000000	0.57233333	5.20436751	1.263161
61	0.29955035	9.07352640	2.71797801		61.00000000	0.56295082	5.10794912	1.284541
62	0.30935329	9.09266950	2.81284722		62.00000000	0.55387097	5.03616566	1.305889
63	0.31947479	9.08866600	2.90359966		63.00000000	0.54507937	4.95404429	1.327263
64	0.32929185	9.09298320	2.99424526		64.00000000	0.53656250	4.87895380	1.348751
65	0.33946472	9.08265210	3.08323995		65.00000000	0.52830769	4.79843497	1.370124
66	0.34927285	9.09447190	3.17645212		66.00000000	0.52030303	4.73188129	1.391478
67	0.35941446	9.07828620	3.26286733		67.00000000	0.51253731	4.65296042	1.412862
68	0.36957836	9.09006120	3.35948991		68.00000000	0.50500000	4.59048091	1.434334
69	0.37940663	9.08658500	3.44751059		69.00000000	0.49768116	4.52222216	1.455761
70	0.38954747	9.08382510	3.53858109		70.00000000	0.49057143	4.45626506	1.477116
71	0.39937869	9.09276290	3.63145574		71.00000000	0.48366197	4.39782363	1.498491
72	0.40952250	9.08413220	3.72015653		72.00000000	0.47694444	4.33262639	1.519969
73	0.41935149	9.08468250	3.80967514		73.00000000	0.47041096	4.27353421	1.541347
74	0.42949086	9.08159730	3.90046303		74.00000000	0.46405405	4.21435204	1.562748
75	0.43931463	9.08038710	3.98914690		75.00000000	0.45786667	4.15760657	1.584105
76	0.44945621	9.08423710	4.08296678		76.00000000	0.45184211	4.10464082	1.605582
77	0.45960897	9.08292680	4.17459463		77.00000000	0.44597403	4.05074943	1.627024
78	0.46945882	9.07787230	4.26168722		78.00000000	0.44025641	3.99659147	1.648433
79	0.47960860	9.06664470	4.34844077		79.00000000	0.43468354	3.94112125	1.669803
80	0.48941451	9.06509880	4.43659089		80.00000000	0.42925000	3.89119366	1.691296
81	0.49957100	9.04801850	4.52012765		81.00000000	0.42395062	3.83591303	1.712683
82	0.50939029	9.04656310	4.60823140		82.00000000	0.41878049	3.78852411	1.734071
83	0.51953489	9.01442150	4.68330648		83.00000000	0.41373494	3.72958114	1.755551
84	0.52929908	8.99325080	4.76011937		84.00000000	0.40880952	3.67652658	1.776936
85	0.53944737	8.94117160	4.82329150		85.00000000	0.40400000	3.61223333	1.798293
86	0.54960239	8.86394500	4.87164536		86.00000000	0.39930233	3.53939385	1.819670
87	0.55940533	8.78923320	4.91674390		87.00000000	0.39471264	3.46922147	1.841147
88	0.56951416	8.65650460	4.93000195		88.00000000	0.39022727	3.37800418	1.862520
89	0.57934690	8.46420570	4.90371133		89.00000000	0.38584270	3.26585195	1.883880
90	0.58947730	8.22638230	4.84926563		90.00000000	0.38155556	3.13882187	1.905253
91	0.59925795	7.89013910	4.72822858		91.00000000	0.37736264	2.97744370	1.926735
92	0.60938019	7.41821860	4.52051546		92.00000000	0.37326087	2.76893073	1.948129
93	0.61918980	6.81247710	4.21821633		93.00000000	0.36924731	2.51548886	1.969466
94	0.62928820	5.99661590	3.77359963		94.00000000	0.36531915	2.19067862	1.990941
95	0.63941419	4.93927670	3.15824361		95.00000000	0.36147368	1.78541855	2.012450
96	0.64919555	3.65458850	2.37254259		96.00000000	0.35770833	1.30727676	2.033831
97	0.65922028	1.99694420	1.31642611		97.00000000	0.35402062	0.70695942	2.055237
98	0.66900235	0.08703095	0.05822391		98.00000000	0.35040816	0.03049635	2.076647
99	0.67910081	-2.30334380	-1.56420264		99.00000000	0.34686869	-0.79895784	2.098128
100	0.68881816	-4.97894760	-3.42958952		100.00000000	0.34340000	-1.70977061	2.119525
101	0.69905275	-8.23784450	-5.75868785		101.00000000	0.34000000	-2.80086713	2.140881
06:26 03/04/2018
Test Lot:	JK-PERC
Recipe:	Recipe_YJX-LID
Cell Name:	1-20-2-6h
Test Order:	4
Test Condition:	Light
1	-0.29978701	9.09817700	-2.72751528		1.00000000	34.34000000	312.43139818	0.000000
2	-0.28995469	9.08708100	-2.63484175		2.00000000	17.17000000	156.02518077	0.061793
3	-0.27982166	9.09242820	-2.54425835		3.00000000	11.44666667	104.07799480	0.083240
4	-0.26999307	9.07904430	-2.45127904		4.00000000	8.58500000	77.94359532	0.104750
5	-0.25983623	9.09180740	-2.36238096		5.00000000	6.86800000	62.44253322	0.126157
6	-0.24967344	9.08956430	-2.26942279		6.00000000	5.72333333	52.02260634	0.147522
7	-0.23987089	9.09413340	-2.18141787		7.00000000	4.90571429	44.61322014	0.168892
8	-0.22971034	9.08227160	-2.08629170		8.00000000	4.29250000	38.98565084	0.190374
9	-0.21991003	9.09586050	-2.00027096		9.00000000	3.81555556	34.70576106	0.211792
10	-0.20973904	9.08950230	-1.90642349		10.00000000	3.43400000	31.21335090	0.233177
11	-0.19992086	9.08889480	-1.81705966		11.00000000	3.12181818	28.37387704	0.254515
12	-0.18976477	9.09685230	-1.72626208		12.00000000	2.86166667	26.03215900	0.275994
13	-0.17998157	9.09641650	-1.63718732		13.00000000	2.64153846	24.02853405	0.297379
14	-0.16988130	9.08734800	-1.54377049		14.00000000	2.45285714	22.28996645	0.318767
15	-0.16001996	9.09162330	-1.45484120		15.00000000	2.28933333	20.81375627	0.340251
16	-0.14988025	9.09586050	-1.36328985		16.00000000	2.14625000	19.52199060	0.361642
17	-0.13973308	9.09544370	-1.27093436		17.00000000	2.02000000	18.37279627	0.382993
18	-0.12992086	9.07105350	-1.17851907		18.00000000	1.90777778	17.30555429	0.404410
19	-0.11981389	9.11075690	-1.09159523		19.00000000	1.80736842	16.46649431	0.425916
20	-0.10998826	9.08659550	-0.99941883		20.00000000	1.71700000	15.60168447	0.447288
21	-0.09981282	9.06731410	-0.90503420		21.00000000	1.63523810	14.82721744	0.468655
22	-0.09000655	9.10685160	-0.81967632		22.00000000	1.56090909	14.21496745	0.490032
23	-0.07982738	9.08909230	-0.72555845		23.00000000	1.49304348	13.57040998	0.511509
24	-0.07003079	9.09113790	-0.63665961		24.00000000	1.43083333	13.00790315	0.532894
25	-0.05987396	9.09313390	-0.54444191		25.00000000	1.37360000	12.49032873	0.554238
26	-0.04976327	9.08197590	-0.45194878		26.00000000	1.32076923	11.99519432	0.575610
27	-0.03992053	9.08785720	-0.36279205		27.00000000	1.27185185	11.55840801	0.597098
28	-0.02975699	9.09150980	-0.27053598		28.00000000	1.22642857	11.15008738	0.618479
29	-0.01991723	9.08242990	-0.18089684		29.00000000	1.18413793	10.75484975	0.639826
30	-0.00979091	9.09484100	-0.08904675		30.00000000	1.14466667	10.41056133	0.661207
31	-0.00059200	9.08890340	-0.00538059		31.00000000	1.10774194	10.06815944	0.682807
32	0.00956166	9.08154870	0.08683464		32.00000000	1.07312500	9.74563695	0.704172
33	0.01935574	9.10155490	0.17616728		33.00000000	1.04060606	9.47113319	0.725542
34	0.02947954	9.08569910	0.26784218		34.00000000	1.01000000	9.17655609	0.746918
35	0.03934358	9.08883190	0.35758716		35.00000000	0.98114286	8.91744250	0.768391
36	0.04949194	9.10439210	0.45059401		36.00000000	0.95388889	8.68457846	0.789773
37	0.05932026	9.07592680	0.53838630		37.00000000	0.92810811	8.42344125	0.811125
38	0.06947159	9.09669690	0.63196200		38.00000000	0.90368421	8.22054136	0.832497
39	0.07959465	9.08850770	0.72339658		39.00000000	0.88051282	8.00254755	0.853982
40	0.08942818	9.09602260	0.81344074		40.00000000	0.85850000	7.80893540	0.875350
41	0.09957133	9.08034710	0.90414219		41.00000000	0.83756098	7.60534438	0.896742
42	0.10937211	9.08977320	0.99416767		42.00000000	0.81761905	7.43197171	0.918091
43	0.11954726	9.09617140	1.08742237		43.00000000	0.79860465	7.26424479	0.939564
44	0.12936591	9.09571080	1.17667490		44.00000000	0.78045455	7.09878884	0.960945
45	0.13951203	9.08936600	1.26807590		45.00000000	0.76311111	6.93619619	0.982325
46	0.14933662	9.08210950	1.35629154		46.00000000	0.74652174	6.77999218	1.003807
47	0.15947606	9.09976100	1.45119403		47.00000000	0.73063830	6.64863389	1.025191
48	0.16963707	9.07750030	1.53988055		48.00000000	0.71541667	6.49419501	1.046537
49	0.17943785	9.09114650	1.63129578		49.00000000	0.70081633	6.37122389	1.067961
50	0.18956834	9.07130240	1.71963174		50.00000000	0.68680000	6.23017049	1.089442
51	0.19935276	9.09130290	1.81237633		51.00000000	0.67333333	6.12147729	1.110821
52	0.20952046	9.09298040	1.90516544		52.00000000	0.66038462	6.00486436	1.132183
53	0.21930858	9.09216400	1.99398958		53.00000000	0.64792453	5.89103607	1.153555
54	0.22945918	9.11249350	2.09094529		54.00000000	0.63592593	5.79487087	1.175036
55	0.23926592	9.07891560	2.17227509		55.00000000	0.62436364	5.66854476	1.196424
56	0.24943958	9.09467410	2.26857169		56.00000000	0.61321429	5.57698408	1.217786
57	0.25957751	9.08827780	2.35911252		57.00000000	0.60245614	5.47528877	1.239163
58	0.26941180	9.09649660	2.45070352		58.00000000	0.59206897	5.38575333	1.260643
59	0.27956089	9.07344820	2.53658125		59.00000000	0.58203390	5.28105443	1.282018
60	0.28937805	9.09377290	2.63153827		60.00000000	0.57233333	5.20466936	1.303358
61	0.29952419	9.10615730	2.72751439		61.00000000	0.56295082	5.12631872	1.324737
62	0.30936441	9.08072280	2.80925245		62.00000000	0.55387097	5.02954873	1.346225
63	0.31950608	9.08802030	2.90367774		63.00000000	0.54507937	4.95369233	1.367599
64	0.32929793	9.09102920	2.99365710		64.00000000	0.53656250	4.87790536	1.388952
65	0.33946562	9.08057400	3.08254268		65.00000000	0.52830769	4.79733709	1.410327
66	0.34925747	9.07848170	3.17072755		66.00000000	0.52030303	4.72356154	1.431800
67	0.35940957	9.08586600	3.26554719		67.00000000	0.51253731	4.65684535	1.453181
68	0.36962491	9.09446240	3.36153985		68.00000000	0.50500000	4.59270351	1.474548
69	0.37944949	9.08428100	3.44702579		69.00000000	0.49768116	4.52107550	1.495917
70	0.38956884	9.08280090	3.53837621		70.00000000	0.49057143	4.45576261	1.517393
71	0.39940384	9.09014510	3.63063886		71.00000000	0.48366197	4.39655750	1.538766
72	0.40952095	9.08644680	3.72109033		72.00000000	0.47694444	4.33373032	1.560152
73	0.41935298	9.08186440	3.80850690		73.00000000	0.47041096	4.27220854	1.581503
74	0.42948422	9.08528040	3.90198457		74.00000000	0.46405405	4.21606120	1.602980
75	0.43930584	9.07449340	3.98647795		75.00000000	0.45786667	4.15490804	1.624369
76	0.44948027	9.09037690	4.08594506		76.00000000	0.45184211	4.10741504	1.645742
77	0.45962414	9.08309560	4.17481000		77.00000000	0.44597403	4.05082471	1.667273
78	0.46948224	9.08689400	4.26613535		78.00000000	0.44025641	4.00056333	1.688663
79	0.47961199	9.07349680	4.35175786		79.00000000	0.43468354	3.94409975	1.710010
80	0.48943436	9.06731220	4.43785414		80.00000000	0.42925000	3.89214376	1.731391
81	0.49958050	9.05328560	4.52284495		81.00000000	0.42395062	3.83814602	1.752873
82	0.50937605	9.03702160	4.60324237		82.00000000	0.41878049	3.78452831	1.774243
83	0.51952440	9.01631830	4.68419736		83.00000000	0.41373494	3.73036591	1.795600
84	0.52931404	8.99411770	4.76071278		84.00000000	0.40880952	3.67688097	1.816969
85	0.53944153	8.93737790	4.82119281		85.00000000	0.40400000	3.61070067	1.838446
86	0.54957575	8.87854670	4.87943396		86.00000000	0.39930233	3.54522435	1.859841
87	0.55938995	8.78639980	4.91502374		87.00000000	0.39471264	3.46810309	1.881192
88	0.56953460	8.65128900	4.92720842		88.00000000	0.39022727	3.37596891	1.902565
89	0.57934505	8.48919300	4.91817194		89.00000000	0.38584270	3.27549312	1.924053
90	0.58946735	8.23068620	4.85172078		90.00000000	0.38155556	3.14046405	1.945421
91	0.59928155	7.89730550	4.73270948		91.00000000	0.37736264	2.98014803	1.966761
92	0.60938448	7.41754390	4.52013613		92.00000000	0.37326087	2.76867889	1.988247
93	0.61919421	6.80967280	4.21650997		93.00000000	0.36924731	2.51445338	2.009763
94	0.62929565	6.00490190	3.77885864		94.00000000	0.36531915	2.19370565	2.031148
95	0.63941574	4.93934820	3.15829698		95.00000000	0.36147368	1.78544439	2.052499
96	0.64919567	3.65263700	2.37127612		96.00000000	0.35770833	1.30657869	2.073924
97	0.65925252	2.01619890	1.32918421		97.00000000	0.35402062	0.71377598	2.095416
98	0.66900712	0.08538026	0.05712000		98.00000000	0.35040816	0.02991794	2.116803
99	0.67915994	-2.27977090	-1.54832907		99.00000000	0.34686869	-0.79078114	2.138162
100	0.68882453	-4.96338420	-3.41890079		100.00000000	0.34340000	-1.70442613	2.159531
101	0.69912100	-8.21523570	-5.74344380		101.00000000	0.34000000	-2.79318014	2.181014
