# Supplementary material for: Study on the Electrical Injection Regeneration of Industrialized B-Doped Czochralski Silicon PERC Solar Cells
Source: Hindawi journal article supplement (doi:10.1155/2019/5357370), 2019-06-20
Supplement: f1 [file 5357370.f1.zip › section3.1/IVRawData_1-20-2-10min.csv]

00:03 03/04/2018
Test Lot:	JK-PERC
Recipe:	Recipe_YJX-LID
Cell Name:	1-20-2-10min
Test Order:	2
Test Condition:	Light
1	-0.29979092	9.09398080	-2.72629287		1.00000000	34.34000000	312.28730067	0.000000
2	-0.28998375	9.10434440	-2.64011193		2.00000000	17.17000000	156.32159335	0.061766
3	-0.27982897	9.08782480	-2.54303665		3.00000000	11.44666667	104.02530121	0.083190
4	-0.27006048	9.09552000	-2.45634050		4.00000000	8.58500000	78.08503920	0.104685
5	-0.25989377	9.09722520	-2.36431215		5.00000000	6.86800000	62.47974267	0.126085
6	-0.24972931	9.09742740	-2.27189427		6.00000000	5.72333333	52.06760949	0.147434
7	-0.23994371	9.10169600	-2.18389471		7.00000000	4.90571429	44.65032009	0.168812
8	-0.22978595	9.08720590	-2.08811224		8.00000000	4.29250000	39.00683133	0.190330
9	-0.21995792	9.08535860	-1.99839658		9.00000000	3.81555556	34.66569048	0.211708
10	-0.20980015	9.08679870	-1.90641173		10.00000000	3.43400000	31.20406674	0.233094
11	-0.19999222	9.07603840	-1.81513707		11.00000000	3.12181818	28.33374170	0.254454
12	-0.18983817	9.09881880	-1.72730311		12.00000000	2.86166667	26.03778647	0.275933
13	-0.18004587	9.08512120	-1.63573855		13.00000000	2.64153846	23.99869708	0.297312
14	-0.16991119	9.09247590	-1.54491340		14.00000000	2.45285714	22.30254446	0.318698
15	-0.16006604	9.09327320	-1.45552423		15.00000000	2.28933333	20.81753345	0.340124
16	-0.14994846	9.09631250	-1.36397805		16.00000000	2.14625000	19.52296070	0.361652
17	-0.13976391	9.09853550	-1.27164690		17.00000000	2.02000000	18.37904171	0.383019
18	-0.12995970	9.09277630	-1.18169448		18.00000000	1.90777778	17.34699656	0.404395
19	-0.11980714	9.08959200	-1.08899802		19.00000000	1.80736842	16.42824154	0.425747
20	-0.10995827	9.09112260	-0.99964411		20.00000000	1.71700000	15.60945750	0.447233
21	-0.09980349	9.08664990	-0.90687933		21.00000000	1.63523810	14.85883607	0.468624
22	-0.08997620	9.08969880	-0.81785655		22.00000000	1.56090909	14.18819349	0.489999
23	-0.07983556	9.08236600	-0.72509574		23.00000000	1.49304348	13.56036732	0.511351
24	-0.07002167	9.08882430	-0.63641463		24.00000000	1.43083333	13.00459277	0.532823
25	-0.05987879	9.09101870	-0.54435923		25.00000000	1.37360000	12.48742329	0.554205
26	-0.04970242	9.09716700	-0.45215122		26.00000000	1.32076923	12.01525826	0.575593
27	-0.03989895	9.08452030	-0.36246283		27.00000000	1.27185185	11.55416397	0.596934
28	-0.02974863	9.09701160	-0.27062365		28.00000000	1.22642857	11.15683494	0.618399
29	-0.01995038	9.08447740	-0.18123873		29.00000000	1.18413793	10.75727427	0.639770
30	-0.00980452	9.09604550	-0.08918237		30.00000000	1.14466667	10.41194008	0.661154
31	-0.00063075	9.08880420	-0.00573277		31.00000000	1.10774194	10.06804956	0.682757
32	0.00951490	9.09603020	0.08654778		32.00000000	1.07312500	9.76117741	0.704138
33	0.01935009	9.09735010	0.17603452		33.00000000	1.04060606	9.46675765	0.725491
34	0.02949119	9.08659360	0.26797444		34.00000000	1.01000000	9.17745954	0.746869
35	0.03930182	9.09504600	0.35745182		35.00000000	0.98114286	8.92353942	0.768336
36	0.04943622	9.08571240	0.44916327		36.00000000	0.95388889	8.66676011	0.789715
37	0.05923718	9.09492590	0.53875772		37.00000000	0.92810811	8.44107447	0.811066
38	0.06939688	9.09148120	0.63092046		38.00000000	0.90368421	8.21582801	0.832426
39	0.07954171	9.08882810	0.72294089		39.00000000	0.88051282	8.00282967	0.853915
40	0.08937690	9.10554890	0.81382571		40.00000000	0.85850000	7.81711373	0.875295
41	0.09952916	9.08410840	0.90413370		41.00000000	0.83756098	7.60849469	0.896641
42	0.10932937	9.08464720	0.99321876		42.00000000	0.81761905	7.42778059	0.918030
43	0.11949950	9.09358410	1.08667875		43.00000000	0.79860465	7.26217856	0.939505
44	0.12931162	9.08524990	1.17482838		44.00000000	0.78045455	7.09062458	0.960968
45	0.13945271	9.09905910	1.26888845		45.00000000	0.76311111	6.94359310	0.982322
46	0.14927749	9.09116080	1.35710567		46.00000000	0.74652174	6.78674917	1.003695
47	0.15942678	9.08277510	1.44803759		47.00000000	0.73063830	6.63622334	1.025170
48	0.16956043	9.09873870	1.54278605		48.00000000	0.71541667	6.50938931	1.046531
49	0.17938967	9.08268360	1.62933961		49.00000000	0.70081633	6.36529296	1.067875
50	0.18953300	9.09253120	1.72333472		50.00000000	0.68680000	6.24475043	1.089244
51	0.19932577	9.09244250	1.81235810		51.00000000	0.67333333	6.12224462	1.110724
52	0.20948176	9.09114270	1.90442857		52.00000000	0.66038462	6.00365078	1.132097
53	0.21931322	9.08288190	1.99199608		53.00000000	0.64792453	5.88502197	1.153468
54	0.22943275	9.09702680	2.08715588		54.00000000	0.63592593	5.78503519	1.174838
55	0.23928431	9.09054470	2.17522472		55.00000000	0.62436364	5.67580555	1.196308
56	0.24941127	9.08684060	2.26636045		56.00000000	0.61321429	5.57218047	1.217690
57	0.25956726	9.09714700	2.36132152		57.00000000	0.60245614	5.48063207	1.239074
58	0.26938534	9.08357620	2.44698226		58.00000000	0.59206897	5.37810356	1.260424
59	0.27956140	9.07808400	2.53788187		59.00000000	0.58203390	5.28375262	1.281892
60	0.28937426	9.10102370	2.63360200		60.00000000	0.57233333	5.20881923	1.303257
61	0.29949304	9.07564740	2.71809323		61.00000000	0.56295082	5.10914314	1.324645
62	0.30932748	9.09122940	2.81216708		62.00000000	0.55387097	5.03536803	1.346127
63	0.31948346	9.08840750	2.90359587		63.00000000	0.54507937	4.95390339	1.367516
64	0.32930079	9.08575060	2.99194485		64.00000000	0.53656250	4.87507306	1.388883
65	0.33944860	9.09448150	3.08710901		65.00000000	0.52830769	4.80468453	1.410262
66	0.34927487	9.08964060	3.17478304		66.00000000	0.52030303	4.72936755	1.431742
67	0.35940033	9.08933160	3.26670878		67.00000000	0.51253731	4.65862160	1.453133
68	0.36954442	9.08622650	3.35776430		68.00000000	0.50500000	4.58854438	1.474479
69	0.37937513	9.08327390	3.44596822		69.00000000	0.49768116	4.52057429	1.495862
70	0.38950208	9.08256150	3.53767660		70.00000000	0.49057143	4.45564517	1.517345
71	0.39934918	9.08230110	3.62700950		71.00000000	0.48366197	4.39276366	1.538719
72	0.40949625	9.08738420	3.72124975		72.00000000	0.47694444	4.33417741	1.560070
73	0.41930613	9.08630280	3.80994246		73.00000000	0.47041096	4.27429641	1.581453
74	0.42948669	9.08287720	3.90097486		74.00000000	0.46405405	4.21494599	1.602924
75	0.43927720	9.08777620	3.99205288		75.00000000	0.45786667	4.16098980	1.624309
76	0.44942799	9.07376000	4.07800172		76.00000000	0.45184211	4.09990682	1.645645
77	0.45957875	9.09312340	4.17900629		77.00000000	0.44597403	4.05529685	1.667023
78	0.46943554	9.07245540	4.25893300		78.00000000	0.44025641	3.99420665	1.688497
79	0.47960046	9.09115410	4.36012169		79.00000000	0.43468354	3.95177509	1.709871
80	0.48939994	9.05910490	4.43352539		80.00000000	0.42925000	3.88862078	1.731210
81	0.49952316	9.05971910	4.52553951		81.00000000	0.42395062	3.84087350	1.752584
82	0.50937474	9.05092140	4.61031073		82.00000000	0.41878049	3.79034928	1.774053
83	0.51949722	9.00541110	4.67828603		83.00000000	0.41373494	3.72585322	1.795418
84	0.52928704	9.00396250	4.76568066		84.00000000	0.40880952	3.68090562	1.816778
85	0.53944522	8.94994540	4.82800527		85.00000000	0.40400000	3.61577794	1.838146
86	0.54957813	8.91286850	4.89831760		86.00000000	0.39930233	3.55892912	1.859624
87	0.55938953	8.81373980	4.93031376		87.00000000	0.39471264	3.47889454	1.881018
88	0.56951499	8.70848750	4.95961417		88.00000000	0.39022727	3.39828933	1.902402
89	0.57932633	8.53164960	4.94260925		89.00000000	0.38584270	3.29187469	1.923757
90	0.58946967	8.30577660	4.89600339		90.00000000	0.38155556	3.16911520	1.945242
91	0.59924686	7.99631120	4.79176438		91.00000000	0.37736264	3.01750908	1.966608
92	0.60938048	7.57840870	4.61813433		92.00000000	0.37326087	2.82872342	1.988097
93	0.61920077	7.00339940	4.33651030		93.00000000	0.36924731	2.58598640	2.009598
94	0.62930614	6.21703620	3.91241905		94.00000000	0.36531915	2.27120237	2.030970
95	0.63943017	5.21398740	3.33398085		95.00000000	0.36147368	1.88471923	2.052329
96	0.64921325	3.95037960	2.56463878		96.00000000	0.35770833	1.41308370	2.073710
97	0.65931267	2.33010840	1.53626999		97.00000000	0.35402062	0.82490642	2.095193
98	0.66902578	0.40986738	0.27421184		98.00000000	0.35040816	0.14362088	2.116591
99	0.67914456	-1.97582910	-1.34187358		99.00000000	0.34686869	-0.68535325	2.137943
100	0.68884802	-4.69411040	-3.23352865		100.00000000	0.34340000	-1.61195751	2.159313
101	0.69906127	-8.01641370	-5.60396434		101.00000000	0.34000000	-2.72558066	2.180832
00:03 03/04/2018
Test Lot:	JK-PERC
Recipe:	Recipe_YJX-LID
Cell Name:	1-20-2-10min
Test Order:	3
Test Condition:	Light
1	-0.29979509	9.10020450	-2.72819663		1.00000000	34.34000000	312.50102253	0.000000
2	-0.29003870	9.09100250	-2.63674255		2.00000000	17.17000000	156.09251293	0.061789
3	-0.27985060	9.09502600	-2.54524848		3.00000000	11.44666667	104.10773095	0.083208
4	-0.27003095	9.09188560	-2.45509051		4.00000000	8.58500000	78.05383788	0.104702
5	-0.25986367	9.08840270	-2.36174568		5.00000000	6.86800000	62.41914974	0.126139
6	-0.24971728	9.08293720	-2.26816637		6.00000000	5.72333333	51.98467724	0.147526
7	-0.23990357	9.10022930	-2.18317750		7.00000000	4.90571429	44.64312488	0.168890
8	-0.22974524	9.08167550	-2.08647172		8.00000000	4.29250000	38.98309208	0.190381
9	-0.21993376	9.09206770	-1.99965264		9.00000000	3.81555556	34.69128942	0.211760
10	-0.20977545	9.08519840	-1.90585158		10.00000000	3.43400000	31.19857131	0.233145
11	-0.19994462	9.09181400	-1.81785930		11.00000000	3.12181818	28.38299025	0.254483
12	-0.18981011	9.09292510	-1.72592911		12.00000000	2.86166667	26.02092066	0.275962
13	-0.18001054	9.09338760	-1.63690561		13.00000000	2.64153846	24.02053309	0.297351
14	-0.16988944	9.08989810	-1.54427770		14.00000000	2.45285714	22.29622148	0.318733
15	-0.16000278	9.09201720	-1.45474803		15.00000000	2.28933333	20.81465804	0.340206
16	-0.14984670	9.09508130	-1.36286792		16.00000000	2.14625000	19.52031824	0.361607
17	-0.13973154	9.08415220	-1.26934258		17.00000000	2.02000000	18.34998744	0.382952
18	-0.12990592	9.08698940	-1.18045372		18.00000000	1.90777778	17.33595644	0.404320
19	-0.11977291	9.09188750	-1.08896182		19.00000000	1.80736842	16.43239036	0.425816
20	-0.10994358	9.07782550	-0.99804863		20.00000000	1.71700000	15.58662638	0.447206
21	-0.09981428	9.10314370	-0.90862374		21.00000000	1.63523810	14.88580736	0.468558
22	-0.08998941	9.07481670	-0.81663739		22.00000000	1.56090909	14.16496389	0.489941
23	-0.07983257	9.10263920	-0.72668707		23.00000000	1.49304348	13.59063609	0.511425
24	-0.07002184	9.08717920	-0.63630099		24.00000000	1.43083333	13.00223891	0.532812
25	-0.05983226	9.08275220	-0.54344155		25.00000000	1.37360000	12.47606842	0.554157
26	-0.04972678	9.09682370	-0.45235576		26.00000000	1.32076923	12.01480484	0.575534
27	-0.03987585	9.08548740	-0.36229157		27.00000000	1.27185185	11.55539397	0.597008
28	-0.02973465	9.09058860	-0.27030548		28.00000000	1.22642857	11.14895759	0.618400
29	-0.01993434	9.09420490	-0.18128698		29.00000000	1.18413793	10.76879297	0.639752
30	-0.00981770	9.08811380	-0.08922437		30.00000000	1.14466667	10.40286093	0.661131
31	-0.00063814	9.08405880	-0.00579692		31.00000000	1.10774194	10.06279288	0.682722
32	0.00949467	9.09811500	0.08638357		32.00000000	1.07312500	9.76341466	0.704102
33	0.01932819	9.08816720	0.17565784		33.00000000	1.04060606	9.45720187	0.725466
34	0.02945645	9.08942890	0.26774234		34.00000000	1.01000000	9.18032319	0.746845
35	0.03929444	9.08893680	0.35714472		35.00000000	0.98114286	8.91754542	0.768319
36	0.04944429	9.08714580	0.44930745		36.00000000	0.95388889	8.66812741	0.789706
37	0.05924804	9.07847310	0.53788175		37.00000000	0.92810811	8.42580449	0.811087
38	0.06942022	9.10831170	0.63230098		38.00000000	0.90368421	8.23103747	0.832465
39	0.07955741	9.07864190	0.72227324		39.00000000	0.88051282	7.99386059	0.853953
40	0.08936191	9.10064030	0.81325056		40.00000000	0.85850000	7.81289970	0.875341
41	0.09954525	9.08718590	0.90458617		41.00000000	0.83756098	7.61107229	0.896729
42	0.10935719	9.08822060	0.99386227		42.00000000	0.81761905	7.43070227	0.918078
43	0.11950555	9.07935240	1.08503300		43.00000000	0.79860465	7.25081306	0.939548
44	0.12936437	9.10148430	1.17740778		44.00000000	0.78045455	7.10329479	0.960945
45	0.13947031	9.07563300	1.26578135		45.00000000	0.76311111	6.92571638	0.982328
46	0.14930829	9.09408660	1.35782252		46.00000000	0.74652174	6.78893334	1.003815
47	0.15948196	9.09521960	1.45052345		47.00000000	0.73063830	6.64531577	1.025204
48	0.16960427	9.09163860	1.54198073		48.00000000	0.71541667	6.50430978	1.046542
49	0.17941099	9.09172730	1.63115580		49.00000000	0.70081633	6.37163093	1.067911
50	0.18956828	9.09149360	1.72345880		50.00000000	0.68680000	6.24403780	1.089402
51	0.19935195	9.09458540	1.81302333		51.00000000	0.67333333	6.12368750	1.110783
52	0.20946383	9.08664510	1.90332348		52.00000000	0.66038462	6.00068063	1.132143
53	0.21932118	9.09222410	1.99411732		53.00000000	0.64792453	5.89107501	1.153515
54	0.22943753	9.08205600	2.08376450		54.00000000	0.63592593	5.77551487	1.175011
55	0.23928742	9.08325580	2.17350885		55.00000000	0.62436364	5.67125462	1.196405
56	0.24942982	9.08495330	2.26605827		56.00000000	0.61321429	5.57102315	1.217751
57	0.25958264	9.08071800	2.35719675		57.00000000	0.60245614	5.47073432	1.239124
58	0.26938194	9.08021740	2.44604658		58.00000000	0.59206897	5.37611492	1.260604
59	0.27956676	9.08190630	2.53899912		59.00000000	0.58203390	5.28597733	1.281982
60	0.28935117	9.08276560	2.62810885		60.00000000	0.57233333	5.19836951	1.303341
61	0.29951143	9.08617310	2.72141270		61.00000000	0.56295082	5.11506859	1.324715
62	0.30931965	9.09486960	2.81322188		62.00000000	0.55387097	5.03738423	1.346196
63	0.31947693	9.08037570	2.90097055		63.00000000	0.54507937	4.94952542	1.367579
64	0.32929260	9.08868310	2.99283609		64.00000000	0.53656250	4.87664653	1.388939
65	0.33943352	9.08520510	3.08382315		65.00000000	0.52830769	4.79978374	1.410314
66	0.34925589	9.09747120	3.17734540		66.00000000	0.52030303	4.73344183	1.431786
67	0.35937595	9.08156870	3.26369738		67.00000000	0.51253731	4.65464282	1.453157
68	0.36954218	9.09488960	3.36094533		68.00000000	0.50500000	4.59291925	1.474511
69	0.37939280	9.08084960	3.44520896		69.00000000	0.49768116	4.51936776	1.495888
70	0.38953373	9.09065250	3.54111578		70.00000000	0.49057143	4.45961438	1.517378
71	0.39936280	9.08307270	3.62744135		71.00000000	0.48366197	4.39313685	1.538752
72	0.40951934	9.08033750	3.71857382		72.00000000	0.47694444	4.33081652	1.560141
73	0.41931489	9.08602810	3.80990687		73.00000000	0.47041096	4.27416719	1.581489
74	0.42946848	9.08231830	3.90056944		74.00000000	0.46405405	4.21468663	1.602998
75	0.43928710	9.07969950	3.98859486		75.00000000	0.45786667	4.15729174	1.624385
76	0.44944289	9.07489010	4.07864483		76.00000000	0.45184211	4.10041745	1.645762
77	0.45960987	9.07101060	4.16912600		77.00000000	0.44597403	4.04543512	1.667240
78	0.46945977	9.07763200	4.26158303		78.00000000	0.44025641	3.99648568	1.688636
79	0.47960439	9.06361100	4.34694762		79.00000000	0.43468354	3.93980255	1.709992
80	0.48942825	9.06427000	4.43630980		80.00000000	0.42925000	3.89083790	1.731374
81	0.49956247	9.03645040	4.51427148		81.00000000	0.42395062	3.83100873	1.752861
82	0.50937963	9.05471230	4.61228600		82.00000000	0.41878049	3.79193683	1.774238
83	0.51950192	9.02744580	4.68977543		83.00000000	0.41373494	3.73496974	1.795592
84	0.52930194	8.99100020	4.75895385		84.00000000	0.40880952	3.67560651	1.816972
85	0.53944659	8.95340540	4.82988401		85.00000000	0.40400000	3.61717578	1.838446
86	0.54957563	8.88608550	4.88357604		86.00000000	0.39930233	3.54823461	1.859840
87	0.55940169	8.80580810	4.92598393		87.00000000	0.39471264	3.47576379	1.881188
88	0.56954110	8.69998840	4.95500096		88.00000000	0.39022727	3.39497275	1.902561
89	0.57933295	8.53323840	4.94358618		89.00000000	0.38584270	3.29248772	1.924044
90	0.58947533	8.30128100	4.89340036		90.00000000	0.38155556	3.16739988	1.945420
91	0.59927613	7.98119780	4.78294133		91.00000000	0.37736264	3.01180585	1.966764
92	0.60937911	7.56209900	4.60818516		92.00000000	0.37326087	2.82263565	1.988232
93	0.61918360	6.97868680	4.32108842		93.00000000	0.36924731	2.57686134	2.009745
94	0.62928206	6.20607850	3.90537386		94.00000000	0.36531915	2.26719932	2.031127
95	0.63942301	5.18516730	3.31551528		95.00000000	0.36147368	1.87430153	2.052491
96	0.64919621	3.94607210	2.56177505		96.00000000	0.35770833	1.41154287	2.073863
97	0.65931481	2.32041550	1.52988430		97.00000000	0.35402062	0.82147493	2.095344
98	0.66903520	0.42536294	0.28458278		98.00000000	0.35040816	0.14905065	2.116787
99	0.67911732	-1.93873480	-1.31662838		99.00000000	0.34686869	-0.67248639	2.138167
100	0.68881983	-4.61854550	-3.18134573		100.00000000	0.34340000	-1.58600852	2.159542
101	0.69904786	-7.89446540	-5.51860914		101.00000000	0.34000000	-2.68411824	2.181032
00:03 03/04/2018
Test Lot:	JK-PERC
Recipe:	Recipe_YJX-LID
Cell Name:	1-20-2-10min
Test Order:	4
Test Condition:	Light
1	-0.29975641	9.08252140	-2.72254401		1.00000000	34.34000000	311.89378488	0.000000
2	-0.28997135	9.09808920	-2.63818521		2.00000000	17.17000000	156.21419156	0.021525
3	-0.27989170	9.09031200	-2.54430288		3.00000000	11.44666667	104.05377136	0.083280
4	-0.27002120	9.09024050	-2.45455765		4.00000000	8.58500000	78.03971469	0.104685
5	-0.25986415	9.09201150	-2.36268784		5.00000000	6.86800000	62.44393498	0.126175
6	-0.24971230	9.08773900	-2.26932021		6.00000000	5.72333333	52.01215954	0.147576
7	-0.23989540	9.09832760	-2.18264694		7.00000000	4.90571429	44.63379568	0.168968
8	-0.22977111	9.08930110	-2.08845880		8.00000000	4.29250000	39.01582497	0.190325
9	-0.21994752	9.08362390	-1.99792055		9.00000000	3.81555556	34.65907164	0.211800
10	-0.20978747	9.08880040	-1.90671644		10.00000000	3.43400000	31.21094057	0.233166
11	-0.19998769	9.07878400	-1.81564504		11.00000000	3.12181818	28.34231296	0.254538
12	-0.18984330	9.10254290	-1.72805678		12.00000000	2.86166667	26.04844360	0.276037
13	-0.18007031	9.08288960	-1.63555875		13.00000000	2.64153846	23.99280222	0.297416
14	-0.16989242	9.10601430	-1.54704281		14.00000000	2.45285714	22.33575222	0.318808
15	-0.16007999	9.08965970	-1.45507263		15.00000000	2.28933333	20.80926094	0.340181
16	-0.14992888	9.08327010	-1.36184451		16.00000000	2.14625000	19.49496845	0.361649
17	-0.13979714	9.10408500	-1.27272505		17.00000000	2.02000000	18.39025170	0.383049
18	-0.12996908	9.08010100	-1.18013237		18.00000000	1.90777778	17.32281491	0.404398
19	-0.11982914	9.09195420	-1.08948105		19.00000000	1.80736842	16.43251091	0.425764
20	-0.11000033	9.09523010	-1.00047831		20.00000000	1.71700000	15.61651008	0.447240
21	-0.09982095	9.09530740	-0.90790222		21.00000000	1.63523810	14.87299315	0.468619
22	-0.09004872	9.08326820	-0.81793663		22.00000000	1.56090909	14.17815591	0.489959
23	-0.07990729	9.09869290	-0.72705190		23.00000000	1.49304348	13.58474410	0.511325
24	-0.07004797	9.08868500	-0.63664391		24.00000000	1.43083333	13.00439345	0.532795
25	-0.05994525	9.09270380	-0.54506438		25.00000000	1.37360000	12.48973794	0.554164
26	-0.04978522	9.08777050	-0.45243661		26.00000000	1.32076923	12.00284765	0.575534
27	-0.03992515	9.08536240	-0.36273443		27.00000000	1.27185185	11.55523499	0.596912
28	-0.02976884	9.09226320	-0.27066611		28.00000000	1.22642857	11.15101137	0.618391
29	-0.01995864	9.09118370	-0.18144764		29.00000000	1.18413793	10.76521546	0.639777
30	-0.00983210	9.10273840	-0.08949905		30.00000000	1.14466667	10.41960122	0.661116
31	-0.00063002	9.08961300	-0.00572660		31.00000000	1.10774194	10.06894550	0.682649
32	0.00950227	9.08406070	0.08631917		32.00000000	1.07312500	9.74833264	0.704138
33	0.01932558	9.09724810	0.17580963		33.00000000	1.04060606	9.46665151	0.725506
34	0.02947788	9.09094140	0.26798171		34.00000000	1.01000000	9.18185081	0.746872
35	0.03927590	9.09110360	0.35706124		35.00000000	0.98114286	8.91967136	0.768243
36	0.04940884	9.07678510	0.44847344		36.00000000	0.95388889	8.65824445	0.789716
37	0.05926565	9.09992980	0.53931326		37.00000000	0.92810811	8.44571863	0.811105
38	0.06939488	9.09373190	0.63105842		38.00000000	0.90368421	8.21786193	0.832492
39	0.07956728	9.08527760	0.72289079		39.00000000	0.88051282	7.99970340	0.853843
40	0.08937942	9.08083530	0.81163981		40.00000000	0.85850000	7.79589711	0.875309
41	0.09951237	9.09536360	0.90510117		41.00000000	0.83756098	7.61792161	0.896700
42	0.10932899	9.09979630	0.99487154		42.00000000	0.81761905	7.44016678	0.918111
43	0.11949841	9.08590030	1.08575064		43.00000000	0.79860465	7.25604224	0.939593
44	0.12930907	9.08754350	1.17510180		44.00000000	0.78045455	7.09241463	0.960963
45	0.13946360	9.08713820	1.26732501		45.00000000	0.76311111	6.93449613	0.982318
46	0.14926682	9.08920570	1.35671683		46.00000000	0.74652174	6.78528965	1.003685
47	0.15942359	9.09781170	1.45040580		47.00000000	0.73063830	6.64720965	1.025173
48	0.16955876	9.08254430	1.54002495		48.00000000	0.71541667	6.49780357	1.046559
49	0.17938134	9.09534070	1.63153440		49.00000000	0.70081633	6.37416326	1.067913
50	0.18952173	9.08397390	1.72161045		50.00000000	0.68680000	6.23887327	1.089289
51	0.19930559	9.07917790	1.80953091		51.00000000	0.67333333	6.11331312	1.110773
52	0.20947503	9.09393020	1.90495130		52.00000000	0.66038462	6.00549160	1.132142
53	0.21929982	9.09008030	1.99345297		53.00000000	0.64792453	5.88968599	1.153493
54	0.22942458	9.07184410	2.08130402		54.00000000	0.63592593	5.76902086	1.174870
55	0.23926502	9.10272310	2.17796322		55.00000000	0.62436364	5.68340930	1.196347
56	0.24941210	9.08360860	2.26556190		56.00000000	0.61321429	5.57019856	1.217717
57	0.25952792	9.09270000	2.35980952		57.00000000	0.60245614	5.47795295	1.239070
58	0.26939368	9.07608410	2.44503970		58.00000000	0.59206897	5.37366772	1.260436
59	0.27951398	9.08837800	2.54032871		59.00000000	0.58203390	5.28974408	1.281919
60	0.28935888	9.08138280	2.62777876		60.00000000	0.57233333	5.19757809	1.303288
61	0.29949927	9.08730510	2.72164124		61.00000000	0.56295082	5.11570585	1.324642
62	0.30933300	9.08733180	2.81101161		62.00000000	0.55387097	5.03320926	1.346028
63	0.31946000	9.08773040	2.90316635		63.00000000	0.54507937	4.95353432	1.367504
64	0.32928926	9.09494300	2.99486705		64.00000000	0.53656250	4.88000535	1.388889
65	0.33943933	9.08868030	3.08505555		65.00000000	0.52830769	4.80161972	1.410259
66	0.34925446	9.07836720	3.17066023		66.00000000	0.52030303	4.72350196	1.431624
67	0.35939410	9.08419130	3.26480476		67.00000000	0.51253731	4.65598700	1.453100
68	0.36957768	9.08566470	3.35785888		68.00000000	0.50500000	4.58826067	1.474479
69	0.37938014	9.09981920	3.45229068		69.00000000	0.49768116	4.52880857	1.495855
70	0.38952574	9.08897880	3.54039119		70.00000000	0.49057143	4.45879331	1.517206
71	0.39934683	9.07705020	3.62489122		71.00000000	0.48366197	4.39022400	1.538686
72	0.40950730	9.08657460	3.72101863		72.00000000	0.47694444	4.33379127	1.560059
73	0.41931129	9.08242890	3.80836498		73.00000000	0.47041096	4.27247409	1.581446
74	0.42947847	9.09556870	3.90635093		74.00000000	0.46405405	4.22083553	1.602924
75	0.43927723	9.09314060	3.99440961		75.00000000	0.45786667	4.16344598	1.624292
76	0.44942951	9.07593920	4.07899491		76.00000000	0.45184211	4.10089148	1.645660
77	0.45956469	9.08150960	4.17354114		77.00000000	0.44597403	4.05011740	1.667042
78	0.46940958	9.07820320	4.26139555		78.00000000	0.44025641	3.99673715	1.688519
79	0.47956413	9.06292920	4.34625576		79.00000000	0.43468354	3.93950619	1.709919
80	0.48940083	9.06734470	4.43756602		80.00000000	0.42925000	3.89215771	1.731263
81	0.49952412	9.04851910	4.51995354		81.00000000	0.42395062	3.83612526	1.752629
82	0.50934219	9.02377410	4.59618886		82.00000000	0.41878049	3.77898052	1.774117
83	0.51946253	9.03386690	4.69275536		83.00000000	0.41373494	3.73762638	1.795497
84	0.52924937	8.99752710	4.76193555		84.00000000	0.40880952	3.67827477	1.816835
85	0.53940392	8.95866110	4.83233692		85.00000000	0.40400000	3.61929908	1.838220
86	0.54953164	8.89584450	4.88854802		86.00000000	0.39930233	3.55213140	1.859688
87	0.55937356	8.80689620	4.92634488		87.00000000	0.39471264	3.47619328	1.881074
88	0.56948864	8.71742730	4.96447582		88.00000000	0.39022727	3.40177788	1.902423
89	0.57931864	8.53126530	4.94232101		89.00000000	0.38584270	3.29172641	1.923793
90	0.58943224	8.31807900	4.90294394		90.00000000	0.38155556	3.17380925	1.945263
91	0.59925038	7.99077030	4.78847214		91.00000000	0.37736264	3.01541815	1.966631
92	0.60938179	7.56363490	4.60914137		92.00000000	0.37326087	2.82320894	1.988100
93	0.61919469	6.99745370	4.33278617		93.00000000	0.36924731	2.58379097	2.009501
94	0.62930679	6.21947050	3.91395502		94.00000000	0.36531915	2.27209167	2.030997
95	0.63943160	5.20400380	3.32760448		95.00000000	0.36147368	1.88111043	2.052366
96	0.64918792	3.96599940	2.57467890		96.00000000	0.35770833	1.41867104	2.073793
97	0.65930748	2.33566640	1.53992233		97.00000000	0.35402062	0.82687406	2.095163
98	0.66896629	0.41943648	0.28058887		98.00000000	0.35040816	0.14697397	2.116645
99	0.67913121	-1.95634960	-1.32861807		99.00000000	0.34686869	-0.67859642	2.138075
100	0.68881762	-4.67210100	-3.21822549		100.00000000	0.34340000	-1.60439948	2.159455
101	0.69900560	-7.96936040	-5.57062755		101.00000000	0.34000000	-2.70958254	2.180819
00:04 03/04/2018
Test Lot:	JK-PERC
Recipe:	Recipe_YJX-LID
Cell Name:	1-20-2-10min
Test Order:	2
Test Condition:	Light
1	-0.29979390	9.08658220	-2.72410192		1.00000000	34.34000000	312.03323275	0.000000
2	-0.28996140	9.09670540	-2.63769343		2.00000000	17.17000000	156.19043172	0.061814
3	-0.27979988	9.09067250	-2.54356907		3.00000000	11.44666667	104.05789788	0.083251
4	-0.26997554	9.09342480	-2.45500227		4.00000000	8.58500000	78.06705191	0.104762
5	-0.25983638	9.09140870	-2.36227873		5.00000000	6.86800000	62.43979495	0.126131
6	-0.24975003	9.08827780	-2.26979765		6.00000000	5.72333333	52.01524328	0.147487
7	-0.23984309	9.08786200	-2.17966090		7.00000000	4.90571429	44.58245444	0.168855
8	-0.22976568	9.09071250	-2.08873374		8.00000000	4.29250000	39.02188341	0.190331
9	-0.21991901	9.09017180	-1.99910158		9.00000000	3.81555556	34.68405551	0.211712
10	-0.20978430	9.08720300	-1.90635252		10.00000000	3.43400000	31.20545510	0.233063
11	-0.19992648	9.08915040	-1.81716185		11.00000000	3.12181818	28.37467498	0.254439
12	-0.18979548	9.08679960	-1.72463349		12.00000000	2.86166667	26.00339152	0.275916
13	-0.18001358	9.09573750	-1.63735627		13.00000000	2.64153846	24.02674044	0.297303
14	-0.16987365	9.08483030	-1.54327328		14.00000000	2.45285714	22.28379089	0.318660
15	-0.16006868	9.08801750	-1.45470697		15.00000000	2.28933333	20.80550140	0.340019
16	-0.14990419	9.09371470	-1.36318594		16.00000000	2.14625000	19.51738517	0.361505
17	-0.13974491	9.08623700	-1.26975537		17.00000000	2.02000000	18.35419874	0.382953
18	-0.12992504	9.09140010	-1.18120052		18.00000000	1.90777778	17.34437108	0.404324
19	-0.11979330	9.08679770	-1.08853748		19.00000000	1.80736842	16.42319121	0.425701
20	-0.10995855	9.09203430	-0.99974691		20.00000000	1.71700000	15.61102289	0.447184
21	-0.09977992	9.08687590	-0.90668774		21.00000000	1.63523810	14.85920564	0.468570
22	-0.08995782	9.08807090	-0.81754303		22.00000000	1.56090909	14.18565249	0.489947
23	-0.07982831	9.07540130	-0.72447398		23.00000000	1.49304348	13.54996872	0.511293
24	-0.07000026	9.09818080	-0.63687503		24.00000000	1.43083333	13.01798036	0.532770
25	-0.05983801	9.09007840	-0.54393218		25.00000000	1.37360000	12.48613169	0.554148
26	-0.04971074	9.08911040	-0.45182637		26.00000000	1.32076923	12.00461735	0.575535
27	-0.03985961	9.09637640	-0.36257800		27.00000000	1.27185185	11.56924317	0.596940
28	-0.02973382	9.09174540	-0.27033236		28.00000000	1.22642857	11.15037632	0.618408
29	-0.01988940	9.09542560	-0.18090252		29.00000000	1.18413793	10.77023845	0.639771
30	-0.00975766	9.09984110	-0.08879313		30.00000000	1.14466667	10.41628478	0.661122
31	-0.00059131	9.09405990	-0.00537739		31.00000000	1.10774194	10.07387152	0.682612
32	0.00956702	9.09212590	0.08698451		32.00000000	1.07312500	9.75698761	0.704090
33	0.01937841	9.09129140	0.17617481		33.00000000	1.04060606	9.46045293	0.725478
34	0.02950317	9.09252640	0.26825831		34.00000000	1.01000000	9.18345166	0.746847
35	0.03933094	9.08719640	0.35740795		35.00000000	0.98114286	8.91583784	0.768214
36	0.04946239	9.09354110	0.44978823		36.00000000	0.95388889	8.67422782	0.789751
37	0.05930654	9.09041880	0.53912125		37.00000000	0.92810811	8.43689139	0.811128
38	0.06942533	9.09429360	0.63137433		38.00000000	0.90368421	8.21836953	0.832511
39	0.07958432	9.07860760	0.72251484		39.00000000	0.88051282	7.99383038	0.853874
40	0.08936743	9.09645370	0.81292673		40.00000000	0.85850000	7.80930550	0.875358
41	0.09954429	9.08763410	0.90462206		41.00000000	0.83756098	7.61144768	0.896738
42	0.10935271	9.08394050	0.99335351		42.00000000	0.81761905	7.42720278	0.918127
43	0.11949234	9.09130000	1.08634071		43.00000000	0.79860465	7.26035447	0.939613
44	0.12932831	9.08890060	1.17545215		44.00000000	0.78045455	7.09347379	0.960982
45	0.13948059	9.08636380	1.26737138		45.00000000	0.76311111	6.93390518	0.982349
46	0.14930166	9.08865360	1.35695107		46.00000000	0.74652174	6.78487749	1.003715
47	0.15945247	9.09051230	1.44950464		47.00000000	0.73063830	6.64187643	1.025190
48	0.16958839	9.08365060	1.54048168		48.00000000	0.71541667	6.49859503	1.046577
49	0.17942956	9.09545040	1.63199266		49.00000000	0.70081633	6.37424014	1.067929
50	0.18955728	9.08427430	1.72199033		50.00000000	0.68680000	6.23907959	1.089293
51	0.19933444	9.08361530	1.81067737		51.00000000	0.67333333	6.11630097	1.110781
52	0.20948003	9.08165650	1.90242568		52.00000000	0.66038462	5.99738623	1.132155
53	0.21931525	9.09554390	1.99479148		53.00000000	0.64792453	5.89322599	1.153512
54	0.22945862	9.08036610	2.08356827		54.00000000	0.63592593	5.77444022	1.174887
55	0.23930052	9.08272270	2.17350027		55.00000000	0.62436364	5.67092177	1.196353
56	0.24945803	9.08118920	2.26537557		56.00000000	0.61321429	5.56871495	1.217748
57	0.25956938	9.09181400	2.35995652		57.00000000	0.60245614	5.47741917	1.239101
58	0.26940235	9.08478160	2.44746151		58.00000000	0.59206897	5.37881724	1.260479
59	0.27957922	9.09546570	2.54290321		59.00000000	0.58203390	5.29386936	1.281958
60	0.28939581	9.09044740	2.63073739		60.00000000	0.57233333	5.20276606	1.303329
61	0.29953843	9.08009910	2.71983863		61.00000000	0.56295082	5.11164923	1.324675
62	0.30934760	9.08905700	2.81167797		62.00000000	0.55387097	5.03416480	1.346052
63	0.31950361	9.08406730	2.90239230		63.00000000	0.54507937	4.95153764	1.367527
64	0.32933435	9.08920100	2.99338610		64.00000000	0.53656250	4.87692441	1.388898
65	0.33947176	9.08871840	3.08536323		65.00000000	0.52830769	4.80163984	1.410268
66	0.34929657	9.07438660	3.16965211		66.00000000	0.52030303	4.72143085	1.431637
67	0.35944661	9.08598140	3.26592521		67.00000000	0.51253731	4.65690450	1.453104
68	0.36960784	9.08342170	3.35730387		68.00000000	0.50500000	4.58712796	1.474487
69	0.37942296	9.08442120	3.44683798		69.00000000	0.49768116	4.52114528	1.495861
70	0.38957524	9.09012030	3.54128580		70.00000000	0.49057143	4.45935330	1.517213
71	0.39938068	9.08605860	3.62879626		71.00000000	0.48366197	4.39458102	1.538686
72	0.40952778	9.08860490	3.72203619		72.00000000	0.47694444	4.33475961	1.560066
73	0.41934884	9.08913900	3.81151990		73.00000000	0.47041096	4.27563059	1.581461
74	0.42949966	9.08868500	3.90358712		74.00000000	0.46405405	4.21764112	1.602927
75	0.43928128	9.07342050	3.98578377		75.00000000	0.45786667	4.15441680	1.624300
76	0.44947451	9.09320450	4.08716364		76.00000000	0.45184211	4.10869266	1.645663
77	0.45957321	9.07583520	4.17101072		77.00000000	0.44597403	4.04758676	1.667035
78	0.46947020	9.07444000	4.26017916		78.00000000	0.44025641	3.99508038	1.688510
79	0.47961652	9.07906630	4.35447018		79.00000000	0.43468354	3.94652072	1.709892
80	0.48940560	9.06523990	4.43657917		80.00000000	0.42925000	3.89125423	1.731245
81	0.49956608	9.04687500	4.51951188		81.00000000	0.42395062	3.83542824	1.752628
82	0.50938344	9.04238800	4.60604271		82.00000000	0.41878049	3.78677566	1.774104
83	0.51951414	9.02549650	4.68887305		83.00000000	0.41373494	3.73416325	1.795473
84	0.52931732	9.00183580	4.76482760		84.00000000	0.40880952	3.68003621	1.816824
85	0.53943241	8.95696540	4.83167743		85.00000000	0.40400000	3.61861402	1.838189
86	0.54959661	8.88608170	4.88376038		86.00000000	0.39930233	3.54823309	1.859674
87	0.55940878	8.81597900	4.93173606		87.00000000	0.39471264	3.47977838	1.881058
88	0.56954616	8.70307160	4.95680101		88.00000000	0.39022727	3.39617589	1.902400
89	0.57935387	8.54910760	4.95295857		89.00000000	0.38584270	3.29861073	1.923763
90	0.58949345	8.29866500	4.89200866		90.00000000	0.38155556	3.16640173	1.945238
91	0.59931529	8.01359180	4.80266809		91.00000000	0.37736264	3.02403014	1.966629
92	0.60942888	7.56456330	4.61006334		92.00000000	0.37326087	2.82355548	1.988085
93	0.61921424	7.01287080	4.34246946		93.00000000	0.36924731	2.58948369	2.009498
94	0.62932485	6.23007970	3.92074397		94.00000000	0.36531915	2.27596741	2.031023
95	0.63945407	5.21692420	3.33598341		95.00000000	0.36147368	1.88578081	2.052433
96	0.64923269	3.96260880	2.57265517		96.00000000	0.35770833	1.41745819	2.073806
97	0.65932697	2.33587220	1.54010354		97.00000000	0.35402062	0.82694692	2.095167
98	0.66906691	0.42356637	0.28339424		98.00000000	0.35040816	0.14842111	2.116665
99	0.67914850	-1.96708660	-1.33594391		99.00000000	0.34686869	-0.68232075	2.138033
100	0.68886757	-4.68910550	-3.23017271		100.00000000	0.34340000	-1.61023883	2.159410
101	0.69909430	-8.00348470	-5.59519053		101.00000000	0.34000000	-2.72118480	2.180757
00:04 03/04/2018
Test Lot:	JK-PERC
Recipe:	Recipe_YJX-LID
Cell Name:	1-20-2-10min
Test Order:	2
Test Condition:	Light
1	-0.29976118	9.08875370	-2.72445553		1.00000000	34.34000000	312.10780206	0.000000
2	-0.28990260	9.07864380	-2.63192244		2.00000000	17.17000000	155.88031405	0.021585
3	-0.27974778	9.09290410	-2.54371974		3.00000000	11.44666667	104.08344226	0.042975
4	-0.26997256	9.08298300	-2.45215617		4.00000000	8.58500000	77.97740906	0.064340
5	-0.25981998	9.08826260	-2.36131221		5.00000000	6.86800000	62.41818754	0.085770
6	-0.24969421	9.09652330	-2.27134920		6.00000000	5.72333333	52.06243502	0.107256
7	-0.23983787	9.09000020	-2.18012629		7.00000000	4.90571429	44.59294384	0.128652
8	-0.22971879	9.08015060	-2.08588121		8.00000000	4.29250000	38.97654645	0.149995
9	-0.21991232	9.10101410	-2.00142513		9.00000000	3.81555556	34.72542491	0.171372
10	-0.20972922	9.08291630	-1.90495295		10.00000000	3.43400000	31.19073457	0.192857
11	-0.19992872	9.08766560	-1.81688535		11.00000000	3.12181818	28.37003970	0.214233
12	-0.18978208	9.08619020	-1.72439608		12.00000000	2.86166667	26.00164762	0.235588
13	-0.17998976	9.09239290	-1.63653762		13.00000000	2.64153846	24.01790555	0.256961
14	-0.16987514	9.08542440	-1.54338774		14.00000000	2.45285714	22.28524814	0.278434
15	-0.16001880	9.08914090	-1.45443342		15.00000000	2.28933333	20.80807323	0.299819
16	-0.14990270	9.09764290	-1.36376123		16.00000000	2.14625000	19.52581607	0.321160
17	-0.13977095	9.07970330	-1.26907876		17.00000000	2.02000000	18.34100067	0.342529
18	-0.12989303	9.09174920	-1.18095485		18.00000000	1.90777778	17.34503708	0.364010
19	-0.11975683	9.09710600	-1.08944058		19.00000000	1.80736842	16.44182211	0.385372
20	-0.10994143	9.08343700	-0.99864605		20.00000000	1.71700000	15.59626133	0.406729
21	-0.09980523	9.09473130	-0.90770173		21.00000000	1.63523810	14.87205109	0.428108
22	-0.08998015	9.07032300	-0.81614901		22.00000000	1.56090909	14.15794963	0.449587
23	-0.07983948	9.09426210	-0.72608118		23.00000000	1.49304348	13.57812872	0.470980
24	-0.07001589	9.08789730	-0.63629724		24.00000000	1.43083333	13.00326639	0.492355
25	-0.05984173	9.08545110	-0.54368911		25.00000000	1.37360000	12.47977563	0.513697
26	-0.04970776	9.09078120	-0.45188236		26.00000000	1.32076923	12.00682409	0.535182
27	-0.03988640	9.08785920	-0.36248202		27.00000000	1.27185185	11.55841055	0.556546
28	-0.02973159	9.08855340	-0.27021716		28.00000000	1.22642857	11.14646156	0.577940
29	-0.01989609	9.08512020	-0.18075841		29.00000000	1.18413793	10.75803544	0.599340
30	-0.00974352	9.08732510	-0.08854249		30.00000000	1.14466667	10.40195813	0.620814
31	-0.00060471	9.08848670	-0.00549586		31.00000000	1.10774194	10.06769785	0.642302
32	0.00953054	9.08348660	0.08657057		32.00000000	1.07312500	9.74771656	0.663689
33	0.01933524	9.09556580	0.17586498		33.00000000	1.04060606	9.46490090	0.685050
34	0.02951061	9.08589840	0.26813039		34.00000000	1.01000000	9.17675738	0.706541
35	0.03932126	9.08927250	0.35740167		35.00000000	0.98114286	8.91787479	0.727936
36	0.04946909	9.08962440	0.44965542		36.00000000	0.95388889	8.67049172	0.749306
37	0.05931919	9.09213920	0.53933831		37.00000000	0.92810811	8.43848811	0.770683
38	0.06943426	9.08918380	0.63110078		38.00000000	0.90368421	8.21375189	0.792166
39	0.07961186	9.08288760	0.72310558		39.00000000	0.88051282	7.99759898	0.813539
40	0.08941954	9.08652880	0.81251319		40.00000000	0.85850000	7.80078497	0.834935
41	0.09956289	9.09046080	0.90507256		41.00000000	0.83756098	7.61381522	0.856275
42	0.10934750	9.09152030	0.99413502		42.00000000	0.81761905	7.43340017	0.877743
43	0.11951021	9.08237170	1.08543615		43.00000000	0.79860465	7.25322428	0.899130
44	0.12932682	9.06881620	1.17284116		44.00000000	0.78045455	7.07779883	0.920519
45	0.13949697	9.10754110	1.27047439		45.00000000	0.76311111	6.95006581	0.942002
46	0.14931507	9.09042070	1.35733680		46.00000000	0.74652174	6.78619667	0.963387
47	0.15944652	9.07958030	1.44770748		47.00000000	0.73063830	6.63388910	0.984738
48	0.16959508	9.09348960	1.54221110		48.00000000	0.71541667	6.50563402	1.006100
49	0.17944072	9.07342050	1.62814111		49.00000000	0.70081633	6.35880122	1.027588
50	0.18956250	9.09854410	1.72474277		50.00000000	0.68680000	6.24888009	1.048957
51	0.19932626	9.08528420	1.81093572		51.00000000	0.67333333	6.11742469	1.070307
52	0.20948674	9.08198640	1.90255572		52.00000000	0.66038462	5.99760410	1.091689
53	0.21934001	9.08918480	1.99362188		53.00000000	0.64792453	5.88910577	1.113164
54	0.22944826	9.08472250	2.08447377		54.00000000	0.63592593	5.77721057	1.174791
55	0.23932429	9.07751370	2.17246952		55.00000000	0.62436364	5.66766946	1.196280
56	0.24946156	9.09063720	2.26776454		56.00000000	0.61321429	5.57450860	1.217666
57	0.25961521	9.08241940	2.35793422		57.00000000	0.60245614	5.47175934	1.239007
58	0.26943690	9.08763310	2.44854369		58.00000000	0.59206897	5.38050553	1.260387
59	0.27959278	9.08704380	2.54067184		59.00000000	0.58203390	5.28896753	1.281870
60	0.28941077	9.09170150	2.63123633		60.00000000	0.57233333	5.20348383	1.303255
61	0.29954877	9.10123060	2.72626243		61.00000000	0.56295082	5.12354523	1.324628
62	0.30938014	9.07595830	2.80792125		62.00000000	0.55387097	5.02690981	1.346006
63	0.31951445	9.08773800	2.90366361		63.00000000	0.54507937	4.95353846	1.367488
64	0.32934731	9.08054070	2.99065165		64.00000000	0.53656250	4.87227762	1.388872
65	0.33950093	9.09041690	3.08620499		65.00000000	0.52830769	4.80253717	1.410229
66	0.34929585	9.07483480	3.16980214		66.00000000	0.52030303	4.72166405	1.431735
67	0.35945100	9.09917260	3.27070669		67.00000000	0.51253731	4.66366548	1.453240
68	0.36960834	9.08784480	3.35894323		68.00000000	0.50500000	4.58936162	1.474619
69	0.37941441	9.08116340	3.44552425		69.00000000	0.49768116	4.51952393	1.495992
70	0.38957849	9.08339410	3.53869496		70.00000000	0.49057143	4.45605362	1.517367
71	0.39940688	9.08644960	3.62919049		71.00000000	0.48366197	4.39477013	1.538851
72	0.40954116	9.08629320	3.72121106		72.00000000	0.47694444	4.33365706	1.560242
73	0.41935542	9.08126160	3.80827627		73.00000000	0.47041096	4.27192498	1.581635
74	0.42950535	9.08786870	3.90328823		74.00000000	0.46405405	4.21726231	1.602971
75	0.43930992	9.08359150	3.99051186		75.00000000	0.45786667	4.15907376	1.624440
76	0.44945240	9.08778190	4.08452539		76.00000000	0.45184211	4.10624251	1.645827
77	0.45962319	9.07702260	4.17201008		77.00000000	0.44597403	4.04811631	1.667211
78	0.46949697	9.07749370	4.26185579		78.00000000	0.44025641	3.99642479	1.688692
79	0.47960448	9.08585260	4.35761561		79.00000000	0.43468354	3.94947061	1.710063
80	0.48941797	9.05389120	4.43113705		80.00000000	0.42925000	3.88638280	1.731427
81	0.49957684	9.05068400	4.52151211		81.00000000	0.42395062	3.83704307	1.752809
82	0.50939780	9.04651550	4.60827509		82.00000000	0.41878049	3.78850417	1.774285
83	0.51954174	9.02354720	4.68810941		83.00000000	0.41373494	3.73335676	1.795680
84	0.52932775	8.99732210	4.76253226		84.00000000	0.40880952	3.67819096	1.817030
85	0.53946126	8.95869060	4.83286652		85.00000000	0.40400000	3.61931100	1.838412
86	0.54957402	8.89893050	4.89062101		86.00000000	0.39930233	3.55336364	1.859903
87	0.55941278	8.80712130	4.92681621		87.00000000	0.39471264	3.47628213	1.881271
88	0.56955755	8.69170480	4.95042609		88.00000000	0.39022727	3.39174026	1.902631
89	0.57938069	8.53588960	4.94552961		89.00000000	0.38584270	3.29351066	1.924019
90	0.58947408	8.31488900	4.90141154		90.00000000	0.38155556	3.17259209	1.945491
91	0.59930319	7.99044470	4.78869900		91.00000000	0.37736264	3.01529529	1.966863
92	0.60940474	7.55415110	4.60353549		92.00000000	0.37326087	2.81966901	1.988343
93	0.61924130	6.99421830	4.33110883		93.00000000	0.36924731	2.58259631	2.009744
94	0.62935030	6.21362500	3.91054676		94.00000000	0.36531915	2.26995620	2.031242
95	0.63946676	5.19905420	3.32462234		95.00000000	0.36147368	1.87932128	2.052616
96	0.64923412	3.94659350	2.56226316		96.00000000	0.35770833	1.41172938	2.074017
97	0.65934235	2.33316660	1.53835555		97.00000000	0.35402062	0.82598908	2.095407
98	0.66907173	0.40564594	0.27140623		98.00000000	0.35040816	0.14214165	2.116909
99	0.67915547	-1.97265090	-1.33973665		99.00000000	0.34686869	-0.68425083	2.138273
100	0.68886179	-4.69024560	-3.23093098		100.00000000	0.34340000	-1.61063034	2.159652
101	0.69907051	-8.00788780	-5.59807821		101.00000000	0.34000000	-2.72268185	2.181017
