# Supplementary material for: Study on the Electrical Injection Regeneration of Industrialized B-Doped Czochralski Silicon PERC Solar Cells
Source: Hindawi journal article supplement (doi:10.1155/2019/5357370), 2019-06-20
Supplement: f1 [file 5357370.f1.zip › section3.1/IVRawData_1-20-2-20min.csv]

00:16 03/04/2018
Test Lot:	JK-PERC
Recipe:	Recipe_YJX-LID
Cell Name:	1-20-2-20min
Test Order:	2
Test Condition:	Light
1	-0.29981908	9.09044080	-2.72548760		1.00000000	34.34000000	312.16573707	0.000000
2	-0.29003149	9.08623030	-2.63529291		2.00000000	17.17000000	156.01057425	0.061780
3	-0.27985319	9.08482840	-2.54241821		3.00000000	11.44666667	103.99100242	0.083197
4	-0.27005520	9.09514710	-2.45619177		4.00000000	8.58500000	78.08183785	0.104723
5	-0.25985900	9.08727170	-2.36140934		5.00000000	6.86800000	62.41138204	0.126113
6	-0.24974023	9.08522700	-2.26894668		6.00000000	5.72333333	51.99778253	0.147479
7	-0.23989981	9.08674910	-2.17990938		7.00000000	4.90571429	44.57699487	0.168862
8	-0.22976391	9.08423610	-2.08722961		8.00000000	4.29250000	38.99408346	0.190355
9	-0.21993169	9.08276080	-1.99758693		9.00000000	3.81555556	34.65577843	0.211740
10	-0.20979579	9.07633210	-1.90417626		10.00000000	3.43400000	31.16812443	0.233102
11	-0.19999409	9.08314800	-1.81657592		11.00000000	3.12181818	28.35593657	0.254472
12	-0.18982470	9.08177470	-1.72394516		12.00000000	2.86166667	25.98901193	0.275950
13	-0.18003415	9.08402920	-1.63543548		13.00000000	2.64153846	23.99581252	0.297326
14	-0.16985285	9.08188630	-1.54258427		14.00000000	2.45285714	22.27656968	0.318678
15	-0.16005114	9.08535580	-1.45412155		15.00000000	2.28933333	20.79940788	0.340060
16	-0.14986984	9.08009720	-1.36083271		16.00000000	2.14625000	19.48815862	0.361536
17	-0.13978603	9.09266850	-1.27102803		17.00000000	2.02000000	18.36719037	0.382914
18	-0.12993075	9.06922630	-1.17837138		18.00000000	1.90777778	17.30206840	0.404248
19	-0.11976358	9.08938410	-1.08857718		19.00000000	1.80736842	16.42786579	0.425616
20	-0.10992540	9.08739190	-0.99893519		20.00000000	1.71700000	15.60305189	0.447089
21	-0.09978430	9.08003040	-0.90604448		21.00000000	1.63523810	14.84801162	0.468458
22	-0.08997068	9.08000560	-0.81693426		22.00000000	1.56090909	14.17306329	0.489806
23	-0.07981618	9.08180140	-0.72487467		23.00000000	1.49304348	13.55952435	0.511180
24	-0.07004126	9.09362130	-0.63692871		24.00000000	1.43083333	13.01145648	0.532663
25	-0.05986219	9.07883930	-0.54347923		25.00000000	1.37360000	12.47069366	0.554035
26	-0.04974118	9.08655260	-0.45197584		26.00000000	1.32076923	12.00123909	0.575399
27	-0.03995436	9.08468820	-0.36297288		27.00000000	1.27185185	11.55437751	0.596773
28	-0.02975966	9.07957460	-0.27020504		28.00000000	1.22642857	11.13544971	0.618310
29	-0.01994158	9.08921240	-0.18125324		29.00000000	1.18413793	10.76288117	0.639699
30	-0.00979228	9.08199980	-0.08893349		30.00000000	1.14466667	10.39586244	0.661077
31	-0.00062174	9.08546070	-0.00564880		31.00000000	1.10774194	10.06434582	0.682542
32	0.00952958	9.08782390	0.08660315		32.00000000	1.07312500	9.75237102	0.704026
33	0.01932729	9.07523920	0.17539975		33.00000000	1.04060606	9.44374891	0.725411
34	0.02945322	9.08589650	0.26760893		34.00000000	1.01000000	9.17675547	0.746804
35	0.03929931	9.07938290	0.35681345		35.00000000	0.98114286	8.90817168	0.768284
36	0.04943938	9.08491520	0.44915259		36.00000000	0.95388889	8.66599967	0.789657
37	0.05923337	9.08578300	0.53818152		37.00000000	0.92810811	8.43258887	0.811009
38	0.06940247	9.06791500	0.62933571		38.00000000	0.90368421	8.19453161	0.832381
39	0.07954180	9.09417720	0.72336724		39.00000000	0.88051282	8.00753962	0.853883
40	0.08935663	9.06410500	0.80993789		40.00000000	0.85850000	7.78153414	0.875260
41	0.09951382	9.08137230	0.90372206		41.00000000	0.83756098	7.60620304	0.896607
42	0.10930632	9.08185770	0.99270444		42.00000000	0.81761905	7.42549984	0.917970
43	0.11951710	9.08795550	1.08616609		43.00000000	0.79860465	7.25768353	0.939447
44	0.12933193	9.07364560	1.17351210		44.00000000	0.78045455	7.08156795	0.960838
45	0.13945638	9.09399510	1.26821564		45.00000000	0.76311111	6.93972871	0.982195
46	0.14928088	9.07798480	1.35516956		46.00000000	0.74652174	6.77691300	1.003568
47	0.15946932	9.09250640	1.44997581		47.00000000	0.73063830	6.64333340	1.025044
48	0.16955656	9.08481980	1.54039079		48.00000000	0.71541667	6.49943150	1.046429
49	0.17944805	9.07944490	1.62928868		49.00000000	0.70081633	6.36302322	1.067776
50	0.18953975	9.07678600	1.72041175		50.00000000	0.68680000	6.23393662	1.089154
51	0.19936648	9.08102040	1.81045107		51.00000000	0.67333333	6.11455374	1.110645
52	0.20954973	9.08842660	1.90447734		52.00000000	0.66038462	6.00185710	1.132027
53	0.21934967	9.07989880	1.99167281		53.00000000	0.64792453	5.88308915	1.153369
54	0.22944658	9.07447150	2.08210645		54.00000000	0.63592593	5.77069169	1.174753
55	0.23928671	9.07969190	2.17264960		55.00000000	0.62436364	5.66902945	1.196227
56	0.24942975	9.07684610	2.26403545		56.00000000	0.61321429	5.56605170	1.217629
57	0.25957951	9.08766170	2.35897077		57.00000000	0.60245614	5.47491759	1.239010
58	0.26943153	9.07681940	2.44558134		58.00000000	0.59206897	5.37410307	1.260369
59	0.27956492	9.08316140	2.53933329		59.00000000	0.58203390	5.28670784	1.281841
60	0.28938645	9.07756040	2.62692298		60.00000000	0.57233333	5.19539040	1.303211
61	0.29953843	9.08991530	2.72277896		61.00000000	0.56295082	5.11717527	1.324592
62	0.30931678	9.07778450	2.80791107		62.00000000	0.55387097	5.02792129	1.345948
63	0.31946728	9.09276870	2.90484208		63.00000000	0.54507937	4.95628059	1.367430
64	0.32927242	9.07405090	2.98783470		64.00000000	0.53656250	4.86879544	1.388806
65	0.33946311	9.07194520	3.07959073		65.00000000	0.52830769	4.79277843	1.410196
66	0.34927347	9.09558870	3.17684783		66.00000000	0.52030303	4.73246236	1.431678
67	0.35939643	9.07377240	3.26108141		67.00000000	0.51253731	4.65064693	1.453055
68	0.36958712	9.09266660	3.36053246		68.00000000	0.50500000	4.59179663	1.474424
69	0.37938187	9.06487270	3.43904836		69.00000000	0.49768116	4.51141636	1.495800
70	0.38956138	9.09546380	3.54324143		70.00000000	0.49057143	4.46197467	1.517279
71	0.39937323	9.07837680	3.62566067		71.00000000	0.48366197	4.39086562	1.538660
72	0.40949768	9.07400610	3.71578445		72.00000000	0.47694444	4.32779680	1.560005
73	0.41933557	9.07277970	3.80453925		73.00000000	0.47041096	4.26793500	1.581380
74	0.42946449	9.09425070	3.90565774		74.00000000	0.46405405	4.22022391	1.602862
75	0.43928748	9.06223390	3.98092589		75.00000000	0.45786667	4.14929483	1.624241
76	0.44947147	9.08192630	4.08206676		76.00000000	0.45184211	4.10359670	1.645606
77	0.45960411	9.07708640	4.17186622		77.00000000	0.44597403	4.04814477	1.666975
78	0.46945542	9.05531690	4.25106760		78.00000000	0.44025641	3.98666131	1.688453
79	0.47956645	9.06438160	4.34697331		79.00000000	0.43468354	3.94013752	1.709841
80	0.48937383	9.06627940	4.43679987		80.00000000	0.42925000	3.89170043	1.731201
81	0.49953252	9.05638980	4.52396122		81.00000000	0.42395062	3.83946205	1.752571
82	0.50935030	9.03087710	4.59987996		82.00000000	0.41878049	3.78195512	1.774048
83	0.51952463	9.01604750	4.68405874		83.00000000	0.41373494	3.73025387	1.795421
84	0.52928287	8.98438640	4.75528182		84.00000000	0.40880952	3.67290273	1.816761
85	0.53940511	8.94333170	4.82407882		85.00000000	0.40400000	3.61310601	1.838149
86	0.54957646	8.88598730	4.88352944		86.00000000	0.39930233	3.54819539	1.859630
87	0.55939949	8.80414010	4.92503148		87.00000000	0.39471264	3.47510541	1.881010
88	0.56954700	8.68917080	4.94889116		88.00000000	0.39022727	3.39075142	1.902369
89	0.57936406	8.53201580	4.94314331		89.00000000	0.38584270	3.29201598	1.923733
90	0.58947879	8.29735660	4.89111573		90.00000000	0.38155556	3.16590251	1.945201
91	0.59930849	7.97762350	4.78105749		91.00000000	0.37736264	3.01045704	1.966631
92	0.60941213	7.54120540	4.59570205		92.00000000	0.37326087	2.81483689	1.988110
93	0.61920536	6.97598840	4.31956941		93.00000000	0.36924731	2.57586496	2.009496
94	0.62931639	6.19290070	3.89729391		94.00000000	0.36531915	2.26238521	2.030995
95	0.63941032	5.18070790	3.31259810		95.00000000	0.36147368	1.87268957	2.052376
96	0.64921176	3.91830440	2.54380930		96.00000000	0.35770833	1.40161014	2.073769
97	0.65933025	2.31944870	1.52928269		97.00000000	0.35402062	0.82113266	2.095276
98	0.66907811	0.39223412	0.26243526		98.00000000	0.35040816	0.13744204	2.116668
99	0.67911023	-1.96618200	-1.33525431		99.00000000	0.34686869	-0.68200697	2.138030
100	0.68876654	-4.66365100	-3.21216676		100.00000000	0.34340000	-1.60149775	2.159406
101	0.69901824	-7.94076160	-5.55073720		101.00000000	0.34000000	-2.69985894	2.180893
00:16 03/04/2018
Test Lot:	JK-PERC
Recipe:	Recipe_YJX-LID
Cell Name:	1-20-2-20min
Test Order:	3
Test Condition:	Light
1	-0.29981238	9.06697560	-2.71839153		1.00000000	34.34000000	311.35994210	0.000000
2	-0.28991020	9.09186740	-2.63582510		2.00000000	17.17000000	156.10736326	0.021587
3	-0.27981970	9.08022880	-2.54082690		3.00000000	11.44666667	103.93835233	0.042992
4	-0.27000904	9.08342170	-2.45260597		4.00000000	8.58500000	77.98117529	0.064343
5	-0.25987315	9.07380770	-2.35803899		5.00000000	6.86800000	62.31891128	0.085719
6	-0.24975139	9.07574650	-2.26668030		6.00000000	5.72333333	51.94352247	0.107222
7	-0.23993033	9.08949470	-2.18084546		7.00000000	4.90571429	44.59046400	0.128587
8	-0.22980039	9.07806110	-2.08614198		8.00000000	4.29250000	38.96757727	0.149923
9	-0.21993765	9.09037590	-1.99931591		9.00000000	3.81555556	34.68483427	0.171306
10	-0.20977272	9.08055780	-1.90485331		10.00000000	3.43400000	31.18263549	0.192781
11	-0.19998442	9.08420940	-1.81670035		11.00000000	3.12181818	28.35925007	0.214207
12	-0.18986340	9.08202170	-1.72434352		12.00000000	2.86166667	25.98971876	0.235619
13	-0.18007211	9.09108830	-1.63705145		13.00000000	2.64153846	24.01445940	0.257011
14	-0.16993621	9.07440850	-1.54207059		14.00000000	2.45285714	22.25822771	0.278493
15	-0.16006602	9.08247850	-1.45379619		15.00000000	2.28933333	20.79282078	0.299872
16	-0.14993384	9.07713700	-1.36097001		16.00000000	2.14625000	19.48180529	0.321231
17	-0.13978307	9.08391190	-1.26977709		17.00000000	2.02000000	18.34950204	0.342600
18	-0.12997317	9.09026530	-1.18149060		18.00000000	1.90777778	17.34220613	0.364079
19	-0.11983801	9.07410810	-1.08742306		19.00000000	1.80736842	16.40025643	0.385441
20	-0.10999239	9.08214860	-0.99896723		20.00000000	1.71700000	15.59404915	0.406825
21	-0.09980365	9.08194830	-0.90641158		21.00000000	1.63523810	14.85114784	0.428170
22	-0.09001906	9.07820510	-0.81721151		22.00000000	1.56090909	14.17025287	0.449640
23	-0.07984521	9.08456130	-0.72535866		23.00000000	1.49304348	13.56364500	0.471033
24	-0.07003531	9.08135220	-0.63601531		24.00000000	1.43083333	12.99390144	0.492424
25	-0.05991132	9.08384230	-0.54422496		25.00000000	1.37360000	12.47756578	0.513899
26	-0.04972853	9.08673950	-0.45187018		26.00000000	1.32076923	12.00148594	0.535284
27	-0.03994468	9.09926890	-0.36346740		27.00000000	1.27185185	11.57292200	0.556626
28	-0.02975371	9.06706710	-0.26977884		28.00000000	1.22642857	11.12011015	0.578000
29	-0.01994530	9.10159210	-0.18153398		29.00000000	1.18413793	10.77754044	0.599469
30	-0.00982056	9.07555290	-0.08912705		30.00000000	1.14466667	10.38848289	0.620847
31	-0.00061132	9.07855890	-0.00554991		31.00000000	1.10774194	10.05670041	0.642329
32	0.00956158	9.08288100	0.08684673		32.00000000	1.07312500	9.74706667	0.663704
33	0.01937790	9.08566280	0.17606105		33.00000000	1.04060606	9.45459577	0.685170
34	0.02950086	9.06104280	0.26730851		34.00000000	1.01000000	9.15165323	0.706556
35	0.03931196	9.10535530	0.35794936		35.00000000	0.98114286	8.93365431	0.727904
36	0.04945427	9.07147310	0.44862306		36.00000000	0.95388889	8.65317740	0.749286
37	0.05929961	9.09304710	0.53921416		37.00000000	0.92810811	8.43933074	0.770773
38	0.06944341	9.06560520	0.62954649		38.00000000	0.90368421	8.19244428	0.792141
39	0.07954925	9.08064940	0.72235881		39.00000000	0.88051282	7.99562822	0.813492
40	0.08938119	9.06527140	0.81026473		40.00000000	0.85850000	7.78253550	0.834869
41	0.09953169	9.09968760	0.90570727		41.00000000	0.83756098	7.62154322	0.856344
42	0.10932492	9.07739350	0.99238532		42.00000000	0.81761905	7.42184983	0.877733
43	0.11950966	9.07980160	1.08512400		43.00000000	0.79860465	7.25117179	0.899075
44	0.12934607	9.08085630	1.17457307		44.00000000	0.78045455	7.08719558	0.920447
45	0.13944669	9.07329850	1.26524144		45.00000000	0.76311111	6.92393490	0.941921
46	0.14927715	9.08057980	1.35552307		46.00000000	0.74652174	6.77885022	0.963298
47	0.15941574	9.08663940	1.44855334		47.00000000	0.73063830	6.63904674	0.984670
48	0.16958112	9.07526970	1.53899440		48.00000000	0.71541667	6.49259920	1.006050
49	0.17939371	9.08014580	1.62892104		49.00000000	0.70081633	6.36351442	1.027531
50	0.18956728	9.09182550	1.72351263		50.00000000	0.68680000	6.24426575	1.048902
51	0.19933000	9.08827780	1.81156641		51.00000000	0.67333333	6.11944039	1.070293
52	0.20946933	9.08585170	1.90320727		52.00000000	0.66038462	6.00015668	1.091640
53	0.21928491	9.07786270	1.99063831		53.00000000	0.64792453	5.88176991	1.113106
54	0.22943838	9.08897210	2.08535903		54.00000000	0.63592593	5.77991300	1.134494
55	0.23926884	9.07615380	2.17164079		55.00000000	0.62436364	5.66682039	1.155878
56	0.24944612	9.09640980	2.26906413		56.00000000	0.61321429	5.57804844	1.177355
57	0.25956386	9.07730010	2.35613905		57.00000000	0.60245614	5.46867518	1.198730
58	0.26945016	9.08382890	2.44763915		58.00000000	0.59206897	5.37825318	1.220076
59	0.27954707	9.08773040	2.54044841		59.00000000	0.58203390	5.28936715	1.241463
60	0.28934029	9.08233360	2.62788504		60.00000000	0.57233333	5.19812226	1.262938
61	0.29950196	9.08011910	2.71951347		61.00000000	0.56295082	5.11166049	1.284312
62	0.30933836	9.08761500	2.81114792		62.00000000	0.55387097	5.03336611	1.305674
63	0.31946728	9.07336330	2.89864269		63.00000000	0.54507937	4.94570311	1.327046
64	0.32929847	9.07335380	2.98784152		64.00000000	0.53656250	4.86842140	1.348523
65	0.33942962	9.09380340	3.08670623		65.00000000	0.52830769	4.80432629	1.369927
66	0.34928465	9.07771780	3.17070748		66.00000000	0.52030303	4.72316408	1.391281
67	0.35943961	9.08763890	3.26645738		67.00000000	0.51253731	4.65775403	1.412651
68	0.36959457	9.07603840	3.35445451		68.00000000	0.50500000	4.58339939	1.434139
69	0.37938705	9.08126070	3.44531271		69.00000000	0.49768116	4.51957235	1.455508
70	0.38951671	9.07911970	3.53646884		70.00000000	0.49057143	4.45395672	1.476875
71	0.39934644	9.08205130	3.62688485		71.00000000	0.48366197	4.39264284	1.498255
72	0.40949321	9.07148650	3.71471213		72.00000000	0.47694444	4.32659509	1.519730
73	0.41934448	9.08137230	3.80822334		73.00000000	0.47041096	4.27197705	1.541122
74	0.42943916	9.07532790	3.89730119		74.00000000	0.46405405	4.21144270	1.562466
75	0.43929195	9.07817840	3.98797069		75.00000000	0.45786667	4.15659528	1.583876
76	0.44945437	9.07275300	4.07778848		76.00000000	0.45184211	4.09945182	1.605368
77	0.45953339	9.07123570	4.16853569		77.00000000	0.44597403	4.04553551	1.626732
78	0.46940851	9.07349400	4.25917530		78.00000000	0.44025641	3.99466390	1.648091
79	0.47955453	9.05894470	4.34425797		79.00000000	0.43468354	3.93777419	1.669459
80	0.48938799	9.06205560	4.43486118		80.00000000	0.42925000	3.88988737	1.690937
81	0.49954963	9.05651190	4.52417717		81.00000000	0.42395062	3.83951381	1.712313
82	0.50933248	9.02575680	4.59711109		82.00000000	0.41878049	3.77981084	1.733707
83	0.51948744	9.01847740	4.68498574		83.00000000	0.41373494	3.73125920	1.755057
84	0.52927101	8.98247430	4.75416325		84.00000000	0.40880952	3.67212104	1.776533
85	0.53941703	8.94393060	4.82450848		85.00000000	0.40400000	3.61334796	1.797917
86	0.54953551	8.87308600	4.87607584		86.00000000	0.39930233	3.54304387	1.819298
87	0.55940241	8.80400660	4.92498251		87.00000000	0.39471264	3.47505272	1.840778
88	0.56949490	8.67574020	4.94078980		88.00000000	0.39022727	3.38551044	1.862165
89	0.57931936	8.50734900	4.92847198		89.00000000	0.38584270	3.28249848	1.883504
90	0.58946246	8.28474520	4.88354629		90.00000000	0.38155556	3.16109056	1.904886
91	0.59923929	7.97542720	4.77918933		91.00000000	0.37736264	3.00962824	1.926358
92	0.60935110	7.52988670	4.58834474		92.00000000	0.37326087	2.81061206	1.947736
93	0.61918676	6.94170570	4.29821226		93.00000000	0.36924731	2.56320617	1.969103
94	0.62929034	6.17633250	3.88670638		94.00000000	0.36531915	2.25633253	1.990574
95	0.63941109	5.14633610	3.29062438		95.00000000	0.36147368	1.86026507	2.012082
96	0.64918202	3.90546150	2.53535539		96.00000000	0.35770833	1.39701612	2.033465
97	0.65929973	2.29756380	1.51478319		97.00000000	0.35402062	0.81338496	2.054802
98	0.66899920	0.39612415	0.26500674		98.00000000	0.35040816	0.13880514	2.076184
99	0.67907453	-1.95419630	-1.32704493		99.00000000	0.34686869	-0.67784950	2.097670
100	0.68883574	-4.61387920	-3.17820489		100.00000000	0.34340000	-1.58440612	2.119054
101	0.69906664	-7.85205270	-5.48910810		101.00000000	0.34000000	-2.66969792	2.140417
00:16 03/04/2018
Test Lot:	JK-PERC
Recipe:	Recipe_YJX-LID
Cell Name:	1-20-2-20min
Test Order:	4
Test Condition:	Light
1	-0.29980943	9.08357620	-2.72334180		1.00000000	34.34000000	311.93000671	0.000000
2	-0.29004923	9.07764150	-2.63296293		2.00000000	17.17000000	155.86310456	0.061797
3	-0.27987218	9.07511520	-2.53987227		3.00000000	11.44666667	103.87981866	0.083227
4	-0.27007845	9.08096790	-2.45257373		4.00000000	8.58500000	77.96010942	0.104720
5	-0.25988504	9.08932690	-2.36218008		5.00000000	6.86800000	62.42549715	0.126107
6	-0.24972811	9.08154680	-2.26791752		6.00000000	5.72333333	51.97671952	0.147455
7	-0.23990016	9.07784840	-2.17777728		7.00000000	4.90571429	44.53333058	0.168834
8	-0.22982435	9.08493610	-2.08793953		8.00000000	4.29250000	38.99708821	0.190318
9	-0.21993685	9.09065150	-1.99936926		9.00000000	3.81555556	34.68588583	0.211702
10	-0.20983796	9.08760930	-1.90692540		10.00000000	3.43400000	31.20685034	0.233141
11	-0.19999959	9.08592410	-1.81718109		11.00000000	3.12181818	28.36460305	0.254499
12	-0.18981883	9.07608320	-1.72281149		12.00000000	2.86166667	25.97272476	0.275979
13	-0.18009359	9.08333870	-1.63585108		13.00000000	2.64153846	23.99398854	0.297353
14	-0.16992028	9.08459570	-1.54365705		14.00000000	2.45285714	22.28321545	0.318737
15	-0.16014814	9.08493420	-1.45493531		15.00000000	2.28933333	20.79844270	0.340150
16	-0.14994729	9.08905120	-1.36287860		16.00000000	2.14625000	19.50737614	0.361620
17	-0.13980524	9.07610610	-1.26888719		17.00000000	2.02000000	18.33373432	0.382988
18	-0.12997729	9.08737090	-1.18115184		18.00000000	1.90777778	17.33668426	0.404364
19	-0.11983597	9.08279320	-1.08844533		19.00000000	1.80736842	16.41595360	0.425727
20	-0.10998197	9.08691500	-0.99939681		20.00000000	1.71700000	15.60223306	0.447217
21	-0.09980866	9.07644180	-0.90590746		21.00000000	1.63523810	14.84214340	0.468618
22	-0.09002610	9.07182120	-0.81670071		22.00000000	1.56090909	14.16028818	0.489991
23	-0.07988777	9.09102060	-0.72626136		23.00000000	1.49304348	13.57328902	0.511351
24	-0.07011192	9.07278730	-0.63611049		24.00000000	1.43083333	12.98164650	0.532848
25	-0.05991032	9.07927510	-0.54394224		25.00000000	1.37360000	12.47129228	0.554227
26	-0.04974817	9.08310890	-0.45186802		26.00000000	1.32076923	11.99669075	0.575621
27	-0.03992840	9.08706860	-0.36283210		27.00000000	1.27185185	11.55740503	0.596955
28	-0.02977220	9.07483670	-0.27017788		28.00000000	1.22642857	11.12963901	0.618433
29	-0.01993308	9.08396150	-0.18107137		29.00000000	1.18413793	10.75666338	0.639812
30	-0.00979922	9.08419990	-0.08901805		30.00000000	1.14466667	10.39838082	0.661189
31	-0.00063817	9.07883170	-0.00579385		31.00000000	1.10774194	10.05700260	0.682786
32	0.00951410	9.08531860	0.08643859		32.00000000	1.07312500	9.74968252	0.704178
33	0.01929116	9.07613950	0.17508923		33.00000000	1.04060606	9.44468577	0.725535
34	0.02947609	9.08535860	0.26780086		34.00000000	1.01000000	9.17621219	0.746914
35	0.03928367	9.08564570	0.35691751		35.00000000	0.98114286	8.91431638	0.768401
36	0.04940757	9.09171960	0.44919979		36.00000000	0.95388889	8.67249031	0.789776
37	0.05921068	9.07707790	0.53745999		37.00000000	0.92810811	8.42450960	0.811118
38	0.06939934	9.08874800	0.63075313		38.00000000	0.90368421	8.21335806	0.832500
39	0.07955971	9.07655720	0.72212829		39.00000000	0.88051282	7.99202498	0.854005
40	0.08932114	9.08987900	0.81191839		40.00000000	0.85850000	7.80366112	0.875401
41	0.09946588	9.08411500	0.90355953		41.00000000	0.83756098	7.60850022	0.896756
42	0.10932557	9.08594230	0.99332582		42.00000000	0.81761905	7.42883949	0.918130
43	0.11943533	9.08821870	1.08545440		43.00000000	0.79860465	7.25789372	0.939608
44	0.12928012	9.08729270	1.17480629		44.00000000	0.78045455	7.09221889	0.960984
45	0.13945687	9.06750680	1.26452612		45.00000000	0.76311111	6.91951519	0.982340
46	0.14928305	9.09440520	1.35764055		46.00000000	0.74652174	6.78917119	1.003722
47	0.15938462	9.08050540	1.44729290		47.00000000	0.73063830	6.63456501	1.025206
48	0.16951820	9.07889370	1.53903772		48.00000000	0.71541667	6.49519187	1.046573
49	0.17942478	9.09200000	1.63133010		49.00000000	0.70081633	6.37182204	1.067932
50	0.18951146	9.07860660	1.72049999		50.00000000	0.68680000	6.23518701	1.089312
51	0.19932202	9.08431340	1.81070370		51.00000000	0.67333333	6.11677102	1.110790
52	0.20945261	9.06797410	1.89931084		52.00000000	0.66038462	5.98835059	1.132178
53	0.21930857	9.09289650	1.99415013		53.00000000	0.64792453	5.89151068	1.153542
54	0.22940047	9.08770470	2.08472373		54.00000000	0.63592593	5.77910703	1.174909
55	0.23923558	9.07012840	2.16989743		55.00000000	0.62436364	5.66305835	1.196388
56	0.24940787	9.07332130	2.26295774		56.00000000	0.61321429	5.56389024	1.217790
57	0.25953996	9.07921700	2.35641962		57.00000000	0.60245614	5.46983003	1.239186
58	0.26934901	9.09612560	2.45003243		58.00000000	0.59206897	5.38553367	1.260527
59	0.27951089	9.06798460	2.53460045		59.00000000	0.58203390	5.27787443	1.282004
60	0.28935197	9.08840560	2.62974806		60.00000000	0.57233333	5.20159747	1.303392
61	0.29951084	9.07833580	2.71905998		61.00000000	0.56295082	5.11065658	1.324795
62	0.30930129	9.07802580	2.80784509		62.00000000	0.55387097	5.02805494	1.346306
63	0.31945422	9.07290080	2.89837645		63.00000000	0.54507937	4.94545101	1.367709
64	0.32927519	9.07599260	2.98849919		64.00000000	0.53656250	4.86983728	1.389052
65	0.33939388	9.06850340	3.07779455		65.00000000	0.52830769	4.79096010	1.410425
66	0.34927517	9.08885290	3.17451064		66.00000000	0.52030303	4.72895771	1.431905
67	0.35938045	9.06964110	3.25945170		67.00000000	0.51253731	4.64852948	1.453290
68	0.36955869	9.07976250	3.35550514		68.00000000	0.50500000	4.58528006	1.474660
69	0.37937668	9.07859610	3.44420765		69.00000000	0.49768116	4.51824623	1.496034
70	0.38955045	9.08428190	3.53878610		70.00000000	0.49057143	4.45648915	1.517519
71	0.39936101	9.07904530	3.62581670		71.00000000	0.48366197	4.39118895	1.538902
72	0.40947598	9.07567410	3.71627055		72.00000000	0.47694444	4.32859234	1.560244
73	0.41929322	9.08302500	3.80845080		73.00000000	0.47041096	4.27275450	1.581618
74	0.42947072	9.07584290	3.89780878		74.00000000	0.46405405	4.21168169	1.603090
75	0.43925896	9.07031250	3.98421604		75.00000000	0.45786667	4.15299375	1.624490
76	0.44943124	9.07954880	4.08063288		76.00000000	0.45184211	4.10252244	1.645832
77	0.45960128	9.07919690	4.17281052		77.00000000	0.44597403	4.04908599	1.667215
78	0.46940663	9.07106490	4.25801801		78.00000000	0.44025641	3.99359447	1.688702
79	0.47957668	9.05138110	4.34083130		79.00000000	0.43468354	3.93448642	1.710076
80	0.48942593	9.06555940	4.43691984		80.00000000	0.42925000	3.89139137	1.731447
81	0.49950743	9.04512980	4.51810954		81.00000000	0.42395062	3.83468836	1.752821
82	0.50934178	9.04150390	4.60521569		82.00000000	0.41878049	3.78640541	1.774286
83	0.51947981	9.01392840	4.68255381		83.00000000	0.41373494	3.72937712	1.795651
84	0.52922040	8.98781680	4.75653600		84.00000000	0.40880952	3.67430511	1.817005
85	0.53936440	8.93383030	4.81859002		85.00000000	0.40400000	3.60926744	1.838374
86	0.54956347	8.88951870	4.88535474		86.00000000	0.39930233	3.54960549	1.859857
87	0.55940086	8.80041600	4.92296028		87.00000000	0.39471264	3.47363546	1.881236
88	0.56950241	8.67823600	4.94227632		88.00000000	0.39022727	3.38648437	1.902631
89	0.57929885	8.51500990	4.93273544		89.00000000	0.38584270	3.28545438	1.923979
90	0.58944654	8.27876570	4.87988980		90.00000000	0.38155556	3.15880905	1.945454
91	0.59922433	7.96659850	4.77377965		91.00000000	0.37736264	3.00629662	1.966843
92	0.60935646	7.52015160	4.58245296		92.00000000	0.37326087	2.80697833	1.988318
93	0.61917293	6.96428540	4.31209700		93.00000000	0.36924731	2.57154366	2.009863
94	0.62927902	6.16610670	3.88020158		94.00000000	0.36531915	2.25259685	2.031255
95	0.63936496	5.15885540	3.29839138		95.00000000	0.36147368	1.86479047	2.052608
96	0.64921719	3.88906620	2.52484863		96.00000000	0.35770833	1.39115139	2.074017
97	0.65932173	2.29375510	1.51232258		97.00000000	0.35402062	0.81203660	2.095500
98	0.66897970	0.37737471	0.25245602		98.00000000	0.35040816	0.13223518	2.116896
99	0.67914975	-1.94943170	-1.32395605		99.00000000	0.34686869	-0.67619681	2.138249
100	0.68883377	-4.61980150	-3.18227528		100.00000000	0.34340000	-1.58643984	2.159622
101	0.69905740	-7.85835500	-5.49344121		101.00000000	0.34000000	-2.67184070	2.181096
