# Supplementary material for: Study on the Electrical Injection Regeneration of Industrialized B-Doped Czochralski Silicon PERC Solar Cells
Source: Hindawi journal article supplement (doi:10.1155/2019/5357370), 2019-06-20
Supplement: f1 [file 5357370.f1.zip › section3.1/IVRawData_1-20-2-30min.csv]

00:28 03/04/2018
Test Lot:	JK-PERC
Recipe:	Recipe_YJX-LID
Cell Name:	1-20-2-30min
Test Order:	2
Test Condition:	Light
1	-0.29977465	9.08531760	-2.72354790		1.00000000	34.34000000	311.98980638	0.000000
2	-0.28998190	9.09032250	-2.63602899		2.00000000	17.17000000	156.08083733	0.061782
3	-0.27983186	9.08784580	-2.54306879		3.00000000	11.44666667	104.02554159	0.083216
4	-0.27003539	9.10016730	-2.45736723		4.00000000	8.58500000	78.12493627	0.104712
5	-0.25986451	9.08193870	-2.36007355		5.00000000	6.86800000	62.37475499	0.126093
6	-0.24973236	9.11147210	-2.27542943		6.00000000	5.72333333	52.14799199	0.147445
7	-0.23991653	9.07289980	-2.17673864		7.00000000	4.90571429	44.50905416	0.168822
8	-0.22976799	9.09725190	-2.09025728		8.00000000	4.29250000	39.04995378	0.190334
9	-0.21992312	9.07856080	-1.99658542		9.00000000	3.81555556	34.63975310	0.211729
10	-0.20981479	9.08017920	-1.90515589		10.00000000	3.43400000	31.18133537	0.233083
11	-0.19997588	9.09269240	-1.81831916		11.00000000	3.12181818	28.38573246	0.254467
12	-0.18979311	9.09229850	-1.72565561		12.00000000	2.86166667	26.01912754	0.275946
13	-0.18003681	9.09098530	-1.63671199		13.00000000	2.64153846	24.01418732	0.297329
14	-0.16987415	9.09323790	-1.54470606		14.00000000	2.45285714	22.30441353	0.318691
15	-0.16006128	9.08935450	-1.45485372		15.00000000	2.28933333	20.80856224	0.340058
16	-0.14989935	9.10623650	-1.36501893		16.00000000	2.14625000	19.54426009	0.361534
17	-0.13973743	9.08066840	-1.26890926		17.00000000	2.02000000	18.34295017	0.382920
18	-0.12997146	9.10014720	-1.18275942		18.00000000	1.90777778	17.36105860	0.404269
19	-0.11981846	9.09356690	-1.08957718		19.00000000	1.80736842	16.43542565	0.425646
20	-0.10998848	9.08853340	-0.99963397		20.00000000	1.71700000	15.60501185	0.447124
21	-0.09980348	9.08559990	-0.90677447		21.00000000	1.63523810	14.85711907	0.468490
22	-0.09001891	9.09373380	-0.81860797		22.00000000	1.56090909	14.19449176	0.489834
23	-0.07981083	9.08430480	-0.72502589		23.00000000	1.49304348	13.56326204	0.511212
24	-0.07004784	9.10038570	-0.63746236		24.00000000	1.43083333	13.02113521	0.532686
25	-0.05986358	9.08464530	-0.54383938		25.00000000	1.37360000	12.47866878	0.554067
26	-0.04974482	9.08565140	-0.45196405		26.00000000	1.32076923	12.00004881	0.575428
27	-0.03995131	9.07837580	-0.36269301		27.00000000	1.27185185	11.54634907	0.596791
28	-0.02976035	9.09140210	-0.27056331		28.00000000	1.22642857	11.14995529	0.618267
29	-0.01994303	9.08421130	-0.18116669		29.00000000	1.18413793	10.75695917	0.639658
30	-0.00979673	9.10317420	-0.08918130		30.00000000	1.14466667	10.42010007	0.661034
31	-0.00062918	9.08294490	-0.00571480		31.00000000	1.10774194	10.06155896	0.682516
32	0.00950649	9.10180950	0.08652630		32.00000000	1.07312500	9.76737932	0.704000
33	0.01934735	9.09200950	0.17590632		33.00000000	1.04060606	9.46120019	0.725379
34	0.02949113	9.09338000	0.26817409		34.00000000	1.01000000	9.18431380	0.746771
35	0.03931115	9.07712360	0.35683219		35.00000000	0.98114286	8.90595498	0.768250
36	0.04945345	9.10396000	0.45022219		36.00000000	0.95388889	8.68416629	0.789615
37	0.05931440	9.08931640	0.53912731		37.00000000	0.92810811	8.43586825	0.810969
38	0.06940533	9.08468340	0.63052547		38.00000000	0.90368421	8.20968495	0.832352
39	0.07957666	9.08483700	0.72294095		39.00000000	0.88051282	7.99931545	0.853813
40	0.08933043	9.09956930	0.81286841		40.00000000	0.85850000	7.81198024	0.875198
41	0.09948538	9.09319970	0.90464038		41.00000000	0.83756098	7.61610921	0.896541
42	0.10936271	9.08526610	0.99358932		42.00000000	0.81761905	7.42828662	0.917920
43	0.11949383	9.09488200	1.08678228		43.00000000	0.79860465	7.26321507	0.939405
44	0.12933022	9.09224510	1.17590206		44.00000000	0.78045455	7.09608402	0.960773
45	0.13946879	9.09158420	1.26799225		45.00000000	0.76311111	6.93788892	0.982134
46	0.14934984	9.08360390	1.35663479		46.00000000	0.74652174	6.78110778	1.003512
47	0.15944153	9.10143380	1.45114653		47.00000000	0.73063830	6.64985610	1.024994
48	0.16960986	9.08185480	1.54037212		48.00000000	0.71541667	6.49731029	1.046385
49	0.17937629	9.09636880	1.63167289		49.00000000	0.70081633	6.37488377	1.067724
50	0.18956250	9.08286290	1.72177020		50.00000000	0.68680000	6.23811024	1.089091
51	0.19936019	9.08825020	1.81183529		51.00000000	0.67333333	6.11942180	1.110560
52	0.20952556	9.08038330	1.90257240		52.00000000	0.66038462	5.99654543	1.131952
53	0.21934333	9.08375740	1.99246160		53.00000000	0.64792453	5.88558923	1.153314
54	0.22948191	9.08157630	2.08405748		54.00000000	0.63592593	5.77520982	1.174688
55	0.23926322	9.09408570	2.17588023		55.00000000	0.62436364	5.67801642	1.196163
56	0.24948664	9.06753830	2.26222966		56.00000000	0.61321429	5.56034402	1.217548
57	0.25958428	9.09039120	2.35972265		57.00000000	0.60245614	5.47656200	1.238914
58	0.26939982	9.09798240	2.45099482		58.00000000	0.59206897	5.38663303	1.260284
59	0.27956444	9.08275130	2.53921428		59.00000000	0.58203390	5.28646915	1.281749
60	0.28933161	9.09761520	2.63222765		60.00000000	0.57233333	5.20686843	1.303118
61	0.29948658	9.08041950	2.71946378		61.00000000	0.56295082	5.11182960	1.324497
62	0.30926195	9.09684940	2.81330938		62.00000000	0.55387097	5.03848078	1.345844
63	0.31944665	9.08984570	2.90372076		63.00000000	0.54507937	4.95468732	1.367319
64	0.32928750	9.09102540	2.99356103		64.00000000	0.53656250	4.87790332	1.388687
65	0.33943725	9.07880310	3.08168396		65.00000000	0.52830769	4.79640151	1.410076
66	0.34923345	9.08634280	3.17325484		66.00000000	0.52030303	4.72765169	1.431562
67	0.35940179	9.09524920	3.26884884		67.00000000	0.51253731	4.66165459	1.452951
68	0.36954778	9.07201390	3.35254260		68.00000000	0.50500000	4.58136702	1.474362
69	0.37936783	9.08320050	3.44587406		69.00000000	0.49768116	4.52053776	1.495752
70	0.38951382	9.08810810	3.53994370		70.00000000	0.49057143	4.45836617	1.517241
71	0.39935023	9.08723740	3.62899035		71.00000000	0.48366197	4.39515116	1.538622
72	0.40949550	9.08682350	3.72101333		72.00000000	0.47694444	4.33390999	1.559956
73	0.41934678	9.08656790	3.81042299		73.00000000	0.47041096	4.27442112	1.581340
74	0.42948759	9.08229540	3.90073316		74.00000000	0.46405405	4.21467600	1.602816
75	0.43928823	9.08549310	3.99115018		75.00000000	0.45786667	4.15994444	1.624196
76	0.44944021	9.08690830	4.08402197		76.00000000	0.45184211	4.10584778	1.645555
77	0.45960185	9.07938860	4.17290380		77.00000000	0.44597403	4.04917149	1.666928
78	0.46948215	9.07078550	4.25857188		78.00000000	0.44025641	3.99347146	1.688409
79	0.47959319	9.07262800	4.35117060		79.00000000	0.43468354	3.94372210	1.709790
80	0.48940501	9.06799030	4.43791988		80.00000000	0.42925000	3.89243484	1.731133
81	0.49952275	9.06143670	4.52639378		81.00000000	0.42395062	3.84160168	1.752508
82	0.50932044	9.02301220	4.59560454		82.00000000	0.41878049	3.77866145	1.773982
83	0.51953864	9.01685710	4.68460567		83.00000000	0.41373494	3.73058883	1.795348
84	0.52927160	8.97985270	4.75278101		84.00000000	0.40880952	3.67104931	1.816711
85	0.53939158	8.95793910	4.83183692		85.00000000	0.40400000	3.61900740	1.838083
86	0.54958892	8.89131260	4.88656689		86.00000000	0.39930233	3.55032180	1.859560
87	0.55937320	8.80726240	4.92654655		87.00000000	0.39471264	3.47633783	1.880946
88	0.56951106	8.66734220	4.93614724		88.00000000	0.39022727	3.38223331	1.902305
89	0.57933551	8.50682260	4.92830441		89.00000000	0.38584270	3.28229537	1.923670
90	0.58950609	8.25825210	4.86828991		90.00000000	0.38155556	3.15098197	1.945139
91	0.59921300	7.94091940	4.75830214		91.00000000	0.37736264	2.99660629	1.966513
92	0.60937613	7.49952600	4.57003213		92.00000000	0.37326087	2.79927960	1.987985
93	0.61918867	6.89796730	4.27114320		93.00000000	0.36924731	2.54705588	2.009368
94	0.62928259	6.11578040	3.84855413		94.00000000	0.36531915	2.23421169	2.030857
95	0.63940406	5.09264990	3.25626102		95.00000000	0.36147368	1.84085892	2.052232
96	0.64918762	3.83500050	2.48963485		96.00000000	0.35770833	1.37181164	2.073619
97	0.65928823	2.23152610	1.47121889		97.00000000	0.35402062	0.79000625	2.095102
98	0.66901445	0.34748456	0.23247219		98.00000000	0.35040816	0.12176143	2.116480
99	0.67911136	-1.98242700	-1.34628870		99.00000000	0.34686869	-0.68764185	2.137840
100	0.68884206	-4.59187560	-3.16307705		100.00000000	0.34340000	-1.57685008	2.159212
101	0.69905806	-7.76856850	-5.43068042		101.00000000	0.34000000	-2.64131329	2.180732
00:28 03/04/2018
Test Lot:	JK-PERC
Recipe:	Recipe_YJX-LID
Cell Name:	1-20-2-30min
Test Order:	3
Test Condition:	Light
1	-0.29979101	9.08361910	-2.72318734		1.00000000	34.34000000	311.93147989	0.000000
2	-0.28994989	9.09351160	-2.63666269		2.00000000	17.17000000	156.13559417	0.021574
3	-0.27979985	9.10196110	-2.54672735		3.00000000	11.44666667	104.18711472	0.043032
4	-0.27003539	9.07452200	-2.45044209		4.00000000	8.58500000	77.90477137	0.064405
5	-0.25987494	9.11039350	-2.36756296		5.00000000	6.86800000	62.57018256	0.085790
6	-0.24971375	9.07606890	-2.26641920		6.00000000	5.72333333	51.94536767	0.107314
7	-0.23992099	9.07279300	-2.17675348		7.00000000	4.90571429	44.50853023	0.128717
8	-0.22974715	9.10072420	-2.09086545		8.00000000	4.29250000	39.06485863	0.150064
9	-0.21993281	9.08414650	-1.99790187		9.00000000	3.81555556	34.66106565	0.171494
10	-0.20979618	9.08948140	-1.90693848		10.00000000	3.43400000	31.21327913	0.192995
11	-0.19997217	9.09103200	-1.81795340		11.00000000	3.12181818	28.38054899	0.214362
12	-0.18982139	9.08585830	-1.72469025		12.00000000	2.86166667	26.00069784	0.235726
13	-0.18004948	9.10063930	-1.63856537		13.00000000	2.64153846	24.03968874	0.257099
14	-0.16987713	9.08511070	-1.54335253		14.00000000	2.45285714	22.28447867	0.278577
15	-0.16005683	9.08588700	-1.45425827		15.00000000	2.28933333	20.80062397	0.299965
16	-0.14992987	9.08636950	-1.36231820		16.00000000	2.14625000	19.50162054	0.321305
17	-0.13978505	9.09486390	-1.27132601		17.00000000	2.02000000	18.37162508	0.342667
18	-0.12993573	9.07932850	-1.17972918		18.00000000	1.90777778	17.32134115	0.364151
19	-0.11979687	9.08675000	-1.08856421		19.00000000	1.80736842	16.42310500	0.385528
20	-0.10997359	9.09843640	-1.00058771		20.00000000	1.71700000	15.62201530	0.406882
21	-0.09989131	9.08001230	-0.90701428		21.00000000	1.63523810	14.84798202	0.428257
22	-0.09007398	9.08634570	-0.81844332		22.00000000	1.56090909	14.18295961	0.449737
23	-0.07989568	9.09223840	-0.72643052		23.00000000	1.49304348	13.57510725	0.471135
24	-0.07006719	9.09439950	-0.63721902		24.00000000	1.43083333	13.01256995	0.492492
25	-0.05990898	9.08574490	-0.54431770		25.00000000	1.37360000	12.48017919	0.513866
26	-0.04972918	9.08834650	-0.45195605		26.00000000	1.32076923	12.00360842	0.535339
27	-0.03993568	9.08470540	-0.36280387		27.00000000	1.27185185	11.55439939	0.556711
28	-0.02980352	9.09525110	-0.27107048		28.00000000	1.22642857	11.15467581	0.578065
29	-0.01996089	9.09001060	-0.18144471		29.00000000	1.18413793	10.76382634	0.599439
30	-0.00983692	9.09531590	-0.08946988		30.00000000	1.14466667	10.41110493	0.620925
31	-0.00064034	9.08671000	-0.00581861		31.00000000	1.10774194	10.06572972	0.642418
32	0.00954073	9.09048650	0.08672990		32.00000000	1.07312500	9.75522833	0.663825
33	0.01930270	9.08341500	0.17533440		33.00000000	1.04060606	9.45225670	0.685161
34	0.02945839	9.08065510	0.26750143		34.00000000	1.01000000	9.17146165	0.706629
35	0.03930073	9.09704490	0.35752052		35.00000000	0.98114286	8.92550062	0.728009
36	0.04943112	9.08738230	0.44919944		36.00000000	0.95388889	8.66835301	0.749395
37	0.05926677	9.08484550	0.53842940		37.00000000	0.92810811	8.43171877	0.770815
38	0.06944404	9.07626630	0.63029258		38.00000000	0.90368421	8.20207855	0.792280
39	0.07960345	9.09682080	0.72413831		39.00000000	0.88051282	8.00986734	0.813640
40	0.08939444	9.08138750	0.81182550		40.00000000	0.85850000	7.79637117	0.835003
41	0.09957767	9.09347340	0.90550685		41.00000000	0.83756098	7.61633845	0.856374
42	0.10935005	9.08775620	0.99374659		42.00000000	0.81761905	7.43032257	0.877859
43	0.11952807	9.10026550	1.08773717		43.00000000	0.79860465	7.26751436	0.899247
44	0.12931906	9.08394620	1.17472738		44.00000000	0.78045455	7.08960710	0.920609
45	0.13945241	9.08492090	1.26691411		45.00000000	0.76311111	6.93280408	0.941966
46	0.14931636	9.09186460	1.35756413		46.00000000	0.74652174	6.78727457	0.963434
47	0.15947352	9.09177300	1.44989704		47.00000000	0.73063830	6.64279755	0.984811
48	0.16957936	9.08815960	1.54116429		48.00000000	0.71541667	6.50182085	1.006185
49	0.17942095	9.08949850	1.63084646		49.00000000	0.70081633	6.37006895	1.027537
50	0.18954018	9.08353230	1.72169435		50.00000000	0.68680000	6.23856998	1.049016
51	0.19933116	9.08247570	1.81042042		51.00000000	0.67333333	6.11553364	1.070406
52	0.20948611	9.09724330	1.90574611		52.00000000	0.66038462	6.00767952	1.091796
53	0.21931505	9.08387950	1.99223149		53.00000000	0.64792453	5.88566834	1.113268
54	0.22944842	9.08200360	2.08385138		54.00000000	0.63592593	5.77548155	1.134656
55	0.23925877	9.09206010	2.17535512		55.00000000	0.62436364	5.67675171	1.156021
56	0.24938467	9.08712670	2.26619009		56.00000000	0.61321429	5.57235591	1.177392
57	0.25953367	9.08837320	2.35873885		57.00000000	0.60245614	5.47534624	1.198873
58	0.26937899	9.09234710	2.44928728		58.00000000	0.59206897	5.38329654	1.220239
59	0.27952278	9.08460520	2.53935410		59.00000000	0.58203390	5.28754818	1.241591
60	0.28937107	9.09480670	2.63177395		60.00000000	0.57233333	5.20526103	1.262982
61	0.29949847	9.08847050	2.72198301		61.00000000	0.56295082	5.11636192	1.284456
62	0.30933338	9.09083650	2.81209918		62.00000000	0.55387097	5.03515041	1.305836
63	0.31947419	9.08032990	2.90093104		63.00000000	0.54507937	4.94950046	1.327189
64	0.32928303	9.09760860	2.99568813		64.00000000	0.53656250	4.88143561	1.348564
65	0.33944395	9.08100030	3.08249061		65.00000000	0.52830769	4.79756231	1.370040
66	0.34926024	9.08870220	3.17432231		66.00000000	0.52030303	4.72887930	1.391415
67	0.35937425	9.08930780	3.26646317		67.00000000	0.51253731	4.65860940	1.412765
68	0.36956194	9.08353710	3.35692959		68.00000000	0.50500000	4.58718624	1.434139
69	0.37934324	9.08468720	3.44621468		69.00000000	0.49768116	4.52127766	1.455620
70	0.38954434	9.08619590	3.53947618		70.00000000	0.49057143	4.45742810	1.477004
71	0.39937925	9.08693700	3.62913408		71.00000000	0.48366197	4.39500587	1.498364
72	0.40955505	9.07623770	3.71721899		72.00000000	0.47694444	4.32886115	1.519739
73	0.41931477	9.08242610	3.80839541		73.00000000	0.47041096	4.27247277	1.541225
74	0.42950320	9.08252620	3.90097407		74.00000000	0.46405405	4.21478310	1.562623
75	0.43925551	9.07761290	3.98739148		75.00000000	0.45786667	4.15633636	1.583981
76	0.44948560	9.08434680	4.08328307		76.00000000	0.45184211	4.10469038	1.605338
77	0.45959142	9.07428840	4.17046509		77.00000000	0.44597403	4.04689693	1.626828
78	0.46942037	9.07285500	4.25898295		78.00000000	0.44025641	3.99438257	1.648195
79	0.47958499	9.07476620	4.35212166		79.00000000	0.43468354	3.94465154	1.669576
80	0.48936707	9.06217100	4.43472807		80.00000000	0.42925000	3.88993690	1.690919
81	0.49952647	9.05682090	4.52412177		81.00000000	0.42395062	3.83964481	1.712388
82	0.50935245	9.04356190	4.60636041		82.00000000	0.41878049	3.78726726	1.733782
83	0.51949173	9.01722620	4.68437444		83.00000000	0.41373494	3.73074154	1.755170
84	0.52926934	8.99945830	4.76313735		84.00000000	0.40880952	3.67906426	1.776638
85	0.53943175	8.95398430	4.83006342		85.00000000	0.40400000	3.61740966	1.798036
86	0.54959339	8.89396950	4.88806685		86.00000000	0.39930233	3.55138271	1.819379
87	0.55938292	8.80299470	4.92424488		87.00000000	0.39471264	3.47465331	1.840748
88	0.56952667	8.69482610	4.95193535		88.00000000	0.39022727	3.39295828	1.862230
89	0.57936829	8.50889020	4.92978116		89.00000000	0.38584270	3.28309314	1.883596
90	0.58944356	8.28314210	4.88244477		90.00000000	0.38155556	3.16047889	1.904954
91	0.59922636	7.95323280	4.76578674		91.00000000	0.37736264	3.00125290	1.926336
92	0.60939693	7.52328250	4.58466526		92.00000000	0.37326087	2.80814697	1.947816
93	0.61916786	6.92776780	4.28945116		93.00000000	0.36924731	2.55805964	1.969200
94	0.62929004	6.14467950	3.86678561		94.00000000	0.36531915	2.24476909	1.990679
95	0.63939291	5.10999680	3.26729572		95.00000000	0.36147368	1.84712937	2.012083
96	0.64916527	3.86431360	2.50857818		96.00000000	0.35770833	1.38229718	2.033561
97	0.65929192	2.24995020	1.48337399		97.00000000	0.35402062	0.79652876	2.054941
98	0.66895938	0.34418648	0.23024677		98.00000000	0.35040816	0.12060575	2.076278
99	0.67910612	-2.00350760	-1.36059427		99.00000000	0.34686869	-0.69495405	2.097650
100	0.68881971	-4.66496710	-3.21332128		100.00000000	0.34340000	-1.60194970	2.119138
101	0.69897836	-7.87894150	-5.50720961		101.00000000	0.34000000	-2.67884011	2.140508
00:28 03/04/2018
Test Lot:	JK-PERC
Recipe:	Recipe_YJX-LID
Cell Name:	1-20-2-30min
Test Order:	4
Test Condition:	Light
1	-0.29985365	9.09104160	-2.72598201		1.00000000	34.34000000	312.18636854	0.000000
2	-0.29001546	9.09097670	-2.63652379		2.00000000	17.17000000	156.09206994	0.061781
3	-0.27991456	9.09189130	-2.54495275		3.00000000	11.44666667	104.07184908	0.083245
4	-0.27008304	9.08730030	-2.45432569		4.00000000	8.58500000	78.01447308	0.104752
5	-0.25993001	9.08488560	-2.36143440		5.00000000	6.86800000	62.39499430	0.126121
6	-0.24974871	9.09760380	-2.27211481		6.00000000	5.72333333	52.06861908	0.147529
7	-0.23995146	9.08500390	-2.17995995		7.00000000	4.90571429	44.56843342	0.168916
8	-0.22982597	9.09871860	-2.09112183		8.00000000	4.29250000	39.05624959	0.190406
9	-0.21997215	9.08708000	-1.99890452		9.00000000	3.81555556	34.67225858	0.211797
10	-0.20985335	9.08587840	-1.90670202		10.00000000	3.43400000	31.20090643	0.233149
11	-0.19999656	9.09441470	-1.81885166		11.00000000	3.12181818	28.39110916	0.254514
12	-0.18986809	9.08527950	-1.72500467		12.00000000	2.86166667	25.99904150	0.275999
13	-0.18002097	9.09477140	-1.63724957		13.00000000	2.64153846	24.02418845	0.297380
14	-0.16987836	9.09238150	-1.54459886		14.00000000	2.45285714	22.30231291	0.318735
15	-0.16012427	9.08098220	-1.45408565		15.00000000	2.28933333	20.78939525	0.340104
16	-0.14992957	9.08582690	-1.36223412		16.00000000	2.14625000	19.50045598	0.361596
17	-0.13979439	9.08793930	-1.27044293		17.00000000	2.02000000	18.35763739	0.382984
18	-0.13001426	9.08613010	-1.18132648		18.00000000	1.90777778	17.33431709	0.404339
19	-0.11984709	9.09261510	-1.08972346		19.00000000	1.80736842	16.43370540	0.425707
20	-0.10997764	9.09275910	-1.00000019		20.00000000	1.71700000	15.61226737	0.447180
21	-0.09984098	9.07721900	-0.90627848		21.00000000	1.63523810	14.84341431	0.468542
22	-0.09000131	9.09909060	-0.81893005		22.00000000	1.56090909	14.20285324	0.489921
23	-0.07983711	9.08516600	-0.72533343		23.00000000	1.49304348	13.56454785	0.511304
24	-0.07006516	9.08097170	-0.63625976		24.00000000	1.43083333	12.99335701	0.532782
25	-0.05992628	9.09604640	-0.54509218		25.00000000	1.37360000	12.49432934	0.554158
26	-0.04977102	9.07954030	-0.45189794		26.00000000	1.32076923	11.99197746	0.575550
27	-0.03996483	9.08405780	-0.36304282		27.00000000	1.27185185	11.55357574	0.596905
28	-0.02976119	9.09157090	-0.27057593		28.00000000	1.22642857	11.15016231	0.618389
29	-0.02002720	9.08541580	-0.18195542		29.00000000	1.18413793	10.75838547	0.639759
30	-0.00988459	9.08938310	-0.08984481		30.00000000	1.14466667	10.40431386	0.661150
31	-0.00067980	9.10029220	-0.00618637		31.00000000	1.10774194	10.08077530	0.682752
32	0.00947228	9.09007550	0.08610373		32.00000000	1.07312500	9.75478727	0.704201
33	0.01929382	9.08323670	0.17525029		33.00000000	1.04060606	9.45207116	0.725571
34	0.02944879	9.07790470	0.26733330		34.00000000	1.01000000	9.16868375	0.746953
35	0.03923162	9.09000680	0.35661570		35.00000000	0.98114286	8.91859524	0.768296
36	0.04941860	9.08116250	0.44877832		36.00000000	0.95388889	8.66242001	0.789790
37	0.05920590	9.09175590	0.53828556		37.00000000	0.92810811	8.43813237	0.811171
38	0.06937724	9.08045480	0.62997693		38.00000000	0.90368421	8.20586363	0.832569
39	0.07947044	9.08750530	0.72218805		39.00000000	0.88051282	8.00166492	0.853925
40	0.08933738	9.08392720	0.81153425		40.00000000	0.85850000	7.79855150	0.875404
41	0.09947003	9.08288960	0.90347527		41.00000000	0.83756098	7.60747387	0.896784
42	0.10929528	9.08435150	0.99287674		42.00000000	0.81761905	7.42753882	0.918165
43	0.11946440	9.09609990	1.08666012		43.00000000	0.79860465	7.26418769	0.939510
44	0.12930156	9.08487700	1.17468877		44.00000000	0.78045455	7.09033355	0.960985
45	0.13943420	9.10067940	1.26894595		45.00000000	0.76311111	6.94482957	0.982377
46	0.14925574	9.08518890	1.35601659		46.00000000	0.74652174	6.78229102	1.003761
47	0.15944792	9.08485890	1.44856186		47.00000000	0.73063830	6.63774584	1.025251
48	0.16957909	9.08619020	1.54082787		48.00000000	0.71541667	6.50041191	1.046635
49	0.17938648	9.08259580	1.62929489		49.00000000	0.70081633	6.36523142	1.067992
50	0.18950573	9.09423450	1.72340955		50.00000000	0.68680000	6.24592025	1.089363
51	0.19926921	9.07794670	1.80895527		51.00000000	0.67333333	6.11248411	1.110851
52	0.20947182	9.08701990	1.90347460		52.00000000	0.66038462	6.00092814	1.132225
53	0.21925241	9.09152220	1.99333815		53.00000000	0.64792453	5.89062023	1.153577
54	0.22939995	9.07916450	2.08275988		54.00000000	0.63592593	5.77367609	1.174962
55	0.23925424	9.07841870	2.17205017		55.00000000	0.62436364	5.66823451	1.196451
56	0.24940920	9.09330650	2.26795430		56.00000000	0.61321429	5.57614545	1.217829
57	0.25954631	9.08809950	2.35878269		57.00000000	0.60245614	5.47518135	1.239174
58	0.26936933	9.08407120	2.44697017		58.00000000	0.59206897	5.37839664	1.260540
59	0.27949601	9.09225180	2.54124810		59.00000000	0.58203390	5.29199876	1.282011
60	0.28932425	9.07732870	2.62629132		60.00000000	0.57233333	5.19525779	1.303384
61	0.29947329	9.09202100	2.72281744		61.00000000	0.56295082	5.11836067	1.324724
62	0.30926952	9.09255030	2.81204867		62.00000000	0.55387097	5.03609963	1.346112
63	0.31941110	9.09009550	2.90347740		63.00000000	0.54507937	4.95482348	1.367593
64	0.32922220	9.08240890	2.99013064		64.00000000	0.53656250	4.87328003	1.388969
65	0.33938834	9.09659580	3.08727855		65.00000000	0.52830769	4.80580153	1.410336
66	0.34921136	9.07815650	3.17019538		66.00000000	0.52030303	4.72339234	1.431713
67	0.35935518	9.09523870	3.26842114		67.00000000	0.51253731	4.66164921	1.453186
68	0.36951461	9.08100700	3.35556476		68.00000000	0.50500000	4.58590854	1.474572
69	0.37929744	9.09282590	3.44888559		69.00000000	0.49768116	4.52532814	1.495929
70	0.38949931	9.08398720	3.53820675		70.00000000	0.49057143	4.45634458	1.517345
71	0.39931041	9.09386060	3.63127320		71.00000000	0.48366197	4.39835455	1.538824
72	0.40948102	9.08002760	3.71809896		72.00000000	0.47694444	4.33066872	1.560197
73	0.41925195	9.08792590	3.81013066		73.00000000	0.47041096	4.27505994	1.581588
74	0.42941511	9.07662110	3.89763825		74.00000000	0.46405405	4.21204282	1.602956
75	0.43925080	9.08971980	3.99266669		75.00000000	0.45786667	4.16187971	1.624431
76	0.44947127	9.07089900	4.07710849		76.00000000	0.45184211	4.09861410	1.645811
77	0.45951682	9.08759210	4.17590142		77.00000000	0.44597403	4.05283004	1.667183
78	0.46941352	9.07103730	4.25806755		78.00000000	0.44025641	3.99358232	1.688663
79	0.47954544	9.06772520	4.34838627		79.00000000	0.43468354	3.94159093	1.710036
80	0.48939896	9.07407670	4.44084370		80.00000000	0.42925000	3.89504742	1.731400
81	0.49951598	9.04236220	4.51680442		81.00000000	0.42395062	3.83351504	1.752772
82	0.50933379	9.03910640	4.60392232		82.00000000	0.41878049	3.78540139	1.774260
83	0.51947016	9.01688100	4.68400062		83.00000000	0.41373494	3.73059872	1.795644
84	0.52927756	8.98725410	4.75675192		84.00000000	0.40880952	3.67407507	1.816990
85	0.53940499	8.95216370	4.82884177		85.00000000	0.40400000	3.61667413	1.838370
86	0.54957414	8.87602810	4.87803551		86.00000000	0.39930233	3.54421866	1.859858
87	0.55929738	8.80813500	4.92636683		87.00000000	0.39471264	3.47668225	1.881240
88	0.56950969	8.66435720	4.93443538		88.00000000	0.39022727	3.38106848	1.902596
89	0.57933718	8.52611830	4.93949733		89.00000000	0.38584270	3.28974048	1.923973
90	0.58946091	8.26690580	4.87301782		90.00000000	0.38155556	3.15428384	1.945441
91	0.59923702	7.95548010	4.76721819		91.00000000	0.37736264	3.00210095	1.966816
92	0.60936821	7.50635430	4.57413368		92.00000000	0.37326087	2.80182833	1.988288
93	0.61912048	6.93214890	4.29183535		93.00000000	0.36924731	2.55967735	2.009698
94	0.62926656	6.13862800	3.86283332		94.00000000	0.36531915	2.24255836	2.031185
95	0.63936120	5.11415340	3.26979125		95.00000000	0.36147368	1.84863187	2.052560
96	0.64920431	3.85467840	2.50247383		96.00000000	0.35770833	1.37885059	2.073927
97	0.65925586	2.24915910	1.48277132		97.00000000	0.35402062	0.79624870	2.095310
98	0.66899997	0.34360430	0.22987127		98.00000000	0.35040816	0.12040175	2.116782
99	0.67904925	-1.99697240	-1.35604261		99.00000000	0.34686869	-0.69268719	2.138164
100	0.68875468	-4.65525390	-3.20632791		100.00000000	0.34340000	-1.59861419	2.159578
101	0.69899380	-7.87319710	-5.50331596		101.00000000	0.34000000	-2.67688701	2.180963
