# Supplementary material for: Study on the Electrical Injection Regeneration of Industrialized B-Doped Czochralski Silicon PERC Solar Cells
Source: Hindawi journal article supplement (doi:10.1155/2019/5357370), 2019-06-20
Supplement: f1 [file 5357370.f1.zip › section3.1/IVRawData_1-20-2-40min.csv]

00:40 03/04/2018
Test Lot:	JK-PERC
Recipe:	Recipe_YJX-LID
Cell Name:	1-20-2-40min
Test Order:	2
Test Condition:	Light
1	-0.29977551	9.09720800	-2.72712017		1.00000000	34.34000000	312.39812272	0.000000
2	-0.28994250	9.08128360	-2.63305007		2.00000000	17.17000000	155.92563941	0.061793
3	-0.27985492	9.10174180	-2.54716722		3.00000000	11.44666667	104.18460447	0.083222
4	-0.26999211	9.07647610	-2.45057693		4.00000000	8.58500000	77.92154732	0.104720
5	-0.25985911	9.09123990	-2.36244151		5.00000000	6.86800000	62.43863563	0.126109
6	-0.24969041	9.08461480	-2.26834119		6.00000000	5.72333333	51.99427871	0.147458
7	-0.23992735	9.09676070	-2.18256169		7.00000000	4.90571429	44.62610892	0.168831
8	-0.22974896	9.07865240	-2.08581095		8.00000000	4.29250000	38.97011543	0.190376
9	-0.21987501	9.09638690	-2.00006816		9.00000000	3.81555556	34.70776957	0.211763
10	-0.20975393	9.09451100	-1.90760942		10.00000000	3.43400000	31.23055077	0.233142
11	-0.19985911	9.07793810	-1.81430863		11.00000000	3.12181818	28.33967221	0.254507
12	-0.18977079	9.09834770	-1.72660063		12.00000000	2.86166667	26.03643833	0.275989
13	-0.17999135	9.08043580	-1.63439990		13.00000000	2.64153846	23.98632041	0.297375
14	-0.16983530	9.09984780	-1.54547538		14.00000000	2.45285714	22.32062668	0.318770
15	-0.16006181	9.08921050	-1.45483548		15.00000000	2.28933333	20.80823257	0.340117
16	-0.14991990	9.08947090	-1.36269257		16.00000000	2.14625000	19.50827692	0.361587
17	-0.13969983	9.07979390	-1.26844566		17.00000000	2.02000000	18.34118368	0.382950
18	-0.12987499	9.09721470	-1.18150067		18.00000000	1.90777778	17.35546404	0.404324
19	-0.11972190	9.07958980	-1.08702574		19.00000000	1.80736842	16.41016388	0.425827
20	-0.10995512	9.08562280	-0.99901075		20.00000000	1.71700000	15.60001435	0.447218
21	-0.09977748	9.08607480	-0.90658566		21.00000000	1.63523810	14.85789565	0.468565
22	-0.08997869	9.08011250	-0.81701660		22.00000000	1.56090909	14.17323015	0.489936
23	-0.07977723	9.08561420	-0.72482510		23.00000000	1.49304348	13.56521703	0.511408
24	-0.06998216	9.08328150	-0.63566770		24.00000000	1.43083333	12.99666195	0.532797
25	-0.05983131	9.08716680	-0.54369713		25.00000000	1.37360000	12.48213232	0.554139
26	-0.04971470	9.09097670	-0.45195521		26.00000000	1.32076923	12.00708230	0.575509
27	-0.03988986	9.08803560	-0.36252048		27.00000000	1.27185185	11.55863491	0.596978
28	-0.02971520	9.09701730	-0.27031966		28.00000000	1.22642857	11.15684193	0.618341
29	-0.01991566	9.08328820	-0.18089971		29.00000000	1.18413793	10.75586610	0.639682
30	-0.00979012	9.08970450	-0.08898931		30.00000000	1.14466667	10.40468175	0.661054
31	-0.00060017	9.09730430	-0.00545996		31.00000000	1.10774194	10.07746547	0.682657
32	0.00951251	9.09176920	0.08648551		32.00000000	1.07312500	9.75660482	0.704041
33	0.01938396	9.09435080	0.17628451		33.00000000	1.04060606	9.46363656	0.725404
34	0.02949060	9.09065630	0.26808894		34.00000000	1.01000000	9.18156286	0.746780
35	0.03932558	9.08399200	0.35723329		35.00000000	0.98114286	8.91269387	0.768258
36	0.04942256	9.09344770	0.44942142		36.00000000	0.95388889	8.67413872	0.789640
37	0.05926349	9.08537770	0.53843119		37.00000000	0.92810811	8.43221271	0.810979
38	0.06942224	9.09738160	0.63156059		38.00000000	0.90368421	8.22116011	0.832357
39	0.07956833	9.08800890	0.72311765		39.00000000	0.88051282	8.00210835	0.853834
40	0.08940777	9.08772180	0.81251296		40.00000000	0.85850000	7.80180917	0.875216
41	0.09956131	9.07850170	0.90386753		41.00000000	0.83756098	7.60379874	0.896596
42	0.10937843	9.09208770	0.99447828		42.00000000	0.81761905	7.43386409	0.917954
43	0.11950219	9.07969670	1.08504364		43.00000000	0.79860465	7.25108802	0.939424
44	0.12938406	9.07639880	1.17434133		44.00000000	0.78045455	7.08371670	0.960815
45	0.13951378	9.08430290	1.26738544		45.00000000	0.76311111	6.93233248	0.982199
46	0.14934206	9.09306050	1.35797639		46.00000000	0.74652174	6.78816734	1.003538
47	0.15950155	9.08502200	1.44907509		47.00000000	0.73063830	6.63786501	1.024998
48	0.16966030	9.08349510	1.54110850		48.00000000	0.71541667	6.49848379	1.046362
49	0.17947295	9.09541230	1.63238048		49.00000000	0.70081633	6.37421344	1.067742
50	0.18957067	9.08222480	1.72172344		50.00000000	0.68680000	6.23767199	1.089215
51	0.19937365	9.07637600	1.80959021		51.00000000	0.67333333	6.11142651	1.110597
52	0.20952643	9.11024670	1.90883747		52.00000000	0.66038462	6.01626676	1.132004
53	0.21935025	9.08044910	1.99179878		53.00000000	0.64792453	5.88344570	1.153383
54	0.22948518	9.09923840	2.08814036		54.00000000	0.63592593	5.78644160	1.174868
55	0.23929560	9.07392120	2.17134942		55.00000000	0.62436364	5.66542644	1.196266
56	0.24948040	9.09401230	2.26877783		56.00000000	0.61321429	5.57657826	1.217622
57	0.25959820	9.08867170	2.35940281		57.00000000	0.60245614	5.47552607	1.238986
58	0.26940861	9.08144570	2.44661966		58.00000000	0.59206897	5.37684216	1.260477
59	0.27958599	9.08396240	2.53974862		59.00000000	0.58203390	5.28717405	1.281852
60	0.28942618	9.10012630	2.63381479		60.00000000	0.57233333	5.20830562	1.303200
61	0.29955143	9.07411290	2.71816350		61.00000000	0.56295082	5.10827929	1.324583
62	0.30937076	9.09326270	2.81318959		62.00000000	0.55387097	5.03649421	1.346059
63	0.31946847	9.08367350	2.90194728		63.00000000	0.54507937	4.95132298	1.367436
64	0.32931685	9.09162710	2.99402600		64.00000000	0.53656250	4.87822617	1.388795
65	0.33941531	9.08001040	3.08189454		65.00000000	0.52830769	4.79703934	1.410165
66	0.34928006	9.09430600	3.17645975		66.00000000	0.52030303	4.73179497	1.431644
67	0.35940829	9.07754900	3.26254636		67.00000000	0.51253731	4.65258258	1.453038
68	0.36958119	9.09058090	3.35970771		68.00000000	0.50500000	4.59074335	1.474387
69	0.37939161	9.08657260	3.44736941		69.00000000	0.49768116	4.52221599	1.495768
70	0.38956746	9.09555910	3.54333386		70.00000000	0.49057143	4.46202142	1.517237
71	0.39938831	9.07834150	3.62578347		71.00000000	0.48366197	4.39084855	1.538616
72	0.40956566	9.09295080	3.72416040		72.00000000	0.47694444	4.33683237	1.559985
73	0.41936865	9.06887910	3.80320359		73.00000000	0.47041096	4.26610011	1.581356
74	0.42949834	9.09276200	3.90532619		74.00000000	0.46405405	4.21953307	1.602830
75	0.43934599	9.07223420	3.98584972		75.00000000	0.45786667	4.15387363	1.624216
76	0.44947571	9.08210470	4.08218546		76.00000000	0.45184211	4.10367731	1.645606
77	0.45960245	9.08178810	4.17401206		77.00000000	0.44597403	4.05024160	1.666949
78	0.46947390	9.06032850	4.25358776		78.00000000	0.44025641	3.98886770	1.688418
79	0.47962001	9.07629200	4.35317126		79.00000000	0.43468354	3.94531478	1.709805
80	0.48943785	9.05729770	4.43298431		80.00000000	0.42925000	3.88784504	1.731239
81	0.49958396	9.06978030	4.53111676		81.00000000	0.42395062	3.84513896	1.752727
82	0.50941819	9.02711200	4.59857506		82.00000000	0.41878049	3.78037837	1.774102
83	0.51956505	9.02714350	4.69018826		83.00000000	0.41373494	3.73484467	1.795452
84	0.52932185	8.98340030	4.75511007		84.00000000	0.40880952	3.67249960	1.816828
85	0.53944266	8.95839690	4.83254145		85.00000000	0.40400000	3.61919235	1.838303
86	0.54960364	8.88559250	4.88355398		86.00000000	0.39930233	3.54803775	1.859702
87	0.55944008	8.80964760	4.92846996		87.00000000	0.39471264	3.47727929	1.881045
88	0.56953633	8.68072890	4.94399048		88.00000000	0.39022727	3.38745716	1.902416
89	0.57938993	8.51722620	4.93479509		89.00000000	0.38584270	3.28630952	1.923918
90	0.58952856	8.28771210	4.88584298		90.00000000	0.38155556	3.16222259	1.945302
91	0.59931290	7.96657370	4.77447039		91.00000000	0.37736264	3.00628726	1.966650
92	0.60940099	7.51110030	4.57727196		92.00000000	0.37326087	2.80359983	1.988159
93	0.61922628	6.93236020	4.29269962		93.00000000	0.36924731	2.55975537	2.009674
94	0.62932843	6.14032890	3.86428355		94.00000000	0.36531915	2.24317973	2.031059
95	0.63939786	5.11962370	3.27347644		95.00000000	0.36147368	1.85060924	2.052417
96	0.64921796	3.85700800	2.50403887		96.00000000	0.35770833	1.37968390	2.073793
97	0.65929413	2.22940900	1.46983627		97.00000000	0.35402062	0.78925675	2.095271
98	0.66907179	0.31781015	0.21263781		98.00000000	0.35040816	0.11136327	2.116679
99	0.67909431	-2.05532570	-1.39575999		99.00000000	0.34686869	-0.71292813	2.138022
100	0.68883479	-4.73976990	-3.26491840		100.00000000	0.34340000	-1.62763698	2.159395
101	0.69910741	-8.01186750	-5.60115594		101.00000000	0.34000000	-2.72403495	2.180916
00:40 03/04/2018
Test Lot:	JK-PERC
Recipe:	Recipe_YJX-LID
Cell Name:	1-20-2-40min
Test Order:	3
Test Condition:	Light
1	-0.29976287	9.07872200	-2.72146376		1.00000000	34.34000000	311.76331348	0.000000
2	-0.28991580	9.09311200	-2.63623684		2.00000000	17.17000000	156.12873304	0.021575
3	-0.27985477	9.08283330	-2.54187422		3.00000000	11.44666667	103.96816517	0.083216
4	-0.27002597	9.08285050	-2.45260552		4.00000000	8.58500000	77.97627154	0.104704
5	-0.25985703	9.08474920	-2.36073595		5.00000000	6.86800000	62.39405751	0.126110
6	-0.24970520	9.09471890	-2.27099860		6.00000000	5.72333333	52.05210784	0.147508
7	-0.23994340	9.07499220	-2.17748448		7.00000000	4.90571429	44.51931888	0.168900
8	-0.22975361	9.08763790	-2.08791761		8.00000000	4.29250000	39.00868569	0.190391
9	-0.21995534	9.09012600	-1.99942175		9.00000000	3.81555556	34.68388076	0.211769
10	-0.20980872	9.07501220	-1.90401669		10.00000000	3.43400000	31.16359189	0.233115
11	-0.19997472	9.08956910	-1.81768404		11.00000000	3.12181818	28.37598208	0.254491
12	-0.18982661	9.08978750	-1.72548355		12.00000000	2.86166667	26.01194190	0.275970
13	-0.18009086	9.07144550	-1.63368442		13.00000000	2.64153846	23.96257219	0.297335
14	-0.16986832	9.09836200	-1.54552347		14.00000000	2.45285714	22.31698222	0.318686
15	-0.16002762	9.07917880	-1.45291937		15.00000000	2.28933333	20.78526667	0.340056
16	-0.14996511	9.08995440	-1.36317601		16.00000000	2.14625000	19.50931463	0.361526
17	-0.13983265	9.07948300	-1.26960817		17.00000000	2.02000000	18.34055566	0.382914
18	-0.12999268	9.09257130	-1.18196771		18.00000000	1.90777778	17.34660547	0.404283
19	-0.11980811	9.08212950	-1.08811277		19.00000000	1.80736842	16.41475405	0.425638
20	-0.10995624	9.09047320	-0.99955425		20.00000000	1.71700000	15.60834248	0.447121
21	-0.09978952	9.08669660	-0.90675712		21.00000000	1.63523810	14.85891244	0.468495
22	-0.08999423	9.08880810	-0.81794028		22.00000000	1.56090909	14.18680319	0.489886
23	-0.07986101	9.08763120	-0.72574739		23.00000000	1.49304348	13.56822850	0.511235
24	-0.07002477	9.07868190	-0.63573264		24.00000000	1.43083333	12.99008069	0.532707
25	-0.05984541	9.08523180	-0.54370939		25.00000000	1.37360000	12.47947440	0.554088
26	-0.04973005	9.09000970	-0.45204665		26.00000000	1.32076923	12.00580512	0.575467
27	-0.03990870	9.08296390	-0.36248931		27.00000000	1.27185185	11.55218446	0.596941
28	-0.02973529	9.09605030	-0.27047370		28.00000000	1.22642857	11.15565598	0.618334
29	-0.01990576	9.07594680	-0.18066357		29.00000000	1.18413793	10.74717287	0.639687
30	-0.00982910	9.08413700	-0.08928894		30.00000000	1.14466667	10.39830882	0.661066
31	-0.00058163	9.08446220	-0.00528380		31.00000000	1.10774194	10.06323974	0.682659
32	0.00958785	9.08509830	0.08710656		32.00000000	1.07312500	9.74944611	0.704026
33	0.01935831	9.07578950	0.17569192		33.00000000	1.04060606	9.44432156	0.725370
34	0.02951729	9.08546830	0.26817838		34.00000000	1.01000000	9.17632298	0.746742
35	0.03931826	9.08067420	0.35703631		35.00000000	0.98114286	8.90943863	0.768256
36	0.04946161	9.08532050	0.44937459		36.00000000	0.95388889	8.66638628	0.789636
37	0.05929161	9.08810040	0.53884810		37.00000000	0.92810811	8.43473967	0.810992
38	0.06942900	9.08623790	0.63084844		38.00000000	0.90368421	8.21108972	0.832370
39	0.07953365	9.08771800	0.72277939		39.00000000	0.88051282	8.00185221	0.853851
40	0.08939045	9.09079070	0.81262986		40.00000000	0.85850000	7.80444382	0.875231
41	0.09952710	9.08841230	0.90454330		41.00000000	0.83756098	7.61209947	0.896587
42	0.10937422	9.08214760	0.99335281		42.00000000	0.81761905	7.42573687	0.917967
43	0.11948482	9.08887290	1.08598234		43.00000000	0.79860465	7.25841617	0.939443
44	0.12933417	9.08544830	1.17505891		44.00000000	0.78045455	7.09077942	0.960815
45	0.13948794	9.09495540	1.26863659		45.00000000	0.76311111	6.94046152	0.982191
46	0.14925095	9.07376670	1.35426830		46.00000000	0.74652174	6.77376410	1.003563
47	0.15945609	9.08159350	1.44811539		47.00000000	0.73063830	6.63536002	1.025026
48	0.16955850	9.08497620	1.54043494		48.00000000	0.71541667	6.49954339	1.046409
49	0.17939371	9.08228300	1.62930444		49.00000000	0.70081633	6.36501221	1.067769
50	0.18951696	9.08688350	1.72211854		50.00000000	0.68680000	6.24087159	1.089133
51	0.19931199	9.07943920	1.80964110		51.00000000	0.67333333	6.11348906	1.110599
52	0.20944118	9.08503630	1.90278072		52.00000000	0.66038462	5.99961820	1.131974
53	0.21931510	9.09280780	1.99419005		53.00000000	0.64792453	5.89145320	1.153366
54	0.22943166	9.07969950	2.08317053		54.00000000	0.63592593	5.77401631	1.174713
55	0.23927356	9.08117960	2.17288617		55.00000000	0.62436364	5.66995832	1.196183
56	0.24945636	9.08184240	2.26552335		56.00000000	0.61321429	5.56911550	1.217565
57	0.25959152	9.08553890	2.35852885		57.00000000	0.60245614	5.47363870	1.238940
58	0.26945576	9.07861520	2.44628516		58.00000000	0.59206897	5.37516631	1.260410
59	0.27956712	9.08831020	2.54079271		59.00000000	0.58203390	5.28970461	1.281802
60	0.28936660	9.07319640	2.62547999		60.00000000	0.57233333	5.19289274	1.303153
61	0.29949209	9.08886620	2.72204353		61.00000000	0.56295082	5.11658468	1.324527
62	0.30934218	9.08282380	2.80970051		62.00000000	0.55387097	5.03071241	1.346021
63	0.31951901	9.09123610	2.90482276		63.00000000	0.54507937	4.95544520	1.367388
64	0.32933712	9.08360960	2.99156982		64.00000000	0.53656250	4.87392428	1.388736
65	0.33942315	9.08771990	3.08458251		65.00000000	0.52830769	4.80111233	1.410132
66	0.34928441	9.08200450	3.17220258		66.00000000	0.52030303	4.72539446	1.431612
67	0.35942999	9.08608910	3.26581291		67.00000000	0.51253731	4.65695970	1.453003
68	0.36960238	9.08341120	3.35725040		68.00000000	0.50500000	4.58712266	1.474343
69	0.37938547	9.09120940	3.44907275		69.00000000	0.49768116	4.52452363	1.495714
70	0.38956755	9.07744500	3.53627801		70.00000000	0.49057143	4.45313516	1.517214
71	0.39941466	9.08394810	3.62826204		71.00000000	0.48366197	4.39356025	1.538587
72	0.40950367	9.07833770	3.71761261		72.00000000	0.47694444	4.32986273	1.559926
73	0.41939396	9.08258820	3.80918263		73.00000000	0.47041096	4.27254902	1.581310
74	0.42946735	9.09257600	3.90496452		74.00000000	0.46405405	4.21944675	1.602796
75	0.43928766	9.06815340	3.98352789		75.00000000	0.45786667	4.15200517	1.624166
76	0.44947717	9.08931540	4.08543976		76.00000000	0.45184211	4.10693541	1.645546
77	0.45963019	9.07246210	4.16997748		77.00000000	0.44597403	4.04608245	1.666921
78	0.46943787	9.07108690	4.25831171		78.00000000	0.44025641	3.99360416	1.688402
79	0.47959387	9.06564810	4.34782926		79.00000000	0.43468354	3.94068805	1.709782
80	0.48940974	9.06272600	4.43538638		80.00000000	0.42925000	3.89017514	1.731139
81	0.49953669	9.04467960	4.51814931		81.00000000	0.42395062	3.83449750	1.752508
82	0.50937939	9.04410080	4.60687855		82.00000000	0.41878049	3.78749294	1.773985
83	0.51951081	9.00440500	4.67788574		83.00000000	0.41373494	3.72543696	1.795343
84	0.52930433	8.99347500	4.76028526		84.00000000	0.40880952	3.67661823	1.816734
85	0.53941196	8.94865230	4.82701008		85.00000000	0.40400000	3.61525553	1.838073
86	0.54959774	8.87981130	4.88032422		86.00000000	0.39930233	3.54572930	1.859546
87	0.55936295	8.80547330	4.92545552		87.00000000	0.39471264	3.47563165	1.880932
88	0.56950855	8.67588330	4.94098972		88.00000000	0.39022727	3.38556628	1.902311
89	0.57935715	8.51938250	4.93576516		89.00000000	0.38584270	3.28714152	1.923780
90	0.58952808	8.27872370	4.88054009		90.00000000	0.38155556	3.15879302	1.945218
91	0.59928364	7.98131420	4.78307103		91.00000000	0.37736264	3.01184978	1.966575
92	0.60943741	7.51791290	4.58169737		92.00000000	0.37326087	2.80614271	1.988049
93	0.61916471	6.95161200	4.30419283		93.00000000	0.36924731	2.56686404	2.009576
94	0.62928796	6.16685100	3.88072509		94.00000000	0.36531915	2.25286876	2.030964
95	0.63944691	5.12758400	3.27881774		95.00000000	0.36147368	1.85348668	2.052320
96	0.64918834	3.87917450	2.51831485		96.00000000	0.35770833	1.38761305	2.073690
97	0.65930116	2.24496220	1.48010618		97.00000000	0.35402062	0.79476291	2.095167
98	0.66898155	0.31505862	0.21076840		98.00000000	0.35040816	0.11039911	2.116551
99	0.67913461	-2.06551960	-1.40276585		99.00000000	0.34686869	-0.71646407	2.137948
100	0.68884182	-4.78423690	-3.29558245		100.00000000	0.34340000	-1.64290695	2.159333
101	0.69912136	-8.10166840	-5.66404943		101.00000000	0.34000000	-2.75456726	2.180829
00:40 03/04/2018
Test Lot:	JK-PERC
Recipe:	Recipe_YJX-LID
Cell Name:	1-20-2-40min
Test Order:	4
Test Condition:	Light
1	-0.29983553	9.09593870	-2.72728560		1.00000000	34.34000000	312.35453496	0.000000
2	-0.29000682	9.09397320	-2.63731425		2.00000000	17.17000000	156.14351984	0.061788
3	-0.27989301	9.08358290	-2.54243136		3.00000000	11.44666667	103.97674560	0.083203
4	-0.27003601	9.09663110	-2.45641797		4.00000000	8.58500000	78.09457799	0.104704
5	-0.25990584	9.07715800	-2.35920637		5.00000000	6.86800000	62.34192114	0.126081
6	-0.24966849	9.08735750	-2.26882683		6.00000000	5.72333333	52.00997609	0.147427
7	-0.23995142	9.08859440	-2.18082113		7.00000000	4.90571429	44.58604739	0.168813
8	-0.22976243	9.09362220	-2.08937273		8.00000000	4.29250000	39.03437329	0.190296
9	-0.21993819	9.08121010	-1.99730491		9.00000000	3.81555556	34.64986165	0.211728
10	-0.20976633	9.09620760	-1.90807809		10.00000000	3.43400000	31.23637690	0.233092
11	-0.19996811	9.07431600	-1.81457382		11.00000000	3.12181818	28.32836468	0.254477
12	-0.18982083	9.10680960	-1.72866216		12.00000000	2.86166667	26.06065347	0.275952
13	-0.18010300	9.08743760	-1.63667477		13.00000000	2.64153846	24.00481594	0.297322
14	-0.16994679	9.07375240	-1.54205509		14.00000000	2.45285714	22.25661839	0.318658
15	-0.16009870	9.08898160	-1.45513414		15.00000000	2.28933333	20.80770854	0.340040
16	-0.14993207	9.10205650	-1.36469017		16.00000000	2.14625000	19.53528876	0.361519
17	-0.13978031	9.07744500	-1.26884808		17.00000000	2.02000000	18.33643890	0.382888
18	-0.12996349	9.09076880	-1.18146804		18.00000000	1.90777778	17.34316670	0.404258
19	-0.11981843	9.07871150	-1.08779696		19.00000000	1.80736842	16.40857647	0.425622
20	-0.10995547	9.09521480	-1.00006862		20.00000000	1.71700000	15.61648381	0.447106
21	-0.09984911	9.07979680	-0.90660965		21.00000000	1.63523810	14.84762962	0.468503
22	-0.09007175	9.08850960	-0.81861799		22.00000000	1.56090909	14.18633726	0.489887
23	-0.07989543	9.08418370	-0.72578475		23.00000000	1.49304348	13.56308123	0.511233
24	-0.07003322	9.08312420	-0.63612039		24.00000000	1.43083333	12.99643688	0.532701
25	-0.05994249	9.09558490	-0.54521199		25.00000000	1.37360000	12.49369542	0.554079
26	-0.04974607	9.08018020	-0.45170328		26.00000000	1.32076923	11.99282262	0.575471
27	-0.03995382	9.08674530	-0.36305019		27.00000000	1.27185185	11.55699384	0.596949
28	-0.02973210	9.07812120	-0.26991156		28.00000000	1.22642857	11.13366721	0.618327
29	-0.01994654	9.09219740	-0.18135790		29.00000000	1.18413793	10.76641582	0.639691
30	-0.00979032	9.08290860	-0.08892456		30.00000000	1.14466667	10.39690271	0.661066
31	-0.00059724	9.09033010	-0.00542912		31.00000000	1.10774194	10.06973986	0.682661
32	0.00949923	9.07127380	0.08617010		32.00000000	1.07312500	9.73461070	0.704048
33	0.01930237	9.10576440	0.17576280		33.00000000	1.04060606	9.47551362	0.725416
34	0.02940918	9.07448480	0.26687314		34.00000000	1.01000000	9.16522965	0.746792
35	0.03929121	9.09062190	0.35718153		35.00000000	0.98114286	8.91919874	0.768275
36	0.04946649	9.08055880	0.44918341		36.00000000	0.95388889	8.66184414	0.789647
37	0.05931280	9.08322620	0.53875160		37.00000000	0.92810811	8.43021588	0.811008
38	0.06945162	9.08578110	0.63102217		38.00000000	0.90368421	8.21067692	0.832385
39	0.07955843	9.08419900	0.72272463		39.00000000	0.88051282	7.99875368	0.853856
40	0.08937422	9.08759500	0.81219673		40.00000000	0.85850000	7.80170031	0.875241
41	0.09954802	9.07936100	0.90383240		41.00000000	0.83756098	7.60451846	0.896584
42	0.10936753	9.09065720	0.99422272		42.00000000	0.81761905	7.43269448	0.917957
43	0.11949965	9.08411880	1.08554902		43.00000000	0.79860465	7.25461953	0.939441
44	0.12933703	9.08352090	1.17483562		44.00000000	0.78045455	7.08927518	0.960822
45	0.13946319	9.08779810	1.26741331		45.00000000	0.76311111	6.93499971	0.982179
46	0.14934075	9.07780080	1.35568558		46.00000000	0.74652174	6.77677564	1.003559
47	0.15944384	9.09877110	1.45074300		47.00000000	0.73063830	6.64791063	1.025028
48	0.16960499	9.07871530	1.53979542		48.00000000	0.71541667	6.49506424	1.046406
49	0.17939398	9.08827880	1.63038251		49.00000000	0.70081633	6.36921416	1.067784
50	0.18955140	9.08147340	1.72140600		50.00000000	0.68680000	6.23715593	1.089142
51	0.19935231	9.09315010	1.81274048		51.00000000	0.67333333	6.12272107	1.110680
52	0.20947921	9.07519530	1.90106474		52.00000000	0.66038462	5.99311936	1.132059
53	0.21928161	9.09041690	1.99336125		53.00000000	0.64792453	5.88990408	1.153440
54	0.22943754	9.08499620	2.08443918		54.00000000	0.63592593	5.77738462	1.174794
55	0.23925854	9.08711050	2.17416879		55.00000000	0.62436364	5.67366136	1.196261
56	0.24941149	9.08147050	2.26502309		56.00000000	0.61321429	5.56888745	1.217650
57	0.25955030	9.08983420	2.35926919		57.00000000	0.60245614	5.47622643	1.239043
58	0.26937801	9.07943250	2.44579946		58.00000000	0.59206897	5.37565021	1.260525
59	0.27948853	9.09269620	2.54130429		59.00000000	0.58203390	5.29225742	1.281900
60	0.28930137	9.08247470	2.62757237		60.00000000	0.57233333	5.19820302	1.303256
61	0.29951906	9.08568570	2.72133604		61.00000000	0.56295082	5.11479421	1.324632
62	0.30926415	9.06510070	2.80351066		62.00000000	0.55387097	5.02089610	1.346122
63	0.31944689	9.08619310	2.90255613		63.00000000	0.54507937	4.95269637	1.367517
64	0.32930586	9.08640670	2.99220697		64.00000000	0.53656250	4.87542509	1.388866
65	0.33942306	9.08622840	3.08407545		65.00000000	0.52830769	4.80032436	1.410234
66	0.34922695	9.08208080	3.17170738		66.00000000	0.52030303	4.72543416	1.431716
67	0.35943127	9.09300990	3.26831210		67.00000000	0.51253731	4.66050687	1.453100
68	0.36959243	9.07716270	3.35485062		68.00000000	0.50500000	4.58396716	1.474469
69	0.37938067	9.08216760	3.44559883		69.00000000	0.49768116	4.52002370	1.495847
70	0.38956338	9.09088230	3.54147484		70.00000000	0.49057143	4.45972712	1.517317
71	0.39934719	9.08429720	3.62778856		71.00000000	0.48366197	4.39372910	1.538733
72	0.40949047	9.09036350	3.72241722		72.00000000	0.47694444	4.33559837	1.560075
73	0.41935167	9.06847380	3.80287963		73.00000000	0.47041096	4.26590946	1.581442
74	0.42950162	9.09087370	3.90454498		74.00000000	0.46405405	4.21865680	1.602927
75	0.43929732	9.07414250	3.98624648		75.00000000	0.45786667	4.15474738	1.624293
76	0.44942051	9.07462980	4.07832475		76.00000000	0.45184211	4.10029983	1.645637
77	0.45960027	9.07470130	4.17073517		77.00000000	0.44597403	4.04708107	1.667005
78	0.46942425	9.06873890	4.25708596		78.00000000	0.44025641	3.99257043	1.688485
79	0.47954446	9.05911160	4.34424678		79.00000000	0.43468354	3.93784674	1.709918
80	0.48944360	9.05563740	4.43222377		80.00000000	0.42925000	3.88713235	1.731298
81	0.49957201	9.04148390	4.51687229		81.00000000	0.42395062	3.83314268	1.752659
82	0.50935429	9.03561690	4.60233023		82.00000000	0.41878049	3.78394005	1.774136
83	0.51952291	9.01518730	4.68359634		83.00000000	0.41373494	3.72989797	1.795508
84	0.52927989	8.98252010	4.75426725		84.00000000	0.40880952	3.67213976	1.816889
85	0.53939563	8.94776730	4.82638658		85.00000000	0.40400000	3.61489799	1.838245
86	0.54955673	8.87086870	4.87504560		86.00000000	0.39930233	3.54215850	1.859720
87	0.55937254	8.80738260	4.92660798		87.00000000	0.39471264	3.47638527	1.881088
88	0.56953371	8.67267700	4.93938191		88.00000000	0.39022727	3.38431509	1.902480
89	0.57938373	8.52105430	4.93696022		89.00000000	0.38584270	3.28778657	1.923951
90	0.58947492	8.26577950	4.87246971		90.00000000	0.38155556	3.15385409	1.945335
91	0.59924680	7.95201590	4.76522008		91.00000000	0.37736264	3.00079369	1.966711
92	0.60937518	7.50871900	4.57562699		92.00000000	0.37326087	2.80271098	1.988187
93	0.61915153	6.93120620	4.29146692		93.00000000	0.36924731	2.55932926	2.009691
94	0.62925166	6.13930130	3.86316553		94.00000000	0.36531915	2.24280433	2.031076
95	0.63939714	5.11226650	3.26876858		95.00000000	0.36147368	1.84794981	2.052434
96	0.64921296	3.84910610	2.49888956		96.00000000	0.35770833	1.37685733	2.073808
97	0.65928775	2.22690870	1.46817363		97.00000000	0.35402062	0.78837160	2.095282
98	0.66909015	0.31073201	0.20790773		98.00000000	0.35040816	0.10888303	2.116651
99	0.67917687	-2.03647020	-1.38312346		99.00000000	0.34686869	-0.70638774	2.138009
100	0.68882740	-4.72072080	-3.25176183		100.00000000	0.34340000	-1.62109552	2.159384
101	0.69901609	-7.95399190	-5.55996832		101.00000000	0.34000000	-2.70435725	2.180858
