# Supplementary material for: Study on the Electrical Injection Regeneration of Industrialized B-Doped Czochralski Silicon PERC Solar Cells
Source: Hindawi journal article supplement (doi:10.1155/2019/5357370), 2019-06-20
Supplement: f1 [file 5357370.f1.zip › section3.1/IVRawData_1-20-2-50min.csv]

00:54 03/04/2018
Test Lot:	JK-PERC
Recipe:	Recipe_YJX-LID
Cell Name:	1-20-2-50min
Test Order:	2
Test Condition:	Light
1	-0.29974601	9.09235950	-2.72539848		1.00000000	34.34000000	312.23162523	0.000000
2	-0.28995439	9.08664700	-2.63471319		2.00000000	17.17000000	156.01772899	0.061732
3	-0.27979288	9.08644200	-2.54232178		3.00000000	11.44666667	104.00947276	0.083106
4	-0.27000350	9.08153250	-2.45204556		4.00000000	8.58500000	77.96495651	0.104606
5	-0.25978094	9.09322070	-2.36224542		5.00000000	6.86800000	62.45223977	0.125986
6	-0.24961570	9.08281230	-2.26721255		6.00000000	5.72333333	51.98396240	0.147367
7	-0.23986207	9.08672430	-2.17956050		7.00000000	4.90571429	44.57687321	0.168721
8	-0.22967449	9.08120060	-2.08572012		8.00000000	4.29250000	38.98105358	0.190231
9	-0.21988513	9.08358000	-1.99734417		9.00000000	3.81555556	34.65890413	0.211619
10	-0.20974593	9.09135340	-1.90687437		10.00000000	3.43400000	31.21970758	0.233053
11	-0.19990000	9.07776070	-1.81464436		11.00000000	3.12181818	28.33911840	0.254539
12	-0.18977420	9.07598210	-1.72238724		12.00000000	2.86166667	25.97243544	0.275936
13	-0.18003693	9.08664420	-1.63593153		13.00000000	2.64153846	24.00272014	0.297283
14	-0.16984935	9.08363530	-1.54284955		14.00000000	2.45285714	22.28085973	0.318659
15	-0.15999597	9.08165930	-1.45302889		15.00000000	2.28933333	20.79094536	0.340144
16	-0.14987168	9.08479980	-1.36155421		16.00000000	2.14625000	19.49825157	0.361519
17	-0.13972726	9.09136010	-1.27031084		17.00000000	2.02000000	18.36454740	0.382855
18	-0.12990589	9.08234020	-1.17984949		18.00000000	1.90777778	17.32708680	0.404232
19	-0.11971980	9.07584670	-1.08655855		19.00000000	1.80736842	16.40339872	0.425715
20	-0.10993788	9.09504320	-0.99988977		20.00000000	1.71700000	15.61618917	0.447097
21	-0.09974510	9.08030890	-0.90571627		21.00000000	1.63523810	14.84846703	0.468454
22	-0.08999071	9.08353140	-0.81743347		22.00000000	1.56090909	14.17856674	0.489828
23	-0.07980686	9.08358000	-0.72493197		23.00000000	1.49304348	13.56217988	0.511298
24	-0.06999666	9.07730010	-0.63538064		24.00000000	1.43083333	12.98810356	0.532681
25	-0.05983066	9.09421540	-0.54411293		25.00000000	1.37360000	12.49181427	0.554015
26	-0.04965052	9.08133220	-0.45089290		26.00000000	1.32076923	11.99434414	0.575392
27	-0.03981576	9.09206580	-0.36200748		27.00000000	1.27185185	11.56376072	0.596880
28	-0.02968922	9.08110520	-0.26961088		28.00000000	1.22642857	11.13732688	0.618249
29	-0.01990729	9.07030490	-0.18056523		29.00000000	1.18413793	10.74049208	0.639611
30	-0.00971972	9.08209510	-0.08827538		30.00000000	1.14466667	10.39597152	0.660981
31	-0.00057940	9.08981610	-0.00526667		31.00000000	1.10774194	10.06917048	0.682569
32	0.00959680	9.07136250	0.08705604		32.00000000	1.07312500	9.73470588	0.703972
33	0.01941863	9.09162040	0.17654684		33.00000000	1.04060606	9.46079529	0.725339
34	0.02952033	9.08075140	0.26806673		34.00000000	1.01000000	9.17155891	0.746707
35	0.03932132	9.08738330	0.35732789		35.00000000	0.98114286	8.91602121	0.768195
36	0.04950637	9.07015990	0.44903073		36.00000000	0.95388889	8.65192475	0.789620
37	0.05937808	9.09601120	0.54010364		37.00000000	0.92810811	8.44208175	0.811015
38	0.06947679	9.08037760	0.63087550		38.00000000	0.90368421	8.20579386	0.832371
39	0.07961644	9.07059000	0.72216810		39.00000000	0.88051282	7.98677078	0.853855
40	0.08941818	9.07973000	0.81189293		40.00000000	0.85850000	7.79494821	0.875241
41	0.09953923	9.09626480	0.90543518		41.00000000	0.83756098	7.61867642	0.896616
42	0.10939456	9.07101920	0.99232015		42.00000000	0.81761905	7.41663808	0.918091
43	0.11953718	9.08865830	1.08643258		43.00000000	0.79860465	7.25824479	0.939475
44	0.12936944	9.07284160	1.17374844		44.00000000	0.78045455	7.08094047	0.960827
45	0.13949643	9.08751010	1.26767522		45.00000000	0.76311111	6.93477993	0.982208
46	0.14935027	9.07381920	1.35517735		46.00000000	0.74652174	6.77380329	1.003700
47	0.15945198	9.09756470	1.45062470		47.00000000	0.73063830	6.64702919	1.025070
48	0.16965415	9.07569500	1.53972932		48.00000000	0.71541667	6.49290346	1.046410
49	0.17944993	9.08760360	1.63076983		49.00000000	0.70081633	6.36874097	1.067797
50	0.18959405	9.09032340	1.72347123		50.00000000	0.68680000	6.24323411	1.089275
51	0.19936006	9.07102200	1.80839949		51.00000000	0.67333333	6.10782148	1.110710
52	0.20954436	9.08863830	1.90447290		52.00000000	0.66038462	6.00199691	1.132060
53	0.21930741	9.08363150	1.99210770		53.00000000	0.64792453	5.88550765	1.153432
54	0.22949022	9.08511070	2.08494405		54.00000000	0.63592593	5.77745743	1.174906
55	0.23932843	9.09211920	2.17600261		55.00000000	0.62436364	5.67678861	1.196294
56	0.24945469	9.07953450	2.26493246		56.00000000	0.61321429	5.56770026	1.217645
57	0.25960848	9.07545280	2.35606451		57.00000000	0.60245614	5.46756227	1.239024
58	0.26944670	9.08221530	2.44717294		58.00000000	0.59206897	5.37729782	1.260513
59	0.27957442	9.07547950	2.53727192		59.00000000	0.58203390	5.28223671	1.281885
60	0.28944018	9.08241180	2.62881491		60.00000000	0.57233333	5.19816702	1.303246
61	0.29954261	9.07749370	2.71909616		61.00000000	0.56295082	5.11018252	1.324634
62	0.30940911	9.08219150	2.81011279		62.00000000	0.55387097	5.03036220	1.346110
63	0.31952047	9.07610700	2.90000197		63.00000000	0.54507937	4.94719864	1.367496
64	0.32935050	9.08968260	2.99369151		64.00000000	0.53656250	4.87718282	1.388860
65	0.33948493	9.07055660	3.07931727		65.00000000	0.52830769	4.79204483	1.410218
66	0.34930679	9.08129410	3.17215769		66.00000000	0.52030303	4.72502484	1.431707
67	0.35947472	9.08998680	3.26762046		67.00000000	0.51253731	4.65895741	1.453088
68	0.36965531	9.08224200	3.35729898		68.00000000	0.50500000	4.58653221	1.474476
69	0.37944812	9.08227160	3.44625088		69.00000000	0.49768116	4.52007546	1.495817
70	0.38959670	9.09556200	3.54360094		70.00000000	0.49057143	4.46202284	1.517294
71	0.39945796	9.06763840	3.62214034		71.00000000	0.48366197	4.38567187	1.538677
72	0.40958720	9.08991620	3.72311332		72.00000000	0.47694444	4.33538503	1.560058
73	0.41939789	9.07274820	3.80509145		73.00000000	0.47041096	4.26792018	1.581539
74	0.42950255	9.08543210	3.90221625		74.00000000	0.46405405	4.21613160	1.602924
75	0.43932289	9.07187370	3.98548177		75.00000000	0.45786667	4.15370857	1.624277
76	0.44949976	9.08152580	4.08214367		76.00000000	0.45184211	4.10341574	1.645648
77	0.45965207	9.06065080	4.16474690		77.00000000	0.44597403	4.04081492	1.667114
78	0.46949250	9.07362270	4.25999781		78.00000000	0.44025641	3.99472056	1.688487
79	0.47965002	9.06111810	4.34616548		79.00000000	0.43468354	3.93871893	1.709881
80	0.48945549	9.06361960	4.43623837		80.00000000	0.42925000	3.89055871	1.731263
81	0.49958917	9.03553580	4.51405583		81.00000000	0.42395062	3.83062098	1.752752
82	0.50940210	9.03282070	4.60133783		82.00000000	0.41878049	3.78276906	1.774129
83	0.51956701	9.00417230	4.67827088		83.00000000	0.41373494	3.72534068	1.795471
84	0.52933604	8.98392680	4.75551624		84.00000000	0.40880952	3.67271484	1.816849
85	0.53947049	8.93718340	4.82134671		85.00000000	0.40400000	3.61062209	1.838318
86	0.54959744	8.86925410	4.87451935		86.00000000	0.39930233	3.54151379	1.859693
87	0.55941784	8.79107950	4.91788671		87.00000000	0.39471264	3.46995023	1.881030
88	0.56954557	8.66854190	4.93712964		88.00000000	0.39022727	3.38270146	1.902407
89	0.57940608	8.48534010	4.91645764		89.00000000	0.38584270	3.27400651	1.923900
90	0.58953309	8.24643610	4.86154696		90.00000000	0.38155556	3.14647351	1.945280
91	0.59932965	7.91449120	4.74338924		91.00000000	0.37736264	2.98663327	1.966645
92	0.60947895	7.45462750	4.54343854		92.00000000	0.37326087	2.78252074	1.988116
93	0.61928666	6.86235620	4.24976565		93.00000000	0.36924731	2.53390658	2.009619
94	0.62931389	6.06753640	3.81838493		94.00000000	0.36531915	2.21658723	2.031015
95	0.63949150	5.03287790	3.21848264		95.00000000	0.36147368	1.81925292	2.052376
96	0.64922404	3.77234390	2.44909635		96.00000000	0.35770833	1.34939885	2.073745
97	0.65938973	2.15931890	1.42383271		97.00000000	0.35402062	0.76444341	2.095225
98	0.66908431	0.27055621	0.18102492		98.00000000	0.35040816	0.09480510	2.116596
99	0.67914355	-2.05941510	-1.39863848		99.00000000	0.34686869	-0.71434661	2.137991
100	0.68892372	-4.68866780	-3.23013446		100.00000000	0.34340000	-1.61008852	2.159330
101	0.69904327	-7.87418080	-5.50439310		101.00000000	0.34000000	-2.67722147	2.180795
00:54 03/04/2018
Test Lot:	JK-PERC
Recipe:	Recipe_YJX-LID
Cell Name:	1-20-2-50min
Test Order:	3
Test Condition:	Light
1	-0.29978248	9.08236220	-2.72273306		1.00000000	34.34000000	311.88831795	0.000000
2	-0.28998363	9.07933520	-2.63285858		2.00000000	17.17000000	155.89218538	0.061798
3	-0.27981934	9.08307650	-2.54162047		3.00000000	11.44666667	103.97094900	0.083278
4	-0.27003610	9.09656240	-2.45640023		4.00000000	8.58500000	78.09398820	0.104777
5	-0.25988668	9.07237050	-2.35778825		5.00000000	6.86800000	62.30904059	0.126162
6	-0.24970601	9.08750530	-2.26920469		6.00000000	5.72333333	52.01082200	0.147504
7	-0.23985358	9.07529450	-2.17674188		7.00000000	4.90571429	44.52080188	0.168880
8	-0.22973244	9.08623700	-2.08740340		8.00000000	4.29250000	39.00267232	0.190362
9	-0.21985917	9.07769300	-1.99581405		9.00000000	3.81555556	34.63644196	0.211738
10	-0.20973580	9.09115030	-1.90673968		10.00000000	3.43400000	31.21901013	0.233107
11	-0.19992132	9.08129600	-1.81554468		11.00000000	3.12181818	28.35015497	0.254482
12	-0.18975255	9.07953830	-1.72286555		12.00000000	2.86166667	25.98261210	0.275956
13	-0.17996860	9.09087280	-1.63607165		13.00000000	2.64153846	24.01389015	0.297345
14	-0.16984075	9.08199020	-1.54249203		14.00000000	2.45285714	22.27682453	0.318695
15	-0.16003299	9.08254720	-1.45350719		15.00000000	2.28933333	20.79297806	0.340075
16	-0.14986794	9.08515930	-1.36157411		16.00000000	2.14625000	19.49902315	0.361555
17	-0.13970736	9.07740590	-1.26818041		17.00000000	2.02000000	18.33635992	0.382922
18	-0.12991892	9.09208970	-1.18123447		18.00000000	1.90777778	17.34568668	0.404285
19	-0.11975089	9.08139420	-1.08750504		19.00000000	1.80736842	16.41342510	0.425661
20	-0.10996693	9.07646940	-0.99811148		20.00000000	1.71700000	15.58429796	0.447154
21	-0.09978328	9.09515670	-0.90754456		21.00000000	1.63523810	14.87274672	0.468545
22	-0.08994647	9.06175040	-0.81507247		22.00000000	1.56090909	14.14456858	0.489895
23	-0.07980599	9.08538630	-0.72506820		23.00000000	1.49304348	13.56487676	0.511266
24	-0.06998853	9.09525200	-0.63656335		24.00000000	1.43083333	13.01378974	0.532740
25	-0.05987038	9.06545350	-0.54275212		25.00000000	1.37360000	12.45230693	0.554120
26	-0.04971352	9.08412740	-0.45160390		26.00000000	1.32076923	11.99803596	0.575501
27	-0.03989606	9.09239860	-0.36275088		27.00000000	1.27185185	11.56418400	0.596857
28	-0.02975558	9.08542250	-0.27034198		28.00000000	1.22642857	11.14262174	0.618332
29	-0.01993812	9.08082870	-0.18105464		29.00000000	1.18413793	10.75295371	0.639706
30	-0.00977530	9.09019570	-0.08885943		30.00000000	1.14466667	10.40524401	0.661094
31	-0.00060466	9.07853220	-0.00548938		31.00000000	1.10774194	10.05667083	0.682630
32	0.00953264	9.07844070	0.08654155		32.00000000	1.07312500	9.74230168	0.704098
33	0.01931409	9.07799820	0.17533331		33.00000000	1.04060606	9.44661995	0.725461
34	0.02949523	9.06956390	0.26750884		34.00000000	1.01000000	9.16025954	0.746821
35	0.03930794	9.08655070	0.35717356		35.00000000	0.98114286	8.91520432	0.768182
36	0.04948386	9.08088680	0.44935731		36.00000000	0.95388889	8.66215702	0.789672
37	0.05928392	9.07981010	0.53828670		37.00000000	0.92810811	8.42704537	0.811067
38	0.06945240	9.07369420	0.63018982		38.00000000	0.90368421	8.19975418	0.832453
39	0.07957920	9.08793260	0.72321038		39.00000000	0.88051282	8.00204117	0.853816
40	0.08939190	9.08542250	0.81216320		40.00000000	0.85850000	7.79983522	0.875297
41	0.09957601	9.07432840	0.90358542		41.00000000	0.83756098	7.60030335	0.896690
42	0.10938352	9.08295630	0.99352573		42.00000000	0.81761905	7.42639808	0.918094
43	0.11956837	9.09605980	1.08760104		43.00000000	0.79860465	7.26415566	0.939436
44	0.12932973	9.06850620	1.17282746		44.00000000	0.78045455	7.07755688	0.960907
45	0.13946769	9.08175280	1.26661108		45.00000000	0.76311111	6.93038647	0.982275
46	0.14929231	9.08605190	1.35647768		46.00000000	0.74652174	6.78293527	1.003656
47	0.15946302	9.08069990	1.44803583		47.00000000	0.73063830	6.63470712	1.025132
48	0.16962479	9.07937810	1.54008760		48.00000000	0.71541667	6.49553842	1.046518
49	0.17942709	9.08899210	1.63081140		49.00000000	0.70081633	6.36971406	1.067872
50	0.18956728	9.07598400	1.72050960		50.00000000	0.68680000	6.23338581	1.089258
51	0.19934948	9.08005050	1.81010335		51.00000000	0.67333333	6.11390067	1.110735
52	0.20950605	9.08012580	1.90234129		52.00000000	0.66038462	5.99637538	1.132119
53	0.21932025	9.08599380	1.99274243		53.00000000	0.64792453	5.88703825	1.153471
54	0.22943366	9.07800960	2.08280097		54.00000000	0.63592593	5.77294166	1.174843
55	0.23934907	9.08818820	2.17524939		55.00000000	0.62436364	5.67433423	1.196335
56	0.24946918	9.08517070	2.26647008		56.00000000	0.61321429	5.57115646	1.217709
57	0.25953346	9.07789800	2.35601828		57.00000000	0.60245614	5.46903539	1.239058
58	0.26937816	9.08465480	2.44720759		58.00000000	0.59206897	5.37874217	1.260446
59	0.27955261	9.07325170	2.53645119		59.00000000	0.58203390	5.28094006	1.281920
60	0.28938690	9.08416270	2.62883768		60.00000000	0.57233333	5.19916912	1.303368
61	0.29950401	9.08353330	2.72055465		61.00000000	0.56295082	5.11358252	1.324733
62	0.30933905	9.07631590	2.80765894		62.00000000	0.55387097	5.02710787	1.346106
63	0.31949711	9.07860570	2.90058828		63.00000000	0.54507937	4.94856063	1.367583
64	0.32931802	9.08569810	2.99208411		64.00000000	0.53656250	4.87504489	1.388954
65	0.33944631	9.06642150	3.07756332		65.00000000	0.52830769	4.78986022	1.410306
66	0.34927985	9.09293940	3.17598051		66.00000000	0.52030303	4.73108392	1.431681
67	0.35940441	9.07423310	3.26131939		67.00000000	0.51253731	4.65088305	1.453155
68	0.36957884	9.08176610	3.35642858		68.00000000	0.50500000	4.58629188	1.474525
69	0.37941018	9.07911490	3.44470862		69.00000000	0.49768116	4.51850443	1.495895
70	0.38954738	9.07928850	3.53681305		70.00000000	0.49057143	4.45403953	1.517259
71	0.39936307	9.07685180	3.62495940		71.00000000	0.48366197	4.39012804	1.538734
72	0.40954047	9.07904430	3.71823607		72.00000000	0.47694444	4.33019974	1.560128
73	0.41933012	9.07244780	3.80435062		73.00000000	0.47041096	4.26777887	1.581515
74	0.42947626	9.08426280	3.90147521		74.00000000	0.46405405	4.21558898	1.602860
75	0.43932024	9.06552220	3.98266739		75.00000000	0.45786667	4.15080043	1.624336
76	0.44948873	9.07906820	4.08093883		76.00000000	0.45184211	4.10230529	1.645710
77	0.45961255	9.06207280	4.16504239		77.00000000	0.44597403	4.04144909	1.667106
78	0.46950042	9.07329180	4.25991431		78.00000000	0.44025641	3.99457488	1.688594
79	0.47961235	9.05793570	4.34429783		79.00000000	0.43468354	3.93733559	1.709976
80	0.48943248	9.04886050	4.42880624		80.00000000	0.42925000	3.88422337	1.731342
81	0.49956599	9.04249100	4.51732097		81.00000000	0.42395062	3.83356964	1.752719
82	0.50938541	9.02812860	4.59879699		82.00000000	0.41878049	3.78080410	1.774200
83	0.51955760	9.00267120	4.67740624		83.00000000	0.41373494	3.72471963	1.795593
84	0.52927727	8.96704010	4.74605050		84.00000000	0.40880952	3.66581139	1.816947
85	0.53946364	8.93312450	4.81909586		85.00000000	0.40400000	3.60898230	1.838338
86	0.54961574	8.86457820	4.87211171		86.00000000	0.39930233	3.53964669	1.859833
87	0.55943292	8.77401160	4.90847093		87.00000000	0.39471264	3.46321331	1.881209
88	0.56955373	8.64758010	4.92526150		88.00000000	0.39022727	3.37452160	1.902598
89	0.57934189	8.46936040	4.90665526		89.00000000	0.38584270	3.26784086	1.923976
90	0.58948207	8.22677420	4.84953588		90.00000000	0.38155556	3.13897140	1.945461
91	0.59926724	7.88366460	4.72442193		91.00000000	0.37736264	2.97500047	1.966844
92	0.60939109	7.43651820	4.53174793		92.00000000	0.37326087	2.77576125	1.988303
93	0.61916882	6.83350420	4.23109273		93.00000000	0.36924731	2.52325306	2.009706
94	0.62925911	6.03657390	3.79856912		94.00000000	0.36531915	2.20527604	2.031210
95	0.63938373	4.99673270	3.19482959		95.00000000	0.36147368	1.80618738	2.052597
96	0.64920759	3.75330590	2.43667468		96.00000000	0.35770833	1.34258880	2.073972
97	0.65932173	2.14812300	1.41630417		97.00000000	0.35402062	0.76047983	2.095391
98	0.66903323	0.28045806	0.18763576		98.00000000	0.35040816	0.09827479	2.116890
99	0.67912054	-2.01603150	-1.36912840		99.00000000	0.34686869	-0.69929820	2.138265
100	0.68880826	-4.58733180	-3.15979204		100.00000000	0.34340000	-1.57528974	2.159642
101	0.69904447	-7.70583720	-5.38672288		101.00000000	0.34000000	-2.61998465	2.181006
00:55 03/04/2018
Test Lot:	JK-PERC
Recipe:	Recipe_YJX-LID
Cell Name:	1-20-2-50min
Test Order:	4
Test Condition:	Light
1	-0.29979202	9.07549480	-2.72076092		1.00000000	34.34000000	311.65249143	0.000000
2	-0.29000717	9.06898500	-2.63007067		2.00000000	17.17000000	155.71447245	0.061825
3	-0.27985537	9.09079460	-2.54410769		3.00000000	11.44666667	104.05929552	0.083256
4	-0.27001768	9.07452490	-2.45028216		4.00000000	8.58500000	77.90479627	0.104608
5	-0.25985622	9.09421060	-2.36318719		5.00000000	6.86800000	62.45903840	0.126095
6	-0.24975950	9.07857230	-2.26745968		6.00000000	5.72333333	51.95969546	0.147471
7	-0.23992032	9.08019260	-2.17852271		7.00000000	4.90571429	44.54483055	0.168901
8	-0.22978342	9.08674430	-2.08798318		8.00000000	4.29250000	39.00484991	0.190321
9	-0.21992710	9.07737060	-1.99635979		9.00000000	3.81555556	34.63521182	0.211780
10	-0.20975372	9.08496000	-1.90560416		10.00000000	3.43400000	31.19775264	0.233159
11	-0.19996293	9.08940600	-1.81754426		11.00000000	3.12181818	28.37547291	0.254527
12	-0.18983495	9.08130740	-1.72394954		12.00000000	2.86166667	25.98767468	0.275898
13	-0.18003969	9.09604450	-1.63764903		13.00000000	2.64153846	24.02755139	0.297375
14	-0.16987821	9.06715110	-1.54031140		14.00000000	2.45285714	22.24042634	0.318762
15	-0.16007029	9.10044670	-1.45671114		15.00000000	2.28933333	20.83395598	0.340117
16	-0.14988127	9.08051780	-1.36099954		16.00000000	2.14625000	19.48906133	0.361478
17	-0.13975777	9.08524420	-1.26973347		17.00000000	2.02000000	18.35219328	0.382942
18	-0.12991710	9.08044240	-1.17970474		18.00000000	1.90777778	17.32346622	0.404301
19	-0.11976753	9.08630660	-1.08824450		19.00000000	1.80736842	16.42230361	0.425691
20	-0.10994101	9.09020330	-0.99938613		20.00000000	1.71700000	15.60787907	0.447028
21	-0.09980335	9.06789300	-0.90500611		21.00000000	1.63523810	14.82816408	0.468492
22	-0.08995821	9.08450320	-0.81722567		22.00000000	1.56090909	14.18008363	0.489871
23	-0.07981312	9.08715630	-0.72527425		23.00000000	1.49304348	13.56751945	0.511245
24	-0.07000222	9.06967540	-0.63489742		24.00000000	1.43083333	12.97719388	0.532739
25	-0.05985787	9.09652330	-0.54449849		25.00000000	1.37360000	12.49498440	0.554116
26	-0.04973287	9.09074780	-0.45210896		26.00000000	1.32076923	12.00677998	0.575460
27	-0.03989964	9.08076000	-0.36231905		27.00000000	1.27185185	11.54938142	0.596855
28	-0.02973817	9.07414150	-0.26984835		28.00000000	1.22642857	11.12878640	0.618334
29	-0.01989527	9.07582860	-0.18056603		29.00000000	1.18413793	10.74703290	0.639716
30	-0.00977101	9.08737470	-0.08879283		30.00000000	1.14466667	10.40201491	0.661069
31	-0.00058609	9.07053850	-0.00531613		31.00000000	1.10774194	10.04781587	0.682563
32	0.00947767	9.08447650	0.08609968		32.00000000	1.07312500	9.74877884	0.704035
33	0.01933369	9.08354470	0.17561844		33.00000000	1.04060606	9.45239167	0.725417
34	0.02947180	9.07926460	0.26758227		34.00000000	1.01000000	9.17005725	0.746771
35	0.03928242	9.08098030	0.35672287		35.00000000	0.98114286	8.90973896	0.768152
36	0.04945328	9.08337120	0.44920247		36.00000000	0.95388889	8.66452686	0.789636
37	0.05928771	9.08068940	0.53837330		37.00000000	0.92810811	8.42786146	0.811014
38	0.06940870	9.08484840	0.63056752		38.00000000	0.90368421	8.20983405	0.832373
39	0.07956617	9.07760910	0.72227055		39.00000000	0.88051282	7.99295119	0.853747
40	0.08938050	9.07525440	0.81115080		40.00000000	0.85850000	7.79110590	0.875231
41	0.09954243	9.07770440	0.90361677		41.00000000	0.83756098	7.60313095	0.896610
42	0.10933369	9.07603740	0.99231666		42.00000000	0.81761905	7.42074106	0.917949
43	0.11947180	9.08824630	1.08578914		43.00000000	0.79860465	7.25791577	0.939317
44	0.12930550	9.08692070	1.17498882		44.00000000	0.78045455	7.09192856	0.960803
45	0.13944435	9.09164710	1.26777882		45.00000000	0.76311111	6.93793692	0.982189
46	0.14929590	9.07387920	1.35469296		46.00000000	0.74652174	6.77384808	1.003548
47	0.15944815	9.07355400	1.44676140		47.00000000	0.73063830	6.62948605	1.024943
48	0.16956095	9.08162780	1.53988944		48.00000000	0.71541667	6.49714789	1.046417
49	0.17942740	9.08508870	1.63011384		49.00000000	0.70081633	6.36697849	1.067788
50	0.18953276	9.08985810	1.72282589		50.00000000	0.68680000	6.24291454	1.089181
51	0.19935231	9.07978340	1.81007580		51.00000000	0.67333333	6.11372082	1.110526
52	0.20947924	9.08965110	1.90409320		52.00000000	0.66038462	6.00266575	1.131997
53	0.21930252	9.07210540	1.98953558		53.00000000	0.64792453	5.87803961	1.153378
54	0.22947709	9.08575250	2.08497204		54.00000000	0.63592593	5.77786557	1.174755
55	0.23926391	9.08289050	2.17320790		55.00000000	0.62436364	5.67102654	1.196246
56	0.24940127	9.08856490	2.26669963		56.00000000	0.61321429	5.57323783	1.217627
57	0.25956467	9.07614040	2.35584539		57.00000000	0.60245614	5.46797651	1.238966
58	0.26940507	9.07954120	2.44607443		58.00000000	0.59206897	5.37571457	1.260346
59	0.27954468	9.08347320	2.53923661		59.00000000	0.58203390	5.28688932	1.281841
60	0.28939772	9.07730870	2.62695244		60.00000000	0.57233333	5.19524635	1.303223
61	0.29953581	9.06573870	2.71551338		61.00000000	0.56295082	5.10356503	1.324591
62	0.30931666	9.08694460	2.81074335		62.00000000	0.55387097	5.03299480	1.345964
63	0.31950688	9.08527370	2.90280745		63.00000000	0.54507937	4.95219522	1.367438
64	0.32930708	9.07529260	2.98855811		64.00000000	0.53656250	4.86946169	1.388837
65	0.33942732	9.08512880	3.08374092		65.00000000	0.52830769	4.79974343	1.410177
66	0.34926474	9.08136370	3.17180013		66.00000000	0.52030303	4.72506105	1.431544
67	0.35942072	9.06744960	3.25902926		67.00000000	0.51253731	4.64740626	1.453017
68	0.36956775	9.07702160	3.35457445		68.00000000	0.50500000	4.58389591	1.474397
69	0.37939399	9.08366680	3.44628859		69.00000000	0.49768116	4.52076982	1.495755
70	0.38953805	9.08398060	3.53855609		70.00000000	0.49057143	4.45634134	1.517132
71	0.39934719	9.08219530	3.62694917		71.00000000	0.48366197	4.39271249	1.538610
72	0.40952250	9.06904320	3.71397724		72.00000000	0.47694444	4.32542977	1.559993
73	0.41932344	9.08672430	3.81027649		73.00000000	0.47041096	4.27449469	1.581342
74	0.42948464	9.08255390	3.90081739		74.00000000	0.46405405	4.21479596	1.602719
75	0.43927515	9.08172420	3.98937576		75.00000000	0.45786667	4.15821879	1.624197
76	0.44944975	9.07485870	4.07869297		76.00000000	0.45184211	4.10040326	1.645556
77	0.45958784	9.07222560	4.16948457		77.00000000	0.44597403	4.04597698	1.666951
78	0.46943641	9.06927870	4.25744963		78.00000000	0.44025641	3.99280808	1.688313
79	0.47958496	9.05926900	4.34468916		79.00000000	0.43468354	3.93791516	1.709792
80	0.48941121	9.06365780	4.43585573		80.00000000	0.42925000	3.89057511	1.731168
81	0.49952549	9.02996160	4.51069599		81.00000000	0.42395062	3.82825779	1.752542
82	0.50934803	9.03250120	4.60068669		82.00000000	0.41878049	3.78263526	1.773894
83	0.51951963	8.99637890	4.67379544		83.00000000	0.41373494	3.72211628	1.795367
84	0.52929598	8.98328690	4.75481764		84.00000000	0.40880952	3.67245324	1.816735
85	0.53943932	8.92283150	4.81332616		85.00000000	0.40400000	3.60482393	1.838160
86	0.54958564	8.86908630	4.87432247		86.00000000	0.39930233	3.54144679	1.859654
87	0.55942523	8.77700140	4.91007603		87.00000000	0.39471264	3.46439343	1.881050
88	0.56952465	8.65551280	4.92952790		88.00000000	0.39022727	3.37761715	1.902400
89	0.57932782	8.48521040	4.91571844		89.00000000	0.38584270	3.27395646	1.923781
90	0.58944809	8.23195170	4.85230821		90.00000000	0.38155556	3.14094690	1.945258
91	0.59924382	7.89591170	4.73157629		91.00000000	0.37736264	2.97962206	1.966634
92	0.60938865	7.44017700	4.53395942		92.00000000	0.37326087	2.77712694	1.988105
93	0.61918062	6.85668230	4.24552480		93.00000000	0.36924731	2.53181151	2.009508
94	0.62930387	6.05137250	3.80815213		94.00000000	0.36531915	2.21068225	2.031035
95	0.63940179	5.01198290	3.20467084		95.00000000	0.36147368	1.81169992	2.052414
96	0.64918339	3.76184130	2.44212489		96.00000000	0.35770833	1.34564198	2.073768
97	0.65931851	2.15065650	1.41796764		97.00000000	0.35402062	0.76137674	2.095138
98	0.66900629	0.28100079	0.18799130		98.00000000	0.35040816	0.09846497	2.116623
99	0.67913771	-2.03112550	-1.37941392		99.00000000	0.34686869	-0.70453384	2.138004
100	0.68883145	-4.63466840	-3.19250535		100.00000000	0.34340000	-1.59154513	2.159377
101	0.69905519	-7.78245540	-5.44036584		101.00000000	0.34000000	-2.64603484	2.180759
