# Supplementary material for: Study on the Electrical Injection Regeneration of Industrialized B-Doped Czochralski Silicon PERC Solar Cells
Source: Hindawi journal article supplement (doi:10.1155/2019/5357370), 2019-06-20
Supplement: f1 [file 5357370.f1.zip › section3.1/IVRawData_1-20-10h.csv]

10:35 03/04/2018
Test Lot:	JK-PERC
Recipe:	Recipe_YJX-LID
Cell Name:	1-20-10h
Test Order:	2
Test Condition:	Light
1	-0.29986119	9.08296870	-2.72362980		1.00000000	34.34000000	311.90914516	0.000000
2	-0.29007304	9.05646710	-2.62703694		2.00000000	17.17000000	155.49954011	0.061720
3	-0.27995515	9.07211110	-2.53978422		3.00000000	11.44666667	103.84543172	0.083248
4	-0.27013054	9.06274510	-2.44812423		4.00000000	8.58500000	77.80366668	0.104628
5	-0.25993526	9.07763480	-2.35959736		5.00000000	6.86800000	62.34519581	0.125995
6	-0.24978687	9.05775740	-2.26250887		6.00000000	5.72333333	51.84056485	0.147362
7	-0.23996000	9.07383160	-2.17735663		7.00000000	4.90571429	44.51362531	0.168838
8	-0.22984213	9.07175350	-2.08507115		8.00000000	4.29250000	38.94050190	0.190271
9	-0.21999443	9.07210730	-1.99581307		9.00000000	3.81555556	34.61512941	0.211639
10	-0.20986614	9.06875800	-1.90322524		10.00000000	3.43400000	31.14211497	0.233022
11	-0.20003258	9.06810380	-1.81391620		11.00000000	3.12181818	28.30897132	0.254514
12	-0.18988939	9.08235070	-1.72464203		12.00000000	2.86166667	25.99066025	0.275894
13	-0.18008189	9.08703900	-1.63641116		13.00000000	2.64153846	24.00376302	0.297257
14	-0.16995582	9.05439090	-1.53884643		14.00000000	2.45285714	22.20912739	0.318636
15	-0.16015799	9.07747650	-1.45383039		15.00000000	2.28933333	20.78136953	0.340105
16	-0.15000066	9.07143020	-1.36072052		16.00000000	2.14625000	19.46955707	0.361495
17	-0.13985674	9.07154850	-1.26871720		17.00000000	2.02000000	18.32452797	0.382840
18	-0.13003063	9.07157990	-1.17958325		18.00000000	1.90777778	17.30655854	0.404203
19	-0.11989414	9.06659030	-1.08703105		19.00000000	1.80736842	16.38666899	0.425682
20	-0.11004794	9.07424740	-0.99860223		20.00000000	1.71700000	15.58048279	0.447061
21	-0.09989879	9.06874470	-0.90595665		21.00000000	1.63523810	14.82955681	0.468462
22	-0.09006747	9.08117290	-0.81791826		22.00000000	1.56090909	14.17488534	0.489848
23	-0.07995034	9.06632330	-0.72485563		23.00000000	1.49304348	13.53641487	0.511330
24	-0.07014432	9.06035900	-0.63553270		24.00000000	1.43083333	12.96386367	0.532709
25	-0.05998402	9.07373330	-0.54427901		25.00000000	1.37360000	12.46368006	0.554096
26	-0.04984977	9.06498810	-0.45188758		26.00000000	1.32076923	11.97275736	0.575493
27	-0.04000505	9.07444760	-0.36302370		27.00000000	1.27185185	11.54135298	0.596962
28	-0.02986633	9.07016660	-0.27089261		28.00000000	1.22642857	11.12391147	0.618337
29	-0.02002757	9.07272150	-0.18170452		29.00000000	1.18413793	10.74335367	0.639708
30	-0.00987396	9.07949920	-0.08965064		30.00000000	1.14466667	10.39300008	0.661059
31	-0.00060607	9.06719110	-0.00549531		31.00000000	1.10774194	10.04410782	0.682652
32	0.00951160	9.06541060	0.08622658		32.00000000	1.07312500	9.72831875	0.704035
33	0.01933669	9.06141850	0.17521787		33.00000000	1.04060606	9.42936701	0.725423
34	0.02947214	9.06812100	0.26725695		34.00000000	1.01000000	9.15880221	0.746902
35	0.03931882	9.06849960	0.35656266		35.00000000	0.98114286	8.89749361	0.768296
36	0.04946617	9.06848430	0.44858322		36.00000000	0.95388889	8.65032641	0.789654
37	0.05927191	9.06260010	0.53715764		37.00000000	0.92810811	8.41107263	0.811029
38	0.06941034	9.07834050	0.63013069		38.00000000	0.90368421	8.20395297	0.832526
39	0.07956291	9.06446270	0.72119503		39.00000000	0.88051282	7.98137562	0.853908
40	0.08936939	9.07048700	0.81062393		40.00000000	0.85850000	7.78701309	0.875253
41	0.09952197	9.06419370	0.90208637		41.00000000	0.83756098	7.59181492	0.896637
42	0.10934928	9.06614970	0.99137694		42.00000000	0.81761905	7.41265668	0.918123
43	0.11947580	9.06471630	1.08301423		43.00000000	0.79860465	7.23912460	0.939510
44	0.12932025	9.06285570	1.17201076		44.00000000	0.78045455	7.07314693	0.960879
45	0.13944378	9.07490630	1.26543924		45.00000000	0.76311111	6.92516183	0.982262
46	0.14930981	9.06571390	1.35360002		46.00000000	0.74652174	6.76775251	1.003740
47	0.15942815	9.06970120	1.44596568		47.00000000	0.73063830	6.62667105	1.025132
48	0.16954350	9.06501480	1.53691434		48.00000000	0.71541667	6.48526267	1.046483
49	0.17936561	9.07084750	1.62699810		49.00000000	0.70081633	6.35699802	1.067881
50	0.18952042	9.06189730	1.71741458		50.00000000	0.68680000	6.22371107	1.089362
51	0.19928448	9.06855110	1.80722149		51.00000000	0.67333333	6.10615774	1.110742
52	0.20945638	9.07043170	1.89985979		52.00000000	0.66038462	5.98997355	1.132094
53	0.21927775	9.06870460	1.98856514		53.00000000	0.64792453	5.87583615	1.153471
54	0.22940725	9.06170080	2.07881986		54.00000000	0.63592593	5.76257047	1.174945
55	0.23924574	9.06790070	2.16945661		55.00000000	0.62436364	5.66166746	1.196334
56	0.24936259	9.06299590	2.25997213		56.00000000	0.61321429	5.55755856	1.217688
57	0.25953451	9.05810930	2.35089196		57.00000000	0.60245614	5.45711357	1.239058
58	0.26932982	9.07429220	2.44397748		58.00000000	0.59206897	5.37260680	1.260529
59	0.27952704	9.06238650	2.53318207		59.00000000	0.58203390	5.27461614	1.281908
60	0.28933650	9.06838610	2.62381509		60.00000000	0.57233333	5.19013964	1.303289
61	0.29949206	9.06221290	2.71406081		61.00000000	0.56295082	5.10158018	1.324648
62	0.30929035	9.05800440	2.80155335		62.00000000	0.55387097	5.01696566	1.346124
63	0.31944442	9.08030800	2.90065372		63.00000000	0.54507937	4.94948852	1.367501
64	0.32930598	9.05228520	2.98097165		64.00000000	0.53656250	4.85711678	1.388891
65	0.33943546	9.07326410	3.07978757		65.00000000	0.52830769	4.79347522	1.410345
66	0.34926128	9.06356330	3.16555172		66.00000000	0.52030303	4.71579945	1.431803
67	0.35940641	9.06716630	3.25879769		67.00000000	0.51253731	4.64726106	1.453179
68	0.36953816	9.06483170	3.34980123		68.00000000	0.50500000	4.57774001	1.474600
69	0.37938929	9.07472420	3.44285317		69.00000000	0.49768116	4.51631926	1.495949
70	0.38954708	9.05373670	3.52685669		70.00000000	0.49057143	4.44150455	1.517436
71	0.39937887	9.06508830	3.62040472		71.00000000	0.48366197	4.38443848	1.538813
72	0.40948007	9.07112600	3.71444531		72.00000000	0.47694444	4.32642315	1.560215
73	0.41933122	9.06207280	3.80001004		73.00000000	0.47041096	4.26289836	1.581592
74	0.42947784	9.06171420	3.89180544		74.00000000	0.46405405	4.20512521	1.603068
75	0.43930814	9.06579110	3.98267583		75.00000000	0.45786667	4.15092355	1.624464
76	0.44947484	9.04975990	4.06763938		76.00000000	0.45184211	4.08906257	1.645839
77	0.45956936	9.06511500	4.16604910		77.00000000	0.44597403	4.04280583	1.667170
78	0.46943685	9.06078430	4.25346604		78.00000000	0.44025641	3.98906837	1.688653
79	0.47959316	9.03608230	4.33364326		79.00000000	0.43468354	3.92783628	1.710026
80	0.48936093	9.03572180	4.42172922		80.00000000	0.42925000	3.87858358	1.731407
81	0.49952763	9.02528290	4.50837818		81.00000000	0.42395062	3.82627426	1.752894
82	0.50932294	8.99959950	4.58370248		82.00000000	0.41878049	3.76885667	1.774266
83	0.51945990	9.00640010	4.67846370		83.00000000	0.41373494	3.72626240	1.795623
84	0.52925968	8.95547010	4.73976924		84.00000000	0.40880952	3.66108147	1.816995
85	0.53942788	8.91897110	4.81114167		85.00000000	0.40400000	3.60326432	1.838477
86	0.54956257	8.84522910	4.86100684		86.00000000	0.39930233	3.53192055	1.859871
87	0.55933332	8.74490360	4.89131596		87.00000000	0.39471264	3.45172402	1.881230
88	0.56949264	8.62867640	4.91396770		88.00000000	0.39022727	3.36714486	1.902604
89	0.57930583	8.43703270	4.88762223		89.00000000	0.38584270	3.25536745	1.924088
90	0.58941817	8.18889520	4.82668362		90.00000000	0.38155556	3.12451846	1.945472
91	0.59923506	7.84185700	4.69911565		91.00000000	0.37736264	2.95922384	1.966820
92	0.60934669	7.35773990	4.48341445		92.00000000	0.37326087	2.74635639	1.988294
93	0.61914355	6.74528220	4.17629797		93.00000000	0.36924731	2.49067732	2.009806
94	0.62924844	5.92448330	3.72797187		94.00000000	0.36531915	2.16432720	2.031201
95	0.63936305	4.86900000	3.11305869		95.00000000	0.36147368	1.76001537	2.052544
96	0.64917105	3.56990790	2.31748086		96.00000000	0.35770833	1.27698581	2.073914
97	0.65927225	1.93605070	1.27638450		97.00000000	0.35402062	0.68540187	2.095393
98	0.66900283	0.01643151	0.01099272		98.00000000	0.35040816	0.00575773	2.116772
99	0.67909139	-2.31214900	-1.57016048		99.00000000	0.34686869	-0.80201209	2.138119
100	0.68881899	-4.96764800	-3.42181028		100.00000000	0.34340000	-1.70589032	2.159492
101	0.69902366	-8.14181330	-5.69132013		101.00000000	0.34000000	-2.76821652	2.180968
10:36 03/04/2018
Test Lot:	JK-PERC
Recipe:	Recipe_YJX-LID
Cell Name:	1-20-10h
Test Order:	3
Test Condition:	Light
1	-0.29986548	9.07493020	-2.72125830		1.00000000	34.34000000	311.63310307	0.000000
2	-0.29005593	9.06650260	-2.62979284		2.00000000	17.17000000	155.67184964	0.061784
3	-0.27991590	9.06848810	-2.53841401		3.00000000	11.44666667	103.80396045	0.083252
4	-0.27010560	9.06890390	-2.44956173		4.00000000	8.58500000	77.85653998	0.104622
5	-0.25994176	9.07052610	-2.35780852		5.00000000	6.86800000	62.29637325	0.126113
6	-0.24975930	9.07232480	-2.26589749		6.00000000	5.72333333	51.92393894	0.147493
7	-0.23990582	9.06183910	-2.17398794		7.00000000	4.90571429	44.45479353	0.168880
8	-0.22980674	9.06798080	-2.08388311		8.00000000	4.29250000	38.92430758	0.190294
9	-0.21997930	9.07010360	-1.99523504		9.00000000	3.81555556	34.60748418	0.211771
10	-0.20983481	9.07296560	-1.90382401		10.00000000	3.43400000	31.15656387	0.233137
11	-0.20001706	9.06481840	-1.81311833		11.00000000	3.12181818	28.29871490	0.254537
12	-0.18985173	9.07483290	-1.72287273		12.00000000	2.86166667	25.96914682	0.275895
13	-0.18009502	9.05562970	-1.63087381		13.00000000	2.64153846	23.92079415	0.297381
14	-0.16993192	9.09029200	-1.54473077		14.00000000	2.45285714	22.29718766	0.318763
15	-0.16011193	9.07328320	-1.45274088		15.00000000	2.28933333	20.77176967	0.340148
16	-0.14996298	9.06308080	-1.35912660		16.00000000	2.14625000	19.45163717	0.361514
17	-0.13979913	9.07565400	-1.26876853		17.00000000	2.02000000	18.33282108	0.382987
18	-0.13000147	9.06959820	-1.17906110		18.00000000	1.90777778	17.30277790	0.404370
19	-0.11987634	9.07249550	-1.08757756		19.00000000	1.80736842	16.39734187	0.425758
20	-0.11005114	9.07521720	-0.99873800		20.00000000	1.71700000	15.58214793	0.447104
21	-0.09990665	9.07288070	-0.90644114		21.00000000	1.63523810	14.83632015	0.468577
22	-0.09006210	9.07586770	-0.81739174		22.00000000	1.56090909	14.16660440	0.489942
23	-0.07992208	9.06623550	-0.72459240		23.00000000	1.49304348	13.53628379	0.511332
24	-0.07010433	9.07012180	-0.63585482		24.00000000	1.43083333	12.97783261	0.532804
25	-0.05995910	9.06852630	-0.54374063		25.00000000	1.37360000	12.45652773	0.554178
26	-0.04980046	9.05882070	-0.45113347		26.00000000	1.32076923	11.96461165	0.575544
27	-0.03999760	9.08010390	-0.36318233		27.00000000	1.27185185	11.54854696	0.596923
28	-0.02984492	9.07146740	-0.27073723		28.00000000	1.22642857	11.12550680	0.618403
29	-0.02001601	9.07889180	-0.18172314		29.00000000	1.18413793	10.75066015	0.639782
30	-0.00988566	9.07006840	-0.08966357		30.00000000	1.14466667	10.38220496	0.661126
31	-0.00064621	9.07255840	-0.00586275		31.00000000	1.10774194	10.05005340	0.682614
32	0.00951073	9.07299230	0.08629076		32.00000000	1.07312500	9.73645486	0.704098
33	0.01930513	9.06876660	0.17507371		33.00000000	1.04060606	9.43701349	0.725491
34	0.02944412	9.06938740	0.26704012		34.00000000	1.01000000	9.16008127	0.746839
35	0.03926978	9.07472320	0.35636237		35.00000000	0.98114286	8.90359985	0.768212
36	0.04946310	9.06538580	0.44840209		36.00000000	0.95388889	8.64737079	0.789683
37	0.05926345	9.06894870	0.53745722		37.00000000	0.92810811	8.41696482	0.811076
38	0.06940468	9.07055760	0.62953912		38.00000000	0.90368421	8.19691968	0.832426
39	0.07956749	9.06977650	0.72165931		39.00000000	0.88051282	7.98605449	0.853799
40	0.08938050	9.06315610	0.81006938		40.00000000	0.85850000	7.78071951	0.875285
41	0.09952246	9.06876370	0.90254565		41.00000000	0.83756098	7.59564257	0.896647
42	0.10933174	9.05616190	0.99012594		42.00000000	0.81761905	7.40449047	0.917995
43	0.11949679	9.06929400	1.08375152		43.00000000	0.79860465	7.24278037	0.939376
44	0.12932989	9.07633020	1.17384079		44.00000000	0.78045455	7.08366316	0.960855
45	0.13946813	9.03904910	1.26065927		45.00000000	0.76311111	6.89779880	0.982233
46	0.14928858	9.07874010	1.35535222		46.00000000	0.74652174	6.77747685	1.003596
47	0.15947223	9.05484490	1.44399631		47.00000000	0.73063830	6.61581647	1.024962
48	0.16960602	9.07796760	1.53967795		48.00000000	0.71541667	6.49452932	1.046433
49	0.17938627	9.06271360	1.62572639		49.00000000	0.70081633	6.35129765	1.067828
50	0.18952750	9.06577300	1.71821329		50.00000000	0.68680000	6.22637290	1.089212
51	0.19933455	9.06387520	1.80674348		51.00000000	0.67333333	6.10300930	1.110569
52	0.20942368	9.06470490	1.89836386		52.00000000	0.66038462	5.98619166	1.132046
53	0.21927166	9.05848310	1.98626863		53.00000000	0.64792453	5.86921339	1.153422
54	0.22942255	9.07053090	2.08098433		54.00000000	0.63592593	5.76818576	1.174811
55	0.23927054	9.06496720	2.16897960		55.00000000	0.62436364	5.65983588	1.196280
56	0.24938126	9.06517220	2.26068407		56.00000000	0.61321429	5.55889310	1.217662
57	0.25954852	9.05420400	2.35000525		57.00000000	0.60245614	5.45476080	1.239021
58	0.26936600	9.06237510	2.44109573		58.00000000	0.59206897	5.36555105	1.260405
59	0.27952731	9.06774710	2.53468295		59.00000000	0.58203390	5.27773619	1.281879
60	0.28936264	9.05308440	2.61962440		60.00000000	0.57233333	5.18138197	1.303263
61	0.29947114	9.07443240	2.71753062		61.00000000	0.56295082	5.10845916	1.324616
62	0.30931538	9.05552960	2.80101458		62.00000000	0.55387097	5.01559494	1.345988
63	0.31945068	9.06319810	2.89524480		63.00000000	0.54507937	4.94016227	1.367484
64	0.32927334	9.06106850	2.98356829		64.00000000	0.53656250	4.86182957	1.388851
65	0.33943391	9.06544400	3.07711910		65.00000000	0.52830769	4.78934380	1.410212
66	0.34927297	9.07145880	3.16841536		66.00000000	0.52030303	4.71990750	1.431577
67	0.35936731	9.05245020	3.25315468		67.00000000	0.51253731	4.63971851	1.453048
68	0.36957923	9.06659890	3.35082664		68.00000000	0.50500000	4.57863244	1.474439
69	0.37941530	9.06425290	3.43911623		69.00000000	0.49768116	4.51110789	1.495784
70	0.38956398	9.06321810	3.53070331		70.00000000	0.49057143	4.44615585	1.517160
71	0.39937103	9.05133530	3.61484110		71.00000000	0.48366197	4.37778668	1.538643
72	0.40950111	9.06131840	3.71061994		72.00000000	0.47694444	4.32174547	1.560019
73	0.41935205	9.05695820	3.79805399		73.00000000	0.47041096	4.26049239	1.581376
74	0.42947766	9.03747560	3.88139387		74.00000000	0.46405405	4.19387719	1.602754
75	0.43927652	9.07114030	3.98473894		75.00000000	0.45786667	4.15337277	1.624229
76	0.44943339	9.06027220	4.07198885		76.00000000	0.45184211	4.09381247	1.645618
77	0.45961106	9.05395030	4.16129569		77.00000000	0.44597403	4.03782667	1.666996
78	0.46945235	9.05059620	4.24882365		78.00000000	0.44025641	3.98458299	1.688366
79	0.47956827	9.04033090	4.33545585		79.00000000	0.43468354	3.92968308	1.709843
80	0.48937234	9.04522610	4.42648346		80.00000000	0.42925000	3.88266330	1.731219
81	0.49955973	9.02713870	4.50959497		81.00000000	0.42395062	3.82706102	1.752596
82	0.50934297	9.00839900	4.58836470		82.00000000	0.41878049	3.77254173	1.773947
83	0.51953626	8.98907470	4.67015025		83.00000000	0.41373494	3.71909428	1.795417
84	0.52927041	8.95460800	4.73940905		84.00000000	0.40880952	3.66072903	1.816800
85	0.53939670	8.91113850	4.80663870		85.00000000	0.40400000	3.60009995	1.838194
86	0.54955882	8.84326550	4.85989455		86.00000000	0.39930233	3.53113648	1.859674
87	0.55934501	8.75282100	4.89584675		87.00000000	0.39471264	3.45484912	1.881044
88	0.56950337	8.62222190	4.91038443		88.00000000	0.39022727	3.36462614	1.902405
89	0.57930595	8.44477940	4.89211095		89.00000000	0.38584270	3.25835646	1.923782
90	0.58946204	8.20970730	4.83931081		90.00000000	0.38155556	3.13245943	1.945262
91	0.59922147	7.85181670	4.70497715		91.00000000	0.37736264	2.96298226	1.966651
92	0.60930759	7.38309860	4.49857801		92.00000000	0.37326087	2.75582180	1.988115
93	0.61913627	6.77532580	4.19484994		93.00000000	0.36924731	2.50177084	2.009579
94	0.62924027	5.95623210	3.74790109		94.00000000	0.36531915	2.17592564	2.031081
95	0.63939041	4.89314750	3.12863159		95.00000000	0.36147368	1.76874405	2.052451
96	0.64916176	3.60414530	2.33967331		96.00000000	0.35770833	1.28923281	2.073865
97	0.65923005	1.95048050	1.28581536		97.00000000	0.35402062	0.69051031	2.095256
98	0.66904974	0.01877450	0.01256108		98.00000000	0.35040816	0.00657874	2.116742
99	0.67908603	-2.35230640	-1.59741841		99.00000000	0.34686869	-0.81594143	2.138187
100	0.68884021	-5.04328780	-3.47401943		100.00000000	0.34340000	-1.73186503	2.159554
101	0.69904172	-8.30075450	-5.80257370		101.00000000	0.34000000	-2.82225653	2.180929
10:36 03/04/2018
Test Lot:	JK-PERC
Recipe:	Recipe_YJX-LID
Cell Name:	1-20-10h
Test Order:	4
Test Condition:	Light
1	-0.29987666	9.05469990	-2.71529316		1.00000000	34.34000000	310.93839457	0.000000
2	-0.29001051	9.06178280	-2.62801225		2.00000000	17.17000000	155.59081068	0.021588
3	-0.27989134	9.06559750	-2.53738223		3.00000000	11.44666667	103.77087272	0.042984
4	-0.27009666	9.07034210	-2.44986911		4.00000000	8.58500000	77.86888693	0.064363
5	-0.25995961	9.06738190	-2.35715306		5.00000000	6.86800000	62.27477889	0.085765
6	-0.24981065	9.06226350	-2.26384994		6.00000000	5.72333333	51.86635477	0.107261
7	-0.23996462	9.07274910	-2.17713879		7.00000000	4.90571429	44.50831487	0.128643
8	-0.22981194	9.07223990	-2.08490905		8.00000000	4.29250000	38.94258977	0.150023
9	-0.21998824	9.06719490	-1.99467625		9.00000000	3.81555556	34.59638587	0.171520
10	-0.20981844	9.07497310	-1.90409670		10.00000000	3.43400000	31.16345763	0.192895
11	-0.20000292	9.05555630	-1.81113770		11.00000000	3.12181818	28.26980030	0.214243
12	-0.18989266	9.06966780	-1.72226334		12.00000000	2.86166667	25.95436602	0.235617
13	-0.18009724	9.07279590	-1.63398550		13.00000000	2.64153846	23.96613932	0.257100
14	-0.16995499	9.06474970	-1.54059944		14.00000000	2.45285714	22.23453605	0.278489
15	-0.16011119	9.07036210	-1.45226647		15.00000000	2.28933333	20.76508230	0.299837
16	-0.14996149	9.06899740	-1.36000036		16.00000000	2.14625000	19.46433567	0.321205
17	-0.13982071	9.06134510	-1.26696371		17.00000000	2.02000000	18.30391710	0.342693
18	-0.13000967	9.07072450	-1.17928190		18.00000000	1.90777778	17.30492663	0.364081
19	-0.11985624	9.06932450	-1.08701513		19.00000000	1.80736842	16.39161070	0.385427
20	-0.11001914	9.07040210	-0.99791784		20.00000000	1.71700000	15.57388041	0.406805
21	-0.09987093	9.06451800	-0.90528182		21.00000000	1.63523810	14.82264515	0.428283
22	-0.09005094	9.07016370	-0.81677679		22.00000000	1.56090909	14.15770098	0.449653
23	-0.07992134	9.05939290	-0.72403877		23.00000000	1.49304348	13.52606749	0.471019
24	-0.07011252	9.07030200	-0.63594172		24.00000000	1.43083333	12.97809045	0.492392
25	-0.05996877	9.05983830	-0.54330736		25.00000000	1.37360000	12.44459389	0.513864
26	-0.04983768	9.06849480	-0.45195273		26.00000000	1.32076923	11.97738890	0.535232
27	-0.04000728	9.07382010	-0.36301882		27.00000000	1.27185185	11.54055490	0.556569
28	-0.02985013	9.06021690	-0.27044866		28.00000000	1.22642857	11.11170887	0.577948
29	-0.02004280	9.06276040	-0.18164309		29.00000000	1.18413793	10.73155835	0.599427
30	-0.00988417	9.07002160	-0.08964961		30.00000000	1.14466667	10.38215139	0.620798
31	-0.00067970	9.06390380	-0.00616073		31.00000000	1.10774194	10.04046634	0.642292
32	0.00948840	9.06374840	0.08600047		32.00000000	1.07312500	9.72653500	0.663658
33	0.01933118	9.06291580	0.17519684		33.00000000	1.04060606	9.43092511	0.685131
34	0.02943668	9.07642840	0.26717988		34.00000000	1.01000000	9.16719268	0.706521
35	0.03930476	9.06356140	0.35624110		35.00000000	0.98114286	8.89264853	0.727901
36	0.04944598	9.07007880	0.44847896		36.00000000	0.95388889	8.65184739	0.749248
37	0.05924261	9.05846980	0.53664743		37.00000000	0.92810811	8.40723927	0.770722
38	0.06938756	9.06958770	0.62931659		38.00000000	0.90368421	8.19604320	0.792089
39	0.07954293	9.06524370	0.72107602		39.00000000	0.88051282	7.98206330	0.813472
40	0.08938198	9.06360340	0.81012280		40.00000000	0.85850000	7.78110352	0.834951
41	0.09953660	9.06020360	0.90182184		41.00000000	0.83756098	7.58847297	0.856338
42	0.10935631	9.05762200	0.99050812		42.00000000	0.81761905	7.40568427	0.877703
43	0.11950646	9.07168390	1.08412483		43.00000000	0.79860465	7.24468896	0.899130
44	0.12935370	9.05609700	1.17143965		44.00000000	0.78045455	7.06787207	0.920622
45	0.13946739	9.06573300	1.26437412		45.00000000	0.76311111	6.91816158	0.942005
46	0.14927965	9.06642910	1.35343336		46.00000000	0.74652174	6.76828642	0.963350
47	0.15944618	9.05687140	1.44408355		47.00000000	0.73063830	6.61729710	0.984725
48	0.16956508	9.06634520	1.53733555		48.00000000	0.71541667	6.48621446	1.006206
49	0.17939743	9.05323120	1.62412641		49.00000000	0.70081633	6.34465223	1.027580
50	0.18954089	9.07729340	1.72051827		50.00000000	0.68680000	6.23428511	1.048925
51	0.19932041	9.05448150	1.80474296		51.00000000	0.67333333	6.09668421	1.070303
52	0.20948842	9.05970670	1.89790364		52.00000000	0.66038462	5.98289092	1.091792
53	0.21929324	9.07481480	1.99004554		53.00000000	0.64792453	5.87979510	1.113186
54	0.22945754	9.05958840	2.07879087		54.00000000	0.63592593	5.76122714	1.134529
55	0.23927501	9.06462670	2.16893864		55.00000000	0.62436364	5.65962329	1.155885
56	0.24943855	9.06455330	2.26104903		56.00000000	0.61321429	5.55851358	1.177352
57	0.25955299	9.06181910	2.35202224		57.00000000	0.60245614	5.45934856	1.198736
58	0.26937792	9.06317420	2.44141901		58.00000000	0.59206897	5.36602417	1.220083
59	0.27949828	9.05773260	2.53162068		59.00000000	0.58203390	5.27190741	1.241453
60	0.28934777	9.04651550	2.61758909		60.00000000	0.57233333	5.17762237	1.262932
61	0.29950535	9.08506680	2.72102611		61.00000000	0.56295082	5.11444580	1.284309
62	0.30932060	9.05272390	2.80019399		62.00000000	0.55387097	5.01404095	1.305683
63	0.31945810	9.06599140	2.89620439		63.00000000	0.54507937	4.94168484	1.327051
64	0.32924879	9.05504890	2.98136389		64.00000000	0.53656250	4.85859968	1.348517
65	0.33942276	9.06425290	3.07661374		65.00000000	0.52830769	4.78871453	1.369905
66	0.34924468	9.05963800	3.16403037		66.00000000	0.52030303	4.71375710	1.391286
67	0.35939261	9.06723310	3.25869657		67.00000000	0.51253731	4.64729529	1.412635
68	0.36955020	9.05232720	3.34528933		68.00000000	0.50500000	4.57142524	1.434109
69	0.37938482	9.06252860	3.43818578		69.00000000	0.49768116	4.51024974	1.455475
70	0.38952455	9.06641200	3.53159005		70.00000000	0.49057143	4.44772269	1.476865
71	0.39935914	9.05979540	3.61811210		71.00000000	0.48366197	4.38187851	1.498339
72	0.40949216	9.06350800	3.71143547		72.00000000	0.47694444	4.32278979	1.519711
73	0.41932824	9.06337450	3.80052888		73.00000000	0.47041096	4.26351069	1.541069
74	0.42951041	9.06419090	3.89316435		74.00000000	0.46405405	4.20627453	1.562437
75	0.43930256	9.05642700	3.97851157		75.00000000	0.45786667	4.14663604	1.583913
76	0.44946316	9.05686760	4.07072833		76.00000000	0.45184211	4.09227412	1.605308
77	0.45960140	9.05988220	4.16393454		77.00000000	0.44597403	4.04047214	1.626662
78	0.46945533	9.05474000	4.25079595		78.00000000	0.44025641	3.98640733	1.648032
79	0.47957572	9.04292580	4.33676765		79.00000000	0.43468354	3.93081104	1.669518
80	0.48938650	9.03331850	4.42078412		80.00000000	0.42925000	3.87755197	1.690885
81	0.49955601	9.02366260	4.50782488		81.00000000	0.42395062	3.82558733	1.712224
82	0.50935340	9.01837350	4.59353920		82.00000000	0.41878049	3.77671885	1.733613
83	0.51950574	8.97886470	4.66457175		83.00000000	0.41373494	3.71487005	1.755083
84	0.52926219	8.96683410	4.74580625		84.00000000	0.40880952	3.66572718	1.776464
85	0.53943318	8.91094020	4.80685681		85.00000000	0.40400000	3.60001984	1.797816
86	0.54956400	8.84346100	4.86004780		86.00000000	0.39930233	3.53121454	1.819183
87	0.55937999	8.76793290	4.90460622		87.00000000	0.39471264	3.46081397	1.840675
88	0.56951970	8.62410260	4.91159633		88.00000000	0.39022727	3.36536004	1.862061
89	0.57931262	8.46522140	4.90400959		89.00000000	0.38584270	3.26624385	1.883406
90	0.58945537	8.20540810	4.83672187		90.00000000	0.38155556	3.13081905	1.904786
91	0.59925348	7.88567300	4.72551699		91.00000000	0.37736264	2.97575836	1.926270
92	0.60932475	7.41651680	4.51906725		92.00000000	0.37326087	2.76829551	1.947642
93	0.61916006	6.81513740	4.21966088		93.00000000	0.36924731	2.51647116	1.969022
94	0.62924546	5.99138160	3.77004967		94.00000000	0.36531915	2.18876643	1.990490
95	0.63936067	4.94319960	3.16048741		95.00000000	0.36147368	1.78683657	2.011983
96	0.64916176	3.64177370	2.36410022		96.00000000	0.35770833	1.30269280	2.033375
97	0.65921438	1.98251650	1.30690339		97.00000000	0.35402062	0.70185172	2.054758
98	0.66900283	0.01474218	0.00986256		98.00000000	0.35040816	0.00516578	2.076164
99	0.67909795	-2.38717200	-1.62112361		99.00000000	0.34686869	-0.82803522	2.097661
100	0.68881792	-5.14158250	-3.54161416		100.00000000	0.34340000	-1.76561943	2.119027
101	0.69907969	-8.48532770	-5.93192026		101.00000000	0.34000000	-2.88501142	2.140421
