# Supplementary material for: Study on the Electrical Injection Regeneration of Industrialized B-Doped Czochralski Silicon PERC Solar Cells
Source: Hindawi journal article supplement (doi:10.1155/2019/5357370), 2019-06-20
Supplement: f1 [file 5357370.f1.zip › section3.1/IVRawData_1-20-11H.csv]

11:32 03/04/2018
Test Lot:	JK-PERC
Recipe:	Recipe_YJX-LID
Cell Name:	1-20-11H
Test Order:	2
Test Condition:	Light
1	-0.29988950	9.05865190	-2.71659459		1.00000000	34.34000000	311.07410625	0.000000
2	-0.29002097	9.04809190	-2.62413639		2.00000000	17.17000000	155.35573792	0.061732
3	-0.27989566	9.06440260	-2.53708695		3.00000000	11.44666667	103.75719509	0.083252
4	-0.27008888	9.05034260	-2.44439690		4.00000000	8.58500000	77.69719122	0.104635
5	-0.25994423	9.05156140	-2.35290116		5.00000000	6.86800000	62.16612370	0.126013
6	-0.24971917	9.05524250	-2.26126764		6.00000000	5.72333333	51.82617124	0.147391
7	-0.23990794	9.05496030	-2.17235687		7.00000000	4.90571429	44.42104810	0.168908
8	-0.22979230	9.04659940	-2.07883888		8.00000000	4.29250000	38.83252792	0.190309
9	-0.22004507	9.05011940	-1.99143416		9.00000000	3.81555556	34.53123336	0.211651
10	-0.20985352	9.06170080	-1.90162981		10.00000000	3.43400000	31.11788055	0.233021
11	-0.19997157	9.04487900	-1.80871865		11.00000000	3.12181818	28.23646771	0.254507
12	-0.18986635	9.04847910	-1.71800170		12.00000000	2.86166667	25.89373102	0.275880
13	-0.18019727	9.05353550	-1.63142238		13.00000000	2.64153846	23.91526224	0.297222
14	-0.16999455	9.05212500	-1.53881192		14.00000000	2.45285714	22.20356946	0.318597
15	-0.16017811	9.04915140	-1.44947597		15.00000000	2.28933333	20.71652394	0.340076
16	-0.14998133	9.06420230	-1.35946112		16.00000000	2.14625000	19.45404419	0.361471
17	-0.13988355	9.05294800	-1.26635850		17.00000000	2.02000000	18.28695496	0.382828
18	-0.13007829	9.04439540	-1.17647949		18.00000000	1.90777778	17.25469656	0.404196
19	-0.11980410	9.05424590	-1.08473578		19.00000000	1.80736842	16.36435812	0.425681
20	-0.11007325	9.04709530	-0.99584318		20.00000000	1.71700000	15.53386263	0.447047
21	-0.09982661	9.06302260	-0.90473084		21.00000000	1.63523810	14.82019981	0.468389
22	-0.09008832	9.04591560	-0.81493137		22.00000000	1.56090909	14.11985190	0.489757
23	-0.07990570	9.05111220	-0.72323542		23.00000000	1.49304348	13.51370404	0.511221
24	-0.07013764	9.05151460	-0.63485183		24.00000000	1.43083333	12.95120881	0.532600
25	-0.05996542	9.05618570	-0.54305799		25.00000000	1.37360000	12.43957668	0.553987
26	-0.04983638	9.04683300	-0.45086140		26.00000000	1.32076923	11.94877866	0.575335
27	-0.04001027	9.05133910	-0.36214649		27.00000000	1.27185185	11.51196240	0.596807
28	-0.02979563	9.04499050	-0.26950119		28.00000000	1.22642857	11.09303478	0.618196
29	-0.02001045	9.04577540	-0.18101003		29.00000000	1.18413793	10.71144577	0.639566
30	-0.00990150	9.05496880	-0.08965780		30.00000000	1.14466667	10.36492095	0.660974
31	-0.00060383	9.04958150	-0.00546444		31.00000000	1.10774194	10.02460093	0.682569
32	0.00941708	9.04557800	0.08518294		32.00000000	1.07312500	9.70703589	0.703947
33	0.01930916	9.05442140	0.17483324		33.00000000	1.04060606	9.42208578	0.725361
34	0.02947512	9.05222230	0.26681537		34.00000000	1.01000000	9.14274452	0.746723
35	0.03930766	9.05083180	0.35576700		35.00000000	0.98114286	8.88015897	0.768210
36	0.04936050	9.04809670	0.44661853		36.00000000	0.95388889	8.63087891	0.789603
37	0.05927564	9.04996590	0.53644254		37.00000000	0.92810811	8.39934673	0.810956
38	0.06942672	9.05767250	0.62884452		38.00000000	0.90368421	8.18527562	0.832311
39	0.07948626	9.03517440	0.71817220		39.00000000	0.88051282	7.95558689	0.853780
40	0.08942448	9.06410410	0.81055282		40.00000000	0.85850000	7.78153337	0.875165
41	0.09961873	9.04357240	0.90090922		41.00000000	0.83756098	7.57454332	0.896540
42	0.10940065	9.05661960	0.99080007		42.00000000	0.81761905	7.40486469	0.917956
43	0.11949889	9.04629900	1.08102269		43.00000000	0.79860465	7.22441646	0.939437
44	0.12933366	9.04543300	1.16987896		44.00000000	0.78045455	7.05954930	0.960826
45	0.13944305	9.06632230	1.26423563		45.00000000	0.76311111	6.91861128	0.982207
46	0.14931653	9.04884430	1.35114203		46.00000000	0.74652174	6.75515898	1.003693
47	0.15944603	9.05809120	1.44427668		47.00000000	0.73063830	6.61818834	1.025079
48	0.16951747	9.04248620	1.53285938		48.00000000	0.71541667	6.46914534	1.046428
49	0.17933586	9.06302640	1.62532563		49.00000000	0.70081633	6.35151687	1.067801
50	0.18961719	9.04106430	1.71434121		50.00000000	0.68680000	6.20940296	1.089283
51	0.19931576	9.05117890	1.80404260		51.00000000	0.67333333	6.09446046	1.110653
52	0.20947875	9.06493380	1.89891100		52.00000000	0.66038462	5.98634282	1.132002
53	0.21933807	9.05268570	1.98559861		53.00000000	0.64792453	5.86545711	1.153385
54	0.22949734	9.05077650	2.07712913		54.00000000	0.63592593	5.75562343	1.174880
55	0.23925173	9.04503440	2.16404013		55.00000000	0.62436364	5.64739057	1.196265
56	0.24938346	9.05281640	2.25762268		56.00000000	0.61321429	5.55131634	1.217621
57	0.25950626	9.05570790	2.35001289		57.00000000	0.60245614	5.45566683	1.238996
58	0.26942214	9.05022620	2.43833131		58.00000000	0.59206897	5.35835806	1.260480
59	0.27957472	9.05591010	2.53180353		59.00000000	0.58203390	5.27084666	1.281857
60	0.28940949	9.04515460	2.61775358		60.00000000	0.57233333	5.17684348	1.303193
61	0.29948837	9.04745580	2.70960779		61.00000000	0.56295082	5.09327266	1.324569
62	0.30936408	9.05093860	2.80003529		62.00000000	0.55387097	5.01305212	1.346049
63	0.31947273	9.05530740	2.89292378		63.00000000	0.54507937	4.93586121	1.367436
64	0.32929710	9.05231570	2.98090131		64.00000000	0.53656250	4.85713314	1.388796
65	0.33938786	9.04718020	3.07050313		65.00000000	0.52830769	4.77969489	1.410169
66	0.34924349	9.05145450	3.16116156		66.00000000	0.52030303	4.70949921	1.431659
67	0.35937968	9.04862210	3.25189091		67.00000000	0.51253731	4.63775646	1.453045
68	0.36964539	9.04373930	3.34297654		68.00000000	0.50500000	4.56708835	1.474410
69	0.37942210	9.04435540	3.43162832		69.00000000	0.49768116	4.50120528	1.495777
70	0.38947344	9.04488750	3.52274345		70.00000000	0.49057143	4.43716338	1.517258
71	0.39935657	9.05384920	3.61571416		71.00000000	0.48366197	4.37900256	1.538632
72	0.40950170	9.03932380	3.70161846		72.00000000	0.47694444	4.31125527	1.560012
73	0.41939825	9.05721190	3.79857882		73.00000000	0.47041096	4.26061173	1.581365
74	0.42946002	9.03996560	3.88230381		74.00000000	0.46405405	4.19503269	1.602839
75	0.43930149	9.04634760	3.97407398		75.00000000	0.45786667	4.14202102	1.624227
76	0.44942057	9.04135420	4.06337056		76.00000000	0.45184211	4.08526452	1.645609
77	0.45956048	9.03521820	4.15222921		77.00000000	0.44597403	4.02947264	1.667081
78	0.46939600	9.03077700	4.23901060		78.00000000	0.44025641	3.97585746	1.688467
79	0.47960663	9.03595730	4.33370503		79.00000000	0.43468354	3.92778195	1.709814
80	0.48934910	9.02051540	4.41418109		80.00000000	0.42925000	3.87205624	1.731182
81	0.49956864	9.01989170	4.50605503		81.00000000	0.42395062	3.82398865	1.752664
82	0.50931710	8.98931980	4.57841429		82.00000000	0.41878049	3.76455173	1.774034
83	0.51952326	8.97069070	4.66048248		83.00000000	0.41373494	3.71148818	1.795380
84	0.52929252	8.93680480	4.73018393		84.00000000	0.40880952	3.65345091	1.816757
85	0.53944582	8.89206980	4.79678988		85.00000000	0.40400000	3.59239620	1.838226
86	0.54961401	8.83010860	4.85315140		86.00000000	0.39930233	3.52588290	1.859598
87	0.55936694	8.72337440	4.87956724		87.00000000	0.39471264	3.44322617	1.880953
88	0.56945920	8.57944300	4.88564275		88.00000000	0.39022727	3.34793264	1.902335
89	0.57932526	8.40851780	4.87126676		89.00000000	0.38584270	3.24436518	1.923815
90	0.58937436	8.13537790	4.79478314		90.00000000	0.38155556	3.10409863	1.945191
91	0.59929693	7.78896000	4.66789982		91.00000000	0.37736264	2.93926249	1.966542
92	0.60938698	7.31688360	4.45881360		92.00000000	0.37326087	2.73110634	1.988013
93	0.61918676	6.69209620	4.14365736		93.00000000	0.36924731	2.47103853	2.009531
94	0.62930286	5.87219810	3.69539106		94.00000000	0.36531915	2.14522641	2.030906
95	0.63940853	4.81257440	3.07720112		95.00000000	0.36147368	1.73961900	2.052267
96	0.64922917	3.52985950	2.29168775		96.00000000	0.35770833	1.26266016	2.073647
97	0.65938991	1.89212820	1.24765024		97.00000000	0.35402062	0.66985240	2.095137
98	0.66900814	0.00340631	0.00227885		98.00000000	0.35040816	0.00119360	2.116538
99	0.67908108	-2.30534890	-1.56551882		99.00000000	0.34686869	-0.79965335	2.137892
100	0.68886667	-4.92529060	-3.39286853		100.00000000	0.34340000	-1.69134479	2.159253
101	0.69903785	-8.05373950	-5.62986874		101.00000000	0.34000000	-2.73827143	2.180783
11:33 03/04/2018
Test Lot:	JK-PERC
Recipe:	Recipe_YJX-LID
Cell Name:	1-20-11H
Test Order:	3
Test Condition:	Light
1	-0.29983738	9.04393960	-2.71171115		1.00000000	34.34000000	310.56888586	0.000000
2	-0.29006779	9.04778960	-2.62447233		2.00000000	17.17000000	155.35054743	0.061804
3	-0.27994540	9.05226040	-2.53413866		3.00000000	11.44666667	103.61820738	0.083265
4	-0.27007532	9.04452040	-2.44270174		4.00000000	8.58500000	77.64720763	0.104671
5	-0.25993729	9.06167790	-2.35546800		5.00000000	6.86800000	62.23560382	0.126153
6	-0.24979109	9.03995420	-2.25810001		6.00000000	5.72333333	51.73867120	0.147538
7	-0.24003117	9.03773780	-2.16933878		7.00000000	4.90571429	44.33655944	0.168919
8	-0.22979936	9.05769730	-2.08145304		8.00000000	4.29250000	38.88016566	0.190419
9	-0.21999702	9.04032140	-1.98884377		9.00000000	3.81555556	34.49384854	0.211787
10	-0.20984113	9.05446820	-1.89999984		10.00000000	3.43400000	31.09304380	0.233138
11	-0.20005366	9.05059150	-1.81060395		11.00000000	3.12181818	28.25430110	0.254511
12	-0.18981814	9.05558970	-1.71891519		12.00000000	2.86166667	25.91407919	0.276000
13	-0.18007831	9.05171110	-1.63001684		13.00000000	2.64153846	23.91044301	0.297384
14	-0.16995890	9.05267910	-1.53858338		14.00000000	2.45285714	22.20492859	0.318733
15	-0.16013646	9.04753590	-1.44884037		15.00000000	2.28933333	20.71282552	0.340109
16	-0.14996196	9.05669120	-1.35815916		16.00000000	2.14625000	19.43792349	0.361590
17	-0.13986488	9.03267960	-1.26335465		17.00000000	2.02000000	18.24601279	0.382966
18	-0.13000003	9.06974120	-1.17906663		18.00000000	1.90777778	17.30305071	0.404315
19	-0.11984935	9.04461190	-1.08399086		19.00000000	1.80736842	16.34694593	0.425708
20	-0.11003584	9.05595680	-0.99647981		20.00000000	1.71700000	15.54907783	0.447193
21	-0.09991047	9.04208370	-0.90339881		21.00000000	1.63523810	14.78595973	0.468597
22	-0.09007611	9.04903600	-0.81510197		22.00000000	1.56090909	14.12472256	0.489956
23	-0.07991204	9.04967500	-0.72317803		23.00000000	1.49304348	13.51155824	0.511326
24	-0.07008737	9.05356220	-0.63454033		24.00000000	1.43083333	12.95413858	0.532805
25	-0.05991064	9.04439160	-0.54185533		25.00000000	1.37360000	12.42337630	0.554195
26	-0.04979421	9.05409240	-0.45084133		26.00000000	1.32076923	11.95836665	0.575555
27	-0.03997772	9.04291820	-0.36151523		27.00000000	1.27185185	11.50125226	0.596941
28	-0.02983598	9.05254080	-0.27009138		28.00000000	1.22642857	11.10229468	0.618425
29	-0.01997185	9.05650620	-0.18087521		29.00000000	1.18413793	10.72415251	0.639801
30	-0.00983830	9.04916100	-0.08902833		30.00000000	1.14466667	10.35827296	0.661231
31	-0.00065148	9.05079360	-0.00589643		31.00000000	1.10774194	10.02594362	0.682706
32	0.00954513	9.04236410	0.08631055		32.00000000	1.07312500	9.70358697	0.704188
33	0.01933752	9.04799460	0.17496578		33.00000000	1.04060606	9.41539802	0.725572
34	0.02952512	9.04751110	0.26712885		34.00000000	1.01000000	9.13798621	0.746955
35	0.03929146	9.04996590	0.35558637		35.00000000	0.98114286	8.87930940	0.768336
36	0.04940910	9.04568480	0.44693914		36.00000000	0.95388889	8.62857822	0.789820
37	0.05927964	9.04363250	0.53610327		37.00000000	0.92810811	8.39346865	0.811185
38	0.06943970	9.04772090	0.62827104		38.00000000	0.90368421	8.17628252	0.832569
39	0.07948738	9.05709170	0.71992445		39.00000000	0.88051282	7.97488536	0.854046
40	0.08935569	9.04226590	0.80797786		40.00000000	0.85850000	7.76278528	0.875426
41	0.09952244	9.05319020	0.90099560		41.00000000	0.83756098	7.58259882	0.896795
42	0.10928655	9.04909610	0.98894449		42.00000000	0.81761905	7.39871334	0.918166
43	0.11946150	9.04513450	1.08054534		43.00000000	0.79860465	7.22348648	0.939641
44	0.12933502	9.04373070	1.16967109		44.00000000	0.78045455	7.05822073	0.961033
45	0.13944075	9.03511140	1.25986271		45.00000000	0.76311111	6.89479390	0.982381
46	0.14927556	9.05923750	1.35232275		46.00000000	0.74652174	6.76291773	1.003753
47	0.15942594	9.04952810	1.44272952		47.00000000	0.73063830	6.61193181	1.025253
48	0.16954954	9.04288670	1.53321728		48.00000000	0.71541667	6.46943186	1.046628
49	0.17939104	9.03959370	1.62162212		49.00000000	0.70081633	6.33509485	1.067981
50	0.18953994	9.05799960	1.71685270		50.00000000	0.68680000	6.22103413	1.089365
51	0.19930404	9.03707410	1.80112538		51.00000000	0.67333333	6.08496323	1.110845
52	0.20950058	9.04790970	1.89554233		52.00000000	0.66038462	5.97510037	1.132228
53	0.21927288	9.05376240	1.98524456		53.00000000	0.64792453	5.86615473	1.153582
54	0.22943294	9.04837510	2.07599530		54.00000000	0.63592593	5.75409631	1.174952
55	0.23921417	9.03586200	2.16150623		55.00000000	0.62436364	5.64166366	1.196437
56	0.24940400	9.04166130	2.25502649		56.00000000	0.61321429	5.54447588	1.217806
57	0.25956777	9.04571150	2.34797516		57.00000000	0.60245614	5.44964444	1.239146
58	0.26939812	9.04736420	2.43734291		58.00000000	0.59206897	5.35666356	1.260533
59	0.27952245	9.04654120	2.52871136		59.00000000	0.58203390	5.26539364	1.282008
60	0.28936547	9.04511930	2.61734520		60.00000000	0.57233333	5.17682328	1.303381
61	0.29954189	9.05200670	2.71145520		61.00000000	0.56295082	5.09583459	1.324759
62	0.30936405	9.05319310	2.80073248		62.00000000	0.55387097	5.01430082	1.346119
63	0.31954125	9.04294680	2.88959452		63.00000000	0.54507937	4.92912370	1.367595
64	0.32929343	9.05627920	2.98217324		64.00000000	0.53656250	4.85925981	1.388981
65	0.33945945	9.03894620	3.06835571		65.00000000	0.52830769	4.77534481	1.410376
66	0.34922355	9.04598900	3.15907239		66.00000000	0.52030303	4.70665549	1.431740
67	0.35939851	9.05847170	3.25560123		67.00000000	0.51253731	4.64280475	1.453217
68	0.36956528	9.03663830	3.33962776		68.00000000	0.50500000	4.56350234	1.474593
69	0.37941423	9.04742720	3.43272262		69.00000000	0.49768116	4.50273406	1.495983
70	0.38955715	9.04169180	3.52225569		70.00000000	0.49057143	4.43559566	1.517466
71	0.39933988	9.03628440	3.60854873		71.00000000	0.48366197	4.37050713	1.538841
72	0.40941808	9.05199150	3.70604898		72.00000000	0.47694444	4.31729706	1.560211
73	0.41924322	9.04415990	3.79170272		73.00000000	0.47041096	4.25447193	1.581597
74	0.42952460	9.04133800	3.88347709		74.00000000	0.46405405	4.19566955	1.603063
75	0.43931550	9.04152300	3.97208120		75.00000000	0.45786667	4.13981200	1.624445
76	0.44942123	9.04534820	4.06517151		76.00000000	0.45184211	4.08706917	1.645793
77	0.45959765	9.03778170	4.15374323		77.00000000	0.44597403	4.03061589	1.667165
78	0.46944216	9.03652290	4.24212483		78.00000000	0.44025641	3.97838713	1.688645
79	0.47953373	9.02565380	4.32810543		79.00000000	0.43468354	3.92330318	1.710025
80	0.48943329	9.00916100	4.40938331		80.00000000	0.42925000	3.86718236	1.731393
81	0.49956656	9.00341990	4.49780751		81.00000000	0.42395062	3.81700542	1.752770
82	0.50930166	9.00157260	4.58451587		82.00000000	0.41878049	3.76968296	1.774247
83	0.51950264	8.96750640	4.65864325		83.00000000	0.41373494	3.71017072	1.795630
84	0.52925259	8.94400600	4.73363834		84.00000000	0.40880952	3.65639483	1.816984
85	0.53943425	8.87547680	4.78773617		85.00000000	0.40400000	3.58569263	1.838361
86	0.54951912	8.82148460	4.84757445		86.00000000	0.39930233	3.52243932	1.859844
87	0.55935472	8.72740360	4.88171440		87.00000000	0.39471264	3.44481655	1.881225
88	0.56950212	8.58532710	4.88936198		88.00000000	0.39022727	3.35022878	1.902575
89	0.57935923	8.41257000	4.87390008		89.00000000	0.38584270	3.24592869	1.923956
90	0.58944935	8.14320760	4.80000843		90.00000000	0.38155556	3.10708610	1.945434
91	0.59924769	7.81128550	4.68089479		91.00000000	0.37736264	2.94768730	1.966818
92	0.60933703	7.32190040	4.46150504		92.00000000	0.37326087	2.73297891	1.988299
93	0.61919570	6.69823500	4.14751831		93.00000000	0.36924731	2.47330527	2.009699
94	0.62927312	5.87865640	3.69928045		94.00000000	0.36531915	2.14758575	2.031192
95	0.63938111	4.81163840	3.07647070		95.00000000	0.36147368	1.73928066	2.052572
96	0.64917350	3.52508470	2.28839157		96.00000000	0.35770833	1.26095217	2.074000
97	0.65933728	1.89311610	1.24820202		97.00000000	0.35402062	0.67020213	2.095370
98	0.66908723	0.00116980	0.00078270		98.00000000	0.35040816	0.00040991	2.116858
99	0.67914307	-2.32190440	-1.57690528		99.00000000	0.34686869	-0.80539593	2.138231
100	0.68884844	-4.95147510	-3.41081590		100.00000000	0.34340000	-1.70033655	2.159627
101	0.69905907	-8.10193250	-5.66372940		101.00000000	0.34000000	-2.75465705	2.181120
11:33 03/04/2018
Test Lot:	JK-PERC
Recipe:	Recipe_YJX-LID
Cell Name:	1-20-11H
Test Order:	4
Test Condition:	Light
1	-0.29983351	9.04301260	-2.71139821		1.00000000	34.34000000	310.53705268	0.000000
2	-0.28996137	9.05727670	-2.62626036		2.00000000	17.17000000	155.51344094	0.061789
3	-0.27994335	9.04381080	-2.53175469		3.00000000	11.44666667	103.52148762	0.083211
4	-0.27008611	9.06268220	-2.44770458		4.00000000	8.58500000	77.80312669	0.104702
5	-0.25984183	9.04959490	-2.35146330		5.00000000	6.86800000	62.15261777	0.126123
6	-0.24974716	9.04665570	-2.25937657		6.00000000	5.72333333	51.77702612	0.147502
7	-0.23994572	9.05939960	-2.17376416		7.00000000	4.90571429	44.44282604	0.168880
8	-0.22974016	9.05257510	-2.07974005		8.00000000	4.29250000	38.85817862	0.190351
9	-0.21998338	9.05117700	-1.99110851		9.00000000	3.81555556	34.53526869	0.211753
10	-0.20977782	9.05413060	-1.89935578		10.00000000	3.43400000	31.09188448	0.233110
11	-0.19993843	9.05331330	-1.81010525		11.00000000	3.12181818	28.26279807	0.254489
12	-0.18981548	9.05036930	-1.71790019		12.00000000	2.86166667	25.89914015	0.275978
13	-0.18003340	9.05461310	-1.63013278		13.00000000	2.64153846	23.91810876	0.297353
14	-0.16989258	9.03793140	-1.53547748		14.00000000	2.45285714	22.16875459	0.318701
15	-0.16008595	9.05169110	-1.44904857		15.00000000	2.28933333	20.72233816	0.340074
16	-0.14991759	9.04514220	-1.35602592		16.00000000	2.14625000	19.41313645	0.361550
17	-0.13974699	9.03610900	-1.26276903		17.00000000	2.02000000	18.25294018	0.382947
18	-0.12992845	9.05277250	-1.17621270		18.00000000	1.90777778	17.27067820	0.404282
19	-0.11986578	9.06405350	-1.08646984		19.00000000	1.80736842	16.38208406	0.425660
20	-0.10998099	9.03067970	-0.99320309		20.00000000	1.71700000	15.50567704	0.447133
21	-0.09984539	9.06810760	-0.90540871		21.00000000	1.63523810	14.82851500	0.468513
22	-0.09008490	9.03978820	-0.81434837		22.00000000	1.56090909	14.11028758	0.489907
23	-0.07982201	9.04954620	-0.72235298		23.00000000	1.49304348	13.51136594	0.511269
24	-0.07012627	9.05106640	-0.63471755		24.00000000	1.43083333	12.95056751	0.532744
25	-0.05991624	9.04783250	-0.54211207		25.00000000	1.37360000	12.42810272	0.554113
26	-0.04976649	9.04622840	-0.45019899		26.00000000	1.32076923	11.94798013	0.575497
27	-0.03994943	9.04960350	-0.36152648		27.00000000	1.27185185	11.50975497	0.596840
28	-0.02973121	9.05072310	-0.26908890		28.00000000	1.22642857	11.10006540	0.618313
29	-0.01998709	9.04347990	-0.18075283		29.00000000	1.18413793	10.70872758	0.639697
30	-0.00982022	9.05458830	-0.08891804		30.00000000	1.14466667	10.36448541	0.661073
31	-0.00064101	9.04444500	-0.00579759		31.00000000	1.10774194	10.01891101	0.682672
32	0.00955021	9.05676460	0.08649400		32.00000000	1.07312500	9.71904051	0.704050
33	0.01933275	9.05210970	0.17500217		33.00000000	1.04060606	9.41968022	0.725391
34	0.02951496	9.04798130	0.26705080		34.00000000	1.01000000	9.13846111	0.746767
35	0.03935927	9.05552580	0.35641890		35.00000000	0.98114286	8.88476446	0.768239
36	0.04945664	9.03851220	0.44701442		36.00000000	0.95388889	8.62173636	0.789601
37	0.05932030	9.05119990	0.53691990		37.00000000	0.92810811	8.40049202	0.810958
38	0.06945934	9.04237840	0.62807764		38.00000000	0.90368421	8.17145459	0.832331
39	0.07955001	9.04737000	0.71971833		39.00000000	0.88051282	7.96632528	0.853801
40	0.08940698	9.04820630	0.80897275		40.00000000	0.85850000	7.76788511	0.875203
41	0.09957430	9.04579450	0.90072864		41.00000000	0.83756098	7.57640447	0.896549
42	0.10937767	9.05030060	0.98990079		42.00000000	0.81761905	7.39969816	0.917916
43	0.11953607	9.04507060	1.08121219		43.00000000	0.79860465	7.22343545	0.939389
44	0.12933201	9.03562640	1.16859572		44.00000000	0.78045455	7.05189569	0.960772
45	0.13953803	9.04838660	1.26259404		45.00000000	0.76311111	6.90492435	0.982134
46	0.14931461	9.04566290	1.35064963		46.00000000	0.74652174	6.75278400	1.003512
47	0.15951395	9.05017090	1.44362851		47.00000000	0.73063830	6.61240146	1.024986
48	0.16960163	9.03897950	1.53302566		48.00000000	0.71541667	6.46663658	1.046365
49	0.17941096	9.04904940	1.62349864		49.00000000	0.70081633	6.34172156	1.067710
50	0.18952248	9.04831980	1.71486001		50.00000000	0.68680000	6.21438604	1.089075
51	0.19934744	9.05584140	1.80525880		51.00000000	0.67333333	6.09759988	1.110575
52	0.20949987	9.04950330	1.89586976		52.00000000	0.66038462	5.97615276	1.131964
53	0.21926975	9.04310610	1.98287961		53.00000000	0.64792453	5.85925025	1.153320
54	0.22944155	9.04622550	2.07558000		54.00000000	0.63592593	5.75272933	1.174697
55	0.23926950	9.04494380	2.16417918		55.00000000	0.62436364	5.64733400	1.196170
56	0.24944277	9.05050750	2.25758366		56.00000000	0.61321429	5.54990049	1.217545
57	0.25956470	9.04523560	2.34782386		57.00000000	0.60245614	5.44935773	1.238929
58	0.26942316	9.05132680	2.43863707		58.00000000	0.59206897	5.35900970	1.260291
59	0.27954954	9.04563430	2.52870291		59.00000000	0.58203390	5.26486579	1.281773
60	0.28938195	9.04579640	2.61769020		60.00000000	0.57233333	5.17721081	1.303145
61	0.29948527	9.04516410	2.70889341		61.00000000	0.56295082	5.09198254	1.324531
62	0.30932435	9.05249020	2.80015565		62.00000000	0.55387097	5.01391151	1.346013
63	0.31942469	9.03777410	2.88688819		63.00000000	0.54507937	4.92630417	1.367389
64	0.32932857	9.05638690	2.98252695		64.00000000	0.53656250	4.85931760	1.388737
65	0.33942741	9.03509040	3.06675733		65.00000000	0.52830769	4.77330776	1.410121
66	0.34928885	9.04737660	3.16014777		66.00000000	0.52030303	4.70737746	1.431599
67	0.35944948	9.03365900	3.24714403		67.00000000	0.51253731	4.63008731	1.452980
68	0.36961603	9.06100850	3.34909399		68.00000000	0.50500000	4.57580929	1.474348
69	0.37943283	9.03336810	3.42755642		69.00000000	0.49768116	4.49573711	1.495732
70	0.38952720	9.04675770	3.52395820		70.00000000	0.49057143	4.43808085	1.517214
71	0.39944148	9.04070950	3.61123438		71.00000000	0.48366197	4.37264738	1.538603
72	0.40949419	9.05068300	3.70620210		72.00000000	0.47694444	4.31667298	1.559953
73	0.41934967	9.03158470	3.78739206		73.00000000	0.47041096	4.24855642	1.581335
74	0.42950508	9.05575940	3.88949467		74.00000000	0.46405405	4.20236186	1.602816
75	0.43933377	9.02992730	3.96715200		75.00000000	0.45786667	4.13450271	1.624188
76	0.44949365	9.04566760	4.06597015		76.00000000	0.45184211	4.08721349	1.645543
77	0.45961186	9.03500750	4.15259660		77.00000000	0.44597403	4.02937867	1.666918
78	0.46946806	9.03134440	4.23992773		78.00000000	0.44025641	3.97610727	1.688393
79	0.47963688	9.02647590	4.32943074		79.00000000	0.43468354	3.92366054	1.709780
80	0.48945218	9.01009080	4.41000858		80.00000000	0.42925000	3.86758148	1.731126
81	0.49954879	9.01301480	4.50244064		81.00000000	0.42395062	3.82107319	1.752496
82	0.50939608	8.97829250	4.57350700		82.00000000	0.41878049	3.75993371	1.773977
83	0.51956415	8.97702120	4.66413839		83.00000000	0.41373494	3.71410733	1.795355
84	0.52928489	8.92185020	4.72220050		84.00000000	0.40880952	3.64733733	1.816715
85	0.53939790	8.88202950	4.79094806		85.00000000	0.40400000	3.58833992	1.838082
86	0.54965824	8.81622600	4.84591127		86.00000000	0.39930233	3.52033954	1.859557
87	0.55939317	8.72823330	4.88251409		87.00000000	0.39471264	3.44514404	1.880938
88	0.56958950	8.58244040	4.88846794		88.00000000	0.39022727	3.34910231	1.902322
89	0.57935643	8.39096640	4.86136034		89.00000000	0.38584270	3.23759310	1.923667
90	0.58941287	8.12937070	4.79155572		90.00000000	0.38155556	3.10180655	1.945135
91	0.59925795	7.78522590	4.66535851		91.00000000	0.37736264	2.93785338	1.966517
92	0.60938579	7.30262330	4.45011487		92.00000000	0.37326087	2.72578352	1.987981
93	0.61919361	6.68224190	4.13760148		93.00000000	0.36924731	2.46739986	2.009507
94	0.62925529	5.85060070	3.68152144		94.00000000	0.36531915	2.13733647	2.030887
95	0.63936830	4.78987170	3.06249213		95.00000000	0.36147368	1.73141257	2.052235
96	0.64917094	3.51312300	2.28061736		96.00000000	0.35770833	1.25667337	2.073625
97	0.65935683	1.88321640	1.24171160		97.00000000	0.35402062	0.66669743	2.095113
98	0.66902697	-0.01186594	-0.00793863		98.00000000	0.35040816	-0.00415792	2.116551
99	0.67913550	-2.31541130	-1.57247801		99.00000000	0.34686869	-0.80314368	2.137924
100	0.68885928	-4.90842440	-3.38121370		100.00000000	0.34340000	-1.68555294	2.159298
101	0.69909060	-8.02126880	-5.60759362		101.00000000	0.34000000	-2.72723139	2.180775
