# Supplementary material for: Study on the Electrical Injection Regeneration of Industrialized B-Doped Czochralski Silicon PERC Solar Cells
Source: Hindawi journal article supplement (doi:10.1155/2019/5357370), 2019-06-20
Supplement: f1 [file 5357370.f1.zip › section3.1/IVRawData_1-20-12H.csv]

12:33 03/04/2018
Test Lot:	JK-PERC
Recipe:	Recipe_YJX-LID
Cell Name:	1-20-12H
Test Order:	2
Test Condition:	Light
1	-0.29992086	9.06830410	-2.71977356		1.00000000	34.34000000	311.40556279	0.000000
2	-0.29013816	9.07623290	-2.63336151		2.00000000	17.17000000	155.83891889	0.061816
3	-0.27996543	9.06478600	-2.53782671		3.00000000	11.44666667	103.76158375	0.083261
4	-0.27016413	9.07598780	-2.45200635		4.00000000	8.58500000	77.91735526	0.104749
5	-0.26001525	9.05811410	-2.35524780		5.00000000	6.86800000	62.21112764	0.126132
6	-0.24985890	9.07052900	-2.26635240		6.00000000	5.72333333	51.91366098	0.147494
7	-0.24004568	9.06932740	-2.17705286		7.00000000	4.90571429	44.49152899	0.168867
8	-0.22986330	9.07157800	-2.08522286		8.00000000	4.29250000	38.93974857	0.190357
9	-0.22009771	9.06701090	-1.99562834		9.00000000	3.81555556	34.59568381	0.211753
10	-0.20992947	9.06445880	-1.90289703		10.00000000	3.43400000	31.12735152	0.233094
11	-0.20006861	9.07199570	-1.81502157		11.00000000	3.12181818	28.32112112	0.254467
12	-0.18993089	9.06756780	-1.72221122		12.00000000	2.86166667	25.94835652	0.275956
13	-0.18014817	9.07082940	-1.63409332		13.00000000	2.64153846	23.96094474	0.297343
14	-0.17000003	9.06836890	-1.54162299		14.00000000	2.45285714	22.24341343	0.318691
15	-0.16015108	9.07845120	-1.45392376		15.00000000	2.28933333	20.78360095	0.340071
16	-0.15005131	9.06593890	-1.36035601		16.00000000	2.14625000	19.45777136	0.361568
17	-0.13990465	9.07464890	-1.26958558		17.00000000	2.02000000	18.33079078	0.382949
18	-0.13005422	9.07130810	-1.17976190		18.00000000	1.90777778	17.30604001	0.404295
19	-0.11995966	9.07530980	-1.08867108		19.00000000	1.80736842	16.40242834	0.425668
20	-0.11011369	9.07231900	-0.99898652		20.00000000	1.71700000	15.57717172	0.447144
21	-0.09995066	9.06102940	-0.90565583		21.00000000	1.63523810	14.81694046	0.468530
22	-0.09018134	9.07053180	-0.81799274		22.00000000	1.56090909	14.15827555	0.489908
23	-0.07995430	9.06564040	-0.72483697		23.00000000	1.49304348	13.53539528	0.511263
24	-0.07015894	9.06090930	-0.63570383		24.00000000	1.43083333	12.96465106	0.532744
25	-0.06004950	9.07390980	-0.54488372		25.00000000	1.37360000	12.46392250	0.554123
26	-0.04987009	9.06969930	-0.45230674		26.00000000	1.32076923	11.97897977	0.575517
27	-0.04003975	9.07408140	-0.36332397		27.00000000	1.27185185	11.54088723	0.596918
28	-0.02988788	9.06812380	-0.27102702		28.00000000	1.22642857	11.12140612	0.618389
29	-0.02012304	9.06959720	-0.18250784		29.00000000	1.18413793	10.73965406	0.639767
30	-0.00996596	9.07739450	-0.09046495		30.00000000	1.14466667	10.39059090	0.661126
31	-0.00072731	9.07400320	-0.00659965		31.00000000	1.10774194	10.05165387	0.682623
32	0.00945188	9.07444570	0.08577062		32.00000000	1.07312500	9.73801454	0.704116
33	0.01928864	9.06913380	0.17493129		33.00000000	1.04060606	9.43739560	0.725509
34	0.02940152	9.05875970	0.26634132		34.00000000	1.01000000	9.14934730	0.746891
35	0.03921968	9.07464410	0.35590461		35.00000000	0.98114286	8.90352224	0.768278
36	0.04937125	9.05789380	0.44719958		36.00000000	0.95388889	8.64022425	0.789761
37	0.05919983	9.07082940	0.53699155		37.00000000	0.92810811	8.41871031	0.811153
38	0.06936926	9.06018830	0.62849859		38.00000000	0.90368421	8.18754911	0.832544
39	0.07952680	9.06450370	0.72087095		39.00000000	0.88051282	7.98141172	0.853887
40	0.08932337	9.06351950	0.80958412		40.00000000	0.85850000	7.78103149	0.875357
41	0.09949727	9.07631110	0.90306821		41.00000000	0.83756098	7.60196398	0.896736
42	0.10930947	9.06534670	0.99092824		42.00000000	0.81761905	7.41200014	0.918118
43	0.11947445	9.07265280	1.08395020		43.00000000	0.79860465	7.24546272	0.939610
44	0.12927474	9.06712910	1.17215076		44.00000000	0.78045455	7.07648212	0.960994
45	0.13939060	9.07216070	1.26457392		45.00000000	0.76311111	6.92306663	0.982358
46	0.14924149	9.06990810	1.35360660		46.00000000	0.74652174	6.77088357	1.003728
47	0.15938340	9.06542490	1.44487824		47.00000000	0.73063830	6.62354662	1.025210
48	0.16952308	9.07534690	1.53848076		48.00000000	0.71541667	6.49265443	1.046598
49	0.17933601	9.05707070	1.62425892		49.00000000	0.70081633	6.34734302	1.067952
50	0.18949950	9.07280640	1.71929228		50.00000000	0.68680000	6.23120344	1.089325
51	0.19926779	9.06989960	1.80733885		51.00000000	0.67333333	6.10706573	1.110814
52	0.20941788	9.06994820	1.89940932		52.00000000	0.66038462	5.98965425	1.132179
53	0.21926953	9.06148340	1.98690721		53.00000000	0.64792453	5.87115736	1.153526
54	0.22939505	9.07596400	2.08198122		54.00000000	0.63592593	5.77164081	1.174911
55	0.23919013	9.06193260	2.16752484		55.00000000	0.62436364	5.65794119	1.196386
56	0.24932683	9.08332920	2.26471768		56.00000000	0.61321429	5.57002723	1.217773
57	0.25946203	9.07175830	2.35377682		57.00000000	0.60245614	5.46533649	1.239134
58	0.26931739	9.07473560	2.44398411		58.00000000	0.59206897	5.37286932	1.260510
59	0.27946302	9.07493970	2.53611005		59.00000000	0.58203390	5.28192253	1.281992
60	0.28930426	9.06670190	2.62303548		60.00000000	0.57233333	5.18917572	1.303384
61	0.29940969	9.06577400	2.71438058		61.00000000	0.56295082	5.10358490	1.324736
62	0.30923900	9.07329080	2.80581537		62.00000000	0.55387097	5.02543236	1.346122
63	0.31939355	9.05728440	2.89283822		63.00000000	0.54507937	4.93693883	1.367600
64	0.32922807	9.06839080	2.98556880		64.00000000	0.53656250	4.86575844	1.388974
65	0.33936104	9.07435890	3.07948387		65.00000000	0.52830769	4.79405361	1.410354
66	0.34918442	9.07031540	3.16721282		66.00000000	0.52030303	4.71931259	1.431726
67	0.35935089	9.06116100	3.25613627		67.00000000	0.51253731	4.64418312	1.453204
68	0.36949500	9.06785010	3.35052527		68.00000000	0.50500000	4.57926430	1.474592
69	0.37929755	9.06397150	3.43794218		69.00000000	0.49768116	4.51096785	1.495977
70	0.38946179	9.07481770	3.53429475		70.00000000	0.49057143	4.45184628	1.517331
71	0.39928290	9.05476950	3.61541462		71.00000000	0.48366197	4.37944767	1.538811
72	0.40945235	9.06923010	3.71341758		72.00000000	0.47694444	4.32551891	1.560196
73	0.41924667	9.05102920	3.79461385		73.00000000	0.47041096	4.25770333	1.581623
74	0.42941016	9.05596450	3.88872316		74.00000000	0.46405405	4.20245704	1.603104
75	0.43923873	9.06810380	3.98306240		75.00000000	0.45786667	4.15198246	1.624489
76	0.44935384	9.05235480	4.06771039		76.00000000	0.45184211	4.09023505	1.645851
77	0.45952553	9.06157490	4.16402501		77.00000000	0.44597403	4.04122704	1.667224
78	0.46937194	9.05452250	4.24993879		78.00000000	0.44025641	3.98631157	1.688701
79	0.47951236	9.04595950	4.33764939		79.00000000	0.43468354	3.93212974	1.710087
80	0.48933724	9.04805090	4.42754825		80.00000000	0.42925000	3.88387585	1.731442
81	0.49945381	9.02118970	4.50566757		81.00000000	0.42395062	3.82453894	1.752818
82	0.50931066	9.02491860	4.59648725		82.00000000	0.41878049	3.77945981	1.774306
83	0.51943028	8.98470020	4.66692534		83.00000000	0.41373494	3.71728440	1.795677
84	0.52921861	8.95142080	4.73725847		84.00000000	0.40880952	3.65942607	1.817043
85	0.53938210	8.92385960	4.81337013		85.00000000	0.40400000	3.60523928	1.838429
86	0.54951656	8.84067250	4.85809594		86.00000000	0.39930233	3.53010109	1.859905
87	0.55928785	8.75031760	4.89394632		87.00000000	0.39471264	3.45386099	1.881287
88	0.56941932	8.62248990	4.90981234		88.00000000	0.39022727	3.36473072	1.902644
89	0.57923007	8.45169930	4.89547838		89.00000000	0.38584270	3.26102645	1.924022
90	0.58937788	8.18700310	4.82523853		90.00000000	0.38155556	3.12379652	1.945504
91	0.59919679	7.85588220	4.70721940		91.00000000	0.37736264	2.96451643	1.966877
92	0.60929924	7.38179490	4.49772202		92.00000000	0.37326087	2.75533518	1.988343
93	0.61910701	6.77315900	4.19331022		93.00000000	0.36924731	2.50097075	2.009759
94	0.62923473	5.94767620	3.74248443		94.00000000	0.36531915	2.17280001	2.031287
95	0.63932085	4.88635640	3.12394953		95.00000000	0.36147368	1.76628925	2.052685
96	0.64911890	3.59305240	2.33231822		96.00000000	0.35770833	1.28526479	2.074068
97	0.65918189	1.94652780	1.28311587		97.00000000	0.35402062	0.68911098	2.095432
98	0.66897029	0.01668038	0.01115868		98.00000000	0.35040816	0.00584494	2.116911
99	0.67903554	-2.35273340	-1.59758959		99.00000000	0.34686869	-0.81608955	2.138298
100	0.68878371	-5.04144760	-3.47246698		100.00000000	0.34340000	-1.73123311	2.159680
101	0.69898444	-8.27456570	-5.78379267		101.00000000	0.34000000	-2.81335234	2.181041
12:33 03/04/2018
Test Lot:	JK-PERC
Recipe:	Recipe_YJX-LID
Cell Name:	1-20-12H
Test Order:	3
Test Condition:	Light
1	-0.29983875	9.06997390	-2.71952964		1.00000000	34.34000000	311.46290373	0.000000
2	-0.29002702	9.07036780	-2.63065174		2.00000000	17.17000000	155.73821513	0.061823
3	-0.27993914	9.07088570	-2.53929594		3.00000000	11.44666667	103.83140498	0.083262
4	-0.27007976	9.06613250	-2.44857889		4.00000000	8.58500000	77.83274751	0.104759
5	-0.25994572	9.06671810	-2.35685456		5.00000000	6.86800000	62.27021991	0.126129
6	-0.24976407	9.08463860	-2.26901631		6.00000000	5.72333333	51.99441492	0.147520
7	-0.23993744	9.06623740	-2.17532979		7.00000000	4.90571429	44.47637033	0.168856
8	-0.22978853	9.06646440	-2.08336953		8.00000000	4.29250000	38.91779844	0.190340
9	-0.21992169	9.07304190	-1.99535871		9.00000000	3.81555556	34.61869543	0.211730
10	-0.20982489	9.07196710	-1.90352450		10.00000000	3.43400000	31.15313502	0.233099
11	-0.20001017	9.06991770	-1.81407578		11.00000000	3.12181818	28.31463398	0.254508
12	-0.18984860	9.06730270	-1.72141472		12.00000000	2.86166667	25.94759789	0.275964
13	-0.18007703	9.07465550	-1.63413701		13.00000000	2.64153846	23.97105153	0.297341
14	-0.16996236	9.05522160	-1.53904683		14.00000000	2.45285714	22.21116498	0.318740
15	-0.16011339	9.07891940	-1.45365656		15.00000000	2.28933333	20.78467281	0.340097
16	-0.14991984	9.07835200	-1.36102508		16.00000000	2.14625000	19.48441298	0.361587
17	-0.13976125	9.06394960	-1.26678893		17.00000000	2.02000000	18.30917819	0.382975
18	-0.13000384	9.07270150	-1.17948603		18.00000000	1.90777778	17.30869831	0.404322
19	-0.11982515	9.06098560	-1.08573396		19.00000000	1.80736842	16.37653924	0.425678
20	-0.10998438	9.07300190	-0.99788849		20.00000000	1.71700000	15.57834426	0.447157
21	-0.09981463	9.06341360	-0.90466128		21.00000000	1.63523810	14.82083919	0.468522
22	-0.09001181	9.06469920	-0.81592994		22.00000000	1.56090909	14.14917139	0.489897
23	-0.07987704	9.06573390	-0.72414400		23.00000000	1.49304348	13.53553488	0.511255
24	-0.07003701	9.06220050	-0.63468940		24.00000000	1.43083333	12.96649855	0.532724
25	-0.05992903	9.06515980	-0.54326625		25.00000000	1.37360000	12.45190350	0.554107
26	-0.04977417	9.06616400	-0.45126079		26.00000000	1.32076923	11.97431045	0.575492
27	-0.03995274	9.07319830	-0.36249917		27.00000000	1.27185185	11.53976406	0.596964
28	-0.02977406	9.07162480	-0.27009914		28.00000000	1.22642857	11.12569984	0.618333
29	-0.01996455	9.06416990	-0.18096204		29.00000000	1.18413793	10.73322739	0.639681
30	-0.00981340	9.06252100	-0.08893419		30.00000000	1.14466667	10.37356570	0.661056
31	-0.00056507	9.08124070	-0.00513152		31.00000000	1.10774194	10.05967115	0.682650
32	0.00957619	9.06623270	0.08681994		32.00000000	1.07312500	9.72920097	0.704034
33	0.01938543	9.06686880	0.17576512		33.00000000	1.04060606	9.43503862	0.725374
34	0.02949311	9.06664470	0.26740357		34.00000000	1.01000000	9.15731115	0.746748
35	0.03928226	9.05966570	0.35588410		35.00000000	0.98114286	8.88882629	0.768228
36	0.04948521	9.07030300	0.44884582		36.00000000	0.95388889	8.65206125	0.789605
37	0.05928402	9.06882950	0.53763671		37.00000000	0.92810811	8.41685419	0.810968
38	0.06942892	9.07006070	0.62972453		38.00000000	0.90368421	8.19647064	0.832344
39	0.07955968	9.06473060	0.72118703		39.00000000	0.88051282	7.98161151	0.853819
40	0.08940464	9.07356550	0.81121888		40.00000000	0.85850000	7.78965598	0.875213
41	0.09955028	9.06516650	0.90243990		41.00000000	0.83756098	7.59262970	0.896569
42	0.10936399	9.06966690	0.99189496		42.00000000	0.81761905	7.41553241	0.917941
43	0.11954089	9.06451700	1.08358043		43.00000000	0.79860465	7.23896544	0.939421
44	0.12934642	9.06870940	1.17300509		44.00000000	0.78045455	7.07771547	0.960792
45	0.13947567	9.06505970	1.26435528		45.00000000	0.76311111	6.91764778	0.982194
46	0.14931692	9.07066150	1.35440324		46.00000000	0.74652174	6.77144600	1.003568
47	0.15947521	9.06419180	1.44551389		47.00000000	0.73063830	6.62264567	1.025042
48	0.16960448	9.06604100	1.53764117		48.00000000	0.71541667	6.48599683	1.046440
49	0.17944051	9.07498930	1.62842071		49.00000000	0.70081633	6.35990066	1.067797
50	0.18958987	9.05723760	1.71716050		50.00000000	0.68680000	6.22051078	1.089158
51	0.19938646	9.06838890	1.80811396		51.00000000	0.67333333	6.10604853	1.110634
52	0.20956336	9.06873610	1.90047481		52.00000000	0.66038462	5.98885380	1.132008
53	0.21935475	9.06696030	1.98888081		53.00000000	0.64792453	5.87470598	1.153380
54	0.22950038	9.07265760	2.08217837		54.00000000	0.63592593	5.76953818	1.174734
55	0.23929772	9.06552030	2.16935834		55.00000000	0.62436364	5.66018122	1.196221
56	0.24947685	9.06466200	2.26142332		56.00000000	0.61321429	5.55858023	1.217591
57	0.25960687	9.06891630	2.35435297		57.00000000	0.60245614	5.46362431	1.238978
58	0.26945406	9.06722260	2.44319994		58.00000000	0.59206897	5.36842110	1.260468
59	0.27959150	9.06069370	2.53329294		59.00000000	0.58203390	5.27363088	1.281844
60	0.28940821	9.06960200	2.62481728		60.00000000	0.57233333	5.19083554	1.303203
61	0.29956648	9.05781170	2.71341677		61.00000000	0.56295082	5.09910252	1.324575
62	0.30935565	9.06414320	2.80404391		62.00000000	0.55387097	5.02036577	1.346052
63	0.31950128	9.06430340	2.89605654		63.00000000	0.54507937	4.94076474	1.367436
64	0.32931647	9.07330510	2.98798881		64.00000000	0.53656250	4.86839527	1.388783
65	0.33947775	9.06408310	3.07705454		65.00000000	0.52830769	4.78862483	1.410159
66	0.34929368	9.06311040	3.16568718		66.00000000	0.52030303	4.71556381	1.431631
67	0.35944825	9.07079700	3.26048211		67.00000000	0.51253731	4.64912193	1.453008
68	0.36958271	9.05707740	3.34733921		68.00000000	0.50500000	4.57382409	1.474372
69	0.37941578	9.06127740	3.43799163		69.00000000	0.49768116	4.50962704	1.495751
70	0.38958895	9.05651000	3.52831622		70.00000000	0.49057143	4.44286505	1.517222
71	0.39940637	9.06549360	3.62081589		71.00000000	0.48366197	4.38463451	1.538619
72	0.40952972	9.05504610	3.70831049		72.00000000	0.47694444	4.31875393	1.559965
73	0.41935679	9.05700870	3.79811810		73.00000000	0.47041096	4.26051615	1.581344
74	0.42949948	9.06424520	3.89308860		74.00000000	0.46405405	4.20629973	1.602831
75	0.43932879	9.05266280	3.97709539		75.00000000	0.45786667	4.14491254	1.624199
76	0.44948187	9.05516820	4.07013394		76.00000000	0.45184211	4.09150626	1.645554
77	0.45962083	9.05943680	4.16390586		77.00000000	0.44597403	4.04027350	1.666922
78	0.46944571	9.04187200	4.24466802		78.00000000	0.44025641	3.98074211	1.688395
79	0.47959283	9.05177880	4.34116821		79.00000000	0.43468354	3.93465929	1.709783
80	0.48940727	9.03546330	4.42202143		80.00000000	0.42925000	3.87847262	1.731139
81	0.49953803	9.02620600	4.50893316		81.00000000	0.42395062	3.82666561	1.752496
82	0.50939786	9.00670050	4.58799396		82.00000000	0.41878049	3.77183043	1.773978
83	0.51955396	8.99613670	4.67397845		83.00000000	0.41373494	3.72201608	1.795356
84	0.52929991	8.96271710	4.74396535		84.00000000	0.40880952	3.66404411	1.816726
85	0.53944629	8.90771580	4.80523424		85.00000000	0.40400000	3.59871718	1.838085
86	0.54960608	8.85337070	4.86586637		86.00000000	0.39930233	3.53517151	1.859552
87	0.55942875	8.75367740	4.89705881		87.00000000	0.39471264	3.45518715	1.880931
88	0.56959522	8.62160110	4.91082278		88.00000000	0.39022727	3.36438388	1.902328
89	0.57937992	8.44769860	4.89442694		89.00000000	0.38584270	3.25948281	1.923798
90	0.58948159	8.18266010	4.82352749		90.00000000	0.38155556	3.12213942	1.945181
91	0.59927744	7.85519980	4.70744403		91.00000000	0.37736264	2.96425891	1.966525
92	0.60940671	7.38171530	4.49846684		92.00000000	0.37326087	2.75530547	1.987997
93	0.61922115	6.76721530	4.19040284		93.00000000	0.36924731	2.49877606	2.009530
94	0.62931770	5.96331640	3.75282056		94.00000000	0.36531915	2.17851367	2.030912
95	0.63943136	4.89742710	3.13156847		95.00000000	0.36147368	1.77029102	2.052315
96	0.64925247	3.59962180	2.33706334		96.00000000	0.35770833	1.28761471	2.073715
97	0.65925747	1.94602740	1.28293310		97.00000000	0.35402062	0.68893382	2.095205
98	0.66907191	0.00443660	0.00296840		98.00000000	0.35040816	0.00155462	2.116569
99	0.67913944	-2.37462430	-1.61270102		99.00000000	0.34686869	-0.82368281	2.137924
100	0.68887943	-5.08595040	-3.50360661		100.00000000	0.34340000	-1.74651537	2.159304
101	0.69907272	-8.35811520	-5.84293033		101.00000000	0.34000000	-2.84175917	2.180781
12:33 03/04/2018
Test Lot:	JK-PERC
Recipe:	Recipe_YJX-LID
Cell Name:	1-20-12H
Test Order:	4
Test Condition:	Light
1	-0.29987189	9.06302640	-2.71774686		1.00000000	34.34000000	311.22432658	0.000000
2	-0.29006442	9.07232860	-2.63155973		2.00000000	17.17000000	155.77188206	0.061786
3	-0.27995631	9.06163500	-2.53686190		3.00000000	11.44666667	103.72551530	0.083209
4	-0.27011463	9.07405760	-2.45103571		4.00000000	8.58500000	77.90078450	0.104739
5	-0.25995141	9.06378080	-2.35614260		5.00000000	6.86800000	62.25004653	0.126141
6	-0.24980606	9.08424280	-2.26929890		6.00000000	5.72333333	51.99214963	0.147490
7	-0.23995842	9.05514140	-2.17285742		7.00000000	4.90571429	44.42193653	0.168858
8	-0.22983168	9.09066580	-2.08932299		8.00000000	4.29250000	39.02168295	0.190348
9	-0.22000265	9.06734560	-1.99484006		9.00000000	3.81555556	34.59696088	0.211723
10	-0.20988560	9.06712340	-1.90305864		10.00000000	3.43400000	31.13650176	0.233076
11	-0.20005953	9.07832810	-1.81620605		11.00000000	3.12181818	28.34088972	0.254451
12	-0.18988962	9.06015970	-1.72043028		12.00000000	2.86166667	25.92715701	0.275923
13	-0.18014397	9.06575490	-1.63314108		13.00000000	2.64153846	23.94754025	0.297303
14	-0.16997777	9.07080840	-1.54183578		14.00000000	2.45285714	22.24939718	0.318651
15	-0.16016437	9.07423310	-1.45336883		15.00000000	2.28933333	20.77394431	0.340030
16	-0.15001754	9.07128240	-1.36085147		16.00000000	2.14625000	19.46923985	0.361503
17	-0.13988931	9.05679700	-1.26694908		17.00000000	2.02000000	18.29472994	0.382888
18	-0.13005432	9.08295250	-1.18127721		18.00000000	1.90777778	17.32825494	0.404228
19	-0.11989484	9.06255250	-1.08655328		19.00000000	1.80736842	16.37937120	0.425604
20	-0.11005390	9.07687280	-0.99894525		20.00000000	1.71700000	15.58499060	0.447078
21	-0.09994949	9.06091880	-0.90563419		21.00000000	1.63523810	14.81675960	0.468457
22	-0.09008920	9.06449320	-0.81661296		22.00000000	1.56090909	14.14884984	0.489855
23	-0.08000860	9.06398960	-0.72519715		23.00000000	1.49304348	13.53293056	0.511214
24	-0.07012450	9.06902600	-0.63596090		24.00000000	1.43083333	12.97626470	0.532678
25	-0.05999850	9.07061960	-0.54422358		25.00000000	1.37360000	12.45940308	0.554039
26	-0.04986208	9.05798530	-0.45165001		26.00000000	1.32076923	11.96350828	0.575416
27	-0.04001445	9.07532410	-0.36314410		27.00000000	1.27185185	11.54246776	0.596829
28	-0.02986315	9.06018260	-0.27056556		28.00000000	1.22642857	11.11166680	0.618277
29	-0.02005049	9.06697650	-0.18179734		29.00000000	1.18413793	10.73655079	0.639652
30	-0.00988654	9.06638240	-0.08963512		30.00000000	1.14466667	10.37798572	0.661042
31	-0.00063507	9.06955810	-0.00575985		31.00000000	1.10774194	10.04672984	0.682635
32	0.00951230	9.06606200	0.08623909		32.00000000	1.07312500	9.72901778	0.704017
33	0.01929341	9.07386780	0.17506588		33.00000000	1.04060606	9.44232183	0.725379
34	0.02947196	9.06038480	0.26702733		34.00000000	1.01000000	9.15098865	0.746751
35	0.03926275	9.06904130	0.35607553		35.00000000	0.98114286	8.89802509	0.768231
36	0.04940856	9.05559350	0.44742383		36.00000000	0.95388889	8.63803002	0.789626
37	0.05925368	9.07085700	0.53748167		37.00000000	0.92810811	8.41873593	0.810973
38	0.06935930	9.06430630	0.62869389		38.00000000	0.90368421	8.19127048	0.832351
39	0.07954975	9.07364560	0.72180626		39.00000000	0.88051282	7.98946128	0.853825
40	0.08934575	9.05937480	0.80941666		40.00000000	0.85850000	7.77747327	0.875220
41	0.09952802	9.06314180	0.90203658		41.00000000	0.83756098	7.59093389	0.896588
42	0.10932551	9.06403920	0.99093071		42.00000000	0.81761905	7.41093110	0.917963
43	0.11945941	9.06963830	1.08345364		43.00000000	0.79860465	7.24305533	0.939441
44	0.12928890	9.07341860	1.17309231		44.00000000	0.78045455	7.08139079	0.960827
45	0.13941684	9.07127090	1.26468792		45.00000000	0.76311111	6.92238762	0.982179
46	0.14923294	9.06385230	1.35262533		46.00000000	0.74652174	6.76636278	1.003555
47	0.15941149	9.06129070	1.44447385		47.00000000	0.73063830	6.62052601	1.025037
48	0.16955060	9.07155610	1.53808778		48.00000000	0.71541667	6.48994243	1.046406
49	0.17935553	9.07076170	1.62689127		49.00000000	0.70081633	6.35693789	1.067746
50	0.18948719	9.06649780	1.71798519		50.00000000	0.68680000	6.22687069	1.089125
51	0.19927724	9.06825540	1.80709691		51.00000000	0.67333333	6.10595864	1.110595
52	0.20942676	9.05974200	1.89735241		52.00000000	0.66038462	5.98291424	1.131991
53	0.21927039	9.06632610	1.98797686		53.00000000	0.64792453	5.87429506	1.153376
54	0.22943629	9.07092000	2.08119823		54.00000000	0.63592593	5.76843320	1.174722
55	0.23924048	9.06887720	2.16964253		55.00000000	0.62436364	5.66227715	1.196195
56	0.24937065	9.06296160	2.26003663		56.00000000	0.61321429	5.55753752	1.217566
57	0.25951570	9.06432150	2.35233374		57.00000000	0.60245614	5.46085615	1.238949
58	0.26934072	9.07327180	2.44380156		58.00000000	0.59206897	5.37200265	1.260366
59	0.27948207	9.05442520	2.53054950		59.00000000	0.58203390	5.26998240	1.281840
60	0.28935400	9.07238390	2.62513057		60.00000000	0.57233333	5.19242772	1.303207
61	0.29947004	9.07001400	2.71619746		61.00000000	0.56295082	5.10597182	1.324594
62	0.30928984	9.05279350	2.79993705		62.00000000	0.55387097	5.01407950	1.346071
63	0.31945649	9.06116390	2.89464761		63.00000000	0.54507937	4.93905347	1.367451
64	0.32927331	9.06836700	2.98597122		64.00000000	0.53656250	4.86574567	1.388821
65	0.33941615	9.06914620	3.07821469		65.00000000	0.52830769	4.79129970	1.410193
66	0.34923077	9.06477070	3.16569685		66.00000000	0.52030303	4.71642766	1.431668
67	0.35939592	9.07081030	3.26001221		67.00000000	0.51253731	4.64912874	1.453050
68	0.36953279	9.06504920	3.34983292		68.00000000	0.50500000	4.57784985	1.474392
69	0.37937790	9.05774780	3.43630934		69.00000000	0.49768116	4.50787043	1.495773
70	0.38952148	9.06839850	3.53233600		70.00000000	0.49057143	4.44869721	1.517254
71	0.39935619	9.05509950	3.61621004		71.00000000	0.48366197	4.37960728	1.538629
72	0.40946627	9.06908130	3.71348289		72.00000000	0.47694444	4.32544794	1.559985
73	0.41930318	9.05221750	3.79562358		73.00000000	0.47041096	4.25826231	1.581361
74	0.42944378	9.07670970	3.89793652		74.00000000	0.46405405	4.21208393	1.602846
75	0.43926212	9.06563850	3.98219159		75.00000000	0.45786667	4.15085368	1.624243
76	0.44943246	9.05072400	4.06768915		76.00000000	0.45184211	4.08949819	1.645586
77	0.45955223	9.06728360	4.16689040		77.00000000	0.44597403	4.04377297	1.666959
78	0.46943530	9.05846020	4.25236098		78.00000000	0.44025641	3.98804517	1.688442
79	0.47954911	9.04114820	4.33567457		79.00000000	0.43468354	3.93003834	1.709827
80	0.48939201	9.04674340	4.42740394		80.00000000	0.42925000	3.88331460	1.731164
81	0.49952516	9.02521040	4.50831967		81.00000000	0.42395062	3.82624352	1.752549
82	0.50932038	9.01169110	4.58983794		82.00000000	0.41878049	3.77392039	1.774023
83	0.51944685	8.99188140	4.67080447		83.00000000	0.41373494	3.72025551	1.795415
84	0.52926445	8.95765500	4.74096835		84.00000000	0.40880952	3.66197468	1.816811
85	0.53936261	8.91307640	4.80738015		85.00000000	0.40400000	3.60088287	1.838175
86	0.54953295	8.84931280	4.86298897		86.00000000	0.39930233	3.53355118	1.859659
87	0.55936992	8.76014900	4.90016385		87.00000000	0.39471264	3.45774157	1.881049
88	0.56945693	8.62422080	4.91112230		88.00000000	0.39022727	3.36540616	1.902442
89	0.57926929	8.43502810	4.88615274		89.00000000	0.38584270	3.25459399	1.923802
90	0.58938235	8.19035530	4.82725085		90.00000000	0.38155556	3.12507557	1.945277
91	0.59922522	7.85690740	4.70805707		91.00000000	0.37736264	2.96490330	1.966647
92	0.60930628	7.36709170	4.48881524		92.00000000	0.37326087	2.74984705	1.988138
93	0.61913204	6.77194020	4.19272515		93.00000000	0.36924731	2.50052071	2.009660
94	0.62923694	5.93933920	3.73725162		94.00000000	0.36531915	2.16975434	2.031046
95	0.63939613	4.87419370	3.11654059		95.00000000	0.36147368	1.76189275	2.052408
96	0.64916980	3.58571150	2.32773562		96.00000000	0.35770833	1.28263888	2.073784
97	0.65923673	1.93217040	1.27375770		97.00000000	0.35402062	0.68402816	2.095282
98	0.66899997	-0.00781819	-0.00523037		98.00000000	0.35040816	-0.00273956	2.116677
99	0.67910409	-2.37639620	-1.61382038		99.00000000	0.34686869	-0.82429743	2.138039
100	0.68879515	-5.07228090	-3.49376248		100.00000000	0.34340000	-1.74182126	2.159424
101	0.69902581	-8.31694030	-5.81375593		101.00000000	0.34000000	-2.82775970	2.180911
