# Supplementary material for: Study on the Electrical Injection Regeneration of Industrialized B-Doped Czochralski Silicon PERC Solar Cells
Source: Hindawi journal article supplement (doi:10.1155/2019/5357370), 2019-06-20
Supplement: f1 [file 5357370.f1.zip › section3.2/IVMeasurementData.csv]

[DateTime]	[Grade]	[CellName]	[Order]	[Area (cm2)]	[Isc (A)]	[Jsc (mA/cm2)]	[Voc (V)]	[FF (%)]	[Eff (%)]	[Pmpp (W)]	[Rss (ohm)]	[Rshs (ohm)]	[Vmpp (V)]	[Impp (A)]	[Jmpp (mA/cm2)]	[IVLV1 (A)]	[IVLV2 (A)]	[Irradiance (W/m2)]	[Temp (deg C)]	[Rsh (ohm)]	[IVRV1 (mA)]	[IVRV2 (mA)]	[Rs (ohm)]	TkCurrent (%/K)	TkVoltage (%/K)	TkPower (%/K)	[Compensation]
10:20:04	Light	0	1	244.67	9.10141	37.2	0.6673	81.33%	20.19%	4.9395	1.9182	288.6199	0.568	8.6964	35.54	9.0829	9.054	51	24.98	0	0	0	0	0	0	0	0
10:20:50	Light	0	2	244.67	9.08006	37.11	0.6675	81.35%	20.15%	4.9309	1.9378	66.1628	0.568	8.6818	35.48	9.0805	9.0287	51	25.06	0	0	0	0	0	0	0	0
10:21:25	Light	0	3	244.67	9.07545	37.09	0.6675	81.38%	20.15%	4.9301	1.9353	295.4182	0.5681	8.6777	35.47	9.0885	9.0518	51	25.08	0	0	0	0	0	0	0	0
11:12:33	Light		0	244.67	9.09264	37.16	0.6701	81.26%	20.24%	4.9514	1.9402	43.8515	0.5697	8.6909	35.52	9.1005	9.0546	51	25.05	0	0	0	0	0	0	0	0
11:13:01	Light	0	1	244.67	9.0993	37.19	0.6702	81.17%	20.23%	4.9501	1.9402	55.1582	0.57	8.685	35.5	9.0863	9.0371	51	25.09	0	0	0	0	0	0	0	0
11:13:29	Light	0	2	244.67	9.08483	37.13	0.6702	81.25%	20.22%	4.9468	1.9427	123.469	0.5698	8.6811	35.48	9.0859	9.0445	51	25.09	0	0	0	0	0	0	0	0
11:16:10	Light	1-30	1	244.67	9.0381	36.94	0.6649	81.03%	19.90%	4.8695	1.8497	36.9049	0.5653	8.6136	35.2	9.0181	8.9842	51	25.03	0	0	0	0	0	0	0	0
11:16:27	Light	1-30	2	244.67	9.01959	36.86	0.6649	80.97%	19.85%	4.8561	1.8962	49.3663	0.5635	8.6185	35.22	9.029	8.9788	51	25.05	0	0	0	0	0	0	0	0
11:16:39	Light	1-30	3	244.67	9.02646	36.89	0.6647	80.88%	19.83%	4.8527	1.8889	400.4192	0.5636	8.611	35.19	9.0242	8.972	51	25.09	0	0	0	0	0	0	0	0
11:18:55	Light	1-20	1	244.67	9.02566	36.89	0.6661	81.14%	19.94%	4.8778	1.8962	39.0202	0.5662	8.6148	35.21	9.0229	8.9789	51	24.99	0	0	0	0	0	0	0	0
11:19:07	Light	1-20	2	244.67	9.02575	36.89	0.666	81.04%	19.91%	4.8717	1.9011	67.8801	0.566	8.6077	35.18	9.0309	8.9801	51	25.05	0	0	0	0	0	0	0	0
11:19:17	Light	1-20	3	244.67	9.02562	36.89	0.6659	80.99%	19.90%	4.8679	1.8937	45.0673	0.5658	8.6039	35.17	9.0165	8.9748	51	25.1	0	0	0	0	0	0	0	0
11:21:01	Light	1-10	1	244.67	9.0137	36.84	0.6655	81.13%	19.89%	4.8668	1.8766	456.1732	0.5656	8.6039	35.17	9.0299	8.9892	51	24.99	0	0	0	0	0	0	0	0
11:21:11	Light	1-10	2	244.67	9.0063	36.81	0.6654	81.06%	19.85%	4.8579	1.8913	3920.801	0.5649	8.5998	35.15	9.0113	8.9733	51	25.07	0	0	0	0	0	0	0	0
11:21:20	Light	1-10	3	244.67	9.01202	36.83	0.6652	80.94%	19.83%	4.8521	1.8913	119.9341	0.5643	8.5987	35.14	9.0107	8.9473	51	25.09339	0	0	0	0	0	0	0	0
11:23:48	Light	1-5	1	244.67	9.03501	36.93	0.6667	81.05%	19.96%	4.8825	1.9011	45.9104	0.567	8.6108	35.19	9.03	8.9909	51	24.98	0	0	0	0	0	0	0	0
11:23:57	Light	1-5	2	244.67	9.02856	36.9	0.6664	81.00%	19.92%	4.8734	1.8986	44.2332	0.5668	8.5982	35.14	9.013	8.962	51	25.06	0	0	0	0	0	0	0	0
11:24:06	Light	1-5	3	244.67	9.0249	36.89	0.6662	80.99%	19.90%	4.8697	1.8889	823.3877	0.5665	8.5962	35.13	9.0257	8.9835	51	25.09771	0	0	0	0	0	0	0	0
11:25:45	Light	1-2	1	244.67	9.03143	36.91	0.6659	81.13%	19.94%	4.8792	1.857	27.5338	0.5669	8.6071	35.18	9.031	8.9952	51	24.99	0	0	0	0	0	0	0	0
11:25:54	Light	1-2	2	244.67	9.02012	36.87	0.6658	81.09%	19.90%	4.8698	1.8766	228.79	0.5661	8.6019	35.16	9.0159	8.9735	51	25.07	0	0	0	0	0	0	0	0
11:26:03	Light	1-2	3	244.67	9.02422	36.88	0.6657	81.03%	19.90%	4.8677	1.8791	242.3345	0.5657	8.6054	35.17	9.0275	8.968	51	25.09771	0	0	0	0	0	0	0	0
11:27:55	Light	1-0	1	244.67	8.94218	36.55	0.6584	81.38%	19.58%	4.7912	1.7445	84.0853	0.56	8.5557	34.97	8.9506	8.8903	51	24.99	0	0	0	0	0	0	0	0
11:28:04	Light	1-0	2	244.67	8.95237	36.59	0.6583	81.18%	19.55%	4.7844	1.7616	46.141	0.5593	8.5543	34.96	8.9491	8.8972	51	25.06	0	0	0	0	0	0	0	0
11:28:14	Light	1-0	3	244.67	8.94382	36.55	0.6582	81.22%	19.54%	4.7811	1.7641	47.2647	0.5592	8.5497	34.94	8.9475	8.8954	51	25.08908	0	0	0	0	0	0	0	0
11:29:08	Light	1-0	4	244.67	8.95847	36.61	0.6583	81.18%	19.57%	4.7874	1.7567	169.5002	0.5594	8.5579	34.98	8.9435	8.894	51	25	0	0	0	0	0	0	0	0
11:36:19	Light	1-2-after	1	244.67	8.86236	36.22	0.6509	80.61%	19.01%	4.6502	1.7053	130.4561	0.5483	8.4813	34.66	8.8596	8.7893	51	25.04	0	0	0	0	0	0	0	0
11:36:33	Light	1-2-after	2	244.67	8.85511	36.19	0.6499	80.48%	18.93%	4.6315	1.7053	21.962	0.5469	8.469	34.61	8.8397	8.7674	51	25.09	0	0	0	0	0	0	0	0
11:36:42	Light	1-2-after	3	244.67	8.85249	36.18	0.6494	80.42%	18.90%	4.6234	1.6907	704.4655	0.5464	8.4612	34.58	8.8413	8.759	51	25.09988	0	0	0	0	0	0	0	0
11:39:12	Light	0	1	244.67	9.10019	37.19	0.6703	81.50%	20.32%	4.9711	1.8668	140.9355	0.5728	8.6789	35.47	9.0963	9.0626	51	24.98	0	0	0	0	0	0	0	0
11:39:44	Dark	0	2	244.67	0	0	0	0.00%	0.00%	0	0	0	0	0	0	0	0	0	0	406.04084	1.942	1.0785	0	0	0	0	0
11:45:23	Light	1-5-after	1	244.67	8.89462	36.35	0.6547	80.44%	19.15%	4.6842	1.8155	122.9912	0.5506	8.5078	34.77	8.8864	8.8272	51	25.04	0	0	0	0	0	0	0	0
11:45:35	Light	1-5-after	2	244.67	8.89375	36.35	0.6543	80.37%	19.11%	4.6768	1.8057	106.6793	0.5503	8.4994	34.74	8.8943	8.8121	51	25.09988	0	0	0	0	0	0	0	0
11:45:56	Light	1-5-after	3	244.67	8.87841	36.29	0.6541	80.54%	19.12%	4.6774	1.7861	63.5424	0.5504	8.4987	34.74	8.8914	8.8083	51	25.09988	0	0	0	0	0	0	0	0
12:02:13	Light	1-10-after	1	244.67	8.9262	36.48	0.6588	80.43%	19.33%	4.73	1.9011	142.5678	0.5542	8.5347	34.88	8.9339	8.8792	51	25.04	0	0	0	0	0	0	0	0
12:02:24	Light	1-10-after	2	244.67	8.92012	36.46	0.6583	80.42%	19.30%	4.7226	1.9011	50.3255	0.5537	8.5296	34.86	8.9197	8.8661	51	25.1	0	0	0	0	0	0	0	0
12:02:34	Light	1-10-after	3	244.67	8.9303	36.5	0.6583	80.33%	19.30%	4.7224	1.8962	43.4465	0.5533	8.5347	34.88	8.9293	8.8847	51	25.09988	0	0	0	0	0	0	0	0
12:04:32	Light	1-0-after	1	244.67	8.93598	36.52	0.6563	81.41%	19.51%	4.7747	1.72	370.9953	0.5577	8.5608	34.99	8.9555	8.8882	51	25.03	0	0	0	0	0	0	0	0
12:04:43	Light	1-0-after	2	244.67	8.94433	36.56	0.6563	81.22%	19.49%	4.7675	1.7249	996.6971	0.5574	8.5533	34.96	8.9468	8.8832	51	25.1	0	0	0	0	0	0	0	0
12:04:52	Light	1-0-after	3	244.67	8.95047	36.58	0.6563	81.16%	19.49%	4.7676	1.72	296.1551	0.5574	8.5532	34.96	8.9275	8.8863	51	25.09988	0	0	0	0	0	0	0	0
12:17:58	Light	1-2-10min	1	244.67	8.83708	36.12	0.6478	80.56%	18.85%	4.6119	1.7469	97.609	0.545	8.4615	34.58	8.8378	8.7444	51	25.03	0	0	0	0	0	0	0	0
12:18:40	Light	1-2-10min	2	244.67	8.84139	36.14	0.6477	80.54%	18.85%	4.6122	1.7372	348.269	0.5457	8.4523	34.55	8.8362	8.7489	51	24.99	0	0	0	0	0	0	0	0
12:18:53	Light	1-2-10min	3	244.67	8.82203	36.06	0.6476	80.77%	18.86%	4.6145	1.7298	41.1072	0.5459	8.4536	34.55	8.8359	8.7435	51	25.1	0	0	0	0	0	0	0	0
12:19:31	Light	1-0-10min	1	244.67	8.84454	36.15	0.6462	81.32%	19.00%	4.6478	1.6246	82.8961	0.5485	8.474	34.63	8.8414	8.7665	51	25.08	0	0	0	0	0	0	0	0
12:19:40	Light	1-0-10min	2	244.67	8.85218	36.18	0.6464	81.27%	19.01%	4.6503	1.6148	462.6987	0.549	8.4709	34.62	8.8541	8.7608	51	25.11505	0	0	0	0	0	0	0	0
12:21:45	Light	1-0-10min	3	244.67	8.84372	36.15	0.6463	81.31%	18.99%	4.6472	1.6246	53.0666	0.548	8.4798	34.66	8.8377	8.7493	51	25.08	0	0	0	0	0	0	0	0
12:22:21	Light	1-10-10min	1	244.67	8.9208	36.46	0.6575	80.48%	19.29%	4.7206	1.8326	47.1816	0.5541	8.5187	34.82	8.9094	8.853	51	25.07	0	0	0	0	0	0	0	0
12:22:30	Light	1-10-10min	2	244.67	8.91134	36.42	0.6575	80.62%	19.31%	4.7234	1.835	127.6756	0.5541	8.5243	34.84	8.9187	8.8521	51	25.13019	0	0	0	0	0	0	0	0
12:23:28	Light	1-10-10min	3	244.67	8.91305	36.43	0.6576	80.51%	19.29%	4.7187	1.8448	41.0898	0.5541	8.516	34.81	8.9104	8.8504	51	25.1	0	0	0	0	0	0	0	0
12:26:35	Light	1-5-10min	1	244.67	8.84384	36.15	0.6535	80.85%	19.10%	4.6724	1.7616	65.3421	0.5502	8.4922	34.71	8.8744	8.799	51	25.03	0	0	0	0	0	0	0	0
12:26:46	Light	1-5-10min	2	244.67	8.86758	36.24	0.6534	80.62%	19.09%	4.6714	1.7518	58.3856	0.5504	8.4879	34.69	8.8796	8.8002	51	25.09988	0	0	0	0	0	0	0	0
12:27:02	Light	1-5-10min	3	244.67	8.88053	36.3	0.6534	80.49%	19.09%	4.6706	1.7518	69.8152	0.5504	8.4858	34.68	8.8785	8.8102	51	25.1	0	0	0	0	0	0	0	0
12:29:54	Light	1-20-after	1	244.67	9.00374	36.8	0.665	80.66%	19.74%	4.8293	1.9231	74.12	0.5619	8.5948	35.13	9.0114	8.9654	51	25.03	0	0	0	0	0	0	0	0
12:30:04	Light	1-20-after	2	244.67	8.98873	36.74	0.6649	80.65%	19.70%	4.8201	1.9304	257.6032	0.5614	8.5852	35.09	9.0015	8.9474	51	25.1	0	0	0	0	0	0	0	0
12:30:14	Light	1-20-after	3	244.67	8.99407	36.76	0.6648	80.57%	19.69%	4.8173	1.9256	45.7556	0.5613	8.5821	35.08	8.9837	8.9413	51	25.09771	0	0	0	0	0	0	0	0
12:40:57	Light	1-10-20min	1	244.67	8.92502	36.48	0.6577	80.46%	19.30%	4.7228	1.8424	122.9555	0.5545	8.5173	34.81	8.9416	8.8533	51	25	0	0	0	0	0	0	0	0
12:41:08	Light	1-10-20min	2	244.67	8.92857	36.49	0.6577	80.44%	19.31%	4.7239	1.8301	113.4413	0.5546	8.5179	34.81	8.9034	8.86	51	25.1	0	0	0	0	0	0	0	0
12:41:23	Light	1-10-20min	3	244.67	8.91422	36.43	0.6576	80.55%	19.30%	4.7216	1.8326	65.9174	0.5545	8.515	34.8	8.9249	8.8577	51	25.1	0	0	0	0	0	0	0	0
12:42:41	Light	1-2-20min	1	244.67	8.83181	36.1	0.6472	80.52%	18.81%	4.6025	1.7274	190.6937	0.5454	8.439	34.49	8.83	8.7374	51	25.02	0	0	0	0	0	0	0	0
12:42:54	Light	1-2-20min	2	244.67	8.82251	36.06	0.6472	80.59%	18.81%	4.6014	1.7274	104.417	0.5455	8.4355	34.48	8.8315	8.7232	51	25.1	0	0	0	0	0	0	0	0
12:43:12	Light	1-2-20min	3	244.67	8.81904	36.04	0.6471	80.66%	18.81%	4.6029	1.7274	49.9902	0.5448	8.4491	34.53	8.8146	8.7278	51	25.1	0	0	0	0	0	0	0	0
12:43:49	Light	1-5-20min	1	244.67	8.88359	36.31	0.653	80.52%	19.09%	4.671	1.7469	82.2214	0.55	8.493	34.71	8.8864	8.793	51	25.06	0	0	0	0	0	0	0	0
12:43:58	Light	1-5-20min	2	244.67	8.88207	36.3	0.653	80.58%	19.10%	4.6737	1.7323	71.9783	0.5504	8.492	34.71	8.8746	8.8013	51	25.12587	0	0	0	0	0	0	0	0
12:44:32	Light	1-5-20min	3	244.67	8.87506	36.27	0.6531	80.59%	19.09%	4.6711	1.7372	530.2712	0.5502	8.4894	34.7	8.8813	8.8164	51	25.09	0	0	0	0	0	0	0	0
12:45:09	Light	1-20-10min	1	244.67	9.00353	36.8	0.6643	80.49%	19.67%	4.8138	1.9231	442.1933	0.5607	8.5849	35.09	8.9997	8.9511	51	25.06	0	0	0	0	0	0	0	0
12:45:18	Light	1-20-10min	2	244.67	8.99757	36.77	0.6644	80.56%	19.68%	4.8159	1.9182	101.7115	0.561	8.5845	35.09	8.9939	8.9514	51	25.13235	0	0	0	0	0	0	0	0
12:45:42	Light	1-20-10min	3	244.67	8.98106	36.71	0.6644	80.68%	19.68%	4.8142	1.9231	93.9992	0.5608	8.5848	35.09	8.9987	8.9564	51	25.12371	0	0	0	0	0	0	0	0
12:46:32	Light	1-0-20min	1	244.67	8.79902	35.96	0.6425	81.20%	18.76%	4.5904	1.5683	26.4786	0.5447	8.4272	34.44	8.787	8.7031	51	25.1	0	0	0	0	0	0	0	0
12:46:50	Light	1-0-20min	2	244.67	8.78565	35.91	0.6424	81.27%	18.75%	4.5868	1.5708	58.4653	0.5445	8.4242	34.43	8.7867	8.698	51	25.1	0	0	0	0	0	0	0	0
12:47:07	Light	1-0-20min	3	244.67	8.78837	35.92	0.6424	81.24%	18.75%	4.5867	1.5708	51.6069	0.5446	8.4223	34.42	8.808	8.7026	51	25.1	0	0	0	0	0	0	0	0
13:00:52	Light	1-10-30min	1	244.67	8.91239	36.43	0.6577	80.46%	19.28%	4.7165	1.8497	125.0328	0.5544	8.5071	34.77	8.9168	8.8405	51	25.03	0	0	0	0	0	0	0	0
13:01:02	Light	1-10-30min	2	244.67	8.91875	36.45	0.6576	80.43%	19.28%	4.717	1.8448	60.5348	0.5541	8.5125	34.79	8.91	8.8392	51	25.09988	0	0	0	0	0	0	0	0
13:01:22	Light	1-10-30min	3	244.67	8.9011	36.38	0.6577	80.54%	19.27%	4.7151	1.8424	318.7789	0.5543	8.5056	34.76	8.907	8.8482	51	25.09	0	0	0	0	0	0	0	0
13:02:05	Light	1-2-30min	1	244.67	8.82144	36.05	0.647	80.51%	18.78%	4.5953	1.7372	139.9203	0.5443	8.4421	34.5	8.8186	8.7327	51	25.04	0	0	0	0	0	0	0	0
13:02:13	Light	1-2-30min	2	244.67	8.82478	36.07	0.6469	80.54%	18.79%	4.598	1.7249	3558.1269	0.5454	8.4313	34.46	8.8243	8.7259	51	25.11288	0	0	0	0	0	0	0	0
13:02:47	Light	1-2-30min	3	244.67	8.81732	36.04	0.6469	80.48%	18.76%	4.5908	1.7372	123.6792	0.5449	8.4252	34.43	8.8121	8.7213	51	25.1	0	0	0	0	0	0	0	0
13:03:40	Light	1-5-30min	1	244.67	8.87579	36.28	0.6529	80.52%	19.07%	4.6659	1.7396	126.3641	0.5499	8.4848	34.68	8.8741	8.7922	51	25.07	0	0	0	0	0	0	0	0
13:03:58	Light	1-5-30min	2	244.67	8.87624	36.28	0.6529	80.55%	19.08%	4.668	1.7298	78.3325	0.5501	8.4851	34.68	8.8721	8.7908	51	25.1	0	0	0	0	0	0	0	0
13:04:17	Light	1-5-30min	3	244.67	8.86753	36.24	0.6529	80.57%	19.06%	4.6644	1.7225	97.6666	0.5508	8.4687	34.61	8.8731	8.805	51	25.09	0	0	0	0	0	0	0	0
13:05:18	Light	1-20-20min	1	244.67	8.98985	36.74	0.6644	80.65%	19.69%	4.8172	1.9182	720.9989	0.5609	8.5877	35.1	8.9989	8.9447	51	25.04	0	0	0	0	0	0	0	0
13:05:35	Light	1-20-20min	2	244.67	8.99511	36.76	0.6644	80.56%	19.68%	4.8147	1.9158	104.4231	0.561	8.582	35.08	8.9978	8.9512	51	25.1	0	0	0	0	0	0	0	0
13:05:53	Light	1-20-20min	3	244.67	9.00853	36.82	0.6644	80.46%	19.68%	4.8159	1.9084	102.1043	0.5611	8.5829	35.08	8.9963	8.9531	51	25.1	0	0	0	0	0	0	0	0
13:07:06	Light	1-0-30min	1	244.67	8.74723	35.75	0.6403	81.32%	18.62%	4.5548	1.5292	394.2223	0.544	8.3733	34.22	8.7512	8.658	51	25.06	0	0	0	0	0	0	0	0
13:07:23	Light	1-0-30min	2	244.67	8.75481	35.78	0.6403	81.24%	18.61%	4.5539	1.5414	209.6563	0.5427	8.3913	34.3	8.7415	8.6594	51	25.09	0	0	0	0	0	0	0	0
13:07:40	Light	1-0-30min	3	244.67	8.75368	35.78	0.6403	81.22%	18.61%	4.5522	1.539	128.8751	0.543	8.384	34.27	8.7472	8.6466	51	25.09	0	0	0	0	0	0	0	0
13:09:12	Light	1-30-after	1	244.67	9.02067	36.87	0.6656	80.92%	19.86%	4.8586	1.9011	37.4741	0.5643	8.6101	35.19	9.019	8.9738	51	25.05	0	0	0	0	0	0	0	0
13:09:26	Light	1-30-after	2	244.67	9.01167	36.83	0.6658	80.81%	19.82%	4.8487	1.9378	46.9814	0.5634	8.6056	35.17	9.0361	8.9731	51	25.1	0	0	0	0	0	0	0	0
13:09:41	Light	1-30-after	3	244.67	9.00517	36.81	0.6657	80.84%	19.81%	4.8463	1.9427	593.2153	0.5634	8.6022	35.16	9.0104	8.9675	51	25.09	0	0	0	0	0	0	0	0
13:23:46	Light	1-30-10min	1	244.67	9.02762	36.9	0.6659	80.82%	19.86%	4.8586	1.9182	43.6784	0.5648	8.6024	35.16	9.0352	8.976	51	25	0	0	0	0	0	0	0	0
13:23:56	Light	1-30-10min	2	244.67	9.0146	36.84	0.6659	80.84%	19.83%	4.8526	1.9402	88.7983	0.5638	8.6071	35.18	9.0215	8.975	51	25.09	0	0	0	0	0	0	0	0
13:24:12	Light	1-30-10min	3	244.67	9.02322	36.88	0.6659	80.79%	19.84%	4.8541	1.9378	179.0229	0.5639	8.6083	35.18	9.0197	8.9819	51	25.1	0	0	0	0	0	0	0	0
13:26:46	Light	1-20-30min	1	244.67	9.00595	36.81	0.6644	80.62%	19.72%	4.8241	1.9035	314.8458	0.5617	8.5891	35.1	9.0174	8.9557	51	25.09	0	0	0	0	0	0	0	0
13:27:10	Light	1-20-30min	2	244.67	9.00053	36.79	0.6644	80.67%	19.72%	4.824	1.906	72.6453	0.5614	8.5926	35.12	9.0063	8.9512	51	25.1	0	0	0	0	0	0	0	0
13:27:31	Light	1-20-30min	3	244.67	9.00415	36.8	0.6644	80.62%	19.71%	4.8231	1.9011	91.698	0.5616	8.5884	35.1	8.9933	8.9414	51	25.1	0	0	0	0	0	0	0	0
13:28:46	Light	1-10-40min	1	244.67	8.91268	36.43	0.6576	80.53%	19.29%	4.7199	1.8448	1317.408	0.5542	8.5163	34.81	8.9273	8.8607	51	25.07	0	0	0	0	0	0	0	0
13:29:05	Light	1-10-40min	2	244.67	8.92131	36.46	0.6576	80.46%	19.29%	4.7203	1.8399	30.5538	0.5541	8.5196	34.82	8.9171	8.8412	51	25.1	0	0	0	0	0	0	0	0
13:29:24	Light	1-10-40min	3	244.67	8.92146	36.46	0.6575	80.43%	19.28%	4.7181	1.835	71.605	0.5543	8.5116	34.79	8.9175	8.8519	51	25.1	0	0	0	0	0	0	0	0
13:30:14	Light	1-2-40min	1	244.67	8.82694	36.08	0.6467	80.42%	18.76%	4.5909	1.7176	80.9749	0.5452	8.4208	34.42	8.8234	8.7185	51	25.06	0	0	0	0	0	0	0	0
13:30:31	Light	1-2-40min	2	244.67	8.82121	36.05	0.6467	80.49%	18.77%	4.5915	1.7127	29.9996	0.5453	8.4201	34.41	8.8076	8.7197	51	25.1	0	0	0	0	0	0	0	0
13:30:50	Light	1-2-40min	3	244.67	8.81635	36.03	0.6466	80.54%	18.77%	4.5914	1.7078	74.4926	0.5453	8.4192	34.41	8.8225	8.7126	51	25.1	0	0	0	0	0	0	0	0
13:31:49	Light	1-5-40min	1	244.67	8.86824	36.25	0.6527	80.55%	19.06%	4.6623	1.7102	159.7896	0.5504	8.4713	34.62	8.8618	8.7919	51	25.06	0	0	0	0	0	0	0	0
13:32:06	Light	1-5-40min	2	244.67	8.86601	36.24	0.6527	80.57%	19.06%	4.6626	1.7053	1679.5332	0.5506	8.4678	34.61	8.8734	8.7871	51	25.09	0	0	0	0	0	0	0	0
13:32:23	Light	1-5-40min	3	244.67	8.86628	36.24	0.6527	80.56%	19.05%	4.6621	1.7029	226.4321	0.5506	8.4671	34.61	8.8725	8.795	51	25.09	0	0	0	0	0	0	0	0
13:33:12	Light	1-0-40min	1	244.67	8.72654	35.67	0.6388	81.35%	18.54%	4.535	1.6026	81.1134	0.5419	8.3684	34.2	8.7343	8.6246	51	25.02	0	0	0	0	0	0	0	0
13:33:27	Light	1-0-40min	2	244.67	8.72224	35.65	0.6387	81.29%	18.51%	4.5288	1.605	288.0571	0.5418	8.3588	34.16	8.7319	8.6203	51	25.1	0	0	0	0	0	0	0	0
13:33:44	Light	1-0-40min	3	244.67	8.73457	35.7	0.6387	81.22%	18.52%	4.5312	1.6026	83.8854	0.5418	8.3626	34.18	8.725	8.6236	51	25.1	0	0	0	0	0	0	0	0
13:47:33	Light	1-10-50min	1	244.67	8.9167	36.44	0.658	80.43%	19.29%	4.7191	1.8546	777.1444	0.5546	8.5093	34.78	8.9246	8.8566	51	25.01	0	0	0	0	0	0	0	0
13:47:42	Light	1-10-50min	2	244.67	8.91806	36.45	0.6578	80.54%	19.31%	4.7245	1.8399	46.3145	0.5546	8.5191	34.82	8.9174	8.8534	51	25.09	0	0	0	0	0	0	0	0
13:47:59	Light	1-10-50min	3	244.67	8.92076	36.46	0.6578	80.48%	19.30%	4.7228	1.8448	178.6808	0.5547	8.5136	34.8	8.9089	8.8544	51	25.09	0	0	0	0	0	0	0	0
13:49:21	Light	1-0-50min	1	244.67	8.71783	35.63	0.6379	81.27%	18.47%	4.5192	1.5952	45.7562	0.5412	8.3508	34.13	8.7097	8.607	51	25.06	0	0	0	0	0	0	0	0
13:49:37	Light	1-0-50min	2	244.67	8.71363	35.61	0.6379	81.22%	18.45%	4.5143	1.6001	32.131	0.5408	8.3478	34.12	8.7184	8.6167	51	25.1	0	0	0	0	0	0	0	0
13:49:54	Light	1-0-50min	3	244.67	8.71283	35.61	0.6378	81.25%	18.45%	4.515	1.6001	146.9956	0.5408	8.3486	34.12	8.7175	8.6195	51	25.09	0	0	0	0	0	0	0	0
13:51:25	Light	1-5-50min	1	244.67	8.87991	36.29	0.6528	80.36%	19.04%	4.6581	1.7347	131.1591	0.5499	8.4709	34.62	8.8635	8.793	51	25.06	0	0	0	0	0	0	0	0
13:51:40	Light	1-5-50min	2	244.67	8.87055	36.26	0.6528	80.52%	19.06%	4.6624	1.7249	891.9505	0.5501	8.4756	34.64	8.8717	8.7941	51	25.1	0	0	0	0	0	0	0	0
13:51:57	Light	1-5-50min	3	244.67	8.86786	36.24	0.6528	80.53%	19.05%	4.6617	1.7249	187.712	0.5501	8.474	34.63	8.8622	8.7936	51	25.09	0	0	0	0	0	0	0	0
13:53:40	Light	1-2-50min	1	244.67	8.81142	36.01	0.6465	80.50%	18.74%	4.5858	1.7127	253.4975	0.5447	8.4193	34.41	8.8122	8.7003	51	25.06	0	0	0	0	0	0	0	0
13:53:55	Light	1-2-50min	2	244.67	8.81334	36.02	0.6465	80.38%	18.72%	4.5801	1.7151	68.5682	0.5451	8.4028	34.34	8.8155	8.697	51	25.1	0	0	0	0	0	0	0	0
13:54:10	Light	1-2-50min	3	244.67	8.8182	36.04	0.6465	80.38%	18.73%	4.5822	1.7151	54.5844	0.5445	8.415	34.39	8.8072	8.6958	51	25.1	0	0	0	0	0	0	0	0
13:55:42	Light	1-30-20min	1	244.67	9.02167	36.87	0.6657	80.82%	19.84%	4.854	1.906	111.9936	0.5646	8.597	35.14	9.0221	8.9616	51	25.05	0	0	0	0	0	0	0	0
13:55:55	Light	1-30-20min	2	244.67	9.01799	36.86	0.6658	80.80%	19.83%	4.8512	1.9182	65.0476	0.5644	8.5955	35.13	9.0186	8.9747	51	25.1	0	0	0	0	0	0	0	0
13:56:10	Light	1-30-20min	3	244.67	9.03382	36.92	0.6658	80.75%	19.85%	4.8569	1.9011	266.9986	0.5651	8.5947	35.13	9.0361	8.9614	51	25.1	0	0	0	0	0	0	0	0
13:57:14	Light	1-20-40min	1	244.67	9.00623	36.81	0.6648	80.66%	19.74%	4.8294	1.9158	39.0686	0.5619	8.5952	35.13	8.9951	8.9628	51	25.04	0	0	0	0	0	0	0	0
13:57:28	Light	1-20-40min	2	244.67	9.00353	36.8	0.6649	80.67%	19.74%	4.8292	1.9133	92.6653	0.5622	8.5902	35.11	9.0044	8.9419	51	25.1	0	0	0	0	0	0	0	0
13:57:43	Light	1-20-40min	3	244.67	9.01041	36.83	0.6649	80.61%	19.74%	4.8294	1.9133	44.1639	0.5622	8.5896	35.11	8.9983	8.9497	51	25.1	0	0	0	0	0	0	0	0
14:12:10	Light	1-2-60min	1	244.67	8.81298	36.02	0.6466	80.47%	18.74%	4.5853	1.7225	111.0012	0.5443	8.4237	34.43	8.8117	8.7074	51	25.02	0	0	0	0	0	0	0	0
14:12:20	Light	1-2-60min	2	244.67	8.82074	36.05	0.6464	80.46%	18.75%	4.5877	1.7176	30.7217	0.5444	8.4274	34.44	8.8142	8.7211	51	25.09771	0	0	0	0	0	0	0	0
14:12:38	Light	1-2-60min	3	244.67	8.8129	36.02	0.6465	80.43%	18.73%	4.5828	1.7176	63.7827	0.5449	8.4096	34.37	8.7971	8.7134	51	25.09	0	0	0	0	0	0	0	0
14:13:39	Light	1-5-60min	1	244.67	8.87893	36.29	0.6528	80.42%	19.05%	4.6611	1.72	119.9719	0.5503	8.4705	34.62	8.8667	8.7935	51	25.05	0	0	0	0	0	0	0	0
14:13:54	Light	1-5-60min	2	244.67	8.87048	36.25	0.6528	80.48%	19.05%	4.6605	1.7176	118.5513	0.5502	8.4705	34.62	8.8774	8.8086	51	25.1	0	0	0	0	0	0	0	0
14:14:12	Light	1-5-60min	3	244.67	8.86879	36.25	0.6527	80.52%	19.05%	4.6609	1.7176	28.6214	0.5502	8.4713	34.62	8.8688	8.7918	51	25.1	0	0	0	0	0	0	0	0
14:15:19	Light	1-0-60min	1	244.67	8.71048	35.6	0.6374	81.28%	18.44%	4.5125	1.5855	70.2522	0.5408	8.3442	34.1	8.7267	8.5999	51	25.07	0	0	0	0	0	0	0	0
14:15:38	Light	1-0-60min	2	244.67	8.71529	35.62	0.6374	81.22%	18.44%	4.5118	1.5904	1090.4153	0.5406	8.3455	34.11	8.707	8.6139	51	25.09	0	0	0	0	0	0	0	0
14:15:55	Light	1-0-60min	3	244.67	8.69001	35.52	0.6373	81.43%	18.43%	4.5096	1.5904	34.9563	0.5405	8.3442	34.1	8.71	8.6062	51	25.1	0	0	0	0	0	0	0	0
14:17:29	Light	1-10-60min	1	244.67	8.92261	36.47	0.6579	80.50%	19.31%	4.7253	1.8619	367.2479	0.5541	8.5281	34.86	8.9174	8.8607	51	25.06	0	0	0	0	0	0	0	0
14:17:44	Light	1-10-60min	2	244.67	8.92131	36.46	0.6579	80.54%	19.32%	4.7272	1.8546	44.0426	0.5544	8.5268	34.85	8.9333	8.8533	51	25.09	0	0	0	0	0	0	0	0
14:18:00	Light	1-10-60min	3	244.67	8.92801	36.49	0.6579	80.46%	19.32%	4.7261	1.8546	163.1415	0.5542	8.5282	34.86	8.9288	8.8586	51	25.1	0	0	0	0	0	0	0	0
14:19:08	Light	1-20-50min	1	244.67	8.99889	36.78	0.6649	80.66%	19.73%	4.8265	1.9256	122.4025	0.562	8.5886	35.1	8.9988	8.9728	51	25.05	0	0	0	0	0	0	0	0
14:19:23	Light	1-20-50min	2	244.67	9.00197	36.79	0.665	80.70%	19.75%	4.831	1.9084	44.5475	0.5626	8.5866	35.09	8.9905	8.9408	51	25.1	0	0	0	0	0	0	0	0
14:19:39	Light	1-20-50min	3	244.67	8.99852	36.78	0.665	80.71%	19.74%	4.8294	1.9133	154.469	0.5625	8.5856	35.09	8.9985	8.961	51	25.1	0	0	0	0	0	0	0	0
14:20:54	Light	1-30-30min	1	244.67	9.03094	36.91	0.6658	80.70%	19.83%	4.8521	1.9182	586.7027	0.5644	8.5966	35.14	9.026	8.9627	51	25.04	0	0	0	0	0	0	0	0
14:21:09	Light	1-30-30min	2	244.67	9.0193	36.86	0.6659	80.75%	19.82%	4.8496	1.9231	58.6561	0.5643	8.5934	35.12	9.0192	8.9541	51	25.09	0	0	0	0	0	0	0	0
14:21:24	Light	1-30-30min	3	244.67	9.02023	36.87	0.6659	80.78%	19.83%	4.852	1.9231	82.2825	0.5645	8.5957	35.13	9.0224	8.9639	51	25.09	0	0	0	0	0	0	0	0
14:34:13	Light	1-30-40min	1	244.67	9.02555	36.89	0.6663	80.79%	19.86%	4.8583	1.9329	218.0693	0.5651	8.5979	35.14	9.0285	8.9743	51	25	0	0	0	0	0	0	0	0
14:34:26	Light	1-30-40min	2	244.67	9.01942	36.86	0.6664	80.80%	19.85%	4.8564	1.9353	287.8575	0.5648	8.5982	35.14	9.0281	8.9799	51	25.07	0	0	0	0	0	0	0	0
14:34:39	Light	1-30-40min	3	244.67	9.02411	36.88	0.6663	80.75%	19.84%	4.8554	1.9304	949.8392	0.5651	8.5914	35.11	9.0307	8.9724	51	25.09	0	0	0	0	0	0	0	0
14:35:30	Light	1-20-60min	1	244.67	9.00423	36.8	0.6653	80.73%	19.77%	4.8362	1.928	99.642	0.5626	8.5956	35.13	9.0031	8.9647	51	25.03	0	0	0	0	0	0	0	0
14:35:43	Light	1-20-60min	2	244.67	9.00296	36.8	0.6653	80.68%	19.75%	4.8327	1.928	371.8095	0.5627	8.5892	35.11	8.9948	8.9582	51	25.1	0	0	0	0	0	0	0	0
14:36:01	Light	1-20-60min	3	244.67	9.00573	36.81	0.6653	80.70%	19.76%	4.835	1.9231	780.4855	0.5629	8.59	35.11	9.006	8.9595	51	25.09	0	0	0	0	0	0	0	0
15:00:14	Light	1-0-1.5h	1	244.67	8.70135	35.56	0.6366	81.16%	18.38%	4.4959	1.5708	24.3936	0.5403	8.3209	34.01	8.6945	8.5849	51	25.05663	0	0	0	0	0	0	0	0
15:00:26	Light	1-0-1.5h	2	244.67	8.68199	35.48	0.6365	81.33%	18.37%	4.4941	1.5708	180.3141	0.5403	8.3174	33.99	8.6878	8.5748	51	25.05015	0	0	0	0	0	0	0	0
15:00:35	Light	1-0-1.5h	3	244.67	8.68711	35.51	0.6365	81.33%	18.38%	4.4969	1.5537	107.4532	0.5409	8.3132	33.98	8.6841	8.5724	51	25.08908	0	0	0	0	0	0	0	0
15:02:09	Light	1-10-1.5h	1	244.67	8.90914	36.41	0.6576	80.40%	19.25%	4.7102	1.8668	72.4702	0.5539	8.5037	34.76	8.9166	8.8343	51	25.08474	0	0	0	0	0	0	0	0
15:02:31	Light	1-10-1.5h	2	244.67	8.90995	36.42	0.6577	80.20%	19.21%	4.7001	1.8937	12835.3322	0.553	8.4995	34.74	8.9187	8.8379	51	25.08041	0	0	0	0	0	0	0	0
15:02:50	Light	1-10-1.5h	3	244.67	8.90064	36.38	0.6577	80.45%	19.25%	4.7097	1.8693	43.9657	0.5535	8.509	34.78	8.9019	8.8401	51	25.08041	0	0	0	0	0	0	0	0
15:04:14	Light	1-5-1.5h	1	244.67	8.86032	36.21	0.6525	80.49%	19.02%	4.6535	1.698	56.0109	0.5504	8.455	34.56	8.8542	8.7879	51	25.10205	0	0	0	0	0	0	0	0
15:04:48	Light	1-5-1.5h	2	244.67	8.85065	36.17	0.6525	80.57%	19.02%	4.6528	1.6882	152.8237	0.5507	8.4482	34.53	8.8574	8.773	51	25.08257	0	0	0	0	0	0	0	0
15:05:12	Light	1-5-1.5h	3	244.67	8.85626	36.2	0.6525	80.51%	19.02%	4.6525	1.6809	80.9609	0.5509	8.4452	34.52	8.8561	8.7592	51	25.09123	0	0	0	0	0	0	0	0
15:06:15	Light	1-2-1.5h	1	244.67	8.796	35.95	0.6461	80.41%	18.68%	4.5696	1.7127	168.6656	0.5447	8.3891	34.29	8.7924	8.6852	51	25.06527	0	0	0	0	0	0	0	0
15:06:34	Light	1-2-1.5h	2	244.67	8.78905	35.92	0.646	80.47%	18.67%	4.5688	1.7127	6224.4012	0.5447	8.388	34.28	8.7835	8.6803	51	25.07825	0	0	0	0	0	0	0	0
15:06:53	Light	1-2-1.5h	3	244.67	8.79667	35.95	0.6461	80.36%	18.67%	4.567	1.7127	60.8681	0.5446	8.3862	34.28	8.7943	8.6755	51	25.08257	0	0	0	0	0	0	0	0
15:07:55	Light	1-30-50min	1	244.67	9.0107	36.83	0.6663	80.70%	19.80%	4.8451	1.9549	61.441	0.5647	8.5793	35.06	9.0075	8.9571	51	25	0	0	0	0	0	0	0	0
15:08:04	Light	1-30-50min	2	244.67	9.00374	36.8	0.6663	80.72%	19.79%	4.8428	1.9574	2896.6138	0.5644	8.5806	35.07	9.0005	8.9534	51	25.06094	0	0	0	0	0	0	0	0
15:08:19	Light	1-30-50min	3	244.67	9.01174	36.83	0.6663	80.55%	19.77%	4.8364	1.9696	162.1797	0.5639	8.5765	35.05	9.0003	8.9404	51	25.07176	0	0	0	0	0	0	0	0
15:09:13	Light	1-20-1.5h	1	244.67	9.0052	36.81	0.6664	80.64%	19.78%	4.8395	1.9647	37.8151	0.564	8.5813	35.07	8.9871	8.9489	51	24.99	0	0	0	0	0	0	0	0
15:09:22	Light	1-20-1.5h	2	244.67	8.98574	36.73	0.6664	80.79%	19.77%	4.838	1.9549	46.3542	0.5645	8.5706	35.03	8.9898	8.948	51	990	0	0	0	0	0	0	0	0
15:09:37	Light	1-20-1.5h	3	244.67	8.99111	36.75	0.6664	80.74%	19.77%	4.8379	1.9549	72.2636	0.5644	8.5722	35.04	8.9892	8.9504	51	25.07177	0	0	0	0	0	0	0	0
15:21:37	Light	1-30-60min	1	244.67	9.01613	36.85	0.6671	80.77%	19.86%	4.858	1.9794	58.8705	0.5654	8.5925	35.12	9.0206	8.9754	51	24.9	0	0	0	0	0	0	0	0
15:21:46	Light	1-30-60min	2	244.67	9.02301	36.88	0.667	80.78%	19.87%	4.8618	1.9525	90.7714	0.5662	8.5871	35.1	9.0006	8.9502	51	24.99	0	0	0	0	0	0	0	0
15:21:52	Light	1-30-60min	3	244.67	9.01755	36.86	0.6669	80.98%	19.90%	4.87	1.9231	201.7401	0.5668	8.5916	35.12	9.0137	8.9778	51	24.99	0	0	0	0	0	0	0	0
15:47:20	Light	1-20	1	244.67	9.00154	36.79	0.6668	80.74%	19.81%	4.8464	1.9696	90.4684	0.5648	8.5801	35.07	9.0056	8.9545	51	25.06094	0	0	0	0	0	0	0	0
15:48:48	Light	1-20	2	244.67	8.9971	36.77	0.6662	80.74%	19.78%	4.8392	1.9549	390.674	0.5643	8.5761	35.05	8.9929	8.9477	51	25.21481	0	0	0	0	0	0	0	0
15:50:52	Light	1-20	3	244.67	8.9929	36.76	0.6663	80.81%	19.79%	4.8422	1.9549	482.6241	0.5642	8.5818	35.07	8.9911	8.9525	51	25.15838	0	0	0	0	0	0	0	0
15:52:10	Light	1-0-2H	1	244.67	8.67613	35.46	0.6356	81.09%	18.28%	4.4719	1.5708	151.1942	0.5393	8.2916	33.89	8.6673	8.5562	51	990	0	0	0	0	0	0	0	0
15:52:24	Light	1-0-2H	2	244.67	8.65856	35.39	0.6356	81.26%	18.28%	4.4718	1.5659	91.9883	0.5394	8.2906	33.88	8.6649	8.5459	51	990	0	0	0	0	0	0	0	0
15:52:35	Light	1-0-2H	3	244.67	8.66759	35.43	0.6355	81.13%	18.26%	4.4686	1.5634	59.1364	0.5395	8.2834	33.86	8.6598	8.5498	51	25.26049	0	0	0	0	0	0	0	0
15:54:22	Light	1-30-1.5h	1	244.67	9.02711	36.9	0.6671	80.78%	19.88%	4.8647	1.9451	656.6251	0.5667	8.585	35.09	9.0188	8.9684	51	25.05	0	0	0	0	0	0	0	0
15:54:34	Light	1-30-1.5h	2	244.67	9.02284	36.88	0.667	80.82%	19.88%	4.8642	1.9525	202.6534	0.5661	8.5921	35.12	9.0226	8.9597	51	25.10854	0	0	0	0	0	0	0	0
15:54:45	Light	1-30-1.5h	3	244.67	9.01856	36.86	0.667	80.92%	19.90%	4.8678	1.9378	30.6055	0.5665	8.5932	35.12	9.0182	8.9799	51	25.1714	0	0	0	0	0	0	0	0
15:55:57	Light	1-5-2h	1	244.67	8.86038	36.21	0.6529	80.28%	18.98%	4.6443	1.7396	165.3684	0.55	8.4439	34.51	8.8488	8.7623	51	25.05	0	0	0	0	0	0	0	0
15:56:09	Light	1-5-2h	2	244.67	8.84756	36.16	0.6528	80.47%	19.00%	4.6476	1.7249	130.7168	0.5503	8.4454	34.52	8.8589	8.7636	51	25.10854	0	0	0	0	0	0	0	0
15:56:28	Light	1-5-2h	3	244.67	8.85485	36.19	0.6528	80.38%	18.99%	4.6466	1.7176	150.9947	0.5504	8.442	34.5	8.8469	8.7799	51	25.14971	0	0	0	0	0	0	0	0
15:57:33	Light	1-2-2h	1	244.67	8.78891	35.92	0.6458	80.42%	18.66%	4.5646	1.7151	232.8235	0.5435	8.3981	34.32	8.7977	8.6845	51	25.07	0	0	0	0	0	0	0	0
15:57:52	Light	1-2-2h	2	244.67	8.79576	35.95	0.6458	80.37%	18.66%	4.5655	1.7102	572.4821	0.5439	8.3946	34.31	8.7983	8.673	51	25.08	0	0	0	0	0	0	0	0
15:58:11	Light	1-2-2h	3	244.67	8.7789	35.88	0.6457	80.54%	18.66%	4.5652	1.7078	200.4924	0.5438	8.3946	34.31	8.7857	8.673	51	25.07	0	0	0	0	0	0	0	0
15:59:10	Light	1-10-2h	1	244.67	8.8913	36.34	0.6575	80.59%	19.26%	4.7114	1.8326	82.5213	0.5545	8.4964	34.73	8.8978	8.825	51	25.08	0	0	0	0	0	0	0	0
15:59:34	Light	1-10-2h	2	244.67	8.88774	36.33	0.6576	80.56%	19.24%	4.7084	1.8375	43.9151	0.5548	8.486	34.68	8.891	8.8223	51	25.07	0	0	0	0	0	0	0	0
15:59:53	Light	1-10-2h	3	244.67	8.89844	36.37	0.6576	80.44%	19.24%	4.7068	1.8326	34.6612	0.5547	8.4853	34.68	8.895	8.8327	51	25.08	0	0	0	0	0	0	0	0
16:34:04	Light	1-20-2.5h	1	244.67	9.00704	36.81	0.6671	80.79%	19.84%	4.8541	1.9647	93.1408	0.5658	8.5789	35.06	9.0146	8.9501	51	25.09	0	0	0	0	0	0	0	0
16:34:19	Light	1-20-2.5h	2	244.67	9.0106	36.83	0.6671	80.59%	19.80%	4.8442	2.0063	47.7742	0.5641	8.5872	35.1	9.0088	8.9442	51	25.08	0	0	0	0	0	0	0	0
16:34:30	Light	1-20-2.5h	3	244.67	8.99338	36.76	0.667	80.80%	19.81%	4.8468	1.9916	250.5606	0.5645	8.586	35.09	9.0062	8.9535	51	25.09555	0	0	0	0	0	0	0	0
16:36:09	Light	1-2-2.5h	1	244.67	8.77382	35.86	0.6457	80.38%	18.61%	4.5538	1.7176	157.5931	0.5441	8.3702	34.21	8.7743	8.676	51	25	0	0	0	0	0	0	0	0
16:36:20	Light	1-2-2.5h	2	244.67	8.76777	35.84	0.6456	80.45%	18.61%	4.5538	1.7053	60.2418	0.5444	8.3654	34.19	8.7706	8.6581	51	25.08	0	0	0	0	0	0	0	0
16:36:36	Light	1-2-2.5h	3	244.67	8.76962	35.84	0.6455	80.32%	18.58%	4.547	1.7176	210.072	0.5438	8.3622	34.18	8.7601	8.657	51	25.08	0	0	0	0	0	0	0	0
16:37:28	Light	1-5-2.5h	1	244.67	8.83431	36.11	0.6529	80.46%	18.97%	4.6409	1.7494	82.0648	0.5497	8.4421	34.5	8.8298	8.7628	51	25.04	0	0	0	0	0	0	0	0
16:37:43	Light	1-5-2.5h	2	244.67	8.84569	36.15	0.6528	80.42%	18.98%	4.6435	1.7323	44.7912	0.5501	8.4409	34.5	8.8555	8.764	51	25.08	0	0	0	0	0	0	0	0
16:38:02	Light	1-5-2.5h	3	244.67	8.8582	36.2	0.6528	80.28%	18.97%	4.6421	1.7323	492.5958	0.55	8.4406	34.5	8.8392	8.7695	51	25.09	0	0	0	0	0	0	0	0
16:39:23	Light	1-0-2.5h	1	244.67	8.64284	35.32	0.6356	81.06%	18.20%	4.4532	1.5952	32.0952	0.5385	8.2703	33.8	8.6349	8.5245	51	25.06	0	0	0	0	0	0	0	0
16:39:41	Light	1-0-2.5h	2	244.67	8.64446	35.33	0.6355	81.02%	18.19%	4.4508	1.5904	130.6301	0.5384	8.2664	33.79	8.6546	8.5107	51	25.08	0	0	0	0	0	0	0	0
16:39:58	Light	1-0-2.5h	3	244.67	8.64398	35.33	0.6354	81.08%	18.20%	4.4533	1.583	360.0186	0.5385	8.2697	33.8	8.6342	8.5319	51	25.08	0	0	0	0	0	0	0	0
16:40:57	Light	1-30-2h	1	244.67	9.02359	36.88	0.6668	80.75%	19.86%	4.8589	1.9623	108.3553	0.5657	8.5893	35.11	9.0183	8.9619	51	25.07	0	0	0	0	0	0	0	0
16:41:22	Light	1-30-2h	2	244.67	9.00946	36.82	0.6669	80.82%	19.85%	4.8563	1.9623	75.8177	0.5661	8.5792	35.06	9.0226	8.9724	51	25.04	0	0	0	0	0	0	0	0
16:41:38	Light	1-30-2h	3	244.67	9.0264	36.89	0.6668	80.71%	19.85%	4.8579	1.9549	44.6113	0.5656	8.5893	35.11	9.0037	8.9602	51	25.08	0	0	0	0	0	0	0	0
16:42:49	Light	1-10-2.5h	1	244.67	8.9051	36.4	0.6584	80.45%	19.28%	4.7171	1.8815	115.5351	0.5545	8.5073	34.77	8.9006	8.8344	51	25.06	0	0	0	0	0	0	0	0
16:43:07	Light	1-10-2.5h	2	244.67	8.90945	36.41	0.6583	80.34%	19.26%	4.712	1.8766	51.6605	0.5548	8.4937	34.71	8.8995	8.8409	51	25.09	0	0	0	0	0	0	0	0
16:43:24	Light	1-10-2.5h	3	244.67	8.90115	36.38	0.6584	80.44%	19.27%	4.7144	1.8619	36.673	0.5552	8.492	34.71	8.9	8.8335	51	25.09	0	0	0	0	0	0	0	0
17:15:52	Light	1-20-3h	1	244.67	8.99001	36.74	0.6677	80.65%	19.79%	4.8413	2.0626	337.8589	0.5639	8.5847	35.09	8.9932	8.938	51	24.94	0	0	0	0	0	0	0	0
17:16:06	Light	1-20-3h	2	244.67	8.98987	36.74	0.6677	80.69%	19.80%	4.8436	2.043	54.5568	0.5642	8.5847	35.09	8.9878	8.9448	51	25.01	0	0	0	0	0	0	0	0
17:16:20	Light	1-20-3h	3	244.67	8.99811	36.78	0.6676	80.67%	19.81%	4.8457	2.0283	470.3989	0.5651	8.5756	35.05	8.9893	8.9331	51	25.04	0	0	0	0	0	0	0	0
17:18:15	Light	1-20-3h	4	244.67	8.83371	36.1	0.6528	80.34%	18.94%	4.6331	1.7445	103.1636	0.5497	8.4278	34.45	8.842	8.751	51	25.04	0	0	0	0	0	0	0	0
17:18:27	Light	1-5-3h	1	244.67	8.84538	36.15	0.6527	80.31%	18.95%	4.6366	1.7249	64.2117	0.55	8.4303	34.46	8.8447	8.7402	51	990	0	0	0	0	0	0	0	0
17:18:56	Light	1-5-3h	2	244.67	8.8424	36.14	0.6527	80.36%	18.96%	4.638	1.7225	76.1168	0.55	8.4329	34.47	8.8375	8.7452	51	25.09	0	0	0	0	0	0	0	0
17:19:20	Light	1-5-3h	3	244.67	8.84764	36.16	0.6526	80.32%	18.95%	4.6374	1.7176	125.0349	0.55	8.4313	34.46	8.8466	8.7582	51	25.1	0	0	0	0	0	0	0	0
17:23:21	Light	1-0-3h	1	244.67	8.6401	35.31	0.635	81.19%	18.20%	4.4542	1.5561	375.2672	0.5391	8.2627	33.77	8.6379	8.5201	51	25.03	0	0	0	0	0	0	0	0
17:23:33	Light	1-0-3h	2	244.67	8.64963	35.35	0.6348	81.26%	18.24%	4.462	1.5267	78.9618	0.5396	8.2696	33.8	8.6366	8.531	51	25.26702	0	0	0	0	0	0	0	0
17:25:36	Light	1-0-3h	3	244.67	8.66822	35.43	0.6348	81.18%	18.26%	4.4672	1.5194	67.8019	0.54	8.2729	33.81	8.6464	8.5331	51	25.09	0	0	0	0	0	0	0	0
17:27:26	Light	1-0-3h	4	244.67	8.65239	35.36	0.6351	81.26%	18.25%	4.4652	1.5414	88.0484	0.5397	8.2733	33.81	8.6482	8.5246	51	25.1	0	0	0	0	0	0	0	0
17:29:31	Light	1-10-3h	1	244.67	8.90048	36.38	0.6585	80.63%	19.31%	4.7255	1.8644	63.5578	0.5553	8.5104	34.78	8.9049	8.8349	51	25.09	0	0	0	0	0	0	0	0
17:29:48	Light	1-10-3h	2	244.67	8.90525	36.4	0.6585	80.46%	19.28%	4.718	1.8668	104.5877	0.5554	8.4947	34.72	8.9019	8.84	51	25.09	0	0	0	0	0	0	0	0
17:30:01	Light	1-10-3h	3	244.67	8.90369	36.39	0.6584	80.49%	19.29%	4.7188	1.8644	43.5933	0.5551	8.5011	34.75	8.9085	8.8379	51	25.1	0	0	0	0	0	0	0	0
17:31:47	Light	1-2-3h	1	244.67	8.77277	35.86	0.6455	80.51%	18.63%	4.559	1.7005	402.6699	0.5446	8.3714	34.22	8.7756	8.6717	51	24.97	0	0	0	0	0	0	0	0
17:31:58	Light	1-2-3h	2	244.67	8.7734	35.86	0.6454	80.57%	18.65%	4.5623	1.6956	48.0357	0.5441	8.3856	34.27	8.7677	8.6686	51	25.04	0	0	0	0	0	0	0	0
17:32:09	Light	1-2-3h	3	244.67	8.76607	35.83	0.6454	80.52%	18.62%	4.5558	1.6907	195.6541	0.5446	8.3652	34.19	8.7756	8.6608	51	25.08	0	0	0	0	0	0	0	0
17:33:10	Light	1-30-2.5h	1	244.67	9.02028	36.87	0.6671	80.82%	19.88%	4.8634	1.9696	55.0064	0.5662	8.5898	35.11	9.025	8.9604	51	24.97	0	0	0	0	0	0	0	0
17:33:24	Light	1-30-2.5h	2	244.67	9.01236	36.83	0.6671	80.95%	19.89%	4.8671	1.9476	847.5032	0.567	8.5841	35.08	9.0165	8.9764	51	25.02	0	0	0	0	0	0	0	0
17:33:35	Light	1-30-2.5h	3	244.67	9.02459	36.88	0.6671	80.77%	19.88%	4.8629	1.9427	40.7174	0.5668	8.5788	35.06	9.0144	8.9618	51	25.04	0	0	0	0	0	0	0	0
18:15:18	Light	1-30-3h	1	244.67	9.00434	36.8	0.6672	80.95%	19.88%	4.8634	1.9598	5203.6721	0.5665	8.5849	35.09	9.0123	8.9582	51	25.09	0	0	0	0	0	0	0	0
18:15:36	Light	1-30-3h	2	244.67	9.00513	36.81	0.6672	80.92%	19.87%	4.8619	1.9623	42.1572	0.5668	8.5781	35.06	9.0126	8.9475	51	25.1	0	0	0	0	0	0	0	0
18:15:52	Light	1-30-3h	3	244.67	9.00974	36.82	0.6672	80.82%	19.86%	4.8582	1.9598	95.4319	0.5668	8.5712	35.03	9.0067	8.9585	51	25.1	0	0	0	0	0	0	0	0
18:48:14	Light	1-10-4h	1	244.67	8.94489	36.56	0.6586	80.33%	19.34%	4.7321	1.8693	108.0508	0.5553	8.521	34.83	8.9289	8.867	51	25.05	0	0	0	0	0	0	0	0
18:48:32	Light	1-10-4h	2	244.67	8.92885	36.49	0.6586	80.51%	19.35%	4.7342	1.8619	614.003	0.5549	8.5309	34.87	8.9401	8.8686	51	25.1	0	0	0	0	0	0	0	0
18:48:50	Light	1-10-4h	3	244.67	8.93372	36.51	0.6585	80.43%	19.34%	4.7314	1.857	216.2597	0.5553	8.5207	34.83	8.9294	8.8673	51	25.1	0	0	0	0	0	0	0	0
18:49:41	Light	1-2-4h	1	244.67	8.77465	35.86	0.6446	80.66%	18.65%	4.5622	1.6809	97.4877	0.5431	8.3996	34.33	8.7842	8.6797	51	25.06	0	0	0	0	0	0	0	0
18:50:01	Light	1-2-4h	2	244.67	8.78587	35.91	0.6446	80.61%	18.66%	4.565	1.6662	176.8761	0.5437	8.3962	34.32	8.8008	8.6766	51	25.1	0	0	0	0	0	0	0	0
18:50:21	Light	1-2-4h	3	244.67	8.8055	35.99	0.6445	80.44%	18.66%	4.5654	1.6662	2377.0105	0.5435	8.3998	34.33	8.7955	8.6847	51	25.1	0	0	0	0	0	0	0	0
18:51:10	Light	1-20-4h	1	244.67	9.03837	36.94	0.6678	80.59%	19.88%	4.8645	2.0503	245.2293	0.5646	8.6152	35.21	9.0363	8.9803	51	25.07	0	0	0	0	0	0	0	0
18:51:31	Light	1-20-4h	2	244.67	9.042	36.96	0.6679	80.68%	19.91%	4.8725	2.0185	496.5507	0.5658	8.6117	35.2	9.029	8.9809	51	25.09	0	0	0	0	0	0	0	0
18:51:51	Light	1-20-4h	3	244.67	9.0386	36.94	0.6678	80.80%	19.93%	4.8768	2.0038	79.3773	0.5657	8.6203	35.23	9.0338	8.9938	51	25.1	0	0	0	0	0	0	0	0
18:52:51	Light	1-5-4h	1	244.67	8.87083	36.26	0.6523	80.39%	19.01%	4.6518	1.6833	96.7946	0.5503	8.4537	34.55	8.8715	8.7687	51	25.05	0	0	0	0	0	0	0	0
18:53:10	Light	1-5-4h	2	244.67	8.8699	36.25	0.6523	80.35%	19.00%	4.6489	1.6784	212.8913	0.5502	8.4494	34.53	8.8679	8.7745	51	25.1	0	0	0	0	0	0	0	0
18:53:27	Light	1-5-4h	3	244.67	8.86578	36.24	0.6523	80.37%	19.00%	4.6479	1.6809	264.8307	0.5502	8.448	34.53	8.8778	8.7767	51	25.1	0	0	0	0	0	0	0	0
18:54:10	Light	1-0-4h	1	244.67	8.66234	35.4	0.6345	81.02%	18.20%	4.4533	1.561	525.7512	0.5381	8.2755	33.82	8.6561	8.5428	51	25.05	0	0	0	0	0	0	0	0
18:54:28	Light	1-0-4h	2	244.67	8.6353	35.29	0.6344	81.31%	18.21%	4.4545	1.5537	196.7667	0.5383	8.2746	33.82	8.6495	8.5358	51	25.1	0	0	0	0	0	0	0	0
18:54:45	Light	1-0-4h	3	244.67	8.65419	35.37	0.6344	81.10%	18.20%	4.4527	1.5537	83.2436	0.5382	8.2738	33.82	8.657	8.5371	51	25.1	0	0	0	0	0	0	0	0
19:17:35	Light	1-30-4h	1	244.67	9.03858	36.94	0.6674	80.99%	19.97%	4.8856	1.9525	242.0332	0.5674	8.6113	35.2	9.0461	8.9856	51	25.03	0	0	0	0	0	0	0	0
19:17:51	Light	1-30-4h	2	244.67	9.05629	37.01	0.6673	80.86%	19.97%	4.8868	1.9427	53.2321	0.5675	8.6113	35.2	9.0545	8.9883	51	25.09	0	0	0	0	0	0	0	0
19:18:08	Light	1-30-4h	3	244.67	9.05752	37.02	0.6672	80.86%	19.97%	4.8866	1.9353	549.7817	0.5675	8.6104	35.19	9.0364	8.9938	51	25.09	0	0	0	0	0	0	0	0
19:50:56	Light	1-30-4h	4	244.67	8.9391	36.54	0.6583	80.37%	19.33%	4.7293	1.8815	225.4605	0.5539	8.5384	34.9	8.9554	8.8804	51	25.03	0	0	0	0	0	0	0	0
19:51:11	Light	1-10-4h	1	244.67	8.93802	36.53	0.6582	80.46%	19.35%	4.7335	1.8522	175.1487	0.555	8.5283	34.86	8.9293	8.8793	51	25.09	0	0	0	0	0	0	0	0
19:51:29	Light	1-10-4h	2	244.67	8.93139	36.5	0.6582	80.56%	19.36%	4.736	1.8424	488.8654	0.5549	8.5349	34.88	8.9341	8.8728	51	25.1	0	0	0	0	0	0	0	0
19:52:28	Light	1-2-5h	1	244.67	8.80858	36	0.6445	80.38%	18.65%	4.5633	1.6784	67.8308	0.543	8.4038	34.35	8.805	8.6827	51	25.07	0	0	0	0	0	0	0	0
19:52:47	Light	1-2-5h	2	244.67	8.79534	35.95	0.6445	80.56%	18.66%	4.5667	1.6662	870.8563	0.5434	8.4041	34.35	8.8099	8.6961	51	25.09	0	0	0	0	0	0	0	0
19:53:05	Light	1-2-5h	3	244.67	8.79333	35.94	0.6444	80.55%	18.65%	4.5641	1.6662	674.5036	0.5438	8.3924	34.3	8.7855	8.6877	51	25.1	0	0	0	0	0	0	0	0
19:54:07	Light	1-20-5h	1	244.67	9.03792	36.94	0.6674	80.77%	19.91%	4.872	1.9916	40.4862	0.5652	8.6199	35.23	9.0389	8.9846	51	25.06	0	0	0	0	0	0	0	0
19:54:30	Light	1-20-5h	2	244.67	9.03506	36.93	0.6674	80.81%	19.92%	4.8731	1.9867	317.7836	0.5654	8.6193	35.23	9.0157	8.9864	51	25.07	0	0	0	0	0	0	0	0
19:54:48	Light	1-20-5h	3	244.67	9.02982	36.91	0.6674	80.84%	19.91%	4.872	1.9843	64.7858	0.5655	8.6153	35.21	9.0318	8.9717	51	25.1	0	0	0	0	0	0	0	0
19:56:04	Light	1-5-5h	1	244.67	8.86974	36.25	0.652	80.19%	18.95%	4.6374	1.7274	34.7864	0.5487	8.4517	34.54	8.8631	8.7709	51	25.08	0	0	0	0	0	0	0	0
19:56:23	Light	1-5-5h	2	244.67	8.86577	36.24	0.652	80.32%	18.98%	4.6427	1.7029	39.6473	0.5494	8.4512	34.54	8.875	8.7636	51	25.09	0	0	0	0	0	0	0	0
19:56:41	Light	1-5-5h	3	244.67	8.86647	36.24	0.6519	80.30%	18.97%	4.6416	1.7053	44.5157	0.5492	8.4512	34.54	8.866	8.7594	51	25.1	0	0	0	0	0	0	0	0
19:57:37	Light	1-0-5h	1	244.67	8.6582	35.39	0.6342	81.05%	18.19%	4.4506	1.5561	62.1844	0.5379	8.2735	33.81	8.6478	8.5279	51	25.07	0	0	0	0	0	0	0	0
19:57:54	Light	1-0-5h	2	244.67	8.65597	35.38	0.6342	81.11%	18.20%	4.4528	1.5439	34.3816	0.5384	8.2706	33.8	8.6478	8.5172	51	25.1	0	0	0	0	0	0	0	0
19:58:11	Light	1-0-5h	3	244.67	8.64394	35.33	0.6342	81.21%	18.20%	4.4519	1.5414	82.6957	0.5385	8.2672	33.79	8.6474	8.531	51	25.1	0	0	0	0	0	0	0	0
20:20:41	Light	1-0-5h	4	244.67	8.92614	36.48	0.6662	75.95%	18.46%	4.5163	2.5813	134.9673	0.5372	8.407	34.36	8.9232	8.7644	51	25.03	0	0	0	0	0	0	0	0
20:21:33	Light	1-0-5h	5	244.67	8.92098	36.46	0.6657	76.27%	18.51%	4.5297	2.503	253.4611	0.5392	8.4004	34.33	8.929	8.7624	51	25.03	0	0	0	0	0	0	0	0
20:23:36	Light	1-0-5h	6	244.67	9.03983	36.95	0.6672	80.70%	19.89%	4.8675	1.9769	69.0951	0.5661	8.5986	35.14	9.033	8.9564	51	25.04	0	0	0	0	0	0	0	0
20:23:51	Light	1-0-5h	7	244.67	9.03467	36.93	0.6672	80.78%	19.90%	4.8691	1.972	131.2687	0.5663	8.5985	35.14	9.0288	8.9699	51	25.1	0	0	0	0	0	0	0	0
20:24:10	Light	1-30-5h	1	244.67	9.02654	36.89	0.6671	80.79%	19.88%	4.8649	1.9696	63.2728	0.5664	8.589	35.1	9.0361	8.9606	51	25.09	0	0	0	0	0	0	0	0
20:51:37	Light	1-10-6h	1	244.67	8.92969	36.5	0.658	80.36%	19.30%	4.7217	1.8668	146.1295	0.5541	8.5207	34.83	8.937	8.8614	51	25.02	0	0	0	0	0	0	0	0
20:52:01	Light	1-10-6h	2	244.67	8.91735	36.45	0.6579	80.54%	19.31%	4.7252	1.8424	178.1761	0.5545	8.5209	34.83	8.9337	8.8531	51	25.05	0	0	0	0	0	0	0	0
20:52:17	Light	1-10-6h	3	244.67	8.93004	36.5	0.6578	80.45%	19.31%	4.7258	1.8399	67.111	0.5544	8.5242	34.84	8.9423	8.847	51	25.1	0	0	0	0	0	0	0	0
20:54:35	Light	1-10-6h	4	244.67	8.8067	35.99	0.6444	80.39%	18.65%	4.5622	1.6931	387.3013	0.5425	8.4102	34.37	8.8106	8.6966	51	25.06	0	0	0	0	0	0	0	0
20:55:00	Light	1-2-6h	1	244.67	8.80851	36	0.6444	80.46%	18.67%	4.5669	1.6662	110.0204	0.5438	8.3983	34.33	8.7956	8.6926	51	25.06	0	0	0	0	0	0	0	0
20:55:21	Light	1-2-6h	2	244.67	8.79701	35.95	0.6444	80.58%	18.67%	4.568	1.6638	797.1404	0.5433	8.4071	34.36	8.7957	8.6948	51	25.1	0	0	0	0	0	0	0	0
20:57:45	Light	1-2-6h	3	244.67	9.0064	36.81	0.6671	80.53%	19.77%	4.8383	2.0479	30.7389	0.5628	8.5964	35.13	9.0022	8.9585	51	25.04	0	0	0	0	0	0	0	0
20:58:55	Light	1-20-6h	1	244.67	9.01953	36.86	0.6672	80.65%	19.84%	4.8535	2.0038	58.6834	0.5645	8.598	35.14	9.0122	8.9706	51	25.05	0	0	0	0	0	0	0	0
20:59:12	Light	1-20-6h	2	244.67	9.03252	36.92	0.6671	80.51%	19.83%	4.8515	2.0063	210.2083	0.5644	8.5959	35.13	9.0097	8.9588	51	25.1	0	0	0	0	0	0	0	0
20:59:31	Light	1-20-6h	3	244.67	9.02572	36.89	0.6671	80.59%	19.83%	4.8521	2.0014	330.3188	0.5645	8.5955	35.13	9.0212	8.9694	51	25.1	0	0	0	0	0	0	0	0
21:01:46	Light	1-5-6h	1	244.67	8.83759	36.12	0.652	80.04%	18.85%	4.6118	1.7763	34.5742	0.5475	8.424	34.43	8.8408	8.7425	51	25.06	0	0	0	0	0	0	0	0
21:02:07	Light	1-5-6h	2	244.67	8.84422	36.15	0.6519	80.19%	18.90%	4.6232	1.7372	93.793	0.5484	8.4299	34.45	8.8412	8.7454	51	25.07	0	0	0	0	0	0	0	0
21:02:19	Light	1-5-6h	3	244.67	8.83221	36.1	0.6518	80.37%	18.91%	4.627	1.7151	306.6928	0.549	8.4286	34.45	8.8391	8.732	51	25.10421	0	0	0	0	0	0	0	0
21:04:22	Light	1-5-6h	4	244.67	8.64225	35.32	0.6342	81.08%	18.16%	4.444	1.5634	1835.5186	0.5377	8.2653	33.78	8.6457	8.523	51	25.04	0	0	0	0	0	0	0	0
21:04:37	Light	1-5-6h	5	244.67	8.63395	35.29	0.6341	81.22%	18.17%	4.4465	1.5512	26.1287	0.538	8.2644	33.78	8.6323	8.5211	51	25.1	0	0	0	0	0	0	0	0
21:04:52	Light	1-5-6h	6	244.67	8.64885	35.35	0.6341	81.06%	18.17%	4.4454	1.5488	130.1343	0.5381	8.2607	33.76	8.6327	8.5131	51	25.1	0	0	0	0	0	0	0	0
21:27:04	Light	1-30-6h	1	244.67	9.06616	37.05	0.6674	80.76%	19.97%	4.8868	1.972	61.908	0.5667	8.623	35.24	9.0636	8.9967	51	25.02	0	0	0	0	0	0	0	0
21:27:19	Light	1-30-6h	2	244.67	9.07287	37.08	0.6673	80.81%	20.00%	4.8926	1.9402	56.879	0.5675	8.621	35.24	9.0495	9.0126	51	25.1	0	0	0	0	0	0	0	0
21:27:36	Light	1-30-6h	3	244.67	9.06166	37.04	0.6673	80.89%	19.99%	4.8912	1.9378	57.3779	0.5676	8.6178	35.22	9.0568	9.012	51	25.1	0	0	0	0	0	0	0	0
21:57:23	Light	1-10-7h	1	244.67	8.93582	36.52	0.6581	80.45%	19.34%	4.7311	1.8668	200.53	0.5541	8.5379	34.9	8.9351	8.8694	51	25	0	0	0	0	0	0	0	0
21:57:35	Light	1-10-7h	2	244.67	8.94871	36.57	0.6579	80.43%	19.35%	4.7353	1.8424	45.7481	0.5545	8.5391	34.9	8.9419	8.8709	51	25.08	0	0	0	0	0	0	0	0
21:57:46	Light	1-10-7h	3	244.67	8.94207	36.55	0.658	80.42%	19.34%	4.7318	1.8375	280.2674	0.5549	8.5269	34.85	8.9494	8.8665	51	25.10854	0	0	0	0	0	0	0	0
21:59:57	Light	1-10-7h	4	244.67	8.81074	36.01	0.6444	80.17%	18.60%	4.5517	1.7298	960.3038	0.5412	8.4097	34.37	8.8313	8.6932	51	25.04	0	0	0	0	0	0	0	0
22:00:15	Light	1-10-7h	5	244.67	8.8057	35.99	0.6444	80.46%	18.66%	4.5657	1.6858	1278.9138	0.5427	8.4123	34.38	8.8036	8.6811	51	25.1	0	0	0	0	0	0	0	0
22:00:34	Light	1-10-7h	6	244.67	8.8051	35.99	0.6444	80.47%	18.66%	4.5656	1.6858	55.9876	0.5426	8.414	34.39	8.8033	8.7067	51	25.1	0	0	0	0	0	0	0	0
22:01:59	Light	1-20-7h	1	244.67	9.01309	36.84	0.6671	80.76%	19.85%	4.8558	2.0014	235.6507	0.5647	8.5995	35.15	9.028	8.9722	51	25.06	0	0	0	0	0	0	0	0
22:02:16	Light	1-20-7h	2	244.67	9.0194	36.86	0.6671	80.74%	19.86%	4.8582	1.9892	71.8924	0.5648	8.6022	35.16	9.0302	8.9756	51	25.1	0	0	0	0	0	0	0	0
22:02:36	Light	1-20-7h	3	244.67	9.0177	36.86	0.667	80.78%	19.86%	4.8588	1.9867	55.5035	0.5649	8.6019	35.16	9.027	8.9746	51	25.1	0	0	0	0	0	0	0	0
22:04:00	Light	1-5-7h	1	244.67	8.85704	36.2	0.652	80.16%	18.92%	4.6293	1.7567	69.6688	0.5481	8.446	34.52	8.8523	8.7558	51	25.05	0	0	0	0	0	0	0	0
22:04:17	Light	1-5-7h	2	244.67	8.86963	36.25	0.652	80.02%	18.91%	4.6274	1.7616	324.7037	0.5479	8.4457	34.52	8.8664	8.7633	51	25.1	0	0	0	0	0	0	0	0
22:04:36	Light	1-5-7h	3	244.67	8.85871	36.21	0.652	80.14%	18.92%	4.6288	1.7543	70.6084	0.5481	8.4445	34.51	8.8562	8.7581	51	25.09	0	0	0	0	0	0	0	0
22:05:47	Light	1-0-7h	1	244.67	8.64899	35.35	0.6338	81.02%	18.15%	4.4416	1.5512	268.4464	0.5376	8.2618	33.77	8.6419	8.5154	51	25.06	0	0	0	0	0	0	0	0
22:06:05	Light	1-0-7h	2	244.67	8.63579	35.3	0.6338	81.12%	18.15%	4.4403	1.5488	54.1126	0.5377	8.2576	33.75	8.6526	8.5108	51	25.1	0	0	0	0	0	0	0	0
22:06:24	Light	1-0-7h	3	244.67	8.63828	35.31	0.6338	81.12%	18.15%	4.4414	1.5439	43.1633	0.5378	8.2592	33.76	8.6414	8.5147	51	25.09	0	0	0	0	0	0	0	0
22:32:49	Light	1-30-7h	1	244.67	9.06042	37.03	0.6671	80.81%	19.96%	4.8845	1.928	44.0651	0.5675	8.6075	35.18	9.0652	8.9957	51	25.02	0	0	0	0	0	0	0	0
22:32:59	Light	1-30-7h	2	244.67	9.05287	37	0.6671	80.79%	19.94%	4.8789	1.9329	366.696	0.5672	8.6023	35.16	9.0661	8.9931	51	25.1	0	0	0	0	0	0	0	0
22:33:18	Light	1-30-7h	3	244.67	9.05768	37.02	0.6671	80.79%	19.95%	4.8819	1.928	155.1045	0.5674	8.6033	35.16	9.0563	8.9858	51	25.09	0	0	0	0	0	0	0	0
22:57:00	Light	1-10-8h	1	244.67	8.92339	36.47	0.6581	80.40%	19.30%	4.7216	1.8619	37.6547	0.5547	8.5112	34.79	8.9234	8.8413	51	25.01	0	0	0	0	0	0	0	0
22:57:11	Light	1-10-8h	2	244.67	8.91783	36.45	0.658	80.52%	19.31%	4.7246	1.8326	395.4934	0.5548	8.516	34.81	8.923	8.846	51	25.1	0	0	0	0	0	0	0	0
22:57:28	Light	1-10-8h	3	244.67	8.92457	36.48	0.658	80.48%	19.32%	4.7261	1.8252	73.4695	0.5552	8.5123	34.79	8.9201	8.8532	51	25.1	0	0	0	0	0	0	0	0
22:58:47	Light	1-2-8h	1	244.67	8.77199	35.85	0.6445	80.66%	18.64%	4.5603	1.6613	180.6156	0.5442	8.3804	34.25	8.7838	8.6763	51	25.05	0	0	0	0	0	0	0	0
22:59:04	Light	1-2-8h	2	244.67	8.80983	36.01	0.6444	80.37%	18.65%	4.5629	1.6515	125.945	0.5444	8.3815	34.26	8.7918	8.6727	51	25.1	0	0	0	0	0	0	0	0
22:59:23	Light	1-2-8h	3	244.67	8.79287	35.94	0.6444	80.47%	18.64%	4.5596	1.6589	153.1713	0.5442	8.379	34.25	8.7726	8.6724	51	25.1	0	0	0	0	0	0	0	0
23:00:26	Light	1-5-8h	1	244.67	8.85872	36.21	0.652	80.15%	18.92%	4.6296	1.7298	200.0601	0.5488	8.4364	34.48	8.8535	8.7614	51	25.06	0	0	0	0	0	0	0	0
23:00:46	Light	1-5-8h	2	244.67	8.84904	36.17	0.652	80.24%	18.92%	4.6296	1.7298	89.2199	0.5489	8.4348	34.47	8.8572	8.7654	51	25.1	0	0	0	0	0	0	0	0
23:01:05	Light	1-5-8h	3	244.67	8.85064	36.17	0.652	80.24%	18.92%	4.6304	1.7274	187.0195	0.5488	8.4376	34.49	8.853	8.7463	51	25.1	0	0	0	0	0	0	0	0
23:04:20	Light	1-0-8h	1	244.67	8.62633	35.26	0.6336	80.83%	18.06%	4.4181	1.5561	10644.2799	0.5372	8.2243	33.61	8.6209	8.4789	51	25.03	0	0	0	0	0	0	0	0
23:04:34	Light	1-0-8h	2	244.67	8.63163	35.28	0.6336	80.76%	18.05%	4.4166	1.5585	96.7514	0.5362	8.237	33.67	8.6229	8.4762	51	25.1	0	0	0	0	0	0	0	0
23:04:51	Light	1-0-8h	3	244.67	8.61923	35.23	0.6335	80.85%	18.04%	4.4147	1.5512	153.0365	0.5371	8.2191	33.59	8.6238	8.4756	51	25.1	0	0	0	0	0	0	0	0
23:11:56	Light	1-0-8h	4	244.67	9.09425	37.17	0.6677	81.34%	20.19%	4.939	1.9084	41.018	0.5691	8.6784	35.47	9.0862	9.0495	51	24.99	0	0	0	0	0	0	0	0
23:12:09	Light	1-0-8h	5	244.67	9.07898	37.11	0.6679	81.34%	20.16%	4.9323	1.9329	64.6044	0.5688	8.6712	35.44	9.0667	9.0314	51	25.06	0	0	0	0	0	0	0	0
23:12:27	Light	1-0-8h	6	244.67	9.07188	37.08	0.668	81.33%	20.15%	4.9289	1.9353	52.594	0.5686	8.6679	35.43	9.0794	9.0391	51	25.06	0	0	0	0	0	0	0	0
23:34:49	Light	1-0-8h	7	244.67	9.06085	37.03	0.6669	80.50%	19.88%	4.8646	1.9402	959.4223	0.5668	8.5832	35.08	9.0519	8.974	51	25.03	0	0	0	0	0	0	0	0
23:35:04	Light	1-30-8h	1	244.67	9.04873	36.98	0.667	80.63%	19.89%	4.8667	1.9304	130.4714	0.5669	8.5849	35.09	9.05	8.9873	51	25.09	0	0	0	0	0	0	0	0
23:35:28	Light	1-30-8h	2	244.67	9.0561	37.01	0.6669	80.64%	19.91%	4.8704	1.9231	218.482	0.567	8.5905	35.11	9.0453	8.9811	51	25.06	0	0	0	0	0	0	0	0
23:49:47	Light	1-20-2-after	1	244.67	9.11577	37.26	0.6705	81.63%	20.39%	4.9893	1.8742	366.0207	0.573	8.7074	35.59	9.1032	9.0714	51	25.02	0	0	0	0	0	0	0	0
23:49:58	Light	1-20-2-after	2	244.67	9.0935	37.17	0.6707	81.68%	20.36%	4.9817	1.9011	670.3415	0.5726	8.7007	35.56	9.0948	9.0712	51	25.1	0	0	0	0	0	0	0	0
23:50:21	Light	1-20-2-after	3	244.67	9.09545	37.17	0.6707	81.68%	20.37%	4.9829	1.8986	119.0941	0.5727	8.7013	35.56	9.1054	9.0639	51	25.06	0	0	0	0	0	0	0	0
23:52:12	Light	1-10-9h	1	244.67	8.95268	36.59	0.6581	80.20%	19.31%	4.7253	1.857	66.3221	0.5542	8.5268	34.85	8.9462	8.8641	51	25.06	0	0	0	0	0	0	0	0
23:52:33	Light	1-10-9h	2	244.67	8.93481	36.52	0.658	80.38%	19.31%	4.7255	1.835	201.0249	0.5551	8.5136	34.8	8.9318	8.8557	51	25.08	0	0	0	0	0	0	0	0
23:52:53	Light	1-10-9h	3	244.67	8.93678	36.53	0.658	80.36%	19.31%	4.7255	1.8326	2294.7633	0.5551	8.5122	34.79	8.934	8.8546	51	25.1	0	0	0	0	0	0	0	0
23:55:21	Light	1-2-9h	1	244.67	8.78503	35.91	0.6443	80.41%	18.60%	4.5513	1.6686	333.9177	0.5432	8.379	34.25	8.7819	8.6695	51	25.1	0	0	0	0	0	0	0	0
23:55:46	Light	1-2-9h	2	244.67	8.77855	35.88	0.6444	80.52%	18.62%	4.5548	1.6613	297.21	0.5434	8.3814	34.26	8.7868	8.6667	51	25.09	0	0	0	0	0	0	0	0
23:56:10	Light	1-2-9h	3	244.67	8.78344	35.9	0.6443	80.51%	18.62%	4.5562	1.654	84.9838	0.5438	8.379	34.25	8.7788	8.6696	51	25.1	0	0	0	0	0	0	0	0
23:58:56	Light	1-5-9h	1	244.67	8.85214	36.18	0.6522	80.12%	18.91%	4.6258	1.7445	61.57	0.5486	8.4324	34.46	8.854	8.7475	51	25.06	0	0	0	0	0	0	0	0
23:59:14	Light	1-5-9h	2	244.67	8.85418	36.19	0.6522	80.06%	18.90%	4.6233	1.7518	56.2103	0.5485	8.4296	34.45	8.8496	8.7492	51	25.09	0	0	0	0	0	0	0	0
23:59:33	Light	1-5-9h	3	244.67	8.85309	36.18	0.6521	80.07%	18.89%	4.6227	1.7543	638.0489	0.5483	8.4316	34.46	8.8566	8.7582	51	25.08	0	0	0	0	0	0	0	0
