# Supplementary material for: Study on the Electrical Injection Regeneration of Industrialized B-Doped Czochralski Silicon PERC Solar Cells
Source: Hindawi journal article supplement (doi:10.1155/2019/5357370), 2019-06-20
Supplement: f1 [file 5357370.f1.zip › section3.2/IVRawData.csv]

11:12 02/04/2018
Test Lot:	JK-PERC
Recipe:	Recipe_YJX-LID
Cell Name:
Test Order:	1
Test Condition:	Light
1	-0.29987735	9.10403540	-2.73009401		1.00000000	34.34000000	312.63257564	0.000000
2	-0.29005995	9.09074500	-2.63686104		2.00000000	17.17000000	156.08809165	0.061795
3	-0.27994335	9.07453160	-2.54035478		3.00000000	11.44666667	103.87313838	0.083220
4	-0.27009991	9.09568980	-2.45674500		4.00000000	8.58500000	78.08649693	0.104589
5	-0.25995129	9.10512540	-2.36688909		5.00000000	6.86800000	62.53400125	0.126071
6	-0.24980791	9.08045480	-2.26836944		6.00000000	5.72333333	51.97046964	0.147475
7	-0.23998530	9.11245540	-2.18685534		7.00000000	4.90571429	44.70310263	0.168862
8	-0.22983669	9.09889030	-2.09125883		8.00000000	4.29250000	39.05698661	0.190383
9	-0.21998952	9.09859850	-2.00159632		9.00000000	3.81555556	34.71620805	0.211791
10	-0.20986548	9.09732340	-1.90921414		10.00000000	3.43400000	31.24020856	0.233143
11	-0.20006445	9.10217860	-1.82102236		11.00000000	3.12181818	28.41534665	0.254522
12	-0.18989724	9.09829810	-1.72774170		12.00000000	2.86166667	26.03629640	0.276020
13	-0.18006720	9.09972480	-1.63856197		13.00000000	2.64153846	24.03727305	0.297388
14	-0.16995803	9.10206790	-1.54696953		14.00000000	2.45285714	22.32607226	0.318738
15	-0.16012202	9.09923270	-1.45698752		15.00000000	2.28933333	20.83117673	0.340120
16	-0.14994588	9.09046940	-1.36307843		16.00000000	2.14625000	19.51041995	0.361597
17	-0.13981588	9.09649750	-1.27183480		17.00000000	2.02000000	18.37492495	0.382972
18	-0.12999402	9.10773090	-1.18395055		18.00000000	1.90777778	17.37552662	0.404323
19	-0.11984690	9.09504890	-1.09001342		19.00000000	1.80736842	16.43810417	0.425704
20	-0.11005630	9.09872340	-1.00137183		20.00000000	1.71700000	15.62250808	0.447183
21	-0.09987419	9.08765600	-0.90762229		21.00000000	1.63523810	14.86048129	0.468559
22	-0.09005978	9.11246490	-0.82066658		22.00000000	1.56090909	14.22372930	0.489892
23	-0.07991564	9.07954880	-0.72559791		23.00000000	1.49304348	13.55616112	0.511271
24	-0.07010717	9.10359190	-0.63822706		24.00000000	1.43083333	13.02572274	0.532765
25	-0.05999503	9.06738760	-0.54399822		25.00000000	1.37360000	12.45496361	0.554132
26	-0.04980251	9.11211490	-0.45380618		26.00000000	1.32076923	12.03500099	0.575491
27	-0.03999851	9.09559440	-0.36381025		27.00000000	1.27185185	11.56824858	0.596865
28	-0.02981567	9.08688160	-0.27093142		28.00000000	1.22642857	11.14441122	0.618332
29	-0.02005930	9.09422590	-0.18242382		29.00000000	1.18413793	10.76881784	0.639734
30	-0.00990251	9.09115890	-0.09002526		30.00000000	1.14466667	10.40634655	0.661093
31	-0.00066567	9.09216500	-0.00605239		31.00000000	1.10774194	10.07177245	0.682570
32	0.00948645	9.09938140	0.08632086		32.00000000	1.07312500	9.76477366	0.704067
33	0.01931845	9.09899040	0.17577841		33.00000000	1.04060606	9.46846456	0.725452
34	0.02944966	9.09267710	0.26777620		34.00000000	1.01000000	9.18360387	0.746850
35	0.03927719	9.09252360	0.35712876		35.00000000	0.98114286	8.92106458	0.768204
36	0.04944561	9.09585860	0.44975025		36.00000000	0.95388889	8.67643845	0.789674
37	0.05923816	9.09400080	0.53871186		37.00000000	0.92810811	8.44021588	0.811065
38	0.06937755	9.09147740	0.63074442		38.00000000	0.90368421	8.21582458	0.832450
39	0.07952885	9.09453490	0.72327787		39.00000000	0.88051282	8.00785458	0.853930
40	0.08935787	9.09587480	0.81278798		40.00000000	0.85850000	7.80880852	0.875313
41	0.09949726	9.08495430	0.90392805		41.00000000	0.83756098	7.60920319	0.896657
42	0.10930246	9.08905790	0.99345639		42.00000000	0.81761905	7.43138686	0.918019
43	0.11945004	9.09093670	1.08591275		43.00000000	0.79860465	7.26006433	0.939501
44	0.12929469	9.08262730	1.17433548		44.00000000	0.78045455	7.08857776	0.960876
45	0.13943928	9.09635930	1.26838979		45.00000000	0.76311111	6.94153285	0.982220
46	0.14927278	9.08465390	1.35609154		46.00000000	0.74652174	6.78189163	1.003600
47	0.15940323	9.09172250	1.44924993		47.00000000	0.73063830	6.64276065	1.025071
48	0.16956644	9.08800980	1.54102147		48.00000000	0.71541667	6.50171368	1.046455
49	0.17939100	9.08605190	1.62995594		49.00000000	0.70081633	6.36765352	1.067810
50	0.18952072	9.09431270	1.72356069		50.00000000	0.68680000	6.24597396	1.089174
51	0.19928946	9.10053920	1.81364154		51.00000000	0.67333333	6.12769639	1.110653
52	0.20944150	9.08017440	1.90176535		52.00000000	0.66038462	5.99640748	1.132030
53	0.21930401	9.10490320	1.99674178		53.00000000	0.64792453	5.89929011	1.153377
54	0.22944415	9.07239250	2.08160739		54.00000000	0.63592593	5.76936960	1.174757
55	0.23921213	9.10076330	2.17701297		55.00000000	0.62436364	5.68218567	1.196242
56	0.24939469	9.09310630	2.26777243		56.00000000	0.61321429	5.57602268	1.217607
57	0.25953779	9.08729360	2.35849610		57.00000000	0.60245614	5.47469583	1.238970
58	0.26938915	9.08819010	2.44825981		58.00000000	0.59206897	5.38083531	1.260346
59	0.27948835	9.09157280	2.54098868		59.00000000	0.58203390	5.29160356	1.281825
60	0.28933448	9.09701160	2.63207912		60.00000000	0.57233333	5.20652297	1.303215
61	0.29948357	9.09725670	2.72447891		61.00000000	0.56295082	5.12130812	1.324577
62	0.30929324	9.08296110	2.80929847		62.00000000	0.55387097	5.03078845	1.345951
63	0.31942144	9.09567170	2.90535255		63.00000000	0.54507937	4.95786296	1.367431
64	0.32923633	9.08955000	2.99261008		64.00000000	0.53656250	4.87711167	1.388820
65	0.33937868	9.10189820	3.08899020		65.00000000	0.52830769	4.80860283	1.410210
66	0.34923825	9.08926110	3.17431764		66.00000000	0.52030303	4.72917009	1.431557
67	0.35938433	9.09138580	3.26730159		67.00000000	0.51253731	4.65967445	1.453035
68	0.36954606	9.08699990	3.35806501		68.00000000	0.50500000	4.58893495	1.474424
69	0.37938771	9.09063340	3.44887459		69.00000000	0.49768116	4.52423697	1.495804
70	0.38948542	9.08523460	3.53856641		70.00000000	0.49057143	4.45695652	1.517288
71	0.39933157	9.09729190	3.63283586		71.00000000	0.48366197	4.40001414	1.538685
72	0.40948212	9.09112360	3.72265256		72.00000000	0.47694444	4.33596089	1.560031
73	0.41933125	9.08684640	3.81039866		73.00000000	0.47041096	4.27455213	1.581403
74	0.42943639	9.08072660	3.89959445		74.00000000	0.46405405	4.21394799	1.602898
75	0.43927509	9.08402920	3.99038774		75.00000000	0.45786667	4.15927417	1.624284
76	0.44942266	9.07628440	4.07908788		76.00000000	0.45184211	4.10104745	1.645644
77	0.45955834	9.07343860	4.16977438		77.00000000	0.44597403	4.04651794	1.667025
78	0.46940225	9.08204840	4.26313395		78.00000000	0.44025641	3.99843003	1.688498
79	0.47955874	9.07442000	4.35171742		79.00000000	0.43468354	3.94450105	1.709879
80	0.48938480	9.05258660	4.43019828		80.00000000	0.42925000	3.88582280	1.731229
81	0.49953312	9.05464270	4.52309392		81.00000000	0.42395062	3.83872136	1.752603
82	0.50933385	9.02856830	4.59855545		82.00000000	0.41878049	3.78098824	1.774079
83	0.51945388	9.00459480	4.67747171		83.00000000	0.41373494	3.72551549	1.795446
84	0.52925241	8.99390410	4.76004542		84.00000000	0.40880952	3.67679365	1.816789
85	0.53940892	8.92930790	4.81654833		85.00000000	0.40400000	3.60744039	1.838177
86	0.54954827	8.86729150	4.87300470		86.00000000	0.39930233	3.54073012	1.859657
87	0.55936915	8.78553010	4.91435450		87.00000000	0.39471264	3.46775981	1.881085
88	0.56948620	8.64889430	4.92542595		88.00000000	0.39022727	3.37503443	1.902452
89	0.57929808	8.49154850	4.91913774		89.00000000	0.38584270	3.27640197	1.923822
90	0.58941144	8.21895890	4.84434840		90.00000000	0.38155556	3.13598943	1.945308
91	0.59925014	7.89213990	4.72936594		91.00000000	0.37736264	2.97819873	1.966691
92	0.60935605	7.42369410	4.52367291		92.00000000	0.37326087	2.77097452	1.988166
93	0.61913073	6.81367970	4.21855849		93.00000000	0.36924731	2.51593291	2.009572
94	0.62925225	6.00481560	3.77854373		94.00000000	0.36531915	2.19367412	2.031072
95	0.63935667	4.99027250	3.19056401		95.00000000	0.36147368	1.80385219	2.052450
96	0.64914179	3.70817830	2.40713350		96.00000000	0.35770833	1.32644628	2.073849
97	0.65926480	2.11819820	1.39645351		97.00000000	0.35402062	0.74988584	2.095194
98	0.66899407	0.24813843	0.16600314		98.00000000	0.35040816	0.08694973	2.116671
99	0.67908287	-2.01114680	-1.36573534		99.00000000	0.34686869	-0.69760385	2.138066
100	0.68880320	-4.55705500	-3.13891407		100.00000000	0.34340000	-1.56489269	2.159444
101	0.69894260	-7.57768540	-5.29636714		101.00000000	0.34000000	-2.57641304	2.180928
