# Supplementary material for: Study on the Electrical Injection Regeneration of Industrialized B-Doped Czochralski Silicon PERC Solar Cells
Source: Hindawi journal article supplement (doi:10.1155/2019/5357370), 2019-06-20
Supplement: f1 [file 5357370.f1.zip › section3.2/IVRawData_0.csv]

10:20 02/04/2018
Test Lot:	JK-PERC
Recipe:	Recipe_YJX-LID
Cell Name:	0
Test Order:	2
Test Condition:	Light
1	-0.29990658	9.10074040	-2.72937193		1.00000000	34.34000000	312.51942534	0.000000
2	-0.29005086	9.08984660	-2.63651782		2.00000000	17.17000000	156.07266612	0.061815
3	-0.27993909	9.09326740	-2.54556100		3.00000000	11.44666667	104.08760084	0.083252
4	-0.27011985	9.08902170	-2.45512518		4.00000000	8.58500000	78.02925129	0.104743
5	-0.25995520	9.08662410	-2.36211519		5.00000000	6.86800000	62.40693432	0.126120
6	-0.24980250	9.10483070	-2.27440947		6.00000000	5.72333333	52.10998104	0.147472
7	-0.23998994	9.08250330	-2.17970942		7.00000000	4.90571429	44.55616619	0.168843
8	-0.22983573	9.10292630	-2.09217771		8.00000000	4.29250000	39.07431114	0.190323
9	-0.22003138	9.09010700	-2.00010879		9.00000000	3.81555556	34.68380826	0.211708
10	-0.20985186	9.09870910	-1.90938103		10.00000000	3.43400000	31.24496705	0.233100
11	-0.20005196	9.09546660	-1.81956592		11.00000000	3.12181818	28.39439300	0.254440
12	-0.18991488	9.07417580	-1.72332101		12.00000000	2.86166667	25.96726641	0.275921
13	-0.18014029	9.10226730	-1.63968507		13.00000000	2.64153846	24.04398916	0.297290
14	-0.16998461	9.08581450	-1.54444863		14.00000000	2.45285714	22.28620500	0.318675
15	-0.16016833	9.08691120	-1.45543539		15.00000000	2.28933333	20.80296871	0.340162
16	-0.15001784	9.08916570	-1.36353701		16.00000000	2.14625000	19.50762188	0.361534
17	-0.13988598	9.08663080	-1.27109225		17.00000000	2.02000000	18.35499422	0.382875
18	-0.13004886	9.09044550	-1.18220207		18.00000000	1.90777778	17.34254992	0.404247
19	-0.11990210	9.09110930	-1.09004310		19.00000000	1.80736842	16.43098386	0.425728
20	-0.11008509	9.09329410	-1.00103610		20.00000000	1.71700000	15.61318597	0.447103
21	-0.09994726	9.08445450	-0.90796633		21.00000000	1.63523810	14.85524607	0.468469
22	-0.09014215	9.08674050	-0.81909829		22.00000000	1.56090909	14.18357585	0.489844
23	-0.07995222	9.10125450	-0.72766548		23.00000000	1.49304348	13.58856868	0.511317
24	-0.07014339	9.09149170	-0.63770802		24.00000000	1.43083333	13.00840937	0.532705
25	-0.05997504	9.07570840	-0.54431600		25.00000000	1.37360000	12.46639306	0.554063
26	-0.04984094	9.10731030	-0.45391689		26.00000000	1.32076923	12.02865522	0.575481
27	-0.04002168	9.08412550	-0.36356200		27.00000000	1.27185185	11.55366184	0.596966
28	-0.02988014	9.09141350	-0.27165267		28.00000000	1.22642857	11.14996927	0.618341
29	-0.02005046	9.09320070	-0.18232289		29.00000000	1.18413793	10.76760386	0.639709
30	-0.00990519	9.08891680	-0.09002748		30.00000000	1.14466667	10.40378010	0.661082
31	-0.00067918	9.10194210	-0.00618183		31.00000000	1.10774194	10.08260296	0.682669
32	0.00946291	9.09399030	0.08605560		32.00000000	1.07312500	9.75898834	0.704052
33	0.01929826	9.09629440	0.17554261		33.00000000	1.04060606	9.46565908	0.725412
34	0.02943579	9.08804700	0.26751387		34.00000000	1.01000000	9.17892747	0.746772
35	0.03927561	9.10257430	0.35750911		35.00000000	0.98114286	8.93092576	0.768261
36	0.04938263	9.08281420	0.44853323		36.00000000	0.95388889	8.66399555	0.789642
37	0.05925221	9.09224130	0.53873543		37.00000000	0.92810811	8.43858287	0.811008
38	0.06938379	9.07451340	0.62962416		38.00000000	0.90368421	8.20049448	0.832378
39	0.07951538	9.09820180	0.72344693		39.00000000	0.88051282	8.01108333	0.853864
40	0.08935742	9.08098130	0.81145307		40.00000000	0.85850000	7.79602245	0.875244
41	0.09951357	9.10896780	0.90646589		41.00000000	0.83756098	7.62931596	0.896625
42	0.10931319	9.09264660	0.99394621		42.00000000	0.81761905	7.43432105	0.917967
43	0.11944254	9.08271880	1.08486300		43.00000000	0.79860465	7.25350148	0.939431
44	0.12925631	9.09518810	1.17561045		44.00000000	0.78045455	7.09838089	0.960823
45	0.13941170	9.08345990	1.26634059		45.00000000	0.76311111	6.93168918	0.982205
46	0.14925449	9.10040470	1.35827626		46.00000000	0.74652174	6.79364994	1.003689
47	0.15941808	9.09321210	1.44962241		47.00000000	0.73063830	6.64384901	1.025061
48	0.16954669	9.08753870	1.54076211		48.00000000	0.71541667	6.50137664	1.046403
49	0.17934258	9.08634660	1.62956884		49.00000000	0.70081633	6.36786005	1.067788
50	0.18947864	9.09772300	1.72382418		50.00000000	0.68680000	6.24831616	1.089261
51	0.19928868	9.08285050	1.81010929		51.00000000	0.67333333	6.11578600	1.110634
52	0.20942174	9.09546180	1.90478744		52.00000000	0.66038462	6.00650304	1.131988
53	0.21926603	9.09197710	1.99356172		53.00000000	0.64792453	5.89091497	1.153360
54	0.22940728	9.08386900	2.08390568		54.00000000	0.63592593	5.77666780	1.174840
55	0.23923519	9.10105230	2.17729198		55.00000000	0.62436364	5.68236611	1.196208
56	0.24939951	9.08163740	2.26495592		56.00000000	0.61321429	5.56898979	1.217561
57	0.25950059	9.09441760	2.36000673		57.00000000	0.60245614	5.47898773	1.238938
58	0.26935381	9.08994960	2.44841256		58.00000000	0.59206897	5.38187706	1.260414
59	0.27948314	9.09145830	2.54090931		59.00000000	0.58203390	5.29153692	1.281800
60	0.28931478	9.08759020	2.62917416		60.00000000	0.57233333	5.20113079	1.303167
61	0.29945454	9.08895210	2.72172797		61.00000000	0.56295082	5.11663303	1.324583
62	0.30931520	9.09278200	2.81253568		62.00000000	0.55387097	5.03622797	1.346075
63	0.31940213	9.07823660	2.89960811		63.00000000	0.54507937	4.94835944	1.367461
64	0.32922855	9.09875300	2.99556926		64.00000000	0.53656250	4.88204966	1.388811
65	0.33937427	9.08556560	3.08340719		65.00000000	0.52830769	4.79997420	1.410192
66	0.34923044	9.08792400	3.17377970		66.00000000	0.52030303	4.72847440	1.431670
67	0.35936874	9.09250160	3.26756084		67.00000000	0.51253731	4.66024634	1.453060
68	0.36952636	9.08167930	3.35591989		68.00000000	0.50500000	4.58624805	1.474432
69	0.37936988	9.08216950	3.44550155		69.00000000	0.49768116	4.52002465	1.495797
70	0.38948733	9.08825780	3.53976126		70.00000000	0.49057143	4.45843961	1.517273
71	0.39933237	9.08053300	3.62615076		71.00000000	0.48366197	4.39190850	1.538660
72	0.40947959	9.09295560	3.72337973		72.00000000	0.47694444	4.33683466	1.560037
73	0.41928291	9.07587340	3.80535861		73.00000000	0.47041096	4.26939031	1.581386
74	0.42941377	9.08366010	3.90064873		74.00000000	0.46405405	4.21530930	1.602864
75	0.43926698	9.07713700	3.98728656		75.00000000	0.45786667	4.15611846	1.624232
76	0.44944397	9.07919600	4.08058989		76.00000000	0.45184211	4.10236303	1.645610
77	0.45957851	9.07656290	4.17139325		77.00000000	0.44597403	4.04791130	1.667085
78	0.46943843	9.06685350	4.25632947		78.00000000	0.44025641	3.99174037	1.688452
79	0.47954470	9.08300400	4.35570643		79.00000000	0.43468354	3.94823237	1.709808
80	0.48938152	9.06229400	4.43491921		80.00000000	0.42925000	3.88998970	1.731185
81	0.49949896	9.05396370	4.52244545		81.00000000	0.42395062	3.83843350	1.752660
82	0.50932318	9.04996010	4.60935446		82.00000000	0.41878049	3.78994671	1.774024
83	0.51943612	9.00571440	4.67789335		83.00000000	0.41373494	3.72597870	1.795377
84	0.52923429	8.98857400	4.75706158		84.00000000	0.40880952	3.67461466	1.816753
85	0.53935540	8.93503380	4.81915873		85.00000000	0.40400000	3.60975366	1.838229
86	0.54952049	8.86622520	4.87217242		86.00000000	0.39930233	3.54030434	1.859603
87	0.55933130	8.78723720	4.91497681		87.00000000	0.39471264	3.46843363	1.880938
88	0.56946808	8.62612440	4.91230250		88.00000000	0.39022727	3.36614900	1.902316
89	0.57926399	8.46001630	4.90058280		89.00000000	0.38584270	3.26423550	1.923810
90	0.58940005	8.18962480	4.82696527		90.00000000	0.38155556	3.12479684	1.945177
91	0.59922123	7.82633880	4.68970836		91.00000000	0.37736264	2.95336785	1.966532
92	0.60934240	7.33878330	4.47183183		92.00000000	0.37326087	2.73928064	1.988000
93	0.61914349	6.68442390	4.13861754		93.00000000	0.36924731	2.46820556	2.009510
94	0.62922448	5.83776190	3.67326270		94.00000000	0.36531915	2.13264621	2.030896
95	0.63934040	4.73887210	3.02975238		95.00000000	0.36147368	1.71297756	2.052304
96	0.64912516	3.39192030	2.20178081		96.00000000	0.35770833	1.21331816	2.073694
97	0.65926790	1.67108040	1.10168967		97.00000000	0.35402062	0.59159692	2.095194
98	0.66895515	-0.33613709	-0.22486064		98.00000000	0.35040816	-0.11778518	2.116583
99	0.67907631	-2.81595110	-1.91224568		99.00000000	0.34686869	-0.97676526	2.137951
100	0.68875611	-5.66187950	-3.89965410		100.00000000	0.34340000	-1.94428942	2.159307
101	0.69908345	-9.10310080	-6.36382711		101.00000000	0.34000000	-3.09505427	2.180798
10:20 02/04/2018
Test Lot:	JK-PERC
Recipe:	Recipe_YJX-LID
Cell Name:	0
Test Order:	3
Test Condition:	Light
1	-0.29985759	9.08222580	-2.72337434		1.00000000	34.34000000	311.88363397	0.000000
2	-0.29009500	9.08910750	-2.63670464		2.00000000	17.17000000	156.05997578	0.061801
3	-0.27992305	9.09420590	-2.54567785		3.00000000	11.44666667	104.09834354	0.083222
4	-0.27012700	9.08471200	-2.45402600		4.00000000	8.58500000	77.99225252	0.104721
5	-0.25995430	9.09690480	-2.36477952		5.00000000	6.86800000	62.47754217	0.126112
6	-0.24980396	9.08700850	-2.26997071		6.00000000	5.72333333	52.00797865	0.147465
7	-0.23998110	9.08698840	-2.18070547		7.00000000	4.90571429	44.57816881	0.168881
8	-0.22983149	9.07996270	-2.08686136		8.00000000	4.29250000	38.97573989	0.190404
9	-0.22000714	9.08558650	-1.99889390		9.00000000	3.81555556	34.66656005	0.211787
10	-0.20988953	9.08362200	-1.90655715		10.00000000	3.43400000	31.19315795	0.233153
11	-0.20003244	9.08118720	-1.81653203		11.00000000	3.12181818	28.34981531	0.254531
12	-0.18991037	9.08575820	-1.72547970		12.00000000	2.86166667	26.00041138	0.276008
13	-0.18009569	9.10127830	-1.63910100		13.00000000	2.64153846	24.04137668	0.297390
14	-0.16996990	9.08864880	-1.54479673		14.00000000	2.45285714	22.29315713	0.318763
15	-0.16016044	9.08341880	-1.45480435		15.00000000	2.28933333	20.79497344	0.340117
16	-0.15001751	9.08076000	-1.36227300		16.00000000	2.14625000	19.48958115	0.361599
17	-0.13985898	9.09146400	-1.27152288		17.00000000	2.02000000	18.36475728	0.382967
18	-0.13000634	9.09388730	-1.18226300		18.00000000	1.90777778	17.34911610	0.404347
19	-0.11985673	9.09081650	-1.08959554		19.00000000	1.80736842	16.43045466	0.425707
20	-0.11002866	9.09019090	-1.00018152		20.00000000	1.71700000	15.60785778	0.447181
21	-0.09988277	9.08302310	-0.90723754		21.00000000	1.63523810	14.85290539	0.468569
22	-0.09009267	9.08168790	-0.81819347		22.00000000	1.56090909	14.17568920	0.489950
23	-0.07994826	9.09070490	-0.72678605		23.00000000	1.49304348	13.57281766	0.511434
24	-0.07007628	9.08803650	-0.63685578		24.00000000	1.43083333	13.00346556	0.532818
25	-0.05997132	9.07817550	-0.54443018		25.00000000	1.37360000	12.46978187	0.554159
26	-0.04982022	9.08556650	-0.45264490		26.00000000	1.32076923	11.99993668	0.575533
27	-0.03996387	9.09782890	-0.36358443		27.00000000	1.27185185	11.57109053	0.597006
28	-0.02983807	9.08366390	-0.27103902		28.00000000	1.22642857	11.14046494	0.618385
29	-0.02001075	9.08642100	-0.18182609		29.00000000	1.18413793	10.75957576	0.639726
30	-0.00989612	9.09274100	-0.08998284		30.00000000	1.14466667	10.40815753	0.661109
31	-0.00063820	9.07982060	-0.00579478		31.00000000	1.10774194	10.05809805	0.682708
32	0.00948664	9.08362580	0.08617309		32.00000000	1.07312500	9.74786594	0.704093
33	0.01930029	9.07811830	0.17521028		33.00000000	1.04060606	9.44674492	0.725454
34	0.02944291	9.09393600	0.26775196		34.00000000	1.01000000	9.18487536	0.746831
35	0.03925656	9.09220310	0.35692860		35.00000000	0.98114286	8.92075013	0.768306
36	0.04943268	9.08867070	0.44927731		36.00000000	0.95388889	8.66958200	0.789685
37	0.05923888	9.08073040	0.53793227		37.00000000	0.92810811	8.42789951	0.811027
38	0.06939193	9.09097190	0.63084008		38.00000000	0.90368421	8.21536776	0.832401
39	0.07951446	9.07091240	0.72126869		39.00000000	0.88051282	7.98705466	0.853887
40	0.08934299	9.09627530	0.81268842		40.00000000	0.85850000	7.80915235	0.875262
41	0.09947743	9.07637120	0.90289404		41.00000000	0.83756098	7.60201432	0.896619
42	0.10929851	9.09409430	0.99397096		42.00000000	0.81761905	7.43550472	0.917994
43	0.11948431	9.07569690	1.08440338		43.00000000	0.79860465	7.24789376	0.939458
44	0.12930465	9.09228040	1.17567413		44.00000000	0.78045455	7.09611157	0.960848
45	0.13940708	9.09395890	1.26776226		45.00000000	0.76311111	6.93970108	0.982205
46	0.14924976	9.08425620	1.35582306		46.00000000	0.74652174	6.78159474	1.003574
47	0.15940876	9.08251090	1.44783180		47.00000000	0.73063830	6.63603030	1.025041
48	0.16955064	9.08464720	1.54030775		48.00000000	0.71541667	6.49930802	1.046424
49	0.17937322	9.08284280	1.62921876		49.00000000	0.70081633	6.36540453	1.067854
50	0.18951510	9.07987400	1.72077323		50.00000000	0.68680000	6.23605746	1.089218
51	0.19933024	9.08045010	1.81000830		51.00000000	0.67333333	6.11416973	1.110697
52	0.20944607	9.09199140	1.90428187		52.00000000	0.66038462	6.00421124	1.132082
53	0.21928503	9.07198050	1.98934952		53.00000000	0.64792453	5.87795869	1.153463
54	0.22944774	9.09235380	2.08622003		54.00000000	0.63592593	5.78206351	1.174951
55	0.23924203	9.08456710	2.17341027		55.00000000	0.62436364	5.67207335	1.196346
56	0.24939211	9.08827500	2.26654408		56.00000000	0.61321429	5.57306006	1.217696
57	0.25953695	9.08160310	2.35701157		57.00000000	0.60245614	5.47126755	1.239067
58	0.26935360	9.09603020	2.45004848		58.00000000	0.59206897	5.38547719	1.260562
59	0.27949622	9.09747030	2.54270856		59.00000000	0.58203390	5.29503610	1.281949
60	0.28935525	9.07672310	2.62639748		60.00000000	0.57233333	5.19491119	1.303296
61	0.29948971	9.09545900	2.72399638		61.00000000	0.56295082	5.12029610	1.324683
62	0.30930409	9.08053970	2.80864807		62.00000000	0.55387097	5.02944731	1.346167
63	0.31944969	9.08779620	2.90309368		63.00000000	0.54507937	4.95357018	1.367541
64	0.32927376	9.08244230	2.99060993		64.00000000	0.53656250	4.87329795	1.388894
65	0.33944020	9.09710310	3.08792250		65.00000000	0.52830769	4.80606955	1.410274
66	0.34922409	9.07480910	3.16914195		66.00000000	0.52030303	4.72165067	1.431757
67	0.35938606	9.08121110	3.26366068		67.00000000	0.51253731	4.65445954	1.453146
68	0.36954430	9.08838840	3.35856213		68.00000000	0.50500000	4.58963614	1.474487
69	0.37936613	9.07790660	3.44385030		69.00000000	0.49768116	4.51790308	1.495869
70	0.38949388	9.08031650	3.53672771		70.00000000	0.49057143	4.45454384	1.517356
71	0.39932019	9.08384900	3.62736431		71.00000000	0.48366197	4.39351232	1.538728
72	0.40947473	9.07404140	3.71559065		72.00000000	0.47694444	4.32781363	1.560080
73	0.41929209	9.08475690	3.80916671		73.00000000	0.47041096	4.27356920	1.581460
74	0.42943919	9.07826900	3.89856449		74.00000000	0.46405405	4.21280753	1.602932
75	0.43926176	9.07775970	3.98751270		75.00000000	0.45786667	4.15640357	1.624310
76	0.44942820	9.07667830	4.07931519		76.00000000	0.45184211	4.10122543	1.645671
77	0.45956188	9.07336710	4.16977364		77.00000000	0.44597403	4.04648605	1.667031
78	0.46942616	9.07659630	4.26079175		78.00000000	0.44025641	3.99602970	1.688514
79	0.47955984	9.06162550	4.34559167		79.00000000	0.43468354	3.93893949	1.709902
80	0.48936456	9.06755830	4.43734168		80.00000000	0.42925000	3.89224940	1.731290
81	0.49948710	9.02867600	4.50970719		81.00000000	0.42395062	3.82771276	1.752634
82	0.50931263	9.03272440	4.60048062		82.00000000	0.41878049	3.78272873	1.774110
83	0.51947832	9.00929070	4.68013120		83.00000000	0.41373494	3.72745835	1.795500
84	0.52927560	8.97641660	4.75099828		84.00000000	0.40880952	3.66964460	1.816892
85	0.53940487	8.93014140	4.81696176		85.00000000	0.40400000	3.60777713	1.838372
86	0.54954374	8.85669140	4.86713932		86.00000000	0.39930233	3.53649747	1.859750
87	0.55934846	8.77886390	4.91044400		87.00000000	0.39471264	3.46512858	1.881103
88	0.56948292	8.62875460	4.91392837		88.00000000	0.39022727	3.36717537	1.902508
89	0.57930547	8.43690780	4.88754684		89.00000000	0.38584270	3.25531926	1.923996
90	0.58942205	8.16548250	4.81291543		90.00000000	0.38155556	3.11558521	1.945380
91	0.59924239	7.79617830	4.67180052		91.00000000	0.37736264	2.94198640	1.966725
92	0.60935003	7.31322480	4.45631375		92.00000000	0.37326087	2.72974065	1.988203
93	0.61916071	6.67994590	4.13596005		93.00000000	0.36924731	2.46655207	2.009714
94	0.62921995	5.81859060	3.66117329		94.00000000	0.36531915	2.12564257	2.031107
95	0.63936406	4.71863460	3.01692538		95.00000000	0.36147368	1.70566223	2.052471
96	0.64914352	3.39438960	2.20344601		96.00000000	0.35770833	1.21420145	2.073839
97	0.65928984	1.69250880	1.11585386		97.00000000	0.35402062	0.59918301	2.095320
98	0.66898811	-0.30021140	-0.20083786		98.00000000	0.35040816	-0.10519653	2.116699
99	0.67903918	-2.73044590	-1.85407974		99.00000000	0.34686869	-0.94710618	2.138041
100	0.68876946	-5.53205110	-3.81030785		100.00000000	0.34340000	-1.89970635	2.159423
101	0.69902968	-8.90650080	-6.22590840		101.00000000	0.34000000	-3.02821027	2.180940
10:21 02/04/2018
Test Lot:	JK-PERC
Recipe:	Recipe_YJX-LID
Cell Name:	0
Test Order:	4
Test Condition:	Light
1	-0.29984617	9.08389470	-2.72377103		1.00000000	34.34000000	311.94094400	0.000000
2	-0.29006058	9.07684610	-2.63283524		2.00000000	17.17000000	155.84944754	0.061792
3	-0.27990434	9.09652610	-2.54615713		3.00000000	11.44666667	104.12490209	0.083217
4	-0.27006441	9.08099270	-2.45245294		4.00000000	8.58500000	77.96032233	0.104723
5	-0.25993121	9.08677200	-2.36193564		5.00000000	6.86800000	62.40795010	0.126168
6	-0.24974817	9.08302880	-2.26846982		6.00000000	5.72333333	51.98520150	0.147529
7	-0.23997152	9.09786990	-2.18322967		7.00000000	4.90571429	44.63155034	0.168920
8	-0.22981377	9.08348750	-2.08751051		8.00000000	4.29250000	38.99087009	0.190399
9	-0.21997312	9.09331420	-2.00028470		9.00000000	3.81555556	34.69604551	0.211764
10	-0.20987417	9.08188920	-1.90605396		10.00000000	3.43400000	31.18720751	0.233121
11	-0.20000373	9.09271340	-1.81857660		11.00000000	3.12181818	28.38579801	0.254500
12	-0.18986981	9.08872320	-1.72567415		12.00000000	2.86166667	26.00889622	0.276016
13	-0.18008050	9.08803370	-1.63657765		13.00000000	2.64153846	24.00639056	0.297398
14	-0.16993541	9.08889290	-1.54452474		14.00000000	2.45285714	22.29375587	0.318761
15	-0.16011409	9.08999920	-1.45543695		15.00000000	2.28933333	20.81003817	0.340126
16	-0.14993402	9.08312700	-1.36186975		16.00000000	2.14625000	19.49466132	0.361604
17	-0.13981052	9.07737830	-1.26911298		17.00000000	2.02000000	18.33630417	0.382977
18	-0.12998995	9.08560370	-1.18103717		18.00000000	1.90777778	17.33331284	0.404372
19	-0.11983667	9.07540230	-1.08756599		19.00000000	1.80736842	16.40259553	0.425720
20	-0.11000346	9.09188840	-1.00013918		20.00000000	1.71700000	15.61077238	0.447196
21	-0.09983826	9.07063290	-0.90559624		21.00000000	1.63523810	14.83264447	0.468583
22	-0.09005566	9.08689690	-0.81832649		22.00000000	1.56090909	14.18381998	0.489965
23	-0.07989346	9.08347420	-0.72571014		23.00000000	1.49304348	13.56202191	0.511446
24	-0.07007140	9.08421710	-0.63654380		24.00000000	1.43083333	12.99800063	0.532845
25	-0.05992705	9.09316350	-0.54492646		25.00000000	1.37360000	12.49036938	0.554200
26	-0.04975293	9.08596610	-0.45205345		26.00000000	1.32076923	12.00046446	0.575575
27	-0.03994799	9.07681080	-0.36260038		27.00000000	1.27185185	11.54435862	0.597056
28	-0.02981109	9.07999520	-0.27068457		28.00000000	1.22642857	11.13596554	0.618435
29	-0.01999946	9.08777810	-0.18175064		29.00000000	1.18413793	10.76118276	0.639791
30	-0.00984320	9.09538460	-0.08952770		30.00000000	1.14466667	10.41118357	0.661180
31	-0.00062330	9.07465270	-0.00565625		31.00000000	1.10774194	10.05237335	0.682771
32	0.00951265	9.08756160	0.08644678		32.00000000	1.07312500	9.75208954	0.704163
33	0.01927786	9.07706260	0.17498632		33.00000000	1.04060606	9.44564635	0.725511
34	0.02946732	9.09308530	0.26794882		34.00000000	1.01000000	9.18401615	0.746883
35	0.03928909	9.08672520	0.35700917		35.00000000	0.98114286	8.91537552	0.768373
36	0.04940263	9.07601450	0.44837900		36.00000000	0.95388889	8.65750939	0.789759
37	0.05925790	9.08680060	0.53846474		37.00000000	0.92810811	8.43353331	0.811097
38	0.06940047	9.08581540	0.63055983		38.00000000	0.90368421	8.21070792	0.832481
39	0.07954378	9.09939670	0.72380045		39.00000000	0.88051282	8.01213545	0.853964
40	0.08934472	9.08470920	0.81167078		40.00000000	0.85850000	7.79922285	0.875344
41	0.09952524	9.09176350	0.90485997		41.00000000	0.83756098	7.61490631	0.896700
42	0.10935521	9.08124160	0.99308108		42.00000000	0.81761905	7.42499611	0.918076
43	0.11948214	9.09134100	1.08625288		43.00000000	0.79860465	7.26038721	0.939553
44	0.12931062	9.07544710	1.17355169		44.00000000	0.78045455	7.08297394	0.960931
45	0.13947180	9.08510680	1.26711620		45.00000000	0.76311111	6.93294594	0.982295
46	0.14927869	9.08059880	1.35553989		46.00000000	0.74652174	6.77886441	1.003658
47	0.15943763	9.08508680	1.44850471		47.00000000	0.73063830	6.63791236	1.025147
48	0.16960253	9.08366300	1.54061223		48.00000000	0.71541667	6.49860390	1.046527
49	0.17941090	9.09315400	1.63141094		49.00000000	0.70081633	6.37263078	1.067912
50	0.18954156	9.06795120	1.71875362		50.00000000	0.68680000	6.22786888	1.089261
51	0.19935665	9.08852290	1.81185748		51.00000000	0.67333333	6.11960542	1.110731
52	0.20948432	9.08111000	1.90235015		52.00000000	0.66038462	5.99702533	1.132136
53	0.21929196	9.09163860	1.99372325		53.00000000	0.64792453	5.89069565	1.153515
54	0.22944719	9.07957460	2.08328288		54.00000000	0.63592593	5.77393688	1.174990
55	0.23926598	9.07581140	2.17153291		55.00000000	0.62436364	5.66660661	1.196378
56	0.24944799	9.08162690	2.26539358		56.00000000	0.61321429	5.56898335	1.217728
57	0.25958535	9.08115480	2.35733475		57.00000000	0.60245614	5.47099747	1.239102
58	0.26939225	9.08333400	2.44697978		58.00000000	0.59206897	5.37796016	1.260575
59	0.27954078	9.08703900	2.54019797		59.00000000	0.58203390	5.28896473	1.281956
60	0.28935808	9.08621120	2.62916863		60.00000000	0.57233333	5.20034154	1.303316
61	0.29953116	9.07949730	2.71959236		61.00000000	0.56295082	5.11131045	1.324693
62	0.30932838	9.06893060	2.80527761		62.00000000	0.55387097	5.02301737	1.346165
63	0.31943893	9.09128090	2.90410904		63.00000000	0.54507937	4.95546962	1.367541
64	0.32928601	9.08733940	2.99233373		64.00000000	0.53656250	4.87592555	1.388900
65	0.33945093	9.07589440	3.08082079		65.00000000	0.52830769	4.79486483	1.410277
66	0.34923548	9.07738970	3.17014655		66.00000000	0.52030303	4.72299337	1.431754
67	0.35940930	9.08575060	3.26550326		67.00000000	0.51253731	4.65678620	1.453128
68	0.36956975	9.08354470	3.35700334		68.00000000	0.50500000	4.58719007	1.474470
69	0.37938407	9.08086970	3.44513731		69.00000000	0.49768116	4.51937776	1.495852
70	0.38953409	9.08251950	3.53795097		70.00000000	0.49057143	4.45562457	1.517344
71	0.39934617	9.08894350	3.62963478		71.00000000	0.48366197	4.39597634	1.538734
72	0.40947089	9.07705120	3.71678823		72.00000000	0.47694444	4.32924914	1.560078
73	0.41930234	9.07579420	3.80550175		73.00000000	0.47041096	4.26935305	1.581448
74	0.42947319	9.09058670	3.90416327		74.00000000	0.46405405	4.21852361	1.602924
75	0.43930689	9.07337470	3.98599602		75.00000000	0.45786667	4.15439583	1.624302
76	0.44945392	9.07742310	4.07988340		76.00000000	0.45184211	4.10156196	1.645656
77	0.45957044	9.07509040	4.17064329		77.00000000	0.44597403	4.04725460	1.667031
78	0.46945176	9.07787510	4.26162444		78.00000000	0.44025641	3.99659270	1.688523
79	0.47956753	9.07158570	4.35043795		79.00000000	0.43468354	3.94326902	1.709908
80	0.48941088	9.04177860	4.42514482		80.00000000	0.42925000	3.88118346	1.731304
81	0.49952516	9.05179310	4.52159840		81.00000000	0.42395062	3.83751327	1.752651
82	0.50934917	9.03141310	4.60014277		82.00000000	0.41878049	3.78217958	1.774122
83	0.51951259	9.00745870	4.67948820		83.00000000	0.41373494	3.72670038	1.795554
84	0.52927256	8.97986510	4.75279619		84.00000000	0.40880952	3.67105438	1.816962
85	0.53942555	8.92397400	4.81381958		85.00000000	0.40400000	3.60528550	1.838456
86	0.54955995	8.85430530	4.86597158		86.00000000	0.39930233	3.53554470	1.859832
87	0.55938917	8.76237870	4.90157975		87.00000000	0.39471264	3.45862166	1.881177
88	0.56952506	8.61360070	4.90566146		88.00000000	0.39022727	3.36126191	1.902554
89	0.57930213	8.44094090	4.88985504		89.00000000	0.38584270	3.25687540	1.924042
90	0.58941793	8.15803530	4.80849228		90.00000000	0.38155556	3.11274369	1.945421
91	0.59925014	7.81694940	4.68430802		91.00000000	0.37736264	2.94982464	1.966776
92	0.60933167	7.30897520	4.45359006		92.00000000	0.37326087	2.72815444	1.988247
93	0.61915267	6.69181160	4.14325302		93.00000000	0.36924731	2.47093344	2.009754
94	0.62929302	5.82055090	3.66283205		94.00000000	0.36531915	2.12635870	2.031160
95	0.63937306	4.72737030	3.02255321		95.00000000	0.36147368	1.70881996	2.052516
96	0.64914721	3.39209150	2.20196673		96.00000000	0.35770833	1.21337940	2.073894
97	0.65931880	1.68648280	1.11192982		97.00000000	0.35402062	0.59704968	2.095387
98	0.66896570	-0.30067056	-0.20113829		98.00000000	0.35040816	-0.10535742	2.116768
99	0.67909336	-2.73641610	-1.85828200		99.00000000	0.34686869	-0.94917706	2.138178
100	0.68878263	-5.54207940	-3.81728802		100.00000000	0.34340000	-1.90315007	2.159571
101	0.69911504	-8.92892070	-6.24234275		101.00000000	0.34000000	-3.03583304	2.181059
11:13 02/04/2018
Test Lot:	JK-PERC
Recipe:	Recipe_YJX-LID
Cell Name:	0
Test Order:	2
Test Condition:	Light
1	-0.29989442	9.10592750	-2.73081685		1.00000000	34.34000000	312.69755035	0.000000
2	-0.29010957	9.09426690	-2.63833386		2.00000000	17.17000000	156.14856267	0.061801
3	-0.27993250	9.08935550	-2.54440601		3.00000000	11.44666667	104.04282262	0.083284
4	-0.27010301	9.09984590	-2.45789577		4.00000000	8.58500000	78.12217705	0.104649
5	-0.25996238	9.09424690	-2.36416207		5.00000000	6.86800000	62.45928771	0.126149
6	-0.24979794	9.08845810	-2.27027811		6.00000000	5.72333333	52.01627519	0.147543
7	-0.23999226	9.09892850	-2.18367241		7.00000000	4.90571429	44.63674353	0.168921
8	-0.22982559	9.09265520	-2.08972485		8.00000000	4.29250000	39.03022245	0.190324
9	-0.22000726	9.10349940	-2.00283596		9.00000000	3.81555556	34.73490771	0.211796
10	-0.20984282	9.09177400	-1.90784349		10.00000000	3.43400000	31.22115192	0.233186
11	-0.20001109	9.07866190	-1.81583306		11.00000000	3.12181818	28.34193179	0.254541
12	-0.18988536	9.09892460	-1.72775257		12.00000000	2.86166667	26.03808923	0.275913
13	-0.18011913	9.09063910	-1.63739801		13.00000000	2.64153846	24.01327282	0.297412
14	-0.16998222	9.08601000	-1.54446015		14.00000000	2.45285714	22.28668453	0.318792
15	-0.16014381	9.09667020	-1.45677542		15.00000000	2.28933333	20.82531031	0.340167
16	-0.15001287	9.08691410	-1.36315406		16.00000000	2.14625000	19.50278939	0.361530
17	-0.13984545	9.10670470	-1.27353122		17.00000000	2.02000000	18.39554349	0.383006
18	-0.13003604	9.08247850	-1.18104954		18.00000000	1.90777778	17.32735065	0.404391
19	-0.11991552	9.09977630	-1.09120441		19.00000000	1.80736842	16.44664832	0.425784
20	-0.11009496	9.07877060	-0.99952689		20.00000000	1.71700000	15.58824912	0.447136
21	-0.09990671	9.09266850	-0.90841855		21.00000000	1.63523810	14.86867792	0.468603
22	-0.09007349	9.08282090	-0.81812137		22.00000000	1.56090909	14.17745771	0.489971
23	-0.07995669	9.10106950	-0.72769137		23.00000000	1.49304348	13.58829246	0.511348
24	-0.07012570	9.09336570	-0.63767863		24.00000000	1.43083333	13.01109076	0.532822
25	-0.05997838	9.09568880	-0.54554469		25.00000000	1.37360000	12.49383814	0.554207
26	-0.04981171	9.09068780	-0.45282270		26.00000000	1.32076923	12.00670073	0.575573
27	-0.04003581	9.08464430	-0.36371107		27.00000000	1.27185185	11.55432168	0.596950
28	-0.02987583	9.10704710	-0.27208063		28.00000000	1.22642857	11.16914276	0.618429
29	-0.01999424	9.08566280	-0.18166090		29.00000000	1.18413793	10.75867795	0.639826
30	-0.00989083	9.09337230	-0.08994103		30.00000000	1.14466667	10.40888016	0.661179
31	-0.00064340	9.10006330	-0.00585495		31.00000000	1.10774194	10.08052173	0.682677
32	0.00951860	9.08800410	0.08650508		32.00000000	1.07312500	9.75256440	0.704183
33	0.01933293	9.08865450	0.17571031		33.00000000	1.04060606	9.45770896	0.725566
34	0.02946210	9.09129810	0.26784869		34.00000000	1.01000000	9.18221108	0.746926
35	0.03928610	9.08913230	0.35707655		35.00000000	0.98114286	8.91773723	0.768310
36	0.04942122	9.08957100	0.44921770		36.00000000	0.95388889	8.67044078	0.789779
37	0.05924523	9.09302900	0.53871855		37.00000000	0.92810811	8.43931394	0.811169
38	0.06941905	9.08953290	0.63098673		38.00000000	0.90368421	8.21406736	0.832525
39	0.07955492	9.08960250	0.72312255		39.00000000	0.88051282	8.00351153	0.853900
40	0.08936850	9.10209370	0.81344046		40.00000000	0.85850000	7.81414744	0.875394
41	0.09952892	9.09063240	0.90478086		41.00000000	0.83756098	7.61395894	0.896775
42	0.10933433	9.09283830	0.99415938		42.00000000	0.81761905	7.43447779	0.918130
43	0.11948135	9.08644010	1.08566013		43.00000000	0.79860465	7.25647333	0.939511
44	0.12929791	9.08702280	1.17493306		44.00000000	0.78045455	7.09200825	0.961003
45	0.13943675	9.09293370	1.26788912		45.00000000	0.76311111	6.93891874	0.982435
46	0.14926672	9.08455470	1.35602168		46.00000000	0.74652174	6.78181757	1.003802
47	0.15942937	9.09311390	1.44970942		47.00000000	0.73063830	6.64377726	1.025182
48	0.16955705	9.08376030	1.54021560		48.00000000	0.71541667	6.49867351	1.046652
49	0.17938851	9.09319210	1.63121418		49.00000000	0.70081633	6.37265748	1.068024
50	0.18952362	9.09318070	1.72337252		50.00000000	0.68680000	6.24519650	1.089400
51	0.19931041	9.08633520	1.81100119		51.00000000	0.67333333	6.11813237	1.110752
52	0.20943883	9.08681580	1.90313207		52.00000000	0.66038462	6.00079336	1.132244
53	0.21927549	9.08574770	1.99228178		53.00000000	0.64792453	5.88687879	1.153622
54	0.22944114	9.07933620	2.08317325		54.00000000	0.63592593	5.77378528	1.175012
55	0.23924728	9.08616640	2.17384060		55.00000000	0.62436364	5.67307189	1.196492
56	0.24940398	9.07445140	2.26320430		56.00000000	0.61321429	5.56458323	1.217864
57	0.25951380	9.09181590	2.35945169		57.00000000	0.60245614	5.47742032	1.239230
58	0.26937503	9.09354780	2.44957471		58.00000000	0.59206897	5.38400744	1.260613
59	0.27950716	9.07863040	2.53754220		59.00000000	0.58203390	5.28407064	1.282090
60	0.28932446	9.08519170	2.62856818		60.00000000	0.57233333	5.19975805	1.303482
61	0.29945213	9.08346840	2.72006396		61.00000000	0.56295082	5.11354598	1.324837
62	0.30930516	9.08135510	2.80890999		62.00000000	0.55387097	5.02989894	1.346220
63	0.31943956	9.08361150	2.90166486		63.00000000	0.54507937	4.95128919	1.367704
64	0.32929331	9.09172530	2.99384432		64.00000000	0.53656250	4.87827886	1.389079
65	0.33944035	9.08406260	3.08349739		65.00000000	0.52830769	4.79918015	1.410435
66	0.34924427	9.07781890	3.17037623		66.00000000	0.52030303	4.72321668	1.431824
67	0.35940170	9.09098150	3.26731421		67.00000000	0.51253731	4.65946723	1.453310
68	0.36957330	9.07816310	3.35504669		68.00000000	0.50500000	4.58447237	1.474695
69	0.37938392	9.09089950	3.44894109		69.00000000	0.49768116	4.52436940	1.496040
70	0.38953540	9.08379550	3.53845991		70.00000000	0.49057143	4.45625054	1.517425
71	0.39936164	9.08880520	3.62972015		71.00000000	0.48366197	4.39590944	1.538915
72	0.40949675	9.08542540	3.72045217		72.00000000	0.47694444	4.33324317	1.560287
73	0.41932076	9.07165810	3.80393457		73.00000000	0.47041096	4.26740739	1.581679
74	0.42947376	9.08442780	3.90152336		74.00000000	0.46405405	4.21566555	1.603066
75	0.43929479	9.07575130	3.98693026		75.00000000	0.45786667	4.15548400	1.624540
76	0.44944853	9.08447270	4.08300290		76.00000000	0.45184211	4.10474727	1.645924
77	0.45954642	9.07254700	4.16925649		77.00000000	0.44597403	4.04612031	1.667289
78	0.46942177	9.06689360	4.25619724		78.00000000	0.44025641	3.99175803	1.688641
79	0.47955912	9.06870750	4.34898139		79.00000000	0.43468354	3.94201792	1.710118
80	0.48937494	9.05711080	4.43232305		80.00000000	0.42925000	3.88776481	1.731502
81	0.49950486	9.03707600	4.51406338		81.00000000	0.42395062	3.83127395	1.752878
82	0.50931472	9.03682230	4.60258662		82.00000000	0.41878049	3.78444485	1.774247
83	0.51948333	9.01107880	4.68110522		83.00000000	0.41373494	3.72819814	1.795720
84	0.52925897	8.98023410	4.75286945		84.00000000	0.40880952	3.67120523	1.817099
85	0.53939706	8.94154070	4.82304077		85.00000000	0.40400000	3.61238244	1.838493
86	0.54953963	8.85511490	4.86623657		86.00000000	0.39930233	3.53586797	1.859969
87	0.55937701	8.79068470	4.91730692		87.00000000	0.39471264	3.46979440	1.881333
88	0.56950319	8.64950940	4.92592320		88.00000000	0.39022727	3.37527446	1.902701
89	0.57930118	8.47045040	4.90694191		89.00000000	0.38584270	3.26826142	1.924085
90	0.58944076	8.23383330	4.85335696		90.00000000	0.38155556	3.14166484	1.945553
91	0.59924394	7.88956830	4.72777599		91.00000000	0.37736264	2.97722830	1.966920
92	0.60937381	7.43104700	4.52828542		92.00000000	0.37326087	2.77371907	1.988391
93	0.61912417	6.83089300	4.22917096		93.00000000	0.36924731	2.52228888	2.009811
94	0.62927938	6.03455830	3.79742311		94.00000000	0.36531915	2.20453970	2.031316
95	0.63938177	4.99112270	3.19123287		95.00000000	0.36147368	1.80415951	2.052694
96	0.64918935	3.73506210	2.42476254		96.00000000	0.35770833	1.33606284	2.074117
97	0.65929025	2.13096710	1.40492583		97.00000000	0.35402062	0.75440629	2.095513
98	0.66904354	0.26293615	0.17591573		98.00000000	0.35040816	0.09213497	2.117004
99	0.67909235	-2.00732090	-1.36315627		99.00000000	0.34686869	-0.69627676	2.138399
100	0.68881434	-4.55900430	-3.14030754		100.00000000	0.34340000	-1.56556208	2.159751
101	0.69899637	-7.62699990	-5.33124524		101.00000000	0.34000000	-2.59317997	2.181126
11:13 02/04/2018
Test Lot:	JK-PERC
Recipe:	Recipe_YJX-LID
Cell Name:	0
Test Order:	3
Test Condition:	Light
1	-0.29985437	9.09625630	-2.72755220		1.00000000	34.34000000	312.36544134	0.000000
2	-0.29007494	9.09134670	-2.63717185		2.00000000	17.17000000	156.09842284	0.061792
3	-0.27993304	9.09325120	-2.54550145		3.00000000	11.44666667	104.08741540	0.083193
4	-0.27015284	9.09097100	-2.45595163		4.00000000	8.58500000	78.04598604	0.104633
5	-0.25996181	9.10015960	-2.36569396		5.00000000	6.86800000	62.49989613	0.126135
6	-0.24979161	9.09018710	-2.27065247		6.00000000	5.72333333	52.02617084	0.147536
7	-0.24000324	9.09409710	-2.18261277		7.00000000	4.90571429	44.61304206	0.168912
8	-0.22987026	9.09229470	-2.09004815		8.00000000	4.29250000	39.02867500	0.190253
9	-0.22002457	9.08801940	-1.99958756		9.00000000	3.81555556	34.67584291	0.211725
10	-0.20984693	9.09905720	-1.90940922		10.00000000	3.43400000	31.24616242	0.233100
11	-0.20005409	9.08347130	-1.81718558		11.00000000	3.12181818	28.35694586	0.254473
12	-0.18992931	9.08764550	-1.72601024		12.00000000	2.86166667	26.00581221	0.275901
13	-0.18012382	9.07684800	-1.63495654		13.00000000	2.64153846	23.97684310	0.297382
14	-0.16996032	9.08756350	-1.54452520		14.00000000	2.45285714	22.29049504	0.318766
15	-0.16014144	9.08997340	-1.45568143		15.00000000	2.28933333	20.80997910	0.340147
16	-0.14999208	9.08556750	-1.36276317		16.00000000	2.14625000	19.49989925	0.361501
17	-0.13982485	9.09596250	-1.27184159		17.00000000	2.02000000	18.37384425	0.382988
18	-0.13002978	9.09108830	-1.18211221		18.00000000	1.90777778	17.34377623	0.404362
19	-0.11986033	9.08951090	-1.08947178		19.00000000	1.80736842	16.42809496	0.425737
20	-0.11003326	9.09170720	-1.00039018		20.00000000	1.71700000	15.61046126	0.447102
21	-0.09987646	9.09222130	-0.90809884		21.00000000	1.63523810	14.86794664	0.468588
22	-0.09006576	9.08854960	-0.81856715		22.00000000	1.56090909	14.18639969	0.489963
23	-0.07992459	9.09195420	-0.72667072		23.00000000	1.49304348	13.57468292	0.511360
24	-0.07008189	9.08714960	-0.63684462		24.00000000	1.43083333	13.00219655	0.532703
25	-0.05997049	9.08011720	-0.54453909		25.00000000	1.37360000	12.47244899	0.554176
26	-0.04977796	9.09569070	-0.45276495		26.00000000	1.32076923	12.01330841	0.575602
27	-0.04000448	9.08195590	-0.36331893		27.00000000	1.27185185	11.55090243	0.596996
28	-0.02982758	9.09345440	-0.27123577		28.00000000	1.22642857	11.15247229	0.618488
29	-0.02000944	9.08405020	-0.18176677		29.00000000	1.18413793	10.75676841	0.639869
30	-0.00989804	9.07914070	-0.08986574		30.00000000	1.14466667	10.39258972	0.661216
31	-0.00063367	9.08476450	-0.00575671		31.00000000	1.10774194	10.06357461	0.682713
32	0.00949539	9.08579920	0.08627318		32.00000000	1.07312500	9.75019827	0.704195
33	0.01930283	9.09351440	0.17553054		33.00000000	1.04060606	9.46276620	0.725575
34	0.02941394	9.09930710	0.26764646		34.00000000	1.01000000	9.19030017	0.746934
35	0.03927720	9.09578900	0.35725712		35.00000000	0.98114286	8.92426841	0.768305
36	0.04942255	9.08818440	0.44916122		36.00000000	0.95388889	8.66911812	0.789788
37	0.05923743	9.08636000	0.53825263		37.00000000	0.92810811	8.43312439	0.811179
38	0.06937757	9.09315780	0.63086120		38.00000000	0.90368421	8.21734313	0.832534
39	0.07953408	9.08007340	0.72217525		39.00000000	0.88051282	7.99512104	0.853909
40	0.08931175	9.09362130	0.81216722		40.00000000	0.85850000	7.80687389	0.875401
41	0.09950026	9.08286760	0.90374770		41.00000000	0.83756098	7.60745545	0.896800
42	0.10929580	9.08665560	0.99313329		42.00000000	0.81761905	7.42942270	0.918177
43	0.11945082	9.08385370	1.08507377		43.00000000	0.79860465	7.25440782	0.939558
44	0.12931259	9.08249380	1.17448080		44.00000000	0.78045455	7.08847357	0.961034
45	0.13944902	9.08258530	1.26655762		45.00000000	0.76311111	6.93102176	0.982414
46	0.14926836	9.08299450	1.35580369		46.00000000	0.74652174	6.78065285	1.003768
47	0.15937649	9.09043030	1.44880087		47.00000000	0.73063830	6.64181652	1.025137
48	0.16954789	9.08617500	1.54054180		48.00000000	0.71541667	6.50040103	1.046650
49	0.17938733	9.09356780	1.63127085		49.00000000	0.70081633	6.37292078	1.068029
50	0.18950887	9.07914920	1.72057931		50.00000000	0.68680000	6.23555967	1.089381
51	0.19931407	9.08588790	1.81094530		51.00000000	0.67333333	6.11783119	1.110762
52	0.20945346	9.08842660	1.90360240		52.00000000	0.66038462	6.00185710	1.132252
53	0.21927430	9.08066750	1.99115701		53.00000000	0.64792453	5.88358721	1.153641
54	0.22941965	9.08785720	2.08493302		54.00000000	0.63592593	5.77920400	1.175034
55	0.23925537	9.07990650	2.17241639		55.00000000	0.62436364	5.66916344	1.196382
56	0.24939774	9.08118530	2.26482709		56.00000000	0.61321429	5.56871256	1.217854
57	0.25955871	9.09643840	2.36105982		57.00000000	0.60245614	5.48020517	1.239217
58	0.26938403	9.07614040	2.44496728		58.00000000	0.59206897	5.37370106	1.260599
59	0.27952120	9.08224680	2.53868052		59.00000000	0.58203390	5.28617551	1.282087
60	0.28932863	9.08767510	2.62932459		60.00000000	0.57233333	5.20117938	1.303469
61	0.29948884	9.08082770	2.71960655		61.00000000	0.56295082	5.11205940	1.324814
62	0.30929035	9.07396410	2.80648953		62.00000000	0.55387097	5.02580528	1.346197
63	0.31942528	9.09650710	2.90565433		63.00000000	0.54507937	4.95831831	1.367689
64	0.32926100	9.06772040	2.98564669		64.00000000	0.53656250	4.86539873	1.389063
65	0.33939517	9.08949280	3.08492995		65.00000000	0.52830769	4.80204897	1.410422
66	0.34923238	9.08849330	3.17399615		66.00000000	0.52030303	4.72877060	1.431806
67	0.35935169	9.08071610	3.26317068		67.00000000	0.51253731	4.65420583	1.453284
68	0.36952382	9.08121870	3.35572662		68.00000000	0.50500000	4.58601544	1.474672
69	0.37935358	9.08255670	3.44550040		69.00000000	0.49768116	4.52021735	1.496028
70	0.38948926	9.09110160	3.54088643		70.00000000	0.49057143	4.45983470	1.517398
71	0.39931086	9.08288760	3.62689566		71.00000000	0.48366197	4.39304733	1.538883
72	0.40947926	9.07215310	3.71485854		72.00000000	0.47694444	4.32691302	1.560266
73	0.41928449	9.07604500	3.80544490		73.00000000	0.47041096	4.26947103	1.581622
74	0.42944026	9.09482480	3.90568393		74.00000000	0.46405405	4.22049032	1.603006
75	0.43925363	9.08498860	3.99061422		75.00000000	0.45786667	4.15971345	1.624489
76	0.44940346	9.07851790	4.07991736		76.00000000	0.45184211	4.10205664	1.645877
77	0.45953912	9.07773210	4.17157302		77.00000000	0.44597403	4.04843273	1.667219
78	0.46938005	9.05313300	4.24936002		78.00000000	0.44025641	3.98569984	1.688595
79	0.47956112	9.07331280	4.35120805		79.00000000	0.43468354	3.94401977	1.710069
80	0.48936188	9.04978750	4.42862102		80.00000000	0.42925000	3.88462128	1.731448
81	0.49949753	9.04450890	4.51770986		81.00000000	0.42395062	3.83442513	1.752803
82	0.50932956	9.02104470	4.59468473		82.00000000	0.41878049	3.77783750	1.774176
83	0.51947117	9.01620290	4.68365747		83.00000000	0.41373494	3.73031816	1.795653
84	0.52923989	8.96823220	4.74634622		84.00000000	0.40880952	3.66629874	1.817031
85	0.53937930	8.92519860	4.81406737		85.00000000	0.40400000	3.60578023	1.838419
86	0.54952019	8.87038330	4.87445472		86.00000000	0.39930233	3.54196468	1.859772
87	0.55936337	8.76723670	4.90407107		87.00000000	0.39471264	3.46053918	1.881243
88	0.56945360	8.64738080	4.92428213		88.00000000	0.39022727	3.37444383	1.902622
89	0.57929903	8.46288870	4.90254321		89.00000000	0.38584270	3.26534380	1.924004
90	0.58942503	8.21783730	4.84379900		90.00000000	0.38155556	3.13556148	1.945490
91	0.59921610	7.88871150	4.72704294		91.00000000	0.37736264	2.97690498	1.966869
92	0.60936815	7.41759110	4.52004377		92.00000000	0.37326087	2.76869650	1.988332
93	0.61916220	6.82115790	4.22340313		93.00000000	0.36924731	2.51869422	2.009746
94	0.62927032	6.01463890	3.78483375		94.00000000	0.36531915	2.19726276	2.031241
95	0.63934571	4.98014350	3.18403338		95.00000000	0.36147368	1.80019082	2.052635
96	0.64912784	3.72610860	2.41872083		96.00000000	0.35770833	1.33286010	2.073996
97	0.65926427	2.12209610	1.39902214		97.00000000	0.35402062	0.75126577	2.095369
98	0.66899133	0.26131576	0.17481798		98.00000000	0.35040816	0.09156718	2.116899
99	0.67906743	-1.99501420	-1.35474917		99.00000000	0.34686869	-0.69200796	2.138300
100	0.68879300	-4.53439430	-3.12325905		100.00000000	0.34340000	-1.55711100	2.159652
101	0.69901502	-7.57897520	-5.29781750		101.00000000	0.34000000	-2.57685157	2.181034
11:39 02/04/2018
Test Lot:	JK-PERC
Recipe:	Recipe_YJX-LID
Cell Name:	0
Test Order:	2
Test Condition:	Light
1	-0.29984248	9.09431840	-2.72686298		1.00000000	34.34000000	312.29889386	0.000000
2	-0.29006442	9.09557820	-2.63830362		2.00000000	17.17000000	156.17107769	0.061730
3	-0.27992761	9.09799290	-2.54677941		3.00000000	11.44666667	104.14169206	0.083257
4	-0.27008483	9.10421470	-2.45891028		4.00000000	8.58500000	78.15968320	0.104700
5	-0.25994727	9.09184170	-2.36339943		5.00000000	6.86800000	62.44276880	0.126074
6	-0.24978739	9.10560320	-2.27446486		6.00000000	5.72333333	52.11440231	0.147469
7	-0.23996544	9.10814950	-2.18564110		7.00000000	4.90571429	44.68197912	0.168954
8	-0.22981597	9.11486340	-2.09474117		8.00000000	4.29250000	39.12555114	0.190351
9	-0.22001486	9.08240320	-1.99826367		9.00000000	3.81555556	34.65441399	0.211705
10	-0.20984605	9.11565590	-1.91288438		10.00000000	3.43400000	31.30316236	0.233084
11	-0.20006874	9.07934570	-1.81649325		11.00000000	3.12181818	28.34406649	0.254559
12	-0.18989994	9.10960290	-1.72991304		12.00000000	2.86166667	26.06864697	0.275930
13	-0.18011221	9.09460070	-1.63804863		13.00000000	2.64153846	24.02373754	0.297306
14	-0.16996722	9.08880140	-1.54479831		14.00000000	2.45285714	22.29353143	0.318684
15	-0.16014676	9.09434700	-1.45643021		15.00000000	2.28933333	20.81999173	0.340170
16	-0.15000698	9.09354400	-1.36409507		16.00000000	2.14625000	19.51701881	0.361546
17	-0.13984710	9.08384130	-1.27034886		17.00000000	2.02000000	18.34935943	0.382922
18	-0.13002737	9.10812000	-1.18430489		18.00000000	1.90777778	17.37626893	0.404281
19	-0.11990099	9.09437660	-1.09042476		19.00000000	1.80736842	16.43688908	0.425766
20	-0.11006340	9.09749890	-1.00130166		20.00000000	1.71700000	15.62040561	0.447147
21	-0.09992138	9.08597280	-0.90788297		21.00000000	1.63523810	14.85772885	0.468527
22	-0.09010984	9.10729030	-0.82065647		22.00000000	1.56090909	14.21565222	0.489877
23	-0.07993805	9.09541320	-0.72706963		23.00000000	1.49304348	13.57984736	0.511356
24	-0.07012205	9.09486580	-0.63775062		24.00000000	1.43083333	13.01323715	0.532731
25	-0.05997855	9.09783650	-0.54567500		25.00000000	1.37360000	12.49678822	0.554123
26	-0.04983207	9.10167790	-0.45355540		26.00000000	1.32076923	12.02121612	0.575600
27	-0.04001383	9.09517480	-0.36393275		27.00000000	1.27185185	11.56771491	0.596973
28	-0.02984353	9.08792020	-0.27121562		28.00000000	1.22642857	11.14568499	0.618331
29	-0.02001115	9.10171990	-0.18213587		29.00000000	1.18413793	10.77769177	0.639710
30	-0.00987732	9.09336850	-0.08981813		30.00000000	1.14466667	10.40887581	0.661183
31	-0.00066793	9.10020450	-0.00607832		31.00000000	1.10774194	10.08067815	0.682683
32	0.00949323	9.09994410	0.08638783		32.00000000	1.07312500	9.76537751	0.704032
33	0.01931267	9.09648130	0.17567736		33.00000000	1.04060606	9.46585357	0.725397
34	0.02945961	9.09545800	0.26794864		34.00000000	1.01000000	9.18641258	0.746882
35	0.03927608	9.09821990	0.35734239		35.00000000	0.98114286	8.92665347	0.768266
36	0.04941929	9.09233090	0.44933655		36.00000000	0.95388889	8.67307342	0.789625
37	0.05924544	9.09799670	0.53901479		37.00000000	0.92810811	8.44392450	0.810992
38	0.06939237	9.08946700	0.63073964		38.00000000	0.90368421	8.21400781	0.832479
39	0.07953037	9.10380940	0.72402936		39.00000000	0.88051282	8.01602089	0.853874
40	0.08937661	9.09200190	0.81261234		40.00000000	0.85850000	7.80548363	0.875228
41	0.09952876	9.09600930	0.90531453		41.00000000	0.83756098	7.61846242	0.896602
42	0.10933258	9.09867760	0.99478190		42.00000000	0.81761905	7.43925211	0.918081
43	0.11949068	9.09961220	1.08731885		43.00000000	0.79860465	7.26699263	0.939466
44	0.12930715	9.09628110	1.17621418		44.00000000	0.78045455	7.09923393	0.960810
45	0.13943696	9.10149290	1.26908450		45.00000000	0.76311111	6.94545036	0.982188
46	0.14925417	9.10778620	1.35937507		46.00000000	0.74652174	6.79916039	1.003668
47	0.15940408	9.08490750	1.44817132		47.00000000	0.73063830	6.63778135	1.025037
48	0.16955401	9.08637140	1.54063071		48.00000000	0.71541667	6.50054154	1.046407
49	0.17938907	9.10259060	1.63290526		49.00000000	0.70081633	6.37924411	1.067769
50	0.18949656	9.09112260	1.72273646		50.00000000	0.68680000	6.24378300	1.089248
51	0.19928773	9.09627440	1.81277588		51.00000000	0.67333333	6.12482476	1.110634
52	0.20944062	9.08928200	1.90366486		52.00000000	0.66038462	6.00242200	1.132004
53	0.21926826	9.09541990	1.99433690		53.00000000	0.64792453	5.89314565	1.153357
54	0.22940774	9.09784320	2.08711565		54.00000000	0.63592593	5.78555436	1.174831
55	0.23923539	9.09352400	2.17549276		55.00000000	0.62436364	5.67766571	1.196205
56	0.24939720	9.09280300	2.26771961		56.00000000	0.61321429	5.57583670	1.217594
57	0.25952852	9.08915520	2.35889500		57.00000000	0.60245614	5.47581736	1.239073
58	0.26934424	9.09055040	2.44848739		58.00000000	0.59206897	5.38223277	1.260441
59	0.27949563	9.09970380	2.54332745		59.00000000	0.58203390	5.29633608	1.281790
60	0.28932327	9.08671670	2.62899859		60.00000000	0.57233333	5.20063086	1.303170
61	0.29951039	9.10963630	2.72843072		61.00000000	0.56295082	5.12827722	1.324644
62	0.30928221	9.09651280	2.81338958		62.00000000	0.55387097	5.03829435	1.346038
63	0.31945372	9.09496590	2.90542069		63.00000000	0.54507937	4.95747824	1.367387
64	0.32927760	9.09607410	2.99513345		64.00000000	0.53656250	4.88061226	1.388762
65	0.33941337	9.09313870	3.08633285		65.00000000	0.52830769	4.80397512	1.410242
66	0.34924847	9.08984280	3.17461369		66.00000000	0.52030303	4.72947275	1.431629
67	0.35938126	9.09872910	3.26991273		67.00000000	0.51253731	4.66343817	1.452987
68	0.36957508	9.09511760	3.36132881		68.00000000	0.50500000	4.59303439	1.474362
69	0.37936029	9.10622020	3.45453834		69.00000000	0.49768116	4.53199423	1.495845
70	0.38950351	9.08491610	3.53860671		70.00000000	0.49057143	4.45680027	1.517235
71	0.39932594	9.09908960	3.63350251		71.00000000	0.48366197	4.40088362	1.538588
72	0.40948701	9.08569240	3.72047301		72.00000000	0.47694444	4.33337051	1.559960
73	0.41930124	9.10268120	3.81676551		73.00000000	0.47041096	4.28200099	1.581449
74	0.42945933	9.08128830	3.90004399		74.00000000	0.46405405	4.21420865	1.602833
75	0.43930483	9.09525780	3.99559068		75.00000000	0.45786667	4.16441537	1.624170
76	0.44943094	9.09502120	4.08758393		76.00000000	0.45184211	4.10951353	1.645555
77	0.45955777	9.06716160	4.16688457		77.00000000	0.44597403	4.04371856	1.667031
78	0.46943527	9.07953740	4.26225509		78.00000000	0.44025641	3.99732454	1.688422
79	0.47956210	9.08055400	4.35468955		79.00000000	0.43468354	3.94716740	1.709777
80	0.48938379	9.07049940	4.43895537		80.00000000	0.42925000	3.89351187	1.731149
81	0.49952179	9.06260680	4.52696957		81.00000000	0.42395062	3.84209775	1.752620
82	0.50932932	9.04917340	4.60900933		82.00000000	0.41878049	3.78961725	1.774000
83	0.51947331	9.03222080	4.69199764		83.00000000	0.41373494	3.73694533	1.795371
84	0.52925551	8.97955610	4.75247954		84.00000000	0.40880952	3.67092805	1.816736
85	0.53939950	8.95393280	4.82974688		85.00000000	0.40400000	3.61738885	1.838214
86	0.54953748	8.88540360	4.88286230		86.00000000	0.39930233	3.54796232	1.859583
87	0.55938077	8.82089810	4.93424077		87.00000000	0.39471264	3.48172001	1.880965
88	0.56950015	8.69729710	4.95311200		88.00000000	0.39022727	3.39392253	1.902440
89	0.57930845	8.53981880	4.94718919		89.00000000	0.38584270	3.29502671	1.923890
90	0.58942783	8.31138040	4.89895891		90.00000000	0.38155556	3.17125337	1.945273
91	0.59925097	7.99685240	4.79212156		91.00000000	0.37736264	3.01771331	1.966645
92	0.60935700	7.55491110	4.60363796		92.00000000	0.37326087	2.81995269	1.988107
93	0.61915785	7.00832700	4.33926068		93.00000000	0.36924731	2.58780591	2.009622
94	0.62928241	6.21557710	3.91135334		94.00000000	0.36531915	2.27066934	2.031010
95	0.63939291	5.19951870	3.32453539		95.00000000	0.36147368	1.87948918	2.052433
96	0.64918703	3.92729400	2.54954833		96.00000000	0.35770833	1.40482579	2.073783
97	0.65926474	2.28298590	1.50509211		97.00000000	0.35402062	0.80822408	2.095298
98	0.66904849	0.30621737	0.20487427		98.00000000	0.35040816	0.10730107	2.116697
99	0.67910910	-2.14274950	-1.45516068		99.00000000	0.34686869	-0.74325271	2.138089
100	0.68879902	-4.96073870	-3.41695196		100.00000000	0.34340000	-1.70351767	2.159442
101	0.69903302	-8.44943710	-5.90643553		101.00000000	0.34000000	-2.87280861	2.180918
11:39 02/04/2018
Test Lot:	JK-PERC
Recipe:	Recipe_YJX-LID
Cell Name:	0
Test Order:	3
Test Condition:	Dark
1	-2.00038390	0.00605930		0.00000000	0.00000000
2	-1.99068190	0.00526255		0.00000000	0.00000000
3	-1.98054000	0.00521582		0.00000000	0.00000000
4	-1.97040120	0.00512234		0.00000000	0.00000000
5	-1.96057050	0.00519801		0.00000000	0.00000000
6	-1.95040550	0.00508006		0.00000000	0.00000000
7	-1.94057700	0.00514460		0.00000000	0.00000000
8	-1.93043290	0.00508006		0.00000000	0.00000000
9	-1.92065660	0.00508674		0.00000000	0.00000000
10	-1.91051610	0.00505113		0.00000000	0.00000000
11	-1.90071070	0.00500662		0.00000000	0.00000000
12	-1.89053760	0.00499326		0.00000000	0.00000000
13	-1.88040630	0.00485973		0.00000000	0.00000000
14	-1.87059560	0.00485528		0.00000000	0.00000000
15	-1.86048720	0.00471952		0.00000000	0.00000000
16	-1.85067070	0.00476181		0.00000000	0.00000000
17	-1.84050940	0.00478406		0.00000000	0.00000000
18	-1.83066530	0.00479964		0.00000000	0.00000000
19	-1.82055250	0.00470839		0.00000000	0.00000000
20	-1.81073590	0.00469949		0.00000000	0.00000000
21	-1.80057320	0.00471062		0.00000000	0.00000000
22	-1.79075440	0.00470617		0.00000000	0.00000000
23	-1.78060810	0.00467056		0.00000000	0.00000000
24	-1.77044990	0.00460602		0.00000000	0.00000000
25	-1.76057740	0.00457709		0.00000000	0.00000000
26	-1.75045570	0.00466833		0.00000000	0.00000000
27	-1.74060270	0.00467056		0.00000000	0.00000000
28	-1.73045410	0.00461270		0.00000000	0.00000000
29	-1.72063760	0.00471285		0.00000000	0.00000000
30	-1.71049800	0.00455928		0.00000000	0.00000000
31	-1.70066940	0.00464163		0.00000000	0.00000000
32	-1.69050370	0.00456151		0.00000000	0.00000000
33	-1.68038130	0.00457709		0.00000000	0.00000000
34	-1.67055270	0.00454370		0.00000000	0.00000000
35	-1.66039010	0.00449029		0.00000000	0.00000000
36	-1.65055940	0.00454816		0.00000000	0.00000000
37	-1.64042270	0.00450142		0.00000000	0.00000000
38	-1.63060320	0.00439237		0.00000000	0.00000000
39	-1.62045610	0.00440127		0.00000000	0.00000000
40	-1.61062610	0.00435453		0.00000000	0.00000000
41	-1.60048350	0.00435231		0.00000000	0.00000000
42	-1.59038340	0.00416536		0.00000000	0.00000000
43	-1.58057500	0.00430557		0.00000000	0.00000000
44	-1.57041000	0.00417427		0.00000000	0.00000000
45	-1.56057790	0.00416536		0.00000000	0.00000000
46	-1.55043380	0.00424548		0.00000000	0.00000000
47	-1.54060380	0.00413643		0.00000000	0.00000000
48	-1.53049700	0.00416314		0.00000000	0.00000000
49	-1.52070570	0.00404741		0.00000000	0.00000000
50	-1.51055260	0.00407189		0.00000000	0.00000000
51	-1.50074420	0.00406076		0.00000000	0.00000000
52	-1.49058900	0.00402070		0.00000000	0.00000000
53	-1.48045610	0.00389830		0.00000000	0.00000000
54	-1.47061260	0.00394281		0.00000000	0.00000000
55	-1.46045970	0.00394281		0.00000000	0.00000000
56	-1.45067290	0.00393391		0.00000000	0.00000000
57	-1.44049750	0.00393391		0.00000000	0.00000000
58	-1.43061100	0.00408079		0.00000000	0.00000000
59	-1.42047290	0.00400735		0.00000000	0.00000000
60	-1.41067270	0.00386492		0.00000000	0.00000000
61	-1.40050630	0.00388717		0.00000000	0.00000000
62	-1.39037110	0.00395839		0.00000000	0.00000000
63	-1.38052850	0.00388049		0.00000000	0.00000000
64	-1.37039780	0.00371580		0.00000000	0.00000000
65	-1.36056850	0.00384043		0.00000000	0.00000000
66	-1.35044300	0.00371803		0.00000000	0.00000000
67	-1.34060050	0.00377367		0.00000000	0.00000000
68	-1.33046970	0.00384711		0.00000000	0.00000000
69	-1.32064200	0.00371580		0.00000000	0.00000000
70	-1.31048230	0.00373583		0.00000000	0.00000000
71	-1.30033370	0.00366907		0.00000000	0.00000000
72	-1.29053580	0.00366017		0.00000000	0.00000000
73	-1.28037080	0.00373583		0.00000000	0.00000000
74	-1.27058180	0.00349993		0.00000000	0.00000000
75	-1.26044210	0.00358672		0.00000000	0.00000000
76	-1.25062930	0.00355111		0.00000000	0.00000000
77	-1.24047630	0.00353331		0.00000000	0.00000000
78	-1.23069180	0.00343316		0.00000000	0.00000000
79	-1.22051190	0.00342648		0.00000000	0.00000000
80	-1.21035220	0.00343539		0.00000000	0.00000000
81	-1.20054830	0.00342871		0.00000000	0.00000000
82	-1.19038710	0.00344874		0.00000000	0.00000000
83	-1.18058310	0.00339310		0.00000000	0.00000000
84	-1.17044500	0.00328628		0.00000000	0.00000000
85	-1.16058160	0.00335082		0.00000000	0.00000000
86	-1.15047920	0.00331521		0.00000000	0.00000000
87	-1.14065150	0.00326625		0.00000000	0.00000000
88	-1.13053560	0.00309488		0.00000000	0.00000000
89	-1.12069750	0.00320170		0.00000000	0.00000000
90	-1.11051540	0.00321283		0.00000000	0.00000000
91	-1.10034450	0.00323286		0.00000000	0.00000000
92	-1.09055470	0.00323286		0.00000000	0.00000000
93	-1.08038310	0.00313716		0.00000000	0.00000000
94	-1.07057250	0.00311713		0.00000000	0.00000000
95	-1.06041570	0.00313939		0.00000000	0.00000000
96	-1.05058660	0.00317500		0.00000000	0.00000000
97	-1.04046180	0.00305482		0.00000000	0.00000000
98	-1.03059690	0.00315719		0.00000000	0.00000000
99	-1.02043410	0.00313049		0.00000000	0.00000000
100	-1.01028340	0.00295022		0.00000000	0.00000000
101	-1.00046750	0.00296135		0.00000000	0.00000000
102	-0.99031895	0.00295244		0.00000000	0.00000000
103	-0.98048455	0.00300141		0.00000000	0.00000000
104	-0.97033596	0.00287233		0.00000000	0.00000000
105	-0.96054101	0.00274992		0.00000000	0.00000000
106	-0.95039243	0.00302144		0.00000000	0.00000000
107	-0.94062573	0.00277218		0.00000000	0.00000000
108	-0.93049729	0.00262974		0.00000000	0.00000000
109	-0.92030108	0.00276550		0.00000000	0.00000000
110	-0.91050088	0.00269651		0.00000000	0.00000000
111	-0.90030766	0.00284117		0.00000000	0.00000000
112	-0.89053798	0.00271654		0.00000000	0.00000000
113	-0.88038349	0.00262752		0.00000000	0.00000000
114	-0.87052077	0.00275882		0.00000000	0.00000000
115	-0.86039752	0.00259413		0.00000000	0.00000000
116	-0.85059655	0.00274992		0.00000000	0.00000000
117	-0.84045917	0.00259191		0.00000000	0.00000000
118	-0.83062327	0.00258078		0.00000000	0.00000000
119	-0.82050747	0.00252514		0.00000000	0.00000000
120	-0.81032985	0.00258301		0.00000000	0.00000000
121	-0.80049467	0.00252292		0.00000000	0.00000000
122	-0.79034239	0.00247618		0.00000000	0.00000000
123	-0.78051841	0.00253627		0.00000000	0.00000000
124	-0.77035791	0.00247173		0.00000000	0.00000000
125	-0.76055324	0.00238716		0.00000000	0.00000000
126	-0.75037938	0.00261416		0.00000000	0.00000000
127	-0.74058366	0.00260304		0.00000000	0.00000000
128	-0.73041946	0.00246728		0.00000000	0.00000000
129	-0.72027838	0.00249843		0.00000000	0.00000000
130	-0.71044987	0.00246728		0.00000000	0.00000000
131	-0.70029837	0.00249176		0.00000000	0.00000000
132	-0.69050115	0.00243389		0.00000000	0.00000000
133	-0.68032205	0.00226920		0.00000000	0.00000000
134	-0.67051739	0.00224472		0.00000000	0.00000000
135	-0.66038078	0.00233152		0.00000000	0.00000000
136	-0.65056270	0.00223137		0.00000000	0.00000000
137	-0.64041489	0.00218908		0.00000000	0.00000000
138	-0.63025516	0.00226030		0.00000000	0.00000000
139	-0.62047356	0.00221134		0.00000000	0.00000000
140	-0.61031532	0.00217796		0.00000000	0.00000000
141	-0.60049802	0.00216460		0.00000000	0.00000000
142	-0.59036362	0.00204888		0.00000000	0.00000000
143	-0.58051205	0.00211564		0.00000000	0.00000000
144	-0.57036573	0.00217128		0.00000000	0.00000000
145	-0.56055063	0.00211787		0.00000000	0.00000000
146	-0.55041552	0.00203107		0.00000000	0.00000000
147	-0.54056913	0.00217573		0.00000000	0.00000000
148	-0.53042507	0.00205555		0.00000000	0.00000000
149	-0.52030182	0.00202885		0.00000000	0.00000000
150	-0.51050758	0.00190644		0.00000000	0.00000000
151	-0.50035155	0.00186638		0.00000000	0.00000000
152	-0.49053872	0.00191979		0.00000000	0.00000000
153	-0.48036113	0.00186193		0.00000000	0.00000000
154	-0.47055721	0.00187973		0.00000000	0.00000000
155	-0.46042654	0.00188419		0.00000000	0.00000000
156	-0.45056680	0.00187973		0.00000000	0.00000000
157	-0.44041526	0.00193537		0.00000000	0.00000000
158	-0.43026894	0.00195540		0.00000000	0.00000000
159	-0.42043078	0.00195985		0.00000000	0.00000000
160	-0.41029859	0.00191757		0.00000000	0.00000000
161	-0.40045819	0.00194205		0.00000000	0.00000000
162	-0.39030889	0.00192425		0.00000000	0.00000000
163	-0.38051093	0.00191534		0.00000000	0.00000000
164	-0.37035939	0.00185525		0.00000000	0.00000000
165	-0.36053762	0.00182632		0.00000000	0.00000000
166	-0.35036153	0.00184858		0.00000000	0.00000000
167	-0.34021074	0.00190867		0.00000000	0.00000000
168	-0.33040085	0.00169947		0.00000000	0.00000000
169	-0.32023817	0.00188641		0.00000000	0.00000000
170	-0.31044096	0.00176623		0.00000000	0.00000000
171	-0.30029315	0.00178849		0.00000000	0.00000000
172	-0.29049072	0.00159487		0.00000000	0.00000000
173	-0.28035629	0.00148581		0.00000000	0.00000000
174	-0.27052110	0.00155703		0.00000000	0.00000000
175	-0.26038522	0.00149917		0.00000000	0.00000000
176	-0.25020912	0.00162602		0.00000000	0.00000000
177	-0.24042009	0.00161044		0.00000000	0.00000000
178	-0.23024102	0.00164605		0.00000000	0.00000000
179	-0.22039987	0.00156371		0.00000000	0.00000000
180	-0.21028183	0.00145466		0.00000000	0.00000000
181	-0.20044592	0.00143463		0.00000000	0.00000000
182	-0.19033457	0.00141460		0.00000000	0.00000000
183	-0.18052247	0.00137009		0.00000000	0.00000000
184	-0.17040443	0.00152810		0.00000000	0.00000000
185	-0.16058563	0.00145911		0.00000000	0.00000000
186	-0.15042442	0.00137231		0.00000000	0.00000000
187	-0.14027363	0.00144576		0.00000000	0.00000000
188	-0.13044886	0.00141460		0.00000000	0.00000000
189	-0.12026310	0.00152810		0.00000000	0.00000000
190	-0.11042941	0.00154813		0.00000000	0.00000000
191	-0.10026671	0.00148804		0.00000000	0.00000000
192	-0.09045162	0.00150807		0.00000000	0.00000000
193	-0.08034699	0.00145911		0.00000000	0.00000000
194	-0.07050138	0.00146356		0.00000000	0.00000000
195	-0.06035804	0.00148581		0.00000000	0.00000000
196	-0.05022140	0.00140124		0.00000000	0.00000000
197	-0.04038993	0.00141015		0.00000000	0.00000000
198	-0.03022277	0.00143018		0.00000000	0.00000000
199	-0.02041960	0.00132558		0.00000000	0.00000000
200	-0.01033506	0.00118982		0.00000000	0.00000000
201	-0.00115119	0.00097840		0.00000000	0.00000000
202	0.00904779	0.00115867		0.00000000	0.00000000
203	0.01890577	0.00131445		3.00561650	3.27010591
204	0.02908232	0.00137899		8.16559716	4.40964670
205	0.03885023	0.00122765		3.23187867	6.37348688
206	0.04900370	0.00127439		10.45238857	7.99343137
207	0.05883265	0.00116534		4.22609169	22.34519495
208	0.06896678	0.00117424		51.22028292	20.66867537
209	0.07911281	0.00108523		4.94986609	12.96733458
210	0.08895069	0.00117424		4.79953227	15.81867061
211	0.09910565	0.00119205		25.95507281	16.01310555
212	0.10889515	0.00115421		11.67418102	14.73996411
213	0.11906128	0.00112528		15.40292655	10.97666159
214	0.12888055	0.00122543		4.42974225	8.77777892
215	0.13903476	0.00116979		8.40520550	7.80341380
216	0.14886594	0.00123656		6.81250031	6.59693839
217	0.15903431	0.00114754		5.23465832	6.01001939
218	0.16914611	0.00105184		4.46643645	11.80276333
219	0.17898324	0.00102959		17.69256437	29.65000643
220	0.18912257	0.00103626		60.33390972	27.22474185
221	0.19893663	0.00107855		9.43809792	16.34838284
222	0.20906107	0.00114754		6.28040492	9.57195603
223	0.21890862	0.00102736		3.42378838	7.90799382
224	0.22902861	0.00098285		8.78813108	6.94273833
225	0.23888583	0.00105184		5.58858226	4.99940859
226	0.24902071	0.00088048		2.19200408	4.54368250
227	0.25916675	0.00094502		5.51665338	3.68679758
228	0.26896888	0.00075586		1.68791062	3.69147103
229	0.27914619	0.00082039		4.77741173	3.50948907
230	0.28897586	0.00071580		2.77197638	3.11300490
231	0.29909140	0.00062900		3.00991417	2.19664933
232	0.30889130	0.00035527		0.65980899	1.86188170
233	0.31908348	0.00042426		2.20890810	1.34212737
234	0.32886109	0.00017056		0.41267695	0.82199591
235	0.33904135	0.00017056		0.41267695	0.55472364
236	0.34887549	0.00006374		0.38425607	0.35258739
237	0.35896796	-0.00034130		0.02200082	0.58547617
238	0.36914152	-0.00048595		1.10735777	0.89096778
239	0.37898907	-0.00066844		1.18792229	0.93806942
240	0.38908821	-0.00107793		0.81287436	1.05792023
241	0.39891791	-0.00144291		1.29644383	1.18730081
242	0.40907064	-0.00196367		1.26719151	1.31999849
243	0.41890034	-0.00253338		1.48410191	1.42900647
244	0.42904040	-0.00328114		1.50792416	1.53409849
245	0.43884405	-0.00410902		1.67589713	1.54121940
246	0.44902059	-0.00533302		1.50116351	1.45885239
247	0.45914876	-0.00715346		1.32643893	1.43480292
248	0.46904472	-0.00926320		1.47265690	1.39647637
249	0.47915053	-0.01243449		1.32015102	1.36324407
250	0.48895791	-0.01644033		1.35072056	1.32785609
251	0.49912104	-0.02229776		1.28266186	1.28886870
252	0.50894928	-0.03014031		1.25427301	1.24333136
253	0.51905358	-0.04178173		1.18993272	1.20548271
254	0.52884310	-0.05759367		1.17312898	1.17717919
255	0.53902262	-0.08092992		1.15095097	1.15323356
256	0.54916495	-0.11429191		1.13013047	1.13281752
257	0.55898124	-0.16047703		1.11241941	1.11899404
258	0.56912130	-0.22823361		1.10727254	1.11201306
259	0.57897109	-0.32138723		1.10681718	1.11009158
260	0.58910966	-0.45674014		1.10947547	1.11193679
261	0.59892076	-0.64090204		1.11390883	1.11964149
262	0.60906309	-0.90532982		1.12931089	1.13299898
263	0.61889279	-1.25863170		1.14745684	1.15190623
264	0.62902766	-1.75540050		1.17173330	1.17827936
265	0.63914984	-2.42400880		1.20633300	1.21336222
266	0.64893490	-3.27443550		1.25147968	1.25462103
267	0.65904075	-4.42072920		1.29493474	1.30857306
268	0.66892773	-5.83883290		1.36675972	1.37676972
269	0.67912138	-7.65387730		1.44843135	1.45273824
270	0.68901587	-9.79968830		1.53985613	4.71226830
271	0.68982494	-10.00128000		1.52820470	120.94369097
272	0.68986213	-10.00111800		88.30593324	896.63085026
273	0.68981898	-10.00111100		2371.14335535	826.13894117
274	0.68981302	-10.00105100		38.20925818	415.24549209
275	0.68978399	-10.00120400		72.98459812	188.84006218
276	0.68978548	-10.00112400		7.16429536	94.13968316
277	0.68977952	-10.00120600		27.95822861	103.92595867
278	0.68976688	-10.00117600		162.07058235	176.80214999
279	0.68978697	-10.00110900		115.34038624	703.95037856
280	0.68977803	-10.00111100		1719.42160510	690.84087160
281	0.68978179	-10.00110200		160.70154031	582.37228381
282	0.68976986	-10.00110900		655.56697013	444.41672239
283	0.68978179	-10.00112900		229.44874936	238.75843069
284	0.68978101	-10.00104000		3.37115208	122.14224140
285	0.68975943	-10.00120000		51.88081000	78.99591580
286	0.68978924	-10.00097100		50.07261652	68.10178566
287	0.68981081	-10.00084600		66.37526041	81.83098009
288	0.68979365	-10.00093300		75.86881690	192.12697101
289	0.68974829	-10.00097800		387.72935167	236.76675424
290	0.68976688	-10.00094400		210.31432692	250.37380052
291	0.68978626	-10.00091900		298.18161914	194.61900626
292	0.68980855	-10.00080800		77.24159647	157.98210936
293	0.68978846	-10.00085900		151.52092385	165.13821744
294	0.68977207	-10.00085900		151.52092385	291.66654999
295	0.68975943	-10.00084900		486.19536378	435.21931594
296	0.68978399	-10.00086400		629.79752734	329.40086555
297	0.68977505	-10.00091700		64.88241006	183.09603045
298	0.68976611	-10.00091700		64.88241006	108.00880246
299	0.68978328	-10.00077700		47.17432500	90.36409278
300	0.68976241	-10.00086400		92.27105386	100.14084850
301	0.68977731	-10.00081700		121.94150855	91.71548580
302	0.68978477	-10.00085500		75.51238518	58.02084831
303	0.68978626	-10.00110600		2.28339886	60.52727802
304	0.68975276	-10.00124500		92.70597101	71.36810687
305	0.68978399	-10.00107300		69.84261976	92.17932208
306	0.68975049	-10.00116900		134.22978906	88.49296575
307	0.68976092	-10.00106400		38.20939381	151.52725254
308	0.68977654	-10.00108400		300.41687667	135.74605890
309	0.68977731	-10.00110000		18.51163664	177.19417674
310	0.68976760	-10.00111300		287.30989388	250.30608558
311	0.68978477	-10.00109300		330.22872791	248.73993095
312	0.68975347	-10.00114600		227.16621215	163.62961921
313	0.68975425	-10.00110200		6.81894818	183.10228996
314	0.68977433	-10.00107600		297.07376795	199.07723048
315	0.68972969	-10.00116900		184.63610769	163.49304798
316	0.68977058	-10.00103600		118.26057872	103.54200082
317	0.68975872	-10.00119300		29.05762322	60.44278532
318	0.68977135	-10.00101900		27.92085959	102.22665455
319	0.68978328	-10.00082400		23.53274033	656.07140445
320	0.68976986	-10.00082100		1720.65433146	665.81493373
321	0.68979222	-10.00086200		209.77374853	382.22027352
322	0.68978697	-10.00083900		87.80010891	257.84679800
323	0.68975794	-10.00089100		214.73750810	200.50011764
324	0.68977952	-10.00083300		143.11578380	154.87381873
325	0.68977058	-10.00086200		118.57768787	101.73543968
326	0.68978179	-10.00075200		39.19896730	53.31664359
327	0.68978328	-10.00085100		5.78911975	35.90449103
328	0.68978399	-10.00082600		10.92399282	108.24337123
329	0.68976092	-10.00086400		233.52175522	271.54556609
330	0.68978250	-10.00083300		267.76465341	1021.25954400
331	0.68979514	-10.00083500		2430.97195611	934.34641762
332	0.68976909	-10.00089900		156.56405370	497.17785577
333	0.68979293	-10.00081300		106.62808901	260.10965708
334	0.68979812	-10.00083700		83.17993871	161.19665885
335	0.68976688	-10.00095100		105.40753325	112.05529848
336	0.68975425	-10.00103600		57.15499905	124.68120576
337	0.68977803	-10.00109300		160.47592025	182.11011949
338	0.68976092	-10.00111600		286.15200332	137.49570191
339	0.68975943	-10.00104600		8.18769818	106.58997630
340	0.68973190	-10.00114400		108.05735689	155.87782854
341	0.68977207	-10.00104400		154.51690230	457.42032439
342	0.68979073	-10.00105100		1025.38212258	449.41965451
343	0.68976760	-10.00112400		121.87837402	470.47999572
344	0.68973488	-10.00110600		699.22325398	340.38595538
345	0.68973559	-10.00114300		7.38128731	271.42997394
346	0.68976539	-10.00110900		337.14203030	189.51720850
347	0.68976688	-10.00106900		14.32848328	195.11817032
348	0.68976313	-10.00106400		288.49230299	218.09869594
349	0.68974602	-10.00109300		226.94755059	187.50528337
350	0.68973708	-10.00111800		137.55366641	137.62858472
351	0.68975872	-10.00101100		77.79404593	116.22700180
352	0.68973488	-10.00092400		105.40365394	126.60305689
353	0.68974829	-10.00089300		166.39228657	91.63275659
354	0.68974829	-10.00085900		0.00000000	111.81015348
355	0.68976021	-10.00083500		191.04182092	125.69035993
356	0.68977952	-10.00077400		121.76263234	97.81895573
357	0.68978626	-10.00082600		49.85605917	89.70628916
358	0.68979073	-10.00080400		78.15322212	158.71900578
359	0.68974680	-10.00086200		291.33726373	171.33384028
360	0.68976313	-10.00081300		128.18969888	168.97598850
361	0.68974084	-10.00086600		161.76974779	228.93976908
362	0.68972892	-10.00087900		352.69349168	204.34786571
363	0.68976313	-10.00075400		105.27013306	163.68694271
364	0.68976688	-10.00076400		144.24171635	132.00413271
365	0.68974453	-10.00085300		96.59380725	102.61516933
366	0.68975645	-10.00078400		66.44913965	102.93525764
367	0.68973935	-10.00083300		134.23377186	83.77186444
368	0.68973935	-10.00104600		0.00000000	187.83435391
369	0.68975794	-10.00102900		420.63187135	203.05818824
370	0.68973190	-10.00112000		110.07099746	216.37865443
371	0.68974382	-10.00110200		254.72915195	291.38555519
372	0.68973708	-10.00109600		432.09876476	231.20259876
373	0.68973041	-10.00105100		57.01466688	180.15402173
374	0.68975127	-10.00100900		191.04531665	116.56941045
375	0.68975049	-10.00107300		4.68798797	178.72346290
376	0.68974233	-10.00109800		125.55208872	907.06691509
377	0.68970734	-10.00110400		2243.19566775	1047.72848586
378	0.68973118	-10.00109100		705.40285338	702.15654030
379	0.68970436	-10.00112900		271.48762167	404.27863107
380	0.68976611	-10.00096400		143.95445719	215.45631798
381	0.68974155	-10.00114300		52.77736870	120.67978380
382	0.68973637	-10.00106400		25.22186764	173.51924242
383	0.68971550	-10.00104000		334.49031290	156.04233433
384	0.68972969	-10.00094900		59.98060522	100.02365628
385	0.68975425	-10.00074800		46.99977787	85.15793967
386	0.68974602	-10.00079400		68.81801449	147.63561064
387	0.68976760	-10.00082400		276.68904902	139.72043553
388	0.68975276	-10.00090600		69.61202467	106.69216585
389	0.68974006	-10.00082800		62.62870360	170.64816393
390	0.68977433	-10.00077700		258.46719584	350.27659186
391	0.68978924	-10.00076800		637.22870930	351.86536804
392	0.68975347	-10.00082800		229.31316953	254.96808128
393	0.68977135	-10.00077700		134.85245000	221.79982682
394	0.68975645	-10.00075400		249.18295308	150.09723602
395	0.68975723	-10.00074100		23.07864807	109.00089388
396	0.68972671	-10.00089700		75.25271101	227.77011119
397	0.68974453	-10.00087700		342.72270446	625.00706834
398	0.68971699	-10.00086900		1324.15405008	545.70469839
399	0.68974751	-10.00075400		102.08186187	248.05694468
400	0.68973041	-10.00092600		38.24113685	38.24113685
401	0.68972892	-10.00106200		4.21421976	4.21421976
