# Supplementary material for: Study on the Electrical Injection Regeneration of Industrialized B-Doped Czochralski Silicon PERC Solar Cells
Source: Hindawi journal article supplement (doi:10.1155/2019/5357370), 2019-06-20
Supplement: f1 [file 5357370.f1.zip › section3.2/IVRawData_1-0-1.5h.csv]

15:00 02/04/2018
Test Lot:	JK-PERC
Recipe:	Recipe_YJX-LID
Cell Name:	1-0-1.5h
Test Order:	2
Test Condition:	Light
1	-0.29992115	8.68767260	-2.60561676		1.00000000	34.34000000	298.33467708	0.000000
2	-0.29011089	8.68478010	-2.51954928		2.00000000	17.17000000	149.11767432	0.061727
3	-0.27997908	8.70473860	-2.43714470		3.00000000	11.44666667	99.64024117	0.083260
4	-0.27015018	8.69001670	-2.34760958		4.00000000	8.58500000	74.60379337	0.104640
5	-0.26003477	8.68485360	-2.25836391		5.00000000	6.86800000	59.64757452	0.125986
6	-0.24986500	8.70959190	-2.17622218		6.00000000	5.72333333	49.84789764	0.147371
7	-0.24003536	8.67617510	-2.08258881		7.00000000	4.90571429	42.56283613	0.168863
8	-0.22989686	8.70590690	-2.00146066		8.00000000	4.29250000	37.37010537	0.190250
9	-0.22008061	8.68931770	-1.91235034		9.00000000	3.81555556	33.15457442	0.211604
10	-0.20987512	8.70841310	-1.82767924		10.00000000	3.43400000	29.90469059	0.233037
11	-0.20010504	8.70114230	-1.74114243		11.00000000	3.12181818	27.16338423	0.254533
12	-0.18993305	8.70112900	-1.65263197		12.00000000	2.86166667	24.89973082	0.275906
13	-0.18014732	8.70422270	-1.56804239		13.00000000	2.64153846	22.99253904	0.297261
14	-0.17002220	8.68890760	-1.47730719		14.00000000	2.45285714	21.31264907	0.318647
15	-0.16017918	8.69774720	-1.39319801		15.00000000	2.28933333	19.91204259	0.340131
16	-0.15003845	8.69359210	-1.30437308		16.00000000	2.14625000	18.65862204	0.361519
17	-0.13989101	8.69763090	-1.21672037		17.00000000	2.02000000	17.56921442	0.382878
18	-0.13005839	8.69583510	-1.13096631		18.00000000	1.90777778	16.58972096	0.404249
19	-0.11988863	8.69743350	-1.04272339		19.00000000	1.80736842	15.71946665	0.425747
20	-0.11009026	8.70104030	-0.95789979		20.00000000	1.71700000	14.93968620	0.447139
21	-0.09994134	8.69258690	-0.86874875		21.00000000	1.63523810	14.21444925	0.468517
22	-0.09014817	8.70250030	-0.78451450		22.00000000	1.56090909	13.58381183	0.489890
23	-0.07996055	8.68425940	-0.69439813		23.00000000	1.49304348	12.96597686	0.511382
24	-0.07014133	8.69308760	-0.60974473		24.00000000	1.43083333	12.43835951	0.532763
25	-0.06002143	8.69000530	-0.52158658		25.00000000	1.37360000	11.93659128	0.554149
26	-0.04988293	8.68717190	-0.43334155		26.00000000	1.32076923	11.47374935	0.575493
27	-0.04004883	8.71086980	-0.34886014		27.00000000	1.27185185	11.07893589	0.596964
28	-0.02991181	8.68544100	-0.25979728		28.00000000	1.22642857	10.65207300	0.618358
29	-0.02007697	8.69635580	-0.17459647		29.00000000	1.18413793	10.29768476	0.639742
30	-0.00998386	8.69538120	-0.08681351		30.00000000	1.14466667	9.95331301	0.661214
31	-0.00067895	8.70138550	-0.00590777		31.00000000	1.10774194	9.63888962	0.682725
32	0.00947721	8.70084190	0.08245975		32.00000000	1.07312500	9.33709096	0.704080
33	0.01930136	8.68386080	0.16761030		33.00000000	1.04060606	9.03647818	0.725475
34	0.02943288	8.69745540	0.25599113		34.00000000	1.01000000	8.78442995	0.746967
35	0.03925553	8.68385410	0.34088930		35.00000000	0.98114286	8.52010142	0.768344
36	0.04939896	8.69369220	0.42945931		36.00000000	0.95388889	8.29281639	0.789716
37	0.05923947	8.69131850	0.51486909		37.00000000	0.92810811	8.06648317	0.811093
38	0.06938439	8.68656060	0.60271170		38.00000000	0.90368421	7.84990766	0.832578
39	0.07953525	8.69276910	0.69138159		39.00000000	0.88051282	7.65409464	0.853975
40	0.08934005	8.69145390	0.77649489		40.00000000	0.85850000	7.46161317	0.875329
41	0.09948273	8.69877530	0.86537791		41.00000000	0.83756098	7.28575473	0.896708
42	0.10933292	8.69382570	0.95052135		42.00000000	0.81761905	7.10823749	0.918198
43	0.11949644	8.69093990	1.03853638		43.00000000	0.79860465	6.94062503	0.939571
44	0.12930347	8.68499370	1.12299982		44.00000000	0.78045455	6.77824281	0.960916
45	0.13946326	8.69335460	1.21240357		45.00000000	0.76311111	6.63399549	0.982308
46	0.14927550	8.68439290	1.29636709		46.00000000	0.74652174	6.48308809	1.003787
47	0.15941074	8.68506050	1.38449192		47.00000000	0.73063830	6.34563782	1.025164
48	0.16954970	8.68771080	1.47299876		48.00000000	0.71541667	6.21533310	1.046539
49	0.17937385	8.68945120	1.55866032		49.00000000	0.70081633	6.08970927	1.067913
50	0.18953216	8.68337630	1.64577907		50.00000000	0.68680000	5.96374284	1.089393
51	0.19932057	8.69454960	1.73300258		51.00000000	0.67333333	5.85433006	1.110774
52	0.20944168	8.68872360	1.81978087		52.00000000	0.66038462	5.73789939	1.132135
53	0.21928442	8.71041770	1.91005889		53.00000000	0.64792453	5.64369328	1.153508
54	0.22942337	8.67508890	1.99026813		54.00000000	0.63592593	5.51671394	1.174989
55	0.23925571	8.69045070	2.07923995		55.00000000	0.62436364	5.42600140	1.196360
56	0.24942444	8.68785950	2.16696449		56.00000000	0.61321429	5.32751956	1.217761
57	0.25955075	8.68437100	2.25403501		57.00000000	0.60245614	5.23195263	1.239120
58	0.26938307	8.69452670	2.34215829		58.00000000	0.59206897	5.14775943	1.260595
59	0.27949524	8.68792250	2.42823298		59.00000000	0.58203390	5.05666540	1.281995
60	0.28932536	8.68531230	2.51288111		60.00000000	0.57233333	4.97089374	1.303398
61	0.29946133	8.69917580	2.60506675		61.00000000	0.56295082	4.89720815	1.324876
62	0.30927432	8.67353150	2.68250056		62.00000000	0.55387097	4.80401729	1.346268
63	0.31943485	8.69671440	2.77803366		63.00000000	0.54507937	4.74039956	1.367610
64	0.32925528	8.68477340	2.85950750		64.00000000	0.53656250	4.65992373	1.388980
65	0.33941880	8.69703290	2.95193647		65.00000000	0.52830769	4.59470938	1.410474
66	0.34922358	8.68176270	3.03187625		66.00000000	0.52030303	4.51714744	1.431848
67	0.35937297	8.69254400	3.12386535		67.00000000	0.51253731	4.45525315	1.453210
68	0.36952531	8.67833330	3.20686380		68.00000000	0.50500000	4.38255832	1.474590
69	0.37936509	8.68762590	3.29578198		69.00000000	0.49768116	4.32366773	1.496076
70	0.38949808	8.68265720	3.38187831		70.00000000	0.49057143	4.25946355	1.517474
71	0.39933491	8.67285440	3.46337353		71.00000000	0.48366197	4.19472986	1.538828
72	0.40948948	8.68072130	3.55466405		72.00000000	0.47694444	4.14022180	1.560203
73	0.41929054	8.66875840	3.63472839		73.00000000	0.47041096	4.07787895	1.581689
74	0.42946002	8.66561410	3.72153480		74.00000000	0.46405405	4.02131335	1.603066
75	0.43926927	8.66242500	3.80513711		75.00000000	0.45786667	3.96623566	1.624416
76	0.44941568	8.67036250	3.89659686		76.00000000	0.45184211	3.91763485	1.645802
77	0.45956507	8.65491680	3.97749745		77.00000000	0.44597403	3.85986809	1.667282
78	0.46943685	8.64812090	4.05974663		78.00000000	0.44025641	3.80739066	1.688649
79	0.47955573	8.62738510	4.13731196		79.00000000	0.43468354	3.75018233	1.710007
80	0.48936868	8.61505700	4.21593907		80.00000000	0.42925000	3.69801322	1.731389
81	0.49952477	8.58493330	4.28838683		81.00000000	0.42395062	3.63958777	1.752866
82	0.50934148	8.53901390	4.34927398		82.00000000	0.41878049	3.57597241	1.774247
83	0.51945961	8.48352810	4.40685020		83.00000000	0.41373494	3.50993199	1.795613
84	0.52924055	8.38575080	4.43807937		84.00000000	0.40880952	3.42817479	1.816992
85	0.53936166	8.26223370	4.45633208		85.00000000	0.40400000	3.33794241	1.838475
86	0.54952741	8.07623000	4.43810975		86.00000000	0.39930233	3.22485742	1.859853
87	0.55932772	7.84305190	4.38683634		87.00000000	0.39471264	3.09575175	1.881238
88	0.56943619	7.48623180	4.26293131		88.00000000	0.39022727	2.92133182	1.902588
89	0.57924843	7.02020310	4.06644162		89.00000000	0.38584270	2.70869409	1.924060
90	0.58935910	6.36966130	3.75401785		90.00000000	0.38155556	2.43037966	1.945455
91	0.59914452	5.54286960	3.32097995		91.00000000	0.37736264	2.09167189	1.966841
92	0.60925227	4.44995400	2.71114458		92.00000000	0.37326087	1.66099370	1.988460
93	0.61905181	3.13308000	1.93953884		93.00000000	0.36924731	1.15688137	2.009870
94	0.62918484	1.46194280	0.91983225		94.00000000	0.36531915	0.53407570	2.031226
95	0.63923448	-0.51491618	-0.32915218		95.00000000	0.36147368	-0.18612865	2.052617
96	0.64899534	-2.74541810	-1.78176355		96.00000000	0.35770833	-0.98205893	2.074101
97	0.65903234	-5.40213350	-3.56018068		97.00000000	0.35402062	-1.91246664	2.095489
98	0.66896594	-8.33352660	-5.57484546		98.00000000	0.35040816	-2.92013575	2.116853
99	0.67408562	-9.99903870	-6.74020820		99.00000000	0.34686869	-3.46835342	2.138234
100	0.67405361	-9.99988170	-6.74045636		100.00000000	0.34340000	-3.43395938	2.159718
101	0.67405212	-9.99984840	-6.74041901		101.00000000	0.34000000	-3.39994846	2.181112
15:00 02/04/2018
Test Lot:	JK-PERC
Recipe:	Recipe_YJX-LID
Cell Name:	1-0-1.5h
Test Order:	3
Test Condition:	Light
1	-0.29996732	8.69080830	-2.60695847		1.00000000	34.34000000	298.44235702	0.000000
2	-0.29005730	8.68514060	-2.51918843		2.00000000	17.17000000	149.12386410	0.021594
3	-0.27996418	8.69616890	-2.43461580		3.00000000	11.44666667	99.54214668	0.042994
4	-0.27013755	8.68681140	-2.34663395		4.00000000	8.58500000	74.57627587	0.064353
5	-0.25999755	8.69672780	-2.26112792		5.00000000	6.86800000	59.72912653	0.085760
6	-0.24989477	8.69399550	-2.17258401		6.00000000	5.72333333	49.75863425	0.107246
7	-0.24005546	8.67620180	-2.08276961		7.00000000	4.90571429	42.56296712	0.128622
8	-0.22989388	8.68901440	-1.99755123		8.00000000	4.29250000	37.29759431	0.149962
9	-0.22004639	8.68511200	-1.91112754		9.00000000	3.81555556	33.13852734	0.171341
10	-0.20989597	8.67694470	-1.82125572		10.00000000	3.43400000	29.79662810	0.192827
11	-0.20007378	8.69213490	-1.73906829		11.00000000	3.12181818	27.13526477	0.214210
12	-0.18997547	8.68014050	-1.64901377		12.00000000	2.86166667	24.83966873	0.235570
13	-0.18016072	8.69102860	-1.56578197		13.00000000	2.64153846	22.95768632	0.256950
14	-0.17003933	8.69200990	-1.47798354		14.00000000	2.45285714	21.32025857	0.278432
15	-0.16018885	8.68245890	-1.39083311		15.00000000	2.28933333	19.87704258	0.299816
16	-0.15004663	8.68486210	-1.30313429		16.00000000	2.14625000	18.63988528	0.321215
17	-0.13988431	8.69875910	-1.21681991		17.00000000	2.02000000	17.57149338	0.342591
18	-0.13012017	8.67683600	-1.12903138		18.00000000	1.90777778	16.55347490	0.364065
19	-0.11995339	8.69652560	-1.04317773		19.00000000	1.80736842	15.71782574	0.385443
20	-0.11010068	8.68507580	-0.95623275		20.00000000	1.71700000	14.91227515	0.406838
21	-0.09996515	8.68950460	-0.86864761		21.00000000	1.63523810	14.20940895	0.428180
22	-0.09017497	8.68891720	-0.78352281		22.00000000	1.56090909	13.56260985	0.449656
23	-0.07998734	8.69668100	-0.69562438		23.00000000	1.49304348	12.98452285	0.471039
24	-0.07018152	8.69131850	-0.60996993		24.00000000	1.43083333	12.43582822	0.492429
25	-0.06002664	8.69507690	-0.52193627		25.00000000	1.37360000	11.94355763	0.513914
26	-0.04989260	8.69219490	-0.43367621		26.00000000	1.32076923	11.48038357	0.535299
27	-0.04005702	8.68335340	-0.34782922		27.00000000	1.27185185	11.04393910	0.556653
28	-0.02990883	8.69702820	-0.26011797		28.00000000	1.22642857	10.66628387	0.578026
29	-0.02007548	8.69032380	-0.17446243		29.00000000	1.18413793	10.29054204	0.599494
30	-0.00991911	8.68840690	-0.08618129		30.00000000	1.14466667	9.94532976	0.620871
31	-0.00063801	8.68201450	-0.00553922		31.00000000	1.10774194	9.61743155	0.642342
32	0.00949210	8.68166450	0.08240722		32.00000000	1.07312500	9.31651122	0.663715
33	0.01930285	8.69604020	0.16785832		33.00000000	1.04060606	9.04915214	0.685195
34	0.02945446	8.67667580	0.25556679		34.00000000	1.01000000	8.76344256	0.706594
35	0.03929497	8.70328330	0.34199528		35.00000000	0.98114286	8.53916424	0.727942
36	0.04944733	8.68238160	0.42932061		36.00000000	0.95388889	8.28202734	0.749308
37	0.05928562	8.69277100	0.51535627		37.00000000	0.92810811	8.06783125	0.770798
38	0.06941118	8.68579960	0.60289161		38.00000000	0.90368421	7.84921995	0.792174
39	0.07955238	8.68864730	0.69120253		39.00000000	0.88051282	7.65046534	0.813525
40	0.08937801	8.68798920	0.77651516		40.00000000	0.85850000	7.45863873	0.834913
41	0.09953036	8.70710660	0.86662147		41.00000000	0.83756098	7.29273270	0.856388
42	0.10933515	8.68511580	0.94958844		42.00000000	0.81761905	7.10111611	0.877778
43	0.11950463	8.68530940	1.03793469		43.00000000	0.79860465	6.93612848	0.899120
44	0.12932505	8.67196660	1.12150251		44.00000000	0.78045455	6.76807575	0.920491
45	0.13947071	8.69203470	1.21228425		45.00000000	0.76311111	6.63298826	0.941967
46	0.14925541	8.69650080	1.29799979		46.00000000	0.74652174	6.49212690	0.963341
47	0.15941669	8.68349650	1.38429427		47.00000000	0.73063830	6.34449510	0.984736
48	0.16955639	8.68183610	1.47206079		48.00000000	0.71541667	6.21113024	1.006112
49	0.17935300	8.69784930	1.55998537		49.00000000	0.70081633	6.09559480	1.027601
50	0.18952769	8.68190770	1.64546191		50.00000000	0.68680000	5.96273421	1.048981
51	0.19929452	8.68776890	1.73142473		51.00000000	0.67333333	5.84976439	1.070376
52	0.20944390	8.68677140	1.81939128		52.00000000	0.66038462	5.73661019	1.091739
53	0.21925986	8.68232820	1.90368607		53.00000000	0.64792453	5.62549340	1.113221
54	0.22941892	8.69199660	1.99410847		54.00000000	0.63592593	5.52746599	1.134608
55	0.23924083	8.67907910	2.07639009		55.00000000	0.62436364	5.41890139	1.155982
56	0.24937829	8.68899440	2.16684657		56.00000000	0.61321429	5.32821549	1.177467
57	0.25954852	8.68331810	2.25374236		57.00000000	0.60245614	5.23131831	1.198845
58	0.26936969	8.69237520	2.34146241		58.00000000	0.59206897	5.14648559	1.220191
59	0.27950940	8.67131710	2.42371464		59.00000000	0.58203390	5.04700050	1.241563
60	0.28934246	8.68555450	2.51309971		60.00000000	0.57233333	4.97103236	1.263042
61	0.29947993	8.68777280	2.60181359		61.00000000	0.56295082	4.89078882	1.284421
62	0.30930704	8.67551800	2.68339879		62.00000000	0.55387097	4.80511755	1.305782
63	0.31943485	8.70045760	2.77922937		63.00000000	0.54507937	4.74243990	1.327156
64	0.32928208	8.68154050	2.85867571		64.00000000	0.53656250	4.65818907	1.348643
65	0.33944038	8.68068120	2.94657373		65.00000000	0.52830769	4.58607065	1.370022
66	0.34924665	8.69105340	3.03532128		66.00000000	0.52030303	4.52198142	1.391374
67	0.35940495	8.68376730	3.12098895		67.00000000	0.51253731	4.45075476	1.412750
68	0.36952457	8.67319490	3.20495862		68.00000000	0.50500000	4.37996342	1.434234
69	0.37938297	8.68033890	3.29317275		69.00000000	0.49768116	4.32004113	1.455617
70	0.38951671	8.67769720	3.38010806		70.00000000	0.49057143	4.25703031	1.476973
71	0.39933342	8.67677310	3.46492548		71.00000000	0.48366197	4.19662519	1.498343
72	0.40949842	8.67829800	3.55374932		72.00000000	0.47694444	4.13906602	1.519829
73	0.41931659	8.66965480	3.63533009		73.00000000	0.47041096	4.07830063	1.541214
74	0.42946002	8.67294120	3.72468150		74.00000000	0.46405405	4.02471352	1.562551
75	0.43928194	8.66485020	3.80631221		75.00000000	0.45786667	3.96734608	1.583922
76	0.44943875	8.66757010	3.89554187		76.00000000	0.45184211	3.91637312	1.605389
77	0.45956358	8.64668940	3.97370354		77.00000000	0.44597403	3.85619888	1.626767
78	0.46941525	8.64889240	4.05992199		78.00000000	0.44025641	3.80773032	1.648119
79	0.47954008	8.62607000	4.13654630		79.00000000	0.43468354	3.74961068	1.669486
80	0.48937464	8.61228660	4.21463465		80.00000000	0.42925000	3.69682402	1.690964
81	0.49951956	8.57483670	4.28329866		81.00000000	0.42395062	3.63530731	1.712338
82	0.50933325	8.53753660	4.34845126		82.00000000	0.41878049	3.57535374	1.733724
83	0.51945436	8.47928240	4.40460021		83.00000000	0.41373494	3.50817539	1.755069
84	0.52923238	8.39743140	4.44419261		84.00000000	0.40880952	3.43294993	1.776536
85	0.53936017	8.25559810	4.45274079		85.00000000	0.40400000	3.33526163	1.797904
86	0.54951477	8.06598470	4.43237773		86.00000000	0.39930233	3.22076645	1.819281
87	0.55932176	7.84405760	4.38735210		87.00000000	0.39471264	3.09614871	1.840771
88	0.56943172	7.48393300	4.26158884		88.00000000	0.39022727	2.92043476	1.862151
89	0.57924914	7.01909920	4.06580718		89.00000000	0.38584270	2.70826816	1.883501
90	0.58935165	6.35738230	3.74673375		90.00000000	0.38155556	2.42569454	1.904884
91	0.59914601	5.54243140	3.32072566		91.00000000	0.37736264	2.09150653	1.926362
92	0.60924035	4.44550560	2.70838139		92.00000000	0.37326087	1.65933329	1.947751
93	0.61904663	3.13541440	1.94096772		93.00000000	0.36924731	1.15774334	1.969102
94	0.62914538	1.46549210	0.92200758		94.00000000	0.36531915	0.53537233	1.990573
95	0.63922107	-0.53059959	-0.33917044		95.00000000	0.36147368	-0.19179779	2.012103
96	0.64899534	-2.74511310	-1.78156561		96.00000000	0.35770833	-0.98194983	2.033497
97	0.65903312	-5.40907380	-3.56475878		97.00000000	0.35402062	-1.91492365	2.054847
98	0.66899347	-8.35064510	-5.58652704		98.00000000	0.35040816	-2.92613421	2.076221
99	0.67405587	-9.99882510	-6.73976675		99.00000000	0.34686869	-3.46827933	2.097713
100	0.67401862	-9.99966620	-6.73996121		100.00000000	0.34340000	-3.43388537	2.119088
101	0.67401195	-9.99964140	-6.73987780		101.00000000	0.34000000	-3.39987808	2.140444
15:00 02/04/2018
Test Lot:	JK-PERC
Recipe:	Recipe_YJX-LID
Cell Name:	1-0-1.5h
Test Order:	4
Test Condition:	Light
1	-0.29995269	8.69362450	-2.60767605		1.00000000	34.34000000	298.53906533	0.000000
2	-0.29011711	8.67961690	-2.51810537		2.00000000	17.17000000	149.02902217	0.061735
3	-0.27998233	8.69765660	-2.43519016		3.00000000	11.44666667	99.55917588	0.083130
4	-0.27017134	8.68168640	-2.34554285		4.00000000	8.58500000	74.53227774	0.104624
5	-0.25997552	8.70464710	-2.26299516		5.00000000	6.86800000	59.78351628	0.126018
6	-0.24980430	8.67511940	-2.16708213		6.00000000	5.72333333	49.65060003	0.147385
7	-0.24000818	8.69572350	-2.08704477		7.00000000	4.90571429	42.65873500	0.168790
8	-0.22986001	8.68337540	-1.99596076		8.00000000	4.29250000	37.27338890	0.190280
9	-0.22002295	8.70139980	-1.91450765		9.00000000	3.81555556	33.20067435	0.211655
10	-0.20989712	8.68652150	-1.82327585		10.00000000	3.43400000	29.82951483	0.233068
11	-0.20005335	8.69913200	-1.74029050		11.00000000	3.12181818	27.15710844	0.254417
12	-0.18991487	8.68738940	-1.64986443		12.00000000	2.86166667	24.86041267	0.275891
13	-0.18012470	8.68159010	-1.56376881		13.00000000	2.64153846	22.93275416	0.297263
14	-0.17000481	8.68645290	-1.47673877		14.00000000	2.45285714	21.30662804	0.318649
15	-0.16014171	8.68777280	-1.39127479		15.00000000	2.28933333	19.88920786	0.340132
16	-0.15001439	8.69745640	-1.30474362		16.00000000	2.14625000	18.66691580	0.361533
17	-0.13991311	8.69299980	-1.21626464		17.00000000	2.02000000	17.55985960	0.382879
18	-0.13003586	8.69038960	-1.13006229		18.00000000	1.90777778	16.57933216	0.404245
19	-0.11990332	8.68973260	-1.04192779		19.00000000	1.80736842	15.70554829	0.425732
20	-0.11009528	8.69544700	-0.95732767		20.00000000	1.71700000	14.93008250	0.447110
21	-0.09994414	8.68845080	-0.86835978		21.00000000	1.63523810	14.20768574	0.468457
22	-0.09011006	8.68835070	-0.78290784		22.00000000	1.56090909	13.56172559	0.489846
23	-0.07998200	8.69217870	-0.69521782		23.00000000	1.49304348	12.97780072	0.511329
24	-0.07015684	8.69134810	-0.60975754		24.00000000	1.43083333	12.43587057	0.532697
25	-0.05999900	8.67567350	-0.52053177		25.00000000	1.37360000	11.91690512	0.554051
26	-0.04983893	8.69879440	-0.43353861		26.00000000	1.32076923	11.48909999	0.575419
27	-0.04004430	8.69567680	-0.34821226		27.00000000	1.27185185	11.05961264	0.596893
28	-0.02988645	8.68155000	-0.25946074		28.00000000	1.22642857	10.64730096	0.618280
29	-0.02003302	8.68831540	-0.17405321		29.00000000	1.18413793	10.28816382	0.639620
30	-0.00995482	8.69165800	-0.08652388		30.00000000	1.14466667	9.94905119	0.661045
31	-0.00064545	8.68668370	-0.00560682		31.00000000	1.10774194	9.62260381	0.682646
32	0.00951367	8.69332700	0.08270546		32.00000000	1.07312500	9.32902654	0.704023
33	0.01931845	8.68702510	0.16781983		33.00000000	1.04060606	9.03977097	0.725383
34	0.02947079	8.68358420	0.25591207		34.00000000	1.01000000	8.77042004	0.746758
35	0.03927035	8.68909650	0.34122389		35.00000000	0.98114286	8.52524497	0.768233
36	0.04943758	8.68338870	0.42928571		36.00000000	0.95388889	8.28298800	0.789621
37	0.05928031	8.68182180	0.51466112		37.00000000	0.92810811	8.05766921	0.810986
38	0.06942745	8.69338890	0.60355979		38.00000000	0.90368421	7.85607828	0.832340
39	0.07957234	8.67835240	0.69055683		39.00000000	0.88051282	7.64140055	0.853819
40	0.08941210	8.68722530	0.77674307		40.00000000	0.85850000	7.45798292	0.875187
41	0.09955625	8.69008450	0.86515224		41.00000000	0.83756098	7.27847565	0.896559
42	0.10936178	8.69145770	0.95051328		42.00000000	0.81761905	7.10630137	0.917925
43	0.11951932	8.68976400	1.03859468		43.00000000	0.79860465	6.93968595	0.939390
44	0.12933972	8.69363120	1.12443183		44.00000000	0.78045455	6.78498399	0.960765
45	0.13947941	8.67890640	1.21052874		45.00000000	0.76311111	6.62296991	0.982155
46	0.14928271	8.69292640	1.29770361		46.00000000	0.74652174	6.48945853	1.003626
47	0.15944695	8.67330360	1.38293181		47.00000000	0.73063830	6.33704778	1.025020
48	0.16959557	8.68851570	1.47353377		48.00000000	0.71541667	6.21590894	1.046366
49	0.17940705	8.69077870	1.55918697		49.00000000	0.70081633	6.09063960	1.067735
50	0.18957129	8.69136620	1.64763350		50.00000000	0.68680000	5.96923031	1.089213
51	0.19932324	8.68412690	1.73094831		51.00000000	0.67333333	5.84731211	1.110591
52	0.20948748	8.68499280	1.81939726		52.00000000	0.66038462	5.73543563	1.131935
53	0.21929598	8.67803000	1.90305709		53.00000000	0.64792453	5.62270849	1.153313
54	0.22942451	8.69042300	1.99379604		54.00000000	0.63592593	5.52646529	1.174784
55	0.23923151	8.67422290	2.07514744		55.00000000	0.62436364	5.41586935	1.196153
56	0.24942255	8.68234250	2.16557201		56.00000000	0.61321429	5.32413645	1.217524
57	0.25955406	8.68753240	2.25488431		57.00000000	0.60245614	5.23385724	1.238907
58	0.26938266	8.68726060	2.34019737		58.00000000	0.59206897	5.14345740	1.260431
59	0.27950001	8.68425370	2.42724900		59.00000000	0.58203390	5.05453003	1.281820
60	0.28937101	8.69471930	2.51599971		60.00000000	0.57233333	4.97627768	1.303164
61	0.29951888	8.68302150	2.60072887		61.00000000	0.56295082	4.88811407	1.324543
62	0.30929092	8.68378930	2.68581718		62.00000000	0.55387097	4.80969878	1.346031
63	0.31947154	8.67675020	2.77197475		63.00000000	0.54507937	4.72951749	1.367410
64	0.32931429	8.68582060	2.86036484		64.00000000	0.53656250	4.66048562	1.388767
65	0.33943537	8.67385100	2.94421182		65.00000000	0.52830769	4.58246221	1.410139
66	0.34926248	8.69273950	3.03604776		66.00000000	0.52030303	4.52285870	1.431612
67	0.35940215	8.68144990	3.12013176		67.00000000	0.51253731	4.44956701	1.453016
68	0.36953589	8.66881280	3.20343745		68.00000000	0.50500000	4.37775046	1.474384
69	0.37937713	8.68905450	3.29642856		69.00000000	0.49768116	4.32437872	1.495748
70	0.38952947	8.67540170	3.37932463		70.00000000	0.49057143	4.25590421	1.517230
71	0.39935434	8.67581560	3.46472461		71.00000000	0.48366197	4.19616208	1.538600
72	0.40951189	8.66902450	3.55006861		72.00000000	0.47694444	4.13464307	1.559983
73	0.41932264	8.67750260	3.63867330		73.00000000	0.47041096	4.08199232	1.581344
74	0.42947647	8.66811180	3.72275006		74.00000000	0.46405405	4.02247242	1.602817
75	0.43930355	8.66928480	3.80844759		75.00000000	0.45786667	3.96937653	1.624208
76	0.44944698	8.65996270	3.89219408		76.00000000	0.45184211	3.91293578	1.645587
77	0.45960081	8.66233730	3.98121724		77.00000000	0.44597403	3.86317744	1.667064
78	0.46947107	8.64476870	4.05846881		78.00000000	0.44025641	3.80591484	1.688459
79	0.47960034	8.61964040	4.13398247		79.00000000	0.43468354	3.74681584	1.709814
80	0.48938724	8.61166480	4.21443887		80.00000000	0.42925000	3.69655712	1.731184
81	0.49954405	8.57242680	4.28230480		81.00000000	0.42395062	3.63428563	1.752679
82	0.50935555	8.54133220	4.35057496		82.00000000	0.41878049	3.57694327	1.774053
83	0.51950788	8.47170930	4.40111974		83.00000000	0.41373494	3.50504214	1.795393
84	0.52926356	8.39581780	4.44360042		84.00000000	0.40880952	3.43229028	1.816785
85	0.53940022	8.26551630	4.45842131		85.00000000	0.40400000	3.33926859	1.838267
86	0.54953098	8.08899020	4.44515071		86.00000000	0.39930233	3.22995260	1.859648
87	0.55933207	7.85126830	4.39146615		87.00000000	0.39471264	3.09899487	1.881011
88	0.56947768	7.51214930	4.27800136		88.00000000	0.39022727	2.93144553	1.902384
89	0.57925421	7.02762030	4.07077865		89.00000000	0.38584270	2.71155597	1.923862
90	0.58940279	6.39521600	3.76935815		90.00000000	0.38155556	2.44013019	1.945231
91	0.59919715	5.57752900	3.34203948		91.00000000	0.37736264	2.10475105	1.966569
92	0.60930037	4.48327400	2.73166051		92.00000000	0.37326087	1.67343075	1.988057
93	0.61908507	3.16104150	1.95695360		93.00000000	0.36924731	1.16720608	2.009566
94	0.62917119	1.47302870	0.92678722		94.00000000	0.36531915	0.53812559	2.030944
95	0.63923717	-0.54254138	-0.34681262		95.00000000	0.36147368	-0.19611443	2.052305
96	0.64900249	-2.81133720	-1.82456484		96.00000000	0.35770833	-1.00563874	2.073686
97	0.65905440	-5.54311990	-3.65321756		97.00000000	0.35402062	-1.96237874	2.095159
98	0.66903329	-8.56167790	-5.72804753		98.00000000	0.35040816	-3.00008183	2.116554
99	0.67327851	-10.00003100	-6.73280597		99.00000000	0.34686869	-3.46869762	2.137921
100	0.67329264	-9.99977780	-6.73277679		100.00000000	0.34340000	-3.43392370	2.159280
101	0.67323685	-9.99977110	-6.73221440		101.00000000	0.34000000	-3.39992217	2.180806
