# Supplementary material for: Study on the Electrical Injection Regeneration of Industrialized B-Doped Czochralski Silicon PERC Solar Cells
Source: Hindawi journal article supplement (doi:10.1155/2019/5357370), 2019-06-20
Supplement: f1 [file 5357370.f1.zip › section3.2/IVRawData_1-0-2.5h.csv]

16:39 02/04/2018
Test Lot:	JK-PERC
Recipe:	Recipe_YJX-LID
Cell Name:	1-0-2.5h
Test Order:	2
Test Condition:	Light
1	-0.29996634	8.65957640	-2.59758144		1.00000000	34.34000000	297.36985358	0.000000
2	-0.29013067	8.65305420	-2.51051641		2.00000000	17.17000000	148.57294061	0.061816
3	-0.27999359	8.65213010	-2.42254097		3.00000000	11.44666667	99.03804921	0.083250
4	-0.27017432	8.65621660	-2.33868743		4.00000000	8.58500000	74.31361951	0.104765
5	-0.26003128	8.65256210	-2.24993680		5.00000000	6.86800000	59.42579650	0.126140
6	-0.24986666	8.64645200	-2.16046008		6.00000000	5.72333333	49.48652695	0.147497
7	-0.24004962	8.65784740	-2.07831298		7.00000000	4.90571429	42.47292567	0.168871
8	-0.22989914	8.63796900	-1.98586164		8.00000000	4.29250000	37.07848193	0.190359
9	-0.22006199	8.64614010	-1.90268680		9.00000000	3.81555556	32.98982789	0.211752
10	-0.20991524	8.64241030	-1.81417363		10.00000000	3.43400000	29.67803697	0.233090
11	-0.20008405	8.64992050	-1.73071113		11.00000000	3.12181818	27.00347909	0.254461
12	-0.18997301	8.66044620	-1.64525103		12.00000000	2.86166667	24.78331021	0.275943
13	-0.18014629	8.64311120	-1.55702442		13.00000000	2.64153846	22.83111066	0.297353
14	-0.16999730	8.65898900	-1.47200475		14.00000000	2.45285714	21.23926302	0.318710
15	-0.16016388	8.65104010	-1.38558415		15.00000000	2.28933333	19.80511447	0.340090
16	-0.15001564	8.64950940	-1.29756169		16.00000000	2.14625000	18.56400955	0.361573
17	-0.13990013	8.64601990	-1.20957931		17.00000000	2.02000000	17.46496020	0.382986
18	-0.13005629	8.65430450	-1.12554674		18.00000000	1.90777778	16.51048981	0.404375
19	-0.11992442	8.64974500	-1.03731565		19.00000000	1.80736842	15.63327596	0.425727
20	-0.11010142	8.65634730	-0.95307613		20.00000000	1.71700000	14.86294831	0.447199
21	-0.09995987	8.65266900	-0.86491969		21.00000000	1.63523810	14.14917397	0.468567
22	-0.09010264	8.65831660	-0.78013714		22.00000000	1.56090909	13.51484509	0.489954
23	-0.08000574	8.64717960	-0.69182403		23.00000000	1.49304348	12.91061511	0.511367
24	-0.07014702	8.66066650	-0.60751997		24.00000000	1.43083333	12.39197032	0.532833
25	-0.06001068	8.64323140	-0.51868619		25.00000000	1.37360000	11.87234265	0.554210
26	-0.04984531	8.64908410	-0.43111630		26.00000000	1.32076923	11.42344415	0.575581
27	-0.04007739	8.64826970	-0.34660009		27.00000000	1.27185185	10.99931783	0.596944
28	-0.02988821	8.63608650	-0.25811714		28.00000000	1.22642857	10.59154323	0.618422
29	-0.02005702	8.67334650	-0.17396151		29.00000000	1.18413793	10.27043858	0.639819
30	-0.00998097	8.64736180	-0.08630904		30.00000000	1.14466667	9.89834681	0.661171
31	-0.00071395	8.64266400	-0.00617040		31.00000000	1.10774194	9.57384135	0.682660
32	0.00943782	8.64511010	0.08159097		32.00000000	1.07312500	9.27728378	0.704148
33	0.01928212	8.65005020	0.16679130		33.00000000	1.04060606	9.00129466	0.725523
34	0.02941370	8.64686970	0.25433647		34.00000000	1.01000000	8.73333840	0.746915
35	0.03923494	8.64296630	0.33910623		35.00000000	0.98114286	8.47998465	0.768258
36	0.04938215	8.64980030	0.42714574		36.00000000	0.95388889	8.25094840	0.789747
37	0.05921976	8.64936640	0.51221336		37.00000000	0.92810811	8.02754709	0.811151
38	0.06935506	8.64516740	0.59958613		38.00000000	0.90368421	7.81250128	0.832541
39	0.07950525	8.64612480	0.68741231		39.00000000	0.88051282	7.61302373	0.854033
40	0.08933392	8.64019390	0.77186241		40.00000000	0.85850000	7.41760646	0.875421
41	0.09944988	8.64953610	0.86019533		41.00000000	0.83756098	7.24451389	0.896780
42	0.10928153	8.64179610	0.94438870		42.00000000	0.81761905	7.06569710	0.918149
43	0.11946596	8.65020560	1.03340512		43.00000000	0.79860465	6.90809443	0.939637
44	0.12923658	8.64542770	1.11730551		44.00000000	0.78045455	6.74736335	0.961023
45	0.13940760	8.64487840	1.20516175		45.00000000	0.76311111	6.59700276	0.982361
46	0.14925042	8.64098170	1.28967015		46.00000000	0.74652174	6.45068069	1.003748
47	0.15939169	8.64526560	1.37798349		47.00000000	0.73063830	6.31656214	1.025235
48	0.16954486	8.63675590	1.46431757		48.00000000	0.71541667	6.17887912	1.046614
49	0.17935343	8.64656540	1.55079116		49.00000000	0.70081633	6.05965420	1.067978
50	0.18949841	8.64978500	1.63912050		50.00000000	0.68680000	5.94067234	1.089358
51	0.19930848	8.63489530	1.72100786		51.00000000	0.67333333	5.81416284	1.110836
52	0.20941179	8.64307790	1.80996241		52.00000000	0.66038462	5.70775567	1.132211
53	0.21926352	8.64391420	1.89529505		53.00000000	0.64792453	5.60060403	1.153554
54	0.22940330	8.64127730	1.98233753		54.00000000	0.63592593	5.49521227	1.174939
55	0.23922454	8.65133190	2.06961089		55.00000000	0.62436364	5.40157704	1.196430
56	0.24935240	8.64044950	2.15451682		56.00000000	0.61321429	5.29844707	1.217810
57	0.25951970	8.64799400	2.24432481		57.00000000	0.60245614	5.21003709	1.239168
58	0.26934615	8.64367680	2.32814107		58.00000000	0.59206897	5.11765278	1.260539
59	0.27949336	8.64219670	2.41543659		59.00000000	0.58203390	5.03005144	1.282011
60	0.28930864	8.63369370	2.49780218		60.00000000	0.57233333	4.94135069	1.303415
61	0.29944840	8.65985490	2.59317969		61.00000000	0.56295082	4.87507241	1.324780
62	0.30924955	8.62992860	2.66880154		62.00000000	0.55387097	4.77986691	1.346141
63	0.31942132	8.65332790	2.76405742		63.00000000	0.54507937	4.71675048	1.367629
64	0.32923064	8.63235190	2.84203474		64.00000000	0.53656250	4.63179632	1.389011
65	0.33937860	8.63735010	2.93133178		65.00000000	0.52830769	4.56317850	1.410396
66	0.34918272	8.64985660	3.02038046		66.00000000	0.52030303	4.50054660	1.431744
67	0.35934034	8.63430120	3.10265273		67.00000000	0.51253731	4.42540154	1.453215
68	0.36950469	8.64808080	3.19550642		68.00000000	0.50500000	4.36728080	1.474596
69	0.37932739	8.64163110	3.27800737		69.00000000	0.49768116	4.30077699	1.495985
70	0.38947609	8.63141920	3.36173140		70.00000000	0.49057143	4.23432765	1.517462
71	0.39928913	8.63858320	3.44929237		71.00000000	0.48366197	4.17815418	1.538849
72	0.40944156	8.63747690	3.53654202		72.00000000	0.47694444	4.11959662	1.560212
73	0.41925386	8.62705990	3.61692816		73.00000000	0.47041096	4.05826352	1.581587
74	0.42939886	8.62926770	3.70539771		74.00000000	0.46405405	4.00444666	1.603076
75	0.43923348	8.62244510	3.78726657		75.00000000	0.45786667	3.94793020	1.624467
76	0.44936359	8.61418910	3.87090294		76.00000000	0.45184211	3.89225334	1.645816
77	0.45953238	8.61282440	3.95787170		77.00000000	0.44597403	3.84109597	1.667198
78	0.46938485	8.58988570	4.03196221		78.00000000	0.44025641	3.78175224	1.688686
79	0.47953355	8.58345220	4.11605330		79.00000000	0.43468354	3.73108542	1.710078
80	0.48934066	8.55923180	4.18838014		80.00000000	0.42925000	3.67405025	1.731426
81	0.49946257	8.52448560	4.25766149		81.00000000	0.42395062	3.61396093	1.752804
82	0.50931209	8.47740940	4.31764710		82.00000000	0.41878049	3.55017364	1.774280
83	0.51943249	8.41941260	4.37331645		83.00000000	0.41373494	3.48340516	1.795666
84	0.52920240	8.32588200	4.40607674		84.00000000	0.40880952	3.40369986	1.817024
85	0.53932947	8.17916490	4.41126467		85.00000000	0.40400000	3.30438262	1.838410
86	0.54948860	7.98630670	4.38838449		86.00000000	0.39930233	3.18895084	1.859893
87	0.55928010	7.73197220	4.32433819		87.00000000	0.39471264	3.05190719	1.881269
88	0.56942880	7.34819700	4.18427500		88.00000000	0.39022727	2.86746687	1.902631
89	0.57924479	6.87550690	3.98260155		89.00000000	0.38584270	2.65286412	1.924017
90	0.58933544	6.18004420	3.64211907		90.00000000	0.38155556	2.35803020	1.945498
91	0.59914774	5.35188290	3.20656854		91.00000000	0.37736264	2.01960065	1.966883
92	0.60925478	4.22854140	2.57625906		92.00000000	0.37326087	1.57834904	1.988359
93	0.61902243	2.89908100	1.79459617		93.00000000	0.36924731	1.07047787	2.009760
94	0.62916666	1.24269630	0.78186308		94.00000000	0.36531915	0.45398075	2.031258
95	0.63918662	-0.70531267	-0.45082642		95.00000000	0.36147368	-0.25495197	2.052699
96	0.64892972	-2.87506870	-1.86571753		96.00000000	0.35770833	-1.02843603	2.074107
97	0.65901887	-5.45207500	-3.59302031		97.00000000	0.35402062	-1.93014696	2.095465
98	0.66894579	-8.26091000	-5.52610097		98.00000000	0.35040816	-2.89469030	2.116954
99	0.67456567	-9.99829480	-6.74450643		99.00000000	0.34686869	-3.46809539	2.138348
100	0.67451805	-9.99999330	-6.74517598		100.00000000	0.34340000	-3.43399770	2.159737
101	0.67451805	-10.00003100	-6.74520141		101.00000000	0.34000000	-3.40001054	2.181230
16:39 02/04/2018
Test Lot:	JK-PERC
Recipe:	Recipe_YJX-LID
Cell Name:	1-0-2.5h
Test Order:	3
Test Condition:	Light
1	-0.30000404	8.64070130	-2.59224530		1.00000000	34.34000000	296.72168264	0.000000
2	-0.29014739	8.63847450	-2.50643083		2.00000000	17.17000000	148.32260717	0.061761
3	-0.28005183	8.64526560	-2.42112245		3.00000000	11.44666667	98.95947357	0.083301
4	-0.27019888	8.64882660	-2.33690326		4.00000000	8.58500000	74.25017636	0.104707
5	-0.26002741	8.63702770	-2.24586394		5.00000000	6.86800000	59.31910624	0.126049
6	-0.24985442	8.65995120	-2.16372708		6.00000000	5.72333333	49.56378737	0.147429
7	-0.24006997	8.64910700	-2.07639086		7.00000000	4.90571429	42.43004777	0.168926
8	-0.22990145	8.64665890	-1.98787942		8.00000000	4.29250000	37.11578333	0.190298
9	-0.22008798	8.64407350	-1.90245668		9.00000000	3.81555556	32.98194267	0.211666
10	-0.20992243	8.64798070	-1.81540512		10.00000000	3.43400000	29.69716572	0.233035
11	-0.20010969	8.64469430	-1.72988710		11.00000000	3.12181818	26.98716384	0.254515
12	-0.18997245	8.65198420	-1.64363864		12.00000000	2.86166667	24.75909479	0.275920
13	-0.18019916	8.64639000	-1.55807222		13.00000000	2.64153846	22.83977174	0.297274
14	-0.17001724	8.64267830	-1.46940431		14.00000000	2.45285714	21.19925520	0.318667
15	-0.16023800	8.65491490	-1.38684625		15.00000000	2.28933333	19.81398518	0.340161
16	-0.15008512	8.64321900	-1.29721856		16.00000000	2.14625000	18.55050878	0.361536
17	-0.13996573	8.64982600	-1.21067921		17.00000000	2.02000000	17.47264852	0.382889
18	-0.13012396	8.64182760	-1.12450883		18.00000000	1.90777778	16.48668665	0.404265
19	-0.11998300	8.64897350	-1.03772979		19.00000000	1.80736842	15.63188158	0.425746
20	-0.11014494	8.64524840	-0.95223037		20.00000000	1.71700000	14.84389150	0.447131
21	-0.10001514	8.63049410	-0.86318008		21.00000000	1.63523810	14.11291273	0.468483
22	-0.09020612	8.65808200	-0.78101195		22.00000000	1.56090909	13.51447890	0.489848
23	-0.08003463	8.64252000	-0.69170088		23.00000000	1.49304348	12.90365812	0.511341
24	-0.07023901	8.65137000	-0.60766364		24.00000000	1.43083333	12.37866858	0.532728
25	-0.06006603	8.64697740	-0.51938963		25.00000000	1.37360000	11.87748816	0.554083
26	-0.04991241	8.65363790	-0.43192391		26.00000000	1.32076923	11.42945867	0.575460
27	-0.04012051	8.63835140	-0.34657506		27.00000000	1.27185185	10.98670323	0.596945
28	-0.02995944	8.65525150	-0.25930651		28.00000000	1.22642857	10.61504773	0.618327
29	-0.02010651	8.64169600	-0.17375436		29.00000000	1.18413793	10.23296002	0.639712
30	-0.00998042	8.64789580	-0.08630967		30.00000000	1.14466667	9.89895806	0.661069
31	-0.00074600	8.64388660	-0.00644833		31.00000000	1.10774194	9.57519567	0.682653
32	0.00940668	8.65174390	0.08138416		32.00000000	1.07312500	9.28440267	0.704032
33	0.01926677	8.64454270	0.16655241		33.00000000	1.04060606	8.99556352	0.725416
34	0.02939480	8.64661410	0.25416549		34.00000000	1.01000000	8.73308024	0.746899
35	0.03918865	8.63987160	0.33858493		35.00000000	0.98114286	8.47694831	0.768291
36	0.04935315	8.65092470	0.42695041		36.00000000	0.95388889	8.25202095	0.789648
37	0.05919538	8.64178940	0.51155404		37.00000000	0.92810811	8.02051481	0.811033
38	0.06933681	8.63605500	0.59879650		38.00000000	0.90368421	7.80426654	0.832532
39	0.07946558	8.65165710	0.68750898		39.00000000	0.88051282	7.61789500	0.853906
40	0.08931080	8.63725660	0.77140025		40.00000000	0.85850000	7.41508479	0.875269
41	0.09944776	8.64555550	0.85978110		41.00000000	0.83756098	7.24117990	0.896644
42	0.10927212	8.64218620	0.94435001		42.00000000	0.81761905	7.06601605	0.918120
43	0.11944109	8.63946910	1.03190761		43.00000000	0.79860465	6.89952021	0.939503
44	0.12925430	8.64179420	1.11698906		44.00000000	0.78045455	6.74452756	0.960846
45	0.13938902	8.64338300	1.20479269		45.00000000	0.76311111	6.59586160	0.982226
46	0.14923126	8.64118860	1.28953546		46.00000000	0.74652174	6.45083514	1.003747
47	0.15938905	8.64769840	1.37834843		47.00000000	0.73063830	6.31833964	1.025130
48	0.16949476	8.64463140	1.46521972		48.00000000	0.71541667	6.18451338	1.046493
49	0.17932880	8.64304540	1.54994696		49.00000000	0.70081633	6.05718733	1.067871
50	0.18943450	8.63626000	1.63600559		50.00000000	0.68680000	5.93138337	1.089357
51	0.19923729	8.65457440	1.72431395		51.00000000	0.67333333	5.82741343	1.110750
52	0.20940030	8.64520170	1.81030783		52.00000000	0.66038462	5.70915820	1.132088
53	0.21920159	8.64000700	1.89390327		53.00000000	0.64792453	5.59807246	1.153463
54	0.22936088	8.64156060	1.98203594		54.00000000	0.63592593	5.49539243	1.174957
55	0.23918451	8.64139560	2.06688797		55.00000000	0.62436364	5.39537318	1.196343
56	0.24932519	8.63239480	2.15227347		56.00000000	0.61321429	5.29350781	1.217721
57	0.25946289	8.64982800	2.24430937		57.00000000	0.60245614	5.21114199	1.239079
58	0.26928800	8.63151360	2.32436303		58.00000000	0.59206897	5.11045133	1.260578
59	0.27943614	8.64987660	2.41708813		59.00000000	0.58203390	5.03452140	1.281963
60	0.28927463	8.63554950	2.49804539		60.00000000	0.57233333	4.94241283	1.303354
61	0.29941532	8.64177890	2.58748099		61.00000000	0.56295082	4.86489652	1.324695
62	0.30923820	8.64602280	2.67368053		62.00000000	0.55387097	4.78878102	1.346170
63	0.31938037	8.62506200	2.75467549		63.00000000	0.54507937	4.70134332	1.367551
64	0.32920995	8.65278720	2.84858364		64.00000000	0.53656250	4.64276113	1.388936
65	0.33935660	8.63273720	2.92957634		65.00000000	0.52830769	4.56074147	1.410428
66	0.34917128	8.63103680	3.01371017		66.00000000	0.52030303	4.49075460	1.431811
67	0.35932687	8.64436910	3.10615409		67.00000000	0.51253731	4.43056171	1.453154
68	0.36948913	8.64131360	3.19287144		68.00000000	0.50500000	4.36386337	1.474539
69	0.37932315	8.62678240	3.27233827		69.00000000	0.49768116	4.29338707	1.496024
70	0.38943034	8.63726140	3.36361164		70.00000000	0.49057143	4.23719366	1.517429
71	0.39927408	8.62967300	3.44560475		71.00000000	0.48366197	4.17384466	1.538787
72	0.40941402	8.63154220	3.53387439		72.00000000	0.47694444	4.11676610	1.560165
73	0.41923913	8.63517190	3.62020195		73.00000000	0.47041096	4.06207949	1.581642
74	0.42940736	8.60570140	3.69535152		74.00000000	0.46405405	3.99351062	1.603012
75	0.43922353	8.63682750	3.79349786		75.00000000	0.45786667	3.95451542	1.624354
76	0.44939101	8.60872080	3.86868174		76.00000000	0.45184211	3.88978253	1.645728
77	0.45950863	8.61393550	3.95817770		77.00000000	0.44597403	3.84159149	1.667211
78	0.46937913	8.58411310	4.02920354		78.00000000	0.44025641	3.77921082	1.688583
79	0.47951013	8.57711600	4.11281401		79.00000000	0.43468354	3.72833118	1.709944
80	0.48931813	8.55208300	4.18468926		80.00000000	0.42925000	3.67098163	1.731320
81	0.49943203	8.51066680	4.25049960		81.00000000	0.42395062	3.60810244	1.752788
82	0.50925785	8.49172020	4.32447517		82.00000000	0.41878049	3.55616673	1.774175
83	0.51938069	8.39914700	4.36235476		83.00000000	0.41373494	3.47502058	1.795523
84	0.52918500	8.32237720	4.40407718		84.00000000	0.40880952	3.40226706	1.816895
85	0.53930408	8.18121720	4.41216382		85.00000000	0.40400000	3.30521175	1.838379
86	0.54944772	7.99057050	4.39040074		86.00000000	0.39930233	3.19065338	1.859760
87	0.55922449	7.73051260	4.32309197		87.00000000	0.39471264	3.05133107	1.881134
88	0.56937182	7.34796380	4.18372352		88.00000000	0.39022727	2.86737587	1.902541
89	0.57917088	6.87061880	3.97926234		89.00000000	0.38584270	2.65097809	1.924021
90	0.58928406	6.18351550	3.64384712		90.00000000	0.38155556	2.35935469	1.945409
91	0.59908533	5.33368490	3.19533238		91.00000000	0.37736264	2.01273340	1.966788
92	0.60920817	4.22598410	2.57450404		92.00000000	0.37326087	1.57739450	1.988230
93	0.61898416	2.89816310	1.79391705		93.00000000	0.36924731	1.07013893	2.009743
94	0.62914944	1.23331560	0.77593982		94.00000000	0.36531915	0.45055381	2.031185
95	0.63914865	-0.72220594	-0.46159695		95.00000000	0.36147368	-0.26105844	2.052594
96	0.64893359	-2.91120820	-1.88918079		96.00000000	0.35770833	-1.04136343	2.074084
97	0.65899616	-5.48810340	-3.61663907		97.00000000	0.35402062	-1.94290176	2.095475
98	0.66892469	-8.31782910	-5.56400125		98.00000000	0.35040816	-2.91463522	2.116833
99	0.67433631	-9.99856190	-6.74239334		99.00000000	0.34686869	-3.46818804	2.138214
100	0.67430800	-10.00006800	-6.74312585		100.00000000	0.34340000	-3.43402335	2.159707
101	0.67427677	-9.99998570	-6.74275806		101.00000000	0.34000000	-3.39999514	2.181097
16:40 02/04/2018
Test Lot:	JK-PERC
Recipe:	Recipe_YJX-LID
Cell Name:	1-0-2.5h
Test Order:	4
Test Condition:	Light
1	-0.29992089	8.65305230	-2.59523115		1.00000000	34.34000000	297.14581598	0.000000
2	-0.29012969	8.65855120	-2.51210278		2.00000000	17.17000000	148.66732410	0.061773
3	-0.27995294	8.62921620	-2.41577445		3.00000000	11.44666667	98.77576144	0.083196
4	-0.27015358	8.66298390	-2.34033611		4.00000000	8.58500000	74.37171678	0.104690
5	-0.25999323	8.63640210	-2.24540608		5.00000000	6.86800000	59.31480962	0.126067
6	-0.24981353	8.65327450	-2.16170505		6.00000000	5.72333333	49.52557439	0.147421
7	-0.23999628	8.62510400	-2.06999287		7.00000000	4.90571429	42.31229591	0.168795
8	-0.22989994	8.65295890	-1.98931473		8.00000000	4.29250000	37.14282608	0.190321
9	-0.22004698	8.64720150	-1.90279058		9.00000000	3.81555556	32.99387772	0.211723
10	-0.20992160	8.65019420	-1.81586261		10.00000000	3.43400000	29.70476688	0.233081
11	-0.20011181	8.63758560	-1.72848289		11.00000000	3.12181818	26.96497177	0.254458
12	-0.18995741	8.64522930	-1.64222537		12.00000000	2.86166667	24.73976451	0.275950
13	-0.18017739	8.64636520	-1.55787951		13.00000000	2.64153846	22.83970623	0.297323
14	-0.17000736	8.64306450	-1.46938458		14.00000000	2.45285714	21.20020250	0.318715
15	-0.16021915	8.65292740	-1.38636467		15.00000000	2.28933333	19.80943513	0.340065
16	-0.15004241	8.62907790	-1.29472764		16.00000000	2.14625000	18.52015844	0.361539
17	-0.13991928	8.65038110	-1.21035510		17.00000000	2.02000000	17.47376982	0.382929
18	-0.13008046	8.64442830	-1.12447121		18.00000000	1.90777778	16.49164821	0.404310
19	-0.11993574	8.64995000	-1.03743815		19.00000000	1.80736842	15.63364647	0.425729
20	-0.11010808	8.63061140	-0.95030005		20.00000000	1.71700000	14.81875977	0.447200
21	-0.09995145	8.64783100	-0.86436321		21.00000000	1.63523810	14.14126269	0.468571
22	-0.09018706	8.64798260	-0.77993611		22.00000000	1.56090909	13.49871466	0.489968
23	-0.08002000	8.64798740	-0.69201198		23.00000000	1.49304348	12.91182119	0.511328
24	-0.07016406	8.63917920	-0.60615991		24.00000000	1.43083333	12.36122557	0.532820
25	-0.06001413	8.64414410	-0.51877078		25.00000000	1.37360000	11.87359634	0.554203
26	-0.04983219	8.64050580	-0.43057531		26.00000000	1.32076923	11.41211420	0.575586
27	-0.04001495	8.63677600	-0.34560018		27.00000000	1.27185185	10.98469955	0.596947
28	-0.02988511	8.65125850	-0.25854382		28.00000000	1.22642857	10.61015060	0.618425
29	-0.02005820	8.64077000	-0.17331829		29.00000000	1.18413793	10.23186351	0.639797
30	-0.00993059	8.64580820	-0.08585801		30.00000000	1.14466667	9.89656845	0.661176
31	-0.00066339	8.64389040	-0.00573428		31.00000000	1.10774194	9.57519988	0.682650
32	0.00950494	8.64533230	0.08217339		32.00000000	1.07312500	9.27752222	0.704137
33	0.01929883	8.63977050	0.16673742		33.00000000	1.04060606	8.99059754	0.725512
34	0.02947378	8.64819150	0.25489488		34.00000000	1.01000000	8.73467342	0.746908
35	0.03927064	8.64981170	0.33968363		35.00000000	0.98114286	8.48670097	0.768392
36	0.04941507	8.63316630	0.42660855		36.00000000	0.95388889	8.23508141	0.789767
37	0.05925064	8.64880850	0.51244742		37.00000000	0.92810811	8.02702929	0.811142
38	0.06940252	8.65065960	0.60037754		38.00000000	0.90368421	7.81746449	0.832527
39	0.07954025	8.62453370	0.68599759		39.00000000	0.88051282	7.59401249	0.854006
40	0.08935944	8.64796920	0.77277768		40.00000000	0.85850000	7.42428156	0.875401
41	0.09949569	8.64203640	0.85984541		41.00000000	0.83756098	7.23823244	0.896740
42	0.10927767	8.64083000	0.94424977		42.00000000	0.81761905	7.06490720	0.918129
43	0.11945857	8.63805770	1.03189002		43.00000000	0.79860465	6.89839306	0.939620
44	0.12925023	8.64247040	1.11704129		44.00000000	0.78045455	6.74505531	0.961000
45	0.13941847	8.64725690	1.20558733		45.00000000	0.76311111	6.59881782	0.982365
46	0.14923692	8.64916900	1.29077534		46.00000000	0.74652174	6.45679268	1.003738
47	0.15940219	8.64207170	1.37756516		47.00000000	0.73063830	6.31422856	1.025220
48	0.16952430	8.63658910	1.46411172		48.00000000	0.71541667	6.17875979	1.046600
49	0.17935763	8.64427470	1.55041662		49.00000000	0.70081633	6.05804884	1.067957
50	0.18947379	8.65049460	1.63904200		50.00000000	0.68680000	5.94115969	1.089327
51	0.19928405	8.63420960	1.72066026		51.00000000	0.67333333	5.81370113	1.110825
52	0.20942773	8.64764210	1.81105605		52.00000000	0.66038462	5.71076980	1.132203
53	0.21925214	8.64639190	1.89573993		53.00000000	0.64792453	5.60220939	1.153542
54	0.22938243	8.64281750	1.98251048		54.00000000	0.63592593	5.49619172	1.174926
55	0.23922171	8.63534930	2.06576303		55.00000000	0.62436364	5.39159809	1.196408
56	0.24934754	8.64696600	2.15609970		56.00000000	0.61321429	5.30244308	1.217800
57	0.25951132	8.64022920	2.24223728		57.00000000	0.60245614	5.20535914	1.239157
58	0.26934242	8.63779930	2.32652577		58.00000000	0.59206897	5.11417290	1.260510
59	0.27948165	8.63094040	2.41218946		59.00000000	0.58203390	5.02349989	1.281990
60	0.28932467	8.64740660	2.50190806		60.00000000	0.57233333	4.94919904	1.303364
61	0.29945719	8.64014910	2.58735477		61.00000000	0.56295082	4.86397902	1.324751
62	0.30928755	8.64575480	2.67402432		62.00000000	0.55387097	4.78863258	1.346113
63	0.31942752	8.63966370	2.75974635		63.00000000	0.54507937	4.70930240	1.367597
64	0.32925490	8.64004900	2.84477847		64.00000000	0.53656250	4.63592629	1.388969
65	0.33940676	8.63422110	2.93051301		65.00000000	0.52830769	4.56152542	1.410353
66	0.34922445	8.63662240	3.01611971		66.00000000	0.52030303	4.49366081	1.431836
67	0.35936293	8.64109330	3.10528861		67.00000000	0.51253731	4.42888275	1.453222
68	0.36954758	8.64644910	3.19527434		68.00000000	0.50500000	4.36645680	1.474584
69	0.37936229	8.63186450	3.27460388		69.00000000	0.49768116	4.29591633	1.495960
70	0.38950449	8.63612370	3.36380896		70.00000000	0.49057143	4.23663554	1.517433
71	0.39932367	8.62183480	3.44290271		71.00000000	0.48366197	4.17005362	1.538815
72	0.40947258	8.63815310	3.53708684		72.00000000	0.47694444	4.11991913	1.560164
73	0.41930294	8.61803340	3.61356674		73.00000000	0.47041096	4.05401736	1.581540
74	0.42945185	8.62889290	3.70569402		74.00000000	0.46405405	4.00427273	1.603022
75	0.43924946	8.62022970	3.78643124		75.00000000	0.45786667	3.94691584	1.624397
76	0.44941697	8.60542870	3.86742569		76.00000000	0.45184211	3.88829502	1.645756
77	0.45951971	8.62023640	3.96116853		77.00000000	0.44597403	3.84440153	1.667128
78	0.46938950	8.59008030	4.03209350		78.00000000	0.44025641	3.78183792	1.688613
79	0.47952577	8.57790370	4.11332588		79.00000000	0.43468354	3.72867358	1.710001
80	0.48934868	8.55573460	4.18673743		80.00000000	0.42925000	3.67254908	1.731345
81	0.49950427	8.53191380	4.26172737		81.00000000	0.42395062	3.61711012	1.752712
82	0.50931525	8.47139740	4.31461188		82.00000000	0.41878049	3.54765594	1.774211
83	0.51943588	8.42897320	4.37831111		83.00000000	0.41373494	3.48736072	1.795588
84	0.52920896	8.31784630	4.40187879		84.00000000	0.40880952	3.40041479	1.816953
85	0.53934443	8.17623710	4.40980794		85.00000000	0.40400000	3.30319979	1.838339
86	0.54950374	8.00474360	4.39863655		86.00000000	0.39930233	3.19631274	1.859816
87	0.55929464	7.72766540	4.32204184		87.00000000	0.39471264	3.05020724	1.881202
88	0.56942648	7.36404230	4.19328069		88.00000000	0.39022727	2.87365014	1.902562
89	0.57920843	6.86677890	3.97729623		89.00000000	0.38584270	2.64949649	1.923938
90	0.58932012	6.19314150	3.64974289		90.00000000	0.38155556	2.36302755	1.945416
91	0.59913707	5.34965710	3.20517788		91.00000000	0.37736264	2.01876071	1.966788
92	0.60923761	4.23246380	2.57857613		92.00000000	0.37326087	1.57981312	1.988265
93	0.61907834	2.89533450	1.79243888		93.00000000	0.36924731	1.06909448	2.009645
94	0.62915063	1.22077050	0.76804853		94.00000000	0.36531915	0.44597084	2.031169
95	0.63921463	-0.74292344	-0.47488753		95.00000000	0.36147368	-0.26854727	2.052558
96	0.64896536	-2.94703530	-1.91252382		96.00000000	0.35770833	-1.05417909	2.073961
97	0.65905398	-5.56360200	-3.66671404		97.00000000	0.35402062	-1.96962982	2.095444
98	0.66899747	-8.43138980	-5.64057844		98.00000000	0.35040816	-2.95442781	2.116814
99	0.67399526	-9.99936870	-6.73952711		99.00000000	0.34686869	-3.46846789	2.138157
100	0.67393422	-9.99992940	-6.73929462		100.00000000	0.34340000	-3.43397576	2.159525
101	0.67391115	-9.99994090	-6.73907167		101.00000000	0.34000000	-3.39997991	2.181043
