# Supplementary material for: Study on the Electrical Injection Regeneration of Industrialized B-Doped Czochralski Silicon PERC Solar Cells
Source: Hindawi journal article supplement (doi:10.1155/2019/5357370), 2019-06-20
Supplement: f1 [file 5357370.f1.zip › section3.2/IVRawData_1-0-2H.csv]

15:52 02/04/2018
Test Lot:	JK-PERC
Recipe:	Recipe_YJX-LID
Cell Name:	1-0-2H
Test Order:	2
Test Condition:	Light
1	-0.29995143	8.66387940	-2.59874302		1.00000000	34.34000000	297.51761860	0.000000
2	-0.29013041	8.65149970	-2.51006316		2.00000000	17.17000000	148.54624985	0.061807
3	-0.27999380	8.66485400	-2.42610540		3.00000000	11.44666667	99.18369545	0.083220
4	-0.27017722	8.66168790	-2.34019076		4.00000000	8.58500000	74.36059062	0.104704
5	-0.26001605	8.66921620	-2.25413535		5.00000000	6.86800000	59.54017686	0.126097
6	-0.24986008	8.65520100	-2.16258921		6.00000000	5.72333333	49.53660039	0.147452
7	-0.24002044	8.66864010	-2.08065081		7.00000000	4.90571429	42.52587158	0.168835
8	-0.22991063	8.66525750	-1.99223481		8.00000000	4.29250000	37.19561782	0.190326
9	-0.22009480	8.66804790	-1.90779227		9.00000000	3.81555556	33.07341832	0.211700
10	-0.20994331	8.67091660	-1.82040093		10.00000000	3.43400000	29.77592760	0.233044
11	-0.20010218	8.66322990	-1.73353119		11.00000000	3.12181818	27.04502862	0.254417
12	-0.18995960	8.66348550	-1.64571224		12.00000000	2.86166667	24.79200767	0.275898
13	-0.18018398	8.67645070	-1.56335742		13.00000000	2.64153846	22.91917823	0.297286
14	-0.17003025	8.65627100	-1.47182792		14.00000000	2.45285714	21.23259615	0.318653
15	-0.16021666	8.66862200	-1.38885766		15.00000000	2.28933333	19.84536530	0.340029
16	-0.15006888	8.66236690	-1.29995170		16.00000000	2.14625000	18.59160496	0.361505
17	-0.13992631	8.66901780	-1.21302367		17.00000000	2.02000000	17.51141596	0.382879
18	-0.13011792	8.66887380	-1.12797583		18.00000000	1.90777778	16.53828479	0.404258
19	-0.11992400	8.65302660	-1.03770556		19.00000000	1.80736842	15.63920702	0.425641
20	-0.11011637	8.67452620	-0.95520734		20.00000000	1.71700000	14.89416149	0.447122
21	-0.09992989	8.65064810	-0.86445833		21.00000000	1.63523810	14.14586932	0.468492
22	-0.09015798	8.66379260	-0.78111002		22.00000000	1.56090909	13.52339263	0.489889
23	-0.07999010	8.66682820	-0.69326049		23.00000000	1.49304348	12.93995132	0.511235
24	-0.07015345	8.66979030	-0.60821566		24.00000000	1.43083333	12.40502495	0.532707
25	-0.06000492	8.65708350	-0.51946760		25.00000000	1.37360000	11.89136990	0.554106
26	-0.04986607	8.67369560	-0.43252314		26.00000000	1.32076923	11.45595027	0.575484
27	-0.04004951	8.66589550	-0.34706485		27.00000000	1.27185185	11.02173524	0.596958
28	-0.02990322	8.67036910	-0.25927194		28.00000000	1.22642857	10.63358839	0.618406
29	-0.02007549	8.65637780	-0.17378100		29.00000000	1.18413793	10.25034530	0.639762
30	-0.00995450	8.66744040	-0.08628007		30.00000000	1.14466667	9.92133011	0.661153
31	-0.00068946	8.67748830	-0.00598281		31.00000000	1.10774194	9.61241768	0.682610
32	0.00945513	8.65750410	0.08185784		32.00000000	1.07312500	9.29058409	0.704104
33	0.01927588	8.66266920	0.16698060		33.00000000	1.04060606	9.01442607	0.725499
34	0.02942933	8.66195960	0.25491563		34.00000000	1.01000000	8.74857920	0.746880
35	0.03922552	8.66260430	0.33979515		35.00000000	0.98114286	8.49925233	0.768230
36	0.04936184	8.66101360	0.42752360		36.00000000	0.95388889	8.26164464	0.789703
37	0.05920344	8.66698650	0.51311537		37.00000000	0.92810811	8.04390044	0.811089
38	0.06933752	8.65443040	0.60007678		38.00000000	0.90368421	7.82087210	0.832471
39	0.07948352	8.67147540	0.68923942		39.00000000	0.88051282	7.63534526	0.853831
40	0.08930056	8.66138550	0.77346656		40.00000000	0.85850000	7.43579945	0.875306
41	0.09947559	8.65880780	0.86133997		41.00000000	0.83756098	7.25227951	0.896673
42	0.10926136	8.65683650	0.94585773		42.00000000	0.81761905	7.07799441	0.918067
43	0.11946095	8.66959860	1.03567848		43.00000000	0.79860465	6.92358177	0.939548
44	0.12923928	8.67107390	1.12064335		44.00000000	0.78045455	6.76737904	0.960996
45	0.13939866	8.65874100	1.20701689		45.00000000	0.76311111	6.60758147	0.982355
46	0.14922017	8.67468360	1.29443776		46.00000000	0.74652174	6.47583989	1.003723
47	0.15936914	8.66657920	1.38118527		47.00000000	0.73063830	6.33213468	1.025199
48	0.16950250	8.65658760	1.46731324		48.00000000	0.71541667	6.19306705	1.046589
49	0.17933738	8.66732220	1.55437485		49.00000000	0.70081633	6.07420091	1.067940
50	0.18950869	8.66842650	1.64274215		50.00000000	0.68680000	5.95347532	1.089316
51	0.19927809	8.66728880	1.72720076		51.00000000	0.67333333	5.83597446	1.110804
52	0.20944493	8.66680430	1.81521822		52.00000000	0.66038462	5.72342422	1.132175
53	0.21925303	8.66759590	1.90039666		53.00000000	0.64792453	5.61594799	1.153535
54	0.22939532	8.65153790	1.98462231		54.00000000	0.63592593	5.50173725	1.174913
55	0.23923244	8.66434000	2.07279120		55.00000000	0.62436364	5.40969883	1.196382
56	0.24937546	8.65682510	2.15879974		56.00000000	0.61321429	5.30848882	1.217759
57	0.25950360	8.65680790	2.24647281		57.00000000	0.60245614	5.21534708	1.239098
58	0.26934892	8.66189960	2.33307330		58.00000000	0.59206897	5.12844194	1.260467
59	0.27949342	8.65473080	2.41894031		59.00000000	0.58203390	5.03734671	1.281947
60	0.28930971	8.67231180	2.50898401		60.00000000	0.57233333	4.96345312	1.303321
61	0.29946017	8.66476060	2.59475068		61.00000000	0.56295082	4.87783408	1.324679
62	0.30928689	8.66724210	2.68066435		62.00000000	0.55387097	4.80053377	1.346047
63	0.31944627	8.65733720	2.76555408		63.00000000	0.54507937	4.71893586	1.367535
64	0.32925290	8.66621880	2.85337767		64.00000000	0.53656250	4.64996802	1.388920
65	0.33939740	8.65749740	2.93833211		65.00000000	0.52830769	4.57382247	1.410284
66	0.34921518	8.66302300	3.02525914		66.00000000	0.52030303	4.50739712	1.431642
67	0.35935596	8.66445160	3.11362232		67.00000000	0.51253731	4.44085475	1.453118
68	0.36947665	8.65313150	3.19713004		68.00000000	0.50500000	4.36983141	1.474491
69	0.37932643	8.65484240	3.28301047		69.00000000	0.49768116	4.30735200	1.495874
70	0.38943598	8.66129210	3.37301878		70.00000000	0.49057143	4.24898244	1.517225
71	0.39932221	8.65288450	3.45528896		71.00000000	0.48366197	4.18507118	1.538702
72	0.40944290	8.64913850	3.54132835		72.00000000	0.47694444	4.12515856	1.560078
73	0.41928673	8.64605240	3.62517504		73.00000000	0.47041096	4.06719780	1.581471
74	0.42943275	8.66607860	3.72149796		74.00000000	0.46405405	4.02152891	1.602957
75	0.43922150	8.64010140	3.79491830		75.00000000	0.45786667	3.95601443	1.624335
76	0.44940248	8.63423350	3.88024595		76.00000000	0.45184211	3.90131024	1.645688
77	0.45950976	8.63004970	3.96559207		77.00000000	0.44597403	3.84877801	1.667067
78	0.46939826	8.61761670	4.04509428		78.00000000	0.44025641	3.79396099	1.688542
79	0.47950330	8.60693450	4.12705350		79.00000000	0.43468354	3.74129279	1.709925
80	0.48933151	8.58063790	4.19877650		80.00000000	0.42925000	3.68323882	1.731267
81	0.49947527	8.55616950	4.27359507		81.00000000	0.42395062	3.62739334	1.752649
82	0.50930196	8.49820520	4.32815256		82.00000000	0.41878049	3.55888252	1.774140
83	0.51944500	8.44225690	4.38528814		83.00000000	0.41373494	3.49285665	1.795524
84	0.52922183	8.35311790	4.42065234		84.00000000	0.40880952	3.41483415	1.816897
85	0.53932619	8.22038360	4.43346817		85.00000000	0.40400000	3.32103497	1.838270
86	0.54944986	8.03921410	4.41714506		86.00000000	0.39930233	3.21007689	1.859744
87	0.55931151	7.77223590	4.34710100		87.00000000	0.39471264	3.06779978	1.881130
88	0.56941289	7.41234680	4.22068581		88.00000000	0.39022727	2.89249988	1.902479
89	0.57921576	6.93168880	4.01494340		89.00000000	0.38584270	2.67454150	1.923857
90	0.58934540	6.26271580	3.69090275		90.00000000	0.38155556	2.38957401	1.945341
91	0.59914458	5.42276530	3.24902044		91.00000000	0.37736264	2.04634902	1.966715
92	0.60923475	4.32559490	2.63530273		92.00000000	0.37326087	1.61457531	1.988181
93	0.61902797	2.98407910	1.84722843		93.00000000	0.36924731	1.10186319	2.009580
94	0.62913227	1.29381640	0.81398165		94.00000000	0.36531915	0.47265591	2.031065
95	0.63917035	-0.70261467	-0.44909046		95.00000000	0.36147368	-0.25397671	2.052510
96	0.64894867	-2.92124530	-1.89573825		96.00000000	0.35770833	-1.04495379	2.073889
97	0.65900087	-5.58765320	-3.68226832		97.00000000	0.35402062	-1.97814444	2.095253
98	0.66898537	-8.49776270	-5.68487892		98.00000000	0.35040816	-2.97768542	2.116724
99	0.67360812	-9.99994470	-6.73604395		99.00000000	0.34686869	-3.46866769	2.138097
100	0.67356271	-10.00032000	-6.73584264		100.00000000	0.34340000	-3.43410989	2.159475
101	0.67351955	-10.00034000	-6.73542450		101.00000000	0.34000000	-3.40011560	2.180843
15:52 02/04/2018
Test Lot:	JK-PERC
Recipe:	Recipe_YJX-LID
Cell Name:	1-0-2H
Test Order:	3
Test Condition:	Light
1	-0.29996410	8.67920400	-2.60344962		1.00000000	34.34000000	298.04386536	0.000000
2	-0.29012817	8.65612220	-2.51138489		2.00000000	17.17000000	148.62561817	0.021516
3	-0.28003174	8.67572120	-2.42947730		3.00000000	11.44666667	99.30808867	0.042881
4	-0.27018988	8.66854670	-2.34215359		4.00000000	8.58500000	74.41947342	0.064308
5	-0.25998425	8.66100310	-2.25172440		5.00000000	6.86800000	59.48376929	0.085837
6	-0.24980967	8.66731450	-2.16517898		6.00000000	5.72333333	49.60592999	0.147461
7	-0.24001020	8.66994000	-2.08087403		7.00000000	4.90571429	42.53224851	0.168947
8	-0.22989368	8.66904350	-1.99295831		8.00000000	4.29250000	37.21186922	0.190318
9	-0.22003765	8.67229940	-1.90823238		9.00000000	3.81555556	33.08964016	0.211681
10	-0.20987871	8.65632720	-1.81677879		10.00000000	3.43400000	29.72582760	0.233058
11	-0.20005395	8.68975070	-1.73841895		11.00000000	3.12181818	27.12782173	0.254550
12	-0.18994561	8.66326620	-1.64554938		12.00000000	2.86166667	24.79138011	0.275935
13	-0.18011788	8.65407090	-1.55875290		13.00000000	2.64153846	22.86006113	0.297292
14	-0.16998275	8.66790390	-1.47339414		14.00000000	2.45285714	21.26112999	0.318669
15	-0.16016690	8.66440770	-1.38775132		15.00000000	2.28933333	19.83571736	0.340150
16	-0.15005633	8.65902710	-1.29934183		16.00000000	2.14625000	18.58443691	0.361540
17	-0.13986166	8.67151070	-1.21281188		17.00000000	2.02000000	17.51645161	0.382896
18	-0.13003393	8.66594510	-1.12686690		18.00000000	1.90777778	16.53269749	0.404266
19	-0.11988093	8.67214780	-1.03962514		19.00000000	1.80736842	15.67376608	0.425753
20	-0.11009040	8.67415520	-0.95494122		20.00000000	1.71700000	14.89352448	0.447138
21	-0.09995304	8.65880200	-0.86547358		21.00000000	1.63523810	14.15920289	0.468499
22	-0.09010521	8.66311260	-0.78059155		22.00000000	1.56090909	13.52233121	0.489874
23	-0.07996859	8.66348840	-0.69280693		23.00000000	1.49304348	12.93496485	0.511346
24	-0.07018848	8.66607000	-0.60825826		24.00000000	1.43083333	12.39970183	0.532707
25	-0.06000125	8.66191100	-0.51972546		25.00000000	1.37360000	11.89800095	0.554062
26	-0.04986611	8.66619010	-0.43214922		26.00000000	1.32076923	11.44603723	0.575446
27	-0.04004284	8.66342160	-0.34690800		27.00000000	1.27185185	11.01858881	0.596933
28	-0.02991143	8.66732500	-0.25925208		28.00000000	1.22642857	10.62985502	0.618305
29	-0.02004871	8.66609670	-0.17374406		29.00000000	1.18413793	10.26185382	0.639699
30	-0.00992772	8.67440410	-0.08611704		30.00000000	1.14466667	9.92930123	0.661050
31	-0.00067458	8.65746880	-0.00584015		31.00000000	1.10774194	9.59024124	0.682639
32	0.00948565	8.67386150	0.08227723		32.00000000	1.07312500	9.30813762	0.704013
33	0.01931609	8.66899010	0.16745097		33.00000000	1.04060606	9.02100364	0.725394
34	0.02944274	8.67093470	0.25529611		34.00000000	1.01000000	8.75764405	0.746857
35	0.03926202	8.66396710	0.34016481		35.00000000	0.98114286	8.50058943	0.768310
36	0.04941919	8.66703130	0.42831764		36.00000000	0.95388889	8.26738486	0.789672
37	0.05926228	8.66676430	0.51361218		37.00000000	0.92810811	8.04369422	0.811066
38	0.06939563	8.66670420	0.60143142		38.00000000	0.90368421	7.83196374	0.832410
39	0.07954313	8.66127490	0.68894491		39.00000000	0.88051282	7.62636359	0.853893
40	0.08937282	8.66938590	0.77480747		40.00000000	0.85850000	7.44266780	0.875280
41	0.09950618	8.67240810	0.86295818		41.00000000	0.83756098	7.26367059	0.896640
42	0.10932470	8.66444780	0.94723816		42.00000000	0.81761905	7.08421756	0.917994
43	0.11950792	8.66979310	1.03610894		43.00000000	0.79860465	6.92373709	0.939474
44	0.12931305	8.66084480	1.11996026		44.00000000	0.78045455	6.75939569	0.960859
45	0.13945013	8.66723160	1.20864657		45.00000000	0.76311111	6.61406074	0.982249
46	0.14926270	8.66171930	1.29287161		46.00000000	0.74652174	6.46616176	1.003598
47	0.15942211	8.66806410	1.38188107		47.00000000	0.73063830	6.33321960	1.025057
48	0.16955398	8.66188910	1.46865777		48.00000000	0.71541667	6.19685983	1.046444
49	0.17937474	8.66980650	1.55514429		49.00000000	0.70081633	6.07594194	1.067838
50	0.18953934	8.66287230	1.64195510		50.00000000	0.68680000	5.94966070	1.089321
51	0.19929983	8.66489030	1.72691116		51.00000000	0.67333333	5.83435947	1.110703
52	0.20947263	8.66482640	1.81504397		52.00000000	0.66038462	5.72211805	1.132046
53	0.21928073	8.66394040	1.89983518		53.00000000	0.64792453	5.61357950	1.153419
54	0.22940738	8.65945430	1.98654272		54.00000000	0.63592593	5.50677149	1.174902
55	0.23923931	8.66792200	2.07370768		55.00000000	0.62436364	5.41193530	1.196285
56	0.24939053	8.65918920	2.15951978		56.00000000	0.61321429	5.30993852	1.217627
57	0.25955588	8.67681410	2.25211812		57.00000000	0.60245614	5.22739993	1.239006
58	0.26933944	8.66529080	2.33390457		58.00000000	0.59206897	5.13044976	1.260497
59	0.27949661	8.65708450	2.41962577		59.00000000	0.58203390	5.03871664	1.281880
60	0.28932407	8.65571310	2.50430614		60.00000000	0.57233333	4.95395313	1.303236
61	0.29947156	8.66327100	2.59440328		61.00000000	0.56295082	4.87699551	1.324619
62	0.30930275	8.66812900	2.68107614		62.00000000	0.55387097	4.80102500	1.346094
63	0.31944430	8.66491510	2.76795774		63.00000000	0.54507937	4.72306642	1.367477
64	0.32926801	8.64040090	2.84500761		64.00000000	0.53656250	4.63611511	1.388812
65	0.33942446	8.66967960	2.94270132		65.00000000	0.52830769	4.58025842	1.410196
66	0.34923330	8.65705110	3.02333052		66.00000000	0.52030303	4.50428992	1.431690
67	0.35937038	8.66129490	3.11261284		67.00000000	0.51253731	4.43923682	1.453067
68	0.36954764	8.65240000	3.19747400		68.00000000	0.50500000	4.36946200	1.474430
69	0.37938330	8.65016370	3.28172765		69.00000000	0.49768116	4.30502350	1.495806
70	0.38950101	8.66038230	3.37322765		70.00000000	0.49057143	4.24853612	1.517277
71	0.39934114	8.65737340	3.45724536		71.00000000	0.48366197	4.18724229	1.538662
72	0.40949458	8.64985560	3.54206899		72.00000000	0.47694444	4.12550057	1.560029
73	0.41930938	8.64531900	3.62506335		73.00000000	0.47041096	4.06685280	1.581403
74	0.42946953	8.64356900	3.71214952		74.00000000	0.46405405	4.01108324	1.602872
75	0.43927020	8.62739090	3.78975573		75.00000000	0.45786667	3.95019471	1.624255
76	0.44943258	8.63486390	3.88078916		76.00000000	0.45184211	3.90159508	1.645643
77	0.45955849	8.63372900	3.96770346		77.00000000	0.44597403	3.85041888	1.666996
78	0.46943805	8.61790370	4.04557191		78.00000000	0.44025641	3.79408735	1.688472
79	0.47957066	8.59799190	4.12334465		79.00000000	0.43468354	3.73740559	1.709854
80	0.48941225	8.58356480	4.20090176		80.00000000	0.42925000	3.68449519	1.731234
81	0.49955007	8.54587360	4.26909176		81.00000000	0.42395062	3.62302839	1.752717
82	0.50935745	8.50538730	4.33228239		82.00000000	0.41878049	3.56189024	1.774103
83	0.51949823	8.43782710	4.38343624		83.00000000	0.41373494	3.49102389	1.795458
84	0.52926469	8.34773730	4.41816259		84.00000000	0.40880952	3.41263451	1.816834
85	0.53938609	8.22602270	4.43700222		85.00000000	0.40400000	3.32331317	1.838322
86	0.54951054	8.02805330	4.41149990		86.00000000	0.39930233	3.20562035	1.859707
87	0.55933428	7.78060580	4.35195954		87.00000000	0.39471264	3.07110348	1.881070
88	0.56945127	7.40884830	4.21897807		88.00000000	0.39022727	2.89113467	1.902445
89	0.57923776	6.94089700	4.02042963		89.00000000	0.38584270	2.67809442	1.923927
90	0.58937335	6.26709220	3.69365712		90.00000000	0.38155556	2.39124385	1.945308
91	0.59914577	5.42554570	3.25069276		91.00000000	0.37736264	2.04739823	1.966665
92	0.60926050	4.31385420	2.62826097		92.00000000	0.37326087	1.61019297	1.988133
93	0.61904776	2.97027020	1.83873911		93.00000000	0.36924731	1.09676429	2.009644
94	0.62920046	1.28569020	0.80895687		94.00000000	0.36531915	0.46968725	2.031022
95	0.63920283	-0.71731764	-0.45851147		95.00000000	0.36147368	-0.25929145	2.052383
96	0.64896107	-2.95731470	-1.91918211		96.00000000	0.35770833	-1.05785611	2.073814
97	0.65904754	-5.62183280	-3.70505508		97.00000000	0.35402062	-1.99024473	2.095305
98	0.66897774	-8.57044120	-5.73343438		98.00000000	0.35040816	-3.00315256	2.116689
99	0.67340094	-10.00052000	-6.73435957		99.00000000	0.34686869	-3.46886724	2.138037
100	0.67337191	-10.00042200	-6.73400326		100.00000000	0.34340000	-3.43414491	2.159418
101	0.67338383	-10.00024900	-6.73400597		101.00000000	0.34000000	-3.40008466	2.180904
15:52 02/04/2018
Test Lot:	JK-PERC
Recipe:	Recipe_YJX-LID
Cell Name:	1-0-2H
Test Order:	4
Test Condition:	Light
1	-0.29997623	8.66076950	-2.59802498		1.00000000	34.34000000	297.41082463	0.000000
2	-0.29010606	8.66963770	-2.51511443		2.00000000	17.17000000	148.85767931	0.021540
3	-0.27998954	8.66091160	-2.42496465		3.00000000	11.44666667	99.13856811	0.042926
4	-0.27016181	8.66972830	-2.34222949		4.00000000	8.58500000	74.42961746	0.064308
5	-0.26003784	8.66358660	-2.25286035		5.00000000	6.86800000	59.50151277	0.085823
6	-0.24986027	8.66389560	-2.16476329		6.00000000	5.72333333	49.58636248	0.107195
7	-0.24004444	8.66086290	-2.07899198		7.00000000	4.90571429	42.48771886	0.128554
8	-0.22986689	8.66206930	-1.99112293		8.00000000	4.29250000	37.18193247	0.149938
9	-0.22006892	8.66821100	-1.90760383		9.00000000	3.81555556	33.07404064	0.171412
10	-0.20989062	8.65756510	-1.81714171		10.00000000	3.43400000	29.73007855	0.192787
11	-0.20008223	8.66525080	-1.73376270		11.00000000	3.12181818	27.05133750	0.214145
12	-0.18994784	8.65701290	-1.64438090		12.00000000	2.86166667	24.77348525	0.235521
13	-0.18014690	8.66421600	-1.56083165		13.00000000	2.64153846	22.88685980	0.256995
14	-0.17001325	8.66778560	-1.47363840		14.00000000	2.45285714	21.26083982	0.278367
15	-0.16017063	8.66749670	-1.38827841		15.00000000	2.28933333	19.84278911	0.299707
16	-0.15000051	8.65826130	-1.29874361		16.00000000	2.14625000	18.58279332	0.321089
17	-0.13985199	8.67262170	-1.21288340		17.00000000	2.02000000	17.51869583	0.342562
18	-0.13004583	8.65817640	-1.12595974		18.00000000	1.90777778	16.51787653	0.363933
19	-0.11991591	8.66764830	-1.03938893		19.00000000	1.80736842	15.66563382	0.385324
20	-0.11006733	8.66374020	-0.95359475		20.00000000	1.71700000	14.87564192	0.406674
21	-0.09992103	8.66774370	-0.86608990		21.00000000	1.63523810	14.17382470	0.428144
22	-0.09011190	8.66040420	-0.78040551		22.00000000	1.56090909	13.51810365	0.449516
23	-0.07997380	8.66102500	-0.69265504		23.00000000	1.49304348	12.93128689	0.470893
24	-0.07013564	8.67293360	-0.60828173		24.00000000	1.43083333	12.40952249	0.492280
25	-0.06000720	8.64943310	-0.51902826		25.00000000	1.37360000	11.88086131	0.513753
26	-0.04983857	8.68119140	-0.43265819		26.00000000	1.32076923	11.46585049	0.535116
27	-0.04001679	8.65643410	-0.34640270		27.00000000	1.27185185	11.00970174	0.556495
28	-0.02989133	8.66166880	-0.25890883		28.00000000	1.22642857	10.62291809	0.577975
29	-0.02007848	8.65822120	-0.17384394		29.00000000	1.18413793	10.25252814	0.599350
30	-0.00992846	8.66913890	-0.08607122		30.00000000	1.14466667	9.92327433	0.620725
31	-0.00067086	8.66831970	-0.00581522		31.00000000	1.10774194	9.60226124	0.642221
32	0.00946928	8.65721800	0.08197761		32.00000000	1.07312500	9.29027707	0.663715
33	0.01929971	8.65942100	0.16712433		33.00000000	1.04060606	9.01104597	0.685097
34	0.02942935	8.66200640	0.25491718		34.00000000	1.01000000	8.74862646	0.706443
35	0.03925234	8.65691470	0.33980417		35.00000000	0.98114286	8.49367002	0.727820
36	0.04940430	8.67012880	0.42834165		36.00000000	0.95388889	8.27033953	0.749297
37	0.05921315	8.65755370	0.51264106		37.00000000	0.92810811	8.03514579	0.770693
38	0.06939638	8.66369820	0.60122927		38.00000000	0.90368421	7.82924727	0.792041
39	0.07952453	8.66195580	0.68883792		39.00000000	0.88051282	7.62696313	0.813427
40	0.08933040	8.65902230	0.77351391		40.00000000	0.85850000	7.43377064	0.834916
41	0.09949055	8.66051290	0.86163916		41.00000000	0.83756098	7.25370763	0.856311
42	0.10931800	8.65357490	0.94599150		42.00000000	0.81761905	7.07532767	0.877670
43	0.11947592	8.66267870	1.03498151		43.00000000	0.79860465	6.91805550	0.899033
44	0.12928253	8.65964510	1.11954083		44.00000000	0.78045455	6.75845938	0.920523
45	0.13946947	8.66287900	1.20820714		45.00000000	0.76311111	6.61073922	0.941905
46	0.14930066	8.65589620	1.29233102		46.00000000	0.74652174	6.46181468	0.963251
47	0.15943030	8.66358470	1.38123791		47.00000000	0.73063830	6.32994678	0.984631
48	0.16954578	8.65234180	1.46696804		48.00000000	0.71541667	6.19002953	1.006115
49	0.17938292	8.65697100	1.55291274		49.00000000	0.70081633	6.06694662	1.027495
50	0.18951702	8.65855690	1.64094390		50.00000000	0.68680000	5.94669688	1.048881
51	0.19931619	8.65975670	1.72602971		51.00000000	0.67333333	5.83090284	1.070225
52	0.20945849	8.65829470	1.81355333		52.00000000	0.66038462	5.71780462	1.091710
53	0.21927254	8.66269680	1.89949153		53.00000000	0.64792453	5.61277374	1.113108
54	0.22942078	8.66174600	1.98718452		54.00000000	0.63592593	5.50822885	1.134491
55	0.23926015	8.66771510	2.07383881		55.00000000	0.62436364	5.41180612	1.155893
56	0.24939053	8.64132400	2.15506437		56.00000000	0.61321429	5.29898332	1.177361
57	0.25954175	8.67366120	2.25117721		57.00000000	0.60245614	5.22550045	1.198732
58	0.26935357	8.65533730	2.33134600		58.00000000	0.59206897	5.12455660	1.220113
59	0.27953011	8.65457630	2.41921467		59.00000000	0.58203390	5.03725678	1.241588
60	0.28932780	8.65495870	2.50412016		60.00000000	0.57233333	4.95352136	1.262978
61	0.29947901	8.66333770	2.59448780		61.00000000	0.56295082	4.87703306	1.284341
62	0.30929381	8.66552260	2.68019250		62.00000000	0.55387097	4.79958139	1.305720
63	0.31943983	8.65632340	2.76517448		63.00000000	0.54507937	4.71838326	1.327203
64	0.32925835	8.65422440	2.84947565		64.00000000	0.53656250	4.64353228	1.348595
65	0.33939469	8.66564460	2.94107376		65.00000000	0.52830769	4.57812670	1.369977
66	0.34921545	8.65190320	3.02137827		66.00000000	0.52030303	4.50161145	1.391348
67	0.35938749	8.66159060	3.11286731		67.00000000	0.51253731	4.43938838	1.412844
68	0.36953574	8.65626530	3.19879940		68.00000000	0.50500000	4.37141398	1.434230
69	0.37937957	8.64811800	3.28091929		69.00000000	0.49768116	4.30400539	1.455572
70	0.38949433	8.64706800	3.36798396		70.00000000	0.49057143	4.24200450	1.476955
71	0.39932698	8.64996240	3.45416336		71.00000000	0.48366197	4.18365787	1.498435
72	0.40947300	8.66895870	3.54970453		72.00000000	0.47694444	4.13461169	1.519830
73	0.41929451	8.64050960	3.62291824		73.00000000	0.47041096	4.06459041	1.541179
74	0.42945093	8.64830020	3.71402056		74.00000000	0.46405405	4.01327877	1.562553
75	0.43926424	8.63207340	3.79176116		75.00000000	0.45786667	3.95233867	1.584021
76	0.44940057	8.63162800	3.87905854		76.00000000	0.45184211	3.90013297	1.605398
77	0.45953989	8.61896990	3.96076048		77.00000000	0.44597403	3.84383671	1.626755
78	0.46942985	8.61607270	4.04464172		78.00000000	0.44025641	3.79328124	1.648129
79	0.47955951	8.59014030	4.11948347		79.00000000	0.43468354	3.73399263	1.669615
80	0.48939291	8.58096120	4.19946157		80.00000000	0.42925000	3.68337760	1.690986
81	0.49950692	8.54982760	4.27069805		81.00000000	0.42395062	3.62470469	1.712399
82	0.50931352	8.49815270	4.32822407		82.00000000	0.41878049	3.55886053	1.733754
83	0.51948112	8.43370340	4.38114969		83.00000000	0.41373494	3.48931777	1.755226
84	0.52925575	8.33954330	4.41375124		84.00000000	0.40880952	3.40928473	1.776618
85	0.53937572	8.20730300	4.42681996		85.00000000	0.40400000	3.31575041	1.798000
86	0.54953063	8.03458980	4.41525319		86.00000000	0.39930233	3.20823039	1.819356
87	0.55933499	7.77182440	4.34705332		87.00000000	0.39471264	3.06763736	1.840837
88	0.56946468	7.40936470	4.21937150		88.00000000	0.39022727	2.89133618	1.862209
89	0.57926160	6.93049140	4.01456754		89.00000000	0.38584270	2.67407949	1.883606
90	0.58934659	6.26490260	3.69219898		90.00000000	0.38155556	2.39040839	1.905095
91	0.59916210	5.41529750	3.24464102		91.00000000	0.37736264	2.04353095	1.926466
92	0.60929024	4.30088470	2.62048707		92.00000000	0.37326087	1.60535196	1.947822
93	0.61903960	2.97178790	1.83965439		93.00000000	0.36924731	1.09732469	1.969210
94	0.62912977	1.25891010	0.79201782		94.00000000	0.36531915	0.45990397	1.990762
95	0.63921547	-0.72717577	-0.46482200		95.00000000	0.36147368	-0.26285490	2.012225
96	0.64899826	-2.98444340	-1.93689857		96.00000000	0.35770833	-1.06756027	2.033591
97	0.65901554	-5.66344790	-3.73230018		97.00000000	0.35402062	-2.00497733	2.054968
98	0.66900748	-8.61337380	-5.76241150		98.00000000	0.35040816	-3.01819649	2.076461
99	0.67328185	-10.00047100	-6.73313562		99.00000000	0.34686869	-3.46885024	2.097844
100	0.67319626	-10.00036200	-6.73220630		100.00000000	0.34340000	-3.43412431	2.119198
101	0.67323273	-10.00011700	-6.73240607		101.00000000	0.34000000	-3.40003978	2.140576
