# Supplementary material for: Study on the Electrical Injection Regeneration of Industrialized B-Doped Czochralski Silicon PERC Solar Cells
Source: Hindawi journal article supplement (doi:10.1155/2019/5357370), 2019-06-20
Supplement: f1 [file 5357370.f1.zip › section3.2/IVRawData_1-0-3h.csv]

17:23 02/04/2018
Test Lot:	JK-PERC
Recipe:	Recipe_YJX-LID
Cell Name:	1-0-3h
Test Order:	2
Test Condition:	Light
1	-0.29993740	8.63495920	-2.58994721		1.00000000	34.34000000	296.52449893	0.000000
2	-0.29012543	8.64154820	-2.50713289		2.00000000	17.17000000	148.37538259	0.061788
3	-0.27998301	8.64468570	-2.42036512		3.00000000	11.44666667	98.95283565	0.083213
4	-0.27016285	8.64263630	-2.33491925		4.00000000	8.58500000	74.19703264	0.104693
5	-0.26000929	8.64813330	-2.24859500		5.00000000	6.86800000	59.39537950	0.126142
6	-0.24985866	8.64340210	-2.15962887		6.00000000	5.72333333	49.46907135	0.147511
7	-0.24003555	8.63996220	-2.07389808		7.00000000	4.90571429	42.38518599	0.168886
8	-0.22988792	8.65080360	-1.98871525		8.00000000	4.29250000	37.13357445	0.190394
9	-0.22004692	8.64145470	-1.90152549		9.00000000	3.81555556	32.97195049	0.211777
10	-0.20993353	8.64977740	-1.81587830		10.00000000	3.43400000	29.70333559	0.233152
11	-0.20011786	8.64111040	-1.72924052		11.00000000	3.12181818	26.97597556	0.254510
12	-0.18996501	8.65203480	-1.64358388		12.00000000	2.86166667	24.75923959	0.275995
13	-0.18017836	8.63016320	-1.55496865		13.00000000	2.64153846	22.79690802	0.297381
14	-0.17002477	8.64115240	-1.46920995		14.00000000	2.45285714	21.19551239	0.318756
15	-0.16020983	8.63375090	-1.38321176		15.00000000	2.28933333	19.76553373	0.340112
16	-0.15006891	8.64284800	-1.29702278		16.00000000	2.14625000	18.54971252	0.361590
17	-0.13991830	8.63363740	-1.20800387		17.00000000	2.02000000	17.43994755	0.382983
18	-0.13013463	8.63175680	-1.12329048		18.00000000	1.90777778	16.46747381	0.404370
19	-0.11995796	8.64872070	-1.03748289		19.00000000	1.80736842	15.63142468	0.425853
20	-0.11015196	8.63670830	-0.95135035		20.00000000	1.71700000	14.82922815	0.447223
21	-0.09996637	8.64088540	-0.86379795		21.00000000	1.63523810	14.12990498	0.468577
22	-0.09017823	8.64967060	-0.78001198		22.00000000	1.56090909	13.50134947	0.489952
23	-0.08001273	8.64079000	-0.69137321		23.00000000	1.49304348	12.90107516	0.511442
24	-0.07021715	8.64309020	-0.60689314		24.00000000	1.43083333	12.36682156	0.532823
25	-0.06004570	8.64327720	-0.51899164		25.00000000	1.37360000	11.87240556	0.554165
26	-0.04988244	8.64150430	-0.43105930		26.00000000	1.32076923	11.41343299	0.575539
27	-0.04006676	8.63883780	-0.34613024		27.00000000	1.27185185	10.98732185	0.597020
28	-0.02990424	8.63425830	-0.25820094		28.00000000	1.22642857	10.58930107	0.618393
29	-0.02005805	8.65186120	-0.17353944		29.00000000	1.18413793	10.24499702	0.639757
30	-0.00994614	8.64176460	-0.08595220		30.00000000	1.14466667	9.89193988	0.661145
31	-0.00069017	8.63977910	-0.00596288		31.00000000	1.10774194	9.57064562	0.682737
32	0.00945726	8.64450170	0.08175329		32.00000000	1.07312500	9.27663089	0.704115
33	0.01931359	8.63997080	0.16686887		33.00000000	1.04060606	8.99080598	0.725473
34	0.02944828	8.62340070	0.25394435		34.00000000	1.01000000	8.70963471	0.746851
35	0.03927559	8.65553950	0.33995142		35.00000000	0.98114286	8.49232076	0.768333
36	0.04939986	8.63746740	0.42668968		36.00000000	0.95388889	8.23918418	0.789722
37	0.05918698	8.64749240	0.51181896		37.00000000	0.92810811	8.02580781	0.811073
38	0.06934251	8.63141630	0.59852406		38.00000000	0.90368421	7.80007462	0.832447
39	0.07948539	8.64894770	0.68746496		39.00000000	0.88051282	7.61550933	0.853931
40	0.08934321	8.63759140	0.77171010		40.00000000	0.85850000	7.41537222	0.875318
41	0.09944738	8.63967510	0.85919309		41.00000000	0.83756098	7.23625471	0.896681
42	0.10927841	8.63363270	0.94346965		42.00000000	0.81761905	7.05902255	0.918044
43	0.11945776	8.63863750	1.03195229		43.00000000	0.79860465	6.89885609	0.939515
44	0.12927391	8.64010430	1.11694007		44.00000000	0.78045455	6.74320867	0.960902
45	0.13940264	8.64368060	1.20495189		45.00000000	0.76311111	6.59608871	0.982287
46	0.14922696	8.63270000	1.28823158		46.00000000	0.74652174	6.44449822	1.003641
47	0.15938920	8.64379410	1.37772743		47.00000000	0.73063830	6.31548701	1.025103
48	0.16953357	8.64012910	1.46479193		48.00000000	0.71541667	6.18129236	1.046471
49	0.17935567	8.63380620	1.54852210		49.00000000	0.70081633	6.05071235	1.067849
50	0.18946058	8.64833550	1.63851866		50.00000000	0.68680000	5.93967682	1.089343
51	0.19927599	8.63788510	1.72132310		51.00000000	0.67333333	5.81617597	1.110711
52	0.20941067	8.64389130	1.81012307		52.00000000	0.66038462	5.70829283	1.132077
53	0.21924393	8.63346200	1.89283414		53.00000000	0.64792453	5.59383179	1.153463
54	0.22940467	8.64135070	1.98236621		54.00000000	0.63592593	5.49525895	1.174931
55	0.23922826	8.63492110	2.06571715		55.00000000	0.62436364	5.39133074	1.196325
56	0.24936816	8.64619260	2.15608514		56.00000000	0.61321429	5.30196882	1.217671
57	0.25949988	8.62991910	2.23946297		57.00000000	0.60245614	5.19914775	1.239040
58	0.26932198	8.64132120	2.32729774		58.00000000	0.59206897	5.11625810	1.260538
59	0.27950132	8.63574500	2.41370213		59.00000000	0.58203390	5.02629633	1.281916
60	0.28930405	8.63588240	2.49839575		60.00000000	0.57233333	4.94260336	1.303261
61	0.29945365	8.64042000	2.58740531		61.00000000	0.56295082	4.86413152	1.324642
62	0.30929434	8.64129730	2.67270435		62.00000000	0.55387097	4.78616370	1.346105
63	0.31944838	8.61890130	2.75329406		63.00000000	0.54507937	4.69798525	1.367484
64	0.32926974	8.64699360	2.84719333		64.00000000	0.53656250	4.63965250	1.388859
65	0.33942080	8.63242440	2.93002440		65.00000000	0.52830769	4.56057621	1.410247
66	0.34923992	8.62488940	3.01215568		66.00000000	0.52030303	4.48755609	1.431777
67	0.35936344	8.63428970	3.10284805		67.00000000	0.51253731	4.42539565	1.453158
68	0.36953089	8.63031960	3.18916968		68.00000000	0.50500000	4.35831140	1.474506
69	0.37932545	8.63165470	3.27420630		69.00000000	0.49768116	4.29581192	1.495883
70	0.38949287	8.62666030	3.36002268		70.00000000	0.49057143	4.23199307	1.517370
71	0.39929041	8.62678050	3.44459072		71.00000000	0.48366197	4.17244567	1.538751
72	0.40945563	8.62425520	3.53124985		72.00000000	0.47694444	4.11329061	1.560162
73	0.41928962	8.62134650	3.61484110		73.00000000	0.47041096	4.05557587	1.581526
74	0.42941242	8.62079720	3.70187739		74.00000000	0.46405405	4.00051589	1.602997
75	0.43921813	8.61730290	3.78487567		75.00000000	0.45786667	3.94557575	1.624393
76	0.44939524	8.60820580	3.86848671		76.00000000	0.45184211	3.88954983	1.645769
77	0.45950612	8.59583760	3.94983998		77.00000000	0.44597403	3.83352030	1.667121
78	0.46939892	8.58184620	4.02830934		78.00000000	0.44025641	3.77821280	1.688589
79	0.47953510	8.58498380	4.11680107		79.00000000	0.43468354	3.73175119	1.709962
80	0.48931405	8.54945660	4.18336923		80.00000000	0.42925000	3.66985425	1.731339
81	0.49949116	8.52009490	4.25571208		81.00000000	0.42395062	3.61209949	1.752826
82	0.50931698	8.47934250	4.31867311		82.00000000	0.41878049	3.55098319	1.774208
83	0.51944792	8.41318040	4.37020906		83.00000000	0.41373494	3.48082669	1.795572
84	0.52922243	8.32372950	4.40510435		84.00000000	0.40880952	3.40281989	1.816947
85	0.53935188	8.18482880	4.41450280		85.00000000	0.40400000	3.30667084	1.838427
86	0.54948062	8.00418380	4.39814388		86.00000000	0.39930233	3.19608921	1.859812
87	0.55929899	7.73641920	4.32697144		87.00000000	0.39471264	3.05366248	1.881185
88	0.56939572	7.37185670	4.19750365		88.00000000	0.39022727	2.87669953	1.902561
89	0.57922226	6.89433480	3.99335218		89.00000000	0.38584270	2.66012873	1.924046
90	0.58932871	6.21171050	3.66073934		90.00000000	0.38155556	2.37011265	1.945427
91	0.59912473	5.36769150	3.21591672		91.00000000	0.37736264	2.02556622	1.966777
92	0.60923636	4.24087910	2.58369775		92.00000000	0.37326087	1.58295422	1.988252
93	0.61902273	2.88785200	1.78764603		93.00000000	0.36924731	1.06633159	2.009767
94	0.62916934	1.16921840	0.73563637		94.00000000	0.36531915	0.42713787	2.031153
95	0.63919759	-0.85417080	-0.54598392		95.00000000	0.36147368	-0.30876027	2.052511
96	0.64895195	-3.12770530	-2.02973045		96.00000000	0.35770833	-1.11880625	2.073900
97	0.65902787	-5.84402320	-3.85137416		97.00000000	0.35402062	-2.06890471	2.095387
98	0.66899806	-8.82832530	-5.90613250		98.00000000	0.35040816	-3.09351725	2.116768
99	0.67255789	-9.99995800	-6.72555065		99.00000000	0.34686869	-3.46867230	2.138181
100	0.67253184	-9.99992470	-6.72526776		100.00000000	0.34340000	-3.43397414	2.159571
101	0.67250431	-9.99988650	-6.72496677		101.00000000	0.34000000	-3.39996141	2.181059
17:23 02/04/2018
Test Lot:	JK-PERC
Recipe:	Recipe_YJX-LID
Cell Name:	1-0-3h
Test Order:	3
Test Condition:	Light
1	-0.29998863	8.63881590	-2.59154655		1.00000000	34.34000000	296.65693801	0.000000
2	-0.29019156	8.65354350	-2.51118529		2.00000000	17.17000000	148.58134190	0.061809
3	-0.28002310	8.64911080	-2.42195082		3.00000000	11.44666667	99.00348829	0.083238
4	-0.27021486	8.64162730	-2.33509611		4.00000000	8.58500000	74.18837037	0.104737
5	-0.26006126	8.64642430	-2.24860000		5.00000000	6.86800000	59.38364209	0.126165
6	-0.24991365	8.65567780	-2.16317203		6.00000000	5.72333333	49.53932928	0.147525
7	-0.24008979	8.65249540	-2.07737580		7.00000000	4.90571429	42.44667029	0.168917
8	-0.22992802	8.64712810	-1.98821704		8.00000000	4.29250000	37.11779737	0.190404
9	-0.22010639	8.63748740	-1.90116617		9.00000000	3.81555556	32.95681304	0.211791
10	-0.20994760	8.64908890	-1.81585546		10.00000000	3.43400000	29.70097128	0.233127
11	-0.20014606	8.66158870	-1.73358285		11.00000000	3.12181818	27.03990509	0.254510
12	-0.19000365	8.64407060	-1.64240496		12.00000000	2.86166667	24.73644870	0.275993
13	-0.18019913	8.65039250	-1.55879320		13.00000000	2.64153846	22.85034450	0.297362
14	-0.17006490	8.64967820	-1.47100666		14.00000000	2.45285714	21.21642496	0.318701
15	-0.16025145	8.63770100	-1.38420411		15.00000000	2.28933333	19.77457682	0.340069
16	-0.15010309	8.65539930	-1.29920218		16.00000000	2.14625000	18.57665075	0.361546
17	-0.13994355	8.65091990	-1.21064044		17.00000000	2.02000000	17.47485820	0.382930
18	-0.13013755	8.65652370	-1.12653879		18.00000000	1.90777778	16.51472355	0.404299
19	-0.11996536	8.64591980	-1.03721088		19.00000000	1.80736842	15.62636242	0.425659
20	-0.11013554	8.63816170	-0.95136860		20.00000000	1.71700000	14.83172364	0.447135
21	-0.09998792	8.67035870	-0.86693111		21.00000000	1.63523810	14.17810085	0.468526
22	-0.09015959	8.63784410	-0.77878447		22.00000000	1.56090909	13.48288938	0.489905
23	-0.08000526	8.65292930	-0.69227984		23.00000000	1.49304348	12.91919966	0.511302
24	-0.07019107	8.64433960	-0.60675545		24.00000000	1.43083333	12.36860924	0.532803
25	-0.06004270	8.65659050	-0.51976505		25.00000000	1.37360000	11.89069271	0.554180
26	-0.04990326	8.63567640	-0.43094840		26.00000000	1.32076923	11.40573568	0.575575
27	-0.04008460	8.64885040	-0.34668574		27.00000000	1.27185185	11.00005640	0.597052
28	-0.02993475	8.64007380	-0.25863841		28.00000000	1.22642857	10.59643337	0.618446
29	-0.02010418	8.65423390	-0.17398630		29.00000000	1.18413793	10.24780663	0.639810
30	-0.00996846	8.64886380	-0.08621589		30.00000000	1.14466667	9.90006610	0.661184
31	-0.00066932	8.64921280	-0.00578913		31.00000000	1.10774194	9.58109573	0.682777
32	0.00945354	8.65558620	0.08182589		32.00000000	1.07312500	9.28852594	0.704165
33	0.01926000	8.64438820	0.16649091		33.00000000	1.04060606	8.99540275	0.725512
34	0.02939394	8.65596680	0.25443298		34.00000000	1.01000000	8.74252647	0.746887
35	0.03923092	8.64263730	0.33905861		35.00000000	0.98114286	8.47966185	0.768378
36	0.04938943	8.65270420	0.42735209		36.00000000	0.95388889	8.25371840	0.789754
37	0.05917654	8.63795280	0.51116414		37.00000000	0.92810811	8.01695403	0.811160
38	0.06933355	8.65925220	0.60037672		38.00000000	0.90368421	7.82522949	0.832554
39	0.07950247	8.63605880	0.68658801		39.00000000	0.88051282	7.60416049	0.854044
40	0.08928066	8.65618040	0.77282947		40.00000000	0.85850000	7.43133087	0.875456
41	0.09945256	8.64106660	0.85937615		41.00000000	0.83756098	7.23742017	0.896807
42	0.10923446	8.65219310	0.94511764		42.00000000	0.81761905	7.07419788	0.918186
43	0.11943092	8.64225670	1.03215267		43.00000000	0.79860465	6.90174640	0.939669
44	0.12922399	8.65099530	1.11791613		44.00000000	0.78045455	6.75170860	0.961032
45	0.13939142	8.65863700	1.20693971		45.00000000	0.76311111	6.60750210	0.982378
46	0.14922543	8.64222810	1.28964020		46.00000000	0.74652174	6.45161115	1.003769
47	0.15937127	8.65961270	1.38009347		47.00000000	0.73063830	6.32704468	1.025244
48	0.16951042	8.65005210	1.46627396		48.00000000	0.71541667	6.18839144	1.046629
49	0.17933550	8.63928320	1.54933017		49.00000000	0.70081633	6.05455072	1.068002
50	0.18946199	8.65289880	1.63939543		50.00000000	0.68680000	5.94281090	1.089360
51	0.19926697	8.63659100	1.72098732		51.00000000	0.67333333	5.81530461	1.110840
52	0.20939273	8.64109040	1.80938151		52.00000000	0.66038462	5.70644316	1.132217
53	0.21921854	8.65032770	1.89631221		53.00000000	0.64792453	5.60475949	1.153601
54	0.22938375	8.65934940	1.98631404		54.00000000	0.63592593	5.50670479	1.174964
55	0.23920584	8.64214130	2.06725067		55.00000000	0.62436364	5.39583877	1.196443
56	0.24934499	8.65238190	2.15742808		56.00000000	0.61321429	5.30576419	1.217814
57	0.25953028	8.65017410	2.24498211		57.00000000	0.60245614	5.21135050	1.239202
58	0.26931518	8.65645410	2.33131449		58.00000000	0.59206897	5.12521782	1.260714
59	0.27947068	8.63679310	2.41373044		59.00000000	0.58203390	5.02690636	1.282091
60	0.28928980	8.65458770	2.50368394		60.00000000	0.57233333	4.95330903	1.303451
61	0.29944459	8.64860530	2.58977807		61.00000000	0.56295082	4.86873944	1.324829
62	0.30926967	8.64186950	2.67266813		62.00000000	0.55387097	4.78648062	1.346302
63	0.31941625	8.64777570	2.76224008		63.00000000	0.54507937	4.71372409	1.367714
64	0.32920560	8.64126870	2.84475405		64.00000000	0.53656250	4.63658074	1.389062
65	0.33938718	8.64935780	2.93548115		65.00000000	0.52830769	4.56952226	1.410442
66	0.34920928	8.64309980	3.01825066		66.00000000	0.52030303	4.49703102	1.431924
67	0.35935661	8.64382360	3.10621515		67.00000000	0.51253731	4.43028213	1.453308
68	0.36950991	8.64758680	3.19536902		68.00000000	0.50500000	4.36703133	1.474674
69	0.37930223	8.63646890	3.27583191		69.00000000	0.49768116	4.29820786	1.496049
70	0.38945851	8.65065290	3.36907039		70.00000000	0.49057143	4.24376315	1.517525
71	0.39929697	8.63270760	3.44701399		71.00000000	0.48366197	4.17531238	1.538927
72	0.40944505	8.64296910	3.53882092		72.00000000	0.47694444	4.12221610	1.560322
73	0.41923440	8.63613510	3.62056492		73.00000000	0.47041096	4.06253259	1.581710
74	0.42940035	8.62144280	3.70205056		74.00000000	0.46405405	4.00081548	1.603203
75	0.43922392	8.63222220	3.79147847		75.00000000	0.45786667	3.95240680	1.624597
76	0.44936159	8.61256410	3.87015550		76.00000000	0.45184211	3.89151909	1.645945
77	0.45950669	8.61743070	3.95976706		77.00000000	0.44597403	3.84315026	1.667323
78	0.46938461	8.59875300	4.03612232		78.00000000	0.44025641	3.78565613	1.688802
79	0.47949326	8.57905390	4.11359852		79.00000000	0.43468354	3.72917356	1.710165
80	0.48931012	8.57080940	4.19378378		80.00000000	0.42925000	3.67901993	1.731539
81	0.49943662	8.53096870	4.26067817		81.00000000	0.42395062	3.61670945	1.752901
82	0.50927585	8.49222280	4.32488398		82.00000000	0.41878049	3.55637721	1.774372
83	0.51938969	8.42446520	4.37558037		83.00000000	0.41373494	3.48549560	1.795747
84	0.52920359	8.34111690	4.41414901		84.00000000	0.40880952	3.40992803	1.817124
85	0.53928691	8.19894120	4.42158167		85.00000000	0.40400000	3.31237224	1.838482
86	0.54946476	8.03238680	4.41351349		86.00000000	0.39930233	3.20735073	1.859960
87	0.55927420	7.76492310	4.34272115		87.00000000	0.39471264	3.06491332	1.881332
88	0.56937540	7.40699010	4.21735795		88.00000000	0.39022727	2.89040955	1.902722
89	0.57918930	6.92437270	4.01052258		89.00000000	0.38584270	2.67171864	1.924198
90	0.58929348	6.26765630	3.69348899		90.00000000	0.38155556	2.39145908	1.945565
91	0.59907985	5.40165900	3.23602506		91.00000000	0.37736264	2.03838429	1.966917
92	0.60921603	4.28558680	2.61084818		92.00000000	0.37326087	1.59964186	1.988386
93	0.61902028	2.89445400	1.79172573		93.00000000	0.36924731	1.06876936	2.009904
94	0.62914306	1.16666470	0.73399900		94.00000000	0.36531915	0.42620496	2.031301
95	0.63917130	-0.91093260	-0.58224197		95.00000000	0.36147368	-0.32927816	2.052657
96	0.64893907	-3.26443510	-2.11841948		96.00000000	0.35770833	-1.16771564	2.074043
97	0.65903878	-6.08873650	-4.01271347		97.00000000	0.35402062	-2.15553826	2.095528
98	0.66901940	-9.21871470	-6.16749898		98.00000000	0.35040816	-3.23031289	2.116959
99	0.67123657	-10.00004400	-6.71239523		99.00000000	0.34686869	-3.46870213	2.138327
100	0.67122167	-9.99986740	-6.71212770		100.00000000	0.34340000	-3.43395447	2.159716
101	0.67124474	-9.99985030	-6.71234691		101.00000000	0.34000000	-3.39994910	2.181196
17:25 02/04/2018
Test Lot:	JK-PERC
Recipe:	Recipe_YJX-LID
Cell Name:	1-0-3h
Test Order:	4
Test Condition:	Light
1	-0.29996106	8.66744230	-2.59989518		1.00000000	34.34000000	297.63996858	0.000000
2	-0.29012096	8.65586190	-2.51124696		2.00000000	17.17000000	148.62114882	0.061763
3	-0.28000399	8.64183810	-2.41974915		3.00000000	11.44666667	98.92024012	0.083272
4	-0.27017507	8.66442110	-2.34091058		4.00000000	8.58500000	74.38405514	0.104698
5	-0.26001644	8.64594170	-2.24808698		5.00000000	6.86800000	59.38032760	0.126060
6	-0.24983695	8.64956000	-2.16097969		6.00000000	5.72333333	49.50431507	0.147449
7	-0.24001919	8.64579490	-2.07515669		7.00000000	4.90571429	42.41379955	0.168930
8	-0.22987321	8.64579960	-1.98743771		8.00000000	4.29250000	37.11209478	0.190301
9	-0.22003907	8.65291600	-1.90397959		9.00000000	3.81555556	33.01568172	0.211646
10	-0.20989829	8.65848540	-1.81740128		10.00000000	3.43400000	29.73323886	0.233025
11	-0.20008796	8.66041950	-1.73284567		11.00000000	3.12181818	27.03625506	0.254520
12	-0.18996133	8.65074830	-1.64330765		12.00000000	2.86166667	24.75555805	0.275899
13	-0.18015176	8.66118240	-1.56032725		13.00000000	2.64153846	22.87884643	0.297252
14	-0.17000726	8.65940000	-1.47216087		14.00000000	2.45285714	21.24027114	0.318635
15	-0.16018057	8.65820500	-1.38687621		15.00000000	2.28933333	19.82151731	0.340119
16	-0.15003607	8.65328030	-1.29830417		16.00000000	2.14625000	18.57210284	0.361496
17	-0.13987966	8.65176110	-1.21020540		17.00000000	2.02000000	17.47655742	0.382845
18	-0.13006338	8.65547750	-1.12576066		18.00000000	1.90777778	16.51272763	0.404226
19	-0.11992707	8.65973380	-1.03853650		19.00000000	1.80736842	15.65132940	0.425714
20	-0.11009293	8.65565780	-0.95292673		20.00000000	1.71700000	14.86176444	0.447092
21	-0.09995066	8.65954970	-0.86552774		21.00000000	1.63523810	14.16042556	0.468435
22	-0.09013961	8.65089040	-0.77978784		22.00000000	1.56090909	13.50325347	0.489800
23	-0.07999659	8.64605710	-0.69165511		23.00000000	1.49304348	12.90893917	0.511293
24	-0.07020711	8.65157790	-0.60740230		24.00000000	1.43083333	12.37896605	0.532682
25	-0.06002689	8.64989380	-0.51922621		25.00000000	1.37360000	11.88149412	0.554047
26	-0.04990099	8.65972330	-0.43212880		26.00000000	1.32076923	11.43749608	0.575418
27	-0.04006463	8.65322020	-0.34668802		27.00000000	1.27185185	11.00561414	0.596891
28	-0.02992013	8.65167140	-0.25885909		28.00000000	1.22642857	10.61065700	0.618285
29	-0.02011278	8.65391060	-0.17405423		29.00000000	1.18413793	10.24742379	0.639656
30	-0.00994819	8.64273450	-0.08597954		30.00000000	1.14466667	9.89305009	0.661025
31	-0.00068193	8.66948130	-0.00591202		31.00000000	1.10774194	9.60354799	0.682609
32	0.00946161	8.65074160	0.08184997		32.00000000	1.07312500	9.28332708	0.703983
33	0.01928505	8.65552140	0.16692215		33.00000000	1.04060606	9.00698803	0.725354
34	0.02940024	8.66182140	0.25465958		34.00000000	1.01000000	8.74843961	0.746707
35	0.03923484	8.63669590	0.33885935		35.00000000	0.98114286	8.47383249	0.768174
36	0.04938202	8.65838150	0.42756840		36.00000000	0.95388889	8.25913391	0.789559
37	0.05922258	8.64777950	0.51214377		37.00000000	0.92810811	8.02607427	0.810948
38	0.06933925	8.64637090	0.59953290		38.00000000	0.90368421	7.81358886	0.832439
39	0.07953258	8.65699480	0.68851312		39.00000000	0.88051282	7.62259491	0.853832
40	0.08936793	8.65312960	0.77331225		40.00000000	0.85850000	7.42871176	0.875174
41	0.09949055	8.65337180	0.86092875		41.00000000	0.83756098	7.24772653	0.896550
42	0.10929241	8.65115740	0.94550584		42.00000000	0.81761905	7.07335107	0.918042
43	0.11947085	8.65163800	1.03361855		43.00000000	0.79860465	6.90923835	0.939423
44	0.12929951	8.66507720	1.12039024		44.00000000	0.78045455	6.76269889	0.960766
45	0.13943478	8.64588360	1.20553688		45.00000000	0.76311111	6.59776984	0.982144
46	0.14923142	8.64323330	1.28984198		46.00000000	0.74652174	6.45236155	1.003625
47	0.15940838	8.65348050	1.37943731		47.00000000	0.73063830	6.32256426	1.025010
48	0.16956301	8.65085980	1.46686583		48.00000000	0.71541667	6.18896928	1.046379
49	0.17937826	8.64706800	1.55109601		49.00000000	0.70081633	6.06000643	1.067755
50	0.18951949	8.65092180	1.63951829		50.00000000	0.68680000	5.94145309	1.089225
51	0.19928934	8.64643380	1.72314209		51.00000000	0.67333333	5.82193209	1.110616
52	0.20943579	8.65480040	1.81262496		52.00000000	0.66038462	5.71549703	1.131962
53	0.21925922	8.65385530	1.89743756		53.00000000	0.64792453	5.60704511	1.153334
54	0.22942576	8.64191630	1.98267821		54.00000000	0.63592593	5.49561862	1.174814
55	0.23923729	8.65514560	2.07063358		55.00000000	0.62436364	5.40395818	1.196186
56	0.24937481	8.64028740	2.15467003		56.00000000	0.61321429	5.29834767	1.217553
57	0.25950858	8.64621730	2.24376757		57.00000000	0.60245614	5.20896670	1.238928
58	0.26933873	8.65225700	2.33038791		58.00000000	0.59206897	5.12273285	1.260402
59	0.27948889	8.64515210	2.41622396		59.00000000	0.58203390	5.03177158	1.281806
60	0.28930637	8.65024280	2.50257034		60.00000000	0.57233333	4.95082230	1.303174
61	0.29945877	8.65109730	2.59064696		61.00000000	0.56295082	4.87014232	1.324547
62	0.30930156	8.65145110	2.67590732		62.00000000	0.55387097	4.79178759	1.346020
63	0.31944874	8.64329810	2.76109069		63.00000000	0.54507937	4.71128344	1.367394
64	0.32923794	8.65607360	2.84990784		64.00000000	0.53656250	4.64452449	1.388772
65	0.33940077	8.63171770	2.92961163		65.00000000	0.52830769	4.56020286	1.410127
66	0.34920856	8.65770720	3.02334546		66.00000000	0.52030303	4.50463129	1.431614
67	0.35936320	8.64706990	3.10743871		67.00000000	0.51253731	4.43194598	1.453004
68	0.36949030	8.64804650	3.19536930		68.00000000	0.50500000	4.36726348	1.474383
69	0.37935764	8.64912800	3.28111279		69.00000000	0.49768116	4.30450805	1.495861
70	0.38944751	8.64726160	3.36765450		70.00000000	0.49057143	4.24209948	1.517250
71	0.39930966	8.63923260	3.44972903		71.00000000	0.48366197	4.17846827	1.538606
72	0.40948513	8.64584640	3.54034554		72.00000000	0.47694444	4.12358841	1.559985
73	0.41929367	8.63249870	3.61955206		73.00000000	0.47041096	4.06082199	1.581467
74	0.42944235	8.65044780	3.71486863		74.00000000	0.46405405	4.01427537	1.602849
75	0.43924794	8.62048820	3.78653168		75.00000000	0.45786667	3.94703420	1.624196
76	0.44941521	8.62804990	3.87757686		76.00000000	0.45184211	3.89851623	1.645579
77	0.45954826	8.61760230	3.96020414		77.00000000	0.44597403	3.84322679	1.667052
78	0.46937096	8.61115550	4.04182632		78.00000000	0.44025641	3.79111641	1.688428
79	0.47954866	8.58286480	4.11590131		79.00000000	0.43468354	3.73083009	1.709781
80	0.48933637	8.58022310	4.19861523		80.00000000	0.42925000	3.68306077	1.731159
81	0.49949250	8.53313830	4.26223858		81.00000000	0.42395062	3.61762925	1.752632
82	0.50928766	8.49209210	4.32491771		82.00000000	0.41878049	3.55632247	1.774006
83	0.51942515	8.42440890	4.37584986		83.00000000	0.41373494	3.48547231	1.795360
84	0.52919650	8.34971140	4.41863805		84.00000000	0.40880952	3.41344154	1.816745
85	0.53935933	8.21599390	4.43137297		85.00000000	0.40400000	3.31926154	1.838232
86	0.54950351	8.03388880	4.41465009		86.00000000	0.39930233	3.20795048	1.859614
87	0.55928379	7.78610180	4.35464052		87.00000000	0.39471264	3.07327283	1.880983
88	0.56943023	7.42683940	4.22906687		88.00000000	0.39022727	2.89815528	1.902361
89	0.57921648	6.94595190	4.02320981		89.00000000	0.38584270	2.68004481	1.923835
90	0.58932567	6.28469990	3.70373498		90.00000000	0.38155556	2.39796216	1.945228
91	0.59911859	5.42679880	3.25129605		91.00000000	0.37736264	2.04787111	1.966593
92	0.60926282	4.31256250	2.62748399		92.00000000	0.37326087	1.60971083	1.988062
93	0.61902225	2.92165680	1.80857057		93.00000000	0.36924731	1.07881392	2.009580
94	0.62914193	1.17420780	0.73874336		94.00000000	0.36531915	0.42896059	2.031018
95	0.63917673	-0.92247593	-0.58962515		95.00000000	0.36147368	-0.33345077	2.052422
96	0.64893538	-3.27990600	-2.12844705		96.00000000	0.35770833	-1.17324971	2.073766
97	0.65903866	-6.13892560	-4.04578930		97.00000000	0.35402062	-2.17330624	2.095249
98	0.66900057	-9.31337830	-6.23065539		98.00000000	0.35040816	-3.26348378	2.116643
99	0.67096090	-9.99999240	-6.70960390		99.00000000	0.34686869	-3.46868423	2.138023
100	0.67093188	-9.99989890	-6.70925097		100.00000000	0.34340000	-3.43396528	2.159507
101	0.67089617	-9.99990370	-6.70889709		101.00000000	0.34000000	-3.39996726	2.180893
17:27 02/04/2018
Test Lot:	JK-PERC
Recipe:	Recipe_YJX-LID
Cell Name:	1-0-3h
Test Order:	5
Test Condition:	Light
1	-0.29994607	8.65536020	-2.59614128		1.00000000	34.34000000	297.22506927	0.000000
2	-0.29016632	8.65772530	-2.51218029		2.00000000	17.17000000	148.65314340	0.061729
3	-0.28004268	8.64947890	-2.42222325		3.00000000	11.44666667	99.00770181	0.083245
4	-0.27019590	8.65925220	-2.33969444		4.00000000	8.58500000	74.33968014	0.104645
5	-0.26005590	8.65168000	-2.24992043		5.00000000	6.86800000	59.41973824	0.125986
6	-0.24990399	8.65776160	-2.16360917		6.00000000	5.72333333	49.55125556	0.147365
7	-0.24006914	8.65209770	-2.07710165		7.00000000	4.90571429	42.44471929	0.168895
8	-0.22990903	8.64672370	-1.98795986		8.00000000	4.29250000	37.11606148	0.190297
9	-0.22009204	8.65431880	-1.90474668		9.00000000	3.81555556	33.02103418	0.211664
10	-0.20995650	8.66363140	-1.81898573		10.00000000	3.43400000	29.75091023	0.233035
11	-0.20012239	8.65391640	-1.73184243		11.00000000	3.12181818	27.01595356	0.254516
12	-0.18996526	8.64746480	-1.64271790		12.00000000	2.86166667	24.74616177	0.275895
13	-0.18015125	8.64059070	-1.55661322		13.00000000	2.64153846	22.82445266	0.297238
14	-0.17001720	8.65005780	-1.47065861		14.00000000	2.45285714	21.21735606	0.318623
15	-0.16020766	8.65345290	-1.38634944		15.00000000	2.28933333	19.81063817	0.340109
16	-0.15004383	8.65878770	-1.29919767		16.00000000	2.14625000	18.58392310	0.361478
17	-0.13990606	8.64712620	-1.20978536		17.00000000	2.02000000	17.46719492	0.382853
18	-0.13007419	8.65345290	-1.12559088		18.00000000	1.90777778	16.50886514	0.404222
19	-0.11993939	8.65220450	-1.03774013		19.00000000	1.80736842	15.63772119	0.425693
20	-0.11012686	8.63504790	-0.95095071		20.00000000	1.71700000	14.82637724	0.447082
21	-0.09996155	8.65727810	-0.86539493		21.00000000	1.63523810	14.15671095	0.468466
22	-0.09014009	8.64480970	-0.77924392		22.00000000	1.56090909	13.49376205	0.489823
23	-0.08001274	8.66159150	-0.69303766		23.00000000	1.49304348	12.93213270	0.511310
24	-0.07016226	8.65489100	-0.60724670		24.00000000	1.43083333	12.38370654	0.532690
25	-0.06001183	8.64724640	-0.51893708		25.00000000	1.37360000	11.87785766	0.554085
26	-0.04987852	8.64513680	-0.43120665		26.00000000	1.32076923	11.41823068	0.575555
27	-0.04008386	8.65327550	-0.34685668		27.00000000	1.27185185	11.00568447	0.596929
28	-0.02989473	8.65033820	-0.25859954		28.00000000	1.22642857	10.60902192	0.618288
29	-0.02007848	8.64898680	-0.17365854		29.00000000	1.18413793	10.24159333	0.639668
30	-0.00995783	8.64665700	-0.08610194		30.00000000	1.14466667	9.89754005	0.661163
31	-0.00068863	8.65261840	-0.00595841		31.00000000	1.10774194	9.58486825	0.682680
32	0.00944224	8.64920520	0.08166790		32.00000000	1.07312500	9.28167833	0.704053
33	0.01927533	8.65176870	0.16676568		33.00000000	1.04060606	9.00308294	0.725427
34	0.02941802	8.64724920	0.25438496		34.00000000	1.01000000	8.73372169	0.746912
35	0.03927046	8.64749150	0.33959094		35.00000000	0.98114286	8.48442452	0.768288
36	0.04936998	8.65398980	0.42724733		36.00000000	0.95388889	8.25494471	0.789636
37	0.05919712	8.65427020	0.51230785		37.00000000	0.92810811	8.03209834	0.811018
38	0.06935618	8.65176870	0.60005364		38.00000000	0.90368421	7.81846677	0.832508
39	0.07950036	8.64673710	0.68741873		39.00000000	0.88051282	7.61356287	0.853904
40	0.08931187	8.65135670	0.77266883		40.00000000	0.85850000	7.42718973	0.875261
41	0.09946349	8.65421870	0.86077882		41.00000000	0.83756098	7.24843586	0.896632
42	0.10926159	8.64945220	0.94505290		42.00000000	0.81761905	7.07195687	0.918109
43	0.11947127	8.64874840	1.03327696		43.00000000	0.79860465	6.90693070	0.939491
44	0.12923664	8.64545540	1.11730961		44.00000000	0.78045455	6.74738496	0.960836
45	0.13942845	8.64589410	1.20548361		45.00000000	0.76311111	6.59777785	0.982208
46	0.14923772	8.64609150	1.29032298		46.00000000	0.74652174	6.45449526	1.003694
47	0.15939753	8.64372160	1.37778787		47.00000000	0.73063830	6.31543404	1.025063
48	0.16951269	8.65046220	1.46636312		48.00000000	0.71541667	6.18868483	1.046430
49	0.17936215	8.64793210	1.55111169		49.00000000	0.70081633	6.06061201	1.067805
50	0.18950707	8.65104100	1.63943343		50.00000000	0.68680000	5.94153496	1.089272
51	0.19932304	8.64824770	1.72379502		51.00000000	0.67333333	5.82315345	1.110655
52	0.20941214	8.65024850	1.81146705		52.00000000	0.66038462	5.71249103	1.132040
53	0.21926533	8.64221570	1.89493828		53.00000000	0.64792453	5.59950353	1.153401
54	0.22942290	8.64617820	1.98363128		54.00000000	0.63592593	5.49832888	1.174874
55	0.23923515	8.64546390	2.06829885		55.00000000	0.62436364	5.39791328	1.196256
56	0.24936147	8.65349770	2.15784891		56.00000000	0.61321429	5.30644841	1.217652
57	0.25951013	8.64292530	2.24292667		57.00000000	0.60245614	5.20698342	1.239137
58	0.26933280	8.65111260	2.33002838		58.00000000	0.59206897	5.12205529	1.260513
59	0.27948663	8.64175510	2.41525501		59.00000000	0.58203390	5.02979441	1.281876
60	0.28930706	8.65598770	2.50423835		60.00000000	0.57233333	4.95411029	1.303275
61	0.29942968	8.64098450	2.58736722		61.00000000	0.56295082	4.86444931	1.324765
62	0.30926052	8.64724640	2.67425192		62.00000000	0.55387097	4.78945873	1.346141
63	0.31940693	8.63681890	2.75865981		63.00000000	0.54507937	4.70775176	1.367491
64	0.32923779	8.66595270	2.85315912		64.00000000	0.53656250	4.64982525	1.388876
65	0.33939910	8.63809390	2.93176130		65.00000000	0.52830769	4.56357145	1.410358
66	0.34918901	8.64414880	3.01844176		66.00000000	0.52030303	4.49757682	1.431750
67	0.35933468	8.65269180	3.10921224		67.00000000	0.51253731	4.43482741	1.453116
68	0.36948928	8.65749450	3.19885141		68.00000000	0.50500000	4.37203472	1.474495
69	0.37927845	8.63893320	3.27656119		69.00000000	0.49768116	4.29943429	1.496019
70	0.38944200	8.63576890	3.36313111		70.00000000	0.49057143	4.23646149	1.517403
71	0.39928624	8.64345070	3.45121093		71.00000000	0.48366197	4.18050841	1.538747
72	0.40942892	8.63562870	3.53567613		72.00000000	0.47694444	4.11871513	1.560119
73	0.41923448	8.64015010	3.62224883		73.00000000	0.47041096	4.06442129	1.581609
74	0.42940471	8.63235950	3.70677583		74.00000000	0.46405405	4.00588142	1.602986
75	0.43922663	8.62222770	3.78711202		75.00000000	0.45786667	3.94783066	1.624324
76	0.44939759	8.63153360	3.87899040		76.00000000	0.45184211	3.90009031	1.645704
77	0.45951352	8.61920550	3.96064146		77.00000000	0.44597403	3.84394178	1.667184
78	0.46937189	8.59811400	4.03571302		78.00000000	0.44025641	3.78537480	1.688630
79	0.47953022	8.57908340	4.11392975		79.00000000	0.43468354	3.72918638	1.709994
80	0.48932758	8.57154850	4.19429508		80.00000000	0.42925000	3.67933719	1.731358
81	0.49947175	8.52463630	4.25781501		81.00000000	0.42395062	3.61402482	1.752828
82	0.50930858	8.49769880	4.32795091		82.00000000	0.41878049	3.55867045	1.774198
83	0.51942670	8.42296600	4.37511343		83.00000000	0.41373494	3.48487533	1.795575
84	0.52922255	8.34432790	4.41600649		84.00000000	0.40880952	3.41124072	1.816950
85	0.53935409	8.20893100	4.42752051		85.00000000	0.40400000	3.31640812	1.838423
86	0.54946929	8.02750680	4.41086846		86.00000000	0.39930233	3.20540213	1.859806
87	0.55929637	7.77873230	4.35061674		87.00000000	0.39471264	3.07036399	1.881199
88	0.56941229	7.40908290	4.21882286		88.00000000	0.39022727	2.89122621	1.902696
89	0.57923573	6.92976520	4.01396760		89.00000000	0.38584270	2.67379929	1.924079
90	0.58934641	6.26447300	3.69194467		90.00000000	0.38155556	2.39024448	1.945442
91	0.59913033	5.42052600	3.24760153		91.00000000	0.37736264	2.04550399	1.966819
92	0.60924625	4.29630710	2.61750899		92.00000000	0.37326087	1.60364332	1.988360
93	0.61902130	2.92993380	1.81369143		93.00000000	0.36924731	1.08187018	2.009755
94	0.62908953	1.21522030	0.76448237		94.00000000	0.36531915	0.44394325	2.031102
95	0.63914442	-0.83144379	-0.53141266		95.00000000	0.36147368	-0.30054505	2.052476
96	0.64893657	-3.14674090	-2.04203525		96.00000000	0.35770833	-1.12561544	2.073965
97	0.65899295	-5.90809540	-3.89339322		97.00000000	0.35402062	-2.09158759	2.095342
98	0.66897041	-8.97481350	-6.00388467		98.00000000	0.35040816	-3.14484791	2.116701
99	0.67201370	-10.00004000	-6.72016388		99.00000000	0.34686869	-3.46870074	2.138073
100	0.67198837	-10.00001300	-6.71989244		100.00000000	0.34340000	-3.43400446	2.159593
101	0.67195565	-9.99993320	-6.71951161		101.00000000	0.34000000	-3.39997729	2.180995
