# Supplementary material for: Study on the Electrical Injection Regeneration of Industrialized B-Doped Czochralski Silicon PERC Solar Cells
Source: Hindawi journal article supplement (doi:10.1155/2019/5357370), 2019-06-20
Supplement: f1 [file 5357370.f1.zip › section3.2/IVRawData_1-0-4h.csv]

18:54 02/04/2018
Test Lot:	JK-PERC
Recipe:	Recipe_YJX-LID
Cell Name:	1-0-4h
Test Order:	2
Test Condition:	Light
1	-0.29987082	8.65105440	-2.59419878		1.00000000	34.34000000	297.07720810	0.000000
2	-0.29003796	8.66877270	-2.51427315		2.00000000	17.17000000	148.84282726	0.061766
3	-0.27989843	8.65708450	-2.42310436		3.00000000	11.44666667	99.09476058	0.083271
4	-0.27007228	8.64960960	-2.33601979		4.00000000	8.58500000	74.25689842	0.104708
5	-0.25994468	8.65964220	-2.25102792		5.00000000	6.86800000	59.47442263	0.126073
6	-0.24977539	8.66539190	-2.16440164		6.00000000	5.72333333	49.59492631	0.147450
7	-0.23994552	8.65407180	-2.07650576		7.00000000	4.90571429	42.45440366	0.168945
8	-0.22979634	8.66261290	-1.99063674		8.00000000	4.29250000	37.18426587	0.190331
9	-0.21998060	8.64751150	-1.90228477		9.00000000	3.81555556	32.99506055	0.211675
10	-0.20985746	8.66371820	-1.81814590		10.00000000	3.43400000	29.75120830	0.233044
11	-0.20000301	8.64261720	-1.72854945		11.00000000	3.12181818	26.98067951	0.254523
12	-0.18984342	8.66749100	-1.64546613		12.00000000	2.86166667	24.80347008	0.275914
13	-0.18011029	8.65461730	-1.55878563		13.00000000	2.64153846	22.86150447	0.297264
14	-0.16996258	8.65796850	-1.47153066		14.00000000	2.45285714	21.23675988	0.318648
15	-0.16010070	8.65277390	-1.38531516		15.00000000	2.28933333	19.80908372	0.340125
16	-0.14993216	8.65758990	-1.29805115		16.00000000	2.14625000	18.58135232	0.361541
17	-0.13976735	8.65058420	-1.20906923		17.00000000	2.02000000	17.47418008	0.382890
18	-0.12996873	8.64206310	-1.12319797		18.00000000	1.90777778	16.48713594	0.404265
19	-0.11982848	8.66371440	-1.03815973		19.00000000	1.80736842	15.65852382	0.425739
20	-0.11000678	8.65479760	-0.95208642		20.00000000	1.71700000	14.86028748	0.447096
21	-0.09986132	8.65651990	-0.86445147		21.00000000	1.63523810	14.15547111	0.468450
22	-0.09001432	8.65838620	-0.77937871		22.00000000	1.56090909	13.51495373	0.489827
23	-0.07989491	8.65392210	-0.69140431		23.00000000	1.49304348	12.92068195	0.511293
24	-0.07008512	8.65406040	-0.60652089		24.00000000	1.43083333	12.38251809	0.532686
25	-0.05989946	8.66869930	-0.51925044		25.00000000	1.37360000	11.90732536	0.554050
26	-0.04978005	8.63868810	-0.43003434		26.00000000	1.32076923	11.40971344	0.575432
27	-0.03996357	8.66987420	-0.34647909		27.00000000	1.27185185	11.02679556	0.596911
28	-0.02979727	8.63574120	-0.25732147		28.00000000	1.22642857	10.59111974	0.618291
29	-0.01998748	8.65931220	-0.17307782		29.00000000	1.18413793	10.25382003	0.639658
30	-0.00987700	8.64423080	-0.08537904		30.00000000	1.14466667	9.89476286	0.661021
31	-0.00064999	8.66274170	-0.00563072		31.00000000	1.10774194	9.59608226	0.682610
32	0.00947889	8.65651510	0.08205414		32.00000000	1.07312500	9.28952277	0.703991
33	0.01932487	8.65035530	0.16716695		33.00000000	1.04060606	9.00161215	0.725379
34	0.02945664	8.66019820	0.25510036		34.00000000	1.01000000	8.74680018	0.746718
35	0.03925350	8.64476490	0.33933724		35.00000000	0.98114286	8.48174933	0.768218
36	0.04943961	8.65509510	0.42790448		36.00000000	0.95388889	8.25599905	0.789622
37	0.05926548	8.64483170	0.51234013		37.00000000	0.92810811	8.02333839	0.811005
38	0.06939354	8.65878680	0.60086385		38.00000000	0.90368421	7.82480891	0.832485
39	0.07954764	8.66224580	0.68906125		39.00000000	0.88051282	7.62721848	0.853875
40	0.08935566	8.64811420	0.77275797		40.00000000	0.85850000	7.42440604	0.875226
41	0.09948149	8.65939520	0.86144950		41.00000000	0.83756098	7.25277149	0.896605
42	0.10933267	8.65524010	0.94630051		42.00000000	0.81761905	7.07668917	0.918094
43	0.11945998	8.65368840	1.03376944		43.00000000	0.79860465	6.91087581	0.939468
44	0.12928660	8.65844630	1.11942108		44.00000000	0.78045455	6.75752377	0.960808
45	0.13946602	8.64849470	1.20617113		45.00000000	0.76311111	6.59976240	0.982196
46	0.14924128	8.65702440	1.29198540		46.00000000	0.74652174	6.46265691	1.003681
47	0.15940730	8.64764210	1.37849728		47.00000000	0.73063830	6.31829850	1.025083
48	0.16954280	8.66192050	1.46856625		48.00000000	0.71541667	6.19688229	1.046432
49	0.17939474	8.65838430	1.55326860		49.00000000	0.70081633	6.06793708	1.067805
50	0.18952873	8.64423560	1.63833100		50.00000000	0.68680000	5.93686101	1.089277
51	0.19930103	8.65611460	1.72517256		51.00000000	0.67333333	5.82845050	1.110656
52	0.20946333	8.65230940	1.81234154		52.00000000	0.66038462	5.71385202	1.132001
53	0.21929739	8.64478300	1.89577835		53.00000000	0.64792453	5.60116695	1.153385
54	0.22943661	8.65028860	1.98469289		54.00000000	0.63592593	5.50094279	1.174864
55	0.23927738	8.64842130	2.06937159		55.00000000	0.62436364	5.39975977	1.196237
56	0.24939203	8.65260980	2.15789192		56.00000000	0.61321429	5.30590394	1.217592
57	0.25954539	8.64739130	2.24439055		57.00000000	0.60245614	5.20967399	1.238962
58	0.26936531	8.64378830	2.32833672		58.00000000	0.59206897	5.11771880	1.260433
59	0.27954921	8.64886670	2.41778385		59.00000000	0.58203390	5.03393360	1.281838
60	0.28936541	8.64650730	2.50200013		60.00000000	0.57233333	4.94868434	1.303200
61	0.29948527	8.66615580	2.59538601		61.00000000	0.56295082	4.87861951	1.324573
62	0.30931935	8.64493850	2.67404676		62.00000000	0.55387097	4.78818045	1.346046
63	0.31944814	8.64298730	2.76098622		63.00000000	0.54507937	4.71111403	1.367423
64	0.32928815	8.65983580	2.85158131		64.00000000	0.53656250	4.64654315	1.388810
65	0.33943707	8.65513320	2.93787305		65.00000000	0.52830769	4.57257345	1.410159
66	0.34924880	8.63987830	3.01746713		66.00000000	0.52030303	4.49535486	1.431647
67	0.35938951	8.65520670	3.11059049		67.00000000	0.51253731	4.43611639	1.453033
68	0.36955479	8.64393520	3.19440766		68.00000000	0.50500000	4.36518728	1.474420
69	0.37937841	8.64556410	3.27994036		69.00000000	0.49768116	4.30273437	1.495900
70	0.38948488	8.65199950	3.36982299		70.00000000	0.49057143	4.24442375	1.517285
71	0.39933532	8.64072800	3.45054788		71.00000000	0.48366197	4.17919154	1.538647
72	0.40948945	8.64523890	3.54013412		72.00000000	0.47694444	4.12329866	1.560030
73	0.41931903	8.65172860	3.62783444		73.00000000	0.47041096	4.06986795	1.581519
74	0.42943668	8.63117500	3.70654314		74.00000000	0.46405405	4.00533175	1.602889
75	0.43923131	8.63554100	3.79299999		75.00000000	0.45786667	3.95392637	1.624244
76	0.44942039	8.61751270	3.87288592		76.00000000	0.45184211	3.89375508	1.645618
77	0.45955142	8.62782960	3.96493134		77.00000000	0.44597403	3.84778790	1.667100
78	0.46943238	8.60052010	4.03736262		78.00000000	0.44025641	3.78643411	1.688496
79	0.47956118	8.60103890	4.12472436		79.00000000	0.43468354	3.73873007	1.709842
80	0.48933643	8.56624220	4.19177438		80.00000000	0.42925000	3.67705946	1.731210
81	0.49953446	8.54279610	4.26742104		81.00000000	0.42395062	3.62172368	1.752696
82	0.50931793	8.47446820	4.31619860		82.00000000	0.41878049	3.54894193	1.774079
83	0.51945788	8.41683290	4.37219017		83.00000000	0.41373494	3.48233785	1.795437
84	0.52922648	8.33053680	4.40874067		84.00000000	0.40880952	3.40560278	1.816817
85	0.53938055	8.17391680	4.40885174		85.00000000	0.40400000	3.30226239	1.838289
86	0.54952794	7.99359700	4.39270489		86.00000000	0.39930233	3.19186187	1.859669
87	0.55934417	7.71499300	4.31533636		87.00000000	0.39471264	3.04520528	1.881032
88	0.56945288	7.34473180	4.18247868		88.00000000	0.39022727	2.86611466	1.902411
89	0.57922816	6.85081580	3.96818543		89.00000000	0.38584270	2.64333724	1.923892
90	0.58931303	6.15861370	3.62935130		90.00000000	0.38155556	2.34985327	1.945269
91	0.59914339	5.29592560	3.17301882		91.00000000	0.37736264	1.99848445	1.966628
92	0.60927367	4.16197440	2.53578142		92.00000000	0.37326087	1.55350218	1.988099
93	0.61906230	2.78777410	1.72580585		93.00000000	0.36924731	1.02937809	2.009606
94	0.62915391	1.07978440	0.67935058		94.00000000	0.36531915	0.39446592	2.031046
95	0.63921869	-0.94321543	-0.60292093		95.00000000	0.36147368	-0.34094756	2.052455
96	0.64896643	-3.19643140	-2.07437667		96.00000000	0.35770833	-1.14339015	2.073806
97	0.65906024	-5.88571210	-3.87903883		97.00000000	0.35402062	-2.08366344	2.095287
98	0.66902828	-8.82565780	-5.90461466		98.00000000	0.35040816	-3.09258254	2.116680
99	0.67268938	-10.00016900	-6.72700748		99.00000000	0.34686869	-3.46874549	2.138050
100	0.67261571	-10.00011500	-6.72623445		100.00000000	0.34340000	-3.43403949	2.159535
101	0.67261940	-10.00008500	-6.72625117		101.00000000	0.34000000	-3.40002890	2.180926
18:54 02/04/2018
Test Lot:	JK-PERC
Recipe:	Recipe_YJX-LID
Cell Name:	1-0-4h
Test Order:	3
Test Condition:	Light
1	-0.29987317	8.65830330	-2.59639286		1.00000000	34.34000000	297.32613532	0.000000
2	-0.29004237	8.66008760	-2.51179233		2.00000000	17.17000000	148.69370409	0.061726
3	-0.27991980	8.65002250	-2.42131257		3.00000000	11.44666667	99.01392422	0.083093
4	-0.27009869	8.64505960	-2.33501927		4.00000000	8.58500000	74.21783667	0.104593
5	-0.25992477	8.68175030	-2.25660195		5.00000000	6.86800000	59.62626106	0.126034
6	-0.24981038	8.63291070	-2.15659070		6.00000000	5.72333333	49.40902557	0.147435
7	-0.23997140	8.65919110	-2.07795821		7.00000000	4.90571429	42.47951748	0.168783
8	-0.22980788	8.65899750	-1.98990586		8.00000000	4.29250000	37.16874677	0.190267
9	-0.21997337	8.66051770	-1.90508326		9.00000000	3.81555556	33.04468642	0.211642
10	-0.20988056	8.64956190	-1.81537490		10.00000000	3.43400000	29.70259556	0.233032
11	-0.20002371	8.65261270	-1.73072769		11.00000000	3.12181818	27.01188365	0.254432
12	-0.18989669	8.66387940	-1.64524202		12.00000000	2.86166667	24.79313488	0.275901
13	-0.18011798	8.65075870	-1.55815718		13.00000000	2.64153846	22.85131183	0.297289
14	-0.16997755	8.66419410	-1.47271849		14.00000000	2.45285714	21.25203039	0.318681
15	-0.16016759	8.64840030	-1.38519343		15.00000000	2.28933333	19.79907109	0.340037
16	-0.15000260	8.65365890	-1.29807133		16.00000000	2.14625000	18.57291541	0.361513
17	-0.13987929	8.65440850	-1.21057252		17.00000000	2.02000000	17.48190517	0.382904
18	-0.13002838	8.65710160	-1.12566890		18.00000000	1.90777778	16.51582605	0.404264
19	-0.11991847	8.64470390	-1.03665967		19.00000000	1.80736842	15.62416484	0.425631
20	-0.11005790	8.66191010	-0.95331164		20.00000000	1.71700000	14.87249964	0.447119
21	-0.09989960	8.65725040	-0.86485583		21.00000000	1.63523810	14.15666565	0.468489
22	-0.09012537	8.64507770	-0.77914080		22.00000000	1.56090909	13.49418037	0.489880
23	-0.07995293	8.65891460	-0.69230555		23.00000000	1.49304348	12.92813597	0.511225
24	-0.07014148	8.64378170	-0.60628763		24.00000000	1.43083333	12.36781098	0.532684
25	-0.05996904	8.65086360	-0.51878399		25.00000000	1.37360000	11.88282624	0.554054
26	-0.04983605	8.64965250	-0.43106452		26.00000000	1.32076923	11.42419488	0.575438
27	-0.04002163	8.64217570	-0.34587394		27.00000000	1.27185185	10.99156717	0.596922
28	-0.02984621	8.65779970	-0.25840253		28.00000000	1.22642857	10.61817292	0.618292
29	-0.01999755	8.65051650	-0.17298910		29.00000000	1.18413793	10.24340471	0.639652
30	-0.00987647	8.66097830	-0.08553987		30.00000000	1.14466667	9.91393316	0.661042
31	-0.00070735	8.63364320	-0.00610705		31.00000000	1.10774194	9.56384863	0.682644
32	0.00948572	8.65756420	0.08212320		32.00000000	1.07312500	9.29064858	0.704029
33	0.01930284	8.64386840	0.16685120		33.00000000	1.04060606	8.99486184	0.725377
34	0.02944373	8.64578530	0.25456415		34.00000000	1.01000000	8.73224315	0.746755
35	0.03926159	8.64944170	0.33959087		35.00000000	0.98114286	8.48633794	0.768239
36	0.04940769	8.65085890	0.42741896		36.00000000	0.95388889	8.25195818	0.789621
37	0.05923524	8.65235420	0.51252426		37.00000000	0.92810811	8.03032009	0.810973
38	0.06937464	8.65046020	0.60012253		38.00000000	0.90368421	7.81728430	0.832341
39	0.07954752	8.65131950	0.68819105		39.00000000	0.88051282	7.61759773	0.853809
40	0.08936763	8.64222910	0.77233552		40.00000000	0.85850000	7.41935368	0.875188
41	0.09949363	8.65360070	0.86097815		41.00000000	0.83756098	7.24791824	0.896555
42	0.10929661	8.63703440	0.94399858		42.00000000	0.81761905	7.06180384	0.917931
43	0.11947099	8.64902310	1.03330735		43.00000000	0.79860465	6.90715008	0.939417
44	0.12925760	8.64787480	1.11780354		44.00000000	0.78045455	6.74927320	0.960803
45	0.13940072	8.64784340	1.20551560		45.00000000	0.76311111	6.59926539	0.982144
46	0.14925878	8.65262410	1.29148012		46.00000000	0.74652174	6.45937199	1.003513
47	0.15938775	8.65150170	1.37894339		47.00000000	0.73063830	6.32111848	1.024992
48	0.16951004	8.65093710	1.46642069		48.00000000	0.71541667	6.18902458	1.046369
49	0.17933832	8.64973550	1.55122903		49.00000000	0.70081633	6.06187586	1.067730
50	0.18949783	8.64698030	1.63858400		50.00000000	0.68680000	5.93874607	1.089101
51	0.19924127	8.64950370	1.72333810		51.00000000	0.67333333	5.82399916	1.110577
52	0.20942308	8.65766910	1.81311573		52.00000000	0.66038462	5.71739148	1.132013
53	0.21925583	8.66367240	1.89956068		53.00000000	0.64792453	5.61340585	1.153400
54	0.22936845	8.64271350	1.98236580		54.00000000	0.63592593	5.49612559	1.174740
55	0.23921013	8.65261750	2.06979376		55.00000000	0.62436364	5.40237973	1.196205
56	0.24934357	8.64726450	2.15613980		56.00000000	0.61321429	5.30262612	1.217576
57	0.25949934	8.65889740	2.24697816		57.00000000	0.60245614	5.21660591	1.238958
58	0.26933655	8.63694100	2.32624389		58.00000000	0.59206897	5.11366472	1.260439
59	0.27947000	8.65064330	2.41759528		59.00000000	0.58203390	5.03496764	1.281823
60	0.28932956	8.65375420	2.50378690		60.00000000	0.57233333	4.95283199	1.303163
61	0.29946002	8.64418030	2.58858641		61.00000000	0.56295082	4.86624839	1.324549
62	0.30929056	8.65078070	2.67560481		62.00000000	0.55387097	4.79141628	1.346024
63	0.31944633	8.64725590	2.76233416		63.00000000	0.54507937	4.71344076	1.367404
64	0.32924855	8.64735130	2.84712788		64.00000000	0.53656250	4.63984443	1.388782
65	0.33940580	8.64497950	2.93415618		65.00000000	0.52830769	4.56720917	1.410159
66	0.34923783	8.65281490	3.02189030		66.00000000	0.52030303	4.50208581	1.431629
67	0.35939062	8.65361600	3.11002842		67.00000000	0.51253731	4.43530110	1.453009
68	0.36953822	8.64235590	3.19368082		68.00000000	0.50500000	4.36438973	1.474365
69	0.37938586	8.64716430	3.28061186		69.00000000	0.49768116	4.30353075	1.495743
70	0.38951260	8.64376830	3.36685666		70.00000000	0.49057143	4.24038576	1.517233
71	0.39932749	8.63960460	3.45003162		71.00000000	0.48366197	4.17864820	1.538604
72	0.40946540	8.64380170	3.53933772		72.00000000	0.47694444	4.12261320	1.559999
73	0.41928551	8.62681580	3.61709886		73.00000000	0.47041096	4.05814869	1.581384
74	0.42944649	8.62993340	3.70609461		74.00000000	0.46405405	4.00475558	1.602866
75	0.43927401	8.62663560	3.78945681		75.00000000	0.45786667	3.94984889	1.624266
76	0.44940746	8.61373900	3.87107857		76.00000000	0.45184211	3.89204996	1.645615
77	0.45957291	8.60476590	3.95451730		77.00000000	0.44597403	3.83750209	1.666990
78	0.46941534	8.60816000	4.04080235		78.00000000	0.44025641	3.78979762	1.688476
79	0.47955325	8.59166720	4.12016193		79.00000000	0.43468354	3.73465635	1.709849
80	0.48935997	8.56226920	4.19003180		80.00000000	0.42925000	3.67535405	1.731249
81	0.49945769	8.53575990	4.26325092		81.00000000	0.42395062	3.61874068	1.752613
82	0.50928521	8.47061060	4.31395670		82.00000000	0.41878049	3.54732644	1.774093
83	0.51941121	8.42995260	4.37861188		83.00000000	0.41373494	3.48776593	1.795483
84	0.52918965	8.31726170	4.40140881		84.00000000	0.40880952	3.40017579	1.816863
85	0.53937447	8.18665890	4.41567481		85.00000000	0.40400000	3.30741020	1.838200
86	0.54949373	7.99310920	4.39216339		86.00000000	0.39930233	3.19166709	1.859665
87	0.55929750	7.72943450	4.32305339		87.00000000	0.39471264	3.05090553	1.881056
88	0.56941974	7.34808640	4.18414545		88.00000000	0.39022727	2.86742372	1.902432
89	0.57920039	6.86461160	3.97598572		89.00000000	0.38584270	2.64866025	1.923920
90	0.58931452	6.16436530	3.63274998		90.00000000	0.38155556	2.35204783	1.945298
91	0.59914428	5.30437140	3.17808378		91.00000000	0.37736264	2.00167158	1.966646
92	0.60924202	4.16192290	2.53561831		92.00000000	0.37326087	1.55348296	1.988129
93	0.61901146	2.79127740	1.72783270		93.00000000	0.36924731	1.03067168	2.009633
94	0.62914717	1.06937610	0.67279495		94.00000000	0.36531915	0.39066357	2.031016
95	0.63918757	-0.95669413	-0.61150700		95.00000000	0.36147368	-0.34581975	2.052370
96	0.64894366	-3.23050760	-2.09641743		96.00000000	0.35770833	-1.15557949	2.073750
97	0.65905327	-5.94374940	-3.91724748		97.00000000	0.35402062	-2.10420984	2.095226
98	0.66900218	-8.91489410	-5.96408359		98.00000000	0.35040816	-3.12385167	2.116598
99	0.67235219	-10.00017700	-6.72364091		99.00000000	0.34686869	-3.46874826	2.138014
100	0.67232984	-10.00014600	-6.72339656		100.00000000	0.34340000	-3.43405014	2.159414
101	0.67228818	-10.00012400	-6.72296516		101.00000000	0.34000000	-3.40004216	2.180902
18:54 02/04/2018
Test Lot:	JK-PERC
Recipe:	Recipe_YJX-LID
Cell Name:	1-0-4h
Test Order:	4
Test Condition:	Light
1	-0.29988399	8.64548970	-2.59264395		1.00000000	34.34000000	296.88611630	0.000000
2	-0.28999883	8.65534880	-2.51004103		2.00000000	17.17000000	148.61233890	0.061730
3	-0.27987701	8.64664940	-2.41999838		3.00000000	11.44666667	98.97531347	0.083111
4	-0.27007669	8.66755490	-2.34090454		4.00000000	8.58500000	74.41095882	0.104615
5	-0.25989681	8.65136050	-2.24846100		5.00000000	6.86800000	59.41754391	0.125997
6	-0.24975933	8.65225790	-2.16098214		6.00000000	5.72333333	49.51975605	0.147388
7	-0.23992555	8.64414120	-2.07395033		7.00000000	4.90571429	42.40568697	0.168739
8	-0.22978286	8.66766170	-1.99168009		8.00000000	4.29250000	37.20593785	0.190216
9	-0.21995503	8.64399430	-1.90129003		9.00000000	3.81555556	32.98164047	0.211664
10	-0.20982426	8.66039850	-1.81716171		10.00000000	3.43400000	29.73980845	0.233072
11	-0.20003365	8.65181060	-1.73065325		11.00000000	3.12181818	27.00937964	0.254565
12	-0.18983886	8.65737820	-1.64350681		12.00000000	2.86166667	24.77453062	0.275934
13	-0.18009365	8.66039560	-1.55968225		13.00000000	2.64153846	22.87676807	0.297291
14	-0.16992790	8.65495970	-1.47071913		14.00000000	2.45285714	21.22937972	0.318664
15	-0.16012909	8.64826110	-1.38483818		15.00000000	2.28933333	19.79875241	0.340142
16	-0.14997375	8.65729620	-1.29836718		16.00000000	2.14625000	18.58072197	0.361520
17	-0.13985415	8.64717010	-1.20934262		17.00000000	2.02000000	17.46728360	0.382859
18	-0.13002408	8.65509320	-1.12537053		18.00000000	1.90777778	16.51199447	0.404241
19	-0.11985163	8.66221900	-1.03818107		19.00000000	1.80736842	15.65582108	0.425710
20	-0.11004315	8.65359310	-0.95226864		20.00000000	1.71700000	14.85821935	0.447135
21	-0.09988484	8.64771560	-0.86377567		21.00000000	1.63523810	14.14107399	0.468521
22	-0.09005626	8.65188790	-0.77915669		22.00000000	1.56090909	13.50481048	0.489904
23	-0.07992177	8.64540580	-0.69095611		23.00000000	1.49304348	12.90796675	0.511381
24	-0.07010584	8.64229390	-0.60587530		24.00000000	1.43083333	12.36568219	0.532763
25	-0.05995796	8.66429230	-0.51949325		25.00000000	1.37360000	11.90127190	0.554109
26	-0.04981230	8.64891910	-0.43082254		26.00000000	1.32076923	11.42322623	0.575478
27	-0.03996288	8.65186790	-0.34575353		27.00000000	1.27185185	11.00389421	0.596953
28	-0.02984179	8.65455910	-0.25826750		28.00000000	1.22642857	10.61419855	0.618323
29	-0.02003479	8.65112300	-0.17332343		29.00000000	1.18413793	10.24412289	0.639660
30	-0.00986383	8.65427210	-0.08536425		30.00000000	1.14466667	9.90625680	0.661042
31	-0.00063293	8.65475940	-0.00547783		31.00000000	1.10774194	9.58723993	0.682629
32	0.00951326	8.64569470	0.08224877		32.00000000	1.07312500	9.27791112	0.704026
33	0.01933263	8.65905000	0.16740223		33.00000000	1.04060606	9.01065991	0.725397
34	0.02946386	8.64521220	0.25472130		34.00000000	1.01000000	8.73166432	0.746758
35	0.03928546	8.65568070	0.34004239		35.00000000	0.98114286	8.49245929	0.768237
36	0.04944422	8.65136530	0.42776002		36.00000000	0.95388889	8.25244123	0.789608
37	0.05926433	8.64846130	0.51254528		37.00000000	0.92810811	8.02670706	0.810981
38	0.06939407	8.65635200	0.60069947		38.00000000	0.90368421	7.82260862	0.832340
39	0.07953869	8.64615060	0.68770347		39.00000000	0.88051282	7.61304645	0.853810
40	0.08937146	8.64930630	0.77300111		40.00000000	0.85850000	7.42542946	0.875188
41	0.09952799	8.64957620	0.86087489		41.00000000	0.83756098	7.24454748	0.896581
42	0.10930791	8.64927100	0.94543374		42.00000000	0.81761905	7.07180872	0.918051
43	0.11950314	8.65394020	1.03417303		43.00000000	0.79860465	6.91107689	0.939422
44	0.12930763	8.64373020	1.11770027		44.00000000	0.78045455	6.74603852	0.960790
45	0.13943736	8.64897920	1.20599083		45.00000000	0.76311111	6.60013213	0.982160
46	0.14929245	8.64827630	1.29112236		46.00000000	0.74652174	6.45612626	1.003628
47	0.15937530	8.65125370	1.37879615		47.00000000	0.73063830	6.32093728	1.024996
48	0.16957128	8.64927770	1.46666909		48.00000000	0.71541667	6.18783742	1.046339
49	0.17937948	8.63771920	1.54942958		49.00000000	0.70081633	6.05345464	1.067716
50	0.18951443	8.65662860	1.64055603		50.00000000	0.68680000	5.94537252	1.089191
51	0.19928169	8.65697100	1.72517581		51.00000000	0.67333333	5.82902714	1.110554
52	0.20944865	8.65200810	1.81215142		52.00000000	0.66038462	5.71365304	1.131915
53	0.21925983	8.65324780	1.89730964		53.00000000	0.64792453	5.60665150	1.153329
54	0.22942677	8.64866830	1.98423603		54.00000000	0.63592593	5.49991240	1.174810
55	0.23922977	8.65185930	2.06978231		55.00000000	0.62436364	5.40190633	1.196203
56	0.24938408	8.64547250	2.15604321		56.00000000	0.61321429	5.30152724	1.217570
57	0.25953910	8.65132050	2.24535594		57.00000000	0.60245614	5.21204116	1.238941
58	0.26935998	8.65739350	2.33195534		58.00000000	0.59206897	5.12577401	1.260437
59	0.27950981	8.65235330	2.41841763		59.00000000	0.58203390	5.03596292	1.281809
60	0.28933886	8.64292620	2.50073441		60.00000000	0.57233333	4.94663476	1.303165
61	0.29949760	8.64671610	2.58967072		61.00000000	0.56295082	4.86767592	1.324538
62	0.30928719	8.64309310	2.67319798		62.00000000	0.55387097	4.78715834	1.346017
63	0.31944746	8.64962010	2.76309917		63.00000000	0.54507937	4.71472943	1.367410
64	0.32927948	8.64510540	2.84665581		64.00000000	0.53656250	4.63863937	1.388771
65	0.33944419	8.65069580	2.93642843		65.00000000	0.52830769	4.57022913	1.410129
66	0.34922114	8.63987730	3.01722780		66.00000000	0.52030303	4.49535434	1.431604
67	0.35939404	8.65025040	3.10884844		67.00000000	0.51253731	4.43357610	1.452980
68	0.36957291	8.63677980	3.19191984		68.00000000	0.50500000	4.36157380	1.474361
69	0.37939525	8.64709950	3.28066848		69.00000000	0.49768116	4.30349850	1.495715
70	0.38952276	8.63759610	3.36454027		70.00000000	0.49057143	4.23735786	1.517189
71	0.39933616	8.64010720	3.45030723		71.00000000	0.48366197	4.17889129	1.538570
72	0.40950683	8.63452340	3.53589631		72.00000000	0.47694444	4.11818797	1.559960
73	0.41931355	8.63660140	3.62144399		73.00000000	0.47041096	4.06275195	1.581444
74	0.42947084	8.63382430	3.70797577		74.00000000	0.46405405	4.00656117	1.602833
75	0.43927902	8.62972930	3.79085903		75.00000000	0.45786667	3.95126539	1.624175
76	0.44941697	8.62252620	3.87510960		76.00000000	0.45184211	3.89602039	1.645552
77	0.45957124	8.61170580	3.95769231		77.00000000	0.44597403	3.84059711	1.667038
78	0.46942189	8.61194230	4.04263423		78.00000000	0.44025641	3.79146280	1.688411
79	0.47954044	8.59666630	4.12244914		79.00000000	0.43468354	3.73682938	1.709775
80	0.48936057	8.55748560	4.18769603		80.00000000	0.42925000	3.67330069	1.731158
81	0.49948436	8.53713890	4.26416736		81.00000000	0.42395062	3.61932531	1.752635
82	0.50931787	8.48109820	4.31957487		82.00000000	0.41878049	3.55171844	1.774009
83	0.51946992	8.41733260	4.37255109		83.00000000	0.41373494	3.48254460	1.795372
84	0.52922899	8.32123850	4.40384065		84.00000000	0.40880952	3.40180155	1.816741
85	0.53938258	8.17845150	4.41131427		85.00000000	0.40400000	3.30409441	1.838208
86	0.54951602	7.99337580	4.39248806		86.00000000	0.39930233	3.19177355	1.859586
87	0.55931675	7.73145200	4.32433061		87.00000000	0.39471264	3.05170186	1.880931
88	0.56942713	7.34166190	4.18054147		88.00000000	0.39022727	2.86491670	1.902304
89	0.57925916	6.85500810	3.97082623		89.00000000	0.38584270	2.64495481	1.923789
90	0.58931673	6.16031690	3.63037781		90.00000000	0.38155556	2.35050314	1.945165
91	0.59914875	5.30164960	3.17647673		91.00000000	0.37736264	2.00064448	1.966544
92	0.60924202	4.14771270	2.52696086		92.00000000	0.37326087	1.54817885	1.988014
93	0.61904204	2.78206440	1.72221482		93.00000000	0.36924731	1.02726980	2.009520
94	0.62914050	1.06361270	0.66916183		94.00000000	0.36531915	0.38855809	2.030904
95	0.63920027	-0.96517062	-0.61693732		95.00000000	0.36147368	-0.34888378	2.052267
96	0.64898986	-3.24084120	-2.10327308		96.00000000	0.35770833	-1.15927590	2.073620
97	0.65907645	-5.94920300	-3.92097959		97.00000000	0.35402062	-2.10614053	2.095099
98	0.66901714	-8.93793300	-5.97963037		98.00000000	0.35040816	-3.13192469	2.116474
99	0.67228377	-10.00019500	-6.72296880		99.00000000	0.34686869	-3.46875451	2.137850
100	0.67228752	-10.00018600	-6.72300025		100.00000000	0.34340000	-3.43406387	2.159210
101	0.67228377	-10.00003200	-6.72285921		101.00000000	0.34000000	-3.40001088	2.180686
