# Supplementary material for: Study on the Electrical Injection Regeneration of Industrialized B-Doped Czochralski Silicon PERC Solar Cells
Source: Hindawi journal article supplement (doi:10.1155/2019/5357370), 2019-06-20
Supplement: f1 [file 5357370.f1.zip › section3.2/IVRawData_1-0-5h.csv]

19:57 02/04/2018
Test Lot:	JK-PERC
Recipe:	Recipe_YJX-LID
Cell Name:	1-0-5h
Test Order:	2
Test Condition:	Light
1	-0.29979455	8.66185470	-2.59677683		1.00000000	34.34000000	297.44809040	0.000000
2	-0.29001221	8.64298060	-2.50656990		2.00000000	17.17000000	148.39997690	0.061808
3	-0.27988151	8.65069010	-2.42116821		3.00000000	11.44666667	99.02156601	0.083244
4	-0.27008054	8.66533570	-2.34033855		4.00000000	8.58500000	74.39190698	0.104748
5	-0.25990146	8.64560890	-2.24700638		5.00000000	6.86800000	59.37804193	0.126136
6	-0.24975367	8.65586380	-2.16183375		6.00000000	5.72333333	49.54039382	0.147489
7	-0.23994154	8.64650150	-2.07465489		7.00000000	4.90571429	42.41726593	0.168867
8	-0.22977884	8.65330220	-1.98834574		8.00000000	4.29250000	37.14429969	0.190364
9	-0.21993545	8.65480900	-1.90349931		9.00000000	3.81555556	33.02290456	0.211731
10	-0.20983008	8.66239550	-1.81763114		10.00000000	3.43400000	29.74666615	0.233081
11	-0.19998221	8.65707020	-1.73126003		11.00000000	3.12181818	27.02579915	0.254457
12	-0.18981653	8.65686510	-1.64321609		12.00000000	2.86166667	24.77306229	0.275939
13	-0.18005875	8.65817640	-1.55898042		13.00000000	2.64153846	22.87090597	0.297317
14	-0.16990945	8.65109250	-1.46990237		14.00000000	2.45285714	21.21989403	0.318677
15	-0.16009061	8.64704700	-1.38431103		15.00000000	2.28933333	19.79597293	0.340050
16	-0.14993834	8.67062760	-1.30005951		16.00000000	2.14625000	18.60933449	0.361535
17	-0.13976969	8.63927360	-1.20750859		17.00000000	2.02000000	17.45133267	0.382917
18	-0.12995236	8.66273780	-1.12574322		18.00000000	1.90777778	16.52657867	0.404309
19	-0.11977551	8.64543340	-1.03551119		19.00000000	1.80736842	15.62548331	0.425650
20	-0.10998497	8.66143890	-0.95262810		20.00000000	1.71700000	14.87169059	0.447123
21	-0.09979548	8.64525700	-0.86275760		21.00000000	1.63523810	14.13705359	0.468501
22	-0.08999302	8.66323660	-0.77963084		22.00000000	1.56090909	13.52252477	0.489879
23	-0.07987127	8.65241430	-0.69107929		23.00000000	1.49304348	12.91843074	0.511422
24	-0.07003904	8.65595530	-0.60625481		24.00000000	1.43083333	12.38522938	0.532812
25	-0.05991282	8.65068340	-0.51828680		25.00000000	1.37360000	11.88257872	0.554159
26	-0.04972481	8.65504260	-0.43037038		26.00000000	1.32076923	11.43131396	0.575533
27	-0.03992162	8.65791320	-0.34563788		27.00000000	1.27185185	11.01158294	0.597014
28	-0.02978274	8.65067010	-0.25764065		28.00000000	1.22642857	10.60942897	0.618395
29	-0.01994009	8.64933680	-0.17246856		29.00000000	1.18413793	10.24200778	0.639755
30	-0.00981536	8.65519810	-0.08495385		30.00000000	1.14466667	9.90731676	0.661127
31	-0.00064333	8.65826320	-0.00557008		31.00000000	1.10774194	9.59112124	0.682717
32	0.00949758	8.65726090	0.08222300		32.00000000	1.07312500	9.29032310	0.704103
33	0.01930645	8.65184690	0.16703644		33.00000000	1.04060606	9.00316432	0.725449
34	0.02945248	8.65044980	0.25477722		34.00000000	1.01000000	8.73695430	0.746819
35	0.03927624	8.65442850	0.33991340		35.00000000	0.98114286	8.49123071	0.768308
36	0.04942972	8.65636920	0.42788186		36.00000000	0.95388889	8.25721440	0.789695
37	0.05923338	8.64217280	0.51190510		37.00000000	0.92810811	8.02087065	0.811034
38	0.06940769	8.64949890	0.60034177		38.00000000	0.90368421	7.81641558	0.832411
39	0.07956712	8.65182020	0.68840041		39.00000000	0.88051282	7.61803861	0.853893
40	0.08934846	8.65583710	0.77338570		40.00000000	0.85850000	7.43103615	0.875276
41	0.09951756	8.64898970	0.86072636		41.00000000	0.83756098	7.24405625	0.896636
42	0.10933387	8.65416150	0.94619297		42.00000000	0.81761905	7.07580728	0.918008
43	0.11948214	8.65889740	1.03458359		43.00000000	0.79860465	6.91503574	0.939483
44	0.12928505	8.65483570	1.11894087		44.00000000	0.78045455	6.75470586	0.960849
45	0.13944300	8.64819240	1.20592989		45.00000000	0.76311111	6.59953171	0.982205
46	0.14927271	8.65767960	1.29235530		46.00000000	0.74652174	6.46314603	1.003600
47	0.15940684	8.64600090	1.37823168		47.00000000	0.73063830	6.31709938	1.025074
48	0.16959380	8.66276740	1.46915164		48.00000000	0.71541667	6.19748818	1.046449
49	0.17942351	8.64813900	1.55167945		49.00000000	0.70081633	6.06075701	1.067830
50	0.18953680	8.64762500	1.63904317		50.00000000	0.68680000	5.93918885	1.089177
51	0.19932409	8.64781190	1.72371724		51.00000000	0.67333333	5.82286001	1.110645
52	0.20949170	8.64687540	1.81144863		52.00000000	0.66038462	5.71026349	1.132035
53	0.21929462	8.64763640	1.89638014		53.00000000	0.64792453	5.60301574	1.153413
54	0.22943842	8.64229110	1.98287362		54.00000000	0.63592593	5.49585697	1.174895
55	0.23927483	8.64704040	2.06901912		55.00000000	0.62436364	5.39889759	1.196270
56	0.24942979	8.64635940	2.15665961		56.00000000	0.61321429	5.30207110	1.217612
57	0.25954160	8.65327740	2.24588546		57.00000000	0.60245614	5.21322010	1.238986
58	0.26937726	8.65128140	2.33045848		58.00000000	0.59206897	5.12215523	1.260467
59	0.27951363	8.65595720	2.41945802		59.00000000	0.58203390	5.03806051	1.281843
60	0.28932473	8.64085770	2.50001382		60.00000000	0.57233333	4.94545089	1.303205
61	0.29951763	8.64505960	2.58934776		61.00000000	0.56295082	4.86674339	1.324580
62	0.30930492	8.64500140	2.67394147		62.00000000	0.55387097	4.78821529	1.346054
63	0.31944427	8.64476780	2.76152154		63.00000000	0.54507937	4.71208454	1.367435
64	0.32928887	8.65650650	2.85049124		64.00000000	0.53656250	4.64475677	1.388806
65	0.33942297	8.63824940	2.93202027		65.00000000	0.52830769	4.56365361	1.410179
66	0.34923482	8.65514280	3.02267724		66.00000000	0.52030303	4.50329703	1.431662
67	0.35939202	8.63200470	3.10227361		67.00000000	0.51253731	4.42422450	1.453042
68	0.36955965	8.65023330	3.19677719		68.00000000	0.50500000	4.36836782	1.474403
69	0.37938341	8.64410690	3.27943075		69.00000000	0.49768116	4.30200914	1.495778
70	0.38952497	8.63483810	3.36348505		70.00000000	0.49057143	4.23600486	1.517270
71	0.39935544	8.64741420	3.45339190		71.00000000	0.48366197	4.18242540	1.538658
72	0.40951189	8.63954260	3.53799542		72.00000000	0.47694444	4.12058185	1.560009
73	0.41931182	8.63615510	3.62124191		73.00000000	0.47041096	4.06254200	1.581385
74	0.42945263	8.64249800	3.71154350		74.00000000	0.46405405	4.01058623	1.602852
75	0.43929130	8.63060950	3.79135167		75.00000000	0.45786667	3.95166840	1.624224
76	0.44942912	8.60986230	3.86952284		76.00000000	0.45184211	3.89029831	1.645586
77	0.45956475	8.61336520	3.95839902		77.00000000	0.44597403	3.84133716	1.666951
78	0.46945548	8.60403350	4.03921068		78.00000000	0.44025641	3.78798090	1.688426
79	0.47957176	8.58468630	4.11697312		79.00000000	0.43468354	3.73162187	1.709804
80	0.48939326	8.56483940	4.19157468		80.00000000	0.42925000	3.67645731	1.731192
81	0.49951994	8.52789500	4.25985360		81.00000000	0.42395062	3.61540635	1.752539
82	0.50932735	8.48813820	4.32324094		82.00000000	0.41878049	3.55466666	1.774013
83	0.51949573	8.41039280	4.36916315		83.00000000	0.41373494	3.47967336	1.795389
84	0.52925396	8.31828690	4.40248628		84.00000000	0.40880952	3.40059491	1.816772
85	0.53936279	8.18926430	4.41698444		85.00000000	0.40400000	3.30846278	1.838253
86	0.54951698	7.97470000	4.38223306		86.00000000	0.39930233	3.18431626	1.859619
87	0.55932587	7.72029830	4.31816256		87.00000000	0.39471264	3.04729935	1.880977
88	0.56947488	7.32183890	4.16960333		88.00000000	0.39022727	2.85718123	1.902362
89	0.57924950	6.83120200	3.95697034		89.00000000	0.38584270	2.63576940	1.923843
90	0.58935088	6.13354590	3.61481067		90.00000000	0.38155556	2.34028851	1.945212
91	0.59917241	5.26007410	3.15169128		91.00000000	0.37736264	1.98495544	1.966562
92	0.60925442	4.11786700	2.50882867		92.00000000	0.37326087	1.53703862	1.988038
93	0.61904472	2.73368360	1.69227240		93.00000000	0.36924731	1.00940532	2.009543
94	0.62913865	1.02545380	0.64515262		94.00000000	0.36531915	0.37461791	2.030977
95	0.63922662	-1.00917090	-0.64508890		95.00000000	0.36147368	-0.36478872	2.052337
96	0.64896029	-3.26052120	-2.11594878		96.00000000	0.35770833	-1.16631560	2.073722
97	0.65906316	-5.96398500	-3.93064280		97.00000000	0.35402062	-2.11137366	2.095212
98	0.66901869	-8.91806790	-5.96635410		98.00000000	0.35040816	-3.12496379	2.116595
99	0.67241186	-10.00041200	-6.72439563		99.00000000	0.34686869	-3.46882978	2.137956
100	0.67236722	-10.00035400	-6.72391022		100.00000000	0.34340000	-3.43412156	2.159327
101	0.67234856	-10.00030900	-6.72369336		101.00000000	0.34000000	-3.40010506	2.180804
19:57 02/04/2018
Test Lot:	JK-PERC
Recipe:	Recipe_YJX-LID
Cell Name:	1-0-5h
Test Order:	3
Test Condition:	Light
1	-0.29980370	8.65655230	-2.59526641		1.00000000	34.34000000	297.26600598	0.000000
2	-0.29001820	8.66279030	-2.51236685		2.00000000	17.17000000	148.74010945	0.061815
3	-0.27987096	8.66030220	-2.42376709		3.00000000	11.44666667	99.13159252	0.083348
4	-0.27004227	8.65894510	-2.33828119		4.00000000	8.58500000	74.33704368	0.104770
5	-0.25987718	8.65704630	-2.24976878		5.00000000	6.86800000	59.45659399	0.126126
6	-0.24971130	8.64643100	-2.15911153		6.00000000	5.72333333	49.48640676	0.147499
7	-0.23989603	8.65986350	-2.07746687		7.00000000	4.90571429	42.48281608	0.168992
8	-0.22978823	8.64748100	-1.98708935		8.00000000	4.29250000	37.11931219	0.190372
9	-0.21990894	8.66380690	-1.90524859		9.00000000	3.81555556	33.05723655	0.211718
10	-0.20980783	8.65844820	-1.81661023		10.00000000	3.43400000	29.73311112	0.233106
11	-0.19998808	8.65520100	-1.73093703		11.00000000	3.12181818	27.01996385	0.254579
12	-0.18985796	8.65133380	-1.64252459		12.00000000	2.86166667	24.75723356	0.275949
13	-0.18007095	8.65090370	-1.55777645		13.00000000	2.64153846	22.85169485	0.297311
14	-0.16992147	8.65664390	-1.47094966		14.00000000	2.45285714	21.23351082	0.318689
15	-0.16008908	8.65543940	-1.38564133		15.00000000	2.28933333	19.81518593	0.340164
16	-0.14997606	8.64808460	-1.29700565		16.00000000	2.14625000	18.56095157	0.361548
17	-0.13983254	8.65861800	-1.21075655		17.00000000	2.02000000	17.49040836	0.382894
18	-0.13000683	8.65188980	-1.12480477		18.00000000	1.90777778	16.50588310	0.404268
19	-0.11984172	8.63991260	-1.03542199		19.00000000	1.80736842	15.61550519	0.425739
20	-0.11000039	8.65720840	-0.95229630		20.00000000	1.71700000	14.86442682	0.447114
21	-0.09986281	8.66220280	-0.86503195		21.00000000	1.63523810	14.16476401	0.468473
22	-0.09002893	8.64668940	-0.77845217		22.00000000	1.56090909	13.49669609	0.489843
23	-0.07987870	8.65674590	-0.69148957		23.00000000	1.49304348	12.92489801	0.511319
24	-0.07006565	8.65262220	-0.60625157		24.00000000	1.43083333	12.38046026	0.532701
25	-0.05990351	8.64328000	-0.51776284		25.00000000	1.37360000	11.87240941	0.554051
26	-0.04975329	8.65752700	-0.43074045		26.00000000	1.32076923	11.43459528	0.575431
27	-0.03993949	8.66711900	-0.34616034		27.00000000	1.27185185	11.02329135	0.596921
28	-0.02978555	8.64473530	-0.25748817		28.00000000	1.22642857	10.60215036	0.618292
29	-0.01991221	8.65061280	-0.17225279		29.00000000	1.18413793	10.24351874	0.639646
30	-0.00980590	8.64653110	-0.08478699		30.00000000	1.14466667	9.89739593	0.661028
31	-0.00062105	8.65648080	-0.00537609		31.00000000	1.10774194	9.58914680	0.682617
32	0.00950441	8.64807800	0.08219485		32.00000000	1.07312500	9.28046870	0.704011
33	0.01932239	8.64606860	0.16706269		33.00000000	1.04060606	8.99715139	0.725389
34	0.02946935	8.66271880	0.25528467		34.00000000	1.01000000	8.74934599	0.746729
35	0.03928212	8.63983250	0.33939091		35.00000000	0.98114286	8.47690994	0.768205
36	0.04943875	8.65207480	0.42774778		36.00000000	0.95388889	8.25311802	0.789586
37	0.05923589	8.65510750	0.51269302		37.00000000	0.92810811	8.03287545	0.810967
38	0.06940220	8.64865880	0.60023597		38.00000000	0.90368421	7.81565640	0.832451
39	0.07951939	8.65378860	0.68814400		39.00000000	0.88051282	7.61977181	0.853829
40	0.08937310	8.63909150	0.77210236		40.00000000	0.85850000	7.41666005	0.875178
41	0.09952378	8.64764400	0.86064618		41.00000000	0.83756098	7.24292915	0.896560
42	0.10934474	8.64897250	0.94571965		42.00000000	0.81761905	7.07156466	0.918036
43	0.11951476	8.64829160	1.03359849		43.00000000	0.79860465	6.90656590	0.939411
44	0.12929256	8.64341070	1.11752870		44.00000000	0.78045455	6.74578917	0.960770
45	0.13943729	8.65230850	1.20645445		45.00000000	0.76311111	6.60267275	0.982138
46	0.14924186	8.64215760	1.28977167		46.00000000	0.74652174	6.45155852	1.003627
47	0.15940148	8.65610310	1.37979565		47.00000000	0.73063830	6.32448044	1.024994
48	0.16953355	8.65086360	1.46661162		48.00000000	0.71541667	6.18897200	1.046356
49	0.17933144	8.65055940	1.55131727		49.00000000	0.70081633	6.06245326	1.067738
50	0.18951041	8.64918140	1.63910991		50.00000000	0.68680000	5.94025779	1.089208
51	0.19930457	8.64784150	1.72355433		51.00000000	0.67333333	5.82287994	1.110575
52	0.20943886	8.63576890	1.80866559		52.00000000	0.66038462	5.70292892	1.131922
53	0.21926132	8.67023850	1.90104794		53.00000000	0.64792453	5.61766019	1.153302
54	0.22943953	8.63786030	1.98186661		54.00000000	0.63592593	5.49303931	1.174783
55	0.23921435	8.64988710	2.06917712		55.00000000	0.62436364	5.40067496	1.196162
56	0.24938288	8.66115470	2.15994370		56.00000000	0.61321429	5.31114379	1.217512
57	0.25951645	8.64108560	2.24250386		57.00000000	0.60245614	5.20587508	1.238877
58	0.26934856	8.63499640	2.32582385		58.00000000	0.59206897	5.11251339	1.260357
59	0.27949628	8.65834330	2.41997474		59.00000000	0.58203390	5.03944930	1.281731
60	0.28934032	8.65973280	2.50560986		60.00000000	0.57233333	4.95625374	1.303105
61	0.29948577	8.62291910	2.58244157		61.00000000	0.56295082	4.85427938	1.324475
62	0.30931789	8.65941620	2.67851235		62.00000000	0.55387097	4.79619923	1.345952
63	0.31946039	8.65193650	2.76395101		63.00000000	0.54507937	4.71599205	1.367344
64	0.32928434	8.65152930	2.84881312		64.00000000	0.53656250	4.64208619	1.388732
65	0.33941862	8.64595510	2.93459815		65.00000000	0.52830769	4.56772459	1.410120
66	0.34923214	8.64005760	3.01738581		66.00000000	0.52030303	4.49544815	1.431609
67	0.35939547	8.63253310	3.10249329		67.00000000	0.51253731	4.42449532	1.452990
68	0.36954468	8.65039250	3.19670653		68.00000000	0.50500000	4.36844821	1.474375
69	0.37934405	8.62952800	3.27356010		69.00000000	0.49768116	4.29475350	1.495862
70	0.38950068	8.65324120	3.37044333		70.00000000	0.49057143	4.24503290	1.517233
71	0.39933801	8.64602850	3.45268782		71.00000000	0.48366197	4.18175519	1.538593
72	0.40948647	8.63420010	3.53558812		72.00000000	0.47694444	4.11803377	1.559981
73	0.41929924	8.64423850	3.62452263		73.00000000	0.47041096	4.06634452	1.581464
74	0.42942163	8.62992000	3.70587431		74.00000000	0.46405405	4.00474936	1.602856
75	0.43927234	8.62300970	3.78784965		75.00000000	0.45786667	3.94818871	1.624197
76	0.44941112	8.62556460	3.87642465		76.00000000	0.45184211	3.89739327	1.645577
77	0.45953947	8.60736470	3.95542381		77.00000000	0.44597403	3.83866109	1.667060
78	0.46939915	8.60076430	4.03719145		78.00000000	0.44025641	3.78654162	1.688435
79	0.47953269	8.58803270	4.11824242		79.00000000	0.43468354	3.73307649	1.709778
80	0.48935068	8.55601020	4.18688941		80.00000000	0.42925000	3.67266738	1.731158
81	0.49950582	8.51716040	4.25437119		81.00000000	0.42395062	3.61085541	1.752645
82	0.50932086	8.48769280	4.32295900		82.00000000	0.41878049	3.55448013	1.774021
83	0.51945662	8.41502090	4.37123831		83.00000000	0.41373494	3.48158817	1.795385
84	0.52921212	8.32581900	4.40612432		84.00000000	0.40880952	3.40367410	1.816762
85	0.53934342	8.18397050	4.41397064		85.00000000	0.40400000	3.30632408	1.838240
86	0.54950899	7.98864600	4.38983279		86.00000000	0.39930233	3.18988493	1.859629
87	0.55929494	7.73937420	4.32859283		87.00000000	0.39471264	3.05482885	1.880978
88	0.56943297	7.32673550	4.17208476		88.00000000	0.39022727	2.85909201	1.902347
89	0.57922196	6.86689420	3.97745592		89.00000000	0.38584270	2.64954098	1.923825
90	0.58933538	6.16232400	3.63167556		90.00000000	0.38155556	2.35126896	1.945201
91	0.59913778	5.30140540	3.17627226		91.00000000	0.37736264	2.00055232	1.966576
92	0.60926163	4.14247270	2.52384967		92.00000000	0.37326087	1.54622296	1.988049
93	0.61900967	2.76755020	1.71314034		93.00000000	0.36924731	1.02191047	2.009565
94	0.62915659	1.03436580	0.65077806		94.00000000	0.36531915	0.37787363	2.030957
95	0.63919789	-1.02108880	-0.65267781		95.00000000	0.36147368	-0.36909673	2.052357
96	0.64895481	-3.31446740	-2.15093956		96.00000000	0.35770833	-1.18561261	2.073749
97	0.65903330	-6.05432890	-3.99000435		97.00000000	0.35402062	-2.14335726	2.095235
98	0.66900092	-9.07795910	-6.07316299		98.00000000	0.35040816	-3.18099097	2.116615
99	0.67178679	-10.00036600	-6.71811377		99.00000000	0.34686869	-3.46881382	2.137986
100	0.67179942	-10.00026600	-6.71817290		100.00000000	0.34340000	-3.43409134	2.159499
101	0.67176521	-10.00023600	-6.71781064		101.00000000	0.34000000	-3.40008024	2.180874
19:58 02/04/2018
Test Lot:	JK-PERC
Recipe:	Recipe_YJX-LID
Cell Name:	1-0-5h
Test Order:	4
Test Condition:	Light
1	-0.29982591	8.64402480	-2.59170260		1.00000000	34.34000000	296.83581163	0.000000
2	-0.28999290	8.66193200	-2.51189878		2.00000000	17.17000000	148.72537244	0.061797
3	-0.27986145	8.64135840	-2.41838309		3.00000000	11.44666667	98.91474915	0.083209
4	-0.27001134	8.66037270	-2.33839884		4.00000000	8.58500000	74.34929963	0.104688
5	-0.25985530	8.65112300	-2.24804016		5.00000000	6.86800000	59.41591276	0.126078
6	-0.24966727	8.64946560	-2.15948846		6.00000000	5.72333333	49.50377478	0.147423
7	-0.23987521	8.65519810	-2.07616746		7.00000000	4.90571429	42.45992896	0.168815
8	-0.22972812	8.64659690	-1.98636645		8.00000000	4.29250000	37.11551719	0.190291
9	-0.21990852	8.64205070	-1.90046058		9.00000000	3.81555556	32.97422456	0.211658
10	-0.20976664	8.66126440	-1.81684433		10.00000000	3.43400000	29.74278195	0.233049
11	-0.19993885	8.63309760	-1.72609161		11.00000000	3.12181818	26.95096105	0.254406
12	-0.18980366	8.65322400	-1.64241359		12.00000000	2.86166667	24.76264268	0.275880
13	-0.17998853	8.65316200	-1.55746991		13.00000000	2.64153846	22.85766024	0.297260
14	-0.16985185	8.65390780	-1.46988225		14.00000000	2.45285714	21.22679956	0.318638
15	-0.16005310	8.64507960	-1.38367179		15.00000000	2.28933333	19.79146890	0.340097
16	-0.14987847	8.65936470	-1.29785233		16.00000000	2.14625000	18.58516149	0.361562
17	-0.13972616	8.64672180	-1.20817323		17.00000000	2.02000000	17.46637804	0.382944
18	-0.12993410	8.65072920	-1.12402471		18.00000000	1.90777778	16.50366893	0.404350
19	-0.11978254	8.65118310	-1.03626069		19.00000000	1.80736842	15.63587514	0.425697
20	-0.10995922	8.64610480	-0.95071894		20.00000000	1.71700000	14.84536194	0.447180
21	-0.09982553	8.64707760	-0.86319911		21.00000000	1.63523810	14.14003070	0.468572
22	-0.08999253	8.65406320	-0.77880105		22.00000000	1.56090909	13.50820592	0.489930
23	-0.07987744	8.64648530	-0.69065915		23.00000000	1.49304348	12.90957849	0.511300
24	-0.07001468	8.65981200	-0.60631395		24.00000000	1.43083333	12.39074767	0.532785
25	-0.05988470	8.63629720	-0.51718208		25.00000000	1.37360000	11.86281783	0.554158
26	-0.04971900	8.67266750	-0.43119637		26.00000000	1.32076923	11.45459238	0.575537
27	-0.03988526	8.64152050	-0.34466929		27.00000000	1.27185185	10.99073385	0.596898
28	-0.02974784	8.65823170	-0.25756373		28.00000000	1.22642857	10.61870273	0.618367
29	-0.01996695	8.64700890	-0.17265437		29.00000000	1.18413793	10.23925123	0.639755
30	-0.00978041	8.65911480	-0.08468966		30.00000000	1.14466667	9.91180007	0.661149
31	-0.00062621	8.64365010	-0.00541278		31.00000000	1.10774194	9.57493369	0.682739
32	0.00951993	8.64830400	0.08233121		32.00000000	1.07312500	9.28071123	0.704129
33	0.01932734	8.66214370	0.16741617		33.00000000	1.04060606	9.01387923	0.725476
34	0.02945032	8.63554100	0.25431947		34.00000000	1.01000000	8.72189641	0.746853
35	0.03931207	8.65582850	0.34027852		35.00000000	0.98114286	8.49260431	0.768341
36	0.04944101	8.64663890	0.42749853		36.00000000	0.95388889	8.24793277	0.789727
37	0.05929010	8.65734770	0.51329501		37.00000000	0.92810811	8.03495460	0.811072
38	0.06943169	8.64827730	0.60046453		38.00000000	0.90368421	7.81531164	0.832449
39	0.07956956	8.65674300	0.68881326		39.00000000	0.88051282	7.62237320	0.853935
40	0.08940526	8.65126990	0.77346904		40.00000000	0.85850000	7.42711521	0.875314
41	0.09954983	8.64725110	0.86083238		41.00000000	0.83756098	7.24260007	0.896674
42	0.10937436	8.64454560	0.94549164		42.00000000	0.81761905	7.06794514	0.918046
43	0.11952191	8.64355660	1.03309439		43.00000000	0.79860465	6.90278450	0.939515
44	0.12931444	8.65157510	1.11877359		44.00000000	0.78045455	6.75216111	0.960922
45	0.13946049	8.64373020	1.20545885		45.00000000	0.76311111	6.59612656	0.982272
46	0.14927907	8.64845940	1.29103398		46.00000000	0.74652174	6.45626295	1.003649
47	0.15943480	8.64142990	1.37774465		47.00000000	0.73063830	6.31375963	1.025141
48	0.16961212	8.64895150	1.46696700		48.00000000	0.71541667	6.18760405	1.046524
49	0.17942251	8.65078540	1.55214563		49.00000000	0.70081633	6.06261165	1.067892
50	0.18954252	8.64969060	1.63948415		50.00000000	0.68680000	5.94060750	1.089269
51	0.19934249	8.64735600	1.72378548		51.00000000	0.67333333	5.82255304	1.110744
52	0.20947663	8.65079590	1.81213957		52.00000000	0.66038462	5.71285252	1.132131
53	0.21929298	8.64541720	1.89587930		53.00000000	0.64792453	5.60157786	1.153485
54	0.22941820	8.63826080	1.98177424		54.00000000	0.63592593	5.49329400	1.174849
55	0.23927176	8.65747930	2.07149031		55.00000000	0.62436364	5.40541526	1.196318
56	0.24936795	8.64391710	2.15551589		56.00000000	0.61321429	5.30057345	1.217685
57	0.25954825	8.65644260	2.24676453		57.00000000	0.60245614	5.21512700	1.239068
58	0.26937947	8.65536790	2.33157842		58.00000000	0.59206897	5.12457472	1.260421
59	0.27953520	8.64039230	2.41529379		59.00000000	0.58203390	5.02900121	1.281908
60	0.28935081	8.64724450	2.50208720		60.00000000	0.57233333	4.94910627	1.303292
61	0.29949760	8.62958810	2.58454092		61.00000000	0.56295082	4.85803369	1.324677
62	0.30930948	8.65775970	2.67792715		62.00000000	0.55387097	4.79528174	1.346165
63	0.31946000	8.63802720	2.75950417		63.00000000	0.54507937	4.70841038	1.367553
64	0.32929051	8.64622970	2.84712139		64.00000000	0.53656250	4.63924262	1.388916
65	0.33942911	8.64713950	2.93509086		65.00000000	0.52830769	4.56835031	1.410290
66	0.34925440	8.64818190	3.02041558		66.00000000	0.52030303	4.49967525	1.431777
67	0.35938036	8.63496490	3.10323679		67.00000000	0.51253731	4.42574171	1.453159
68	0.36957553	8.64537330	3.19511842		68.00000000	0.50500000	4.36591352	1.474501
69	0.37937474	8.63798430	3.27703305		69.00000000	0.49768116	4.29896204	1.495883
70	0.38952973	8.62992860	3.36161376		70.00000000	0.49057143	4.23359640	1.517355
71	0.39932972	8.64515970	3.45226920		71.00000000	0.48366197	4.18133499	1.538730
72	0.40950555	8.63357160	3.53549549		72.00000000	0.47694444	4.11773401	1.560092
73	0.41933155	8.63897230	3.62259364		73.00000000	0.47041096	4.06386724	1.581465
74	0.42947465	8.62501240	3.70422418		74.00000000	0.46405405	4.00247197	1.602944
75	0.43929768	8.63047600	3.79134808		75.00000000	0.45786667	3.95160728	1.624332
76	0.44945043	8.61331750	3.87125925		76.00000000	0.45184211	3.89185951	1.645677
77	0.45956525	8.60940360	3.95658272		77.00000000	0.44597403	3.83957038	1.667062
78	0.46945527	8.59747700	4.03613089		78.00000000	0.44025641	3.78509436	1.688545
79	0.47957900	8.57975580	4.11467071		79.00000000	0.43468354	3.72947866	1.709919
80	0.48939833	8.56119820	4.18983610		80.00000000	0.42925000	3.67489433	1.731280
81	0.49952355	8.53097720	4.26142402		81.00000000	0.42395062	3.61671305	1.752654
82	0.50935477	8.48907180	4.32394921		82.00000000	0.41878049	3.55505763	1.774137
83	0.51948518	8.40454390	4.36603600		83.00000000	0.41373494	3.47725346	1.795523
84	0.52925766	8.32267190	4.40483785		84.00000000	0.40880952	3.40238754	1.816889
85	0.53937018	8.18185620	4.41304925		85.00000000	0.40400000	3.30546990	1.838248
86	0.54951775	7.98970510	4.39048477		86.00000000	0.39930233	3.19030783	1.859727
87	0.55931252	7.72138260	4.31866596		87.00000000	0.39471264	3.04772734	1.881106
88	0.56943101	7.34979820	4.18520301		88.00000000	0.39022727	2.86809171	1.902490
89	0.57925558	6.86464500	3.97638392		89.00000000	0.38584270	2.64867314	1.923831
90	0.58936214	6.16106180	3.63109657		90.00000000	0.38155556	2.35078736	1.945300
91	0.59916735	5.30529400	3.17875895		91.00000000	0.37736264	2.00201974	1.966671
92	0.60928959	4.14606710	2.52615552		92.00000000	0.37326087	1.54756461	1.988155
93	0.61905682	2.77395940	1.71723848		93.00000000	0.36924731	1.02427705	2.009664
94	0.62918204	1.03247030	0.64961177		94.00000000	0.36531915	0.37718117	2.031116
95	0.63922018	-1.02565820	-0.65562142		95.00000000	0.36147368	-0.37074845	2.052483
96	0.64899260	-3.34102800	-2.16830245		96.00000000	0.35770833	-1.19511356	2.073868
97	0.65904415	-6.08503530	-4.01030692		97.00000000	0.35402062	-2.15422796	2.095358
98	0.66902047	-9.13291170	-6.11010488		98.00000000	0.35040816	-3.20024681	2.116742
99	0.67165452	-10.00030100	-6.71674737		99.00000000	0.34686869	-3.46879128	2.138095
100	0.67164928	-10.00026100	-6.71666810		100.00000000	0.34340000	-3.43408963	2.159482
101	0.67162174	-10.00017300	-6.71633359		101.00000000	0.34000000	-3.40005882	2.180974
20:20 02/04/2018
Test Lot:	JK-PERC
Recipe:	Recipe_YJX-LID
Cell Name:	1-0-5h
Test Order:	5
Test Condition:	Light
1	-0.29980367	8.94597050	-2.68203479		1.00000000	34.34000000	307.20462697	0.000000
2	-0.28998026	8.96199610	-2.59880196		2.00000000	17.17000000	153.87747304	0.061809
3	-0.27989784	8.92392540	-2.49778744		3.00000000	11.44666667	102.14919941	0.083232
4	-0.27004096	8.94150450	-2.41457246		4.00000000	8.58500000	76.76281613	0.104748
5	-0.25992131	8.93152140	-2.32149274		5.00000000	6.86800000	61.34168898	0.126128
6	-0.24976151	8.93555160	-2.23175686		6.00000000	5.72333333	51.14114032	0.147526
7	-0.23992991	8.93210600	-2.14307939		7.00000000	4.90571429	43.81836001	0.168915
8	-0.22978349	8.93552490	-2.05323610		8.00000000	4.29250000	38.35574063	0.190393
9	-0.21994148	8.93079090	-1.96425137		9.00000000	3.81555556	34.07592883	0.211783
10	-0.20981665	8.92718980	-1.87307306		10.00000000	3.43400000	30.65596977	0.233141
11	-0.20000963	8.93431190	-1.78694842		11.00000000	3.12181818	27.89129733	0.254515
12	-0.18984683	8.93010810	-1.69535271		12.00000000	2.86166667	25.55499268	0.275989
13	-0.18011795	8.93595600	-1.60952608		13.00000000	2.64153846	23.60467146	0.297356
14	-0.16993208	8.92036720	-1.51585655		14.00000000	2.45285714	21.88038640	0.318706
15	-0.16010422	8.94434830	-1.43202791		15.00000000	2.28933333	20.47659471	0.340075
16	-0.14998533	8.93651290	-1.34034584		16.00000000	2.14625000	19.17999081	0.361549
17	-0.13983071	8.93226620	-1.24900512		17.00000000	2.02000000	18.04317772	0.382943
18	-0.12998722	8.93724440	-1.16172755		18.00000000	1.90777778	17.05027626	0.404325
19	-0.11984675	8.92923550	-1.07013985		19.00000000	1.80736842	16.13841827	0.425664
20	-0.11004866	8.93927480	-0.98375521		20.00000000	1.71700000	15.34873483	0.447122
21	-0.09986874	8.93124680	-0.89195234		21.00000000	1.63523810	14.60471501	0.468497
22	-0.09005874	8.93639660	-0.80480065		22.00000000	1.56090909	13.94890269	0.489886
23	-0.07990934	8.93391800	-0.71390349		23.00000000	1.49304348	13.33872801	0.511373
24	-0.07009041	8.92740150	-0.62572520		24.00000000	1.43083333	12.77362365	0.532735
25	-0.05994026	8.93957710	-0.53584054		25.00000000	1.37360000	12.27940310	0.554076
26	-0.04981170	8.93871120	-0.44525236		26.00000000	1.32076923	11.80597472	0.575454
27	-0.03995406	8.93756960	-0.35709218		27.00000000	1.27185185	11.36726445	0.596937
28	-0.02981656	8.92885970	-0.26622792		28.00000000	1.22642857	10.95060865	0.618307
29	-0.01998275	8.93803220	-0.17860645		29.00000000	1.18413793	10.58386296	0.639654
30	-0.00984079	8.93373970	-0.08791503		30.00000000	1.14466667	10.22615404	0.661031
31	-0.00062996	8.92590620	-0.00562294		31.00000000	1.10774194	9.88760061	0.682618
32	0.00950212	8.92962070	0.08485031		32.00000000	1.07312500	9.58259921	0.704010
33	0.01932598	8.94424630	0.17285632		33.00000000	1.04060606	9.30743691	0.725375
34	0.02946170	8.91698170	0.26270941		34.00000000	1.01000000	9.00615152	0.746771
35	0.03929300	8.93809030	0.35120440		35.00000000	0.98114286	8.76954345	0.768251
36	0.04942649	8.93036370	0.44139649		36.00000000	0.95388889	8.51857471	0.789632
37	0.05926077	8.94592380	0.53014231		37.00000000	0.92810811	8.30278441	0.810986
38	0.06939276	8.92514320	0.61934035		38.00000000	0.90368421	8.06551099	0.832361
39	0.07954337	8.92278190	0.70974812		39.00000000	0.88051282	7.85662386	0.853839
40	0.08935458	8.93378160	0.79827426		40.00000000	0.85850000	7.66965150	0.875207
41	0.09954090	8.93305400	0.88920427		41.00000000	0.83756098	7.48197742	0.896583
42	0.10932234	8.92226980	0.97540341		42.00000000	0.81761905	7.29501774	0.917970
43	0.11945433	8.92563060	1.06620522		43.00000000	0.79860465	7.12805011	0.939452
44	0.12931690	8.94336510	1.15652825		44.00000000	0.78045455	6.97988994	0.960839
45	0.13946304	8.93608760	1.24625394		45.00000000	0.76311111	6.81922774	0.982208
46	0.14925787	8.93816570	1.33409157		46.00000000	0.74652174	6.67253500	1.003584
47	0.15942188	8.92855930	1.42340771		47.00000000	0.73063830	6.52354737	1.025071
48	0.16955461	8.94261460	1.51626153		48.00000000	0.71541667	6.39769553	1.046462
49	0.17936879	8.91845990	1.59969336		49.00000000	0.70081633	6.25020231	1.067838
50	0.18953206	8.93688010	1.69382530		50.00000000	0.68680000	6.13784925	1.089182
51	0.19931051	8.92324640	1.77849679		51.00000000	0.67333333	6.00831924	1.110661
52	0.20941943	8.93345740	1.87083956		52.00000000	0.66038462	5.89951783	1.132026
53	0.21924850	8.93137360	1.95819026		53.00000000	0.64792453	5.78685603	1.153406
54	0.22943483	8.93299010	2.04953906		54.00000000	0.63592593	5.68072000	1.174898
55	0.23923786	8.93506620	2.13760612		55.00000000	0.62436364	5.57873042	1.196273
56	0.24939069	8.92837620	2.22665390		56.00000000	0.61321429	5.47500783	1.217614
57	0.25953162	8.94080730	2.32042220		57.00000000	0.60245614	5.38644426	1.239001
58	0.26936069	8.92834280	2.40494458		58.00000000	0.59206897	5.28619469	1.260488
59	0.27950758	8.91589360	2.49205984		59.00000000	0.58203390	5.18935231	1.281876
60	0.28934556	8.93089100	2.58411366		60.00000000	0.57233333	5.11144662	1.303236
61	0.29946789	8.92757030	2.67352064		61.00000000	0.56295082	5.02578302	1.324606
62	0.30930886	8.92647170	2.76103679		62.00000000	0.55387097	4.94411352	1.346082
63	0.31944534	8.93688680	2.85484684		63.00000000	0.54507937	4.87131258	1.367460
64	0.32929152	8.93900300	2.94353789		64.00000000	0.53656250	4.79633380	1.388804
65	0.33941978	8.92455480	3.02917043		65.00000000	0.52830769	4.71491095	1.410191
66	0.34925407	8.93249610	3.11971062		66.00000000	0.52030303	4.64760479	1.431676
67	0.35937119	8.92212300	3.20635396		67.00000000	0.51253731	4.57292095	1.453052
68	0.36954784	8.92757320	3.29916539		68.00000000	0.50500000	4.50842447	1.474425
69	0.37934938	8.92487140	3.38564443		69.00000000	0.49768116	4.44174035	1.495808
70	0.38951188	8.92098520	3.47482972		70.00000000	0.49057143	4.37638045	1.517281
71	0.39934021	8.92066760	3.56238127		71.00000000	0.48366197	4.31458768	1.538663
72	0.40948114	8.91521930	3.65061416		72.00000000	0.47694444	4.25206432	1.560006
73	0.41932136	8.91304110	3.73742852		73.00000000	0.47041096	4.19279221	1.581373
74	0.42946675	8.89868260	3.82168830		74.00000000	0.46405405	4.12946974	1.602848
75	0.43927872	8.90822510	3.91319372		75.00000000	0.45786667	4.07877933	1.624214
76	0.44941518	8.89488600	3.99749679		76.00000000	0.45184211	4.01908402	1.645588
77	0.45957917	8.88165760	4.08182483		77.00000000	0.44597403	3.96098860	1.666944
78	0.46940601	8.86402990	4.16082891		78.00000000	0.44025641	3.90244598	1.688412
79	0.47954175	8.84025100	4.23926943		79.00000000	0.43468354	3.84271164	1.709800
80	0.48934698	8.79777810	4.30516614		80.00000000	0.42925000	3.77644625	1.731182
81	0.49949163	8.76435470	4.37772182		81.00000000	0.42395062	3.71565359	1.752524
82	0.50931549	8.69115920	4.42654201		82.00000000	0.41878049	3.63968789	1.773989
83	0.51945347	8.61365600	4.47439350		83.00000000	0.41373494	3.56377045	1.795354
84	0.52922893	8.51064490	4.50407949		84.00000000	0.40880952	3.47923269	1.816734
85	0.53937358	8.35695550	4.50752101		85.00000000	0.40400000	3.37621002	1.838202
86	0.54948473	8.17898850	4.49422929		86.00000000	0.39930233	3.26588913	1.859584
87	0.55931383	7.93241640	4.43671020		87.00000000	0.39471264	3.13102505	1.880925
88	0.56942052	7.64832260	4.35511183		88.00000000	0.39022727	2.98458407	1.902297
89	0.57924807	7.27888540	4.21628032		89.00000000	0.38584270	2.80850477	1.923777
90	0.58936369	6.83286810	4.02704436		90.00000000	0.38155556	2.60711878	1.945165
91	0.59912950	6.31170890	3.78153100		91.00000000	0.37736264	2.38180312	1.966507
92	0.60925853	5.67933990	3.46018628		92.00000000	0.37326087	2.11987535	1.987983
93	0.61907125	4.96055220	3.07093525		93.00000000	0.36924731	1.83167057	2.009517
94	0.62922555	4.12045340	2.59269456		94.00000000	0.36531915	1.50528053	2.030899
95	0.63935977	3.15394230	2.01650382		95.00000000	0.36147368	1.14006714	2.052250
96	0.64912856	2.11605930	1.37359453		96.00000000	0.35770833	0.75693205	2.073637
97	0.65916604	0.92081279	0.60696852		97.00000000	0.35402062	0.32598671	2.095121
98	0.66895789	-0.36385390	-0.24340294		98.00000000	0.35040816	-0.12749738	2.116504
99	0.67910850	-1.80521330	-1.22593570		99.00000000	0.34686869	-0.62617197	2.137866
100	0.68889886	-3.35963510	-2.31444879		100.00000000	0.34340000	-1.15369869	2.159245
101	0.69898021	-5.15078540	-3.60029706		101.00000000	0.34000000	-1.75126704	2.180727
20:21 02/04/2018
Test Lot:	JK-PERC
Recipe:	Recipe_YJX-LID
Cell Name:	1-0-5h
Test Order:	6
Test Condition:	Light
1	-0.29985735	8.90807440	-2.67115158		1.00000000	34.34000000	305.90327490	0.000000
2	-0.29005274	8.91351800	-2.58539032		2.00000000	17.17000000	153.04510406	0.061785
3	-0.27991170	8.92576030	-2.49842474		3.00000000	11.44666667	102.17020290	0.083203
4	-0.27007133	8.92143630	-2.40942417		4.00000000	8.58500000	76.59053064	0.104685
5	-0.25988862	8.92750640	-2.32015732		5.00000000	6.86800000	61.31411396	0.126056
6	-0.24972822	8.91205120	-2.22559068		6.00000000	5.72333333	51.00663970	0.147456
7	-0.23993327	8.92036530	-2.14029242		7.00000000	4.90571429	43.76076349	0.168802
8	-0.22979148	8.92295360	-2.05041871		8.00000000	4.29250000	38.30177833	0.190282
9	-0.21993625	8.92251780	-1.96238511		9.00000000	3.81555556	34.04436236	0.211663
10	-0.20983167	8.91326240	-1.87028473		10.00000000	3.43400000	30.60814308	0.233051
11	-0.19998835	8.91922860	-1.78374181		11.00000000	3.12181818	27.84421001	0.254472
12	-0.18982050	8.91760160	-1.69274359		12.00000000	2.86166667	25.51920325	0.275949
13	-0.18007319	8.91977310	-1.60621200		13.00000000	2.64153846	23.56192371	0.297322
14	-0.16990758	8.91510490	-1.51474390		14.00000000	2.45285714	21.86747873	0.318668
15	-0.16009329	8.91923050	-1.42790896		15.00000000	2.28933333	20.41909169	0.340027
16	-0.14996415	8.91766640	-1.33733026		16.00000000	2.14625000	19.13954151	0.361521
17	-0.13978218	8.91991810	-1.24684560		17.00000000	2.02000000	18.01823456	0.382904
18	-0.13000137	8.92148490	-1.15980526		18.00000000	1.90777778	17.02021064	0.404260
19	-0.11981715	8.92153170	-1.06895250		19.00000000	1.80736842	16.12449466	0.425617
20	-0.11000434	8.91667560	-0.98087301		20.00000000	1.71700000	15.30993201	0.447086
21	-0.09983055	8.91468140	-0.88995750		21.00000000	1.63523810	14.57762663	0.468460
22	-0.09005643	8.91633130	-0.80297300		22.00000000	1.56090909	13.91758258	0.489847
23	-0.07989902	8.91796680	-0.71253681		23.00000000	1.49304348	13.31491217	0.511200
24	-0.07010482	8.91916560	-0.62527645		24.00000000	1.43083333	12.76183945	0.532667
25	-0.05991763	8.92354970	-0.53467790		25.00000000	1.37360000	12.25738787	0.554034
26	-0.04980040	8.90567300	-0.44350604		26.00000000	1.32076923	11.76233888	0.575422
27	-0.03995186	8.92237760	-0.35646559		27.00000000	1.27185185	11.34794247	0.596903
28	-0.02982793	8.91592120	-0.26594351		28.00000000	1.22642857	10.93474050	0.618271
29	-0.01999428	8.93044470	-0.17855784		29.00000000	1.18413793	10.57487831	0.639633
30	-0.00986217	8.91358470	-0.08790728		30.00000000	1.14466667	10.20308329	0.661008
31	-0.00065522	8.92192550	-0.00584579		31.00000000	1.10774194	9.88319102	0.682605
32	0.00948339	8.90729140	0.08447131		32.00000000	1.07312500	9.55863708	0.703979
33	0.01927508	8.92434220	0.17201741		33.00000000	1.04060606	9.28672458	0.725339
34	0.02944189	8.92694570	0.26282612		34.00000000	1.01000000	9.01621516	0.746721
35	0.03928121	8.91157250	0.35005733		35.00000000	0.98114286	8.74352570	0.768200
36	0.04939890	8.92696190	0.44098205		36.00000000	0.95388889	8.51532977	0.789579
37	0.05921887	8.91956620	0.52820662		37.00000000	0.92810811	8.27832171	0.810934
38	0.06936186	8.92318060	0.61892839		38.00000000	0.90368421	8.06373742	0.832322
39	0.07952717	8.91763970	0.70919464		39.00000000	0.88051282	7.85209608	0.853809
40	0.08939478	8.91989990	0.79739247		40.00000000	0.85850000	7.65773406	0.875204
41	0.09949534	8.91920190	0.88741906		41.00000000	0.83756098	7.47037545	0.896551
42	0.10930043	8.92402360	0.97539962		42.00000000	0.81761905	7.29645168	0.917917
43	0.11948436	8.92266850	1.06611934		43.00000000	0.79860465	7.12568456	0.939393
44	0.12929688	8.91640190	1.15286295		44.00000000	0.78045455	6.95884639	0.960756
45	0.13945328	8.92484950	1.24459954		45.00000000	0.76311111	6.81065182	0.982109
46	0.14923900	8.91479110	1.33043451		46.00000000	0.74652174	6.65508536	1.003484
47	0.15943186	8.92541690	1.42299582		47.00000000	0.73063830	6.52125141	1.024956
48	0.16958900	8.90648750	1.51044231		48.00000000	0.71541667	6.37184960	1.046342
49	0.17940450	8.92548180	1.60127160		49.00000000	0.70081633	6.25512337	1.067702
50	0.18953857	8.90840150	1.68848568		50.00000000	0.68680000	6.11829015	1.089062
51	0.19929974	8.92901520	1.77955041		51.00000000	0.67333333	6.01220357	1.110535
52	0.20946357	8.91971110	1.86835453		52.00000000	0.66038462	5.89043998	1.131911
53	0.21933043	8.91002660	1.95423997		53.00000000	0.64792453	5.77302478	1.153289
54	0.22943322	8.91793540	2.04607063		54.00000000	0.63592593	5.67114633	1.174638
55	0.23927255	8.90776350	2.13138329		55.00000000	0.62436364	5.56168361	1.196100
56	0.24939023	8.92318060	2.22535406		56.00000000	0.61321429	5.47182182	1.217468
57	0.25953993	8.90232370	2.31050847		57.00000000	0.60245614	5.36325958	1.238856
58	0.26934576	8.93249610	2.40592995		58.00000000	0.59206897	5.28865373	1.260347
59	0.27950290	8.90245340	2.48826154		59.00000000	0.58203390	5.18152966	1.281735
60	0.28932062	8.91861150	2.58033821		60.00000000	0.57233333	5.10441865	1.303082
61	0.29948744	8.91501330	2.66993451		61.00000000	0.56295082	5.01871404	1.324463
62	0.30930442	8.91703410	2.75807806		62.00000000	0.55387097	4.93888631	1.345947
63	0.31945857	8.90775870	2.84565986		63.00000000	0.54507937	4.85543546	1.367324
64	0.32924953	8.91904350	2.93659088		64.00000000	0.53656250	4.78562428	1.388667
65	0.33938804	8.91525360	3.02573045		65.00000000	0.52830769	4.70999706	1.410049
66	0.34921250	8.90104010	3.10835447		66.00000000	0.52030303	4.63123814	1.431554
67	0.35935995	8.91758820	3.20462405		67.00000000	0.51253731	4.57059670	1.452943
68	0.36954165	8.90634060	3.29126380		68.00000000	0.50500000	4.49770200	1.474306
69	0.37936309	8.91156390	3.38071842		69.00000000	0.49768116	4.43511745	1.495691
70	0.38950756	8.90197470	3.46738644		70.00000000	0.49057143	4.36705445	1.517176
71	0.39932010	8.90390680	3.55550895		71.00000000	0.48366197	4.30648112	1.538576
72	0.40948915	8.90878010	3.64804879		72.00000000	0.47694444	4.24899318	1.559924
73	0.41933218	8.90256210	3.73313077		73.00000000	0.47041096	4.18786277	1.581313
74	0.42945284	8.89220050	3.81878076		74.00000000	0.46405405	4.12646169	1.602789
75	0.43928623	8.88447670	3.90282828		75.00000000	0.45786667	4.06790573	1.624163
76	0.44943294	8.88935470	3.99516882		76.00000000	0.45184211	4.01658474	1.645529
77	0.45956996	8.87307830	4.07780024		77.00000000	0.44597403	3.95716245	1.666910
78	0.46940482	8.84948640	4.15399157		78.00000000	0.44025641	3.89604312	1.688383
79	0.47954485	8.83377740	4.23619246		79.00000000	0.43468354	3.83989767	1.709774
80	0.48935810	8.80322930	4.30793156		80.00000000	0.42925000	3.77878618	1.731151
81	0.49949589	8.76238440	4.37677499		81.00000000	0.42395062	3.71481828	1.752517
82	0.50932032	8.69813250	4.43013563		82.00000000	0.41878049	3.64260817	1.773981
83	0.51944697	8.62067030	4.47798107		83.00000000	0.41373494	3.56667251	1.795358
84	0.52920067	8.52337840	4.51057756		84.00000000	0.40880952	3.48443826	1.816734
85	0.53936899	8.38845160	4.52447067		85.00000000	0.40400000	3.38893445	1.838091
86	0.54949409	8.20753100	4.50998978		86.00000000	0.39930233	3.27728622	1.859562
87	0.55933416	7.97968530	4.46331057		87.00000000	0.39471264	3.14968268	1.880937
88	0.56945109	7.70100500	4.38534569		88.00000000	0.39022727	3.00514218	1.902329
89	0.57920188	7.34411000	4.25372232		89.00000000	0.38584270	2.83367121	1.923806
90	0.58934784	6.91006090	4.07242947		90.00000000	0.38155556	2.63657213	1.945198
91	0.59917748	6.38762280	3.82731973		91.00000000	0.37736264	2.41045019	1.966546
92	0.60926908	5.76801730	3.51427459		92.00000000	0.37326087	2.15297515	1.988028
93	0.61909354	5.04764990	3.12496745		93.00000000	0.36924731	1.86383116	2.009569
94	0.62915838	4.19283910	2.63795986		94.00000000	0.36531915	1.53172441	2.030951
95	0.63931924	3.20383640	2.04827425		95.00000000	0.36147368	1.15810255	2.052304
96	0.64910126	2.13305930	1.38457148		96.00000000	0.35770833	0.76301309	2.073692
97	0.65914971	0.89227462	0.58814256		97.00000000	0.35402062	0.31588361	2.095180
98	0.66896302	-0.45029226	-0.30122887		98.00000000	0.35040816	-0.15778608	2.116549
99	0.67908591	-1.98583830	-1.34855481		99.00000000	0.34686869	-0.68882512	2.137911
100	0.68883294	-3.62243010	-2.49524918		100.00000000	0.34340000	-1.24394250	2.159298
101	0.69898039	-5.52740140	-3.86354519		101.00000000	0.34000000	-1.87931648	2.180765
20:23 02/04/2018
Test Lot:	JK-PERC
Recipe:	Recipe_YJX-LID
Cell Name:	1-0-5h
Test Order:	7
Test Condition:	Light
1	-0.29982325	9.03420450	-2.70866455		1.00000000	34.34000000	310.23458253	0.000000
2	-0.28999919	9.03584000	-2.62038628		2.00000000	17.17000000	155.14537280	0.061776
3	-0.27989084	9.04219340	-2.53082711		3.00000000	11.44666667	103.50297379	0.083194
4	-0.27003029	9.02574730	-2.43722516		4.00000000	8.58500000	77.48604057	0.104684
5	-0.25988695	9.04362010	-2.35031884		5.00000000	6.86800000	62.11158285	0.126069
6	-0.24970861	9.03919320	-2.25716437		6.00000000	5.72333333	51.73431575	0.147480
7	-0.23989199	9.03645420	-2.16777298		7.00000000	4.90571429	44.33026246	0.168880
8	-0.22976576	9.02646830	-2.07397335		8.00000000	4.29250000	38.74611518	0.190370
9	-0.21993129	9.04704280	-1.98972779		9.00000000	3.81555556	34.51949442	0.211741
10	-0.20976262	9.02180190	-1.89243680		10.00000000	3.43400000	30.98086772	0.233104
11	-0.19998026	9.04571440	-1.80896432		11.00000000	3.12181818	28.23907568	0.254478
12	-0.18980861	9.02080060	-1.71222562		12.00000000	2.86166667	25.81452438	0.275941
13	-0.18002476	9.03820800	-1.62710123		13.00000000	2.64153846	23.87477406	0.297318
14	-0.16986354	9.02848530	-1.53361047		14.00000000	2.45285714	22.14558466	0.318659
15	-0.16006255	9.03530790	-1.44621442		15.00000000	2.28933333	20.68483155	0.340043
16	-0.14991771	9.03617860	-1.35468320		16.00000000	2.14625000	19.39389832	0.361527
17	-0.13976616	9.02688500	-1.26165305		17.00000000	2.02000000	18.23430770	0.382916
18	-0.12994732	9.02825360	-1.17319736		18.00000000	1.90777778	17.22390159	0.404272
19	-0.11984490	9.04933070	-1.08451613		19.00000000	1.80736842	16.35547454	0.425651
20	-0.11000894	9.02670190	-0.99301791		20.00000000	1.71700000	15.49884716	0.447125
21	-0.09983507	9.03181650	-0.90169201		21.00000000	1.63523810	14.76917041	0.468517
22	-0.09003930	9.03906250	-0.81387084		22.00000000	1.56090909	14.10915483	0.489897
23	-0.07987138	9.03369240	-0.72153347		23.00000000	1.49304348	13.48769552	0.511247
24	-0.07007189	9.03971000	-0.63342957		24.00000000	1.43083333	12.93431839	0.532741
25	-0.05991141	9.02923010	-0.54095392		25.00000000	1.37360000	12.40255047	0.554127
26	-0.04977624	9.02937980	-0.44944859		26.00000000	1.32076923	11.92572701	0.575519
27	-0.03993135	9.03798480	-0.36089893		27.00000000	1.27185185	11.49497770	0.596916
28	-0.02979023	9.04015920	-0.26930838		28.00000000	1.22642857	11.08710953	0.618386
29	-0.01997287	9.02066040	-0.18016850		29.00000000	1.18413793	10.68170614	0.639783
30	-0.00984812	9.03012080	-0.08892973		30.00000000	1.14466667	10.33647828	0.661233
31	-0.00064705	9.04059120	-0.00584972		31.00000000	1.10774194	10.01464199	0.682715
32	0.00951024	9.02870080	0.08586511		32.00000000	1.07312500	9.68892455	0.704197
33	0.01931838	9.03570840	0.17455526		33.00000000	1.04060606	9.40261292	0.725576
34	0.02945996	9.02444170	0.26585970		34.00000000	1.01000000	9.11468612	0.746943
35	0.03928746	9.04325290	0.35528639		35.00000000	0.98114286	8.87272299	0.768318
36	0.04946997	9.01912690	0.44617594		36.00000000	0.95388889	8.60324494	0.789798
37	0.05930342	9.04389380	0.53633381		37.00000000	0.92810811	8.39371116	0.811173
38	0.06941672	9.03093240	0.62689768		38.00000000	0.90368421	8.16111102	0.832570
39	0.07957616	9.03305150	0.71881552		39.00000000	0.88051282	7.95371765	0.853908
40	0.08941258	9.03967670	0.80826079		40.00000000	0.85850000	7.76056245	0.875370
41	0.09954300	9.03584000	0.89945460		41.00000000	0.83756098	7.56806697	0.896742
42	0.10938389	9.03148940	0.98789944		42.00000000	0.81761905	7.38431776	0.918125
43	0.11954258	9.02864270	1.07930724		43.00000000	0.79860465	7.21031605	0.939613
44	0.12931873	9.02929310	1.16765672		44.00000000	0.78045455	7.04695284	0.960983
45	0.13949528	9.02604390	1.25909052		45.00000000	0.76311111	6.88787439	0.982325
46	0.14932054	9.02131650	1.34706785		46.00000000	0.74652174	6.73460888	1.003705
47	0.15943682	9.03453540	1.44043759		47.00000000	0.73063830	6.60097757	1.025184
48	0.16961189	9.02154640	1.53016154		48.00000000	0.71541667	6.45416465	1.046565
49	0.17940886	9.03602890	1.62114364		49.00000000	0.70081633	6.33259658	1.067915
50	0.18957575	9.02932170	1.71174043		50.00000000	0.68680000	6.20133814	1.089294
51	0.19937794	9.03303810	1.80098853		51.00000000	0.67333333	6.08224565	1.110778
52	0.20948008	9.03614710	1.89289282		52.00000000	0.66038462	5.96733253	1.132216
53	0.21932320	9.03712650	1.98205150		53.00000000	0.64792453	5.85537592	1.153585
54	0.22946700	9.03690340	2.07367111		54.00000000	0.63592593	5.74680116	1.174981
55	0.23926771	9.03047470	2.16070100		55.00000000	0.62436364	5.63830002	1.196475
56	0.24942268	9.02216240	2.25033193		56.00000000	0.61321429	5.53251887	1.217856
57	0.25956649	9.02759460	2.34326104		57.00000000	0.60245614	5.43872980	1.239212
58	0.26939249	9.03801160	2.43477245		58.00000000	0.59206897	5.35112618	1.260589
59	0.27952665	9.03630260	2.52588739		59.00000000	0.58203390	5.25943443	1.282072
60	0.28935933	9.03989220	2.61577715		60.00000000	0.57233333	5.17383164	1.303464
61	0.29950538	9.01734260	2.70074262		61.00000000	0.56295082	5.07632041	1.324814
62	0.30930236	9.02745720	2.79221382		62.00000000	0.55387097	5.00004646	1.346186
63	0.31943873	9.03078560	2.88478268		63.00000000	0.54507937	4.92249488	1.367660
64	0.32929525	9.02459530	2.97175637		64.00000000	0.53656250	4.84225942	1.389047
65	0.33940184	9.04184820	3.06881992		65.00000000	0.52830769	4.77687796	1.410457
66	0.34925020	9.02576350	3.15224971		66.00000000	0.52030303	4.69613210	1.431867
67	0.35940441	9.02900790	3.24506526		67.00000000	0.51253731	4.62770345	1.453370
68	0.36956534	9.01887610	3.33306401		68.00000000	0.50500000	4.55453243	1.474762
69	0.37939358	9.03129960	3.42641709		69.00000000	0.49768116	4.49470766	1.496137
70	0.38955230	9.02178380	3.51445663		70.00000000	0.49057143	4.42582937	1.517480
71	0.39934257	9.03141120	3.60662696		71.00000000	0.48366197	4.36815015	1.538952
72	0.40952063	9.01941680	3.69363725		72.00000000	0.47694444	4.30176073	1.560326
73	0.41932577	9.02003100	3.78233144		73.00000000	0.47041096	4.24312143	1.581701
74	0.42948747	9.01624970	3.87236627		74.00000000	0.46405405	4.18402723	1.603172
75	0.43931273	9.03401950	3.96875977		75.00000000	0.45786667	4.13637640	1.624563
76	0.44946322	9.00443460	4.04716217		76.00000000	0.45184211	4.06858269	1.645915
77	0.45958397	9.01099110	4.14130706		77.00000000	0.44597403	4.01866798	1.667303
78	0.46942115	9.00823780	4.22865735		78.00000000	0.44025641	3.96593444	1.688775
79	0.47957611	8.99811940	4.31528310		79.00000000	0.43468354	3.91133443	1.710147
80	0.48942518	8.99243740	4.40112529		80.00000000	0.42925000	3.86000375	1.731507
81	0.49954966	8.95641040	4.47417177		81.00000000	0.42395062	3.79707572	1.752878
82	0.50935256	8.96928220	4.56852685		82.00000000	0.41878049	3.75616037	1.774415
83	0.51947778	8.92116450	4.63434673		83.00000000	0.41373494	3.69099746	1.795790
84	0.52929783	8.90133190	4.71145566		84.00000000	0.40880952	3.63894926	1.817126
85	0.53939027	8.82849220	4.76200279		85.00000000	0.40400000	3.56671085	1.838516
86	0.54956537	8.76668830	4.81786830		86.00000000	0.39930233	3.50055903	1.859993
87	0.55938393	8.65209100	4.83984067		87.00000000	0.39471264	3.41508971	1.881423
88	0.56948680	8.51461890	4.84896307		88.00000000	0.39022727	3.32263651	1.902800
89	0.57929569	8.30570410	4.81145859		89.00000000	0.38584270	3.20469527	1.924187
90	0.58942014	8.02873040	4.73229540		90.00000000	0.38155556	3.06340669	1.945674
91	0.59922755	7.65752840	4.58860198		91.00000000	0.37736264	2.88966511	1.967059
92	0.60931551	7.15174480	4.35766903		92.00000000	0.37326087	2.66946648	1.988519
93	0.61915642	6.50848010	4.02976724		93.00000000	0.36924731	2.40323878	2.009926
94	0.62926751	5.64660070	3.55322236		94.00000000	0.36531915	2.06281136	2.031439
95	0.63939267	4.55836630	2.91458600		95.00000000	0.36147368	1.64772946	2.052815
96	0.64917701	3.23522470	2.10023350		96.00000000	0.35770833	1.15726684	2.074176
97	0.65929180	1.56525830	1.03196196		97.00000000	0.35402062	0.55413371	2.095550
98	0.66901809	-0.35514632	-0.23759931		98.00000000	0.35040816	-0.12444617	2.117030
99	0.67910087	-2.72954060	-1.85363340		99.00000000	0.34686869	-0.94679216	2.138470
100	0.68881673	-5.39496180	-3.71613995		100.00000000	0.34340000	-1.85262988	2.159895
101	0.69908929	-8.59774300	-6.01059005		101.00000000	0.34000000	-2.92323262	2.181280
20:23 02/04/2018
Test Lot:	JK-PERC
Recipe:	Recipe_YJX-LID
Cell Name:	1-0-5h
Test Order:	8
Test Condition:	Light
1	-0.29985350	9.03640460	-2.70959755		1.00000000	34.34000000	310.31013396	0.000000
2	-0.29000029	9.03138160	-2.61910328		2.00000000	17.17000000	155.06882207	0.061791
3	-0.27988431	9.03113750	-2.52767369		3.00000000	11.44666667	103.37642058	0.083263
4	-0.27005863	9.05024530	-2.44409685		4.00000000	8.58500000	77.69635590	0.104759
5	-0.25989431	9.02651020	-2.34593864		5.00000000	6.86800000	61.99407205	0.126135
6	-0.24972253	9.03048320	-2.25511511		6.00000000	5.72333333	51.68446551	0.147525
7	-0.23994300	9.03867240	-2.16876617		7.00000000	4.90571429	44.34114432	0.168870
8	-0.22977494	9.02414230	-2.07352176		8.00000000	4.29250000	38.73613082	0.190345
9	-0.21993139	9.04231070	-1.98868796		9.00000000	3.81555556	34.50143883	0.211728
10	-0.20981692	9.02487280	-1.89357101		10.00000000	3.43400000	30.99141320	0.233113
11	-0.20000018	9.02851770	-1.80570517		11.00000000	3.12181818	28.18539071	0.254514
12	-0.18984328	9.03879070	-1.71595367		12.00000000	2.86166667	25.86600605	0.275976
13	-0.18007343	9.03375630	-1.62673948		13.00000000	2.64153846	23.86301472	0.297344
14	-0.16992174	9.02689550	-1.53386579		14.00000000	2.45285714	22.14168511	0.318705
15	-0.16009012	9.03994750	-1.44720628		15.00000000	2.28933333	20.69545314	0.340076
16	-0.14995927	9.02713110	-1.35370199		16.00000000	2.14625000	19.37448012	0.361560
17	-0.13981725	9.03705220	-1.26353579		17.00000000	2.02000000	18.25484544	0.382952
18	-0.12995884	9.03082370	-1.17363537		18.00000000	1.90777778	17.22880477	0.404318
19	-0.11984064	9.03064540	-1.08223832		19.00000000	1.80736842	16.32170332	0.425670
20	-0.11001273	9.02873610	-0.99327591		20.00000000	1.71700000	15.50233988	0.447148
21	-0.09986105	9.05173780	-0.90391602		21.00000000	1.63523810	14.80174648	0.468556
22	-0.09004504	9.02839090	-0.81296184		22.00000000	1.56090909	14.09249743	0.489940
23	-0.07990973	9.01967620	-0.72075993		23.00000000	1.49304348	13.46676873	0.511299
24	-0.07006098	9.04523940	-0.63371836		24.00000000	1.43083333	12.94223004	0.532765
25	-0.05993684	9.02296350	-0.54080788		25.00000000	1.37360000	12.39394266	0.554135
26	-0.04978962	9.03396610	-0.44979769		26.00000000	1.32076923	11.93178446	0.575529
27	-0.03995873	9.02519510	-0.36063533		27.00000000	1.27185185	11.47871110	0.597015
28	-0.02978993	9.04003240	-0.26930189		28.00000000	1.22642857	11.08695402	0.618400
29	-0.01996425	9.02764800	-0.18023020		29.00000000	1.18413793	10.68998042	0.639755
30	-0.00982745	9.03794960	-0.08881998		30.00000000	1.14466667	10.34543964	0.661130
31	-0.00064932	9.03512100	-0.00586672		31.00000000	1.10774194	10.00858242	0.682745
32	0.00950885	9.02802370	0.08584615		32.00000000	1.07312500	9.68819793	0.704135
33	0.01935807	9.02359490	0.17467935		33.00000000	1.04060606	9.39000754	0.725481
34	0.02947746	9.03141310	0.26622310		34.00000000	1.01000000	9.12172723	0.746857
35	0.03930732	9.01965620	0.35453853		35.00000000	0.98114286	8.84957125	0.768338
36	0.04945276	9.04744530	0.44742117		36.00000000	0.95388889	8.63025754	0.789705
37	0.05926178	9.01767160	0.53440331		37.00000000	0.92810811	8.36937413	0.811058
38	0.06942435	9.03040980	0.62693029		38.00000000	0.90368421	8.16063875	0.832443
39	0.07955267	9.02969930	0.71833672		39.00000000	0.88051282	7.95076600	0.853909
40	0.08936095	9.02642150	0.80660956		40.00000000	0.85850000	7.74918286	0.875293
41	0.09950862	9.03106780	0.89866910		41.00000000	0.83756098	7.56406996	0.896637
42	0.10935039	9.02470400	0.98685490		42.00000000	0.81761905	7.37876989	0.918004
43	0.11949211	9.03251740	1.07931456		43.00000000	0.79860465	7.21341041	0.939486
44	0.12933612	9.02495770	1.16725301		44.00000000	0.78045455	7.04356926	0.960853
45	0.13945775	9.03844740	1.26048154		45.00000000	0.76311111	6.89733964	0.982199
46	0.14926974	9.01790900	1.34610093		46.00000000	0.74652174	6.73206511	1.003572
47	0.15943676	9.04118060	1.44149654		47.00000000	0.73063830	6.60583280	1.025044
48	0.16958593	9.02578540	1.53064621		48.00000000	0.71541667	6.45719730	1.046426
49	0.17937337	9.03155800	1.62002099		49.00000000	0.70081633	6.32946330	1.067804
50	0.18953146	9.02083590	1.70973220		50.00000000	0.68680000	6.19551010	1.089172
51	0.19931890	9.02883820	1.79961810		51.00000000	0.67333333	6.07941772	1.110635
52	0.20941968	9.03630450	1.89238000		52.00000000	0.66038462	5.96743647	1.132008
53	0.21929644	9.02459240	1.97906099		53.00000000	0.64792453	5.84725477	1.153381
54	0.22943072	9.02965550	2.07168036		54.00000000	0.63592593	5.74219203	1.174738
55	0.23927547	9.02735810	2.16002535		55.00000000	0.62436364	5.63635413	1.196212
56	0.24940751	9.02590750	2.25112912		56.00000000	0.61321429	5.53481542	1.217626
57	0.25953805	9.03605370	2.34519976		57.00000000	0.60245614	5.44382604	1.239014
58	0.26937389	9.01910880	2.42951242		58.00000000	0.59206897	5.33993442	1.260501
59	0.27953348	9.04023270	2.52704771		59.00000000	0.58203390	5.26172188	1.281885
60	0.28936183	9.02642350	2.61190242		60.00000000	0.57233333	5.16612305	1.303242
61	0.29952887	9.03668790	2.70674892		61.00000000	0.56295082	5.08721086	1.324621
62	0.30934235	9.02171520	2.79079858		62.00000000	0.55387097	4.99686613	1.346094
63	0.31948259	9.04618170	2.89009756		63.00000000	0.54507937	4.93088698	1.367476
64	0.32930279	9.02966400	2.97349355		64.00000000	0.53656250	4.84497909	1.388817
65	0.33945864	9.03755950	3.06787766		65.00000000	0.52830769	4.77461220	1.410191
66	0.34926990	9.02510450	3.15219735		66.00000000	0.52030303	4.69578922	1.431653
67	0.35941458	9.03429320	3.24705670		67.00000000	0.51253731	4.63041237	1.453034
68	0.36958459	9.02482130	3.33543488		68.00000000	0.50500000	4.55753476	1.474404
69	0.37940106	9.02812190	3.42527902		69.00000000	0.49768116	4.49312617	1.495782
70	0.38954577	9.01726630	3.51263794		70.00000000	0.49057143	4.42361321	1.517259
71	0.39938456	9.01547720	3.60064239		71.00000000	0.48366197	4.36044348	1.538643
72	0.40951958	9.02845760	3.69733016		72.00000000	0.47694444	4.30607269	1.559983
73	0.41933975	9.02990250	3.78659706		73.00000000	0.47041096	4.24776509	1.581375
74	0.42945990	9.00768760	3.86844062		74.00000000	0.46405405	4.18005395	1.602864
75	0.43929049	9.01283930	3.95925459		75.00000000	0.45786667	4.12667869	1.624239
76	0.44946274	9.01550770	4.05213479		76.00000000	0.45184211	4.07358598	1.645592
77	0.45958808	8.99934290	4.13599072		77.00000000	0.44597403	4.01347318	1.666966
78	0.46944624	8.99582200	4.22305481		78.00000000	0.44025641	3.96046830	1.688431
79	0.47959390	8.99566650	4.31426678		79.00000000	0.43468354	3.91026820	1.709812
80	0.48936722	8.98330780	4.39613636		80.00000000	0.42925000	3.85608487	1.731178
81	0.49952829	8.96993160	4.48073459		81.00000000	0.42395062	3.80280804	1.752538
82	0.50936556	8.95629410	4.56202776		82.00000000	0.41878049	3.75072121	1.774006
83	0.51950061	8.92858220	4.63840390		83.00000000	0.41373494	3.69406642	1.795388
84	0.52926123	8.88452530	4.70223479		84.00000000	0.40880952	3.63207856	1.816762
85	0.53940523	8.84240530	4.76963966		85.00000000	0.40400000	3.57233174	1.838124
86	0.54954767	8.75530620	4.81145812		86.00000000	0.39930233	3.49601413	1.859595
87	0.55936861	8.64841560	4.83765221		87.00000000	0.39471264	3.41363899	1.880976
88	0.56951034	8.51444240	4.84906299		88.00000000	0.39022727	3.32256764	1.902362
89	0.57930446	8.30206680	4.80942432		89.00000000	0.38584270	3.20329184	1.923842
90	0.58942312	8.03340820	4.73507653		90.00000000	0.38155556	3.06519153	1.945241
91	0.59926188	7.66809230	4.59519541		91.00000000	0.37736264	2.89365153	1.966628
92	0.60936266	7.16185240	4.36416543		92.00000000	0.37326087	2.67323925	1.988098
93	0.61916649	6.51997280	4.03694867		93.00000000	0.36924731	2.40748243	2.009623
94	0.62924641	5.66121960	3.56230211		94.00000000	0.36531915	2.06815193	2.030994
95	0.63936734	4.55106400	2.90980168		95.00000000	0.36147368	1.64508987	2.052334
96	0.64916813	3.24744440	2.10813741		96.00000000	0.35770833	1.16163792	2.073770
97	0.65928012	1.55980400	1.02834777		97.00000000	0.35402062	0.55220278	2.095254
98	0.66900873	-0.36645135	-0.24515915		98.00000000	0.35040816	-0.12840754	2.116626
99	0.67911774	-2.74036030	-1.86102729		99.00000000	0.34686869	-0.95054518	2.137988
100	0.68879277	-5.40994220	-3.72632907		100.00000000	0.34340000	-1.85777415	2.159368
101	0.69911909	-8.62904170	-6.03272778		101.00000000	0.34000000	-2.93387418	2.180852
