# Supplementary material for: Study on the Electrical Injection Regeneration of Industrialized B-Doped Czochralski Silicon PERC Solar Cells
Source: Hindawi journal article supplement (doi:10.1155/2019/5357370), 2019-06-20
Supplement: f1 [file 5357370.f1.zip › section3.2/IVRawData_1-0-7h.csv]

22:05 02/04/2018
Test Lot:	JK-PERC
Recipe:	Recipe_YJX-LID
Cell Name:	1-0-7h
Test Order:	2
Test Condition:	Light
1	-0.29990295	8.64422130	-2.59242747		1.00000000	34.34000000	296.84255944	0.000000
2	-0.29006341	8.63515280	-2.50474187		2.00000000	17.17000000	148.26557358	0.061797
3	-0.27993953	8.63338380	-2.41682540		3.00000000	11.44666667	98.82346656	0.083208
4	-0.27012902	8.65665910	-2.33841484		4.00000000	8.58500000	74.31741837	0.104708
5	-0.25998434	8.62684350	-2.24284421		5.00000000	6.86800000	59.24916116	0.126085
6	-0.24982773	8.65192130	-2.16148986		6.00000000	5.72333333	49.51782957	0.147454
7	-0.23999861	8.62645150	-2.07033637		7.00000000	4.90571429	42.31890636	0.168830
8	-0.22981670	8.65455150	-1.98896047		8.00000000	4.29250000	37.14966231	0.190321
9	-0.22001438	8.64327810	-1.90164547		9.00000000	3.81555556	32.97890777	0.211697
10	-0.20985925	8.64178470	-1.81355846		10.00000000	3.43400000	29.67588866	0.233033
11	-0.20009489	8.65223980	-1.73126897		11.00000000	3.12181818	27.01071952	0.254412
12	-0.18989140	8.63906100	-1.64048339		12.00000000	2.86166667	24.72211290	0.275897
13	-0.18008684	8.65296270	-1.55828471		13.00000000	2.64153846	22.85713378	0.297276
14	-0.16999499	8.63623710	-1.46811704		14.00000000	2.45285714	21.18345586	0.318616
15	-0.16011153	8.64830300	-1.38469303		15.00000000	2.28933333	19.79884833	0.340002
16	-0.14998843	8.63937850	-1.29580682		16.00000000	2.14625000	18.54226611	0.361490
17	-0.13984670	8.64529230	-1.20901560		17.00000000	2.02000000	17.46349045	0.382869
18	-0.13003768	8.64795780	-1.12456037		18.00000000	1.90777778	16.49838171	0.404234
19	-0.11991978	8.64997390	-1.03730297		19.00000000	1.80736842	15.63368967	0.425620
20	-0.11004749	8.63882060	-0.95068052		20.00000000	1.71700000	14.83285497	0.447088
21	-0.09989386	8.64393230	-0.86347577		21.00000000	1.63523810	14.13488739	0.468473
22	-0.09009451	8.64196010	-0.77859320		22.00000000	1.56090909	13.48931408	0.489854
23	-0.07995131	8.64435010	-0.69112711		23.00000000	1.49304348	12.90639054	0.511210
24	-0.07013781	8.65814780	-0.60726356		24.00000000	1.43083333	12.38836648	0.532683
25	-0.05999014	8.64546300	-0.51864255		25.00000000	1.37360000	11.87540798	0.554066
26	-0.04984396	8.62455370	-0.42988188		26.00000000	1.32076923	11.39104516	0.575453
27	-0.04001781	8.65437130	-0.34632901		27.00000000	1.27185185	11.00707816	0.596846
28	-0.02989024	8.62995430	-0.25795137		28.00000000	1.22642857	10.58402252	0.618294
29	-0.02004474	8.64485360	-0.17328388		29.00000000	1.18413793	10.23669906	0.639680
30	-0.00991865	8.63285160	-0.08562626		30.00000000	1.14466667	9.88173746	0.661052
31	-0.00066562	8.64957620	-0.00575730		31.00000000	1.10774194	9.58149828	0.682647
32	0.00945580	8.64062980	0.08170408		32.00000000	1.07312500	9.27247585	0.704045
33	0.01926306	8.64390950	0.16650810		33.00000000	1.04060606	8.99490461	0.725397
34	0.02947817	8.64107040	0.25472294		34.00000000	1.01000000	8.72748110	0.746788
35	0.03926533	8.64119050	0.33929917		35.00000000	0.98114286	8.47824234	0.768277
36	0.04942909	8.64454170	0.42729182		36.00000000	0.95388889	8.24593228	0.789652
37	0.05924676	8.63318540	0.51148830		37.00000000	0.92810811	8.01252937	0.811024
38	0.06938671	8.64092160	0.59956509		38.00000000	0.90368421	7.80866441	0.832396
39	0.07952665	8.62298490	0.68575708		39.00000000	0.88051282	7.59264876	0.853868
40	0.08935177	8.65362170	0.77321638		40.00000000	0.85850000	7.42913423	0.875244
41	0.09948725	8.63371940	0.85894496		41.00000000	0.83756098	7.23126644	0.896588
42	0.10933916	8.63487430	0.94412990		42.00000000	0.81761905	7.06003770	0.917949
43	0.11948207	8.64325810	1.03271437		43.00000000	0.79860465	6.90254612	0.939442
44	0.12927072	8.65235520	1.11849619		44.00000000	0.78045455	6.75276994	0.960815
45	0.13945606	8.63817500	1.20464585		45.00000000	0.76311111	6.59188732	0.982150
46	0.14925587	8.63631920	1.28902134		46.00000000	0.74652174	6.44720003	1.003535
47	0.15937722	8.63799290	1.37669929		47.00000000	0.73063830	6.31124843	1.025013
48	0.16955660	8.64395430	1.46563950		48.00000000	0.71541667	6.18402897	1.046405
49	0.17938991	8.64094830	1.55009894		49.00000000	0.70081633	6.05571765	1.067745
50	0.18951720	8.64489840	1.63835694		50.00000000	0.68680000	5.93731622	1.089115
51	0.19929765	8.64190480	1.72231132		51.00000000	0.67333333	5.81888257	1.110598
52	0.20943685	8.63915630	1.80935768		52.00000000	0.66038462	5.70516591	1.131967
53	0.21922550	8.63523480	1.89306367		53.00000000	0.64792453	5.59498043	1.153354
54	0.22939521	8.64728160	1.98364498		54.00000000	0.63592593	5.49903056	1.174716
55	0.23923597	8.63637920	2.06613256		55.00000000	0.62436364	5.39224112	1.196191
56	0.24934316	8.64429000	2.15539458		56.00000000	0.61321429	5.30080212	1.217568
57	0.25950915	8.63383580	2.24055939		57.00000000	0.60245614	5.20150739	1.238954
58	0.26929483	8.63262080	2.32472015		58.00000000	0.59206897	5.11110687	1.260351
59	0.27950695	8.64180280	2.41544394		59.00000000	0.58203390	5.02982217	1.281828
60	0.28930005	8.63421150	2.49787782		60.00000000	0.57233333	4.94164705	1.303217
61	0.29944819	8.63896750	2.58692318		61.00000000	0.56295082	4.86331384	1.324598
62	0.30924132	8.64437290	2.67319729		62.00000000	0.55387097	4.78786718	1.346075
63	0.31945419	8.63141250	2.75734089		63.00000000	0.54507937	4.70480485	1.367453
64	0.32926443	8.64542290	2.84663024		64.00000000	0.53656250	4.63880972	1.388797
65	0.33939469	8.62930010	2.92873863		65.00000000	0.52830769	4.55892562	1.410181
66	0.34922948	8.64559650	3.01929717		66.00000000	0.52030303	4.49833006	1.431659
67	0.35937017	8.63185310	3.10203052		67.00000000	0.51253731	4.42414680	1.453031
68	0.36951905	8.64376260	3.19403494		68.00000000	0.50500000	4.36510011	1.474393
69	0.37934268	8.63379100	3.27516542		69.00000000	0.49768116	4.29687512	1.495774
70	0.38949156	8.63579850	3.36357063		70.00000000	0.49057143	4.23647601	1.517255
71	0.39932781	8.62994960	3.44617887		71.00000000	0.48366197	4.17397844	1.538649
72	0.40947819	8.64084150	3.53823614		72.00000000	0.47694444	4.12120135	1.560005
73	0.41928694	8.62434010	3.61607317		73.00000000	0.47041096	4.05698410	1.581378
74	0.42944622	8.61851790	3.70118993		74.00000000	0.46405405	3.99945817	1.602863
75	0.43926391	8.62057020	3.78670537		75.00000000	0.45786667	3.94707174	1.624236
76	0.44943511	8.61149690	3.87030906		76.00000000	0.45184211	3.89103689	1.645587
77	0.45954156	8.58476540	3.94505648		77.00000000	0.44597403	3.82858239	1.666959
78	0.46940464	8.60219670	4.03791105		78.00000000	0.44025641	3.78717224	1.688438
79	0.47957733	8.56519790	4.10767474		79.00000000	0.43468354	3.72315058	1.709829
80	0.48936075	8.55450920	4.18624104		80.00000000	0.42925000	3.67202307	1.731170
81	0.49948955	8.51539610	4.25335137		81.00000000	0.42395062	3.61010743	1.752544
82	0.50931168	8.46548270	4.31156922		82.00000000	0.41878049	3.54517897	1.774024
83	0.51944941	8.40388580	4.36539352		83.00000000	0.41373494	3.47698119	1.795411
84	0.52923357	8.29811100	4.39163891		84.00000000	0.40880952	3.39234681	1.816818
85	0.53937501	8.17375560	4.40871951		85.00000000	0.40400000	3.30219726	1.838187
86	0.54949856	7.96389480	4.37614872		86.00000000	0.39930233	3.18000171	1.859664
87	0.55931252	7.68802640	4.30000942		87.00000000	0.39471264	3.03456123	1.881036
88	0.56943309	7.30859900	4.16175811		88.00000000	0.39022727	2.85201466	1.902431
89	0.57923961	6.79325630	3.93492313		89.00000000	0.38584270	2.62112833	1.923781
90	0.58933043	6.09601880	3.59256938		90.00000000	0.38155556	2.32596984	1.945268
91	0.59911984	5.21699810	3.12560707		91.00000000	0.37736264	1.96870016	1.966645
92	0.60925162	4.06191060	2.47472561		92.00000000	0.37326087	1.51615228	1.988126
93	0.61901718	2.68165400	1.65998990		93.00000000	0.36924731	0.99019353	2.009672
94	0.62912810	0.94910431	0.59710819		94.00000000	0.36531915	0.34672598	2.031058
95	0.63918096	-1.09385260	-0.69916975		95.00000000	0.36147368	-0.39539893	2.052417
96	0.64895099	-3.36973710	-2.18679423		96.00000000	0.35770833	-1.20538304	2.073803
97	0.65905815	-6.07936570	-4.00665551		97.00000000	0.35402062	-2.15222081	2.095282
98	0.66902024	-9.04813670	-6.05338659		98.00000000	0.35040816	-3.17054096	2.116652
99	0.67194897	-10.00014900	-6.71958982		99.00000000	0.34686869	-3.46873855	2.138007
100	0.67193031	-10.00001300	-6.71931184		100.00000000	0.34340000	-3.43400446	2.159383
101	0.67192888	-10.00007500	-6.71933919		101.00000000	0.34000000	-3.40002550	2.180863
22:06 02/04/2018
Test Lot:	JK-PERC
Recipe:	Recipe_YJX-LID
Cell Name:	1-0-7h
Test Order:	3
Test Condition:	Light
1	-0.29991856	8.64939880	-2.59411523		1.00000000	34.34000000	297.02035479	0.000000
2	-0.29011941	8.63658810	-2.50564184		2.00000000	17.17000000	148.29021768	0.061755
3	-0.27993542	8.64094920	-2.41890774		3.00000000	11.44666667	98.91006518	0.083274
4	-0.27014741	8.64216040	-2.33465725		4.00000000	8.58500000	74.19294703	0.104662
5	-0.25997907	8.65509410	-2.25014331		5.00000000	6.86800000	59.44318628	0.126009
6	-0.24979882	8.62553690	-2.15464894		6.00000000	5.72333333	49.36682286	0.147391
7	-0.23997435	8.64665990	-2.07497659		7.00000000	4.90571429	42.41804300	0.168880
8	-0.22983949	8.64003940	-1.98582225		8.00000000	4.29250000	37.08736912	0.190245
9	-0.22003809	8.64383320	-1.90197255		9.00000000	3.81555556	32.98102579	0.211607
10	-0.20988016	8.63837240	-1.81302298		10.00000000	3.43400000	29.66417082	0.232988
11	-0.20001847	8.65270810	-1.73070144		11.00000000	3.12181818	27.01218147	0.254459
12	-0.18989404	8.63608070	-1.63994025		12.00000000	2.86166667	24.71358427	0.275863
13	-0.18009783	8.63919160	-1.55589966		13.00000000	2.64153846	22.82075689	0.297207
14	-0.16994439	8.63966080	-1.46826188		14.00000000	2.45285714	21.19185371	0.318579
15	-0.16012065	8.64308830	-1.38393692		15.00000000	2.28933333	19.78691015	0.340082
16	-0.14999771	8.63534640	-1.29528219		16.00000000	2.14625000	18.53361221	0.361459
17	-0.13982564	8.64850230	-1.20928237		17.00000000	2.02000000	17.46997465	0.382856
18	-0.13003838	8.62880800	-1.12207621		18.00000000	1.90777778	16.46184815	0.404225
19	-0.11985664	8.63695720	-1.03519667		19.00000000	1.80736842	15.61016370	0.425700
20	-0.11005821	8.65293980	-0.95232707		20.00000000	1.71700000	14.85709764	0.447088
21	-0.09987945	8.62875650	-0.86183546		21.00000000	1.63523810	14.11007134	0.468464
22	-0.09005497	8.63943390	-0.77802393		22.00000000	1.56090909	13.48537091	0.489803
23	-0.07989928	8.63372330	-0.68982828		23.00000000	1.49304348	12.89052427	0.511273
24	-0.07006586	8.63691230	-0.60515271		24.00000000	1.43083333	12.35798202	0.532647
25	-0.05995260	8.64478400	-0.51827729		25.00000000	1.37360000	11.87447530	0.554021
26	-0.04981329	8.64186000	-0.43047947		26.00000000	1.32076923	11.41390278	0.575502
27	-0.03998731	8.64444730	-0.34566823		27.00000000	1.27185185	10.99445631	0.596957
28	-0.02983461	8.63566880	-0.25764178		28.00000000	1.22642857	10.59103095	0.618333
29	-0.02003766	8.63930510	-0.17311148		29.00000000	1.18413793	10.23012887	0.639723
30	-0.00986486	8.64112470	-0.08524345		30.00000000	1.14466667	9.89120741	0.661070
31	-0.00065440	8.63515660	-0.00565087		31.00000000	1.10774194	9.56552509	0.682667
32	0.00946758	8.64497470	0.08184703		32.00000000	1.07312500	9.27713847	0.704065
33	0.01927988	8.63554670	0.16649230		33.00000000	1.04060606	8.98620223	0.725462
34	0.02942932	8.64380260	0.25438125		34.00000000	1.01000000	8.73024063	0.746825
35	0.03926544	8.63838770	0.33919005		35.00000000	0.98114286	8.47549239	0.768305
36	0.04938511	8.63931850	0.42665368		36.00000000	0.95388889	8.24094992	0.789678
37	0.05925546	8.63331220	0.51157084		37.00000000	0.92810811	8.01264705	0.811115
38	0.06937587	8.64572720	0.59980487		38.00000000	0.90368421	7.81300716	0.832496
39	0.07948289	8.63019470	0.68595282		39.00000000	0.88051282	7.59899708	0.853982
40	0.08936515	8.63838100	0.77197019		40.00000000	0.85850000	7.41605009	0.875381
41	0.09950417	8.65003300	0.86071438		41.00000000	0.83756098	7.24493008	0.896761
42	0.10930604	8.63067910	0.94338535		42.00000000	0.81761905	7.05660763	0.918246
43	0.11945996	8.63779350	1.03187047		43.00000000	0.79860465	6.89818206	0.939654
44	0.12928043	8.64732930	1.11793045		44.00000000	0.78045455	6.74884746	0.961005
45	0.13943955	8.62698940	1.20294352		45.00000000	0.76311111	6.58335147	0.982371
46	0.14927419	8.63823890	1.28946611		46.00000000	0.74652174	6.44863313	1.003857
47	0.15942362	8.64252950	1.37782334		47.00000000	0.73063830	6.31456304	1.025241
48	0.16958646	8.63131330	1.46375387		48.00000000	0.71541667	6.17498539	1.046600
49	0.17938462	8.63820080	1.54956037		49.00000000	0.70081633	6.05379215	1.067976
50	0.18952587	8.63009170	1.63562564		50.00000000	0.68680000	5.92714698	1.089455
51	0.19932924	8.65257450	1.72471110		51.00000000	0.67333333	5.82606683	1.110851
52	0.20946082	8.62426570	1.80644577		52.00000000	0.66038462	5.69533239	1.132182
53	0.21927832	8.63674350	1.89385060		53.00000000	0.64792453	5.59595796	1.153558
54	0.22943819	8.63236810	1.98059491		54.00000000	0.63592593	5.48954668	1.175050
55	0.23926388	8.64438340	2.06828871		55.00000000	0.62436364	5.39723865	1.196419
56	0.24940737	8.63038540	2.15248172		56.00000000	0.61321429	5.29227562	1.217759
57	0.25954640	8.63880830	2.24217159		57.00000000	0.60245614	5.20450311	1.239135
58	0.26936018	8.63609600	2.32622037		58.00000000	0.59206897	5.11316442	1.260614
59	0.27950591	8.63244630	2.41281976		59.00000000	0.58203390	5.02437637	1.281984
60	0.28933904	8.63803670	2.49932125		60.00000000	0.57233333	4.94383634	1.303338
61	0.29947209	8.63525680	2.58601840		61.00000000	0.56295082	4.86122489	1.324720
62	0.30929258	8.63362310	2.67031556		62.00000000	0.55387097	4.78191318	1.346193
63	0.31943980	8.64359760	2.76110909		63.00000000	0.54507937	4.71144669	1.367566
64	0.32923126	8.62860110	2.84080521		64.00000000	0.53656250	4.62978378	1.388929
65	0.33939111	8.64522650	2.93411302		65.00000000	0.52830769	4.56733966	1.410301
66	0.34922275	8.62616630	3.01245352		66.00000000	0.52030303	4.48822047	1.431777
67	0.35938337	8.63431550	3.10302940		67.00000000	0.51253731	4.42540887	1.453167
68	0.36953133	8.62864590	3.18855500		68.00000000	0.50500000	4.35746618	1.474557
69	0.37937412	8.62191870	3.27093282		69.00000000	0.49768116	4.29096650	1.495913
70	0.38950050	8.63397980	3.36293945		70.00000000	0.49057143	4.23558380	1.517395
71	0.39933214	8.62569900	3.44451884		71.00000000	0.48366197	4.17192259	1.538780
72	0.40948009	8.62540530	3.53193174		72.00000000	0.47694444	4.11383914	1.560164
73	0.41928497	8.62246320	3.61526922		73.00000000	0.47041096	4.05610118	1.581643
74	0.42942250	8.61494830	3.69945264		74.00000000	0.46405405	3.99780168	1.603036
75	0.43924296	8.61925410	3.78594668		75.00000000	0.45786667	3.94646914	1.624393
76	0.44942665	8.60569760	3.86762984		76.00000000	0.45184211	3.88841652	1.645769
77	0.45953515	8.61316390	3.95805156		77.00000000	0.44597403	3.84124738	1.667250
78	0.46942782	8.57292460	4.02436931		78.00000000	0.44025641	3.77428501	1.688621
79	0.47952369	8.57416440	4.11151495		79.00000000	0.43468354	3.72704817	1.709989
80	0.48935682	8.54714870	4.18260551		80.00000000	0.42925000	3.66886358	1.731363
81	0.49951670	8.51077080	4.25127214		81.00000000	0.42395062	3.60814653	1.752843
82	0.50929922	8.46084980	4.30910420		82.00000000	0.41878049	3.54323881	1.774235
83	0.51944119	8.40370940	4.36523281		83.00000000	0.41373494	3.47690820	1.795575
84	0.52923566	8.29208850	4.38846893		84.00000000	0.40880952	3.38988475	1.816959
85	0.53938061	8.16270160	4.40280297		85.00000000	0.40400000	3.29773145	1.838446
86	0.54950476	7.95889570	4.37345107		86.00000000	0.39930233	3.17800556	1.859826
87	0.55931783	7.69674970	4.30492934		87.00000000	0.39471264	3.03800442	1.881167
88	0.56945384	7.30278060	4.15859646		88.00000000	0.39022727	2.84974416	1.902548
89	0.57921851	6.80069540	3.93908866		89.00000000	0.38584270	2.62399865	1.924028
90	0.58934414	6.10342030	3.59701499		90.00000000	0.38155556	2.32879392	1.945418
91	0.59915495	5.21984340	3.12749501		91.00000000	0.37736264	1.96977387	1.966761
92	0.60925454	4.06858400	2.47880327		92.00000000	0.37326087	1.51864320	1.988234
93	0.61908317	2.67491270	1.65599343		93.00000000	0.36924731	0.98770432	2.009742
94	0.62917012	0.94097006	0.59203025		94.00000000	0.36531915	0.34375438	2.031181
95	0.63917738	-1.09857130	-0.70218193		95.00000000	0.36147368	-0.39710462	2.052602
96	0.64891899	-3.39160630	-2.20087773		96.00000000	0.35770833	-1.21320584	2.073981
97	0.65904611	-6.09855840	-4.01923119		97.00000000	0.35402062	-2.15901542	2.095459
98	0.66901171	-9.09419350	-6.08412194		98.00000000	0.35040816	-3.18667964	2.116846
99	0.67179823	-10.00019700	-6.71811464		99.00000000	0.34686869	-3.46875520	2.138242
100	0.67180419	-10.00007700	-6.71809363		100.00000000	0.34340000	-3.43402644	2.159581
101	0.67175508	-10.00005500	-6.71758775		101.00000000	0.34000000	-3.40001870	2.181059
22:06 02/04/2018
Test Lot:	JK-PERC
Recipe:	Recipe_YJX-LID
Cell Name:	1-0-7h
Test Order:	4
Test Condition:	Light
1	-0.29991284	8.64095880	-2.59153449		1.00000000	34.34000000	296.73052519	0.000000
2	-0.29006508	8.63850210	-2.50572780		2.00000000	17.17000000	148.32308106	0.061736
3	-0.27992040	8.63807300	-2.41797285		3.00000000	11.44666667	98.87714227	0.083244
4	-0.27009276	8.64530940	-2.33503548		4.00000000	8.58500000	74.21998120	0.104634
5	-0.25996369	8.63237760	-2.24410473		5.00000000	6.86800000	59.28716936	0.126044
6	-0.24978399	8.64095690	-2.15837269		6.00000000	5.72333333	49.45507666	0.147441
7	-0.23993999	8.64345840	-2.07391132		7.00000000	4.90571429	42.40233735	0.168927
8	-0.22982281	8.62851050	-1.98302853		8.00000000	4.29250000	37.03788132	0.190296
9	-0.22002718	8.64398570	-1.90191180		9.00000000	3.81555556	32.98160766	0.211652
10	-0.20985122	8.63304810	-1.81165568		10.00000000	3.43400000	29.64588718	0.233026
11	-0.20003103	8.64121060	-1.72851026		11.00000000	3.12181818	26.97628836	0.254505
12	-0.18987292	8.64116570	-1.64072336		12.00000000	2.86166667	24.72813584	0.275882
13	-0.18009070	8.64379880	-1.55666778		13.00000000	2.64153846	22.83292698	0.297236
14	-0.16992812	8.63773630	-1.46779429		14.00000000	2.45285714	21.18713318	0.318611
15	-0.16010867	8.64347360	-1.38389506		15.00000000	2.28933333	19.78779223	0.340098
16	-0.14993493	8.64024930	-1.29547517		16.00000000	2.14625000	18.54413506	0.361488
17	-0.13987881	8.63229560	-1.20747524		17.00000000	2.02000000	17.43723711	0.382836
18	-0.13001247	8.64218710	-1.12359209		18.00000000	1.90777778	16.48737250	0.404217
19	-0.11986329	8.64315510	-1.03599701		19.00000000	1.80736842	15.62136559	0.425697
20	-0.11005129	8.63876440	-0.95070717		20.00000000	1.71700000	14.83275847	0.447080
21	-0.09989840	8.63829990	-0.86295232		21.00000000	1.63523810	14.12567707	0.468449
22	-0.09009532	8.64614200	-0.77897692		22.00000000	1.56090909	13.49584165	0.489810
23	-0.07992978	8.63791660	-0.69042674		23.00000000	1.49304348	12.89678505	0.511284
24	-0.07012671	8.64116100	-0.60597615		24.00000000	1.43083333	12.36406120	0.532672
25	-0.05996041	8.63166520	-0.51755822		25.00000000	1.37360000	11.85645532	0.554052
26	-0.04981199	8.64434810	-0.43059217		26.00000000	1.32076923	11.41718899	0.575421
27	-0.04002975	8.61786170	-0.34497088		27.00000000	1.27185185	10.96064336	0.596889
28	-0.02988133	8.64929100	-0.25845228		28.00000000	1.22642857	10.60773761	0.618272
29	-0.02005071	8.62074380	-0.17285207		29.00000000	1.18413793	10.20814973	0.639658
30	-0.00989484	8.64905930	-0.08558109		30.00000000	1.14466667	9.90028988	0.661142
31	-0.00066041	8.63878250	-0.00570513		31.00000000	1.10774194	9.56954165	0.682648
32	0.00948855	8.63102250	0.08189592		32.00000000	1.07312500	9.26216602	0.704012
33	0.01931368	8.63077740	0.16669206		33.00000000	1.04060606	8.98123927	0.725389
34	0.02947298	8.63989540	0.25464346		34.00000000	1.01000000	8.72629435	0.746864
35	0.03928991	8.64162450	0.33952868		35.00000000	0.98114286	8.47866815	0.768235
36	0.04945219	8.63475040	0.42700734		36.00000000	0.95388889	8.23659246	0.789581
37	0.05927434	8.63558480	0.51186857		37.00000000	0.92810811	8.01475627	0.810963
38	0.06938526	8.64863010	0.60008745		38.00000000	0.90368421	7.81563046	0.832447
39	0.07951405	8.63170340	0.68634169		39.00000000	0.88051282	7.60032551	0.853810
40	0.08938234	8.64313130	0.77254333		40.00000000	0.85850000	7.42012822	0.875170
41	0.09949922	8.63265610	0.85894253		41.00000000	0.83756098	7.23037587	0.896541
42	0.10930424	8.64638230	0.94508625		42.00000000	0.81761905	7.06944686	0.917994
43	0.11947769	8.63023660	1.03112073		43.00000000	0.79860465	6.89214709	0.939384
44	0.12932588	8.64776420	1.11837972		44.00000000	0.78045455	6.74918688	0.960729
45	0.13947253	8.63595870	1.20447901		45.00000000	0.76311111	6.59019604	0.982101
46	0.14927755	8.65017890	1.29127751		46.00000000	0.74652174	6.45754660	1.003596
47	0.15946960	8.63764290	1.37744146		47.00000000	0.73063830	6.31099271	1.024976
48	0.16959020	8.64060970	1.46536273		48.00000000	0.71541667	6.18163619	1.046335
49	0.17938928	8.63421150	1.54888498		49.00000000	0.70081633	6.05099639	1.067716
50	0.18951732	8.63964370	1.63736212		50.00000000	0.68680000	5.93370729	1.089196
51	0.19930375	8.64139270	1.72226197		51.00000000	0.67333333	5.81853775	1.110585
52	0.20943029	8.63240910	1.80788794		52.00000000	0.66038462	5.70071016	1.131945
53	0.21927924	8.63332560	1.89310908		53.00000000	0.64792453	5.59374342	1.153303
54	0.22940505	8.63958550	1.98196454		54.00000000	0.63592593	5.49413641	1.174777
55	0.23923539	8.63547330	2.06591082		55.00000000	0.62436364	5.39167551	1.196150
56	0.24939170	8.65553090	2.15861757		56.00000000	0.61321429	5.30769520	1.217531
57	0.25953537	8.62046340	2.23731516		57.00000000	0.60245614	5.19345111	1.238892
58	0.26936272	8.63765910	2.32666335		58.00000000	0.59206897	5.11408989	1.260375
59	0.27950343	8.63316540	2.41299934		59.00000000	0.58203390	5.02479491	1.281739
60	0.28933078	8.63969040	2.49972836		60.00000000	0.57233333	4.94478281	1.303135
61	0.29946551	8.63639260	2.58630171		61.00000000	0.56295082	4.86186429	1.324629
62	0.30930775	8.64100740	2.67273056		62.00000000	0.55387097	4.78600313	1.346021
63	0.31943953	8.61922170	2.75332013		63.00000000	0.54507937	4.69815989	1.367378
64	0.32928178	8.63965230	2.84488009		64.00000000	0.53656250	4.63571344	1.388743
65	0.33944032	8.63906290	2.93244628		65.00000000	0.52830769	4.56408338	1.410226
66	0.34922600	8.63589570	3.01587931		66.00000000	0.52030303	4.49328270	1.431619
67	0.35938457	8.62590220	3.10001615		67.00000000	0.51253731	4.42109674	1.452960
68	0.36953121	8.62915800	3.18874320		68.00000000	0.50500000	4.35772479	1.474342
69	0.37937272	8.63414480	3.27555900		69.00000000	0.49768116	4.29705119	1.495820
70	0.38950521	8.64327340	3.36660002		70.00000000	0.49057143	4.24014298	1.517194
71	0.39932886	8.62536530	3.44435729		71.00000000	0.48366197	4.17176119	1.538557
72	0.40950379	8.62877750	3.53351709		72.00000000	0.47694444	4.11544749	1.559933
73	0.41930583	8.61921020	3.61408509		73.00000000	0.47041096	4.05457094	1.581404
74	0.42944875	8.61333270	3.69898496		74.00000000	0.46405405	3.99705196	1.602790
75	0.43929100	8.61468600	3.78435403		75.00000000	0.45786667	3.94437756	1.624141
76	0.44945028	8.60861300	3.86914352		76.00000000	0.45184211	3.88973382	1.645564
77	0.45958281	8.60553550	3.95495619		77.00000000	0.44597403	3.83784531	1.667083
78	0.46942952	8.58925630	4.03205046		78.00000000	0.44025641	3.78147515	1.688472
79	0.47956350	8.57870770	4.11403509		79.00000000	0.43468354	3.72902307	1.709826
80	0.48938715	8.54112050	4.17991462		80.00000000	0.42925000	3.66627597	1.731196
81	0.49948242	8.51470280	4.25294436		81.00000000	0.42395062	3.60981351	1.752668
82	0.50929791	8.46199040	4.30967403		82.00000000	0.41878049	3.54371647	1.774054
83	0.51945943	8.40000440	4.36346150		83.00000000	0.41373494	3.47537531	1.795415
84	0.52923024	8.30307670	4.39423927		84.00000000	0.40880952	3.39437683	1.816771
85	0.53936124	8.16255860	4.40256773		85.00000000	0.40400000	3.29767367	1.838238
86	0.54948705	7.96790080	4.37825831		86.00000000	0.39930233	3.18160132	1.859622
87	0.55931288	7.69274140	4.30264935		87.00000000	0.39471264	3.03642230	1.881018
88	0.56942755	7.31682730	4.16640304		88.00000000	0.39022727	2.85522556	1.902388
89	0.57923704	6.80675700	3.94272578		89.00000000	0.38584270	2.62633748	1.923867
90	0.58933902	6.11171870	3.60187431		90.00000000	0.38155556	2.33196022	1.945244
91	0.59915227	5.22901870	3.13297842		91.00000000	0.37736264	1.97323629	1.966634
92	0.60927808	4.07997940	2.48584202		92.00000000	0.37326087	1.52289666	1.988184
93	0.61905777	2.68520000	1.66229392		93.00000000	0.36924731	0.99150288	2.009592
94	0.62916273	0.94758481	0.59618505		94.00000000	0.36531915	0.34617088	2.030941
95	0.63919109	-1.10403000	-0.70568614		95.00000000	0.36147368	-0.39907779	2.052317
96	0.64897674	-3.40186690	-2.20773249		96.00000000	0.35770833	-1.21687614	2.073807
97	0.65906906	-6.14021440	-4.04682533		97.00000000	0.35402062	-2.17376250	2.095186
98	0.66905344	-9.14378260	-6.11767920		98.00000000	0.35040816	-3.20405607	2.116593
99	0.67160559	-10.00015300	-6.71615866		99.00000000	0.34686869	-3.46873994	2.137983
100	0.67160779	-10.00008600	-6.71613566		100.00000000	0.34340000	-3.43402953	2.159486
101	0.67161894	-10.00002400	-6.71620552		101.00000000	0.34000000	-3.40000816	2.180867
