# Supplementary material for: Study on the Electrical Injection Regeneration of Industrialized B-Doped Czochralski Silicon PERC Solar Cells
Source: Hindawi journal article supplement (doi:10.1155/2019/5357370), 2019-06-20
Supplement: f1 [file 5357370.f1.zip › section3.2/IVRawData_1-0-8h.csv]

23:04 02/04/2018
Test Lot:	JK-PERC
Recipe:	Recipe_YJX-LID
Cell Name:	1-0-8h
Test Order:	2
Test Condition:	Light
1	-0.29985911	8.63193610	-2.58836468		1.00000000	34.34000000	296.42068567	0.000000
2	-0.29003191	8.62113290	-2.50040364		2.00000000	17.17000000	148.02485189	0.061843
3	-0.27990773	8.62429140	-2.41400583		3.00000000	11.44666667	98.71938889	0.083269
4	-0.27007756	8.61843590	-2.32764614		4.00000000	8.58500000	73.98927220	0.104800
5	-0.25993475	8.63344190	-2.24413156		5.00000000	6.86800000	59.29447897	0.126200
6	-0.24975996	8.62125590	-2.15324453		6.00000000	5.72333333	49.34232127	0.147550
7	-0.23994169	8.62954810	-2.07058836		7.00000000	4.90571429	42.33409739	0.168928
8	-0.22979814	8.59945110	-1.97613787		8.00000000	4.29250000	36.91314385	0.190411
9	-0.22000220	8.63306620	-1.89929356		9.00000000	3.81555556	32.93994370	0.211792
10	-0.20985569	8.61606790	-1.80813087		10.00000000	3.43400000	29.58757717	0.233143
11	-0.20004784	8.61173250	-1.72275849		11.00000000	3.12181818	26.88426310	0.254530
12	-0.18988495	8.62588020	-1.63792483		12.00000000	2.86166667	24.68439384	0.276007
13	-0.18010092	8.62124250	-1.55269371		13.00000000	2.64153846	22.77334365	0.297382
14	-0.16994546	8.61125660	-1.46344396		14.00000000	2.45285714	21.12218226	0.318764
15	-0.16011752	8.63229370	-1.38218146		15.00000000	2.28933333	19.76219771	0.340121
16	-0.14996283	8.61669350	-1.29218374		16.00000000	2.14625000	18.49357842	0.361593
17	-0.13982747	8.62622070	-1.20618262		17.00000000	2.02000000	17.42496581	0.382972
18	-0.13000771	8.60818290	-1.11913015		18.00000000	1.90777778	16.42250004	0.404351
19	-0.11986344	8.62598900	-1.03394071		19.00000000	1.80736842	15.59034012	0.425757
20	-0.11003102	8.62649440	-0.94918198		20.00000000	1.71700000	14.81169088	0.447215
21	-0.09987260	8.62334540	-0.86123590		21.00000000	1.63523810	14.10122291	0.468603
22	-0.09006698	8.61519810	-0.77594485		22.00000000	1.56090909	13.44754103	0.489972
23	-0.07991749	8.62010100	-0.68889684		23.00000000	1.49304348	12.87018558	0.511333
24	-0.07007391	8.62140460	-0.60413553		24.00000000	1.43083333	12.33579308	0.532810
25	-0.05991474	8.62284280	-0.51663540		25.00000000	1.37360000	11.84433687	0.554196
26	-0.04978758	8.61523340	-0.42893163		26.00000000	1.32076923	11.37873519	0.575557
27	-0.03995293	8.62004280	-0.34439600		27.00000000	1.27185185	10.96341740	0.596925
28	-0.02980196	8.60999490	-0.25659468		28.00000000	1.22642857	10.55954375	0.618394
29	-0.01999187	8.62031840	-0.17233629		29.00000000	1.18413793	10.20764600	0.639762
30	-0.00984164	8.62039850	-0.08483882		30.00000000	1.14466667	9.86748282	0.661135
31	-0.00067762	8.62687970	-0.00584573		31.00000000	1.10774194	9.55635642	0.682602
32	0.00950665	8.61858270	0.08193383		32.00000000	1.07312500	9.24881656	0.704077
33	0.01929487	8.61755280	0.16627454		33.00000000	1.04060606	8.96747767	0.725471
34	0.02945449	8.62192540	0.25395440		34.00000000	1.01000000	8.70814465	0.746862
35	0.03929034	8.60742190	0.33818855		35.00000000	0.98114286	8.44511052	0.768342
36	0.04943806	8.63254070	0.42677603		36.00000000	0.95388889	8.23448466	0.789732
37	0.05926275	8.60811420	0.51014048		37.00000000	0.92810811	7.98926058	0.811077
38	0.06939334	8.62092400	0.59823474		38.00000000	0.90368421	7.79059290	0.832451
39	0.07955594	8.61547370	0.68541214		39.00000000	0.88051282	7.58603505	0.853931
40	0.08934267	8.61826710	0.76997898		40.00000000	0.85850000	7.39878231	0.875302
41	0.09949634	8.62724690	0.85837951		41.00000000	0.83756098	7.22584533	0.896636
42	0.10930763	8.61690040	0.94189296		42.00000000	0.81761905	7.04534190	0.918018
43	0.11943227	8.62196830	1.02974125		43.00000000	0.79860465	6.88554399	0.939508
44	0.12929939	8.61295890	1.11365033		44.00000000	0.78045455	6.72202292	0.960925
45	0.13941361	8.61493110	1.20103864		45.00000000	0.76311111	6.57414964	0.982301
46	0.14926361	8.62503910	1.28740447		46.00000000	0.74652174	6.43877919	1.003670
47	0.15941131	8.61175250	1.37281075		47.00000000	0.73063830	6.29207619	1.025137
48	0.16958210	8.63316150	1.46402966		48.00000000	0.71541667	6.17630762	1.046518
49	0.17936511	8.61798380	1.54576561		49.00000000	0.70081633	6.03962375	1.067855
50	0.18953367	8.61127190	1.63212597		50.00000000	0.68680000	5.91422154	1.089238
51	0.19929434	8.62086870	1.71809034		51.00000000	0.67333333	5.80471826	1.110724
52	0.20943312	8.61671160	1.80462479		52.00000000	0.66038462	5.69034378	1.132099
53	0.21925111	8.61792370	1.88948934		53.00000000	0.64792453	5.58376415	1.153464
54	0.22941297	8.62482260	1.97864617		54.00000000	0.63592593	5.48474830	1.174835
55	0.23921087	8.61023710	2.05966231		55.00000000	0.62436364	5.37591895	1.196313
56	0.24936603	8.61878300	2.14923170		56.00000000	0.61321429	5.28516086	1.217703
57	0.25954127	8.61480140	2.23589650		57.00000000	0.60245614	5.19004000	1.239061
58	0.26936820	8.61068920	2.31944585		58.00000000	0.59206897	5.09812185	1.260427
59	0.27954271	8.61989780	2.40962959		59.00000000	0.58203390	5.01707272	1.281910
60	0.28935772	8.60399530	2.48963246		60.00000000	0.57233333	4.92435331	1.303284
61	0.29945853	8.61407380	2.57955788		61.00000000	0.56295082	4.84929991	1.324680
62	0.30931598	8.61598780	2.66506271		62.00000000	0.55387097	4.77214550	1.346040
63	0.31942275	8.61639310	2.75227198		63.00000000	0.54507937	4.69661808	1.367509
64	0.32928392	8.61784170	2.83771670		64.00000000	0.53656250	4.62401069	1.388886
65	0.33941525	8.60310270	2.92002425		65.00000000	0.52830769	4.54508533	1.410264
66	0.34924367	8.61743450	3.00958445		66.00000000	0.52030303	4.48367728	1.431743
67	0.35941297	8.61888790	3.09774010		67.00000000	0.51253731	4.41750165	1.453127
68	0.36954355	8.61071590	3.18203452		68.00000000	0.50500000	4.34841153	1.474479
69	0.37938240	8.61057090	3.26669905		69.00000000	0.49768116	4.28531891	1.495848
70	0.38952044	8.60772040	3.35288304		70.00000000	0.49057143	4.22270169	1.517329
71	0.39932576	8.59830000	3.43352268		71.00000000	0.48366197	4.15867073	1.538705
72	0.40948838	8.59773730	3.52067352		72.00000000	0.47694444	4.10064304	1.560047
73	0.41930786	8.60414220	3.60778445		73.00000000	0.47041096	4.04748278	1.581416
74	0.42944142	8.59266280	3.69004531		74.00000000	0.46405405	3.98746001	1.602913
75	0.43926984	8.58422370	3.77079057		75.00000000	0.45786667	3.93042989	1.624293
76	0.44941011	8.57763480	3.85487580		76.00000000	0.45184211	3.87573657	1.645640
77	0.45954144	8.57552430	3.94080879		77.00000000	0.44597403	3.82446110	1.666998
78	0.46942568	8.55458550	4.01574212		78.00000000	0.44025641	3.76621110	1.688473
79	0.47954661	8.54713440	4.09874933		79.00000000	0.43468354	3.71529867	1.709846
80	0.48936236	8.51115800	4.16504037		80.00000000	0.42925000	3.65341457	1.731199
81	0.49947509	8.47886370	4.23498121		81.00000000	0.42395062	3.59461950	1.752589
82	0.50930423	8.42906950	4.29296075		82.00000000	0.41878049	3.52992984	1.774076
83	0.51945198	8.36452870	4.34497099		83.00000000	0.41373494	3.46069778	1.795444
84	0.52920145	8.24797530	4.36484049		84.00000000	0.40880952	3.37185085	1.816806
85	0.53937823	8.13608170	4.38842535		85.00000000	0.40400000	3.28697701	1.838174
86	0.54949689	7.91777520	4.35079285		86.00000000	0.39930233	3.16158605	1.859660
87	0.55927843	7.64622450	4.27636843		87.00000000	0.39471264	3.01806149	1.881051
88	0.56943285	7.25453470	4.13097037		88.00000000	0.39022727	2.83091729	1.902420
89	0.57921213	6.75149680	3.91054884		89.00000000	0.38584270	2.60501573	1.923788
90	0.58933824	6.04159550	3.56054326		90.00000000	0.38155556	2.30520433	1.945266
91	0.59917635	5.16521220	3.09487299		91.00000000	0.37736264	1.94915810	1.966644
92	0.60923624	4.00271750	2.43860056		92.00000000	0.37326087	1.49405781	1.988130
93	0.61906683	2.62046070	1.62224030		93.00000000	0.36924731	0.96759807	2.009494
94	0.62921232	0.90280312	0.56805485		94.00000000	0.36531915	0.32981127	2.030976
95	0.63921344	-1.13794150	-0.72738750		95.00000000	0.36147368	-0.41133591	2.052365
96	0.64896441	-3.41533400	-2.21643021		96.00000000	0.35770833	-1.22169343	2.073748
97	0.65905708	-6.10489700	-4.02347559		97.00000000	0.35402062	-2.16125941	2.095244
98	0.66900533	-9.06834130	-6.06676866		98.00000000	0.35040816	-3.17762082	2.116657
99	0.67192221	-10.00025100	-6.71939075		99.00000000	0.34686869	-3.46877393	2.138018
100	0.67186266	-10.00022700	-6.71877911		100.00000000	0.34340000	-3.43407795	2.159401
101	0.67182916	-10.00016400	-6.71840178		101.00000000	0.34000000	-3.40005576	2.180896
23:04 02/04/2018
Test Lot:	JK-PERC
Recipe:	Recipe_YJX-LID
Cell Name:	1-0-8h
Test Order:	3
Test Condition:	Light
1	-0.29984793	8.62243560	-2.58541947		1.00000000	34.34000000	296.09443850	0.000000
2	-0.29002073	8.62331010	-2.50093869		2.00000000	17.17000000	148.06223442	0.021499
3	-0.27985412	8.61834720	-2.41187997		3.00000000	11.44666667	98.65134762	0.042888
4	-0.27004629	8.60918710	-2.32487904		4.00000000	8.58500000	73.90987125	0.064272
5	-0.25991911	8.62428190	-2.24161568		5.00000000	6.86800000	59.23156809	0.085776
6	-0.24976070	8.60934540	-2.15027613		6.00000000	5.72333333	49.27415351	0.107176
7	-0.23996326	8.61068440	-2.06624790		7.00000000	4.90571429	42.24155747	0.128519
8	-0.22978549	8.62141990	-1.98107720		8.00000000	4.29250000	37.00744492	0.149897
9	-0.21995158	8.62218380	-1.89646295		9.00000000	3.81555556	32.89842130	0.171421
10	-0.20981550	8.62006950	-1.80862419		10.00000000	3.43400000	29.60131866	0.192823
11	-0.19999945	8.62080190	-1.72415564		11.00000000	3.12181818	26.91257611	0.214184
12	-0.18985964	8.62051490	-1.63668786		12.00000000	2.86166667	24.66904014	0.235559
13	-0.18009347	8.61263470	-1.55107927		13.00000000	2.64153846	22.75060582	0.257048
14	-0.16991718	8.61771970	-1.46429863		14.00000000	2.45285714	21.13803532	0.278436
15	-0.16013911	8.61728290	-1.37996401		15.00000000	2.28933333	19.72783299	0.299831
16	-0.14998291	8.61924840	-1.29273996		16.00000000	2.14625000	18.49906188	0.321192
17	-0.13983120	8.61050890	-1.20401779		17.00000000	2.02000000	17.39322798	0.342666
18	-0.12999804	8.63570980	-1.12262535		18.00000000	1.90777778	16.47501525	0.364050
19	-0.11986790	8.60027890	-1.03089737		19.00000000	1.80736842	15.54387250	0.385431
20	-0.11007196	8.60090350	-0.94671831		20.00000000	1.71700000	14.76775131	0.406786
21	-0.09988748	8.63385390	-0.86241393		21.00000000	1.63523810	14.11840681	0.428256
22	-0.09008484	8.62831690	-0.77728057		22.00000000	1.56090909	13.46801829	0.449637
23	-0.07989442	8.62053200	-0.68873237		23.00000000	1.49304348	12.87082908	0.471024
24	-0.07009475	8.61444760	-0.60382754		24.00000000	1.43083333	12.32583877	0.492492
25	-0.05995345	8.61933520	-0.51675886		25.00000000	1.37360000	11.83951883	0.513940
26	-0.04980917	8.61805530	-0.42925814		26.00000000	1.32076923	11.38246227	0.535314
27	-0.04000355	8.62508960	-0.34503419		27.00000000	1.27185185	10.96983618	0.556691
28	-0.02981461	8.60623360	-0.25659148		28.00000000	1.22642857	10.55493078	0.578051
29	-0.02002016	8.62841030	-0.17274211		29.00000000	1.18413793	10.21722792	0.599548
30	-0.00985131	8.60376170	-0.08475833		30.00000000	1.14466667	9.84843923	0.620919
31	-0.00069325	8.63247870	-0.00598446		31.00000000	1.10774194	9.56255866	0.642442
32	0.00947762	8.62000470	0.08169713		32.00000000	1.07312500	9.25034254	0.663813
33	0.01928296	8.61321540	0.16608827		33.00000000	1.04060606	8.96296415	0.685288
34	0.02947086	8.61663530	0.25393968		34.00000000	1.01000000	8.70280165	0.706687
35	0.03925462	8.62117100	0.33842077		35.00000000	0.98114286	8.45860035	0.728080
36	0.04942168	8.62075040	0.42605199		36.00000000	0.95388889	8.22323802	0.749481
37	0.05924340	8.61919690	0.51063050		37.00000000	0.92810811	7.99954653	0.770965
38	0.06936953	8.61495490	0.59761533		38.00000000	0.90368421	7.78519872	0.792349
39	0.07953808	8.61901660	0.68554001		39.00000000	0.88051282	7.58915462	0.813729
40	0.08933746	8.62173840	0.77024422		40.00000000	0.85850000	7.40176242	0.835222
41	0.09948517	8.61718270	0.85728192		41.00000000	0.83756098	7.21741595	0.856599
42	0.10932326	8.61751270	0.94209458		42.00000000	0.81761905	7.04584253	0.877973
43	0.11947544	8.61766340	1.02959913		43.00000000	0.79860465	6.88210607	0.899350
44	0.12928897	8.60809420	1.11293163		44.00000000	0.78045455	6.71822625	0.920834
45	0.13943370	8.61474130	1.20118525		45.00000000	0.76311111	6.57400481	0.942217
46	0.14924574	8.62234590	1.28684839		46.00000000	0.74652174	6.43676866	0.963574
47	0.15940982	8.60950090	1.37243899		47.00000000	0.73063830	6.29043108	0.984959
48	0.16952851	8.61239620	1.46004670		48.00000000	0.71541667	6.16145178	1.006433
49	0.17931375	8.61079120	1.54403326		49.00000000	0.70081633	6.03458306	1.027799
50	0.18947114	8.61954400	1.63315483		50.00000000	0.68680000	5.91990282	1.049151
51	0.19929807	8.62289140	1.71852561		51.00000000	0.67333333	5.80608021	1.070525
52	0.20942420	8.62148280	1.80554714		52.00000000	0.66038462	5.69349460	1.092007
53	0.21924815	8.59894280	1.88530230		53.00000000	0.64792453	5.57146596	1.113390
54	0.22940627	8.62826540	1.97937818		54.00000000	0.63592593	5.48693766	1.134732
55	0.23920193	8.61013700	2.05956139		55.00000000	0.62436364	5.37585645	1.156101
56	0.24936529	8.60944080	2.14689570		56.00000000	0.61321429	5.27943209	1.177573
57	0.25948247	8.61189750	2.23463643		57.00000000	0.60245614	5.18829053	1.198947
58	0.26934364	8.61413380	2.32016215		58.00000000	0.59206897	5.10016129	1.220289
59	0.27949730	8.61445900	2.40771803		59.00000000	0.58203390	5.01390715	1.241673
60	0.28929371	8.61396500	2.49196589		60.00000000	0.57233333	4.93005930	1.263154
61	0.29946747	8.60998820	2.57841138		61.00000000	0.56295082	4.84699991	1.284525
62	0.30927652	8.61836910	2.66545920		62.00000000	0.55387097	4.77346443	1.305913
63	0.31940714	8.60660740	2.74901185		63.00000000	0.54507937	4.69128410	1.327270
64	0.32925341	8.62123970	2.83857257		64.00000000	0.53656250	4.62583393	1.348799
65	0.33937657	8.60174940	2.91923221		65.00000000	0.52830769	4.54437038	1.370191
66	0.34924665	8.62012480	3.01054971		66.00000000	0.52030303	4.48507706	1.391574
67	0.35939735	8.60514740	3.09266717		67.00000000	0.51253731	4.41045913	1.412947
68	0.36953166	8.62028980	3.18547000		68.00000000	0.50500000	4.35324635	1.434425
69	0.37934816	8.60330960	3.26364967		69.00000000	0.49768116	4.28170510	1.455797
70	0.38950256	8.59865380	3.34919767		70.00000000	0.49057143	4.21825388	1.477186
71	0.39935553	8.61452390	3.44025776		71.00000000	0.48366197	4.16651762	1.498668
72	0.40946826	8.58853440	3.51673224		72.00000000	0.47694444	4.09625377	1.520044
73	0.41930190	8.60782240	3.60927629		73.00000000	0.47041096	4.04921399	1.541403
74	0.42941016	8.58449550	3.68626959		74.00000000	0.46405405	3.98366994	1.562774
75	0.43924677	8.59876730	3.77698076		75.00000000	0.45786667	3.93708892	1.584244
76	0.44942126	8.57570740	3.85410523		76.00000000	0.45184211	3.87486569	1.605634
77	0.45954368	8.57086470	3.93868671		77.00000000	0.44597403	3.82238304	1.626981
78	0.46938846	8.56408790	4.01988403		78.00000000	0.44025641	3.77039460	1.648345
79	0.47956595	8.54023550	4.09560615		79.00000000	0.43468354	3.71229984	1.669840
80	0.48938096	8.51924710	4.16915732		80.00000000	0.42925000	3.65688682	1.691217
81	0.49949890	8.47620490	4.23385502		81.00000000	0.42395062	3.59349230	1.712576
82	0.50931317	8.42049880	4.28867094		82.00000000	0.41878049	3.52634060	1.733950
83	0.51945716	8.36983490	4.34777067		83.00000000	0.41373494	3.46289314	1.755421
84	0.52922082	8.26034160	4.37154476		84.00000000	0.40880952	3.37690632	1.776802
85	0.53935516	8.09531780	4.36625143		85.00000000	0.40400000	3.27050839	1.798154
86	0.54947454	7.93104550	4.35790758		86.00000000	0.39930233	3.16688491	1.819533
87	0.55932158	7.62540530	4.26505374		87.00000000	0.39471264	3.00984389	1.841010
88	0.56938893	7.24609800	4.12584799		88.00000000	0.39022727	2.82762506	1.862379
89	0.57923645	6.71901180	3.89189654		89.00000000	0.38584270	2.59248163	1.883779
90	0.58933127	6.03236910	3.55506374		90.00000000	0.38155556	2.30168394	1.945495
91	0.59918785	5.14581300	3.08330863		91.00000000	0.37736264	1.94183757	1.966892
92	0.60924768	3.99138000	2.43173900		92.00000000	0.37326087	1.48982597	1.988369
93	0.61906338	2.59168310	1.60441610		93.00000000	0.36924731	0.95697202	2.009880
94	0.62920505	0.88640422	0.55773001		94.00000000	0.36531915	0.32382044	2.031266
95	0.63923806	-1.14687060	-0.73312334		95.00000000	0.36147368	-0.41456354	2.052673
96	0.64898831	-3.41339210	-2.21525157		96.00000000	0.35770833	-1.22099880	2.074047
97	0.65908903	-6.09733300	-4.01868529		97.00000000	0.35402062	-2.15858160	2.095516
98	0.66903943	-9.03711610	-6.04618700		98.00000000	0.35040816	-3.16667925	2.116892
99	0.67204934	-10.00014800	-6.72059286		99.00000000	0.34686869	-3.46873821	2.138281
100	0.67204416	-10.00014600	-6.72053972		100.00000000	0.34340000	-3.43405014	2.159630
101	0.67204636	-10.00001000	-6.72047032		101.00000000	0.34000000	-3.40000340	2.181157
23:04 02/04/2018
Test Lot:	JK-PERC
Recipe:	Recipe_YJX-LID
Cell Name:	1-0-8h
Test Order:	4
Test Condition:	Light
1	-0.29988128	8.62476830	-2.58640656		1.00000000	34.34000000	296.17454342	0.000000
2	-0.29006970	8.61890220	-2.50008238		2.00000000	17.17000000	147.98655077	0.061726
3	-0.27994180	8.61799910	-2.41253818		3.00000000	11.44666667	98.64736303	0.083241
4	-0.27010345	8.62482450	-2.32959485		4.00000000	8.58500000	74.04411833	0.104627
5	-0.25996512	8.61905100	-2.24065263		5.00000000	6.86800000	59.19564227	0.125974
6	-0.24979629	8.62731460	-2.15507118		6.00000000	5.72333333	49.37699723	0.147377
7	-0.23997281	8.62044240	-2.06867179		7.00000000	4.90571429	42.28942743	0.168869
8	-0.22982854	8.61962320	-1.98103542		8.00000000	4.29250000	36.99973259	0.190252
9	-0.22000059	8.61547470	-1.89540952		9.00000000	3.81555556	32.87282236	0.211676
10	-0.20988311	8.61957840	-1.80910392		10.00000000	3.43400000	29.59963223	0.233071
11	-0.20006707	8.62478640	-1.72553574		11.00000000	3.12181818	26.92501500	0.254555
12	-0.18991759	8.60712050	-1.63464358		12.00000000	2.86166667	24.63070983	0.275942
13	-0.18011197	8.62119200	-1.55277987		13.00000000	2.64153846	22.77321025	0.297285
14	-0.16992900	8.62626170	-1.46585202		14.00000000	2.45285714	21.15898763	0.318647
15	-0.16014273	8.60642810	-1.37825689		15.00000000	2.28933333	19.70298273	0.340118
16	-0.14999251	8.62461280	-1.29362732		16.00000000	2.14625000	18.51057522	0.361489
17	-0.13981920	8.62202260	-1.20552430		17.00000000	2.02000000	17.41648565	0.382836
18	-0.13003072	8.61192320	-1.11981457		18.00000000	1.90777778	16.42963570	0.404213
19	-0.11986039	8.61498360	-1.03259529		19.00000000	1.80736842	15.57044931	0.425686
20	-0.11002128	8.61839490	-0.94820684		20.00000000	1.71700000	14.79778404	0.447056
21	-0.09987254	8.59841920	-0.85874594		21.00000000	1.63523810	14.06046263	0.468462
22	-0.09005651	8.62123680	-0.77639849		22.00000000	1.56090909	13.45696690	0.489807
23	-0.07993159	8.60612770	-0.68790144		23.00000000	1.49304348	12.84932284	0.511279
24	-0.07010439	8.61983300	-0.60428813		24.00000000	1.43083333	12.33354438	0.532649
25	-0.05995341	8.61804960	-0.51668150		25.00000000	1.37360000	11.83775293	0.554028
26	-0.04979797	8.62727450	-0.42962077		26.00000000	1.32076923	11.39463871	0.575505
27	-0.03998045	8.61098190	-0.34427096		27.00000000	1.27185185	10.95189328	0.596970
28	-0.02984213	8.61798100	-0.25717892		28.00000000	1.22642857	10.56933813	0.618340
29	-0.01999633	8.61739830	-0.17231630		29.00000000	1.18413793	10.20418819	0.639727
30	-0.00986098	8.61534790	-0.08495578		30.00000000	1.14466667	9.86170156	0.661080
31	-0.00068655	8.61970620	-0.00591785		31.00000000	1.10774194	9.54841003	0.682690
32	0.00947762	8.61260600	0.08162698		32.00000000	1.07312500	9.24240281	0.704071
33	0.01929039	8.60592370	0.16601163		33.00000000	1.04060606	8.95537636	0.725486
34	0.02944480	8.62203600	0.25387412		34.00000000	1.01000000	8.70825636	0.746841
35	0.03926874	8.61279580	0.33821364		35.00000000	0.98114286	8.45038308	0.768326
36	0.04938742	8.61438270	0.42544212		36.00000000	0.95388889	8.21716394	0.789699
37	0.05920615	8.61273770	0.50992701		37.00000000	0.92810811	7.99355169	0.811079
38	0.06934790	8.61506370	0.59743660		38.00000000	0.90368421	7.78529704	0.832443
39	0.07948891	8.61523060	0.68481530		39.00000000	0.88051282	7.58582099	0.853930
40	0.08932476	8.60858250	0.76895954		40.00000000	0.85850000	7.39046808	0.875315
41	0.09946428	8.62611480	0.85799032		41.00000000	0.83756098	7.22489713	0.896695
42	0.10927780	8.60896970	0.94076927		42.00000000	0.81761905	7.03885761	0.918176
43	0.11942551	8.61307620	1.02862102		43.00000000	0.79860465	6.87844271	0.939560
44	0.12925242	8.61803630	1.11390205		44.00000000	0.78045455	6.72598560	0.960933
45	0.13940236	8.61493020	1.20094160		45.00000000	0.76311111	6.57414896	0.982314
46	0.14922184	8.61339470	1.28530661		46.00000000	0.74652174	6.43008639	1.003792
47	0.15940379	8.60884950	1.37228324		47.00000000	0.73063830	6.28995515	1.025166
48	0.16952842	8.61980820	1.46130246		48.00000000	0.71541667	6.16675445	1.046508
49	0.17934641	8.60770420	1.54376085		49.00000000	0.70081633	6.03241964	1.067892
50	0.18950155	8.61892700	1.63330003		50.00000000	0.68680000	5.91947906	1.089375
51	0.19930764	8.62378980	1.71878719		51.00000000	0.67333333	5.80668513	1.110759
52	0.20942929	8.61733530	1.80472241		52.00000000	0.66038462	5.69075566	1.132099
53	0.21926217	8.61514760	1.88897596		53.00000000	0.64792453	5.58196544	1.153476
54	0.22938754	8.60444160	1.97375169		54.00000000	0.63592593	5.47178749	1.174952
55	0.23921892	8.61533450	2.06095101		55.00000000	0.62436364	5.37910158	1.196322
56	0.24939120	8.62400340	2.15075056		56.00000000	0.61321429	5.28836208	1.217680
57	0.25950393	8.60919950	2.23412110		57.00000000	0.60245614	5.18666510	1.239061
58	0.26934946	8.61799620	2.32125262		58.00000000	0.59206897	5.10244809	1.260550
59	0.27948675	8.60830690	2.40590772		59.00000000	0.58203390	5.01032642	1.281921
60	0.28933153	8.60836030	2.49067006		60.00000000	0.57233333	4.92685155	1.303277
61	0.29947028	8.61215500	2.57908447		61.00000000	0.56295082	4.84821972	1.324650
62	0.30926594	8.60969540	2.66268554		62.00000000	0.55387097	4.76866032	1.346122
63	0.31943822	8.60267640	2.74802364		63.00000000	0.54507937	4.68914139	1.367502
64	0.32927108	8.60783960	2.83431264		64.00000000	0.53656250	4.61864394	1.388864
65	0.33941433	8.60859870	2.92188176		65.00000000	0.52830769	4.54798891	1.410229
66	0.34924200	8.59892850	3.00310699		66.00000000	0.52030303	4.47404856	1.431692
67	0.35937631	8.61258600	3.09515938		67.00000000	0.51253731	4.41427169	1.453076
68	0.36949423	8.60140320	3.17816885		68.00000000	0.50500000	4.34370862	1.474482
69	0.37934721	8.60966680	3.26605308		69.00000000	0.49768116	4.28486896	1.495822
70	0.38949046	8.59942910	3.34939560		70.00000000	0.49057143	4.21863422	1.517293
71	0.39932257	8.60046670	3.43436047		71.00000000	0.48366197	4.15971868	1.538677
72	0.40945464	8.60074040	3.52161306		72.00000000	0.47694444	4.10207535	1.560061
73	0.41927189	8.59837720	3.60505786		73.00000000	0.47041096	4.04477086	1.581548
74	0.42943001	8.59383960	3.69045263		74.00000000	0.46405405	3.98800611	1.602930
75	0.43921971	8.58346460	3.77002683		75.00000000	0.45786667	3.93008232	1.624286
76	0.44938082	8.58392050	3.85744923		76.00000000	0.45184211	3.87857671	1.645651
77	0.45951959	8.57449150	3.94014682		77.00000000	0.44597403	3.82400049	1.667133
78	0.46940383	8.54726980	4.01212118		78.00000000	0.44025641	3.76299032	1.688512
79	0.47953665	8.54510210	4.09768963		79.00000000	0.43468354	3.71441527	1.709915
80	0.48936358	8.51671790	4.16777156		80.00000000	0.42925000	3.65580116	1.731296
81	0.49946886	8.47557640	4.23328648		81.00000000	0.42395062	3.59322585	1.752776
82	0.50931662	8.43081760	4.29395552		82.00000000	0.41878049	3.53066191	1.774162
83	0.51943010	8.35079290	4.33765319		83.00000000	0.41373494	3.45501480	1.795510
84	0.52922577	8.25105190	4.36666930		84.00000000	0.40880952	3.37310860	1.816873
85	0.53933328	8.11775210	4.37817387		85.00000000	0.40400000	3.27957185	1.838348
86	0.54947203	7.91375780	4.34838856		86.00000000	0.39930233	3.15998189	1.859720
87	0.55931902	7.63797710	4.27206587		87.00000000	0.39471264	3.01480613	1.881060
88	0.56940347	7.24905920	4.12763946		88.00000000	0.39022727	2.82878060	1.902445
89	0.57922667	6.73948760	3.90369096		89.00000000	0.38584270	2.60038207	1.923921
90	0.58933347	6.04406640	3.56197062		90.00000000	0.38155556	2.30614711	1.945301
91	0.59913653	5.15216400	3.08684966		91.00000000	0.37736264	1.94423420	1.966672
92	0.60926491	4.00471690	2.43993348		92.00000000	0.37326087	1.49480411	1.988142
93	0.61903375	2.60388640	1.61189356		93.00000000	0.36924731	0.96147805	2.009647
94	0.62914127	0.88797808	0.55866366		94.00000000	0.36531915	0.32439540	2.031026
95	0.63919967	-1.16445090	-0.74431663		95.00000000	0.36147368	-0.42091836	2.052387
96	0.64894474	-3.44663600	-2.23667630		96.00000000	0.35770833	-1.23289042	2.073759
97	0.65903366	-6.15646170	-4.05731549		97.00000000	0.35402062	-2.17951438	2.095235
98	0.66898632	-9.12978460	-6.10770100		98.00000000	0.35040816	-3.19915105	2.116605
99	0.67166805	-10.00044200	-6.71697738		99.00000000	0.34686869	-3.46884018	2.137988
100	0.67162782	-10.00049500	-6.71661066		100.00000000	0.34340000	-3.43416998	2.159346
101	0.67162561	-10.00053000	-6.71661206		101.00000000	0.34000000	-3.40018020	2.180819
23:12 02/04/2018
Test Lot:	JK-PERC
Recipe:	Recipe_YJX-LID
Cell Name:	1-0-8h
Test Order:	5
Test Condition:	Light
1	-0.29982391	9.07617860	-2.72125536		1.00000000	34.34000000	311.67597312	0.000000
2	-0.28999767	9.08483600	-2.63458127		2.00000000	17.17000000	155.98663412	0.061730
3	-0.27987966	9.09885600	-2.54658472		3.00000000	11.44666667	104.15157168	0.083097
4	-0.27003482	9.08439540	-2.45310308		4.00000000	8.58500000	77.98953451	0.104600
5	-0.25988111	9.10016440	-2.36496083		5.00000000	6.86800000	62.49992910	0.125978
6	-0.24973556	9.08865640	-2.26976070		6.00000000	5.72333333	52.01741013	0.147358
7	-0.23992273	9.08903500	-2.18066609		7.00000000	4.90571429	44.58820884	0.168716
8	-0.22976306	9.10300830	-2.09153504		8.00000000	4.29250000	39.07466313	0.190206
9	-0.21995468	9.07286930	-1.99562006		9.00000000	3.81555556	34.61803686	0.211580
10	-0.20979203	9.11017890	-1.91124293		10.00000000	3.43400000	31.28435434	0.232963
11	-0.19997101	9.07894520	-1.81552584		11.00000000	3.12181818	28.34281620	0.254452
12	-0.18982324	9.08264350	-1.72409682		12.00000000	2.86166667	25.99149815	0.275834
13	-0.18000817	9.09891610	-1.63787924		13.00000000	2.64153846	24.03513684	0.297205
14	-0.16987379	9.07387730	-1.54141393		14.00000000	2.45285714	22.25692475	0.318584
15	-0.16007063	9.09526820	-1.45588531		15.00000000	2.28933333	20.82210067	0.340073
16	-0.14993551	9.08338450	-1.36192189		16.00000000	2.14625000	19.49521398	0.361449
17	-0.13975202	9.08206460	-1.26923687		17.00000000	2.02000000	18.34577049	0.382796
18	-0.12992951	9.09154510	-1.18126000		18.00000000	1.90777778	17.34464771	0.404176
19	-0.11981449	9.08574770	-1.08860423		19.00000000	1.80736842	16.42129347	0.425649
20	-0.10998602	9.09011650	-0.99978574		20.00000000	1.71700000	15.60773003	0.447028
21	-0.09982560	9.08430390	-0.90684607		21.00000000	1.63523810	14.85499981	0.468386
22	-0.08998969	9.08496480	-0.81755318		22.00000000	1.56090909	14.18080415	0.489767
23	-0.07986052	9.08974460	-0.72591176		23.00000000	1.49304348	13.57138389	0.511246
24	-0.07004397	9.08253190	-0.63617656		24.00000000	1.43083333	12.99558939	0.532638
25	-0.05989471	9.08273700	-0.54400791		25.00000000	1.37360000	12.47604754	0.553994
26	-0.04974173	9.08583930	-0.45194537		26.00000000	1.32076923	12.00029698	0.575411
27	-0.03992889	9.09268470	-0.36306084		27.00000000	1.27185185	11.56454787	0.596891
28	-0.02979527	9.09038540	-0.27085046		28.00000000	1.22642857	11.14870838	0.618263
29	-0.01999285	9.08807180	-0.18169647		29.00000000	1.18413793	10.76153054	0.639622
30	-0.00983838	9.08588600	-0.08939042		30.00000000	1.14466667	10.40031084	0.661002
31	-0.00063885	9.09544660	-0.00581062		31.00000000	1.10774194	10.07540762	0.682603
32	0.00950797	9.07643510	0.08629846		32.00000000	1.07312500	9.74014942	0.703999
33	0.01933392	9.08462620	0.17564145		33.00000000	1.04060606	9.45351708	0.725356
34	0.02945386	9.08951090	0.26772122		34.00000000	1.01000000	9.18040601	0.746713
35	0.03930214	9.08498290	0.35705931		35.00000000	0.98114286	8.91366608	0.768193
36	0.04943772	9.08571430	0.44917697		36.00000000	0.95388889	8.66676192	0.789578
37	0.05927483	9.08931540	0.53876766		37.00000000	0.92810811	8.43586732	0.810958
38	0.06940371	9.08025840	0.63020360		38.00000000	0.90368421	8.20568614	0.832311
39	0.07956682	9.08762650	0.72307355		39.00000000	0.88051282	8.00177164	0.853789
40	0.08938682	9.07547090	0.81122749		40.00000000	0.85850000	7.79129177	0.875161
41	0.09953653	9.09643460	0.90542754		41.00000000	0.83756098	7.61881864	0.896548
42	0.10934164	9.07543560	0.99232301		42.00000000	0.81761905	7.42024901	0.918034
43	0.11949880	9.09533980	1.08688219		43.00000000	0.79860465	7.26358067	0.939417
44	0.12933815	9.07878020	1.17423264		44.00000000	0.78045455	7.08557527	0.960771
45	0.13944693	9.07265850	1.26515437		45.00000000	0.76311111	6.92344651	0.982144
46	0.14930117	9.09014510	1.35716930		46.00000000	0.74652174	6.78599093	1.003635
47	0.15945013	9.08175370	1.44808681		47.00000000	0.73063830	6.63547707	1.025013
48	0.16958570	9.08666710	1.54096880		48.00000000	0.71541667	6.50075309	1.046369
49	0.17941464	9.08039380	1.62915558		49.00000000	0.70081633	6.36368823	1.067743
50	0.18955989	9.08163550	1.72151383		50.00000000	0.68680000	6.23726726	1.089221
51	0.19934490	9.08617970	1.81128358		51.00000000	0.67333333	6.11802766	1.110588
52	0.20952067	9.08580110	1.90366313		52.00000000	0.66038462	6.00012326	1.131945
53	0.21932802	9.07943440	1.99137437		53.00000000	0.64792453	5.88278825	1.153307
54	0.22947624	9.08735280	2.08533155		54.00000000	0.63592593	5.77888324	1.174781
55	0.23928432	9.08170890	2.17311054		55.00000000	0.62436364	5.67028879	1.196169
56	0.24944445	9.08487320	2.26617120		56.00000000	0.61321429	5.57097403	1.217515
57	0.25958896	9.08525660	2.35843231		57.00000000	0.60245614	5.47346863	1.238892
58	0.26939780	9.08137040	2.44650121		58.00000000	0.59206897	5.37679758	1.260384
59	0.27954081	9.07930370	2.53803591		59.00000000	0.58203390	5.28446253	1.281773
60	0.28937644	9.08012870	2.62757532		60.00000000	0.57233333	5.19686033	1.303137
61	0.29948744	9.09103110	2.72264963		61.00000000	0.56295082	5.11780341	1.324515
62	0.30934021	9.08230500	2.80952214		62.00000000	0.55387097	5.03042506	1.345997
63	0.31948248	9.08482460	2.90244229		63.00000000	0.54507937	4.95195042	1.367390
64	0.32926676	9.09126950	2.99345285		64.00000000	0.53656250	4.87803429	1.388753
65	0.33944178	9.08634660	3.08428566		65.00000000	0.52830769	4.80038680	1.410120
66	0.34923571	9.07654190	3.16985255		66.00000000	0.52030303	4.72255226	1.431591
67	0.35942265	9.08318230	3.26470145		67.00000000	0.51253731	4.65546985	1.452969
68	0.36955747	9.07406040	3.35338680		68.00000000	0.50500000	4.58240050	1.474349
69	0.37939236	9.09733770	3.45146042		69.00000000	0.49768116	4.52757357	1.495711
70	0.38954133	9.08587070	3.53932216		70.00000000	0.49057143	4.45726857	1.517185
71	0.39935315	9.08759780	3.62916081		71.00000000	0.48366197	4.39532547	1.538573
72	0.40949392	9.07667260	3.71684224		72.00000000	0.47694444	4.32906857	1.559963
73	0.41932210	9.07883640	3.80695674		73.00000000	0.47041096	4.27078414	1.581435
74	0.42950010	9.09412860	3.90592914		74.00000000	0.46405405	4.22016724	1.602820
75	0.43928736	9.06735320	3.98317365		75.00000000	0.45786667	4.15163879	1.624164
76	0.44942591	9.08995820	4.08526274		76.00000000	0.45184211	4.10722585	1.645529
77	0.45960242	9.07010360	4.16864156		77.00000000	0.44597403	4.04503062	1.667013
78	0.46944994	9.07278250	4.25921720		78.00000000	0.44025641	3.99435065	1.688394
79	0.47957584	9.06125550	4.34555922		79.00000000	0.43468354	3.93877866	1.709740
80	0.48940551	9.06170460	4.43484816		80.00000000	0.42925000	3.88973670	1.731122
81	0.49955299	9.04952530	4.52071742		81.00000000	0.42395062	3.83655184	1.752596
82	0.50932908	9.03317740	4.60085993		82.00000000	0.41878049	3.78291844	1.773982
83	0.51951528	9.00375940	4.67759059		83.00000000	0.41373494	3.72516985	1.795348
84	0.52928019	8.99097440	4.75874464		84.00000000	0.40880952	3.67559596	1.816723
85	0.53942394	8.94020840	4.82256244		85.00000000	0.40400000	3.61184419	1.838198
86	0.54958111	8.87136080	4.87553232		86.00000000	0.39930233	3.54235500	1.859566
87	0.55939066	8.79227350	4.91831568		87.00000000	0.39471264	3.47042152	1.880904
88	0.56952327	8.64574530	4.92395313		88.00000000	0.39022727	3.37380561	1.902282
89	0.57932168	8.46703820	4.90513879		89.00000000	0.38584270	3.26694485	1.923770
90	0.58944684	8.20464420	4.83620160		90.00000000	0.38155556	3.13052758	1.945149
91	0.59926462	7.85307070	4.70606743		91.00000000	0.37736264	2.96345547	1.966511
92	0.60936373	7.36543080	4.48822639		92.00000000	0.37326087	2.74922711	1.987994
93	0.61918968	6.74008270	4.17338965		93.00000000	0.36924731	2.48875742	2.009524
94	0.62926865	5.90526960	3.71600103		94.00000000	0.36531915	2.15730806	2.030929
95	0.63940275	4.80648610	3.07328043		95.00000000	0.36147368	1.73741824	2.052301
96	0.64916545	3.47766210	2.25757808		96.00000000	0.35770833	1.24398871	2.073659
97	0.65925634	1.76806030	1.16560496		97.00000000	0.35402062	0.62592980	2.095147
98	0.66899449	-0.26398441	-0.17660412		98.00000000	0.35040816	-0.09250229	2.116517
99	0.67907202	-2.79264070	-1.89640416		99.00000000	0.34686869	-0.96867961	2.137905
100	0.68878931	-5.72111610	-3.94064361		100.00000000	0.34340000	-1.96463127	2.159262
101	0.69909310	-9.29127120	-6.49546359		101.00000000	0.34000000	-3.15903221	2.180736
23:12 02/04/2018
Test Lot:	JK-PERC
Recipe:	Recipe_YJX-LID
Cell Name:	1-0-8h
Test Order:	6
Test Condition:	Light
1	-0.29987675	9.08920860	-2.72564234		1.00000000	34.34000000	312.12342332	0.000000
2	-0.28997833	9.07896330	-2.63270262		2.00000000	17.17000000	155.88579986	0.021629
3	-0.27985063	9.08666230	-2.54290817		3.00000000	11.44666667	104.01199446	0.043051
4	-0.27002591	9.08247180	-2.45250271		4.00000000	8.58500000	77.97302040	0.064407
5	-0.25987887	9.08989140	-2.36227071		5.00000000	6.86800000	62.42937414	0.085777
6	-0.24971101	9.07459830	-2.26602711		6.00000000	5.72333333	51.93695094	0.107266
7	-0.23990561	9.07844830	-2.17797068		7.00000000	4.90571429	44.53627352	0.128639
8	-0.22978762	9.07589630	-2.08552861		8.00000000	4.29250000	38.95828487	0.149977
9	-0.21991003	9.08150860	-1.99711483		9.00000000	3.81555556	34.65100059	0.171349
10	-0.20979574	9.08657840	-1.90632544		10.00000000	3.43400000	31.20331023	0.192834
11	-0.19997101	9.07123660	-1.81398434		11.00000000	3.12181818	28.31875135	0.214202
12	-0.18981802	9.09101100	-1.72563771		12.00000000	2.86166667	26.01544315	0.235557
13	-0.18002602	9.09257320	-1.63689976		13.00000000	2.64153846	24.01838182	0.256933
14	-0.16989464	9.06956480	-1.54087045		14.00000000	2.45285714	22.24634680	0.278410
15	-0.16007882	9.08424190	-1.45419472		15.00000000	2.28933333	20.79685779	0.299801
16	-0.14991319	9.06844520	-1.35947955		16.00000000	2.14625000	19.46315051	0.321143
17	-0.13979222	9.08593940	-1.27014364		17.00000000	2.02000000	18.35359759	0.342516
18	-0.12994960	9.06668950	-1.17821267		18.00000000	1.90777778	17.29722875	0.364000
19	-0.11982044	9.08352950	-1.08839250		19.00000000	1.80736842	16.41728437	0.385374
20	-0.11000686	9.07919220	-0.99877343		20.00000000	1.71700000	15.58897301	0.406738
21	-0.09983230	9.07847120	-0.90632462		21.00000000	1.63523810	14.84546195	0.428112
22	-0.09005072	9.08543400	-0.81814987		22.00000000	1.56090909	14.18153653	0.449588
23	-0.07989402	9.07257180	-0.72484424		23.00000000	1.49304348	13.54574416	0.470968
24	-0.07005290	9.09320740	-0.63700554		24.00000000	1.43083333	13.01086425	0.492314
25	-0.05992151	9.08938220	-0.54464948		25.00000000	1.37360000	12.48517539	0.513693
26	-0.04979011	9.07726000	-0.45195777		26.00000000	1.32076923	11.98896571	0.535165
27	-0.03996611	9.07001880	-0.36249337		27.00000000	1.27185185	11.53572021	0.556532
28	-0.02981983	9.09207920	-0.27112425		28.00000000	1.22642857	11.15078570	0.577907
29	-0.01996680	9.07982160	-0.18129500		29.00000000	1.18413793	10.75176116	0.599258
30	-0.00983987	9.08507630	-0.08939598		30.00000000	1.14466667	10.39938400	0.620737
31	-0.00065895	9.07894990	-0.00598253		31.00000000	1.10774194	10.05713353	0.642227
32	0.00950127	9.07934380	0.08626530		32.00000000	1.07312500	9.74327082	0.663632
33	0.01930415	9.08567430	0.17539123		33.00000000	1.04060606	9.45460774	0.685042
34	0.02947917	9.06842990	0.26732979		34.00000000	1.01000000	9.15911420	0.706506
35	0.03928354	9.08739090	0.35698488		35.00000000	0.98114286	8.91602867	0.727877
36	0.04942953	9.07998180	0.44881925		36.00000000	0.95388889	8.66129375	0.749235
37	0.05926888	9.08888630	0.53868812		37.00000000	0.92810811	8.43546907	0.770611
38	0.06943348	9.07445140	0.63007075		38.00000000	0.90368421	8.20043845	0.792104
39	0.07955714	9.08672240	0.72291367		39.00000000	0.88051282	8.00097557	0.813485
40	0.08937938	9.07525060	0.81114025		40.00000000	0.85850000	7.79110264	0.834850
41	0.09952612	9.08614640	0.90430885		41.00000000	0.83756098	7.61020164	0.856205
42	0.10933718	9.07118510	0.99181780		42.00000000	0.81761905	7.41677372	0.877680
43	0.11950327	9.08405690	1.08557450		43.00000000	0.79860465	7.25457009	0.899063
44	0.12932922	9.08441930	1.17488086		44.00000000	0.78045455	7.08997634	0.920448
45	0.13946331	9.07000350	1.26493271		45.00000000	0.76311111	6.92142045	0.941787
46	0.14929894	9.08724780	1.35671646		46.00000000	0.74652174	6.78382803	0.963247
47	0.15946130	9.07199760	1.44663253		47.00000000	0.73063830	6.62834888	0.984617
48	0.16958050	9.07917690	1.53965136		48.00000000	0.71541667	6.49539447	1.006010
49	0.17941166	9.08356950	1.62969828		49.00000000	0.70081633	6.36591381	1.027487
50	0.18954575	9.08042530	1.72115602		50.00000000	0.68680000	6.23643610	1.048875
51	0.19930099	9.06668950	1.80700019		51.00000000	0.67333333	6.10490426	1.070234
52	0.20948271	9.08119490	1.90235332		52.00000000	0.66038462	5.99708140	1.091613
53	0.21928187	9.06987190	1.98885847		53.00000000	0.64792453	5.87659247	1.113098
54	0.22941744	9.08284660	2.08376341		54.00000000	0.63592593	5.77601763	1.134487
55	0.23922554	9.07851310	2.17181220		55.00000000	0.62436364	5.66829345	1.155825
56	0.24938567	9.07639690	2.26352332		56.00000000	0.61321429	5.56577624	1.177200
57	0.25954208	9.08112340	2.35693366		57.00000000	0.60245614	5.47097855	1.198800
58	0.26936355	9.06851480	2.44272734		58.00000000	0.59206897	5.36918618	1.220202
59	0.27952594	9.07878020	2.53775457		59.00000000	0.58203390	5.28415783	1.241555
60	0.28933552	9.08214470	2.62778706		60.00000000	0.57233333	5.19801415	1.262946
61	0.29948449	9.07633690	2.71822213		61.00000000	0.56295082	5.10953130	1.284430
62	0.30928737	9.08235650	2.80905816		62.00000000	0.55387097	5.03045358	1.305825
63	0.31944600	9.07641510	2.89942450		63.00000000	0.54507937	4.94736658	1.327172
64	0.32927492	9.07585810	2.98845245		64.00000000	0.53656250	4.86976511	1.348550
65	0.33942315	9.06895920	3.07821470		65.00000000	0.52830769	4.79120091	1.370031
66	0.34926474	9.07768540	3.17051543		66.00000000	0.52030303	4.72314722	1.391416
67	0.35938469	9.07886030	3.26280339		67.00000000	0.51253731	4.65325467	1.412780
68	0.36954629	9.07304570	3.35291038		68.00000000	0.50500000	4.58188808	1.434162
69	0.37939459	9.07417770	3.44269393		69.00000000	0.49768116	4.51604728	1.455642
70	0.38953835	9.07729630	3.53595502		70.00000000	0.49057143	4.45306221	1.477011
71	0.39936504	9.07982160	3.62616332		71.00000000	0.48366197	4.39156442	1.498391
72	0.40949988	9.07588480	3.71657374		72.00000000	0.47694444	4.32869283	1.519759
73	0.41933104	9.07520010	3.80551310		73.00000000	0.47041096	4.26907358	1.541239
74	0.42947337	9.07913590	3.89924709		74.00000000	0.46405405	4.21320982	1.562631
75	0.43927419	9.06676480	3.98279576		75.00000000	0.45786667	4.15136938	1.624343
76	0.44944420	9.07229900	4.07749217		76.00000000	0.45184211	4.09924668	1.645718
77	0.45957550	9.06595420	4.16649043		77.00000000	0.44597403	4.04318009	1.667113
78	0.46944779	9.06349950	4.25483981		78.00000000	0.44025641	3.99026375	1.688463
79	0.47960517	9.06051350	4.34546912		79.00000000	0.43468354	3.93845612	1.709934
80	0.48940897	9.05625530	4.43221258		80.00000000	0.42925000	3.88739759	1.731311
81	0.49954250	9.03137300	4.51155465		81.00000000	0.42395062	3.82885616	1.752702
82	0.50939769	9.02165890	4.59561220		82.00000000	0.41878049	3.77809471	1.774175
83	0.51952076	9.00447370	4.67801102		83.00000000	0.41373494	3.72546538	1.795572
84	0.52927846	8.98019220	4.75302230		84.00000000	0.40880952	3.67118810	1.816908
85	0.53940529	8.92489810	4.81413725		85.00000000	0.40400000	3.60565883	1.838277
86	0.54953808	8.85373500	4.86546453		86.00000000	0.39930233	3.53531698	1.859758
87	0.55936867	8.77884770	4.91061236		87.00000000	0.39471264	3.46512218	1.881129
88	0.56948435	8.63052750	4.91495034		88.00000000	0.39022727	3.36786721	1.902482
89	0.57929564	8.45089720	4.89556790		89.00000000	0.38584270	3.26071696	1.923880
90	0.58941203	8.19074340	4.82772269		90.00000000	0.38155556	3.12522365	1.945355
91	0.59921807	7.84046980	4.69815118		91.00000000	0.37736264	2.95870036	1.966739
92	0.60936356	7.34145500	4.47361515		92.00000000	0.37326087	2.74027788	1.988217
93	0.61916882	6.73212670	4.16832294		93.00000000	0.36924731	2.48581969	2.009667
94	0.62928081	5.88025620	3.70033238		94.00000000	0.36531915	2.14817019	2.031158
95	0.63941211	4.79720540	3.06739123		95.00000000	0.36147368	1.73406351	2.052533
96	0.64918238	3.48734260	2.26392137		96.00000000	0.35770833	1.24745151	2.073875
97	0.65923852	1.76462810	1.16331082		97.00000000	0.35402062	0.62471473	2.095251
98	0.66901630	-0.21718307	-0.14529901		98.00000000	0.35040816	-0.07610272	2.116746
99	0.67908955	-2.70775530	-1.83880833		99.00000000	0.34686869	-0.93923553	2.138119
100	0.68879360	-5.53975960	-3.81575096		100.00000000	0.34340000	-1.90235345	2.159489
101	0.69905889	-9.02244380	-6.30721955		101.00000000	0.34000000	-3.06763089	2.180864
23:12 02/04/2018
Test Lot:	JK-PERC
Recipe:	Recipe_YJX-LID
Cell Name:	1-0-8h
Test Order:	7
Test Condition:	Light
1	-0.29981190	9.07720570	-2.72145429		1.00000000	34.34000000	311.71124374	0.000000
2	-0.29001528	9.07821370	-2.63282069		2.00000000	17.17000000	155.87292923	0.061756
3	-0.27985170	9.08352380	-2.54203958		3.00000000	11.44666667	103.97606910	0.083206
4	-0.27009526	9.08372400	-2.45347080		4.00000000	8.58500000	77.98377054	0.104679
5	-0.25987810	9.07726570	-2.35898256		5.00000000	6.86800000	62.34266083	0.126050
6	-0.24969964	9.08173370	-2.26770564		6.00000000	5.72333333	51.97778921	0.147444
7	-0.23989929	9.07327080	-2.17667122		7.00000000	4.90571429	44.51087418	0.168938
8	-0.22974391	9.08274650	-2.08670569		8.00000000	4.29250000	38.98768935	0.190400
9	-0.21991378	9.08082200	-1.99699789		9.00000000	3.81555556	34.64838083	0.211780
10	-0.20979710	9.08543300	-1.90609750		10.00000000	3.43400000	31.19937692	0.233161
11	-0.19996996	9.07044700	-1.81381692		11.00000000	3.12181818	28.31628636	0.254642
12	-0.18984807	9.08094880	-1.72400060		12.00000000	2.86166667	25.98664848	0.276020
13	-0.18003283	9.08502770	-1.63560325		13.00000000	2.64153846	23.99845009	0.297357
14	-0.16988936	9.08436200	-1.54333645		14.00000000	2.45285714	22.28264222	0.318734
15	-0.16007710	9.08054160	-1.45358677		15.00000000	2.28933333	20.78838657	0.340220
16	-0.14993735	9.08677670	-1.36244722		16.00000000	2.14625000	19.50249449	0.361599
17	-0.13981397	9.07939340	-1.26942604		17.00000000	2.02000000	18.34037467	0.382961
18	-0.12996821	9.07875250	-1.17994921		18.00000000	1.90777778	17.32024227	0.404334
19	-0.11982102	9.09474180	-1.08974124		19.00000000	1.80736842	16.43754913	0.425808
20	-0.11002439	9.07234290	-0.99817899		20.00000000	1.71700000	15.57721276	0.447200
21	-0.09985859	9.08626940	-0.90734204		21.00000000	1.63523810	14.85821387	0.468552
22	-0.09002772	9.07338910	-0.81685653		22.00000000	1.56090909	14.16273553	0.489926
23	-0.07989839	9.07697200	-0.72523542		23.00000000	1.49304348	13.55231385	0.511413
24	-0.07005040	9.08300970	-0.63626849		24.00000000	1.43083333	12.99627305	0.532787
25	-0.05992256	9.08302020	-0.54427780		25.00000000	1.37360000	12.47643655	0.554143
26	-0.04975824	9.08057210	-0.45183329		26.00000000	1.32076923	11.99334023	0.575519
27	-0.03995343	9.08105950	-0.36281944		27.00000000	1.27185185	11.54976234	0.597024
28	-0.02979432	9.08158490	-0.27057965		28.00000000	1.22642857	11.13791520	0.618413
29	-0.01999769	9.07086280	-0.18139634		29.00000000	1.18413793	10.74115271	0.639759
30	-0.00984082	9.09385200	-0.08949095		30.00000000	1.14466667	10.40942926	0.661127
31	-0.00062103	9.07102780	-0.00563341		31.00000000	1.10774194	10.04835789	0.682716
32	0.00951926	9.08492570	0.08648174		32.00000000	1.07312500	9.74926089	0.704102
33	0.01933942	9.08789630	0.17575466		33.00000000	1.04060606	9.45691997	0.725514
34	0.02948931	9.08129600	0.26780113		34.00000000	1.01000000	9.17210896	0.746888
35	0.03930798	9.07559680	0.35674340		35.00000000	0.98114286	8.90445697	0.768364
36	0.04944745	9.08249760	0.44910636		36.00000000	0.95388889	8.66369354	0.789741
37	0.05927059	9.07575040	0.53792509		37.00000000	0.92810811	8.42327753	0.811130
38	0.06941601	9.07620140	0.63003368		38.00000000	0.90368421	8.20201990	0.832469
39	0.07954506	9.07899000	0.72218879		39.00000000	0.88051282	7.99416709	0.853948
40	0.08941658	9.07022190	0.81102820		40.00000000	0.85850000	7.78678550	0.875329
41	0.09954711	9.08702660	0.90458724		41.00000000	0.83756098	7.61093886	0.896709
42	0.10936727	9.07768340	0.99280145		42.00000000	0.81761905	7.42208686	0.918204
43	0.11951940	9.07009320	1.08405210		43.00000000	0.79860465	7.24341862	0.939580
44	0.12934105	9.10219760	1.17728779		44.00000000	0.78045455	7.10385149	0.960936
45	0.13946563	9.06922250	1.26484483		45.00000000	0.76311111	6.92082446	0.982325
46	0.14929397	9.07956220	1.35552389		46.00000000	0.74652174	6.77809056	1.003792
47	0.15944313	9.07741260	1.44733108		47.00000000	0.73063830	6.63230529	1.025172
48	0.16958036	9.07789990	1.53943353		48.00000000	0.71541667	6.49448089	1.046530
49	0.17938936	9.07370000	1.62772524		49.00000000	0.70081633	6.35899710	1.067906
50	0.18953700	9.07010650	1.71912078		50.00000000	0.68680000	6.22934914	1.089375
51	0.19934675	9.07940670	1.80995022		51.00000000	0.67333333	6.11346718	1.110764
52	0.20949069	9.07883450	1.90193130		52.00000000	0.66038462	5.99552263	1.132121
53	0.21929745	9.08778760	1.99292865		53.00000000	0.64792453	5.88820049	1.153493
54	0.22946222	9.07542040	2.08246611		54.00000000	0.63592593	5.77129512	1.174984
55	0.23927122	9.07890610	2.17232094		55.00000000	0.62436364	5.66853883	1.196371
56	0.24940176	9.07621290	2.26362347		56.00000000	0.61321429	5.56566341	1.217720
57	0.25955090	9.08299160	2.35749864		57.00000000	0.60245614	5.47210406	1.239104
58	0.26938522	9.07712270	2.44524270		58.00000000	0.59206897	5.37428265	1.260586
59	0.27955073	9.08397290	2.53943126		59.00000000	0.58203390	5.28718016	1.281970
60	0.28935450	9.06620980	2.62334860		60.00000000	0.57233333	5.18889408	1.303307
61	0.29950738	9.08535960	2.72113225		61.00000000	0.56295082	5.11461063	1.324675
62	0.30931190	9.08080860	2.80880216		62.00000000	0.55387097	5.02959625	1.346158
63	0.31948188	9.07235810	2.89845402		63.00000000	0.54507937	4.94515519	1.367541
64	0.32931098	9.07836720	2.98960600		64.00000000	0.53656250	4.87111140	1.388906
65	0.33944374	9.07295510	3.07975781		65.00000000	0.52830769	4.79331197	1.410277
66	0.34926689	9.08346750	3.17255444		66.00000000	0.52030303	4.72615567	1.431747
67	0.35943538	9.07710930	3.26263423		67.00000000	0.51253731	4.65235721	1.453124
68	0.36957932	9.08622070	3.35807927		68.00000000	0.50500000	4.58854145	1.474511
69	0.37938312	9.07820890	3.44411922		69.00000000	0.49768116	4.51805353	1.495858
70	0.38952184	9.08074190	3.53714729		70.00000000	0.49057143	4.45475253	1.517324
71	0.39936879	9.07258800	3.62330849		71.00000000	0.48366197	4.38806580	1.538698
72	0.40952313	9.07068730	3.71465625		72.00000000	0.47694444	4.32621392	1.560081
73	0.41931576	9.07668210	3.80599585		73.00000000	0.47041096	4.26977073	1.581559
74	0.42947757	9.06834320	3.89465000		74.00000000	0.46405405	4.20820143	1.602943
75	0.43930146	9.07507800	3.98669502		75.00000000	0.45786667	4.15517571	1.624285
76	0.44946623	9.06539540	4.07458909		76.00000000	0.45184211	4.09612734	1.645667
77	0.45960122	9.07488820	4.17082969		77.00000000	0.44597403	4.04716443	1.667150
78	0.46946084	9.05513570	4.25103161		78.00000000	0.44025641	3.98658154	1.688533
79	0.47959808	9.06724830	4.34863488		79.00000000	0.43468354	3.94138363	1.709895
80	0.48937804	9.04953190	4.42864218		80.00000000	0.42925000	3.88451157	1.731274
81	0.49953759	9.03906820	4.51535434		81.00000000	0.42395062	3.83211854	1.752754
82	0.50934064	9.03293900	4.60084293		82.00000000	0.41878049	3.78281860	1.774140
83	0.51951957	9.00082300	4.67610369		83.00000000	0.41373494	3.72395496	1.795491
84	0.52927202	8.98113730	4.75346468		84.00000000	0.40880952	3.67157446	1.816873
85	0.53941071	8.92061610	4.81187586		85.00000000	0.40400000	3.60392890	1.838355
86	0.54953974	8.85478880	4.86605833		86.00000000	0.39930233	3.53573776	1.859739
87	0.55937260	8.76960750	4.90547815		87.00000000	0.39471264	3.46147496	1.881096
88	0.56947780	8.62094970	4.90943947		88.00000000	0.39022727	3.36412969	1.902471
89	0.57932031	8.44596670	4.89292005		89.00000000	0.38584270	3.25881457	1.923948
90	0.58945900	8.18849950	4.82678473		90.00000000	0.38155556	3.12436748	1.945342
91	0.59921741	7.82963900	4.69165600		91.00000000	0.37736264	2.95461322	1.966691
92	0.60933900	7.34606790	4.47624567		92.00000000	0.37326087	2.74199969	1.988164
93	0.61915994	6.71715690	4.15899446		93.00000000	0.36924731	2.48029213	2.009662
94	0.62926441	5.88545420	3.70350686		94.00000000	0.36531915	2.15006912	2.031040
95	0.63937485	4.80477000	3.07204910		95.00000000	0.36147368	1.73679791	2.052395
96	0.64920318	3.48082330	2.25976156		96.00000000	0.35770833	1.24511950	2.073764
97	0.65933746	1.77917540	1.17307699		97.00000000	0.35402062	0.62986478	2.095235
98	0.66901398	-0.21512620	-0.14392244		98.00000000	0.35040816	-0.07538198	2.116623
99	0.67910951	-2.69552140	-1.83055422		99.00000000	0.34686869	-0.93499197	2.138009
100	0.68882173	-5.53741880	-3.81429440		100.00000000	0.34340000	-1.90154962	2.159348
101	0.69914508	-9.04215530	-6.32177839		101.00000000	0.34000000	-3.07433280	2.180815
23:34 02/04/2018
Test Lot:	JK-PERC
Recipe:	Recipe_YJX-LID
Cell Name:	1-0-8h
Test Order:	8
Test Condition:	Light
1	-0.29981571	9.05290410	-2.71420287		1.00000000	34.34000000	310.87672679	0.000000
2	-0.29005858	9.04771230	-2.62436658		2.00000000	17.17000000	155.34922019	0.061808
3	-0.27993524	9.05587960	-2.53505983		3.00000000	11.44666667	103.65963515	0.083226
4	-0.27010590	9.05852790	-2.44676183		4.00000000	8.58500000	77.76746202	0.104714
5	-0.25991783	9.06107620	-2.35513526		5.00000000	6.86800000	62.23147134	0.126082
6	-0.24976769	9.05736450	-2.26223701		6.00000000	5.72333333	51.83831616	0.147418
7	-0.23998302	9.06799980	-2.17616598		7.00000000	4.90571429	44.48501616	0.168792
8	-0.22980164	9.05696770	-2.08130603		8.00000000	4.29250000	38.87703385	0.190282
9	-0.22001101	9.06399630	-1.99417898		9.00000000	3.81555556	34.58418144	0.211661
10	-0.20988023	9.05749610	-1.90098936		10.00000000	3.43400000	31.10344161	0.233018
11	-0.20002411	9.06205560	-1.81262961		11.00000000	3.12181818	28.29008994	0.254387
12	-0.18987174	9.05958080	-1.72015837		12.00000000	2.86166667	25.92550039	0.275882
13	-0.18012057	9.05418870	-1.63084563		13.00000000	2.64153846	23.91698769	0.297272
14	-0.16997193	9.06327720	-1.54050272		14.00000000	2.45285714	22.23092422	0.318617
15	-0.16013515	9.06333920	-1.45135918		15.00000000	2.28933333	20.74900454	0.339991
16	-0.14997832	9.06457230	-1.35948933		16.00000000	2.14625000	19.45483830	0.361480
17	-0.13984160	9.04508690	-1.26487942		17.00000000	2.02000000	18.27107554	0.382848
18	-0.13003758	9.06716540	-1.17907225		18.00000000	1.90777778	17.29813666	0.404185
19	-0.11992838	9.05051040	-1.08541305		19.00000000	1.80736842	16.35760669	0.425562
20	-0.11007151	9.04907420	-0.99604526		20.00000000	1.71700000	15.53726040	0.447036
21	-0.09990054	9.06095220	-0.90519405		21.00000000	1.63523810	14.81681422	0.468426
22	-0.09006526	9.05442430	-0.81548904		22.00000000	1.56090909	14.13313320	0.489817
23	-0.07993969	9.06742570	-0.72484716		23.00000000	1.49304348	13.53806081	0.511155
24	-0.07010515	9.05080600	-0.63450811		24.00000000	1.43083333	12.95019492	0.532621
25	-0.05998256	9.04985330	-0.54283338		25.00000000	1.37360000	12.43087849	0.554004
26	-0.04982276	9.04722310	-0.45075758		26.00000000	1.32076923	11.94929389	0.575392
27	-0.04008274	9.05881500	-0.36310214		27.00000000	1.27185185	11.52147063	0.596844
28	-0.02984255	9.05159570	-0.27012272		28.00000000	1.22642857	11.10113558	0.618297
29	-0.02003853	9.05456920	-0.18144023		29.00000000	1.18413793	10.72185884	0.639667
30	-0.00993306	9.06017300	-0.08999522		30.00000000	1.14466667	10.37087803	0.661053
31	-0.00066270	9.06098750	-0.00600473		31.00000000	1.10774194	10.03723583	0.682518
32	0.00944033	9.05884170	0.08551845		32.00000000	1.07312500	9.72126950	0.704001
33	0.01929096	9.06143000	0.17480371		33.00000000	1.04060606	9.42937898	0.725370
34	0.02942592	9.05387690	0.26641863		34.00000000	1.01000000	9.14441567	0.746734
35	0.03920808	9.05044360	0.35485049		35.00000000	0.98114286	8.87977809	0.768109
36	0.04939141	9.06261630	0.44761538		36.00000000	0.95388889	8.64472899	0.789574
37	0.05918697	9.05279540	0.53580752		37.00000000	0.92810811	8.40197281	0.810956
38	0.06931596	9.06013490	0.62801197		38.00000000	0.90368421	8.18750085	0.832339
39	0.07950302	9.05387970	0.71981080		39.00000000	0.88051282	7.97205715	0.853691
40	0.08934993	9.05471610	0.80903828		40.00000000	0.85850000	7.77347377	0.875163
41	0.09949680	9.06300350	0.90173982		41.00000000	0.83756098	7.59081805	0.896536
42	0.10927672	9.05315110	0.98929866		42.00000000	0.81761905	7.40202878	0.917929
43	0.11946526	9.05376340	1.08161020		43.00000000	0.79860465	7.23037756	0.939414
44	0.12924892	9.05738450	1.17065716		44.00000000	0.78045455	7.06887690	0.960816
45	0.13940991	9.05921550	1.26294442		45.00000000	0.76311111	6.91318801	0.982168
46	0.14916825	9.05568410	1.35082055		46.00000000	0.74652174	6.76026504	1.003543
47	0.15934935	9.05828380	1.44343164		47.00000000	0.73063830	6.61832906	1.025032
48	0.16954237	9.04759030	1.53394990		48.00000000	0.71541667	6.47279689	1.046442
49	0.17929029	9.05643840	1.62373147		49.00000000	0.70081633	6.34689989	1.067810
50	0.18950562	9.05673410	1.71630201		50.00000000	0.68680000	6.22016498	1.089186
51	0.19924313	9.05187610	1.80352413		51.00000000	0.67333333	6.09492991	1.110656
52	0.20940116	9.06798170	1.89884589		52.00000000	0.66038462	5.98835561	1.132033
53	0.21918778	9.04815770	1.98324560		53.00000000	0.64792453	5.86252331	1.153367
54	0.22941279	9.04911900	2.07598364		54.00000000	0.63592593	5.75456938	1.174739
55	0.23922175	9.04441260	2.16362021		55.00000000	0.62436364	5.64700234	1.196218
56	0.24934256	9.06005290	2.25905678		56.00000000	0.61321429	5.55575387	1.217592
57	0.25946561	9.05893140	2.35048116		57.00000000	0.60245614	5.45760885	1.238935
58	0.26931030	9.05019380	2.43731041		58.00000000	0.59206897	5.35833888	1.260321
59	0.27945566	9.06130310	2.53223244		59.00000000	0.58203390	5.27398557	1.281804
60	0.28930035	9.04274940	2.61607057		60.00000000	0.57233333	5.17546691	1.303201
61	0.29945463	9.05603980	2.71187305		61.00000000	0.56295082	5.09810503	1.324546
62	0.30921820	9.05951400	2.80136661		62.00000000	0.55387097	5.01780179	1.345914
63	0.31942609	9.05796050	2.89334891		63.00000000	0.54507937	4.93730736	1.367385
64	0.32919335	9.05315400	2.98023809		64.00000000	0.53656250	4.85758294	1.388805
65	0.33941615	9.04746340	3.07085519		65.00000000	0.52830769	4.77984451	1.410177
66	0.34918490	9.04938130	3.15990730		66.00000000	0.52030303	4.70842051	1.431560
67	0.35934368	9.04274750	3.24945416		67.00000000	0.51253731	4.63474551	1.453045
68	0.36947641	9.05302430	3.34487892		68.00000000	0.50500000	4.57177727	1.474422
69	0.37933001	9.05771640	3.43586365		69.00000000	0.49768116	4.50785480	1.495812
70	0.38950217	9.04060650	3.52133585		70.00000000	0.49057143	4.43506325	1.517171
71	0.39932528	9.05169390	3.61457020		71.00000000	0.48366197	4.37796012	1.538643
72	0.40947437	9.03839870	3.70099261		72.00000000	0.47694444	4.31081405	1.560027
73	0.41930938	9.04414560	3.79229508		73.00000000	0.47041096	4.25446520	1.581408
74	0.42939669	9.03808780	3.88092499		74.00000000	0.46405405	4.19416128	1.602890
75	0.43923914	9.03423980	3.96819172		75.00000000	0.45786667	4.13647726	1.624266
76	0.44940534	9.03154660	4.05882527		76.00000000	0.45184211	4.08083303	1.645613
77	0.45952320	9.02433870	4.14689300		77.00000000	0.44597403	4.02462066	1.666983
78	0.46935076	9.01318740	4.23034636		78.00000000	0.44025641	3.96811353	1.688462
79	0.47954896	9.00694660	4.31927187		79.00000000	0.43468354	3.91517147	1.709838
80	0.48931774	8.99958040	4.40365434		80.00000000	0.42925000	3.86306989	1.731191
81	0.49947056	8.97401910	4.48225835		81.00000000	0.42395062	3.80454094	1.752572
82	0.50927800	8.95719240	4.56170103		82.00000000	0.41878049	3.75109740	1.774056
83	0.51945984	8.93194480	4.63978662		83.00000000	0.41373494	3.69545764	1.795451
84	0.52917355	8.87622260	4.69706222		84.00000000	0.40880952	3.62868433	1.816811
85	0.53935689	8.82450770	4.75955903		85.00000000	0.40400000	3.56510111	1.838186
86	0.54947245	8.75754170	4.81202789		86.00000000	0.39930233	3.49690677	1.859669
87	0.55928886	8.65233710	4.83915575		87.00000000	0.39471264	3.41518685	1.881031
88	0.56944466	8.51245400	4.84737147		88.00000000	0.39022727	3.32179171	1.902363
89	0.57924765	8.31544780	4.81670360		89.00000000	0.38584270	3.20845480	1.923742
90	0.58934468	8.03584770	4.73588409		90.00000000	0.38155556	3.06612233	1.945217
91	0.59916031	7.67779020	4.60022716		91.00000000	0.37736264	2.89731116	1.966605
92	0.60929078	7.18189140	4.37586021		92.00000000	0.37326087	2.68071903	1.988072
93	0.61904395	6.56010340	4.06099232		93.00000000	0.36924731	2.42230055	2.009475
94	0.62915510	5.68685910	3.57791641		94.00000000	0.36531915	2.07751853	2.030998
95	0.63938528	4.60519790	2.94449575		95.00000000	0.36147368	1.66465785	2.052387
96	0.64904541	3.26652740	2.12012462		96.00000000	0.35770833	1.16846407	2.073754
97	0.65915948	1.57122150	1.03568555		97.00000000	0.35402062	0.55624481	2.095132
98	0.66895509	-0.41959611	-0.28069095		98.00000000	0.35040816	-0.14702990	2.116616
99	0.67903793	-2.84792450	-1.93384876		99.00000000	0.34686869	-0.98785583	2.138008
100	0.68878883	-5.64731500	-3.88980749		100.00000000	0.34340000	-1.93928797	2.159405
101	0.69903988	-9.01801970	-6.30395541		101.00000000	0.34000000	-3.06612670	2.180773
