# Supplementary material for: Study on the Electrical Injection Regeneration of Industrialized B-Doped Czochralski Silicon PERC Solar Cells
Source: Hindawi journal article supplement (doi:10.1155/2019/5357370), 2019-06-20
Supplement: f1 [file 5357370.f1.zip › section3.2/IVRawData_1-0-10min.csv]

12:19 02/04/2018
Test Lot:	JK-PERC
Recipe:	Recipe_YJX-LID
Cell Name:	1-0-10min
Test Order:	2
Test Condition:	Light
1	-0.29991367	8.84288980	-2.65210353		1.00000000	34.34000000	303.66483573	0.000000
2	-0.29009050	8.84771630	-2.56663845		2.00000000	17.17000000	151.91528887	0.061732
3	-0.27996290	8.85658650	-2.47951564		3.00000000	11.44666667	101.37839347	0.083250
4	-0.27011368	8.83332350	-2.38600152		4.00000000	8.58500000	75.83408225	0.104634
5	-0.25995782	8.85798170	-2.30270161		5.00000000	6.86800000	60.83661832	0.125983
6	-0.24982874	8.84300330	-2.20923637		6.00000000	5.72333333	50.61145555	0.147367
7	-0.24001300	8.84466740	-2.12283516		7.00000000	4.90571429	43.38941122	0.168867
8	-0.22984746	8.85522270	-2.03535045		8.00000000	4.29250000	38.01104344	0.190302
9	-0.22002131	8.83952050	-1.94488288		9.00000000	3.81555556	33.72768155	0.211669
10	-0.20988850	8.84542940	-1.85655391		10.00000000	3.43400000	30.37520456	0.233058
11	-0.20003556	8.85479070	-1.77127302		11.00000000	3.12181818	27.64304660	0.254529
12	-0.18988341	8.84782790	-1.68005573		12.00000000	2.86166667	25.31953417	0.275900
13	-0.18013690	8.83976550	-1.59236795		13.00000000	2.64153846	23.35058056	0.297241
14	-0.16996466	8.85225390	-1.50457032		14.00000000	2.45285714	21.71331421	0.318620
15	-0.16015413	8.84137920	-1.41598339		15.00000000	2.28933333	20.24086412	0.340084
16	-0.15000495	8.85325810	-1.32803254		16.00000000	2.14625000	19.00130520	0.361459
17	-0.13986173	8.83806320	-1.23610681		17.00000000	2.02000000	17.85288766	0.382822
18	-0.13002591	8.85854340	-1.15184017		18.00000000	1.90777778	16.90013224	0.404199
19	-0.11988269	8.84659290	-1.06055335		19.00000000	1.80736842	15.98905264	0.425677
20	-0.11007068	8.84395120	-0.97345972		20.00000000	1.71700000	15.18506421	0.447062
21	-0.09990811	8.84745220	-0.88393219		21.00000000	1.63523810	14.46769088	0.468401
22	-0.09006930	8.85089400	-0.79719384		22.00000000	1.56090909	13.81544091	0.489824
23	-0.07993576	8.84774300	-0.70725105		23.00000000	1.49304348	13.21006498	0.511300
24	-0.07013343	8.84428980	-0.62028034		24.00000000	1.43083333	12.65470466	0.532671
25	-0.06001105	8.84624390	-0.53087237		25.00000000	1.37360000	12.15120062	0.554059
26	-0.04982168	8.84142780	-0.44049480		26.00000000	1.32076923	11.67748579	0.575403
27	-0.04001563	8.84906100	-0.35410072		27.00000000	1.27185185	11.25469462	0.596889
28	-0.02984561	8.84933660	-0.26411387		28.00000000	1.22642857	10.85307924	0.618274
29	-0.02006040	8.84320160	-0.17739813		29.00000000	1.18413793	10.47157045	0.639658
30	-0.00992239	8.84306140	-0.08774428		30.00000000	1.14466667	10.12235762	0.661142
31	-0.00065073	8.84480380	-0.00575561		31.00000000	1.10774194	9.79776008	0.682719
32	0.00948335	8.84065150	0.08383896		32.00000000	1.07312500	9.48712414	0.704104
33	0.01927647	8.85480020	0.17068929		33.00000000	1.04060606	9.21435875	0.725490
34	0.02944768	8.83906270	0.26028991		34.00000000	1.01000000	8.92745333	0.746853
35	0.03928174	8.85639100	0.34789446		35.00000000	0.98114286	8.68938477	0.768345
36	0.04940978	8.83777810	0.43667271		36.00000000	0.95388889	8.43025833	0.789727
37	0.05924980	8.85130790	0.52443822		37.00000000	0.92810811	8.21497063	0.811104
38	0.06940240	8.84035970	0.61354222		38.00000000	0.90368421	7.98889348	0.832522
39	0.07953566	8.85422130	0.70422630		39.00000000	0.88051282	7.79625537	0.854000
40	0.08935409	8.84863760	0.79066196		40.00000000	0.85850000	7.59655538	0.875374
41	0.09952902	8.84780310	0.88061317		41.00000000	0.83756098	7.41057460	0.896754
42	0.10934373	8.83806800	0.96638732		42.00000000	0.81761905	7.22617274	0.918110
43	0.11950080	8.83848570	1.05620611		43.00000000	0.79860465	7.05845579	0.939588
44	0.12930806	8.84597680	1.14385610		44.00000000	0.78045455	6.90388280	0.960966
45	0.13945472	8.84812160	1.23391232		45.00000000	0.76311111	6.75209991	0.982355
46	0.14928059	8.85140420	1.32134284		46.00000000	0.74652174	6.60776566	1.003847
47	0.15943320	8.84352210	1.40995103		47.00000000	0.73063830	6.46141593	1.025231
48	0.16955529	8.84530640	1.49976849		48.00000000	0.71541667	6.32807962	1.046594
49	0.17938487	8.84225750	1.58616721		49.00000000	0.70081633	6.19679842	1.067971
50	0.18955311	8.83961680	1.67557686		50.00000000	0.68680000	6.07104882	1.089428
51	0.19929339	8.84141450	1.76203547		51.00000000	0.67333333	5.95321910	1.110822
52	0.20945865	8.84716510	1.85311526		52.00000000	0.66038462	5.84253172	1.132170
53	0.21926740	8.83617120	1.93748428		53.00000000	0.64792453	5.72517206	1.153549
54	0.22942895	8.84549810	2.02941334		54.00000000	0.63592593	5.62508157	1.175033
55	0.23926151	8.84075550	2.11525251		55.00000000	0.62436364	5.51984625	1.196405
56	0.24939848	8.84811310	2.20670596		56.00000000	0.61321429	5.42578935	1.217763
57	0.25952208	8.84466550	2.29538599		57.00000000	0.60245614	5.32852304	1.239133
58	0.26936951	8.84327510	2.38210868		58.00000000	0.59206897	5.23582874	1.260610
59	0.27949607	8.83851910	2.47033135		59.00000000	0.58203390	5.14431773	1.281992
60	0.28932938	8.84909150	2.56030216		60.00000000	0.57233333	5.06463004	1.303335
61	0.29948348	8.84037300	2.64754567		61.00000000	0.56295082	4.97669523	1.324710
62	0.30929446	8.84651090	2.73617681		62.00000000	0.55387097	4.89982555	1.346194
63	0.31942400	8.84161280	2.82422333		63.00000000	0.54507937	4.81938069	1.367579
64	0.32926923	8.85475350	2.91559787		64.00000000	0.53656250	4.75112867	1.388929
65	0.33941364	8.84003930	3.00042992		65.00000000	0.52830769	4.67026076	1.410315
66	0.34922537	8.84295850	3.08818545		66.00000000	0.52030303	4.60101810	1.431804
67	0.35940775	8.84209350	3.17791693		67.00000000	0.51253731	4.53190285	1.453189
68	0.36953133	8.83336730	3.26420597		68.00000000	0.50500000	4.46085049	1.474557
69	0.37934381	8.83656500	3.35209623		69.00000000	0.49768116	4.39779191	1.495926
70	0.38948375	8.84300800	3.44420792		70.00000000	0.49057143	4.33812707	1.517402
71	0.39933866	8.84527780	3.53226138		71.00000000	0.48366197	4.27812450	1.538789
72	0.40948084	8.83364580	3.61720870		72.00000000	0.47694444	4.21315829	1.560167
73	0.41927844	8.84505750	3.70854191		73.00000000	0.47041096	4.16081198	1.581534
74	0.42944816	8.82906340	3.79162503		74.00000000	0.46405405	4.09716266	1.603013
75	0.43928519	8.84052180	3.88351030		75.00000000	0.45786667	4.04778025	1.624395
76	0.44945788	8.82096770	3.96465344		76.00000000	0.45184211	3.98568462	1.645789
77	0.45957997	8.83018110	4.05817437		77.00000000	0.44597403	3.93803142	1.667272
78	0.46943638	8.81396290	4.13759484		78.00000000	0.44025641	3.88040367	1.688650
79	0.47956219	8.80946540	4.22468652		79.00000000	0.43468354	3.82932964	1.710017
80	0.48936722	8.79181390	4.30242553		80.00000000	0.42925000	3.77388612	1.731396
81	0.49951982	8.76650240	4.37904170		81.00000000	0.42395062	3.71656410	1.752879
82	0.50934345	8.74208830	4.45272541		82.00000000	0.41878049	3.66101600	1.774254
83	0.51944768	8.69082070	4.51442665		83.00000000	0.41373494	3.59569618	1.795597
84	0.52925646	8.62553220	4.56511864		84.00000000	0.40880952	3.52619971	1.816978
85	0.53938746	8.52839280	4.60010813		85.00000000	0.40400000	3.44547069	1.838457
86	0.54952073	8.39530470	4.61339397		86.00000000	0.39930233	3.35226469	1.859834
87	0.55934811	8.19808580	4.58558380		87.00000000	0.39471264	3.23588812	1.881186
88	0.56947535	7.94100950	4.52220916		88.00000000	0.39022727	3.09879848	1.902560
89	0.57925212	7.57433320	4.38744856		89.00000000	0.38584270	2.92250115	1.924054
90	0.58935338	7.07300570	4.16849982		90.00000000	0.38155556	2.69874462	1.945452
91	0.59916884	6.40126560	3.83543888		91.00000000	0.37736264	2.41559847	1.966796
92	0.60927230	5.54344270	3.37746608		92.00000000	0.37326087	2.06915024	1.988275
93	0.61909449	4.45086810	2.75550792		93.00000000	0.36924731	1.64347108	2.009781
94	0.62917858	3.05358410	1.92124971		94.00000000	0.36531915	1.11553274	2.031169
95	0.63928878	1.37910010	0.88164322		95.00000000	0.36147368	0.49850839	2.052523
96	0.64904690	-0.56094730	-0.36408111		96.00000000	0.35770833	-0.20065552	2.073902
97	0.65911615	-2.86905770	-1.89104227		97.00000000	0.35402062	-1.01570558	2.095378
98	0.66881251	-5.44926310	-3.64453533		98.00000000	0.35040816	-1.90946627	2.116803
99	0.67914450	-8.51859470	-5.78535674		99.00000000	0.34686869	-2.95483376	2.138170
100	0.68361461	-9.99960610	-6.83587682		100.00000000	0.34340000	-3.43386473	2.159536
101	0.68361682	-9.99994280	-6.83612910		101.00000000	0.34000000	-3.39998055	2.181047
12:21 02/04/2018
Test Lot:	JK-PERC
Recipe:	Recipe_YJX-LID
Cell Name:	1-0-10min
Test Order:	3
Test Condition:	Light
1	-0.29986447	8.83976080	-2.65073019		1.00000000	34.34000000	303.55738587	0.000000
2	-0.29006130	8.85008240	-2.56706641		2.00000000	17.17000000	151.95591481	0.061790
3	-0.27992246	8.82705590	-2.47089120		3.00000000	11.44666667	101.04036654	0.083207
4	-0.27008429	8.84781650	-2.38965624		4.00000000	8.58500000	75.95850465	0.104705
5	-0.25988889	8.83427520	-2.29592998		5.00000000	6.86800000	60.67380207	0.126100
6	-0.24977310	8.84457020	-2.20913572		6.00000000	5.72333333	50.62042344	0.147440
7	-0.23993494	8.84537120	-2.12231361		7.00000000	4.90571429	43.39286386	0.168808
8	-0.22977600	8.84221270	-2.03172827		8.00000000	4.29250000	37.95519801	0.190314
9	-0.21996464	8.83065890	-1.94243271		9.00000000	3.81555556	33.69386963	0.211693
10	-0.20984589	8.85090730	-1.85732652		10.00000000	3.43400000	30.39401567	0.233064
11	-0.20000549	8.85330870	-1.77071034		11.00000000	3.12181818	27.63842007	0.254421
12	-0.18986069	8.84461020	-1.67924380		12.00000000	2.86166667	25.31032619	0.275909
13	-0.18007016	8.84473230	-1.59267236		13.00000000	2.64153846	23.36370055	0.297297
14	-0.16992015	8.84570880	-1.50306417		14.00000000	2.45285714	21.69726001	0.318690
15	-0.16011102	8.83791540	-1.41504765		15.00000000	2.28933333	20.23293432	0.340094
16	-0.14995654	8.84315200	-1.32608848		16.00000000	2.14625000	18.97961498	0.361556
17	-0.13980876	8.84269810	-1.23628666		17.00000000	2.02000000	17.86225016	0.382930
18	-0.13002568	8.84992600	-1.15071765		18.00000000	1.90777778	16.88369216	0.404320
19	-0.11986227	8.84256650	-1.05989009		19.00000000	1.80736842	15.98177545	0.425689
20	-0.11005687	8.83329200	-0.97216447		20.00000000	1.71700000	15.16676236	0.447185
21	-0.09989197	8.84740920	-0.88378512		21.00000000	1.63523810	14.46762057	0.468561
22	-0.09007242	8.84716420	-0.79688552		22.00000000	1.56090909	13.80961903	0.489936
23	-0.07992538	8.83899500	-0.70646004		23.00000000	1.49304348	13.19700384	0.511298
24	-0.07011179	8.83381650	-0.61935468		24.00000000	1.43083333	12.63971911	0.532786
25	-0.05996848	8.84843920	-0.53062740		25.00000000	1.37360000	12.15421609	0.554174
26	-0.04980134	8.84608750	-0.44054699		26.00000000	1.32076923	11.68364018	0.575555
27	-0.03998477	8.83928200	-0.35343666		27.00000000	1.27185185	11.24225718	0.596892
28	-0.02980796	8.84410000	-0.26362457		28.00000000	1.22642857	10.84665693	0.618376
29	-0.02001074	8.83942700	-0.17688348		29.00000000	1.18413793	10.46710080	0.639754
30	-0.00986891	8.84493730	-0.08728992		30.00000000	1.14466667	10.12450490	0.661145
31	-0.00062694	8.85276600	-0.00555019		31.00000000	1.10774194	9.80658014	0.682753
32	0.00948193	8.84336090	0.08385211		32.00000000	1.07312500	9.49003167	0.704131
33	0.01929450	8.85331730	0.17082030		33.00000000	1.04060606	9.21281564	0.725489
34	0.02946804	8.83632280	0.26038910		34.00000000	1.01000000	8.92468603	0.746860
35	0.03927986	8.84575370	0.34745999		35.00000000	0.98114286	8.67894806	0.768338
36	0.04946755	8.83929160	0.43725809		36.00000000	0.95388889	8.43170204	0.789731
37	0.05927937	8.83816720	0.52392099		37.00000000	0.92810811	8.20277464	0.811075
38	0.06940454	8.84517480	0.61389524		38.00000000	0.90368421	7.99324481	0.832445
39	0.07956468	8.84598920	0.70382833		39.00000000	0.88051282	7.78900690	0.853937
40	0.08939586	8.84029290	0.79028557		40.00000000	0.85850000	7.58939145	0.875320
41	0.09954707	8.83771800	0.87976896		41.00000000	0.83756098	7.40212771	0.896674
42	0.10935592	8.84054180	0.96676558		42.00000000	0.81761905	7.22819537	0.918052
43	0.11952426	8.83892440	1.05646590		43.00000000	0.79860465	7.05880614	0.939530
44	0.12932640	8.84086040	1.14335665		44.00000000	0.78045455	6.89988968	0.960914
45	0.13948283	8.83553500	1.23240543		45.00000000	0.76311111	6.74249493	0.982264
46	0.14930061	8.84936520	1.32121562		46.00000000	0.74652174	6.60624350	1.003635
47	0.15943620	8.83729930	1.40898542		47.00000000	0.73063830	6.45686932	1.025107
48	0.16959633	8.84716030	1.50044592		48.00000000	0.71541667	6.32940593	1.046476
49	0.17941411	8.84612080	1.58711889		49.00000000	0.70081633	6.19950588	1.067820
50	0.18953183	8.84134480	1.67571626		50.00000000	0.68680000	6.07223561	1.089196
51	0.19933175	8.85407640	1.76489854		51.00000000	0.67333333	5.96174478	1.110667
52	0.20948966	8.83748440	1.85136160		52.00000000	0.66038462	5.83613874	1.132048
53	0.21928661	8.84171010	1.93886863		53.00000000	0.64792453	5.72876085	1.153434
54	0.22945568	8.84640980	2.02985898		54.00000000	0.63592593	5.62566134	1.174807
55	0.23927867	8.84025290	2.11528396		55.00000000	0.62436364	5.51953245	1.196335
56	0.24941351	8.82643510	2.20143216		56.00000000	0.61321429	5.41249610	1.217719
57	0.25954241	8.85218050	2.29751626		57.00000000	0.60245614	5.33305050	1.239097
58	0.26936316	8.82475470	2.37706381		58.00000000	0.59206897	5.22486339	1.260451
59	0.27951512	8.84138770	2.47130154		59.00000000	0.58203390	5.14598735	1.281936
60	0.28934255	8.83634950	2.55673190		60.00000000	0.57233333	5.05733736	1.303305
61	0.29950419	8.84724900	2.64978815		61.00000000	0.56295082	4.98056608	1.324698
62	0.30931824	8.82478620	2.72966734		62.00000000	0.55387097	4.88779287	1.346190
63	0.31945905	8.84451200	2.82545940		63.00000000	0.54507937	4.82096099	1.367573
64	0.32928130	8.82944390	2.90737077		64.00000000	0.53656250	4.73754849	1.388947
65	0.33944070	8.84138490	3.00112588		65.00000000	0.52830769	4.67097165	1.410324
66	0.34925550	8.84224220	3.08820172		66.00000000	0.52030303	4.60064541	1.431805
67	0.35940745	8.83432390	3.17512183		67.00000000	0.51253731	4.52792064	1.453202
68	0.36956239	8.82685380	3.26207319		68.00000000	0.50500000	4.45756117	1.474545
69	0.37941590	8.83772180	3.35317217		69.00000000	0.49768116	4.39836763	1.495917
70	0.38953733	8.83941170	3.44328083		70.00000000	0.49057143	4.33636283	1.517411
71	0.39935511	8.84028340	3.53041235		71.00000000	0.48366197	4.27570890	1.538783
72	0.40951824	8.82765960	3.61508762		72.00000000	0.47694444	4.21030320	1.560141
73	0.41933602	8.82157990	3.69920621		73.00000000	0.47041096	4.14976786	1.581513
74	0.42945895	8.83484270	3.79420227		74.00000000	0.46405405	4.09984457	1.602991
75	0.43929163	8.82803730	3.87808290		75.00000000	0.45786667	4.04206401	1.624389
76	0.44944283	8.83153150	3.96926851		76.00000000	0.45184211	3.99045779	1.645742
77	0.45958734	8.82030010	4.05369826		77.00000000	0.44597403	3.93362475	1.667117
78	0.46944830	8.80433270	4.13317902		78.00000000	0.44025641	3.87616391	1.688600
79	0.47958982	8.81285190	4.22655406		79.00000000	0.43468354	3.83080170	1.709963
80	0.48942399	8.77862360	4.29646899		80.00000000	0.42925000	3.76822418	1.731303
81	0.49949631	8.76084520	4.37600985		81.00000000	0.42395062	3.71416573	1.752685
82	0.50937957	8.72886850	4.44630728		82.00000000	0.41878049	3.65547981	1.774169
83	0.51945937	8.69394110	4.51614917		83.00000000	0.41373494	3.59698720	1.795541
84	0.52928603	8.63123040	4.56838967		84.00000000	0.40880952	3.52852919	1.816907
85	0.53941196	8.53286270	4.60272819		85.00000000	0.40400000	3.44727653	1.838272
86	0.54955572	8.39661980	4.61441044		86.00000000	0.39930233	3.35278981	1.859753
87	0.55932665	8.23512270	4.60612359		87.00000000	0.39471264	3.25050705	1.881132
88	0.56947935	7.93795680	4.52050248		88.00000000	0.39022727	3.09760723	1.902512
89	0.57928294	7.59524200	4.39979412		89.00000000	0.38584270	2.93056865	1.923869
90	0.58941633	7.08101370	4.17366511		90.00000000	0.38155556	2.70180012	1.945350
91	0.59921253	6.44090800	3.85947278		91.00000000	0.37736264	2.43055803	1.966728
92	0.60930717	5.55490880	3.38464576		92.00000000	0.37326087	2.07343009	1.988207
93	0.61911821	4.48870800	2.77904086		93.00000000	0.36924731	1.65744336	2.009716
94	0.62918460	3.10638830	1.95449168		94.00000000	0.36531915	1.13482313	2.031093
95	0.63933212	1.40473760	0.89809387		95.00000000	0.36147368	0.50777568	2.052457
96	0.64903897	-0.53563082	-0.34764528		96.00000000	0.35770833	-0.19159961	2.073839
97	0.65910310	-2.86828900	-1.89049817		97.00000000	0.35402062	-1.01543345	2.095327
98	0.66884351	-5.48665900	-3.66971626		98.00000000	0.35040816	-1.92257010	2.116721
99	0.67912126	-8.58466050	-5.83002546		99.00000000	0.34686869	-2.97774991	2.138071
100	0.68333012	-10.00021300	-6.83344675		100.00000000	0.34340000	-3.43407314	2.159448
101	0.68333310	-10.00003700	-6.83335628		101.00000000	0.34000000	-3.40001258	2.180963
12:21 02/04/2018
Test Lot:	JK-PERC
Recipe:	Recipe_YJX-LID
Cell Name:	1-0-10min
Test Order:	4
Test Condition:	Light
1	-0.29989752	8.84150700	-2.65154602		1.00000000	34.34000000	303.61735038	0.000000
2	-0.29003331	8.83797360	-2.56330674		2.00000000	17.17000000	151.74800671	0.061735
3	-0.27991903	8.82896230	-2.47139456		3.00000000	11.44666667	101.06218846	0.083214
4	-0.27009797	8.85956760	-2.39295122		4.00000000	8.58500000	76.05938785	0.104650
5	-0.25992560	8.83507820	-2.29646300		5.00000000	6.86800000	60.67931708	0.126020
6	-0.24979940	8.84590440	-2.20970161		6.00000000	5.72333333	50.62805952	0.147398
7	-0.23996422	8.83667760	-2.12048645		7.00000000	4.90571429	43.35021554	0.168912
8	-0.22981866	8.84574600	-2.03291749		8.00000000	4.29250000	37.97036471	0.190313
9	-0.21998571	8.84264850	-1.94525631		9.00000000	3.81555556	33.73961661	0.211664
10	-0.20981930	8.84541230	-1.85593822		10.00000000	3.43400000	30.37514584	0.233040
11	-0.20000347	8.83122160	-1.76627496		11.00000000	3.12181818	27.56946816	0.254519
12	-0.18985493	8.84278390	-1.67884612		12.00000000	2.86166667	25.30509993	0.275885
13	-0.18008077	8.84704780	-1.59318318		13.00000000	2.64153846	23.36981703	0.297235
14	-0.16992703	8.83150200	-1.50071091		14.00000000	2.45285714	21.66241276	0.318608
15	-0.16011044	8.84677410	-1.41646089		15.00000000	2.28933333	20.25321484	0.340084
16	-0.14999540	8.82715610	-1.32403281		16.00000000	2.14625000	18.94528378	0.361476
17	-0.13981858	8.84633350	-1.23688179		17.00000000	2.02000000	17.86959367	0.382810
18	-0.12998116	8.84779360	-1.15004648		18.00000000	1.90777778	16.87962401	0.404173
19	-0.11984528	8.83331110	-1.05863064		19.00000000	1.80736842	15.96504754	0.425659
20	-0.11002870	8.83679770	-0.97230136		20.00000000	1.71700000	15.17278165	0.447044
21	-0.09990845	8.84732630	-0.88392265		21.00000000	1.63523810	14.46748501	0.468442
22	-0.09004200	8.82724950	-0.79482322		22.00000000	1.56090909	13.77853399	0.489820
23	-0.07991058	8.85182860	-0.70735479		23.00000000	1.49304348	13.21616496	0.511303
24	-0.07009698	8.84339240	-0.61989507		24.00000000	1.43083333	12.65342063	0.532702
25	-0.05993132	8.84565070	-0.53013155		25.00000000	1.37360000	12.15038580	0.554044
26	-0.04978949	8.84327220	-0.44030197		26.00000000	1.32076923	11.67992182	0.575419
27	-0.04000565	8.83624650	-0.35349982		27.00000000	1.27185185	11.23839647	0.596891
28	-0.02983330	8.85963060	-0.26431200		28.00000000	1.22642857	10.86570410	0.618264
29	-0.02003682	8.83256150	-0.17697640		29.00000000	1.18413793	10.45897110	0.639621
30	-0.00985032	8.83767030	-0.08705387		30.00000000	1.14466667	10.11618660	0.661049
31	-0.00063141	8.84465600	-0.00558463		31.00000000	1.10774194	9.79759636	0.682650
32	0.00949459	8.82964320	0.08383383		32.00000000	1.07312500	9.47531086	0.704027
33	0.01932503	8.84727760	0.17097390		33.00000000	1.04060606	9.20653069	0.725420
34	0.02943904	8.83358670	0.26005232		34.00000000	1.01000000	8.92192257	0.746776
35	0.03926130	8.85370160	0.34760780		35.00000000	0.98114286	8.68674608	0.768252
36	0.04942145	8.82620530	0.43620388		36.00000000	0.95388889	8.41921917	0.789638
37	0.05923478	8.83429430	0.52329744		37.00000000	0.92810811	8.19918017	0.811019
38	0.06941726	8.84553530	0.61403283		38.00000000	0.90368421	7.99357058	0.832438
39	0.07954020	8.83755970	0.70294127		39.00000000	0.88051282	7.78158462	0.853906
40	0.08937362	8.84942250	0.79090491		40.00000000	0.85850000	7.59722922	0.875278
41	0.09950475	8.82880690	0.87850819		41.00000000	0.83756098	7.39466412	0.896680
42	0.10933891	8.84269050	0.96685014		42.00000000	0.81761905	7.22995219	0.918040
43	0.11949386	8.83407690	1.05561795		43.00000000	0.79860465	7.05493490	0.939519
44	0.12932356	8.84119320	1.14337458		44.00000000	0.78045455	6.90014942	0.960894
45	0.13945469	8.83023070	1.23141708		45.00000000	0.76311111	6.73844716	0.982245
46	0.14928661	8.83403210	1.31880270		46.00000000	0.74652174	6.59479701	1.003611
47	0.15943114	8.83147720	1.40801248		47.00000000	0.73063830	6.45261547	1.025088
48	0.16956301	8.85074040	1.50075818		48.00000000	0.71541667	6.33196719	1.046461
49	0.17940611	8.82866190	1.58391589		49.00000000	0.70081633	6.18727040	1.067843
50	0.18954766	8.83783050	1.67519009		50.00000000	0.68680000	6.06982199	1.089196
51	0.19934610	8.83768650	1.76175834		51.00000000	0.67333333	5.95070891	1.110677
52	0.20947202	8.84211250	1.85217517		52.00000000	0.66038462	5.83919506	1.132064
53	0.21932553	8.83210750	1.93710666		53.00000000	0.64792453	5.72253909	1.153443
54	0.22946410	8.82791900	2.02569049		54.00000000	0.63592593	5.61390256	1.174917
55	0.23927370	8.83881860	2.11489683		55.00000000	0.62436364	5.51863692	1.196304
56	0.24939442	8.82667060	2.20132239		56.00000000	0.61321429	5.41264051	1.217641
57	0.25953671	8.83524890	2.29307143		57.00000000	0.60245614	5.32284995	1.239014
58	0.26939321	8.82565980	2.37757282		58.00000000	0.59206897	5.22539927	1.260506
59	0.27951169	8.83172420	2.46857016		59.00000000	0.58203390	5.14036286	1.281887
60	0.28933543	8.84382150	2.55883090		60.00000000	0.57233333	5.06161384	1.303222
61	0.29946133	8.84104820	2.64755205		61.00000000	0.56295082	4.97707533	1.324608
62	0.30931038	8.83878330	2.73392742		62.00000000	0.55387097	4.89554546	1.346086
63	0.31943631	8.84428880	2.82518698		63.00000000	0.54507937	4.82083932	1.367459
64	0.32927269	8.82952310	2.90732082		64.00000000	0.53656250	4.73759099	1.388817
65	0.33942989	8.83493330	2.99884044		65.00000000	0.52830769	4.66756322	1.410186
66	0.34923205	8.84435370	3.08873177		66.00000000	0.52030303	4.60174403	1.431671
67	0.35938475	8.82248880	3.17066793		67.00000000	0.51253731	4.52185471	1.453041
68	0.36954492	8.83914180	3.26645995		68.00000000	0.50500000	4.46376661	1.474384
69	0.37937981	8.84010980	3.35375918		69.00000000	0.49768116	4.39955609	1.495764
70	0.38947970	8.83597280	3.44143204		70.00000000	0.49057143	4.33467580	1.517252
71	0.39936447	8.83495330	3.52836644		71.00000000	0.48366197	4.27313093	1.538638
72	0.40946358	8.83087640	3.61592227		72.00000000	0.47694444	4.21183744	1.560004
73	0.41933349	8.83291050	3.70393519		73.00000000	0.47041096	4.15509790	1.581364
74	0.42946982	8.83133700	3.79279271		74.00000000	0.46405405	4.09821774	1.602845
75	0.43925932	8.82067970	3.87456577		75.00000000	0.45786667	4.03869521	1.624233
76	0.44942096	8.82108500	3.96438049		76.00000000	0.45184211	3.98573762	1.645605
77	0.45958558	8.81707670	4.05220131		77.00000000	0.44597403	3.93218719	1.666960
78	0.46943390	8.80398270	4.13288793		78.00000000	0.44025641	3.87600982	1.688446
79	0.47956949	8.79833980	4.21941533		79.00000000	0.43468354	3.82449353	1.709814
80	0.48936868	8.78401950	4.29862403		80.00000000	0.42925000	3.77054037	1.731203
81	0.49953255	8.74930760	4.37056394		81.00000000	0.42395062	3.70927436	1.752549
82	0.50936520	8.74866490	4.45626545		82.00000000	0.41878049	3.66377015	1.774023
83	0.51950228	8.67493440	4.50664820		83.00000000	0.41373494	3.58912346	1.795409
84	0.52926427	8.62061020	4.56258096		84.00000000	0.40880952	3.52418755	1.816801
85	0.53939617	8.53897290	4.60588928		85.00000000	0.40400000	3.44974505	1.838272
86	0.54954809	8.37890530	4.60461140		86.00000000	0.39930233	3.34571637	1.859659
87	0.55937409	8.20578480	4.59010341		87.00000000	0.39471264	3.23892701	1.881003
88	0.56947398	7.93382740	4.51810827		88.00000000	0.39022727	3.09599583	1.902369
89	0.57927316	7.57832340	4.38991934		89.00000000	0.38584270	2.92404074	1.923850
90	0.58939457	7.05413630	4.15766963		90.00000000	0.38155556	2.69154489	1.945240
91	0.59920567	6.42117600	3.84760507		91.00000000	0.37736264	2.42311191	1.966589
92	0.60928768	5.53953740	3.37517189		92.00000000	0.37326087	2.06769255	1.988092
93	0.61908835	4.45644810	2.75893510		93.00000000	0.36924731	1.64553148	2.009635
94	0.62919718	3.07249810	1.93320714		94.00000000	0.36531915	1.12244239	2.031026
95	0.63929111	1.38937690	0.88821630		95.00000000	0.36147368	0.50222319	2.052373
96	0.64899349	-0.53800333	-0.34916066		96.00000000	0.35770833	-0.19244827	2.073754
97	0.65912461	-2.85700200	-1.88312033		97.00000000	0.35402062	-1.01143762	2.095225
98	0.66890520	-5.44365020	-3.64128593		98.00000000	0.35040816	-1.90749947	2.116617
99	0.67915243	-8.50433250	-5.77573808		99.00000000	0.34686869	-2.94988665	2.137969
100	0.68370670	-9.99965670	-6.83683228		100.00000000	0.34340000	-3.43388211	2.159343
101	0.68372977	-10.00002400	-6.83731411		101.00000000	0.34000000	-3.40000816	2.180834
