# Supplementary material for: Study on the Electrical Injection Regeneration of Industrialized B-Doped Czochralski Silicon PERC Solar Cells
Source: Hindawi journal article supplement (doi:10.1155/2019/5357370), 2019-06-20
Supplement: f1 [file 5357370.f1.zip › section3.2/IVRawData_1-0-20min.csv]

12:46 02/04/2018
Test Lot:	JK-PERC
Recipe:	Recipe_YJX-LID
Cell Name:	1-0-20min
Test Order:	2
Test Condition:	Light
1	-0.29987633	8.80904870	-2.64162519		1.00000000	34.34000000	302.50273236	0.000000
2	-0.29002848	8.78806780	-2.54878995		2.00000000	17.17000000	150.89112413	0.061799
3	-0.27988365	8.78790090	-2.45958978		3.00000000	11.44666667	100.59217230	0.083216
4	-0.27005887	8.79984660	-2.37647663		4.00000000	8.58500000	75.54668306	0.104715
5	-0.25994828	8.78379920	-2.28333349		5.00000000	6.86800000	60.32713291	0.126096
6	-0.24978262	8.80197910	-2.19858140		6.00000000	5.72333333	50.37666038	0.147565
7	-0.23993699	8.78530220	-2.10791897		7.00000000	4.90571429	43.09818251	0.168943
8	-0.22978845	8.80404570	-2.02306802		8.00000000	4.29250000	37.79136617	0.190424
9	-0.21994506	8.78962800	-1.93323526		9.00000000	3.81555556	33.53731395	0.211798
10	-0.20977791	8.79807280	-1.84564132		10.00000000	3.43400000	30.21258200	0.233177
11	-0.19997470	8.79511170	-1.75879982		11.00000000	3.12181818	27.45673962	0.254540
12	-0.18985146	8.80220790	-1.67111202		12.00000000	2.86166667	25.18898494	0.276030
13	-0.18004306	8.79346180	-1.58320177		13.00000000	2.64153846	23.22826755	0.297419
14	-0.16991162	8.79378890	-1.49416692		14.00000000	2.45285714	21.56990792	0.318805
15	-0.16009206	8.78896430	-1.40704340		15.00000000	2.28933333	20.12086894	0.340288
16	-0.14993457	8.78659920	-1.31741497		16.00000000	2.14625000	18.85823853	0.361678
17	-0.13980165	8.78511240	-1.22817321		17.00000000	2.02000000	17.74592705	0.383029
18	-0.12997612	8.80231950	-1.14409134		18.00000000	1.90777778	16.79286954	0.404399
19	-0.11983725	8.80000500	-1.05456840		19.00000000	1.80736842	15.90485114	0.425887
20	-0.11001620	8.78587150	-0.96658820		20.00000000	1.71700000	15.08534137	0.447263
21	-0.09985276	8.79967780	-0.87867208		21.00000000	1.63523810	14.38956836	0.468614
22	-0.09003393	8.79175280	-0.79155609		22.00000000	1.56090909	13.72312687	0.489994
23	-0.07987794	8.78473470	-0.70170654		23.00000000	1.49304348	13.11599085	0.511475
24	-0.07007400	8.78954120	-0.61591830		24.00000000	1.43083333	12.57636853	0.532865
25	-0.05992619	8.79343990	-0.52695738		25.00000000	1.37360000	12.07866905	0.554225
26	-0.04978955	8.78045080	-0.43717471		26.00000000	1.32076923	11.59694925	0.575598
27	-0.03997817	8.80374530	-0.35195762		27.00000000	1.27185185	11.19705976	0.597057
28	-0.02982739	8.79104330	-0.26221384		28.00000000	1.22642857	10.78158668	0.618438
29	-0.02000261	8.80175590	-0.17605806		29.00000000	1.18413793	10.42249302	0.639788
30	-0.00987639	8.78644750	-0.08677834		30.00000000	1.14466667	10.05755357	0.661160
31	-0.00064184	8.80029390	-0.00564835		31.00000000	1.10774194	9.74845460	0.682758
32	0.00948939	8.78015230	0.08331827		32.00000000	1.07312500	9.42220094	0.704131
33	0.01932059	8.79114530	0.16985009		33.00000000	1.04060606	9.14811908	0.725494
34	0.02947555	8.77905460	0.25876743		34.00000000	1.01000000	8.86684515	0.746875
35	0.03929558	8.79854300	0.34574385		35.00000000	0.98114286	8.63262762	0.768350
36	0.04942449	8.79261020	0.43457029		36.00000000	0.95388889	8.38717317	0.789743
37	0.05927355	8.78286740	0.52059175		37.00000000	0.92810811	8.15145045	0.811093
38	0.06944414	8.80022530	0.61112410		38.00000000	0.90368421	7.95262465	0.832446
39	0.07955965	8.78769870	0.69914627		39.00000000	0.88051282	7.73768137	0.853928
40	0.08940202	8.79151920	0.78597958		40.00000000	0.85850000	7.54751923	0.875301
41	0.09956740	8.79034230	0.87523151		41.00000000	0.83756098	7.36244767	0.896695
42	0.10937106	8.78754040	0.96110261		42.00000000	0.81761905	7.18486041	0.918050
43	0.11951783	8.79418090	1.05106142		43.00000000	0.79860465	7.02307377	0.939526
44	0.12932745	8.78502180	1.13614447		44.00000000	0.78045455	6.85631020	0.960904
45	0.13952111	8.79713820	1.22738649		45.00000000	0.76311111	6.71319391	0.982278
46	0.14929277	8.78562450	1.31163022		46.00000000	0.74652174	6.55865968	1.003767
47	0.15945666	8.78843690	1.40137479		47.00000000	0.73063830	6.42116858	1.025153
48	0.16959375	8.79024220	1.49077014		48.00000000	0.71541667	6.28868577	1.046508
49	0.17940858	8.79005530	1.57701134		49.00000000	0.70081633	6.16021427	1.067881
50	0.18955088	8.78298280	1.66482212		50.00000000	0.68680000	6.03215259	1.089367
51	0.19932775	8.78702160	1.75149724		51.00000000	0.67333333	5.91659454	1.110757
52	0.20946038	8.77764890	1.83856967		52.00000000	0.66038462	5.79662429	1.132106
53	0.21930274	8.80713460	1.93142875		53.00000000	0.64792453	5.70635853	1.153505
54	0.22944580	8.78583340	2.01587257		54.00000000	0.63592593	5.58713924	1.174982
55	0.23928295	8.79152390	2.10366177		55.00000000	0.62436364	5.48910783	1.196365
56	0.24943642	8.78988360	2.19251710		56.00000000	0.61321429	5.39008219	1.217711
57	0.25958246	8.77612210	2.27812736		57.00000000	0.60245614	5.28722865	1.239088
58	0.26940694	8.79968640	2.37069659		58.00000000	0.59206897	5.21002122	1.260569
59	0.27952394	8.78339000	2.45516778		59.00000000	0.58203390	5.11223072	1.281939
60	0.28936630	8.80709740	2.54847719		60.00000000	0.57233333	5.04059541	1.303284
61	0.29950789	8.78138260	2.63009337		61.00000000	0.56295082	4.94348653	1.324668
62	0.30933908	8.78744700	2.71830077		62.00000000	0.55387097	4.86711177	1.346140
63	0.31946650	8.77279760	2.80261494		63.00000000	0.54507937	4.78187095	1.367516
64	0.32929844	8.78682610	2.89348813		64.00000000	0.53656250	4.71468138	1.388874
65	0.33944893	8.78297420	2.98137119		65.00000000	0.52830769	4.64011283	1.410242
66	0.34927639	8.78727150	3.06918647		66.00000000	0.52030303	4.57204399	1.431731
67	0.35942543	8.78563310	3.15777995		67.00000000	0.51253731	4.50296479	1.453115
68	0.36954764	8.78385540	3.24605303		68.00000000	0.50500000	4.43584698	1.474486
69	0.37941083	8.79398250	3.33653220		69.00000000	0.49768116	4.37659941	1.495854
70	0.38954642	8.77943130	3.41999603		70.00000000	0.49057143	4.30693815	1.517327
71	0.39936498	8.78006360	3.50644992		71.00000000	0.48366197	4.24658287	1.538712
72	0.40948123	8.78053280	3.59546337		72.00000000	0.47694444	4.18782634	1.560095
73	0.41931987	8.78205490	3.68249012		73.00000000	0.47041096	4.13117487	1.581445
74	0.42949122	8.77916810	3.77057562		74.00000000	0.46405405	4.07400855	1.602927
75	0.43930751	8.78192140	3.85796402		75.00000000	0.45786667	4.02094908	1.624311
76	0.44945803	8.75789360	3.93630560		76.00000000	0.45184211	3.95718508	1.645701
77	0.45957950	8.77466200	4.03265477		77.00000000	0.44597403	3.91327134	1.667178
78	0.46943524	8.75468060	4.10975559		78.00000000	0.44025641	3.85430425	1.688562
79	0.47960880	8.74556350	4.19444922		79.00000000	0.43468354	3.80155254	1.709911
80	0.48941395	8.72419070	4.26974063		80.00000000	0.42925000	3.74485886	1.731289
81	0.49954063	8.70306300	4.34753357		81.00000000	0.42395062	3.68966893	1.752769
82	0.50936663	8.66201590	4.41214185		82.00000000	0.41878049	3.62748324	1.774144
83	0.51949626	8.61347580	4.47466846		83.00000000	0.41373494	3.56369589	1.795490
84	0.52930069	8.53423880	4.51717849		84.00000000	0.40880952	3.48887810	1.816873
85	0.53939384	8.43704510	4.55089015		85.00000000	0.40400000	3.40856622	1.838353
86	0.54955626	8.27762600	4.54902119		86.00000000	0.39930233	3.30527531	1.859750
87	0.55933386	8.06266120	4.50971941		87.00000000	0.39471264	3.18243432	1.881102
88	0.56947696	7.76750180	4.42341331		88.00000000	0.39022727	3.03109104	1.902480
89	0.57927835	7.35182090	4.25875068		89.00000000	0.38584270	2.83664640	1.923948
90	0.58939087	6.80320690	4.00974803		90.00000000	0.38155556	2.59580139	1.945319
91	0.59918863	6.07924370	3.64261370		91.00000000	0.37736264	2.29407944	1.966672
92	0.60928029	5.11770150	3.11811465		92.00000000	0.37326087	1.91023771	1.988150
93	0.61909515	3.94445230	2.44199129		93.00000000	0.36924731	1.45647841	2.009662
94	0.62917638	2.45096400	1.54208866		94.00000000	0.36531915	0.89538408	2.031053
95	0.63927180	0.66814965	0.42712923		95.00000000	0.36147368	0.24151852	2.052423
96	0.64901298	-1.36655870	-0.88691433		96.00000000	0.35770833	-0.48882943	2.073805
97	0.65910912	-3.77930360	-2.49097347		97.00000000	0.35402062	-1.33795140	2.095287
98	0.66890234	-6.47604040	-4.33183858		98.00000000	0.35040816	-2.26925742	2.116667
99	0.67919576	-9.62221620	-6.53536844		99.00000000	0.34686869	-3.33764550	2.138045
100	0.68024743	-10.00022000	-6.80262395		100.00000000	0.34340000	-3.43407555	2.159449
101	0.68030620	-10.00009300	-6.80312527		101.00000000	0.34000000	-3.40003162	2.180938
12:46 02/04/2018
Test Lot:	JK-PERC
Recipe:	Recipe_YJX-LID
Cell Name:	1-0-20min
Test Order:	3
Test Condition:	Light
1	-0.29985097	8.79440120	-2.63700973		1.00000000	34.34000000	301.99973721	0.000000
2	-0.29005224	8.79607010	-2.55131984		2.00000000	17.17000000	151.02852362	0.061802
3	-0.27993342	8.79402450	-2.46174135		3.00000000	11.44666667	100.66226711	0.083231
4	-0.27010268	8.79335980	-2.37511005		4.00000000	8.58500000	75.49099388	0.104723
5	-0.25995559	8.78744410	-2.28434522		5.00000000	6.86800000	60.35216608	0.126159
6	-0.24978244	8.79346850	-2.19645402		6.00000000	5.72333333	50.32795138	0.147509
7	-0.23998444	8.77909660	-2.10684658		7.00000000	4.90571429	43.06773961	0.168896
8	-0.22983736	8.79566100	-2.02157150		8.00000000	4.29250000	37.75537484	0.190401
9	-0.21999395	8.80137730	-1.93624976		9.00000000	3.81555556	33.58214405	0.211775
10	-0.20985058	8.79569820	-1.84578237		10.00000000	3.43400000	30.20442762	0.233106
11	-0.20003173	8.78070640	-1.75641989		11.00000000	3.12181818	27.41176889	0.254490
12	-0.18988763	8.79517560	-1.67009505		12.00000000	2.86166667	25.16886084	0.275977
13	-0.18011940	8.78913120	-1.58309304		13.00000000	2.64153846	23.21682811	0.297342
14	-0.16994625	8.79627510	-1.49489397		14.00000000	2.45285714	21.57600621	0.318706
15	-0.16011997	8.79153440	-1.40770022		15.00000000	2.28933333	20.12675275	0.340079
16	-0.14998479	8.79212190	-1.31868456		16.00000000	2.14625000	18.87009163	0.361564
17	-0.13982132	8.77838040	-1.22740473		17.00000000	2.02000000	17.73232841	0.382961
18	-0.12999801	8.79557130	-1.14340677		18.00000000	1.90777778	16.77999547	0.404308
19	-0.11981967	8.78529930	-1.05265166		19.00000000	1.80736842	15.87827252	0.425687
20	-0.11001869	8.79520420	-0.96763684		20.00000000	1.71700000	15.10136561	0.447166
21	-0.09986267	8.78986170	-0.87777901		21.00000000	1.63523810	14.37351670	0.468538
22	-0.09003191	8.78696350	-0.79110714		22.00000000	1.56090909	13.71565121	0.489895
23	-0.07991460	8.79398730	-0.70276798		23.00000000	1.49304348	13.12980539	0.511265
24	-0.07007863	8.78053670	-0.61532802		24.00000000	1.43083333	12.56348459	0.532734
25	-0.05991592	8.79287910	-0.52683340		25.00000000	1.37360000	12.07789873	0.554134
26	-0.04977553	8.78606890	-0.43733124		26.00000000	1.32076923	11.60436946	0.575515
27	-0.03995743	8.78756710	-0.35112856		27.00000000	1.27185185	11.17648349	0.596859
28	-0.02979322	8.79711150	-0.26209430		28.00000000	1.22642857	10.78902889	0.618333
29	-0.01997661	8.78130910	-0.17542076		29.00000000	1.18413793	10.39828119	0.639715
30	-0.00987046	8.79143910	-0.08677553		30.00000000	1.14466667	10.06326729	0.661094
31	-0.00061654	8.78549770	-0.00541658		31.00000000	1.10774194	9.73206423	0.682618
32	0.00949387	8.78793620	0.08343152		32.00000000	1.07312500	9.43055403	0.704098
33	0.01931690	8.77450180	0.16949621		33.00000000	1.04060606	9.13079975	0.725478
34	0.02942202	8.79150580	0.25866387		34.00000000	1.01000000	8.87942086	0.746841
35	0.03925473	8.79830170	0.34537495		35.00000000	0.98114286	8.63239087	0.768261
36	0.04943576	8.77973750	0.43403300		36.00000000	0.95388889	8.37489405	0.789767
37	0.05924614	8.78958030	0.52074871		37.00000000	0.92810811	8.15768074	0.811148
38	0.06937806	8.79245380	0.61000335		38.00000000	0.90368421	7.94560167	0.832512
39	0.07951071	8.78422830	0.69844024		39.00000000	0.88051282	7.73462564	0.853884
40	0.08935905	8.78440670	0.78496619		40.00000000	0.85850000	7.54141315	0.875361
41	0.09949394	8.80371670	0.87591643		41.00000000	0.83756098	7.37364955	0.896733
42	0.10932441	8.78030780	0.95990197		42.00000000	0.81761905	7.17894690	0.918121
43	0.11946823	8.78011420	1.04894470		43.00000000	0.79860465	7.01184004	0.939460
44	0.12929499	8.79114060	1.13665044		44.00000000	0.78045455	6.86108564	0.960931
45	0.13944475	8.78859520	1.22552346		45.00000000	0.76311111	6.70667465	0.982317
46	0.14924993	8.77235410	1.30927324		46.00000000	0.74652174	6.54875304	1.003694
47	0.15942277	8.78129390	1.39993820		47.00000000	0.73063830	6.41594963	1.025166
48	0.16957329	8.78507230	1.48971361		48.00000000	0.71541667	6.28498714	1.046542
49	0.17935613	8.78643420	1.57590083		49.00000000	0.70081633	6.15767654	1.067906
50	0.18952750	8.78340720	1.66469721		50.00000000	0.68680000	6.03244406	1.089286
51	0.19934458	8.78666970	1.75157498		51.00000000	0.67333333	5.91635760	1.110770
52	0.20946309	8.78883740	1.84093704		52.00000000	0.66038462	5.80401301	1.132141
53	0.21926454	8.77795510	1.92469429		53.00000000	0.64792453	5.68745242	1.153506
54	0.22942622	8.77945710	2.01423766		54.00000000	0.63592593	5.58308439	1.174881
55	0.23926264	8.79657080	2.10469075		55.00000000	0.62436364	5.49225893	1.196356
56	0.24938115	8.77749440	2.18894165		56.00000000	0.61321429	5.38248496	1.217747
57	0.25953391	8.79012390	2.28133523		57.00000000	0.60245614	5.29566412	1.239087
58	0.26936513	8.77155110	2.36275000		58.00000000	0.59206897	5.19336319	1.260452
59	0.27950150	8.78777410	2.45619604		59.00000000	0.58203390	5.11478242	1.281935
60	0.28932974	8.78476520	2.54169383		60.00000000	0.57233333	5.02781395	1.303310
61	0.29946539	8.78178790	2.62984154		61.00000000	0.56295082	4.94371470	1.324722
62	0.30931371	8.78800110	2.71824922		62.00000000	0.55387097	4.86741867	1.346096
63	0.31945828	8.78285980	2.80575729		63.00000000	0.54507937	4.78735564	1.367578
64	0.32925305	8.77083020	2.88782259		64.00000000	0.53656250	4.70609858	1.388956
65	0.33941397	8.79841140	2.98630374		65.00000000	0.52830769	4.64826842	1.410294
66	0.34924147	8.77891250	3.06596031		66.00000000	0.52030303	4.56769478	1.431663
67	0.35937786	8.78623390	3.15757794		67.00000000	0.51253731	4.50327272	1.453137
68	0.36955220	8.77772430	3.24382733		68.00000000	0.50500000	4.43275077	1.474501
69	0.37935066	8.77659800	3.32940824		69.00000000	0.49768116	4.36794747	1.495860
70	0.38949224	8.77965550	3.41960769		70.00000000	0.49057143	4.30704814	1.517226
71	0.39931452	8.77860740	3.50542540		71.00000000	0.48366197	4.24587857	1.538699
72	0.40947548	8.77439210	3.59289842		72.00000000	0.47694444	4.18489757	1.560075
73	0.41928360	8.76961710	3.67695663		73.00000000	0.47041096	4.12532399	1.581469
74	0.42944679	8.78047470	3.77074667		74.00000000	0.46405405	4.07461488	1.602811
75	0.43924749	8.75637630	3.84621631		75.00000000	0.45786667	4.00925283	1.624289
76	0.44939876	8.77766130	3.94467010		76.00000000	0.45184211	3.96611696	1.645664
77	0.45955300	8.74611470	4.01930325		77.00000000	0.44597403	3.90053998	1.667051
78	0.46942887	8.76056670	4.11246293		78.00000000	0.44025641	3.85689565	1.688519
79	0.47955185	8.73657040	4.18963850		79.00000000	0.43468354	3.79764339	1.709907
80	0.48937935	8.72031970	4.26754439		80.00000000	0.42925000	3.74319723	1.731248
81	0.49951199	8.69802000	4.34476528		81.00000000	0.42395062	3.68753095	1.752635
82	0.50930899	8.66046140	4.41085085		82.00000000	0.41878049	3.62683225	1.774116
83	0.51946920	8.60247710	4.46872190		83.00000000	0.41373494	3.55914534	1.795488
84	0.52924532	8.53994560	4.51972624		84.00000000	0.40880952	3.49121109	1.816861
85	0.53937274	8.42961120	4.54670249		85.00000000	0.40400000	3.40556292	1.838237
86	0.54951584	8.26801680	4.54340620		86.00000000	0.39930233	3.30143834	1.859707
87	0.55931950	8.05360130	4.50453625		87.00000000	0.39471264	3.17885826	1.881082
88	0.56946260	7.75202180	4.41448649		88.00000000	0.39022727	3.02505033	1.902427
89	0.57927072	7.34609130	4.25537560		89.00000000	0.38584270	2.83443568	1.923798
90	0.58937067	6.78144220	3.99678313		90.00000000	0.38155556	2.58749695	1.945269
91	0.59916168	6.07108160	3.63755945		91.00000000	0.37736264	2.29099936	1.966648
92	0.60928166	5.09030060	3.10142680		92.00000000	0.37326087	1.90001003	1.988113
93	0.61907792	3.93224380	2.43436531		93.00000000	0.36924731	1.45197045	2.009519
94	0.62918305	2.44041440	1.53546738		94.00000000	0.36531915	0.89153011	2.031009
95	0.63925469	0.64969379	0.41531980		95.00000000	0.36147368	0.23484721	2.052403
96	0.64904195	-1.37001320	-0.88919604		96.00000000	0.35770833	-0.49006514	2.073759
97	0.65907192	-3.78094320	-2.49191349		97.00000000	0.35402062	-1.33853185	2.095128
98	0.66885626	-6.44693660	-4.31207390		98.00000000	0.35040816	-2.25905921	2.116638
99	0.67916900	-9.59460830	-6.51636052		99.00000000	0.34686869	-3.32806918	2.138039
100	0.68037921	-10.00030500	-6.80399962		100.00000000	0.34340000	-3.43410474	2.159416
101	0.68030477	-10.00027600	-6.80323546		101.00000000	0.34000000	-3.40009384	2.180797
12:47 02/04/2018
Test Lot:	JK-PERC
Recipe:	Recipe_YJX-LID
Cell Name:	1-0-20min
Test Order:	4
Test Condition:	Light
1	-0.29986876	8.78505900	-2.63436475		1.00000000	34.34000000	301.67892606	0.000000
2	-0.29003191	8.79369070	-2.55045091		2.00000000	17.17000000	150.98766932	0.061725
3	-0.27992263	8.78436470	-2.45894247		3.00000000	11.44666667	100.55169460	0.083255
4	-0.27009621	8.78867720	-2.37378840		4.00000000	8.58500000	75.45079376	0.104653
5	-0.25992292	8.78710650	-2.28397038		5.00000000	6.86800000	60.34984744	0.126014
6	-0.24979728	8.78315160	-2.19400738		6.00000000	5.72333333	50.26890432	0.147384
7	-0.23998350	8.79294590	-2.11016193		7.00000000	4.90571429	43.13568032	0.168908
8	-0.22983998	8.78503610	-2.01915252		8.00000000	4.29250000	37.70976746	0.190296
9	-0.21999942	8.79969310	-1.93592738		9.00000000	3.81555556	33.57571789	0.211646
10	-0.20982389	8.79067130	-1.84449285		10.00000000	3.43400000	30.18716524	0.233032
11	-0.20001085	8.78855710	-1.75780678		11.00000000	3.12181818	27.43627735	0.254516
12	-0.18986884	8.79269220	-1.66945827		12.00000000	2.86166667	25.16175418	0.275910
13	-0.18008482	8.78647420	-1.58231062		13.00000000	2.64153846	23.20980954	0.297259
14	-0.16996066	8.79347520	-1.49454485		14.00000000	2.45285714	21.56913845	0.318634
15	-0.16014019	8.78597740	-1.40698809		15.00000000	2.28933333	20.11403093	0.340107
16	-0.15001677	8.78618240	-1.31807470		16.00000000	2.14625000	18.85734398	0.361476
17	-0.13985913	8.78163150	-1.22819134		17.00000000	2.02000000	17.73889563	0.382847
18	-0.13004310	8.80054570	-1.14445024		18.00000000	1.90777778	16.78948552	0.404219
19	-0.11989439	8.77011490	-1.05148758		19.00000000	1.80736842	15.85082872	0.425701
20	-0.11005455	8.78713040	-0.96706368		20.00000000	1.71700000	15.08750290	0.447081
21	-0.09991998	8.77784630	-0.87708218		21.00000000	1.63523810	14.35386866	0.468476
22	-0.09006154	8.79141710	-0.79176855		22.00000000	1.56090909	13.72260287	0.489823
23	-0.07995524	8.78644750	-0.70252254		23.00000000	1.49304348	13.11854814	0.511307
24	-0.07013401	8.79377750	-0.61674291		24.00000000	1.43083333	12.58242997	0.532679
25	-0.06000018	8.77109430	-0.52626725		25.00000000	1.37360000	12.04797513	0.554067
26	-0.04980978	8.80427740	-0.43853912		26.00000000	1.32076923	11.62841869	0.575539
27	-0.03999153	8.77755640	-0.35102793		27.00000000	1.27185185	11.16375136	0.596906
28	-0.02984728	8.78531270	-0.26221766		28.00000000	1.22642857	10.77455850	0.618258
29	-0.02002903	8.78735070	-0.17600212		29.00000000	1.18413793	10.40543528	0.639636
30	-0.00987957	8.79093650	-0.08685064		30.00000000	1.14466667	10.06269198	0.661123
31	-0.00063667	8.78790470	-0.00559503		31.00000000	1.10774194	9.73473056	0.682616
32	0.00950961	8.79533100	0.08364014		32.00000000	1.07312500	9.43848958	0.703979
33	0.01930897	8.79506400	0.16982359		33.00000000	1.04060606	9.15219690	0.725357
34	0.02949164	8.78338340	0.25903634		34.00000000	1.01000000	8.87121723	0.746824
35	0.03928504	8.79097650	0.34535387		35.00000000	0.98114286	8.62520380	0.768226
36	0.04944166	8.78556820	0.43437306		36.00000000	0.95388889	8.38045589	0.789573
37	0.05925218	8.77858070	0.52015008		37.00000000	0.92810811	8.14747193	0.810940
38	0.06940880	8.79651930	0.61055588		38.00000000	0.90368421	7.94927560	0.832425
39	0.07955798	8.78594400	0.69899194		39.00000000	0.88051282	7.73613633	0.853803
40	0.08936553	8.78002740	0.78463178		40.00000000	0.85850000	7.53765352	0.875177
41	0.09949461	8.79546450	0.87510128		41.00000000	0.83756098	7.36673783	0.896555
42	0.10932299	8.77370450	0.95916761		42.00000000	0.81761905	7.17354792	0.918042
43	0.11947812	8.79133700	1.05037242		43.00000000	0.79860465	7.02080262	0.939431
44	0.12930427	8.78453540	1.13587794		44.00000000	0.78045455	6.85593058	0.960786
45	0.13946089	8.77769950	1.22414578		45.00000000	0.76311111	6.69836002	0.982161
46	0.14927365	8.77855590	1.31040708		46.00000000	0.74652174	6.55338282	1.003630
47	0.15940943	8.79842470	1.40255187		47.00000000	0.73063830	6.42846605	1.024995
48	0.16955861	8.78219030	1.48909598		48.00000000	0.71541667	6.28292531	1.046357
49	0.17938253	8.77381610	1.57386933		49.00000000	0.70081633	6.14883357	1.067718
50	0.18951236	8.77876760	1.66368497		50.00000000	0.68680000	6.02925759	1.089192
51	0.19928864	8.80796050	1.75532647		51.00000000	0.67333333	5.93069340	1.110560
52	0.20943037	8.76952550	1.83660497		52.00000000	0.66038462	5.79125972	1.131950
53	0.21928333	8.78188320	1.92572059		53.00000000	0.64792453	5.68999753	1.153300
54	0.22943175	8.79753020	2.01843275		54.00000000	0.63592593	5.59457754	1.174755
55	0.23924823	8.76642700	2.09735214		55.00000000	0.62436364	5.47343824	1.196122
56	0.24938624	8.79088310	2.19232528		56.00000000	0.61321429	5.39069510	1.217496
57	0.25953987	8.77824690	2.27830506		57.00000000	0.60245614	5.28850875	1.238981
58	0.26935264	8.78697680	2.36679540		58.00000000	0.59206897	5.20249626	1.260373
59	0.27950108	8.78322510	2.45492090		59.00000000	0.58203390	5.11213474	1.281713
60	0.28934062	8.77828880	2.53991552		60.00000000	0.57233333	5.02410729	1.303087
61	0.29949054	8.77788830	2.62889451		61.00000000	0.56295082	4.94151941	1.324564
62	0.30931893	8.77581880	2.71452688		62.00000000	0.55387097	4.86067125	1.345939
63	0.31945026	8.78806970	2.80735115		63.00000000	0.54507937	4.79019545	1.367311
64	0.32926449	8.79111860	2.89460318		64.00000000	0.53656250	4.71698457	1.388687
65	0.33943972	8.77525330	2.97866952		65.00000000	0.52830769	4.63603382	1.410175
66	0.34926140	8.79130080	3.07046203		66.00000000	0.52030303	4.57414045	1.431558
67	0.35939419	8.76931860	3.15164216		67.00000000	0.51253731	4.49460300	1.452910
68	0.36955008	8.77315710	3.24212091		68.00000000	0.50500000	4.43044434	1.474327
69	0.37939930	8.79069330	3.33518288		69.00000000	0.49768116	4.37496243	1.495822
70	0.38953286	8.76940060	3.41596970		70.00000000	0.49057143	4.30201738	1.517201
71	0.39934412	8.78367040	3.50770713		71.00000000	0.48366197	4.24832735	1.538564
72	0.40949702	8.77101140	3.59170303		72.00000000	0.47694444	4.18328516	1.559951
73	0.41930827	8.79169270	3.68642946		73.00000000	0.47041096	4.13570859	1.581438
74	0.42944556	8.74544810	3.75569386		74.00000000	0.46405405	4.05836065	1.602814
75	0.43927023	8.78541470	3.85917114		75.00000000	0.45786667	4.02254854	1.624168
76	0.44943428	8.76622010	3.93983982		76.00000000	0.45184211	3.96094735	1.645538
77	0.45959833	8.74438950	4.01890681		77.00000000	0.44597403	3.89977059	1.667018
78	0.46943343	8.75477700	4.10978500		78.00000000	0.44025641	3.85434669	1.688383
79	0.47956550	8.74526410	4.19392695		79.00000000	0.43468354	3.80142239	1.709741
80	0.48936632	8.70399760	4.25944327		80.00000000	0.42925000	3.73619097	1.731112
81	0.49954081	8.70262430	4.34731599		81.00000000	0.42395062	3.68948294	1.752598
82	0.50933570	8.66110520	4.41141008		82.00000000	0.41878049	3.62710186	1.773977
83	0.51949602	8.59987930	4.46760307		83.00000000	0.41373494	3.55807054	1.795365
84	0.52924776	8.53312970	4.51613978		84.00000000	0.40880952	3.48842469	1.816708
85	0.53939772	8.42911820	4.54664714		85.00000000	0.40400000	3.40536375	1.838184
86	0.54954165	8.26949500	4.54443193		86.00000000	0.39930233	3.30202858	1.859566
87	0.55932838	8.05159570	4.50348598		87.00000000	0.39471264	3.17806662	1.880946
88	0.56946784	7.76182130	4.42010761		88.00000000	0.39022727	3.02887436	1.902435
89	0.57926279	7.34734770	4.25604513		89.00000000	0.38584270	2.83492045	1.923811
90	0.58938438	6.77686550	3.99417867		90.00000000	0.38155556	2.58575068	1.945152
91	0.59915400	6.05682800	3.62897272		91.00000000	0.37736264	2.28562059	1.966532
92	0.60930169	5.10838460	3.11254737		92.00000000	0.37326087	1.90676008	1.988080
93	0.61908764	3.91605950	2.42438403		93.00000000	0.36924731	1.44599444	2.009476
94	0.62921375	2.43475250	1.53197975		94.00000000	0.36531915	0.88946171	2.030846
95	0.63929075	0.64961970	0.41529587		95.00000000	0.36147368	0.23482043	2.052229
96	0.64899409	-1.38204120	-0.89693657		96.00000000	0.35770833	-0.49436765	2.073706
97	0.65911126	-3.78802990	-2.49673316		97.00000000	0.35402062	-1.34104069	2.095092
98	0.66890836	-6.46548460	-4.32481670		98.00000000	0.35040816	-2.26555858	2.116425
99	0.67916697	-9.58915140	-6.51263490		99.00000000	0.34686869	-3.32617635	2.137805
100	0.68035781	-10.00033600	-6.80380670		100.00000000	0.34340000	-3.43411538	2.159422
101	0.68036824	-10.00016400	-6.80379398		101.00000000	0.34000000	-3.40005576	2.180822
