# Supplementary material for: Study on the Electrical Injection Regeneration of Industrialized B-Doped Czochralski Silicon PERC Solar Cells
Source: Hindawi journal article supplement (doi:10.1155/2019/5357370), 2019-06-20
Supplement: f1 [file 5357370.f1.zip › section3.2/IVRawData_1-0-30min.csv]

13:07 02/04/2018
Test Lot:	JK-PERC
Recipe:	Recipe_YJX-LID
Cell Name:	1-0-30min
Test Order:	2
Test Condition:	Light
1	-0.29989851	8.75395680	-2.62529860		1.00000000	34.34000000	300.61087651	0.000000
2	-0.29006395	8.75300600	-2.53893149		2.00000000	17.17000000	150.28911302	0.061811
3	-0.27993912	8.75716780	-2.45147385		3.00000000	11.44666667	100.24038075	0.083242
4	-0.27011424	8.76712610	-2.36812560		4.00000000	8.58500000	75.26577757	0.104743
5	-0.26002142	8.74634080	-2.27423595		5.00000000	6.86800000	60.06986861	0.126129
6	-0.24981473	8.75432400	-2.18695909		6.00000000	5.72333333	50.10391436	0.147527
7	-0.24003005	8.75176240	-2.10068597		7.00000000	4.90571429	42.93364583	0.168874
8	-0.22987992	8.76223470	-2.01426181		8.00000000	4.29250000	37.61189245	0.190353
9	-0.22005430	8.75968650	-1.92760668		9.00000000	3.81555556	33.42307049	0.211743
10	-0.20987961	8.74881550	-1.83619799		10.00000000	3.43400000	30.04343243	0.233123
11	-0.20003910	8.75403690	-1.75114966		11.00000000	3.12181818	27.32851156	0.254562
12	-0.18994628	8.74927430	-1.66189211		12.00000000	2.86166667	25.03750662	0.276027
13	-0.18015714	8.74736020	-1.57589940		13.00000000	2.64153846	23.10648841	0.297397
14	-0.16999808	8.75700280	-1.48867366		14.00000000	2.45285714	21.47967687	0.318777
15	-0.16017097	8.75701620	-1.40261978		15.00000000	2.28933333	20.04772909	0.340133
16	-0.15001562	8.75317290	-1.31311266		16.00000000	2.14625000	18.78649734	0.361634
17	-0.13985731	8.76054380	-1.22522609		17.00000000	2.02000000	17.69629848	0.383016
18	-0.13007039	8.74708180	-1.13773634		18.00000000	1.90777778	16.68748828	0.404394
19	-0.11989644	8.74787430	-1.04883899		19.00000000	1.80736842	15.81063176	0.425764
20	-0.11005371	8.76543710	-0.96466887		20.00000000	1.71700000	15.05025550	0.447246
21	-0.09990283	8.75608160	-0.87475734		21.00000000	1.63523810	14.31827820	0.468625
22	-0.09006977	8.75736140	-0.78877354		22.00000000	1.56090909	13.66944502	0.490009
23	-0.07991741	8.75121210	-0.69937420		23.00000000	1.49304348	13.06594015	0.511369
24	-0.07010221	8.75001050	-0.61339505		24.00000000	1.43083333	12.51980669	0.532849
25	-0.06000418	8.75733280	-0.52547656		25.00000000	1.37360000	12.02907233	0.554221
26	-0.04981460	8.73973850	-0.43536655		26.00000000	1.32076923	11.54317770	0.575616
27	-0.04001354	8.76200390	-0.35059883		27.00000000	1.27185185	11.14397089	0.597091
28	-0.02987532	8.75099180	-0.26143867		28.00000000	1.22642857	10.73246637	0.618462
29	-0.02001398	8.74217700	-0.17496573		29.00000000	1.18413793	10.35194339	0.639838
30	-0.00987724	8.75636670	-0.08648875		30.00000000	1.14466667	10.02312108	0.661224
31	-0.00065749	8.74700160	-0.00575109		31.00000000	1.10774194	9.68942048	0.682822
32	0.00949467	8.75046060	0.08308269		32.00000000	1.07312500	9.39033803	0.704213
33	0.01932893	8.75240990	0.16917473		33.00000000	1.04060606	9.10781079	0.725556
34	0.02946240	8.76100440	0.25812024		34.00000000	1.01000000	8.84861444	0.746947
35	0.03927955	8.74602990	0.34354012		35.00000000	0.98114286	8.58110476	0.768439
36	0.04939292	8.76293560	0.43282701		36.00000000	0.95388889	8.35886690	0.789820
37	0.05920040	8.74876690	0.51793046		37.00000000	0.92810811	8.11980150	0.811179
38	0.06934875	8.75149730	0.60690542		38.00000000	0.90368421	7.90858993	0.832555
39	0.07953134	8.75239180	0.69608947		39.00000000	0.88051282	7.70659319	0.854032
40	0.08934328	8.75580600	0.78227243		40.00000000	0.85850000	7.51685945	0.875429
41	0.09950057	8.74389930	0.87002294		41.00000000	0.83756098	7.32354883	0.896779
42	0.10927901	8.75816440	0.95708354		42.00000000	0.81761905	7.16084204	0.918142
43	0.11944076	8.75801370	1.04606381		43.00000000	0.79860465	6.99419048	0.939644
44	0.12928694	8.75085450	1.13137120		44.00000000	0.78045455	6.82964417	0.961026
45	0.13943455	8.75436590	1.22066107		45.00000000	0.76311111	6.68055389	0.982378
46	0.14924277	8.74954610	1.30580650		46.00000000	0.74652174	6.53172637	1.003774
47	0.15941569	8.75494000	1.39567480		47.00000000	0.73063830	6.39669446	1.025254
48	0.16953501	8.74054810	1.48182891		48.00000000	0.71541667	6.25313379	1.046656
49	0.17937970	8.76380160	1.57204810		49.00000000	0.70081633	6.14181524	1.068031
50	0.18950349	8.75135710	1.65841271		50.00000000	0.68680000	6.01043206	1.089389
51	0.19929980	8.75124550	1.74412148		51.00000000	0.67333333	5.89250530	1.110873
52	0.20943104	8.75009540	1.83254158		52.00000000	0.66038462	5.77842839	1.132254
53	0.21928540	8.75265880	1.91933029		53.00000000	0.64792453	5.67106232	1.153639
54	0.22941142	8.75507830	2.00851495		54.00000000	0.63592593	5.56758127	1.174988
55	0.23925313	8.75430390	2.09449461		55.00000000	0.62436364	5.46586902	1.196454
56	0.24940522	8.75220970	2.18284679		56.00000000	0.61321429	5.36698002	1.217833
57	0.25954911	8.74812790	2.27056881		57.00000000	0.60245614	5.27036337	1.239227
58	0.26936477	8.76512340	2.36101545		58.00000000	0.59206897	5.18955754	1.260728
59	0.27951610	8.75374510	2.44681269		59.00000000	0.58203390	5.09497639	1.282105
60	0.28931835	8.73137090	2.52614582		60.00000000	0.57233333	4.99725461	1.303482
61	0.29947490	8.77348900	2.62743974		61.00000000	0.56295082	4.93904282	1.324858
62	0.30928236	8.74219990	2.70380822		62.00000000	0.55387097	4.84205072	1.346336
63	0.31944114	8.74599360	2.79383017		63.00000000	0.54507937	4.76726064	1.367715
64	0.32924491	8.75912860	2.88389851		64.00000000	0.53656250	4.69981994	1.389071
65	0.33942452	8.74057770	2.96676639		65.00000000	0.52830769	4.61771443	1.410453
66	0.34924391	8.74296470	3.05342718		66.00000000	0.52030303	4.54899103	1.431941
67	0.35939077	8.75385000	3.14605289		67.00000000	0.51253731	4.48667476	1.453325
68	0.36951157	8.75211140	3.23400642		68.00000000	0.50500000	4.41981626	1.474692
69	0.37932426	8.73241040	3.31241511		69.00000000	0.49768116	4.34595613	1.496061
70	0.38946295	8.74995040	3.40778150		70.00000000	0.49057143	4.29247567	1.517538
71	0.39931136	8.73764900	3.48904251		71.00000000	0.48366197	4.22606854	1.538921
72	0.40944555	8.75893690	3.58630774		72.00000000	0.47694444	4.17752629	1.560273
73	0.41928282	8.73687840	3.66322301		73.00000000	0.47041096	4.10992335	1.581644
74	0.42943639	8.73984050	3.75320555		74.00000000	0.46405405	4.05575842	1.603139
75	0.43925205	8.74166300	3.83979339		75.00000000	0.45786667	4.00251610	1.624529
76	0.44941899	8.73806000	3.92705010		76.00000000	0.45184211	3.94822343	1.645889
77	0.45954353	8.72795960	4.01087736		77.00000000	0.44597403	3.89244328	1.667264
78	0.46941501	8.72838210	4.09723357		78.00000000	0.44025641	3.84272617	1.688742
79	0.47953954	8.70239350	4.17314178		79.00000000	0.43468354	3.78278725	1.710123
80	0.48936713	8.67905140	4.24724247		80.00000000	0.42925000	3.72548281	1.731483
81	0.49949911	8.65803430	4.32468043		81.00000000	0.42395062	3.67057899	1.752853
82	0.50930655	8.61655520	4.38846800		82.00000000	0.41878049	3.60844519	1.774327
83	0.51947206	8.56165890	4.44754259		83.00000000	0.41373494	3.54225743	1.795703
84	0.52921402	8.47975250	4.48760391		84.00000000	0.40880952	3.46660358	1.817091
85	0.53937501	8.37728310	4.51849716		85.00000000	0.40400000	3.38442237	1.838445
86	0.54950178	8.22550490	4.51992958		86.00000000	0.39930233	3.28446324	1.859930
87	0.55932415	7.99132060	4.46973860		87.00000000	0.39471264	3.15427528	1.881310
88	0.56943905	7.66907600	4.36707135		88.00000000	0.39022727	2.99268261	1.902701
89	0.57925022	7.24762250	4.19818693		89.00000000	0.38584270	2.79644221	1.924197
90	0.58936882	6.65369750	3.92148184		90.00000000	0.38155556	2.53875525	1.945571
91	0.59915394	5.88956590	3.52875661		91.00000000	0.37736264	2.22250212	1.966934
92	0.60927552	4.89902310	2.98485485		92.00000000	0.37326087	1.82861362	1.988414
93	0.61905694	3.65966340	2.26554003		93.00000000	0.36924731	1.35132087	2.009933
94	0.62918890	2.10057640	1.32165935		94.00000000	0.36531915	0.76738078	2.031310
95	0.63920403	0.23782699	0.15201997		95.00000000	0.36147368	0.08596820	2.052689
96	0.64897650	-1.88828440	-1.22545220		96.00000000	0.35770833	-0.67545507	2.074114
97	0.65906608	-4.40551470	-2.90352530		97.00000000	0.35402062	-1.55964304	2.095606
98	0.66889066	-7.19899890	-4.81534313		98.00000000	0.35040816	-2.52258798	2.116979
99	0.67765915	-9.99164390	-6.77092891		99.00000000	0.34686869	-3.46578840	2.138346
100	0.67769408	-10.00023800	-6.77710209		100.00000000	0.34340000	-3.43408173	2.159735
101	0.67763901	-10.00032700	-6.77661169		101.00000000	0.34000000	-3.40011118	2.181220
13:07 02/04/2018
Test Lot:	JK-PERC
Recipe:	Recipe_YJX-LID
Cell Name:	1-0-30min
Test Order:	3
Test Condition:	Light
1	-0.29989740	8.76405620	-2.62831767		1.00000000	34.34000000	300.95768991	0.000000
2	-0.29004213	8.75530620	-2.53940766		2.00000000	17.17000000	150.32860745	0.061792
3	-0.27989957	8.75811670	-2.45139310		3.00000000	11.44666667	100.25124249	0.083226
4	-0.27007931	8.75283150	-2.36395869		4.00000000	8.58500000	75.14305843	0.104716
5	-0.25987870	8.75159170	-2.27435227		5.00000000	6.86800000	60.10593180	0.126104
6	-0.24973764	8.75163360	-2.18561232		6.00000000	5.72333333	50.08851630	0.147457
7	-0.23991662	8.75672150	-2.10088302		7.00000000	4.90571429	42.95797376	0.168826
8	-0.22978151	8.73949430	-2.00817420		8.00000000	4.29250000	37.51427928	0.190345
9	-0.21993445	8.75823210	-1.92623696		9.00000000	3.81555556	33.41752115	0.211731
10	-0.20980677	8.74060250	-1.83383758		10.00000000	3.43400000	30.01522899	0.233081
11	-0.19997758	8.75193690	-1.75019116		11.00000000	3.12181818	27.32195574	0.254459
12	-0.18987447	8.74893190	-1.66119881		12.00000000	2.86166667	25.03652679	0.275936
13	-0.18003261	8.75335220	-1.57588884		13.00000000	2.64153846	23.12231650	0.297303
14	-0.16989750	8.74704550	-1.48610116		14.00000000	2.45285714	21.45525303	0.318693
15	-0.16008839	8.75876430	-1.40217648		15.00000000	2.28933333	20.05173107	0.340043
16	-0.14996073	8.74736790	-1.31176168		16.00000000	2.14625000	18.77403836	0.361512
17	-0.13979658	8.75891970	-1.22446702		17.00000000	2.02000000	17.69301779	0.382900
18	-0.12996961	8.73103140	-1.13476875		18.00000000	1.90777778	16.65686768	0.404278
19	-0.11983822	8.76407150	-1.05027073		19.00000000	1.80736842	15.83990607	0.425640
20	-0.11003210	8.75053690	-0.96283995		20.00000000	1.71700000	15.02467186	0.447111
21	-0.09983967	8.75133610	-0.87373053		21.00000000	1.63523810	14.31051817	0.468480
22	-0.09008192	8.75310040	-0.78849612		22.00000000	1.56090909	13.66279399	0.489864
23	-0.07990216	8.75011830	-0.69915333		23.00000000	1.49304348	13.06430706	0.511347
24	-0.07012059	8.75003150	-0.61355735		24.00000000	1.43083333	12.51983674	0.532724
25	-0.05991849	8.75345420	-0.52449375		25.00000000	1.37360000	12.02374469	0.554081
26	-0.04982208	8.74732300	-0.43580984		26.00000000	1.32076923	11.55319507	0.575455
27	-0.03996683	8.75143150	-0.34976693		27.00000000	1.27185185	11.13052436	0.596932
28	-0.02981385	8.75003150	-0.26087216		28.00000000	1.22642857	10.73128863	0.618322
29	-0.02002038	8.74640660	-0.17510634		29.00000000	1.18413793	10.35695182	0.639672
30	-0.00986294	8.75638960	-0.08636371		30.00000000	1.14466667	10.02314730	0.661046
31	-0.00063959	8.75497150	-0.00559960		31.00000000	1.10774194	9.69824907	0.682650
32	0.00949754	8.75238610	0.08312617		32.00000000	1.07312500	9.39240433	0.704030
33	0.01934656	8.74889180	0.16926099		33.00000000	1.04060606	9.10414983	0.725393
34	0.02947394	8.74640660	0.25779108		34.00000000	1.01000000	8.83387067	0.746769
35	0.03928277	8.73958590	0.34331513		35.00000000	0.98114286	8.57478228	0.768249
36	0.04948532	8.75377270	0.43318326		36.00000000	0.95388889	8.35012651	0.789637
37	0.05930382	8.76136300	0.51958233		37.00000000	0.92810811	8.13149204	0.810981
38	0.06943195	8.74795060	0.60738723		38.00000000	0.90368421	7.90538483	0.832361
39	0.07956975	8.73609160	0.69512862		39.00000000	0.88051282	7.69224065	0.853833
40	0.08941877	8.75650310	0.78299573		40.00000000	0.85850000	7.51745791	0.875212
41	0.09954391	8.75997260	0.87200196		41.00000000	0.83756098	7.33701120	0.896556
42	0.10936167	8.74689200	0.95657472		42.00000000	0.81761905	7.15162551	0.917938
43	0.11949872	8.74277020	1.04474985		43.00000000	0.79860465	6.98201695	0.939427
44	0.12936933	8.76076220	1.13337394		44.00000000	0.78045455	6.83737668	0.960795
45	0.13949597	8.74815370	1.22033219		45.00000000	0.76311111	6.67581329	0.982164
46	0.14931223	8.76292510	1.30841189		46.00000000	0.74652174	6.54171409	1.003528
47	0.15945449	8.74807740	1.39492022		47.00000000	0.73063830	6.39168038	1.024999
48	0.16961537	8.75861450	1.48559564		48.00000000	0.71541667	6.26605879	1.046386
49	0.17945322	8.74270340	1.56890628		49.00000000	0.70081633	6.12702928	1.067759
50	0.18957837	8.75860790	1.66044261		50.00000000	0.68680000	6.01541191	1.089118
51	0.19936636	8.74149990	1.74276102		51.00000000	0.67333333	5.88594327	1.110590
52	0.20947662	8.75312520	1.83357508		52.00000000	0.66038462	5.78042922	1.131964
53	0.21930629	8.74007320	1.91675303		53.00000000	0.64792453	5.66290781	1.153358
54	0.22942920	8.74381830	2.00608724		54.00000000	0.63592593	5.56042075	1.174859
55	0.23928566	8.74914170	2.09354415		55.00000000	0.62436364	5.46264593	1.196231
56	0.24940857	8.74815370	2.18186450		56.00000000	0.61321429	5.36449282	1.217598
57	0.25958136	8.74594590	2.27028453		57.00000000	0.60245614	5.26904881	1.238973
58	0.26938796	8.74580380	2.35601424		58.00000000	0.59206897	5.17811901	1.260450
59	0.27954584	8.73964120	2.44313034		59.00000000	0.58203390	5.08676744	1.281835
60	0.28936508	8.75177860	2.53245911		60.00000000	0.57233333	5.00893462	1.303175
61	0.29952672	8.74493600	2.61934200		61.00000000	0.56295082	4.92296889	1.324558
62	0.30933478	8.74892140	2.70634568		62.00000000	0.55387097	4.84577356	1.346041
63	0.31950235	8.74175740	2.79301203		63.00000000	0.54507937	4.76495157	1.367415
64	0.32930523	8.73928740	2.87789305		64.00000000	0.53656250	4.68917390	1.388773
65	0.33943188	8.75191400	2.97067862		65.00000000	0.52830769	4.62370349	1.410136
66	0.34926376	8.74078270	3.05283863		66.00000000	0.52030303	4.54785573	1.431619
67	0.35940751	8.73857500	3.14070948		67.00000000	0.51253731	4.47884575	1.452995
68	0.36958402	8.74490450	3.23197696		68.00000000	0.50500000	4.41617677	1.474336
69	0.37941220	8.74748330	3.31890188		69.00000000	0.49768116	4.35345763	1.495701
70	0.38954553	8.74886320	3.40808055		70.00000000	0.49057143	4.29194232	1.517191
71	0.39937669	8.73233320	3.48749033		71.00000000	0.48366197	4.22349749	1.538556
72	0.40951598	8.73343660	3.57648185		72.00000000	0.47694444	4.16536407	1.559888
73	0.41933003	8.74882510	3.66864509		73.00000000	0.47041096	4.11554320	1.581261
74	0.42948568	8.73119640	3.74992382		74.00000000	0.46405405	4.05174709	1.602735
75	0.43931982	8.72820280	3.83447248		75.00000000	0.45786667	3.99635312	1.624116
76	0.44946283	8.72362800	3.92094653		76.00000000	0.45184211	3.94170244	1.645488
77	0.45958498	8.73658850	4.01520485		77.00000000	0.44597403	3.89629155	1.666843
78	0.46946973	8.70601370	4.08720990		78.00000000	0.44025641	3.83287834	1.688322
79	0.47960976	8.69587900	4.17062844		79.00000000	0.43468354	3.77995550	1.709706
80	0.48941487	8.68338200	4.24977627		80.00000000	0.42925000	3.72734172	1.731091
81	0.49956086	8.65940570	4.32590016		81.00000000	0.42395062	3.67116039	1.752455
82	0.50936747	8.62185670	4.39169333		82.00000000	0.41878049	3.61066535	1.773925
83	0.51950228	8.55784130	4.44581807		83.00000000	0.41373494	3.54067795	1.795292
84	0.52927387	8.48951820	4.49328015		84.00000000	0.40880952	3.47059589	1.816674
85	0.53940719	8.36751170	4.51349597		85.00000000	0.40400000	3.38047473	1.838147
86	0.54954946	8.19770910	4.50504661		86.00000000	0.39930233	3.27336431	1.859522
87	0.55933076	7.97757770	4.46210460		87.00000000	0.39471264	3.14885078	1.880888
88	0.56948715	7.64915660	4.35609639		88.00000000	0.39022727	2.98490952	1.902263
89	0.57927144	7.20856140	4.17571374		89.00000000	0.38584270	2.78137077	1.923760
90	0.58940327	6.62403770	3.90422948		90.00000000	0.38155556	2.52743838	1.945144
91	0.59920317	5.85660410	3.50929574		91.00000000	0.37736264	2.21006357	1.966488
92	0.60930455	4.84440370	2.95171722		92.00000000	0.37326087	1.80822634	1.987962
93	0.61908656	3.61877870	2.24033726		93.00000000	0.36924731	1.33622431	2.009483
94	0.62919158	2.07487390	1.30549319		94.00000000	0.36531915	0.75799117	2.030869
95	0.63925719	0.22368945	0.14299509		95.00000000	0.36147368	0.08085785	2.052227
96	0.64901763	-1.86398400	-1.20975848		96.00000000	0.35770833	-0.66676261	2.073613
97	0.65908253	-4.32611560	-2.85126721		97.00000000	0.35402062	-1.53153412	2.095084
98	0.66896206	-7.07871150	-4.73538943		98.00000000	0.35040816	-2.48043830	2.116468
99	0.67834145	-9.98519800	-6.77337369		99.00000000	0.34686869	-3.46355252	2.137816
100	0.67834890	-10.00015100	-6.78359143		100.00000000	0.34340000	-3.43405185	2.159181
101	0.67833996	-9.99980740	-6.78326895		101.00000000	0.34000000	-3.39993452	2.180708
13:07 02/04/2018
Test Lot:	JK-PERC
Recipe:	Recipe_YJX-LID
Cell Name:	1-0-30min
Test Order:	4
Test Condition:	Light
1	-0.29985642	8.75698090	-2.62583694		1.00000000	34.34000000	300.71472411	0.000000
2	-0.29005387	8.75414370	-2.53917326		2.00000000	17.17000000	150.30864733	0.061791
3	-0.27989626	8.75886150	-2.45157258		3.00000000	11.44666667	100.25976797	0.083263
4	-0.27011153	8.76085760	-2.36640865		4.00000000	8.58500000	75.21196250	0.104776
5	-0.25998071	8.74691490	-2.27402915		5.00000000	6.86800000	60.07381153	0.126153
6	-0.24982162	8.75484660	-2.18714996		6.00000000	5.72333333	50.10690537	0.147521
7	-0.24000415	8.74189660	-2.09809146		7.00000000	4.90571429	42.88524703	0.168894
8	-0.22982495	8.75190260	-2.01140558		8.00000000	4.29250000	37.56754191	0.190362
9	-0.22003576	8.76082610	-1.92769503		9.00000000	3.81555556	33.42741870	0.211746
10	-0.20987593	8.74780560	-1.83595384		10.00000000	3.43400000	30.03996443	0.233144
11	-0.20002943	8.75121690	-1.75050093		11.00000000	3.12181818	27.31970803	0.254533
12	-0.18989637	8.75206760	-1.66198587		12.00000000	2.86166667	25.04550012	0.276023
13	-0.18009901	8.75222490	-1.57626704		13.00000000	2.64153846	23.11933870	0.297383
14	-0.17000318	8.74221040	-1.48620357		14.00000000	2.45285714	21.44339322	0.318748
15	-0.16013287	8.75166230	-1.40142880		15.00000000	2.28933333	20.03547223	0.340127
16	-0.15000205	8.75850490	-1.31379369		16.00000000	2.14625000	18.79794114	0.361605
17	-0.13985783	8.74796100	-1.22347084		17.00000000	2.02000000	17.67088122	0.382982
18	-0.13002175	8.75940420	-1.13891306		18.00000000	1.90777778	16.71099668	0.404348
19	-0.11986935	8.75095180	-1.04897090		19.00000000	1.80736842	15.81619394	0.425716
20	-0.11005487	8.74685960	-0.96263450		20.00000000	1.71700000	15.01835793	0.447188
21	-0.09988906	8.75741000	-0.87476947		21.00000000	1.63523810	14.32045045	0.468558
22	-0.09005448	8.74387070	-0.78742475		22.00000000	1.56090909	13.64838727	0.489934
23	-0.07993259	8.75211430	-0.69957919		23.00000000	1.49304348	13.06728718	0.511287
24	-0.07008015	8.75661560	-0.61366490		24.00000000	1.43083333	12.52925749	0.532758
25	-0.05993668	8.74960140	-0.52442202		25.00000000	1.37360000	12.01845248	0.554173
26	-0.04980214	8.75311280	-0.43592371		26.00000000	1.32076923	11.56084206	0.575563
27	-0.03995267	8.74995330	-0.34958396		27.00000000	1.27185185	11.12864431	0.597045
28	-0.02984939	8.75054740	-0.26119847		28.00000000	1.22642857	10.73192135	0.618428
29	-0.02003862	8.75053600	-0.17534868		29.00000000	1.18413793	10.36184159	0.639781
30	-0.00987208	8.74780560	-0.08635899		30.00000000	1.14466667	10.01332148	0.661156
31	-0.00064262	8.75392060	-0.00562542		31.00000000	1.10774194	9.69708495	0.682753
32	0.00950437	8.75013350	0.08316449		32.00000000	1.07312500	9.38998701	0.704132
33	0.01933495	8.75235650	0.16922638		33.00000000	1.04060606	9.10775522	0.725482
34	0.02944911	8.74811740	0.25762423		34.00000000	1.01000000	8.83559857	0.746868
35	0.03930127	8.75604150	0.34412357		35.00000000	0.98114286	8.59092757	0.768343
36	0.04944520	8.73607540	0.43195697		36.00000000	0.95388889	8.33324526	0.789727
37	0.05923633	8.75016880	0.51832791		37.00000000	0.92810811	8.12110261	0.811087
38	0.06936090	8.73523430	0.60588375		38.00000000	0.90368421	7.89389331	0.832457
39	0.07952642	8.75979140	0.69663482		39.00000000	0.88051282	7.71310863	0.853936
40	0.08934882	8.75117870	0.78190745		40.00000000	0.85850000	7.51288691	0.875324
41	0.09949423	8.74416450	0.86999388		41.00000000	0.83756098	7.32377095	0.896686
42	0.10932332	8.73918250	0.95539644		42.00000000	0.81761905	7.14532207	0.918071
43	0.11945832	8.76353070	1.04687665		43.00000000	0.79860465	6.99859638	0.939557
44	0.12930304	8.75159360	1.13160766		44.00000000	0.78045455	6.83022101	0.960937
45	0.13945813	8.75080300	1.22037062		45.00000000	0.76311111	6.67783500	0.982289
46	0.14926118	8.74273590	1.30495108		46.00000000	0.74652174	6.52664241	1.003653
47	0.15942371	8.74761010	1.39457646		47.00000000	0.73063830	6.39133895	1.025127
48	0.16954829	8.75087170	1.48369533		48.00000000	0.71541667	6.26051946	1.046515
49	0.17937589	8.74134730	1.56798695		49.00000000	0.70081633	6.12607890	1.067879
50	0.18951982	8.73928930	1.65626854		50.00000000	0.68680000	6.00214389	1.089241
51	0.19930947	8.74720290	1.74340037		51.00000000	0.67333333	5.88978329	1.110712
52	0.20943329	8.76110460	1.83486696		52.00000000	0.66038462	5.78569869	1.132093
53	0.21930183	8.75193790	1.91931600		53.00000000	0.64792453	5.67059524	1.153481
54	0.22944055	8.74628540	2.00675253		54.00000000	0.63592593	5.56198964	1.174846
55	0.23926072	8.74254890	2.09174854		55.00000000	0.62436364	5.45852962	1.196329
56	0.24942325	8.75888820	2.18467036		56.00000000	0.61321429	5.37107537	1.217709
57	0.25954634	8.73877050	2.26811590		57.00000000	0.60245614	5.26472595	1.239088
58	0.26937616	8.74778750	2.35644541		58.00000000	0.59206897	5.17929350	1.260564
59	0.27952904	8.75115680	2.44620246		59.00000000	0.58203390	5.09346991	1.281952
60	0.28932983	8.74858000	2.53122516		60.00000000	0.57233333	5.00710395	1.303293
61	0.29950577	8.74502560	2.61918563		61.00000000	0.56295082	4.92301933	1.324668
62	0.30932444	8.74188140	2.70407757		62.00000000	0.55387097	4.84187431	1.346151
63	0.31948176	8.76125620	2.79906155		63.00000000	0.54507937	4.77557997	1.367523
64	0.32926545	8.74327950	2.87885986		64.00000000	0.53656250	4.69131591	1.388866
65	0.33940119	8.74190140	2.96701174		65.00000000	0.52830769	4.61841376	1.410244
66	0.34923178	8.74515720	3.05408682		66.00000000	0.52030303	4.55013179	1.431731
67	0.35940176	8.74523260	3.14305199		67.00000000	0.51253731	4.48225802	1.453102
68	0.36957842	8.74523260	3.23204925		68.00000000	0.50500000	4.41634246	1.474464
69	0.37939042	8.73945140	3.31566414		69.00000000	0.49768116	4.34946031	1.495833
70	0.38951945	8.74044610	3.40457376		70.00000000	0.49057143	4.28781313	1.517297
71	0.39934558	8.73550610	3.48848575		71.00000000	0.48366197	4.22503211	1.538673
72	0.40949172	8.75457760	3.58492704		72.00000000	0.47694444	4.17544715	1.560014
73	0.41931188	8.73842720	3.66412634		73.00000000	0.47041096	4.11065192	1.581393
74	0.42943946	8.73006250	3.74903333		74.00000000	0.46405405	4.05122090	1.602875
75	0.43927747	8.74423410	3.84114503		75.00000000	0.45786667	4.00369332	1.624250
76	0.44942883	8.71294880	3.91585039		76.00000000	0.45184211	3.93687713	1.645606
77	0.45954373	8.72654340	4.01022830		77.00000000	0.44597403	3.89181169	1.666979
78	0.46943533	8.70745850	4.08758865		78.00000000	0.44025641	3.83351442	1.688452
79	0.47955099	8.69892220	4.17157675		79.00000000	0.43468354	3.78127833	1.709833
80	0.48938307	8.67109110	4.24348518		80.00000000	0.42925000	3.72206585	1.731192
81	0.49951956	8.64656730	4.31912949		81.00000000	0.42395062	3.66571754	1.752547
82	0.50933450	8.61344340	4.38712389		82.00000000	0.41878049	3.60714203	1.774028
83	0.51947767	8.55864330	4.44602408		83.00000000	0.41373494	3.54100977	1.795405
84	0.52925390	8.48886300	4.49276385		84.00000000	0.40880952	3.47032804	1.816797
85	0.53938895	8.35713860	4.50774821		85.00000000	0.40400000	3.37628399	1.838144
86	0.54952765	8.19188790	4.50166891		86.00000000	0.39930233	3.27103989	1.859622
87	0.55934554	7.97936730	4.46322351		87.00000000	0.39471264	3.14955716	1.880999
88	0.56946272	7.65131240	4.35713717		88.00000000	0.39022727	2.98575077	1.902387
89	0.57925236	7.21846490	4.18131283		89.00000000	0.38584270	2.78519196	1.923868
90	0.58939254	6.62235830	3.90316858		90.00000000	0.38155556	2.52679760	1.945258
91	0.59917551	5.86253260	3.51268596		91.00000000	0.37736264	2.21230076	1.966605
92	0.60929191	4.84779690	2.95372343		92.00000000	0.37326087	1.80949289	1.988078
93	0.61907560	3.62575220	2.24461472		93.00000000	0.36924731	1.33879925	2.009581
94	0.62922025	2.06823110	1.30137289		94.00000000	0.36531915	0.75556443	2.030977
95	0.63926148	0.22439228	0.14344534		95.00000000	0.36147368	0.08111190	2.052316
96	0.64902508	-1.88609790	-1.22412484		96.00000000	0.35770833	-0.67467294	2.073710
97	0.65906256	-4.34201910	-2.86166222		97.00000000	0.35402062	-1.53716429	2.095220
98	0.66892588	-7.11030480	-4.75626690		98.00000000	0.35040816	-2.49150885	2.116613
99	0.67824441	-9.98874570	-6.77481093		99.00000000	0.34686869	-3.46478310	2.137975
100	0.67822284	-10.00020300	-6.78236608		100.00000000	0.34340000	-3.43406971	2.159351
101	0.67821759	-10.00002100	-6.78219014		101.00000000	0.34000000	-3.40000714	2.180830
