# Supplementary material for: Study on the Electrical Injection Regeneration of Industrialized B-Doped Czochralski Silicon PERC Solar Cells
Source: Hindawi journal article supplement (doi:10.1155/2019/5357370), 2019-06-20
Supplement: f1 [file 5357370.f1.zip › section3.2/IVRawData_1-0-40min.csv]

13:33 02/04/2018
Test Lot:	JK-PERC
Recipe:	Recipe_YJX-LID
Cell Name:	1-0-40min
Test Order:	2
Test Condition:	Light
1	-0.29992688	8.72825720	-2.61783895		1.00000000	34.34000000	299.72835225	0.000000
2	-0.29009601	8.73496150	-2.53397748		2.00000000	17.17000000	149.97928896	0.061717
3	-0.27993619	8.73625470	-2.44559386		3.00000000	11.44666667	100.00099547	0.083227
4	-0.27009416	8.73166370	-2.35837137		4.00000000	8.58500000	74.96133286	0.104664
5	-0.25994402	8.74327850	-2.27276296		5.00000000	6.86800000	60.04883674	0.126022
6	-0.24978939	8.73031710	-2.18074058		6.00000000	5.72333333	49.96651487	0.147415
7	-0.23997565	8.75360390	-2.10065179		7.00000000	4.90571429	42.94267970	0.168910
8	-0.22982325	8.73105140	-2.00659861		8.00000000	4.29250000	37.47803813	0.190282
9	-0.21999091	8.74005990	-1.92273373		9.00000000	3.81555556	33.34818411	0.211643
10	-0.20987126	8.73793980	-1.83384244		10.00000000	3.43400000	30.00608527	0.233015
11	-0.20006274	8.74346920	-1.74924241		11.00000000	3.12181818	27.29552112	0.254498
12	-0.18990067	8.72797200	-1.65744773		12.00000000	2.86166667	24.97654654	0.275885
13	-0.18010257	8.73910520	-1.57393531		13.00000000	2.64153846	23.08468251	0.297234
14	-0.16997696	8.73457910	-1.48467720		14.00000000	2.45285714	21.42467474	0.318603
15	-0.16015653	8.73682210	-1.39925911		15.00000000	2.28933333	20.00149806	0.340082
16	-0.15000786	8.74604700	-1.31197579		16.00000000	2.14625000	18.77120337	0.361463
17	-0.13986887	8.71875860	-1.21948291		17.00000000	2.02000000	17.61189237	0.382810
18	-0.13004620	8.75079540	-1.13800769		18.00000000	1.90777778	16.69457300	0.404180
19	-0.11989678	8.72382830	-1.04595892		19.00000000	1.80736842	15.76717178	0.425658
20	-0.11009272	8.73780630	-0.96196886		20.00000000	1.71700000	15.00281342	0.447049
21	-0.09992470	8.74134250	-0.87347601		21.00000000	1.63523810	14.29417626	0.468407
22	-0.09009533	8.73262790	-0.78676903		22.00000000	1.56090909	13.63083828	0.489777
23	-0.07995337	8.73804000	-0.69863570		23.00000000	1.49304348	13.04627363	0.511247
24	-0.07013070	8.73436360	-0.61254702		24.00000000	1.43083333	12.49741858	0.532624
25	-0.05997681	8.73031040	-0.52361619		25.00000000	1.37360000	11.99195437	0.553985
26	-0.04983037	8.73988910	-0.43551193		26.00000000	1.32076923	11.54337660	0.575365
27	-0.04000771	8.72760870	-0.34917161		27.00000000	1.27185185	11.10022529	0.596853
28	-0.02983894	8.74878790	-0.26105454		28.00000000	1.22642857	10.72976345	0.618216
29	-0.02001106	8.73255440	-0.17474769		29.00000000	1.18413793	10.34054890	0.639606
30	-0.00987430	8.74372960	-0.08633819		30.00000000	1.14466667	10.00865582	0.660955
31	-0.00065155	8.72606280	-0.00568544		31.00000000	1.10774194	9.66622570	0.682566
32	0.00946119	8.73344610	0.08262881		32.00000000	1.07312500	9.37207935	0.703937
33	0.01926795	8.73791500	0.16836169		33.00000000	1.04060606	9.09272731	0.725318
34	0.02944536	8.72090150	0.25679008		34.00000000	1.01000000	8.80811052	0.746806
35	0.03928412	8.72271540	0.34266418		35.00000000	0.98114286	8.55822991	0.768181
36	0.04938636	8.75003050	0.43213212		36.00000000	0.95388889	8.34655687	0.789524
37	0.05925563	8.72695060	0.51712099		37.00000000	0.92810811	8.09955361	0.810896
38	0.06940923	8.72751330	0.60576997		38.00000000	0.90368421	7.88691597	0.832371
39	0.07955687	8.72664550	0.69426458		39.00000000	0.88051282	7.68392324	0.853757
40	0.08935767	8.73257640	0.78032265		40.00000000	0.85850000	7.49691684	0.875114
41	0.09951498	8.72774700	0.86854160		41.00000000	0.83756098	7.31002029	0.896498
42	0.10931504	8.73678020	0.95506148		42.00000000	0.81761905	7.14335791	0.917977
43	0.11946045	8.72448920	1.04223141		43.00000000	0.79860465	6.96741765	0.939376
44	0.12930515	8.74282170	1.13049187		44.00000000	0.78045455	6.82337494	0.960724
45	0.13940516	8.72759150	1.21667129		45.00000000	0.76311111	6.66012205	0.982105
46	0.14926030	8.74182320	1.30480715		46.00000000	0.74652174	6.52596106	1.003580
47	0.15939231	8.72799870	1.39117587		47.00000000	0.73063830	6.37701011	1.024951
48	0.16954367	8.73885630	1.48161777		48.00000000	0.71541667	6.25192344	1.046306
49	0.17937647	8.73140530	1.56620866		49.00000000	0.70081633	6.11911139	1.067680
50	0.18950328	8.72857280	1.65409318		50.00000000	0.68680000	5.99478380	1.089157
51	0.19928472	8.73425200	1.74060296		51.00000000	0.67333333	5.88106301	1.110545
52	0.20943683	8.72648720	1.82764782		52.00000000	0.66038462	5.76283789	1.131898
53	0.21926963	8.73586560	1.91551002		53.00000000	0.64792453	5.66018160	1.153271
54	0.22940165	8.72655390	2.00188586		54.00000000	0.63592593	5.54944187	1.174750
55	0.23922776	8.72897530	2.08821321		55.00000000	0.62436364	5.45005476	1.196132
56	0.24938580	8.73526480	2.17845100		56.00000000	0.61321429	5.35658916	1.217501
57	0.25951931	8.72782900	2.26504016		57.00000000	0.60245614	5.25813417	1.238865
58	0.26933426	8.73956870	2.35386527		58.00000000	0.59206897	5.17442740	1.260353
59	0.27951688	8.72302250	2.43823203		59.00000000	0.58203390	5.07709479	1.281738
60	0.28933033	8.73357580	2.52688837		60.00000000	0.57233333	4.99851655	1.303118
61	0.29947200	8.74009990	2.61741520		61.00000000	0.56295082	4.92024640	1.324473
62	0.30926985	8.71888730	2.69648897		62.00000000	0.55387097	4.82913855	1.345948
63	0.31946212	8.72192960	2.78632612		63.00000000	0.54507937	4.75414385	1.367320
64	0.32926518	8.74217890	2.87849511		64.00000000	0.53656250	4.69072537	1.388697
65	0.33940610	8.71593000	2.95823981		65.00000000	0.52830769	4.60469286	1.410182
66	0.34924114	8.72332100	3.04654257		66.00000000	0.52030303	4.53877035	1.431552
67	0.35937986	8.72624680	3.13603735		67.00000000	0.51253731	4.47252709	1.452907
68	0.36953568	8.73398490	3.22751905		68.00000000	0.50500000	4.41066237	1.474287
69	0.37935954	8.72974780	3.31171311		69.00000000	0.49768116	4.34463101	1.495771
70	0.38951093	8.72082420	3.39685634		70.00000000	0.49057143	4.27818719	1.517137
71	0.39934373	8.72748660	3.48526705		71.00000000	0.48366197	4.22115338	1.538499
72	0.40949360	8.72177220	3.57150990		72.00000000	0.47694444	4.15980080	1.559875
73	0.41929364	8.71780400	3.65531977		73.00000000	0.47041096	4.10095054	1.581387
74	0.42945096	8.71579930	3.74300838		74.00000000	0.46405405	4.04460200	1.602768
75	0.43926516	8.70784760	3.82505407		75.00000000	0.45786667	3.98703315	1.624117
76	0.44941950	8.69938180	3.90967182		76.00000000	0.45184211	3.93074699	1.645503
77	0.45956787	8.71086690	4.00323455		77.00000000	0.44597403	3.88482038	1.666983
78	0.46941110	8.69494720	4.08150473		78.00000000	0.44025641	3.82800624	1.688379
79	0.47955653	8.67732810	4.16126935		79.00000000	0.43468354	3.77189173	1.709731
80	0.48938933	8.67034720	4.24317541		80.00000000	0.42925000	3.72174654	1.731104
81	0.49949899	8.62459950	4.30797874		81.00000000	0.42395062	3.65640428	1.752585
82	0.50931472	8.58130170	4.37058327		82.00000000	0.41878049	3.59368171	1.773969
83	0.51946533	8.53867820	4.43554729		83.00000000	0.41373494	3.53274951	1.795320
84	0.52920508	8.46191120	4.47808639		84.00000000	0.40880952	3.45930989	1.816690
85	0.53935122	8.33343790	4.49464990		85.00000000	0.40400000	3.36670891	1.838176
86	0.54951447	8.16383270	4.48614420		86.00000000	0.39930233	3.25983738	1.859553
87	0.55930489	7.92771910	4.43401206		87.00000000	0.39471264	3.12917096	1.880908
88	0.56945550	7.59734770	4.32635143		88.00000000	0.39022727	2.96469227	1.902275
89	0.57923841	7.15480090	4.14433550		89.00000000	0.38584270	2.76062767	1.923751
90	0.58934963	6.52242370	3.84398799		90.00000000	0.38155556	2.48866700	1.945142
91	0.59913701	5.75376080	3.44729104		91.00000000	0.37736264	2.17125435	1.966524
92	0.60930324	4.70026730	2.86388809		92.00000000	0.37326087	1.75442586	1.987973
93	0.61902666	3.43213080	2.12458047		93.00000000	0.36924731	1.26730507	2.009465
94	0.62917727	1.83664330	1.15557422		94.00000000	0.36531915	0.67096097	2.030837
95	0.63919836	-0.07496794	-0.04791939		95.00000000	0.36147368	-0.02709894	2.052224
96	0.64900512	-2.23129250	-1.44812026		96.00000000	0.35770833	-0.79815192	2.073717
97	0.65905601	-4.78840260	-3.15582551		97.00000000	0.35402062	-1.69519325	2.095116
98	0.66895431	-7.63003590	-5.10414540		98.00000000	0.35040816	-2.67362687	2.116514
99	0.67640316	-9.99528220	-6.76084047		99.00000000	0.34686869	-3.46705041	2.137900
100	0.67639649	-10.00027900	-6.76415361		100.00000000	0.34340000	-3.43409581	2.159389
101	0.67637861	-10.00005500	-6.76382330		101.00000000	0.34000000	-3.40001870	2.180752
13:33 02/04/2018
Test Lot:	JK-PERC
Recipe:	Recipe_YJX-LID
Cell Name:	1-0-40min
Test Order:	3
Test Condition:	Light
1	-0.29989278	8.72473340	-2.61648455		1.00000000	34.34000000	299.60734496	0.000000
2	-0.29007918	8.75070760	-2.53839809		2.00000000	17.17000000	150.24964949	0.061789
3	-0.27992022	8.73169420	-2.44417776		3.00000000	11.44666667	99.94879294	0.083205
4	-0.27008209	8.72594450	-2.35672133		4.00000000	8.58500000	74.91223353	0.104686
5	-0.25994620	8.74036880	-2.27202566		5.00000000	6.86800000	60.02885292	0.126073
6	-0.24981107	8.73619840	-2.18239907		6.00000000	5.72333333	50.00017551	0.147470
7	-0.23999822	8.71983050	-2.09274380		7.00000000	4.90571429	42.77699705	0.168861
8	-0.22979760	8.74208260	-2.00890960		8.00000000	4.29250000	37.52538956	0.190347
9	-0.22000708	8.72338960	-1.91920747		9.00000000	3.81555556	33.28457765	0.211721
10	-0.20985110	8.73244190	-1.83251254		10.00000000	3.43400000	29.98720548	0.233081
11	-0.20003974	8.73260210	-1.74686745		11.00000000	3.12181818	27.26159601	0.254462
12	-0.18988526	8.73330970	-1.65832678		12.00000000	2.86166667	24.99182126	0.275942
13	-0.18008061	8.72902870	-1.57192881		13.00000000	2.64153846	23.05806504	0.297301
14	-0.16995962	8.73213100	-1.48410967		14.00000000	2.45285714	21.41866990	0.318665
15	-0.16011922	8.74746990	-1.40063806		15.00000000	2.28933333	20.02587442	0.340030
16	-0.14998931	8.73234180	-1.30975792		16.00000000	2.14625000	18.74178859	0.361506
17	-0.13983929	8.72425750	-1.21999397		17.00000000	2.02000000	17.62300015	0.382885
18	-0.13000113	8.73343470	-1.13535638		18.00000000	1.90777778	16.66145264	0.404262
19	-0.11990545	8.73050120	-1.04683468		19.00000000	1.80736842	15.77923217	0.425609
20	-0.11005390	8.72940640	-0.96070522		20.00000000	1.71700000	14.98839079	0.447092
21	-0.09990239	8.73651220	-0.87279846		21.00000000	1.63523810	14.28627757	0.468455
22	-0.09008285	8.71699140	-0.78525140		22.00000000	1.56090909	13.60643112	0.489842
23	-0.07994102	8.73701760	-0.69844609		23.00000000	1.49304348	13.04474715	0.511317
24	-0.07011700	8.72869210	-0.61202974		24.00000000	1.43083333	12.48930361	0.532696
25	-0.05994987	8.73898220	-0.52390086		25.00000000	1.37360000	12.00386595	0.554055
26	-0.04981176	8.72055910	-0.43438641		26.00000000	1.32076923	11.51784613	0.575428
27	-0.04002124	8.74239440	-0.34988150		27.00000000	1.27185185	11.11903051	0.596898
28	-0.02984667	8.73019410	-0.26056718		28.00000000	1.22642857	10.70695948	0.618287
29	-0.02001521	8.72479530	-0.17462861		29.00000000	1.18413793	10.33136106	0.639641
30	-0.00988454	8.73221970	-0.08631402		30.00000000	1.14466667	9.99548082	0.661022
31	-0.00065374	8.72223470	-0.00570206		31.00000000	1.10774194	9.66198515	0.682616
32	0.00945886	8.72235870	0.08250353		32.00000000	1.07312500	9.36018118	0.703992
33	0.01929971	8.73013020	0.16848895		33.00000000	1.04060606	9.08462640	0.725356
34	0.02944348	8.72729970	0.25696207		34.00000000	1.01000000	8.81457270	0.746734
35	0.03926870	8.73322300	0.34294233		35.00000000	0.98114286	8.56853937	0.768215
36	0.04942885	8.72922610	0.43147558		36.00000000	0.95388889	8.32671179	0.789601
37	0.05927491	8.72752000	0.51732295		37.00000000	0.92810811	8.10008208	0.810943
38	0.06939412	8.72851180	0.60570739		38.00000000	0.90368421	7.88781830	0.832310
39	0.07954087	8.73166080	0.69452391		39.00000000	0.88051282	7.68833928	0.853799
40	0.08937279	8.73193070	0.78039702		40.00000000	0.85850000	7.49636251	0.875165
41	0.09950987	8.72661400	0.86838418		41.00000000	0.83756098	7.30907134	0.896511
42	0.10933360	8.73714920	0.95526398		42.00000000	0.81761905	7.14365961	0.917889
43	0.11947886	8.71947480	1.04179291		43.00000000	0.79860465	6.96341313	0.939369
44	0.12931822	8.73520850	1.12962161		44.00000000	0.78045455	6.81743318	0.960748
45	0.13943297	8.71812630	1.21559424		45.00000000	0.76311111	6.65289905	0.982114
46	0.14929242	8.73494530	1.30406112		46.00000000	0.74652174	6.52082656	1.003471
47	0.15942504	8.72373680	1.39078209		47.00000000	0.73063830	6.37389621	1.024943
48	0.16957551	8.74457930	1.48286649		48.00000000	0.71541667	6.25601777	1.046308
49	0.17937766	8.72723010	1.56547011		49.00000000	0.70081633	6.11618534	1.067681
50	0.18951398	8.72454170	1.65342262		50.00000000	0.68680000	5.99201524	1.089039
51	0.19927520	8.73194410	1.74005991		51.00000000	0.67333333	5.87950903	1.110514
52	0.20944650	8.72651390	1.82773779		52.00000000	0.66038462	5.76285553	1.131888
53	0.21927248	8.72724820	1.91364536		53.00000000	0.64792453	5.65459817	1.153275
54	0.22940509	8.72637180	2.00187411		54.00000000	0.63592593	5.54932607	1.174749
55	0.23924147	8.73254010	2.08918573		55.00000000	0.62436364	5.45228049	1.196126
56	0.24939120	8.73295210	2.17792140		56.00000000	0.61321429	5.35517098	1.217488
57	0.25954911	8.72854800	2.26548686		57.00000000	0.60245614	5.25856734	1.238864
58	0.26937583	8.73758030	2.35369295		58.00000000	0.59206897	5.17325013	1.260334
59	0.27953300	8.71647930	2.43654361		59.00000000	0.58203390	5.07328643	1.281710
60	0.28933737	8.72323610	2.52395819		60.00000000	0.57233333	4.99259879	1.303049
61	0.29947221	8.72501850	2.61290057		61.00000000	0.56295082	4.91175632	1.324425
62	0.30926618	8.73235130	2.70062093		62.00000000	0.55387097	4.83659587	1.345912
63	0.31944716	8.72371200	2.78676502		63.00000000	0.54507937	4.75511540	1.367294
64	0.32926568	8.72272210	2.87209302		64.00000000	0.53656250	4.68028558	1.388653
65	0.33940500	8.73468780	2.96459671		65.00000000	0.52830769	4.61460275	1.410026
66	0.34923095	8.71060940	3.04201440		66.00000000	0.52030303	4.53215647	1.431508
67	0.35939631	8.73084450	3.13783330		67.00000000	0.51253731	4.47488358	1.452898
68	0.36954975	8.71816640	3.22179621		68.00000000	0.50500000	4.40267403	1.474243
69	0.37937647	8.73239990	3.31286705		69.00000000	0.49768116	4.34595091	1.495617
70	0.38951430	8.71459010	3.39445746		70.00000000	0.49057143	4.27512891	1.517113
71	0.39933580	8.71901890	3.48181639		71.00000000	0.48366197	4.21705787	1.538482
72	0.40950561	8.72730350	3.57387974		72.00000000	0.47694444	4.16243892	1.559840
73	0.41928992	8.71297650	3.65326322		73.00000000	0.47041096	4.09867963	1.581214
74	0.42945600	8.71929650	3.74455420		74.00000000	0.46405405	4.04622489	1.602681
75	0.43927303	8.71206470	3.82697506		75.00000000	0.45786667	3.98896402	1.624069
76	0.44942054	8.71211810	3.91540482		76.00000000	0.45184211	3.93650178	1.645434
77	0.45955241	8.70716670	4.00139944		77.00000000	0.44597403	3.88317019	1.666792
78	0.46942601	8.68367480	4.07634281		78.00000000	0.44025641	3.82304350	1.688258
79	0.47957870	8.68163200	4.16352579		79.00000000	0.43468354	3.77376257	1.709622
80	0.48939797	8.64717670	4.23191072		80.00000000	0.42925000	3.71180060	1.731019
81	0.49951270	8.62032990	4.30596426		81.00000000	0.42395062	3.65459418	1.752373
82	0.50934166	8.57706640	4.36865724		82.00000000	0.41878049	3.59190805	1.773851
83	0.51946533	8.53174690	4.43194672		83.00000000	0.41373494	3.52988179	1.795216
84	0.52924365	8.43493840	4.46413759		84.00000000	0.40880952	3.44828315	1.816607
85	0.53937256	8.33203220	4.49406954		85.00000000	0.40400000	3.36614101	1.838091
86	0.54950142	8.15304950	4.48011228		86.00000000	0.39930233	3.25553163	1.859472
87	0.55931175	7.92908290	4.43482923		87.00000000	0.39471264	3.12970927	1.880832
88	0.56942654	7.58250950	4.31768215		88.00000000	0.39022727	2.95890200	1.902200
89	0.57923019	7.12891050	4.12928018		89.00000000	0.38584270	2.75063805	1.923686
90	0.58935755	6.51516010	3.83975879		90.00000000	0.38155556	2.48589553	1.945061
91	0.59913439	5.72453020	3.42976291		91.00000000	0.37736264	2.16022381	1.966402
92	0.60925734	4.70109890	2.86417901		92.00000000	0.37326087	1.75473626	1.987876
93	0.61905503	3.41489050	2.11400514		93.00000000	0.36924731	1.26093914	2.009372
94	0.62917197	1.82145990	1.14601151		94.00000000	0.36531915	0.66541418	2.030748
95	0.63920486	-0.08783135	-0.05614222		95.00000000	0.36147368	-0.03174872	2.052103
96	0.64900184	-2.22485160	-1.44393278		96.00000000	0.35770833	-0.79584796	2.073476
97	0.65905851	-4.78635120	-3.15448549		97.00000000	0.35402062	-1.69446701	2.094951
98	0.66891277	-7.59853600	-5.08275776		98.00000000	0.35040816	-2.66258904	2.116348
99	0.67650068	-9.99499800	-6.76162294		99.00000000	0.34686869	-3.46695183	2.137754
100	0.67647314	-9.99992080	-6.76467782		100.00000000	0.34340000	-3.43397280	2.159144
101	0.67648727	-9.99984070	-6.76476494		101.00000000	0.34000000	-3.39994584	2.180639
13:33 02/04/2018
Test Lot:	JK-PERC
Recipe:	Recipe_YJX-LID
Cell Name:	1-0-40min
Test Order:	4
Test Condition:	Light
1	-0.29990682	8.71494580	-2.61367168		1.00000000	34.34000000	299.27123877	0.000000
2	-0.29008135	8.73019220	-2.53246594		2.00000000	17.17000000	149.89740007	0.061737
3	-0.27997825	8.74092670	-2.44726936		3.00000000	11.44666667	100.05447429	0.083144
4	-0.27015054	8.72814460	-2.35791298		4.00000000	8.58500000	74.93112139	0.104650
5	-0.25995886	8.72671790	-2.26858764		5.00000000	6.86800000	59.93509854	0.126035
6	-0.24981111	8.73778920	-2.18279682		6.00000000	5.72333333	50.00928019	0.147420
7	-0.23998861	8.73097040	-2.09533345		7.00000000	4.90571429	42.83164622	0.168789
8	-0.22987063	8.72631930	-2.00592452		8.00000000	4.29250000	37.45772560	0.190304
9	-0.22002208	8.73839950	-1.92264083		9.00000000	3.81555556	33.34184876	0.211704
10	-0.20988549	8.72510240	-1.83127239		10.00000000	3.43400000	29.96200164	0.233102
11	-0.20004365	8.72849370	-1.74607974		11.00000000	3.12181818	27.24877033	0.254440
12	-0.18993236	8.74020200	-1.66004719		12.00000000	2.86166667	25.01154472	0.275919
13	-0.18011060	8.72591880	-1.57163047		13.00000000	2.64153846	23.04985012	0.297290
14	-0.16997699	8.72614860	-1.48324447		14.00000000	2.45285714	21.40399592	0.318679
15	-0.16012695	8.73446270	-1.39862287		15.00000000	2.28933333	19.99609661	0.340157
16	-0.15000972	8.72467330	-1.30878580		16.00000000	2.14625000	18.72533007	0.361534
17	-0.13985899	8.74882320	-1.22360158		17.00000000	2.02000000	17.67262286	0.382877
18	-0.13002235	8.71582890	-1.13325256		18.00000000	1.90777778	16.62786469	0.404255
19	-0.11987757	8.74499700	-1.04832899		19.00000000	1.80736842	15.80543142	0.425734
20	-0.11004614	8.73367880	-0.96110764		20.00000000	1.71700000	14.99572650	0.447134
21	-0.09987903	8.73162080	-0.87210585		21.00000000	1.63523810	14.27827897	0.468481
22	-0.09008185	8.71596530	-0.78515026		22.00000000	1.56090909	13.60482947	0.489848
23	-0.07990432	8.74046900	-0.69840121		23.00000000	1.49304348	13.04990024	0.511332
24	-0.07010490	8.72923950	-0.61196244		24.00000000	1.43083333	12.49008685	0.532717
25	-0.05993183	8.72407630	-0.52284988		25.00000000	1.37360000	11.98339121	0.554069
26	-0.04980864	8.72668270	-0.43466420		26.00000000	1.32076923	11.52593400	0.575447
27	-0.03997796	8.72917750	-0.34897468		27.00000000	1.27185185	11.10222057	0.596924
28	-0.02981829	8.73089030	-0.26034025		28.00000000	1.22642857	10.70781332	0.618397
29	-0.02001292	8.72319320	-0.17457652		29.00000000	1.18413793	10.32946395	0.639749
30	-0.00987856	8.73233030	-0.08626282		30.00000000	1.14466667	9.99560742	0.661130
31	-0.00066043	8.73485370	-0.00576875		31.00000000	1.10774194	9.67596374	0.682722
32	0.00949903	8.73041920	0.08293048		32.00000000	1.07312500	9.36883110	0.704103
33	0.01930785	8.72613050	0.16848278		33.00000000	1.04060606	9.08046428	0.725447
34	0.02945755	8.73743340	0.25738334		34.00000000	1.01000000	8.82480773	0.746826
35	0.03923436	8.73154450	0.34257659		35.00000000	0.98114286	8.56689252	0.768312
36	0.04944211	8.72831340	0.43154625		36.00000000	0.95388889	8.32584117	0.789687
37	0.05924051	8.71833520	0.51647865		37.00000000	0.92810811	8.09155759	0.811060
38	0.06938947	8.72810270	0.60563842		38.00000000	0.90368421	7.88744860	0.832423
39	0.07950717	8.72505570	0.69370444		39.00000000	0.88051282	7.68252340	0.853895
40	0.08934575	8.72489550	0.77953236		40.00000000	0.85850000	7.49032279	0.875281
41	0.09947610	8.73224350	0.86864952		41.00000000	0.83756098	7.31378639	0.896672
42	0.10932214	8.72267250	0.95358122		42.00000000	0.81761905	7.13182318	0.918015
43	0.11947630	8.73641400	1.04379442		43.00000000	0.79860465	6.97694085	0.939506
44	0.12929629	8.72426130	1.12801462		44.00000000	0.78045455	6.80888939	0.960875
45	0.13943110	8.72420600	1.21642564		45.00000000	0.76311111	6.65753853	0.982266
46	0.14924364	8.73013590	1.30291726		46.00000000	0.74652174	6.51723623	1.003746
47	0.15940823	8.72251030	1.39043993		47.00000000	0.73063830	6.37300008	1.025133
48	0.16956760	8.73175430	1.48062262		48.00000000	0.71541667	6.24684256	1.046501
49	0.17937493	8.72564320	1.56516164		49.00000000	0.70081633	6.11507321	1.067870
50	0.18950230	8.72254560	1.65294245		50.00000000	0.68680000	5.99064432	1.089354
51	0.19928804	8.72500900	1.73878994		51.00000000	0.67333333	5.87483939	1.110744
52	0.20943774	8.73585800	1.82961836		52.00000000	0.66038462	5.76902623	1.132091
53	0.21927559	8.72632220	1.91346945		53.00000000	0.64792453	5.65399820	1.153465
54	0.22941710	8.72617240	2.00193317		54.00000000	0.63592593	5.54919926	1.174948
55	0.23923634	8.72444150	2.08720345		55.00000000	0.62436364	5.44722402	1.196329
56	0.24939571	8.72888370	2.17694615		56.00000000	0.61321429	5.35267618	1.217720
57	0.25953871	8.72976020	2.26571070		57.00000000	0.60245614	5.25929764	1.239157
58	0.26937434	8.72373870	2.34995135		58.00000000	0.59206897	5.16505495	1.260655
59	0.27948532	8.72585200	2.43874754		59.00000000	0.58203390	5.07874166	1.282057
60	0.28934401	8.73739340	2.52811244		60.00000000	0.57233333	5.00070149	1.303406
61	0.29947883	8.71877100	2.61108734		61.00000000	0.56295082	4.90823928	1.324789
62	0.30931148	8.71042350	2.69423398		62.00000000	0.55387097	4.82445069	1.346270
63	0.31941798	8.73164080	2.78904307		63.00000000	0.54507937	4.75943722	1.367641
64	0.32926551	8.71707820	2.87023320		64.00000000	0.53656250	4.67725727	1.388975
65	0.33938545	8.73000720	2.96283742		65.00000000	0.52830769	4.61212996	1.410356
66	0.34920171	8.71581840	3.04357869		66.00000000	0.52030303	4.53486673	1.431829
67	0.35935512	8.72519780	3.13544450		67.00000000	0.51253731	4.47198944	1.453205
68	0.36953089	8.73264030	3.22698034		68.00000000	0.50500000	4.40998335	1.474571
69	0.37935162	8.71677780	3.30672378		69.00000000	0.49768116	4.33817608	1.495934
70	0.38947228	8.72433660	3.39788727		70.00000000	0.49057143	4.27991027	1.517422
71	0.39930344	8.72662640	3.48457194		71.00000000	0.48366197	4.22073733	1.538810
72	0.40944120	8.71453190	3.56808840		72.00000000	0.47694444	4.15634758	1.560193
73	0.41927609	8.71918960	3.65574772		73.00000000	0.47041096	4.10160234	1.581560
74	0.42941537	8.71481420	3.74227516		74.00000000	0.46405405	4.04414486	1.603031
75	0.43923461	8.69961740	3.82117306		75.00000000	0.45786667	3.98326482	1.624399
76	0.44939697	8.69947050	3.90951568		76.00000000	0.45184211	3.93078707	1.645788
77	0.45952508	8.70085240	3.99825990		77.00000000	0.44597403	3.88035417	1.667282
78	0.46938375	8.68356610	4.07592482		78.00000000	0.44025641	3.82299564	1.688667
79	0.47954088	8.67787360	4.16139514		79.00000000	0.43468354	3.77212885	1.710040
80	0.48937353	8.66410260	4.23998247		80.00000000	0.42925000	3.71906604	1.731411
81	0.49949867	8.62362100	4.30748722		81.00000000	0.42395062	3.65598945	1.752884
82	0.50932389	8.58806420	4.37410627		82.00000000	0.41878049	3.59651371	1.774283
83	0.51945794	8.52833270	4.43011014		83.00000000	0.41373494	3.52846922	1.795627
84	0.52920723	8.43533710	4.46404138		84.00000000	0.40880952	3.44844614	1.816991
85	0.53934652	8.32478430	4.48994344		85.00000000	0.40400000	3.36321286	1.838474
86	0.54949099	8.16316030	4.48558303		86.00000000	0.39930233	3.25956889	1.859857
87	0.55930054	7.91465040	4.42666824		87.00000000	0.39471264	3.12401258	1.881217
88	0.56944132	7.58978180	4.32193537		88.00000000	0.39022727	2.96173985	1.902593
89	0.57923824	7.14003610	4.13578194		89.00000000	0.38584270	2.75493078	1.924072
90	0.58936262	6.52580020	3.84606270		90.00000000	0.38155556	2.48995532	1.945459
91	0.59913570	5.72912790	3.43252505		91.00000000	0.37736264	2.16195881	1.966801
92	0.60927945	4.68685200	2.85560261		92.00000000	0.37326087	1.74941845	1.988274
93	0.61905479	3.42370390	2.11946030		93.00000000	0.36924731	1.26419346	2.009776
94	0.62917322	1.81493530	1.14190869		94.00000000	0.36531915	0.66303062	2.031184
95	0.63918674	-0.08744839	-0.05589585		95.00000000	0.36147368	-0.03161029	2.052521
96	0.64893746	-2.24244830	-1.45520870		96.00000000	0.35770833	-0.80214244	2.073905
97	0.65899712	-4.79965160	-3.16295658		97.00000000	0.35402062	-1.69917563	2.095398
98	0.66892278	-7.63168670	-5.10500908		98.00000000	0.35040816	-2.67420532	2.116777
99	0.67637080	-9.99535750	-6.76056795		99.00000000	0.34686869	-3.46707653	2.138161
100	0.67635512	-10.00026900	-6.76373314		100.00000000	0.34340000	-3.43409237	2.159534
101	0.67630750	-10.00028200	-6.76326572		101.00000000	0.34000000	-3.40009588	2.181047
