# Supplementary material for: Study on the Electrical Injection Regeneration of Industrialized B-Doped Czochralski Silicon PERC Solar Cells
Source: Hindawi journal article supplement (doi:10.1155/2019/5357370), 2019-06-20
Supplement: f1 [file 5357370.f1.zip › section3.2/IVRawData_1-0-50min.csv]

13:49 02/04/2018
Test Lot:	JK-PERC
Recipe:	Recipe_YJX-LID
Cell Name:	1-0-50min
Test Order:	2
Test Condition:	Light
1	-0.29995221	8.70361520	-2.61066861		1.00000000	34.34000000	298.88214597	0.000000
2	-0.29011780	8.71059130	-2.52709758		2.00000000	17.17000000	149.56085262	0.061783
3	-0.27998343	8.72491360	-2.44283124		3.00000000	11.44666667	99.87117767	0.083219
4	-0.27015349	8.72190570	-2.35625326		4.00000000	8.58500000	74.87756043	0.104715
5	-0.26001987	8.72060970	-2.26753180		5.00000000	6.86800000	59.89314742	0.126090
6	-0.24990340	8.71564100	-2.17806832		6.00000000	5.72333333	49.88251866	0.147447
7	-0.24007122	8.73188400	-2.09627404		7.00000000	4.90571429	42.83612808	0.168822
8	-0.22993760	8.70126530	-2.00074806		8.00000000	4.29250000	37.35018130	0.190339
9	-0.22008608	8.73018840	-1.92139294		9.00000000	3.81555556	33.31051885	0.211720
10	-0.20997852	8.71937940	-1.83088238		10.00000000	3.43400000	29.94234886	0.233072
11	-0.20012179	8.71188260	-1.74343754		11.00000000	3.12181818	27.19691350	0.254453
12	-0.18999115	8.73010160	-1.65864204		12.00000000	2.86166667	24.98264075	0.275942
13	-0.18019991	8.71986200	-1.57131835		13.00000000	2.64153846	23.03385085	0.297313
14	-0.17003578	8.73315430	-1.48494870		14.00000000	2.45285714	21.42117990	0.318699
15	-0.16021553	8.71310620	-1.39597493		15.00000000	2.28933333	19.94720446	0.340043
16	-0.15007447	8.71332450	-1.30764756		16.00000000	2.14625000	18.70097271	0.361517
17	-0.13990736	8.71280100	-1.21898499		17.00000000	2.02000000	17.59985802	0.382910
18	-0.13010868	8.71606350	-1.13403552		18.00000000	1.90777778	16.62831226	0.404291
19	-0.11997209	8.71346000	-1.04537201		19.00000000	1.80736842	15.74843244	0.425676
20	-0.11014736	8.72322750	-0.96084048		20.00000000	1.71700000	14.97778162	0.447139
21	-0.09998844	8.71601490	-0.87150072		21.00000000	1.63523810	14.25275960	0.468515
22	-0.09014361	8.71455960	-0.78556190		22.00000000	1.56090909	13.60263530	0.489900
23	-0.07999066	8.72579100	-0.69798174		23.00000000	1.49304348	13.02798535	0.511389
24	-0.07019272	8.70275400	-0.61086995		24.00000000	1.43083333	12.45219052	0.532759
25	-0.06004868	8.71669770	-0.52342623		25.00000000	1.37360000	11.97325596	0.554115
26	-0.04988530	8.72095010	-0.43504720		26.00000000	1.32076923	11.51836256	0.575496
27	-0.04005759	8.70470140	-0.34868938		27.00000000	1.27185185	11.07109060	0.596967
28	-0.02990537	8.73880480	-0.26133722		28.00000000	1.22642857	10.71751989	0.618361
29	-0.02008511	8.71306800	-0.17500292		29.00000000	1.18413793	10.31747431	0.639701
30	-0.00995001	8.72079280	-0.08677196		30.00000000	1.14466667	9.98240083	0.661074
31	-0.00067234	8.71771240	-0.00586125		31.00000000	1.10774194	9.65697561	0.682676
32	0.00943055	8.71941280	0.08222888		32.00000000	1.07312500	9.35701986	0.704055
33	0.01929668	8.72158240	0.16829760		33.00000000	1.04060606	9.07573150	0.725415
34	0.02940768	8.71675780	0.25633959		34.00000000	1.01000000	8.80392538	0.746790
35	0.03925967	8.71541600	0.34216431		35.00000000	0.98114286	8.55106816	0.768279
36	0.04937140	8.71816640	0.43042811		36.00000000	0.95388889	8.31616206	0.789649
37	0.05920181	8.71380230	0.51587284		37.00000000	0.92810811	8.08735057	0.811012
38	0.06933439	8.72503850	0.60494520		38.00000000	0.90368421	7.88467953	0.832396
39	0.07945655	8.71967510	0.69283526		39.00000000	0.88051282	7.67778572	0.853862
40	0.08930035	8.71241660	0.77802184		40.00000000	0.85850000	7.47960965	0.875234
41	0.09946047	8.71762370	0.86705893		41.00000000	0.83756098	7.30154141	0.896576
42	0.10926259	8.69974330	0.95055649		42.00000000	0.81761905	7.11307583	0.917948
43	0.11943685	8.72400860	1.04196811		43.00000000	0.79860465	6.96703384	0.939447
44	0.12924120	8.71254730	1.12602007		44.00000000	0.78045455	6.79974714	0.960828
45	0.13942067	8.70935440	1.21426403		45.00000000	0.76311111	6.64620511	0.982246
46	0.14922799	8.71874710	1.30108111		46.00000000	0.74652174	6.50873425	1.003600
47	0.15937620	8.71402930	1.38880888		47.00000000	0.73063830	6.36680354	1.025074
48	0.16953334	8.72903730	1.47986285		48.00000000	0.71541667	6.24489877	1.046464
49	0.17931537	8.71033380	1.56189673		49.00000000	0.70081633	6.10434414	1.067845
50	0.18950377	8.71952150	1.65238220		50.00000000	0.68680000	5.98856737	1.089193
51	0.19925603	8.70972630	1.73546548		51.00000000	0.67333333	5.86454904	1.110672
52	0.20939381	8.71202280	1.82424365		52.00000000	0.66038462	5.75328583	1.132044
53	0.21922348	8.72144700	1.91194596		53.00000000	0.64792453	5.65083943	1.153427
54	0.22936499	8.70511910	1.99664956		54.00000000	0.63592593	5.53581092	1.174919
55	0.23920432	8.73281000	2.08892588		55.00000000	0.62436364	5.45244901	1.196289
56	0.24936965	8.70440290	2.17061390		56.00000000	0.61321429	5.33766421	1.217656
57	0.25951934	8.72683720	2.26478303		57.00000000	0.60245614	5.25753666	1.239035
58	0.26931924	8.71502880	2.34712493		58.00000000	0.59206897	5.15989809	1.260514
59	0.27950764	8.71509360	2.43593524		59.00000000	0.58203390	5.07247990	1.281907
60	0.28929785	8.71420100	2.52099961		60.00000000	0.57233333	4.98742771	1.303258
61	0.29944012	8.70708180	2.60724962		61.00000000	0.56295082	4.90165884	1.324631
62	0.30927572	8.70625880	2.69263446		62.00000000	0.55387097	4.82214399	1.346121
63	0.31939861	8.71780870	2.78445598		63.00000000	0.54507937	4.75189763	1.367528
64	0.32925731	8.71237370	2.86861273		64.00000000	0.53656250	4.67473301	1.388874
65	0.33939138	8.70654110	2.95492500		65.00000000	0.52830769	4.59973264	1.410256
66	0.34923369	8.71324440	3.04295849		66.00000000	0.52030303	4.53352747	1.431730
67	0.35937074	8.70940490	3.12990528		67.00000000	0.51253731	4.46389499	1.453121
68	0.36952341	8.71238040	3.21942851		68.00000000	0.50500000	4.39975210	1.474469
69	0.37935975	8.72555260	3.31012345		69.00000000	0.49768116	4.34254313	1.495841
70	0.38948640	8.70666410	3.39112726		70.00000000	0.49057143	4.27124065	1.517328
71	0.39929521	8.72363000	3.48330367		71.00000000	0.48366197	4.21928809	1.538700
72	0.40944341	8.69497200	3.56009899		72.00000000	0.47694444	4.14701859	1.560042
73	0.41925970	8.70469670	3.64952853		73.00000000	0.47041096	4.09478472	1.581419
74	0.42943245	8.70251370	3.73714178		74.00000000	0.46405405	4.03843676	1.602890
75	0.43922341	8.69494530	3.81902352		75.00000000	0.45786667	3.98112562	1.624263
76	0.44939172	8.68312640	3.90212511		76.00000000	0.45184211	3.92340211	1.645633
77	0.45948708	8.67982100	3.98826561		77.00000000	0.44597403	3.87097472	1.667004
78	0.46939862	8.68417840	4.07634136		78.00000000	0.44025641	3.82326521	1.688490
79	0.47954011	8.65293410	4.14942897		79.00000000	0.43468354	3.76128806	1.709869
80	0.48931620	8.63858510	4.22699963		80.00000000	0.42925000	3.70811265	1.731259
81	0.49943984	8.60702990	4.29869364		81.00000000	0.42395062	3.64895564	1.752612
82	0.50927544	8.57752320	4.36832190		82.00000000	0.41878049	3.59209935	1.774092
83	0.51941174	8.49360280	4.41167701		83.00000000	0.41373494	3.51410024	1.795465
84	0.52920568	8.44946000	4.47150222		84.00000000	0.40880952	3.45421972	1.816859
85	0.53935093	8.30527500	4.47945780		85.00000000	0.40400000	3.35533110	1.838333
86	0.54947531	8.13296890	4.46886561		86.00000000	0.39930233	3.24751340	1.859709
87	0.55932802	7.89818860	4.41767819		87.00000000	0.39471264	3.11751490	1.881067
88	0.56941223	7.54039430	4.29359273		88.00000000	0.39022727	2.94246750	1.902448
89	0.57919502	7.09019610	4.10660627		89.00000000	0.38584270	2.73570038	1.923925
90	0.58935738	6.46313710	3.80909755		90.00000000	0.38155556	2.46604587	1.945321
91	0.59908730	5.64934110	3.38444851		91.00000000	0.37736264	2.13185026	1.966669
92	0.60926229	4.58685110	2.79459541		92.00000000	0.37326087	1.71209203	1.988135
93	0.61903834	3.30730180	2.04734662		93.00000000	0.36924731	1.22121230	2.009646
94	0.62916946	1.68120720	1.05776423		94.00000000	0.36531915	0.61417718	2.031024
95	0.63919783	-0.24245989	-0.15497984		95.00000000	0.36147368	-0.08764287	2.052387
96	0.64894485	-2.42120790	-1.57123040		96.00000000	0.35770833	-0.86608624	2.073761
97	0.65902239	-4.99559350	-3.29220797		97.00000000	0.35402062	-1.76854310	2.095235
98	0.66891533	-7.84977870	-5.25083731		98.00000000	0.35040816	-2.75062654	2.116622
99	0.67566514	-9.99637320	-6.75420090		99.00000000	0.34686869	-3.46742885	2.137966
100	0.67570090	-9.99998760	-6.75700062		100.00000000	0.34340000	-3.43399574	2.159333
101	0.67561603	-10.00003100	-6.75618124		101.00000000	0.34000000	-3.40001054	2.180848
13:49 02/04/2018
Test Lot:	JK-PERC
Recipe:	Recipe_YJX-LID
Cell Name:	1-0-50min
Test Order:	3
Test Condition:	Light
1	-0.29994467	8.71160320	-2.61299895		1.00000000	34.34000000	299.15645389	0.000000
2	-0.29013798	8.72252080	-2.53073457		2.00000000	17.17000000	149.76568214	0.061760
3	-0.27997848	8.72499750	-2.44281154		3.00000000	11.44666667	99.87213805	0.083153
4	-0.27016807	8.72044470	-2.35598571		4.00000000	8.58500000	74.86501775	0.104659
5	-0.26001975	8.71683980	-2.26655051		5.00000000	6.86800000	59.86725575	0.126052
6	-0.24985060	8.70001600	-2.17370422		6.00000000	5.72333333	49.79309157	0.147425
7	-0.24001636	8.73743060	-2.09712629		7.00000000	4.90571429	42.86333811	0.168791
8	-0.22989334	8.71001430	-2.00237428		8.00000000	4.29250000	37.38773638	0.190318
9	-0.22007549	8.72166630	-1.91942498		9.00000000	3.81555556	33.27800230	0.211696
10	-0.20994355	8.72079180	-1.83087399		10.00000000	3.43400000	29.94719904	0.233073
11	-0.20010112	8.71624090	-1.74412957		11.00000000	3.12181818	27.21051932	0.254429
12	-0.18994610	8.73005200	-1.65823933		12.00000000	2.86166667	24.98249881	0.275911
13	-0.18019003	8.71590710	-1.57051956		13.00000000	2.64153846	23.02340383	0.297275
14	-0.17003500	8.71475700	-1.48181371		14.00000000	2.45285714	21.37605396	0.318657
15	-0.16020821	8.72198490	-1.39733359		15.00000000	2.28933333	19.96753076	0.340131
16	-0.15003310	8.71199040	-1.30708693		16.00000000	2.14625000	18.69810940	0.361499
17	-0.13986988	8.72625260	-1.22053990		17.00000000	2.02000000	17.62703025	0.382857
18	-0.13004385	8.72034930	-1.13402780		18.00000000	1.90777778	16.63648861	0.404232
19	-0.11988882	8.71262450	-1.04454627		19.00000000	1.80736842	15.74692239	0.425711
20	-0.11009999	8.72032930	-0.96010817		20.00000000	1.71700000	14.97280541	0.447097
21	-0.09993456	8.72068020	-0.87149730		21.00000000	1.63523810	14.26038848	0.468431
22	-0.09011297	8.72020240	-0.78580333		22.00000000	1.56090909	13.61144320	0.489811
23	-0.07998921	8.71380900	-0.69701070		23.00000000	1.49304348	13.01009570	0.511295
24	-0.07012744	8.72821520	-0.61208741		24.00000000	1.43083333	12.48862125	0.532663
25	-0.06001559	8.70952320	-0.52270716		25.00000000	1.37360000	11.96340107	0.554025
26	-0.04987843	8.71455000	-0.43466810		26.00000000	1.32076923	11.50990950	0.575399
27	-0.04003899	8.71068000	-0.34876685		27.00000000	1.27185185	11.07869449	0.596879
28	-0.02988918	8.73546600	-0.26109592		28.00000000	1.22642857	10.71342509	0.618276
29	-0.02004527	8.71440980	-0.17468272		29.00000000	1.18413793	10.31906319	0.639626
30	-0.00994012	8.72073840	-0.08668518		30.00000000	1.14466667	9.98233856	0.661005
31	-0.00067601	8.71255400	-0.00588976		31.00000000	1.10774194	9.65126143	0.682607
32	0.00946689	8.72875880	0.08263424		32.00000000	1.07312500	9.36704929	0.703997
33	0.01928001	8.71105190	0.16794916		33.00000000	1.04060606	9.06477340	0.725341
34	0.02941985	8.72105690	0.25657220		34.00000000	1.01000000	8.80826747	0.746724
35	0.03927018	8.72017100	0.34244266		35.00000000	0.98114286	8.55573349	0.768201
36	0.04941077	8.71679970	0.43070377		36.00000000	0.95388889	8.31485838	0.789586
37	0.05923504	8.71849350	0.51644035		37.00000000	0.92810811	8.09170451	0.810953
38	0.06935554	8.72156430	0.60488880		38.00000000	0.90368421	7.88153995	0.832311
39	0.07951920	8.71853350	0.69329078		39.00000000	0.88051282	7.67678052	0.853777
40	0.08931296	8.71100900	0.77800602		40.00000000	0.85850000	7.47840123	0.875170
41	0.09947216	8.71376040	0.86677655		41.00000000	0.83756098	7.29830566	0.896550
42	0.10930983	8.72422120	0.95364314		42.00000000	0.81761905	7.13308943	0.917904
43	0.11946829	8.70681950	1.04018884		43.00000000	0.79860465	6.95330655	0.939388
44	0.12928364	8.71403790	1.12658254		44.00000000	0.78045455	6.80091049	0.960754
45	0.13942124	8.70266250	1.21333600		45.00000000	0.76311111	6.64109845	0.982156
46	0.14923286	8.72117230	1.30148548		46.00000000	0.74652174	6.51054471	1.003642
47	0.15937494	8.70361710	1.38713845		47.00000000	0.73063830	6.35919598	1.025018
48	0.16953340	8.72732730	1.47957347		48.00000000	0.71541667	6.24367541	1.046374
49	0.17935842	8.71316530	1.56277956		49.00000000	0.70081633	6.10632850	1.067745
50	0.18949752	8.70880410	1.65029678		50.00000000	0.68680000	5.98120666	1.089220
51	0.19931212	8.71844200	1.73769116		51.00000000	0.67333333	5.87041761	1.110597
52	0.20943038	8.71339040	1.82484866		52.00000000	0.66038462	5.75418897	1.131954
53	0.21926209	8.71253400	1.91032841		53.00000000	0.64792453	5.64506448	1.153330
54	0.22941385	8.72431470	2.00147862		54.00000000	0.63592593	5.54801790	1.174814
55	0.23925152	8.71740720	2.08565292		55.00000000	0.62436364	5.44283206	1.196195
56	0.24940701	8.72210500	2.17535413		56.00000000	0.61321429	5.34851939	1.217553
57	0.25953865	8.72201350	2.26369961		57.00000000	0.60245614	5.25463059	1.238930
58	0.26934358	8.71411610	2.34709123		58.00000000	0.59206897	5.15935770	1.260397
59	0.27949905	8.71280100	2.43521960		59.00000000	0.58203390	5.07114553	1.281793
60	0.28930697	8.72956850	2.52552501		60.00000000	0.57233333	4.99622304	1.303136
61	0.29946765	8.70224380	2.60604050		61.00000000	0.56295082	4.89893528	1.324503
62	0.30929118	8.71673970	2.69601071		62.00000000	0.55387097	4.82794905	1.345987
63	0.31944516	8.71292970	2.78330322		63.00000000	0.54507937	4.74923819	1.367372
64	0.32921809	8.71310140	2.86851060		64.00000000	0.53656250	4.67512347	1.388727
65	0.33935273	8.71187310	2.95639792		65.00000000	0.52830769	4.60254957	1.410101
66	0.34920081	8.71841050	3.04447601		66.00000000	0.52030303	4.53621540	1.431575
67	0.35935181	8.70586010	3.12846658		67.00000000	0.51253731	4.46207815	1.452974
68	0.36947829	8.70427510	3.21604068		68.00000000	0.50500000	4.39565893	1.474338
69	0.37931594	8.71132760	3.30434542		69.00000000	0.49768116	4.33546362	1.495700
70	0.38946250	8.70326710	3.38959616		70.00000000	0.49057143	4.26957417	1.517182
71	0.39932472	8.70312310	3.47537220		71.00000000	0.48366197	4.20936968	1.538556
72	0.40945342	8.71990200	3.57039370		72.00000000	0.47694444	4.15890882	1.559943
73	0.41925162	8.70009230	3.64752779		73.00000000	0.47041096	4.09261876	1.581299
74	0.42941231	8.71005730	3.74020583		74.00000000	0.46405405	4.04193740	1.602770
75	0.43924850	8.70452690	3.82345038		75.00000000	0.45786667	3.98551272	1.624158
76	0.44936827	8.69481750	3.90717510		76.00000000	0.45184211	3.92868464	1.645543
77	0.45950958	8.69033430	3.99329186		77.00000000	0.44597403	3.87566337	1.667015
78	0.46937928	8.68065830	4.07452114		78.00000000	0.44025641	3.82171546	1.688398
79	0.47953549	8.66012290	4.15283628		79.00000000	0.43468354	3.76441292	1.709764
80	0.48935008	8.64442540	4.23015026		80.00000000	0.42925000	3.71061960	1.731139
81	0.49949664	8.61670210	4.30401375		81.00000000	0.42395062	3.65305617	1.752617
82	0.50929856	8.57233140	4.36587604		82.00000000	0.41878049	3.58992513	1.773991
83	0.51944882	8.49916270	4.41488004		83.00000000	0.41373494	3.51640057	1.795334
84	0.52924335	8.42460350	4.45866538		84.00000000	0.40880952	3.44405815	1.816706
85	0.53936011	8.29549880	4.47426115		85.00000000	0.40400000	3.35138152	1.838194
86	0.54946423	8.11975770	4.46151641		86.00000000	0.39930233	3.24223813	1.859561
87	0.55929077	7.87593080	4.40493540		87.00000000	0.39471264	3.10872947	1.880937
88	0.56945515	7.52976990	4.28786625		88.00000000	0.39022727	2.93832157	1.902311
89	0.57920355	7.08112810	4.10141453		89.00000000	0.38584270	2.73220156	1.923787
90	0.58935380	6.43049340	3.78983572		90.00000000	0.38155556	2.45359048	1.945196
91	0.59909171	5.64620540	3.38259485		91.00000000	0.37736264	2.13066696	1.966542
92	0.60922784	4.56025460	2.77823406		92.00000000	0.37326087	1.70216460	1.988011
93	0.61905211	3.28456090	2.03331436		93.00000000	0.36924731	1.21281528	2.009526
94	0.62919050	1.64978170	1.03802697		94.00000000	0.36531915	0.60269685	2.030908
95	0.63918966	-0.24284519	-0.15522413		95.00000000	0.36147368	-0.08778215	2.052277
96	0.64898342	-2.41251970	-1.56568529		96.00000000	0.35770833	-0.86297840	2.073651
97	0.65903914	-4.97254180	-3.27709967		97.00000000	0.35402062	-1.76038232	2.095127
98	0.66891706	-7.78935670	-5.21043358		98.00000000	0.35040816	-2.72945417	2.116525
99	0.67593247	-9.99586770	-6.75653154		99.00000000	0.34686869	-3.46725350	2.137889
100	0.67592949	-10.00009200	-6.75935709		100.00000000	0.34340000	-3.43403159	2.159248
101	0.67590195	-10.00005800	-6.75905870		101.00000000	0.34000000	-3.40001972	2.180722
13:49 02/04/2018
Test Lot:	JK-PERC
Recipe:	Recipe_YJX-LID
Cell Name:	1-0-50min
Test Order:	4
Test Condition:	Light
1	-0.29995036	8.71550180	-2.61421790		1.00000000	34.34000000	299.29033181	0.000000
2	-0.29013678	8.72544100	-2.53157136		2.00000000	17.17000000	149.81582197	0.061817
3	-0.27999496	8.71454050	-2.44002742		3.00000000	11.44666667	99.75244026	0.083248
4	-0.27016649	8.71670820	-2.35496246		4.00000000	8.58500000	74.83293990	0.104763
5	-0.26001650	8.72343060	-2.26823589		5.00000000	6.86800000	59.91252136	0.126145
6	-0.24985161	8.71199890	-2.17670695		6.00000000	5.72333333	49.86167370	0.147489
7	-0.24005292	8.71814820	-2.09281693		7.00000000	4.90571429	42.76874417	0.168873
8	-0.22989920	8.70904450	-2.00220236		8.00000000	4.29250000	37.38357352	0.190367
9	-0.22006552	8.72339530	-1.91971852		9.00000000	3.81555556	33.28459940	0.211754
10	-0.20990883	8.72380730	-1.83120418		10.00000000	3.43400000	29.95755427	0.233119
11	-0.20008111	8.73058320	-1.74682478		11.00000000	3.12181818	27.25529337	0.254505
12	-0.18997353	8.70044990	-1.65285518		12.00000000	2.86166667	24.89778746	0.275987
13	-0.18014953	8.73775100	-1.57410174		13.00000000	2.64153846	23.08110533	0.297378
14	-0.17004271	8.71558670	-1.48202198		14.00000000	2.45285714	21.37808909	0.318716
15	-0.16018669	8.71406940	-1.39587793		15.00000000	2.28933333	19.94940955	0.340101
16	-0.15008582	8.72514720	-1.30952087		16.00000000	2.14625000	18.72634718	0.361592
17	-0.13992615	8.71934130	-1.22006386		17.00000000	2.02000000	17.61306943	0.382968
18	-0.13011777	8.71661470	-1.13418647		18.00000000	1.90777778	16.62936382	0.404332
19	-0.11996629	8.72228910	-1.04638066		19.00000000	1.80736842	15.76438988	0.425705
20	-0.11015197	8.71502590	-0.95997727		20.00000000	1.71700000	14.96369947	0.447191
21	-0.09996922	8.71151640	-0.87088353		21.00000000	1.63523810	14.24540348	0.468580
22	-0.09017127	8.72700690	-0.78692530		22.00000000	1.56090909	13.62206441	0.489960
23	-0.08001606	8.71721550	-0.69751726		23.00000000	1.49304348	13.01518175	0.511315
24	-0.07020472	8.71841340	-0.61207377		24.00000000	1.43083333	12.47459651	0.532792
25	-0.06005918	8.71706680	-0.52353990		25.00000000	1.37360000	11.97376296	0.554174
26	-0.04989802	8.71469210	-0.43484589		26.00000000	1.32076923	11.51009718	0.575568
27	-0.04007551	8.72090340	-0.34949466		27.00000000	1.27185185	11.09169714	0.596986
28	-0.02993593	8.71001240	-0.26074232		28.00000000	1.22642857	10.68220806	0.618450
29	-0.02011714	8.71772960	-0.17537581		29.00000000	1.18413793	10.32299429	0.639841
30	-0.00996044	8.71724410	-0.08682762		30.00000000	1.14466667	9.97833875	0.661200
31	-0.00072519	8.71300790	-0.00631856		31.00000000	1.10774194	9.65176424	0.682678
32	0.00943056	8.71047970	0.08214472		32.00000000	1.07312500	9.34743353	0.704170
33	0.01930042	8.71584220	0.16821945		33.00000000	1.04060606	9.06975822	0.725562
34	0.02942111	8.71534630	0.25641514		34.00000000	1.01000000	8.80249976	0.746923
35	0.03924855	8.71218870	0.34194076		35.00000000	0.98114286	8.54790171	0.768295
36	0.04940273	8.71305850	0.43044883		36.00000000	0.95388889	8.31128969	0.789778
37	0.05920932	8.71477220	0.51599577		37.00000000	0.92810811	8.08825074	0.811167
38	0.06935754	8.71584510	0.60450961		38.00000000	0.90368421	7.87637160	0.832556
39	0.07951321	8.72740750	0.69394416		39.00000000	0.88051282	7.68459419	0.853915
40	0.08931981	8.70936680	0.77791899		40.00000000	0.85850000	7.47699140	0.875387
41	0.09947176	8.72082330	0.86747560		41.00000000	0.83756098	7.30422127	0.896764
42	0.10930292	8.70417020	0.95139122		42.00000000	0.81761905	7.11669535	0.918145
43	0.11944146	8.72276590	1.04185989		43.00000000	0.79860465	6.96604142	0.939645
44	0.12928900	8.71234230	1.12641002		44.00000000	0.78045455	6.79958715	0.961020
45	0.13940893	8.71044640	1.21431401		45.00000000	0.76311111	6.64703843	0.982373
46	0.14923786	8.72650430	1.30232483		46.00000000	0.74652174	6.51452517	1.003753
47	0.15940320	8.70906830	1.38825336		47.00000000	0.73063830	6.36317884	1.025231
48	0.16954324	8.72131920	1.47864071		48.00000000	0.71541667	6.23937711	1.046613
49	0.17934537	8.71377750	1.56277565		49.00000000	0.70081633	6.10675754	1.067976
50	0.18944596	8.72039790	1.65204415		50.00000000	0.68680000	5.98916928	1.089378
51	0.19926819	8.71753790	1.73712800		51.00000000	0.67333333	5.86980885	1.110856
52	0.20938738	8.71354390	1.82450613		52.00000000	0.66038462	5.75429034	1.132234
53	0.21922822	8.72234730	1.91218467		53.00000000	0.64792453	5.65142276	1.153591
54	0.22936156	8.71245570	1.99830243		54.00000000	0.63592593	5.54047646	1.174961
55	0.23919643	8.72085000	2.08599619		55.00000000	0.62436364	5.44498162	1.196435
56	0.24933945	8.70927330	2.17156541		56.00000000	0.61321429	5.34065081	1.217809
57	0.25950107	8.72096540	2.26309985		57.00000000	0.60245614	5.25399916	1.239169
58	0.26932254	8.71952820	2.34836548		58.00000000	0.59206897	5.16256204	1.260547
59	0.27948642	8.71310520	2.43519458		59.00000000	0.58203390	5.07132259	1.282025
60	0.28928632	8.71638970	2.52153230		60.00000000	0.57233333	4.98868037	1.303413
61	0.29944792	8.71482090	2.60963499		61.00000000	0.56295082	4.90601557	1.324762
62	0.30927983	8.72867870	2.69960426		62.00000000	0.55387097	4.83456172	1.346188
63	0.31940052	8.70186040	2.77937874		63.00000000	0.54507937	4.74320454	1.367693
64	0.32921752	8.72787760	2.87337022		64.00000000	0.53656250	4.68305182	1.389064
65	0.33939180	8.71623230	2.95821777		65.00000000	0.52830769	4.60485257	1.410444
66	0.34921256	8.70559020	3.04010144		66.00000000	0.52030303	4.52954496	1.431807
67	0.35936448	8.70687680	3.12894225		67.00000000	0.51253731	4.46259924	1.453284
68	0.36950749	8.70908640	3.21807266		68.00000000	0.50500000	4.39808863	1.474664
69	0.37931633	8.70890430	3.30342962		69.00000000	0.49768116	4.33425759	1.496047
70	0.38948688	8.70837880	3.39179929		70.00000000	0.49057143	4.27208183	1.517396
71	0.39928305	8.71315670	3.47901578		71.00000000	0.48366197	4.21422255	1.538879
72	0.40947446	8.70566370	3.56474694		72.00000000	0.47694444	4.15211794	1.560251
73	0.41926765	8.70365240	3.64915989		73.00000000	0.47041096	4.09429347	1.581629
74	0.42940098	8.70035170	3.73593955		74.00000000	0.46405405	4.03743348	1.603111
75	0.43922472	8.70199870	3.82213294		75.00000000	0.45786667	3.98435514	1.624495
76	0.44940269	8.70071030	3.91012261		76.00000000	0.45184211	3.93134726	1.645835
77	0.45952711	8.68807410	3.99240558		77.00000000	0.44597403	3.87465538	1.667219
78	0.46939251	8.66235160	4.06604296		78.00000000	0.44025641	3.81365582	1.688693
79	0.47952509	8.66880040	4.15690729		79.00000000	0.43468354	3.76818488	1.710085
80	0.48935848	8.63574700	4.22597603		80.00000000	0.42925000	3.70689440	1.731444
81	0.49945760	8.61950870	4.30507913		81.00000000	0.42395062	3.65424603	1.752820
82	0.50926495	8.56088350	4.35975791		82.00000000	0.41878049	3.58513097	1.774287
83	0.51942432	8.50949950	4.42004099		83.00000000	0.41373494	3.52067726	1.795667
84	0.52921081	8.42351530	4.45781535		84.00000000	0.40880952	3.44361328	1.817017
85	0.53934342	8.29597570	4.47437991		85.00000000	0.40400000	3.35157418	1.838432
86	0.54944921	8.12682910	4.46527983		86.00000000	0.39930233	3.24506176	1.859918
87	0.55929524	7.88124850	4.40794477		87.00000000	0.39471264	3.11082843	1.881299
88	0.56942862	7.53034970	4.28799664		88.00000000	0.39022727	2.93854783	1.902659
89	0.57917196	7.07188560	4.09583784		89.00000000	0.38584270	2.72863541	1.924038
90	0.58933353	6.43916420	3.79481537		90.00000000	0.38155556	2.45689887	1.945525
91	0.59912527	5.62410450	3.36954313		91.00000000	0.37736264	2.12232691	1.966916
92	0.60925192	4.55879310	2.77745345		92.00000000	0.37326087	1.70161908	1.988379
93	0.61901236	3.28927020	2.03609891		93.00000000	0.36924731	1.21455418	2.009797
94	0.62915242	1.65782230	1.04302291		94.00000000	0.36531915	0.60563423	2.031289
95	0.63917333	-0.26210314	-0.16752934		95.00000000	0.36147368	-0.09474339	2.052716
96	0.64893824	-2.42778020	-1.57547941		96.00000000	0.35770833	-0.86843721	2.074105
97	0.65901208	-4.99298950	-3.29044040		97.00000000	0.35402062	-1.76762123	2.095488
98	0.66896009	-7.81468300	-5.22771104		98.00000000	0.35040816	-2.73832872	2.116976
99	0.67583942	-9.99601750	-6.75570267		99.00000000	0.34686869	-3.46730546	2.138375
100	0.67581189	-10.00001800	-6.75813106		100.00000000	0.34340000	-3.43400618	2.159756
101	0.67577767	-9.99999620	-6.75777413		101.00000000	0.34000000	-3.39999871	2.181100
