# Supplementary material for: Study on the Electrical Injection Regeneration of Industrialized B-Doped Czochralski Silicon PERC Solar Cells
Source: Hindawi journal article supplement (doi:10.1155/2019/5357370), 2019-06-20
Supplement: f1 [file 5357370.f1.zip › section3.2/IVRawData_1-0-60min.csv]

14:15 02/04/2018
Test Lot:	JK-PERC
Recipe:	Recipe_YJX-LID
Cell Name:	1-0-60min
Test Order:	2
Test Condition:	Light
1	-0.29997623	8.70994000	-2.61277496		1.00000000	34.34000000	299.09933960	0.000000
2	-0.29010481	8.72006510	-2.52973283		2.00000000	17.17000000	149.72351777	0.061786
3	-0.27998254	8.70849990	-2.43822792		3.00000000	11.44666667	99.68329552	0.083211
4	-0.27016544	8.70585440	-2.35202098		4.00000000	8.58500000	74.73976002	0.104697
5	-0.26002756	8.72235770	-2.26805339		5.00000000	6.86800000	59.90515268	0.126080
6	-0.24987330	8.70554920	-2.17528431		6.00000000	5.72333333	49.82475992	0.147425
7	-0.24005397	8.71364780	-2.09174575		7.00000000	4.90571429	42.74666649	0.168801
8	-0.22991459	8.71898840	-2.00462264		8.00000000	4.29250000	37.42625771	0.190277
9	-0.22010568	8.71712300	-1.91868829		9.00000000	3.81555556	33.26066709	0.211642
10	-0.20998342	8.71336460	-1.82966210		10.00000000	3.43400000	29.92169404	0.232983
11	-0.20012240	8.72265150	-1.74559795		11.00000000	3.12181818	27.23053205	0.254359
12	-0.18996145	8.70891000	-1.65435717		12.00000000	2.86166667	24.92199745	0.275841
13	-0.18020537	8.72396370	-1.57210511		13.00000000	2.64153846	23.04468565	0.297223
14	-0.17005856	8.70753190	-1.48079034		14.00000000	2.45285714	21.35833182	0.318584
15	-0.16021988	8.72227480	-1.39748182		15.00000000	2.28933333	19.96819444	0.339967
16	-0.15006711	8.72266480	-1.30898510		16.00000000	2.14625000	18.72101933	0.361438
17	-0.13996272	8.71625140	-1.21995025		17.00000000	2.02000000	17.60682783	0.382806
18	-0.13012478	8.71465300	-1.13399230		18.00000000	1.90777778	16.62562133	0.404155
19	-0.11998168	8.72367000	-1.04668058		19.00000000	1.80736842	15.76688567	0.425523
20	-0.11013480	8.71582130	-0.95991524		20.00000000	1.71700000	14.96506517	0.446999
21	-0.09998352	8.71551040	-0.87140742		21.00000000	1.63523810	14.25193463	0.468361
22	-0.09017461	8.72045040	-0.78636320		22.00000000	1.56090909	13.61183031	0.489744
23	-0.08003970	8.71275040	-0.69736595		23.00000000	1.49304348	13.00851516	0.511085
24	-0.07021144	8.71904370	-0.61217661		24.00000000	1.43083333	12.47549836	0.532562
25	-0.06003485	8.71143340	-0.52298959		25.00000000	1.37360000	11.96602492	0.553951
26	-0.04987166	8.71506310	-0.43463464		26.00000000	1.32076923	11.51058719	0.575330
27	-0.04006349	8.72163390	-0.34941908		27.00000000	1.27185185	11.09262623	0.596802
28	-0.02990848	8.70884040	-0.26046821		28.00000000	1.22642857	10.68077069	0.618255
29	-0.02008766	8.71758370	-0.17511588		29.00000000	1.18413793	10.32282153	0.639637
30	-0.00997508	8.70389840	-0.08682211		30.00000000	1.14466667	9.96306237	0.661022
31	-0.00067005	8.71081450	-0.00583669		31.00000000	1.10774194	9.64933451	0.682477
32	0.00947507	8.70568750	0.08248701		32.00000000	1.07312500	9.34229090	0.703970
33	0.01929264	8.72405720	0.16831006		33.00000000	1.04060606	9.07830680	0.725362
34	0.02945033	8.70965770	0.25650227		34.00000000	1.01000000	8.79675428	0.746773
35	0.03926789	8.71765040	0.34232374		35.00000000	0.98114286	8.55326042	0.768127
36	0.04936753	8.69677260	0.42933820		36.00000000	0.95388889	8.29575475	0.789591
37	0.05923050	8.71788020	0.51636436		37.00000000	0.92810811	8.09113530	0.810974
38	0.06933609	8.70622830	0.60365580		38.00000000	0.90368421	7.86768105	0.832363
39	0.07951834	8.71936890	0.69334975		39.00000000	0.88051282	7.67751610	0.853728
40	0.08931954	8.71045210	0.77801353		40.00000000	0.85850000	7.47792313	0.875208
41	0.09947127	8.70803550	0.86619936		41.00000000	0.83756098	7.29351071	0.896582
42	0.10925236	8.71765710	0.95242461		42.00000000	0.81761905	7.12772250	0.917971
43	0.11942941	8.70511050	1.03964621		43.00000000	0.79860465	6.95194173	0.939475
44	0.12926930	8.71084310	1.12604459		44.00000000	0.78045455	6.79841709	0.960853
45	0.13942178	8.71346280	1.21484649		45.00000000	0.76311111	6.64934028	0.982221
46	0.14920510	8.71664910	1.30056850		46.00000000	0.74652174	6.50716805	1.003599
47	0.15938215	8.71384530	1.38883140		47.00000000	0.73063830	6.36666910	1.025080
48	0.16951230	8.71656510	1.47756500		48.00000000	0.71541667	6.23597595	1.046455
49	0.17933658	8.71123980	1.56224395		49.00000000	0.70081633	6.10497908	1.067808
50	0.18947044	8.71214770	1.65069446		50.00000000	0.68680000	5.98350304	1.089185
51	0.19926271	8.72666840	1.73889959		51.00000000	0.67333333	5.87595672	1.110654
52	0.20939361	8.71453290	1.82476750		52.00000000	0.66038462	5.75494346	1.132018
53	0.21924540	8.71068950	1.90977860		53.00000000	0.64792453	5.64386939	1.153378
54	0.22935398	8.72429750	2.00095235		54.00000000	0.63592593	5.54800697	1.174758
55	0.23920131	8.71196270	2.08391289		55.00000000	0.62436364	5.43943271	1.196223
56	0.24934784	8.71598430	2.17331186		56.00000000	0.61321429	5.34476609	1.217603
57	0.25950778	8.71443940	2.26146482		57.00000000	0.60245614	5.25006753	1.238955
58	0.26935360	8.71663190	2.34785618		58.00000000	0.59206897	5.16084723	1.260322
59	0.27948526	8.71596430	2.43598355		59.00000000	0.58203390	5.07298668	1.281804
60	0.28932664	8.70635510	2.51898047		60.00000000	0.57233333	4.98293724	1.303173
61	0.29945827	8.71905710	2.61099376		61.00000000	0.56295082	4.90840034	1.324534
62	0.30927882	8.70762830	2.69308501		62.00000000	0.55387097	4.82290251	1.345915
63	0.31941342	8.71098610	2.78240586		63.00000000	0.54507937	4.74817877	1.367396
64	0.32923770	8.71210960	2.86835493		64.00000000	0.53656250	4.67459131	1.388785
65	0.33941251	8.71105480	2.95664097		65.00000000	0.52830769	4.60211726	1.410139
66	0.34920180	8.71621130	3.04371668		66.00000000	0.52030303	4.53507115	1.431497
67	0.35938627	8.70490840	3.12842456		67.00000000	0.51253731	4.46159037	1.452972
68	0.36953577	8.70944400	3.21845109		68.00000000	0.50500000	4.39826922	1.474342
69	0.37934738	8.70972630	3.30401185		69.00000000	0.49768116	4.33466668	1.495723
70	0.38949317	8.69951150	3.38840031		70.00000000	0.49057143	4.26773178	1.517076
71	0.39929363	8.71175770	3.47854936		71.00000000	0.48366197	4.21354591	1.538562
72	0.40946621	8.69192980	3.55905155		72.00000000	0.47694444	4.14556763	1.559984
73	0.41927484	8.70875640	3.65136245		73.00000000	0.47041096	4.09669445	1.581386
74	0.42940202	8.69447610	3.73342560		74.00000000	0.46405405	4.03470688	1.602869
75	0.43923372	8.69868180	3.82075437		75.00000000	0.45786667	3.98283644	1.624264
76	0.44939587	8.68147370	3.90141843		76.00000000	0.45184211	3.92265535	1.645609
77	0.45953050	8.69486330	3.99555488		77.00000000	0.44597403	3.87768319	1.666979
78	0.46941653	8.65941810	4.06487400		78.00000000	0.44025641	3.81236433	1.688453
79	0.47952065	8.66636370	4.15570035		79.00000000	0.43468354	3.76712569	1.709845
80	0.48935384	8.63098430	4.22360531		80.00000000	0.42925000	3.70485001	1.731187
81	0.49947655	8.59987260	4.29543470		81.00000000	0.42395062	3.64592130	1.752570
82	0.50929558	8.56997490	4.36465034		82.00000000	0.41878049	3.58893827	1.774063
83	0.51944363	8.49747940	4.41396155		83.00000000	0.41373494	3.51570413	1.795425
84	0.52921504	8.41278270	4.45217113		84.00000000	0.40880952	3.43922569	1.816803
85	0.53934669	8.30569740	4.47965040		85.00000000	0.40400000	3.35550175	1.838177
86	0.54949844	8.11597250	4.45971423		86.00000000	0.39930233	3.24072669	1.859652
87	0.55928695	7.87157200	4.40246750		87.00000000	0.39471264	3.10700899	1.881044
88	0.56941861	7.52416470	4.28439940		88.00000000	0.39022727	2.93613427	1.902388
89	0.57922500	7.06763270	4.09374955		89.00000000	0.38584270	2.72699446	1.923767
90	0.58933133	6.41952750	3.78322868		90.00000000	0.38155556	2.44940638	1.945247
91	0.59911686	5.61574130	3.36448529		91.00000000	0.37736264	2.11917095	1.966626
92	0.60923737	4.52621220	2.75753762		92.00000000	0.37326087	1.68945790	1.988088
93	0.61904824	3.23005750	1.99956141		93.00000000	0.36924731	1.19269005	2.009531
94	0.62918437	1.59050730	1.00072233		94.00000000	0.36531915	0.58104277	2.031033
95	0.63919246	-0.35707051	-0.22823678		95.00000000	0.36147368	-0.12907159	2.052423
96	0.64898467	-2.55090000	-1.65549499		96.00000000	0.35770833	-0.91247819	2.073803
97	0.65902406	-5.15863510	-3.39966465		97.00000000	0.35402062	-1.82626319	2.095163
98	0.66896743	-8.03291320	-5.37375730		98.00000000	0.35040816	-2.81479836	2.116633
99	0.67512619	-9.99722770	-6.74939025		99.00000000	0.34686869	-3.46772524	2.138046
100	0.67508823	-9.99998090	-6.75086941		100.00000000	0.34340000	-3.43399344	2.159421
101	0.67504948	-9.99986270	-6.75040212		101.00000000	0.34000000	-3.39995332	2.180780
14:15 02/04/2018
Test Lot:	JK-PERC
Recipe:	Recipe_YJX-LID
Cell Name:	1-0-60min
Test Order:	3
Test Condition:	Light
1	-0.29991513	8.70616150	-2.61110956		1.00000000	34.34000000	298.96958591	0.000000
2	-0.29013151	8.72733120	-2.53207378		2.00000000	17.17000000	149.84827670	0.061751
3	-0.28001148	8.69902900	-2.43582798		3.00000000	11.44666667	99.57488529	0.083284
4	-0.27020848	8.70792390	-2.35295488		4.00000000	8.58500000	74.75752668	0.104670
5	-0.26003486	8.72720430	-2.26937735		5.00000000	6.86800000	59.93843913	0.126043
6	-0.24988578	8.70692060	-2.17573565		6.00000000	5.72333333	49.83260890	0.147424
7	-0.24002920	8.71751980	-2.09245930		7.00000000	4.90571429	42.76566142	0.168906
8	-0.22990470	8.70723150	-2.00183345		8.00000000	4.29250000	37.37579121	0.190290
9	-0.22005185	8.71560570	-1.91788516		9.00000000	3.81555556	33.25487775	0.211634
10	-0.20992808	8.71103480	-1.82869081		10.00000000	3.43400000	29.91369350	0.233018
11	-0.20011617	8.70790580	-1.74259276		11.00000000	3.12181818	27.18449865	0.254504
12	-0.18996933	8.73329540	-1.65905828		12.00000000	2.86166667	24.99178034	0.275887
13	-0.18016337	8.70473670	-1.56827470		13.00000000	2.64153846	22.99389679	0.297243
14	-0.17001058	8.72705080	-1.48369097		14.00000000	2.45285714	21.40620889	0.318626
15	-0.16019642	8.71685410	-1.39640882		15.00000000	2.28933333	19.95578465	0.340112
16	-0.15007713	8.71284200	-1.30759832		16.00000000	2.14625000	18.69993714	0.361495
17	-0.13992061	8.71828270	-1.21986743		17.00000000	2.02000000	17.61093105	0.382850
18	-0.13008563	8.71348290	-1.13349891		18.00000000	1.90777778	16.62338904	0.404238
19	-0.11993805	8.71997170	-1.04585640		19.00000000	1.80736842	15.76020148	0.425711
20	-0.11007924	8.71404840	-0.95923583		20.00000000	1.71700000	14.96202110	0.447092
21	-0.09992496	8.72154330	-0.87149986		21.00000000	1.63523810	14.26179985	0.468442
22	-0.09010188	8.71235940	-0.78499999		22.00000000	1.56090909	13.59920099	0.489826
23	-0.07996769	8.71590140	-0.69699052		23.00000000	1.49304348	13.01321974	0.511319
24	-0.07017290	8.70839120	-0.61109305		24.00000000	1.43083333	12.46025641	0.532702
25	-0.06002085	8.72009470	-0.52338749		25.00000000	1.37360000	11.97792208	0.554095
26	-0.04984573	8.71537020	-0.43442395		26.00000000	1.32076923	11.51099279	0.575442
27	-0.04005019	8.70315930	-0.34856318		27.00000000	1.27185185	11.06912927	0.596909
28	-0.02987804	8.71339420	-0.26033917		28.00000000	1.22642857	10.68635560	0.618302
29	-0.02003338	8.70252990	-0.17434111		29.00000000	1.18413793	10.30499575	0.639683
30	-0.00991482	8.72493460	-0.08650619		30.00000000	1.14466667	9.98714181	0.661156
31	-0.00063805	8.71613790	-0.00556136		31.00000000	1.10774194	9.65523147	0.682747
32	0.00952346	8.70262530	0.08287914		32.00000000	1.07312500	9.33900478	0.704127
33	0.01932914	8.71102810	0.16837672		33.00000000	1.04060606	9.06474863	0.725517
34	0.02948239	8.71415230	0.25691406		34.00000000	1.01000000	8.80129382	0.746875
35	0.03928361	8.71450230	0.34233708		35.00000000	0.98114286	8.55017169	0.768385
36	0.04939890	8.71929740	0.43072369		36.00000000	0.95388889	8.31724091	0.789779
37	0.05923435	8.70443920	0.51560177		37.00000000	0.92810811	8.07866060	0.811137
38	0.06937197	8.71718790	0.60472849		38.00000000	0.90368421	7.87758507	0.832497
39	0.07951479	8.71299080	0.69281167		39.00000000	0.88051282	7.67190010	0.853977
40	0.08934578	8.72186570	0.77926192		40.00000000	0.85850000	7.48772170	0.875362
41	0.09949829	8.71077250	0.86670694		41.00000000	0.83756098	7.29580311	0.896742
42	0.10929429	8.70952800	0.95190168		42.00000000	0.81761905	7.12107599	0.918116
43	0.11946540	8.72590730	1.04244401		43.00000000	0.79860465	6.96855016	0.939592
44	0.12929043	8.70541570	1.12552694		44.00000000	0.78045455	6.79418125	0.960960
45	0.13942879	8.72460460	1.21646106		45.00000000	0.76311111	6.65784271	0.982356
46	0.14921661	8.70130830	1.29837973		46.00000000	0.74652174	6.49571580	1.003842
47	0.15938698	8.72380160	1.39046039		47.00000000	0.73063830	6.37394355	1.025250
48	0.16954172	8.71411710	1.47740640		48.00000000	0.71541667	6.23422461	1.046597
49	0.17934665	8.70856950	1.56185277		49.00000000	0.70081633	6.10310769	1.067965
50	0.18951702	8.71482660	1.65160797		50.00000000	0.68680000	5.98534291	1.089457
51	0.19928920	8.70698070	1.73520722		51.00000000	0.67333333	5.86270034	1.110848
52	0.20942906	8.70215610	1.82248437		52.00000000	0.66038462	5.74677001	1.132200
53	0.21927939	8.71153350	1.91025975		53.00000000	0.64792453	5.64441623	1.153582
54	0.22943784	8.70794580	1.99793228		54.00000000	0.63592593	5.53760850	1.175066
55	0.23924725	8.71603300	2.08528693		55.00000000	0.62436364	5.44197406	1.196433
56	0.24940422	8.70911030	2.17208886		56.00000000	0.61321429	5.34055085	1.217795
57	0.25955600	8.71766850	2.26272317		57.00000000	0.60245614	5.25201292	1.239184
58	0.26938698	8.70727630	2.34562687		58.00000000	0.59206897	5.15530807	1.260658
59	0.27953574	8.71868320	2.43718356		59.00000000	0.58203390	5.07456917	1.282051
60	0.28934738	8.70819950	2.51969471		60.00000000	0.57233333	4.98399285	1.303398
61	0.29948500	8.70581910	2.60726223		61.00000000	0.56295082	4.90094800	1.324774
62	0.30929887	8.71530530	2.69563408		62.00000000	0.55387097	4.82715458	1.346251
63	0.31947222	8.70495700	2.78099194		63.00000000	0.54507937	4.74489243	1.367629
64	0.32927194	8.71382810	2.86921908		64.00000000	0.53656250	4.67551339	1.388987
65	0.33941627	8.70309260	2.95397123		65.00000000	0.52830769	4.59791077	1.410360
66	0.34924576	8.71338940	3.04311430		66.00000000	0.52030303	4.53360291	1.431844
67	0.35941538	8.70760350	3.12964662		67.00000000	0.51253731	4.46297170	1.453235
68	0.36955747	8.70742130	3.21789259		68.00000000	0.50500000	4.39724776	1.474619
69	0.37937877	8.70582960	3.30280693		69.00000000	0.49768116	4.33272737	1.495982
70	0.38948363	8.70684050	3.39117184		70.00000000	0.49057143	4.27132718	1.517449
71	0.39931685	8.70604800	3.47647166		71.00000000	0.48366197	4.21078434	1.538833
72	0.40946639	8.69624330	3.56081935		72.00000000	0.47694444	4.14762493	1.560222
73	0.41929811	8.70686240	3.65077095		73.00000000	0.47041096	4.09580349	1.581598
74	0.42943200	8.69394400	3.73345776		74.00000000	0.46405405	4.03445996	1.603072
75	0.43924588	8.69235990	3.81808327		75.00000000	0.45786667	3.97994185	1.624463
76	0.44939911	8.68923090	3.90493263		76.00000000	0.45184211	3.92616038	1.645852
77	0.45954344	8.66849710	3.98355098		77.00000000	0.44597403	3.86592455	1.667370
78	0.46941015	8.66801260	4.06885309		78.00000000	0.44025641	3.81614811	1.688749
79	0.47955447	8.66293810	4.15435069		79.00000000	0.43468354	3.76563664	1.710102
80	0.48936462	8.62983890	4.22313783		80.00000000	0.42925000	3.70435835	1.731480
81	0.49950224	8.61390300	4.30266384		81.00000000	0.42395062	3.65186949	1.752967
82	0.50930715	8.56167410	4.36052184		82.00000000	0.41878049	3.58546206	1.774366
83	0.51946044	8.49915030	4.41497235		83.00000000	0.41373494	3.51639544	1.795723
84	0.52924007	8.42368700	4.45815270		84.00000000	0.40880952	3.44368347	1.817112
85	0.53934568	8.28641220	4.46924062		85.00000000	0.40400000	3.34771053	1.838594
86	0.54951453	8.12038520	4.46226966		86.00000000	0.39930233	3.24248869	1.859974
87	0.55931950	7.85835080	4.39532884		87.00000000	0.39471264	3.10179042	1.881339
88	0.56945932	7.53373050	4.29015305		88.00000000	0.39022727	2.93986711	1.902718
89	0.57925457	7.03779460	4.07667468		89.00000000	0.38584270	2.71548165	1.924202
90	0.58934236	6.41501090	3.78063766		90.00000000	0.38155556	2.44768305	1.945581
91	0.59916514	5.59723620	3.35366881		91.00000000	0.37736264	2.11218781	1.966922
92	0.60926777	4.52302790	2.75573512		92.00000000	0.37326087	1.68826933	1.988395
93	0.61907274	3.21388960	1.98963144		93.00000000	0.36924731	1.18672010	2.009899
94	0.62919468	1.58636220	0.99813066		94.00000000	0.36531915	0.57952849	2.031336
95	0.63922143	-0.36222887	-0.23154446		95.00000000	0.36147368	-0.13093620	2.052713
96	0.64899290	-2.55050520	-1.65525977		96.00000000	0.35770833	-0.91233696	2.074101
97	0.65905380	-5.12954660	-3.38064718		97.00000000	0.35402062	-1.81596526	2.095601
98	0.66893691	-7.98472690	-5.34127854		98.00000000	0.35040816	-2.79791349	2.116995
99	0.67531526	-9.99697970	-6.75111295		99.00000000	0.34686869	-3.46763922	2.138404
100	0.67526764	-10.00011700	-6.75275541		100.00000000	0.34340000	-3.43404018	2.159764
101	0.67527956	-10.00007400	-6.75284557		101.00000000	0.34000000	-3.40002516	2.181254
14:15 02/04/2018
Test Lot:	JK-PERC
Recipe:	Recipe_YJX-LID
Cell Name:	1-0-60min
Test Order:	4
Test Condition:	Light
1	-0.29997003	8.72300150	-2.61663902		1.00000000	34.34000000	299.54787151	0.000000
2	-0.29013953	8.72567270	-2.53166258		2.00000000	17.17000000	149.81980026	0.061799
3	-0.28002471	8.71505740	-2.44043142		3.00000000	11.44666667	99.75835704	0.083267
4	-0.27017036	8.71216680	-2.35376924		4.00000000	8.58500000	74.79395198	0.104772
5	-0.26004586	8.73158070	-2.27061141		5.00000000	6.86800000	59.96849625	0.126155
6	-0.24986479	8.70345500	-2.17468696		6.00000000	5.72333333	49.81277412	0.147535
7	-0.24007000	8.71951680	-2.09329440		7.00000000	4.90571429	42.77545813	0.168913
8	-0.22988148	8.71018220	-2.00230958		8.00000000	4.29250000	37.38845709	0.190399
9	-0.22008595	8.70841030	-1.91659875		9.00000000	3.81555556	33.22742330	0.211800
10	-0.20993838	8.71182820	-1.82894710		10.00000000	3.43400000	29.91641804	0.233160
11	-0.20011978	8.71948810	-1.74494204		11.00000000	3.12181818	27.22065649	0.254531
12	-0.19001313	8.71143050	-1.65528618		12.00000000	2.86166667	24.92921028	0.276018
13	-0.18020643	8.72859000	-1.57294804		13.00000000	2.64153846	23.05690620	0.297392
14	-0.17003205	8.71858220	-1.48243840		14.00000000	2.45285714	21.38543662	0.318774
15	-0.16020304	8.71551320	-1.39625171		15.00000000	2.28933333	19.95271489	0.340132
16	-0.15007406	8.71126560	-1.30733500		16.00000000	2.14625000	18.69655379	0.361617
17	-0.13990639	8.72544290	-1.22074522		17.00000000	2.02000000	17.62539466	0.383007
18	-0.13008258	8.70913120	-1.13290626		18.00000000	1.90777778	16.61508697	0.404391
19	-0.11992308	8.72161960	-1.04592349		19.00000000	1.80736842	15.76317985	0.425826
20	-0.11010225	8.71399590	-0.95943056		20.00000000	1.71700000	14.96193096	0.447288
21	-0.09997179	8.70993710	-0.87074797		21.00000000	1.63523810	14.24282095	0.468665
22	-0.09016881	8.71129700	-0.78548729		22.00000000	1.56090909	13.59754268	0.490039
23	-0.07999444	8.70851230	-0.69663256		23.00000000	1.49304348	13.00218749	0.511384
24	-0.07017732	8.71957680	-0.61191657		24.00000000	1.43083333	12.47626114	0.532880
25	-0.06001933	8.72312450	-0.52355604		25.00000000	1.37360000	11.98208381	0.554258
26	-0.04986877	8.70272640	-0.43399426		26.00000000	1.32076923	11.49429325	0.575633
27	-0.04003825	8.72686100	-0.34940828		27.00000000	1.27185185	11.09927432	0.596996
28	-0.02991747	8.71038440	-0.26059267		28.00000000	1.22642857	10.68266430	0.618482
29	-0.02012045	8.71564670	-0.17536272		29.00000000	1.18413793	10.32052785	0.639874
30	-0.00994757	8.72502520	-0.08679276		30.00000000	1.14466667	9.98724551	0.661261
31	-0.00067750	8.68716910	-0.00588554		31.00000000	1.10774194	9.62314151	0.682746
32	0.00947955	8.72975830	0.08275417		32.00000000	1.07312500	9.36812188	0.704237
33	0.01926736	8.69971370	0.16762052		33.00000000	1.04060606	9.05297480	0.725631
34	0.02941465	8.73151400	0.25683441		34.00000000	1.01000000	8.81882914	0.747022
35	0.03925530	8.70119570	0.34156806		35.00000000	0.98114286	8.53711601	0.768511
36	0.04937729	8.70734880	0.42994524		36.00000000	0.95388889	8.30584327	0.789882
37	0.05922240	8.72165580	0.51651742		37.00000000	0.92810811	8.09463946	0.811243
38	0.06935927	8.71327500	0.60434642		38.00000000	0.90368421	7.87404904	0.832623
39	0.07953410	8.72032740	0.69356338		39.00000000	0.88051282	7.67836007	0.854102
40	0.08933903	8.72172930	0.77919086		40.00000000	0.85850000	7.48760460	0.875505
41	0.09944762	8.70873930	0.86606335		41.00000000	0.83756098	7.29410018	0.896862
42	0.10930911	8.71068290	0.95215700		42.00000000	0.81761905	7.12202026	0.918220
43	0.11946087	8.70089050	1.03941595		43.00000000	0.79860465	6.94857162	0.939711
44	0.12927994	8.71302990	1.12641998		44.00000000	0.78045455	6.80012379	0.961088
45	0.13942872	8.70546820	1.21379229		45.00000000	0.76311111	6.64323951	0.982449
46	0.14923960	8.71190450	1.30016114		46.00000000	0.74652174	6.50362610	1.003823
47	0.15939134	8.71458820	1.38902989		47.00000000	0.73063830	6.36721189	1.025300
48	0.16954981	8.70544820	1.47600709		48.00000000	0.71541667	6.22802273	1.046686
49	0.17935771	8.71311950	1.56276516		49.00000000	0.70081633	6.10629640	1.068038
50	0.18949682	8.71444800	1.65136018		50.00000000	0.68680000	5.98508289	1.089409
51	0.19930397	8.71003250	1.73594406		51.00000000	0.67333333	5.86475522	1.110882
52	0.20943563	8.70574190	1.82329254		52.00000000	0.66038462	5.74913802	1.132256
53	0.21925917	8.71545980	1.91094448		53.00000000	0.64792453	5.64696018	1.153597
54	0.22940423	8.70651440	1.99731123		54.00000000	0.63592593	5.53669823	1.174977
55	0.23925753	8.71449180	2.08500778		55.00000000	0.62436364	5.44101179	1.196452
56	0.24940035	8.70507050	2.17104763		56.00000000	0.61321429	5.33807359	1.217831
57	0.25950372	8.70869920	2.25993984		57.00000000	0.60245614	5.24660931	1.239207
58	0.26935926	8.70787430	2.34554658		58.00000000	0.59206897	5.15566213	1.260573
59	0.27948722	8.70275310	2.43230827		59.00000000	0.58203390	5.06529731	1.282048
60	0.28933531	8.71569630	2.52175869		60.00000000	0.57233333	4.98828352	1.303422
61	0.29949078	8.71216680	2.60921363		61.00000000	0.56295082	4.90452144	1.324806
62	0.30931059	8.70544150	2.69268525		62.00000000	0.55387097	4.82169131	1.346164
63	0.31945416	8.71022220	2.78251672		63.00000000	0.54507937	4.74776239	1.367653
64	0.32928589	8.71176620	2.86866169		64.00000000	0.53656250	4.67440705	1.389025
65	0.33940712	8.70698360	2.95521223		65.00000000	0.52830769	4.59996641	1.410414
66	0.34924629	8.70108410	3.03882134		66.00000000	0.52030303	4.52720042	1.431913
67	0.35937944	8.69954010	3.12643585		67.00000000	0.51253731	4.45883891	1.453286
68	0.36953640	8.71285630	3.21971755		68.00000000	0.50500000	4.39999243	1.474655
69	0.37932792	8.70338540	3.30143708		69.00000000	0.49768116	4.33151094	1.496028
70	0.38946033	8.70540810	3.39041111		70.00000000	0.49057143	4.27062449	1.517509
71	0.39930248	8.70660590	3.47656933		71.00000000	0.48366197	4.21105418	1.538893
72	0.40945348	8.70439150	3.56404339		72.00000000	0.47694444	4.15151117	1.560241
73	0.41926512	8.70310970	3.64891033		73.00000000	0.47041096	4.09403818	1.581621
74	0.42942953	8.69196510	3.73258649		74.00000000	0.46405405	4.03354164	1.603112
75	0.43924412	8.69890120	3.82094120		75.00000000	0.45786667	3.98293690	1.624480
76	0.44938844	8.69007300	3.90521835		76.00000000	0.45184211	3.92654088	1.645844
77	0.45952532	8.68062880	3.98896873		77.00000000	0.44597403	3.87133497	1.667223
78	0.46938309	8.67206860	4.07052236		78.00000000	0.44025641	3.81793379	1.688709
79	0.47950134	8.65413380	4.14966875		79.00000000	0.43468354	3.76180955	1.710094
80	0.48934647	8.63778690	4.22687053		80.00000000	0.42925000	3.70777003	1.731447
81	0.49946770	8.60616870	4.29850329		81.00000000	0.42395062	3.64859053	1.752814
82	0.50929272	8.56318380	4.36116717		82.00000000	0.41878049	3.58609429	1.774296
83	0.51944894	8.49768730	4.41411466		83.00000000	0.41373494	3.51579014	1.795676
84	0.52924418	8.41490460	4.45353928		84.00000000	0.40880952	3.44009314	1.817013
85	0.53934759	8.29601570	4.47443607		85.00000000	0.40400000	3.35159034	1.838395
86	0.54950303	8.10769560	4.45520330		86.00000000	0.39930233	3.23742171	1.859891
87	0.55931246	7.86203720	4.39733537		87.00000000	0.39471264	3.10324549	1.881276
88	0.56943071	7.52599430	4.28553228		88.00000000	0.39022727	2.93684823	1.902652
89	0.57920736	7.03017090	4.07192673		89.00000000	0.38584270	2.71254010	1.924016
90	0.58932710	6.40496830	3.77462139		90.00000000	0.38155556	2.44385124	1.945482
91	0.59914470	5.58806560	3.34805989		91.00000000	0.37736264	2.10872717	1.966865
92	0.60926294	4.50521560	2.74486090		92.00000000	0.37326087	1.68162069	1.988355
93	0.61902320	3.21447400	1.98983398		93.00000000	0.36924731	1.18693588	2.009748
94	0.62916082	1.56722270	0.98603512		94.00000000	0.36531915	0.57253646	2.031275
95	0.63919872	-0.36827958	-0.23540384		95.00000000	0.36147368	-0.13312338	2.052669
96	0.64896643	-2.55443600	-1.65774321		96.00000000	0.35770833	-0.91374304	2.074066
97	0.65902662	-5.14478540	-3.39055053		97.00000000	0.35402062	-1.82136011	2.095576
98	0.66897672	-8.01230810	-5.36004759		98.00000000	0.35040816	-2.80757816	2.116951
99	0.67524415	-9.99707030	-6.75046324		99.00000000	0.34686869	-3.46767065	2.138308
100	0.67520767	-10.00025300	-6.75224753		100.00000000	0.34340000	-3.43408688	2.159699
101	0.67518908	-10.00013400	-6.75198128		101.00000000	0.34000000	-3.40004556	2.181173
