# Supplementary material for: Study on the Electrical Injection Regeneration of Industrialized B-Doped Czochralski Silicon PERC Solar Cells
Source: Hindawi journal article supplement (doi:10.1155/2019/5357370), 2019-06-20
Supplement: f1 [file 5357370.f1.zip › section3.2/IVRawData_1-0-after.csv]

12:04 02/04/2018
Test Lot:	JK-PERC
Recipe:	Recipe_YJX-LID
Cell Name:	1-0-after
Test Order:	2
Test Condition:	Light
1	-0.29994673	8.96101090	-2.68782592		1.00000000	34.34000000	307.72111431	0.000000
2	-0.29010046	8.96287160	-2.60013317		2.00000000	17.17000000	153.89250537	0.061819
3	-0.27995947	8.95025160	-2.50570769		3.00000000	11.44666667	102.45054665	0.083253
4	-0.27015415	8.95423030	-2.41902248		4.00000000	8.58500000	76.87206713	0.104755
5	-0.25998935	8.95450210	-2.32807518		5.00000000	6.86800000	61.49952042	0.126149
6	-0.24980591	8.94601250	-2.23476679		6.00000000	5.72333333	51.20101154	0.147512
7	-0.24001102	8.96690850	-2.15215686		7.00000000	4.90571429	43.98909113	0.168907
8	-0.22983503	8.93413830	-2.05337794		8.00000000	4.29250000	38.34978865	0.190411
9	-0.22006097	8.95974730	-1.97169068		9.00000000	3.81555556	34.18641359	0.211796
10	-0.20990212	8.94897650	-1.87840914		10.00000000	3.43400000	30.73078530	0.233150
11	-0.20005883	8.95670990	-1.79186890		11.00000000	3.12181818	27.96121982	0.254543
12	-0.18990295	8.94451710	-1.69859018		12.00000000	2.86166667	25.59622643	0.276037
13	-0.18010955	8.95269300	-1.61246551		13.00000000	2.64153846	23.64888289	0.297426
14	-0.16996929	8.94830700	-1.52093739		14.00000000	2.45285714	21.94891874	0.318793
15	-0.16014163	8.95776180	-1.43451058		15.00000000	2.28933333	20.50730268	0.340155
16	-0.15000957	8.94527150	-1.34187633		16.00000000	2.14625000	19.19878896	0.361638
17	-0.13984923	8.95688720	-1.25261378		17.00000000	2.02000000	18.09291214	0.383022
18	-0.13004911	8.95524790	-1.16462202		18.00000000	1.90777778	17.08462294	0.404397
19	-0.11987611	8.95276170	-1.07322225		19.00000000	1.80736842	16.18093878	0.425763
20	-0.11006410	8.94337270	-0.98434427		20.00000000	1.71700000	15.35577093	0.447251
21	-0.09987918	8.96258450	-0.89517562		21.00000000	1.63523810	14.65595961	0.468630
22	-0.09008056	8.96199890	-0.80730187		22.00000000	1.56090909	13.98886556	0.490028
23	-0.07992394	8.94173720	-0.71465882		23.00000000	1.49304348	13.35040241	0.511505
24	-0.07012308	8.96195220	-0.62843966		24.00000000	1.43083333	12.82305994	0.532956
25	-0.05997613	8.94670010	-0.53658842		25.00000000	1.37360000	12.28918726	0.554342
26	-0.04982769	8.95252320	-0.44608352		26.00000000	1.32076923	11.82421718	0.575726
27	-0.04001492	8.94083210	-0.35776671		27.00000000	1.27185185	11.37141386	0.597084
28	-0.02987765	8.95296190	-0.26749344		28.00000000	1.22642857	10.98016827	0.618569
29	-0.02005447	8.95080570	-0.17950362		29.00000000	1.18413793	10.59898854	0.639949
30	-0.00993133	8.94910810	-0.08887655		30.00000000	1.14466667	10.24374574	0.661362
31	-0.00067530	8.93456080	-0.00603350		31.00000000	1.10774194	9.89718767	0.682833
32	0.00947219	8.95595070	0.08483247		32.00000000	1.07312500	9.61085459	0.704310
33	0.01928244	8.94114590	0.17240713		33.00000000	1.04060606	9.30421061	0.725696
34	0.02943208	8.94596960	0.26329850		34.00000000	1.01000000	9.03542930	0.747083
35	0.03927806	8.95061400	0.35156272		35.00000000	0.98114286	8.78183099	0.768462
36	0.04941355	8.94637970	0.44207242		36.00000000	0.95388889	8.53385219	0.789950
37	0.05921934	8.94082740	0.52946992		37.00000000	0.92810811	8.29805440	0.811321
38	0.06937121	8.95259670	0.62105246		38.00000000	0.90368421	8.09032028	0.832710
39	0.07954095	8.95145800	0.71200744		39.00000000	0.88051282	7.88187353	0.854203
40	0.08932887	8.93990420	0.79859154		40.00000000	0.85850000	7.67490776	0.875575
41	0.09949414	8.95905300	0.89137325		41.00000000	0.83756098	7.50375317	0.896930
42	0.10931406	8.94026470	0.97729663		42.00000000	0.81761905	7.30973071	0.918309
43	0.11948008	8.95206930	1.06959396		43.00000000	0.79860465	7.14916418	0.939800
44	0.12929480	8.94534020	1.15658597		44.00000000	0.78045455	6.98143142	0.961201
45	0.13944815	8.94422340	1.24725541		45.00000000	0.76311111	6.82543626	0.982563
46	0.14925766	8.94753270	1.33548779		46.00000000	0.74652174	6.67952767	1.003940
47	0.15942813	8.94811060	1.42658054		47.00000000	0.73063830	6.53783230	1.025439
48	0.16957332	8.94452760	1.51675324		48.00000000	0.71541667	6.39906412	1.046827
49	0.17938505	8.94060710	1.60381125		49.00000000	0.70081633	6.26572342	1.068175
50	0.18951906	8.94930550	1.69606397		50.00000000	0.68680000	6.14638302	1.089556
51	0.19933304	8.95552160	1.78513135		51.00000000	0.67333333	6.03005121	1.111037
52	0.20946631	8.93845940	1.87230611		52.00000000	0.66038462	5.90282107	1.132422
53	0.21928102	8.94594570	1.96167610		53.00000000	0.64792453	5.79629765	1.153798
54	0.22943735	8.94566730	2.05247020		54.00000000	0.63592593	5.68878176	1.175174
55	0.23924984	8.95476440	2.14242595		55.00000000	0.62436364	5.59102926	1.196653
56	0.24939874	8.94281480	2.23032674		56.00000000	0.61321429	5.48386179	1.218038
57	0.25955209	8.94604300	2.32196416		57.00000000	0.60245614	5.38959854	1.239395
58	0.26936978	8.95272830	2.41159445		58.00000000	0.59206897	5.30063258	1.260780
59	0.27952686	8.94654460	2.50079952		59.00000000	0.58203390	5.20719223	1.282264
60	0.28932074	8.94916340	2.58917858		60.00000000	0.57233333	5.12190452	1.303634
61	0.29948825	8.94414040	2.67866496		61.00000000	0.56295082	5.03511117	1.325043
62	0.30929181	8.95109750	2.76850115		62.00000000	0.55387097	4.95775303	1.346406
63	0.31942508	8.93308730	2.85345213		63.00000000	0.54507937	4.86924155	1.367887
64	0.32925540	8.95180890	2.94743142		64.00000000	0.53656250	4.80320496	1.389280
65	0.33941028	8.94420340	3.03575458		65.00000000	0.52830769	4.72529146	1.410662
66	0.34923169	8.93616490	3.12079197		66.00000000	0.52030303	4.64951368	1.432004
67	0.35937983	8.95183370	3.21710847		67.00000000	0.51253731	4.58814879	1.453481
68	0.36954585	8.94546510	3.30575950		68.00000000	0.50500000	4.51745988	1.474865
69	0.37933898	8.94061850	3.39152510		69.00000000	0.49768116	4.44957738	1.496295
70	0.38949904	8.93581100	3.48048981		70.00000000	0.49057143	4.38365357	1.517794
71	0.39931971	8.93817230	3.56918837		71.00000000	0.48366197	4.32305404	1.539172
72	0.40948573	8.94886490	3.66443248		72.00000000	0.47694444	4.26811140	1.560535
73	0.41928852	8.94373610	3.75000587		73.00000000	0.47041096	4.20723147	1.581914
74	0.42942476	8.94014640	3.83912022		74.00000000	0.46405405	4.14871118	1.603420
75	0.43925363	8.93994810	3.92690465		75.00000000	0.45786667	4.09330424	1.624821
76	0.44943452	8.93187710	4.01429390		76.00000000	0.45184211	4.03579815	1.646172
77	0.45955440	8.93016340	4.10389588		77.00000000	0.44597403	3.98262092	1.667555
78	0.46943682	8.91965100	4.18721260		78.00000000	0.44025641	3.92693353	1.689053
79	0.47953364	8.90987680	4.27258565		79.00000000	0.43468354	3.87297683	1.710444
80	0.48935878	8.90715980	4.35879685		80.00000000	0.42925000	3.82339834	1.731801
81	0.49952775	8.88822650	4.43991579		81.00000000	0.42395062	3.76816911	1.753186
82	0.50934470	8.87083340	4.51831198		82.00000000	0.41878049	3.71493194	1.774680
83	0.51948023	8.82680510	4.58535074		83.00000000	0.41373494	3.65195768	1.796055
84	0.52923912	8.79210280	4.65312475		84.00000000	0.40880952	3.59429536	1.817418
85	0.53939617	8.72238060	4.70481869		85.00000000	0.40400000	3.52384176	1.838800
86	0.54953241	8.61316300	4.73321222		86.00000000	0.39930233	3.43925602	1.860282
87	0.55937022	8.48726940	4.74752575		87.00000000	0.39471264	3.35003254	1.881676
88	0.56945658	8.28518100	4.71805084		88.00000000	0.39022727	3.23310359	1.903028
89	0.57929510	8.03052230	4.65204222		89.00000000	0.38584270	3.09851838	1.924406
90	0.58940083	7.64930730	4.50850807		90.00000000	0.38155556	2.91863570	1.945900
91	0.59920812	7.15532350	4.28752794		91.00000000	0.37736264	2.70015175	1.967284
92	0.60930419	6.46389870	3.93848056		92.00000000	0.37326087	2.41272045	1.988808
93	0.61910474	5.61808350	3.47818212		93.00000000	0.36924731	2.07446223	2.010241
94	0.62918741	4.48754930	2.82350952		94.00000000	0.36531915	1.63938769	2.031748
95	0.63932145	3.10506200	1.98513274		95.00000000	0.36147368	1.12239820	2.053149
96	0.64905876	1.44913570	0.94057422		96.00000000	0.35770833	0.51836792	2.074534
97	0.65914810	-0.56585389	-0.37298152		97.00000000	0.35402062	-0.20032394	2.095902
98	0.66890550	-2.87026950	-1.91993906		98.00000000	0.35040816	-1.00576586	2.117389
99	0.67894202	-5.63958690	-3.82895252		99.00000000	0.34686869	-1.95619610	2.138773
100	0.68896514	-8.78026010	-6.04929313		100.00000000	0.34340000	-3.01514132	2.160164
101	0.69249374	-10.00015800	-6.92504681		101.00000000	0.34000000	-3.40005372	2.181649
12:04 02/04/2018
Test Lot:	JK-PERC
Recipe:	Recipe_YJX-LID
Cell Name:	1-0-after
Test Order:	3
Test Condition:	Light
1	-0.29992366	8.96310520	-2.68824732		1.00000000	34.34000000	307.79303257	0.000000
2	-0.29003870	8.94651790	-2.59483642		2.00000000	17.17000000	153.61171234	0.021608
3	-0.27990738	8.94856740	-2.50477006		3.00000000	11.44666667	102.43126817	0.043006
4	-0.27011767	8.94409850	-2.41595905		4.00000000	8.58500000	76.78508562	0.064377
5	-0.25995660	8.94160840	-2.32443012		5.00000000	6.86800000	61.41096649	0.085806
6	-0.24983345	8.95274640	-2.23669552		6.00000000	5.72333333	51.23955190	0.107311
7	-0.24000208	8.94314580	-2.14637359		7.00000000	4.90571429	43.87251811	0.128708
8	-0.22984248	8.95320890	-2.05782774		8.00000000	4.29250000	38.43164920	0.150052
9	-0.22005279	8.93975730	-1.96721854		9.00000000	3.81555556	34.11014063	0.171420
10	-0.20990138	8.95235440	-1.87911154		10.00000000	3.43400000	30.74238501	0.192921
11	-0.20006032	8.94132610	-1.78880456		11.00000000	3.12181818	27.91319439	0.214290
12	-0.18992081	8.94012450	-1.69791569		12.00000000	2.86166667	25.58365628	0.235653
13	-0.18014006	8.95500950	-1.61315595		13.00000000	2.64153846	23.65500202	0.257021
14	-0.16999683	8.93535040	-1.51898124		14.00000000	2.45285714	21.91713805	0.278490
15	-0.16016620	8.95333860	-1.43402222		15.00000000	2.28933333	20.49717650	0.299880
16	-0.15001404	8.92820930	-1.33935675		16.00000000	2.14625000	19.16216921	0.321255
17	-0.13988644	8.95792010	-1.25309155		17.00000000	2.02000000	18.09499860	0.342625
18	-0.13005134	8.94505500	-1.16331639		18.00000000	1.90777778	17.06517715	0.364109
19	-0.11991035	8.93720440	-1.07166331		19.00000000	1.80736842	16.15282101	0.385476
20	-0.11009610	8.94057560	-0.98432251		20.00000000	1.71700000	15.35096831	0.406850
21	-0.09993947	8.94150160	-0.89360896		21.00000000	1.63523810	14.62148404	0.428215
22	-0.09011629	8.95158480	-0.80668357		22.00000000	1.56090909	13.97261009	0.449691
23	-0.07996859	8.94438740	-0.71527008		23.00000000	1.49304348	13.35435927	0.471059
24	-0.07014839	8.95018010	-0.62784069		24.00000000	1.43083333	12.80621603	0.492441
25	-0.05998506	8.94523810	-0.53658064		25.00000000	1.37360000	12.28717905	0.513910
26	-0.04982546	8.95129490	-0.44600235		26.00000000	1.32076923	11.82259488	0.535295
27	-0.04000599	8.94451430	-0.35783418		27.00000000	1.27185185	11.37609708	0.556649
28	-0.02985979	8.94361780	-0.26705450		28.00000000	1.22642857	10.96870840	0.578028
29	-0.02004330	8.94941040	-0.17937572		29.00000000	1.18413793	10.59733632	0.599514
30	-0.00991421	8.93989750	-0.08863204		30.00000000	1.14466667	10.23320267	0.620886
31	-0.00065892	8.94437890	-0.00589367		31.00000000	1.10774194	9.90806359	0.642339
32	0.00950047	8.94363310	0.08496874		32.00000000	1.07312500	9.59763627	0.663723
33	0.01927798	8.94793030	0.17249798		33.00000000	1.04060606	9.31127050	0.685226
34	0.02945813	8.93303200	0.26315042		34.00000000	1.01000000	9.02236232	0.706608
35	0.03927434	8.94660190	0.35137184		35.00000000	0.98114286	8.77789455	0.727975
36	0.04941430	8.95074750	0.44229491		36.00000000	0.95388889	8.53801859	0.749356
37	0.05924018	8.94691560	0.53001690		37.00000000	0.92810811	8.30370491	0.770837
38	0.06938982	8.94336220	0.62057829		38.00000000	0.90368421	8.08197521	0.792226
39	0.07952680	8.94244770	0.71116429		39.00000000	0.88051282	7.87393985	0.813586
40	0.08934450	8.95118810	0.79973943		40.00000000	0.85850000	7.68459498	0.834964
41	0.09949191	8.92198090	0.88766491		41.00000000	0.83756098	7.47270303	0.856456
42	0.10926569	8.95651340	0.97863962		42.00000000	0.81761905	7.32301596	0.877827
43	0.11943542	8.94519140	1.06837269		43.00000000	0.79860465	7.14367146	0.899187
44	0.12926875	8.94716740	1.15658915		44.00000000	0.78045455	6.98285747	0.920600
45	0.13942508	8.92971420	1.24502612		45.00000000	0.76311111	6.81436413	0.942079
46	0.14923608	8.96044350	1.33722146		46.00000000	0.74652174	6.68916587	0.963463
47	0.15938646	8.94092560	1.42506248		47.00000000	0.73063830	6.53258266	0.984818
48	0.16953386	8.94598580	1.51664750		48.00000000	0.71541667	6.40010734	1.006169
49	0.17935900	8.93926910	1.60333837		49.00000000	0.70081633	6.26478573	1.027642
50	0.18948409	8.94974610	1.69583450		50.00000000	0.68680000	6.14668562	1.049013
51	0.19927797	8.94676690	1.78289355		51.00000000	0.67333333	6.02415638	1.070391
52	0.20943132	8.94019130	1.87235607		52.00000000	0.66038462	5.90396479	1.091745
53	0.21925795	8.93885330	1.95991465		53.00000000	0.64792453	5.79170231	1.113220
54	0.22940238	8.94603630	2.05224202		54.00000000	0.63592593	5.68901642	1.134606
55	0.23924166	8.94084930	2.13902363		55.00000000	0.62436364	5.58234118	1.155990
56	0.24937789	8.94270990	2.23011413		56.00000000	0.61321429	5.48379746	1.177475
57	0.25952306	8.94133470	2.32048254		57.00000000	0.60245614	5.38676199	1.198858
58	0.26936013	8.93649010	2.40713414		58.00000000	0.59206897	5.29101845	1.220201
59	0.27950379	8.94031810	2.49885279		59.00000000	0.58203390	5.20356820	1.241585
60	0.28935200	8.94011780	2.58684097		60.00000000	0.57233333	5.11672742	1.263065
61	0.29951206	8.94217590	2.67828952		61.00000000	0.56295082	5.03400525	1.284442
62	0.30929852	8.93590930	2.76386352		62.00000000	0.55387097	4.94934073	1.305801
63	0.31946152	8.94041540	2.85611869		63.00000000	0.54507937	4.87323595	1.327192
64	0.32925987	8.93468760	2.94183408		64.00000000	0.53656250	4.79401832	1.348693
65	0.33938867	8.94095230	3.03445791		65.00000000	0.52830769	4.72357388	1.370058
66	0.34924209	8.94449420	3.12379385		66.00000000	0.52030303	4.65384744	1.391417
67	0.35939249	8.93333720	3.21057430		67.00000000	0.51253731	4.57866865	1.412787
68	0.36954212	8.95152470	3.30796541		68.00000000	0.50500000	4.52051997	1.434258
69	0.37936950	8.94048210	3.39174622		69.00000000	0.49768116	4.44950950	1.455643
70	0.38950351	8.93768690	3.48126042		70.00000000	0.49057143	4.38457383	1.476975
71	0.39933830	8.93710230	3.56892724		71.00000000	0.48366197	4.32253652	1.498348
72	0.40945968	8.94099240	3.66097589		72.00000000	0.47694444	4.26435665	1.519825
73	0.41929299	8.93534850	3.74652899		73.00000000	0.47041096	4.20328586	1.541203
74	0.42941880	8.94006820	3.83903336		74.00000000	0.46405405	4.14867489	1.562572
75	0.43924469	8.93439580	3.92438591		75.00000000	0.45786667	4.09076202	1.583949
76	0.44942337	8.92808060	4.01248807		76.00000000	0.45184211	4.03408273	1.605449
77	0.45952314	8.92429920	4.10092199		77.00000000	0.44597403	3.98000564	1.626837
78	0.46938175	8.92959790	4.19139029		78.00000000	0.44025641	3.93131272	1.648194
79	0.47954479	8.92190550	4.27845330		79.00000000	0.43468354	3.87820550	1.669555
80	0.48936993	8.90008160	4.35543231		80.00000000	0.42925000	3.82036003	1.691044
81	0.49949428	8.88316150	4.43708836		81.00000000	0.42395062	3.76602180	1.712433
82	0.50930154	8.86639400	4.51566812		82.00000000	0.41878049	3.71307280	1.733818
83	0.51946306	8.81897830	4.58113345		83.00000000	0.41373494	3.64871946	1.755156
84	0.52925175	8.78682420	4.65044208		84.00000000	0.40880952	3.59213742	1.776641
85	0.53936195	8.70651910	4.69596512		85.00000000	0.40400000	3.51743372	1.798031
86	0.54952872	8.61027050	4.73159093		86.00000000	0.39930233	3.43810103	1.819450
87	0.55933154	8.47447780	4.74004272		87.00000000	0.39471264	3.34498354	1.840943
88	0.56944394	8.27473350	4.71199685		88.00000000	0.39022727	3.22902669	1.862325
89	0.57924747	8.00733380	4.63822785		89.00000000	0.38584270	3.08957127	1.883679
90	0.58938372	7.63256170	4.49850761		90.00000000	0.38155556	2.91224632	1.905040
91	0.59920663	7.12678580	4.27041730		91.00000000	0.37736264	2.68938269	1.926560
92	0.60933989	6.45514630	3.93337814		92.00000000	0.37326087	2.40945352	1.947951
93	0.61910325	5.58955050	3.46050888		93.00000000	0.36924731	2.06392650	1.969291
94	0.62919486	4.48072430	2.81924870		94.00000000	0.36531915	1.63689439	1.990766
95	0.63931698	3.07003310	1.96272429		95.00000000	0.36147368	1.10973618	2.012273
96	0.64907658	1.44395290	0.93723601		96.00000000	0.35770833	0.51651399	2.033661
97	0.65917039	-0.56786335	-0.37431871		97.00000000	0.35402062	-0.20103533	2.055020
98	0.66889882	-2.86986900	-1.91965199		98.00000000	0.35040816	-1.00562553	2.076398
99	0.67893827	-5.62062310	-3.81605612		99.00000000	0.34686869	-1.94961815	2.097901
100	0.68894649	-8.73501110	-6.01795524		100.00000000	0.34340000	-2.99960281	2.119280
101	0.69260162	-9.99985790	-6.92591778		101.00000000	0.34000000	-3.39995169	2.140635
12:05 02/04/2018
Test Lot:	JK-PERC
Recipe:	Recipe_YJX-LID
Cell Name:	1-0-after
Test Order:	4
Test Condition:	Light
1	-0.29991311	8.94230370	-2.68191411		1.00000000	34.34000000	307.07870906	0.000000
2	-0.29011428	8.95189090	-2.59707138		2.00000000	17.17000000	153.70396675	0.061796
3	-0.27994627	8.93741890	-2.50199708		3.00000000	11.44666667	102.30365501	0.083228
4	-0.27011392	8.94587520	-2.41640542		4.00000000	8.58500000	76.80033859	0.104725
5	-0.25997123	8.94162460	-2.32456515		5.00000000	6.86800000	61.41107775	0.126124
6	-0.24985680	8.95231340	-2.23679638		6.00000000	5.72333333	51.23707369	0.147480
7	-0.23997684	8.94888400	-2.14752490		7.00000000	4.90571429	43.90066808	0.168902
8	-0.22988176	8.95470140	-2.05852252		8.00000000	4.29250000	38.43805576	0.190389
9	-0.22001073	8.92376140	-1.96332326		9.00000000	3.81555556	34.04910739	0.211769
10	-0.20988068	8.95250230	-1.87895727		10.00000000	3.43400000	30.74289290	0.233114
11	-0.20006101	8.94304660	-1.78915494		11.00000000	3.12181818	27.91856548	0.254493
12	-0.18992575	8.94300460	-1.69850686		12.00000000	2.86166667	25.59189816	0.275984
13	-0.18012393	8.93840220	-1.61002013		13.00000000	2.64153846	23.61113320	0.297356
14	-0.16996856	8.95526890	-1.52211416		14.00000000	2.45285714	21.96599529	0.318713
15	-0.16019802	8.94536780	-1.43303021		15.00000000	2.28933333	20.47892868	0.340087
16	-0.15001512	8.94883730	-1.34246090		16.00000000	2.14625000	19.20644206	0.361565
17	-0.13987018	8.94420430	-1.25102747		17.00000000	2.02000000	18.06729269	0.382958
18	-0.13007358	8.95108700	-1.16429993		18.00000000	1.90777778	17.07668487	0.404311
19	-0.11991003	8.94927410	-1.07310773		19.00000000	1.80736842	16.17463540	0.425680
20	-0.11010226	8.94405750	-0.98476094		20.00000000	1.71700000	15.35694673	0.447181
21	-0.09993053	8.93939690	-0.89331863		21.00000000	1.63523810	14.61804236	0.468545
22	-0.09011904	8.93925480	-0.80559708		22.00000000	1.56090909	13.95336408	0.489931
23	-0.07996517	8.94882390	-0.71559420		23.00000000	1.49304348	13.36098316	0.511276
24	-0.07014475	8.94542600	-0.62747467		24.00000000	1.43083333	12.79941370	0.532750
25	-0.06001619	8.93576150	-0.53629032		25.00000000	1.37360000	12.27416200	0.554134
26	-0.04987273	8.94791600	-0.44625703		26.00000000	1.32076923	11.81813213	0.575521
27	-0.04002775	8.94884590	-0.35820219		27.00000000	1.27185185	11.38160623	0.596949
28	-0.02988207	8.93474200	-0.26698857		28.00000000	1.22642857	10.95782287	0.618400
29	-0.02006835	8.97111990	-0.18003554		29.00000000	1.18413793	10.62304336	0.639770
30	-0.00991671	8.92738720	-0.08853030		30.00000000	1.14466667	10.21888255	0.661168
31	-0.00065526	8.95099350	-0.00586527		31.00000000	1.10774194	9.91539086	0.682648
32	0.00948277	8.94292640	0.08480370		32.00000000	1.07312500	9.59687789	0.704149
33	0.01930738	8.93858530	0.17258062		33.00000000	1.04060606	9.30154604	0.725531
34	0.02945277	8.93542290	0.26317295		34.00000000	1.01000000	9.02477713	0.746900
35	0.03928035	8.95226670	0.35164818		35.00000000	0.98114286	8.78345253	0.768267
36	0.04943542	8.94250870	0.44207669		36.00000000	0.95388889	8.53015969	0.789747
37	0.05925184	8.94733050	0.53014580		37.00000000	0.92810811	8.30408998	0.811124
38	0.06937937	8.92814160	0.61942888		38.00000000	0.90368421	8.06822059	0.832498
39	0.07954858	8.95388510	0.71226886		39.00000000	0.88051282	7.88401062	0.853852
40	0.08936426	8.94919400	0.79973810		40.00000000	0.85850000	7.68288305	0.875324
41	0.09949849	8.95116330	0.89062721		41.00000000	0.83756098	7.49714507	0.896687
42	0.10932309	8.94898220	0.97833039		42.00000000	0.81761905	7.31685830	0.918082
43	0.11950719	8.94142720	1.06856484		43.00000000	0.79860465	7.14066535	0.939561
44	0.12931319	8.94892020	1.15721342		44.00000000	0.78045455	6.98422545	0.960945
45	0.13944444	8.93802830	1.24635835		45.00000000	0.76311111	6.82070871	0.982312
46	0.14926384	8.95219990	1.33623973		46.00000000	0.74652174	6.68301184	1.003690
47	0.15942709	8.93204500	1.42400994		47.00000000	0.73063830	6.52609416	1.025196
48	0.16956356	8.94448660	1.51665899		48.00000000	0.71541667	6.39903479	1.046591
49	0.17937477	8.94044780	1.60369077		49.00000000	0.70081633	6.26561178	1.067932
50	0.18948294	8.95232200	1.69631229		50.00000000	0.68680000	6.14845475	1.089314
51	0.19929044	8.92750930	1.77916726		51.00000000	0.67333333	6.01118960	1.110801
52	0.20943435	8.95876980	1.87627413		52.00000000	0.66038462	5.91623375	1.132195
53	0.21925150	8.92763420	1.95739719		53.00000000	0.64792453	5.78443318	1.153561
54	0.22937977	8.95560740	2.05423517		54.00000000	0.63592593	5.69510293	1.174942
55	0.23920067	8.94324970	2.13923132		55.00000000	0.62436364	5.58383990	1.196417
56	0.24937136	8.93251610	2.22751369		56.00000000	0.61321429	5.47754648	1.217801
57	0.25951824	8.95609470	2.32426993		57.00000000	0.60245614	5.39565425	1.239149
58	0.26935029	8.93628600	2.40699123		58.00000000	0.59206897	5.29089761	1.260513
59	0.27947560	8.94343850	2.49947284		59.00000000	0.58203390	5.20538437	1.282008
60	0.28932476	8.93182660	2.58419859		60.00000000	0.57233333	5.11198209	1.303381
61	0.29946047	8.95061300	2.68035478		61.00000000	0.56295082	5.03875492	1.324724
62	0.30928805	8.93446160	2.76332221		62.00000000	0.55387097	4.94853889	1.346103
63	0.31941187	8.94417100	2.85687438		63.00000000	0.54507937	4.87528305	1.367579
64	0.32926401	8.94464680	2.94515027		64.00000000	0.53656250	4.79936205	1.388965
65	0.33939824	8.94978810	3.03754233		65.00000000	0.52830769	4.72824190	1.410327
66	0.34922063	8.94249920	3.12290520		66.00000000	0.52030303	4.65280943	1.431676
67	0.35937718	8.94646260	3.21515450		67.00000000	0.51253731	4.58539591	1.453158
68	0.36955085	8.95250510	3.30840587		68.00000000	0.50500000	4.52101508	1.474523
69	0.37936357	8.93677330	3.39028622		69.00000000	0.49768116	4.44766370	1.495900
70	0.38950077	8.94554810	3.48429787		70.00000000	0.49057143	4.38843031	1.517264
71	0.39933431	8.94005580	3.57007101		71.00000000	0.48366197	4.32396502	1.538736
72	0.40948340	8.94574170	3.66313273		72.00000000	0.47694444	4.26662181	1.560110
73	0.41928568	8.94435790	3.75024118		73.00000000	0.47041096	4.20752398	1.581546
74	0.42944747	8.93302150	3.83626348		74.00000000	0.46405405	4.14540484	1.603042
75	0.43925717	8.93688010	3.92558866		75.00000000	0.45786667	4.09189950	1.624440
76	0.44943085	8.92101100	4.00937756		76.00000000	0.45184211	4.03088839	1.645802
77	0.45957252	8.92146110	4.10005836		77.00000000	0.44597403	3.97873992	1.667186
78	0.46944404	8.92023470	4.18755102		78.00000000	0.44025641	3.92719051	1.688662
79	0.47956783	8.91085240	4.27335815		79.00000000	0.43468354	3.87340090	1.710044
80	0.48935971	8.89654920	4.35361274		80.00000000	0.42925000	3.81884374	1.731386
81	0.49949989	8.88634200	4.43872685		81.00000000	0.42395062	3.76737018	1.752771
82	0.50932896	8.85530470	4.51026313		82.00000000	0.41878049	3.70842882	1.774250
83	0.51944381	8.83054920	4.58697412		83.00000000	0.41373494	3.65350674	1.795620
84	0.52925873	8.78271680	4.64832954		84.00000000	0.40880952	3.59045827	1.816979
85	0.53940338	8.72795680	4.70788940		85.00000000	0.40400000	3.52609455	1.838343
86	0.54953241	8.60172750	4.72692804		86.00000000	0.39930233	3.43468979	1.859820
87	0.55934662	8.46836950	4.73675386		87.00000000	0.39471264	3.34257251	1.881216
88	0.56945556	8.29591750	4.72415635		88.00000000	0.39022727	3.23729326	1.902572
89	0.57927865	8.00073240	4.63465346		89.00000000	0.38584270	3.08702416	1.923945
90	0.58938462	7.63073920	4.49744032		90.00000000	0.38155556	2.91155093	1.945432
91	0.59921145	7.13605980	4.27600874		91.00000000	0.37736264	2.69288235	1.966808
92	0.60932708	6.44137330	3.92490318		92.00000000	0.37326087	2.40431260	1.988262
93	0.61908764	5.61017470	3.47318982		93.00000000	0.36924731	2.07154193	2.009659
94	0.62921745	4.47723770	2.81715609		94.00000000	0.36531915	1.63562067	2.031148
95	0.63934642	3.10300420	1.98389463		95.00000000	0.36147368	1.12165436	2.052535
96	0.64908993	1.44067850	0.93512991		96.00000000	0.35770833	0.51534271	2.073897
97	0.65915716	-0.57367224	-0.37814016		97.00000000	0.35402062	-0.20309180	2.095248
98	0.66894978	-2.87555720	-1.92360336		98.00000000	0.35040816	-1.00761872	2.116715
99	0.67896789	-5.65096330	-3.83682263		99.00000000	0.34686869	-1.96014222	2.138102
100	0.68894583	-8.78900050	-6.05514524		100.00000000	0.34340000	-3.01814277	2.159526
101	0.69243205	-10.00019300	-6.92445414		101.00000000	0.34000000	-3.40006562	2.180898
