# Supplementary material for: Study on the Electrical Injection Regeneration of Industrialized B-Doped Czochralski Silicon PERC Solar Cells
Source: Hindawi journal article supplement (doi:10.1155/2019/5357370), 2019-06-20
Supplement: f1 [file 5357370.f1.zip › section3.2/IVRawData_1-0.csv]

11:27 02/04/2018
Test Lot:	JK-PERC
Recipe:	Recipe_YJX-LID
Cell Name:	1-0
Test Order:	2
Test Condition:	Light
1	-0.29987407	8.94668200	-2.68287794		1.00000000	34.34000000	307.22905988	0.000000
2	-0.29007089	8.95151810	-2.59657482		2.00000000	17.17000000	153.69756578	0.061778
3	-0.27994168	8.94931220	-2.50528549		3.00000000	11.44666667	102.43979365	0.083198
4	-0.27012733	8.96857260	-2.42265657		4.00000000	8.58500000	76.99519577	0.104723
5	-0.25995123	8.95189860	-2.32705705		5.00000000	6.86800000	61.48163958	0.126192
6	-0.24983247	8.95156670	-2.23639202		6.00000000	5.72333333	51.23280008	0.147566
7	-0.23998238	8.96392820	-2.15118482		7.00000000	4.90571429	43.97447063	0.168938
8	-0.22983085	8.94325920	-2.05543686		8.00000000	4.29250000	38.38894012	0.190296
9	-0.21999937	8.94271370	-1.96739138		9.00000000	3.81555556	34.12142094	0.211784
10	-0.20985827	8.95232960	-1.87872040		10.00000000	3.43400000	30.74229985	0.233172
11	-0.20002605	8.94505980	-1.78924498		11.00000000	3.12181818	27.92485032	0.254582
12	-0.18988344	8.96011640	-1.70137772		12.00000000	2.86166667	25.64086643	0.275997
13	-0.18007356	8.93975830	-1.60981410		13.00000000	2.64153846	23.61471539	0.297487
14	-0.16994436	8.95579910	-1.52198755		14.00000000	2.45285714	21.96729579	0.318866
15	-0.16010916	8.94380860	-1.43198568		15.00000000	2.28933333	20.47535915	0.340251
16	-0.14999634	8.95342250	-1.34298061		16.00000000	2.14625000	19.21628304	0.361621
17	-0.13982768	8.95390130	-1.25200325		17.00000000	2.02000000	18.08688063	0.383094
18	-0.12999547	8.94386480	-1.16266191		18.00000000	1.90777778	17.06290651	0.404461
19	-0.11986999	8.94254970	-1.07194334		19.00000000	1.80736842	16.16248193	0.425846
20	-0.11004819	8.95271300	-0.98522986		20.00000000	1.71700000	15.37180822	0.447334
21	-0.09989294	8.94824890	-0.89386693		21.00000000	1.63523810	14.63251749	0.468702
22	-0.09005997	8.94691750	-0.80575915		22.00000000	1.56090909	13.96532486	0.490069
23	-0.07994045	8.95815560	-0.71611902		23.00000000	1.49304348	13.37491580	0.511442
24	-0.07011121	8.94750310	-0.62732025		24.00000000	1.43083333	12.80238569	0.532925
25	-0.05994182	8.94380470	-0.53610790		25.00000000	1.37360000	12.28521014	0.554311
26	-0.04980667	8.96514990	-0.44652423		26.00000000	1.32076923	11.84089414	0.575652
27	-0.03999082	8.94138810	-0.35757344		27.00000000	1.27185185	11.37212101	0.597029
28	-0.02985716	8.96266270	-0.26759961		28.00000000	1.22642857	10.99206561	0.618512
29	-0.02004354	8.94507310	-0.17929094		29.00000000	1.18413793	10.59220035	0.639884
30	-0.00988680	8.94809530	-0.08846806		30.00000000	1.14466667	10.24258642	0.661239
31	-0.00069394	8.94040870	-0.00620408		31.00000000	1.10774194	9.90366564	0.682724
32	0.00946334	8.96637920	0.08485187		32.00000000	1.07312500	9.62204568	0.704211
33	0.01929156	8.94629000	0.17258786		33.00000000	1.04060606	9.30956359	0.725598
34	0.02943907	8.95171830	0.26353029		34.00000000	1.01000000	9.04123548	0.746957
35	0.03927176	8.95246120	0.35157892		35.00000000	0.98114286	8.78364336	0.768329
36	0.04940811	8.95325570	0.44236346		36.00000000	0.95388889	8.54041113	0.789799
37	0.05923931	8.96307850	0.53096658		37.00000000	0.92810811	8.31870583	0.811180
38	0.06938087	8.95115760	0.62103912		38.00000000	0.90368421	8.08901979	0.832533
39	0.07953732	8.94923020	0.71179776		39.00000000	0.88051282	7.87991192	0.853907
40	0.08934098	8.94546890	0.79919693		40.00000000	0.85850000	7.67968505	0.875401
41	0.09945947	8.95499320	0.89065887		41.00000000	0.83756098	7.50035284	0.896786
42	0.10930257	8.95497320	0.97880159		42.00000000	0.81761905	7.32175666	0.918149
43	0.11947316	8.95254800	1.06958920		43.00000000	0.79860465	7.14954647	0.939514
44	0.12930807	8.93616960	1.15551884		44.00000000	0.78045455	6.97427418	0.960993
45	0.13946229	8.97499560	1.25167344		45.00000000	0.76311111	6.84891886	0.982375
46	0.14925851	8.94823270	1.33559988		46.00000000	0.74652174	6.68005024	1.003753
47	0.15941198	8.95221610	1.42709049		47.00000000	0.73063830	6.54083193	1.025116
48	0.16957662	8.95095250	1.51787227		48.00000000	0.71541667	6.40366060	1.046603
49	0.17936836	8.94979100	1.60530933		49.00000000	0.70081633	6.27215965	1.067978
50	0.18953970	8.95666690	1.69764396		50.00000000	0.68680000	6.15143883	1.089370
51	0.19930987	8.95061400	1.78394571		51.00000000	0.67333333	6.02674676	1.110850
52	0.20943877	8.95276360	1.87505580		52.00000000	0.66038462	5.91226735	1.132245
53	0.21928857	8.95013810	1.96266299		53.00000000	0.64792453	5.79901401	1.153595
54	0.22942270	8.94905380	2.05311609		54.00000000	0.63592593	5.69093532	1.174972
55	0.23924868	8.94905660	2.14104998		55.00000000	0.62436364	5.58746552	1.196455
56	0.24941184	8.95029160	2.23230870		56.00000000	0.61321429	5.48844667	1.217829
57	0.25953254	8.94256310	2.32088612		57.00000000	0.60245614	5.38750205	1.239185
58	0.26937491	8.94955730	2.41078619		58.00000000	0.59206897	5.29875513	1.260560
59	0.27950159	8.96128270	2.50469276		59.00000000	0.58203390	5.21577030	1.282045
60	0.28932461	8.95032690	2.58954984		60.00000000	0.57233333	5.12257043	1.303428
61	0.29947808	8.95560550	2.68200754		61.00000000	0.56295082	5.04156546	1.324785
62	0.30929065	8.94280050	2.76592458		62.00000000	0.55387097	4.95315757	1.346175
63	0.31943819	8.95519160	2.86063020		63.00000000	0.54507937	4.88129015	1.367649
64	0.32925746	8.94804190	2.94620955		64.00000000	0.53656250	4.80118373	1.389033
65	0.33938861	8.95022680	3.03760503		65.00000000	0.52830769	4.72847367	1.410383
66	0.34921458	8.95530700	3.12732377		66.00000000	0.52030303	4.65947337	1.431767
67	0.35935989	8.94953920	3.21610542		67.00000000	0.51253731	4.58697278	1.453246
68	0.36952749	8.94656660	3.30600230		68.00000000	0.50500000	4.51801613	1.474614
69	0.37934381	8.94319440	3.39254544		69.00000000	0.49768116	4.45085936	1.495973
70	0.38948238	8.94529340	3.48403416		70.00000000	0.49057143	4.38830536	1.517354
71	0.39929423	8.95094110	3.57405913		71.00000000	0.48366197	4.32922982	1.538829
72	0.40946704	8.93525700	3.65869324		72.00000000	0.47694444	4.26162119	1.560212
73	0.41926923	8.95294000	3.75369226		73.00000000	0.47041096	4.21156109	1.581562
74	0.42944130	8.94583420	3.84171067		74.00000000	0.46405405	4.15135063	1.602924
75	0.43924645	8.94165710	3.92759114		75.00000000	0.45786667	4.09408673	1.624400
76	0.44943938	8.93968770	4.01784770		76.00000000	0.45184211	4.03932731	1.645781
77	0.45956531	8.94263170	4.10972331		77.00000000	0.44597403	3.98818146	1.667166
78	0.46943000	8.92272760	4.18859602		78.00000000	0.44025641	3.92828802	1.688524
79	0.47956112	8.92184640	4.27857065		79.00000000	0.43468354	3.87817981	1.709998
80	0.48938340	8.92289450	4.36671645		80.00000000	0.42925000	3.83015246	1.731383
81	0.49951380	8.89031510	4.44083508		81.00000000	0.42395062	3.76905457	1.752765
82	0.50931966	8.87950710	4.52250754		82.00000000	0.41878049	3.71856431	1.774254
83	0.51947761	8.83746050	4.59086286		83.00000000	0.41373494	3.65636619	1.795643
84	0.52925301	8.79942890	4.65712423		84.00000000	0.40880952	3.59729034	1.816997
85	0.53940421	8.74782470	4.71861347		85.00000000	0.40400000	3.53412118	1.838386
86	0.54956591	8.65261650	4.75518306		86.00000000	0.39930233	3.45500989	1.859860
87	0.55936658	8.52684020	4.76962944		87.00000000	0.39471264	3.36565164	1.881250
88	0.56948060	8.34215160	4.75069350		88.00000000	0.39022727	3.25533507	1.902595
89	0.57927758	8.10154150	4.69304135		89.00000000	0.38584270	3.12592062	1.923979
90	0.58941096	7.74727250	4.56632732		90.00000000	0.38155556	2.95601486	1.945459
91	0.59921014	7.29262350	4.36981395		91.00000000	0.37736264	2.75196364	1.966826
92	0.60933161	6.65538880	4.05533877		92.00000000	0.37326087	2.48419621	1.988299
93	0.61910623	5.84718510	3.62002872		93.00000000	0.36924731	2.15905738	2.009699
94	0.62921876	4.78299430	3.00954974		94.00000000	0.36531915	1.74731941	2.031266
95	0.63933873	3.43060990	2.19332178		95.00000000	0.36147368	1.24007520	2.052644
96	0.64914536	1.82691170	1.18593125		96.00000000	0.35770833	0.65350154	2.073990
97	0.65918797	-0.16005588	-0.10550691		97.00000000	0.35402062	-0.05666308	2.095419
98	0.66892982	-2.46484800	-1.64881033		98.00000000	0.35040816	-0.86370286	2.116908
99	0.67899173	-5.27028990	-3.57848326		99.00000000	0.34686869	-1.82809854	2.138303
100	0.68893456	-8.45864870	-5.82745542		100.00000000	0.34340000	-2.90469996	2.159660
101	0.69317102	-10.00024800	-6.93188211		101.00000000	0.34000000	-3.40008432	2.181039
11:28 02/04/2018
Test Lot:	JK-PERC
Recipe:	Recipe_YJX-LID
Cell Name:	1-0
Test Order:	3
Test Condition:	Light
1	-0.29987407	8.95273490	-2.68469305		1.00000000	34.34000000	307.43691647	0.000000
2	-0.29001433	8.94779490	-2.59498874		2.00000000	17.17000000	153.63363843	0.021597
3	-0.27988884	8.95951560	-2.50766843		3.00000000	11.44666667	102.55658857	0.042984
4	-0.27009532	8.94063570	-2.41482386		4.00000000	8.58500000	76.75535748	0.064328
5	-0.25996614	8.95200540	-2.32721829		5.00000000	6.86800000	61.48237309	0.085697
6	-0.24977367	8.94929700	-2.23529876		6.00000000	5.72333333	51.21980983	0.107194
7	-0.23996079	8.95110420	-2.14791404		7.00000000	4.90571429	43.91155975	0.128564
8	-0.22982416	8.94731620	-2.05630943		8.00000000	4.29250000	38.40635479	0.149925
9	-0.21997482	8.95914170	-1.97078558		9.00000000	3.81555556	34.18410289	0.171303
10	-0.20985082	8.94519330	-1.87715615		10.00000000	3.43400000	30.71779379	0.192823
11	-0.20000669	8.94131470	-1.78832276		11.00000000	3.12181818	27.91315880	0.214227
12	-0.18987601	8.96526340	-1.70228844		12.00000000	2.86166667	25.65559543	0.235581
13	-0.18010259	8.92609020	-1.60761196		13.00000000	2.64153846	23.57861057	0.256962
14	-0.16998082	8.96506600	-1.52388927		14.00000000	2.45285714	21.99002617	0.278449
15	-0.16013595	8.93502810	-1.43081921		15.00000000	2.28933333	20.45525766	0.299830
16	-0.15002759	8.95038890	-1.34280528		16.00000000	2.14625000	19.20977218	0.321222
17	-0.13984779	8.94324590	-1.25069317		17.00000000	2.02000000	18.06535672	0.342569
18	-0.13003269	8.94744300	-1.16346008		18.00000000	1.90777778	17.06973292	0.364056
19	-0.11988711	8.94497490	-1.07238719		19.00000000	1.80736842	16.16686516	0.385444
20	-0.11005861	8.95578380	-0.98566112		20.00000000	1.71700000	15.37708078	0.406825
21	-0.09991750	8.94259360	-0.89352160		21.00000000	1.63523810	14.62326972	0.428223
22	-0.09012026	8.95257950	-0.80680882		22.00000000	1.56090909	13.97416273	0.449689
23	-0.07993822	8.94307900	-0.71489380		23.00000000	1.49304348	13.35240578	0.471060
24	-0.07011940	8.94934750	-0.62752284		24.00000000	1.43083333	12.80502471	0.492450
25	-0.05998424	8.93983170	-0.53624905		25.00000000	1.37360000	12.27975282	0.513817
26	-0.04981560	8.94263650	-0.44548279		26.00000000	1.32076923	11.81115913	0.535306
27	-0.03999975	8.94984440	-0.35799154		27.00000000	1.27185185	11.38287617	0.556704
28	-0.02987800	8.94907000	-0.26738028		28.00000000	1.22642857	10.97539514	0.578065
29	-0.02004652	8.93964960	-0.17920884		29.00000000	1.18413793	10.58577818	0.599424
30	-0.00986969	8.94629960	-0.08829716		30.00000000	1.14466667	10.24053094	0.620898
31	-0.00063960	8.95289040	-0.00572630		31.00000000	1.10774194	9.91749214	0.642399
32	0.00948343	8.94460580	0.08482557		32.00000000	1.07312500	9.59868010	0.663789
33	0.01930942	8.96291830	0.17306875		33.00000000	1.04060606	9.32686710	0.685150
34	0.02943833	8.93779850	0.26311386		34.00000000	1.01000000	9.02717649	0.706633
35	0.03927102	8.95377160	0.35162371		35.00000000	0.98114286	8.78492905	0.728017
36	0.04942448	8.94255160	0.44198100		36.00000000	0.95388889	8.53020061	0.749409
37	0.05925345	8.95631600	0.53069262		37.00000000	0.92810811	8.31242950	0.770895
38	0.06939873	8.93899540	0.62035494		38.00000000	0.90368421	8.07802900	0.792268
39	0.07955816	8.94481280	0.71163281		39.00000000	0.88051282	7.87602235	0.813623
40	0.08935958	8.94086270	0.79895174		40.00000000	0.85850000	7.67573063	0.835009
41	0.09950859	8.94039540	0.88964615		41.00000000	0.83756098	7.48812629	0.856483
42	0.10932788	8.95212750	0.97871712		42.00000000	0.81761905	7.31942996	0.877914
43	0.11947614	8.94011210	1.06813008		43.00000000	0.79860465	7.13961510	0.899269
44	0.12929095	8.94257160	1.15619358		44.00000000	0.78045455	6.97927065	0.920653
45	0.13945635	8.94252680	1.24709215		45.00000000	0.76311111	6.82414156	0.942155
46	0.14925182	8.94497970	1.33505450		46.00000000	0.74652174	6.67762180	0.963539
47	0.15940453	8.94867320	1.42645905		47.00000000	0.73063830	6.53824336	0.984905
48	0.16953941	8.94096090	1.51584524		48.00000000	0.71541667	6.39651244	1.006280
49	0.17936316	8.94481950	1.60437109		49.00000000	0.70081633	6.26867554	1.027751
50	0.18948388	8.94799520	1.69550085		50.00000000	0.68680000	6.14548310	1.049134
51	0.19929349	8.94907380	1.78349215		51.00000000	0.67333333	6.02570969	1.070481
52	0.20943283	8.93719960	1.87174300		52.00000000	0.66038462	5.90198912	1.091851
53	0.21924913	8.93695930	1.95942055		53.00000000	0.64792453	5.79047514	1.113336
54	0.22940856	8.95034690	2.05328619		54.00000000	0.63592593	5.69175764	1.134711
55	0.23923677	8.94280340	2.13944740		55.00000000	0.62436364	5.58356125	1.156051
56	0.24936867	8.92471310	2.22554384		56.00000000	0.61321429	5.47276157	1.177431
57	0.25951245	8.94963460	2.32254160		57.00000000	0.60245614	5.39176232	1.198918
58	0.26932281	8.94488330	2.40906111		58.00000000	0.59206897	5.29598780	1.220303
59	0.27948374	8.95241640	2.50205482		59.00000000	0.58203390	5.21060982	1.241676
60	0.28930375	8.93448930	2.58478126		60.00000000	0.57233333	5.11350604	1.263047
61	0.29945424	8.96083070	2.68335875		61.00000000	0.56295082	5.04450699	1.284524
62	0.30929810	8.93646530	2.76403174		62.00000000	0.55387097	4.94964868	1.305895
63	0.31942552	8.94477940	2.85719081		63.00000000	0.54507937	4.87561468	1.327270
64	0.32925969	8.94167040	2.94413162		64.00000000	0.53656250	4.79776502	1.348633
65	0.33938265	8.93017200	3.03074544		65.00000000	0.52830769	4.71787856	1.370124
66	0.34922129	8.94277670	3.12300802		66.00000000	0.52030303	4.65295382	1.391547
67	0.35940230	8.94394680	3.21447505		67.00000000	0.51253731	4.58410646	1.412958
68	0.36953494	8.94679550	3.30615354		68.00000000	0.50500000	4.51813173	1.434455
69	0.37936315	8.93757340	3.39058600		69.00000000	0.49768116	4.44806189	1.455836
70	0.38951141	8.94550700	3.48437704		70.00000000	0.49057143	4.38841015	1.477208
71	0.39932400	8.94247630	3.57094541		71.00000000	0.48366197	4.32513572	1.498576
72	0.40947077	8.93861960	3.66010345		72.00000000	0.47694444	4.26322496	1.520048
73	0.41930199	8.93429950	3.74616956		73.00000000	0.47041096	4.20279239	1.541424
74	0.42946437	8.94316390	3.84077025		74.00000000	0.46405405	4.15011146	1.562764
75	0.43925837	8.93046380	3.92278097		75.00000000	0.45786667	4.08896169	1.584138
76	0.44942224	8.95208930	4.02326803		76.00000000	0.45184211	4.04493088	1.605628
77	0.45953998	8.91651250	4.09749398		77.00000000	0.44597403	3.97653298	1.626997
78	0.46939427	8.93180560	4.19253837		78.00000000	0.44025641	3.93228467	1.648363
79	0.47954401	8.92020890	4.27763275		79.00000000	0.43468354	3.87746802	1.669742
80	0.48936331	8.90683170	4.35867664		80.00000000	0.42925000	3.82325751	1.691223
81	0.49949667	8.89724920	4.44414635		81.00000000	0.42395062	3.77199429	1.712623
82	0.50927800	8.87300870	4.51882812		82.00000000	0.41878049	3.71584291	1.733980
83	0.51944411	8.83844850	4.59108001		83.00000000	0.41373494	3.65677496	1.755344
84	0.52922767	8.79564950	4.65490109		84.00000000	0.40880952	3.59574528	1.776845
85	0.53938341	8.73914340	4.71374897		85.00000000	0.40400000	3.53061393	1.798227
86	0.54951900	8.64072990	4.74824525		86.00000000	0.39930233	3.45026354	1.819581
87	0.55931896	8.51482960	4.76250564		87.00000000	0.39471264	3.36091090	1.840961
88	0.56942773	8.31771470	4.73633740		88.00000000	0.39022727	3.24579912	1.862436
89	0.57926714	8.08298590	4.68220812		89.00000000	0.38584270	3.11876108	1.883820
90	0.58937967	7.72145130	4.55086642		90.00000000	0.38155556	2.94616264	1.905175
91	0.59916544	7.25430440	4.34652849		91.00000000	0.37736264	2.73750344	1.926532
92	0.60928172	6.61282160	4.02907132		92.00000000	0.37326087	2.46830754	1.948001
93	0.61910397	5.80540800	3.59415114		93.00000000	0.36924731	2.14363130	1.969372
94	0.62922394	4.72771360	2.97479058		94.00000000	0.36531915	1.72712431	1.990850
95	0.63934690	3.40486450	2.17688956		95.00000000	0.36147368	1.23076892	2.012238
96	0.64910519	1.78952770	1.16159172		96.00000000	0.35770833	0.64012897	2.033739
97	0.65916562	-0.17769811	-0.11713248		97.00000000	0.35402062	-0.06290879	2.055117
98	0.66893578	-2.45068410	-1.63935028		98.00000000	0.35040816	-0.85873971	2.076510
99	0.67894489	-5.19276000	-3.52559787		99.00000000	0.34686869	-1.80120584	2.098008
100	0.68888772	-8.32362170	-5.73404078		100.00000000	0.34340000	-2.85833169	2.119389
101	0.69365555	-9.99971200	-6.93635573		101.00000000	0.34000000	-3.39990208	2.140744
11:28 02/04/2018
Test Lot:	JK-PERC
Recipe:	Recipe_YJX-LID
Cell Name:	1-0
Test Order:	4
Test Condition:	Light
1	-0.29988128	8.95901780	-2.68664173		1.00000000	34.34000000	307.65267125	0.000000
2	-0.29010266	8.93538190	-2.59217806		2.00000000	17.17000000	153.42050722	0.061828
3	-0.27995932	8.95386790	-2.50671877		3.00000000	11.44666667	102.49194123	0.083242
4	-0.27012339	8.93631460	-2.41390759		4.00000000	8.58500000	76.71826084	0.104734
5	-0.25993690	8.95496750	-2.32772649		5.00000000	6.86800000	61.50271679	0.126111
6	-0.24979579	8.94212910	-2.23370620		6.00000000	5.72333333	51.17878555	0.147453
7	-0.23997103	8.95191860	-2.14820113		7.00000000	4.90571429	43.91555496	0.168824
8	-0.22980089	8.94732570	-2.05610341		8.00000000	4.29250000	38.40639557	0.190299
9	-0.21997538	8.95439340	-1.96974609		9.00000000	3.81555556	34.16598548	0.211733
10	-0.20982237	8.94355390	-1.87655768		10.00000000	3.43400000	30.71216409	0.233117
11	-0.20000951	8.94558330	-1.78920173		11.00000000	3.12181818	27.92648459	0.254490
12	-0.18987139	8.95377060	-1.70006487		12.00000000	2.86166667	25.62270687	0.275986
13	-0.18008459	8.93673040	-1.60936743		13.00000000	2.64153846	23.60671707	0.297368
14	-0.16995911	8.95730590	-1.52237574		14.00000000	2.45285714	21.97099176	0.318718
15	-0.16014104	8.94347380	-1.43221720		15.00000000	2.28933333	20.47459269	0.340094
16	-0.14995380	8.94834230	-1.34183793		16.00000000	2.14625000	19.20537966	0.361581
17	-0.13981791	8.94934840	-1.25127919		17.00000000	2.02000000	18.07768377	0.382960
18	-0.13000950	8.94048210	-1.16234761		18.00000000	1.90777778	17.05645307	0.404317
19	-0.11984831	8.95391460	-1.07311153		19.00000000	1.80736842	16.18302249	0.425701
20	-0.11004364	8.94157310	-0.98396325		20.00000000	1.71700000	15.35268101	0.447180
21	-0.09985788	8.95310500	-0.89403810		21.00000000	1.63523810	14.64045837	0.468571
22	-0.09005618	8.95052810	-0.80605038		22.00000000	1.56090909	13.97096068	0.489953
23	-0.07990764	8.94763950	-0.71498476		23.00000000	1.49304348	13.35921480	0.511300
24	-0.07009924	8.95359420	-0.62764017		24.00000000	1.43083333	12.81110103	0.532758
25	-0.05994922	8.93969250	-0.53592756		25.00000000	1.37360000	12.27956162	0.554134
26	-0.04980067	8.93024350	-0.44473213		26.00000000	1.32076923	11.79479084	0.575506
27	-0.03998707	8.94716740	-0.35777096		27.00000000	1.27185185	11.37947143	0.596939
28	-0.02984597	8.94683550	-0.26702695		28.00000000	1.22642857	10.97265468	0.618407
29	-0.02001301	8.93977930	-0.17891187		29.00000000	1.18413793	10.58593176	0.639836
30	-0.00988679	8.94833560	-0.08847036		30.00000000	1.14466667	10.24286148	0.661242
31	-0.00065374	8.94382480	-0.00584696		31.00000000	1.10774194	9.90744979	0.682704
32	0.00949087	8.94372270	0.08488371		32.00000000	1.07312500	9.59773242	0.704197
33	0.01930420	8.94246480	0.17262710		33.00000000	1.04060606	9.30558307	0.725576
34	0.02945468	8.95202350	0.26367901		34.00000000	1.01000000	9.04154374	0.746937
35	0.03927917	8.93995480	0.35115404		35.00000000	0.98114286	8.77137280	0.768307
36	0.04943562	8.94787310	0.44234362		36.00000000	0.95388889	8.53527673	0.789777
37	0.05925266	8.94394780	0.52995271		37.00000000	0.92810811	8.30095047	0.811158
38	0.06940612	8.94071870	0.62054061		38.00000000	0.90368421	8.07958632	0.832550
39	0.07952907	8.94681840	0.71153214		39.00000000	0.88051282	7.87778830	0.853914
40	0.08939450	8.93786720	0.79899619		40.00000000	0.85850000	7.67315899	0.875393
41	0.09952266	8.94066520	0.88979876		41.00000000	0.83756098	7.48835227	0.896776
42	0.10936204	8.93571570	0.97722810		42.00000000	0.81761905	7.30601136	0.918164
43	0.11950508	8.93936730	1.06829980		43.00000000	0.79860465	7.13902030	0.939653
44	0.12932362	8.94655990	1.15700151		44.00000000	0.78045455	6.98238334	0.961039
45	0.13945772	8.93408490	1.24592711		45.00000000	0.76311111	6.81769945	0.982397
46	0.14928445	8.94782830	1.33577163		46.00000000	0.74652174	6.67974834	1.003774
47	0.15944089	8.94719600	1.42654889		47.00000000	0.73063830	6.53716406	1.025255
48	0.16958393	8.94138340	1.51631494		48.00000000	0.71541667	6.39681471	1.046631
49	0.17939353	8.93927190	1.60364754		49.00000000	0.70081633	6.26478769	1.067983
50	0.18951574	8.94015980	1.69430100		50.00000000	0.68680000	6.14010175	1.089349
51	0.19932683	8.94750120	1.78347705		51.00000000	0.67333333	6.02465081	1.110840
52	0.20947881	8.93510340	1.87171483		52.00000000	0.66038462	5.90060482	1.132226
53	0.21928841	8.95083240	1.96281381		53.00000000	0.64792453	5.79946386	1.153569
54	0.22941211	8.94396110	2.05185299		54.00000000	0.63592593	5.68769674	1.174935
55	0.23924999	8.94216730	2.13941344		55.00000000	0.62436364	5.58316409	1.196429
56	0.24940346	8.95314880	2.23294629		56.00000000	0.61321429	5.49019875	1.217808
57	0.25952864	8.94518280	2.32153113		57.00000000	0.60245614	5.38908030	1.239169
58	0.26935387	8.93799690	2.40748406		58.00000000	0.59206897	5.29191058	1.260545
59	0.27951032	8.94141670	2.49921824		59.00000000	0.58203390	5.20420762	1.282035
60	0.28932586	8.94239430	2.58726592		60.00000000	0.57233333	5.11803034	1.303425
61	0.29948455	8.94185350	2.67794697		61.00000000	0.56295082	5.03382376	1.324767
62	0.30930978	8.93937020	2.76503463		62.00000000	0.55387097	4.95125762	1.346148
63	0.31943423	8.93972590	2.85565446		63.00000000	0.54507937	4.87286012	1.367623
64	0.32926244	8.93533990	2.94207182		64.00000000	0.53656250	4.79436832	1.388998
65	0.33940771	8.94841580	3.03716131		65.00000000	0.52830769	4.72751690	1.410348
66	0.34923965	8.92639830	3.11745222		66.00000000	0.52030303	4.64443209	1.431710
67	0.35937971	8.94239140	3.21371403		67.00000000	0.51253731	4.58330926	1.453195
68	0.36956292	8.94220920	3.30470894		68.00000000	0.50500000	4.51581565	1.474577
69	0.37938371	8.93264200	3.38889886		69.00000000	0.49768116	4.44560763	1.495964
70	0.38952899	8.94071200	3.48266652		70.00000000	0.49057143	4.38605786	1.517311
71	0.39933857	8.93802740	3.56929908		71.00000000	0.48366197	4.32298396	1.538775
72	0.40947419	8.93313410	3.65788785		72.00000000	0.47694444	4.26060868	1.560151
73	0.41930836	8.93396190	3.74608491		73.00000000	0.47041096	4.20263358	1.581530
74	0.42946479	8.93537330	3.83742822		74.00000000	0.46405405	4.14649620	1.603018
75	0.43924984	8.92898850	3.92205677		75.00000000	0.45786667	4.08828620	1.624389
76	0.44944349	8.92625330	4.01184644		76.00000000	0.45184211	4.03325708	1.645739
77	0.45959324	8.92781830	4.10316494		77.00000000	0.44597403	3.98157507	1.667120
78	0.46945271	8.91712950	4.18617061		78.00000000	0.44025641	3.92582342	1.688589
79	0.47957045	8.90628720	4.27119216		79.00000000	0.43468354	3.87141649	1.709987
80	0.48940611	8.90539740	4.35835590		80.00000000	0.42925000	3.82264183	1.731353
81	0.49950299	8.89538480	4.44327130		81.00000000	0.42395062	3.77120388	1.752727
82	0.50933868	8.87176700	4.51873409		82.00000000	0.41878049	3.71532291	1.774205
83	0.51948172	8.83183100	4.58797476		83.00000000	0.41373494	3.65403707	1.795598
84	0.52925259	8.78506850	4.64952026		84.00000000	0.40880952	3.59141967	1.816944
85	0.53941125	8.72425560	4.70596162		85.00000000	0.40400000	3.52459926	1.838309
86	0.54954392	8.62724110	4.74104789		86.00000000	0.39930233	3.44487743	1.859796
87	0.55935127	8.50123980	4.75517928		87.00000000	0.39471264	3.35554684	1.881168
88	0.56947422	8.32496360	4.74085215		88.00000000	0.39022727	3.24862784	1.902513
89	0.57930911	8.07646180	4.67876790		89.00000000	0.38584270	3.11624380	1.923892
90	0.58941197	7.71399070	4.54671846		90.00000000	0.38155556	2.94331601	1.945376
91	0.59921491	7.23249480	4.33381872		91.00000000	0.37736264	2.72927331	1.966770
92	0.60931402	6.59526060	4.01858475		92.00000000	0.37326087	2.46175271	1.988242
93	0.61910427	5.79555850	3.58805501		93.00000000	0.36924731	2.13999440	2.009641
94	0.62924808	4.71084310	2.96428898		94.00000000	0.36531915	1.72096119	2.031129
95	0.63931072	3.38501260	2.16407484		95.00000000	0.36147368	1.22359298	2.052501
96	0.64913893	1.77311680	1.15099914		96.00000000	0.35770833	0.63425866	2.073861
97	0.65915471	-0.19341314	-0.12748918		97.00000000	0.35402062	-0.06847224	2.095237
98	0.66894495	-2.46690770	-1.65022545		98.00000000	0.35040816	-0.86442460	2.116716
99	0.67897707	-5.19284490	-3.52582262		99.00000000	0.34686869	-1.80123529	2.138099
100	0.68891698	-8.31392290	-5.72760266		100.00000000	0.34340000	-2.85500112	2.159486
101	0.69373095	-9.99979880	-6.93716992		101.00000000	0.34000000	-3.39993159	2.180837
11:29 02/04/2018
Test Lot:	JK-PERC
Recipe:	Recipe_YJX-LID
Cell Name:	1-0
Test Order:	5
Test Condition:	Light
1	-0.29988354	8.94849400	-2.68350606		1.00000000	34.34000000	307.29128396	0.000000
2	-0.29011902	8.94202420	-2.59425130		2.00000000	17.17000000	153.53455551	0.061800
3	-0.27994144	8.95948510	-2.50813116		3.00000000	11.44666667	102.55623944	0.083212
4	-0.27016130	8.95247080	-2.41861115		4.00000000	8.58500000	76.85696182	0.104716
5	-0.25998592	8.94906620	-2.32663121		5.00000000	6.86800000	61.46218666	0.126096
6	-0.24982619	8.95559690	-2.23734265		6.00000000	5.72333333	51.25586626	0.147443
7	-0.23997386	8.94893930	-2.14751151		7.00000000	4.90571429	43.90093937	0.168874
8	-0.22985953	8.95324710	-2.05798917		8.00000000	4.29250000	38.43181318	0.190376
9	-0.21999753	8.95588400	-1.97027236		9.00000000	3.81555556	34.17167295	0.211759
10	-0.20984523	8.95245080	-1.87862910		10.00000000	3.43400000	30.74271605	0.233104
11	-0.20003532	8.95081710	-1.79047956		11.00000000	3.12181818	27.94282356	0.254471
12	-0.18986517	8.95161630	-1.69960015		12.00000000	2.86166667	25.61654198	0.275939
13	-0.18011406	8.95134930	-1.61226386		13.00000000	2.64153846	23.64533346	0.297318
14	-0.16994762	8.96438120	-1.52347525		14.00000000	2.45285714	21.98834646	0.318671
15	-0.16013549	8.94719410	-1.43276331		15.00000000	2.28933333	20.48310969	0.340052
16	-0.14999065	8.94886300	-1.34224578		16.00000000	2.14625000	19.20649721	0.361534
17	-0.13982198	8.96249390	-1.25315364		17.00000000	2.02000000	18.10423768	0.382908
18	-0.13002770	8.94331070	-1.16287812		18.00000000	1.90777778	17.06184941	0.404307
19	-0.11989848	8.94978050	-1.07306508		19.00000000	1.80736842	16.17555065	0.425673
20	-0.11005954	8.95241260	-0.98529841		20.00000000	1.71700000	15.37129243	0.447152
21	-0.09989237	8.94941710	-0.89397848		21.00000000	1.63523810	14.63442777	0.468540
22	-0.09008320	8.95206740	-0.80643091		22.00000000	1.56090909	13.97336339	0.489925
23	-0.07992943	8.95401950	-0.71568964		23.00000000	1.49304348	13.36874042	0.511277
24	-0.07014781	8.94177530	-0.62724591		24.00000000	1.43083333	12.79419016	0.532762
25	-0.05997021	8.95523930	-0.53704756		25.00000000	1.37360000	12.30091670	0.554133
26	-0.04984918	8.95083050	-0.44619158		26.00000000	1.32076923	11.82198151	0.575518
27	-0.04001546	8.94882110	-0.35809115		27.00000000	1.27185185	11.38157469	0.596989
28	-0.02986317	8.95766740	-0.26750431		28.00000000	1.22642857	10.98593923	0.618445
29	-0.02003465	8.95471860	-0.17940464		29.00000000	1.18413793	10.60362196	0.639833
30	-0.00990766	8.94587710	-0.08863275		30.00000000	1.14466667	10.24004732	0.661220
31	-0.00066864	8.95837880	-0.00598989		31.00000000	1.10774194	9.92357187	0.682691
32	0.00946707	8.95981220	0.08482318		32.00000000	1.07312500	9.61499847	0.704184
33	0.01927447	8.94617460	0.17243276		33.00000000	1.04060606	9.30944351	0.725560
34	0.02941679	8.96510220	0.26372455		34.00000000	1.01000000	9.05475322	0.746938
35	0.03926438	8.94566730	0.35124609		35.00000000	0.98114286	8.77697757	0.768301
36	0.04940522	8.95816520	0.44258010		36.00000000	0.95388889	8.54509425	0.789769
37	0.05920145	8.94799140	0.52973406		37.00000000	0.92810811	8.30470337	0.811159
38	0.06936536	8.95457550	0.62113735		38.00000000	0.90368421	8.09210849	0.832537
39	0.07951438	8.95679470	0.71219395		39.00000000	0.88051282	7.88657256	0.853886
40	0.08932475	8.95802310	0.80017317		40.00000000	0.85850000	7.69046283	0.875353
41	0.09949461	8.96090700	0.89156198		41.00000000	0.83756098	7.50530601	0.896727
42	0.10930573	8.95773410	0.97913166		42.00000000	0.81761905	7.32401402	0.918119
43	0.11944508	8.94353390	1.06826112		43.00000000	0.79860465	7.14234777	0.939603
44	0.12928300	8.95950510	1.15831170		44.00000000	0.78045455	6.99248648	0.960978
45	0.13943425	8.94344430	1.24702245		45.00000000	0.76311111	6.82484172	0.982319
46	0.14923346	8.95577530	1.33650134		46.00000000	0.74652174	6.68568095	1.003704
47	0.15940481	8.94382950	1.42568944		47.00000000	0.73063830	6.53470436	1.025183
48	0.16954713	8.95776460	1.51876328		48.00000000	0.71541667	6.40853409	1.046555
49	0.17939174	8.95395280	1.60626517		49.00000000	0.70081633	6.27507631	1.067917
50	0.18951173	8.95781800	1.69761159		50.00000000	0.68680000	6.15222940	1.089288
51	0.19930500	8.94348050	1.78248038		51.00000000	0.67333333	6.02194354	1.110769
52	0.20944807	8.95715900	1.87605967		52.00000000	0.66038462	5.91517000	1.132144
53	0.21927184	8.94866280	1.96218976		53.00000000	0.64792453	5.79805812	1.153489
54	0.22941118	8.96113590	2.05578476		54.00000000	0.63592593	5.69861864	1.174869
55	0.23924462	8.93907830	2.13862639		55.00000000	0.62436364	5.58123543	1.196353
56	0.24938844	8.96118930	2.23481702		56.00000000	0.61321429	5.49512930	1.217723
57	0.25950471	8.94264320	2.32065803		57.00000000	0.60245614	5.38755031	1.239081
58	0.26935083	8.95220570	2.41128404		58.00000000	0.59206897	5.30032317	1.260458
59	0.27946484	8.94516940	2.49986034		59.00000000	0.58203390	5.20639182	1.281941
60	0.28931320	8.95352550	2.59037311		60.00000000	0.57233333	5.12440109	1.303348
61	0.29944584	8.95177840	2.68057280		61.00000000	0.56295082	5.03941099	1.324698
62	0.30927557	8.96232510	2.77182820		62.00000000	0.55387097	4.96397168	1.346065
63	0.31943202	8.95207410	2.85957911		63.00000000	0.54507937	4.87959087	1.367547
64	0.32924241	8.95321370	2.94777766		64.00000000	0.53656250	4.80395873	1.388929
65	0.33939812	8.95246220	3.03844884		65.00000000	0.52830769	4.72965465	1.410331
66	0.34920403	8.94410130	3.12331622		66.00000000	0.52030303	4.65364301	1.431700
67	0.35936943	8.95932290	3.21970676		67.00000000	0.51253731	4.59198729	1.453181
68	0.36952290	8.95245740	3.30813802		68.00000000	0.50500000	4.52099099	1.474556
69	0.37933180	8.94765280	3.39412924		69.00000000	0.49768116	4.45307822	1.495941
70	0.38947189	8.94850250	3.48519018		70.00000000	0.49057143	4.38987966	1.517290
71	0.39931425	8.94850250	3.57326456		71.00000000	0.48366197	4.32805036	1.538770
72	0.40945140	8.94011780	3.66054375		72.00000000	0.47694444	4.26393952	1.560168
73	0.41926920	8.94616600	3.75085186		73.00000000	0.47041096	4.20837453	1.581548
74	0.42943236	8.93055250	3.83506824		74.00000000	0.46405405	4.14425909	1.603043
75	0.43922114	8.94792460	3.93011764		75.00000000	0.45786667	4.09695641	1.624427
76	0.44943494	8.93545060	4.01590370		76.00000000	0.45184211	4.03741281	1.645774
77	0.45955640	8.92192080	4.10012580		77.00000000	0.44597403	3.97894494	1.667158
78	0.46939284	8.93830200	4.19557496		78.00000000	0.44025641	3.93514475	1.688633
79	0.47953218	8.92149070	4.27814188		79.00000000	0.43468354	3.87802520	1.710016
80	0.48934257	8.91716100	4.36354648		80.00000000	0.42925000	3.82769136	1.731371
81	0.49950126	8.89395620	4.44254233		81.00000000	0.42395062	3.77059822	1.752745
82	0.50931758	8.87961390	4.52254346		82.00000000	0.41878049	3.71860904	1.774225
83	0.51947629	8.84061150	4.59248806		83.00000000	0.41373494	3.65766987	1.795602
84	0.52924049	8.80346110	4.65914807		84.00000000	0.40880952	3.59893874	1.816956
85	0.53935677	8.73154160	4.70941607		85.00000000	0.40400000	3.52754281	1.838385
86	0.54951698	8.65553570	4.75636384		86.00000000	0.39930233	3.45617553	1.859876
87	0.55935341	8.51247690	4.76148298		87.00000000	0.39471264	3.35998226	1.881247
88	0.56948453	8.32819750	4.74277964		88.00000000	0.39022727	3.24988980	1.902609
89	0.57931280	8.08718010	4.68500695		89.00000000	0.38584270	3.12037938	1.923994
90	0.58937550	7.72246030	4.55142890		90.00000000	0.38155556	2.94654763	1.945480
91	0.59920520	7.26852940	4.35534061		91.00000000	0.37736264	2.74287142	1.966873
92	0.60930884	6.62478690	4.03654122		92.00000000	0.37326087	2.47277372	1.988347
93	0.61908048	5.81640820	3.60082478		93.00000000	0.36924731	2.14769309	2.009754
94	0.62920868	4.74617820	2.98633652		94.00000000	0.36531915	1.73386978	2.031274
95	0.63931084	3.40596250	2.17746875		95.00000000	0.36147368	1.23116581	2.052651
96	0.64911968	1.80367490	1.17080087		96.00000000	0.35770833	0.64518954	2.074077
97	0.65916228	-0.17444499	-0.11498756		97.00000000	0.35402062	-0.06175712	2.095448
98	0.66890270	-2.44581440	-1.63601186		98.00000000	0.35040816	-0.85703333	2.116940
99	0.67895573	-5.20882370	-3.53656070		99.00000000	0.34686869	-1.80677784	2.138332
100	0.68888664	-8.34327320	-5.74756944		100.00000000	0.34340000	-2.86508002	2.159759
101	0.69355404	-10.00015000	-6.93564443		101.00000000	0.34000000	-3.40005100	2.181149
