# Supplementary material for: Study on the Electrical Injection Regeneration of Industrialized B-Doped Czochralski Silicon PERC Solar Cells
Source: Hindawi journal article supplement (doi:10.1155/2019/5357370), 2019-06-20
Supplement: f1 [file 5357370.f1.zip › section3.2/IVRawData_1-2-1.5h.csv]

15:06 02/04/2018
Test Lot:	JK-PERC
Recipe:	Recipe_YJX-LID
Cell Name:	1-2-1.5h
Test Order:	2
Test Condition:	Light
1	-0.29990175	8.80079840	-2.63937484		1.00000000	34.34000000	302.21941706	0.000000
2	-0.29012850	8.81080630	-2.55626602		2.00000000	17.17000000	151.28154417	0.061784
3	-0.27997342	8.80189510	-2.46429667		3.00000000	11.44666667	100.75235924	0.083207
4	-0.27018455	8.79257390	-2.37561762		4.00000000	8.58500000	75.48424693	0.104703
5	-0.25996321	8.81066320	-2.29044829		5.00000000	6.86800000	60.51163486	0.126090
6	-0.24983047	8.79095550	-2.19624854		6.00000000	5.72333333	50.31356865	0.147503
7	-0.24005051	8.81541730	-2.11614542		7.00000000	4.90571429	43.24591858	0.168902
8	-0.22989841	8.80169110	-2.02349479		8.00000000	4.29250000	37.78125905	0.190397
9	-0.22006561	8.78855040	-1.93405770		9.00000000	3.81555556	33.53320230	0.211778
10	-0.20992616	8.80819320	-1.84907018		10.00000000	3.43400000	30.24733545	0.233142
11	-0.20008518	8.78927330	-1.75860333		11.00000000	3.12181818	27.43851319	0.254515
12	-0.18994424	8.80139730	-1.67177472		12.00000000	2.86166667	25.18666527	0.275999
13	-0.18015163	8.78932670	-1.58341153		13.00000000	2.64153846	23.21734453	0.297383
14	-0.17002335	8.79523750	-1.49539574		14.00000000	2.45285714	21.57346113	0.318728
15	-0.16019128	8.79080390	-1.40821013		15.00000000	2.28933333	20.12508040	0.340141
16	-0.15004142	8.79249570	-1.31923854		16.00000000	2.14625000	18.87089390	0.361648
17	-0.13990644	8.79597380	-1.23061338		17.00000000	2.02000000	17.76786708	0.383038
18	-0.13007885	8.78883460	-1.14324150		18.00000000	1.90777778	16.76714334	0.404423
19	-0.11992674	8.79592230	-1.05486629		19.00000000	1.80736842	15.89747220	0.425791
20	-0.11011627	8.79175190	-0.96811493		20.00000000	1.71700000	15.09543801	0.447268
21	-0.09994035	8.80016230	-0.87949132		21.00000000	1.63523810	14.39036064	0.468654
22	-0.09013286	8.79515740	-0.79273265		22.00000000	1.56090909	13.72844114	0.490037
23	-0.07999267	8.78782940	-0.70296191		23.00000000	1.49304348	13.12061137	0.511375
24	-0.07015093	8.79976560	-0.61731178		24.00000000	1.43083333	12.59099795	0.532851
25	-0.06001148	8.78687480	-0.52731340		25.00000000	1.37360000	12.06965123	0.554226
26	-0.04985343	8.81375690	-0.43939600		26.00000000	1.32076923	11.64093892	0.575616
27	-0.04005189	8.78870770	-0.35200435		27.00000000	1.27185185	11.17793416	0.597110
28	-0.02988937	8.80037590	-0.26303767		28.00000000	1.22642857	10.79303244	0.618503
29	-0.02008559	8.79012110	-0.17655479		29.00000000	1.18413793	10.40871581	0.639854
30	-0.00994168	8.79020120	-0.08738935		30.00000000	1.14466667	10.06185031	0.661238
31	-0.00066784	8.79649260	-0.00587464		31.00000000	1.10774194	9.74424374	0.682836
32	0.00948554	8.78897480	0.08336820		32.00000000	1.07312500	9.43166858	0.704213
33	0.01929946	8.79606530	0.16975930		33.00000000	1.04060606	9.15323886	0.725560
34	0.02944234	8.79095080	0.25882614		34.00000000	1.01000000	8.87886031	0.746941
35	0.03927337	8.79419610	0.34537772		35.00000000	0.98114286	8.62836269	0.768423
36	0.04941476	8.79858400	0.43477993		36.00000000	0.95388889	8.39287152	0.789812
37	0.05924580	8.78369620	0.52039706		37.00000000	0.92810811	8.15221966	0.811156
38	0.06937156	8.79829690	0.61035157		38.00000000	0.90368421	7.95088199	0.832532
39	0.07950923	8.80047800	0.69971921		39.00000000	0.88051282	7.74893371	0.854026
40	0.08931793	8.79345040	0.78541281		40.00000000	0.85850000	7.54917717	0.875402
41	0.09947644	8.80212690	0.87560427		41.00000000	0.83756098	7.37231799	0.896769
42	0.10930078	8.78533460	0.96024392		42.00000000	0.81761905	7.18305691	0.918143
43	0.11944962	8.81644250	1.05312071		43.00000000	0.79860465	7.04085199	0.939618
44	0.12926205	8.78419300	1.13546279		44.00000000	0.78045455	6.85566336	0.961006
45	0.13942352	8.79761410	1.22659433		45.00000000	0.76311111	6.71355707	0.982351
46	0.14925307	8.79173470	1.31219339		46.00000000	0.74652174	6.56322108	1.003728
47	0.15937065	8.79444500	1.40157642		47.00000000	0.73063830	6.42555833	1.025214
48	0.16952394	8.79275420	1.49058234		48.00000000	0.71541667	6.29048290	1.046589
49	0.17936391	8.79690650	1.57784755		49.00000000	0.70081633	6.16501570	1.067969
50	0.18950158	8.79141140	1.66598635		50.00000000	0.68680000	6.03794135	1.089339
51	0.19926116	8.79239080	1.75198199		51.00000000	0.67333333	5.92020981	1.110802
52	0.20943232	8.79344370	1.84163131		52.00000000	0.66038462	5.80705494	1.132186
53	0.21923582	8.79472730	1.92811925		53.00000000	0.64792453	5.69831954	1.153569
54	0.22939433	8.78555200	2.01535581		54.00000000	0.63592593	5.58696029	1.174909
55	0.23924248	8.79203700	2.10342874		55.00000000	0.62436364	5.48942819	1.196381
56	0.24937196	8.80113220	2.19475559		56.00000000	0.61321429	5.39698000	1.217757
57	0.25951856	8.79562190	2.28262713		57.00000000	0.60245614	5.29897642	1.239136
58	0.26935706	8.79138280	2.36802102		58.00000000	0.59206897	5.20510492	1.260619
59	0.27950662	8.79914950	2.45942054		59.00000000	0.58203390	5.12140329	1.282000
60	0.28931680	8.78975870	2.54302486		60.00000000	0.57233333	5.03067190	1.303353
61	0.29943290	8.80385590	2.63616410		61.00000000	0.56295082	4.95613790	1.324730
62	0.30928999	8.78126910	2.71595863		62.00000000	0.55387097	4.86369001	1.346215
63	0.31943360	8.79440980	2.80922998		63.00000000	0.54507937	4.79365131	1.367601
64	0.32925496	8.79277610	2.89506514		64.00000000	0.53656250	4.71787393	1.388962
65	0.33941495	8.77592560	2.97868035		65.00000000	0.52830769	4.63638900	1.410329
66	0.34921399	8.80409620	3.07451356		66.00000000	0.52030303	4.58079793	1.431812
67	0.35938591	8.77825360	3.15478066		67.00000000	0.51253731	4.49918252	1.453198
68	0.36953995	8.79831500	3.25132889		68.00000000	0.50500000	4.44314908	1.474537
69	0.37933153	8.77686880	3.32934307		69.00000000	0.49768116	4.36808224	1.495922
70	0.38948035	8.78793330	3.42272734		70.00000000	0.49057143	4.31110899	1.517403
71	0.39931214	8.77292540	3.50313562		71.00000000	0.48366197	4.24313040	1.538777
72	0.40946096	8.78910450	3.59879517		72.00000000	0.47694444	4.19191456	1.560139
73	0.41928455	8.78599070	3.68383016		73.00000000	0.47041096	4.13302631	1.581517
74	0.42942670	8.77903840	3.76995349		74.00000000	0.46405405	4.07394836	1.602985
75	0.43925849	8.77036480	3.85245720		75.00000000	0.45786667	4.01565770	1.624375
76	0.44941252	8.77547360	3.94380770		76.00000000	0.45184211	3.96512847	1.645719
77	0.45953456	8.74729160	4.01968280		77.00000000	0.44597403	3.90106485	1.667096
78	0.46940282	8.75454620	4.10940867		78.00000000	0.44025641	3.85424508	1.688587
79	0.47953230	8.73104190	4.18681660		79.00000000	0.43468354	3.79524024	1.709964
80	0.48935962	8.71422770	4.26439116		80.00000000	0.42925000	3.74058224	1.731340
81	0.49948835	8.68521980	4.33816611		81.00000000	0.42395062	3.68210430	1.752708
82	0.50931567	8.64528270	4.40317795		82.00000000	0.41878049	3.62047571	1.774183
83	0.51940495	8.60503770	4.46949918		83.00000000	0.41373494	3.56020475	1.795573
84	0.52922630	8.51709080	4.50746845		84.00000000	0.40880952	3.48186783	1.816962
85	0.53935432	8.40876870	4.53530572		85.00000000	0.40400000	3.39714255	1.838306
86	0.54950684	8.25354480	4.53537932		86.00000000	0.39930233	3.29565963	1.859778
87	0.55930889	8.05428790	4.50483483		87.00000000	0.39471264	3.17912927	1.881163
88	0.56942195	7.75711920	4.41707394		88.00000000	0.39022727	3.02703947	1.902547
89	0.57924408	7.34536890	4.25476145		89.00000000	0.38584270	2.83415694	1.924031
90	0.58938396	6.81740710	4.01807039		90.00000000	0.38155556	2.60121955	1.945476
91	0.59915400	6.13541030	3.67605562		91.00000000	0.37736264	2.31527461	1.966856
92	0.60925442	5.23977380	3.19235535		92.00000000	0.37326087	1.95580252	1.988328
93	0.61905348	4.17178920	2.58256062		93.00000000	0.36924731	1.54042195	2.009694
94	0.62916136	2.83116170	1.78125755		94.00000000	0.36531915	1.03427758	2.031194
95	0.63931394	1.23491510	0.78949844		95.00000000	0.36147368	0.44638931	2.052570
96	0.64900577	-0.53886938	-0.34972934		96.00000000	0.35770833	-0.19275807	2.073961
97	0.65913600	-2.65087750	-1.74728879		97.00000000	0.35402062	-0.93846529	2.095329
98	0.66888517	-4.98733330	-3.33595328		98.00000000	0.35040816	-1.74760230	2.116809
99	0.67910397	-7.71829840	-5.24152709		99.00000000	0.34686869	-2.67723603	2.138232
100	0.68671858	-9.99419880	-6.86320201		100.00000000	0.34340000	-3.43200787	2.159632
101	0.68666124	-10.00005400	-6.86664948		101.00000000	0.34000000	-3.40001836	2.180993
15:06 02/04/2018
Test Lot:	JK-PERC
Recipe:	Recipe_YJX-LID
Cell Name:	1-2-1.5h
Test Order:	3
Test Condition:	Light
1	-0.29989967	8.78560350	-2.63479959		1.00000000	34.34000000	301.69762419	0.000000
2	-0.29012138	8.80336000	-2.55404295		2.00000000	17.17000000	151.15369120	0.061716
3	-0.27998510	8.79437350	-2.46229354		3.00000000	11.44666667	100.66626200	0.083249
4	-0.27016887	8.79044150	-2.37490365		4.00000000	8.58500000	75.46594028	0.104631
5	-0.26001769	8.79637620	-2.28721342		5.00000000	6.86800000	60.41351174	0.125983
6	-0.24984570	8.78806970	-2.19566143		6.00000000	5.72333333	50.29705225	0.147425
7	-0.24002500	8.79069710	-2.10998707		7.00000000	4.90571429	43.12464834	0.168921
8	-0.22985448	8.79293160	-2.02109472		8.00000000	4.29250000	37.74365889	0.190362
9	-0.22003676	8.79772090	-1.93582200		9.00000000	3.81555556	33.56819286	0.211721
10	-0.20991313	8.79507060	-1.84620080		10.00000000	3.43400000	30.20227244	0.233080
11	-0.20011179	8.79158780	-1.75930037		11.00000000	3.12181818	27.44573864	0.254564
12	-0.18994872	8.79907990	-1.67137396		12.00000000	2.86166667	25.18003365	0.275942
13	-0.18017788	8.79112910	-1.58396700		13.00000000	2.64153846	23.22210564	0.297295
14	-0.17002299	8.78824520	-1.49420373		14.00000000	2.45285714	21.55631001	0.318669
15	-0.16016880	8.79213050	-1.40822499		15.00000000	2.28933333	20.12811742	0.340145
16	-0.15004815	8.78341580	-1.31793529		16.00000000	2.14625000	18.85140616	0.361517
17	-0.13989104	8.78914640	-1.22952283		17.00000000	2.02000000	17.75407573	0.382895
18	-0.13004801	8.79783820	-1.14414135		18.00000000	1.90777778	16.78432021	0.404263
19	-0.11989982	8.78761290	-1.05363320		19.00000000	1.80736842	15.88245405	0.425738
20	-0.11009103	8.78342720	-0.96697655		20.00000000	1.71700000	15.08114450	0.447123
21	-0.09993020	8.79915330	-0.87930112		21.00000000	1.63523810	14.38871068	0.468501
22	-0.09010949	8.78666110	-0.79176155		22.00000000	1.56090909	13.71517919	0.489855
23	-0.07995982	8.79364870	-0.70313854		23.00000000	1.49304348	13.12929984	0.511344
24	-0.07012647	8.79213050	-0.61656104		24.00000000	1.43083333	12.58007339	0.532711
25	-0.05998349	8.80009940	-0.52786066		25.00000000	1.37360000	12.08781654	0.554096
26	-0.04983531	8.78914640	-0.43800980		26.00000000	1.32076923	11.60843413	0.575572
27	-0.04001535	8.79257110	-0.35183778		27.00000000	1.27185185	11.18284784	0.596948
28	-0.02987014	8.79009910	-0.26256148		28.00000000	1.22642857	10.78042868	0.618314
29	-0.02003530	8.79109760	-0.17613225		29.00000000	1.18413793	10.40987212	0.639690
30	-0.00990125	8.79294110	-0.08706114		30.00000000	1.14466667	10.06498658	0.661167
31	-0.00064843	8.78835010	-0.00569865		31.00000000	1.10774194	9.73522395	0.682675
32	0.00951517	8.79926970	0.08372658		32.00000000	1.07312500	9.44271630	0.704030
33	0.01929094	8.78701880	0.16950986		33.00000000	1.04060606	9.14382502	0.725399
34	0.02945893	8.79357050	0.25904919		34.00000000	1.01000000	8.88150621	0.746887
35	0.03926670	8.78693490	0.34503395		35.00000000	0.98114286	8.62123841	0.768262
36	0.04941832	8.77354910	0.43357405		36.00000000	0.95388889	8.36899100	0.789605
37	0.05920748	8.80597210	0.52137942		37.00000000	0.92810811	8.17289411	0.810992
38	0.06938664	8.79055020	0.60994673		38.00000000	0.90368421	7.94388142	0.832474
39	0.07952783	8.78886410	0.69895932		39.00000000	0.88051282	7.73870752	0.853861
40	0.08934379	8.79598520	0.78586662		40.00000000	0.85850000	7.55135329	0.875224
41	0.09945522	8.78104590	0.87332081		41.00000000	0.83756098	7.35466137	0.896600
42	0.10930689	8.80563160	0.96251620		42.00000000	0.81761905	7.19965212	0.918072
43	0.11943544	8.79347040	1.05025201		43.00000000	0.79860465	7.02250636	0.939452
44	0.12928563	8.79012110	1.13643634		44.00000000	0.78045455	6.86028997	0.960792
45	0.13942534	8.79468730	1.22620227		45.00000000	0.76311111	6.71132360	0.982167
46	0.14925246	8.78951840	1.31185724		46.00000000	0.74652174	6.56156656	1.003643
47	0.15939440	8.79605200	1.40204143		47.00000000	0.73063830	6.42673246	1.025014
48	0.16955122	8.79606530	1.49138360		48.00000000	0.71541667	6.29285172	1.046379
49	0.17938058	8.79087070	1.57691148		49.00000000	0.70081633	6.16078571	1.067736
50	0.18952624	8.79020980	1.66597541		50.00000000	0.68680000	6.03711609	1.089218
51	0.19932434	8.78349210	1.75076377		51.00000000	0.67333333	5.91421801	1.110595
52	0.20943429	8.78988270	1.84090284		52.00000000	0.66038462	5.80470331	1.131980
53	0.21925545	8.78771780	1.92675502		53.00000000	0.64792453	5.69377791	1.153338
54	0.22944428	8.78654770	2.01602311		54.00000000	0.63592593	5.58759348	1.174818
55	0.23922525	8.78798290	2.10230741		55.00000000	0.62436364	5.48689696	1.196196
56	0.24940515	8.78365420	2.19068859		56.00000000	0.61321429	5.38626224	1.217571
57	0.25953594	8.78502750	2.28003037		57.00000000	0.60245614	5.29259376	1.239073
58	0.26935932	8.78874110	2.36732933		58.00000000	0.59206897	5.20354085	1.260452
59	0.27951542	8.79079060	2.45716153		59.00000000	0.58203390	5.11653812	1.281814
60	0.28934550	8.79117580	2.54368716		60.00000000	0.57233333	5.03148295	1.303194
61	0.29945469	8.78136630	2.62962132		61.00000000	0.56295082	4.94347736	1.324674
62	0.30928034	8.78816030	2.71800521		62.00000000	0.55387097	4.86750685	1.346055
63	0.31945950	8.79854390	2.81077844		63.00000000	0.54507937	4.79590472	1.367411
64	0.32927543	8.77094080	2.88805530		64.00000000	0.53656250	4.70615792	1.388782
65	0.33943227	8.79146480	2.98410685		65.00000000	0.52830769	4.64459848	1.410268
66	0.34919241	8.77329540	3.06356816		66.00000000	0.52030303	4.56477218	1.431653
67	0.35936561	8.78798290	3.15809884		67.00000000	0.51253731	4.50416915	1.453012
68	0.36954179	8.77824880	3.24392977		68.00000000	0.50500000	4.43301564	1.474383
69	0.37933764	8.77683830	3.32938513		69.00000000	0.49768116	4.36806706	1.495869
70	0.38948852	8.77200030	3.41659341		70.00000000	0.49057143	4.30329272	1.517255
71	0.39928216	8.79020600	3.50977244		71.00000000	0.48366197	4.25148837	1.538608
72	0.40947917	8.77605720	3.59361262		72.00000000	0.47694444	4.18569173	1.559985
73	0.41929215	8.77833840	3.68068838		73.00000000	0.47041096	4.12942658	1.581464
74	0.42941028	8.76781650	3.76499054		74.00000000	0.46405405	4.06874079	1.602839
75	0.43925229	8.77108760	3.85272031		75.00000000	0.45786667	4.01598864	1.624183
76	0.44941878	8.76236060	3.93796941		76.00000000	0.45184211	3.95920346	1.645574
77	0.45954433	8.76096920	4.02605372		77.00000000	0.44597403	3.90716471	1.667060
78	0.46940124	8.73979280	4.10246958		78.00000000	0.44025641	3.84774980	1.688444
79	0.47953796	8.73296830	4.18778980		79.00000000	0.43468354	3.79607761	1.709816
80	0.48933902	8.71381000	4.26400725		80.00000000	0.42925000	3.74040294	1.731175
81	0.49949139	8.68034550	4.33575784		81.00000000	0.42395062	3.68003783	1.752697
82	0.50931704	8.65271380	4.40697458		82.00000000	0.41878049	3.62358771	1.774070
83	0.51946121	8.59420780	4.46435758		83.00000000	0.41373494	3.55572405	1.795449
84	0.52921909	8.52087020	4.50940717		84.00000000	0.40880952	3.48341289	1.816807
85	0.53933054	8.40073780	4.53077445		85.00000000	0.40400000	3.39389807	1.838286
86	0.54951191	8.24833870	4.53256035		86.00000000	0.39930233	3.29358083	1.859648
87	0.55931967	8.05005360	4.50255332		87.00000000	0.39471264	3.17745794	1.881042
88	0.56943482	7.74882220	4.41244917		88.00000000	0.39022727	3.02380175	1.902526
89	0.57924557	7.35006620	4.25749329		89.00000000	0.38584270	2.83596936	1.923904
90	0.58936447	6.81280330	4.01522421		90.00000000	0.38155556	2.59946295	1.945262
91	0.59915364	6.13363840	3.67499177		91.00000000	0.37736264	2.31460596	1.966629
92	0.60928291	5.25490620	3.20172454		92.00000000	0.37326087	1.96145086	1.988164
93	0.61905646	4.16632560	2.57919078		93.00000000	0.36924731	1.53840453	2.009565
94	0.62916565	2.84190060	1.78802624		94.00000000	0.36531915	1.03820071	2.030905
95	0.63932472	1.23661730	0.79060001		95.00000000	0.36147368	0.44700461	2.052279
96	0.64902085	-0.54856390	-0.35602941		96.00000000	0.35770833	-0.19622588	2.073760
97	0.65912259	-2.65558000	-1.75035277		97.00000000	0.35402062	-0.94013007	2.095137
98	0.66885221	-4.98397110	-3.33354008		98.00000000	0.35040816	-1.74642416	2.116508
99	0.67910951	-7.73384330	-5.25212653		99.00000000	0.34686869	-2.68262807	2.137929
100	0.68666965	-9.99430850	-6.86278832		100.00000000	0.34340000	-3.43204554	2.159423
101	0.68664211	-10.00006500	-6.86646573		101.00000000	0.34000000	-3.40002210	2.180812
15:06 02/04/2018
Test Lot:	JK-PERC
Recipe:	Recipe_YJX-LID
Cell Name:	1-2-1.5h
Test Order:	4
Test Condition:	Light
1	-0.29994962	8.78925230	-2.63633289		1.00000000	34.34000000	301.82292398	0.000000
2	-0.29007456	8.80034920	-2.55275742		2.00000000	17.17000000	151.10199576	0.061856
3	-0.27995610	8.78615380	-2.45973735		3.00000000	11.44666667	100.57217383	0.083326
4	-0.27014729	8.79339980	-2.37551313		4.00000000	8.58500000	75.49133728	0.104832
5	-0.25996634	8.79537580	-2.28650166		5.00000000	6.86800000	60.40664099	0.126219
6	-0.24982110	8.79455660	-2.19706580		6.00000000	5.72333333	50.33417894	0.147570
7	-0.24001153	8.79836940	-2.11171010		7.00000000	4.90571429	43.16228646	0.168947
8	-0.22985663	8.78080650	-2.01832659		8.00000000	4.29250000	37.69161190	0.190430
9	-0.22002175	8.80084130	-1.93637650		9.00000000	3.81555556	33.58009892	0.211812
10	-0.20986238	8.79347520	-1.84541963		10.00000000	3.43400000	30.19679384	0.233160
11	-0.20006770	8.78963280	-1.75852162		11.00000000	3.12181818	27.43963549	0.254542
12	-0.18993883	8.78831100	-1.66924151		12.00000000	2.86166667	25.14921665	0.276025
13	-0.18015011	8.78794570	-1.58314938		13.00000000	2.64153846	23.21369656	0.297401
14	-0.16995724	8.78679750	-1.49337985		14.00000000	2.45285714	21.55275901	0.318761
15	-0.16018340	8.80142020	-1.40984141		15.00000000	2.28933333	20.14938464	0.340131
16	-0.15005305	8.78704830	-1.31852340		16.00000000	2.14625000	18.85920241	0.361595
17	-0.13983190	8.79279230	-1.22951285		17.00000000	2.02000000	17.76144045	0.382985
18	-0.13006923	8.78177450	-1.14223865		18.00000000	1.90777778	16.75367424	0.404335
19	-0.11991952	8.79959300	-1.05524297		19.00000000	1.80736842	15.90410651	0.425699
20	-0.11009060	8.79135890	-0.96784598		20.00000000	1.71700000	15.09476323	0.447172
21	-0.09993197	8.79527570	-0.87892923		21.00000000	1.63523810	14.38236988	0.468548
22	-0.09009188	8.78075310	-0.79107459		22.00000000	1.56090909	13.70595734	0.489938
23	-0.07994442	8.79344180	-0.70298658		23.00000000	1.49304348	13.12899093	0.511276
24	-0.07014378	8.78864190	-0.61646858		24.00000000	1.43083333	12.57508179	0.532740
25	-0.06000227	8.78520580	-0.52713230		25.00000000	1.37360000	12.06735869	0.554125
26	-0.04982652	8.79260060	-0.43810470		26.00000000	1.32076923	11.61299633	0.575510
27	-0.04002291	8.78708170	-0.35168454		27.00000000	1.27185185	11.17586613	0.596987
28	-0.02989405	8.78821280	-0.26271524		28.00000000	1.22642857	10.77811527	0.618374
29	-0.02007927	8.78818800	-0.17646040		29.00000000	1.18413793	10.40642676	0.639727
30	-0.00993106	8.77651600	-0.08716009		30.00000000	1.14466667	10.04618531	0.661095
31	-0.00069310	8.79652400	-0.00609684		31.00000000	1.10774194	9.74427852	0.682705
32	0.00948468	8.79866310	0.08345250		32.00000000	1.07312500	9.44206534	0.704082
33	0.01930290	8.78524590	0.16958070		33.00000000	1.04060606	9.14198013	0.725437
34	0.02943593	8.78505040	0.25859616		34.00000000	1.01000000	8.87290090	0.746806
35	0.03927574	8.79418950	0.34539827		35.00000000	0.98114286	8.62835621	0.768282
36	0.04940505	8.78930570	0.43423611		36.00000000	0.95388889	8.38402105	0.789712
37	0.05922923	8.79110530	0.52069035		37.00000000	0.92810811	8.15909611	0.811080
38	0.06936970	8.79885860	0.61037422		38.00000000	0.90368421	7.95138959	0.832462
39	0.07952061	8.79255200	0.69918906		39.00000000	0.88051282	7.74195476	0.853951
40	0.08936041	8.78618050	0.78513667		40.00000000	0.85850000	7.54293596	0.875334
41	0.09950982	8.79422280	0.87511153		41.00000000	0.83756098	7.36569783	0.896678
42	0.10931613	8.78204440	0.96001911		42.00000000	0.81761905	7.18036678	0.918054
43	0.11948563	8.80063920	1.05154992		43.00000000	0.79860465	7.02823140	0.939533
44	0.12929046	8.78505040	1.13582321		44.00000000	0.78045455	6.85633252	0.960911
45	0.13942423	8.78737830	1.22517345		45.00000000	0.76311111	6.70574602	0.982267
46	0.14926627	8.79047110	1.31212083		46.00000000	0.74652174	6.56227777	1.003651
47	0.15942536	8.79762360	1.40256431		47.00000000	0.73063830	6.42788073	1.025127
48	0.16956435	8.79392050	1.49113541		48.00000000	0.71541667	6.29131729	1.046514
49	0.17939299	8.79245380	1.57730458		49.00000000	0.70081633	6.16189517	1.067881
50	0.18951933	8.79145530	1.66615072		50.00000000	0.68680000	6.03797150	1.089256
51	0.19927429	8.79432960	1.75248379		51.00000000	0.67333333	5.92151526	1.110740
52	0.20946313	8.78724000	1.84060279		52.00000000	0.66038462	5.80295811	1.132098
53	0.21927167	8.79463290	1.92841384		53.00000000	0.64792453	5.69825837	1.153483
54	0.22942109	8.79136370	2.01692424		54.00000000	0.63592593	5.59065610	1.174836
55	0.23924527	8.78923890	2.10278383		55.00000000	0.62436364	5.48768116	1.196304
56	0.24939467	8.78701500	2.19143471		56.00000000	0.61321429	5.38832313	1.217687
57	0.25955003	8.78372190	2.27981528		57.00000000	0.60245614	5.29180719	1.239063
58	0.26934668	8.79793550	2.36969472		58.00000000	0.59206897	5.20898457	1.260538
59	0.27948791	8.78949260	2.45655692		59.00000000	0.58203390	5.11578264	1.281930
60	0.28931803	8.79873850	2.54563369		60.00000000	0.57233333	5.03581133	1.303290
61	0.29946670	8.78591820	2.63108993		61.00000000	0.56295082	4.94603985	1.324665
62	0.30928046	8.78961470	2.71845608		62.00000000	0.55387097	4.86831240	1.346147
63	0.31945220	8.77937130	2.80458948		63.00000000	0.54507937	4.78545413	1.367522
64	0.32924733	8.78404430	2.89212313		64.00000000	0.53656250	4.71318877	1.388881
65	0.33941236	8.78620340	2.98214603		65.00000000	0.52830769	4.64181884	1.410256
66	0.34924620	8.78422930	3.06785870		66.00000000	0.52030303	4.57046112	1.431748
67	0.35937405	8.78070640	3.15555802		67.00000000	0.51253731	4.50043967	1.453132
68	0.36950335	8.77608680	3.24279347		68.00000000	0.50500000	4.43192383	1.474486
69	0.37936845	8.77919100	3.33054808		69.00000000	0.49768116	4.36923796	1.495861
70	0.38951340	8.77786060	3.41909433		70.00000000	0.49057143	4.30616761	1.517330
71	0.39934281	8.76964860	3.50209611		71.00000000	0.48366197	4.24154553	1.538707
72	0.40945947	8.78274540	3.59617828		72.00000000	0.47694444	4.18888163	1.560063
73	0.41930670	8.76678280	3.67597077		73.00000000	0.47041096	4.12399070	1.581451
74	0.42940700	8.77840520	3.76950864		74.00000000	0.46405405	4.07365452	1.602935
75	0.43926316	8.76751230	3.85124516		75.00000000	0.45786667	4.01435163	1.624316
76	0.44944310	8.75145720	3.93328205		76.00000000	0.45184211	3.95427685	1.645662
77	0.45954040	8.75024890	4.02109288		77.00000000	0.44597403	3.90238373	1.667042
78	0.46941370	8.75792410	4.11108956		78.00000000	0.44025641	3.85573223	1.688518
79	0.47955120	8.73413090	4.18846295		79.00000000	0.43468354	3.79658298	1.709895
80	0.48939174	8.70501230	4.26016112		80.00000000	0.42925000	3.73662653	1.731249
81	0.49951810	8.67545510	4.33354685		81.00000000	0.42395062	3.67796454	1.752619
82	0.50933629	8.66014960	4.41092847		82.00000000	0.41878049	3.62670167	1.774108
83	0.51944405	8.57953830	4.45659012		83.00000000	0.41373494	3.54965476	1.795474
84	0.52921391	8.52028660	4.50905419		84.00000000	0.40880952	3.48317431	1.816875
85	0.53935510	8.39962480	4.53038047		85.00000000	0.40400000	3.39344842	1.838217
86	0.54951644	8.26574900	4.54216496		86.00000000	0.39930233	3.30053280	1.859688
87	0.55931973	8.02942280	4.49101459		87.00000000	0.39471264	3.16931470	1.881077
88	0.56945282	7.75886490	4.41830750		88.00000000	0.39022727	3.02772069	1.902467
89	0.57925093	7.33750250	4.25025515		89.00000000	0.38584270	2.83112175	1.923970
90	0.58938992	6.80755520	4.01230441		90.00000000	0.38155556	2.59746051	1.945341
91	0.59916425	6.12458940	3.66963501		91.00000000	0.37736264	2.31119121	1.966685
92	0.60928309	5.23586460	3.19012376		92.00000000	0.37326087	1.95434337	1.988162
93	0.61907601	4.16628070	2.57924443		93.00000000	0.36924731	1.53838795	2.009656
94	0.62916219	2.82660600	1.77839362		94.00000000	0.36531915	1.03261330	2.031038
95	0.63929147	1.24298560	0.79463009		95.00000000	0.36147368	0.44930658	2.052404
96	0.64903229	-0.54601544	-0.35438165		96.00000000	0.35770833	-0.19531427	2.073841
97	0.65914154	-2.65496090	-1.74999502		97.00000000	0.35402062	-0.93991090	2.095339
98	0.66885555	-4.98481890	-3.33412379		98.00000000	0.35040816	-1.74672123	2.116731
99	0.67908162	-7.70529320	-5.23252299		99.00000000	0.34686869	-2.67272493	2.138075
100	0.68668717	-9.99428840	-6.86294962		100.00000000	0.34340000	-3.43203864	2.159447
101	0.68670654	-10.00016600	-6.86717939		101.00000000	0.34000000	-3.40005644	2.180938
