# Supplementary material for: Study on the Electrical Injection Regeneration of Industrialized B-Doped Czochralski Silicon PERC Solar Cells
Source: Hindawi journal article supplement (doi:10.1155/2019/5357370), 2019-06-20
Supplement: f1 [file 5357370.f1.zip › section3.2/IVRawData_1-2-2.5h.csv]

16:36 02/04/2018
Test Lot:	JK-PERC
Recipe:	Recipe_YJX-LID
Cell Name:	1-2-2.5h
Test Order:	2
Test Condition:	Light
1	-0.29996991	8.76939390	-2.63055430		1.00000000	34.34000000	301.14098653	0.000000
2	-0.29016760	8.77207950	-2.54537326		2.00000000	17.17000000	150.61660502	0.061880
3	-0.27999911	8.77913190	-2.45814912		3.00000000	11.44666667	100.49179648	0.083315
4	-0.27021840	8.77635860	-2.37153358		4.00000000	8.58500000	75.34503858	0.104818
5	-0.26002535	8.77455900	-2.28160778		5.00000000	6.86800000	60.26367121	0.126213
6	-0.24987993	8.77482600	-2.19265291		6.00000000	5.72333333	50.22125414	0.147564
7	-0.24006945	8.77849770	-2.10744911		7.00000000	4.90571429	43.06480157	0.168947
8	-0.22990468	8.77320290	-2.01700041		8.00000000	4.29250000	37.65897345	0.190434
9	-0.22009344	8.77272030	-1.93081819		9.00000000	3.81555556	33.47280168	0.211814
10	-0.20993240	8.77594950	-1.84235614		10.00000000	3.43400000	30.13661058	0.233150
11	-0.20011149	8.77875140	-1.75672902		11.00000000	3.12181818	27.40566573	0.254532
12	-0.18998395	8.77594760	-1.66728919		12.00000000	2.86166667	25.11383672	0.276008
13	-0.18018091	8.76194570	-1.57873535		13.00000000	2.64153846	23.14501656	0.297400
14	-0.17007641	8.79123120	-1.49518104		14.00000000	2.45285714	21.56363424	0.318768
15	-0.16024211	8.76315780	-1.40422690		15.00000000	2.28933333	20.06178926	0.340149
16	-0.15008628	8.78218460	-1.31808542		16.00000000	2.14625000	18.84876370	0.361630
17	-0.13994980	8.77876000	-1.22858571		17.00000000	2.02000000	17.73309520	0.383033
18	-0.13009837	8.78164860	-1.14247817		18.00000000	1.90777778	16.75343405	0.404391
19	-0.11998124	8.76753810	-1.05194009		19.00000000	1.80736842	15.84617149	0.425782
20	-0.11015662	8.78320880	-0.96752859		20.00000000	1.71700000	15.08076951	0.447263
21	-0.09998441	8.77120300	-0.87698353		21.00000000	1.63523810	14.34300529	0.468643
22	-0.09017466	8.77784730	-0.79153940		22.00000000	1.56090909	13.70142165	0.490031
23	-0.08002925	8.77494620	-0.70225235		23.00000000	1.49304348	13.10137620	0.511396
24	-0.07023142	8.77386860	-0.61620121		24.00000000	1.43083333	12.55394366	0.532868
25	-0.06006069	8.77126310	-0.52680812		25.00000000	1.37360000	12.04820699	0.554270
26	-0.04992495	8.77467440	-0.43807519		26.00000000	1.32076923	11.58931996	0.575664
27	-0.04010107	8.77513310	-0.35189219		27.00000000	1.27185185	11.16066928	0.597025
28	-0.02991844	8.75896360	-0.26205451		28.00000000	1.22642857	10.74224322	0.618505
29	-0.02014219	8.78133300	-0.17687526		29.00000000	1.18413793	10.39830949	0.639889
30	-0.00995360	8.77626320	-0.08735545		30.00000000	1.14466667	10.04589594	0.661274
31	-0.00069613	8.77361300	-0.00610753		31.00000000	1.10774194	9.71889905	0.682881
32	0.00946099	8.77659510	0.08303531		32.00000000	1.07312500	9.41838362	0.704258
33	0.01929874	8.77399540	0.16932702		33.00000000	1.04060606	9.13027279	0.725618
34	0.02942154	8.78224950	0.25838727		34.00000000	1.01000000	8.87007200	0.746996
35	0.03923546	8.75899410	0.34366318		35.00000000	0.98114286	8.59382450	0.768484
36	0.04936645	8.79280190	0.43406940		36.00000000	0.95388889	8.38735603	0.789885
37	0.05918187	8.77089120	0.51907770		37.00000000	0.92810811	8.14033524	0.811233
38	0.06935974	8.77353480	0.60853011		38.00000000	0.90368421	7.92850487	0.832610
39	0.07949147	8.78035350	0.69796324		39.00000000	0.88051282	7.73121383	0.854101
40	0.08933442	8.76677420	0.78317470		40.00000000	0.85850000	7.52627565	0.875479
41	0.09945350	8.76764490	0.87197298		41.00000000	0.83756098	7.34343722	0.896828
42	0.10926668	8.79029370	0.96048621		42.00000000	0.81761905	7.18711156	0.918212
43	0.11942819	8.75848670	1.04601021		43.00000000	0.79860465	6.99456822	0.939697
44	0.12927710	8.78431030	1.13561016		44.00000000	0.78045455	6.85575490	0.961074
45	0.13942817	8.77746680	1.22382613		45.00000000	0.76311111	6.69818244	0.982438
46	0.14920712	8.77330780	1.30903999		46.00000000	0.74652174	6.54946500	1.003825
47	0.15935671	8.78454780	1.39987664		47.00000000	0.73063830	6.41832705	1.025292
48	0.16949812	8.75609300	1.48414130		48.00000000	0.71541667	6.26425487	1.046689
49	0.17933066	8.77872660	1.57429484		49.00000000	0.70081633	6.15227493	1.068043
50	0.18947652	8.76781560	1.66129519		50.00000000	0.68680000	6.02173575	1.089427
51	0.19926590	8.77434540	1.74842783		51.00000000	0.67333333	5.90805924	1.110919
52	0.20938869	8.77059750	1.83646392		52.00000000	0.66038462	5.79196766	1.132302
53	0.21922345	8.77147870	1.92291382		53.00000000	0.64792453	5.68325620	1.153731
54	0.22939092	8.77079960	2.01194179		54.00000000	0.63592593	5.57757886	1.175096
55	0.23920782	8.76650050	2.09701547		55.00000000	0.62436364	5.47348413	1.196571
56	0.24934997	8.76608470	2.18582296		56.00000000	0.61321429	5.37548837	1.217968
57	0.25950104	8.76977440	2.27576558		57.00000000	0.60245614	5.28340444	1.239355
58	0.26932019	8.76475810	2.36052632		58.00000000	0.59206897	5.18934126	1.260711
59	0.27945563	8.78742790	2.45569620		59.00000000	0.58203390	5.11458092	1.282192
60	0.28929412	8.75526710	2.53284729		60.00000000	0.57233333	5.01093120	1.303573
61	0.29942065	8.78024480	2.62898661		61.00000000	0.56295082	4.94284601	1.324962
62	0.30923310	8.76342960	2.70994250		62.00000000	0.55387097	4.85380923	1.346451
63	0.31942511	8.76784230	2.80066899		63.00000000	0.54507937	4.77916991	1.367835
64	0.32924572	8.77368830	2.88869932		64.00000000	0.53656250	4.70763213	1.389240
65	0.33937895	8.76220130	2.97370668		65.00000000	0.52830769	4.62913835	1.410660
66	0.34921297	8.76635550	3.06132504		66.00000000	0.52030303	4.56116133	1.432158
67	0.35934395	8.77052880	3.15163646		67.00000000	0.51253731	4.49522327	1.453550
68	0.36951959	8.76653390	3.23940601		68.00000000	0.50500000	4.42709962	1.474894
69	0.37935510	8.76960470	3.32679427		69.00000000	0.49768116	4.36446703	1.496272
70	0.38947046	8.76652910	3.41430412		70.00000000	0.49057143	4.30060870	1.517769
71	0.39931566	8.76115510	3.49846643		71.00000000	0.48366197	4.23743755	1.539159
72	0.40947342	8.76280400	3.58813532		72.00000000	0.47694444	4.17937069	1.560513
73	0.41926280	8.75739670	3.67165066		73.00000000	0.47041096	4.11957538	1.581908
74	0.42941165	8.75513170	3.75955555		74.00000000	0.46405405	4.06285436	1.603391
75	0.43924791	8.75055410	3.84366260		75.00000000	0.45786667	4.00658704	1.624771
76	0.44939527	8.73365400	3.92486280		76.00000000	0.45184211	3.94623261	1.646115
77	0.45953965	8.74935440	4.02067526		77.00000000	0.44597403	3.90198481	1.667487
78	0.46939003	8.72986220	4.09771028		78.00000000	0.44025641	3.84337779	1.688974
79	0.47953665	8.72259430	4.18280365		79.00000000	0.43468354	3.79156821	1.710358
80	0.48934910	8.69019600	4.25253959		80.00000000	0.42925000	3.73026663	1.731701
81	0.49946147	8.67601590	4.33333566		81.00000000	0.42395062	3.67820230	1.753088
82	0.50929254	8.61460970	4.38735646		82.00000000	0.41878049	3.60763045	1.774576
83	0.51944506	8.57328030	4.45334810		83.00000000	0.41373494	3.54706561	1.795986
84	0.52921808	8.49966340	4.49817555		84.00000000	0.40880952	3.47474335	1.817403
85	0.53934610	8.37260910	4.51573406		85.00000000	0.40400000	3.38253408	1.838768
86	0.54948527	8.22742370	4.52084813		86.00000000	0.39930233	3.28522942	1.860249
87	0.55929399	8.02000050	4.48553808		87.00000000	0.39471264	3.16559560	1.881651
88	0.56941903	7.70436620	4.38701273		88.00000000	0.39022727	3.00645381	1.903049
89	0.57921433	7.31051730	4.23435638		89.00000000	0.38584270	2.82070971	1.924456
90	0.58934158	6.76552250	3.98720372		90.00000000	0.38155556	2.58142270	1.945953
91	0.59912276	6.08214660	3.64395246		91.00000000	0.37736264	2.29517488	1.967332
92	0.60926491	5.17899800	3.15538175		92.00000000	0.37326087	1.93311730	1.988811
93	0.61903715	4.11120890	2.54499104		93.00000000	0.36924731	1.51805283	2.010329
94	0.62912351	2.76316140	1.73836980		94.00000000	0.36531915	1.00943577	2.031725
95	0.63928574	1.18196880	0.75561580		95.00000000	0.36147368	0.42725062	2.053153
96	0.64901114	-0.60128415	-0.39024011		96.00000000	0.35770833	-0.21508435	2.074556
97	0.65909523	-2.69522170	-1.77640777		97.00000000	0.35402062	-0.95416405	2.096053
98	0.66883099	-5.01121760	-3.35165763		98.00000000	0.35040816	-1.75597155	2.117443
99	0.67905653	-7.71693990	-5.24023843		99.00000000	0.34686869	-2.67676481	2.138794
100	0.68675816	-9.99398230	-6.86344890		100.00000000	0.34340000	-3.43193352	2.160166
101	0.68675226	-10.00003200	-6.86754458		101.00000000	0.34000000	-3.40001088	2.181661
16:36 02/04/2018
Test Lot:	JK-PERC
Recipe:	Recipe_YJX-LID
Cell Name:	1-2-2.5h
Test Order:	3
Test Condition:	Light
1	-0.29998404	8.77722640	-2.63302784		1.00000000	34.34000000	301.40995458	0.000000
2	-0.29011178	8.77091310	-2.54454521		2.00000000	17.17000000	150.59657793	0.021503
3	-0.28000060	8.77858640	-2.45800946		3.00000000	11.44666667	100.48555233	0.042878
4	-0.27021691	8.77677540	-2.37163313		4.00000000	8.58500000	75.34861681	0.064262
5	-0.26008415	8.77204130	-2.28146891		5.00000000	6.86800000	60.24637965	0.085782
6	-0.24993873	8.77349280	-2.19283565		6.00000000	5.72333333	50.21362379	0.107213
7	-0.24010591	8.76254840	-2.10393966		7.00000000	4.90571429	42.98655887	0.128569
8	-0.22997688	8.78222940	-2.01970972		8.00000000	4.29250000	37.69771970	0.149955
9	-0.22009493	8.78138160	-1.93273757		9.00000000	3.81555556	33.50584935	0.171438
10	-0.20998228	8.76284410	-1.84004198		10.00000000	3.43400000	30.09160664	0.192804
11	-0.20012192	8.79450890	-1.75997401		11.00000000	3.12181818	27.45485778	0.214162
12	-0.18998989	8.76977440	-1.66616847		12.00000000	2.86166667	25.09617107	0.235534
13	-0.18018983	8.76713470	-1.57974851		13.00000000	2.64153846	23.15872351	0.257011
14	-0.17006153	8.76792240	-1.49108630		14.00000000	2.45285714	21.50646109	0.278407
15	-0.16022724	8.77627660	-1.40619858		15.00000000	2.28933333	20.09182256	0.299749
16	-0.15008926	8.76860810	-1.31607390		16.00000000	2.14625000	18.81962513	0.321125
17	-0.13992450	8.78743460	-1.22957739		17.00000000	2.02000000	17.75061789	0.342613
18	-0.13012220	8.77641490	-1.14200641		18.00000000	1.90777778	16.74344931	0.363979
19	-0.11996710	8.78173540	-1.05351933		19.00000000	1.80736842	15.87183124	0.385339
20	-0.11010674	8.76306440	-0.96487245		20.00000000	1.71700000	15.04618157	0.406707
21	-0.09995315	8.77405550	-0.87699444		21.00000000	1.63523810	14.34766980	0.428177
22	-0.09015308	8.77581600	-0.79116681		22.00000000	1.56090909	13.69825097	0.449567
23	-0.07999799	8.77446750	-0.70193974		23.00000000	1.49304348	13.10066148	0.470920
24	-0.07017857	8.77732940	-0.61598041		24.00000000	1.43083333	12.55889548	0.492295
25	-0.06004953	8.77402880	-0.52687627		25.00000000	1.37360000	12.05200596	0.513771
26	-0.04989295	8.76673890	-0.43739844		26.00000000	1.32076923	11.57883899	0.535142
27	-0.04009437	8.78130340	-0.35208081		27.00000000	1.27185185	11.16851699	0.556539
28	-0.02991472	8.77441880	-0.26248425		28.00000000	1.22642857	10.76119791	0.577934
29	-0.02010274	8.76990990	-0.17629923		29.00000000	1.18413793	10.38478296	0.599408
30	-0.00998635	8.77380660	-0.08761832		30.00000000	1.14466667	10.04308395	0.620793
31	-0.00067677	8.76701450	-0.00593329		31.00000000	1.10774194	9.71158961	0.642298
32	0.00947960	8.77840810	0.08321579		32.00000000	1.07312500	9.42032919	0.663672
33	0.01928236	8.77520370	0.16920666		33.00000000	1.04060606	9.13153015	0.685143
34	0.02943642	8.77220150	0.25822222		34.00000000	1.01000000	8.85992352	0.706527
35	0.03924960	8.77626990	0.34446511		35.00000000	0.98114286	8.61077452	0.727899
36	0.04936794	8.76704600	0.43281098		36.00000000	0.95388889	8.36278777	0.749394
37	0.05920271	8.77819250	0.51969274		37.00000000	0.92810811	8.14711163	0.770769
38	0.06935304	8.76420590	0.60782436		38.00000000	0.90368421	7.92007449	0.792107
39	0.07948924	8.77462960	0.69748863		39.00000000	0.88051282	7.72617386	0.813483
40	0.08932921	8.77552410	0.78391066		40.00000000	0.85850000	7.53378744	0.834959
41	0.09946020	8.77018360	0.87228421		41.00000000	0.83756098	7.34556353	0.856339
42	0.10928082	8.78013320	0.95950016		42.00000000	0.81761905	7.17880414	0.877695
43	0.11942819	8.76200580	1.04643049		43.00000000	0.79860465	6.99737859	0.899066
44	0.12923914	8.77420520	1.13397073		44.00000000	0.78045455	6.84786833	0.920605
45	0.13939096	8.76479150	1.22173270		45.00000000	0.76311111	6.68850978	0.941983
46	0.14922498	8.76916410	1.30857834		46.00000000	0.74652174	6.54637163	0.963346
47	0.15936416	8.77840810	1.39896363		47.00000000	0.73063830	6.41384115	0.984722
48	0.16951673	8.76319790	1.48550865		48.00000000	0.71541667	6.26933783	1.006194
49	0.17932619	8.78030870	1.57453931		49.00000000	0.70081633	6.15338369	1.027570
50	0.18945345	8.76392840	1.66035647		50.00000000	0.68680000	6.01906603	1.048934
51	0.19925547	8.77059080	1.74758819		51.00000000	0.67333333	5.90553114	1.070314
52	0.20939910	8.77555080	1.83759244		52.00000000	0.66038462	5.79523874	1.091801
53	0.21925695	8.76749800	1.92233487		53.00000000	0.64792453	5.68067701	1.113188
54	0.22937827	8.75387860	2.00794953		54.00000000	0.63592593	5.56681835	1.134534
55	0.23923536	8.77226830	2.09863676		55.00000000	0.62436364	5.47708533	1.155901
56	0.24937676	8.76891330	2.18676319		56.00000000	0.61321429	5.37722291	1.177384
57	0.25952411	8.77164750	2.27645401		57.00000000	0.60245614	5.28453290	1.198762
58	0.26932988	8.76804540	2.36149662		58.00000000	0.59206897	5.19128757	1.220126
59	0.27946383	8.77159020	2.45134219		59.00000000	0.58203390	5.10536284	1.241502
60	0.28931272	8.76425740	2.53561115		60.00000000	0.57233333	5.01607665	1.262984
61	0.29945561	8.76087950	2.62349451		61.00000000	0.56295082	4.93194430	1.284372
62	0.30925691	8.77088930	2.71245812		62.00000000	0.55387097	4.85794094	1.305753
63	0.31940871	8.77519040	2.80287225		63.00000000	0.54507937	4.78317521	1.327102
64	0.32924870	8.75939080	2.88401803		64.00000000	0.53656250	4.69996063	1.348581
65	0.33940053	8.77414510	2.97794950		65.00000000	0.52830769	4.63544835	1.369950
66	0.34921372	8.75661560	3.05793031		66.00000000	0.52030303	4.55609363	1.391322
67	0.35932311	8.76758480	3.15039584		67.00000000	0.51253731	4.49371436	1.412815
68	0.36950770	8.76929570	3.24032228		68.00000000	0.50500000	4.42849433	1.434191
69	0.37931493	8.75146870	3.31956274		69.00000000	0.49768116	4.35544109	1.455550
70	0.38946673	8.76003360	3.41174164		70.00000000	0.49057143	4.29742220	1.476930
71	0.39927024	8.76810930	3.50084510		71.00000000	0.48366197	4.24080103	1.498404
72	0.40944070	8.75493340	3.58462606		72.00000000	0.47694444	4.17561685	1.519825
73	0.41923824	8.75620650	3.67093660		73.00000000	0.47041096	4.11901550	1.541176
74	0.42939898	8.74685760	3.75589173		74.00000000	0.46405405	4.05901473	1.562556
75	0.43921739	8.74903390	3.84272783		75.00000000	0.45786667	4.00589099	1.584037
76	0.44939378	8.74308110	3.92908626		76.00000000	0.45184211	3.95049217	1.605420
77	0.45953295	8.74104880	4.01679994		77.00000000	0.44597403	3.89828072	1.626765
78	0.46936175	8.70930480	4.08781454		78.00000000	0.44025641	3.83432727	1.648144
79	0.47951880	8.71761230	4.18025899		79.00000000	0.43468354	3.78940261	1.669611
80	0.48934910	8.68352410	4.24927470		80.00000000	0.42925000	3.72740272	1.690976
81	0.49946222	8.65807250	4.32438011		81.00000000	0.42395062	3.67059518	1.712347
82	0.50928432	8.61865520	4.38934595		82.00000000	0.41878049	3.60932463	1.733722
83	0.51942497	8.57474040	4.45393428		83.00000000	0.41373494	3.54766970	1.755199
84	0.52918535	8.49678800	4.49637573		84.00000000	0.40880952	3.47356786	1.776586
85	0.53934532	8.37855340	4.51893356		85.00000000	0.40400000	3.38493557	1.797930
86	0.54949343	8.22557830	4.51990123		86.00000000	0.39930233	3.28449254	1.819300
87	0.55927539	8.01578140	4.48302927		87.00000000	0.39471264	3.16393027	1.840776
88	0.56941527	7.72090050	4.39639864		88.00000000	0.39022727	3.01290595	1.862151
89	0.57920766	7.31095120	4.23455894		89.00000000	0.38584270	2.82087713	1.883527
90	0.58932894	6.77987380	3.99557584		90.00000000	0.38155556	2.58689851	1.904891
91	0.59913248	6.08782150	3.64741159		91.00000000	0.37736264	2.29731638	1.926359
92	0.60925305	5.19116160	3.16273104		92.00000000	0.37326087	1.93765749	1.947742
93	0.61905652	4.11719700	2.54877765		93.00000000	0.36924731	1.52026392	1.969123
94	0.62916368	2.76075150	1.73696457		94.00000000	0.36531915	1.00855539	1.990593
95	0.63931626	1.17332550	0.75012607		95.00000000	0.36147368	0.42412629	2.012090
96	0.64897835	-0.64039785	-0.41560434		96.00000000	0.35770833	-0.22907565	2.033481
97	0.65911084	-2.74779180	-1.81109936		97.00000000	0.35402062	-0.97277495	2.054862
98	0.66883099	-5.10986420	-3.41763553		98.00000000	0.35040816	-1.79053813	2.076359
99	0.67908108	-7.85354950	-5.33319688		99.00000000	0.34686869	-2.72415040	2.097796
100	0.68616945	-9.99500750	-6.85826880		100.00000000	0.34340000	-3.43228558	2.119158
101	0.68617541	-10.00028600	-6.86195035		101.00000000	0.34000000	-3.40009724	2.140548
16:36 02/04/2018
Test Lot:	JK-PERC
Recipe:	Recipe_YJX-LID
Cell Name:	1-2-2.5h
Test Order:	4
Test Condition:	Light
1	-0.29995543	8.78538510	-2.63522397		1.00000000	34.34000000	301.69012433	0.000000
2	-0.29009151	8.77515790	-2.54559881		2.00000000	17.17000000	150.66946114	0.061760
3	-0.27997157	8.77861600	-2.45776290		3.00000000	11.44666667	100.48589115	0.083307
4	-0.27016494	8.77595710	-2.37095592		4.00000000	8.58500000	75.34159170	0.104740
5	-0.25999960	8.77775000	-2.28221149		5.00000000	6.86800000	60.28558700	0.126104
6	-0.24986327	8.77760790	-2.19320181		6.00000000	5.72333333	50.23717588	0.147498
7	-0.24003880	8.78119750	-2.10782811		7.00000000	4.90571429	43.07804602	0.168982
8	-0.22990546	8.77433680	-2.01726794		8.00000000	4.29250000	37.66384071	0.190372
9	-0.22002591	8.77662660	-1.93108525		9.00000000	3.81555556	33.48770638	0.211726
10	-0.20990968	8.77749630	-1.84248144		10.00000000	3.43400000	30.14192229	0.233094
11	-0.20007256	8.77078530	-1.75479347		11.00000000	3.12181818	27.38079702	0.254588
12	-0.18993698	8.77602770	-1.66689220		12.00000000	2.86166667	25.11406593	0.275972
13	-0.18011846	8.76864620	-1.57939505		13.00000000	2.64153846	23.16271619	0.297318
14	-0.16997692	8.77581690	-1.49168633		14.00000000	2.45285714	21.52582517	0.318699
15	-0.16016585	8.77794840	-1.40592757		15.00000000	2.28933333	20.09564987	0.340176
16	-0.15001762	8.76376440	-1.31471908		16.00000000	2.14625000	18.80922934	0.361549
17	-0.13987459	8.77734760	-1.22772790		17.00000000	2.02000000	17.73024215	0.382917
18	-0.13004863	8.77992250	-1.14181689		18.00000000	1.90777778	16.75014104	0.404292
19	-0.11992124	8.76203540	-1.05075415		19.00000000	1.80736842	15.83622609	0.425780
20	-0.11005137	8.78571510	-0.96687998		20.00000000	1.71700000	15.08507283	0.447166
21	-0.09993663	8.76378150	-0.87582282		21.00000000	1.63523810	14.33086937	0.468510
22	-0.09008760	8.77230070	-0.79027552		22.00000000	1.56090909	13.69276391	0.489888
23	-0.07995500	8.77727410	-0.70178692		23.00000000	1.49304348	13.10485185	0.511371
24	-0.07013648	8.77433400	-0.61540090		24.00000000	1.43083333	12.55460957	0.532775
25	-0.05999048	8.77459050	-0.52639193		25.00000000	1.37360000	12.05277751	0.554144
26	-0.04988989	8.77402020	-0.43773486		26.00000000	1.32076923	11.58845591	0.575526
27	-0.04003564	8.76993080	-0.35110982		27.00000000	1.27185185	11.15405273	0.597008
28	-0.02988890	8.77317050	-0.26222042		28.00000000	1.22642857	10.75966696	0.618398
29	-0.02007187	8.76728060	-0.17597573		29.00000000	1.18413793	10.38166951	0.639766
30	-0.00993332	8.77590370	-0.08717382		30.00000000	1.14466667	10.04548444	0.661130
31	-0.00065142	8.76992130	-0.00571292		31.00000000	1.10774194	9.71480959	0.682720
32	0.00949214	8.76528640	0.08320129		32.00000000	1.07312500	9.40624797	0.704096
33	0.01929623	8.77492620	0.16932302		33.00000000	1.04060606	9.13124139	0.725478
34	0.02944045	8.76643940	0.25808795		34.00000000	1.01000000	8.85410379	0.746829
35	0.03927507	8.77215100	0.34452680		35.00000000	0.98114286	8.60673330	0.768310
36	0.04943566	8.76775460	0.43343974		36.00000000	0.95388889	8.36346369	0.789722
37	0.05923678	8.77044870	0.51953314		37.00000000	0.92810811	8.13992455	0.811104
38	0.06938770	8.77183060	0.60865712		38.00000000	0.90368421	7.92696481	0.832579
39	0.07952374	8.77988240	0.69820904		39.00000000	0.88051282	7.73079902	0.853957
40	0.08934792	8.76641650	0.78326109		40.00000000	0.85850000	7.52596857	0.875307
41	0.09950034	8.77752110	0.87336630		41.00000000	0.83756098	7.35170914	0.896684
42	0.10932378	8.78004650	0.95986787		42.00000000	0.81761905	7.17873326	0.918162
43	0.11949331	8.76006790	1.04676951		43.00000000	0.79860465	6.99583097	0.939536
44	0.12930410	8.75176050	1.13163851		44.00000000	0.78045455	6.83035126	0.960873
45	0.13947883	8.77533820	1.22397390		45.00000000	0.76311111	6.69655808	0.982262
46	0.14926805	8.75968070	1.30754046		46.00000000	0.74652174	6.53929207	1.003742
47	0.15944874	8.76616570	1.39775408		47.00000000	0.73063830	6.40489639	1.025118
48	0.16958477	8.78432850	1.48968833		48.00000000	0.71541667	6.28445501	1.046485
49	0.17938292	8.76690010	1.57263214		49.00000000	0.70081633	6.14398672	1.067869
50	0.18954648	8.78128620	1.66446189		50.00000000	0.68680000	6.03098736	1.089389
51	0.19931263	8.76006600	1.74599179		51.00000000	0.67333333	5.89844444	1.110767
52	0.20946504	8.78364280	1.83986609		52.00000000	0.66038462	5.80058257	1.132103
53	0.21927285	8.76591590	1.92212736		53.00000000	0.64792453	5.67965192	1.153478
54	0.22943196	8.76313020	2.01054214		54.00000000	0.63592593	5.57270169	1.174970
55	0.23924573	8.76649670	2.09734690		55.00000000	0.62436364	5.47348176	1.196342
56	0.24940260	8.78140640	2.19010559		56.00000000	0.61321429	5.38488385	1.217697
57	0.25955427	8.75782010	2.27312960		57.00000000	0.60245614	5.27620250	1.239075
58	0.26935911	8.77214430	2.36285698		58.00000000	0.59206897	5.19371440	1.260552
59	0.27947059	8.77857400	2.45335326		59.00000000	0.58203390	5.10942765	1.281951
60	0.28934464	8.76223090	2.53530455		60.00000000	0.57233333	5.01491682	1.303310
61	0.29946133	8.77610590	2.62810435		61.00000000	0.56295082	4.94051601	1.324670
62	0.30927584	8.76586910	2.71107153		62.00000000	0.55387097	4.85516040	1.346147
63	0.31941932	8.77567860	2.80312129		63.00000000	0.54507937	4.78344132	1.367516
64	0.32925913	8.76069360	2.88453835		64.00000000	0.53656250	4.70065966	1.388899
65	0.33938700	8.76207920	2.97373577		65.00000000	0.52830769	4.62907384	1.410259
66	0.34922680	8.77432540	3.06422958		66.00000000	0.52030303	4.56530809	1.431737
67	0.35939261	8.76396850	3.14970551		67.00000000	0.51253731	4.49186087	1.453133
68	0.36952120	8.77088070	3.24102636		68.00000000	0.50500000	4.42929475	1.474518
69	0.37934315	8.75789360	3.32224695		69.00000000	0.49768116	4.35863864	1.495999
70	0.38949558	8.77110960	3.41630842		70.00000000	0.49057143	4.30285577	1.517383
71	0.39931753	8.75269320	3.49510383		71.00000000	0.48366197	4.23334485	1.538750
72	0.40948260	8.75552370	3.58523461		72.00000000	0.47694444	4.17589839	1.560121
73	0.41926584	8.75474450	3.67056531		73.00000000	0.47041096	4.11832776	1.581616
74	0.42943016	8.75771810	3.76082828		74.00000000	0.46405405	4.06405459	1.602991
75	0.43928114	8.73397830	3.83667194		75.00000000	0.45786667	3.99899753	1.624332
76	0.44943950	8.75642970	3.93548539		76.00000000	0.45184211	3.95652363	1.645721
77	0.45957553	8.72961430	4.01191712		77.00000000	0.44597403	3.89318123	1.667199
78	0.46943098	8.72562030	4.09607649		78.00000000	0.44025641	3.84151027	1.688585
79	0.47955140	8.70612620	4.17503501		79.00000000	0.43468354	3.78440979	1.709942
80	0.48938304	8.68824200	4.25187828		80.00000000	0.42925000	3.72942788	1.731321
81	0.49951386	8.65701870	4.32430083		81.00000000	0.42395062	3.67014842	1.752795
82	0.50933063	8.62065410	4.39076318		82.00000000	0.41878049	3.61016173	1.774189
83	0.51945251	8.56310840	4.44812815		83.00000000	0.41373494	3.54285714	1.795542
84	0.52923054	8.48532870	4.49069509		84.00000000	0.40880952	3.46888319	1.816928
85	0.53937924	8.37121490	4.51525953		85.00000000	0.40400000	3.38197082	1.838417
86	0.54952049	8.22259520	4.51848454		86.00000000	0.39930233	3.28330139	1.859791
87	0.55932683	7.98639870	4.46700707		87.00000000	0.39471264	3.15233254	1.881162
88	0.56945169	7.69909330	4.38426169		88.00000000	0.39022727	3.00439618	1.902539
89	0.57924831	7.28206400	4.21812327		89.00000000	0.38584270	2.80973121	1.924006
90	0.58939034	6.74000260	3.97249242		90.00000000	0.38155556	2.57168544	1.945395
91	0.59914827	6.04889490	3.62418491		91.00000000	0.37736264	2.28262693	1.966756
92	0.60928804	5.14827870	3.13678464		92.00000000	0.37326087	1.92165098	1.988228
93	0.61906457	4.07127950	2.52038489		93.00000000	0.36924731	1.50330901	2.009742
94	0.62916863	2.72900390	1.71700365		94.00000000	0.36531915	0.99695738	2.031184
95	0.63931882	1.13943590	0.72846282		95.00000000	0.36147368	0.41187609	2.052605
96	0.64898890	-0.63773865	-0.41388530		96.00000000	0.35770833	-0.22812443	2.073957
97	0.65913016	-2.73431440	-1.80226909		97.00000000	0.35402062	-0.96800368	2.095428
98	0.66884941	-5.04629330	-3.37521030		98.00000000	0.35040816	-1.76826237	2.116813
99	0.67911869	-7.75429150	-5.26608429		99.00000000	0.34686869	-2.68972091	2.138191
100	0.68667585	-9.99423030	-6.86279659		100.00000000	0.34340000	-3.43201869	2.159678
101	0.68665874	-9.99994090	-6.86654682		101.00000000	0.34000000	-3.39997991	2.181065
