# Supplementary material for: Study on the Electrical Injection Regeneration of Industrialized B-Doped Czochralski Silicon PERC Solar Cells
Source: Hindawi journal article supplement (doi:10.1155/2019/5357370), 2019-06-20
Supplement: f1 [file 5357370.f1.zip › section3.2/IVRawData_1-2-2h.csv]

15:57 02/04/2018
Test Lot:	JK-PERC
Recipe:	Recipe_YJX-LID
Cell Name:	1-2-2h
Test Order:	2
Test Condition:	Light
1	-0.29990065	8.78978730	-2.63606292		1.00000000	34.34000000	301.84129588	0.000000
2	-0.29012951	8.80098530	-2.55342555		2.00000000	17.17000000	151.11291760	0.061720
3	-0.28001377	8.78119280	-2.45885490		3.00000000	11.44666667	100.51538692	0.083101
4	-0.27019203	8.80484870	-2.37899994		4.00000000	8.58500000	75.58962609	0.104609
5	-0.26001674	8.78931330	-2.28536859		5.00000000	6.86800000	60.36500374	0.125982
6	-0.24986377	8.78381920	-2.19475818		6.00000000	5.72333333	50.27272522	0.147367
7	-0.24003458	8.80856040	-2.11435910		7.00000000	4.90571429	43.21228059	0.168712
8	-0.22987567	8.79240230	-2.02115937		8.00000000	4.29250000	37.74138687	0.190183
9	-0.22005095	8.77969550	-1.93198034		9.00000000	3.81555556	33.49941594	0.211622
10	-0.20992032	8.79468540	-1.84618317		10.00000000	3.43400000	30.20094966	0.233018
11	-0.20013356	8.78914830	-1.75900354		11.00000000	3.12181818	27.43812297	0.254427
12	-0.18995082	8.80864240	-1.67320885		12.00000000	2.86166667	25.20739833	0.275901
13	-0.18015587	8.77795890	-1.58140082		13.00000000	2.64153846	23.18731605	0.297279
14	-0.17002599	8.80198480	-1.49656618		14.00000000	2.45285714	21.59001129	0.318667
15	-0.16018936	8.79122920	-1.40826138		15.00000000	2.28933333	20.12605405	0.340025
16	-0.15004385	8.80300620	-1.32083694		16.00000000	2.14625000	18.89345206	0.361515
17	-0.13989313	8.80197140	-1.23133533		17.00000000	2.02000000	17.77998223	0.382903
18	-0.13008700	8.79035470	-1.14351087		18.00000000	1.90777778	16.77004336	0.404272
19	-0.11993405	8.79093070	-1.05433192		19.00000000	1.80736842	15.88845054	0.425625
20	-0.11010635	8.79929640	-0.96885841		20.00000000	1.71700000	15.10839192	0.447109
21	-0.09995861	8.79371070	-0.87900706		21.00000000	1.63523810	14.37981074	0.468519
22	-0.09012048	8.78949830	-0.79211380		22.00000000	1.56090909	13.71960780	0.489914
23	-0.07997794	8.78518300	-0.70262087		23.00000000	1.49304348	13.11666018	0.511267
24	-0.07013759	8.80503560	-0.61756398		24.00000000	1.43083333	12.59853844	0.532741
25	-0.06003376	8.78893760	-0.52763294		25.00000000	1.37360000	12.07248469	0.554107
26	-0.04986071	8.78132820	-0.43784321		26.00000000	1.32076923	11.59810809	0.575497
27	-0.04006501	8.79302500	-0.35229263		27.00000000	1.27185185	11.18342513	0.596987
28	-0.02990535	8.79027460	-0.26287626		28.00000000	1.22642857	10.78064392	0.618365
29	-0.02006723	8.78778170	-0.17634645		29.00000000	1.18413793	10.40594564	0.639729
30	-0.00990088	8.78977390	-0.08702646		30.00000000	1.14466667	10.06136119	0.661107
31	-0.00068722	8.78916650	-0.00604011		31.00000000	1.10774194	9.73612831	0.682703
32	0.00946851	8.78532980	0.08318395		32.00000000	1.07312500	9.42775704	0.704078
33	0.01928699	8.79425620	0.16961477		33.00000000	1.04060606	9.15135630	0.725429
34	0.02941882	8.78865430	0.25855186		34.00000000	1.01000000	8.87654084	0.746805
35	0.03924699	8.79191680	0.34505625		35.00000000	0.98114286	8.62612637	0.768283
36	0.04935351	8.78634930	0.43363718		36.00000000	0.95388889	8.38120097	0.789658
37	0.05921144	8.79491420	0.52075957		37.00000000	0.92810811	8.16263118	0.811023
38	0.06935965	8.78507140	0.60932943		38.00000000	0.90368421	7.93893031	0.832393
39	0.07951009	8.79430290	0.69923577		39.00000000	0.88051282	7.74349645	0.853870
40	0.08927796	8.78626920	0.78442019		40.00000000	0.85850000	7.54301211	0.875273
41	0.09944329	8.78253460	0.87336411		41.00000000	0.83756098	7.35590825	0.896621
42	0.10929973	8.78776450	0.96050029		42.00000000	0.81761905	7.18504364	0.917995
43	0.11944942	8.79555130	1.05062350		43.00000000	0.79860465	7.02416818	0.939477
44	0.12925674	8.78905300	1.13604434		44.00000000	0.78045455	6.85945636	0.960871
45	0.13939601	8.79964350	1.22663519		45.00000000	0.76311111	6.71510573	0.982237
46	0.14921600	8.78061200	1.31020780		46.00000000	0.74652174	6.55491774	1.003620
47	0.15938579	8.78824230	1.40072094		47.00000000	0.73063830	6.42102640	1.025092
48	0.16953771	8.79469390	1.49103226		48.00000000	0.71541667	6.29187059	1.046466
49	0.17933014	8.78845600	1.57603504		49.00000000	0.70081633	6.15909345	1.067831
50	0.18946496	8.78784850	1.66498936		50.00000000	0.68680000	6.03549435	1.089180
51	0.19924474	8.79770950	1.75289734		51.00000000	0.67333333	5.92379106	1.110659
52	0.20943834	8.77937510	1.83873775		52.00000000	0.66038462	5.79776425	1.132038
53	0.21926129	8.80067630	1.92964764		53.00000000	0.64792453	5.70217404	1.153413
54	0.22941247	8.78787520	2.01604816		54.00000000	0.63592593	5.58843767	1.174761
55	0.23923618	8.79103570	2.10313380		55.00000000	0.62436364	5.48880302	1.196227
56	0.24938214	8.79128070	2.19238839		56.00000000	0.61321429	5.39093891	1.217627
57	0.25952736	8.77682400	2.27782596		57.00000000	0.60245614	5.28765151	1.239028
58	0.26935107	8.79187490	2.36810091		58.00000000	0.59206897	5.20539628	1.260506
59	0.27948290	8.79347420	2.45762567		59.00000000	0.58203390	5.11810007	1.281901
60	0.28930807	8.77524660	2.53874966		60.00000000	0.57233333	5.02236614	1.303251
61	0.29948086	8.79543110	2.63406327		61.00000000	0.56295082	4.95139515	1.324628
62	0.30929041	8.77927880	2.71534674		62.00000000	0.55387097	4.86258765	1.346102
63	0.31943041	8.79002760	2.80780212		63.00000000	0.54507937	4.79126266	1.367479
64	0.32924369	8.78634930	2.89285007		64.00000000	0.53656250	4.71442555	1.388822
65	0.33939636	8.78188040	2.98053824		65.00000000	0.52830769	4.63953497	1.410205
66	0.34922826	8.79063320	3.06993754		66.00000000	0.52030303	4.57379309	1.431681
67	0.35936007	8.77817250	3.15452468		67.00000000	0.51253731	4.49914095	1.453054
68	0.36951125	8.79164310	3.24861103		68.00000000	0.50500000	4.43977977	1.474430
69	0.37932083	8.77919670	3.33013218		69.00000000	0.49768116	4.36924079	1.495806
70	0.38947943	8.78140640	3.42017716		70.00000000	0.49057143	4.30790708	1.517282
71	0.39928603	8.78297330	3.50691854		71.00000000	0.48366197	4.24799018	1.538671
72	0.40943646	8.77276330	3.59188915		72.00000000	0.47694444	4.18412072	1.560019
73	0.41928250	8.78001590	3.68130702		73.00000000	0.47041096	4.13021570	1.581395
74	0.42941281	8.77078440	3.76628718		74.00000000	0.46405405	4.07011806	1.602878
75	0.43925586	8.76581100	3.85043385		75.00000000	0.45786667	4.01357266	1.624249
76	0.44939291	8.77607920	3.94390777		76.00000000	0.45184211	3.96540210	1.645603
77	0.45951879	8.75225350	4.02182494		77.00000000	0.44597403	3.90327773	1.666976
78	0.46940053	8.75297260	4.10864998		78.00000000	0.44025641	3.85355230	1.688445
79	0.47952566	8.73181630	4.18712997		79.00000000	0.43468354	3.79557686	1.709841
80	0.48933595	8.70505330	4.25969553		80.00000000	0.42925000	3.73664413	1.731210
81	0.49947673	8.68454930	4.33773029		81.00000000	0.42395062	3.68182004	1.752569
82	0.50930935	8.63242150	4.39657298		82.00000000	0.41878049	3.61508969	1.774049
83	0.51944488	8.58970550	4.46187854		83.00000000	0.41373494	3.55386129	1.795417
84	0.52919269	8.50741960	4.50206426		84.00000000	0.40880952	3.47791416	1.816798
85	0.53935206	8.40288260	4.53211204		85.00000000	0.40400000	3.39476457	1.838151
86	0.54950178	8.23964210	4.52769800		86.00000000	0.39930233	3.29010825	1.859616
87	0.55930388	8.02653980	4.48927485		87.00000000	0.39471264	3.16817674	1.880983
88	0.56943792	7.71730520	4.39452622		88.00000000	0.39022727	3.01150296	1.902372
89	0.57921249	7.32197330	4.24097839		89.00000000	0.38584270	2.82512992	1.923854
90	0.58935100	6.78618430	3.99944450		90.00000000	0.38155556	2.58930632	1.945239
91	0.59915239	6.08714340	3.64712652		91.00000000	0.37736264	2.29706049	1.966599
92	0.60926485	5.19446130	3.16480268		92.00000000	0.37326087	1.93888914	1.988065
93	0.61904985	4.12024350	2.55063612		93.00000000	0.36924731	1.52138884	2.009570
94	0.62917501	2.76778010	1.74141807		94.00000000	0.36531915	1.01112307	2.030950
95	0.63929790	1.18611340	0.75827981		95.00000000	0.36147368	0.42874878	2.052285
96	0.64896977	-0.58567983	-0.38008850		96.00000000	0.35770833	-0.20950256	2.073664
97	0.65910310	-2.69652560	-1.77728838		97.00000000	0.35402062	-0.95462566	2.095143
98	0.66886425	-5.01656390	-3.35540025		98.00000000	0.35040816	-1.75784494	2.116521
99	0.67907053	-7.71762610	-5.24081245		99.00000000	0.34686869	-2.67700283	2.137881
100	0.68673807	-9.99424840	-6.86343086		100.00000000	0.34340000	-3.43202490	2.159256
101	0.68674105	-10.00048000	-6.86774014		101.00000000	0.34000000	-3.40016320	2.180729
15:57 02/04/2018
Test Lot:	JK-PERC
Recipe:	Recipe_YJX-LID
Cell Name:	1-2-2h
Test Order:	3
Test Condition:	Light
1	-0.29987729	8.78871920	-2.63553730		1.00000000	34.34000000	301.80461733	0.000000
2	-0.29009944	8.79327870	-2.55092523		2.00000000	17.17000000	150.98059528	0.061791
3	-0.27994797	8.79273130	-2.46150728		3.00000000	11.44666667	100.64746428	0.083221
4	-0.27009866	8.79102230	-2.37444334		4.00000000	8.58500000	75.47092645	0.104707
5	-0.25997916	8.78564740	-2.28408523		5.00000000	6.86800000	60.33982634	0.126094
6	-0.24979271	8.79330350	-2.19650311		6.00000000	5.72333333	50.32700703	0.147443
7	-0.23999178	8.78894620	-2.10927484		7.00000000	4.90571429	43.11605893	0.168826
8	-0.22985592	8.79741100	-2.02213700		8.00000000	4.29250000	37.76288672	0.190308
9	-0.22002673	8.78304390	-1.93250443		9.00000000	3.81555556	33.51219195	0.211686
10	-0.20989907	8.78918650	-1.84484207		10.00000000	3.43400000	30.18206644	0.233116
11	-0.20006390	8.78509810	-1.75758099		11.00000000	3.12181818	27.42547898	0.254499
12	-0.18992656	8.79749770	-1.67087847		12.00000000	2.86166667	25.17550592	0.275981
13	-0.18013382	8.78761100	-1.58294594		13.00000000	2.64153846	23.21281244	0.297366
14	-0.16996895	8.78462600	-1.49311366		14.00000000	2.45285714	21.54743263	0.318748
15	-0.16014197	8.78722760	-1.40720394		15.00000000	2.28933333	20.11689305	0.340078
16	-0.15001133	8.79227730	-1.31894121		16.00000000	2.14625000	18.87042516	0.361556
17	-0.13987027	8.78167530	-1.22829530		17.00000000	2.02000000	17.73898411	0.382932
18	-0.13003808	8.79865260	-1.14415989		18.00000000	1.90777778	16.78587390	0.404311
19	-0.11992605	8.78005310	-1.05295709		19.00000000	1.80736842	15.86879071	0.425794
20	-0.11009610	8.79040340	-0.96778913		20.00000000	1.71700000	15.09312264	0.447167
21	-0.09992898	8.79905320	-0.87928044		21.00000000	1.63523810	14.38854699	0.468524
22	-0.09008788	8.78525350	-0.79144483		22.00000000	1.56090909	13.71298205	0.489895
23	-0.07997584	8.80354400	-0.70407079		23.00000000	1.49304348	13.14407395	0.511378
24	-0.07011463	8.78099250	-0.61567601		24.00000000	1.43083333	12.56413677	0.532776
25	-0.05996165	8.79772090	-0.52752590		25.00000000	1.37360000	12.08454943	0.554123
26	-0.04984069	8.78846260	-0.43802300		26.00000000	1.32076923	11.60753099	0.575491
27	-0.03998692	8.78330420	-0.35121728		27.00000000	1.27185185	11.17106171	0.596979
28	-0.02983618	8.78395650	-0.26207972		28.00000000	1.22642857	10.77289522	0.618362
29	-0.02001889	8.78691580	-0.17590427		29.00000000	1.18413793	10.40492030	0.639716
30	-0.00987187	8.78798870	-0.08675386		30.00000000	1.14466667	10.05931773	0.661096
31	-0.00063810	8.79549980	-0.00561243		31.00000000	1.10774194	9.74314397	0.682691
32	0.00949531	8.79957680	0.08355472		32.00000000	1.07312500	9.44304585	0.704076
33	0.01932423	8.79052160	0.16987010		33.00000000	1.04060606	9.14747005	0.725445
34	0.02947320	8.79213430	0.25913231		34.00000000	1.01000000	8.88005564	0.746828
35	0.03926937	8.78659150	0.34504394		35.00000000	0.98114286	8.62090149	0.768312
36	0.04945331	8.79265790	0.43482607		36.00000000	0.95388889	8.38721867	0.789698
37	0.05926438	8.77727600	0.52017979		37.00000000	0.92810811	8.14626102	0.811046
38	0.06942971	8.80063530	0.61102557		38.00000000	0.90368421	7.95299516	0.832431
39	0.07953402	8.78322220	0.69856494		39.00000000	0.88051282	7.73373975	0.853911
40	0.08938229	8.79031850	0.78569881		40.00000000	0.85850000	7.54648843	0.875288
41	0.09948660	8.79251290	0.87473719		41.00000000	0.83756098	7.36426568	0.896662
42	0.10930213	8.79547500	0.96136415		42.00000000	0.81761905	7.19134789	0.918032
43	0.11947341	8.78745270	1.04986694		43.00000000	0.79860465	7.01770060	0.939504
44	0.12929861	8.78767490	1.13623415		44.00000000	0.78045455	6.85838082	0.960892
45	0.13940367	8.78668690	1.22489640		45.00000000	0.76311111	6.70521840	0.982280
46	0.14926757	8.78695870	1.31160797		46.00000000	0.74652174	6.55965569	1.003637
47	0.15941207	8.79113100	1.40141239		47.00000000	0.73063830	6.42313699	1.025114
48	0.16957293	8.77632520	1.48822718		48.00000000	0.71541667	6.27872932	1.046480
49	0.17936614	8.80320170	1.57899631		49.00000000	0.70081633	6.16942748	1.067868
50	0.18950021	8.78643510	1.66503130		50.00000000	0.68680000	6.03452363	1.089345
51	0.19930533	8.79834180	1.75355642		51.00000000	0.67333333	5.92421681	1.110736
52	0.20942973	8.77744290	1.83825750		52.00000000	0.66038462	5.79648825	1.132110
53	0.21926162	8.79667000	1.92877211		53.00000000	0.64792453	5.69957826	1.153487
54	0.22940910	8.78714750	2.01585160		54.00000000	0.63592593	5.58797491	1.174960
55	0.23927151	8.79441830	2.10425375		55.00000000	0.62436364	5.49091499	1.196344
56	0.24941079	8.77813050	2.18936046		56.00000000	0.61321429	5.38287502	1.217694
57	0.25953892	8.78947070	2.28120973		57.00000000	0.60245614	5.29527059	1.239068
58	0.26936188	8.78328700	2.36588270		58.00000000	0.59206897	5.20031165	1.260555
59	0.27949077	8.78538320	2.45543352		59.00000000	0.58203390	5.11339083	1.281935
60	0.28933755	8.78487780	2.54179502		60.00000000	0.57233333	5.02787839	1.303294
61	0.29949543	8.78585910	2.63132465		61.00000000	0.56295082	4.94600658	1.324669
62	0.30933031	8.79131600	2.71942050		62.00000000	0.55387097	4.86925470	1.346140
63	0.31948969	8.78395460	2.80638293		63.00000000	0.54507937	4.78795240	1.367526
64	0.32928810	8.77199750	2.88851439		64.00000000	0.53656250	4.70672491	1.388868
65	0.33944154	8.79758740	2.98626662		65.00000000	0.52830769	4.64783310	1.410247
66	0.34928086	8.77625180	3.06537678		66.00000000	0.52030303	4.56631041	1.431714
67	0.35942313	8.77980610	3.15566539		67.00000000	0.51253731	4.49997823	1.453077
68	0.36956391	8.77859310	3.24425119		68.00000000	0.50500000	4.43318952	1.474429
69	0.37937871	8.78468610	3.33272288		69.00000000	0.49768116	4.37197276	1.495811
70	0.38949567	8.77813530	3.41904569		70.00000000	0.49057143	4.30630237	1.517290
71	0.39934245	8.77566240	3.50449452		71.00000000	0.48366197	4.24445418	1.538664
72	0.40948769	8.77914050	3.59494996		72.00000000	0.47694444	4.18716229	1.560033
73	0.41929129	8.77458100	3.67910539		73.00000000	0.47041096	4.12765906	1.581399
74	0.42945218	8.77245140	3.76734838		74.00000000	0.46405405	4.07089164	1.602872
75	0.43926546	8.76946740	3.85212413		75.00000000	0.45786667	4.01524681	1.624261
76	0.44939655	8.75757030	3.93562188		76.00000000	0.45184211	3.95703900	1.645639
77	0.45956117	8.75004200	4.02117954		77.00000000	0.44597403	3.90229146	1.666992
78	0.46943697	8.74106690	4.10337996		78.00000000	0.44025641	3.84831074	1.688470
79	0.47957477	8.71998600	4.18188528		79.00000000	0.43468354	3.79043442	1.709845
80	0.48939773	8.71261500	4.26393400		80.00000000	0.42925000	3.73988999	1.731265
81	0.49953181	8.67296980	4.33242430		81.00000000	0.42395062	3.67691090	1.752748
82	0.50933987	8.64365480	4.40255801		82.00000000	0.41878049	3.61979397	1.774120
83	0.51946431	8.57945060	4.45671839		83.00000000	0.41373494	3.54961848	1.795490
84	0.52923816	8.51463320	4.50626881		84.00000000	0.40880952	3.48086314	1.816873
85	0.53939903	8.40606400	4.53422277		85.00000000	0.40400000	3.39604986	1.838342
86	0.54952270	8.23293110	4.52418253		86.00000000	0.39930233	3.28742853	1.859735
87	0.55933076	8.02776150	4.49017394		87.00000000	0.39471264	3.16865896	1.881084
88	0.56945217	7.72684240	4.40006717		88.00000000	0.39022727	3.01522464	1.902463
89	0.57928258	7.33572860	4.24945979		89.00000000	0.38584270	2.83043730	1.923942
90	0.58939284	6.78514150	3.99911382		90.00000000	0.38155556	2.58890843	1.945321
91	0.59920096	6.10132030	3.65591698		91.00000000	0.37736264	2.30241032	1.966689
92	0.60929483	5.20283840	3.17006254		92.00000000	0.37326087	1.94201599	1.988166
93	0.61911404	4.13020660	2.55706889		93.00000000	0.36924731	1.52506768	2.009675
94	0.62923175	2.78868840	1.75473128		94.00000000	0.36531915	1.01876127	2.031065
95	0.63932043	1.17919350	0.75388250		95.00000000	0.36147368	0.42624742	2.052420
96	0.64903998	-0.59353679	-0.38522911		96.00000000	0.35770833	-0.21231306	2.073790
97	0.65914500	-2.72915390	-1.79890815		97.00000000	0.35402062	-0.96617675	2.095289
98	0.66888314	-5.05162190	-3.37894472		98.00000000	0.35040816	-1.77012955	2.116674
99	0.67912143	-7.79435210	-5.29331154		99.00000000	0.34686869	-2.70361668	2.138013
100	0.68649870	-9.99473670	-6.86137375		100.00000000	0.34340000	-3.43219258	2.159397
101	0.68644434	-10.00018000	-6.86456696		101.00000000	0.34000000	-3.40006120	2.180878
15:58 02/04/2018
Test Lot:	JK-PERC
Recipe:	Recipe_YJX-LID
Cell Name:	1-2-2h
Test Order:	4
Test Condition:	Light
1	-0.29989946	8.78864860	-2.63571097		1.00000000	34.34000000	301.80219292	0.000000
2	-0.29001456	8.78020480	-2.54638723		2.00000000	17.17000000	150.75611642	0.061731
3	-0.27987516	8.79387760	-2.46118790		3.00000000	11.44666667	100.66058559	0.083250
4	-0.27007067	8.78738210	-2.37321417		4.00000000	8.58500000	75.43967533	0.104648
5	-0.25992307	8.79814340	-2.28684044		5.00000000	6.86800000	60.42564887	0.125993
6	-0.24975312	8.78567310	-2.19424927		6.00000000	5.72333333	50.28333571	0.147417
7	-0.23995310	8.79713340	-2.11089943		7.00000000	4.90571429	43.15622299	0.168917
8	-0.22976306	8.78954700	-2.01951321		8.00000000	4.29250000	37.72913050	0.190295
9	-0.21995187	8.78646470	-1.93259934		9.00000000	3.81555556	33.52524420	0.211649
10	-0.20981915	8.79888920	-1.84617545		10.00000000	3.43400000	30.21538551	0.233032
11	-0.20000052	8.78337670	-1.75667991		11.00000000	3.12181818	27.42010508	0.254507
12	-0.18982463	8.79462340	-1.66943613		12.00000000	2.86166667	25.16728063	0.275882
13	-0.18008043	8.78642270	-1.58226278		13.00000000	2.64153846	23.20967350	0.297249
14	-0.16991347	8.78332040	-1.49240445		14.00000000	2.45285714	21.54423018	0.318638
15	-0.16006804	8.78210830	-1.40573486		15.00000000	2.28933333	20.10517327	0.340164
16	-0.14996435	8.78423120	-1.31732152		16.00000000	2.14625000	18.85315621	0.361551
17	-0.13981153	8.78781410	-1.22863773		17.00000000	2.02000000	17.75138448	0.382914
18	-0.12999214	8.77641300	-1.14086471		18.00000000	1.90777778	16.74344569	0.404290
19	-0.11985422	8.78467560	-1.05288044		19.00000000	1.80736842	15.87714527	0.425780
20	-0.11002591	8.78465560	-0.96653973		20.00000000	1.71700000	15.08325367	0.447152
21	-0.09988351	8.79112910	-0.87808885		21.00000000	1.63523810	14.37558920	0.468544
22	-0.09004553	8.78238870	-0.79081482		22.00000000	1.56090909	13.70851036	0.489884
23	-0.07989494	8.78287320	-0.70170711		23.00000000	1.49304348	13.11321155	0.511353
24	-0.07012245	8.78611560	-0.61610396		24.00000000	1.43083333	12.57146707	0.532740
25	-0.05992721	8.79599190	-0.52711925		25.00000000	1.37360000	12.08217447	0.554115
26	-0.04979002	8.78385260	-0.43734821		26.00000000	1.32076923	11.60144224	0.575593
27	-0.03996990	8.79811290	-0.35165971		27.00000000	1.27185185	11.18989618	0.596993
28	-0.02980592	8.78380110	-0.26180926		28.00000000	1.22642857	10.77270463	0.618340
29	-0.02000217	8.79134560	-0.17584600		29.00000000	1.18413793	10.41016579	0.639717
30	-0.00983447	8.78718850	-0.08641733		30.00000000	1.14466667	10.05840177	0.661210
31	-0.00062168	8.77818010	-0.00545726		31.00000000	1.10774194	9.72395821	0.682707
32	0.00953539	8.78986740	0.08381481		32.00000000	1.07312500	9.43262645	0.704067
33	0.01934853	8.77530960	0.16978938		33.00000000	1.04060606	9.13164035	0.725448
34	0.02950106	8.80025290	0.25961681		34.00000000	1.01000000	8.88825543	0.746928
35	0.03933356	8.77764130	0.34525585		35.00000000	0.98114286	8.61212006	0.768314
36	0.04948906	8.80071830	0.43553929		36.00000000	0.95388889	8.39490740	0.789677
37	0.05929997	8.78906920	0.52119156		37.00000000	0.92810811	8.15720639	0.811057
38	0.06944133	8.77716730	0.60949820		38.00000000	0.90368421	7.93178750	0.832544
39	0.07958568	8.79671960	0.70009290		39.00000000	0.88051282	7.74562439	0.853904
40	0.08940254	8.78802300	0.78567160		40.00000000	0.85850000	7.54451775	0.875244
41	0.09954986	8.78421500	0.87446737		41.00000000	0.83756098	7.35731569	0.896634
42	0.10937715	8.78774740	0.96117877		42.00000000	0.81761905	7.18502966	0.918119
43	0.11953042	8.78024770	1.04950670		43.00000000	0.79860465	7.01194665	0.939488
44	0.12935473	8.79277610	1.13738718		44.00000000	0.78045455	6.86236207	0.960848
45	0.13951470	8.78263090	1.22530612		45.00000000	0.76311111	6.70212322	0.982226
46	0.14931667	8.79350380	1.31301671		46.00000000	0.74652174	6.56454175	1.003703
47	0.15947367	8.79469010	1.40252151		47.00000000	0.73063830	6.42573740	1.025076
48	0.16960461	8.76984880	1.48740679		48.00000000	0.71541667	6.27409600	1.046452
49	0.17944306	8.79319190	1.57787726		49.00000000	0.70081633	6.16241245	1.067823
50	0.18958220	8.78280450	1.66506340		50.00000000	0.68680000	6.03203013	1.089289
51	0.19935068	8.78570180	1.75143563		51.00000000	0.67333333	5.91570588	1.110653
52	0.20949055	8.79423140	1.84230837		52.00000000	0.66038462	5.80757512	1.132041
53	0.21929179	8.78284650	1.92600613		53.00000000	0.64792453	5.69062168	1.153392
54	0.22945251	8.79016780	2.01692607		54.00000000	0.63592593	5.58989560	1.174870
55	0.23927458	8.79256060	2.10383624		55.00000000	0.62436364	5.48975511	1.196270
56	0.24943604	8.78195000	2.19053483		56.00000000	0.61321429	5.38521720	1.217660
57	0.25956848	8.77941510	2.27885943		57.00000000	0.60245614	5.28921254	1.239138
58	0.26936972	8.78316020	2.36591740		58.00000000	0.59206897	5.20023657	1.260543
59	0.27954903	8.78661630	2.45629006		59.00000000	0.58203390	5.11410854	1.281897
60	0.28938153	8.79077530	2.54388801		60.00000000	0.57233333	5.03125373	1.303273
61	0.29953778	8.78363230	2.63102972		61.00000000	0.56295082	4.94475300	1.324760
62	0.30935985	8.78808780	2.71868152		62.00000000	0.55387097	4.86746669	1.346129
63	0.31946698	8.78374770	2.80611735		63.00000000	0.54507937	4.78783962	1.367499
64	0.32929501	8.78838350	2.89397083		64.00000000	0.53656250	4.71551702	1.388881
65	0.33943713	8.77306650	2.97790451		65.00000000	0.52830769	4.63487852	1.410363
66	0.34926143	8.79056840	3.07020649		66.00000000	0.52030303	4.57375938	1.431754
67	0.35944745	8.79100230	3.15990336		67.00000000	0.51253731	4.50571670	1.453094
68	0.36958659	8.77419190	3.24282366		68.00000000	0.50500000	4.43096691	1.474458
69	0.37944141	8.78751950	3.33434879		69.00000000	0.49768116	4.37338289	1.495946
70	0.38956043	8.77339080	3.41776589		70.00000000	0.49057143	4.30397486	1.517325
71	0.39938772	8.78279970	3.50774235		71.00000000	0.48366197	4.24790622	1.538673
72	0.40953651	8.77401640	3.59328006		72.00000000	0.47694444	4.18471838	1.560065
73	0.41934073	8.76580050	3.67585718		73.00000000	0.47041096	4.12352862	1.581543
74	0.42951262	8.76595400	3.76508787		74.00000000	0.46405405	4.06787649	1.602928
75	0.43932351	8.76592250	3.85107584		75.00000000	0.45786667	4.01362372	1.624274
76	0.44947457	8.75030140	3.93303796		76.00000000	0.45184211	3.95375461	1.645658
77	0.45960552	8.75506780	4.02387749		77.00000000	0.44597403	3.90453283	1.667130
78	0.46949384	8.73059750	4.09896175		78.00000000	0.44025641	3.84370151	1.688504
79	0.47961882	8.72835450	4.18628309		79.00000000	0.43468354	3.79407207	1.709861
80	0.48942155	8.69856360	4.25726448		80.00000000	0.42925000	3.73385843	1.731228
81	0.49955919	8.67296120	4.33265747		81.00000000	0.42395062	3.67690725	1.752705
82	0.50936788	8.64285470	4.40239258		82.00000000	0.41878049	3.61945891	1.774086
83	0.51951516	8.57790090	4.45634956		83.00000000	0.41373494	3.54897731	1.795482
84	0.52928144	8.51070210	4.50455666		84.00000000	0.40880952	3.47925607	1.816834
85	0.53940868	8.40462400	4.53352714		85.00000000	0.40400000	3.39546810	1.838297
86	0.54953885	8.23894020	4.52761772		86.00000000	0.39930233	3.28982798	1.859691
87	0.55936617	8.03038310	4.49192464		87.00000000	0.39471264	3.16969374	1.881073
88	0.56948441	7.72386070	4.39861825		88.00000000	0.39022727	3.01406110	1.902600
89	0.57927823	7.33360580	4.24819819		89.00000000	0.38584270	2.82961824	1.923992
90	0.58941066	6.77853730	3.99534214		90.00000000	0.38155556	2.58638857	1.945336
91	0.59918880	6.10101410	3.65565932		91.00000000	0.37736264	2.30229477	1.966719
92	0.60931307	5.19858360	3.16756493		92.00000000	0.37326087	1.94042784	1.988276
93	0.61912847	4.11898900	2.55018336		93.00000000	0.36924731	1.52092562	2.009672
94	0.62919611	2.76890330	1.74218319		94.00000000	0.36531915	1.01153340	2.031044
95	0.63933748	1.18975990	0.76065810		95.00000000	0.36147368	0.43006689	2.052415
96	0.64904571	-0.61823195	-0.40126079		96.00000000	0.35770833	-0.22114672	2.073896
97	0.65917665	-2.73185900	-1.80077766		97.00000000	0.35402062	-0.96713441	2.095285
98	0.66892129	-5.06641820	-3.38903500		98.00000000	0.35040816	-1.77531430	2.116638
99	0.67916983	-7.81371550	-5.30683983		99.00000000	0.34686869	-2.71033324	2.138052
100	0.68645698	-9.99455450	-6.86083170		100.00000000	0.34340000	-3.43213002	2.159561
101	0.68644577	-9.99975300	-6.86428815		101.00000000	0.34000000	-3.39991602	2.180941
