# Supplementary material for: Study on the Electrical Injection Regeneration of Industrialized B-Doped Czochralski Silicon PERC Solar Cells
Source: Hindawi journal article supplement (doi:10.1155/2019/5357370), 2019-06-20
Supplement: f1 [file 5357370.f1.zip › section3.2/IVRawData_1-2-3h.csv]

17:31 02/04/2018
Test Lot:	JK-PERC
Recipe:	Recipe_YJX-LID
Cell Name:	1-2-3h
Test Order:	2
Test Condition:	Light
1	-0.29997921	8.77646640	-2.63275746		1.00000000	34.34000000	301.38385618	0.000000
2	-0.29017866	8.78411010	-2.54896130		2.00000000	17.17000000	150.82317042	0.061742
3	-0.28007296	8.77464100	-2.45753968		3.00000000	11.44666667	100.44039065	0.083188
4	-0.27021137	8.78837780	-2.37471961		4.00000000	8.58500000	75.44822341	0.104697
5	-0.26005504	8.77908710	-2.28304585		5.00000000	6.86800000	60.29477020	0.126089
6	-0.24994785	8.78288560	-2.19526337		6.00000000	5.72333333	50.26738192	0.147446
7	-0.24006319	8.78934380	-2.10999791		7.00000000	4.90571429	43.11800944	0.168822
8	-0.22992474	8.76595780	-2.01551057		8.00000000	4.29250000	37.62787386	0.190317
9	-0.22011079	8.79190250	-1.93519260		9.00000000	3.81555556	33.54599243	0.211689
10	-0.20995224	8.77694030	-1.84273828		10.00000000	3.43400000	30.14001299	0.233083
11	-0.20017773	8.78484440	-1.75853021		11.00000000	3.12181818	27.42468697	0.254436
12	-0.18999387	8.77155490	-1.66654166		12.00000000	2.86166667	25.10126627	0.275910
13	-0.18020968	8.78900810	-1.58386434		13.00000000	2.64153846	23.21650293	0.297298
14	-0.17005783	8.78553870	-1.49404965		14.00000000	2.45285714	21.54967135	0.318684
15	-0.16024090	8.77728750	-1.40648045		15.00000000	2.28933333	20.09413685	0.340162
16	-0.15010467	8.79060550	-1.31951094		16.00000000	2.14625000	18.86683705	0.361553
17	-0.13992231	8.78099440	-1.22865702		17.00000000	2.02000000	17.73760869	0.382910
18	-0.13012101	8.77176190	-1.14139052		18.00000000	1.90777778	16.73457242	0.404288
19	-0.11995129	8.79065420	-1.05445031		19.00000000	1.80736842	15.88795080	0.425774
20	-0.11013213	8.77692890	-0.96662187		20.00000000	1.71700000	15.06998692	0.447155
21	-0.10000856	8.77236940	-0.87731203		21.00000000	1.63523810	14.34491263	0.468518
22	-0.09016037	8.79491810	-0.79295307		22.00000000	1.56090909	13.72806762	0.489897
23	-0.08001373	8.77771190	-0.70233747		23.00000000	1.49304348	13.10550551	0.511385
24	-0.07018861	8.78554060	-0.61664490		24.00000000	1.43083333	12.57064434	0.532769
25	-0.06004569	8.78155330	-0.52729439		25.00000000	1.37360000	12.06234161	0.554118
26	-0.04990277	8.78604980	-0.43844820		26.00000000	1.32076923	11.60434424	0.575506
27	-0.04009551	8.78415680	-0.35220526		27.00000000	1.27185185	11.17214609	0.596992
28	-0.02991612	8.78352450	-0.26276896		28.00000000	1.22642857	10.77236540	0.618381
29	-0.02011110	8.78143500	-0.17660429		29.00000000	1.18413793	10.39843027	0.639719
30	-0.00998083	8.78230090	-0.08765463		30.00000000	1.14466667	10.05280710	0.661093
31	-0.00068861	8.77195260	-0.00604043		31.00000000	1.10774194	9.71705975	0.682689
32	0.00946453	8.78403660	0.08313675		32.00000000	1.07312500	9.42636928	0.704063
33	0.01928118	8.77244950	0.16914315		33.00000000	1.04060606	9.12866412	0.725423
34	0.02940818	8.78126340	0.25824098		34.00000000	1.01000000	8.86907603	0.746791
35	0.03921814	8.76802540	0.34386560		35.00000000	0.98114286	8.60268549	0.768270
36	0.04936523	8.77742770	0.43329974		36.00000000	0.95388889	8.37269076	0.789648
37	0.05918337	8.79057880	0.52025608		37.00000000	0.92810811	8.15860746	0.811006
38	0.06931187	8.76976970	0.60784909		38.00000000	0.90368421	7.92510241	0.832385
39	0.07946864	8.78123280	0.69783261		39.00000000	0.88051282	7.73198806	0.853863
40	0.08929943	8.77970790	0.78402287		40.00000000	0.85850000	7.53737923	0.875242
41	0.09944206	8.77925010	0.87302669		41.00000000	0.83756098	7.35315728	0.896627
42	0.10926020	8.77721120	0.95899985		42.00000000	0.81761905	7.17641506	0.917967
43	0.11940730	8.78621010	1.04913763		43.00000000	0.79860465	7.01670825	0.939440
44	0.12922245	8.77276520	1.13363821		44.00000000	0.78045455	6.84674448	0.960831
45	0.13937774	8.78545380	1.22449670		45.00000000	0.76311111	6.70427741	0.982210
46	0.14920779	8.78088090	1.31017583		46.00000000	0.74652174	6.55511848	1.003684
47	0.15933256	8.78268810	1.39936818		47.00000000	0.73063830	6.41696828	1.025057
48	0.16948710	8.77599620	1.48741815		48.00000000	0.71541667	6.27849395	1.046404
49	0.17932905	8.78406330	1.57523773		49.00000000	0.70081633	6.15601497	1.067791
50	0.18947244	8.77764800	1.66312238		50.00000000	0.68680000	6.02848865	1.089276
51	0.19927941	8.77559090	1.74879458		51.00000000	0.67333333	5.90889787	1.110657
52	0.20940270	8.78536890	1.83967997		52.00000000	0.66038462	5.80172246	1.132027
53	0.21923125	8.76744270	1.92209742		53.00000000	0.64792453	5.68064118	1.153407
54	0.22937612	8.77323060	2.01236959		54.00000000	0.63592593	5.57912479	1.174882
55	0.23919277	8.77607820	2.09917445		55.00000000	0.62436364	5.47946410	1.196257
56	0.24935400	8.77486610	2.18804796		56.00000000	0.61321429	5.38087325	1.217604
57	0.25949290	8.77429580	2.27686746		57.00000000	0.60245614	5.28612838	1.238969
58	0.26932296	8.78432370	2.36582006		58.00000000	0.59206897	5.20092545	1.260464
59	0.27945146	8.78999330	2.45637646		59.00000000	0.58203390	5.11607407	1.281842
60	0.28928894	8.76851080	2.53663319		60.00000000	0.57233333	5.01851101	1.303188
61	0.29944199	8.78117660	2.62945300		61.00000000	0.56295082	4.94337056	1.324577
62	0.30927280	8.77670190	2.71439517		62.00000000	0.55387097	4.86116037	1.346060
63	0.31939459	8.77929020	2.80405779		63.00000000	0.54507937	4.78540993	1.367449
64	0.32921124	8.77621650	2.88922912		64.00000000	0.53656250	4.70898867	1.388809
65	0.33937693	8.77734470	2.97882830		65.00000000	0.52830769	4.63713872	1.410184
66	0.34920326	8.76835730	3.06193895		66.00000000	0.52030303	4.56220287	1.431660
67	0.35931167	8.78165340	3.15535055		67.00000000	0.51253731	4.50092504	1.453037
68	0.36946100	8.76954080	3.24000331		68.00000000	0.50500000	4.42861810	1.474406
69	0.37930742	8.77532860	3.32854725		69.00000000	0.49768116	4.36731571	1.495788
70	0.38944408	8.76747990	3.41444314		70.00000000	0.49057143	4.30107514	1.517275
71	0.39927787	8.76116660	3.49813994		71.00000000	0.48366197	4.23744311	1.538648
72	0.40941676	8.76173210	3.58719997		72.00000000	0.47694444	4.17885945	1.560050
73	0.41925129	8.76518820	3.67481646		73.00000000	0.47041096	4.12324059	1.581406
74	0.42936787	8.74999620	3.75696723		74.00000000	0.46405405	4.06047121	1.602878
75	0.43920758	8.75799370	3.84657722		75.00000000	0.45786667	4.00999338	1.624277
76	0.44936362	8.75792030	3.93549077		76.00000000	0.45184211	3.95719715	1.645660
77	0.45948839	8.73813530	4.01507172		77.00000000	0.44597403	3.89698138	1.667159
78	0.46935043	8.74439430	4.10418522		78.00000000	0.44025641	3.84977564	1.688532
79	0.47948861	8.70717430	4.17499090		79.00000000	0.43468354	3.78486539	1.709874
80	0.48931196	8.69784830	4.25596120		80.00000000	0.42925000	3.73355138	1.731257
81	0.49942705	8.67170330	4.33088320		81.00000000	0.42395062	3.67637397	1.752734
82	0.50925708	8.63270660	4.39626696		82.00000000	0.41878049	3.61520908	1.774115
83	0.51941013	8.57288840	4.45284508		83.00000000	0.41373494	3.54690347	1.795471
84	0.52919036	8.49845600	4.49730099		84.00000000	0.40880952	3.47424975	1.816845
85	0.53930914	8.37871930	4.51871990		85.00000000	0.40400000	3.38500260	1.838327
86	0.54947782	8.23886300	4.52707248		86.00000000	0.39930233	3.28979716	1.859719
87	0.55927140	8.03336050	4.49282877		87.00000000	0.39471264	3.17086896	1.881078
88	0.56938058	7.72340390	4.39755619		88.00000000	0.39022727	3.01388284	1.902449
89	0.57919425	7.33118010	4.24617736		89.00000000	0.38584270	2.82868230	1.923937
90	0.58933985	6.80267620	4.00908817		90.00000000	0.38155556	2.59559890	1.945325
91	0.59910810	6.10225630	3.65591118		91.00000000	0.37736264	2.30276353	1.966679
92	0.60923213	5.20590730	3.17160599		92.00000000	0.37326087	1.94316149	1.988143
93	0.61901826	4.13094380	2.55712964		93.00000000	0.36924731	1.52533989	2.009650
94	0.62913036	2.77595420	1.74643707		94.00000000	0.36531915	1.01410923	2.031040
95	0.63926184	1.17971690	0.75414800		95.00000000	0.36147368	0.42643661	2.052396
96	0.64896983	-0.64398849	-0.41792910		96.00000000	0.35770833	-0.23036005	2.073824
97	0.65908420	-2.76099130	-1.81972574		97.00000000	0.35402062	-0.97744785	2.095325
98	0.66883463	-5.12006660	-3.42447785		98.00000000	0.35040816	-1.79411313	2.116701
99	0.67903006	-7.88226800	-5.35229691		99.00000000	0.34686869	-2.73411195	2.138072
100	0.68604016	-9.99537940	-6.85723168		100.00000000	0.34340000	-3.43241329	2.159445
101	0.68605804	-10.00012600	-6.86066684		101.00000000	0.34000000	-3.40004284	2.180921
17:32 02/04/2018
Test Lot:	JK-PERC
Recipe:	Recipe_YJX-LID
Cell Name:	1-2-3h
Test Order:	3
Test Condition:	Light
1	-0.30002537	8.78239150	-2.63494026		1.00000000	34.34000000	301.58732411	0.000000
2	-0.29016230	8.77479930	-2.54611595		2.00000000	17.17000000	150.66330398	0.021588
3	-0.28004616	8.77825070	-2.45831540		3.00000000	11.44666667	100.48170968	0.043003
4	-0.27020839	8.77615640	-2.37139109		4.00000000	8.58500000	75.34330269	0.064346
5	-0.26011756	8.77895640	-2.28356072		5.00000000	6.86800000	60.29387256	0.085774
6	-0.24995828	8.78593640	-2.19611755		6.00000000	5.72333333	50.28484266	0.107283
7	-0.24010859	8.78349300	-2.10899212		7.00000000	4.90571429	43.08930709	0.128670
8	-0.22990389	8.77013490	-2.01628813		8.00000000	4.29250000	37.64580406	0.150016
9	-0.22008845	8.78544240	-1.93357440		9.00000000	3.81555556	33.52134356	0.171398
10	-0.20995075	8.77492620	-1.84230234		10.00000000	3.43400000	30.13309657	0.192889
11	-0.20012636	8.78955270	-1.75902119		11.00000000	3.12181818	27.43938543	0.214260
12	-0.19001769	8.77027030	-1.66650650		12.00000000	2.86166667	25.09759018	0.235615
13	-0.18022531	8.77907850	-1.58221214		13.00000000	2.64153846	23.19027351	0.256989
14	-0.17005634	8.78436760	-1.49383740		14.00000000	2.45285714	21.54679881	0.278456
15	-0.16024016	8.78586770	-1.40784885		15.00000000	2.28933333	20.11377979	0.299832
16	-0.15010320	8.78429220	-1.31855037		16.00000000	2.14625000	18.85328713	0.321193
17	-0.13992752	8.77823930	-1.22831726		17.00000000	2.02000000	17.73204339	0.342561
18	-0.13011505	8.77910330	-1.14229346		18.00000000	1.90777778	16.74857818	0.364041
19	-0.11997064	8.77282330	-1.05248123		19.00000000	1.80736842	15.85572380	0.385420
20	-0.11014925	8.77584930	-0.96665322		20.00000000	1.71700000	15.06813325	0.406781
21	-0.10001303	8.78435040	-0.87854950		21.00000000	1.63523810	14.36450442	0.428161
22	-0.09017675	8.77180390	-0.79101273		22.00000000	1.56090909	13.69198845	0.449635
23	-0.08005764	8.77539540	-0.70253741		23.00000000	1.49304348	13.10204687	0.471027
24	-0.07023624	8.78861430	-0.61727925		24.00000000	1.43083333	12.57504229	0.492412
25	-0.06010076	8.76521490	-0.52679611		25.00000000	1.37360000	12.03989919	0.513771
26	-0.04992807	8.77566240	-0.43815188		26.00000000	1.32076923	11.59062488	0.535247
27	-0.04012751	8.77808380	-0.35224266		27.00000000	1.27185185	11.16442214	0.556615
28	-0.03000022	8.78151040	-0.26344725		28.00000000	1.22642857	10.76989525	0.578002
29	-0.02013194	8.77483460	-0.17665441		29.00000000	1.18413793	10.39061449	0.599414
30	-0.01003665	8.77028660	-0.08802428		30.00000000	1.14466667	10.03905473	0.620891
31	-0.00072880	8.77321720	-0.00639391		31.00000000	1.10774194	9.71846060	0.642385
32	0.00941541	8.77575110	0.08262726		32.00000000	1.07312500	9.41747790	0.663775
33	0.01922759	8.77483650	0.16871898		33.00000000	1.04060606	9.13114804	0.685258
34	0.02937469	8.77411370	0.25773686		34.00000000	1.01000000	8.86185484	0.706651
35	0.03919357	8.78005500	0.34412174		35.00000000	0.98114286	8.61448825	0.727999
36	0.04933546	8.78411670	0.43336845		36.00000000	0.95388889	8.37907132	0.749373
37	0.05917519	8.76501460	0.51867137		37.00000000	0.92810811	8.13488112	0.770865
38	0.06931856	8.78126620	0.60870475		38.00000000	0.90368421	7.93549161	0.792237
39	0.07948724	8.76976110	0.69708412		39.00000000	0.88051282	7.72188708	0.813584
40	0.08931282	8.79264830	0.78529623		40.00000000	0.85850000	7.54848857	0.834983
41	0.09944355	8.77336600	0.87245463		41.00000000	0.83756098	7.34822899	0.856456
42	0.10928327	8.78084950	0.95959995		42.00000000	0.81761905	7.17938981	0.877841
43	0.11944377	8.77627660	1.04827156		43.00000000	0.79860465	7.00877531	0.899199
44	0.12926340	8.76005840	1.13235493		44.00000000	0.78045455	6.83682740	0.920576
45	0.13941570	8.78331090	1.22453144		45.00000000	0.76311111	6.70264214	0.942049
46	0.14921300	8.77760510	1.30973279		46.00000000	0.74652174	6.55267302	0.963423
47	0.15937945	8.77355480	1.39832434		47.00000000	0.73063830	6.41029515	0.984772
48	0.16951613	8.76881310	1.48645526		48.00000000	0.71541667	6.27335504	1.006147
49	0.17934097	8.76930240	1.57269520		49.00000000	0.70081633	6.14567029	1.027625
50	0.18947244	8.78033540	1.66363157		50.00000000	0.68680000	6.03033435	1.049005
51	0.19926080	8.76769640	1.74705820		51.00000000	0.67333333	5.90358224	1.070374
52	0.20938334	8.76769640	1.83580956		52.00000000	0.66038462	5.79005181	1.091754
53	0.21920967	8.76977440	1.92241935		53.00000000	0.64792453	5.68215194	1.113226
54	0.22935453	8.77082440	2.01162831		54.00000000	0.63592593	5.57759463	1.134624
55	0.23920393	8.77329920	2.09860765		55.00000000	0.62436364	5.47772899	1.156017
56	0.24935251	8.77477260	2.18801157		56.00000000	0.61321429	5.38081591	1.177365
57	0.25947505	8.77339080	2.27647602		57.00000000	0.60245614	5.28558316	1.198852
58	0.26929319	8.77342410	2.36262336		58.00000000	0.59206897	5.19447213	1.220233
59	0.27941796	8.77446750	2.45174381		59.00000000	0.58203390	5.10703752	1.241617
60	0.28926811	8.75287340	2.53192715		60.00000000	0.57233333	5.00956121	1.263023
61	0.29940033	8.78002450	2.62874223		61.00000000	0.56295082	4.94272199	1.284493
62	0.30922961	8.77604960	2.71381440		62.00000000	0.55387097	4.86079908	1.305869
63	0.31940278	8.77076050	2.80140529		63.00000000	0.54507937	4.78076056	1.327256
64	0.32920974	8.77632330	2.88925111		64.00000000	0.53656250	4.70904597	1.348740
65	0.33934197	8.76265810	2.97353766		65.00000000	0.52830769	4.62937968	1.370137
66	0.34917423	8.77228640	3.06305635		66.00000000	0.52030303	4.56424720	1.391484
67	0.35932282	8.77093790	3.15159814		67.00000000	0.51253731	4.49543295	1.412862
68	0.36946917	8.77290730	3.24131878		68.00000000	0.50500000	4.43031819	1.434341
69	0.37932602	8.76515200	3.32485022		69.00000000	0.49768116	4.36225101	1.455716
70	0.38943294	8.76537700	3.41352654		70.00000000	0.49057143	4.30004352	1.477057
71	0.39928681	8.76629450	3.50026577		71.00000000	0.48366197	4.23992328	1.498441
72	0.40941378	8.76783370	3.58967194		72.00000000	0.47694444	4.18176957	1.519925
73	0.41925800	8.75919530	3.67236270		73.00000000	0.47041096	4.12042146	1.541321
74	0.42939690	8.75999450	3.76151448		74.00000000	0.46405405	4.06511096	1.562665
75	0.43921652	8.75505640	3.84536540		75.00000000	0.45786667	4.00864849	1.584039
76	0.44936809	8.74481110	3.92963906		76.00000000	0.45184211	3.95127386	1.605504
77	0.45950326	8.74202920	4.01699092		77.00000000	0.44597403	3.89871796	1.626887
78	0.46934673	8.72519970	4.09514395		78.00000000	0.44025641	3.84132510	1.648230
79	0.47947520	8.71412370	4.17820620		79.00000000	0.43468354	3.78788618	1.669606
80	0.48931271	8.69396970	4.25406987		80.00000000	0.42925000	3.73188649	1.691081
81	0.49946204	8.66862490	4.32964908		81.00000000	0.42395062	3.67506888	1.712472
82	0.50925934	8.62821390	4.39399852		82.00000000	0.41878049	3.61332763	1.733840
83	0.51941389	8.56787680	4.45027422		83.00000000	0.41373494	3.54482999	1.755221
84	0.52916950	8.50395010	4.50003102		84.00000000	0.40880952	3.47649579	1.776699
85	0.53930992	8.39985080	4.53012286		85.00000000	0.40400000	3.39353972	1.798094
86	0.54945105	8.23011110	4.52204319		86.00000000	0.39930233	3.28630250	1.819502
87	0.55926543	8.03612420	4.49432646		87.00000000	0.39471264	3.17195983	1.840864
88	0.56938279	7.72973490	4.40117802		88.00000000	0.39022727	3.01635337	1.862349
89	0.57918531	7.33809190	4.25011503		89.00000000	0.38584270	2.83134917	1.883746
90	0.58926541	6.78724150	3.99948665		90.00000000	0.38155556	2.58970970	1.905128
91	0.59911257	6.10717200	3.65888351		91.00000000	0.37736264	2.30461853	1.926477
92	0.60921502	5.19947390	3.16759760		92.00000000	0.37326087	1.94076015	1.947958
93	0.61902946	4.12052060	2.55072364		93.00000000	0.36924731	1.52149115	1.969347
94	0.62911254	2.76455830	1.73921829		94.00000000	0.36531915	1.00994609	1.990839
95	0.63921201	1.16392170	0.74399273		95.00000000	0.36147368	0.42072707	2.012355
96	0.64894825	-0.65577781	-0.42556586		96.00000000	0.35770833	-0.23457719	2.033748
97	0.65905446	-2.79381590	-1.84127683		97.00000000	0.35402062	-0.98906843	2.055097
98	0.66880113	-5.16986510	-3.45761162		98.00000000	0.35040816	-1.81156293	2.076527
99	0.67901671	-7.95686240	-5.40284253		99.00000000	0.34686869	-2.75998641	2.098027
100	0.68575662	-9.99590400	-6.85475734		100.00000000	0.34340000	-3.43259343	2.119402
101	0.68572313	-10.00025000	-6.85740273		101.00000000	0.34000000	-3.40008500	2.140754
17:32 02/04/2018
Test Lot:	JK-PERC
Recipe:	Recipe_YJX-LID
Cell Name:	1-2-3h
Test Order:	4
Test Condition:	Light
1	-0.29997000	8.79200270	-2.63733705		1.00000000	34.34000000	301.91737272	0.000000
2	-0.29018879	8.77690790	-2.54696028		2.00000000	17.17000000	150.69950864	0.061775
3	-0.28001308	8.77952770	-2.45838259		3.00000000	11.44666667	100.49632707	0.083200
4	-0.27019021	8.77713110	-2.37149490		4.00000000	8.58500000	75.35167049	0.104693
5	-0.26003164	8.77926250	-2.28288603		5.00000000	6.86800000	60.29597485	0.126080
6	-0.24989985	8.77781580	-2.19357485		6.00000000	5.72333333	50.23836576	0.147435
7	-0.24006729	8.78320120	-2.10855931		7.00000000	4.90571429	43.08787560	0.168810
8	-0.22989160	8.76941590	-2.01601505		8.00000000	4.29250000	37.64271775	0.190441
9	-0.22007242	8.78213980	-1.93270676		9.00000000	3.81555556	33.50874230	0.211853
10	-0.20991459	8.77475170	-1.84194841		10.00000000	3.43400000	30.13249734	0.233205
11	-0.20009392	8.77848630	-1.75652174		11.00000000	3.12181818	27.40483814	0.254587
12	-0.18993685	8.77367970	-1.66644509		12.00000000	2.86166667	25.10734674	0.276091
13	-0.18016307	8.77088930	-1.58019034		13.00000000	2.64153846	23.16864143	0.297471
14	-0.17000823	8.76808070	-1.49064588		14.00000000	2.45285714	21.50684937	0.318838
15	-0.16017044	8.77261350	-1.40511336		15.00000000	2.28933333	20.08343651	0.340198
16	-0.15001336	8.76680950	-1.31513855		16.00000000	2.14625000	18.81576489	0.361677
17	-0.13993444	8.78516010	-1.22934646		17.00000000	2.02000000	17.74602340	0.383074
18	-0.13007730	8.76864530	-1.14060171		18.00000000	1.90777778	16.72862664	0.404454
19	-0.11991575	8.78033540	-1.05290050		19.00000000	1.80736842	15.86930093	0.425793
20	-0.11011146	8.77361010	-0.96607502		20.00000000	1.71700000	15.06428854	0.447266
21	-0.09996703	8.78170200	-0.87788069		21.00000000	1.63523810	14.36017365	0.468631
22	-0.09012181	8.77531240	-0.79084700		22.00000000	1.56090909	13.69746490	0.490007
23	-0.07998259	8.77082440	-0.70151329		23.00000000	1.49304348	13.09522217	0.511507
24	-0.07018500	8.77868370	-0.61613190		24.00000000	1.43083333	12.56083326	0.532882
25	-0.06001229	8.77973840	-0.52689219		25.00000000	1.37360000	12.05984867	0.554230
26	-0.04988647	8.78141020	-0.43807355		26.00000000	1.32076923	11.59821639	0.575612
27	-0.04005241	8.77917580	-0.35162711		27.00000000	1.27185185	11.16581100	0.597109
28	-0.02991096	8.76081750	-0.26204444		28.00000000	1.22642857	10.74451689	0.618510
29	-0.02010890	8.76696970	-0.17629409		29.00000000	1.18413793	10.38130136	0.639853
30	-0.00995629	8.79203610	-0.08753602		30.00000000	1.14466667	10.06395066	0.661235
31	-0.00068340	8.76429080	-0.00598954		31.00000000	1.10774194	9.70857245	0.682832
32	0.00946826	8.79066280	0.08323227		32.00000000	1.07312500	9.43348002	0.704213
33	0.01926111	8.76632690	0.16884918		33.00000000	1.04060606	9.12229290	0.725559
34	0.02943799	8.77035240	0.25818157		34.00000000	1.01000000	8.85805592	0.746947
35	0.03924573	8.78052900	0.34459825		35.00000000	0.98114286	8.61495331	0.768428
36	0.04941517	8.77560620	0.43364805		36.00000000	0.95388889	8.37095325	0.789805
37	0.05923779	8.77784920	0.51998038		37.00000000	0.92810811	8.14679301	0.811169
38	0.06938416	8.76974010	0.60848103		38.00000000	0.90368421	7.92507566	0.832539
39	0.07948587	8.77350620	0.69736978		39.00000000	0.88051282	7.72518469	0.854020
40	0.08935240	8.77994350	0.78450901		40.00000000	0.85850000	7.53758149	0.875409
41	0.09949579	8.77596000	0.87317108		41.00000000	0.83756098	7.35040162	0.896762
42	0.10932065	8.77589610	0.95938667		42.00000000	0.81761905	7.17533981	0.918149
43	0.11942533	8.78414250	1.04904912		43.00000000	0.79860465	7.01505706	0.939630
44	0.12928964	8.77524190	1.13454787		44.00000000	0.78045455	6.84867743	0.961007
45	0.13942187	8.77614500	1.22358655		45.00000000	0.76311111	6.69717376	0.982410
46	0.14925714	8.77314090	1.30945392		46.00000000	0.74652174	6.54934040	1.003781
47	0.15941541	8.76967330	1.39802106		47.00000000	0.73063830	6.40745917	1.025262
48	0.16954094	8.78336810	1.48914048		48.00000000	0.71541667	6.28376793	1.046648
49	0.17937323	8.77170370	1.57340883		49.00000000	0.70081633	6.14735316	1.068030
50	0.18952481	8.77115630	1.66235173		50.00000000	0.68680000	6.02403015	1.089390
51	0.19932882	8.77555080	1.74922019		51.00000000	0.67333333	5.90887087	1.110862
52	0.20945659	8.77593330	1.83817706		52.00000000	0.66038462	5.79549134	1.132246
53	0.21929708	8.77515700	1.92436631		53.00000000	0.64792453	5.68563946	1.153622
54	0.22943079	8.76345830	2.01060716		54.00000000	0.63592593	5.57291033	1.175107
55	0.23925342	8.78916930	2.10283881		55.00000000	0.62436364	5.48763770	1.196483
56	0.24939755	8.77010350	2.18724233		56.00000000	0.61321429	5.37795275	1.217844
57	0.25951639	8.76532080	2.27474441		57.00000000	0.60245614	5.28072134	1.239277
58	0.26936877	8.78951930	2.36762200		58.00000000	0.59206897	5.20400160	1.260768
59	0.27949283	8.76063730	2.44853531		59.00000000	0.58203390	5.09898788	1.282164
60	0.28932881	8.77743530	2.53956491		60.00000000	0.57233333	5.02361880	1.303521
61	0.29946923	8.77193450	2.62692447		61.00000000	0.56295082	4.93816772	1.324892
62	0.30929932	8.76967140	2.71245340		62.00000000	0.55387097	4.85726639	1.346387
63	0.31943005	8.77486990	2.80295713		63.00000000	0.54507937	4.78300051	1.367766
64	0.32923853	8.76784900	2.88671372		64.00000000	0.53656250	4.70449898	1.389117
65	0.33940724	8.77114680	2.97699073		65.00000000	0.52830769	4.63386432	1.410490
66	0.34921050	8.76923560	3.06230915		66.00000000	0.52030303	4.56265986	1.431964
67	0.35936654	8.76895240	3.15126808		67.00000000	0.51253731	4.49441530	1.453333
68	0.36951736	8.77186580	3.24135669		68.00000000	0.50500000	4.42979223	1.474690
69	0.37936231	8.76720620	3.32594760		69.00000000	0.49768116	4.36327335	1.496070
70	0.38948414	8.76360130	3.41328372		70.00000000	0.49057143	4.29917241	1.517600
71	0.39931867	8.75568290	3.49630765		71.00000000	0.48366197	4.23479086	1.538976
72	0.40946352	8.76487350	3.58889596		72.00000000	0.47694444	4.18035772	1.560318
73	0.41929582	8.75364970	3.67036873		73.00000000	0.47041096	4.11781275	1.581695
74	0.42945930	8.75193120	3.75859825		74.00000000	0.46405405	4.06136915	1.603177
75	0.43925515	8.75309560	3.84484232		75.00000000	0.45786667	4.00775071	1.624558
76	0.44941267	8.73913100	3.92747620		76.00000000	0.45184211	3.94870735	1.645926
77	0.45954490	8.73932550	4.01611246		77.00000000	0.44597403	3.89751218	1.667291
78	0.46942037	8.72377680	4.09511853		78.00000000	0.44025641	3.84069866	1.688769
79	0.47954962	8.70955750	4.17666499		79.00000000	0.43468354	3.78590132	1.710164
80	0.48936555	8.68901540	4.25210480		80.00000000	0.42925000	3.72975986	1.731540
81	0.49948809	8.66081620	4.32597454		81.00000000	0.42395062	3.67175837	1.752890
82	0.50931817	8.62437920	4.39255303		82.00000000	0.41878049	3.61172173	1.774362
83	0.51947045	8.57021050	4.45197111		83.00000000	0.41373494	3.54579552	1.795735
84	0.52922088	8.49416070	4.49528720		84.00000000	0.40880952	3.47249379	1.817123
85	0.53936654	8.38237860	4.52117454		85.00000000	0.40400000	3.38648095	1.838613
86	0.54952407	8.23721310	4.52654687		86.00000000	0.39930233	3.28913835	1.859987
87	0.55932581	8.01512050	4.48306377		87.00000000	0.39471264	3.16366940	1.881352
88	0.56945807	7.72341350	4.39816015		88.00000000	0.39022727	3.01388659	1.902725
89	0.57924718	7.32751990	4.24444524		89.00000000	0.38584270	2.82727004	1.924208
90	0.58934075	6.78018280	3.99583802		90.00000000	0.38155556	2.58701642	1.945594
91	0.59915888	6.10897590	3.66024716		91.00000000	0.37736264	2.30529926	1.966938
92	0.60926878	5.20106120	3.16884421		92.00000000	0.37326087	1.94135263	1.988418
93	0.61907059	4.11057280	2.54473473		93.00000000	0.36924731	1.51781796	2.009949
94	0.62916410	2.76149890	1.73743597		94.00000000	0.36531915	1.00882843	2.031335
95	0.63923901	1.13387890	0.72481963		95.00000000	0.36147368	0.40986738	2.052676
96	0.64901698	-0.66548270	-0.43190957		96.00000000	0.35770833	-0.23804871	2.074055
97	0.65912759	-2.83067080	-1.86577322		97.00000000	0.35402062	-1.00211583	2.095538
98	0.66888624	-5.21017600	-3.48501503		98.00000000	0.35040816	-1.82568820	2.116964
99	0.67908990	-8.02497390	-5.44967872		99.00000000	0.34686869	-2.78361216	2.138314
100	0.68554705	-9.99616050	-6.85283834		100.00000000	0.34340000	-3.43268152	2.159689
101	0.68555969	-9.99995040	-6.85556290		101.00000000	0.34000000	-3.39998314	2.181197
