# Supplementary material for: Study on the Electrical Injection Regeneration of Industrialized B-Doped Czochralski Silicon PERC Solar Cells
Source: Hindawi journal article supplement (doi:10.1155/2019/5357370), 2019-06-20
Supplement: f1 [file 5357370.f1.zip › section3.2/IVRawData_1-2-4h.csv]

18:49 02/04/2018
Test Lot:	JK-PERC
Recipe:	Recipe_YJX-LID
Cell Name:	1-2-4h
Test Order:	2
Test Condition:	Light
1	-0.29991895	8.80373860	-2.64040804		1.00000000	34.34000000	302.32038352	0.000000
2	-0.29011220	8.80783270	-2.55525972		2.00000000	17.17000000	151.23048746	0.061723
3	-0.27997428	8.79524230	-2.46244163		3.00000000	11.44666667	100.67620686	0.083240
4	-0.27012140	8.80217170	-2.37765494		4.00000000	8.58500000	75.56664404	0.104634
5	-0.25995815	8.80510040	-2.28895761		5.00000000	6.86800000	60.47342955	0.125985
6	-0.24983585	8.78893090	-2.19579002		6.00000000	5.72333333	50.30198118	0.147351
7	-0.23998968	8.79486370	-2.11067653		7.00000000	4.90571429	43.14508849	0.168847
8	-0.22984579	8.79570960	-2.02165682		8.00000000	4.29250000	37.75558346	0.190278
9	-0.22002193	8.79458810	-1.93500225		9.00000000	3.81555556	33.55623948	0.211650
10	-0.20985349	8.79979990	-1.84666872		10.00000000	3.43400000	30.21851286	0.233020
11	-0.20008397	8.80504700	-1.76174876		11.00000000	3.12181818	27.48775582	0.254492
12	-0.18990584	8.79284950	-1.66981347		12.00000000	2.86166667	25.16220432	0.275870
13	-0.18011698	8.80054280	-1.58512719		13.00000000	2.64153846	23.24697229	0.297219
14	-0.16999243	8.80707840	-1.49713666		14.00000000	2.45285714	21.60250516	0.318586
15	-0.16014552	8.80072310	-1.40939638		15.00000000	2.28933333	20.14778875	0.340067
16	-0.14997260	8.79273610	-1.31866949		16.00000000	2.14625000	18.87140985	0.361435
17	-0.13985252	8.78592490	-1.22873374		17.00000000	2.02000000	17.74756830	0.382784
18	-0.13003388	8.80323120	-1.14471831		18.00000000	1.90777778	16.79460886	0.404158
19	-0.11990339	8.80628200	-1.05590307		19.00000000	1.80736842	15.91619599	0.425647
20	-0.11005796	8.78783420	-0.96717110		20.00000000	1.71700000	15.08871132	0.447028
21	-0.09992598	8.80784610	-0.88013265		21.00000000	1.63523810	14.40292548	0.468391
22	-0.09012669	8.79378700	-0.79255494		22.00000000	1.56090909	13.72630207	0.489755
23	-0.07997461	8.79437640	-0.70332686		23.00000000	1.49304348	13.13038633	0.511232
24	-0.07014184	8.79522420	-0.61691318		24.00000000	1.43083333	12.58449996	0.532617
25	-0.06003144	8.79649930	-0.52806652		25.00000000	1.37360000	12.08287144	0.553970
26	-0.04984959	8.78876020	-0.43811608		26.00000000	1.32076923	11.60792405	0.575344
27	-0.04000565	8.79542450	-0.35186665		27.00000000	1.27185185	11.18647694	0.596834
28	-0.02986473	8.79983520	-0.26280472		28.00000000	1.22642857	10.79236931	0.618199
29	-0.02005875	8.79700280	-0.17645685		29.00000000	1.18413793	10.41686469	0.639582
30	-0.00990741	8.80316830	-0.08721663		30.00000000	1.14466667	10.07669331	0.660937
31	-0.00066634	8.77222350	-0.00584531		31.00000000	1.10774194	9.71735984	0.682516
32	0.00946097	8.80905440	0.08334217		32.00000000	1.07312500	9.45321650	0.703908
33	0.01930909	8.79228690	0.16977109		33.00000000	1.04060606	9.14930703	0.725293
34	0.02945046	8.80037120	0.25917501		34.00000000	1.01000000	8.88837491	0.746771
35	0.03927627	8.79792120	0.34554948		35.00000000	0.98114286	8.63201754	0.768171
36	0.04937670	8.79846670	0.43443922		36.00000000	0.95388889	8.39275962	0.789525
37	0.05924418	8.80129050	0.52142522		37.00000000	0.92810811	8.16854907	0.810909
38	0.06939597	8.79466340	0.61031417		38.00000000	0.90368421	7.94759845	0.832392
39	0.07954701	8.80309100	0.70025957		39.00000000	0.88051282	7.75123449	0.853757
40	0.08936314	8.80799770	0.78711029		40.00000000	0.85850000	7.56166603	0.875117
41	0.09952162	8.78731820	0.87452816		41.00000000	0.83756098	7.35991480	0.896490
42	0.10931840	8.80773540	0.96284754		42.00000000	0.81761905	7.20137223	0.917971
43	0.11947539	8.78252220	1.04929527		43.00000000	0.79860465	7.01376308	0.939364
44	0.12928705	8.79887870	1.13758107		44.00000000	0.78045455	6.86712488	0.960702
45	0.13943660	8.80611990	1.22789542		45.00000000	0.76311111	6.72004794	0.982081
46	0.14927581	8.78519440	1.31141701		46.00000000	0.74652174	6.55833860	1.003562
47	0.15940824	8.79751010	1.40239560		47.00000000	0.73063830	6.42779780	1.024937
48	0.16956897	8.79084970	1.49065533		48.00000000	0.71541667	6.28912039	1.046287
49	0.17938435	8.79957960	1.57850687		49.00000000	0.70081633	6.16688905	1.067665
50	0.18952869	8.80495170	1.66879096		50.00000000	0.68680000	6.04724083	1.089152
51	0.19926964	8.78420260	1.75042489		51.00000000	0.67333333	5.91469642	1.110533
52	0.20944971	8.79276080	1.84164120		52.00000000	0.66038462	5.80660396	1.131885
53	0.21927403	8.80061630	1.92974660		53.00000000	0.64792453	5.70213516	1.153247
54	0.22939530	8.79177090	2.01679092		54.00000000	0.63592593	5.59091505	1.174717
55	0.23921441	8.80367370	2.10596561		55.00000000	0.62436364	5.49669372	1.196094
56	0.24937661	8.79651260	2.19364449		56.00000000	0.61321429	5.39414719	1.217455
57	0.25954551	8.79671960	2.28314907		57.00000000	0.60245614	5.29963774	1.238818
58	0.26934305	8.78864190	2.36715961		58.00000000	0.59206897	5.20348212	1.260290
59	0.27949110	8.80075840	2.45973365		59.00000000	0.58203390	5.12233972	1.281668
60	0.28930202	8.79195980	2.54353173		60.00000000	0.57233333	5.03193166	1.303054
61	0.29945529	8.79766370	2.63450693		61.00000000	0.56295082	4.95265199	1.324401
62	0.30927739	8.79952620	2.72149450		62.00000000	0.55387097	4.87380209	1.345877
63	0.31941429	8.78110030	2.80480892		63.00000000	0.54507937	4.78639658	1.367263
64	0.32923487	8.78985690	2.89392739		64.00000000	0.53656250	4.71630759	1.388653
65	0.33938888	8.79898550	2.98627783		65.00000000	0.52830769	4.64857172	1.410135
66	0.34920651	8.78778080	3.06875026		66.00000000	0.52030303	4.57230898	1.431512
67	0.35936797	8.79651550	3.16118592		67.00000000	0.51253731	4.50854242	1.452861
68	0.36951232	8.77464870	3.24234080		68.00000000	0.50500000	4.43119759	1.474239
69	0.37933886	8.78969000	3.33427098		69.00000000	0.49768116	4.37446311	1.495712
70	0.38948619	8.79112720	3.42402264		70.00000000	0.49057143	4.31267583	1.517080
71	0.39931867	8.78125860	3.50652051		71.00000000	0.48366197	4.24716085	1.538439
72	0.40945929	8.79133220	3.59969264		72.00000000	0.47694444	4.19297705	1.559815
73	0.41927916	8.76532270	3.67511714		73.00000000	0.47041096	4.12330386	1.581285
74	0.42946145	8.78467180	3.77267789		74.00000000	0.46405405	4.07656256	1.602665
75	0.43924931	8.77852820	3.85596245		75.00000000	0.45786667	4.01939545	1.624006
76	0.44942713	8.76328660	3.93845875		76.00000000	0.45184211	3.95962187	1.645371
77	0.45955214	8.75270270	4.02232326		77.00000000	0.44597403	3.90347806	1.666890
78	0.46941069	8.75224210	4.10839600		78.00000000	0.44025641	3.85323069	1.688276
79	0.47953865	8.72589020	4.18440161		79.00000000	0.43468354	3.79300088	1.709621
80	0.48933840	8.71281150	4.26351324		80.00000000	0.42925000	3.73997434	1.731000
81	0.49948201	8.67966750	4.33533777		81.00000000	0.42395062	3.67975039	1.752471
82	0.50930184	8.63002590	4.39528807		82.00000000	0.41878049	3.61408646	1.773858
83	0.51946479	8.59243970	4.46346988		83.00000000	0.41373494	3.55499252	1.795217
84	0.52923179	8.51340580	4.50556499		84.00000000	0.40880952	3.48036137	1.816591
85	0.53936201	8.39513210	4.52801532		85.00000000	0.40400000	3.39163337	1.838065
86	0.54951382	8.22787000	4.52132827		86.00000000	0.39930233	3.28540763	1.859437
87	0.55928677	8.01694580	4.48377172		87.00000000	0.39471264	3.16438987	1.880802
88	0.56943929	7.70879220	4.38968916		88.00000000	0.39022727	3.00818096	1.902169
89	0.57922488	7.29170940	4.22353950		89.00000000	0.38584270	2.81345282	1.923652
90	0.58934098	6.74654580	3.97601591		90.00000000	0.38155556	2.57418203	1.945035
91	0.59914070	6.02915190	3.61231029		91.00000000	0.37736264	2.27517666	1.966431
92	0.60927689	5.13404560	3.12805534		92.00000000	0.37326087	1.91633833	1.987895
93	0.61905432	4.00332500	2.47827564		93.00000000	0.36924731	1.47821699	2.009387
94	0.62917632	2.64624500	1.66495469		94.00000000	0.36531915	0.96672397	2.030777
95	0.63922465	0.99133700	0.63368705		95.00000000	0.36147368	0.35834224	2.052160
96	0.64901322	-0.82883024	-0.53792178		96.00000000	0.35770833	-0.29647948	2.073637
97	0.65908837	-2.99140950	-1.97160321		97.00000000	0.35402062	-1.05902064	2.095015
98	0.66883081	-5.40140530	-3.61262628		98.00000000	0.35040816	-1.89269651	2.116359
99	0.67908454	-8.20058350	-5.56888947		99.00000000	0.34686869	-2.84452563	2.137734
100	0.68498212	-9.99728300	-6.84796010		100.00000000	0.34340000	-3.43306698	2.159212
101	0.68491292	-10.00020700	-6.84927098		101.00000000	0.34000000	-3.40007038	2.180644
18:50 02/04/2018
Test Lot:	JK-PERC
Recipe:	Recipe_YJX-LID
Cell Name:	1-2-4h
Test Order:	3
Test Condition:	Light
1	-0.29993573	8.80321880	-2.64039986		1.00000000	34.34000000	302.30253359	0.000000
2	-0.29009536	8.79600140	-2.55167919		2.00000000	17.17000000	151.02734404	0.061729
3	-0.27995577	8.80181220	-2.46411811		3.00000000	11.44666667	100.75141032	0.083239
4	-0.27013251	8.79142670	-2.37485016		4.00000000	8.58500000	75.47439822	0.104671
5	-0.25998324	8.80721090	-2.28972723		5.00000000	6.86800000	60.48792446	0.126049
6	-0.24983397	8.78640560	-2.19514259		6.00000000	5.72333333	50.28752805	0.147431
7	-0.24001592	8.81787870	-2.11643127		7.00000000	4.90571429	43.25799351	0.168922
8	-0.22984879	8.77860830	-2.01775250		8.00000000	4.29250000	37.68217613	0.190403
9	-0.22004786	8.81406690	-1.93951656		9.00000000	3.81555556	33.63056193	0.211770
10	-0.20992018	8.78915690	-1.84502140		10.00000000	3.43400000	30.18196479	0.233155
11	-0.20011553	8.80823710	-1.76266504		11.00000000	3.12181818	27.49771473	0.254499
12	-0.18996105	8.78814410	-1.66940508		12.00000000	2.86166667	25.14873903	0.275984
13	-0.18016012	8.80156330	-1.58569070		13.00000000	2.64153846	23.24966798	0.297373
14	-0.16998108	8.78920360	-1.49399832		14.00000000	2.45285714	21.55866083	0.318734
15	-0.16017345	8.80516150	-1.41035310		15.00000000	2.28933333	20.15794973	0.340095
16	-0.15005916	8.79839420	-1.32027964		16.00000000	2.14625000	18.88355355	0.361563
17	-0.13989426	8.80391030	-1.23161652		17.00000000	2.02000000	17.78389881	0.382931
18	-0.13007101	8.78921030	-1.14322146		18.00000000	1.90777778	16.76786009	0.404312
19	-0.11996938	8.81076050	-1.05702147		19.00000000	1.80736842	15.92429029	0.425676
20	-0.11011634	8.79638000	-0.96862517		20.00000000	1.71700000	15.10338446	0.447153
21	-0.09992837	8.79634670	-0.87900461		21.00000000	1.63523810	14.38412122	0.468529
22	-0.09010288	8.79812910	-0.79273678		22.00000000	1.56090909	13.73307970	0.489919
23	-0.07996851	8.79814720	-0.70357468		23.00000000	1.49304348	13.13601630	0.511404
24	-0.07016013	8.80426410	-0.61770830		24.00000000	1.43083333	12.59743455	0.532786
25	-0.06004733	8.80003640	-0.52841871		25.00000000	1.37360000	12.08773000	0.554130
26	-0.04985192	8.79850770	-0.43862250		26.00000000	1.32076923	11.62079825	0.575501
27	-0.04000484	8.79270170	-0.35175061		27.00000000	1.27185185	11.18301394	0.596980
28	-0.02987939	8.80103780	-0.26296967		28.00000000	1.22642857	10.79384422	0.618355
29	-0.02007027	8.78459260	-0.17630916		29.00000000	1.18413793	10.40216931	0.639686
30	-0.00989272	8.79943940	-0.08705042		30.00000000	1.14466667	10.07242497	0.661070
31	-0.00066490	8.78521730	-0.00584130		31.00000000	1.10774194	9.73175362	0.682665
32	0.00951095	8.79518510	0.08365057		32.00000000	1.07312500	9.43833301	0.704037
33	0.01930863	8.79207420	0.16976288		33.00000000	1.04060606	9.14908570	0.725392
34	0.02947472	8.78955750	0.25906975		34.00000000	1.01000000	8.87745308	0.746763
35	0.03928431	8.80852130	0.34603666		35.00000000	0.98114286	8.64241776	0.768241
36	0.04941393	8.77954960	0.43383206		36.00000000	0.95388889	8.37471481	0.789631
37	0.05921384	8.80790040	0.52154960		37.00000000	0.92810811	8.17468378	0.810981
38	0.06939482	8.79068760	0.61002817		38.00000000	0.90368421	7.94400558	0.832358
39	0.07954305	8.79372500	0.69947974		39.00000000	0.88051282	7.74298760	0.853837
40	0.08936305	8.79380510	0.78584127		40.00000000	0.85850000	7.54948168	0.875209
41	0.09949194	8.79434870	0.87496680		41.00000000	0.83756098	7.36580328	0.896566
42	0.10931268	8.79172420	0.96104693		42.00000000	0.81761905	7.18828117	0.917951
43	0.11944900	8.78085610	1.04886448		43.00000000	0.79860465	7.01243252	0.939440
44	0.12928762	8.80649660	1.13857099		44.00000000	0.78045455	6.87307030	0.960839
45	0.13943511	8.78871150	1.22545495		45.00000000	0.76311111	6.70676340	0.982199
46	0.14924321	8.79385660	1.31242339		46.00000000	0.74652174	6.56480512	1.003562
47	0.15940185	8.78477480	1.40030935		47.00000000	0.73063830	6.41849291	1.025038
48	0.16954413	8.79573920	1.49126595		48.00000000	0.71541667	6.29261842	1.046413
49	0.17935595	8.79081250	1.57668453		49.00000000	0.70081633	6.16074492	1.067791
50	0.18952055	8.79501340	1.66683578		50.00000000	0.68680000	6.04041520	1.089157
51	0.19928622	8.80080890	1.75387994		51.00000000	0.67333333	5.92587799	1.110638
52	0.20943817	8.79901500	1.84284960		52.00000000	0.66038462	5.81073414	1.132058
53	0.21924850	8.79393200	1.92805640		53.00000000	0.64792453	5.69780424	1.153460
54	0.22937217	8.79248810	2.01675208		54.00000000	0.63592593	5.59137114	1.174948
55	0.23923759	8.79131510	2.10321304		55.00000000	0.62436364	5.48897746	1.196341
56	0.24935605	8.78639030	2.19093958		56.00000000	0.61321429	5.38794005	1.217694
57	0.25950801	8.80079940	2.28387794		57.00000000	0.60245614	5.30209564	1.239071
58	0.26936150	8.79300590	2.36849726		58.00000000	0.59206897	5.20606591	1.260562
59	0.27950153	8.79739000	2.45888397		59.00000000	0.58203390	5.12037920	1.281947
60	0.28933793	8.79367350	2.54434329		60.00000000	0.57233333	5.03291247	1.303299
61	0.29947573	8.78555110	2.63105933		61.00000000	0.56295082	4.94583319	1.324676
62	0.30930316	8.80504320	2.72342769		62.00000000	0.55387097	4.87685780	1.346155
63	0.31943205	8.78607180	2.80655293		63.00000000	0.54507937	4.78910644	1.367529
64	0.32926175	8.79945950	2.89732543		64.00000000	0.53656250	4.72145999	1.388894
65	0.33940551	8.76851370	2.97608186		65.00000000	0.52830769	4.63247324	1.410273
66	0.34924784	8.78980160	3.06981922		66.00000000	0.52030303	4.57336041	1.431736
67	0.35938191	8.78491310	3.15713885		67.00000000	0.51253731	4.50259576	1.453115
68	0.36954430	8.79111290	3.24870566		68.00000000	0.50500000	4.43951201	1.474469
69	0.37935165	8.78904060	3.33413705		69.00000000	0.49768116	4.37413992	1.495858
70	0.38949469	8.78217790	3.42061166		70.00000000	0.49057143	4.30828556	1.517329
71	0.39933774	8.79196930	3.51096515		71.00000000	0.48366197	4.25234121	1.538707
72	0.40947855	8.77691080	3.59395671		72.00000000	0.47694444	4.18609885	1.560070
73	0.41928962	8.78167250	3.68206413		73.00000000	0.47041096	4.13099498	1.581449
74	0.42942074	8.77645870	3.76879339		74.00000000	0.46405405	4.07275124	1.602915
75	0.43924519	8.76899720	3.85173984		75.00000000	0.45786667	4.01503152	1.624302
76	0.44939268	8.76720330	3.93991699		76.00000000	0.45184211	3.96139160	1.645661
77	0.45954612	8.75008770	4.02106885		77.00000000	0.44597403	3.90231184	1.667027
78	0.46940780	8.74246220	4.10377995		78.00000000	0.44025641	3.84892502	1.688512
79	0.47951511	8.72485450	4.18369957		79.00000000	0.43468354	3.79255068	1.709882
80	0.48934552	8.70940590	4.26190876		80.00000000	0.42925000	3.73851248	1.731262
81	0.49949598	8.67658710	4.33392038		81.00000000	0.42395062	3.67844446	1.752607
82	0.50929964	8.65122700	4.40606680		82.00000000	0.41878049	3.62296506	1.774089
83	0.51943296	8.58664230	4.46018503		83.00000000	0.41373494	3.55259393	1.795481
84	0.52920759	8.50136180	4.49898519		84.00000000	0.40880952	3.47543767	1.816859
85	0.53935879	8.41366290	4.53798304		85.00000000	0.40400000	3.39911981	1.838340
86	0.54948765	8.22485260	4.51945493		86.00000000	0.39930233	3.28420277	1.859722
87	0.55930096	8.04108240	4.49738511		87.00000000	0.39471264	3.17391689	1.881110
88	0.56943285	7.71218730	4.39157279		88.00000000	0.39022727	3.00950582	1.902491
89	0.57924020	7.32867340	4.24506225		89.00000000	0.38584270	2.82771511	1.923977
90	0.58934671	6.76714420	3.98819417		90.00000000	0.38155556	2.58204146	1.945368
91	0.59914291	6.07342620	3.63885025		91.00000000	0.37736264	2.29188413	1.966711
92	0.60927182	5.15836570	3.14284686		92.00000000	0.37326087	1.92541607	1.988188
93	0.61904567	4.05174780	2.50821693		93.00000000	0.36924731	1.49609698	2.009691
94	0.62919760	2.66385630	1.67609199		94.00000000	0.36531915	0.97315772	2.031136
95	0.63926101	1.00596830	0.64307631		95.00000000	0.36147368	0.36363107	2.052489
96	0.64902145	-0.83569872	-0.54238640		96.00000000	0.35770833	-0.29893640	2.073866
97	0.65910941	-3.04970460	-2.01008900		97.00000000	0.35402062	-1.07965831	2.095345
98	0.66888326	-5.49319980	-3.67430939		98.00000000	0.35040816	-1.92486205	2.116719
99	0.67911857	-8.37180330	-5.68544709		99.00000000	0.34686869	-2.90391642	2.138064
100	0.68429655	-9.99851510	-6.84194939		100.00000000	0.34340000	-3.43349009	2.159450
101	0.68429059	-10.00004000	-6.84293327		101.00000000	0.34000000	-3.40001360	2.180957
18:50 02/04/2018
Test Lot:	JK-PERC
Recipe:	Recipe_YJX-LID
Cell Name:	1-2-4h
Test Order:	4
Test Condition:	Light
1	-0.29991823	8.79042050	-2.63640736		1.00000000	34.34000000	301.86303997	0.000000
2	-0.29012471	8.79871940	-2.55272591		2.00000000	17.17000000	151.07401210	0.061783
3	-0.27999184	8.79920860	-2.46370661		3.00000000	11.44666667	100.72160777	0.083202
4	-0.27017227	8.79516320	-2.37620921		4.00000000	8.58500000	75.50647607	0.104691
5	-0.25998726	8.79539200	-2.28668987		5.00000000	6.86800000	60.40675226	0.126124
6	-0.24984618	8.80247590	-2.19926498		6.00000000	5.72333333	50.37950373	0.147473
7	-0.24002886	8.79826740	-2.11183809		7.00000000	4.90571429	43.16178607	0.168850
8	-0.22986023	8.79158210	-2.02083508		8.00000000	4.29250000	37.73786616	0.190340
9	-0.22001091	8.79757310	-1.93556206		9.00000000	3.81555556	33.56762892	0.211723
10	-0.20989586	8.79427050	-1.84588097		10.00000000	3.43400000	30.19952490	0.233078
11	-0.20009343	8.79395960	-1.75961354		11.00000000	3.12181818	27.45314297	0.254453
12	-0.18994936	8.79345230	-1.67031064		12.00000000	2.86166667	25.16392933	0.275936
13	-0.18015364	8.79308030	-1.58410542		13.00000000	2.64153846	23.22725981	0.297304
14	-0.17001106	8.79907130	-1.49593944		14.00000000	2.45285714	21.58286489	0.318665
15	-0.16018629	8.79818530	-1.40934866		15.00000000	2.28933333	20.14197888	0.340048
16	-0.15006232	8.78912540	-1.31891655		16.00000000	2.14625000	18.86366039	0.361523
17	-0.13992347	8.80432700	-1.23193198		17.00000000	2.02000000	17.78474054	0.382890
18	-0.13010243	8.78733630	-1.14325381		18.00000000	1.90777778	16.76428492	0.404235
19	-0.11994272	8.78970620	-1.05426127		19.00000000	1.80736842	15.88623742	0.425609
20	-0.11013285	8.79698090	-0.96883658		20.00000000	1.71700000	15.10441621	0.447080
21	-0.09996422	8.79232310	-0.87891776		21.00000000	1.63523810	14.37754168	0.468466
22	-0.09013797	8.78474140	-0.79183878		22.00000000	1.56090909	13.71218271	0.489859
23	-0.08000284	8.80616280	-0.70451801		23.00000000	1.49304348	13.14798394	0.511205
24	-0.07018775	8.79761790	-0.61748498		24.00000000	1.43083333	12.58792495	0.532681
25	-0.06002061	8.79582880	-0.52793102		25.00000000	1.37360000	12.08195044	0.554057
26	-0.04989217	8.79737760	-0.43892028		26.00000000	1.32076923	11.61930565	0.575438
27	-0.04005327	8.80243110	-0.35256612		27.00000000	1.27185185	11.19538830	0.596895
28	-0.02991367	8.79204750	-0.26300239		28.00000000	1.22642857	10.78281826	0.618363
29	-0.02007997	8.79757790	-0.17665514		29.00000000	1.18413793	10.41754569	0.639730
30	-0.00992474	8.78976250	-0.08723613		30.00000000	1.14466667	10.06134814	0.661107
31	-0.00069319	8.80710220	-0.00610498		31.00000000	1.10774194	9.75599644	0.682560
32	0.00945142	8.78362270	0.08301767		32.00000000	1.07312500	9.42592511	0.704073
33	0.01928632	8.78880790	0.16950374		33.00000000	1.04060606	9.14568677	0.725470
34	0.02941744	8.80099580	0.25890280		34.00000000	1.01000000	8.88900576	0.746871
35	0.03924639	8.78512000	0.34478426		35.00000000	0.98114286	8.61945774	0.768225
36	0.04940803	8.79129120	0.43436038		36.00000000	0.95388889	8.38591499	0.789679
37	0.05921837	8.80692010	0.52153148		37.00000000	0.92810811	8.17377395	0.811056
38	0.06936662	8.79339220	0.60996789		38.00000000	0.90368421	7.94644969	0.832430
39	0.07952379	8.79380800	0.69931691		39.00000000	0.88051282	7.74306069	0.853797
40	0.08933488	8.78639320	0.78493134		40.00000000	0.85850000	7.54311856	0.875286
41	0.09945931	8.79304410	0.87455006		41.00000000	0.83756098	7.36471059	0.896660
42	0.10932025	8.80227760	0.96226719		42.00000000	0.81761905	7.19690983	0.918055
43	0.11942682	8.78000640	1.04856824		43.00000000	0.79860465	7.01175395	0.939534
44	0.12925874	8.79972930	1.13744192		44.00000000	0.78045455	6.86778873	0.960905
45	0.13940772	8.79495810	1.22608506		45.00000000	0.76311111	6.71153025	0.982271
46	0.14923072	8.79811380	1.31294886		46.00000000	0.74652174	6.56798322	1.003643
47	0.15936929	8.80521300	1.40328054		47.00000000	0.73063830	6.43342584	1.025125
48	0.16951010	8.79553510	1.49093203		48.00000000	0.71541667	6.29247240	1.046505
49	0.17934351	8.80219270	1.57861613		49.00000000	0.70081633	6.16872035	1.067841
50	0.18948653	8.78979970	1.66554864		50.00000000	0.68680000	6.03683443	1.089218
51	0.19926338	8.79546360	1.75261381		51.00000000	0.67333333	5.92227882	1.110701
52	0.20939451	8.78781510	1.84012024		52.00000000	0.66038462	5.80333789	1.132072
53	0.21920633	8.78806880	1.92640031		53.00000000	0.64792453	5.69400533	1.153433
54	0.22937170	8.79591080	2.01753301		54.00000000	0.63592593	5.59354772	1.174809
55	0.23921107	8.79312520	2.10341289		55.00000000	0.62436364	5.49010762	1.196284
56	0.24934666	8.78463460	2.19041930		56.00000000	0.61321429	5.38686343	1.217681
57	0.25951946	8.80699350	2.28558620		57.00000000	0.60245614	5.30582731	1.239026
58	0.26933798	8.78321740	2.36565403		58.00000000	0.59206897	5.20027044	1.260393
59	0.27948251	8.79230790	2.45729628		59.00000000	0.58203390	5.11742124	1.281885
60	0.28933379	8.79291530	2.54408751		60.00000000	0.57233333	5.03247852	1.303259
61	0.29947087	8.79069420	2.63255684		61.00000000	0.56295082	4.94872851	1.324611
62	0.30927896	8.79442690	2.71993121		62.00000000	0.55387097	4.87097774	1.345985
63	0.31944209	8.77970980	2.80460885		63.00000000	0.54507937	4.78563864	1.367473
64	0.32924575	8.79168510	2.89462495		64.00000000	0.53656250	4.71728854	1.388850
65	0.33939698	8.78763010	2.98249512		65.00000000	0.52830769	4.64257258	1.410211
66	0.34923336	8.79151150	3.07028910		66.00000000	0.52030303	4.57425007	1.431567
67	0.35936448	8.78868960	3.15834287		67.00000000	0.51253731	4.50453136	1.453043
68	0.36952835	8.77764510	3.24358871		68.00000000	0.50500000	4.43271078	1.474421
69	0.37935433	8.80263610	3.33931812		69.00000000	0.49768116	4.38090614	1.495793
70	0.38948619	8.78592300	3.42199567		70.00000000	0.49057143	4.31012280	1.517148
71	0.39931068	8.77919860	3.50562776		71.00000000	0.48366197	4.24616451	1.538612
72	0.40945074	8.78246500	3.59598679		72.00000000	0.47694444	4.18874789	1.559983
73	0.41930276	8.76678090	3.67593543		73.00000000	0.47041096	4.12398981	1.581370
74	0.42944133	8.77216430	3.76712990		74.00000000	0.46405405	4.07075841	1.602848
75	0.43925613	8.76999860	3.85227565		75.00000000	0.45786667	4.01549003	1.624232
76	0.44938502	8.75272750	3.93334462		76.00000000	0.45184211	3.95485082	1.645580
77	0.45952582	8.75663760	4.02390107		77.00000000	0.44597403	3.90523292	1.666944
78	0.46939048	8.74561980	4.10511068		78.00000000	0.44025641	3.85031518	1.688424
79	0.47953427	8.73023410	4.18644644		79.00000000	0.43468354	3.79488910	1.709804
80	0.48934981	8.70907690	4.26178513		80.00000000	0.42925000	3.73837126	1.731154
81	0.49947873	8.68472480	4.33783531		81.00000000	0.42395062	3.68189444	1.752531
82	0.50928760	8.63823510	4.39934602		82.00000000	0.41878049	3.61752431	1.774023
83	0.51943356	8.59363170	4.46382071		83.00000000	0.41373494	3.55548569	1.795389
84	0.52920896	8.50913240	4.50310911		84.00000000	0.40880952	3.47861436	1.816755
85	0.53934377	8.39967160	4.53031055		85.00000000	0.40400000	3.39346733	1.838127
86	0.54949278	8.23835950	4.52691906		86.00000000	0.39930233	3.28959611	1.859608
87	0.55930090	8.03306290	4.49289931		87.00000000	0.39471264	3.17075149	1.880999
88	0.56940597	7.71737530	4.39431957		88.00000000	0.39022727	3.01153032	1.902348
89	0.57922447	7.32992170	4.24567001		89.00000000	0.38584270	2.82819675	1.923726
90	0.58932585	6.75788500	3.98259632		90.00000000	0.38155556	2.57850857	1.945201
91	0.59913844	6.06251000	3.63228278		91.00000000	0.37736264	2.28776476	1.966577
92	0.60923976	5.15141110	3.13844446		92.00000000	0.37326087	1.92282019	1.988049
93	0.61904341	4.03560260	2.49821319		93.00000000	0.36924731	1.49013541	2.009445
94	0.62914920	2.65619750	1.67114453		94.00000000	0.36531915	0.97035981	2.030928
95	0.63926101	1.00828030	0.64455428		95.00000000	0.36147368	0.36446679	2.052307
96	0.64901030	-0.85235453	-0.55318687		96.00000000	0.35770833	-0.30489432	2.073668
97	0.65907890	-3.05026940	-2.01036820		97.00000000	0.35402062	-1.07985826	2.095030
98	0.66887289	-5.49112840	-3.67286692		98.00000000	0.35040816	-1.92413622	2.116539
99	0.67913872	-8.39223100	-5.69948902		99.00000000	0.34686869	-2.91100215	2.137921
100	0.68430996	-9.99840740	-6.84200977		100.00000000	0.34340000	-3.43345310	2.159295
101	0.68429655	-10.00000800	-6.84297097		101.00000000	0.34000000	-3.40000272	2.180649
