# Supplementary material for: Study on the Electrical Injection Regeneration of Industrialized B-Doped Czochralski Silicon PERC Solar Cells
Source: Hindawi journal article supplement (doi:10.1155/2019/5357370), 2019-06-20
Supplement: f1 [file 5357370.f1.zip › section3.2/IVRawData_1-2-5h.csv]

19:52 02/04/2018
Test Lot:	JK-PERC
Recipe:	Recipe_YJX-LID
Cell Name:	1-2-5h
Test Order:	2
Test Condition:	Light
1	-0.29984641	8.80193710	-2.63922924		1.00000000	34.34000000	302.25852001	0.000000
2	-0.29005733	8.79548070	-2.55119365		2.00000000	17.17000000	151.01840362	0.061729
3	-0.27989161	8.80661200	-2.46489681		3.00000000	11.44666667	100.80635203	0.083248
4	-0.27007127	8.80629830	-2.37832817		4.00000000	8.58500000	75.60207091	0.104648
5	-0.25991151	8.80339910	-2.28810475		5.00000000	6.86800000	60.46174502	0.125997
6	-0.24975173	8.80910870	-2.20009014		6.00000000	5.72333333	50.41746546	0.147424
7	-0.23992988	8.81260110	-2.11440632		7.00000000	4.90571429	43.23210311	0.168937
8	-0.22980437	8.79682920	-2.02154979		8.00000000	4.29250000	37.76038934	0.190317
9	-0.21999145	8.80734630	-1.93754088		9.00000000	3.81555556	33.60491910	0.211671
10	-0.20984286	8.80580230	-1.84783474		10.00000000	3.43400000	30.23912510	0.233049
11	-0.20004557	8.80061720	-1.76052448		11.00000000	3.12181818	27.47392679	0.254527
12	-0.18984562	8.81294630	-1.67309925		12.00000000	2.86166667	25.21971466	0.275903
13	-0.18009746	8.79504490	-1.58396525		13.00000000	2.64153846	23.23244937	0.297263
14	-0.16993845	8.79503820	-1.49461516		14.00000000	2.45285714	21.57297227	0.318634
15	-0.16009277	8.80726620	-1.40997964		15.00000000	2.28933333	20.16276809	0.340108
16	-0.14998139	8.80036540	-1.31989104		16.00000000	2.14625000	18.88778424	0.361476
17	-0.13982834	8.79507830	-1.22980120		17.00000000	2.02000000	17.76605817	0.382840
18	-0.13001989	8.80108640	-1.14431629		18.00000000	1.90777778	16.79051705	0.404208
19	-0.11987203	8.80156230	-1.05506114		19.00000000	1.80736842	15.90766576	0.425681
20	-0.11007401	8.80178740	-0.96884803		20.00000000	1.71700000	15.11266897	0.447046
21	-0.09989490	8.79834270	-0.87890953		21.00000000	1.63523810	14.38738516	0.468430
22	-0.09006040	8.80526160	-0.79300536		22.00000000	1.56090909	13.74421288	0.489776
23	-0.07989021	8.79136850	-0.70234431		23.00000000	1.49304348	13.12589540	0.511250
24	-0.07008474	8.79272370	-0.61623578		24.00000000	1.43083333	12.58092216	0.532646
25	-0.05992721	8.81751920	-0.52840936		25.00000000	1.37360000	12.11174437	0.554034
26	-0.04979648	8.78773590	-0.43759832		26.00000000	1.32076923	11.60657118	0.575505
27	-0.03996124	8.80837060	-0.35199339		27.00000000	1.27185185	11.20294246	0.596907
28	-0.02981413	8.79736800	-0.26228589		28.00000000	1.22642857	10.78934347	0.618252
29	-0.01997666	8.80636790	-0.17592177		29.00000000	1.18413793	10.42795427	0.639632
30	-0.00981094	8.78596500	-0.08619857		30.00000000	1.14466667	10.05700127	0.661107
31	-0.00065301	8.80832390	-0.00575195		31.00000000	1.10774194	9.75734977	0.682611
32	0.00953036	8.81228730	0.08398424		32.00000000	1.07312500	9.45668581	0.703992
33	0.01930950	8.80298710	0.16998126		33.00000000	1.04060606	9.16044173	0.725375
34	0.02944441	8.79795270	0.25905051		34.00000000	1.01000000	8.88593223	0.746854
35	0.03929351	8.80323410	0.34590999		35.00000000	0.98114286	8.63723026	0.768240
36	0.04942693	8.80193040	0.43505242		36.00000000	0.95388889	8.39606361	0.789596
37	0.05926041	8.79913040	0.52144007		37.00000000	0.92810811	8.16654427	0.810966
38	0.06938564	8.79648210	0.61034954		38.00000000	0.90368421	7.94924198	0.832461
39	0.07949748	8.80223270	0.69975531		39.00000000	0.88051282	7.75047874	0.853833
40	0.08936817	8.79103850	0.78563898		40.00000000	0.85850000	7.54710655	0.875174
41	0.09946289	8.81410790	0.87667664		41.00000000	0.83756098	7.38235281	0.896569
42	0.10933656	8.79859160	0.96200774		42.00000000	0.81761905	7.19389608	0.918046
43	0.11948486	8.79590990	1.05097806		43.00000000	0.79860465	7.02445456	0.939430
44	0.12928335	8.79293440	1.13678002		44.00000000	0.78045455	6.86248562	0.960779
45	0.13943091	8.80061720	1.22707806		45.00000000	0.76311111	6.71584877	0.982149
46	0.14922643	8.80274010	1.31360148		46.00000000	0.74652174	6.57143685	1.003630
47	0.15940154	8.80096630	1.40288758		47.00000000	0.73063830	6.43032304	1.025007
48	0.16956174	8.79543210	1.49136877		48.00000000	0.71541667	6.29239871	1.046368
49	0.17934759	8.80522350	1.57919561		49.00000000	0.70081633	6.17084439	1.067726
50	0.18949813	8.79407410	1.66646060		50.00000000	0.68680000	6.03977009	1.089196
51	0.19927578	8.80503650	1.75463052		51.00000000	0.67333333	5.92872458	1.110567
52	0.20945163	8.79822440	1.84280244		52.00000000	0.66038462	5.81021204	1.131956
53	0.21927765	8.80495450	1.93072973		53.00000000	0.64792453	5.70494599	1.153307
54	0.22942895	8.80060390	2.01911331		54.00000000	0.63592593	5.59653218	1.174819
55	0.23927283	8.79820920	2.10517241		55.00000000	0.62436364	5.49328189	1.196202
56	0.24941444	8.79584120	2.19380981		56.00000000	0.61321429	5.39373548	1.217592
57	0.25956351	8.80515190	2.28549613		57.00000000	0.60245614	5.30471783	1.239064
58	0.26938060	8.78058620	2.36531958		58.00000000	0.59206897	5.19871259	1.260453
59	0.27949020	8.80860420	2.46191855		59.00000000	0.58203390	5.12690624	1.281802
60	0.28935418	8.78842160	2.54296653		60.00000000	0.57233333	5.02990663	1.303179
61	0.29948539	8.79996970	2.63546236		61.00000000	0.56295082	4.95395016	1.324671
62	0.30931142	8.79127500	2.71924175		62.00000000	0.55387097	4.86923199	1.346050
63	0.31943440	8.78545280	2.80637584		63.00000000	0.54507937	4.78876903	1.367417
64	0.32927161	8.78464030	2.89253265		64.00000000	0.53656250	4.71350856	1.388805
65	0.33941397	8.78821280	2.98284220		65.00000000	0.52830769	4.64288042	1.410286
66	0.34923926	8.80249980	3.07417852		66.00000000	0.52030303	4.57996732	1.431677
67	0.35939574	8.80035690	3.16281078		67.00000000	0.51253731	4.51051128	1.453042
68	0.36954775	8.79863640	3.25151628		68.00000000	0.50500000	4.44331138	1.474420
69	0.37937826	8.78096200	3.33130608		69.00000000	0.49768116	4.37011935	1.495906
70	0.38952136	8.78925800	3.42360373		70.00000000	0.49057143	4.31175885	1.517285
71	0.39932880	8.79581260	3.51242129		71.00000000	0.48366197	4.25420007	1.538627
72	0.40948379	8.77283950	3.59233557		72.00000000	0.47694444	4.18415706	1.560010
73	0.41929495	8.79204650	3.68646070		73.00000000	0.47041096	4.13587502	1.581486
74	0.42945963	8.77244570	3.76741128		74.00000000	0.46405405	4.07088899	1.602869
75	0.43927896	8.77937980	3.85659683		75.00000000	0.45786667	4.01978536	1.624208
76	0.44939378	8.76716610	3.93990991		76.00000000	0.45184211	3.96137479	1.645586
77	0.45955473	8.75627040	4.02398548		77.00000000	0.44597403	3.90506916	1.667049
78	0.46940979	8.75267030	4.10858913		78.00000000	0.44025641	3.85341921	1.688433
79	0.47955289	8.74474720	4.19356879		79.00000000	0.43468354	3.80119771	1.709799
80	0.48937744	8.71075440	4.26284669		80.00000000	0.42925000	3.73909133	1.731165
81	0.49947438	8.68269350	4.33678295		81.00000000	0.42395062	3.68103327	1.752648
82	0.50930935	8.65426540	4.40769829		82.00000000	0.41878049	3.62423749	1.774018
83	0.51944125	8.57608600	4.45477283		83.00000000	0.41373494	3.54822642	1.795402
84	0.52924275	8.51739310	4.50776855		84.00000000	0.40880952	3.48199142	1.816744
85	0.53936279	8.39051630	4.52553228		85.00000000	0.40400000	3.38976859	1.838211
86	0.54949021	8.23201470	4.52341149		86.00000000	0.39930233	3.28706261	1.859597
87	0.55932593	8.01936340	4.48543789		87.00000000	0.39471264	3.16534413	1.880982
88	0.56944299	7.70080140	4.38516737		88.00000000	0.39022727	3.00506273	1.902481
89	0.57926083	7.29861690	4.22780288		89.00000000	0.38584270	2.81611803	1.923864
90	0.58936745	6.72722390	3.96480680		90.00000000	0.38155556	2.56680965	1.945199
91	0.59916598	6.03754660	3.61749253		91.00000000	0.37736264	2.27834451	1.966585
92	0.60928005	5.11528730	3.11664250		92.00000000	0.37326087	1.90933659	1.988131
93	0.61905843	3.99494670	2.47310543		93.00000000	0.36924731	1.47512333	2.009513
94	0.62919331	2.62421370	1.65113770		94.00000000	0.36531915	0.95867552	2.030874
95	0.63925231	0.97748929	0.62486229		95.00000000	0.36147368	0.35333665	2.052245
96	0.64903075	-0.85240549	-0.55323737		96.00000000	0.35770833	-0.30491255	2.073726
97	0.65913886	-3.02748730	-1.99553453		97.00000000	0.35402062	-1.07179293	2.095127
98	0.66889566	-5.41595700	-3.62271013		98.00000000	0.35040816	-1.89779554	2.116467
99	0.67913032	-8.23701480	-5.59400650		99.00000000	0.34686869	-2.85716251	2.137885
100	0.68495059	-9.99757190	-6.84784277		100.00000000	0.34340000	-3.43316619	2.159395
101	0.68488359	-10.00035100	-6.84907629		101.00000000	0.34000000	-3.40011934	2.180777
19:52 02/04/2018
Test Lot:	JK-PERC
Recipe:	Recipe_YJX-LID
Cell Name:	1-2-5h
Test Order:	3
Test Condition:	Light
1	-0.29986587	8.79322150	-2.63678702		1.00000000	34.34000000	301.95922631	0.000000
2	-0.28997254	8.79896260	-2.55145753		2.00000000	17.17000000	151.07818784	0.061718
3	-0.27986786	8.81797030	-2.46786648		3.00000000	11.44666667	100.93636670	0.083257
4	-0.27003926	8.79500870	-2.37499764		4.00000000	8.58500000	75.50514969	0.104646
5	-0.25991893	8.79937460	-2.28712403		5.00000000	6.86800000	60.43410475	0.126014
6	-0.24976882	8.81283860	-2.20117230		6.00000000	5.72333333	50.43881292	0.147436
7	-0.23990154	8.79704670	-2.11042505		7.00000000	4.90571429	43.15579767	0.168926
8	-0.22979163	8.79906270	-2.02195096		8.00000000	4.29250000	37.76997664	0.190315
9	-0.21997571	8.82208350	-1.94064408		9.00000000	3.81555556	33.66114971	0.211667
10	-0.20982261	8.77560710	-1.84132079		10.00000000	3.43400000	30.13543478	0.233049
11	-0.19997320	8.80873300	-1.76151053		11.00000000	3.12181818	27.49926284	0.254532
12	-0.18988413	8.79826160	-1.67065025		12.00000000	2.86166667	25.17769195	0.275911
13	-0.18007416	8.80490490	-1.58553585		13.00000000	2.64153846	23.25849494	0.297263
14	-0.16996200	8.80043600	-1.49573970		14.00000000	2.45285714	21.58621230	0.318631
15	-0.16009994	8.79511550	-1.40809746		15.00000000	2.28933333	20.13495108	0.340109
16	-0.14995131	8.80398850	-1.32016961		16.00000000	2.14625000	18.89556032	0.361499
17	-0.13982278	8.79969980	-1.23039849		17.00000000	2.02000000	17.77539360	0.382851
18	-0.13000984	8.80086800	-1.14419944		18.00000000	1.90777778	16.79010040	0.404220
19	-0.11983963	8.80216120	-1.05484774		19.00000000	1.80736842	15.90874819	0.425700
20	-0.11001627	8.79839800	-0.96796693		20.00000000	1.71700000	15.10684937	0.447071
21	-0.09987137	8.80020050	-0.87888805		21.00000000	1.63523810	14.39042310	0.468459
22	-0.09000856	8.78979680	-0.79115693		22.00000000	1.56090909	13.72007373	0.489812
23	-0.07988598	8.80646900	-0.70351342		23.00000000	1.49304348	13.14844111	0.511284
24	-0.07010430	8.80287080	-0.61711910		24.00000000	1.43083333	12.59544097	0.532660
25	-0.05992441	8.79855540	-0.52724827		25.00000000	1.37360000	12.08569570	0.554046
26	-0.04974453	8.80459590	-0.43798047		26.00000000	1.32076923	11.62883935	0.575442
27	-0.03993307	8.78801630	-0.35093251		27.00000000	1.27185185	11.17705481	0.596904
28	-0.02977626	8.80297090	-0.26211957		28.00000000	1.22642857	10.79621503	0.618274
29	-0.01998267	8.79439450	-0.17573549		29.00000000	1.18413793	10.41377611	0.639654
30	-0.00980651	8.81279850	-0.08642278		30.00000000	1.14466667	10.08771668	0.661140
31	-0.00064707	8.79490380	-0.00569089		31.00000000	1.10774194	9.74248376	0.682634
32	0.00952145	8.80173110	0.08380520		32.00000000	1.07312500	9.44535769	0.704005
33	0.01934378	8.78940300	0.17002031		33.00000000	1.04060606	9.14630603	0.725388
34	0.02947947	8.79700280	0.25933094		34.00000000	1.01000000	8.88497283	0.746868
35	0.03929213	8.79114250	0.34542269		35.00000000	0.98114286	8.62536667	0.768246
36	0.04944940	8.79847150	0.43507909		36.00000000	0.95388889	8.39276420	0.789608
37	0.05927248	8.78520580	0.52072093		37.00000000	0.92810811	8.15362073	0.810978
38	0.06942082	8.80896380	0.61152545		38.00000000	0.90368421	7.96052150	0.832455
39	0.07955948	8.79880710	0.70002847		39.00000000	0.88051282	7.74746246	0.853827
40	0.08939967	8.78915980	0.78574801		40.00000000	0.85850000	7.54549369	0.875183
41	0.09949815	8.79002380	0.87459106		41.00000000	0.83756098	7.36218091	0.896559
42	0.10931825	8.79944800	0.96194026		42.00000000	0.81761905	7.19459629	0.918053
43	0.11948147	8.79234700	1.05052254		43.00000000	0.79860465	7.02160921	0.939420
44	0.12926957	8.79952430	1.13751072		44.00000000	0.78045455	6.86762874	0.960794
45	0.13944024	8.79454990	1.22631415		45.00000000	0.76311111	6.71121875	0.982175
46	0.14929457	8.80289550	1.31422450		46.00000000	0.74652174	6.57155286	1.003644
47	0.15943547	8.79842850	1.40278158		47.00000000	0.73063830	6.42846882	1.025038
48	0.16954733	8.80245020	1.49243193		48.00000000	0.71541667	6.29741958	1.046372
49	0.17940317	8.80212500	1.57912913		49.00000000	0.70081633	6.16867291	1.067740
50	0.18949121	8.79029940	1.66568447		50.00000000	0.68680000	6.03717763	1.089236
51	0.19931802	8.80994990	1.75598177		51.00000000	0.67333333	5.93203293	1.110616
52	0.20943211	8.78114410	1.83905354		52.00000000	0.66038462	5.79893247	1.132028
53	0.21929687	8.81584260	1.93328669		53.00000000	0.64792453	5.71200066	1.153383
54	0.22940949	8.77772140	2.01369259		54.00000000	0.63592593	5.58198061	1.174860
55	0.23924001	8.80566600	2.10666762		55.00000000	0.62436364	5.49793764	1.196245
56	0.24938537	8.79398250	2.19309058		56.00000000	0.61321429	5.39259570	1.217623
57	0.25954935	8.80345440	2.28493087		57.00000000	0.60245614	5.30369516	1.239006
58	0.26940814	8.79932790	2.37061056		58.00000000	0.59206897	5.20980897	1.260470
59	0.27952522	8.78841020	2.45658229		59.00000000	0.58203390	5.11515265	1.281848
60	0.28933266	8.80077650	2.54635207		60.00000000	0.57233333	5.03697775	1.303228
61	0.29953459	8.78076360	2.63014242		61.00000000	0.56295082	4.94313807	1.324714
62	0.30932269	8.79671960	2.72102497		62.00000000	0.55387097	4.87224760	1.346100
63	0.31950155	8.79144570	2.80888053		63.00000000	0.54507937	4.79203564	1.367442
64	0.32930899	8.77995110	2.89131683		64.00000000	0.53656250	4.71099251	1.388835
65	0.33943650	8.80616190	2.98913277		65.00000000	0.52830769	4.65236307	1.410300
66	0.34926850	8.78389640	3.06793832		66.00000000	0.52030303	4.57028791	1.431681
67	0.35941535	8.79546640	3.16122563		67.00000000	0.51253731	4.50800472	1.453027
68	0.36954656	8.78703500	3.24721856		68.00000000	0.50500000	4.43745268	1.474405
69	0.37939420	8.79203030	3.33564530		69.00000000	0.49768116	4.37562783	1.495875
70	0.38954777	8.78417680	3.42185648		70.00000000	0.49057143	4.30926616	1.517245
71	0.39936489	8.78987030	3.51036559		71.00000000	0.48366197	4.25132600	1.538582
72	0.40951845	8.78134630	3.59612333		72.00000000	0.47694444	4.18821433	1.559956
73	0.41934448	8.79748340	3.68917610		73.00000000	0.47041096	4.13843260	1.581436
74	0.42946529	8.76827910	3.76567153		74.00000000	0.46405405	4.06895546	1.602797
75	0.43925935	8.77547840	3.85471094		75.00000000	0.45786667	4.01799904	1.624151
76	0.44942033	8.75299260	3.93377282		76.00000000	0.45184211	3.95497060	1.645526
77	0.45957315	8.78598210	4.03780147		77.00000000	0.44597403	3.91831981	1.667005
78	0.46942303	8.73772140	4.10168765		78.00000000	0.44025641	3.84683786	1.688401
79	0.47955424	8.74332710	4.19289958		79.00000000	0.43468354	3.80058041	1.709754
80	0.48935202	8.71132950	4.26290669		80.00000000	0.42925000	3.73933819	1.731127
81	0.49951747	8.69610600	4.34385687		81.00000000	0.42395062	3.68671951	1.752608
82	0.50933236	8.65220450	4.40684774		82.00000000	0.41878049	3.62337442	1.774011
83	0.51946950	8.58154870	4.45785281		83.00000000	0.41373494	3.55048653	1.795389
84	0.52925986	8.51562210	4.50697696		84.00000000	0.40880952	3.48126742	1.816750
85	0.53937393	8.40834710	4.53524322		85.00000000	0.40400000	3.39697223	1.838222
86	0.54952377	8.23995300	4.52805004		86.00000000	0.39930233	3.29023240	1.859611
87	0.55932975	8.02759080	4.49007036		87.00000000	0.39471264	3.16859159	1.881001
88	0.56946021	7.71436930	4.39302636		88.00000000	0.39022727	3.01035729	1.902357
89	0.57926619	7.30886320	4.23377734		89.00000000	0.38584270	2.82007149	1.923815
90	0.58937508	6.75903990	3.98360968		90.00000000	0.38155556	2.57894922	1.945177
91	0.59916687	6.05587010	3.62847673		91.00000000	0.37736264	2.28525911	1.966554
92	0.60930181	5.13885160	3.13111158		92.00000000	0.37326087	1.91813222	1.988107
93	0.61909962	4.02700280	2.49311590		93.00000000	0.36924731	1.48695996	2.009499
94	0.62921071	2.63406320	1.65738078		94.00000000	0.36531915	0.96227373	2.030869
95	0.63929582	0.98289067	0.62835790		95.00000000	0.36147368	0.35528911	2.052240
96	0.64901471	-0.86867058	-0.56377998		96.00000000	0.35770833	-0.31073071	2.073711
97	0.65911615	-3.05944010	-2.01652638		97.00000000	0.35402062	-1.08310488	2.095112
98	0.66890347	-5.50505400	-3.68234972		98.00000000	0.35040816	-1.92901586	2.116464
99	0.67912549	-8.38345530	-5.69341819		99.00000000	0.34686869	-2.90795813	2.137882
100	0.68437791	-9.99855520	-6.84279031		100.00000000	0.34340000	-3.43350386	2.159387
101	0.68435782	-10.00024000	-6.84374245		101.00000000	0.34000000	-3.40008160	2.180774
19:53 02/04/2018
Test Lot:	JK-PERC
Recipe:	Recipe_YJX-LID
Cell Name:	1-2-5h
Test Order:	4
Test Condition:	Light
1	-0.29988882	8.79877190	-2.63865332		1.00000000	34.34000000	302.14982705	0.000000
2	-0.29006487	8.79401210	-2.55083398		2.00000000	17.17000000	150.99318776	0.061751
3	-0.27990973	8.80387310	-2.46428974		3.00000000	11.44666667	100.77500075	0.083276
4	-0.27009919	8.79475310	-2.37545569		4.00000000	8.58500000	75.50295536	0.104689
5	-0.25992024	8.79967780	-2.28721437		5.00000000	6.86800000	60.43618713	0.126051
6	-0.24977328	8.79628660	-2.19707736		6.00000000	5.72333333	50.34408031	0.147440
7	-0.23993669	8.80129530	-2.11175366		7.00000000	4.90571429	43.17664009	0.168935
8	-0.22979942	8.79810430	-2.02179927		8.00000000	4.29250000	37.76586271	0.190305
9	-0.21995166	8.80671220	-1.93705097		9.00000000	3.81555556	33.60249966	0.211660
10	-0.20983894	8.79723450	-1.84600236		10.00000000	3.43400000	30.20970327	0.233034
11	-0.20000534	8.79324910	-1.75869678		11.00000000	3.12181818	27.45092492	0.254517
12	-0.18983680	8.79318430	-1.66926997		12.00000000	2.86166667	25.16316241	0.275914
13	-0.18006422	8.80282880	-1.58507450		13.00000000	2.64153846	23.25301085	0.297270
14	-0.16992247	8.79745200	-1.49488477		14.00000000	2.45285714	21.57889298	0.318647
15	-0.16009630	8.80760480	-1.41006494		15.00000000	2.28933333	20.16354326	0.340130
16	-0.14994638	8.78495880	-1.31727277		16.00000000	2.14625000	18.85471782	0.361503
17	-0.13978304	8.79791070	-1.22979870		17.00000000	2.02000000	17.77177961	0.382915
18	-0.12995985	8.80447100	-1.14422773		18.00000000	1.90777778	16.79697412	0.404308
19	-0.11984044	8.79639720	-1.05416411		19.00000000	1.80736842	15.89833052	0.425795
20	-0.11001204	8.79385850	-0.96743031		20.00000000	1.71700000	15.09905504	0.447177
21	-0.09984350	8.80084610	-0.87870730		21.00000000	1.63523810	14.39147881	0.468568
22	-0.09003371	8.79743000	-0.79206526		22.00000000	1.56090909	13.73198846	0.489923
23	-0.07988973	8.79090500	-0.70230303		23.00000000	1.49304348	13.12520338	0.511394
24	-0.07005464	8.80520820	-0.61684565		24.00000000	1.43083333	12.59878540	0.532768
25	-0.05996276	8.79780010	-0.52754035		25.00000000	1.37360000	12.08465822	0.554148
26	-0.04980166	8.79589270	-0.43805005		26.00000000	1.32076923	11.61734444	0.575561
27	-0.03996061	8.80365280	-0.35179932		27.00000000	1.27185185	11.19694212	0.597012
28	-0.02981514	8.79719160	-0.26228951		28.00000000	1.22642857	10.78912713	0.618403
29	-0.02003885	8.80057050	-0.17635327		29.00000000	1.18413793	10.42108934	0.639801
30	-0.00987403	8.80320740	-0.08692309		30.00000000	1.14466667	10.07673807	0.661162
31	-0.00068274	8.79290770	-0.00600329		31.00000000	1.10774194	9.74027259	0.682755
32	0.00949378	8.79927250	0.08353834		32.00000000	1.07312500	9.44271930	0.704125
33	0.01930999	8.79288580	0.16979050		33.00000000	1.04060606	9.14993025	0.725494
34	0.02944102	8.78960990	0.25877511		34.00000000	1.01000000	8.87750600	0.746866
35	0.03926989	8.78536420	0.34500026		35.00000000	0.98114286	8.61969733	0.768353
36	0.04940167	8.80150220	0.43480888		36.00000000	0.95388889	8.39565515	0.789730
37	0.05922309	8.80570890	0.52150126		37.00000000	0.92810811	8.17264983	0.811127
38	0.06938911	8.79322620	0.61015410		38.00000000	0.90368421	7.94629968	0.832481
39	0.07951716	8.79320620	0.69921081		39.00000000	0.88051282	7.74253079	0.853953
40	0.08931924	8.79963590	0.78597676		40.00000000	0.85850000	7.55448742	0.875348
41	0.09951800	8.79705620	0.87546545		41.00000000	0.83756098	7.36807097	0.896729
42	0.10934611	8.78827480	0.96096366		42.00000000	0.81761905	7.18546087	0.918265
43	0.11944515	8.80639360	1.05188100		43.00000000	0.79860465	7.03282689	0.939645
44	0.12930304	8.79760650	1.13755727		44.00000000	0.78045455	6.86613198	0.960991
45	0.13944896	8.79674430	1.22669684		45.00000000	0.76311111	6.71289332	0.982370
46	0.14926964	8.79289440	1.31251218		46.00000000	0.74652174	6.56408682	1.003852
47	0.15945500	8.80101780	1.40336629		47.00000000	0.73063830	6.43036066	1.025230
48	0.16955478	8.79137710	1.49062001		48.00000000	0.71541667	6.28949770	1.046587
49	0.17938216	8.80675700	1.57977509		49.00000000	0.70081633	6.17191909	1.067958
50	0.18953998	8.79792400	1.66755834		50.00000000	0.68680000	6.04241420	1.089437
51	0.19932121	8.78554630	1.75114572		51.00000000	0.67333333	5.91560118	1.110829
52	0.20947458	8.80590440	1.84461313		52.00000000	0.66038462	5.81528379	1.132181
53	0.21928856	8.78936770	1.92740779		53.00000000	0.64792453	5.69484692	1.153555
54	0.22945160	8.80236430	2.01971657		54.00000000	0.63592593	5.59765167	1.175039
55	0.23927005	8.78644750	2.10233373		55.00000000	0.62436364	5.48593831	1.196425
56	0.24938768	8.80469800	2.19578321		56.00000000	0.61321429	5.39916660	1.217770
57	0.25953287	8.80127140	2.28421923		57.00000000	0.60245614	5.30238000	1.239157
58	0.26935652	8.78816320	2.36714906		58.00000000	0.59206897	5.20319869	1.260636
59	0.27950168	8.79167560	2.45728810		59.00000000	0.58203390	5.11705322	1.282033
60	0.28932905	8.78375530	2.54139558		60.00000000	0.57233333	5.02723595	1.303388
61	0.29946235	8.80311390	2.63620118		61.00000000	0.56295082	4.95572019	1.324768
62	0.30931130	8.78829000	2.71831740		62.00000000	0.55387097	4.86757869	1.346274
63	0.31944308	8.80819030	2.81371544		63.00000000	0.54507937	4.80116278	1.367662
64	0.32923248	8.79374500	2.89518647		64.00000000	0.53656250	4.71839380	1.389022
65	0.33942530	8.79318620	2.98462986		65.00000000	0.52830769	4.64550791	1.410389
66	0.34921992	8.78546240	3.06805848		66.00000000	0.52030303	4.57110271	1.431859
67	0.35937628	8.79699800	3.16143242		67.00000000	0.51253731	4.50878972	1.453228
68	0.36953485	8.78541280	3.24651620		68.00000000	0.50500000	4.43663346	1.474623
69	0.37934881	8.79436110	3.33613042		69.00000000	0.49768116	4.37678783	1.495969
70	0.38950515	8.79041580	3.42391222		70.00000000	0.49057143	4.31232684	1.517440
71	0.39929757	8.78225520	3.50673316		71.00000000	0.48366197	4.24764287	1.538829
72	0.40949556	8.78591350	3.59779257		72.00000000	0.47694444	4.19039263	1.560205
73	0.41932964	8.78369900	3.68326534		73.00000000	0.47041096	4.13194827	1.581698
74	0.42946738	8.77960210	3.77055271		74.00000000	0.46405405	4.07420995	1.603074
75	0.43925384	8.77534290	3.85460307		75.00000000	0.45786667	4.01793700	1.624432
76	0.44942057	8.77436350	3.94337945		76.00000000	0.45184211	3.96462688	1.645809
77	0.45956203	8.74777220	4.02014395		77.00000000	0.44597403	3.90127919	1.667292
78	0.46943110	8.75482270	4.10978605		78.00000000	0.44025641	3.85436681	1.688668
79	0.47955841	8.73528100	4.18907747		79.00000000	0.43468354	3.79708291	1.710025
80	0.48936570	8.71878910	4.26667633		80.00000000	0.42925000	3.74254022	1.731408
81	0.49952948	8.68768880	4.33975667		81.00000000	0.42395062	3.68315103	1.752884
82	0.50932485	8.65903470	4.41026155		82.00000000	0.41878049	3.62623478	1.774279
83	0.51947075	8.58858110	4.46151667		83.00000000	0.41373494	3.55339608	1.795625
84	0.52924979	8.51572990	4.50694826		84.00000000	0.40880952	3.48131149	1.817006
85	0.53938305	8.39962480	4.53061524		85.00000000	0.40400000	3.39344842	1.838499
86	0.54949993	8.24764350	4.53207953		86.00000000	0.39930233	3.29330323	1.859862
87	0.55931467	8.02640250	4.48928467		87.00000000	0.39471264	3.16812255	1.881211
88	0.56947100	7.71441080	4.39313323		88.00000000	0.39022727	3.01037349	1.902588
89	0.57924032	7.31265690	4.23578572		89.00000000	0.38584270	2.82153526	1.924069
90	0.58936983	6.75114870	3.97892336		90.00000000	0.38155556	2.57593829	1.945447
91	0.59912354	6.05854650	3.62981783		91.00000000	0.37736264	2.28626909	1.966791
92	0.60925907	5.12597990	3.12304975		92.00000000	0.37326087	1.91332771	1.988264
93	0.61904401	4.02024980	2.48871156		93.00000000	0.36924731	1.48446643	2.009758
94	0.62915868	2.62953570	1.65439521		94.00000000	0.36531915	0.96061974	2.031186
95	0.63925844	0.97775292	0.62503681		95.00000000	0.36147368	0.35343195	2.052561
96	0.64901584	-0.87532032	-0.56809675		96.00000000	0.35770833	-0.31310937	2.073942
97	0.65910375	-3.07276990	-2.02527416		97.00000000	0.35402062	-1.08782390	2.095432
98	0.66889983	-5.51584010	-3.68954451		98.00000000	0.35040816	-1.93279540	2.116818
99	0.67912614	-8.38240620	-5.69271117		99.00000000	0.34686869	-2.90759423	2.138207
100	0.68428993	-9.99874210	-6.84203853		100.00000000	0.34340000	-3.43356804	2.159562
101	0.68433678	-10.00026600	-6.84354983		101.00000000	0.34000000	-3.40009044	2.181037
