# Supplementary material for: Study on the Electrical Injection Regeneration of Industrialized B-Doped Czochralski Silicon PERC Solar Cells
Source: Hindawi journal article supplement (doi:10.1155/2019/5357370), 2019-06-20
Supplement: f1 [file 5357370.f1.zip › section3.2/IVRawData_1-2-6h.csv]

20:55 02/04/2018
Test Lot:	JK-PERC
Recipe:	Recipe_YJX-LID
Cell Name:	1-2-6h
Test Order:	2
Test Condition:	Light
1	-0.29983270	8.81247710	-2.64226880		1.00000000	34.34000000	302.62046361	0.000000
2	-0.29004610	8.80351920	-2.55342641		2.00000000	17.17000000	151.15642466	0.061851
3	-0.27992606	8.80916500	-2.46591485		3.00000000	11.44666667	100.83557537	0.083279
4	-0.27009255	8.80064680	-2.37698914		4.00000000	8.58500000	75.55355278	0.104783
5	-0.25995016	8.81257440	-2.29083013		5.00000000	6.86800000	60.52476098	0.126215
6	-0.24976908	8.80033110	-2.19805060		6.00000000	5.72333333	50.36722833	0.147608
7	-0.23992665	8.81015590	-2.11379119		7.00000000	4.90571429	43.22010766	0.168955
8	-0.22982296	8.80643460	-2.02392087		8.00000000	4.29250000	37.80162052	0.190429
9	-0.22002594	8.80188850	-1.93664379		9.00000000	3.81555556	33.58409457	0.211801
10	-0.20985080	8.80907440	-1.84859131		10.00000000	3.43400000	30.25036149	0.233182
11	-0.20001507	8.79428010	-1.75898855		11.00000000	3.12181818	27.45414351	0.254660
12	-0.18987492	8.81372550	-1.67350542		12.00000000	2.86166667	25.22194447	0.276050
13	-0.18010171	8.79421710	-1.58385354		13.00000000	2.64153846	23.23026271	0.297389
14	-0.16991839	8.80664630	-1.49641116		14.00000000	2.45285714	21.60144528	0.318775
15	-0.16011094	8.80921650	-1.41045193		15.00000000	2.28933333	20.16723297	0.340255
16	-0.14995441	8.79837890	-1.31935572		16.00000000	2.14625000	18.88352071	0.361630
17	-0.13981278	8.81473730	-1.23241293		17.00000000	2.02000000	17.80576935	0.382983
18	-0.12997332	8.80390930	-1.14427332		18.00000000	1.90777778	16.79590252	0.404357
19	-0.11983020	8.79559520	-1.05397793		19.00000000	1.80736842	15.89688101	0.425832
20	-0.11000711	8.81482700	-0.96969364		20.00000000	1.71700000	15.13505796	0.447208
21	-0.09988409	8.79370120	-0.87835080		21.00000000	1.63523810	14.37979520	0.468557
22	-0.09001858	8.80699830	-0.79279346		22.00000000	1.56090909	13.74692371	0.489936
23	-0.07990448	8.80504420	-0.70356250		23.00000000	1.49304348	13.14631382	0.511410
24	-0.07007470	8.79882430	-0.61657497		24.00000000	1.43083333	12.58965110	0.532794
25	-0.05995093	8.80818840	-0.52805904		25.00000000	1.37360000	12.09892759	0.554151
26	-0.04977579	8.79938220	-0.43799624		26.00000000	1.32076923	11.62195326	0.575529
27	-0.03997951	8.80179310	-0.35189134		27.00000000	1.27185185	11.19457685	0.597011
28	-0.02980289	8.79322240	-0.26206343		28.00000000	1.22642857	10.78425919	0.618399
29	-0.01997757	8.80781940	-0.17595886		29.00000000	1.18413793	10.42967304	0.639744
30	-0.00986794	8.80148120	-0.08685250		30.00000000	1.14466667	10.07476215	0.661112
31	-0.00061275	8.80908490	-0.00539776		31.00000000	1.10774194	9.75819276	0.682705
32	0.00949742	8.79954720	0.08357299		32.00000000	1.07312500	9.44301409	0.704091
33	0.01933585	8.80279160	0.17020948		33.00000000	1.04060606	9.16023829	0.725464
34	0.02943478	8.80639270	0.25921420		34.00000000	1.01000000	8.89445663	0.746826
35	0.03928438	8.81733230	0.34638339		35.00000000	0.98114286	8.65106261	0.768301
36	0.04941902	8.80688670	0.43522774		36.00000000	0.95388889	8.40079137	0.789691
37	0.05921726	8.79782490	0.52098311		37.00000000	0.92810811	8.16533262	0.811081
38	0.06939657	8.80867390	0.61129175		38.00000000	0.90368421	7.96025952	0.832425
39	0.07953196	8.80237770	0.70007035		39.00000000	0.88051282	7.75060642	0.853890
40	0.08936444	8.80048660	0.78645055		40.00000000	0.85850000	7.55521775	0.875271
41	0.09949537	8.81492040	0.87704373		41.00000000	0.83756098	7.38303333	0.896651
42	0.10933529	8.79678820	0.96179939		42.00000000	0.81761905	7.19242159	0.918151
43	0.11947142	8.80442330	1.05187695		43.00000000	0.79860465	7.03125340	0.939526
44	0.12929721	8.79873940	1.13765246		44.00000000	0.78045455	6.86701616	0.960879
45	0.13943259	8.80604550	1.22784973		45.00000000	0.76311111	6.71999117	0.982263
46	0.14927401	8.79484080	1.31284115		46.00000000	0.74652174	6.56553985	1.003740
47	0.15941758	8.80774120	1.40410879		47.00000000	0.73063830	6.43527304	1.025133
48	0.16956489	8.79198550	1.49081205		48.00000000	0.71541667	6.28993296	1.046473
49	0.17939514	8.81404970	1.58119768		49.00000000	0.70081633	6.17702993	1.067843
50	0.18953797	8.80306150	1.66851441		50.00000000	0.68680000	6.04594264	1.089319
51	0.19930123	8.79555990	1.75296591		51.00000000	0.67333333	5.92234367	1.110687
52	0.20945524	8.80145930	1.84351177		52.00000000	0.66038462	5.81234831	1.132033
53	0.21927357	8.80856700	1.93148593		53.00000000	0.64792453	5.70728662	1.153406
54	0.22943278	8.79770280	2.01848141		54.00000000	0.63592593	5.59468730	1.174881
55	0.23923102	8.81380560	2.10853570		55.00000000	0.62436364	5.50301971	1.196273
56	0.24941257	8.80789660	2.19680013		56.00000000	0.61321429	5.40112802	1.217625
57	0.25954273	8.79521940	2.28273525		57.00000000	0.60245614	5.29873393	1.238996
58	0.26937225	8.79719260	2.36971956		58.00000000	0.59206897	5.20854472	1.260473
59	0.27950615	8.80691340	2.46158646		59.00000000	0.58203390	5.12592214	1.281863
60	0.28933343	8.81011300	2.54906021		60.00000000	0.57233333	5.04232134	1.303204
61	0.29949635	8.79419990	2.63383077		61.00000000	0.56295082	4.95070204	1.324583
62	0.30932510	8.80750080	2.72438107		62.00000000	0.55387097	4.87821899	1.346070
63	0.31945083	8.79430680	2.80934861		63.00000000	0.54507937	4.79359517	1.367451
64	0.32928777	8.80046650	2.89788599		64.00000000	0.53656250	4.72200031	1.388822
65	0.33940977	8.79949570	2.98663481		65.00000000	0.52830769	4.64884127	1.410183
66	0.34923702	8.79665660	3.07211814		66.00000000	0.52030303	4.57692709	1.431685
67	0.35937020	8.79207900	3.15961119		67.00000000	0.51253731	4.50626855	1.453072
68	0.36954206	8.80537320	3.25395575		68.00000000	0.50500000	4.44671347	1.474457
69	0.37936783	8.79401300	3.33616563		69.00000000	0.49768116	4.37661459	1.495800
70	0.38951290	8.78924660	3.42352493		70.00000000	0.49057143	4.31175326	1.517269
71	0.39931932	8.79980750	3.51393315		71.00000000	0.48366197	4.25613225	1.538644
72	0.40947035	8.79036520	3.59939392		72.00000000	0.47694444	4.19251585	1.560028
73	0.41931176	8.78331760	3.68294836		73.00000000	0.47041096	4.13176885	1.581514
74	0.42945534	8.78696540	3.77360921		74.00000000	0.46405405	4.07762692	1.602885
75	0.43929005	8.77774330	3.85597529		75.00000000	0.45786667	4.01903607	1.624243
76	0.44943586	8.77639200	3.94442529		76.00000000	0.45184211	3.96554344	1.645610
77	0.45957869	8.76416870	4.02782517		77.00000000	0.44597403	3.90859160	1.667091
78	0.46942309	8.75253010	4.10863972		78.00000000	0.44025641	3.85335748	1.688485
79	0.47957188	8.74424650	4.19349473		79.00000000	0.43468354	3.80098006	1.709830
80	0.48937458	8.72366910	4.26914190		80.00000000	0.42925000	3.74463496	1.731201
81	0.49950254	8.69258500	4.34196829		81.00000000	0.42395062	3.68522678	1.752690
82	0.50933278	8.65810680	4.40985761		82.00000000	0.41878049	3.62584619	1.774069
83	0.51947415	8.59557820	4.46518068		83.00000000	0.41373494	3.55629103	1.795414
84	0.52924484	8.52196120	4.51020399		84.00000000	0.40880952	3.48385890	1.816789
85	0.53936905	8.40409660	4.53290960		85.00000000	0.40400000	3.39525503	1.838269
86	0.54955208	8.25410370	4.53605986		86.00000000	0.39930233	3.29588280	1.859637
87	0.55932724	8.02928730	4.49099910		87.00000000	0.39471264	3.16926122	1.880998
88	0.56944704	7.72031210	4.39630887		88.00000000	0.39022727	3.01267634	1.902375
89	0.57925493	7.30371810	4.23071472		89.00000000	0.38584270	2.81808629	1.923855
90	0.58937472	6.75753120	3.98271806		90.00000000	0.38155556	2.57837357	1.945242
91	0.59917516	6.04761700	3.62358188		91.00000000	0.37736264	2.28214470	1.966592
92	0.60930687	5.12800790	3.12453044		92.00000000	0.37326087	1.91408469	1.988070
93	0.61907011	4.02185490	2.48981016		93.00000000	0.36924731	1.48505911	2.009574
94	0.62923157	2.62180540	1.64972273		94.00000000	0.36531915	0.95779572	2.031004
95	0.63925976	0.97536719	0.62351300		95.00000000	0.36147368	0.35256957	2.052387
96	0.64904237	-0.87624037	-0.56871713		96.00000000	0.35770833	-0.31343848	2.073767
97	0.65912271	-3.07561850	-2.02721000		97.00000000	0.35402062	-1.08883236	2.095252
98	0.66889191	-5.50599380	-3.68291471		98.00000000	0.35040816	-1.92934517	2.116641
99	0.67912334	-8.37718870	-5.68914437		99.00000000	0.34686869	-2.90578444	2.138021
100	0.68440241	-9.99846170	-6.84297128		100.00000000	0.34340000	-3.43347175	2.159362
101	0.68439943	-10.00017700	-6.84411544		101.00000000	0.34000000	-3.40006018	2.180823
20:55 02/04/2018
Test Lot:	JK-PERC
Recipe:	Recipe_YJX-LID
Cell Name:	1-2-6h
Test Order:	3
Test Condition:	Light
1	-0.29986811	8.80318160	-2.63979343		1.00000000	34.34000000	302.30125614	0.000000
2	-0.29009935	8.81327150	-2.55672433		2.00000000	17.17000000	151.32387166	0.061756
3	-0.27992275	8.80542950	-2.46484004		3.00000000	11.44666667	100.79281634	0.083293
4	-0.27011532	8.80645080	-2.37875728		4.00000000	8.58500000	75.60338012	0.104675
5	-0.25998187	8.79671670	-2.28698686		5.00000000	6.86800000	60.41585030	0.126033
6	-0.24977550	8.81721500	-2.20232429		6.00000000	5.72333333	50.46386052	0.147412
7	-0.23999709	8.80006600	-2.11199023		7.00000000	4.90571429	43.17060949	0.168890
8	-0.22983313	8.80571170	-2.02384428		8.00000000	4.29250000	37.79851747	0.190275
9	-0.21998550	8.79965400	-1.93579629		9.00000000	3.81555556	33.57556871	0.211631
10	-0.20984238	8.80530640	-1.84772645		10.00000000	3.43400000	30.23742218	0.233003
11	-0.20003420	8.80960660	-1.76222261		11.00000000	3.12181818	27.50199006	0.254492
12	-0.18989852	8.80670640	-1.67238051		12.00000000	2.86166667	25.20185815	0.275866
13	-0.18012533	8.80999090	-1.58690252		13.00000000	2.64153846	23.27192981	0.297236
14	-0.16995691	8.80417440	-1.49633028		14.00000000	2.45285714	21.59538206	0.318634
15	-0.16014798	8.80834670	-1.41063893		15.00000000	2.28933333	20.16524171	0.340119
16	-0.14999147	8.81701660	-1.32247728		16.00000000	2.14625000	18.92352188	0.361507
17	-0.13982452	8.78279690	-1.22805036		17.00000000	2.02000000	17.74124974	0.382846
18	-0.12998806	8.80519100	-1.14456970		18.00000000	1.90777778	16.79834772	0.404209
19	-0.11988068	8.81303790	-1.05651298		19.00000000	1.80736842	15.92840639	0.425677
20	-0.11002411	8.80485060	-0.96874585		20.00000000	1.71700000	15.11792848	0.447053
21	-0.09987058	8.80080030	-0.87894100		21.00000000	1.63523810	14.39140392	0.468434
22	-0.09007430	8.80441860	-0.79305185		22.00000000	1.56090909	13.74289703	0.489784
23	-0.07991035	8.79650780	-0.70293197		23.00000000	1.49304348	13.13356860	0.511258
24	-0.07010365	8.80369570	-0.61717116		24.00000000	1.43083333	12.59662126	0.532640
25	-0.05995607	8.80749700	-0.52806287		25.00000000	1.37360000	12.09797788	0.554027
26	-0.04980179	8.80366900	-0.43843847		26.00000000	1.32076923	11.62761513	0.575506
27	-0.03995862	8.81103520	-0.35207682		27.00000000	1.27185185	11.20633144	0.596964
28	-0.02980285	8.78906820	-0.26193931		28.00000000	1.22642857	10.77916436	0.618325
29	-0.02003486	8.80184170	-0.17634366		29.00000000	1.18413793	10.42259462	0.639710
30	-0.00988207	8.81054970	-0.08706646		30.00000000	1.14466667	10.08514256	0.661064
31	-0.00064177	8.79718020	-0.00564579		31.00000000	1.10774194	9.74500542	0.682668
32	0.00949146	8.79442020	0.08347187		32.00000000	1.07312500	9.43751218	0.704051
33	0.01930457	8.81271270	0.17012566		33.00000000	1.04060606	9.17056225	0.725465
34	0.02943698	8.80609700	0.25922489		34.00000000	1.01000000	8.89415797	0.746822
35	0.03924712	8.80178640	0.34544475		35.00000000	0.98114286	8.63580986	0.768299
36	0.04938845	8.80805110	0.43501602		36.00000000	0.95388889	8.40190208	0.789694
37	0.05923730	8.80963040	0.52185870		37.00000000	0.92810811	8.17628940	0.811075
38	0.06936449	8.80095580	0.61047379		38.00000000	0.90368421	7.95328479	0.832427
39	0.07951848	8.80605030	0.70024375		39.00000000	0.88051282	7.75384019	0.853892
40	0.08935095	8.79483600	0.78582692		40.00000000	0.85850000	7.55036671	0.875265
41	0.09950196	8.81006430	0.87661867		41.00000000	0.83756098	7.37896605	0.896651
42	0.10931954	8.80889420	0.96298426		42.00000000	0.81761905	7.20231969	0.918140
43	0.11944748	8.78635980	1.04950854		43.00000000	0.79860465	7.01682780	0.939527
44	0.12929112	8.80491070	1.13839677		44.00000000	0.78045455	6.87183258	0.960894
45	0.13943319	8.79324530	1.22607024		45.00000000	0.76311111	6.71022319	0.982261
46	0.14922249	8.79865070	1.31295657		46.00000000	0.74652174	6.56838402	1.003741
47	0.15939285	8.80139640	1.40287966		47.00000000	0.73063830	6.43063728	1.025130
48	0.16956247	8.79873280	1.49193487		48.00000000	0.71541667	6.29476009	1.046481
49	0.17935327	8.80363080	1.57895997		49.00000000	0.70081633	6.16972820	1.067849
50	0.18955265	8.80816840	1.66961166		50.00000000	0.68680000	6.04945006	1.089335
51	0.19932930	8.79573730	1.75324816		51.00000000	0.67333333	5.92246312	1.110703
52	0.20944905	8.81556610	1.84641194		52.00000000	0.66038462	5.82166423	1.132051
53	0.21925250	8.78642940	1.92644661		53.00000000	0.64792453	5.69294312	1.153431
54	0.22942285	8.81871890	2.02321562		54.00000000	0.63592593	5.60805198	1.174903
55	0.23926276	8.79916950	2.10531358		55.00000000	0.62436364	5.49388147	1.196290
56	0.24941079	8.79701520	2.19407051		56.00000000	0.61321429	5.39445539	1.217638
57	0.25953874	8.80495070	2.28522581		57.00000000	0.60245614	5.30459661	1.239016
58	0.26936674	8.79770950	2.36981033		58.00000000	0.59206897	5.20885076	1.260497
59	0.27951849	8.80202010	2.46032737		59.00000000	0.58203390	5.12307407	1.281876
60	0.28932267	8.79507260	2.54461389		60.00000000	0.57233333	5.03371322	1.303219
61	0.29947072	8.80669980	2.63734873		61.00000000	0.56295082	4.95773887	1.324605
62	0.30928308	8.80226040	2.72239021		62.00000000	0.55387097	4.87531649	1.346079
63	0.31943932	8.79823490	2.81050217		63.00000000	0.54507937	4.79573629	1.367454
64	0.32926062	8.79613780	2.89622179		64.00000000	0.53656250	4.71967769	1.388827
65	0.33938557	8.79616070	2.98529001		65.00000000	0.52830769	4.64707936	1.410178
66	0.34922475	8.79677010	3.07204984		66.00000000	0.52030303	4.57698614	1.431661
67	0.35936534	8.80515290	3.16426677		67.00000000	0.51253731	4.51296941	1.453050
68	0.36950445	8.79345230	3.24921976		68.00000000	0.50500000	4.44069341	1.474436
69	0.37934732	8.79416660	3.33604353		69.00000000	0.49768116	4.37669103	1.495784
70	0.38948718	8.79463390	3.42539716		70.00000000	0.49057143	4.31439612	1.517265
71	0.39931369	8.78258800	3.50700762		71.00000000	0.48366197	4.24780383	1.538645
72	0.40947661	8.79135420	3.59985392		72.00000000	0.47694444	4.19298754	1.560027
73	0.41924655	8.78695200	3.68389931		73.00000000	0.47041096	4.13347852	1.581513
74	0.42942658	8.78281310	3.77157339		74.00000000	0.46405405	4.07570003	1.602875
75	0.43925533	8.77676010	3.85523865		75.00000000	0.45786667	4.01858589	1.624234
76	0.44939965	8.76871300	3.94065655		76.00000000	0.45184211	3.96207374	1.645612
77	0.45953950	8.74960140	4.02078745		77.00000000	0.44597403	3.90209496	1.667087
78	0.46940768	8.75245670	4.10847039		78.00000000	0.44025641	3.85332517	1.688479
79	0.47953415	8.73696520	4.18967318		79.00000000	0.43468354	3.79781500	1.709830
80	0.48936290	8.71957680	4.26703739		80.00000000	0.42925000	3.74287834	1.731201
81	0.49949008	8.69478320	4.34295796		81.00000000	0.42395062	3.68615870	1.752686
82	0.50933671	8.64932350	4.40541798		82.00000000	0.41878049	3.62216791	1.774059
83	0.51947582	8.59167960	4.46316981		83.00000000	0.41373494	3.55467804	1.795426
84	0.52926362	8.51181790	4.50499555		84.00000000	0.40880952	3.47971222	1.816806
85	0.53937072	8.41248610	4.53744868		85.00000000	0.40400000	3.39864438	1.838287
86	0.54951948	8.23971270	4.52788264		86.00000000	0.39930233	3.29013644	1.859670
87	0.55932367	8.02823930	4.49038427		87.00000000	0.39471264	3.16884756	1.881010
88	0.56944716	7.72102210	4.39671411		88.00000000	0.39022727	3.01295340	1.902368
89	0.57926619	7.30155710	4.22954516		89.00000000	0.38584270	2.81725248	1.923887
90	0.58935398	6.75925110	3.98359154		90.00000000	0.38155556	2.57902981	1.945261
91	0.59917229	6.05054280	3.62531759		91.00000000	0.37736264	2.28324879	1.966603
92	0.60928088	5.12671660	3.12361040		92.00000000	0.37326087	1.91360270	1.988081
93	0.61908507	4.00928930	2.48209115		93.00000000	0.36924731	1.48041930	2.009583
94	0.62917507	2.62037750	1.64867620		94.00000000	0.36531915	0.95727408	2.030996
95	0.63924420	0.97052503	0.62040250		95.00000000	0.36147368	0.35081926	2.052396
96	0.64902383	-0.88394016	-0.57369823		96.00000000	0.35770833	-0.31619276	2.073783
97	0.65910637	-3.08401540	-2.03269420		97.00000000	0.35402062	-1.09180504	2.095310
98	0.66882122	-5.52420950	-3.69470854		98.00000000	0.35040816	-1.93572810	2.116692
99	0.67908090	-8.38247200	-5.69237663		99.00000000	0.34686869	-2.90761706	2.138075
100	0.68429822	-9.99868490	-6.84208228		100.00000000	0.34340000	-3.43354839	2.159437
101	0.68424314	-10.00030200	-6.84263804		101.00000000	0.34000000	-3.40010268	2.180917
20:57 02/04/2018
Test Lot:	JK-PERC
Recipe:	Recipe_YJX-LID
Cell Name:	1-2-6h
Test Order:	4
Test Condition:	Light
1	-0.29987675	9.00978570	-2.70182525		1.00000000	34.34000000	309.39604094	0.000000
2	-0.29007599	9.02628040	-2.61830722		2.00000000	17.17000000	154.98123447	0.061716
3	-0.27992913	9.00729370	-2.52140389		3.00000000	11.44666667	103.10348855	0.083234
4	-0.27011573	9.01549150	-2.43522607		4.00000000	8.58500000	77.39799453	0.104623
5	-0.25994581	9.00122260	-2.33983010		5.00000000	6.86800000	61.82039682	0.125987
6	-0.24980119	9.01870920	-2.25288429		6.00000000	5.72333333	51.61707899	0.147349
7	-0.23995800	9.00530150	-2.16089414		7.00000000	4.90571429	44.17743622	0.168834
8	-0.22985135	9.01922610	-2.07308130		8.00000000	4.29250000	38.71502803	0.190269
9	-0.22000295	9.01507570	-1.98334325		9.00000000	3.81555556	34.39752217	0.211626
10	-0.20985909	9.00820830	-1.89045440		10.00000000	3.43400000	30.93418730	0.233002
11	-0.20002185	9.02108670	-1.80441445		11.00000000	3.12181818	28.16219248	0.254486
12	-0.18988319	9.01960850	-1.71267203		12.00000000	2.86166667	25.81111299	0.275860
13	-0.18009360	9.00481030	-1.62170870		13.00000000	2.64153846	23.78655275	0.297204
14	-0.16992664	9.01116090	-1.53123629		14.00000000	2.45285714	22.10309038	0.318571
15	-0.16009612	9.01558490	-1.44336016		15.00000000	2.28933333	20.63967903	0.340057
16	-0.14996862	9.00626560	-1.35065722		16.00000000	2.14625000	19.32969754	0.361442
17	-0.13981730	9.00342560	-1.25883466		17.00000000	2.02000000	18.18691971	0.382778
18	-0.13000092	9.01604840	-1.17209459		18.00000000	1.90777778	17.20061678	0.404161
19	-0.11985853	9.00866220	-1.07976501		19.00000000	1.80736842	16.28197158	0.425646
20	-0.11003172	9.00492100	-0.99082695		20.00000000	1.71700000	15.46144936	0.447021
21	-0.09988561	9.00927640	-0.89989710		21.00000000	1.63523810	14.73231198	0.468418
22	-0.09008188	9.02250860	-0.81276452		22.00000000	1.56090909	14.08331570	0.489782
23	-0.07992014	9.00151820	-0.71940262		23.00000000	1.49304348	13.43965804	0.511246
24	-0.07010673	9.01640420	-0.63211061		24.00000000	1.43083333	12.90097168	0.532622
25	-0.05993532	9.01182170	-0.54012642		25.00000000	1.37360000	12.37863829	0.554002
26	-0.04977507	8.99773980	-0.44786314		26.00000000	1.32076923	11.88393787	0.575357
27	-0.03999590	9.02071000	-0.36079140		27.00000000	1.27185185	11.47300672	0.596834
28	-0.02980514	8.99708750	-0.26815941		28.00000000	1.22642857	11.03428517	0.618213
29	-0.01998205	9.00863550	-0.18001100		29.00000000	1.18413793	10.66746700	0.639604
30	-0.00986423	9.02019600	-0.08897724		30.00000000	1.14466667	10.32511769	0.661088
31	-0.00064550	9.00521470	-0.00581285		31.00000000	1.10774194	9.97545396	0.682579
32	0.00950710	9.02390580	0.08579116		32.00000000	1.07312500	9.68377891	0.703948
33	0.01933214	9.00725360	0.17412946		33.00000000	1.04060606	9.37300269	0.725329
34	0.02946902	9.00798320	0.26545647		34.00000000	1.01000000	9.09806303	0.746812
35	0.03927918	9.01385400	0.35405678		35.00000000	0.98114286	8.84387847	0.768199
36	0.04942946	9.00760080	0.44524085		36.00000000	0.95388889	8.59225032	0.789601
37	0.05924185	9.00742720	0.53361665		37.00000000	0.92810811	8.35986622	0.810996
38	0.06935864	9.01657770	0.62537756		38.00000000	0.90368421	8.14813890	0.832480
39	0.07954241	9.01373580	0.71697430		39.00000000	0.88051282	7.93670993	0.853847
40	0.08931610	9.00586890	0.80436909		40.00000000	0.85850000	7.73153845	0.875217
41	0.09949467	9.00309850	0.89576028		41.00000000	0.83756098	7.54064396	0.896588
42	0.10931449	9.01197150	0.98513907		42.00000000	0.81761905	7.36835956	0.918069
43	0.11946627	8.99853610	1.07502154		43.00000000	0.79860465	7.18627278	0.939458
44	0.12928610	9.00603200	1.16435475		44.00000000	0.78045455	7.02879861	0.960808
45	0.13945201	9.00117400	1.25523181		45.00000000	0.76311111	6.86889589	0.982188
46	0.14929193	9.00613210	1.34454284		46.00000000	0.74652174	6.72327340	1.003681
47	0.15942062	9.00953010	1.43630487		47.00000000	0.73063830	6.58270774	1.025095
48	0.16958654	8.99565030	1.52554121		48.00000000	0.71541667	6.43563815	1.046443
49	0.17939000	9.01571180	1.61732854		49.00000000	0.70081633	6.31835802	1.067822
50	0.18955740	9.00960830	1.70783792		50.00000000	0.68680000	6.18779898	1.089304
51	0.19929759	9.00219920	1.79411661		51.00000000	0.67333333	6.06148079	1.110685
52	0.20945978	9.00571820	1.88633575		52.00000000	0.66038462	5.94723775	1.132090
53	0.21929376	9.00479700	1.97469579		53.00000000	0.64792453	5.83442885	1.153445
54	0.22943585	9.02043910	2.06961211		54.00000000	0.63592593	5.73633109	1.174916
55	0.23925941	9.00570010	2.15469849		55.00000000	0.62436364	5.62283166	1.196298
56	0.24938735	8.99977590	2.24443026		56.00000000	0.61321429	5.51879115	1.217674
57	0.25952053	9.01424120	2.33938065		57.00000000	0.60245614	5.43068496	1.239037
58	0.26938203	9.01370720	2.42813074		58.00000000	0.59206897	5.33673630	1.260511
59	0.27952710	9.00966360	2.51844514		59.00000000	0.58203390	5.24392963	1.281879
60	0.28936404	9.00745390	2.60643325		60.00000000	0.57233333	5.15526612	1.303274
61	0.29948977	8.99840070	2.69492896		61.00000000	0.56295082	5.06565705	1.324757
62	0.30928802	9.01717190	2.78890324		62.00000000	0.55387097	4.99434973	1.346136
63	0.31942117	9.00219060	2.87549025		63.00000000	0.54507937	4.90690834	1.367506
64	0.32928270	8.99949170	2.96337693		64.00000000	0.53656250	4.82878977	1.388883
65	0.33940843	9.01908110	3.06115216		65.00000000	0.52830769	4.76484992	1.410350
66	0.34922972	8.99951170	3.14289695		66.00000000	0.52030303	4.68247321	1.431728
67	0.35939416	9.00741580	3.23721264		67.00000000	0.51253731	4.61663670	1.453078
68	0.36952212	9.01300810	3.33050586		68.00000000	0.50500000	4.55156909	1.474456
69	0.37937692	8.99484250	3.41243564		69.00000000	0.49768116	4.47656364	1.495931
70	0.38952348	9.01584820	3.51188457		70.00000000	0.49057143	4.42291753	1.517303
71	0.39932024	9.01096060	3.59825895		71.00000000	0.48366197	4.35825897	1.538666
72	0.40948316	8.99970050	3.68522580		72.00000000	0.47694444	4.29235716	1.560045
73	0.41929483	9.00167470	3.77435566		73.00000000	0.47041096	4.23448643	1.581512
74	0.42940864	8.99765300	3.86366994		74.00000000	0.46405405	4.17539735	1.602901
75	0.43924037	9.00076870	3.95350097		75.00000000	0.45786667	4.12115196	1.624261
76	0.44942042	8.99978070	4.04468522		76.00000000	0.45184211	4.06647986	1.645629
77	0.45957071	8.99643330	4.13449724		77.00000000	0.44597403	4.01217558	1.667111
78	0.46943220	8.98061370	4.21578925		78.00000000	0.44025641	3.95377275	1.688497
79	0.47957060	8.97521880	4.30425107		79.00000000	0.43468354	3.90137992	1.709860
80	0.48938522	8.97855090	4.39397011		80.00000000	0.42925000	3.85404297	1.731238
81	0.49950871	8.95854850	4.47487300		81.00000000	0.42395062	3.79798217	1.752708
82	0.50935012	8.92813680	4.54754755		82.00000000	0.41878049	3.73892948	1.774091
83	0.51947731	8.91983410	4.63365142		83.00000000	0.41373494	3.69044702	1.795453
84	0.52926069	8.86557670	4.69220124		84.00000000	0.40880952	3.62433219	1.816813
85	0.53940946	8.80884740	4.75157562		85.00000000	0.40400000	3.55877435	1.838293
86	0.54953146	8.72605900	4.79524394		86.00000000	0.39930233	3.48433565	1.859691
87	0.55934459	8.60851480	4.81512618		87.00000000	0.39471264	3.39788963	1.881074
88	0.56950235	8.45086770	4.81278901		88.00000000	0.39022727	3.29775905	1.902430
89	0.57932591	8.22166920	4.76302599		89.00000000	0.38584270	3.17227101	1.923898
90	0.58942556	7.93128200	4.67490033		90.00000000	0.38155556	3.02622471	1.945278
91	0.59923202	7.53523870	4.51535631		91.00000000	0.37736264	2.84351755	1.966665
92	0.60932422	7.00468250	4.26812270		92.00000000	0.37326087	2.61457388	1.988233
93	0.61914557	6.34203240	3.92664127		93.00000000	0.36924731	2.34177842	2.009633
94	0.62924075	5.46912000	3.44139317		94.00000000	0.36531915	1.99797426	2.031001
95	0.63935012	4.37024310	2.79411545		95.00000000	0.36147368	1.57972787	2.052379
96	0.64911115	3.10746030	2.01708713		96.00000000	0.35770833	1.11156444	2.073868
97	0.65925843	1.48432030	0.97855067		97.00000000	0.35402062	0.52547999	2.095251
98	0.66895247	-0.34714600	-0.23222417		98.00000000	0.35040816	-0.12164279	2.116595
99	0.67908567	-2.54735800	-1.72987431		99.00000000	0.34686869	-0.88359872	2.137965
100	0.68884522	-5.02673670	-3.46264355		100.00000000	0.34340000	-1.72618138	2.159448
101	0.69905800	-7.96402550	-5.56731574		101.00000000	0.34000000	-2.70776867	2.180807
