# Supplementary material for: Study on the Electrical Injection Regeneration of Industrialized B-Doped Czochralski Silicon PERC Solar Cells
Source: Hindawi journal article supplement (doi:10.1155/2019/5357370), 2019-06-20
Supplement: f1 [file 5357370.f1.zip › section3.2/IVRawData_1-2-8h.csv]

22:58 02/04/2018
Test Lot:	JK-PERC
Recipe:	Recipe_YJX-LID
Cell Name:	1-2-8h
Test Order:	2
Test Condition:	Light
1	-0.29981351	8.79510020	-2.63688986		1.00000000	34.34000000	302.02374087	0.000000
2	-0.28997833	8.78793530	-2.54831080		2.00000000	17.17000000	150.88884910	0.061720
3	-0.27990124	8.77766900	-2.45688044		3.00000000	11.44666667	100.47505115	0.083240
4	-0.27004820	8.79683880	-2.37557048		4.00000000	8.58500000	75.52086110	0.104636
5	-0.25989145	8.77735330	-2.28115908		5.00000000	6.86800000	60.28286246	0.125987
6	-0.24974366	8.81283090	-2.20094864		6.00000000	5.72333333	50.43876885	0.147368
7	-0.23991889	8.78742980	-2.10827040		7.00000000	4.90571429	43.10861990	0.168844
8	-0.22975770	8.78627680	-2.01871475		8.00000000	4.29250000	37.71509316	0.190225
9	-0.21995229	8.78374670	-1.93200520		9.00000000	3.81555556	33.51487352	0.211644
10	-0.20980002	8.79546360	-1.84528844		10.00000000	3.43400000	30.20362200	0.233033
11	-0.19997004	8.78476140	-1.75668909		11.00000000	3.12181818	27.42442786	0.254516
12	-0.18979992	8.79963590	-1.67017019		12.00000000	2.86166667	25.18162473	0.275897
13	-0.18003097	8.78039740	-1.58074346		13.00000000	2.64153846	23.19375744	0.297260
14	-0.16990624	8.78053090	-1.49186699		14.00000000	2.45285714	21.53738794	0.318632
15	-0.16007106	8.78745460	-1.40661717		15.00000000	2.28933333	20.11741273	0.340111
16	-0.14991954	8.78217790	-1.31662007		16.00000000	2.14625000	18.84874932	0.361494
17	-0.13976280	8.79468920	-1.22917039		17.00000000	2.02000000	17.76527218	0.382833
18	-0.12994623	8.79093650	-1.14234906		18.00000000	1.90777778	16.77115330	0.404210
19	-0.11978726	8.78530690	-1.05236784		19.00000000	1.80736842	15.87828626	0.425681
20	-0.10996473	8.78865810	-0.96644242		20.00000000	1.71700000	15.09012596	0.447108
21	-0.09985266	8.78735160	-0.87744042		21.00000000	1.63523810	14.36941209	0.468499
22	-0.09001152	8.78283880	-0.79055663		22.00000000	1.56090909	13.70921293	0.489840
23	-0.07983320	8.79139330	-0.70184508		23.00000000	1.49304348	13.12593243	0.511311
24	-0.07003225	8.79018690	-0.61559653		24.00000000	1.43083333	12.57729242	0.532677
25	-0.05988073	8.78897670	-0.52629034		25.00000000	1.37360000	12.07253840	0.554054
26	-0.04974335	8.78519060	-0.43700485		26.00000000	1.32076923	11.60320943	0.575449
27	-0.03994017	8.78260900	-0.35077887		27.00000000	1.27185185	11.17017752	0.596918
28	-0.02980651	8.79802230	-0.26223837		28.00000000	1.22642857	10.79014592	0.618293
29	-0.01995941	8.77701280	-0.17518403		29.00000000	1.18413793	10.39319378	0.639679
30	-0.00982725	8.79519180	-0.08643254		30.00000000	1.14466667	10.06756288	0.661149
31	-0.00064332	8.77095030	-0.00564255		31.00000000	1.10774194	9.71594946	0.682639
32	0.00948864	8.78730490	0.08337954		32.00000000	1.07312500	9.42987657	0.704007
33	0.01934439	8.79685690	0.17016980		33.00000000	1.04060606	9.15406260	0.725388
34	0.02947329	8.78665730	0.25897166		34.00000000	1.01000000	8.87452387	0.746860
35	0.03928959	8.78396510	0.34511839		35.00000000	0.98114286	8.61832462	0.768247
36	0.04944008	8.79901700	0.43502406		36.00000000	0.95388889	8.39328455	0.789601
37	0.05926531	8.77906230	0.52029383		37.00000000	0.92810811	8.14791890	0.810977
38	0.06941059	8.80099580	0.61088227		38.00000000	0.90368421	7.95332094	0.832461
39	0.07955288	8.77545740	0.69811292		39.00000000	0.88051282	7.72690275	0.853836
40	0.08939076	8.78999520	0.78574437		40.00000000	0.85850000	7.54621088	0.875195
41	0.09951520	8.78767200	0.87450694		41.00000000	0.83756098	7.36021113	0.896570
42	0.10935085	8.78240490	0.96036344		42.00000000	0.81761905	7.18066153	0.918054
43	0.11948869	8.79427530	1.05081644		43.00000000	0.79860465	7.02314916	0.939437
44	0.12935485	8.78415580	1.13627316		44.00000000	0.78045455	6.85563432	0.960789
45	0.13949493	8.78354840	1.22526047		45.00000000	0.76311111	6.70282338	0.982166
46	0.14930452	8.79803850	1.31358692		46.00000000	0.74652174	6.56792700	1.003646
47	0.15946394	8.80217930	1.40363019		47.00000000	0.73063830	6.43120930	1.025025
48	0.16961071	8.79226300	1.49126197		48.00000000	0.71541667	6.29013149	1.046387
49	0.17942774	8.77229880	1.57399375		49.00000000	0.70081633	6.14777022	1.067762
50	0.18955590	8.79497340	1.66713910		50.00000000	0.68680000	6.04038773	1.089275
51	0.19934317	8.78384690	1.75099989		51.00000000	0.67333333	5.91445691	1.110657
52	0.20948325	8.78331280	1.83995691		52.00000000	0.66038462	5.80036465	1.132042
53	0.21929583	8.78398700	1.92629172		53.00000000	0.64792453	5.69136063	1.153382
54	0.22945747	8.79137990	2.01724779		54.00000000	0.63592593	5.59066640	1.174853
55	0.23927675	8.77670960	2.10006255		55.00000000	0.62436364	5.47985832	1.196228
56	0.24941161	8.79124450	2.19263844		56.00000000	0.61321429	5.39091672	1.217609
57	0.25956136	8.77731040	2.27825062		57.00000000	0.60245614	5.28794455	1.238987
58	0.26939550	8.78533740	2.36673036		58.00000000	0.59206897	5.20152563	1.260466
59	0.27954301	8.78220840	2.45500497		59.00000000	0.58203390	5.11154299	1.281828
60	0.28935263	8.78467660	2.54186928		60.00000000	0.57233333	5.02776324	1.303228
61	0.29950610	8.78214450	2.63030585		61.00000000	0.56295082	4.94391544	1.324711
62	0.30931568	8.77761550	2.71505411		62.00000000	0.55387097	4.86166639	1.346079
63	0.31945351	8.78036590	2.80491871		63.00000000	0.54507937	4.78599627	1.367435
64	0.32927206	8.79163840	2.89484089		64.00000000	0.53656250	4.71726348	1.388807
65	0.33942553	8.76994900	2.97674459		65.00000000	0.52830769	4.63323152	1.410303
66	0.34927607	8.78808210	3.06946678		66.00000000	0.52030303	4.57246575	1.431681
67	0.35942209	8.78060910	3.15594487		67.00000000	0.51253731	4.50038980	1.453034
68	0.36958820	8.76260470	3.23855530		68.00000000	0.50500000	4.42511537	1.474421
69	0.37938961	8.80051520	3.33882403		69.00000000	0.49768116	4.37985061	1.495898
70	0.38954011	8.76044650	3.41254529		70.00000000	0.49057143	4.29762475	1.517272
71	0.39934820	8.78483010	3.50820609		71.00000000	0.48366197	4.24888825	1.538639
72	0.40951729	8.76289650	3.58855763		72.00000000	0.47694444	4.17941480	1.560013
73	0.41929489	8.78182790	3.68217556		73.00000000	0.47041096	4.13106808	1.581485
74	0.42943868	8.76883890	3.76567860		74.00000000	0.46405405	4.06921524	1.602869
75	0.43929294	8.76173500	3.84896833		75.00000000	0.45786667	4.01170640	1.624209
76	0.44942409	8.75324250	3.93391805		76.00000000	0.45184211	3.95508352	1.645571
77	0.45960432	8.75368120	4.02322970		77.00000000	0.44597403	3.90391445	1.667040
78	0.46947125	8.73916720	4.10278775		78.00000000	0.44025641	3.84747438	1.688423
79	0.47960535	8.73339180	4.18858143		79.00000000	0.43468354	3.79626170	1.709788
80	0.48943061	8.70166400	4.25886072		80.00000000	0.42925000	3.73518927	1.731161
81	0.49955428	8.67626760	4.33426661		81.00000000	0.42395062	3.67830900	1.752636
82	0.50936311	8.63307480	4.39736983		82.00000000	0.41878049	3.61536328	1.774023
83	0.51947492	8.58696370	4.46071228		83.00000000	0.41373494	3.55272691	1.795432
84	0.52928603	8.50195690	4.49996701		84.00000000	0.40880952	3.47568095	1.816787
85	0.53942084	8.39375970	4.52776891		85.00000000	0.40400000	3.39107892	1.838256
86	0.54953414	8.24083140	4.52861820		86.00000000	0.39930233	3.29058314	1.859626
87	0.55935043	8.01534940	4.48338913		87.00000000	0.39471264	3.16375975	1.881010
88	0.56946224	7.71987150	4.39617532		88.00000000	0.39022727	3.01250440	1.902378
89	0.57926810	7.31516310	4.23744063		89.00000000	0.38584270	2.82250226	1.923860
90	0.58938807	6.75807620	3.98312949		90.00000000	0.38155556	2.57858152	1.945234
91	0.59920663	6.05367520	3.62740232		91.00000000	0.37736264	2.28443084	1.966627
92	0.60932434	5.14749770	3.13649564		92.00000000	0.37326087	1.92135947	1.988163
93	0.61908782	4.03755620	2.49960187		93.00000000	0.36924731	1.49085677	2.009579
94	0.62918544	2.64017270	1.66115822		94.00000000	0.36531915	0.96450564	2.030929
95	0.63926595	0.99987811	0.63918803		95.00000000	0.36147368	0.36142962	2.052308
96	0.64903092	-0.87399763	-0.56725149		96.00000000	0.35770833	-0.31263624	2.073798
97	0.65915757	-3.07289810	-2.02552404		97.00000000	0.35402062	-1.08786929	2.095169
98	0.66888678	-5.52710630	-3.69700834		98.00000000	0.35040816	-1.93674317	2.116508
99	0.67912066	-8.42161560	-5.71929314		99.00000000	0.34686869	-2.92119474	2.137883
100	0.68421155	-9.99895570	-6.84140098		100.00000000	0.34340000	-3.43364139	2.159392
101	0.68421006	-10.00020700	-6.84224223		101.00000000	0.34000000	-3.40007038	2.180775
22:59 02/04/2018
Test Lot:	JK-PERC
Recipe:	Recipe_YJX-LID
Cell Name:	1-2-8h
Test Order:	3
Test Condition:	Light
1	-0.29983148	8.79791930	-2.63789316		1.00000000	34.34000000	302.12054876	0.000000
2	-0.29002813	8.79687120	-2.55134010		2.00000000	17.17000000	151.04227850	0.061716
3	-0.27987346	8.78601550	-2.45897256		3.00000000	11.44666667	100.57059076	0.083097
4	-0.27004778	8.78340050	-2.37193781		4.00000000	8.58500000	75.40549329	0.104604
5	-0.25990054	8.78064730	-2.28209497		5.00000000	6.86800000	60.30548566	0.126045
6	-0.24974735	8.80686760	-2.19949184		6.00000000	5.72333333	50.40463890	0.147443
7	-0.23993953	8.78766440	-2.10850807		7.00000000	4.90571429	43.10977079	0.168806
8	-0.22976029	8.78259470	-2.01789151		8.00000000	4.29250000	37.69928775	0.190289
9	-0.21994056	8.81098080	-1.93789205		9.00000000	3.81555556	33.61878674	0.211683
10	-0.20981343	8.77550700	-1.84121922		10.00000000	3.43400000	30.13509104	0.233072
11	-0.19999072	8.80615330	-1.76114894		11.00000000	3.12181818	27.49120948	0.254474
12	-0.18984275	8.78962040	-1.66864571		12.00000000	2.86166667	25.15296371	0.275945
13	-0.18008256	8.79049300	-1.58301448		13.00000000	2.64153846	23.22042536	0.297325
14	-0.16995022	8.79619500	-1.49491528		14.00000000	2.45285714	21.57580974	0.318722
15	-0.16010219	8.79456140	-1.40802854		15.00000000	2.28933333	20.13368257	0.340078
16	-0.14998250	8.78144650	-1.31706330		16.00000000	2.14625000	18.84717955	0.361565
17	-0.13980401	8.79788400	-1.22997946		17.00000000	2.02000000	17.77172568	0.382941
18	-0.12998874	8.77662850	-1.14086288		18.00000000	1.90777778	16.74385682	0.404302
19	-0.11985268	8.79295920	-1.05385973		19.00000000	1.80736842	15.89211679	0.425670
20	-0.11001880	8.78378960	-0.96638199		20.00000000	1.71700000	15.08176674	0.447144
21	-0.09986190	8.78249740	-0.87703686		21.00000000	1.63523810	14.36147432	0.468530
22	-0.09005036	8.79229830	-0.79174958		22.00000000	1.56090909	13.72397835	0.489918
23	-0.07991801	8.79383750	-0.70278595		23.00000000	1.49304348	13.12958173	0.511257
24	-0.07008786	8.77709770	-0.61516798		24.00000000	1.43083333	12.55856396	0.532725
25	-0.05993765	8.80336090	-0.52765275		25.00000000	1.37360000	12.09229653	0.554103
26	-0.04977032	8.79092500	-0.43752713		26.00000000	1.32076923	11.61078325	0.575481
27	-0.03996026	8.78921790	-0.35121944		27.00000000	1.27185185	11.17858306	0.596980
28	-0.02981675	8.78690150	-0.26199688		28.00000000	1.22642857	10.77650705	0.618368
29	-0.01997023	8.80662730	-0.17587033		29.00000000	1.18413793	10.42826143	0.639719
30	-0.00983490	8.77182580	-0.08627007		30.00000000	1.14466667	10.04081660	0.661107
31	-0.00066124	8.81096270	-0.00582612		31.00000000	1.10774194	9.76027287	0.682690
32	0.00950291	8.79354000	0.08356419		32.00000000	1.07312500	9.43656761	0.704078
33	0.01930375	8.79246520	0.16972757		33.00000000	1.04060606	9.14949257	0.725434
34	0.02944623	8.78815170	0.25877791		34.00000000	1.01000000	8.87603322	0.746810
35	0.03928578	8.79182620	0.34539371		35.00000000	0.98114286	8.62603748	0.768288
36	0.04943644	8.77428910	0.43376961		36.00000000	0.95388889	8.36969688	0.789657
37	0.05924622	8.78265760	0.52033923		37.00000000	0.92810811	8.15125573	0.811022
38	0.06939167	8.78401280	0.60953730		38.00000000	0.90368421	7.93797367	0.832406
39	0.07953117	8.78929330	0.69902278		39.00000000	0.88051282	7.73908543	0.853885
40	0.08937518	8.78642270	0.78528814		40.00000000	0.85850000	7.54314389	0.875264
41	0.09949979	8.78661630	0.87426649		41.00000000	0.83756098	7.35932692	0.896627
42	0.10931478	8.78170300	0.95996993		42.00000000	0.81761905	7.18008764	0.918009
43	0.11947140	8.79756360	1.05105724		43.00000000	0.79860465	7.02577521	0.939489
44	0.12929308	8.78744600	1.13615596		44.00000000	0.78045455	6.85820217	0.960881
45	0.13944077	8.78949360	1.22561376		45.00000000	0.76311111	6.70736023	0.982230
46	0.14926618	8.78874870	1.31186295		46.00000000	0.74652174	6.56099196	1.003607
47	0.15938187	8.79101370	1.40112820		47.00000000	0.73063830	6.42305129	1.025100
48	0.16953774	8.78779130	1.48986228		48.00000000	0.71541667	6.28693236	1.046470
49	0.17934752	8.78437040	1.57545505		49.00000000	0.70081633	6.15623019	1.067840
50	0.18950041	8.79334640	1.66634275		50.00000000	0.68680000	6.03927031	1.089205
51	0.19928934	8.79179480	1.75211098		51.00000000	0.67333333	5.91980850	1.110670
52	0.20947498	8.79078200	1.84144888		52.00000000	0.66038462	5.80529719	1.132058
53	0.21929370	8.78244400	1.92593464		53.00000000	0.64792453	5.69036089	1.153443
54	0.22940342	8.77448080	2.01289590		54.00000000	0.63592593	5.57991983	1.174784
55	0.23922808	8.79906080	2.10498242		55.00000000	0.62436364	5.49381360	1.196243
56	0.24938768	8.78132920	2.18995532		56.00000000	0.61321429	5.38483651	1.217622
57	0.25952345	8.78112890	2.27890887		57.00000000	0.60245614	5.29024503	1.239009
58	0.26934960	8.79542060	2.36904302		58.00000000	0.59206897	5.20749558	1.260501
59	0.27947721	8.77901840	2.45353557		59.00000000	0.58203390	5.10968630	1.281873
60	0.28934428	8.78439710	2.54171505		60.00000000	0.57233333	5.02760327	1.303220
61	0.29945251	8.78214360	2.62983494		61.00000000	0.56295082	4.94391494	1.324602
62	0.30931291	8.78173830	2.71630503		62.00000000	0.55387097	4.86394989	1.346088
63	0.31945613	8.78656100	2.80692077		63.00000000	0.54507937	4.78937309	1.367477
64	0.32927707	8.77362820	2.88895459		64.00000000	0.53656250	4.70759988	1.388828
65	0.33941433	8.78004260	2.98007228		65.00000000	0.52830769	4.63856404	1.410204
66	0.34927100	8.78884220	3.06968770		66.00000000	0.52030303	4.57286123	1.431669
67	0.35939562	8.77191070	3.15258628		67.00000000	0.51253731	4.49593154	1.453048
68	0.36956340	8.77578070	3.24320735		68.00000000	0.50500000	4.43176925	1.474399
69	0.37935904	8.78526310	3.33276898		69.00000000	0.49768116	4.37225993	1.495771
70	0.38953874	8.76502320	3.41431609		70.00000000	0.49057143	4.29986995	1.517252
71	0.39935446	8.78658290	3.50896107		71.00000000	0.48366197	4.24973601	1.538619
72	0.40949991	8.77824400	3.59469013		72.00000000	0.47694444	4.18673471	1.559974
73	0.41933724	8.77009870	3.67762898		73.00000000	0.47041096	4.12555054	1.581344
74	0.42946109	8.76290890	3.76332841		74.00000000	0.46405405	4.06646340	1.602820
75	0.43927905	8.75764080	3.84704813		75.00000000	0.45786667	4.00983180	1.624206
76	0.44942003	8.77168370	3.94217035		76.00000000	0.45184211	3.96341603	1.645551
77	0.45958561	8.74623970	4.01964591		77.00000000	0.44597403	3.90059573	1.666921
78	0.46943036	8.74008850	4.10286289		78.00000000	0.44025641	3.84787999	1.688397
79	0.47958475	8.72086050	4.18239170		79.00000000	0.43468354	3.79081455	1.709790
80	0.48938632	8.71081260	4.26295252		80.00000000	0.42925000	3.73911631	1.731162
81	0.49945512	8.67267130	4.33161008		81.00000000	0.42395062	3.67678435	1.752525
82	0.50929320	8.63678740	4.39865709		82.00000000	0.41878049	3.61691804	1.774007
83	0.51946318	8.59880830	4.46676430		83.00000000	0.41373494	3.55762743	1.795384
84	0.52925509	8.50610450	4.50189910		84.00000000	0.40880952	3.47737653	1.816821
85	0.53936630	8.38508890	4.52263438		85.00000000	0.40400000	3.38757592	1.838188
86	0.54950655	8.24310490	4.52964013		86.00000000	0.39930233	3.29149096	1.859660
87	0.55930591	8.03283600	4.49281265		87.00000000	0.39471264	3.17066193	1.881036
88	0.56946403	7.72955990	4.40170633		88.00000000	0.39022727	3.01628508	1.902414
89	0.57921648	7.32578520	4.24321552		89.00000000	0.38584270	2.82660072	1.923903
90	0.58936566	6.77118680	3.99070498		90.00000000	0.38155556	2.58358394	1.945265
91	0.59916133	6.08504630	3.64592443		91.00000000	0.37736264	2.29626912	1.966626
92	0.60928738	5.15070150	3.13825742		92.00000000	0.37326087	1.92255532	1.988107
93	0.61906743	4.05394740	2.50966680		93.00000000	0.36924731	1.49690918	2.009600
94	0.62920094	2.65226200	1.66880574		94.00000000	0.36531915	0.96892210	2.031002
95	0.63924074	0.98471731	0.62947142		95.00000000	0.36147368	0.35594939	2.052344
96	0.64901555	-0.88168347	-0.57222628		96.00000000	0.35770833	-0.31538552	2.073711
97	0.65911704	-3.11319350	-2.05195888		97.00000000	0.35402062	-1.10213469	2.095201
98	0.66883826	-5.59032340	-3.73902218		98.00000000	0.35040816	-1.95889495	2.116632
99	0.67912441	-8.52967550	-5.79271084		99.00000000	0.34686869	-2.95867734	2.137990
100	0.68378365	-9.99962710	-6.83758152		100.00000000	0.34340000	-3.43387195	2.159373
101	0.68376952	-10.00033700	-6.83792563		101.00000000	0.34000000	-3.40011458	2.180857
22:59 02/04/2018
Test Lot:	JK-PERC
Recipe:	Recipe_YJX-LID
Cell Name:	1-2-8h
Test Order:	4
Test Condition:	Light
1	-0.29978895	8.78306580	-2.63306607		1.00000000	34.34000000	301.61047957	0.000000
2	-0.29002815	8.79300980	-2.55022037		2.00000000	17.17000000	150.97597827	0.061799
3	-0.27992946	8.78964710	-2.46048117		3.00000000	11.44666667	100.61216047	0.083209
4	-0.27003545	8.78694920	-2.37278778		4.00000000	8.58500000	75.43595888	0.104704
5	-0.25989807	8.78083610	-2.28212236		5.00000000	6.86800000	60.30678233	0.126074
6	-0.24978969	8.78296850	-2.19389498		6.00000000	5.72333333	50.26785638	0.147426
7	-0.23991279	8.80314830	-2.11198787		7.00000000	4.90571429	43.18573037	0.168808
8	-0.22979325	8.77765180	-2.01704513		8.00000000	4.29250000	37.67807035	0.190282
9	-0.21997739	8.79041860	-1.93369334		9.00000000	3.81555556	33.54033052	0.211719
10	-0.20982212	8.78486920	-1.84325988		10.00000000	3.43400000	30.16724083	0.233089
11	-0.20001370	8.78772450	-1.75766529		11.00000000	3.12181818	27.43367812	0.254471
12	-0.18983686	8.78293700	-1.66732518		12.00000000	2.86166667	25.13383805	0.276006
13	-0.18007608	8.77985100	-1.58104115		13.00000000	2.64153846	23.19231410	0.297388
14	-0.16991857	8.79040340	-1.49365278		14.00000000	2.45285714	21.56160377	0.318769
15	-0.16008633	8.79449840	-1.40787897		15.00000000	2.28933333	20.13353834	0.340114
16	-0.14991395	8.78205590	-1.31655269		16.00000000	2.14625000	18.84848748	0.361585
17	-0.13976464	8.79106430	-1.22867994		17.00000000	2.02000000	17.75794989	0.382950
18	-0.12996069	8.78391460	-1.14156360		18.00000000	1.90777778	16.75775708	0.404338
19	-0.11980617	8.78410530	-1.05239001		19.00000000	1.80736842	15.87611453	0.425756
20	-0.11001933	8.79383750	-0.96749211		20.00000000	1.71700000	15.09901899	0.447223
21	-0.09982686	8.79193500	-0.87767124		21.00000000	1.63523810	14.37690704	0.468617
22	-0.08999983	8.78104110	-0.79029222		22.00000000	1.56090909	13.70640688	0.489992
23	-0.07986838	8.79347040	-0.70232027		23.00000000	1.49304348	13.12903363	0.511331
24	-0.07004731	8.77723310	-0.61482158		24.00000000	1.43083333	12.55875769	0.532809
25	-0.05989428	8.78673360	-0.52627507		25.00000000	1.37360000	12.06945727	0.554197
26	-0.04973455	8.79025840	-0.43717953		26.00000000	1.32076923	11.60990283	0.575564
27	-0.03992315	8.78444860	-0.35070289		27.00000000	1.27185185	11.17251722	0.596933
28	-0.02978129	8.77888680	-0.26144654		28.00000000	1.22642857	10.76667760	0.618415
29	-0.01996840	8.79071240	-0.17553648		29.00000000	1.18413793	10.40941599	0.639794
30	-0.00981611	8.78075890	-0.08619293		30.00000000	1.14466667	10.05104202	0.661176
31	-0.00064258	8.79329680	-0.00565044		31.00000000	1.10774194	9.74070362	0.682642
32	0.00948791	8.78649520	0.08336548		32.00000000	1.07312500	9.42900766	0.704118
33	0.01930573	8.78703210	0.16964003		33.00000000	1.04060606	9.14383886	0.725497
34	0.02944656	8.78910640	0.25880894		34.00000000	1.01000000	8.87699746	0.746871
35	0.03926586	8.77650830	0.34461718		35.00000000	0.98114286	8.61100843	0.768368
36	0.04941563	8.78509620	0.43412103		36.00000000	0.95388889	8.38000565	0.789737
37	0.05923493	8.77976420	0.52006874		37.00000000	0.92810811	8.14857034	0.811084
38	0.06938469	8.78862570	0.60979610		38.00000000	0.90368421	7.94214228	0.832472
39	0.07954042	8.78151040	0.69848500		39.00000000	0.88051282	7.73223249	0.853943
40	0.08935525	8.78585240	0.78506206		40.00000000	0.85850000	7.54265429	0.875315
41	0.09948567	8.78337570	0.87381998		41.00000000	0.83756098	7.35661272	0.896669
42	0.10933027	8.78343770	0.96029562		42.00000000	0.81761905	7.18150597	0.918038
43	0.11945622	8.78399850	1.04930326		43.00000000	0.79860465	7.01494206	0.939517
44	0.12929265	8.78210260	1.13546132		44.00000000	0.78045455	6.85403189	0.960899
45	0.13942529	8.78419490	1.22473892		45.00000000	0.76311111	6.70331673	0.982238
46	0.14924906	8.79475880	1.31260948		46.00000000	0.74652174	6.56547863	1.003612
47	0.15942116	8.77500530	1.39892152		47.00000000	0.73063830	6.41135494	1.025086
48	0.16956347	8.79499440	1.49130977		48.00000000	0.71541667	6.29208558	1.046479
49	0.17940436	8.77297210	1.57390944		49.00000000	0.70081633	6.14824208	1.067838
50	0.18953255	8.78795340	1.66560322		50.00000000	0.68680000	6.03556640	1.089205
51	0.19930348	8.77260680	1.74841106		51.00000000	0.67333333	5.90688858	1.110692
52	0.20946664	8.79275320	1.84178847		52.00000000	0.66038462	5.80659894	1.132065
53	0.21929859	8.78479580	1.92649333		53.00000000	0.64792453	5.69188467	1.153403
54	0.22945133	8.78188710	2.01501568		54.00000000	0.63592593	5.58462969	1.174783
55	0.23925576	8.78763480	2.10249224		55.00000000	0.62436364	5.48667962	1.196266
56	0.24942040	8.78738400	2.19175283		56.00000000	0.61321429	5.38854940	1.217646
57	0.25956422	8.77914050	2.27875076		57.00000000	0.60245614	5.28904710	1.239018
58	0.26936713	8.78209110	2.36560668		58.00000000	0.59206897	5.19960359	1.260388
59	0.27952287	8.77632140	2.45318255		59.00000000	0.58203390	5.10811656	1.281858
60	0.28933993	8.78383160	2.54151322		60.00000000	0.57233333	5.02727962	1.303258
61	0.29949862	8.77829460	2.62908712		61.00000000	0.56295082	4.94174814	1.324641
62	0.30931646	8.78641510	2.71778281		62.00000000	0.55387097	4.86654023	1.345988
63	0.31946397	8.78343770	2.80599188		63.00000000	0.54507937	4.78767064	1.367453
64	0.32927510	8.77236650	2.88852186		64.00000000	0.53656250	4.70692290	1.388834
65	0.33941072	8.78597930	2.98205556		65.00000000	0.52830769	4.64170045	1.410218
66	0.34923300	8.77903840	3.06592992		66.00000000	0.52030303	4.56776028	1.431710
67	0.35939690	8.77119540	3.15234044		67.00000000	0.51253731	4.49556493	1.453092
68	0.36953551	8.77359680	3.24215557		68.00000000	0.50500000	4.43066638	1.474437
69	0.37934735	8.77818390	3.32998080		69.00000000	0.49768116	4.36873674	1.495820
70	0.38950458	8.77567580	3.41816592		70.00000000	0.49057143	4.30509581	1.517290
71	0.39933875	8.76520060	3.50028425		71.00000000	0.48366197	4.23939421	1.538672
72	0.40949449	8.78497790	3.59740004		72.00000000	0.47694444	4.18994640	1.560030
73	0.41931006	8.75945470	3.67292748		73.00000000	0.47041096	4.12054348	1.581394
74	0.42946205	8.77211760	3.76729161		74.00000000	0.46405405	4.07073673	1.602871
75	0.43927839	8.76724620	3.85126180		75.00000000	0.45786667	4.01422979	1.624242
76	0.44938871	8.75284290	3.93342878		76.00000000	0.45184211	3.95490296	1.645595
77	0.45956451	8.74712560	4.01986849		77.00000000	0.44597403	3.90099082	1.666972
78	0.46941361	8.74655340	4.10575121		78.00000000	0.44025641	3.85072620	1.688452
79	0.47955739	8.72141740	4.18242017		79.00000000	0.43468354	3.79105663	1.709830
80	0.48935139	8.71399780	4.26420694		80.00000000	0.42925000	3.74048356	1.731194
81	0.49951309	8.67244720	4.33200090		81.00000000	0.42395062	3.67668934	1.752567
82	0.50933683	8.63225460	4.39672519		82.00000000	0.41878049	3.61501979	1.774042
83	0.51949853	8.59413530	4.46464065		83.00000000	0.41373494	3.55569405	1.795422
84	0.52925974	8.50665660	4.50223086		84.00000000	0.40880952	3.47760223	1.816776
85	0.53935593	8.38715840	4.52366362		85.00000000	0.40400000	3.38841199	1.838198
86	0.54951465	8.23277660	4.52403135		86.00000000	0.39930233	3.28736684	1.859689
87	0.55929822	8.01730250	4.48406302		87.00000000	0.39471264	3.16453066	1.881056
88	0.56945843	7.71937040	4.39586055		88.00000000	0.39022727	3.01230886	1.902426
89	0.57924867	7.31408210	4.23667233		89.00000000	0.38584270	2.82208516	1.923794
90	0.58936870	6.76368760	3.98630577		90.00000000	0.38155556	2.58072258	1.945273
91	0.59915000	6.06018450	3.63095954		91.00000000	0.37736264	2.28688721	1.966671
92	0.60927671	5.14181520	3.13278825		92.00000000	0.37326087	1.91923841	1.988143
93	0.61908710	4.02024750	2.48888337		93.00000000	0.36924731	1.48446558	2.009516
94	0.62921304	2.64268590	1.66281243		94.00000000	0.36531915	0.96542376	2.030996
95	0.63926679	0.98404950	0.62907017		95.00000000	0.36147368	0.35570800	2.052370
96	0.64900869	-0.88712144	-0.57574952		96.00000000	0.35770833	-0.31733073	2.073756
97	0.65910560	-3.09787560	-2.04182716		97.00000000	0.35402062	-1.09671184	2.095239
98	0.66882890	-5.56742140	-3.72365233		98.00000000	0.35040816	-1.95086991	2.116614
99	0.67910367	-8.47013760	-5.75210153		99.00000000	0.34686869	-2.93802551	2.137957
100	0.68401521	-9.99940490	-6.83974504		100.00000000	0.34340000	-3.43379564	2.159335
101	0.68393928	-10.00046300	-6.83970946		101.00000000	0.34000000	-3.40015742	2.180828
