# Supplementary material for: Study on the Electrical Injection Regeneration of Industrialized B-Doped Czochralski Silicon PERC Solar Cells
Source: Hindawi journal article supplement (doi:10.1155/2019/5357370), 2019-06-20
Supplement: f1 [file 5357370.f1.zip › section3.2/IVRawData_1-2-9h.csv]

23:55 02/04/2018
Test Lot:	JK-PERC
Recipe:	Recipe_YJX-LID
Cell Name:	1-2-9h
Test Order:	2
Test Condition:	Light
1	-0.29983220	8.78089810	-2.63279600		1.00000000	34.34000000	301.53604075	0.000000
2	-0.29004288	8.79658600	-2.55138714		2.00000000	17.17000000	151.03738162	0.061731
3	-0.27988887	8.78030200	-2.45750881		3.00000000	11.44666667	100.50519023	0.083229
4	-0.27007869	8.78962420	-2.37389019		4.00000000	8.58500000	75.45892376	0.104619
5	-0.25991946	8.79117300	-2.28499694		5.00000000	6.86800000	60.37777616	0.125970
6	-0.24974757	8.79174710	-2.19571747		6.00000000	5.72333333	50.31809924	0.147350
7	-0.23994486	8.78972910	-2.10905032		7.00000000	4.90571429	43.11989961	0.168846
8	-0.22981614	8.78069110	-2.01794454		8.00000000	4.29250000	37.69111655	0.190273
9	-0.21995686	8.78938580	-1.93328570		9.00000000	3.81555556	33.53638982	0.211650
10	-0.20986760	8.80604170	-1.84810284		10.00000000	3.43400000	30.23994720	0.233030
11	-0.20000385	8.78664880	-1.75736359		11.00000000	3.12181818	27.43031998	0.254505
12	-0.18987960	8.79073050	-1.66918039		12.00000000	2.86166667	25.15614045	0.275887
13	-0.18008284	8.77324680	-1.57991120		13.00000000	2.64153846	23.17486885	0.297225
14	-0.16996901	8.78669360	-1.49346561		14.00000000	2.45285714	21.55250416	0.318591
15	-0.16011196	8.77952100	-1.40570632		15.00000000	2.28933333	20.09925008	0.340076
16	-0.14999589	8.78153900	-1.31719476		16.00000000	2.14625000	18.84737808	0.361443
17	-0.13983740	8.78591440	-1.22859943		17.00000000	2.02000000	17.74754709	0.382775
18	-0.13001162	8.79900650	-1.14397309		18.00000000	1.90777778	16.78654907	0.404145
19	-0.11987545	8.78785510	-1.05344808		19.00000000	1.80736842	15.88289180	0.425628
20	-0.11007423	8.78280740	-0.96676076		20.00000000	1.71700000	15.08008031	0.447013
21	-0.09989043	8.77832600	-0.87687079		21.00000000	1.63523810	14.35465309	0.468379
22	-0.09009070	8.77798270	-0.79081460		22.00000000	1.56090909	13.70163300	0.489756
23	-0.07989425	8.77332310	-0.70093803		23.00000000	1.49304348	13.09895284	0.511233
24	-0.07010791	8.79425530	-0.61654683		24.00000000	1.43083333	12.58311363	0.532607
25	-0.05996802	8.78318410	-0.52671019		25.00000000	1.37360000	12.06458168	0.553964
26	-0.04976859	8.78696440	-0.43731485		26.00000000	1.32076923	11.60555221	0.575329
27	-0.03994728	8.77715680	-0.35062350		27.00000000	1.27185185	11.16324313	0.596811
28	-0.02979920	8.79393290	-0.26205217		28.00000000	1.22642857	10.78513056	0.618181
29	-0.01999575	8.77898880	-0.17554246		29.00000000	1.18413793	10.39553363	0.639576
30	-0.00985065	8.79145340	-0.08660155		30.00000000	1.14466667	10.06328366	0.660939
31	-0.00068508	8.78564260	-0.00601888		31.00000000	1.10774194	9.73222474	0.682520
32	0.00947172	8.77651600	0.08312867		32.00000000	1.07312500	9.41829873	0.703917
33	0.01928680	8.78651710	0.16946378		33.00000000	1.04060606	9.14330295	0.725302
34	0.02943384	8.77742000	0.25835317		34.00000000	1.01000000	8.86519420	0.746790
35	0.03923031	8.77926450	0.34441329		35.00000000	0.98114286	8.61371266	0.768176
36	0.04935800	8.78479100	0.43359974		36.00000000	0.95388889	8.37971453	0.789519
37	0.05920732	8.78835110	0.52033475		37.00000000	0.92810811	8.15653991	0.810895
38	0.06935734	8.78079130	0.60901235		38.00000000	0.90368421	7.93506245	0.832373
39	0.07951108	8.78366470	0.69839863		39.00000000	0.88051282	7.73412938	0.853760
40	0.08932839	8.77853680	0.78417259		40.00000000	0.85850000	7.53637384	0.875111
41	0.09947915	8.78737450	0.87416058		41.00000000	0.83756098	7.35996196	0.896486
42	0.10925405	8.78226660	0.95949819		42.00000000	0.81761905	7.18054845	0.917966
43	0.11942416	8.78539850	1.04918884		43.00000000	0.79860465	7.01606010	0.939349
44	0.12922882	8.78320410	1.13504310		44.00000000	0.78045455	6.85489156	0.960707
45	0.13939893	8.78850750	1.22510854		45.00000000	0.76311111	6.70660772	0.982082
46	0.14922592	8.77693270	1.30974586		46.00000000	0.74652174	6.55217106	1.003567
47	0.15940125	8.79293540	1.40160489		47.00000000	0.73063830	6.42445535	1.024953
48	0.16947758	8.78578090	1.48899289		48.00000000	0.71541667	6.28549409	1.046298
49	0.17932393	8.77554610	1.57366541		49.00000000	0.70081633	6.15004598	1.067676
50	0.18946725	8.78493310	1.66445712		50.00000000	0.68680000	6.03349205	1.089138
51	0.19927563	8.78188230	1.75001513		51.00000000	0.67333333	5.91313408	1.110520
52	0.20941672	8.78796010	1.84034578		52.00000000	0.66038462	5.80343365	1.131901
53	0.21921319	8.79133320	1.92717620		53.00000000	0.64792453	5.69612042	1.153270
54	0.22935279	8.78033920	2.01379529		54.00000000	0.63592593	5.58364534	1.174746
55	0.23919466	8.78667070	2.10172471		55.00000000	0.62436364	5.48607767	1.196126
56	0.24932235	8.78413390	2.19008091		56.00000000	0.61321429	5.38655640	1.217497
57	0.25949544	8.77427290	2.27688381		57.00000000	0.60245614	5.28611459	1.238872
58	0.26929861	8.79605770	2.36876611		58.00000000	0.59206897	5.20787278	1.260338
59	0.27948138	8.78143500	2.45424757		59.00000000	0.58203390	5.11109285	1.281720
60	0.28932551	8.78827570	2.54267235		60.00000000	0.57233333	5.02982313	1.303114
61	0.29944351	8.76487060	2.62458362		61.00000000	0.56295082	4.93419109	1.324465
62	0.30928093	8.79041670	2.71870825		62.00000000	0.55387097	4.86875660	1.345951
63	0.31942424	8.77822300	2.80397721		63.00000000	0.54507937	4.78482822	1.367334
64	0.32924825	8.77615170	2.88953259		64.00000000	0.53656250	4.70895390	1.388720
65	0.33937445	8.77993490	2.97968558		65.00000000	0.52830769	4.63850715	1.410196
66	0.34917912	8.76634410	3.06102432		66.00000000	0.52030303	4.56115540	1.431568
67	0.35933360	8.77159600	3.15192917		67.00000000	0.51253731	4.49577025	1.452919
68	0.36950818	8.78368660	3.24564405		68.00000000	0.50500000	4.43576173	1.474296
69	0.37933964	8.77920910	3.33030202		69.00000000	0.49768116	4.36924696	1.495772
70	0.38948146	8.77401920	3.41731781		70.00000000	0.49057143	4.30428313	1.517153
71	0.39926603	8.77257920	3.50259287		71.00000000	0.48366197	4.24296295	1.538518
72	0.40945104	8.76284500	3.58795600		72.00000000	0.47694444	4.17939024	1.559903
73	0.41928250	8.77391430	3.67874872		73.00000000	0.47041096	4.12734544	1.581381
74	0.42941985	8.75415520	3.75920801		74.00000000	0.46405405	4.06240121	1.602768
75	0.43922451	8.76536660	3.84996385		75.00000000	0.45786667	4.01336919	1.624114
76	0.44939536	8.74994370	3.93218410		76.00000000	0.45184211	3.95359298	1.645488
77	0.45951116	8.73811820	4.01526283		77.00000000	0.44597403	3.89697375	1.666974
78	0.46938279	8.73716550	4.10107512		78.00000000	0.44025641	3.84659312	1.688345
79	0.47951272	8.70805640	4.17562381		79.00000000	0.43468354	3.78524882	1.709767
80	0.48935756	8.69253350	4.25375698		80.00000000	0.42925000	3.73127000	1.731149
81	0.49946517	8.66948410	4.33010535		81.00000000	0.42395062	3.67543314	1.752625
82	0.50928026	8.62409590	4.39208180		82.00000000	0.41878049	3.61160309	1.774013
83	0.51945406	8.56177620	4.44744941		83.00000000	0.41373494	3.54230596	1.795357
84	0.52921408	8.48461440	4.49017740		84.00000000	0.40880952	3.46859117	1.816723
85	0.53933060	8.38710120	4.52342032		85.00000000	0.40400000	3.38838888	1.838203
86	0.54950070	8.19856360	4.50511644		86.00000000	0.39930233	3.27370551	1.859563
87	0.55930090	8.00900840	4.47944561		87.00000000	0.39471264	3.16125688	1.880911
88	0.56943160	7.69553520	4.38208092		88.00000000	0.39022727	3.00300771	1.902282
89	0.57919681	7.28186660	4.21763391		89.00000000	0.38584270	2.80965505	1.923764
90	0.58933270	6.73589560	3.96968354		90.00000000	0.38155556	2.57011839	1.945148
91	0.59912843	6.02886530	3.61206460		91.00000000	0.37736264	2.27506851	1.966540
92	0.60923821	5.10985180	3.11311696		92.00000000	0.37326087	1.90730773	1.988008
93	0.61906153	3.99922730	2.47576777		93.00000000	0.36924731	1.47670393	2.009503
94	0.62916088	2.62011740	1.64847537		94.00000000	0.36531915	0.95717906	2.030894
95	0.63919109	0.97458941	0.62294887		95.00000000	0.36147368	0.35228842	2.052274
96	0.64898980	-0.88535690	-0.57458760		96.00000000	0.35770833	-0.31669954	2.073776
97	0.65910184	-3.06377840	-2.01934198		97.00000000	0.35402062	-1.08464072	2.095158
98	0.66882318	-5.51327180	-3.68740398		98.00000000	0.35040816	-1.93189545	2.116508
99	0.67912501	-8.38890270	-5.69711363		99.00000000	0.34686869	-2.90984766	2.137894
100	0.68428224	-9.99878030	-6.84198778		100.00000000	0.34340000	-3.43358116	2.159370
101	0.68427038	-10.00050500	-6.84304936		101.00000000	0.34000000	-3.40017170	2.180749
23:55 02/04/2018
Test Lot:	JK-PERC
Recipe:	Recipe_YJX-LID
Cell Name:	1-2-9h
Test Order:	3
Test Condition:	Light
1	-0.29980808	8.78306670	-2.63323436		1.00000000	34.34000000	301.61051048	0.000000
2	-0.28997186	8.78019330	-2.54600898		2.00000000	17.17000000	150.75591896	0.061755
3	-0.27982751	8.78394130	-2.45798842		3.00000000	11.44666667	100.54684808	0.083309
4	-0.27001807	8.78219410	-2.37135110		4.00000000	8.58500000	75.39513635	0.104730
5	-0.25988710	8.78113270	-2.28210311		5.00000000	6.86800000	60.30881938	0.126080
6	-0.24969287	8.77401540	-2.19080909		6.00000000	5.72333333	50.21661481	0.147451
7	-0.23991174	8.79441830	-2.10988420		7.00000000	4.90571429	43.14290349	0.168938
8	-0.22973238	8.77693270	-2.01634564		8.00000000	4.29250000	37.67498361	0.190317
9	-0.21990807	8.79150770	-1.93332349		9.00000000	3.81555556	33.54448605	0.211680
10	-0.20978008	8.77813720	-1.84147832		10.00000000	3.43400000	30.14412314	0.233051
11	-0.19998033	8.78683190	-1.75719354		11.00000000	3.12181818	27.43089159	0.254531
12	-0.18982629	8.77659230	-1.66602796		12.00000000	2.86166667	25.11568163	0.275909
13	-0.18006077	8.79652400	-1.58390888		13.00000000	2.64153846	23.23635647	0.297261
14	-0.16988516	8.77007390	-1.48990541		14.00000000	2.45285714	21.51173841	0.318642
15	-0.16007052	8.78235440	-1.40579604		15.00000000	2.28933333	20.10573667	0.340133
16	-0.14994253	8.77972410	-1.31645404		16.00000000	2.14625000	18.84348285	0.361512
17	-0.13980040	8.77897640	-1.22730441		17.00000000	2.02000000	17.73353233	0.382857
18	-0.12997311	8.77723790	-1.14080491		18.00000000	1.90777778	16.74501942	0.404224
19	-0.11983916	8.79607870	-1.05411468		19.00000000	1.80736842	15.89775487	0.425691
20	-0.11001708	8.77384000	-0.96527226		20.00000000	1.71700000	15.06468328	0.447102
21	-0.09983625	8.78055860	-0.87661800		21.00000000	1.63523810	14.35830392	0.468460
22	-0.09002832	8.77519990	-0.79001647		22.00000000	1.56090909	13.69728930	0.489842
23	-0.07987353	8.76122760	-0.69979013		23.00000000	1.49304348	13.08089373	0.511314
24	-0.07007155	8.78675370	-0.61570143		24.00000000	1.43083333	12.57238009	0.532711
25	-0.05989964	8.79116250	-0.52658746		25.00000000	1.37360000	12.07554081	0.554068
26	-0.04973071	8.78249260	-0.43675957		26.00000000	1.32076923	11.59964600	0.575446
27	-0.03991459	8.77830220	-0.35038230		27.00000000	1.27185185	11.16469991	0.596926
28	-0.02975533	8.78287030	-0.26133723		28.00000000	1.22642857	10.77156308	0.618305
29	-0.01994219	8.77968790	-0.17508620		29.00000000	1.18413793	10.39636147	0.639687
30	-0.00979782	8.78139500	-0.08603855		30.00000000	1.14466667	10.05177014	0.661030
31	-0.00062182	8.77828410	-0.00545850		31.00000000	1.10774194	9.72407342	0.682624
32	0.00952011	8.78265950	0.08361186		32.00000000	1.07312500	9.42489148	0.704026
33	0.01934116	8.78146650	0.16984373		33.00000000	1.04060606	9.13804726	0.725404
34	0.02947928	8.78735070	0.25904479		34.00000000	1.01000000	8.87522421	0.746805
35	0.03927205	8.78052520	0.34482923		35.00000000	0.98114286	8.61494958	0.768264
36	0.04946004	8.78333570	0.43442415		36.00000000	0.95388889	8.37832633	0.789646
37	0.05928184	8.77478790	0.52018555		37.00000000	0.92810811	8.14395180	0.811011
38	0.06944601	8.78581520	0.61013983		38.00000000	0.90368421	7.93960247	0.832385
39	0.07958414	8.77207760	0.69811823		39.00000000	0.88051282	7.72392679	0.853884
40	0.08939551	8.77911000	0.78481300		40.00000000	0.85850000	7.53686594	0.875255
41	0.09953363	8.76970960	0.87288105		41.00000000	0.83756098	7.34516653	0.896636
42	0.10935915	8.79359340	0.96165990		42.00000000	0.81761905	7.18980946	0.917994
43	0.11947792	8.76601030	1.04734468		43.00000000	0.79860465	7.00057660	0.939478
44	0.12929972	8.80601600	1.13861540		44.00000000	0.78045455	6.87269521	0.960872
45	0.13944604	8.76545810	1.22230842		45.00000000	0.76311111	6.68901847	0.982247
46	0.14925890	8.78714750	1.31155997		46.00000000	0.74652174	6.55979663	1.003592
47	0.15941636	8.78390790	1.40029862		47.00000000	0.73063830	6.41785952	1.025066
48	0.16957459	8.78395460	1.48953550		48.00000000	0.71541667	6.28418752	1.046429
49	0.17936066	8.76919080	1.57284785		49.00000000	0.70081633	6.14559208	1.067820
50	0.18954270	8.79909610	1.66780443		50.00000000	0.68680000	6.04321920	1.089306
51	0.19928560	8.78677180	1.75107709		51.00000000	0.67333333	5.91642635	1.110681
52	0.20945647	8.76728820	1.83636524		52.00000000	0.66038462	5.78978225	1.132035
53	0.21925668	8.78562550	1.92630708		53.00000000	0.64792453	5.69242226	1.153404
54	0.22940299	8.76969620	2.01179453		54.00000000	0.63592593	5.57687718	1.174885
55	0.23925158	8.78838540	2.10263509		55.00000000	0.62436364	5.48714827	1.196266
56	0.24940012	8.77424050	2.18829663		56.00000000	0.61321429	5.38048962	1.217625
57	0.25954121	8.79013630	2.28140261		57.00000000	0.60245614	5.29567159	1.239001
58	0.26939055	8.76296140	2.36065899		58.00000000	0.59206897	5.18827749	1.260479
59	0.27952570	8.78257940	2.45495665		59.00000000	0.58203390	5.11175893	1.281856
60	0.28936389	8.77504160	2.53918017		60.00000000	0.57233333	5.02224881	1.303210
61	0.29948115	8.77215100	2.62709387		61.00000000	0.56295082	4.93828960	1.324590
62	0.30934390	8.77817730	2.71547560		62.00000000	0.55387097	4.86197756	1.346057
63	0.31947532	8.77290920	2.80272797		63.00000000	0.54507937	4.78193178	1.367442
64	0.32932615	8.77324960	2.88926051		64.00000000	0.53656250	4.70739674	1.388788
65	0.33943674	8.76687430	2.97579923		65.00000000	0.52830769	4.63160713	1.410164
66	0.34926373	8.77950760	3.06636357		66.00000000	0.52030303	4.56800441	1.431641
67	0.35940856	8.76621720	3.15065350		67.00000000	0.51253731	4.49301341	1.453024
68	0.36955562	8.77422710	3.24256494		68.00000000	0.50500000	4.43098469	1.474376
69	0.37935433	8.77043720	3.32710333		69.00000000	0.49768116	4.36488135	1.495760
70	0.38954604	8.77323250	3.41757798		70.00000000	0.49057143	4.30389720	1.517235
71	0.39931425	8.76159480	3.49862966		71.00000000	0.48366197	4.23765022	1.538617
72	0.40946281	8.76557830	3.58917832		72.00000000	0.47694444	4.18069387	1.559997
73	0.41929799	8.76566510	3.67542576		73.00000000	0.47041096	4.12346493	1.581364
74	0.42947334	8.75355910	3.75942026		74.00000000	0.46405405	4.06212459	1.602838
75	0.43929362	8.76082040	3.84857251		75.00000000	0.45786667	4.01128763	1.624221
76	0.44942209	8.74311920	3.92935090		76.00000000	0.45184211	3.95050939	1.645597
77	0.45954606	8.75076390	4.02137907		77.00000000	0.44597403	3.90261341	1.666950
78	0.46943784	8.72435000	4.09554002		78.00000000	0.44025641	3.84095101	1.688423
79	0.47958338	8.72173500	4.18279915		79.00000000	0.43468354	3.79119468	1.709812
80	0.48936647	8.69274810	4.25393945		80.00000000	0.42925000	3.73136212	1.731197
81	0.49952024	8.66666790	4.32917603		81.00000000	0.42395062	3.67423921	1.752677
82	0.50933754	8.63340760	4.39731859		82.00000000	0.41878049	3.61550265	1.774046
83	0.51949728	8.56069090	4.44725564		83.00000000	0.41373494	3.54185693	1.795406
84	0.52925730	8.49413110	4.49558089		84.00000000	0.40880952	3.47248169	1.816782
85	0.53936636	8.38460060	4.52237151		85.00000000	0.40400000	3.38737864	1.838268
86	0.54953206	8.21508120	4.51445049		86.00000000	0.39930233	3.28030103	1.859655
87	0.55932480	8.00894550	4.47960184		87.00000000	0.39471264	3.16123205	1.881001
88	0.56946516	7.70606280	4.38833429		88.00000000	0.39022727	3.00711587	1.902378
89	0.57926762	7.29770470	4.22732403		89.00000000	0.38584270	2.81576606	1.923863
90	0.58938789	6.75077490	3.97882497		90.00000000	0.38155556	2.57579567	1.945234
91	0.59915537	6.03603600	3.61652338		91.00000000	0.37736264	2.27777446	1.966598
92	0.60928828	5.13201380	3.12687586		92.00000000	0.37326087	1.91557993	1.988066
93	0.61910707	4.01942730	2.48845586		93.00000000	0.36924731	1.48416273	2.009574
94	0.62921393	2.63516190	1.65808058		94.00000000	0.36531915	0.96267510	2.030979
95	0.63923597	0.97697216	0.62451575		95.00000000	0.36147368	0.35314973	2.052383
96	0.64902127	-0.89158076	-0.57865488		96.00000000	0.35770833	-0.31892587	2.073774
97	0.65913260	-3.09197210	-2.03801961		97.00000000	0.35402062	-1.09462188	2.095272
98	0.66886806	-5.55987880	-3.71882535		98.00000000	0.35040816	-1.94822692	2.116640
99	0.67914909	-8.46801850	-5.75104706		99.00000000	0.34686869	-2.93729046	2.137982
100	0.68400866	-9.99933240	-6.83962996		100.00000000	0.34340000	-3.43377075	2.159358
101	0.68395948	-10.00040900	-6.83987454		101.00000000	0.34000000	-3.40013906	2.180843
23:56 02/04/2018
Test Lot:	JK-PERC
Recipe:	Recipe_YJX-LID
Cell Name:	1-2-9h
Test Order:	4
Test Condition:	Light
1	-0.29979131	8.78407000	-2.63338785		1.00000000	34.34000000	301.64496380	0.000000
2	-0.29000288	8.80056480	-2.55218914		2.00000000	17.17000000	151.10569762	0.061711
3	-0.27981177	8.76043420	-2.45127260		3.00000000	11.44666667	100.27777014	0.083238
4	-0.26997721	8.79274270	-2.37384014		4.00000000	8.58500000	75.48569608	0.104620
5	-0.25981367	8.78221610	-2.28173980		5.00000000	6.86800000	60.31626017	0.125993
6	-0.24969698	8.77743820	-2.19169981		6.00000000	5.72333333	50.23620463	0.147368
7	-0.23986094	8.77802180	-2.10550456		7.00000000	4.90571429	43.06246694	0.168841
8	-0.22969216	8.78733250	-2.01838138		8.00000000	4.29250000	37.71962476	0.190233
9	-0.21987396	8.78053380	-1.93061074		9.00000000	3.81555556	33.50261452	0.211575
10	-0.20975433	8.78808690	-1.84333928		10.00000000	3.43400000	30.17829041	0.233002
11	-0.19989148	8.78062060	-1.75517125		11.00000000	3.12181818	27.41150104	0.254510
12	-0.18976067	8.78808020	-1.66763199		12.00000000	2.86166667	25.14855617	0.275892
13	-0.17998490	8.79934600	-1.58374941		13.00000000	2.64153846	23.24381090	0.297254
14	-0.16983995	8.77441880	-1.49024685		14.00000000	2.45285714	21.52239583	0.318632
15	-0.16003515	8.79963680	-1.40825120		15.00000000	2.28933333	20.14530185	0.340094
16	-0.14988127	8.76407910	-1.31357131		16.00000000	2.14625000	18.80990477	0.361474
17	-0.13975345	8.79347520	-1.22891850		17.00000000	2.02000000	17.76281990	0.382830
18	-0.12992036	8.77861600	-1.14052095		18.00000000	1.90777778	16.74764852	0.404200
19	-0.11976276	8.78182700	-1.05173584		19.00000000	1.80736842	15.87199680	0.425669
20	-0.10998104	8.77378850	-0.96495038		20.00000000	1.71700000	15.06459485	0.447038
21	-0.09978845	8.77913380	-0.87605615		21.00000000	1.63523810	14.35597403	0.468423
22	-0.08997174	8.78742220	-0.79061970		22.00000000	1.56090909	13.71636720	0.489786
23	-0.07986253	8.77909660	-0.70112085		23.00000000	1.49304348	13.10757292	0.511272
24	-0.07003093	8.79229740	-0.61573275		24.00000000	1.43083333	12.58031220	0.532653
25	-0.05986887	8.78188040	-0.52576121		25.00000000	1.37360000	12.06279092	0.554041
26	-0.04974178	8.78534130	-0.43699851		26.00000000	1.32076923	11.60340847	0.575386
27	-0.03993028	8.77156070	-0.35025091		27.00000000	1.27185185	11.15612572	0.596858
28	-0.02973398	8.79762940	-0.26158852		28.00000000	1.22642857	10.78966406	0.618235
29	-0.01995746	8.78385450	-0.17530346		29.00000000	1.18413793	10.40129529	0.639622
30	-0.00979316	8.78314690	-0.08601479		30.00000000	1.14466667	10.05377548	0.661103
31	-0.00060838	8.78363420	-0.00534375		31.00000000	1.10774194	9.72999995	0.682587
32	0.00954753	8.78036980	0.08383083		32.00000000	1.07312500	9.42243434	0.703938
33	0.01932004	8.78279500	0.16968396		33.00000000	1.04060606	9.13942971	0.725324
34	0.02946098	8.77140330	0.25841414		34.00000000	1.01000000	8.85911733	0.746793
35	0.03933100	8.78985400	0.34571372		35.00000000	0.98114286	8.62410247	0.768165
36	0.04943769	8.77918530	0.43402268		36.00000000	0.95388889	8.37436731	0.789526
37	0.05932111	8.79295440	0.52160781		37.00000000	0.92810811	8.16081227	0.810895
38	0.06942781	8.77118680	0.60896430		38.00000000	0.90368421	7.92638302	0.832515
39	0.07960001	8.79173280	0.69982198		39.00000000	0.88051282	7.74123344	0.853924
40	0.08940229	8.78243260	0.78516957		40.00000000	0.85850000	7.53971839	0.875289
41	0.09957300	8.77325250	0.87357908		41.00000000	0.83756098	7.34813392	0.896675
42	0.10939612	8.77910040	0.96039952		42.00000000	0.81761905	7.17795971	0.918163
43	0.11953185	8.78457070	1.05003599		43.00000000	0.79860465	7.01539902	0.939533
44	0.12939219	8.77170090	1.13498959		44.00000000	0.78045455	6.84591384	0.960897
45	0.13949963	8.79261780	1.22656693		45.00000000	0.76311111	6.70974434	0.982283
46	0.14932500	8.76620670	1.30901382		46.00000000	0.74652174	6.54416387	1.003759
47	0.15944882	8.78869920	1.40134772		47.00000000	0.73063830	6.42136022	1.025150
48	0.16960166	8.77384190	1.48805815		48.00000000	0.71541667	6.27695273	1.046491
49	0.17945009	8.77360820	1.57442478		49.00000000	0.70081633	6.14868787	1.067867
50	0.18954712	8.78722380	1.66559296		50.00000000	0.68680000	6.03506531	1.089351
51	0.19935907	8.77880000	1.75013340		51.00000000	0.67333333	5.91105867	1.110724
52	0.20950076	8.78837680	1.84117162		52.00000000	0.66038462	5.80370883	1.132126
53	0.21930230	8.76576810	1.92235311		53.00000000	0.64792453	5.67955616	1.153493
54	0.22945216	8.79084210	2.01707771		54.00000000	0.63592593	5.59032440	1.174970
55	0.23928349	8.77797220	2.10042382		55.00000000	0.62436364	5.48064664	1.196355
56	0.24943037	8.78118800	2.19029497		56.00000000	0.61321429	5.38474993	1.217744
57	0.25957802	8.78087230	2.27932145		57.00000000	0.60245614	5.29009043	1.239087
58	0.26940635	8.78681370	2.36722341		58.00000000	0.59206897	5.20239970	1.260557
59	0.27953836	8.77863980	2.45396657		59.00000000	0.58203390	5.10946594	1.281927
60	0.28939348	8.77915670	2.54063071		60.00000000	0.57233333	5.02460402	1.303301
61	0.29951656	8.77901360	2.62945995		61.00000000	0.56295082	4.94215290	1.324794
62	0.30931512	8.78673170	2.71786897		62.00000000	0.55387097	4.86671559	1.346169
63	0.31948733	8.77555750	2.80367943		63.00000000	0.54507937	4.78337531	1.367513
64	0.32930225	8.77132030	2.88841551		64.00000000	0.53656250	4.70636155	1.388890
65	0.33945063	8.77878480	2.97996403		65.00000000	0.52830769	4.63789954	1.410365
66	0.34927154	8.77784160	3.06585025		66.00000000	0.52030303	4.56713758	1.431754
67	0.35941097	8.76213840	3.14920866		67.00000000	0.51253731	4.49092288	1.453115
68	0.36958838	8.76981640	3.24122224		68.00000000	0.50500000	4.42875728	1.474490
69	0.37943384	8.77228640	3.32850231		69.00000000	0.49768116	4.36580167	1.495967
70	0.38955244	8.76665400	3.41507146		70.00000000	0.49057143	4.30066998	1.517343
71	0.39938077	8.77341460	3.50393308		71.00000000	0.48366197	4.24336701	1.538686
72	0.40950683	8.78389450	3.59706479		72.00000000	0.47694444	4.18942968	1.560064
73	0.41933888	8.77306080	3.67888549		73.00000000	0.47041096	4.12694394	1.581545
74	0.42949694	8.75379750	3.75972924		74.00000000	0.46405405	4.06223522	1.602916
75	0.43932751	8.76948740	3.85267706		75.00000000	0.45786667	4.01525596	1.624289
76	0.44949898	8.72792050	3.92319136		76.00000000	0.45184211	3.94364197	1.645658
77	0.45959377	8.74312020	4.01828357		77.00000000	0.44597403	3.89920452	1.667132
78	0.46947643	8.74530120	4.10571279		78.00000000	0.44025641	3.85017491	1.688515
79	0.47961217	8.71360590	4.17915143		79.00000000	0.43468354	3.78766110	1.709858
80	0.48941967	8.69085790	4.25347681		80.00000000	0.42925000	3.73055075	1.731235
81	0.49954274	8.66955850	4.33081501		81.00000000	0.42395062	3.67546468	1.752718
82	0.50938076	8.62377640	4.39278578		82.00000000	0.41878049	3.61146929	1.774094
83	0.51951498	8.56213000	4.44815480		83.00000000	0.41373494	3.54245234	1.795450
84	0.52929270	8.50184060	4.49996217		84.00000000	0.40880952	3.47563341	1.816826
85	0.53942025	8.39018820	4.52583742		85.00000000	0.40400000	3.38963603	1.838307
86	0.54954702	8.21874520	4.51658693		86.00000000	0.39930233	3.28176407	1.859695
87	0.55933219	8.00645830	4.47826986		87.00000000	0.39471264	3.16025032	1.881081
88	0.56947982	7.71109630	4.39131373		88.00000000	0.39022727	3.00908008	1.902425
89	0.57929182	7.30856610	4.23379256		89.00000000	0.38584270	2.81995685	1.923895
90	0.58940893	6.75616170	3.98214204		90.00000000	0.38155556	2.57785103	1.945270
91	0.59920228	6.05428840	3.62774341		91.00000000	0.37736264	2.28466224	1.966638
92	0.60932463	5.13745120	3.13037555		92.00000000	0.37326087	1.91760950	1.988196
93	0.61912465	4.03579380	2.49865942		93.00000000	0.36924731	1.49020601	2.009593
94	0.62921572	2.63014390	1.65492789		94.00000000	0.36531915	0.96084193	2.030948
95	0.63926291	0.97591513	0.62386635		95.00000000	0.36147368	0.35276764	2.052340
96	0.64903766	-0.90066379	-0.58456472		96.00000000	0.35770833	-0.32217494	2.073816
97	0.65914506	-3.12164690	-2.05761813		97.00000000	0.35402062	-1.10512737	2.095201
98	0.66890347	-5.60834310	-3.75144016		98.00000000	0.35040816	-1.96520920	2.116565
99	0.67917317	-8.54977700	-5.80677915		99.00000000	0.34686869	-2.96564992	2.137945
100	0.68376172	-9.99978730	-6.83747176		100.00000000	0.34340000	-3.43392696	2.159430
101	0.68373489	-10.00012300	-6.83743300		101.00000000	0.34000000	-3.40004182	2.180812
