# Supplementary material for: Study on the Electrical Injection Regeneration of Industrialized B-Doped Czochralski Silicon PERC Solar Cells
Source: Hindawi journal article supplement (doi:10.1155/2019/5357370), 2019-06-20
Supplement: f1 [file 5357370.f1.zip › section3.2/IVRawData_1-2-10min.csv]

12:18 02/04/2018
Test Lot:	JK-PERC
Recipe:	Recipe_YJX-LID
Cell Name:	1-2-10min
Test Order:	2
Test Condition:	Light
1	-0.29993084	8.83163360	-2.64887928		1.00000000	34.34000000	303.27829782	0.000000
2	-0.29010615	8.84198760	-2.56511498		2.00000000	17.17000000	151.81692709	0.061717
3	-0.27996662	8.83141040	-2.47250012		3.00000000	11.44666667	101.09021105	0.083086
4	-0.27018362	8.84453110	-2.38964743		4.00000000	8.58500000	75.93029949	0.104610
5	-0.25997487	8.84047890	-2.29830235		5.00000000	6.86800000	60.71640909	0.126002
6	-0.24984056	8.83014680	-2.20612882		6.00000000	5.72333333	50.53787352	0.147385
7	-0.24001884	8.83115290	-2.11964307		7.00000000	4.90571429	43.32311294	0.168785
8	-0.22985624	8.83201120	-2.03009289		8.00000000	4.29250000	37.91140808	0.190274
9	-0.22004049	8.83824440	-1.94477163		9.00000000	3.81555556	33.72281252	0.211671
10	-0.20987938	8.84778020	-1.85696662		10.00000000	3.43400000	30.38327721	0.233058
11	-0.20005544	8.82713320	-1.76591602		11.00000000	3.12181818	27.55670492	0.254543
12	-0.18991293	8.83149050	-1.67721424		12.00000000	2.86166667	25.27278198	0.275926
13	-0.18010983	8.84517000	-1.59310207		13.00000000	2.64153846	23.36485675	0.297269
14	-0.17000455	8.84326930	-1.50339602		14.00000000	2.45285714	21.69127627	0.318648
15	-0.16015455	8.83793070	-1.41543481		15.00000000	2.28933333	20.23296935	0.340136
16	-0.15002619	8.83322430	-1.32521499		16.00000000	2.14625000	18.95830765	0.361528
17	-0.13986360	8.82600500	-1.23443683		17.00000000	2.02000000	17.82853010	0.382875
18	-0.13004857	8.83947280	-1.14956080		18.00000000	1.90777778	16.86374978	0.404260
19	-0.11991947	8.84349440	-1.06050716		19.00000000	1.80736842	15.98345251	0.425740
20	-0.11007767	8.82856180	-0.97182751		20.00000000	1.71700000	15.15864061	0.447115
21	-0.09992474	8.83266540	-0.88260182		21.00000000	1.63523810	14.44351094	0.468468
22	-0.09011643	8.83662890	-0.79632549		22.00000000	1.56090909	13.79317438	0.489843
23	-0.07996798	8.83210950	-0.70628592		23.00000000	1.49304348	13.18672349	0.511328
24	-0.07015892	8.82624820	-0.61924005		24.00000000	1.43083333	12.62889013	0.532697
25	-0.06002982	8.83392330	-0.53029879		25.00000000	1.37360000	12.13427704	0.554052
26	-0.04985531	8.83349130	-0.44039645		26.00000000	1.32076923	11.66700351	0.575435
27	-0.04006263	8.82903860	-0.35371446		27.00000000	1.27185185	11.22922909	0.596910
28	-0.02989258	8.83734990	-0.26417122		28.00000000	1.22642857	10.83837841	0.618292
29	-0.02009023	8.83267500	-0.17745044		29.00000000	1.18413793	10.45910550	0.639647
30	-0.00996112	8.83012200	-0.08795792		30.00000000	1.14466667	10.10754632	0.661034
31	-0.00068126	8.83720780	-0.00602041		31.00000000	1.10774194	9.78934567	0.682623
32	0.00946476	8.83531380	0.08362411		32.00000000	1.07312500	9.48139612	0.704014
33	0.01925195	8.83832260	0.17015498		33.00000000	1.04060606	9.19721206	0.725399
34	0.02943510	8.83709140	0.26012067		34.00000000	1.01000000	8.92546231	0.746764
35	0.03923644	8.83174900	0.34652637		35.00000000	0.98114286	8.66520745	0.768235
36	0.04939502	8.83804700	0.43655552		36.00000000	0.95388889	8.43051483	0.789615
37	0.05921422	8.82352160	0.52247794		37.00000000	0.92810811	8.18918194	0.810996
38	0.06937355	8.82964320	0.61254368		38.00000000	0.90368421	7.97920914	0.832344
39	0.07949641	8.83708760	0.70251677		39.00000000	0.88051282	7.78116893	0.853810
40	0.08933719	8.82163720	0.78810030		40.00000000	0.85850000	7.57337554	0.875187
41	0.09949876	8.83871170	0.87944082		41.00000000	0.83756098	7.40295999	0.896574
42	0.10930084	8.82922740	0.96504197		42.00000000	0.81761905	7.21894450	0.918070
43	0.11945794	8.82889370	1.05468145		43.00000000	0.79860465	7.05079557	0.939448
44	0.12926225	8.84148220	1.14286988		44.00000000	0.78045455	6.90037497	0.960811
45	0.13940446	8.82674880	1.23048815		45.00000000	0.76311111	6.73579008	0.982190
46	0.14925417	8.84256360	1.31978949		46.00000000	0.74652174	6.60116596	1.003672
47	0.15940085	8.82939910	1.40741372		47.00000000	0.73063830	6.45109713	1.025064
48	0.16954753	8.83421230	1.49781887		48.00000000	0.71541667	6.32014272	1.046409
49	0.17936152	8.83214760	1.58414742		49.00000000	0.70081633	6.18971324	1.067777
50	0.18952607	8.82577130	1.67271375		50.00000000	0.68680000	6.06153973	1.089265
51	0.19928721	8.83777710	1.76125594		51.00000000	0.67333333	5.95076991	1.110646
52	0.20942347	8.82635020	1.84844489		52.00000000	0.66038462	5.82878588	1.131984
53	0.21926945	8.84634020	1.93973215		53.00000000	0.64792453	5.73176080	1.153380
54	0.22940870	8.82655720	2.02488901		54.00000000	0.63592593	5.61303656	1.174855
55	0.23924427	8.82834150	2.11213012		55.00000000	0.62436364	5.51209540	1.196235
56	0.24937531	8.83832450	2.20405991		56.00000000	0.61321429	5.41978685	1.217598
57	0.25953242	8.83614640	2.29326646		57.00000000	0.60245614	5.32339066	1.238976
58	0.26932630	8.83282570	2.37891226		58.00000000	0.59206897	5.22964197	1.260523
59	0.27948639	8.82311630	2.46594092		59.00000000	0.58203390	5.13535278	1.281896
60	0.28932640	8.83156680	2.55520543		60.00000000	0.57233333	5.05460007	1.303249
61	0.29945076	8.83208940	2.64477588		61.00000000	0.56295082	4.97203197	1.324636
62	0.30927891	8.83441260	2.73229750		62.00000000	0.55387097	4.89312466	1.346111
63	0.31942484	8.83510490	2.82215197		63.00000000	0.54507937	4.81583337	1.367494
64	0.32923436	8.83833120	2.90988232		64.00000000	0.53656250	4.74231708	1.388870
65	0.33937135	8.82921890	2.99638394		65.00000000	0.52830769	4.66454426	1.410247
66	0.34920767	8.82898520	3.08314935		66.00000000	0.52030303	4.59374775	1.431731
67	0.35934541	8.82323460	3.17058885		67.00000000	0.51253731	4.52223696	1.453127
68	0.36950475	8.83383180	3.26414281		68.00000000	0.50500000	4.46108506	1.474514
69	0.37932393	8.82653520	3.34811602		69.00000000	0.49768116	4.39280027	1.495864
70	0.38946989	8.83018020	3.43908931		70.00000000	0.49057143	4.33183412	1.517347
71	0.39932629	8.81356530	3.51948833		71.00000000	0.48366197	4.26278637	1.538719
72	0.40944543	8.84320450	3.62080967		72.00000000	0.47694444	4.21771726	1.560097
73	0.41925272	8.81089120	3.69399010		73.00000000	0.47041096	4.14473978	1.581579
74	0.42941725	8.82220170	3.78840559		74.00000000	0.46405405	4.09397846	1.602964
75	0.43924612	8.82480140	3.87625977		75.00000000	0.45786667	4.04058240	1.624320
76	0.44940472	8.79814150	3.95392632		76.00000000	0.45184211	3.97537078	1.645695
77	0.45954692	8.80865380	4.04798972		77.00000000	0.44597403	3.92843080	1.667170
78	0.46939665	8.79450990	4.12811349		78.00000000	0.44025641	3.87183936	1.688556
79	0.47952250	8.78484730	4.21253194		79.00000000	0.43468354	3.81862856	1.709916
80	0.48934615	8.76987740	4.29150574		80.00000000	0.42925000	3.76446987	1.731292
81	0.49949133	8.74442860	4.36776627		81.00000000	0.42395062	3.70720590	1.752784
82	0.50929046	8.71323390	4.43756690		82.00000000	0.41878049	3.64893234	1.774150
83	0.51943862	8.65269760	4.49454530		83.00000000	0.41373494	3.57992332	1.795496
84	0.52920198	8.58753110	4.54453846		84.00000000	0.40880952	3.51066450	1.816890
85	0.53935313	8.48645780	4.57719758		85.00000000	0.40400000	3.42852895	1.838372
86	0.54948938	8.32153130	4.57259307		86.00000000	0.39930233	3.32280680	1.859747
87	0.55931377	8.13799860	4.55169468		87.00000000	0.39471264	3.21217094	1.881096
88	0.56940913	7.84606270	4.46761974		88.00000000	0.39022727	3.06174765	1.902473
89	0.57924694	7.45151900	4.31626958		89.00000000	0.38584270	2.87511418	1.923955
90	0.58933628	6.92620900	4.08186625		90.00000000	0.38155556	2.64273352	1.945330
91	0.59913462	6.26921030	3.75610093		91.00000000	0.37736264	2.36576573	1.966685
92	0.60925752	5.39401290	3.28634292		92.00000000	0.37326087	2.01337395	1.988159
93	0.61907375	4.35307840	2.69487657		93.00000000	0.36924731	1.60736250	2.009671
94	0.62916535	3.05906680	1.92465883		94.00000000	0.36531915	1.11753568	2.031050
95	0.63927925	1.51672290	0.96960948		95.00000000	0.36147368	0.54825541	2.052432
96	0.64902925	-0.21603660	-0.14021407		96.00000000	0.35770833	-0.07727809	2.073825
97	0.65912235	-2.25458240	-1.48604565		97.00000000	0.35402062	-0.79816866	2.095350
98	0.66883290	-4.50686980	-3.01434280		98.00000000	0.35040816	-1.57924397	2.116737
99	0.67900336	-7.15027950	-4.85506381		99.00000000	0.34686869	-2.48020806	2.138118
100	0.68871838	-9.98057650	-6.87380648		100.00000000	0.34340000	-3.42732997	2.159521
101	0.68872136	-10.00028500	-6.88740989		101.00000000	0.34000000	-3.40009690	2.181014
12:18 02/04/2018
Test Lot:	JK-PERC
Recipe:	Recipe_YJX-LID
Cell Name:	1-2-10min
Test Order:	3
Test Condition:	Light
1	-0.29992881	8.83289050	-2.64923834		1.00000000	34.34000000	303.32145977	0.000000
2	-0.29012626	8.83820720	-2.56419600		2.00000000	17.17000000	151.75201762	0.061733
3	-0.27997538	8.83655070	-2.47401664		3.00000000	11.44666667	101.14905035	0.083245
4	-0.27016392	8.84214590	-2.38882880		4.00000000	8.58500000	75.90982255	0.104647
5	-0.26001751	8.83201120	-2.29647756		5.00000000	6.86800000	60.65825292	0.125999
6	-0.24985027	8.83614350	-2.20771284		6.00000000	5.72333333	50.57219463	0.147368
7	-0.24002095	8.84125140	-2.12208556		7.00000000	4.90571429	43.37265330	0.168878
8	-0.22988795	8.83058260	-2.03004453		8.00000000	4.29250000	37.90527581	0.190256
9	-0.22005713	8.84646700	-1.94672814		9.00000000	3.81555556	33.75418631	0.211607
10	-0.20989583	8.85554500	-1.85874197		10.00000000	3.43400000	30.40994153	0.232990
11	-0.20009330	8.83085820	-1.76699556		11.00000000	3.12181818	27.56833369	0.254487
12	-0.18995880	8.84474950	-1.68013800		12.00000000	2.86166667	25.31072482	0.275869
13	-0.18016595	8.83363630	-1.59152048		13.00000000	2.64153846	23.33439004	0.297231
14	-0.17004187	8.83623700	-1.50253026		14.00000000	2.45285714	21.67402704	0.318605
15	-0.16020733	8.83981320	-1.41620287		15.00000000	2.28933333	20.23727902	0.340073
16	-0.15003860	8.83300400	-1.32529155		16.00000000	2.14625000	18.95783484	0.361436
17	-0.13987134	8.83953950	-1.23639823		17.00000000	2.02000000	17.85586979	0.382770
18	-0.13010976	8.83817100	-1.14993231		18.00000000	1.90777778	16.86126623	0.404149
19	-0.11989636	8.83826260	-1.05967551		19.00000000	1.80736842	15.97399672	0.425639
20	-0.11008340	8.82974150	-0.97200797		20.00000000	1.71700000	15.16066616	0.447014
21	-0.09993849	8.83869460	-0.88332578		21.00000000	1.63523810	14.45337012	0.468409
22	-0.09011139	8.83818050	-0.79642073		22.00000000	1.56090909	13.79559629	0.489752
23	-0.07994340	8.83468440	-0.70627467		23.00000000	1.49304348	13.19056793	0.511298
24	-0.07013416	8.83411690	-0.61957339		24.00000000	1.43083333	12.64014893	0.532688
25	-0.05998106	8.83216480	-0.52976263		25.00000000	1.37360000	12.13186157	0.554072
26	-0.04984136	8.83684920	-0.44044055		26.00000000	1.32076923	11.67143852	0.575486
27	-0.04003957	8.84519200	-0.35415764		27.00000000	1.27185185	11.24977383	0.596944
28	-0.02985669	8.83325770	-0.26373183		28.00000000	1.22642857	10.83335962	0.618315
29	-0.02004597	8.83995340	-0.17720542		29.00000000	1.18413793	10.46772413	0.639707
30	-0.00993752	8.82205010	-0.08766932		30.00000000	1.14466667	10.09830668	0.661175
31	-0.00067461	8.84166240	-0.00596468		31.00000000	1.10774194	9.79428022	0.682677
32	0.00949466	8.83749960	0.08390906		32.00000000	1.07312500	9.48374176	0.704045
33	0.01930734	8.83182430	0.17051900		33.00000000	1.04060606	9.19044989	0.725423
34	0.02943410	8.83846280	0.26015220		34.00000000	1.01000000	8.92684743	0.746914
35	0.03925720	8.85062220	0.34745060		35.00000000	0.98114286	8.68372475	0.768301
36	0.04940703	8.82424450	0.43597972		36.00000000	0.95388889	8.41734878	0.789655
37	0.05921301	8.83729170	0.52328263		37.00000000	0.92810811	8.20196208	0.811034
38	0.06936657	8.84114170	0.61327965		38.00000000	0.90368421	7.98960016	0.832522
39	0.07950077	8.83601670	0.70247015		39.00000000	0.88051282	7.78022599	0.853889
40	0.08933057	8.82352640	0.78821063		40.00000000	0.85850000	7.57499741	0.875247
41	0.09947445	8.85274790	0.88062225		41.00000000	0.83756098	7.41471617	0.896625
42	0.10929978	8.83292390	0.96543664		42.00000000	0.81761905	7.22196683	0.918098
43	0.11946674	8.82825280	1.05468258		43.00000000	0.79860465	7.05028375	0.939491
44	0.12926899	8.84210300	1.14300972		44.00000000	0.78045455	6.90085948	0.960836
45	0.13943148	8.83886340	1.23241581		45.00000000	0.76311111	6.74503487	0.982209
46	0.14922480	8.83620170	1.31858043		46.00000000	0.74652174	6.59641666	1.003704
47	0.15937911	8.81698990	1.40524400		47.00000000	0.73063830	6.44203049	1.025078
48	0.16954085	8.86001110	1.50213381		48.00000000	0.71541667	6.33859961	1.046427
49	0.17932896	8.83115480	1.58368181		49.00000000	0.70081633	6.18901747	1.067801
50	0.18950114	8.83994670	1.67517998		50.00000000	0.68680000	6.07127539	1.089281
51	0.19927213	8.83616830	1.76080208		51.00000000	0.67333333	5.94968666	1.110662
52	0.20941155	8.83156870	1.84943249		52.00000000	0.66038462	5.83223210	1.132047
53	0.21924208	8.83785060	1.93762875		53.00000000	0.64792453	5.72626018	1.153389
54	0.22940680	8.83573440	2.02697755		54.00000000	0.63592593	5.61887258	1.174857
55	0.23922990	8.83585930	2.11380174		55.00000000	0.62436364	5.51678924	1.196225
56	0.24937974	8.82435420	2.20061516		56.00000000	0.61321429	5.41122006	1.217600
57	0.25953254	8.84504320	2.29557653		57.00000000	0.60245614	5.32875059	1.238986
58	0.26934820	8.83433720	2.37951282		58.00000000	0.59206897	5.23053689	1.260466
59	0.27949059	8.83216670	2.46850748		59.00000000	0.58203390	5.14062041	1.281839
60	0.28931668	8.83310600	2.55556490		60.00000000	0.57233333	5.05548100	1.303231
61	0.29945832	8.84287170	2.64807150		61.00000000	0.56295082	4.97810187	1.324711
62	0.30928141	8.82534410	2.72951487		62.00000000	0.55387097	4.88810188	1.346084
63	0.31942457	8.84304050	2.82468441		63.00000000	0.54507937	4.82015890	1.367450
64	0.32923424	8.82304950	2.90485000		64.00000000	0.53656250	4.73411750	1.388836
65	0.33940494	8.83564570	2.99886180		65.00000000	0.52830769	4.66793959	1.410344
66	0.34923026	8.83844950	3.08665402		66.00000000	0.52030303	4.59867206	1.431742
67	0.35939276	8.82912730	3.17312443		67.00000000	0.51253731	4.52525719	1.453095
68	0.36953515	8.82730480	3.26199940		68.00000000	0.50500000	4.45778892	1.474480
69	0.37933591	8.83550930	3.35162596		69.00000000	0.49768116	4.39726651	1.495970
70	0.38949022	8.81597330	3.43373538		70.00000000	0.49057143	4.32486462	1.517344
71	0.39931926	8.84322740	3.53127102		71.00000000	0.48366197	4.27713280	1.538694
72	0.40942818	8.82117180	3.61163632		72.00000000	0.47694444	4.20720888	1.560066
73	0.41926020	8.82397080	3.69953976		73.00000000	0.47041096	4.15089257	1.581552
74	0.42941970	8.81866840	3.78690994		74.00000000	0.46405405	4.09233882	1.602933
75	0.43923312	8.83020880	3.87852016		75.00000000	0.45786667	4.04305827	1.624280
76	0.44938743	8.81278900	3.96035660		76.00000000	0.45184211	3.98198914	1.645655
77	0.45951718	8.81201840	4.04927385		77.00000000	0.44597403	3.92993132	1.667136
78	0.46939087	8.80619910	4.13354946		78.00000000	0.44025641	3.87698560	1.688526
79	0.47950795	8.78222270	4.21114560		79.00000000	0.43468354	3.81748769	1.709867
80	0.48933181	8.78114130	4.29689177		80.00000000	0.42925000	3.76930490	1.731242
81	0.49945262	8.74886700	4.36964455		81.00000000	0.42395062	3.70908757	1.752727
82	0.50927496	8.70916180	4.43535803		82.00000000	0.41878049	3.64722703	1.774114
83	0.51943302	8.65888120	4.49770881		83.00000000	0.41373494	3.58248169	1.795535
84	0.52921438	8.59633920	4.54930632		84.00000000	0.40880952	3.51426533	1.816888
85	0.53933597	8.48257160	4.57495598		85.00000000	0.40400000	3.42695893	1.838355
86	0.54949844	8.33570290	4.58045574		86.00000000	0.39930233	3.32846555	1.859733
87	0.55930072	8.13518240	4.55001337		87.00000000	0.39471264	3.21105935	1.881113
88	0.56940591	7.84637740	4.46777366		88.00000000	0.39022727	3.06187045	1.902472
89	0.57924908	7.47023300	4.32712559		89.00000000	0.38584270	2.88233485	1.923939
90	0.58935428	6.93617960	4.08786713		90.00000000	0.38155556	2.64653786	1.945306
91	0.59914458	6.27959920	3.76238783		91.00000000	0.37736264	2.36968612	1.966692
92	0.60924608	5.40935330	3.29562729		92.00000000	0.37326087	2.01909992	1.988246
93	0.61905277	4.35822680	2.69797237		93.00000000	0.36924731	1.60926353	2.009687
94	0.62918401	3.05197360	1.92025299		94.00000000	0.36531915	1.11494440	2.031065
95	0.63927358	1.51099620	0.96593995		95.00000000	0.36147368	0.54618536	2.052457
96	0.64901477	-0.24355628	-0.15807162		96.00000000	0.35770833	-0.08712211	2.073939
97	0.65909541	-2.30183980	-1.51713205		97.00000000	0.35402062	-0.81489875	2.095321
98	0.66885376	-4.57054620	-3.05702701		98.00000000	0.35040816	-1.60155670	2.116661
99	0.67904305	-7.24325080	-4.91847912		99.00000000	0.34686869	-2.51245689	2.138041
100	0.68828928	-9.98929880	-6.87552728		100.00000000	0.34340000	-3.43032521	2.159524
101	0.68831092	-10.00042200	-6.88339967		101.00000000	0.34000000	-3.40014348	2.180897
12:18 02/04/2018
Test Lot:	JK-PERC
Recipe:	Recipe_YJX-LID
Cell Name:	1-2-10min
Test Order:	4
Test Condition:	Light
1	-0.29997569	8.84285160	-2.65264051		1.00000000	34.34000000	303.66352394	0.000000
2	-0.29011881	8.83467770	-2.56310618		2.00000000	17.17000000	151.69141611	0.021531
3	-0.27999699	8.84891130	-2.47766853		3.00000000	11.44666667	101.29053801	0.042924
4	-0.27015796	8.83776860	-2.38759354		4.00000000	8.58500000	75.87224343	0.064311
5	-0.26003689	8.82834150	-2.29569447		5.00000000	6.86800000	60.63304942	0.085646
6	-0.24990313	8.84889980	-2.21136776		6.00000000	5.72333333	50.64520319	0.107174
7	-0.24005444	8.83037090	-2.11976974		7.00000000	4.90571429	43.31927667	0.128549
8	-0.22989093	8.84000300	-2.03223651		8.00000000	4.29250000	37.94571288	0.149933
9	-0.22008169	8.83594320	-1.94462931		9.00000000	3.81555556	33.71403217	0.171288
10	-0.20993453	8.82727620	-1.85315008		10.00000000	3.43400000	30.31286647	0.192758
11	-0.20009553	8.84227470	-1.76929964		11.00000000	3.12181818	27.60397393	0.214157
12	-0.18994614	8.84217260	-1.67953655		12.00000000	2.86166667	25.30335059	0.235579
13	-0.18014435	8.83566280	-1.59169473		13.00000000	2.64153846	23.33974312	0.257082
14	-0.16999200	8.83825400	-1.50243247		14.00000000	2.45285714	21.67897445	0.278531
15	-0.16019095	8.82928750	-1.41437195		15.00000000	2.28933333	20.21318218	0.299897
16	-0.15000585	8.84517670	-1.32682825		16.00000000	2.14625000	18.98396049	0.321272
17	-0.13989443	8.82723520	-1.23488104		17.00000000	2.02000000	17.83101510	0.342751
18	-0.13007700	8.83906560	-1.14975914		18.00000000	1.90777778	16.86297293	0.364124
19	-0.11991943	8.84390640	-1.06055621		19.00000000	1.80736842	15.98419715	0.385471
20	-0.11009457	8.84181210	-0.97343550		20.00000000	1.71700000	15.18139138	0.406854
21	-0.09993030	8.84400180	-0.88378376		21.00000000	1.63523810	14.46204866	0.428328
22	-0.09012404	8.84080790	-0.79676933		22.00000000	1.56090909	13.79969742	0.449702
23	-0.07997094	8.82900050	-0.70606348		23.00000000	1.49304348	13.18208162	0.471074
24	-0.07016841	8.84297180	-0.62049724		24.00000000	1.43083333	12.65281882	0.492448
25	-0.05999893	8.83596130	-0.53014819		25.00000000	1.37360000	12.13707644	0.513927
26	-0.04986369	8.84348960	-0.44096898		26.00000000	1.32076923	11.68020896	0.535317
27	-0.04004106	8.82651040	-0.35342280		27.00000000	1.27185185	11.22601360	0.556661
28	-0.02989465	8.82838150	-0.26392136		28.00000000	1.22642857	10.82737931	0.578032
29	-0.02009063	8.83670430	-0.17753491		29.00000000	1.18413793	10.46387675	0.599511
30	-0.00995241	8.83540250	-0.08793353		30.00000000	1.14466667	10.11359073	0.620884
31	-0.00071257	8.82030770	-0.00628509		31.00000000	1.10774194	9.77062472	0.642359
32	0.00945149	8.84485150	0.08359704		32.00000000	1.07312500	9.49163127	0.663731
33	0.01926193	8.82813450	0.17004694		33.00000000	1.04060606	9.18661026	0.685213
34	0.02941773	8.82981300	0.25975301		34.00000000	1.01000000	8.91811113	0.706609
35	0.03923263	8.84663870	0.34707694		35.00000000	0.98114286	8.67981637	0.727983
36	0.04938768	8.82770060	0.43597967		36.00000000	0.95388889	8.42064552	0.749345
37	0.05923459	8.84299560	0.52381125		37.00000000	0.92810811	8.20725592	0.770823
38	0.06936285	8.84914680	0.61380203		38.00000000	0.90368421	7.99683424	0.792199
39	0.07947175	8.82773880	0.70155581		39.00000000	0.88051282	7.77293719	0.813587
40	0.08931048	8.84208970	0.78969123		40.00000000	0.85850000	7.59093401	0.834944
41	0.09943724	8.83649350	0.87867650		41.00000000	0.83756098	7.40110212	0.856423
42	0.10925587	8.83605960	0.96539138		42.00000000	0.81761905	7.22453063	0.877797
43	0.11942729	8.84119800	1.05588032		43.00000000	0.79860465	7.06062184	0.899194
44	0.12925112	8.84232330	1.14288019		44.00000000	0.78045455	6.90103141	0.920664
45	0.13942553	8.83765700	1.23219501		45.00000000	0.76311111	6.74411425	0.942057
46	0.14923449	8.82936290	1.31764547		46.00000000	0.74652174	6.59131135	0.963401
47	0.15939549	8.84172060	1.40933039		47.00000000	0.73063830	6.46009969	0.984783
48	0.16952597	8.83845810	1.49834818		48.00000000	0.71541667	6.32318023	1.006282
49	0.17937213	8.83510490	1.58477158		49.00000000	0.70081633	6.19178576	1.027675
50	0.18949890	8.83748630	1.67469393		50.00000000	0.68680000	6.06958559	1.049035
51	0.19929595	8.83590980	1.76096104		51.00000000	0.67333333	5.94951260	1.070415
52	0.20943610	8.83315940	1.84998246		52.00000000	0.66038462	5.83328257	1.091888
53	0.21923763	8.83179760	1.93626237		53.00000000	0.64792453	5.72233829	1.113265
54	0.22940309	8.83102990	2.02586555		54.00000000	0.63592593	5.61588087	1.134627
55	0.23922916	8.84203430	2.11527244		55.00000000	0.62436364	5.52064469	1.156008
56	0.24938272	8.83277030	2.20274028		56.00000000	0.61321429	5.41638093	1.177482
57	0.25951916	8.83520890	2.29290599		57.00000000	0.60245614	5.32282585	1.198865
58	0.26935565	8.83487510	2.37972353		58.00000000	0.59206897	5.23085536	1.220219
59	0.27948391	8.83709810	2.46982673		59.00000000	0.58203390	5.14349066	1.241595
60	0.28933454	8.82383730	2.55304091		60.00000000	0.57233333	5.05017621	1.263076
61	0.29943824	8.85312840	2.65096519		61.00000000	0.56295082	4.98387589	1.284458
62	0.30926877	8.83681580	2.73295115		62.00000000	0.55387097	4.89445572	1.305819
63	0.31941786	8.82508180	2.81888874		63.00000000	0.54507937	4.81036998	1.327200
64	0.32921937	8.84191230	2.91092880		64.00000000	0.53656250	4.74423857	1.348668
65	0.33937591	8.82295890	2.99429971		65.00000000	0.52830769	4.66123706	1.370050
66	0.34920347	8.84090810	3.08727579		66.00000000	0.52030303	4.59995128	1.391421
67	0.35936597	8.82589340	3.17172574		67.00000000	0.51253731	4.52359969	1.412787
68	0.36951283	8.83498000	3.26463846		68.00000000	0.50500000	4.46166490	1.434259
69	0.37933666	8.83432770	3.35118436		69.00000000	0.49768116	4.39667845	1.455620
70	0.38947237	8.83660410	3.44161314		70.00000000	0.49057143	4.33498550	1.476994
71	0.39928651	8.82879830	3.52522006		71.00000000	0.48366197	4.27015399	1.498347
72	0.40945199	8.82966800	3.61532513		72.00000000	0.47694444	4.21126110	1.519821
73	0.41927284	8.83475780	3.70417399		73.00000000	0.47041096	4.15596689	1.541216
74	0.42941079	8.82598020	3.78997113		74.00000000	0.46405405	4.09573189	1.562592
75	0.43923834	8.82281590	3.87531901		75.00000000	0.45786667	4.03967331	1.584077
76	0.44937626	8.82348820	3.96506613		76.00000000	0.45184211	3.98682348	1.605469
77	0.45950079	8.80509090	4.04594622		77.00000000	0.44597403	3.92684184	1.626826
78	0.46939608	8.79499240	4.12833496		78.00000000	0.44025641	3.87205178	1.648203
79	0.47953698	8.79001140	4.21513552		79.00000000	0.43468354	3.82087331	1.669698
80	0.48934668	8.77643870	4.29472114		80.00000000	0.42925000	3.76728631	1.691081
81	0.49950024	8.74351220	4.36738644		81.00000000	0.42395062	3.70681739	1.712428
82	0.50929582	8.72348210	4.44283297		82.00000000	0.41878049	3.65322409	1.733814
83	0.51944935	8.65232280	4.49444345		83.00000000	0.41373494	3.57976825	1.755294
84	0.52921665	8.62017540	4.56194035		84.00000000	0.40880952	3.52400980	1.776689
85	0.53936571	8.49050430	4.57948688		85.00000000	0.40400000	3.43016374	1.798051
86	0.54948211	8.33519550	4.58004081		86.00000000	0.39930233	3.32826295	1.819429
87	0.55930668	8.13204100	4.54830485		87.00000000	0.39471264	3.20981940	1.840964
88	0.56942004	7.85888430	4.47500621		88.00000000	0.39022727	3.06675099	1.862334
89	0.57923865	7.47555350	4.33012952		89.00000000	0.38584270	2.88438772	1.883674
90	0.58934981	6.94559530	4.09338527		90.00000000	0.38155556	2.65013047	1.905055
91	0.59913272	6.28686290	3.76666527		91.00000000	0.37736264	2.37242716	1.926526
92	0.60924309	5.40697240	3.29416057		92.00000000	0.37326087	2.01821122	1.947890
93	0.61910784	4.36121750	2.70006395		93.00000000	0.36924731	1.61036784	1.969257
94	0.62917656	3.05800200	1.92402318		94.00000000	0.36531915	1.11714669	1.990731
95	0.63926238	1.49065180	0.95291762		95.00000000	0.36147368	0.53883140	2.012237
96	0.64902598	-0.26486805	-0.17190625		96.00000000	0.35770833	-0.09474551	2.033641
97	0.65909320	-2.34151480	-1.54327648		97.00000000	0.35402062	-0.82894452	2.055018
98	0.66885000	-4.62102750	-3.09077424		98.00000000	0.35040816	-1.61924576	2.076366
99	0.67903560	-7.34833620	-4.98978188		99.00000000	0.34686869	-2.54890773	2.097853
100	0.68793505	-9.99153800	-6.87352919		100.00000000	0.34340000	-3.43109415	2.119237
101	0.68790007	-10.00050200	-6.87934603		101.00000000	0.34000000	-3.40017068	2.140602
