# Supplementary material for: Study on the Electrical Injection Regeneration of Industrialized B-Doped Czochralski Silicon PERC Solar Cells
Source: Hindawi journal article supplement (doi:10.1155/2019/5357370), 2019-06-20
Supplement: f1 [file 5357370.f1.zip › section3.2/IVRawData_1-2-20min.csv]

12:42 02/04/2018
Test Lot:	JK-PERC
Recipe:	Recipe_YJX-LID
Cell Name:	1-2-20min
Test Order:	2
Test Condition:	Light
1	-0.29988354	8.82342820	-2.64600088		1.00000000	34.34000000	302.99652439	0.000000
2	-0.29007953	8.83359150	-2.56244407		2.00000000	17.17000000	151.67276606	0.061775
3	-0.27996886	8.83075810	-2.47233728		3.00000000	11.44666667	101.08274438	0.083190
4	-0.27014476	8.84067920	-2.38826316		4.00000000	8.58500000	75.89723093	0.104688
5	-0.25997606	8.82923790	-2.29539048		5.00000000	6.86800000	60.63920590	0.126073
6	-0.24982521	8.84201910	-2.20895928		6.00000000	5.72333333	50.60582265	0.147455
7	-0.24001451	8.82946780	-2.11920039		7.00000000	4.90571429	43.31484632	0.168816
8	-0.22987854	8.83220670	-2.03033478		8.00000000	4.29250000	37.91224726	0.190363
9	-0.22003955	8.82763580	-1.94242901		9.00000000	3.81555556	33.68233482	0.211742
10	-0.20992219	8.83129500	-1.85388479		10.00000000	3.43400000	30.32666703	0.233119
11	-0.20010108	8.83830450	-1.76855428		11.00000000	3.12181818	27.59157968	0.254475
12	-0.18995617	8.81948660	-1.67531590		12.00000000	2.86166667	25.23843082	0.275943
13	-0.18013208	8.84746170	-1.59371168		13.00000000	2.64153846	23.37091037	0.297319
14	-0.16999760	8.82067490	-1.49949356		14.00000000	2.45285714	21.63585543	0.318706
15	-0.16018169	8.83215330	-1.41474924		15.00000000	2.28933333	20.21974295	0.340176
16	-0.15001298	8.83415220	-1.32523750		16.00000000	2.14625000	18.96029916	0.361549
17	-0.13987553	8.82825950	-1.23485748		17.00000000	2.02000000	17.83308419	0.382900
18	-0.13007152	8.82137200	-1.14740926		18.00000000	1.90777778	16.82921747	0.404274
19	-0.11989909	8.84354310	-1.06033277		19.00000000	1.80736842	15.98354053	0.425751
20	-0.11005787	8.82486340	-0.97124567		20.00000000	1.71700000	15.15229046	0.447145
21	-0.09994349	8.82499890	-0.88200118		21.00000000	1.63523810	14.43097439	0.468490
22	-0.09010971	8.83358480	-0.79599179		22.00000000	1.56090909	13.78842282	0.489854
23	-0.07995886	8.82839490	-0.70590843		23.00000000	1.49304348	13.18117743	0.511347
24	-0.07012136	8.83373550	-0.61943357		24.00000000	1.43083333	12.63960321	0.532732
25	-0.05996977	8.83719640	-0.52996465		25.00000000	1.37360000	12.13877298	0.554096
26	-0.04983306	8.81926630	-0.43949105		26.00000000	1.32076923	11.64821557	0.575479
27	-0.04003353	8.83971980	-0.35388516		27.00000000	1.27185185	11.24281400	0.596957
28	-0.02983802	8.81997590	-0.26317058		28.00000000	1.22642857	10.81707044	0.618349
29	-0.02003476	8.83963300	-0.17709990		29.00000000	1.18413793	10.46734473	0.639692
30	-0.00990996	8.81929300	-0.08739882		30.00000000	1.14466667	10.09515072	0.661059
31	-0.00064483	8.83256340	-0.00569552		31.00000000	1.10774194	9.78420088	0.682654
32	0.00950060	8.82072640	0.08380219		32.00000000	1.07312500	9.46574202	0.704044
33	0.01931474	8.83026890	0.17055438		33.00000000	1.04060606	9.18883133	0.725395
34	0.02946679	8.82758900	0.26012074		34.00000000	1.01000000	8.91586489	0.746779
35	0.03928020	8.82299140	0.34656882		35.00000000	0.98114286	8.65661499	0.768260
36	0.04940917	8.83982470	0.43676840		36.00000000	0.95388889	8.43221056	0.789670
37	0.05923076	8.83114150	0.52307519		37.00000000	0.92810811	8.19625403	0.811046
38	0.06939397	8.83394720	0.61302267		38.00000000	0.90368421	7.98309860	0.832403
39	0.07952072	8.82589340	0.70184137		39.00000000	0.88051282	7.77131229	0.853886
40	0.08934305	8.82844830	0.78876049		40.00000000	0.85850000	7.57922287	0.875258
41	0.09948766	8.83434580	0.87890835		41.00000000	0.83756098	7.39930329	0.896636
42	0.10930105	8.82745550	0.96485015		42.00000000	0.81761905	7.21749576	0.917985
43	0.11944640	8.83916380	1.05580629		43.00000000	0.79860465	7.05899732	0.939465
44	0.12929702	8.81992530	1.14039006		44.00000000	0.78045455	6.88355079	0.960838
45	0.13943715	8.84186270	1.23288414		45.00000000	0.76311111	6.74732367	0.982226
46	0.14925875	8.81854530	1.31624505		46.00000000	0.74652174	6.58323577	1.003692
47	0.15938176	8.83457470	1.40807006		47.00000000	0.73063830	6.45487862	1.025065
48	0.16955242	8.82331470	1.49601436		48.00000000	0.71541667	6.31234639	1.046454
49	0.17937401	8.83246040	1.58431384		49.00000000	0.70081633	6.18993245	1.067828
50	0.18951340	8.82820990	1.67306407		50.00000000	0.68680000	6.06321456	1.089307
51	0.19929406	8.83001230	1.75976900		51.00000000	0.67333333	5.94554162	1.110688
52	0.20945653	8.82364370	1.84816979		52.00000000	0.66038462	5.82699855	1.132037
53	0.21927364	8.82036300	1.93407310		53.00000000	0.64792453	5.71492954	1.153418
54	0.22943537	8.82686810	2.02519575		54.00000000	0.63592593	5.61323427	1.174896
55	0.23925547	8.82009220	2.11025530		55.00000000	0.62436364	5.50694484	1.196287
56	0.24940231	8.84054950	2.20485347		56.00000000	0.61321429	5.42115125	1.217644
57	0.25953874	8.82401560	2.29017389		57.00000000	0.60245614	5.31608238	1.239021
58	0.26936850	8.84191610	2.38173368		58.00000000	0.59206897	5.23502412	1.260505
59	0.27950940	8.82106400	2.46557031		59.00000000	0.58203390	5.13415827	1.281892
60	0.28935033	8.83826260	2.55735420		60.00000000	0.57233333	5.05843229	1.303241
61	0.29947111	8.82109550	2.64166326		61.00000000	0.56295082	4.96584294	1.324615
62	0.30927560	8.81659600	2.72675802		62.00000000	0.55387097	4.88325656	1.346099
63	0.31944549	8.82993220	2.82068202		63.00000000	0.54507937	4.81301384	1.367471
64	0.32925740	8.81054020	2.90093556		64.00000000	0.53656250	4.72740548	1.388814
65	0.33941838	8.82557490	2.99556234		65.00000000	0.52830769	4.66261911	1.410198
66	0.34924668	8.82018090	3.08041890		66.00000000	0.52030303	4.58916685	1.431675
67	0.35937864	8.82708840	3.17226702		67.00000000	0.51253731	4.52421217	1.453067
68	0.36952919	8.81806470	3.25853231		68.00000000	0.50500000	4.45312267	1.474437
69	0.37934482	8.81612210	3.34435025		69.00000000	0.49768116	4.38761787	1.495800
70	0.38949314	8.82840820	3.43860443		70.00000000	0.49057143	4.33096482	1.517273
71	0.39930061	8.82537080	3.52397594		71.00000000	0.48366197	4.26849624	1.538637
72	0.40946084	8.82533260	3.61362810		72.00000000	0.47694444	4.20919335	1.560011
73	0.41929507	8.81246760	3.69502422		73.00000000	0.47041096	4.14548133	1.581374
74	0.42942256	8.81227870	3.78419128		74.00000000	0.46405405	4.08937366	1.602857
75	0.43928063	8.78398510	3.85863451		75.00000000	0.45786667	4.02189398	1.624245
76	0.44943044	8.82540610	3.96640615		76.00000000	0.45184211	3.98769007	1.645633
77	0.45954379	8.77852150	4.03411504		77.00000000	0.44597403	3.91499258	1.667104
78	0.46941894	8.79315380	4.12767294		78.00000000	0.44025641	3.87124233	1.688486
79	0.47957101	8.77621360	4.20881762		79.00000000	0.43468354	3.81487563	1.709845
80	0.48937100	8.76535420	4.28951015		80.00000000	0.42925000	3.76252829	1.731217
81	0.49949849	8.73736570	4.36430097		81.00000000	0.42395062	3.70421158	1.752689
82	0.50933200	8.69352050	4.42788818		82.00000000	0.41878049	3.64067676	1.774073
83	0.51944387	8.65304090	4.49476905		83.00000000	0.41373494	3.58006536	1.795416
84	0.52921259	8.57527920	4.53814572		84.00000000	0.40880952	3.50565581	1.816791
85	0.53938323	8.46738340	4.56716461		85.00000000	0.40400000	3.42082289	1.838279
86	0.54954123	8.31293960	4.56830305		86.00000000	0.39930233	3.31937611	1.859661
87	0.55932933	8.11968990	4.54158071		87.00000000	0.39471264	3.20494427	1.881020
88	0.56942332	7.82151890	4.45375526		88.00000000	0.39022727	3.05216999	1.902390
89	0.57922781	7.44013210	4.30953142		89.00000000	0.38584270	2.87072063	1.923864
90	0.58938581	6.89980410	4.06664663		90.00000000	0.38155556	2.63265859	1.945284
91	0.59917021	6.22904160	3.73225616		91.00000000	0.37736264	2.35060757	1.966633
92	0.60926569	5.37760880	3.27639254		92.00000000	0.37326087	2.00725094	1.988101
93	0.61909097	4.30568930	2.66561337		93.00000000	0.36924731	1.58986420	2.009641
94	0.62917006	3.00166440	1.88855737		94.00000000	0.36531915	1.09656548	2.031039
95	0.63929611	1.42484500	0.91089787		95.00000000	0.36147368	0.51504397	2.052412
96	0.64904100	-0.32418016	-0.21040622		96.00000000	0.35770833	-0.11596194	2.073783
97	0.65914917	-2.41040870	-1.58881889		97.00000000	0.35402062	-0.85333438	2.095275
98	0.66883379	-4.70258090	-3.14524501		98.00000000	0.35040816	-1.64782274	2.116667
99	0.67906100	-7.41597460	-5.03589913		99.00000000	0.34686869	-2.57236937	2.138027
100	0.68775427	-9.99181270	-6.87191185		100.00000000	0.34340000	-3.43118848	2.159384
101	0.68774307	-10.00037800	-6.87769067		101.00000000	0.34000000	-3.40012852	2.180855
12:42 02/04/2018
Test Lot:	JK-PERC
Recipe:	Recipe_YJX-LID
Cell Name:	1-2-20min
Test Order:	3
Test Condition:	Light
1	-0.29993564	8.84320930	-2.65239364		1.00000000	34.34000000	303.67580736	0.000000
2	-0.29008549	8.82436940	-2.55982152		2.00000000	17.17000000	151.51442260	0.021500
3	-0.27995548	8.83842950	-2.47436677		3.00000000	11.44666667	101.17055634	0.042926
4	-0.27016857	8.82490540	-2.38421207		4.00000000	8.58500000	75.76181286	0.064342
5	-0.26001403	8.83432960	-2.29704964		5.00000000	6.86800000	60.67417569	0.085841
6	-0.24985498	8.83773230	-2.20815143		6.00000000	5.72333333	50.58128786	0.107254
7	-0.24006213	8.82166580	-2.11774788		7.00000000	4.90571429	43.27657194	0.128621
8	-0.22987780	8.83444600	-2.03084301		8.00000000	4.29250000	37.92185946	0.149993
9	-0.22005296	8.81719880	-1.94025069		9.00000000	3.81555556	33.64251187	0.171494
10	-0.20993485	8.84713460	-1.85732188		10.00000000	3.43400000	30.38106022	0.192890
11	-0.20011075	8.82353500	-1.76568421		11.00000000	3.12181818	27.54547199	0.214229
12	-0.18990259	8.84314920	-1.67933694		12.00000000	2.86166667	25.30614529	0.235615
13	-0.18011719	8.82666590	-1.58983426		13.00000000	2.64153846	23.31597746	0.257092
14	-0.16997230	8.83169940	-1.50114426		14.00000000	2.45285714	21.66289696	0.278462
15	-0.16015266	8.84034730	-1.41580514		15.00000000	2.28933333	20.23850175	0.299831
16	-0.15002489	8.82664390	-1.32421628		16.00000000	2.14625000	18.94418447	0.321205
17	-0.13986361	8.82396410	-1.23415147		17.00000000	2.02000000	17.82440748	0.342684
18	-0.13003579	8.83207990	-1.14848649		18.00000000	1.90777778	16.84964576	0.364078
19	-0.11993481	8.83062650	-1.05909951		19.00000000	1.80736842	15.96019547	0.385432
20	-0.11008690	8.83356190	-0.97245945		20.00000000	1.71700000	15.16722578	0.406803
21	-0.09994200	8.82051660	-0.88154006		21.00000000	1.63523810	14.42364476	0.428290
22	-0.09008440	8.82387260	-0.79489330		22.00000000	1.56090909	13.77326296	0.449657
23	-0.07996035	8.82405950	-0.70557492		23.00000000	1.49304348	13.17470449	0.471017
24	-0.07015486	8.82659720	-0.61922870		24.00000000	1.43083333	12.62938949	0.492390
25	-0.05998763	8.82703500	-0.52951294		25.00000000	1.37360000	12.12481528	0.513867
26	-0.04984125	8.83453660	-0.44032436		26.00000000	1.32076923	11.66838411	0.535263
27	-0.04004469	8.82500550	-0.35339462		27.00000000	1.27185185	11.22409959	0.556607
28	-0.02986556	8.82949830	-0.26369787		28.00000000	1.22642857	10.82874899	0.577988
29	-0.02006676	8.82098390	-0.17700858		29.00000000	1.18413793	10.44526163	0.599457
30	-0.00992336	8.83404060	-0.08766333		30.00000000	1.14466667	10.11203181	0.620835
31	-0.00068130	8.82129570	-0.00600998		31.00000000	1.10774194	9.77171917	0.642294
32	0.00947678	8.83945940	0.08376964		32.00000000	1.07312500	9.48584487	0.663682
33	0.01930581	8.82305620	0.17033626		33.00000000	1.04060606	9.18132575	0.685159
34	0.02943181	8.82174110	0.25963983		34.00000000	1.01000000	8.90995851	0.706525
35	0.03923926	8.84166910	0.34694053		35.00000000	0.98114286	8.67494048	0.727928
36	0.04940619	8.81708530	0.43561862		36.00000000	0.95388889	8.41051970	0.749273
37	0.05921513	8.82073970	0.52232120		37.00000000	0.92810811	8.18660004	0.770745
38	0.06936271	8.81939790	0.61173731		38.00000000	0.90368421	7.96995063	0.792136
39	0.07950211	8.82557300	0.70165164		39.00000000	0.88051282	7.77103017	0.813513
40	0.08933486	8.81382750	0.78738205		40.00000000	0.85850000	7.56667091	0.834956
41	0.09947128	8.83966160	0.87929244		41.00000000	0.83756098	7.40375559	0.856423
42	0.10929956	8.81818960	0.96382424		42.00000000	0.81761905	7.20991978	0.877796
43	0.11943524	8.83537100	1.05525466		43.00000000	0.79860465	7.05596838	0.899212
44	0.12929255	8.82339860	1.14079970		44.00000000	0.78045455	6.88626154	0.920563
45	0.13944460	8.83448310	1.23192096		45.00000000	0.76311111	6.74169221	0.942046
46	0.14925577	8.82783890	1.31760589		46.00000000	0.74652174	6.59017365	0.963436
47	0.15942717	8.82553480	1.40703004		47.00000000	0.73063830	6.44827372	0.984818
48	0.16955020	8.83016590	1.49715639		48.00000000	0.71541667	6.31724785	1.006173
49	0.17938145	8.83100130	1.58411782		49.00000000	0.70081633	6.18890989	1.027661
50	0.18951564	8.82416630	1.67231752		50.00000000	0.68680000	6.06043741	1.049047
51	0.19930522	8.83153720	1.76017146		51.00000000	0.67333333	5.94656838	1.070427
52	0.20944461	8.82812120	1.84900240		52.00000000	0.66038462	5.82995542	1.091765
53	0.21925654	8.82204150	1.93429030		53.00000000	0.64792453	5.71601708	1.113231
54	0.22940783	8.82517910	2.02456519		54.00000000	0.63592593	5.61216019	1.134611
55	0.23923910	8.84464450	2.11598479		55.00000000	0.62436364	5.52227440	1.155985
56	0.24937552	8.81735520	2.19883254		56.00000000	0.61321429	5.40692817	1.177455
57	0.25951493	8.83844660	2.29370885		57.00000000	0.60245614	5.32477643	1.198888
58	0.26933724	8.82371900	2.37655612		58.00000000	0.59206897	5.22425018	1.220259
59	0.27948782	8.82569120	2.46667319		59.00000000	0.58203390	5.13685145	1.241634
60	0.28933173	8.82429600	2.55314883		60.00000000	0.57233333	5.05043874	1.263122
61	0.29945475	8.83394240	2.64536601		61.00000000	0.56295082	4.97307512	1.284499
62	0.30928972	8.81064030	2.72504047		62.00000000	0.55387097	4.87995787	1.305843
63	0.31941870	8.84599780	2.82557712		63.00000000	0.54507937	4.82177086	1.327212
64	0.32925072	8.81388760	2.90197884		64.00000000	0.53656250	4.72920157	1.348675
65	0.33939308	8.82647420	2.99564426		65.00000000	0.52830769	4.66309422	1.370057
66	0.34921244	8.81855870	3.07955040		66.00000000	0.52030303	4.58832281	1.391406
67	0.35936821	8.82385250	3.17101208		67.00000000	0.51253731	4.52255365	1.412780
68	0.36953217	8.81998250	3.25926727		68.00000000	0.50500000	4.45409116	1.434248
69	0.37934259	8.80793000	3.34122298		69.00000000	0.49768116	4.38354081	1.455625
70	0.38949019	8.82878020	3.43872328		70.00000000	0.49057143	4.33114732	1.477017
71	0.39930877	8.82057670	3.52213363		71.00000000	0.48366197	4.26617752	1.498390
72	0.40945041	8.81141090	3.60783581		72.00000000	0.47694444	4.20255348	1.519871
73	0.41927275	8.81128410	3.69433132		73.00000000	0.47041096	4.14492460	1.541252
74	0.42943075	8.80951020	3.78307457		74.00000000	0.46405405	4.08808892	1.562613
75	0.43925530	8.81689450	3.87286764		75.00000000	0.45786667	4.03696210	1.583996
76	0.44946861	8.79761410	3.95425138		76.00000000	0.45184211	3.97513248	1.605461
77	0.45961472	8.78790190	4.03904907		77.00000000	0.44597403	3.91917599	1.667079
78	0.46945348	8.79941650	4.13091670		78.00000000	0.44025641	3.87399952	1.688563
79	0.47962567	8.76429080	4.20357885		79.00000000	0.43468354	3.80969299	1.709937
80	0.48943314	8.76228140	4.28855090		80.00000000	0.42925000	3.76120929	1.731314
81	0.49957332	8.72323230	4.35789412		81.00000000	0.42395062	3.69821972	1.752669
82	0.50937259	8.70741460	4.43531833		82.00000000	0.41878049	3.64649533	1.774151
83	0.51951504	8.63937280	4.48828411		83.00000000	0.41373494	3.57441038	1.795546
84	0.52929795	8.57663440	4.53959501		84.00000000	0.40880952	3.50620982	1.816929
85	0.53942174	8.46117880	4.56414379		85.00000000	0.40400000	3.41831624	1.838279
86	0.54956639	8.31676860	4.57061650		86.00000000	0.39930233	3.32090504	1.859758
87	0.55940515	8.11810590	4.54131025		87.00000000	0.39471264	3.20431904	1.881140
88	0.56950665	7.79562900	4.43966256		88.00000000	0.39022727	3.04206704	1.902521
89	0.57932824	7.44540550	4.31333366		89.00000000	0.38584270	2.87275534	1.924024
90	0.58944905	6.89922760	4.06674315		90.00000000	0.38155556	2.63243862	1.945390
91	0.59923053	6.24769120	3.74380731		91.00000000	0.37736264	2.35764523	1.966732
92	0.60930443	5.35084920	3.26029612		92.00000000	0.37326087	1.99726263	1.988213
93	0.61912161	4.30346390	2.66436750		93.00000000	0.36924731	1.58904248	2.009722
94	0.62923574	2.98834660	1.88037448		94.00000000	0.36531915	1.09170024	2.031113
95	0.63935286	1.42376920	0.91029091		95.00000000	0.36147368	0.51465510	2.052517
96	0.64908439	-0.33461109	-0.21719084		96.00000000	0.35770833	-0.11969318	2.073903
97	0.65917915	-2.41731330	-1.59344253		97.00000000	0.35402062	-0.85577875	2.095396
98	0.66891968	-4.70240640	-3.14553218		98.00000000	0.35040816	-1.64776159	2.116774
99	0.67912757	-7.41178130	-5.03354502		99.00000000	0.34686869	-2.57091485	2.138121
100	0.68784839	-9.99152470	-6.87265418		100.00000000	0.34340000	-3.43108958	2.159495
101	0.68785959	-10.00032100	-6.87881670		101.00000000	0.34000000	-3.40010914	2.180982
12:43 02/04/2018
Test Lot:	JK-PERC
Recipe:	Recipe_YJX-LID
Cell Name:	1-2-20min
Test Order:	4
Test Condition:	Light
1	-0.29989707	8.83461480	-2.64947509		1.00000000	34.34000000	303.38067223	0.000000
2	-0.29009101	8.82388690	-2.55973026		2.00000000	17.17000000	151.50613807	0.061744
3	-0.27996042	8.82783030	-2.47144308		3.00000000	11.44666667	101.04923083	0.083268
4	-0.27013651	8.82767010	-2.38467599		4.00000000	8.58500000	75.78554781	0.104667
5	-0.25997019	8.83871360	-2.29780205		5.00000000	6.86800000	60.70428500	0.126025
6	-0.24979940	8.82643030	-2.20483699		6.00000000	5.72333333	50.51660275	0.147407
7	-0.23999929	8.84195610	-2.12206319		7.00000000	4.90571429	43.37611035	0.168896
8	-0.22987317	8.82275580	-2.02811484		8.00000000	4.29250000	37.87167927	0.190269
9	-0.22004551	8.82276250	-1.94140927		9.00000000	3.81555556	33.66374047	0.211608
10	-0.20988739	8.83816240	-1.85501884		10.00000000	3.43400000	30.35024968	0.232989
11	-0.20004039	8.83034040	-1.76642474		11.00000000	3.12181818	27.56671721	0.254480
12	-0.18988077	8.83369540	-1.67734888		12.00000000	2.86166667	25.27909167	0.275853
13	-0.18010372	8.83290100	-1.59083833		13.00000000	2.64153846	23.33244772	0.297207
14	-0.16993295	8.84104820	-1.50238540		14.00000000	2.45285714	21.68582823	0.318575
15	-0.16013208	8.81941130	-1.41227068		15.00000000	2.28933333	20.19057227	0.340045
16	-0.15001118	8.84389020	-1.32668240		16.00000000	2.14625000	18.98119934	0.361418
17	-0.13984412	8.82589340	-1.23424930		17.00000000	2.02000000	17.82830467	0.382766
18	-0.13002391	8.82924750	-1.14801328		18.00000000	1.90777778	16.84424218	0.404151
19	-0.11987992	8.82771870	-1.05826621		19.00000000	1.80736842	15.95494001	0.425631
20	-0.11007757	8.83365350	-0.97238711		20.00000000	1.71700000	15.16738306	0.447002
21	-0.09990531	8.81922250	-0.88108718		21.00000000	1.63523810	14.42152860	0.468393
22	-0.09007989	8.83311080	-0.79568564		22.00000000	1.56090909	13.78768295	0.489742
23	-0.07993218	8.81960300	-0.70497012		23.00000000	1.49304348	13.16805074	0.511231
24	-0.07010676	8.82698820	-0.61883154		24.00000000	1.43083333	12.62994895	0.532616
25	-0.05997990	8.83911420	-0.53016916		25.00000000	1.37360000	12.14140727	0.553992
26	-0.04982996	8.82029440	-0.43951492		26.00000000	1.32076923	11.64957345	0.575473
27	-0.04002984	8.82225130	-0.35315333		27.00000000	1.27185185	11.22059665	0.596942
28	-0.02987023	8.82463170	-0.26359377		28.00000000	1.22642857	10.82278045	0.618333
29	-0.02007235	8.81187440	-0.17687498		29.00000000	1.18413793	10.43447472	0.639721
30	-0.00992762	8.83770850	-0.08773740		30.00000000	1.14466667	10.11623033	0.661066
31	-0.00066562	8.81891060	-0.00587009		31.00000000	1.10774194	9.76907710	0.682669
32	0.00947592	8.82095620	0.08358665		32.00000000	1.07312500	9.46598862	0.704053
33	0.01930329	8.83627320	0.17056918		33.00000000	1.04060606	9.19507945	0.725454
34	0.02944401	8.81930260	0.25967563		34.00000000	1.01000000	8.90749563	0.746797
35	0.03928329	8.83495520	0.34706614		35.00000000	0.98114286	8.66835319	0.768274
36	0.04941285	8.82274910	0.43595715		36.00000000	0.95388889	8.41592234	0.789653
37	0.05922832	8.84139160	0.52366074		37.00000000	0.92810811	8.20576723	0.811042
38	0.06939136	8.82347970	0.61227321		38.00000000	0.90368421	7.97363929	0.832406
39	0.07952686	8.83455280	0.70258428		39.00000000	0.88051282	7.77893700	0.853888
40	0.08935648	8.82012370	0.78813516		40.00000000	0.85850000	7.57207620	0.875274
41	0.09950315	8.82788750	0.87840257		41.00000000	0.83756098	7.39389407	0.896671
42	0.10931861	8.82297610	0.96451548		42.00000000	0.81761905	7.21383332	0.918167
43	0.11947049	8.83370490	1.05536705		43.00000000	0.79860465	7.05463782	0.939554
44	0.12929787	8.81778050	1.14012024		44.00000000	0.78045455	6.88187687	0.960897
45	0.13944602	8.82949640	1.23123813		45.00000000	0.76311111	6.73788681	0.982270
46	0.14926074	8.81678300	1.31599955		46.00000000	0.74652174	6.58192018	1.003765
47	0.15941115	8.81785770	1.40566484		47.00000000	0.73063830	6.44266454	1.025138
48	0.16955781	8.83473300	1.49799798		48.00000000	0.71541667	6.32051523	1.046480
49	0.17937626	8.82194810	1.58244806		49.00000000	0.70081633	6.18256526	1.067856
50	0.18953037	8.82185940	1.67201028		50.00000000	0.68680000	6.05885304	1.089348
51	0.19931458	8.81457330	1.75687298		51.00000000	0.67333333	5.93514602	1.110723
52	0.20945604	8.81535720	1.84642981		52.00000000	0.66038462	5.82152627	1.132088
53	0.21928491	8.82868000	1.93599630		53.00000000	0.64792453	5.72031832	1.153466
54	0.22942264	8.82513520	2.02468582		54.00000000	0.63592593	5.61213227	1.174942
55	0.23924406	8.82971950	2.11245794		55.00000000	0.62436364	5.51295578	1.196344
56	0.24939966	8.82433800	2.20078690		56.00000000	0.61321429	5.41121012	1.217689
57	0.25954187	8.82338140	2.29003691		57.00000000	0.60245614	5.31570030	1.239060
58	0.26936999	8.83202930	2.37908364		58.00000000	0.59206897	5.22917045	1.260537
59	0.27950549	8.82128330	2.46559711		59.00000000	0.58203390	5.13428591	1.281906
60	0.28932765	8.82472800	2.55323781		60.00000000	0.57233333	5.05068599	1.303272
61	0.29947433	8.82755180	2.64362516		61.00000000	0.56295082	4.96947752	1.324647
62	0.30928236	8.82544900	2.72955569		62.00000000	0.55387097	4.88815998	1.346114
63	0.31944987	8.82479480	2.81907955		63.00000000	0.54507937	4.81021355	1.367503
64	0.32925940	8.81634520	2.90286453		64.00000000	0.53656250	4.73052022	1.388865
65	0.33940381	8.80793950	2.98944822		65.00000000	0.52830769	4.65330219	1.410227
66	0.34922004	8.82634350	3.08233603		66.00000000	0.52030303	4.59237327	1.431704
67	0.35937265	8.82909390	3.17293487		67.00000000	0.51253731	4.52524007	1.453081
68	0.36954463	8.83022210	3.26316116		68.00000000	0.50500000	4.45926216	1.474459
69	0.37935415	8.81719490	3.34483948		69.00000000	0.49768116	4.38815178	1.495825
70	0.38949785	8.80933950	3.43121880		70.00000000	0.49057143	4.32161026	1.517314
71	0.39930734	8.81228160	3.51880873		71.00000000	0.48366197	4.26216549	1.538732
72	0.40948677	8.81547930	3.60982214		72.00000000	0.47694444	4.20449388	1.560120
73	0.41926429	8.81014920	3.69378095		73.00000000	0.47041096	4.14439073	1.581602
74	0.42943776	8.81429290	3.78519020		74.00000000	0.46405405	4.09030835	1.602990
75	0.43927479	8.81639190	3.87281870		75.00000000	0.45786667	4.03673197	1.624351
76	0.44943115	8.80352210	3.95657706		76.00000000	0.45184211	3.97780196	1.645719
77	0.45954806	8.79184820	4.04027678		77.00000000	0.44597403	3.92093594	1.667203
78	0.46941486	8.79121400	4.12672649		78.00000000	0.44025641	3.87038832	1.688575
79	0.47956824	8.77317330	4.20733528		79.00000000	0.43468354	3.81355406	1.709919
80	0.48939785	8.76479910	4.28947384		80.00000000	0.42925000	3.76229001	1.731301
81	0.49952441	8.72782040	4.35975934		81.00000000	0.42395062	3.70016485	1.752778
82	0.50934809	8.69840150	4.43051419		82.00000000	0.41878049	3.64272082	1.774146
83	0.51945978	8.65393450	4.49537091		83.00000000	0.41373494	3.58043507	1.795499
84	0.52926481	8.57082270	4.53623485		84.00000000	0.40880952	3.50383395	1.816876
85	0.53937203	8.46712880	4.56693245		85.00000000	0.40400000	3.42072004	1.838352
86	0.54951501	8.30212780	4.56214384		86.00000000	0.39930233	3.31505894	1.859728
87	0.55935353	8.11900230	4.54139260		87.00000000	0.39471264	3.20467286	1.881087
88	0.56943840	7.81359150	4.44935904		88.00000000	0.39022727	3.04907650	1.902468
89	0.57924867	7.42023320	4.29816021		89.00000000	0.38584270	2.86304279	1.923955
90	0.58936709	6.90508370	4.06962909		90.00000000	0.38155556	2.63467305	1.945320
91	0.59916097	6.22815850	3.73166949		91.00000000	0.37736264	2.35027432	1.966673
92	0.60926223	5.35129980	3.26034485		92.00000000	0.37326087	1.99743082	1.988130
93	0.61906654	4.29916570	2.66146963		93.00000000	0.36924731	1.58745538	2.009634
94	0.62917525	2.98682050	1.87923353		94.00000000	0.36531915	1.09114272	2.031018
95	0.63928169	1.41169740	0.90247230		95.00000000	0.36147368	0.51029146	2.052380
96	0.64901978	-0.34191167	-0.22190744		96.00000000	0.35770833	-0.12230465	2.073792
97	0.65908533	-2.41894820	-1.59429327		97.00000000	0.35402062	-0.85635754	2.095288
98	0.66884792	-4.71935320	-3.15652957		98.00000000	0.35040816	-1.65369989	2.116682
99	0.67908913	-7.41707610	-5.03685576		99.00000000	0.34686869	-2.57275145	2.138069
100	0.68773985	-9.99253650	-6.87226555		100.00000000	0.34340000	-3.43143703	2.159432
101	0.68773091	-10.00026400	-6.87749066		101.00000000	0.34000000	-3.40008976	2.180912
