# Supplementary material for: Study on the Electrical Injection Regeneration of Industrialized B-Doped Czochralski Silicon PERC Solar Cells
Source: Hindawi journal article supplement (doi:10.1155/2019/5357370), 2019-06-20
Supplement: f1 [file 5357370.f1.zip › section3.2/IVRawData_1-2-30min.csv]

13:02 02/04/2018
Test Lot:	JK-PERC
Recipe:	Recipe_YJX-LID
Cell Name:	1-2-30min
Test Order:	2
Test Condition:	Light
1	-0.29991090	8.82606320	-2.64703256		1.00000000	34.34000000	303.08701029	0.000000
2	-0.29010767	8.82056710	-2.55891417		2.00000000	17.17000000	151.44913711	0.061723
3	-0.27996653	8.83093930	-2.47236743		3.00000000	11.44666667	101.08481852	0.083229
4	-0.27012238	8.81844140	-2.38205838		4.00000000	8.58500000	75.70631942	0.104620
5	-0.25997972	8.82981590	-2.29557307		5.00000000	6.86800000	60.64317560	0.126036
6	-0.24984083	8.82540890	-2.20494748		6.00000000	5.72333333	50.51075694	0.147422
7	-0.24003685	8.81564900	-2.11608062		7.00000000	4.90571429	43.24705524	0.168906
8	-0.22988380	8.84043310	-2.03227235		8.00000000	4.29250000	37.94755908	0.190275
9	-0.22006345	8.81381890	-1.93959939		9.00000000	3.81555556	33.62961567	0.211692
10	-0.20993644	8.83218960	-1.85419844		10.00000000	3.43400000	30.32973909	0.233082
11	-0.20007963	8.82274340	-1.76525124		11.00000000	3.12181818	27.54300076	0.254567
12	-0.18995114	8.83314230	-1.67786545		12.00000000	2.86166667	25.27750888	0.275937
13	-0.18018512	8.83174230	-1.59134855		13.00000000	2.64153846	23.32938697	0.297283
14	-0.16999783	8.82391830	-1.50004696		14.00000000	2.45285714	21.64381103	0.318659
15	-0.16018566	8.81167410	-1.41150383		15.00000000	2.28933333	20.17285924	0.340138
16	-0.15002666	8.83115290	-1.32490837		16.00000000	2.14625000	18.95386191	0.361516
17	-0.13990487	8.82080750	-1.23407393		17.00000000	2.02000000	17.81803115	0.382889
18	-0.13006741	8.81692600	-1.14679473		18.00000000	1.90777778	16.82073549	0.404242
19	-0.11992328	8.82729430	-1.05859809		19.00000000	1.80736842	15.95417296	0.425725
20	-0.11009996	8.82259850	-0.97136774		20.00000000	1.71700000	15.14840162	0.447092
21	-0.09997816	8.82024000	-0.88183140		21.00000000	1.63523810	14.42319246	0.468489
22	-0.09013102	8.81966780	-0.79492567		22.00000000	1.56090909	13.76669965	0.489839
23	-0.08000625	8.82631300	-0.70616020		23.00000000	1.49304348	13.17806906	0.511310
24	-0.07014943	8.80850700	-0.61791174		24.00000000	1.43083333	12.60350543	0.532692
25	-0.05999787	8.83296010	-0.52995877		25.00000000	1.37360000	12.13295399	0.554073
26	-0.04988501	8.82457260	-0.44021387		26.00000000	1.32076923	11.65522396	0.575551
27	-0.04002521	8.82629490	-0.35327432		27.00000000	1.27185185	11.22573951	0.596934
28	-0.02986918	8.82331750	-0.26354526		28.00000000	1.22642857	10.82116868	0.618289
29	-0.02005776	8.82238290	-0.17695727		29.00000000	1.18413793	10.44691823	0.639665
30	-0.00994490	8.82701590	-0.08778382		30.00000000	1.14466667	10.10399087	0.661150
31	-0.00068576	8.82170390	-0.00604957		31.00000000	1.10774194	9.77217135	0.682648
32	0.00948793	8.81778910	0.08366252		32.00000000	1.07312500	9.46258993	0.703993
33	0.01926111	8.82966610	0.17006913		33.00000000	1.04060606	9.18820406	0.725378
34	0.02944885	8.81550220	0.25960638		34.00000000	1.01000000	8.90365722	0.746882
35	0.03928157	8.83105750	0.34689779		35.00000000	0.98114286	8.66452899	0.768279
36	0.04942317	8.81668090	0.43574831		36.00000000	0.95388889	8.41013395	0.789623
37	0.05920007	8.81961440	0.52212180		37.00000000	0.92810811	8.18555564	0.810996
38	0.06936474	8.82359310	0.61204625		38.00000000	0.90368421	7.97374176	0.832473
39	0.07949294	8.83013820	0.70193365		39.00000000	0.88051282	7.77504989	0.853845
40	0.08932938	8.82054040	0.78793344		40.00000000	0.85850000	7.57243393	0.875204
41	0.09950150	8.82147500	0.87774998		41.00000000	0.83756098	7.38852321	0.896588
42	0.10930743	8.82016370	0.96410943		42.00000000	0.81761905	7.21153384	0.918057
43	0.11947434	8.83151340	1.05513923		43.00000000	0.79860465	7.05288768	0.939436
44	0.12926464	8.81629180	1.13963479		44.00000000	0.78045455	6.88071501	0.960797
45	0.13943452	8.81985000	1.22979155		45.00000000	0.76311111	6.73052553	0.982163
46	0.14924937	8.82157040	1.31661382		46.00000000	0.74652174	6.58549408	1.003638
47	0.15939915	8.81785390	1.40555842		47.00000000	0.73063830	6.44266176	1.025024
48	0.16952588	8.81529520	1.49442068		48.00000000	0.71541667	6.30660911	1.046384
49	0.17936231	8.82900520	1.58359077		49.00000000	0.70081633	6.18751099	1.067756
50	0.18949275	8.81504150	1.67038646		50.00000000	0.68680000	6.05417050	1.089230
51	0.19928156	8.81860830	1.75738602		51.00000000	0.67333333	5.93786292	1.110609
52	0.20943655	8.83521840	1.85041766		52.00000000	0.66038462	5.83464230	1.132002
53	0.21924174	8.81606480	1.93284939		53.00000000	0.64792453	5.71214463	1.153344
54	0.22939971	8.80980680	2.02096713		54.00000000	0.63592593	5.60238455	1.174812
55	0.23926295	8.83374120	2.11358698		55.00000000	0.62436364	5.51546678	1.196183
56	0.24938817	8.81493660	2.19834091		56.00000000	0.61321429	5.40544505	1.217571
57	0.25953424	8.82551190	2.29052252		57.00000000	0.60245614	5.31698384	1.239043
58	0.26932305	8.82010840	2.37545850		58.00000000	0.59206897	5.22211246	1.260441
59	0.27952194	8.82029530	2.46546605		59.00000000	0.58203390	5.13371086	1.281787
60	0.28934723	8.81991670	2.55201847		60.00000000	0.57233333	5.04793232	1.303160
61	0.29946205	8.82069400	2.64146311		61.00000000	0.56295082	4.96561692	1.324647
62	0.30931112	8.80949970	2.72487622		62.00000000	0.55387097	4.87932612	1.346010
63	0.31943712	8.82309250	2.81842326		63.00000000	0.54507937	4.80928566	1.367366
64	0.32926610	8.81522370	2.90255433		64.00000000	0.53656250	4.72991847	1.388740
65	0.33939132	8.81390860	2.99136407		65.00000000	0.52830769	4.65645571	1.410208
66	0.34923297	8.81938740	3.08002086		66.00000000	0.52030303	4.58875399	1.431592
67	0.35939467	8.81293580	3.16732215		67.00000000	0.51253731	4.51695844	1.452933
68	0.36954373	8.81837650	3.25877574		68.00000000	0.50500000	4.45328013	1.474309
69	0.37936008	8.81233020	3.34304629		69.00000000	0.49768116	4.38573071	1.495805
70	0.38949123	8.82206250	3.43611597		70.00000000	0.49057143	4.32785180	1.517192
71	0.39932770	8.80659390	3.51671689		71.00000000	0.48366197	4.25941457	1.538533
72	0.40944844	8.81183430	3.60799181		72.00000000	0.47694444	4.20275541	1.559909
73	0.41925734	8.81464290	3.69560374		73.00000000	0.47041096	4.14650462	1.581383
74	0.42942351	8.81458280	3.78518909		74.00000000	0.46405405	4.09044288	1.602757
75	0.43924060	8.79996680	3.86530270		75.00000000	0.45786667	4.02921147	1.624112
76	0.44940528	8.79898260	3.95430924		76.00000000	0.45184211	3.97575082	1.645493
77	0.45953795	8.80012890	4.04399319		77.00000000	0.44597403	3.92462891	1.666965
78	0.46938926	8.77804850	4.12032169		78.00000000	0.44025641	3.86459212	1.688333
79	0.47954354	8.77133940	4.20623915		79.00000000	0.43468354	3.81275690	1.709699
80	0.48934424	8.75005820	4.28179058		80.00000000	0.42925000	3.75596248	1.731067
81	0.49948213	8.73273370	4.36184443		81.00000000	0.42395062	3.70224784	1.752533
82	0.50927913	8.68088630	4.42099422		82.00000000	0.41878049	3.63538580	1.773907
83	0.51944453	8.62832740	4.48193747		83.00000000	0.41373494	3.56984052	1.795289
84	0.52921993	8.56487750	4.53270387		84.00000000	0.40880952	3.50140349	1.816635
85	0.53934664	8.45656390	4.56101933		85.00000000	0.40400000	3.41645182	1.838106
86	0.54948753	8.28912830	4.55477264		86.00000000	0.39930233	3.30986821	1.859477
87	0.55933142	8.09574990	4.52820729		87.00000000	0.39471264	3.19549485	1.880854
88	0.56942087	7.79246000	4.43718935		88.00000000	0.39022727	3.04083041	1.902346
89	0.57925439	7.40784980	4.29102952		89.00000000	0.38584270	2.85826474	1.923738
90	0.58935726	6.86161950	4.04394527		90.00000000	0.38155556	2.61808904	1.945080
91	0.59917063	6.19097760	3.70945195		91.00000000	0.37736264	2.33624363	1.966462
92	0.60927874	5.31371310	3.23753242		92.00000000	0.37326087	1.98340117	1.988012
93	0.61909133	4.25647830	2.63514881		93.00000000	0.36924731	1.57169317	2.009414
94	0.62917119	2.94295760	1.85162414		94.00000000	0.36531915	1.07511877	2.030774
95	0.63923985	1.38404440	0.88473633		95.00000000	0.36147368	0.50029563	2.052151
96	0.64902568	-0.36325100	-0.23575923		96.00000000	0.35770833	-0.12993791	2.073635
97	0.65913081	-2.42126660	-1.59593142		97.00000000	0.35402062	-0.85717830	2.095024
98	0.66884446	-4.68869690	-3.13600895		98.00000000	0.35040816	-1.64295767	2.116374
99	0.67910439	-7.34822180	-4.99020968		99.00000000	0.34686869	-2.54886805	2.137752
100	0.68814367	-9.98938560	-6.87413247		100.00000000	0.34340000	-3.43035502	2.159252
101	0.68812585	-10.00016800	-6.88137411		101.00000000	0.34000000	-3.40005712	2.180629
13:02 02/04/2018
Test Lot:	JK-PERC
Recipe:	Recipe_YJX-LID
Cell Name:	1-2-30min
Test Order:	3
Test Condition:	Light
1	-0.29992157	8.82007220	-2.64532990		1.00000000	34.34000000	302.88127935	0.000000
2	-0.29012001	8.82240010	-2.55955481		2.00000000	17.17000000	151.48060972	0.061805
3	-0.27998576	8.82495880	-2.47086280		3.00000000	11.44666667	101.01636173	0.083221
4	-0.27014476	8.82540610	-2.38413721		4.00000000	8.58500000	75.76611137	0.104719
5	-0.26002836	8.82088470	-2.29368018		5.00000000	6.86800000	60.58183612	0.126155
6	-0.24986807	8.83027360	-2.20640342		6.00000000	5.72333333	50.53859924	0.147525
7	-0.24003525	8.83113670	-2.11978411		7.00000000	4.90571429	43.32303347	0.168909
8	-0.22987792	8.82864860	-2.02951138		8.00000000	4.29250000	37.89697412	0.190409
9	-0.22005554	8.82236190	-1.94140961		9.00000000	3.81555556	33.66221196	0.211789
10	-0.20991160	8.82226470	-1.85189570		10.00000000	3.43400000	30.29565698	0.233136
11	-0.20008473	8.83301070	-1.76735056		11.00000000	3.12181818	27.57505340	0.254520
12	-0.18995197	8.81856540	-1.67510387		12.00000000	2.86166667	25.23579465	0.276009
13	-0.18017349	8.82616520	-1.59024099		13.00000000	2.64153846	23.31465484	0.297398
14	-0.16998118	8.82581810	-1.50022298		14.00000000	2.45285714	21.64847097	0.318746
15	-0.16019452	8.81910900	-1.41277293		15.00000000	2.28933333	20.18988020	0.340119
16	-0.15001412	8.83155540	-1.32485801		16.00000000	2.14625000	18.95472578	0.361594
17	-0.13988432	8.81771560	-1.23346015		17.00000000	2.02000000	17.81178551	0.382969
18	-0.13005300	8.81777760	-1.14677843		18.00000000	1.90777778	16.82236015	0.404359
19	-0.11989790	8.82264520	-1.05781663		19.00000000	1.80736842	15.94577032	0.425717
20	-0.11008295	8.82034590	-0.97096970		20.00000000	1.71700000	15.14453391	0.447204
21	-0.09994349	8.81966970	-0.88146856		21.00000000	1.63523810	14.42225988	0.468589
22	-0.09011290	8.81993870	-0.79479027		22.00000000	1.56090909	13.76712250	0.489974
23	-0.07996599	8.81943610	-0.70525497		23.00000000	1.49304348	13.16780155	0.511392
24	-0.07013691	8.82002830	-0.61860949		24.00000000	1.43083333	12.61999049	0.532856
25	-0.05999371	8.82685090	-0.52955557		25.00000000	1.37360000	12.12456240	0.554248
26	-0.04982672	8.82116700	-0.43952977		26.00000000	1.32076923	11.65072595	0.575613
27	-0.04000060	8.82307240	-0.35292815		27.00000000	1.27185185	11.22164097	0.596973
28	-0.02986634	8.82600500	-0.26360048		28.00000000	1.22642857	10.82446470	0.618484
29	-0.02009084	8.82100680	-0.17722141		29.00000000	1.18413793	10.44528874	0.639873
30	-0.00992309	8.81826110	-0.08750440		30.00000000	1.14466667	10.09396954	0.661261
31	-0.00067826	8.82557960	-0.00598606		31.00000000	1.10774194	9.77646463	0.682742
32	0.00948630	8.81367020	0.08360911		32.00000000	1.07312500	9.45816983	0.704225
33	0.01930990	8.82738490	0.17045595		33.00000000	1.04060606	9.18583023	0.725615
34	0.02940517	8.81792740	0.25929263		34.00000000	1.01000000	8.90610667	0.746998
35	0.03926152	8.83075620	0.34670891		35.00000000	0.98114286	8.66423337	0.768350
36	0.04940888	8.79804800	0.43470169		36.00000000	0.95388889	8.39236023	0.789824
37	0.05923323	8.85567280	0.52455010		37.00000000	0.92810811	8.21902173	0.811195
38	0.06936719	8.81231500	0.61128556		38.00000000	0.90368421	7.96354992	0.832576
39	0.07950488	8.82393740	0.70154606		39.00000000	0.88051282	7.76959001	0.854061
40	0.08934188	8.82333470	0.78829330		40.00000000	0.85850000	7.57483284	0.875450
41	0.09949520	8.82176110	0.87772284		41.00000000	0.83756098	7.38876283	0.896849
42	0.10930987	8.82669730	0.96484513		42.00000000	0.81761905	7.21687584	0.918228
43	0.11946691	8.82587810	1.05440038		43.00000000	0.79860465	7.04838730	0.939701
44	0.12927414	8.83093450	1.14161146		44.00000000	0.78045455	6.89214297	0.961099
45	0.13943490	8.81571960	1.22921898		45.00000000	0.76311111	6.72737358	0.982446
46	0.14925998	8.82982350	1.31793928		46.00000000	0.74652174	6.59165520	1.003811
47	0.15942074	8.81549740	1.40537312		47.00000000	0.73063830	6.44094002	1.025304
48	0.16954727	8.82283880	1.49588823		48.00000000	0.71541667	6.31200592	1.046690
49	0.17937459	8.82204630	1.58245094		49.00000000	0.70081633	6.18263408	1.068041
50	0.18952046	8.82348820	1.67223154		50.00000000	0.68680000	6.05997170	1.089429
51	0.19930314	8.82431600	1.75871389		51.00000000	0.67333333	5.94170611	1.110904
52	0.20943561	8.81739040	1.84667554		52.00000000	0.66038462	5.82286897	1.132298
53	0.21928304	8.82420060	1.93499753		53.00000000	0.64792453	5.71741601	1.153654
54	0.22941403	8.80828670	2.02074455		54.00000000	0.63592593	5.60141788	1.175031
55	0.23922497	8.83051590	2.11247990		55.00000000	0.62436364	5.51345302	1.196513
56	0.24940062	8.81264210	2.19787840		56.00000000	0.61321429	5.40403803	1.217898
57	0.25952640	8.82005020	2.28903588		57.00000000	0.60245614	5.31369340	1.239245
58	0.26933885	8.82723810	2.37751816		58.00000000	0.59206897	5.22633373	1.260627
59	0.27951300	8.80786900	2.46191389		59.00000000	0.58203390	5.12647833	1.282112
60	0.28934702	8.82750510	2.55421229		60.00000000	0.57233333	5.05227542	1.303496
61	0.29949141	8.82171440	2.64202768		61.00000000	0.56295082	4.96619135	1.324879
62	0.30931056	8.81882570	2.72775592		62.00000000	0.55387097	4.88449152	1.346243
63	0.31943929	8.82465460	2.81894140		63.00000000	0.54507937	4.81013713	1.367718
64	0.32924354	8.79856010	2.89686907		64.00000000	0.53656250	4.72097740	1.389108
65	0.33940282	8.83752540	2.99948104		65.00000000	0.52830769	4.66893265	1.410496
66	0.34922197	8.81142230	3.07714225		66.00000000	0.52030303	4.58460972	1.431831
67	0.35938495	8.81895070	3.16939816		67.00000000	0.51253731	4.52004130	1.453303
68	0.36952487	8.81213280	3.25630223		68.00000000	0.50500000	4.45012706	1.474674
69	0.37933359	8.81654070	3.34441004		69.00000000	0.49768116	4.38782620	1.496065
70	0.38948393	8.81576820	3.43360004		70.00000000	0.49057143	4.32476400	1.517552
71	0.39931497	8.82058910	3.52219327		71.00000000	0.48366197	4.26618352	1.538934
72	0.40947500	8.80755040	3.60647170		72.00000000	0.47694444	4.20071223	1.560293
73	0.41928297	8.81415080	3.69562333		73.00000000	0.47041096	4.14627313	1.581674
74	0.42942289	8.80401230	3.78064441		74.00000000	0.46405405	4.08553760	1.603158
75	0.43924648	8.81276040	3.87097398		75.00000000	0.45786667	4.03506923	1.624561
76	0.44941619	8.79020400	3.95045999		76.00000000	0.45184211	3.97178428	1.645913
77	0.45953748	8.78314780	4.03618561		77.00000000	0.44597403	3.91705579	1.667298
78	0.46940798	8.79053780	4.12634859		78.00000000	0.44025641	3.87009062	1.688786
79	0.47954196	8.76660440	4.20395466		79.00000000	0.43468354	3.81069867	1.710161
80	0.48935291	8.75601390	4.28478088		80.00000000	0.42925000	3.75851897	1.731514
81	0.49949431	8.72590540	4.35854010		81.00000000	0.42395062	3.69935298	1.752894
82	0.50930673	8.70053390	4.43124047		82.00000000	0.41878049	3.64361383	1.774382
83	0.51945484	8.62962340	4.48269964		83.00000000	0.41373494	3.57037672	1.795770
84	0.52925313	8.57333370	4.53746370		84.00000000	0.40880952	3.50486047	1.817128
85	0.53934991	8.45616340	4.56083097		85.00000000	0.40400000	3.41629001	1.838504
86	0.54949206	8.30789660	4.56512322		86.00000000	0.39930233	3.31736243	1.859981
87	0.55933130	8.10692690	4.53445796		87.00000000	0.39471264	3.19990655	1.881360
88	0.56941837	7.80471040	4.44414547		88.00000000	0.39022727	3.04561085	1.902705
89	0.57925314	7.42739200	4.30234014		89.00000000	0.38584270	2.86580496	1.924088
90	0.58938783	6.89496760	4.06380999		90.00000000	0.38155556	2.63081319	1.945574
91	0.59916234	6.21652790	3.72470940		91.00000000	0.37736264	2.34588536	1.966945
92	0.60929108	5.34629580	3.25745034		92.00000000	0.37326087	1.99556302	1.988430
93	0.61909014	4.29031750	2.65609326		93.00000000	0.36924731	1.58418820	2.009810
94	0.62917423	2.96447710	1.86517260		94.00000000	0.36531915	1.08298025	2.031299
95	0.63931936	1.38680920	0.88661397		95.00000000	0.36147368	0.50129503	2.052702
96	0.64901346	-0.37610120	-0.24409474		96.00000000	0.35770833	-0.13453453	2.074081
97	0.65912211	-2.45523070	-1.61829684		97.00000000	0.35402062	-0.86920229	2.095421
98	0.66887355	-4.75930980	-3.18337644		98.00000000	0.35040816	-1.66770101	2.116898
99	0.67907226	-7.46711160	-5.07070835		99.00000000	0.34686869	-2.59010720	2.138323
100	0.68759191	-9.99285980	-6.87100956		100.00000000	0.34340000	-3.43154806	2.159756
101	0.68758297	-10.00018600	-6.87595759		101.00000000	0.34000000	-3.40006324	2.181253
13:02 02/04/2018
Test Lot:	JK-PERC
Recipe:	Recipe_YJX-LID
Cell Name:	1-2-30min
Test Order:	4
Test Condition:	Light
1	-0.29989713	8.81937500	-2.64490525		1.00000000	34.34000000	302.85733750	0.000000
2	-0.29009387	8.83028130	-2.56161048		2.00000000	17.17000000	151.61592992	0.061802
3	-0.27994826	8.83587840	-2.47358878		3.00000000	11.44666667	101.14135475	0.083228
4	-0.27013385	8.80132010	-2.37753448		4.00000000	8.58500000	75.55933306	0.104724
5	-0.25998154	8.84051900	-2.29837174		5.00000000	6.86800000	60.71668449	0.126111
6	-0.24980539	8.82727720	-2.20510142		6.00000000	5.72333333	50.52144984	0.147462
7	-0.24004309	8.82855220	-2.11923295		7.00000000	4.90571429	43.31035465	0.168829
8	-0.22987364	8.83081820	-2.02997232		8.00000000	4.29250000	37.90628712	0.190335
9	-0.22006668	8.81647970	-1.94021342		9.00000000	3.81555556	33.63976810	0.211711
10	-0.20991661	8.82961650	-1.85348316		10.00000000	3.43400000	30.32090306	0.233140
11	-0.20008358	8.82087900	-1.76491305		11.00000000	3.12181818	27.53718044	0.254508
12	-0.18992382	8.82835010	-1.67671398		12.00000000	2.86166667	25.26379520	0.275997
13	-0.18014961	8.82024480	-1.58896366		13.00000000	2.64153846	23.29901588	0.297366
14	-0.17000473	8.82895950	-1.50096488		14.00000000	2.45285714	21.65617637	0.318755
15	-0.16020894	8.81990430	-1.41302752		15.00000000	2.28933333	20.19170091	0.340152
16	-0.15005587	8.82722000	-1.32457618		16.00000000	2.14625000	18.94542093	0.361611
17	-0.13989983	8.80991940	-1.23250623		17.00000000	2.02000000	17.79603719	0.382983
18	-0.13009064	8.83452800	-1.14928940		18.00000000	1.90777778	16.85431620	0.404365
19	-0.11994576	8.81995390	-1.05791607		19.00000000	1.80736842	15.94090615	0.425853
20	-0.11009786	8.83442970	-0.97265180		20.00000000	1.71700000	15.16871579	0.447228
21	-0.09994256	8.82606700	-0.88209971		21.00000000	1.63523810	14.43272099	0.468566
22	-0.09010806	8.82274910	-0.79500080		22.00000000	1.56090909	13.77150928	0.489949
23	-0.07994904	8.82611370	-0.70563928		23.00000000	1.49304348	13.17777150	0.511428
24	-0.07013314	8.82561970	-0.61896844		24.00000000	1.43083333	12.62799085	0.532804
25	-0.05997412	8.82547470	-0.52930011		25.00000000	1.37360000	12.12267205	0.554169
26	-0.04986721	8.82609180	-0.44013253		26.00000000	1.32076923	11.65723048	0.575541
27	-0.04001112	8.82193850	-0.35297563		27.00000000	1.27185185	11.22019882	0.597017
28	-0.02984763	8.82616230	-0.26344005		28.00000000	1.22642857	10.82465762	0.618403
29	-0.02001909	8.81941320	-0.17655659		29.00000000	1.18413793	10.44340170	0.639754
30	-0.00990175	8.82504080	-0.08738333		30.00000000	1.14466667	10.10173004	0.661129
31	-0.00066492	8.81613920	-0.00586206		31.00000000	1.10774194	9.76600710	0.682727
32	0.00950282	8.83421420	0.08394994		32.00000000	1.07312500	9.48021611	0.704102
33	0.01929238	8.82923130	0.17033692		33.00000000	1.04060606	9.18775160	0.725456
34	0.02947121	8.82578850	0.26010666		34.00000000	1.01000000	8.91404639	0.746841
35	0.03926375	8.82364560	0.34644942		35.00000000	0.98114286	8.65725685	0.768316
36	0.04941876	8.81630900	0.43569105		36.00000000	0.95388889	8.40977920	0.789711
37	0.05924107	8.82356550	0.52271747		37.00000000	0.92810811	8.18922268	0.811055
38	0.06937598	8.82511620	0.61225112		38.00000000	0.90368421	7.97511817	0.832422
39	0.07952131	8.81706520	0.70114460		39.00000000	0.88051282	7.76353895	0.853899
40	0.08936745	8.81964870	0.78818951		40.00000000	0.85850000	7.57166841	0.875279
41	0.09949640	8.82453160	0.87800914		41.00000000	0.83756098	7.39108330	0.896659
42	0.10931723	8.82100200	0.96428750		42.00000000	0.81761905	7.21221925	0.918020
43	0.11943205	8.81728080	1.05306592		43.00000000	0.79860465	7.04152146	0.939520
44	0.12929232	8.82000260	1.14035860		44.00000000	0.78045455	6.88361112	0.960910
45	0.13942723	8.81785490	1.22944908		45.00000000	0.76311111	6.72900305	0.982299
46	0.14921829	8.81817150	1.31583247		46.00000000	0.74652174	6.58295672	1.003696
47	0.15938222	8.81972690	1.40570765		47.00000000	0.73063830	6.44403025	1.025164
48	0.16954467	8.82416630	1.49609036		48.00000000	0.71541667	6.31295564	1.046528
49	0.17937815	8.81864550	1.58187232		49.00000000	0.70081633	6.18025074	1.067904
50	0.18951158	8.83082010	1.67354267		50.00000000	0.68680000	6.06500724	1.089381
51	0.19927882	8.81205560	1.75605604		51.00000000	0.67333333	5.93345077	1.110752
52	0.20943531	8.83471200	1.85030065		52.00000000	0.66038462	5.83430789	1.132089
53	0.21924870	8.81741910	1.93320768		53.00000000	0.64792453	5.71302211	1.153471
54	0.22938509	8.82758240	2.02491578		54.00000000	0.63592593	5.61368851	1.174947
55	0.23922452	8.81891250	2.10970011		55.00000000	0.62436364	5.50620828	1.196316
56	0.24940409	8.82194140	2.20022827		56.00000000	0.61321429	5.40974049	1.217668
57	0.25951892	8.80787470	2.28581013		57.00000000	0.60245614	5.30635820	1.239045
58	0.26935834	8.82656570	2.37750908		58.00000000	0.59206897	5.22593562	1.260521
59	0.27949250	8.81910610	2.46487401		59.00000000	0.58203390	5.13301870	1.281921
60	0.28932673	8.82034490	2.55196155		60.00000000	0.57233333	5.04817740	1.303269
61	0.29946983	8.81198880	2.63892479		61.00000000	0.56295082	4.96071632	1.324650
62	0.30928320	8.83016590	2.73102197		62.00000000	0.55387097	4.89077253	1.346120
63	0.31945238	8.80591580	2.81307076		63.00000000	0.54507937	4.79992299	1.367489
64	0.32925680	8.82818130	2.90673872		64.00000000	0.53656250	4.73687103	1.388855
65	0.33943415	8.80181030	2.98763500		65.00000000	0.52830769	4.65006409	1.410221
66	0.34923637	8.83116340	3.08416345		66.00000000	0.52030303	4.59488108	1.431704
67	0.35936382	8.81494240	3.16777137		67.00000000	0.51253731	4.51798690	1.453095
68	0.36953446	8.82128910	3.25977030		68.00000000	0.50500000	4.45475100	1.474444
69	0.37935975	8.82128240	3.34643949		69.00000000	0.49768116	4.39018605	1.495819
70	0.38949764	8.81548020	3.43360873		70.00000000	0.49057143	4.32462272	1.517309
71	0.39932296	8.81417660	3.51970309		71.00000000	0.48366197	4.26308203	1.538685
72	0.40946826	8.81253620	3.60845386		72.00000000	0.47694444	4.20309018	1.560054
73	0.41928390	8.81271270	3.69502855		73.00000000	0.47041096	4.14559663	1.581418
74	0.42941061	8.79815390	3.77802063		74.00000000	0.46405405	4.08281899	1.602897
75	0.43926269	8.81177140	3.87068241		75.00000000	0.45786667	4.03461640	1.624288
76	0.44941920	8.80246260	3.95599570		76.00000000	0.45184211	3.97732323	1.645668
77	0.45954293	8.79181770	4.04021767		77.00000000	0.44597403	3.92092234	1.667033
78	0.46940097	8.77602200	4.11947324		78.00000000	0.44025641	3.86369994	1.688525
79	0.47951803	8.76155280	4.20132254		79.00000000	0.43468354	3.80850282	1.709904
80	0.48936638	8.75089070	4.28239170		80.00000000	0.42925000	3.75631983	1.731294
81	0.49946558	8.72132680	4.35600255		81.00000000	0.42395062	3.69741188	1.752788
82	0.50931621	8.69283100	4.42739974		82.00000000	0.41878049	3.64038801	1.774171
83	0.51943696	8.61648460	4.47572057		83.00000000	0.41373494	3.56494074	1.795520
84	0.52923471	8.56755450	4.53424722		84.00000000	0.40880952	3.50249788	1.816906
85	0.53935695	8.44935800	4.55721996		85.00000000	0.40400000	3.41354063	1.838376
86	0.54948664	8.29788970	4.55957953		86.00000000	0.39930233	3.31336665	1.859774
87	0.55930752	8.09505840	4.52762704		87.00000000	0.39471264	3.19522190	1.881119
88	0.56943196	7.78012420	4.43025137		88.00000000	0.39022727	3.03601665	1.902495
89	0.57926172	7.40316630	4.28837084		89.00000000	0.38584270	2.85645765	1.923981
90	0.58937430	6.85936210	4.04273174		90.00000000	0.38155556	2.61722772	1.945353
91	0.59915572	6.18875310	3.70802682		91.00000000	0.37736264	2.33540419	1.966704
92	0.60928762	5.30411530	3.23173179		92.00000000	0.37326087	1.97981869	1.988184
93	0.61909729	4.24257280	2.62656532		93.00000000	0.36924731	1.56655860	2.009687
94	0.62920392	2.93877480	1.84908862		94.00000000	0.36531915	1.07359071	2.031070
95	0.63931650	1.37080800	0.87638017		95.00000000	0.36147368	0.49551102	2.052438
96	0.64901674	-0.37482834	-0.24326987		96.00000000	0.35770833	-0.13407922	2.073819
97	0.65912861	-2.43320040	-1.60379200		97.00000000	0.35402062	-0.86140311	2.095295
98	0.66885489	-4.70339780	-3.14589062		98.00000000	0.35040816	-1.64810898	2.116685
99	0.67907614	-7.36758710	-5.00315261		99.00000000	0.34686869	-2.55558526	2.138030
100	0.68808717	-9.98948480	-6.87363633		100.00000000	0.34340000	-3.43038908	2.159447
101	0.68807232	-10.00023500	-6.88088490		101.00000000	0.34000000	-3.40007990	2.180940
