# Supplementary material for: Study on the Electrical Injection Regeneration of Industrialized B-Doped Czochralski Silicon PERC Solar Cells
Source: Hindawi journal article supplement (doi:10.1155/2019/5357370), 2019-06-20
Supplement: f1 [file 5357370.f1.zip › section3.2/IVRawData_1-2-40min.csv]

13:30 02/04/2018
Test Lot:	JK-PERC
Recipe:	Recipe_YJX-LID
Cell Name:	1-2-40min
Test Order:	2
Test Condition:	Light
1	-0.29986537	8.82071020	-2.64502553		1.00000000	34.34000000	302.90318827	0.000000
2	-0.29004735	8.81347080	-2.55632385		2.00000000	17.17000000	151.32729364	0.061729
3	-0.27987504	8.82315540	-2.46938097		3.00000000	11.44666667	100.99571881	0.083244
4	-0.27006596	8.81559370	-2.38079178		4.00000000	8.58500000	75.68187191	0.104692
5	-0.25991452	8.82849410	-2.29465381		5.00000000	6.86800000	60.63409748	0.126067
6	-0.24976453	8.82652280	-2.20455232		6.00000000	5.72333333	50.51713216	0.147447
7	-0.23997554	8.82868580	-2.11866864		7.00000000	4.90571429	43.31101005	0.168942
8	-0.22979356	8.83027650	-2.02914067		8.00000000	4.29250000	37.90396188	0.190327
9	-0.21994206	8.82009120	-1.93990903		9.00000000	3.81555556	33.65354798	0.211700
10	-0.20981145	8.82522300	-1.85163283		10.00000000	3.43400000	30.30581578	0.233076
11	-0.20000087	8.81841560	-1.76369079		11.00000000	3.12181818	27.52949015	0.254558
12	-0.18984272	8.83235260	-1.67675784		12.00000000	2.86166667	25.27524902	0.275951
13	-0.18007828	8.82077690	-1.58843033		13.00000000	2.64153846	23.30042144	0.297318
14	-0.16992460	8.82626250	-1.49979912		14.00000000	2.45285714	21.64956102	0.318688
15	-0.16009840	8.81383610	-1.41108106		15.00000000	2.28933333	20.17780878	0.340173
16	-0.14991419	8.82733060	-1.32334212		16.00000000	2.14625000	18.94565830	0.361564
17	-0.13977836	8.82172680	-1.23308650		17.00000000	2.02000000	17.81988814	0.382929
18	-0.12996556	8.81858920	-1.14611288		18.00000000	1.90777778	16.82390851	0.404299
19	-0.11984015	8.81797980	-1.05674802		19.00000000	1.80736842	15.93733823	0.425778
20	-0.11007424	8.82377430	-0.97127025		20.00000000	1.71700000	15.15042047	0.447153
21	-0.09986398	8.82535840	-0.88133538		21.00000000	1.63523810	14.43156226	0.468530
22	-0.09006978	8.81574060	-0.79403180		22.00000000	1.56090909	13.76056965	0.489877
23	-0.07992725	8.81792160	-0.70479223		23.00000000	1.49304348	13.16554034	0.511344
24	-0.07007798	8.82568360	-0.61848606		24.00000000	1.43083333	12.62808228	0.532720
25	-0.05991535	8.82543470	-0.52877904		25.00000000	1.37360000	12.12261710	0.554112
26	-0.04977208	8.82501790	-0.43923950		26.00000000	1.32076923	11.65581210	0.575601
27	-0.03996300	8.81880470	-0.35242589		27.00000000	1.27185185	11.21621309	0.596976
28	-0.02979740	8.82589240	-0.26298863		28.00000000	1.22642857	10.82432661	0.618321
29	-0.01999948	8.81999780	-0.17639535		29.00000000	1.18413793	10.44409395	0.639708
30	-0.00987556	8.81649490	-0.08706781		30.00000000	1.14466667	10.09194783	0.661196
31	-0.00060535	8.82703690	-0.00534342		31.00000000	1.10774194	9.77807894	0.682700
32	0.00951018	8.82542990	0.08393141		32.00000000	1.07312500	9.47078946	0.704075
33	0.01935173	8.81957240	0.17067398		33.00000000	1.04060606	9.17770049	0.725449
34	0.02947759	8.82237430	0.26006237		34.00000000	1.01000000	8.91059804	0.746919
35	0.03930575	8.82351210	0.34681473		35.00000000	0.98114286	8.65712587	0.768289
36	0.04946957	8.80958940	0.43580662		36.00000000	0.95388889	8.40336944	0.789636
37	0.05927912	8.82661630	0.52323403		37.00000000	0.92810811	8.19205416	0.811022
38	0.06942582	8.81561370	0.61203122		38.00000000	0.90368421	7.96653091	0.832508
39	0.07959188	8.81464770	0.70157436		39.00000000	0.88051282	7.76141031	0.853894
40	0.08940217	8.81564040	0.78813737		40.00000000	0.85850000	7.56822728	0.875261
41	0.09955110	8.81515500	0.87755841		41.00000000	0.83756098	7.38322982	0.896644
42	0.10936065	8.81545540	0.96406393		42.00000000	0.81761905	7.20768425	0.918125
43	0.11951480	8.82426640	1.05463043		43.00000000	0.79860465	7.04710019	0.939509
44	0.12933105	8.82028010	1.14073609		44.00000000	0.78045455	6.88382770	0.960858
45	0.13950752	8.81329540	1.22952098		45.00000000	0.76311111	6.72552365	0.982221
46	0.14931409	8.82119270	1.31712836		46.00000000	0.74652174	6.58521212	1.003718
47	0.15945782	8.81711580	1.40595806		47.00000000	0.73063830	6.44212248	1.025091
48	0.16962387	8.81992910	1.49607051		48.00000000	0.71541667	6.30992428	1.046459
49	0.17942598	8.81427670	1.58151023		49.00000000	0.70081633	6.17718902	1.067835
50	0.18957119	8.82044320	1.67210191		50.00000000	0.68680000	6.05788039	1.089305
51	0.19933163	8.82342910	1.75878850		51.00000000	0.67333333	5.94110893	1.110701
52	0.20947163	8.82026290	1.84759485		52.00000000	0.66038462	5.82476592	1.132091
53	0.21929903	8.81945900	1.93409880		53.00000000	0.64792453	5.71434381	1.153436
54	0.22944872	8.81129930	2.02174135		54.00000000	0.63592593	5.60333367	1.174913
55	0.23926720	8.82108590	2.11059652		55.00000000	0.62436364	5.50756527	1.196296
56	0.24941018	8.81686690	2.19901636		56.00000000	0.61321429	5.40662874	1.217685
57	0.25957251	8.81852250	2.28904602		57.00000000	0.60245614	5.31277303	1.239170
58	0.26937461	8.82354740	2.37683964		58.00000000	0.59206897	5.22414858	1.260542
59	0.27954364	8.81418700	2.46394992		59.00000000	0.58203390	5.13015562	1.281889
60	0.28934574	8.81924340	2.55181051		60.00000000	0.57233333	5.04754697	1.303271
61	0.29950660	8.81940840	2.64147102		61.00000000	0.56295082	4.96489319	1.324759
62	0.30932358	8.82239060	2.72897344		62.00000000	0.55387097	4.88646602	1.346125
63	0.31947550	8.81627460	2.81658374		63.00000000	0.54507937	4.80556936	1.367493
64	0.32927760	8.82731720	2.90663782		64.00000000	0.53656250	4.73640739	1.388877
65	0.33942953	8.80019860	2.98704727		65.00000000	0.52830769	4.64921261	1.410386
66	0.34923908	8.81965730	3.08016900		66.00000000	0.52030303	4.58889442	1.431784
67	0.35939693	8.80474280	3.16439753		67.00000000	0.51253731	4.51275922	1.453129
68	0.36956745	8.81791310	3.25881366		68.00000000	0.50500000	4.45304612	1.474512
69	0.37936211	8.81908320	3.34562601		69.00000000	0.49768116	4.38909155	1.495999
70	0.38954976	8.80218120	3.42888757		70.00000000	0.49057143	4.31809861	1.517377
71	0.39937344	8.81356620	3.51990425		71.00000000	0.48366197	4.26278681	1.538735
72	0.40950453	8.80492590	3.60565704		72.00000000	0.47694444	4.19946049	1.560116
73	0.41934383	8.80297570	3.69147355		73.00000000	0.47041096	4.14101624	1.581593
74	0.42948681	8.80584430	3.78199398		74.00000000	0.46405405	4.08638775	1.602994
75	0.43929636	8.79649160	3.86426674		75.00000000	0.45786667	4.02762029	1.624341
76	0.44946167	8.79855250	3.95461210		76.00000000	0.45184211	3.97555648	1.645716
77	0.45959947	8.79290680	4.04121531		77.00000000	0.44597403	3.92140805	1.667196
78	0.46946928	8.77633190	4.12021822		78.00000000	0.44025641	3.86383638	1.688575
79	0.47958770	8.74917600	4.19599719		79.00000000	0.43468354	3.80312283	1.709950
80	0.48940843	8.75067520	4.28265421		80.00000000	0.42925000	3.75622733	1.731318
81	0.49950972	8.71850110	4.35497604		81.00000000	0.42395062	3.69621392	1.752795
82	0.50935870	8.68411540	4.42332973		82.00000000	0.41878049	3.63673808	1.774180
83	0.51949948	8.61226940	4.47406947		83.00000000	0.41373494	3.56319676	1.795563
84	0.52927405	8.56657120	4.53406383		84.00000000	0.40880952	3.50209589	1.816919
85	0.53938949	8.44824410	4.55689408		85.00000000	0.40400000	3.41309062	1.838389
86	0.54952723	8.30247210	4.56243450		86.00000000	0.39930233	3.31519642	1.859773
87	0.55934203	8.08922000	4.52464074		87.00000000	0.39471264	3.19291741	1.881151
88	0.56946564	7.79596420	4.43953374		88.00000000	0.39022727	3.04219785	1.902634
89	0.57926774	7.40614750	4.29014232		89.00000000	0.38584270	2.85760792	1.924033
90	0.58938986	6.87578630	4.05251872		90.00000000	0.38155556	2.62349446	1.945380
91	0.59917563	6.20461460	3.71765386		91.00000000	0.37736264	2.34138973	1.966766
92	0.60930222	5.31237360	3.23684103		92.00000000	0.37326087	1.98290119	1.988327
93	0.61909020	4.25860500	2.63646062		93.00000000	0.36924731	1.57247845	2.009734
94	0.62923020	2.91691660	1.83541202		94.00000000	0.36531915	1.06560549	2.031092
95	0.63930619	1.35130790	0.86389951		95.00000000	0.36147368	0.48846225	2.052481
96	0.64904577	-0.42447937	-0.27550654		96.00000000	0.35770833	-0.15183981	2.073989
97	0.65914559	-2.51934360	-1.66061422		97.00000000	0.35402062	-0.89189958	2.095379
98	0.66889113	-4.84175730	-3.23860851		98.00000000	0.35040816	-1.69659128	2.116790
99	0.67910856	-7.57164190	-5.14196683		99.00000000	0.34686869	-2.62636548	2.138190
100	0.68720251	-9.99365230	-6.86766294		100.00000000	0.34340000	-3.43182020	2.159691
101	0.68717724	-10.00006200	-6.87181500		101.00000000	0.34000000	-3.40002108	2.181076
13:30 02/04/2018
Test Lot:	JK-PERC
Recipe:	Recipe_YJX-LID
Cell Name:	1-2-40min
Test Order:	3
Test Condition:	Light
1	-0.29988819	8.82100490	-2.64531519		1.00000000	34.34000000	302.91330827	0.000000
2	-0.29005381	8.80878070	-2.55502040		2.00000000	17.17000000	151.24676462	0.061790
3	-0.27994329	8.83699890	-2.47385855		3.00000000	11.44666667	101.15418074	0.083213
4	-0.27009326	8.82417580	-2.38335041		4.00000000	8.58500000	75.75554924	0.104697
5	-0.25993365	8.82921700	-2.29501060		5.00000000	6.86800000	60.63906236	0.126071
6	-0.24978517	8.80686950	-2.19982540		6.00000000	5.72333333	50.40464977	0.147425
7	-0.23996566	8.81331440	-2.11489281		7.00000000	4.90571429	43.23560236	0.168797
8	-0.22981124	8.81683250	-2.02620721		8.00000000	4.29250000	37.84625351	0.190272
9	-0.21995974	8.82817080	-1.94184215		9.00000000	3.81555556	33.68437614	0.211652
10	-0.20983359	8.81659700	-1.85001820		10.00000000	3.43400000	30.27619410	0.232995
11	-0.19999401	8.81244370	-1.76243595		11.00000000	3.12181818	27.51084697	0.254372
12	-0.18985373	8.82336810	-1.67514934		12.00000000	2.86166667	25.24953838	0.275852
13	-0.18006921	8.83182430	-1.59033962		13.00000000	2.64153846	23.32960357	0.297218
14	-0.16990808	8.81982140	-1.49855892		14.00000000	2.45285714	21.63376192	0.318582
15	-0.16010869	8.81575110	-1.41147836		15.00000000	2.28933333	20.18219285	0.339958
16	-0.14995722	8.81099320	-1.32127205		16.00000000	2.14625000	18.91059416	0.361440
17	-0.13980578	8.82793900	-1.23419690		17.00000000	2.02000000	17.83243678	0.382822
18	-0.12999299	8.81054780	-1.14530945		18.00000000	1.90777778	16.80856730	0.404204
19	-0.11986014	8.81547260	-1.05662378		19.00000000	1.80736842	15.93280679	0.425547
20	-0.11002129	8.83078770	-0.97157465		20.00000000	1.71700000	15.16246248	0.447010
21	-0.09984008	8.82271390	-0.88086042		21.00000000	1.63523810	14.42723787	0.468383
22	-0.09003621	8.81049250	-0.79326332		22.00000000	1.56090909	13.75237784	0.489756
23	-0.07989518	8.81387230	-0.70418588		23.00000000	1.49304348	13.15949456	0.511176
24	-0.07006750	8.81264690	-0.61748009		24.00000000	1.43083333	12.60942894	0.532633
25	-0.05995847	8.82008360	-0.52883871		25.00000000	1.37360000	12.11526683	0.554005
26	-0.04979511	8.81528190	-0.43895793		26.00000000	1.32076923	11.64295309	0.575390
27	-0.03996743	8.81982140	-0.35250559		27.00000000	1.27185185	11.21750618	0.596870
28	-0.02979365	8.82907010	-0.26305022		28.00000000	1.22642857	10.82822383	0.618261
29	-0.02003444	8.81620690	-0.17662779		29.00000000	1.18413793	10.43960500	0.639607
30	-0.00986736	8.80916790	-0.08692325		30.00000000	1.14466667	10.08356086	0.660981
31	-0.00062916	8.82133870	-0.00555005		31.00000000	1.10774194	9.77176681	0.682585
32	0.00948412	8.81921390	0.08364250		32.00000000	1.07312500	9.46411892	0.703970
33	0.01930855	8.81716820	0.17024671		33.00000000	1.04060606	9.17519867	0.725320
34	0.02947534	8.83063410	0.26028593		34.00000000	1.01000000	8.91894044	0.746703
35	0.03931465	8.80956460	0.34634495		35.00000000	0.98114286	8.64344138	0.768190
36	0.04944497	8.81944750	0.43607732		36.00000000	0.95388889	8.41277298	0.789562
37	0.05926121	8.81692410	0.52250156		37.00000000	0.92810811	8.18305875	0.810919
38	0.06941460	8.81912230	0.61217586		38.00000000	0.90368421	7.96970157	0.832299
39	0.07954790	8.80720140	0.70059441		39.00000000	0.88051282	7.75485375	0.853783
40	0.08941103	8.82530020	0.78907916		40.00000000	0.85850000	7.57652022	0.875168
41	0.09954805	8.79798410	0.87582215		41.00000000	0.83756098	7.36884815	0.896516
42	0.10932931	8.82372470	0.96469173		42.00000000	0.81761905	7.21444539	0.917890
43	0.11951842	8.81134510	1.05311804		43.00000000	0.79860465	7.03678118	0.939361
44	0.12934582	8.80713650	1.13916629		44.00000000	0.78045455	6.87356971	0.960730
45	0.13950369	8.82971290	1.23177753		45.00000000	0.76311111	6.73805202	0.982084
46	0.14932066	8.81416890	1.31613752		46.00000000	0.74652174	6.57996870	1.003463
47	0.15945174	8.82271190	1.40679676		47.00000000	0.73063830	6.44621121	1.024943
48	0.16960810	8.82781890	1.49726959		48.00000000	0.71541667	6.31556877	1.046324
49	0.17942882	8.80110170	1.57917129		49.00000000	0.70081633	6.16795576	1.067714
50	0.18956435	8.81943800	1.67185103		50.00000000	0.68680000	6.05719002	1.089055
51	0.19935229	8.80763910	1.75582302		51.00000000	0.67333333	5.93047699	1.110523
52	0.20947294	8.80307770	1.84400657		52.00000000	0.66038462	5.81341708	1.131887
53	0.21932863	8.83690070	1.93818532		53.00000000	0.64792453	5.72564472	1.153271
54	0.22944109	8.80920890	2.02119449		54.00000000	0.63592593	5.60200433	1.174663
55	0.23927519	8.81463340	2.10912308		55.00000000	0.62436364	5.50353656	1.196132
56	0.24943453	8.81244850	2.19812895		56.00000000	0.61321429	5.40391931	1.217525
57	0.25957155	8.81417080	2.28790798		57.00000000	0.60245614	5.31015132	1.238905
58	0.26939300	8.81073470	2.37355025		58.00000000	0.59206897	5.21656258	1.260390
59	0.27951366	8.81498530	2.46390880		59.00000000	0.58203390	5.13062026	1.281781
60	0.28937528	8.81045720	2.54952852		60.00000000	0.57233333	5.04251834	1.303131
61	0.29950115	8.80537220	2.63721910		61.00000000	0.56295082	4.95699150	1.324510
62	0.30933374	8.82421590	2.72962771		62.00000000	0.55387097	4.88747700	1.345993
63	0.31947374	8.81972980	2.81767206		63.00000000	0.54507937	4.80745272	1.367370
64	0.32927808	8.81029700	2.90103768		64.00000000	0.53656250	4.72727498	1.388704
65	0.33943221	8.81149860	2.99090644		65.00000000	0.52830769	4.65518249	1.410078
66	0.34926260	8.80814270	3.07635482		66.00000000	0.52030303	4.58290334	1.431549
67	0.35940334	8.81655030	3.16869763		67.00000000	0.51253731	4.51881100	1.452928
68	0.36957610	8.81993680	3.25963784		68.00000000	0.50500000	4.45406808	1.474285
69	0.37938413	8.80605320	3.34087683		69.00000000	0.49768116	4.38260677	1.495657
70	0.38953605	8.80451970	3.42967783		70.00000000	0.49057143	4.31924581	1.517138
71	0.39936939	8.81331160	3.51976688		71.00000000	0.48366197	4.26266367	1.538518
72	0.40951163	8.81262210	3.60887124		72.00000000	0.47694444	4.20313115	1.559860
73	0.41933382	8.79005240	3.68596625		73.00000000	0.47041096	4.13493698	1.581234
74	0.42947382	8.80216980	3.78030149		74.00000000	0.46405405	4.08468258	1.602709
75	0.43930644	8.80080130	3.86624869		75.00000000	0.45786667	4.02959356	1.624087
76	0.44946653	8.79714490	3.95402219		76.00000000	0.45184211	3.97492047	1.645446
77	0.45960355	8.78150940	4.03601289		77.00000000	0.44597403	3.91632510	1.666812
78	0.46944284	8.76425840	4.11431835		78.00000000	0.44025641	3.85852094	1.688274
79	0.47959626	8.76103590	4.20176005		79.00000000	0.43468354	3.80827814	1.709657
80	0.48939982	8.74191380	4.27829104		80.00000000	0.42925000	3.75246650	1.731045
81	0.49954429	8.71969800	4.35587535		81.00000000	0.42395062	3.69672135	1.752401
82	0.50935978	8.68421360	4.42338913		82.00000000	0.41878049	3.63677921	1.773877
83	0.51950127	8.63115880	4.48389796		83.00000000	0.41373494	3.57101197	1.795257
84	0.52928925	8.56132510	4.53141734		84.00000000	0.40880952	3.49995124	1.816644
85	0.53942031	8.44289780	4.55427055		85.00000000	0.40400000	3.41093071	1.837994
86	0.54955137	8.30359460	4.56325179		86.00000000	0.39930233	3.31564463	1.859475
87	0.55937427	8.08185200	4.52078006		87.00000000	0.39471264	3.19000917	1.880855
88	0.56947857	7.79777340	4.44066485		88.00000000	0.39022727	3.04290385	1.902240
89	0.57927394	7.41595650	4.29587034		89.00000000	0.38584270	2.86139265	1.923721
90	0.58939761	6.88688950	4.05911621		90.00000000	0.38155556	2.62773095	1.945116
91	0.59918404	6.20563600	3.71831805		91.00000000	0.37736264	2.34177517	1.966469
92	0.60929281	5.32761620	3.24607825		92.00000000	0.37326087	1.98859066	1.987942
93	0.61909789	4.26863190	2.64270100		93.00000000	0.36924731	1.57618085	2.009490
94	0.62920439	2.93029070	1.84375177		94.00000000	0.36531915	1.07049130	2.030883
95	0.63934064	1.35274520	0.86486498		95.00000000	0.36147368	0.48898179	2.052227
96	0.64906311	-0.42543909	-0.27613682		96.00000000	0.35770833	-0.15218311	2.073617
97	0.65912867	-2.54030280	-1.67438641		97.00000000	0.35402062	-0.89931957	2.095097
98	0.66888237	-4.86854790	-3.25648586		98.00000000	0.35040816	-1.70597893	2.116521
99	0.67911321	-7.62893150	-5.18090816		99.00000000	0.34686869	-2.64623745	2.137865
100	0.68694371	-9.99395370	-6.86528363		100.00000000	0.34340000	-3.43192370	2.159228
101	0.68693030	-10.00015400	-6.86940879		101.00000000	0.34000000	-3.40005236	2.180694
13:30 02/04/2018
Test Lot:	JK-PERC
Recipe:	Recipe_YJX-LID
Cell Name:	1-2-40min
Test Order:	4
Test Condition:	Light
1	-0.29991332	8.82700350	-2.64733593		1.00000000	34.34000000	303.11930019	0.000000
2	-0.29011077	8.81133940	-2.55626446		2.00000000	17.17000000	151.29069750	0.061728
3	-0.27994874	8.81442550	-2.46758731		3.00000000	11.44666667	100.89579056	0.083264
4	-0.27012089	8.82070160	-2.38265577		4.00000000	8.58500000	75.72572324	0.104710
5	-0.25995585	8.81192870	-2.29071242		5.00000000	6.86800000	60.52032631	0.126066
6	-0.24980797	8.82147410	-2.20367454		6.00000000	5.72333333	50.48823677	0.147450
7	-0.23997715	8.81009100	-2.11422053		7.00000000	4.90571429	43.21978928	0.168936
8	-0.22982031	8.82640930	-2.02848812		8.00000000	4.29250000	37.88736192	0.190305
9	-0.22001480	8.81685350	-1.93983826		9.00000000	3.81555556	33.64119435	0.211654
10	-0.20987658	8.81788160	-1.85066683		10.00000000	3.43400000	30.28060541	0.233026
11	-0.20007032	8.80539700	-1.76169860		11.00000000	3.12181818	27.48884845	0.254505
12	-0.18992986	8.82103060	-1.67537711		12.00000000	2.86166667	25.24284923	0.275887
13	-0.18016379	8.82174780	-1.58935952		13.00000000	2.64153846	23.30298611	0.297238
14	-0.17001738	8.82103060	-1.49972851		14.00000000	2.45285714	21.63672791	0.318619
15	-0.16019252	8.82363700	-1.41348065		15.00000000	2.28933333	20.20024631	0.340104
16	-0.15006769	8.81623080	-1.32303139		16.00000000	2.14625000	18.92183535	0.361486
17	-0.13990788	8.80801490	-1.23231069		17.00000000	2.02000000	17.79219010	0.382836
18	-0.13008152	8.82694340	-1.14822221		18.00000000	1.90777778	16.83984646	0.404209
19	-0.11992469	8.81099890	-1.05665631		19.00000000	1.80736842	15.92472117	0.425687
20	-0.11011694	8.82724380	-0.97202908		20.00000000	1.71700000	15.15637760	0.447074
21	-0.09995639	8.80464270	-0.88008033		21.00000000	1.63523810	14.39768716	0.468457
22	-0.09011515	8.82189850	-0.79498672		22.00000000	1.56090909	13.77018157	0.489800
23	-0.07999033	8.81181530	-0.70485999		23.00000000	1.49304348	13.15642337	0.511258
24	-0.07014313	8.81681820	-0.61843925		24.00000000	1.43083333	12.61539737	0.532629
25	-0.06000863	8.82425980	-0.52953174		25.00000000	1.37360000	12.12100326	0.554008
26	-0.04984808	8.81013970	-0.43916855		26.00000000	1.32076923	11.63616143	0.575419
27	-0.04005075	8.82423780	-0.35341733		27.00000000	1.27185185	11.22312319	0.596889
28	-0.02986043	8.80844210	-0.26302383		28.00000000	1.22642857	10.80292506	0.618263
29	-0.02003705	8.81794170	-0.17668550		29.00000000	1.18413793	10.44165924	0.639644
30	-0.00992785	8.81394290	-0.08750351		30.00000000	1.14466667	10.08902664	0.661116
31	-0.00069694	8.81484220	-0.00614342		31.00000000	1.10774194	9.76457036	0.682634
32	0.00943587	8.83675770	0.08338245		32.00000000	1.07312500	9.48294561	0.704003
33	0.01927980	8.80668350	0.16979113		33.00000000	1.04060606	9.16428822	0.725379
34	0.02942890	8.82238580	0.25963314		34.00000000	1.01000000	8.91060966	0.746864
35	0.03925945	8.82625390	0.34651383		35.00000000	0.98114286	8.65981597	0.768244
36	0.04941301	8.81938360	0.43579226		36.00000000	0.95388889	8.41271202	0.789601
37	0.05923090	8.81336400	0.52202346		37.00000000	0.92810811	8.17975459	0.810988
38	0.06937032	8.81701370	0.61163908		38.00000000	0.90368421	7.96779606	0.832460
39	0.07951123	8.81490900	0.70088428		39.00000000	0.88051282	7.76164039	0.853835
40	0.08931275	8.81745910	0.78751149		40.00000000	0.85850000	7.56978864	0.875189
41	0.09945515	8.80129150	0.87533375		41.00000000	0.83756098	7.37161830	0.896567
42	0.10929462	8.81505970	0.96343860		42.00000000	0.81761905	7.20736072	0.918047
43	0.11944818	8.81111240	1.05247134		43.00000000	0.79860465	7.03659534	0.939432
44	0.12928841	8.81914330	1.14021301		44.00000000	0.78045455	6.88294048	0.960775
45	0.13938764	8.81616590	1.22886456		45.00000000	0.76311111	6.72771416	0.982151
46	0.14923902	8.81492230	1.31553037		46.00000000	0.74652174	6.58053113	1.003622
47	0.15937844	8.81718060	1.40526849		47.00000000	0.73063830	6.44216983	1.025002
48	0.16950223	8.81611060	1.49435041		48.00000000	0.71541667	6.30719246	1.046363
49	0.17933276	8.82098200	1.58189105		49.00000000	0.70081633	6.18188820	1.067733
50	0.18947591	8.81027320	1.66933453		50.00000000	0.68680000	6.05089563	1.089213
51	0.19925807	8.82251740	1.75795779		51.00000000	0.67333333	5.94049505	1.110612
52	0.20942503	8.81242560	1.84554250		52.00000000	0.66038462	5.81959029	1.131991
53	0.21920794	8.82143590	1.93372879		53.00000000	0.64792453	5.71562469	1.153331
54	0.22937267	8.82085510	2.02326309		54.00000000	0.63592593	5.60941045	1.174815
55	0.23922183	8.80118470	2.10543551		55.00000000	0.62436364	5.49513968	1.196198
56	0.24935901	8.82397750	2.20033829		56.00000000	0.61321429	5.41098906	1.217591
57	0.25951332	8.80002500	2.28372370		57.00000000	0.60245614	5.30162910	1.238977
58	0.26933122	8.81674000	2.37462334		58.00000000	0.59206897	5.22011813	1.260451
59	0.27947137	8.80924700	2.46193233		59.00000000	0.58203390	5.12728037	1.281833
60	0.28930044	8.81915470	2.55138534		60.00000000	0.57233333	5.04749621	1.303220
61	0.29943836	8.80715560	2.63720023		61.00000000	0.56295082	4.95799546	1.324699
62	0.30926445	8.81195550	2.72522457		62.00000000	0.55387097	4.88068632	1.346091
63	0.31941056	8.80784800	2.81331966		63.00000000	0.54507937	4.80097620	1.367439
64	0.32926491	8.80837250	2.90028798		64.00000000	0.53656250	4.72624237	1.388819
65	0.33941698	8.80771450	2.98948786		65.00000000	0.52830769	4.65318332	1.410292
66	0.34919691	8.81151770	3.07695475		66.00000000	0.52030303	4.58465936	1.431675
67	0.35937282	8.80943200	3.16587042		67.00000000	0.51253731	4.51516261	1.453015
68	0.36950108	8.80836200	3.25469927		68.00000000	0.50500000	4.44822281	1.474405
69	0.37932193	8.80567740	3.34018655		69.00000000	0.49768116	4.38241974	1.495885
70	0.38948295	8.80952360	3.43115924		70.00000000	0.49057143	4.32170058	1.517277
71	0.39931720	8.80029870	3.51411064		71.00000000	0.48366197	4.25636982	1.538631
72	0.40946853	8.80385490	3.60490152		72.00000000	0.47694444	4.19894968	1.560003
73	0.41927749	8.80500980	3.69174241		73.00000000	0.47041096	4.14197310	1.581479
74	0.42942363	8.80165200	3.77963735		74.00000000	0.46405405	4.08444229	1.602851
75	0.43924448	8.79641820	3.86377814		75.00000000	0.45786667	4.02758668	1.624195
76	0.44940624	8.78691580	3.94889479		76.00000000	0.45184211	3.97029853	1.645581
77	0.45954120	8.78212170	4.03574674		77.00000000	0.44597403	3.91659817	1.667056
78	0.46938291	8.76760100	4.11536207		78.00000000	0.44025641	3.85999254	1.688445
79	0.47951934	8.76070500	4.20092748		79.00000000	0.43468354	3.80813430	1.709799
80	0.48932904	8.75209430	4.28265390		80.00000000	0.42925000	3.75683648	1.731175
81	0.49944690	8.71259780	4.35147996		81.00000000	0.42395062	3.69371122	1.752655
82	0.50926852	8.68830780	4.42468165		82.00000000	0.41878049	3.63849378	1.774039
83	0.51939678	8.62941070	4.48208813		83.00000000	0.41373494	3.57028872	1.795453
84	0.52920574	8.55984500	4.52991911		84.00000000	0.40880952	3.49934616	1.816812
85	0.53931612	8.45118050	4.55785788		85.00000000	0.40400000	3.41427692	1.838282
86	0.54946816	8.30385210	4.56270233		86.00000000	0.39930233	3.31574745	1.859665
87	0.55930841	8.08802410	4.52369990		87.00000000	0.39471264	3.19244537	1.881057
88	0.56939942	7.80437280	4.44380535		88.00000000	0.39022727	3.04547911	1.902398
89	0.57921880	7.41286470	4.29367060		89.00000000	0.38584270	2.86019971	1.923869
90	0.58933443	6.88260130	4.05615391		90.00000000	0.38155556	2.62609476	1.945252
91	0.59912103	6.21620080	3.72425663		91.00000000	0.37736264	2.34576193	1.966639
92	0.60922325	5.34092000	3.25381264		92.00000000	0.37326087	1.99355644	1.988189
93	0.61902851	4.27723260	2.64772892		93.00000000	0.36924731	1.57935664	2.009592
94	0.62917018	2.94161220	1.85077468		94.00000000	0.36531915	1.07462727	2.030941
95	0.63927680	1.35300870	0.86494707		95.00000000	0.36147368	0.48907704	2.052317
96	0.64896965	-0.42806938	-0.27780404		96.00000000	0.35770833	-0.15312398	2.073807
97	0.65909421	-2.56048150	-1.68759853		97.00000000	0.35402062	-0.90646324	2.095232
98	0.66884959	-4.89702750	-3.27537484		98.00000000	0.35040816	-1.71595841	2.116596
99	0.67909020	-7.67956070	-5.21511441		99.00000000	0.34686869	-2.66379914	2.137978
100	0.68668419	-9.99440290	-6.86299846		100.00000000	0.34340000	-3.43207796	2.159470
101	0.68667006	-10.00008900	-6.86676171		101.00000000	0.34000000	-3.40003026	2.180862
