# Supplementary material for: Study on the Electrical Injection Regeneration of Industrialized B-Doped Czochralski Silicon PERC Solar Cells
Source: Hindawi journal article supplement (doi:10.1155/2019/5357370), 2019-06-20
Supplement: f1 [file 5357370.f1.zip › section3.2/IVRawData_1-2-50min.csv]

13:53 02/04/2018
Test Lot:	JK-PERC
Recipe:	Recipe_YJX-LID
Cell Name:	1-2-50min
Test Order:	2
Test Condition:	Light
1	-0.29990503	8.81425760	-2.64344019		1.00000000	34.34000000	302.68160598	0.000000
2	-0.29013112	8.80981350	-2.55600106		2.00000000	17.17000000	151.26449780	0.061799
3	-0.27998728	8.81459140	-2.46797347		3.00000000	11.44666667	100.89768956	0.083199
4	-0.27014861	8.80773450	-2.37939723		4.00000000	8.58500000	75.61440068	0.104714
5	-0.26001447	8.80226900	-2.28871731		5.00000000	6.86800000	60.45398349	0.126115
6	-0.24983789	8.81518080	-2.20236617		6.00000000	5.72333333	50.45221811	0.147493
7	-0.24000965	8.81505200	-2.11569755		7.00000000	4.90571429	43.24412653	0.168844
8	-0.22986954	8.80747220	-2.02456958		8.00000000	4.29250000	37.80607442	0.190325
9	-0.22007479	8.81753250	-1.94051661		9.00000000	3.81555556	33.64378512	0.211695
10	-0.20991087	8.79495910	-1.84615752		10.00000000	3.43400000	30.20188955	0.233075
11	-0.20010644	8.82142540	-1.76522403		11.00000000	3.12181818	27.53888620	0.254430
12	-0.18996932	8.79884910	-1.67151138		12.00000000	2.86166667	25.17937317	0.275909
13	-0.18014851	8.82244680	-1.58935065		13.00000000	2.64153846	23.30483255	0.297292
14	-0.16999799	8.79479030	-1.49509667		14.00000000	2.45285714	21.57236421	0.318684
15	-0.16016230	8.81796460	-1.41230549		15.00000000	2.28933333	20.18726029	0.340155
16	-0.15001327	8.79446030	-1.31928575		16.00000000	2.14625000	18.87511042	0.361527
17	-0.13987838	8.81077860	-1.23243744		17.00000000	2.02000000	17.79777277	0.382890
18	-0.13006203	8.81527230	-1.14653221		18.00000000	1.90777778	16.81758060	0.404253
19	-0.11989217	8.81968980	-1.05741175		19.00000000	1.80736842	15.94042883	0.425792
20	-0.11010113	8.80091670	-0.96899087		20.00000000	1.71700000	15.11117397	0.447173
21	-0.09994242	8.81950470	-0.88144261		21.00000000	1.63523810	14.42199007	0.468517
22	-0.09011342	8.79590510	-0.79262913		22.00000000	1.56090909	13.72960823	0.489889
23	-0.07995769	8.81502530	-0.70482910		23.00000000	1.49304348	13.16121603	0.511363
24	-0.07013094	8.80898280	-0.61778222		24.00000000	1.43083333	12.60418622	0.532740
25	-0.06000125	8.79866890	-0.52793117		25.00000000	1.37360000	12.08585160	0.554099
26	-0.04980980	8.81461520	-0.43905418		26.00000000	1.32076923	11.64207254	0.575474
27	-0.04002546	8.80993750	-0.35262181		27.00000000	1.27185185	11.20493532	0.596959
28	-0.02985187	8.81389430	-0.26311120		28.00000000	1.22642857	10.80961180	0.618345
29	-0.02003404	8.79192350	-0.17613773		29.00000000	1.18413793	10.41085010	0.639704
30	-0.00994231	8.81007580	-0.08759255		30.00000000	1.14466667	10.08460010	0.661073
31	-0.00068270	8.81205840	-0.00601598		31.00000000	1.10774194	9.76148663	0.682668
32	0.00948101	8.80254270	0.08345702		32.00000000	1.07312500	9.44622863	0.704034
33	0.01930303	8.81345650	0.17012640		33.00000000	1.04060606	9.17133625	0.725374
34	0.02943465	8.81449790	0.25945169		34.00000000	1.01000000	8.90264288	0.746760
35	0.03926039	8.80811790	0.34581012		35.00000000	0.98114286	8.64202196	0.768239
36	0.04937043	8.80943970	0.43492583		36.00000000	0.95388889	8.40322665	0.789661
37	0.05921626	8.81050780	0.52172533		37.00000000	0.92810811	8.17710373	0.811034
38	0.06938138	8.81546780	0.61162931		38.00000000	0.90368421	7.96639906	0.832400
39	0.07949439	8.79658320	0.69927905		39.00000000	0.88051282	7.74550428	0.853902
40	0.08936628	8.82391930	0.78856084		40.00000000	0.85850000	7.57533472	0.875285
41	0.09947334	8.80464840	0.87582780		41.00000000	0.83756098	7.37442990	0.896673
42	0.10931843	8.80622200	0.96268236		42.00000000	0.81761905	7.20013484	0.918035
43	0.11944112	8.80915450	1.05217528		43.00000000	0.79860465	7.03503176	0.939522
44	0.12931077	8.80583860	1.13868977		44.00000000	0.78045455	6.87255676	0.960904
45	0.13944685	8.81217480	1.22883002		45.00000000	0.76311111	6.72466850	0.982298
46	0.14926814	8.80581190	1.31442716		46.00000000	0.74652174	6.57373001	1.003789
47	0.15941687	8.81676960	1.40554181		47.00000000	0.73063830	6.44186953	1.025161
48	0.16957305	8.81450650	1.49470275		48.00000000	0.71541667	6.30604486	1.046528
49	0.17935786	8.81018730	1.58017634		49.00000000	0.70081633	6.17432310	1.067899
50	0.18951628	8.81048110	1.66972960		50.00000000	0.68680000	6.05103842	1.089371
51	0.19931597	8.81224540	1.75642124		51.00000000	0.67333333	5.93357857	1.110749
52	0.20944908	8.79719540	1.84256448		52.00000000	0.66038462	5.80953250	1.132102
53	0.21926291	8.82505040	1.93500623		53.00000000	0.64792453	5.71796662	1.153479
54	0.22940794	8.80943010	2.02095321		54.00000000	0.63592593	5.60214499	1.174958
55	0.23923293	8.81124880	2.10794087		55.00000000	0.62436364	5.50142334	1.196338
56	0.24940994	8.80205150	2.19531914		56.00000000	0.61321429	5.39754372	1.217698
57	0.25955722	8.81291770	2.28745642		57.00000000	0.60245614	5.30939638	1.239074
58	0.26935464	8.79338840	2.36853997		58.00000000	0.59206897	5.20629237	1.260554
59	0.27951828	8.80341530	2.46071550		59.00000000	0.58203390	5.12388613	1.281942
60	0.28933138	8.80578520	2.54778998		60.00000000	0.57233333	5.03984440	1.303293
61	0.29949573	8.80730720	2.63775090		61.00000000	0.56295082	4.95808081	1.324672
62	0.30929914	8.80499360	2.72337695		62.00000000	0.55387097	4.87683033	1.346161
63	0.31942406	8.80817320	2.81354244		63.00000000	0.54507937	4.80115346	1.367548
64	0.32924089	8.81252570	2.90144380		64.00000000	0.53656250	4.72847082	1.388904
65	0.33939707	8.80357740	2.98790838		65.00000000	0.52830769	4.65099766	1.410273
66	0.34921908	8.80166150	3.07370813		66.00000000	0.52030303	4.57953115	1.431749
67	0.35935965	8.79616930	3.16098832		67.00000000	0.51253731	4.50836498	1.453143
68	0.36953145	8.80213830	3.25266693		68.00000000	0.50500000	4.44507984	1.474505
69	0.37936240	8.79597850	3.33686351		69.00000000	0.49768116	4.37759278	1.495872
70	0.38948658	8.79898740	3.42708751		70.00000000	0.49057143	4.31653182	1.517349
71	0.39931157	8.79528620	3.51205954		71.00000000	0.48366197	4.25394547	1.538786
72	0.40945658	8.79101370	3.59953840		72.00000000	0.47694444	4.19282515	1.560178
73	0.41928157	8.79679490	3.68833398		73.00000000	0.47041096	4.13810872	1.581532
74	0.42942140	8.78890130	3.77414230		74.00000000	0.46405405	4.07852528	1.603000
75	0.43924117	8.78788660	3.86000159		75.00000000	0.45786667	4.02368034	1.624378
76	0.44939217	8.77399160	3.94296312		76.00000000	0.45184211	3.96445884	1.645763
77	0.45953643	8.76560210	4.02811350		77.00000000	0.44597403	3.90923086	1.667250
78	0.46939269	8.76656340	4.11496078		78.00000000	0.44025641	3.85953573	1.688638
79	0.47954440	8.73822400	4.19036639		79.00000000	0.43468354	3.79836218	1.709990
80	0.48936418	8.72421360	4.26931763		80.00000000	0.42925000	3.74486869	1.731360
81	0.49947944	8.70031360	4.34562776		81.00000000	0.42395062	3.68850332	1.752844
82	0.50930220	8.67912580	4.42029786		82.00000000	0.41878049	3.63464854	1.774228
83	0.51945692	8.61175630	4.47343640		83.00000000	0.41373494	3.56298447	1.795585
84	0.52922684	8.54039380	4.51980562		84.00000000	0.40880952	3.49139432	1.816968
85	0.53936809	8.43768980	4.55102063		85.00000000	0.40400000	3.40882668	1.838460
86	0.54950196	8.27728560	4.54838466		86.00000000	0.39930233	3.30513939	1.859837
87	0.55931580	8.07995610	4.51924711		87.00000000	0.39471264	3.18926083	1.881207
88	0.56944817	7.78076220	4.43074080		88.00000000	0.39022727	3.03626561	1.902586
89	0.57924712	7.39342210	4.28261846		89.00000000	0.38584270	2.85269792	1.924062
90	0.58936983	6.85666850	4.04111355		90.00000000	0.38155556	2.61619996	1.945451
91	0.59915310	6.19047160	3.70904025		91.00000000	0.37736264	2.33605269	1.966790
92	0.60929739	5.30933860	3.23496615		92.00000000	0.37326087	1.98176834	1.988284
93	0.61907250	4.23916770	2.62435215		93.00000000	0.36924731	1.56530128	2.009797
94	0.62917513	2.90432830	1.82733114		94.00000000	0.36531915	1.06100674	2.031175
95	0.63926136	1.31709590	0.84196852		95.00000000	0.36147368	0.47609551	2.052589
96	0.64902306	-0.45701909	-0.29661593		96.00000000	0.35770833	-0.16347954	2.073978
97	0.65911746	-2.57088140	-1.69451282		97.00000000	0.35402062	-0.91014502	2.095465
98	0.66888666	-4.90269950	-3.27935029		98.00000000	0.35040816	-1.71794593	2.116850
99	0.67908227	-7.64772700	-5.19343581		99.00000000	0.34686869	-2.65275702	2.138215
100	0.68687022	-9.99374960	-6.86440899		100.00000000	0.34340000	-3.43185361	2.159582
101	0.68689924	-10.00000200	-6.86899377		101.00000000	0.34000000	-3.40000068	2.181048
13:53 02/04/2018
Test Lot:	JK-PERC
Recipe:	Recipe_YJX-LID
Cell Name:	1-2-50min
Test Order:	3
Test Condition:	Light
1	-0.29991886	8.80977820	-2.64221863		1.00000000	34.34000000	302.52778339	0.000000
2	-0.29015297	8.81453420	-2.55756328		2.00000000	17.17000000	151.34555221	0.061765
3	-0.28000078	8.80516050	-2.46545181		3.00000000	11.44666667	100.78973719	0.083286
4	-0.27014628	8.79757400	-2.37663189		4.00000000	8.58500000	75.52717279	0.104763
5	-0.25996655	8.82763000	-2.29488852		5.00000000	6.86800000	60.62816284	0.126150
6	-0.24988802	8.80754570	-2.20090016		6.00000000	5.72333333	50.40851989	0.147535
7	-0.24005215	8.80542090	-2.11376022		7.00000000	4.90571429	43.19687910	0.169029
8	-0.22989623	8.80419250	-2.02405066		8.00000000	4.29250000	37.79199631	0.190438
9	-0.22007078	8.80607030	-1.93795876		9.00000000	3.81555556	33.60005046	0.211781
10	-0.20992750	8.80629060	-1.84868257		10.00000000	3.43400000	30.24080192	0.233150
11	-0.20011099	8.80362700	-1.76170251		11.00000000	3.12181818	27.48332283	0.254643
12	-0.18996176	8.80660920	-1.67291898		12.00000000	2.86166667	25.20157999	0.276014
13	-0.18018989	8.80684470	-1.58690438		13.00000000	2.64153846	23.26361900	0.297353
14	-0.17002131	8.80794430	-1.49753823		14.00000000	2.45285714	21.60462909	0.318733
15	-0.16022043	8.81185440	-1.41183910		15.00000000	2.28933333	20.17327201	0.340256
16	-0.15003920	8.80268760	-1.32074821		16.00000000	2.14625000	18.89276826	0.361632
17	-0.13989964	8.81877710	-1.23374374		17.00000000	2.02000000	17.81392974	0.382986
18	-0.13010471	8.79278760	-1.14398308		18.00000000	1.90777778	16.77468479	0.404364
19	-0.11994432	8.82881360	-1.05896604		19.00000000	1.80736842	15.95691890	0.425829
20	-0.11011887	8.79569820	-0.96857235		20.00000000	1.71700000	15.10221381	0.447211
21	-0.09996518	8.81699940	-0.88139291		21.00000000	1.63523810	14.41789330	0.468553
22	-0.09013153	8.80445480	-0.79355897		22.00000000	1.56090909	13.74295354	0.489918
23	-0.07997412	8.80495360	-0.70416843		23.00000000	1.49304348	13.14617855	0.511404
24	-0.07017992	8.80991650	-0.61827927		24.00000000	1.43083333	12.60552219	0.532769
25	-0.06001656	8.80914210	-0.52869441		25.00000000	1.37360000	12.10023759	0.554135
26	-0.04983533	8.81220820	-0.43915932		26.00000000	1.32076923	11.63889345	0.575510
27	-0.04002402	8.81315610	-0.35273794		27.00000000	1.27185185	11.20902891	0.596983
28	-0.02986735	8.81369500	-0.26324174		28.00000000	1.22642857	10.80936737	0.618379
29	-0.02009251	8.81287380	-0.17707275		29.00000000	1.18413793	10.43565815	0.639730
30	-0.00993138	8.81008530	-0.08749629		30.00000000	1.14466667	10.08461097	0.661146
31	-0.00068945	8.81459430	-0.00607723		31.00000000	1.10774194	9.76429575	0.682760
32	0.00946701	8.79614540	0.08327318		32.00000000	1.07312500	9.43936353	0.704133
33	0.01930484	8.81018730	0.17007922		33.00000000	1.04060606	9.16793430	0.725526
34	0.02943070	8.80577660	0.25916016		34.00000000	1.01000000	8.89383437	0.746875
35	0.03930425	8.79353240	0.34562319		35.00000000	0.98114286	8.62771150	0.768353
36	0.04941820	8.80245690	0.43500161		36.00000000	0.95388889	8.39656583	0.789745
37	0.05923891	8.81435590	0.52215287		37.00000000	0.92810811	8.18067518	0.811132
38	0.06938636	8.81041430	0.61132254		38.00000000	0.90368421	7.96183229	0.832542
39	0.07947277	8.79583170	0.69902914		39.00000000	0.88051282	7.74484258	0.854013
40	0.08929274	8.81077960	0.78673867		40.00000000	0.85850000	7.56405429	0.875379
41	0.09944838	8.79191020	0.87434118		41.00000000	0.83756098	7.36376088	0.896770
42	0.10927355	8.81274700	0.96300015		42.00000000	0.81761905	7.20546981	0.918121
43	0.11944183	8.81298070	1.05263854		43.00000000	0.79860465	7.03808738	0.939613
44	0.12929305	8.80041120	1.13783201		44.00000000	0.78045455	6.86832092	0.960998
45	0.13942786	8.80447770	1.22758948		45.00000000	0.76311111	6.71879476	0.982378
46	0.14922400	8.79916570	1.31304670		46.00000000	0.74652174	6.56876848	1.003743
47	0.15938261	8.81299780	1.40463859		47.00000000	0.73063830	6.43911371	1.025273
48	0.16953824	8.81312470	1.49416165		48.00000000	0.71541667	6.30505630	1.046654
49	0.17932025	8.80597690	1.57908998		49.00000000	0.70081633	6.17137238	1.068042
50	0.18949300	8.80655570	1.66878066		50.00000000	0.68680000	6.04834245	1.089398
51	0.19930254	8.81549740	1.75695102		51.00000000	0.67333333	5.93576825	1.110880
52	0.20942989	8.79654790	1.84226006		52.00000000	0.66038462	5.80910490	1.132259
53	0.21924464	8.81132030	1.93183475		53.00000000	0.64792453	5.70907055	1.153650
54	0.22938392	8.80250360	2.01915278		54.00000000	0.63592593	5.59774025	1.175144
55	0.23924853	8.81268880	2.10842284		55.00000000	0.62436364	5.50232243	1.196538
56	0.24939077	8.79840180	2.19424020		56.00000000	0.61321429	5.39530568	1.217906
57	0.25952780	8.79982380	2.28379891		57.00000000	0.60245614	5.30150788	1.239285
58	0.26934254	8.81535050	2.37434889		58.00000000	0.59206897	5.21929545	1.260758
59	0.27948925	8.79746060	2.45879566		59.00000000	0.58203390	5.12042029	1.282144
60	0.28931144	8.80347540	2.54694614		60.00000000	0.57233333	5.03852242	1.303498
61	0.29946560	8.81194970	2.63887580		61.00000000	0.56295082	4.96069431	1.324873
62	0.30928108	8.79799270	2.72105268		62.00000000	0.55387097	4.87295273	1.346362
63	0.31944343	8.79539110	2.80962990		63.00000000	0.54507937	4.79418620	1.367742
64	0.32923809	8.80476470	2.89886391		64.00000000	0.53656250	4.72430656	1.389102
65	0.33939520	8.80038260	2.98680761		65.00000000	0.52830769	4.64930982	1.410484
66	0.34923005	8.81027410	3.07681246		66.00000000	0.52030303	4.58401231	1.431950
67	0.35938197	8.79706670	3.16150716		67.00000000	0.51253731	4.50882493	1.453343
68	0.36951676	8.80042270	3.25190368		68.00000000	0.50500000	4.44421346	1.474689
69	0.37932408	8.80313780	3.33924215		69.00000000	0.49768116	4.38115583	1.496065
70	0.38947225	8.80329800	3.42864028		70.00000000	0.49057143	4.31864648	1.517564
71	0.39932200	8.79753590	3.51304963		71.00000000	0.48366197	4.25503356	1.538931
72	0.40943670	8.77890110	3.59440430		72.00000000	0.47694444	4.18704811	1.560294
73	0.41927674	8.79741860	3.68855299		73.00000000	0.47041096	4.13840212	1.581674
74	0.42942941	8.79050160	3.77489992		74.00000000	0.46405405	4.07926790	1.603156
75	0.43926650	8.78059670	3.85702198		75.00000000	0.45786667	4.02034254	1.624538
76	0.44939086	8.77370640	3.94282346		76.00000000	0.45184211	3.96432997	1.645905
77	0.45954800	8.77919960	4.03446362		77.00000000	0.44597403	3.91529499	1.667266
78	0.46939772	8.74628160	4.10548464		78.00000000	0.44025641	3.85060654	1.688743
79	0.47955263	8.75220780	4.19714427		79.00000000	0.43468354	3.80444071	1.710113
80	0.48937482	8.72475530	4.26967555		80.00000000	0.42925000	3.74510121	1.731489
81	0.49948281	8.69697760	4.34399081		81.00000000	0.42395062	3.68708902	1.752849
82	0.50928789	8.67795090	4.41957530		82.00000000	0.41878049	3.63415651	1.774332
83	0.51945990	8.60357000	4.46920961		83.00000000	0.41373494	3.55959752	1.795701
84	0.52922553	8.54249000	4.52090380		84.00000000	0.40880952	3.49225127	1.817094
85	0.53934765	8.42761330	4.54541343		85.00000000	0.40400000	3.40475577	1.838571
86	0.54950702	8.27913570	4.54944319		86.00000000	0.39930233	3.30587814	1.859952
87	0.55930841	8.05904770	4.50749316		87.00000000	0.39471264	3.18100802	1.881319
88	0.56941193	7.76720670	4.42274016		88.00000000	0.39022727	3.03097589	1.902693
89	0.57924902	7.39669850	4.28453036		89.00000000	0.38584270	2.85396210	1.924165
90	0.58935106	6.85275080	4.03867595		90.00000000	0.38155556	2.61470514	1.945559
91	0.59917772	6.18155770	3.70385165		91.00000000	0.37736264	2.33268892	1.966904
92	0.60927308	5.29938080	3.22877006		92.00000000	0.37326087	1.97805149	1.988380
93	0.61909151	4.22969100	2.61856579		93.00000000	0.36924731	1.56180203	2.009882
94	0.62917572	2.89420180	1.82096150		94.00000000	0.36531915	1.05730734	2.031266
95	0.63929337	1.31404480	0.84006013		95.00000000	0.36147368	0.47499262	2.052644
96	0.64901662	-0.45700166	-0.29660167		96.00000000	0.35770833	-0.16347330	2.074018
97	0.65911192	-2.56486270	-1.69053158		97.00000000	0.35402062	-0.90801428	2.095503
98	0.66887683	-4.89443640	-3.27377510		98.00000000	0.35040816	-1.71505047	2.116937
99	0.67908603	-7.62888050	-5.18066617		99.00000000	0.34686869	-2.64621976	2.138307
100	0.68697834	-9.99379350	-6.86551967		100.00000000	0.34340000	-3.43186869	2.159698
101	0.68695378	-10.00014500	-6.86963741		101.00000000	0.34000000	-3.40004930	2.181186
13:54 02/04/2018
Test Lot:	JK-PERC
Recipe:	Recipe_YJX-LID
Cell Name:	1-2-50min
Test Order:	4
Test Condition:	Light
1	-0.29994202	8.80438610	-2.64080535		1.00000000	34.34000000	302.34261867	0.000000
2	-0.29008755	8.80968860	-2.55558098		2.00000000	17.17000000	151.26235326	0.061734
3	-0.27993163	8.80075360	-2.46360930		3.00000000	11.44666667	100.73929287	0.083255
4	-0.27016720	8.80961990	-2.38007034		4.00000000	8.58500000	75.63058684	0.104636
5	-0.25996065	8.81530570	-2.29163260		5.00000000	6.86800000	60.54351955	0.126045
6	-0.24982335	8.80742550	-2.20030054		6.00000000	5.72333333	50.40783195	0.147445
7	-0.24003361	8.79648780	-2.11145272		7.00000000	4.90571429	43.15305586	0.168946
8	-0.22986279	8.80789090	-2.02460638		8.00000000	4.29250000	37.80787169	0.190327
9	-0.22001798	8.79607390	-1.93529441		9.00000000	3.81555556	33.56190864	0.211737
10	-0.20987546	8.81507210	-1.85006731		10.00000000	3.43400000	30.27095759	0.233110
11	-0.20005596	8.80064680	-1.76062184		11.00000000	3.12181818	27.47401919	0.254583
12	-0.18989110	8.80634210	-1.67224599		12.00000000	2.86166667	25.20081564	0.275966
13	-0.18015347	8.81320290	-1.58772908		13.00000000	2.64153846	23.28041443	0.297303
14	-0.17001094	8.80143450	-1.49634015		14.00000000	2.45285714	21.58866148	0.318680
15	-0.16015348	8.81237510	-1.41133254		15.00000000	2.28933333	20.17446406	0.340173
16	-0.15003403	8.80452160	-1.32097786		16.00000000	2.14625000	18.89670448	0.361548
17	-0.13988703	8.80518050	-1.23173055		17.00000000	2.02000000	17.78646461	0.382966
18	-0.13006306	8.81715110	-1.14678565		18.00000000	1.90777778	16.82116493	0.404335
19	-0.11992276	8.80879690	-1.05637524		19.00000000	1.80736842	15.92074134	0.425844
20	-0.11010550	8.81020930	-0.97005250		20.00000000	1.71700000	15.12712937	0.447256
21	-0.09993841	8.80576520	-0.88003416		21.00000000	1.63523810	14.39952271	0.468642
22	-0.09011444	8.81738000	-0.79457323		22.00000000	1.56090909	13.76312860	0.489989
23	-0.07995553	8.79319670	-0.70306473		23.00000000	1.49304348	13.12862499	0.511470
24	-0.07014348	8.80625920	-0.61770163		24.00000000	1.43083333	12.60028921	0.532858
25	-0.05999053	8.80473330	-0.52820061		25.00000000	1.37360000	12.09418166	0.554242
26	-0.04987852	8.80675130	-0.43926768		26.00000000	1.32076923	11.63168614	0.575737
27	-0.04002031	8.81162260	-0.35264386		27.00000000	1.27185185	11.20707852	0.597121
28	-0.02986960	8.80034640	-0.26286279		28.00000000	1.22642857	10.79299626	0.618484
29	-0.02006572	8.81836130	-0.17694678		29.00000000	1.18413793	10.44215610	0.639874
30	-0.00989789	8.79594230	-0.08706125		30.00000000	1.14466667	10.06842195	0.661365
31	-0.00064852	8.81903740	-0.00571928		31.00000000	1.10774194	9.76921756	0.682854
32	0.00949827	8.80593490	0.08364115		32.00000000	1.07312500	9.44986889	0.704221
33	0.01928326	8.80554960	0.16979968		33.00000000	1.04060606	9.16310828	0.725606
34	0.02946048	8.79826640	0.25920112		34.00000000	1.01000000	8.88624906	0.747077
35	0.03930128	8.81698800	0.34651895		35.00000000	0.98114286	8.65072480	0.768463
36	0.04941747	8.80562310	0.43515164		36.00000000	0.95388889	8.39958603	0.789808
37	0.05926870	8.80329320	0.52175973		37.00000000	0.92810811	8.17040780	0.811185
38	0.06940498	8.81459620	0.61177689		38.00000000	0.90368421	7.96561141	0.832683
39	0.07954945	8.80683800	0.70057915		39.00000000	0.88051282	7.75453377	0.854062
40	0.08935008	8.79983230	0.78626568		40.00000000	0.85850000	7.55465603	0.875424
41	0.09950199	8.80427460	0.87604284		41.00000000	0.83756098	7.37411682	0.896807
42	0.10931823	8.80846310	0.96292560		42.00000000	0.81761905	7.20196721	0.918284
43	0.11946122	8.80287460	1.05160214		43.00000000	0.79860465	7.03001660	0.939673
44	0.12930501	8.81102850	1.13931013		44.00000000	0.78045455	6.87660724	0.961031
45	0.13947329	8.80062480	1.22745209		45.00000000	0.76311111	6.71585457	0.982393
46	0.14926274	8.81268020	1.31540479		46.00000000	0.74652174	6.57885735	1.003882
47	0.15941763	8.79978370	1.40284066		47.00000000	0.73063830	6.42945898	1.025260
48	0.16956210	8.80942820	1.49374515		48.00000000	0.71541667	6.30241176	1.046632
49	0.17936346	8.79567340	1.57762241		49.00000000	0.70081633	6.16415152	1.067995
50	0.18950868	8.79985240	1.66764841		50.00000000	0.68680000	6.04373863	1.089470
51	0.19931003	8.80721000	1.75536529		51.00000000	0.67333333	5.93018807	1.110852
52	0.20943815	8.80862520	1.84486217		52.00000000	0.66038462	5.81708056	1.132239
53	0.21927671	8.80656910	1.93107550		53.00000000	0.64792453	5.70599213	1.153586
54	0.22942342	8.80360890	2.01975406		54.00000000	0.63592593	5.59844314	1.175051
55	0.23923892	8.80792430	2.10719830		55.00000000	0.62436364	5.49934764	1.196421
56	0.24938861	8.80597500	2.19610986		56.00000000	0.61321429	5.39994967	1.217807
57	0.25952041	8.80788900	2.28582696		57.00000000	0.60245614	5.30636681	1.239299
58	0.26937091	8.81179430	2.37364105		58.00000000	0.59206897	5.21718994	1.260689
59	0.27951613	8.81762890	2.46466951		59.00000000	0.58203390	5.13215892	1.282038
60	0.28933012	8.79531290	2.54474894		60.00000000	0.57233333	5.03385075	1.303415
61	0.29949024	8.80628400	2.63739611		61.00000000	0.56295082	4.95750480	1.324908
62	0.30930871	8.80477050	2.72339221		62.00000000	0.55387097	4.87670676	1.346285
63	0.31947625	8.80838490	2.81406978		63.00000000	0.54507937	4.80126885	1.367634
64	0.32927909	8.79961200	2.89752823		64.00000000	0.53656250	4.72154181	1.389003
65	0.33940646	8.81507400	2.99189306		65.00000000	0.52830769	4.65707140	1.410530
66	0.34925395	8.79596520	3.07202559		66.00000000	0.52030303	4.57656735	1.431916
67	0.35936791	8.80335330	3.16364268		67.00000000	0.51253731	4.51204705	1.453270
68	0.36953548	8.80022620	3.25199581		68.00000000	0.50500000	4.44411423	1.474649
69	0.37937108	8.81211660	3.34306219		69.00000000	0.49768116	4.38562441	1.496127
70	0.38953638	8.79209900	3.42484242		70.00000000	0.49057143	4.31315257	1.517505
71	0.39936304	8.79418950	3.51207425		71.00000000	0.48366197	4.25341503	1.538859
72	0.40947327	8.79834370	3.60268657		72.00000000	0.47694444	4.19632115	1.560235
73	0.41931334	8.78872110	3.68522800		73.00000000	0.47041096	4.13431072	1.581713
74	0.42943549	8.79545780	3.77708173		74.00000000	0.46405405	4.08156785	1.603092
75	0.43927702	8.77545360	3.85485511		75.00000000	0.45786667	4.01798769	1.624450
76	0.44945946	8.79148290	3.95141516		76.00000000	0.45184211	3.97236214	1.645819
77	0.45956597	8.77281000	4.03168494		77.00000000	0.44597403	3.91244539	1.667299
78	0.46940231	8.75837140	4.11119977		78.00000000	0.44025641	3.85592915	1.688671
79	0.47957358	8.74478150	4.19376617		79.00000000	0.43468354	3.80121262	1.710049
80	0.48935708	8.73690510	4.27546637		80.00000000	0.42925000	3.75031651	1.731428
81	0.49950454	8.69581790	4.34360052		81.00000000	0.42395062	3.68659737	1.752903
82	0.50933564	8.66177850	4.41175250		82.00000000	0.41878049	3.62738383	1.774287
83	0.51944369	8.61274720	4.47383719		83.00000000	0.41373494	3.56339444	1.795675
84	0.52923387	8.52294350	4.51063037		84.00000000	0.40880952	3.48426047	1.817023
85	0.53939098	8.43788720	4.55132025		85.00000000	0.40400000	3.40890643	1.838494
86	0.54951161	8.27354050	4.54640656		86.00000000	0.39930233	3.30364396	1.859867
87	0.55934948	8.06850720	4.51311531		87.00000000	0.39471264	3.18474181	1.881244
88	0.56943589	7.77944560	4.42989553		88.00000000	0.39022727	3.03575184	1.902721
89	0.57927966	7.36921220	4.26883474		89.00000000	0.38584270	2.84335671	1.924098
90	0.58936906	6.86945530	4.04864441		90.00000000	0.38155556	2.62107883	1.945457
91	0.59916747	6.16994860	3.69683249		91.00000000	0.37736264	2.32830808	1.966840
92	0.60927248	5.29833080	3.22812715		92.00000000	0.37326087	1.97765956	1.988398
93	0.61906415	4.22283650	2.61420669		93.00000000	0.36924731	1.55927103	2.009798
94	0.62918925	2.90359430	1.82691032		94.00000000	0.36531915	1.06073860	2.031161
95	0.63931066	1.30756520	0.83594037		95.00000000	0.36147368	0.47265041	2.052539
96	0.64903837	-0.45734459	-0.29683419		96.00000000	0.35770833	-0.16359597	2.074027
97	0.65910619	-2.57773760	-1.69900281		97.00000000	0.35402062	-0.91257226	2.095399
98	0.66890234	-4.90335750	-3.27986731		98.00000000	0.35040816	-1.71817650	2.116751
99	0.67910933	-7.64477730	-5.19163959		99.00000000	0.34686869	-2.65173386	2.138188
100	0.68693238	-9.99385830	-6.86510487		100.00000000	0.34340000	-3.43189094	2.159695
101	0.68695247	-10.00003400	-6.86954806		101.00000000	0.34000000	-3.40001156	2.181071
