# Supplementary material for: Study on the Electrical Injection Regeneration of Industrialized B-Doped Czochralski Silicon PERC Solar Cells
Source: Hindawi journal article supplement (doi:10.1155/2019/5357370), 2019-06-20
Supplement: f1 [file 5357370.f1.zip › section3.2/IVRawData_1-2-60min.csv]

14:12 02/04/2018
Test Lot:	JK-PERC
Recipe:	Recipe_YJX-LID
Cell Name:	1-2-60min
Test Order:	2
Test Condition:	Light
1	-0.29996693	8.81524940	-2.64428330		1.00000000	34.34000000	302.71566440	0.000000
2	-0.29018408	8.82493500	-2.56085564		2.00000000	17.17000000	151.52413395	0.061780
3	-0.28006479	8.80981160	-2.46731804		3.00000000	11.44666667	100.84297678	0.083266
4	-0.27022687	8.83171080	-2.38656557		4.00000000	8.58500000	75.82023722	0.104706
5	-0.26004508	8.80867390	-2.29065231		5.00000000	6.86800000	60.49797235	0.126084
6	-0.24989828	8.82107830	-2.20437229		6.00000000	5.72333333	50.48597147	0.147460
7	-0.24009237	8.79817680	-2.11237512		7.00000000	4.90571429	43.16134162	0.168972
8	-0.22993365	8.81946280	-2.02789127		8.00000000	4.29250000	37.85754407	0.190368
9	-0.22011583	8.81759360	-1.94089193		9.00000000	3.81555556	33.64401825	0.211731
10	-0.21002483	8.81171800	-1.85067957		10.00000000	3.43400000	30.25943961	0.233109
11	-0.20019807	8.81706620	-1.76515964		11.00000000	3.12181818	27.52527757	0.254599
12	-0.19001479	8.81978320	-1.67588925		12.00000000	2.86166667	25.23927959	0.275966
13	-0.18022302	8.82130240	-1.58980176		13.00000000	2.64153846	23.30180957	0.297335
14	-0.17008515	8.81357380	-1.49905802		14.00000000	2.45285714	21.61843745	0.318707
15	-0.16026358	8.81307130	-1.41241436		15.00000000	2.28933333	20.17605790	0.340227
16	-0.15011455	8.81597710	-1.32340644		16.00000000	2.14625000	18.92129085	0.361622
17	-0.13998188	8.81515410	-1.23396184		17.00000000	2.02000000	17.80661128	0.382978
18	-0.13012907	8.81219860	-1.14672321		18.00000000	1.90777778	16.81171666	0.404353
19	-0.12003065	8.82274250	-1.05899952		19.00000000	1.80736842	15.94594618	0.425836
20	-0.11018081	8.81075000	-0.97077557		20.00000000	1.71700000	15.12805775	0.447210
21	-0.10000572	8.82812120	-0.88286262		21.00000000	1.63523810	14.43608010	0.468568
22	-0.09024074	8.80643750	-0.79469943		22.00000000	1.56090909	13.74604835	0.489950
23	-0.08005969	8.83081630	-0.70699243		23.00000000	1.49304348	13.18479268	0.511426
24	-0.07023442	8.80574320	-0.61846625		24.00000000	1.43083333	12.59955090	0.532815
25	-0.06008538	8.81799130	-0.52983238		25.00000000	1.37360000	12.11239285	0.554155
26	-0.04992369	8.81810760	-0.44023249		26.00000000	1.32076923	11.64668519	0.575527
27	-0.04013787	8.81323150	-0.35374430		27.00000000	1.27185185	11.20912480	0.597011
28	-0.02993971	8.81691930	-0.26397597		28.00000000	1.22642857	10.81332174	0.618383
29	-0.02016132	8.80895420	-0.17760014		29.00000000	1.18413793	10.43101680	0.639732
30	-0.00999814	8.81648450	-0.08814845		30.00000000	1.14466667	10.09193592	0.661105
31	-0.00069833	8.81288430	-0.00615430		31.00000000	1.10774194	9.76240151	0.682709
32	0.00944827	8.81423470	0.08327926		32.00000000	1.07312500	9.45877561	0.704082
33	0.01926656	8.82406040	0.17000932		33.00000000	1.04060606	9.18237073	0.725482
34	0.02939894	8.80562110	0.25887592		34.00000000	1.01000000	8.89367731	0.746826
35	0.03923808	8.81671620	0.34595099		35.00000000	0.98114286	8.65045812	0.768306
36	0.04940096	8.82126240	0.43577886		36.00000000	0.95388889	8.41450419	0.789698
37	0.05917312	8.81389900	0.52154589		37.00000000	0.92810811	8.18025113	0.811088
38	0.06934196	8.81734180	0.61141174		38.00000000	0.90368421	7.96809256	0.832510
39	0.07948996	8.81169410	0.70044122		39.00000000	0.88051282	7.75880963	0.853967
40	0.08930603	8.80857370	0.78665872		40.00000000	0.85850000	7.56216052	0.875345
41	0.09943096	8.81152250	0.87613811		41.00000000	0.83756098	7.38018738	0.896712
42	0.10926191	8.81397250	0.96303147		42.00000000	0.81761905	7.20647180	0.918071
43	0.11939428	8.80693340	1.05149747		43.00000000	0.79860465	7.03325798	0.939561
44	0.12922746	8.81352520	1.13894948		44.00000000	0.78045455	6.87855580	0.960956
45	0.13938291	8.81521890	1.22869086		45.00000000	0.76311111	6.72699149	0.982321
46	0.14920194	8.81997200	1.31595693		46.00000000	0.74652174	6.58430084	1.003667
47	0.15933508	8.80574990	1.40306486		47.00000000	0.73063830	6.43381812	1.025140
48	0.16950168	8.81628040	1.49437434		48.00000000	0.71541667	6.30731394	1.046520
49	0.17931476	8.80701640	1.57922803		49.00000000	0.70081633	6.17210088	1.067893
50	0.18943226	8.81133560	1.66915122		50.00000000	0.68680000	6.05162529	1.089261
51	0.19924460	8.81170080	1.75568380		51.00000000	0.67333333	5.93321187	1.110741
52	0.20938145	8.81937790	1.84661413		52.00000000	0.66038462	5.82418148	1.132131
53	0.21919973	8.81177620	1.93153896		53.00000000	0.64792453	5.70936594	1.153524
54	0.22935519	8.82762720	2.02466211		54.00000000	0.63592593	5.61371700	1.174999
55	0.23918836	8.81441120	2.10830456		55.00000000	0.62436364	5.50339783	1.196388
56	0.24933265	8.81268410	2.19728988		56.00000000	0.61321429	5.40406379	1.217747
57	0.25947469	8.81112860	2.28626486		57.00000000	0.60245614	5.30831853	1.239123
58	0.26929003	8.81541440	2.37390321		58.00000000	0.59206897	5.21933328	1.260618
59	0.27948266	8.80929950	2.46204646		59.00000000	0.58203390	5.12731093	1.281997
60	0.28929427	8.81970690	2.55149067		60.00000000	0.57233333	5.04781225	1.303345
61	0.29943261	8.80360220	2.63608558		61.00000000	0.56295082	4.95599507	1.324732
62	0.30923304	8.81279280	2.72520671		62.00000000	0.55387097	4.88115008	1.346218
63	0.31939667	8.80670640	2.81283270		63.00000000	0.54507937	4.80035393	1.367591
64	0.32921124	8.81713490	2.90269991		64.00000000	0.53656250	4.73094394	1.388951
65	0.33937338	8.81377890	2.99116194		65.00000000	0.52830769	4.65638719	1.410331
66	0.34920061	8.80854030	3.07594765		66.00000000	0.52030303	4.58311021	1.431812
67	0.35933298	8.79760070	3.16126808		67.00000000	0.51253731	4.50909863	1.453190
68	0.36951002	8.81132030	3.25587114		68.00000000	0.50500000	4.44971675	1.474549
69	0.37930524	8.81004520	3.34169631		69.00000000	0.49768116	4.38459351	1.495922
70	0.38947707	8.79128070	3.42400225		70.00000000	0.49057143	4.31275113	1.517399
71	0.39930356	8.80606370	3.51629258		71.00000000	0.48366197	4.25915813	1.538786
72	0.40941879	8.80208300	3.60373817		72.00000000	0.47694444	4.19810459	1.560136
73	0.41925123	8.79979230	3.68932375		73.00000000	0.47041096	4.13951873	1.581513
74	0.42939702	8.79606060	3.77700221		74.00000000	0.46405405	4.08184758	1.603000
75	0.43921232	8.79027080	3.86079523		75.00000000	0.45786667	4.02477199	1.624395
76	0.44936407	8.78948500	3.94967875		76.00000000	0.45184211	3.97145941	1.645759
77	0.45950091	8.78279970	4.03570445		77.00000000	0.44597403	3.91690054	1.667107
78	0.46937427	8.76343920	4.11333288		78.00000000	0.44025641	3.85816028	1.688601
79	0.47949624	8.75399300	4.19750673		79.00000000	0.43468354	3.80521670	1.709986
80	0.48934057	8.73648830	4.27511816		80.00000000	0.42925000	3.75013760	1.731372
81	0.49944168	8.70742610	4.34885152		81.00000000	0.42395062	3.69151867	1.752708
82	0.50927711	8.67296890	4.41694454		82.00000000	0.41878049	3.63207015	1.774181
83	0.51939160	8.62245080	4.47842852		83.00000000	0.41373494	3.56740916	1.795577
84	0.52920473	8.53978630	4.51929530		84.00000000	0.40880952	3.49114597	1.816960
85	0.53933632	8.44465350	4.55450834		85.00000000	0.40400000	3.41164001	1.838451
86	0.54947692	8.27923110	4.54924640		86.00000000	0.39930233	3.30591623	1.859848
87	0.55928475	8.07303620	4.51512603		87.00000000	0.39471264	3.18652946	1.881189
88	0.56940079	7.77170520	4.42521508		88.00000000	0.39022727	3.03273132	1.902557
89	0.57918262	7.38615700	4.27793376		89.00000000	0.38584270	2.84989473	1.924039
90	0.58930379	6.85501150	4.03968426		90.00000000	0.38155556	2.61556772	1.945414
91	0.59909606	6.17811110	3.70128202		91.00000000	0.37736264	2.33138830	1.966763
92	0.60923588	5.29362870	3.22506854		92.00000000	0.37326087	1.97590445	1.988244
93	0.61902887	4.23769330	2.62325449		93.00000000	0.36924731	1.56475686	2.009752
94	0.62912476	2.89586260	1.82185886		94.00000000	0.36531915	1.05791406	2.031214
95	0.63924372	1.32001080	0.84380861		95.00000000	0.36147368	0.47714917	2.052602
96	0.64900178	-0.43610150	-0.28303065		96.00000000	0.35770833	-0.15599714	2.073991
97	0.65908724	-2.53462460	-1.67053873		97.00000000	0.35402062	-0.89730937	2.095487
98	0.66882068	-4.84387590	-3.23968437		98.00000000	0.35040816	-1.69733366	2.116867
99	0.67903346	-7.55880170	-5.13267927		99.00000000	0.34686869	-2.62191162	2.138210
100	0.68722403	-9.99331090	-6.86764339		100.00000000	0.34340000	-3.43170296	2.159592
101	0.68722105	-10.00006000	-6.87225173		101.00000000	0.34000000	-3.40002040	2.181077
14:12 02/04/2018
Test Lot:	JK-PERC
Recipe:	Recipe_YJX-LID
Cell Name:	1-2-60min
Test Order:	3
Test Condition:	Light
1	-0.30000859	8.81212810	-2.64371413		1.00000000	34.34000000	302.60847895	0.000000
2	-0.29015356	8.81711290	-2.55831670		2.00000000	17.17000000	151.38982849	0.021503
3	-0.28000823	8.81149770	-2.46729187		3.00000000	11.44666667	100.86227701	0.042892
4	-0.27021423	8.82176780	-2.38376719		4.00000000	8.58500000	75.73487656	0.064306
5	-0.26006967	8.82294750	-2.29458104		5.00000000	6.86800000	60.59600343	0.085809
6	-0.24993625	8.81245040	-2.20255081		6.00000000	5.72333333	50.43659112	0.107215
7	-0.24007450	8.81520080	-2.11630492		7.00000000	4.90571429	43.24485650	0.128582
8	-0.22994481	8.82147220	-2.02845175		8.00000000	4.29250000	37.86616942	0.149974
9	-0.22014856	8.80780790	-1.93902623		9.00000000	3.81555556	33.60668037	0.171466
10	-0.20999061	8.81595040	-1.85126680		10.00000000	3.43400000	30.27397367	0.192861
11	-0.20015788	8.81633380	-1.76465868		11.00000000	3.12181818	27.52299115	0.214207
12	-0.19006616	8.81353000	-1.67515380		12.00000000	2.86166667	25.22138502	0.235633
13	-0.18023716	8.81138420	-1.58813886		13.00000000	2.64153846	23.27561026	0.257146
14	-0.17009482	8.81260400	-1.49897829		14.00000000	2.45285714	21.61605867	0.278536
15	-0.16028219	8.80625250	-1.41148544		15.00000000	2.28933333	20.16044739	0.299895
16	-0.15010859	8.82384200	-1.32453448		16.00000000	2.14625000	18.93817089	0.321263
17	-0.13995287	8.82864670	-1.23559444		17.00000000	2.02000000	17.83386633	0.342747
18	-0.13014470	8.79985240	-1.14525415		18.00000000	1.90777778	16.78816286	0.364170
19	-0.12001278	8.82981680	-1.05969086		19.00000000	1.80736842	15.95873205	0.385526
20	-0.11017039	8.80582810	-0.97014152		20.00000000	1.71700000	15.11960685	0.406915
21	-0.10003624	8.80725670	-0.88104484		21.00000000	1.63523810	14.40196167	0.428401
22	-0.09021990	8.81040570	-0.79487392		22.00000000	1.56090909	13.75224235	0.449790
23	-0.08006416	8.81153110	-0.70548786		23.00000000	1.49304348	13.15599904	0.471153
24	-0.07025749	8.81596180	-0.61938737		24.00000000	1.43083333	12.61417201	0.492533
25	-0.06006677	8.81981180	-0.52977764		25.00000000	1.37360000	12.11489349	0.514023
26	-0.04992295	8.82124040	-0.44038232		26.00000000	1.32076923	11.65082290	0.535413
27	-0.04011851	8.81642440	-0.35370183		27.00000000	1.27185185	11.21318570	0.556777
28	-0.02994045	8.81134890	-0.26381574		28.00000000	1.22642857	10.80649004	0.578158
29	-0.02012262	8.81923770	-0.17746614		29.00000000	1.18413793	10.44319388	0.599634
30	-0.00998698	8.82363890	-0.08812147		30.00000000	1.14466667	10.10012533	0.621011
31	-0.00069461	8.82076840	-0.00612698		31.00000000	1.10774194	9.77113506	0.642489
32	0.00944752	8.82031730	0.08333016		32.00000000	1.07312500	9.46530300	0.663858
33	0.01924870	8.82294270	0.16983020		33.00000000	1.04060606	9.18120765	0.685340
34	0.02942350	8.81649590	0.25941216		34.00000000	1.01000000	8.90466086	0.706722
35	0.03923212	8.81383900	0.34578559		35.00000000	0.98114286	8.64763518	0.728124
36	0.04936301	8.82515720	0.43563629		36.00000000	0.95388889	8.41821940	0.749475
37	0.05919842	8.80460640	0.52121879		37.00000000	0.92810811	8.17162659	0.770966
38	0.06936205	8.82820130	0.61234216		38.00000000	0.90368421	7.97790612	0.792362
39	0.07948104	8.80759430	0.70003671		39.00000000	0.88051282	7.75519970	0.813749
40	0.08931942	8.81682970	0.78751414		40.00000000	0.85850000	7.56924830	0.835245
41	0.09942500	8.81628890	0.87655955		41.00000000	0.83756098	7.38417953	0.856635
42	0.10924405	8.80990700	0.96242992		42.00000000	0.81761905	7.20314777	0.877993
43	0.11943075	8.81575970	1.05287279		43.00000000	0.79860465	7.04030670	0.899367
44	0.12922969	8.80118560	1.13737449		44.00000000	0.78045455	6.86892531	0.920843
45	0.13937250	8.81346320	1.22835440		45.00000000	0.76311111	6.72565170	0.942218
46	0.14920269	8.81187820	1.31475593		46.00000000	0.74652174	6.57825864	0.963573
47	0.15932390	8.79950810	1.40197195		47.00000000	0.73063830	6.42925762	0.984956
48	0.16951211	8.82230660	1.49548781		48.00000000	0.71541667	6.31162518	1.006439
49	0.17930509	8.80155280	1.57816322		49.00000000	0.70081633	6.16827190	1.027826
50	0.18946724	8.82009220	1.67111853		50.00000000	0.68680000	6.05763932	1.049177
51	0.19924088	8.81421760	1.75615247		51.00000000	0.67333333	5.93490652	1.070548
52	0.20937996	8.81752010	1.84621201		52.00000000	0.66038462	5.82295462	1.092035
53	0.21919081	8.81124210	1.93134329		53.00000000	0.64792453	5.70901988	1.113404
54	0.22936933	8.81542110	2.02198723		54.00000000	0.63592593	5.60595483	1.134753
55	0.23918390	8.80936430	2.10705811		55.00000000	0.62436364	5.50024673	1.156138
56	0.24932595	8.81153580	2.19694453		56.00000000	0.61321429	5.40335963	1.177620
57	0.25949180	8.81031610	2.28620478		57.00000000	0.60245614	5.30782903	1.199013
58	0.26930639	8.80576320	2.37144830		58.00000000	0.59206897	5.21361911	1.220358
59	0.27946779	8.80252080	2.46002103		59.00000000	0.58203390	5.12336550	1.241735
60	0.28931212	8.80979820	2.54878139		60.00000000	0.57233333	5.04214117	1.263217
61	0.29943261	8.80917930	2.63775555		61.00000000	0.56295082	4.95913471	1.284603
62	0.30925015	8.80867390	2.72408372		62.00000000	0.55387097	4.87886874	1.305960
63	0.31938252	8.80584140	2.81243182		63.00000000	0.54507937	4.79988244	1.327330
64	0.32922018	8.81451990	2.90191783		64.00000000	0.53656250	4.72954083	1.348815
65	0.33937338	8.80393220	2.98782023		65.00000000	0.52830769	4.65118510	1.370204
66	0.34917977	8.80611040	3.07491560		66.00000000	0.52030303	4.58184593	1.391595
67	0.35932556	8.80792620	3.16491301		67.00000000	0.51253731	4.51439083	1.412960
68	0.36947802	8.79854390	3.25086858		68.00000000	0.50500000	4.44326467	1.434437
69	0.37931046	8.82050800	3.34571095		69.00000000	0.49768116	4.38980065	1.455821
70	0.38947037	8.79263780	3.42447190		70.00000000	0.49057143	4.31341689	1.477219
71	0.39927602	8.80591870	3.51599217		71.00000000	0.48366197	4.25908800	1.498722
72	0.40942997	8.79321860	3.60020723		72.00000000	0.47694444	4.19387676	1.520096
73	0.41926613	8.79526230	3.68755559		73.00000000	0.47041096	4.13738777	1.541451
74	0.42937991	8.79263780	3.77538203		74.00000000	0.46405405	4.08025922	1.562834
75	0.43919969	8.80314160	3.86633706		75.00000000	0.45786667	4.03066510	1.584320
76	0.44937670	8.79477500	3.95216697		76.00000000	0.45184211	3.97384965	1.605698
77	0.45952025	8.77971080	4.03445490		77.00000000	0.44597403	3.91552297	1.627061
78	0.46933705	8.76574710	4.11408988		78.00000000	0.44025641	3.85917635	1.648440
79	0.47949475	8.75911810	4.19995114		79.00000000	0.43468354	3.80744450	1.669929
80	0.48928028	8.73256780	4.27267322		80.00000000	0.42925000	3.74845473	1.691314
81	0.49943721	8.72111610	4.35564989		81.00000000	0.42395062	3.69732255	1.712662
82	0.50925553	8.67075440	4.41562963		82.00000000	0.41878049	3.63114276	1.734038
83	0.51940203	8.61818310	4.47630180		83.00000000	0.41373494	3.56564347	1.755526
84	0.52917570	8.54996490	4.52443366		84.00000000	0.40880952	3.49530708	1.776916
85	0.53932738	8.44986340	4.55724269		85.00000000	0.40400000	3.41374481	1.798281
86	0.54946202	8.27668090	4.54772181		86.00000000	0.39930233	3.30489793	1.819667
87	0.55925423	8.07378770	4.51529992		87.00000000	0.39471264	3.18682609	1.841151
88	0.56940746	7.78215550	4.43121740		88.00000000	0.39022727	3.03680932	1.862530
89	0.57919300	7.39550110	4.28342247		89.00000000	0.38584270	2.85350009	1.883889
90	0.58933359	6.84975530	4.03679088		90.00000000	0.38155556	2.61356219	1.905273
91	0.59914070	6.18281080	3.70437359		91.00000000	0.37736264	2.33316179	1.926751
92	0.60922694	5.28742890	3.22124413		92.00000000	0.37326087	1.97359031	1.948140
93	0.61902440	4.22876740	2.61771020		93.00000000	0.36924731	1.56146099	1.969509
94	0.62915158	2.89037700	1.81848526		94.00000000	0.36531915	1.05591007	1.990985
95	0.63924223	1.31580040	0.84111518		95.00000000	0.36147368	0.47562722	2.012494
96	0.64896083	-0.46264666	-0.30023956		96.00000000	0.35770833	-0.16549257	2.033883
97	0.65907085	-2.56577590	-1.69102810		97.00000000	0.35402062	-0.90833757	2.055276
98	0.66882145	-4.88616900	-3.26797464		98.00000000	0.35040816	-1.71215350	2.076638
99	0.67902750	-7.62503860	-5.17761090		99.00000000	0.34686869	-2.64488713	2.098130
100	0.68701786	-9.99355980	-6.86575407		100.00000000	0.34340000	-3.43178844	2.119511
101	0.68696874	-10.00005500	-6.86972518		101.00000000	0.34000000	-3.40001870	2.140893
14:12 02/04/2018
Test Lot:	JK-PERC
Recipe:	Recipe_YJX-LID
Cell Name:	1-2-60min
Test Order:	4
Test Condition:	Light
1	-0.29996726	8.81724640	-2.64488524		1.00000000	34.34000000	302.78424138	0.000000
2	-0.29014361	8.81032090	-2.55625831		2.00000000	17.17000000	151.27320985	0.061746
3	-0.28000069	8.82114890	-2.46992778		3.00000000	11.44666667	100.97275108	0.083296
4	-0.27019644	8.81367400	-2.38142334		4.00000000	8.58500000	75.66539129	0.104701
5	-0.25999993	8.82242200	-2.29382910		5.00000000	6.86800000	60.59239430	0.126072
6	-0.24983765	8.81354710	-2.20195590		6.00000000	5.72333333	50.44286790	0.147451
7	-0.24005124	8.81587980	-2.11626288		7.00000000	4.90571429	43.24818748	0.168937
8	-0.22987556	8.80720520	-2.02456123		8.00000000	4.29250000	37.80492832	0.190324
9	-0.22004002	8.81656740	-1.93999767		9.00000000	3.81555556	33.64010272	0.211676
10	-0.20988297	8.81716820	-1.85057345		10.00000000	3.43400000	30.27815560	0.233051
11	-0.20006157	8.81375220	-1.76329310		11.00000000	3.12181818	27.51493187	0.254550
12	-0.18993279	8.81641580	-1.67452645		12.00000000	2.86166667	25.22964321	0.275921
13	-0.18014340	8.81342030	-1.58767950		13.00000000	2.64153846	23.28098870	0.297266
14	-0.17003472	8.81586840	-1.49900371		14.00000000	2.45285714	21.62406578	0.318645
15	-0.16018431	8.81735040	-1.41240119		15.00000000	2.28933333	20.18585418	0.340125
16	-0.15003617	8.82105350	-1.32347708		16.00000000	2.14625000	18.93218607	0.361510
17	-0.13989772	8.83164790	-1.23552741		17.00000000	2.02000000	17.83992876	0.382878
18	-0.13006070	8.81071470	-1.14592772		18.00000000	1.90777778	16.80888571	0.404257
19	-0.11990140	8.82011700	-1.05754438		19.00000000	1.80736842	15.94120094	0.425787
20	-0.11011945	8.82182600	-0.97145463		20.00000000	1.71700000	15.14707524	0.447164
21	-0.09997356	8.81160930	-0.88092794		21.00000000	1.63523810	14.40907921	0.468524
22	-0.09013654	8.81571290	-0.79461781		22.00000000	1.56090909	13.76052641	0.489889
23	-0.07997352	8.82085510	-0.70543482		23.00000000	1.49304348	13.16992018	0.511374
24	-0.07018711	8.80662440	-0.61811149		24.00000000	1.43083333	12.60081175	0.532747
25	-0.06002707	8.81959820	-0.52941461		25.00000000	1.37360000	12.11460009	0.554148
26	-0.04986778	8.82104020	-0.43988565		26.00000000	1.32076923	11.65055848	0.575503
27	-0.04003001	8.80807590	-0.35258733		27.00000000	1.27185185	11.20256764	0.596974
28	-0.02987890	8.80700110	-0.26314350		28.00000000	1.22642857	10.80115778	0.618379
29	-0.02005676	8.82609180	-0.17702280		29.00000000	1.18413793	10.45131008	0.639762
30	-0.00992724	8.81588170	-0.08751735		30.00000000	1.14466667	10.09124592	0.661234
31	-0.00065139	8.81262210	-0.00574049		31.00000000	1.10774194	9.76211106	0.682736
32	0.00949057	8.81697460	0.08367815		32.00000000	1.07312500	9.46171587	0.704087
33	0.01931243	8.82922270	0.17051376		33.00000000	1.04060606	9.18774265	0.725466
34	0.02944762	8.80394080	0.25925511		34.00000000	1.01000000	8.89198021	0.746954
35	0.03926874	8.83208850	0.34682495		35.00000000	0.98114286	8.66554055	0.768331
36	0.04943444	8.80764580	0.43540102		36.00000000	0.95388889	8.40151547	0.789695
37	0.05921610	8.80738160	0.52153882		37.00000000	0.92810811	8.17420227	0.811071
38	0.06939372	8.82528590	0.61241939		38.00000000	0.90368421	7.97527152	0.832558
39	0.07954602	8.80869200	0.70069638		39.00000000	0.88051282	7.75616624	0.853952
40	0.08936937	8.81413940	0.78771410		40.00000000	0.85850000	7.56693867	0.875313
41	0.09950233	8.80812450	0.87642887		41.00000000	0.83756098	7.37734135	0.896680
42	0.10931972	8.82072640	0.96427934		42.00000000	0.81761905	7.21199392	0.918165
43	0.11948468	8.80407710	1.05195233		43.00000000	0.79860465	7.03097692	0.939539
44	0.12931174	8.81464000	1.13983644		44.00000000	0.78045455	6.87942585	0.960881
45	0.13945735	8.80990030	1.22860535		45.00000000	0.76311111	6.72293281	0.982264
46	0.14926134	8.81404590	1.31559630		46.00000000	0.74652174	6.57987687	1.003763
47	0.15942036	8.79617020	1.40228862		47.00000000	0.73063830	6.42681882	1.025154
48	0.16957489	8.82624240	1.49670908		48.00000000	0.71541667	6.31444092	1.046512
49	0.17940122	8.80405710	1.57945858		49.00000000	0.70081633	6.17002696	1.067895
50	0.18955351	8.82736680	1.67325836		50.00000000	0.68680000	6.06263552	1.089374
51	0.19933146	8.79708290	1.75353538		51.00000000	0.67333333	5.92336915	1.110754
52	0.20946889	8.82178120	1.84788872		52.00000000	0.66038462	5.82576858	1.132121
53	0.21928108	8.80169580	1.93004536		53.00000000	0.64792453	5.70283460	1.153499
54	0.22942966	8.80629730	2.02042580		54.00000000	0.63592593	5.60015276	1.174977
55	0.23925598	8.80889420	2.10758061		55.00000000	0.62436364	5.49995322	1.196350
56	0.24937852	8.81330010	2.19784774		56.00000000	0.61321429	5.40444153	1.217743
57	0.25954050	8.81155400	2.28695513		57.00000000	0.60245614	5.30857481	1.239092
58	0.26935491	8.82433610	2.37687826		58.00000000	0.59206897	5.22461555	1.260569
59	0.27949604	8.80662250	2.46141611		59.00000000	0.58203390	5.12575282	1.281956
60	0.28931865	8.80428790	2.54724469		60.00000000	0.57233333	5.03898744	1.303330
61	0.29949701	8.80842490	2.63809692		61.00000000	0.56295082	4.95871002	1.324812
62	0.30928537	8.80500510	2.72325926		62.00000000	0.55387097	4.87683670	1.346203
63	0.31944662	8.81160070	2.81483606		63.00000000	0.54507937	4.80302171	1.367565
64	0.32925954	8.81182100	2.90137613		64.00000000	0.53656250	4.72809271	1.388947
65	0.33942747	8.80257230	2.98783485		65.00000000	0.52830769	4.65046666	1.410436
66	0.34924039	8.80735870	3.07588539		66.00000000	0.52030303	4.58249542	1.431794
67	0.35937932	8.79790780	3.16178612		67.00000000	0.51253731	4.50925603	1.453149
68	0.36954501	8.80994890	3.25567265		68.00000000	0.50500000	4.44902419	1.474528
69	0.37936166	8.80591960	3.34062828		69.00000000	0.49768116	4.38254028	1.495998
70	0.38950208	8.80985550	3.43145704		70.00000000	0.49057143	4.32186340	1.517388
71	0.39932913	8.79828450	3.51341129		71.00000000	0.48366197	4.25539563	1.538731
72	0.40945464	8.80318930	3.60450671		72.00000000	0.47694444	4.19863223	1.560099
73	0.41930702	8.80544760	3.69218599		73.00000000	0.47041096	4.14217905	1.581591
74	0.42944667	8.78472810	3.77257223		74.00000000	0.46405405	4.07658869	1.602969
75	0.43926778	8.79776760	3.86457584		75.00000000	0.45786667	4.02820453	1.624332
76	0.44944391	8.78791430	3.94967456		76.00000000	0.45184211	3.97074970	1.645725
77	0.45955899	8.78381060	4.03667913		77.00000000	0.44597403	3.91735138	1.667209
78	0.46940839	8.76808260	4.11581154		78.00000000	0.44025641	3.86020457	1.688599
79	0.47956592	8.74752520	4.19501497		79.00000000	0.43468354	3.80240526	1.709947
80	0.48939371	8.74707790	4.28076491		80.00000000	0.42925000	3.75468319	1.731321
81	0.49951255	8.71342950	4.35246739		81.00000000	0.42395062	3.69406382	1.752794
82	0.50935149	8.65992930	4.41094789		82.00000000	0.41878049	3.62660942	1.774165
83	0.51947850	8.61938190	4.47758358		83.00000000	0.41373494	3.56613945	1.795524
84	0.52926165	8.53940490	4.51957953		84.00000000	0.40880952	3.49099005	1.816904
85	0.53937829	8.43192770	4.54799874		85.00000000	0.40400000	3.40649879	1.838400
86	0.54951346	8.27785300	4.54879164		86.00000000	0.39930233	3.30536595	1.859772
87	0.55933082	8.08213420	4.52058675		87.00000000	0.39471264	3.19012056	1.881162
88	0.56943029	7.77872710	4.42944283		88.00000000	0.39022727	3.03547146	1.902506
89	0.57923800	7.39333110	4.28249832		89.00000000	0.38584270	2.85266281	1.923982
90	0.58936280	6.84467650	4.03399771		90.00000000	0.38155556	2.61162434	1.945369
91	0.59912437	6.17503120	3.69961168		91.00000000	0.37736264	2.33022606	1.966759
92	0.60926849	5.29100750	3.22364415		92.00000000	0.37326087	1.97492606	1.988321
93	0.61907250	4.22956130	2.61840509		93.00000000	0.36924731	1.56175414	2.009726
94	0.62920541	2.89627150	1.82234970		94.00000000	0.36531915	1.05806344	2.031078
95	0.63926989	1.30591580	0.83483265		95.00000000	0.36147368	0.47205420	2.052466
96	0.64902329	-0.45715880	-0.29670671		96.00000000	0.35770833	-0.16352951	2.074002
97	0.65911382	-2.56761120	-1.69234803		97.00000000	0.35402062	-0.90898731	2.095390
98	0.66885233	-4.87660650	-3.26172962		98.00000000	0.35040816	-1.70880273	2.116755
99	0.67906421	-7.61368510	-5.17018106		99.00000000	0.34686869	-2.64094895	2.138134
100	0.68703955	-9.99354270	-6.86595908		100.00000000	0.34340000	-3.43178256	2.159617
101	0.68705446	-10.00003000	-6.87056521		101.00000000	0.34000000	-3.40001020	2.181014
