# Supplementary material for: Study on the Electrical Injection Regeneration of Industrialized B-Doped Czochralski Silicon PERC Solar Cells
Source: Hindawi journal article supplement (doi:10.1155/2019/5357370), 2019-06-20
Supplement: f1 [file 5357370.f1.zip › section3.2/IVRawData_1-2-after.csv]

11:36 02/04/2018
Test Lot:	JK-PERC
Recipe:	Recipe_YJX-LID
Cell Name:	1-2-after
Test Order:	2
Test Condition:	Light
1	-0.29989547	8.87676050	-2.66210026		1.00000000	34.34000000	304.82795557	0.000000
2	-0.29006010	8.86490350	-2.57135480		2.00000000	17.17000000	152.21039310	0.061794
3	-0.27989724	8.86903570	-2.48241861		3.00000000	11.44666667	101.52089531	0.083211
4	-0.27010655	8.88066390	-2.39872549		4.00000000	8.58500000	76.24049958	0.104706
5	-0.25994444	8.86498360	-2.30440320		5.00000000	6.86800000	60.88470736	0.126075
6	-0.24980837	8.87199780	-2.21629931		6.00000000	5.72333333	50.77740074	0.147438
7	-0.23998417	8.87567710	-2.13002200		7.00000000	4.90571429	43.54153594	0.168868
8	-0.22981907	8.87307070	-2.03920086		8.00000000	4.29250000	38.08765598	0.190360
9	-0.22003135	8.88140010	-1.95418645		9.00000000	3.81555556	33.88747549	0.211752
10	-0.20990050	8.86789700	-1.86137601		10.00000000	3.43400000	30.45235830	0.233115
11	-0.20006736	8.87555890	-1.77570964		11.00000000	3.12181818	27.70788115	0.254492
12	-0.18993725	8.86886220	-1.68452730		12.00000000	2.86166667	25.37972733	0.275979
13	-0.18012646	8.86262700	-1.59639363		13.00000000	2.64153846	23.41097009	0.297351
14	-0.16999039	8.87371830	-1.50844683		14.00000000	2.45285714	21.76596332	0.318749
15	-0.16015652	8.86456300	-1.41971756		15.00000000	2.28933333	20.29393956	0.340087
16	-0.14998993	8.87206460	-1.33072035		16.00000000	2.14625000	19.04166865	0.361567
17	-0.13985759	8.86753370	-1.24019189		17.00000000	2.02000000	17.91241807	0.382941
18	-0.13006093	8.85600380	-1.15182009		18.00000000	1.90777778	16.89528725	0.404321
19	-0.11994273	8.86935230	-1.06381433		19.00000000	1.80736842	16.03018726	0.425738
20	-0.11007982	8.87700750	-0.97717939		20.00000000	1.71700000	15.24182188	0.447197
21	-0.09991250	8.87122340	-0.88634613		21.00000000	1.63523810	14.50656246	0.468568
22	-0.09010021	8.86646370	-0.79887028		22.00000000	1.56090909	13.83974379	0.489924
23	-0.07998350	8.85311990	-0.70810354		23.00000000	1.49304348	13.21809293	0.511295
24	-0.07014293	8.85938260	-0.62142301		24.00000000	1.43083333	12.67629994	0.532784
25	-0.05998379	8.87683580	-0.53246622		25.00000000	1.37360000	12.19322165	0.554158
26	-0.04984400	8.86820790	-0.44202695		26.00000000	1.32076923	11.71285613	0.575534
27	-0.04001013	8.87118820	-0.35493738		27.00000000	1.27185185	11.28283714	0.596895
28	-0.02984950	8.86505700	-0.26461751		28.00000000	1.22642857	10.87235919	0.618371
29	-0.02005284	8.85979180	-0.17766401		29.00000000	1.18413793	10.49121553	0.639754
30	-0.00990264	8.86260510	-0.08776315		30.00000000	1.14466667	10.14472864	0.661137
31	-0.00065379	8.86220840	-0.00579404		31.00000000	1.10774194	9.81703989	0.682608
32	0.00947983	8.86452960	0.08403426		32.00000000	1.07312500	9.51274833	0.704085
33	0.01929407	8.85965350	0.17093881		33.00000000	1.04060606	9.21940913	0.725474
34	0.02944250	8.87158200	0.26120159		34.00000000	1.01000000	8.96029782	0.746904
35	0.03924484	8.86890220	0.34805863		35.00000000	0.98114286	8.70166004	0.768379
36	0.04939997	8.86116030	0.43774101		36.00000000	0.95388889	8.45256235	0.789755
37	0.05923653	8.87295910	0.52560334		37.00000000	0.92810811	8.23506528	0.811108
38	0.06938050	8.85802750	0.61457437		38.00000000	0.90368421	8.00485959	0.832478
39	0.07951330	8.85926250	0.70442916		39.00000000	0.88051282	7.80069421	0.853959
40	0.08935805	8.86567780	0.79221972		40.00000000	0.85850000	7.61118439	0.875346
41	0.09949904	8.86613370	0.88217178		41.00000000	0.83756098	7.42592759	0.896690
42	0.10929244	8.85667130	0.96796722		42.00000000	0.81761905	7.24138315	0.918072
43	0.11947064	8.87845610	1.06071483		43.00000000	0.79860465	7.09037634	0.939544
44	0.12927446	8.85875510	1.14521078		44.00000000	0.78045455	6.91385568	0.960922
45	0.13943703	8.86437420	1.23602201		45.00000000	0.76311111	6.76450245	0.982286
46	0.14924756	8.87328430	1.32431603		46.00000000	0.74652174	6.62409963	1.003660
47	0.15939227	8.86910060	1.41366608		47.00000000	0.73063830	6.48010457	1.025131
48	0.16953549	8.85039420	1.50045592		48.00000000	0.71541667	6.33171952	1.046513
49	0.17936237	8.86617850	1.59025879		49.00000000	0.70081633	6.21356265	1.067847
50	0.18949518	8.86605360	1.68007442		50.00000000	0.68680000	6.08920561	1.089218
51	0.19928709	8.85963820	1.76561152		51.00000000	0.67333333	5.96548972	1.110701
52	0.20942064	8.86148260	1.85577736		52.00000000	0.66038462	5.85198678	1.132076
53	0.21924901	8.85928630	1.94238975		53.00000000	0.64792453	5.74014890	1.153422
54	0.22940563	8.86320780	2.03326977		54.00000000	0.63592593	5.63634363	1.174804
55	0.23925412	8.87641330	2.12371845		55.00000000	0.62436364	5.54210969	1.196275
56	0.24938022	8.85274790	2.20770022		56.00000000	0.61321429	5.42863148	1.217664
57	0.25952715	8.87350940	2.30291661		57.00000000	0.60245614	5.34590022	1.239029
58	0.26934510	8.86274910	2.38713804		58.00000000	0.59206897	5.24735869	1.260385
59	0.27951363	8.86127850	2.47684812		59.00000000	0.58203390	5.15756447	1.281866
60	0.28934053	8.84450530	2.55907385		60.00000000	0.57233333	5.06200520	1.303231
61	0.29948300	8.87514020	2.65795361		61.00000000	0.56295082	4.99626745	1.324609
62	0.30929428	8.85202500	2.73788070		62.00000000	0.55387097	4.90287965	1.345964
63	0.31944939	8.86718650	2.83261732		63.00000000	0.54507937	4.83332039	1.367444
64	0.32927406	8.85947990	2.91719692		64.00000000	0.53656250	4.75366468	1.388830
65	0.33941206	8.86038400	3.00732119		65.00000000	0.52830769	4.68100902	1.410219
66	0.34923005	8.85949130	3.09400059		66.00000000	0.52030303	4.60962017	1.431694
67	0.35939410	8.86412720	3.18571502		67.00000000	0.51253731	4.54319594	1.453074
68	0.36955220	8.85446640	3.27218754		68.00000000	0.50500000	4.47150553	1.474430
69	0.37936199	8.85142420	3.35789390		69.00000000	0.49768116	4.40518706	1.495806
70	0.38950965	8.85271260	3.44821699		70.00000000	0.49057143	4.34288787	1.517277
71	0.39932019	8.85262110	3.53503034		71.00000000	0.48366197	4.28167618	1.538645
72	0.40946862	8.84467220	3.62161572		72.00000000	0.47694444	4.21841727	1.559987
73	0.41928509	8.86157230	3.71552514		73.00000000	0.47041096	4.16858072	1.581367
74	0.42945361	8.85245040	3.80171678		74.00000000	0.46405405	4.10801550	1.602885
75	0.43924776	8.84987740	3.88728882		75.00000000	0.45786667	4.05206387	1.624261
76	0.44942895	8.84087180	3.97334373		76.00000000	0.45184211	3.99467813	1.645657
77	0.45955205	8.83177380	4.05865975		77.00000000	0.44597403	3.93874172	1.667034
78	0.46942437	8.83811660	4.14882732		78.00000000	0.44025641	3.89103749	1.688520
79	0.47955045	8.82925510	4.23407326		79.00000000	0.43468354	3.83793190	1.709896
80	0.48936394	8.80693630	4.30979705		80.00000000	0.42925000	3.78037741	1.731252
81	0.49952206	8.78932670	4.39046258		81.00000000	0.42395062	3.72624048	1.752631
82	0.50930804	8.74945160	4.45616605		82.00000000	0.41878049	3.66409961	1.774109
83	0.51946759	8.70478630	4.52185436		83.00000000	0.41373494	3.60147424	1.795483
84	0.52924764	8.64970020	4.57783342		84.00000000	0.40880952	3.53607982	1.816823
85	0.53937519	8.55133150	4.61237605		85.00000000	0.40400000	3.45473793	1.838198
86	0.54952067	8.41953370	4.62670780		86.00000000	0.39930233	3.36193939	1.859671
87	0.55929917	8.23325060	4.60485023		87.00000000	0.39471264	3.24976811	1.881050
88	0.56945950	7.97063060	4.53895132		88.00000000	0.39022727	3.11035744	1.902415
89	0.57926035	7.60908560	4.40764159		89.00000000	0.38584270	2.93591011	1.923790
90	0.58936936	7.15773200	4.21854793		90.00000000	0.38155556	2.73107241	1.945269
91	0.59919178	6.51543710	3.90399635		91.00000000	0.37736264	2.45868253	1.966638
92	0.60929108	5.71653410	3.48303324		92.00000000	0.37326087	2.13375849	1.988114
93	0.61908299	4.74119900	2.93519565		93.00000000	0.36924731	1.75067499	2.009498
94	0.62922841	3.50703860	2.20672832		94.00000000	0.36531915	1.28118836	2.030992
95	0.63933074	2.03916240	1.30369921		95.00000000	0.36147368	0.73710355	2.052377
96	0.64904147	0.36869687	0.23929956		96.00000000	0.35770833	0.13188594	2.073767
97	0.65916610	-1.62790700	-1.07306111		97.00000000	0.35402062	-0.57631264	2.095243
98	0.66889626	-3.82257580	-2.55690666		98.00000000	0.35040816	-1.33946177	2.116634
99	0.67901266	-6.45912840	-4.38582996		99.00000000	0.34686869	-2.24046939	2.137986
100	0.68900108	-9.37225630	-6.45749471		100.00000000	0.34340000	-3.21843281	2.159403
101	0.69088489	-10.00007400	-6.90890003		101.00000000	0.34000000	-3.40002516	2.180894
11:36 02/04/2018
Test Lot:	JK-PERC
Recipe:	Recipe_YJX-LID
Cell Name:	1-2-after
Test Order:	3
Test Condition:	Light
1	-0.29996544	8.85537240	-2.65630568		1.00000000	34.34000000	304.09348822	0.000000
2	-0.29007202	8.85902400	-2.56975499		2.00000000	17.17000000	152.10944208	0.021491
3	-0.27995902	8.84325700	-2.47574956		3.00000000	11.44666667	101.22581513	0.042863
4	-0.27015120	8.86003880	-2.39355011		4.00000000	8.58500000	76.06343310	0.064256
5	-0.26000473	8.85924910	-2.30344667		5.00000000	6.86800000	60.84532282	0.085758
6	-0.24985674	8.85365010	-2.21214415		6.00000000	5.72333333	50.67239074	0.107144
7	-0.23999533	8.85227680	-2.12450509		7.00000000	4.90571429	43.42674076	0.128500
8	-0.22986299	8.85359860	-2.03511465		8.00000000	4.29250000	38.00407199	0.149871
9	-0.22000976	8.87178900	-1.95188017		9.00000000	3.81555556	33.85080381	0.171358
10	-0.20987891	8.85426140	-1.85832273		10.00000000	3.43400000	30.40553365	0.192744
11	-0.20004578	8.86468510	-1.77334285		11.00000000	3.12181818	27.67393512	0.214089
12	-0.18991716	8.85532760	-1.68177867		12.00000000	2.86166667	25.34099582	0.235467
13	-0.18013240	8.85686300	-1.59540799		13.00000000	2.64153846	23.39574426	0.256944
14	-0.16997550	8.85344980	-1.50486956		14.00000000	2.45285714	21.71624758	0.278326
15	-0.16014832	8.86728950	-1.42008152		15.00000000	2.28933333	20.30018143	0.299673
16	-0.14999217	8.83677860	-1.32544760		16.00000000	2.14625000	18.96593607	0.321052
17	-0.13986801	8.86094670	-1.23936298		17.00000000	2.02000000	17.89911233	0.342534
18	-0.13004009	8.85538100	-1.15155454		18.00000000	1.90777778	16.89409909	0.363906
19	-0.11987797	8.84908960	-1.06081090		19.00000000	1.80736842	15.99356510	0.385284
20	-0.11006643	8.85759350	-0.97492369		20.00000000	1.71700000	15.20848804	0.406623
21	-0.09989538	8.85389900	-0.88446361		21.00000000	1.63523810	14.47823294	0.428103
22	-0.09008160	8.85878370	-0.79801343		22.00000000	1.56090909	13.82775601	0.449483
23	-0.07996564	8.85289480	-0.70792736		23.00000000	1.49304348	13.21775684	0.470862
24	-0.07014740	8.84739210	-0.62062151		24.00000000	1.43083333	12.65914353	0.492353
25	-0.06000463	8.87009720	-0.53224689		25.00000000	1.37360000	12.18396551	0.513801
26	-0.04986112	8.84046460	-0.44079548		26.00000000	1.32076923	11.67621363	0.535176
27	-0.04002725	8.86044410	-0.35465918		27.00000000	1.27185185	11.26917224	0.556570
28	-0.02987109	8.84676170	-0.26426238		28.00000000	1.22642857	10.84992131	0.577910
29	-0.02006773	8.86087130	-0.17781756		29.00000000	1.18413793	10.49249381	0.599401
30	-0.00992348	8.86059280	-0.08792788		30.00000000	1.14466667	10.14242523	0.620780
31	-0.00063515	8.85485080	-0.00562412		31.00000000	1.10774194	9.80888956	0.642262
32	0.00951546	8.85904500	0.08429788		32.00000000	1.07312500	9.50686267	0.703957
33	0.01933031	8.85687350	0.17120613		33.00000000	1.04060606	9.21651624	0.725393
34	0.02946893	8.85454270	0.26093388		34.00000000	1.01000000	8.94308813	0.746768
35	0.03931058	8.85733600	0.34818697		35.00000000	0.98114286	8.69031195	0.768247
36	0.04943430	8.84903530	0.43744590		36.00000000	0.95388889	8.44099645	0.789630
37	0.05926925	8.85242460	0.52467659		37.00000000	0.92810811	8.21600705	0.811015
38	0.06946220	8.86178490	0.61555909		38.00000000	0.90368421	8.00825509	0.832362
39	0.07958147	8.85293010	0.70452918		39.00000000	0.88051282	7.79511845	0.853842
40	0.08940078	8.85113430	0.79129834		40.00000000	0.85850000	7.59869880	0.875206
41	0.09955354	8.84137150	0.88018983		41.00000000	0.83756098	7.40518774	0.896587
42	0.10935426	8.84856610	0.96762840		42.00000000	0.81761905	7.23475619	0.918074
43	0.11951297	8.85050200	1.05774978		43.00000000	0.79860465	7.06805206	0.939458
44	0.12935834	8.85152340	1.14501837		44.00000000	0.78045455	6.90821167	0.960800
45	0.13949397	8.84459590	1.23376780		45.00000000	0.76311111	6.74940940	0.982187
46	0.14930511	8.84891030	1.32118753		46.00000000	0.74652174	6.60590391	1.003680
47	0.15945637	8.84950540	1.41111001		47.00000000	0.73063830	6.46578756	1.025065
48	0.16960393	8.84931850	1.50087920		48.00000000	0.71541667	6.33094994	1.046413
49	0.17941877	8.84814740	1.58752372		49.00000000	0.70081633	6.20092616	1.067784
50	0.18954772	8.86048700	1.67948511		50.00000000	0.68680000	6.08538247	1.089271
51	0.19936258	8.83970640	1.76230667		51.00000000	0.67333333	5.95206898	1.110640
52	0.20948258	8.84650710	1.85318913		52.00000000	0.66038462	5.84209719	1.131988
53	0.21932125	8.84933570	1.94084737		53.00000000	0.64792453	5.73370166	1.153374
54	0.22944647	8.84705070	2.02992455		54.00000000	0.63592593	5.62606891	1.174855
55	0.23925015	8.85534480	2.11864257		55.00000000	0.62436364	5.52895528	1.196233
56	0.24942821	8.85132980	2.20777135		56.00000000	0.61321429	5.42776188	1.217592
57	0.25955865	8.85110470	2.29738079		57.00000000	0.60245614	5.33240238	1.238981
58	0.26936010	8.85499760	2.38518304		58.00000000	0.59206897	5.24276927	1.260455
59	0.27950618	8.85251810	2.47433352		59.00000000	0.58203390	5.15246562	1.281838
60	0.28935897	8.83969310	2.55784449		60.00000000	0.57233333	5.05925102	1.303188
61	0.29951471	8.85464380	2.65209607		61.00000000	0.56295082	4.98472899	1.324560
62	0.30933848	8.84704400	2.73673114		62.00000000	0.55387097	4.90012082	1.346046
63	0.31948084	8.84915350	2.82713499		63.00000000	0.54507937	4.82349097	1.367418
64	0.32928824	8.83964440	2.91079095		64.00000000	0.53656250	4.74302170	1.388794
65	0.33943579	8.84721470	3.00306131		65.00000000	0.52830769	4.67405158	1.410148
66	0.34923351	8.85350800	3.09194167		66.00000000	0.52030303	4.60650704	1.431622
67	0.35942349	8.84009840	3.17733902		67.00000000	0.51253731	4.53088028	1.453009
68	0.36957252	8.84810540	3.27001661		68.00000000	0.50500000	4.46829323	1.474403
69	0.37940821	8.83753490	3.35303330		69.00000000	0.49768116	4.39827462	1.495757
70	0.38955206	8.83844090	3.44303286		70.00000000	0.49057143	4.33588658	1.517230
71	0.39938030	8.84846970	3.53390448		71.00000000	0.48366197	4.27966830	1.538612
72	0.40951446	8.83521840	3.61814969		72.00000000	0.47694444	4.21390833	1.560001
73	0.41931069	8.84254840	3.70777507		73.00000000	0.47041096	4.15963167	1.581494
74	0.42946196	8.83074470	3.79246893		74.00000000	0.46405405	4.09794288	1.602863
75	0.43930435	8.84728810	3.88665215		75.00000000	0.45786667	4.05087831	1.624208
76	0.44947645	8.82324120	3.96583913		76.00000000	0.45184211	3.98671188	1.645591
77	0.45960018	8.81826780	4.05287747		77.00000000	0.44597403	3.93271839	1.667065
78	0.46947905	8.82718470	4.14417829		78.00000000	0.44025641	3.88622465	1.688457
79	0.47958642	8.79281330	4.21691385		79.00000000	0.43468354	3.82209125	1.709801
80	0.48942658	8.79662990	4.30530449		80.00000000	0.42925000	3.77595338	1.731182
81	0.49953243	8.76743320	4.37961721		81.00000000	0.42395062	3.71695872	1.752670
82	0.50939119	8.74080940	4.45249130		82.00000000	0.41878049	3.66048042	1.774055
83	0.51949930	8.68511300	4.51191012		83.00000000	0.41373494	3.59333470	1.795406
84	0.52927917	8.62022970	4.56250802		84.00000000	0.40880952	3.52403200	1.816786
85	0.53942746	8.51643660	4.59399976		85.00000000	0.40400000	3.44064039	1.838275
86	0.54955715	8.39137080	4.61153782		86.00000000	0.39930233	3.35069388	1.859642
87	0.55936754	8.17840960	4.57473686		87.00000000	0.39471264	3.22812167	1.881006
88	0.56949127	7.91689730	4.50860390		88.00000000	0.39022727	3.08938924	1.902384
89	0.57930094	7.53949070	4.36763405		89.00000000	0.38584270	2.90905742	1.923878
90	0.58940083	7.04076100	4.14983038		90.00000000	0.38155556	2.68644147	1.945282
91	0.59916580	6.40706490	3.83889417		91.00000000	0.37736264	2.41778691	1.966628
92	0.60930741	5.57421830	3.39641252		92.00000000	0.37326087	2.08063757	1.988126
93	0.61906868	4.58141040	2.83620769		93.00000000	0.36924731	1.69167347	2.009640
94	0.62922215	3.33188580	2.09649635		94.00000000	0.36531915	1.21720168	2.031017
95	0.63937867	1.84236420	1.17796837		95.00000000	0.36147368	0.66596618	2.052390
96	0.64903647	0.17821568	0.11566848		96.00000000	0.35770833	0.06374923	2.073754
97	0.65918106	-1.81486010	-1.19632140		97.00000000	0.35402062	-0.64249790	2.095222
98	0.66890210	-3.99410990	-2.67166850		98.00000000	0.35040816	-1.39956871	2.116607
99	0.67901540	-6.58844420	-4.47365507		99.00000000	0.34686869	-2.28532499	2.137990
100	0.68902528	-9.42994020	-6.49746719		100.00000000	0.34340000	-3.23824146	2.159347
101	0.69077283	-10.00006900	-6.90777596		101.00000000	0.34000000	-3.40002346	2.180857
11:36 02/04/2018
Test Lot:	JK-PERC
Recipe:	Recipe_YJX-LID
Cell Name:	1-2-after
Test Order:	4
Test Condition:	Light
1	-0.29987872	8.84078120	-2.65116215		1.00000000	34.34000000	303.59242641	0.000000
2	-0.29002711	8.84719940	-2.56592767		2.00000000	17.17000000	151.90641370	0.021600
3	-0.27989119	8.86056520	-2.47999414		3.00000000	11.44666667	101.42393632	0.042995
4	-0.27007532	8.84027190	-2.38753926		4.00000000	8.58500000	75.89373426	0.064365
5	-0.25994682	8.85225770	-2.30111624		5.00000000	6.86800000	60.79730588	0.085748
6	-0.24979006	8.84434410	-2.20922924		6.00000000	5.72333333	50.61912940	0.107249
7	-0.23998758	8.84407040	-2.12246705		7.00000000	4.90571429	43.38648251	0.128653
8	-0.22982635	8.84417060	-2.03262345		8.00000000	4.29250000	37.96360230	0.150060
9	-0.21996135	8.84411720	-1.94536396		9.00000000	3.81555556	33.74522052	0.171465
10	-0.20981425	8.84620000	-1.85605882		10.00000000	3.43400000	30.37785080	0.192963
11	-0.19999094	8.84932900	-1.76978563		11.00000000	3.12181818	27.62599617	0.214336
12	-0.18984161	8.83874990	-1.67796251		12.00000000	2.86166667	25.29355596	0.235733
13	-0.18007188	8.85297200	-1.59417131		13.00000000	2.64153846	23.38546604	0.257087
14	-0.16990618	8.84705260	-1.50316891		14.00000000	2.45285714	21.70055616	0.278566
15	-0.16009030	8.85234930	-1.41717526		15.00000000	2.28933333	20.26597833	0.299954
16	-0.14995140	8.85011960	-1.32708782		16.00000000	2.14625000	18.99456919	0.321342
17	-0.13979612	8.84604260	-1.23664243		17.00000000	2.02000000	17.86900605	0.342830
18	-0.12998843	8.85621640	-1.15120567		18.00000000	1.90777778	16.89569284	0.364297
19	-0.11983315	8.83557220	-1.05879445		19.00000000	1.80736842	15.96913418	0.385669
20	-0.11001355	8.85414890	-0.97407635		20.00000000	1.71700000	15.20257366	0.407056
21	-0.09986720	8.84428220	-0.88325372		21.00000000	1.63523810	14.46250718	0.428412
22	-0.09003123	8.84200290	-0.79605639		22.00000000	1.56090909	13.80156271	0.449906
23	-0.07989605	8.84938240	-0.70703068		23.00000000	1.49304348	13.21251268	0.471351
24	-0.07006901	8.84360790	-0.61966283		24.00000000	1.43083333	12.65372897	0.492727
25	-0.05995764	8.83531380	-0.52974455		25.00000000	1.37360000	12.13618704	0.514088
26	-0.04979938	8.85322380	-0.44088508		26.00000000	1.32076923	11.69306559	0.535557
27	-0.03998574	8.85341260	-0.35401025		27.00000000	1.27185185	11.26022921	0.556947
28	-0.02980813	8.84413050	-0.26362699		28.00000000	1.22642857	10.84669433	0.578329
29	-0.01999672	8.84616280	-0.17689422		29.00000000	1.18413793	10.47507692	0.599703
30	-0.00986451	8.84539890	-0.08725554		30.00000000	1.14466667	10.12503327	0.621187
31	-0.00062770	8.85304740	-0.00555708		31.00000000	1.10774194	9.80689186	0.642683
32	0.00952141	8.84403710	0.08420774		32.00000000	1.07312500	9.49075731	0.664079
33	0.01933478	8.83896350	0.17089940		33.00000000	1.04060606	9.19787899	0.685569
34	0.02948679	8.85003470	0.26095911		34.00000000	1.01000000	8.93853505	0.706944
35	0.03930165	8.83265880	0.34713802		35.00000000	0.98114286	8.66610009	0.728315
36	0.04946631	8.85090730	0.43782174		36.00000000	0.95388889	8.44278213	0.749699
37	0.05928116	8.84062100	0.52408229		37.00000000	0.92810811	8.20505203	0.771172
38	0.06945550	8.83207130	0.61343596		38.00000000	0.90368421	7.98140338	0.792552
39	0.07957923	8.85385510	0.70458301		39.00000000	0.88051282	7.79593293	0.813901
40	0.08940451	8.84203620	0.79051790		40.00000000	0.85850000	7.59088808	0.835284
41	0.09956098	8.84900670	0.88101581		41.00000000	0.83756098	7.41158268	0.856778
42	0.10937510	8.84832760	0.96778672		42.00000000	0.81761905	7.23456119	0.878149
43	0.11954274	8.84282680	1.05709575		43.00000000	0.79860465	7.06192261	0.899516
44	0.12936577	8.84437750	1.14415971		44.00000000	0.78045455	6.90263462	0.920905
45	0.13952225	8.83666420	1.23291127		45.00000000	0.76311111	6.74335664	0.942389
46	0.14932148	8.83844950	1.31977036		46.00000000	0.74652174	6.59809469	0.963779
47	0.15947349	8.84457780	1.41047569		47.00000000	0.73063830	6.46218727	0.985138
48	0.16962476	8.85237790	1.50158248		48.00000000	0.71541667	6.33313869	1.006519
49	0.17939794	8.84002490	1.58588226		49.00000000	0.70081633	6.19523378	1.028001
50	0.18954623	8.85436250	1.67831103		50.00000000	0.68680000	6.08117617	1.049374
51	0.19933651	8.84127140	1.76238818		51.00000000	0.67333333	5.95312274	1.070718
52	0.20949225	8.85270980	1.85457409		52.00000000	0.66038462	5.84619336	1.092093
53	0.21933241	8.84271720	1.93949447		53.00000000	0.64792453	5.72941337	1.113573
54	0.22948517	8.84658720	2.03016057		54.00000000	0.63592593	5.62577416	1.134961
55	0.23930226	8.84629630	2.11693870		55.00000000	0.62436364	5.52330573	1.156375
56	0.24946693	8.84748650	2.20715530		56.00000000	0.61321429	5.42540511	1.177740
57	0.25961223	8.83936880	2.29480825		57.00000000	0.60245614	5.32533201	1.199224
58	0.26939583	8.84313110	2.38230264		58.00000000	0.59206897	5.23574348	1.220612
59	0.27956349	8.84479430	2.47268156		59.00000000	0.58203390	5.14797011	1.241999
60	0.28937459	8.83744810	2.55733292		60.00000000	0.57233333	5.05796613	1.263354
61	0.29951024	8.83639530	2.64659088		61.00000000	0.56295082	4.97445598	1.284845
62	0.30936009	8.84309580	2.73570091		62.00000000	0.55387097	4.89793403	1.306224
63	0.31945926	8.83502480	2.82243048		63.00000000	0.54507937	4.81578971	1.327619
64	0.32926890	8.84388160	2.91201517		64.00000000	0.53656250	4.74529522	1.349104
65	0.33948714	8.84552190	3.00294093		65.00000000	0.52830769	4.67315726	1.370470
66	0.34926477	8.84130860	3.08795761		66.00000000	0.52030303	4.60015966	1.391837
67	0.35939595	8.84157560	3.17762646		67.00000000	0.51253731	4.53163740	1.413224
68	0.36956730	8.84637360	3.26933041		68.00000000	0.50500000	4.46741867	1.434705
69	0.37938291	8.83161740	3.35056471		69.00000000	0.49768116	4.39532959	1.456078
70	0.38954461	8.83472160	3.44151818		70.00000000	0.49057143	4.33406200	1.477432
71	0.39937657	8.84522820	3.53257690		71.00000000	0.48366197	4.27810051	1.498822
72	0.40952042	8.82856460	3.61547748		72.00000000	0.47694444	4.21073484	1.520305
73	0.41935834	8.84828090	3.71060039		73.00000000	0.47041096	4.16232830	1.541677
74	0.42951480	8.82053470	3.78855020		74.00000000	0.46405405	4.09320489	1.563040
75	0.43932667	8.83643340	3.88208086		75.00000000	0.45786667	4.04590831	1.584419
76	0.44949657	8.82652760	3.96749388		76.00000000	0.45184211	3.98819681	1.605907
77	0.45961508	8.82351490	4.05542051		77.00000000	0.44597403	3.93505846	1.627303
78	0.46945971	8.80288980	4.13260209		78.00000000	0.44025641	3.87552866	1.648665
79	0.47961619	8.81144050	4.22610952		79.00000000	0.43468354	3.83018819	1.670037
80	0.48941988	8.78642940	4.30025322		80.00000000	0.42925000	3.77157482	1.691525
81	0.49955255	8.75899510	4.37557834		81.00000000	0.42395062	3.71338138	1.712909
82	0.50938749	8.73090170	4.44741210		82.00000000	0.41878049	3.65633127	1.734266
83	0.51950973	8.67234990	4.50537016		83.00000000	0.41373494	3.58805416	1.755654
84	0.52931935	8.60880280	4.55680590		84.00000000	0.40880952	3.51936057	1.777139
85	0.53943938	8.50405410	4.58742167		85.00000000	0.40400000	3.43563786	1.798532
86	0.54956234	8.34892180	4.58825300		86.00000000	0.39930233	3.33374389	1.819890
87	0.55939209	8.18762490	4.58009260		87.00000000	0.39471264	3.23175907	1.841242
88	0.56949425	7.87768650	4.48629717		88.00000000	0.39022727	3.07408812	1.862715
89	0.57928377	7.51791330	4.35500516		89.00000000	0.38584270	2.90073194	1.884099
90	0.58942240	7.00221300	4.12726119		90.00000000	0.38155556	2.67173327	1.905488
91	0.59922683	6.35737470	3.80950949		91.00000000	0.37736264	2.39903568	1.926859
92	0.60928655	5.52605490	3.36695093		92.00000000	0.37326087	2.06266006	1.948336
93	0.61914384	4.51081510	2.79284338		93.00000000	0.36924731	1.66560635	1.969721
94	0.62924522	3.25049730	2.04535989		94.00000000	0.36531915	1.18746891	1.991215
95	0.63935262	1.74236730	1.11398710		95.00000000	0.36147368	0.62981993	2.012727
96	0.64909077	0.06210040	0.04030879		96.00000000	0.35770833	0.02221383	2.034115
97	0.65919667	-1.94020000	-1.27897338		97.00000000	0.35402062	-0.68687080	2.055465
98	0.66892594	-4.14189200	-2.77061900		98.00000000	0.35040816	-1.45135277	2.076847
99	0.67905784	-6.73454430	-4.57314511		99.00000000	0.34686869	-2.33600254	2.098344
100	0.68901932	-9.58864690	-6.60676297		100.00000000	0.34340000	-3.29274135	2.119723
101	0.69025928	-10.00015500	-6.90269979		101.00000000	0.34000000	-3.40005270	2.141065
