# Supplementary material for: Study on the Electrical Injection Regeneration of Industrialized B-Doped Czochralski Silicon PERC Solar Cells
Source: Hindawi journal article supplement (doi:10.1155/2019/5357370), 2019-06-20
Supplement: f1 [file 5357370.f1.zip › section3.2/IVRawData_1-2.csv]

11:25 02/04/2018
Test Lot:	JK-PERC
Recipe:	Recipe_YJX-LID
Cell Name:	1-2
Test Order:	2
Test Condition:	Light
1	-0.29986680	9.03602890	-2.70960507		1.00000000	34.34000000	310.29723243	0.000000
2	-0.29004705	9.04815960	-2.62439200		2.00000000	17.17000000	155.35690033	0.061803
3	-0.27994516	9.02373790	-2.52615175		3.00000000	11.44666667	103.29171983	0.083225
4	-0.27008447	9.03646090	-2.44060775		4.00000000	8.58500000	77.57801683	0.104713
5	-0.25993422	9.03559210	-2.34865958		5.00000000	6.86800000	62.05644654	0.126162
6	-0.24979216	9.03259470	-2.25627134		6.00000000	5.72333333	51.69655033	0.147545
7	-0.23994933	9.03693680	-2.16840693		7.00000000	4.90571429	44.33262996	0.168929
8	-0.22981024	9.01169110	-2.07097889		8.00000000	4.29250000	38.68268405	0.190426
9	-0.22000462	9.04541780	-1.99003371		9.00000000	3.81555556	34.51329414	0.211799
10	-0.20983428	9.02859780	-1.89450932		10.00000000	3.43400000	31.00420485	0.233161
11	-0.20001377	9.04882720	-1.80989004		11.00000000	3.12181818	28.24879328	0.254537
12	-0.18987840	9.02495290	-1.71364362		12.00000000	2.86166667	25.82640688	0.276018
13	-0.18008171	9.02571390	-1.62536599		13.00000000	2.64153846	23.84177041	0.297410
14	-0.16993965	9.02654840	-1.53396848		14.00000000	2.45285714	22.14083372	0.318760
15	-0.16013254	9.02884290	-1.44581155		15.00000000	2.28933333	20.67003101	0.340131
16	-0.15002026	9.03172490	-1.35494172		16.00000000	2.14625000	19.38433957	0.361607
17	-0.13985215	9.03820320	-1.26401215		17.00000000	2.02000000	18.25717046	0.382977
18	-0.13002867	9.03103730	-1.17429377		18.00000000	1.90777778	17.22921227	0.404341
19	-0.11990224	9.02628140	-1.08227136		19.00000000	1.80736842	16.31381596	0.425719
20	-0.11006014	9.03738400	-0.99465575		20.00000000	1.71700000	15.51718833	0.447194
21	-0.09990841	9.03392600	-0.90256520		21.00000000	1.63523810	14.77261994	0.468560
22	-0.09007376	9.03655430	-0.81395640		22.00000000	1.56090909	14.10523976	0.489943
23	-0.07994361	9.04128740	-0.72279311		23.00000000	1.49304348	13.49903519	0.511293
24	-0.07012831	9.03561020	-0.63365205		24.00000000	1.43083333	12.92845226	0.532771
25	-0.05998029	9.03708170	-0.54204680		25.00000000	1.37360000	12.41333542	0.554145
26	-0.04983303	9.02375980	-0.44968126		26.00000000	1.32076923	11.91830429	0.575531
27	-0.04000433	9.03889750	-0.36159502		27.00000000	1.27185185	11.49613852	0.597014
28	-0.02986823	9.03378770	-0.26982320		28.00000000	1.22642857	11.07929534	0.618387
29	-0.02003506	9.03795810	-0.18107603		29.00000000	1.18413793	10.70218901	0.639746
30	-0.00987886	9.02718930	-0.08917835		30.00000000	1.14466667	10.33312269	0.661117
31	-0.00066273	9.03178020	-0.00598567		31.00000000	1.10774194	10.00488168	0.682710
32	0.00950516	9.02645300	0.08579792		32.00000000	1.07312500	9.68651238	0.704087
33	0.01934177	9.04085830	0.17486621		33.00000000	1.04060606	9.40797194	0.725453
34	0.02946940	9.02836700	0.26606053		34.00000000	1.01000000	9.11865067	0.746828
35	0.03929856	9.02475930	0.35466004		35.00000000	0.98114286	8.85457812	0.768304
36	0.04943140	9.03184220	0.44645660		36.00000000	0.95388889	8.61537392	0.789689
37	0.05924865	9.03235440	0.53515482		37.00000000	0.92810811	8.38300135	0.811076
38	0.06939786	9.03608890	0.62708522		38.00000000	0.90368421	8.16577086	0.832477
39	0.07953740	9.03276160	0.71844236		39.00000000	0.88051282	7.95346239	0.853957
40	0.08937623	9.03243730	0.80728523		40.00000000	0.85850000	7.75434742	0.875330
41	0.09951205	9.03416630	0.89900839		41.00000000	0.83756098	7.56666514	0.896698
42	0.10934568	9.02828690	0.98720417		42.00000000	0.81761905	7.38169934	0.918080
43	0.11945916	9.03404140	1.07919900		43.00000000	0.79860465	7.21462748	0.939563
44	0.12931214	9.02555850	1.16711428		44.00000000	0.78045455	7.04403816	0.960950
45	0.13944498	9.03116800	1.25935104		45.00000000	0.76311111	6.89178465	0.982294
46	0.14926745	9.02883430	1.34771107		46.00000000	0.74652174	6.74022108	1.003669
47	0.15946950	9.01812270	1.43811552		47.00000000	0.73063830	6.58898582	1.025144
48	0.16958298	9.02751160	1.53091232		48.00000000	0.71541667	6.45843226	1.046518
49	0.17937568	9.02130990	1.61820360		49.00000000	0.70081633	6.32228126	1.067879
50	0.18950777	9.02161690	1.70966650		50.00000000	0.68680000	6.19604649	1.089244
51	0.19929004	9.03099920	1.79978819		51.00000000	0.67333333	6.08087279	1.110730
52	0.20944968	9.03032680	1.89139906		52.00000000	0.66038462	5.96348889	1.132106
53	0.21928628	9.01128860	1.97605196		53.00000000	0.64792453	5.83863492	1.153501
54	0.22942284	9.04242710	2.07453931		54.00000000	0.63592593	5.75031383	1.174840
55	0.23923488	9.02602290	2.15933951		55.00000000	0.62436364	5.63552048	1.196306
56	0.24941386	9.01912400	2.24949453		56.00000000	0.61321429	5.53065568	1.217725
57	0.25955042	9.03114410	2.34403724		57.00000000	0.60245614	5.44086822	1.239141
58	0.26937065	9.01680560	2.42886279		58.00000000	0.59206897	5.33857076	1.260628
59	0.27948043	9.02787690	2.52311492		59.00000000	0.58203390	5.25453039	1.282016
60	0.28934827	9.02643300	2.61178277		60.00000000	0.57233333	5.16612849	1.303361
61	0.29947442	9.01229480	2.69895176		61.00000000	0.56295082	5.07347874	1.324750
62	0.30928424	9.03011130	2.79287111		62.00000000	0.55387097	5.00151648	1.346228
63	0.31945056	9.02385520	2.88267560		63.00000000	0.54507937	4.91871726	1.367604
64	0.32927004	9.03742890	2.97575458		64.00000000	0.53656250	4.84914544	1.388983
65	0.33943340	9.03006940	3.06510716		65.00000000	0.52830769	4.77065513	1.410358
66	0.34925139	9.02088070	3.15055512		66.00000000	0.52030303	4.69359156	1.431841
67	0.35939762	9.03103070	3.24573094		67.00000000	0.51253731	4.62874021	1.453218
68	0.36955875	9.02691750	3.33597635		68.00000000	0.50500000	4.55859334	1.474558
69	0.37937972	9.03452400	3.42751519		69.00000000	0.49768116	4.49631238	1.495933
70	0.38954160	9.02003860	3.51368027		70.00000000	0.49057143	4.42497322	1.517418
71	0.39936703	9.04046440	3.61046342		71.00000000	0.48366197	4.37252884	1.538820
72	0.40947753	9.01472470	3.69132720		72.00000000	0.47694444	4.29952286	1.560191
73	0.41931191	9.02343270	3.78363280		73.00000000	0.47041096	4.24472163	1.581571
74	0.42944700	9.00935750	3.86904155		74.00000000	0.46405405	4.18082887	1.603054
75	0.43925232	9.02776530	3.96546685		75.00000000	0.45786667	4.13351281	1.624432
76	0.44942462	9.01043220	4.04951007		76.00000000	0.45184211	4.07129265	1.645789
77	0.45957977	9.01504520	4.14313240		77.00000000	0.44597403	4.02047600	1.667157
78	0.46944988	9.01612470	4.23261866		78.00000000	0.44025641	3.96940669	1.688650
79	0.47958273	9.00814150	4.32014909		79.00000000	0.43468354	3.91569087	1.710021
80	0.48936871	8.98725890	4.39808329		80.00000000	0.42925000	3.85778088	1.731384
81	0.49950749	8.99518590	4.49316273		81.00000000	0.42395062	3.81351461	1.752756
82	0.50933295	8.96382710	4.56557250		82.00000000	0.41878049	3.75387589	1.774238
83	0.51944345	8.94924640	4.64862742		83.00000000	0.41373494	3.70261592	1.795633
84	0.52927858	8.90293120	4.71213078		84.00000000	0.40880952	3.63960306	1.817021
85	0.53941959	8.85810180	4.77823364		85.00000000	0.40400000	3.57867313	1.838362
86	0.54954720	8.78466320	4.82758706		86.00000000	0.39930233	3.50773645	1.859834
87	0.55934733	8.69760890	4.86498432		87.00000000	0.39471264	3.43305620	1.881214
88	0.56948096	8.54085450	4.86385402		88.00000000	0.39022727	3.33287436	1.902595
89	0.57929969	8.35853290	4.84209552		89.00000000	0.38584270	3.22507887	1.924072
90	0.58941317	8.08520030	4.76552354		90.00000000	0.38155556	3.08495309	1.945453
91	0.59922445	7.69857790	4.61317611		91.00000000	0.37736264	2.90515566	1.966795
92	0.60935134	7.20945260	4.39308960		92.00000000	0.37326087	2.69100655	1.988283
93	0.61916935	6.54504680	4.05249237		93.00000000	0.36924731	2.41674094	2.009814
94	0.62925678	5.68749240	3.57889315		94.00000000	0.36531915	2.07774988	2.031195
95	0.63934642	4.55382970	2.91147472		95.00000000	0.36147368	1.64608960	2.052554
96	0.64914805	3.18767330	2.06927191		96.00000000	0.35770833	1.14025730	2.073923
97	0.65925854	1.41699550	0.93416638		97.00000000	0.35402062	0.50164562	2.095397
98	0.66901481	-0.65123141	-0.43568346		98.00000000	0.35040816	-0.22819680	2.116783
99	0.67907470	-3.23737000	-2.19841606		99.00000000	0.34686869	-1.12294228	2.138196
100	0.68878251	-6.25253150	-4.30663434		100.00000000	0.34340000	-2.14711932	2.159603
101	0.69896150	-9.92136000	-6.93464867		101.00000000	0.34000000	-3.37326240	2.181092
11:25 02/04/2018
Test Lot:	JK-PERC
Recipe:	Recipe_YJX-LID
Cell Name:	1-2
Test Order:	3
Test Condition:	Light
1	-0.29989508	9.02038670	-2.70516959		1.00000000	34.34000000	309.76007928	0.000000
2	-0.29005596	9.02820400	-2.61868438		2.00000000	17.17000000	155.01426268	0.021589
3	-0.27991390	9.02667710	-2.52669239		3.00000000	11.44666667	103.32536387	0.042979
4	-0.27012688	9.03761960	-2.44130399		4.00000000	8.58500000	77.58796427	0.064415
5	-0.25995952	9.01736450	-2.34414975		5.00000000	6.86800000	61.93125939	0.085815
6	-0.24982566	9.03715230	-2.25771254		6.00000000	5.72333333	51.72263500	0.107305
7	-0.23999994	9.02040390	-2.16489639		7.00000000	4.90571429	44.25152428	0.128681
8	-0.22985788	9.02393340	-2.07422220		8.00000000	4.29250000	38.73523412	0.150024
9	-0.21999569	9.02720450	-1.98594608		9.00000000	3.81555556	34.44380028	0.171388
10	-0.20987968	9.02867410	-1.89493523		10.00000000	3.43400000	31.00446686	0.192866
11	-0.20003311	9.01326750	-1.80295193		11.00000000	3.12181818	28.13778236	0.214230
12	-0.18989033	9.03254600	-1.71519314		12.00000000	2.86166667	25.84813580	0.235630
13	-0.18009214	9.02974410	-1.62618594		13.00000000	2.64153846	23.85241634	0.256993
14	-0.16995975	9.02115150	-1.53323265		14.00000000	2.45285714	22.12759589	0.278467
15	-0.16011691	9.01326750	-1.44317654		15.00000000	2.28933333	20.63437373	0.299867
16	-0.15000017	9.03346060	-1.35502063		16.00000000	2.14625000	19.38806481	0.321257
17	-0.13983354	9.02686880	-1.26225902		17.00000000	2.02000000	18.23427498	0.342599
18	-0.13001303	9.02267650	-1.17306551		18.00000000	1.90777778	17.21326172	0.364071
19	-0.11988363	9.02490810	-1.08193874		19.00000000	1.80736842	16.31133390	0.385441
20	-0.11002888	9.03772930	-0.99441123		20.00000000	1.71700000	15.51778121	0.406825
21	-0.09986971	9.02633480	-0.90145740		21.00000000	1.63523810	14.76020653	0.428300
22	-0.09007003	9.01905350	-0.81234644		22.00000000	1.56090909	14.07792260	0.449759
23	-0.07993616	9.03069400	-0.72187902		23.00000000	1.49304348	13.48321878	0.471145
24	-0.07009406	9.03259470	-0.63313127		24.00000000	1.43083333	12.92413758	0.492525
25	-0.05996839	9.02409170	-0.54116021		25.00000000	1.37360000	12.39549236	0.513863
26	-0.04980623	9.01869490	-0.44918719		26.00000000	1.32076923	11.91161473	0.535363
27	-0.03999465	9.02484610	-0.36094556		27.00000000	1.27185185	11.47826722	0.556740
28	-0.02985706	9.01212500	-0.26907556		28.00000000	1.22642857	11.05272759	0.578144
29	-0.02003059	9.02224250	-0.18072087		29.00000000	1.18413793	10.68357957	0.599520
30	-0.00991757	9.01695440	-0.08942624		30.00000000	1.14466667	10.32140714	0.621001
31	-0.00067018	9.01926230	-0.00604451		31.00000000	1.10774194	9.99101508	0.642488
32	0.00949028	9.03224560	0.08571854		32.00000000	1.07312500	9.69272856	0.663875
33	0.01929116	9.02315900	0.17406719		33.00000000	1.04060606	9.38955394	0.685250
34	0.02943070	9.01784230	0.26540137		34.00000000	1.01000000	9.10802072	0.706720
35	0.03928219	9.03788660	0.35502796		35.00000000	0.98114286	8.86745788	0.728094
36	0.04942098	9.01546570	0.44555310		36.00000000	0.95388889	8.59975256	0.749475
37	0.05923823	9.04124260	0.53558724		37.00000000	0.92810811	8.39125056	0.770967
38	0.06937107	9.01983170	0.62571535		38.00000000	0.90368421	8.15107949	0.792354
39	0.07950985	9.02564240	0.71762751		39.00000000	0.88051282	7.94719385	0.813712
40	0.08934498	9.01953790	0.80585042		40.00000000	0.85850000	7.74327329	0.835099
41	0.09948675	9.03128810	0.89849347		41.00000000	0.83756098	7.56425447	0.856578
42	0.10932484	9.02992440	0.98719504		42.00000000	0.81761905	7.38303819	0.877955
43	0.11946587	9.02193070	1.07781280		43.00000000	0.79860465	7.20495582	0.899316
44	0.12926376	9.02098080	1.16608590		44.00000000	0.78045455	7.04046547	0.920689
45	0.13946061	9.02916340	1.25921264		45.00000000	0.76311111	6.89025491	0.942174
46	0.14927563	9.01483150	1.34569465		46.00000000	0.74652174	6.72976769	0.963562
47	0.15942335	9.03007320	1.43960452		47.00000000	0.73063830	6.59771731	0.984910
48	0.16957852	9.02276330	1.53006685		48.00000000	0.71541667	6.45503524	1.006286
49	0.17941438	9.02257160	1.61877909		49.00000000	0.70081633	6.32316548	1.027761
50	0.18954796	9.02090450	1.70989405		50.00000000	0.68680000	6.19555721	1.049147
51	0.19934587	9.01594830	1.79729206		51.00000000	0.67333333	6.07073852	1.070512
52	0.20947796	9.02707580	1.89097342		52.00000000	0.66038462	5.96134198	1.091890
53	0.21927884	9.02483270	1.97895485		53.00000000	0.64792453	5.84741047	1.113368
54	0.22945410	9.01870160	2.06937806		54.00000000	0.63592593	5.73522617	1.134755
55	0.23926391	9.02414510	2.15915224		55.00000000	0.62436364	5.63434805	1.156107
56	0.24941684	9.02219580	2.25028757		56.00000000	0.61321429	5.53253935	1.177475
57	0.25954148	9.02184200	2.34154223		57.00000000	0.60245614	5.43526411	1.198964
58	0.26936841	9.02339080	2.43061643		58.00000000	0.59206897	5.34246966	1.220336
59	0.27952731	9.02187540	2.52186056		59.00000000	0.58203390	5.25103731	1.241778
60	0.28934753	9.02534870	2.61146235		60.00000000	0.57233333	5.16550791	1.263162
61	0.29947591	9.02259160	2.70204883		61.00000000	0.56295082	5.07927534	1.284647
62	0.30928200	9.01788710	2.78907016		62.00000000	0.55387097	4.99474586	1.306031
63	0.31941706	9.03312490	2.88533420		63.00000000	0.54507937	4.92376999	1.327432
64	0.32925591	9.02378850	2.97113569		64.00000000	0.53656250	4.84182652	1.348774
65	0.33940586	9.01498320	3.05973813		65.00000000	0.52830769	4.76268497	1.370248
66	0.34923130	9.01638320	3.14880323		66.00000000	0.52030303	4.69125150	1.391620
67	0.35938871	9.02381990	3.24305899		67.00000000	0.51253731	4.62504441	1.413003
68	0.36956769	9.01988320	3.33345740		68.00000000	0.50500000	4.55504102	1.434501
69	0.37938493	9.02452560	3.42376901		69.00000000	0.49768116	4.49133636	1.455879
70	0.38951704	9.01414590	3.51116343		70.00000000	0.49057143	4.42208243	1.477229
71	0.39930898	9.03731730	3.60868195		71.00000000	0.48366197	4.37100671	1.498622
72	0.40947306	9.00743010	3.68829997		72.00000000	0.47694444	4.29604374	1.520099
73	0.41931266	9.02715590	3.78520075		73.00000000	0.47041096	4.24647306	1.541480
74	0.42942241	9.01641370	3.87185010		74.00000000	0.46405405	4.18410333	1.562850
75	0.43925381	9.00326160	3.95471696		75.00000000	0.45786667	4.12229338	1.584228
76	0.44943726	9.01704120	4.05259429		76.00000000	0.45184211	4.07427888	1.605710
77	0.45952469	9.02478120	4.14710978		77.00000000	0.44597403	4.02481801	1.627100
78	0.46943501	8.98547360	4.21809589		78.00000000	0.44025641	3.95591235	1.648441
79	0.47958791	8.99760910	4.31514454		79.00000000	0.43468354	3.91111261	1.669820
80	0.48940891	8.99674990	4.40308956		80.00000000	0.42925000	3.86185489	1.691293
81	0.49950898	8.97351260	4.48235013		81.00000000	0.42395062	3.80432621	1.712663
82	0.50934488	8.96041300	4.56394048		82.00000000	0.41878049	3.75244613	1.734013
83	0.51949406	8.93112660	4.63966722		83.00000000	0.41373494	3.69511913	1.755386
84	0.52928376	8.90165330	4.71150053		84.00000000	0.40880952	3.63908065	1.776869
85	0.53942704	8.83633520	4.76655814		85.00000000	0.40400000	3.56987942	1.798262
86	0.54954946	8.77783780	4.82385602		86.00000000	0.39930233	3.50501105	1.819609
87	0.55938756	8.66345310	4.84622789		87.00000000	0.39471264	3.41957448	1.840977
88	0.56951517	8.52434640	4.85474459		88.00000000	0.39022727	3.32643245	1.862451
89	0.57934803	8.32737450	4.82444801		89.00000000	0.38584270	3.21305663	1.883832
90	0.58945930	8.04508880	4.74225241		90.00000000	0.38155556	3.06964833	1.905204
91	0.59924084	7.66283560	4.59188404		91.00000000	0.37736264	2.89166785	1.926566
92	0.60934836	7.16481070	4.36586565		92.00000000	0.37326087	2.67434347	1.948042
93	0.61913806	6.48064570	4.01241441		93.00000000	0.36924731	2.39296100	1.969431
94	0.62927091	5.61530640	3.53354897		94.00000000	0.36531915	2.05137896	1.990912
95	0.63936877	4.46921490	2.85747643		95.00000000	0.36147368	1.61550358	2.012297
96	0.64917260	3.11341790	2.02114559		96.00000000	0.35770833	1.11369553	2.033785
97	0.65928835	1.36247930	0.89826673		97.00000000	0.35402062	0.48234576	2.055229
98	0.66898948	-0.68295157	-0.45688742		98.00000000	0.35040816	-0.23931181	2.076636
99	0.67906874	-3.19285630	-2.16816890		99.00000000	0.34686869	-1.10750187	2.098152
100	0.68882722	-6.12446930	-4.21870116		100.00000000	0.34340000	-2.10314276	2.119535
101	0.69914013	-9.71581360	-6.79271518		101.00000000	0.34000000	-3.30337662	2.140879
11:26 02/04/2018
Test Lot:	JK-PERC
Recipe:	Recipe_YJX-LID
Cell Name:	1-2
Test Order:	4
Test Condition:	Light
1	-0.29985988	9.00897880	-2.70143130		1.00000000	34.34000000	309.36833199	0.000000
2	-0.29004759	9.01525020	-2.61485159		2.00000000	17.17000000	154.79184593	0.061781
3	-0.27989137	9.02409840	-2.52576726		3.00000000	11.44666667	103.29584635	0.083200
4	-0.27008206	9.01477620	-2.43472933		4.00000000	8.58500000	77.39185368	0.104704
5	-0.25991097	9.03148840	-2.34738291		5.00000000	6.86800000	62.02826233	0.126091
6	-0.24976297	9.02373120	-2.25379390		6.00000000	5.72333333	51.64582157	0.147437
7	-0.23993205	9.02929210	-2.16641656		7.00000000	4.90571429	44.29512724	0.168809
8	-0.22980934	9.02128310	-2.07317512		8.00000000	4.29250000	38.72385771	0.190298
9	-0.21999405	9.02450940	-1.98533837		9.00000000	3.81555556	34.43351698	0.211681
10	-0.20989069	9.00870700	-1.89084373		10.00000000	3.43400000	30.93589984	0.233096
11	-0.20001660	9.03328700	-1.80680735		11.00000000	3.12181818	28.20027960	0.254478
12	-0.18990359	9.01839450	-1.71262549		12.00000000	2.86166667	25.80763893	0.275964
13	-0.18008681	9.01104830	-1.62277094		13.00000000	2.64153846	23.80303066	0.297356
14	-0.16996560	9.03120140	-1.53499356		14.00000000	2.45285714	22.15224686	0.318741
15	-0.16012797	9.02545550	-1.44522787		15.00000000	2.28933333	20.66227612	0.340081
16	-0.15000154	9.01908680	-1.35287691		16.00000000	2.14625000	19.35721504	0.361562
17	-0.13984461	9.02217100	-1.26170198		17.00000000	2.02000000	18.22478542	0.382936
18	-0.13002113	9.03070350	-1.17418227		18.00000000	1.90777778	17.22857546	0.404311
19	-0.11986494	9.02276990	-1.08151377		19.00000000	1.80736842	16.30746939	0.425798
20	-0.11007197	9.02521710	-0.99342343		20.00000000	1.71700000	15.49629776	0.447167
21	-0.09989420	9.02992630	-0.90203723		21.00000000	1.63523810	14.76607948	0.468518
22	-0.09007518	9.02375510	-0.81281636		22.00000000	1.56090909	14.08526137	0.489904
23	-0.07993462	9.01311110	-0.72045960		23.00000000	1.49304348	13.45696675	0.511385
24	-0.07010518	9.03453060	-0.63336739		24.00000000	1.43083333	12.92690753	0.532814
25	-0.05994825	9.01820950	-0.54062585		25.00000000	1.37360000	12.38741257	0.554177
26	-0.04979131	9.02896690	-0.44956409		26.00000000	1.32076923	11.92518167	0.575548
27	-0.03996931	9.01865010	-0.36046926		27.00000000	1.27185185	11.47038683	0.597026
28	-0.02982950	9.01664920	-0.26896212		28.00000000	1.22642857	11.05827620	0.618406
29	-0.02000081	9.02802180	-0.18056771		29.00000000	1.18413793	10.69042306	0.639755
30	-0.00984238	9.02853110	-0.08886225		30.00000000	1.14466667	10.33465860	0.661139
31	-0.00060542	9.02450560	-0.00546362		31.00000000	1.10774194	9.99682330	0.682736
32	0.00951409	9.01979450	0.08581515		32.00000000	1.07312500	9.67936697	0.704109
33	0.01933060	9.02689550	0.17449526		33.00000000	1.04060606	9.39344217	0.725475
34	0.02948947	9.02136990	0.26603545		34.00000000	1.01000000	9.11158360	0.746863
35	0.03931566	9.02751830	0.35492280		35.00000000	0.98114286	8.85728510	0.768342
36	0.04944774	9.01923560	0.44598080		36.00000000	0.95388889	8.60334863	0.789733
37	0.05928360	9.02911850	0.53527861		37.00000000	0.92810811	8.37999809	0.811089
38	0.06941940	9.01275730	0.62566020		38.00000000	0.90368421	8.14468647	0.832463
39	0.07954925	9.02215580	0.71770575		39.00000000	0.88051282	7.94412385	0.853989
40	0.08938957	9.01138400	0.80552374		40.00000000	0.85850000	7.73627316	0.875367
41	0.09952836	9.02053550	0.89779908		41.00000000	0.83756098	7.55524851	0.896744
42	0.10933667	9.01876830	0.98608209		42.00000000	0.81761905	7.37391675	0.918117
43	0.11951192	9.01855470	1.07782479		43.00000000	0.79860465	7.20225973	0.939592
44	0.12932099	9.02112480	1.16662079		44.00000000	0.78045455	7.04057786	0.960980
45	0.13946126	9.00778100	1.25623649		45.00000000	0.76311111	6.87393777	0.982377
46	0.14926809	9.03598590	1.34878436		46.00000000	0.74652174	6.74555991	1.003737
47	0.15942474	9.01866150	1.43779776		47.00000000	0.73063830	6.58937949	1.025222
48	0.16955236	9.01398090	1.52834173		48.00000000	0.71541667	6.44875217	1.046591
49	0.17939490	9.03626920	1.62106061		49.00000000	0.70081633	6.33276499	1.067968
50	0.18952104	9.01297950	1.70814925		50.00000000	0.68680000	6.19011432	1.089468
51	0.19930851	9.02745150	1.79924791		51.00000000	0.67333333	6.07848401	1.110852
52	0.20947112	9.02384190	1.89023427		52.00000000	0.66038462	5.95920636	1.132197
53	0.21930176	9.02548410	1.97930455		53.00000000	0.64792453	5.84783253	1.153576
54	0.22942789	9.02496150	2.07057787		54.00000000	0.63592593	5.73920700	1.175042
55	0.23925556	9.02282050	2.15875997		55.00000000	0.62436364	5.63352102	1.196429
56	0.24941890	9.02558710	2.25115201		56.00000000	0.61321429	5.53461895	1.217779
57	0.25955844	9.02088450	2.34144671		57.00000000	0.60245614	5.43468726	1.239154
58	0.26938686	9.01927090	2.42967307		58.00000000	0.59206897	5.34003039	1.260630
59	0.27955541	9.02229310	2.52223085		59.00000000	0.58203390	5.25128042	1.281999
60	0.28938901	9.02489470	2.61170534		60.00000000	0.57233333	5.16524807	1.303344
61	0.29950920	9.02481460	2.70301500		61.00000000	0.56295082	5.08052678	1.324722
62	0.30934060	9.01481150	2.78864720		62.00000000	0.55387097	4.99304237	1.346205
63	0.31948903	9.00913910	2.87832111		63.00000000	0.54507937	4.91069582	1.367587
64	0.32931969	9.02215100	2.97117197		64.00000000	0.53656250	4.84094790	1.388949
65	0.33944508	9.01351640	3.05959380		65.00000000	0.52830769	4.76191005	1.410331
66	0.34929508	9.02837940	3.15356850		66.00000000	0.52030303	4.69749316	1.431818
67	0.35942566	9.02607440	3.24420275		67.00000000	0.51253731	4.62619992	1.453203
68	0.36956966	9.01245210	3.33072886		68.00000000	0.50500000	4.55128831	1.474558
69	0.37940702	9.02620320	3.42460486		69.00000000	0.49768116	4.49217127	1.495941
70	0.38953611	8.99507900	3.50390808		70.00000000	0.49057143	4.41272876	1.517434
71	0.39936379	9.03925130	3.60994966		71.00000000	0.48366197	4.37194211	1.538808
72	0.40950108	9.01004890	3.68962476		72.00000000	0.47694444	4.29729277	1.560177
73	0.41930270	9.01857660	3.78151352		73.00000000	0.47041096	4.24243727	1.581550
74	0.42947572	9.01257040	3.87068016		74.00000000	0.46405405	4.18231983	1.603017
75	0.43930042	9.01202300	3.95898549		75.00000000	0.45786667	4.12630493	1.624419
76	0.44946525	9.01597500	4.05236746		76.00000000	0.45184211	4.07379713	1.645802
77	0.45961148	8.99568370	4.13451950		77.00000000	0.44597403	4.01184128	1.667155
78	0.46947187	9.01237680	4.23105739		78.00000000	0.44025641	3.96775666	1.688627
79	0.47960025	8.99913310	4.31598648		79.00000000	0.43468354	3.91177507	1.710005
80	0.48936689	8.99160960	4.40019603		80.00000000	0.42925000	3.85964842	1.731399
81	0.49952427	8.96803570	4.47975149		81.00000000	0.42395062	3.80200427	1.752889
82	0.50933927	8.95424650	4.56074938		82.00000000	0.41878049	3.74986372	1.774272
83	0.51949072	8.92940240	4.63874168		83.00000000	0.41373494	3.69440576	1.795625
84	0.52926779	8.89554210	4.70812391		84.00000000	0.40880952	3.63658233	1.817001
85	0.53941101	8.84420390	4.77066096		85.00000000	0.40400000	3.57305838	1.838480
86	0.54957736	8.76616290	4.81768466		86.00000000	0.39930233	3.50034923	1.859880
87	0.55937821	8.67059900	4.85014415		87.00000000	0.39471264	3.42239505	1.881225
88	0.56952596	8.51261430	4.84815483		88.00000000	0.39022727	3.32185426	1.902595
89	0.57931936	8.32114600	4.82060098		89.00000000	0.38584270	3.21065341	1.924085
90	0.58945143	8.02675630	4.73138298		90.00000000	0.38155556	3.06265346	1.945468
91	0.59927022	7.66090920	4.59095474		91.00000000	0.37736264	2.89094090	1.966818
92	0.60937995	7.12613870	4.34252604		92.00000000	0.37326087	2.65990873	1.988303
93	0.61920244	6.46040060	4.00029581		93.00000000	0.36924731	2.38548555	2.009812
94	0.62928987	5.58381890	3.51384067		94.00000000	0.36531915	2.03987597	2.031194
95	0.63940406	4.43982270	2.83884066		95.00000000	0.36147368	1.60487907	2.052562
96	0.64916176	3.07852980	1.99846382		96.00000000	0.35770833	1.10121576	2.073935
97	0.65931022	1.33444700	0.87981455		97.00000000	0.35402062	0.47242175	2.095412
98	0.66900688	-0.70165282	-0.46941056		98.00000000	0.35040816	-0.24586488	2.116805
99	0.67907572	-3.21217660	-2.18131114		99.00000000	0.34686869	-1.11420348	2.138150
100	0.68875897	-6.11565880	-4.21221486		100.00000000	0.34340000	-2.10011723	2.159531
101	0.69910169	-9.65702340	-6.75124138		101.00000000	0.34000000	-3.28338796	2.181013
