# Supplementary material for: Study on the Electrical Injection Regeneration of Industrialized B-Doped Czochralski Silicon PERC Solar Cells
Source: Hindawi journal article supplement (doi:10.1155/2019/5357370), 2019-06-20
Supplement: f1 [file 5357370.f1.zip › section3.2/IVRawData_1-5-1.5h.csv]

15:04 02/04/2018
Test Lot:	JK-PERC
Recipe:	Recipe_YJX-LID
Cell Name:	1-5-1.5h
Test Order:	2
Test Condition:	Light
1	-0.29996657	8.85750580	-2.65695563		1.00000000	34.34000000	304.16674917	0.000000
2	-0.29013976	8.86985400	-2.57349731		2.00000000	17.17000000	152.29539318	0.061722
3	-0.28000110	8.85949330	-2.48066787		3.00000000	11.44666667	101.41166664	0.083257
4	-0.27017280	8.85327050	-2.39191288		4.00000000	8.58500000	76.00532724	0.104644
5	-0.26002374	8.85853580	-2.30342961		5.00000000	6.86800000	60.84042387	0.125997
6	-0.24984266	8.85484220	-2.21231733		6.00000000	5.72333333	50.67921352	0.147378
7	-0.24003521	8.85259440	-2.12493436		7.00000000	4.90571429	43.42829881	0.168856
8	-0.22989656	8.85783290	-2.03638531		8.00000000	4.29250000	38.02224772	0.190252
9	-0.22006083	8.86038780	-1.94982429		9.00000000	3.81555556	33.80730189	0.211600
10	-0.20990357	8.86144450	-1.86004884		10.00000000	3.43400000	30.43020041	0.233027
11	-0.20009239	8.86087700	-1.77299406		11.00000000	3.12181818	27.66204693	0.254513
12	-0.18994406	8.86121370	-1.68313491		12.00000000	2.86166667	25.35783987	0.275887
13	-0.18017681	8.85109900	-1.59476278		13.00000000	2.64153846	23.38051844	0.297237
14	-0.17001879	8.85771750	-1.50597841		14.00000000	2.45285714	21.72671564	0.318619
15	-0.16018382	8.86305140	-1.41971743		15.00000000	2.28933333	20.29047901	0.340107
16	-0.15003325	8.85914800	-1.32916677		16.00000000	2.14625000	19.01394640	0.361481
17	-0.13991693	8.85838030	-1.23943738		17.00000000	2.02000000	17.89392821	0.382843
18	-0.13013627	8.85718540	-1.15264107		18.00000000	1.90777778	16.89754148	0.404226
19	-0.11996933	8.86798290	-1.06388597		19.00000000	1.80736842	16.02771225	0.425701
20	-0.11014029	8.86044980	-0.97589251		20.00000000	1.71700000	15.21339231	0.447097
21	-0.09999494	8.85519120	-0.88547434		21.00000000	1.63523810	14.48034599	0.468476
22	-0.09015326	8.86377430	-0.79909810		22.00000000	1.56090909	13.83554588	0.489824
23	-0.08003321	8.86170960	-0.70923102		23.00000000	1.49304348	13.23091772	0.511312
24	-0.07019524	8.86929130	-0.62258206		24.00000000	1.43083333	12.69047764	0.532682
25	-0.06003798	8.85841370	-0.53184128		25.00000000	1.37360000	12.16791706	0.554072
26	-0.04990082	8.84274960	-0.44126041		26.00000000	1.32076923	11.67923159	0.575488
27	-0.04005839	8.87276080	-0.35542848		27.00000000	1.27185185	11.28483725	0.596949
28	-0.02990782	8.84580900	-0.26455887		28.00000000	1.22642857	10.84875290	0.618331
29	-0.02012344	8.86229040	-0.17833980		29.00000000	1.18413793	10.49417422	0.639689
30	-0.00993418	8.86196140	-0.08803630		30.00000000	1.14466667	10.14399182	0.661049
31	-0.00068345	8.86035250	-0.00605565		31.00000000	1.10774194	9.81498403	0.682639
32	0.00943415	8.85981560	0.08358487		32.00000000	1.07312500	9.50768962	0.704016
33	0.01927035	8.86671450	0.17086468		33.00000000	1.04060606	9.22675685	0.725381
34	0.02943105	8.85552790	0.26062744		34.00000000	1.01000000	8.94408318	0.746758
35	0.03924491	8.85008430	0.34732079		35.00000000	0.98114286	8.68319700	0.768247
36	0.04941082	8.86990360	0.43826917		36.00000000	0.95388889	8.46090249	0.789634
37	0.05923585	8.85615250	0.52460170		37.00000000	0.92810811	8.21946694	0.811013
38	0.06935412	8.84887790	0.61370611		38.00000000	0.90368421	7.99659124	0.832376
39	0.07951853	8.85876270	0.70443582		39.00000000	0.88051282	7.80025413	0.853845
40	0.08936515	8.86474700	0.79219942		40.00000000	0.85850000	7.61038530	0.875222
41	0.09947746	8.84989740	0.88036533		41.00000000	0.83756098	7.41232870	0.896603
42	0.10932185	8.86536790	0.96917842		42.00000000	0.81761905	7.24849366	0.918094
43	0.11943119	8.84654620	1.05655354		43.00000000	0.79860465	7.06489294	0.939475
44	0.12928972	8.85728740	1.14515621		44.00000000	0.78045455	6.91271021	0.960831
45	0.13941988	8.85566810	1.23465618		45.00000000	0.76311111	6.75785872	0.982239
46	0.14924939	8.86046980	1.32241971		46.00000000	0.74652174	6.61453332	1.003718
47	0.15942051	8.85856910	1.41223760		47.00000000	0.73063830	6.47240985	1.025101
48	0.16952686	8.86080650	1.50214470		48.00000000	0.71541667	6.33916865	1.046457
49	0.17934148	8.85204700	1.58753921		49.00000000	0.70081633	6.20365906	1.067833
50	0.18951111	8.85957340	1.67898759		50.00000000	0.68680000	6.08475501	1.089367
51	0.19930041	8.85419940	1.76464557		51.00000000	0.67333333	5.96182760	1.110737
52	0.20942985	8.85937500	1.85541758		52.00000000	0.66038462	5.85059495	1.132089
53	0.21921915	8.85836510	1.94192327		53.00000000	0.64792453	5.73955203	1.153464
54	0.22936794	8.86321160	2.03293659		54.00000000	0.63592593	5.63634604	1.174946
55	0.23923837	8.85896970	2.11940547		55.00000000	0.62436364	5.53121854	1.196325
56	0.24936482	8.85072710	2.20705997		56.00000000	0.61321429	5.42739230	1.217691
57	0.25950244	8.85595700	2.29814245		57.00000000	0.60245614	5.33532567	1.239082
58	0.26934236	8.85988040	2.38634110		58.00000000	0.59206897	5.24566022	1.260565
59	0.27947551	8.85133460	2.47373125		59.00000000	0.58203390	5.15177678	1.281949
60	0.28931171	8.85890770	2.56298574		60.00000000	0.57233333	5.07024817	1.303299
61	0.29944339	8.85396960	2.65126267		61.00000000	0.56295082	4.98434944	1.324677
62	0.30925575	8.85055350	2.73708456		62.00000000	0.55387097	4.90206463	1.346157
63	0.31940976	8.85357570	2.82791849		63.00000000	0.54507937	4.82590142	1.367533
64	0.32923701	8.84724240	2.91283963		64.00000000	0.53656250	4.74709850	1.388891
65	0.33940366	8.84903620	3.00339527		65.00000000	0.52830769	4.67501389	1.410265
66	0.34922200	8.86115550	3.09451045		66.00000000	0.52030303	4.61048606	1.431742
67	0.35938343	8.84690380	3.17943063		67.00000000	0.51253731	4.53436831	1.453180
68	0.36952105	8.85424610	3.27183032		68.00000000	0.50500000	4.47139428	1.474570
69	0.37934536	8.84648610	3.35587345		69.00000000	0.49768116	4.40272946	1.495909
70	0.38948819	8.84928130	3.44669056		70.00000000	0.49057143	4.34120457	1.517378
71	0.39931843	8.85123730	3.53446218		71.00000000	0.48366197	4.28100689	1.538756
72	0.40947911	8.84359260	3.62126643		72.00000000	0.47694444	4.21790236	1.560137
73	0.41930342	8.84494780	3.70871686		73.00000000	0.47041096	4.16076038	1.581625
74	0.42942166	8.83725550	3.79490893		74.00000000	0.46405405	4.10096424	1.602991
75	0.43925267	8.84054660	3.88323370		75.00000000	0.45786667	4.04779160	1.624368
76	0.44942006	8.82728580	3.96715931		76.00000000	0.45184211	3.98853940	1.645743
77	0.45953387	8.82025340	4.05320518		77.00000000	0.44597403	3.93360392	1.667219
78	0.46941397	8.81605630	4.13837999		78.00000000	0.44025641	3.88132530	1.688597
79	0.47952256	8.81654170	4.22773065		79.00000000	0.43468354	3.83240559	1.709962
80	0.48936546	8.78844170	4.30075982		80.00000000	0.42925000	3.77243860	1.731343
81	0.49948820	8.78788570	4.38944521		81.00000000	0.42395062	3.72562957	1.752806
82	0.50928348	8.72788810	4.44496922		82.00000000	0.41878049	3.65506924	1.774181
83	0.51943821	8.71111300	4.52488494		83.00000000	0.41373494	3.60409181	1.795530
84	0.52924091	8.63981720	4.57254472		84.00000000	0.40880952	3.53203956	1.816907
85	0.53935170	8.56250190	4.61819996		85.00000000	0.40400000	3.45925077	1.838394
86	0.54949826	8.41920280	4.62633729		86.00000000	0.39930233	3.36180726	1.859759
87	0.55930841	8.26109310	4.62049885		87.00000000	0.39471264	3.26075790	1.881114
88	0.56943935	8.01595120	4.56459804		88.00000000	0.39022727	3.12804278	1.902481
89	0.57923985	7.69588950	4.45776588		89.00000000	0.38584270	2.96940276	1.923964
90	0.58934247	7.24312110	4.26867888		90.00000000	0.38155556	2.76365310	1.945361
91	0.59915930	6.67341760	3.99844022		91.00000000	0.37736264	2.51829847	1.966716
92	0.60926569	5.91436720	3.60342101		92.00000000	0.37326087	2.20760184	1.988202
93	0.61908549	4.97124670	3.07762670		93.00000000	0.36924731	1.83561948	2.009712
94	0.62918961	3.78670260	2.38255393		94.00000000	0.36531915	1.38335497	2.031105
95	0.63930941	2.33588360	1.49335237		95.00000000	0.36147368	0.84436045	2.052486
96	0.64906520	0.68333626	0.44352979		96.00000000	0.35770833	0.24443507	2.073859
97	0.65914476	-1.33569090	-0.88041366		97.00000000	0.35402062	-0.47286212	2.095347
98	0.66889912	-3.58108070	-2.39538173		98.00000000	0.35040816	-1.25483991	2.116738
99	0.67899054	-6.32046990	-4.29153927		99.00000000	0.34686869	-2.19237309	2.138127
100	0.68895626	-9.37583830	-6.45954249		100.00000000	0.34340000	-3.21966287	2.159470
101	0.69069558	-9.99999240	-6.90695055		101.00000000	0.34000000	-3.39999742	2.180932
15:04 02/04/2018
Test Lot:	JK-PERC
Recipe:	Recipe_YJX-LID
Cell Name:	1-5-1.5h
Test Order:	3
Test Condition:	Light
1	-0.29996479	8.86584470	-2.65944124		1.00000000	34.34000000	304.45310700	0.000000
2	-0.29010093	8.86084460	-2.57053926		2.00000000	17.17000000	152.14070178	0.061738
3	-0.27997956	8.85169220	-2.47829289		3.00000000	11.44666667	101.32237005	0.083281
4	-0.27019086	8.86475850	-2.39517672		4.00000000	8.58500000	76.10395172	0.104665
5	-0.25997198	8.85346510	-2.30165285		5.00000000	6.86800000	60.80559831	0.126013
6	-0.24984838	8.85549260	-2.21253048		6.00000000	5.72333333	50.68293598	0.147399
7	-0.24000089	8.84345820	-2.12243784		7.00000000	4.90571429	43.38347923	0.168885
8	-0.22986016	8.86531730	-2.03778325		8.00000000	4.29250000	38.05437451	0.190270
9	-0.22004840	8.85362820	-1.94822672		9.00000000	3.81555556	33.78151027	0.211625
10	-0.20989056	8.85937790	-1.85949979		10.00000000	3.43400000	30.42310371	0.233004
11	-0.20006168	8.85478500	-1.77150316		11.00000000	3.12181818	27.64302881	0.254481
12	-0.18993285	8.85541530	-1.68193427		12.00000000	2.86166667	25.34124678	0.275867
13	-0.18016054	8.85313800	-1.59498612		13.00000000	2.64153846	23.38590453	0.297223
14	-0.17000864	8.85493370	-1.50541524		14.00000000	2.45285714	21.71988738	0.318601
15	-0.16019689	8.85286710	-1.41820178		15.00000000	2.28933333	20.26716375	0.340083
16	-0.15001447	8.85746000	-1.32874717		16.00000000	2.14625000	19.01032353	0.361463
17	-0.13986631	8.85578630	-1.23862615		17.00000000	2.02000000	17.88868833	0.382826
18	-0.13005753	8.86890510	-1.15346789		18.00000000	1.90777778	16.91990006	0.404202
19	-0.11991010	8.85890010	-1.06227160		19.00000000	1.80736842	16.01129629	0.425689
20	-0.11010801	8.85723780	-0.97525283		20.00000000	1.71700000	15.20787730	0.447071
21	-0.09993751	8.85780720	-0.88522722		21.00000000	1.63523810	14.48462377	0.468421
22	-0.09010492	8.84970470	-0.79740189		22.00000000	1.56090909	13.81358452	0.489794
23	-0.08000214	8.85764500	-0.70863059		23.00000000	1.49304348	13.22484910	0.511279
24	-0.07016210	8.84738640	-0.62075124		24.00000000	1.43083333	12.65913537	0.532656
25	-0.06002137	8.85973640	-0.53177355		25.00000000	1.37360000	12.16973392	0.554020
26	-0.04986948	8.84783550	-0.44123696		26.00000000	1.32076923	11.68594889	0.575396
27	-0.04003465	8.86304760	-0.35482899		27.00000000	1.27185185	11.27248350	0.596873
28	-0.02990583	8.84407040	-0.26448923		28.00000000	1.22642857	10.84662063	0.618263
29	-0.02011714	8.85431580	-0.17812350		29.00000000	1.18413793	10.48473119	0.639645
30	-0.00993175	8.85076140	-0.08790359		30.00000000	1.14466667	10.13117155	0.660982
31	-0.00070425	8.85022540	-0.00623276		31.00000000	1.10774194	9.80376581	0.682578
32	0.00946530	8.85633180	0.08382783		32.00000000	1.07312500	9.50395106	0.703957
33	0.01928943	8.85367010	0.17078227		33.00000000	1.04060606	9.21318276	0.725340
34	0.02941871	8.84547420	0.26022243		34.00000000	1.01000000	8.93392894	0.746823
35	0.03923689	8.87651350	0.34828677		35.00000000	0.98114286	8.70912782	0.768208
36	0.04938924	8.85027030	0.43710809		36.00000000	0.95388889	8.44217450	0.789569
37	0.05921114	8.84867190	0.52393991		37.00000000	0.92810811	8.21252414	0.810963
38	0.06938878	8.86144730	0.61488505		38.00000000	0.90368421	8.00795001	0.832444
39	0.07953146	8.85625360	0.70435079		39.00000000	0.88051282	7.79804484	0.853823
40	0.08936750	8.85073470	0.79096804		40.00000000	0.85850000	7.59835574	0.875212
41	0.09948784	8.85640530	0.88110464		41.00000000	0.83756098	7.41777946	0.896589
42	0.10931198	8.84911920	0.96731474		42.00000000	0.81761905	7.23520841	0.918076
43	0.11945093	8.85639670	1.05790482		43.00000000	0.79860465	7.07275960	0.939453
44	0.12929292	8.84744360	1.14391182		44.00000000	0.78045455	6.90502757	0.960788
45	0.13943039	8.84739970	1.23359639		45.00000000	0.76311111	6.75154902	0.982178
46	0.14925006	8.85235980	1.32121523		46.00000000	0.74652174	6.60847903	1.003648
47	0.15941729	8.84882550	1.41065578		47.00000000	0.73063830	6.46529080	1.025015
48	0.16958155	8.86586950	1.50348789		48.00000000	0.71541667	6.34279080	1.046378
49	0.17938706	8.85533050	1.58853170		49.00000000	0.70081633	6.20596019	1.067756
50	0.18954165	8.85356140	1.67811864		50.00000000	0.68680000	6.08062597	1.089247
51	0.19931443	8.85737320	1.76540229		51.00000000	0.67333333	5.96396462	1.110642
52	0.20945412	8.85881040	1.85551434		52.00000000	0.66038462	5.85022210	1.131999
53	0.21927528	8.84723660	1.93998028		53.00000000	0.64792453	5.73234160	1.153370
54	0.22942911	8.83911230	2.02794967		54.00000000	0.63592593	5.62102067	1.174850
55	0.23921901	8.85248370	2.11768239		55.00000000	0.62436364	5.52716891	1.196231
56	0.24934606	8.85170940	2.20713886		56.00000000	0.61321429	5.42799466	1.217608
57	0.25953338	8.85145190	2.29724723		57.00000000	0.60245614	5.33261155	1.238971
58	0.26933444	8.84750180	2.38293694		58.00000000	0.59206897	5.23833124	1.260439
59	0.27949348	8.84896370	2.47322766		59.00000000	0.58203390	5.15039684	1.281822
60	0.28932431	8.85153870	2.56096533		60.00000000	0.57233333	5.06603065	1.303207
61	0.29947889	8.85105800	2.65070503		61.00000000	0.56295082	4.98271036	1.324549
62	0.30927700	8.86301610	2.74112703		62.00000000	0.55387097	4.90896730	1.346029
63	0.31942710	8.85134510	2.82735950		63.00000000	0.54507937	4.82468557	1.367398
64	0.32924974	8.84871480	2.91343705		64.00000000	0.53656250	4.74788853	1.388786
65	0.33939391	8.84356980	3.00145373		65.00000000	0.52830769	4.67212595	1.410266
66	0.34921059	8.85745810	3.09311817		66.00000000	0.52030303	4.60856229	1.431636
67	0.35936964	8.85388370	3.18181700		67.00000000	0.51253731	4.53794577	1.452982
68	0.36953315	8.83938790	3.26644685		68.00000000	0.50500000	4.46389089	1.474365
69	0.37935951	8.85415740	3.35890881		69.00000000	0.49768116	4.40654732	1.495838
70	0.38950220	8.83623030	3.44173114		70.00000000	0.49057143	4.33480212	1.517275
71	0.39934045	8.83754160	3.52918784		71.00000000	0.48366197	4.27438280	1.538642
72	0.40948164	8.85318760	3.62521778		72.00000000	0.47694444	4.22247864	1.560027
73	0.41929686	8.83707810	3.70535910		73.00000000	0.47041096	4.15705838	1.581511
74	0.42943653	8.83997540	3.79620836		74.00000000	0.46405405	4.10222642	1.602886
75	0.43924579	8.82373710	3.87578937		75.00000000	0.45786667	4.04009509	1.624229
76	0.44939739	8.83319280	3.96961379		76.00000000	0.45184211	3.99120843	1.645605
77	0.45954379	8.83129500	4.05836677		77.00000000	0.44597403	3.93852819	1.667087
78	0.46940142	8.81066800	4.13574007		78.00000000	0.44025641	3.87895307	1.688465
79	0.47955450	8.81143860	4.22556503		79.00000000	0.43468354	3.83018736	1.709818
80	0.48936674	8.78460790	4.29889493		80.00000000	0.42925000	3.77079294	1.731197
81	0.49946773	8.77296730	4.38181406		81.00000000	0.42395062	3.71930490	1.752673
82	0.50929928	8.74602320	4.45434332		82.00000000	0.41878049	3.66266386	1.774102
83	0.51945835	8.68948840	4.51382731		83.00000000	0.41373494	3.59514496	1.795457
84	0.52922070	8.63944630	4.57217382		84.00000000	0.40880952	3.53188793	1.816833
85	0.53937829	8.55173110	4.61261810		85.00000000	0.40400000	3.45489936	1.838327
86	0.54950607	8.42983910	4.63224775		86.00000000	0.39930233	3.36605436	1.859690
87	0.55930263	8.26243970	4.62120425		87.00000000	0.39471264	3.26128942	1.881073
88	0.56941855	8.01967140	4.56654966		88.00000000	0.39022727	3.12949450	1.902428
89	0.57923895	7.70983460	4.46583650		89.00000000	0.38584270	2.97478337	1.923894
90	0.58934963	7.26207260	4.27989980		90.00000000	0.38155556	2.77088415	1.945275
91	0.59917003	6.68982170	4.00834067		91.00000000	0.37736264	2.52448876	1.966663
92	0.60926282	5.92546220	3.61016381		92.00000000	0.37326087	2.21174317	1.988125
93	0.61906683	4.99740650	3.09372860		93.00000000	0.36924731	1.84527892	2.009635
94	0.62916487	3.80882170	2.39637681		94.00000000	0.36531915	1.39143550	2.031023
95	0.63927925	2.36860320	1.51419888		95.00000000	0.36147368	0.85618773	2.052463
96	0.64904237	0.69425040	0.45059792		96.00000000	0.35770833	0.24833915	2.073960
97	0.65913594	-1.32059990	-0.87045486		97.00000000	0.35402062	-0.46751959	2.095347
98	0.66887224	-3.60142250	-2.40889153		98.00000000	0.35040816	-1.26196784	2.116705
99	0.67900300	-6.36716790	-4.32332611		99.00000000	0.34686869	-2.20857117	2.138077
100	0.68891197	-9.47298430	-6.52605228		100.00000000	0.34340000	-3.25302281	2.159556
101	0.69039828	-10.00009300	-6.90404701		101.00000000	0.34000000	-3.40003162	2.180942
15:05 02/04/2018
Test Lot:	JK-PERC
Recipe:	Recipe_YJX-LID
Cell Name:	1-5-1.5h
Test Order:	4
Test Condition:	Light
1	-0.29993981	8.84771440	-2.65378178		1.00000000	34.34000000	303.83051250	0.000000
2	-0.29012561	8.85503580	-2.56907266		2.00000000	17.17000000	152.04096469	0.061808
3	-0.27998692	8.85006430	-2.47790225		3.00000000	11.44666667	101.30373602	0.083225
4	-0.27015558	8.86781980	-2.39569100		4.00000000	8.58500000	76.13023298	0.104754
5	-0.25998414	8.84765820	-2.30025081		5.00000000	6.86800000	60.76571652	0.126148
6	-0.24985287	8.85022640	-2.21125447		6.00000000	5.72333333	50.65279576	0.147501
7	-0.24001485	8.85594080	-2.12555730		7.00000000	4.90571429	43.44471530	0.168872
8	-0.22987168	8.84196190	-2.03251664		8.00000000	4.29250000	37.95412146	0.190354
9	-0.22005302	8.85731220	-1.94907830		9.00000000	3.81555556	33.79556677	0.211731
10	-0.20991580	8.85267640	-1.85831665		10.00000000	3.43400000	30.40009076	0.233130
11	-0.20008895	8.85111620	-1.77101055		11.00000000	3.12181818	27.63157548	0.254525
12	-0.18992643	8.85251620	-1.68132680		12.00000000	2.86166667	25.33295053	0.276013
13	-0.18014126	8.85017780	-1.59428218		13.00000000	2.64153846	23.37808505	0.297389
14	-0.16998543	8.86499880	-1.50692063		14.00000000	2.45285714	21.74457563	0.318754
15	-0.16017348	8.85821340	-1.41885087		15.00000000	2.28933333	20.27940321	0.340128
16	-0.15007198	8.85948370	-1.32956026		16.00000000	2.14625000	19.01466689	0.361608
17	-0.13991243	8.84844590	-1.23800757		17.00000000	2.02000000	17.87386072	0.382977
18	-0.13007963	8.84977720	-1.15117574		18.00000000	1.90777778	16.88340828	0.404347
19	-0.11995208	8.85774140	-1.06250451		19.00000000	1.80736842	16.00920209	0.425701
20	-0.11013342	8.86259270	-0.97606764		20.00000000	1.71700000	15.21707167	0.447164
21	-0.09998355	8.84798530	-0.88465299		21.00000000	1.63523810	14.46856263	0.468540
22	-0.09016042	8.86143300	-0.79895054		22.00000000	1.56090909	13.83189133	0.489932
23	-0.07998301	8.84355260	-0.70733396		23.00000000	1.49304348	13.20380853	0.511338
24	-0.07019486	8.85763450	-0.62176044		24.00000000	1.43083333	12.67379870	0.532800
25	-0.06003085	8.84465890	-0.53095241		25.00000000	1.37360000	12.14902347	0.554177
26	-0.04992787	8.85362910	-0.44204286		26.00000000	1.32076923	11.69360090	0.575577
27	-0.04005637	8.84724240	-0.35438838		27.00000000	1.27185185	11.25238163	0.596934
28	-0.02988938	8.85422800	-0.26464734		28.00000000	1.22642857	10.85907820	0.618418
29	-0.02009602	8.86523250	-0.17815588		29.00000000	1.18413793	10.49765807	0.639803
30	-0.00994689	8.84513470	-0.08798160		30.00000000	1.14466667	10.12473085	0.661170
31	-0.00067752	8.85680680	-0.00600062		31.00000000	1.10774194	9.81105631	0.682645
32	0.00943121	8.84866240	0.08345363		32.00000000	1.07312500	9.49572084	0.704124
33	0.01928458	8.85266300	0.17071987		33.00000000	1.04060606	9.21213477	0.725512
34	0.02943416	8.85717200	0.26070341		34.00000000	1.01000000	8.94574372	0.746895
35	0.03923691	8.85595040	0.34748014		35.00000000	0.98114286	8.68895248	0.768233
36	0.04941478	8.85111620	0.43737592		36.00000000	0.95388889	8.44298140	0.789701
37	0.05922721	8.85146140	0.52424733		37.00000000	0.92810811	8.21511309	0.811091
38	0.06937604	8.86200050	0.61481054		38.00000000	0.90368421	8.00844993	0.832475
39	0.07952488	8.84599400	0.70347663		39.00000000	0.88051282	7.78901113	0.853969
40	0.08935443	8.85235400	0.79099701		40.00000000	0.85850000	7.59974591	0.875333
41	0.09948912	8.85477070	0.88095337		41.00000000	0.83756098	7.41641039	0.896682
42	0.10932165	8.85409830	0.96794464		42.00000000	0.81761905	7.23927942	0.918065
43	0.11945932	8.84766290	1.05693579		43.00000000	0.79860465	7.06578474	0.939552
44	0.12929779	8.85513590	1.14494950		44.00000000	0.78045455	6.91103106	0.960941
45	0.13944069	8.85577680	1.23485563		45.00000000	0.76311111	6.75794167	0.982287
46	0.14925906	8.85336690	1.32144522		46.00000000	0.74652174	6.60923086	1.003656
47	0.15941609	8.84607410	1.41020654		47.00000000	0.73063830	6.46328052	1.025148
48	0.16956121	8.86063670	1.50242028		48.00000000	0.71541667	6.33904717	1.046521
49	0.17936173	8.84551530	1.58654693		49.00000000	0.70081633	6.19908154	1.067870
50	0.18948154	8.84893800	1.67671040		50.00000000	0.68680000	6.07745062	1.089253
51	0.19926865	8.85611060	1.76474520		51.00000000	0.67333333	5.96311447	1.110739
52	0.20939219	8.84506320	1.85208715		52.00000000	0.66038462	5.84114366	1.132125
53	0.21924257	8.84830380	1.93992487		53.00000000	0.64792453	5.73303307	1.153485
54	0.22939290	8.84681510	2.02939657		54.00000000	0.63592593	5.62591908	1.174864
55	0.23919491	8.85210230	2.11737781		55.00000000	0.62436364	5.52693078	1.196348
56	0.24934003	8.85479070	2.20785378		56.00000000	0.61321429	5.42988415	1.217739
57	0.25949854	8.85850520	2.29876917		57.00000000	0.60245614	5.33686085	1.239088
58	0.26932734	8.84556010	2.38235117		58.00000000	0.59206897	5.23718162	1.260460
59	0.27945608	8.84784320	2.47258358		59.00000000	0.58203390	5.14974467	1.281936
60	0.28931540	8.84823040	2.55992932		60.00000000	0.57233333	5.06413720	1.303311
61	0.29945755	8.84640310	2.64912220		61.00000000	0.56295082	4.98008988	1.324694
62	0.30927816	8.85099410	2.73741917		62.00000000	0.55387097	4.90230867	1.346053
63	0.31941360	8.84667970	2.82574981		63.00000000	0.54507937	4.82214255	1.367538
64	0.32924762	8.84638980	2.91265279		64.00000000	0.53656250	4.74664103	1.388920
65	0.33938307	8.84448050	3.00166694		65.00000000	0.52830769	4.67260708	1.410300
66	0.34921482	8.85770610	3.09324224		66.00000000	0.52030303	4.60869133	1.431639
67	0.35935175	8.84490590	3.17843241		67.00000000	0.51253731	4.53334431	1.453115
68	0.36952814	8.83936210	3.26639304		68.00000000	0.50500000	4.46387786	1.474499
69	0.37936065	8.84978100	3.35725867		69.00000000	0.49768116	4.40436927	1.495884
70	0.38949165	8.85151770	3.44759223		70.00000000	0.49057143	4.34230168	1.517362
71	0.39931822	8.82848740	3.52537587		71.00000000	0.48366197	4.27000362	1.538737
72	0.40946257	8.84579180	3.62202064		72.00000000	0.47694444	4.21895126	1.560095
73	0.41930699	8.84482960	3.70869888		73.00000000	0.47041096	4.16070477	1.581469
74	0.42941937	8.83484940	3.79385546		74.00000000	0.46405405	4.09984768	1.602945
75	0.43925786	8.83958240	3.88285605		75.00000000	0.45786667	4.04735013	1.624330
76	0.44939852	8.82541370	3.96612786		76.00000000	0.45184211	3.98769351	1.645675
77	0.45955628	8.83151820	4.05857965		77.00000000	0.44597403	3.93862773	1.667039
78	0.46939772	8.81155680	4.13612467		78.00000000	0.44025641	3.87934437	1.688530
79	0.47952497	8.80428410	4.22187407		79.00000000	0.43468354	3.82707742	1.709917
80	0.48933965	8.79749870	4.30496493		80.00000000	0.42925000	3.77632632	1.731269
81	0.49946615	8.75920490	4.37492635		81.00000000	0.42395062	3.71347032	1.752648
82	0.50928974	8.74372290	4.45308836		82.00000000	0.41878049	3.66170054	1.774128
83	0.51944381	8.69467350	4.51639433		83.00000000	0.41373494	3.59729022	1.795499
84	0.52921903	8.64665220	4.57597289		84.00000000	0.40880952	3.53483377	1.816874
85	0.53934401	8.55598260	4.61461796		85.00000000	0.40400000	3.45661697	1.838253
86	0.54945493	8.42904570	4.63138072		86.00000000	0.39930233	3.36573755	1.859740
87	0.55926657	8.26436140	4.62198105		87.00000000	0.39471264	3.26204794	1.881111
88	0.56942958	8.02826600	4.57153214		88.00000000	0.39022727	3.13284835	1.902460
89	0.57923007	7.70501420	4.46297591		89.00000000	0.38584270	2.97292346	1.923840
90	0.58935511	7.26030210	4.27889614		90.00000000	0.38155556	2.77020860	1.945353
91	0.59916532	6.70204260	4.01563150		91.00000000	0.37736264	2.52910047	1.966747
92	0.60927320	5.93175320	3.61405825		92.00000000	0.37326087	2.21409136	1.988229
93	0.61907744	5.02122780	3.10852885		93.00000000	0.36924731	1.85407487	2.009624
94	0.62916374	3.81476690	2.40011301		94.00000000	0.36531915	1.39360740	2.031113
95	0.63930666	2.37540150	1.51861000		95.00000000	0.36147368	0.85864513	2.052493
96	0.64905137	0.69748390	0.45270288		96.00000000	0.35770833	0.24949580	2.073885
97	0.65913546	-1.32905910	-0.87602998		97.00000000	0.35402062	-0.47051432	2.095228
98	0.66886675	-3.61706970	-2.41933765		98.00000000	0.35040816	-1.26745075	2.116704
99	0.67899698	-6.40729520	-4.35053409		99.00000000	0.34686869	-2.22249007	2.138069
100	0.68893069	-9.56651020	-6.59066247		100.00000000	0.34340000	-3.28513960	2.159492
101	0.69019002	-10.00006700	-6.90194644		101.00000000	0.34000000	-3.40002278	2.180970
