# Supplementary material for: Study on the Electrical Injection Regeneration of Industrialized B-Doped Czochralski Silicon PERC Solar Cells
Source: Hindawi journal article supplement (doi:10.1155/2019/5357370), 2019-06-20
Supplement: f1 [file 5357370.f1.zip › section3.2/IVRawData_1-5-2.5h.csv]

16:37 02/04/2018
Test Lot:	JK-PERC
Recipe:	Recipe_YJX-LID
Cell Name:	1-5-2.5h
Test Order:	2
Test Condition:	Light
1	-0.29996085	8.86814210	-2.66009544		1.00000000	34.34000000	304.53199971	0.000000
2	-0.29015854	8.84254840	-2.56574093		2.00000000	17.17000000	151.82655603	0.061796
3	-0.27999157	8.84701730	-2.47709026		3.00000000	11.44666667	101.26885803	0.083218
4	-0.27019969	8.84755800	-2.39060743		4.00000000	8.58500000	75.95628543	0.104725
5	-0.26000664	8.85453220	-2.30223717		5.00000000	6.86800000	60.81292715	0.126118
6	-0.24986494	8.84668830	-2.21047724		6.00000000	5.72333333	50.63254604	0.147470
7	-0.24007531	8.85914990	-2.12686316		7.00000000	4.90571429	43.46045822	0.168847
8	-0.22988969	8.85598090	-2.03589870		8.00000000	4.29250000	38.01429801	0.190344
9	-0.22009410	8.84882640	-1.94757448		9.00000000	3.81555556	33.76318873	0.211738
10	-0.20995687	8.85735610	-1.85966276		10.00000000	3.43400000	30.41616085	0.233157
11	-0.20013970	8.84822370	-1.77088084		11.00000000	3.12181818	27.62254562	0.254557
12	-0.18997791	8.85507970	-1.68226953		12.00000000	2.86166667	25.34028641	0.276052
13	-0.18022697	8.85219960	-1.59540511		13.00000000	2.64153846	23.38342571	0.297429
14	-0.17004584	8.85045340	-1.50498278		14.00000000	2.45285714	21.70889784	0.318784
15	-0.16025247	8.85381790	-1.41884619		15.00000000	2.28933333	20.26934045	0.340156
16	-0.15010408	8.86379620	-1.33049197		16.00000000	2.14625000	19.02392259	0.361648
17	-0.13994676	8.83929730	-1.23703102		17.00000000	2.02000000	17.85538055	0.383024
18	-0.13011543	8.85684200	-1.15241181		18.00000000	1.90777778	16.89688635	0.404374
19	-0.11995812	8.84509180	-1.06104058		19.00000000	1.80736842	15.98633960	0.425757
20	-0.11013349	8.85633280	-0.97537884		20.00000000	1.71700000	15.20632342	0.447240
21	-0.09997022	8.85329910	-0.88506628		21.00000000	1.63523810	14.47725196	0.468630
22	-0.09016569	8.85253620	-0.79819503		22.00000000	1.56090909	13.81800423	0.490033
23	-0.08004037	8.85020640	-0.70837382		23.00000000	1.49304348	13.21374295	0.511389
24	-0.07020087	8.85249140	-0.62145258		24.00000000	1.43083333	12.66643978	0.532872
25	-0.06005769	8.84579560	-0.53125804		25.00000000	1.37360000	12.15058484	0.554257
26	-0.04987729	8.84433360	-0.44113142		26.00000000	1.32076923	11.68132369	0.575641
27	-0.04010180	8.86160180	-0.35536615		27.00000000	1.27185185	11.27064466	0.597064
28	-0.02992810	8.84509660	-0.26471693		28.00000000	1.22642857	10.84787919	0.618531
29	-0.02010422	8.85476780	-0.17801820		29.00000000	1.18413793	10.48526642	0.639900
30	-0.00996700	8.85205550	-0.08822840		30.00000000	1.14466667	10.13265286	0.661273
31	-0.00068794	8.83255000	-0.00607624		31.00000000	1.10774194	9.78418603	0.682757
32	0.00947141	8.85861110	0.08390353		32.00000000	1.07312500	9.50639704	0.704252
33	0.01928459	8.85067750	0.17068168		33.00000000	1.04060606	9.21006865	0.725662
34	0.02938729	8.83554080	0.25965258		34.00000000	1.01000000	8.92389621	0.747034
35	0.03925555	8.85023500	0.34742080		35.00000000	0.98114286	8.68334485	0.768395
36	0.04939471	8.84754940	0.43702215		36.00000000	0.95388889	8.43957907	0.789873
37	0.05918929	8.85203930	0.52394589		37.00000000	0.92810811	8.21564945	0.811251
38	0.06935078	8.84625150	0.61349443		38.00000000	0.90368421	7.99421780	0.832642
39	0.07949664	8.85204410	0.70370780		39.00000000	0.88051282	7.79433832	0.854009
40	0.08931132	8.84846590	0.79026814		40.00000000	0.85850000	7.59640798	0.875497
41	0.09948546	8.84200380	0.87965085		41.00000000	0.83756098	7.40571733	0.896893
42	0.10927334	8.84394840	0.96640778		42.00000000	0.81761905	7.23098067	0.918282
43	0.11943037	8.85833930	1.05795474		43.00000000	0.79860465	7.07431097	0.939767
44	0.12925248	8.85600090	1.14466008		44.00000000	0.78045455	6.91170616	0.961145
45	0.13939388	8.84960940	1.23358139		45.00000000	0.76311111	6.75323526	0.982507
46	0.14921153	8.85479260	1.32123715		46.00000000	0.74652174	6.61029517	1.003883
47	0.15935740	8.84352780	1.40928160		47.00000000	0.73063830	6.46142010	1.025369
48	0.16951220	8.84793000	1.49983208		48.00000000	0.71541667	6.32995659	1.046755
49	0.17932314	8.84312920	1.58577770		49.00000000	0.70081633	6.19740932	1.068100
50	0.18946975	8.85992240	1.67868728		50.00000000	0.68680000	6.08499470	1.089492
51	0.19925912	8.82984160	1.75942647		51.00000000	0.67333333	5.94542668	1.111020
52	0.20942731	8.85121630	1.85368642		52.00000000	0.66038462	5.84520707	1.132398
53	0.21922113	8.83376030	1.93654692		53.00000000	0.64792453	5.72360998	1.153769
54	0.22939156	8.85876460	2.03212583		54.00000000	0.63592593	5.63351808	1.175146
55	0.23918837	8.83753970	2.11383672		55.00000000	0.62436364	5.51783842	1.196686
56	0.24934688	8.84949870	2.20659489		56.00000000	0.61321429	5.42663902	1.218094
57	0.25949425	8.84288690	2.29467830		57.00000000	0.60245614	5.32745151	1.239452
58	0.26932082	8.84474750	2.38207465		58.00000000	0.59206897	5.23670050	1.260841
59	0.27949274	8.84230800	2.47136089		59.00000000	0.58203390	5.14652300	1.282327
60	0.28929996	8.85705090	2.56234447		60.00000000	0.57233333	5.06918547	1.303702
61	0.29945475	8.83684920	2.64623647		61.00000000	0.56295082	4.97471150	1.325063
62	0.30926570	8.84332280	2.73493642		62.00000000	0.55387097	4.89805976	1.346448
63	0.31941009	8.84391690	2.82483629		63.00000000	0.54507937	4.82063661	1.367936
64	0.32922995	8.84932710	2.91346352		64.00000000	0.53656250	4.74821707	1.389337
65	0.33939222	8.84029200	3.00032633		65.00000000	0.52830769	4.67039427	1.410702
66	0.34922028	8.84511470	3.08889343		66.00000000	0.52030303	4.60213998	1.432071
67	0.35936019	8.84253790	3.17765610		67.00000000	0.51253731	4.53213062	1.453546
68	0.36951870	8.84107590	3.26694287		68.00000000	0.50500000	4.46474333	1.474947
69	0.37934378	8.84027000	3.35350144		69.00000000	0.49768116	4.39963582	1.496334
70	0.38948742	8.85310840	3.44817435		70.00000000	0.49057143	4.34308204	1.517688
71	0.39931175	8.83335300	3.52726164		71.00000000	0.48366197	4.27235693	1.539170
72	0.40946507	8.84907150	3.62338568		72.00000000	0.47694444	4.22051549	1.560557
73	0.41928124	8.83581260	3.70469046		73.00000000	0.47041096	4.15646308	1.581945
74	0.42941147	8.83368300	3.79328480		74.00000000	0.46405405	4.09930641	1.603437
75	0.43924251	8.83681200	3.88150348		75.00000000	0.45786667	4.04608165	1.624832
76	0.44940400	8.83307550	3.96961946		76.00000000	0.45184211	3.99115543	1.646189
77	0.45951489	8.82451250	4.05499489		77.00000000	0.44597403	3.93550337	1.667568
78	0.46936530	8.81642720	4.13812500		78.00000000	0.44025641	3.88148859	1.689056
79	0.47951561	8.81511690	4.22698616		79.00000000	0.43468354	3.83178626	1.710453
80	0.48933178	8.77499580	4.29388431		80.00000000	0.42925000	3.76666695	1.731809
81	0.49946424	8.76283840	4.37672442		81.00000000	0.42395062	3.71501075	1.753194
82	0.50929379	8.73349760	4.44791609		82.00000000	0.41878049	3.65741839	1.774678
83	0.51942182	8.67689990	4.50697114		83.00000000	0.41373494	3.58993666	1.796045
84	0.52920073	8.61744310	4.56035718		84.00000000	0.40880952	3.52289281	1.817405
85	0.53932947	8.54292490	4.60745116		85.00000000	0.40400000	3.45134166	1.838788
86	0.54949468	8.40481280	4.61839992		86.00000000	0.39930233	3.35606130	1.860263
87	0.55928409	8.23748110	4.60709212		87.00000000	0.39471264	3.25143794	1.881645
88	0.56940615	7.98779010	4.54829681		88.00000000	0.39022727	3.11705355	1.902994
89	0.57921630	7.66759250	4.44119456		89.00000000	0.38584270	2.95848457	1.924379
90	0.58931756	7.20448730	4.24573088		90.00000000	0.38155556	2.74891215	1.945877
91	0.59912401	6.62684110	3.97029961		91.00000000	0.37736264	2.50072223	1.967261
92	0.60922301	5.86262510	3.57164611		92.00000000	0.37326087	2.18828854	1.988731
93	0.61908007	4.94651320	3.06228774		93.00000000	0.36924731	1.82648670	2.010138
94	0.62919247	3.76345920	2.36794019		94.00000000	0.36531915	1.37486371	2.031638
95	0.63928103	2.35747770	1.50709077		95.00000000	0.36147368	0.85216615	2.053043
96	0.64907634	0.73156017	0.47483840		96.00000000	0.35770833	0.26168517	2.074446
97	0.65913808	-1.21897340	-0.80347179		97.00000000	0.35402062	-0.43154172	2.095818
98	0.66886646	-3.38632420	-2.26499868		98.00000000	0.35040816	-1.18659564	2.117317
99	0.67894161	-6.00301740	-4.07569830		99.00000000	0.34686869	-2.08225876	2.138692
100	0.68891329	-8.90803910	-6.13686652		100.00000000	0.34340000	-3.05902063	2.160084
101	0.69224763	-10.00011100	-6.92255314		101.00000000	0.34000000	-3.40003774	2.181435
16:37 02/04/2018
Test Lot:	JK-PERC
Recipe:	Recipe_YJX-LID
Cell Name:	1-5-2.5h
Test Order:	3
Test Condition:	Light
1	-0.29996404	8.85655400	-2.65664772		1.00000000	34.34000000	304.13406436	0.000000
2	-0.29011258	8.84616370	-2.56638337		2.00000000	17.17000000	151.88863073	0.061778
3	-0.27997831	8.85698800	-2.47976453		3.00000000	11.44666667	101.38298931	0.083206
4	-0.27017450	8.83465190	-2.38689766		4.00000000	8.58500000	75.84548656	0.104723
5	-0.26002234	8.84813980	-2.30071402		5.00000000	6.86800000	60.76902415	0.126104
6	-0.24984491	8.84323500	-2.20943725		6.00000000	5.72333333	50.61278165	0.147482
7	-0.24002248	8.86329460	-2.12738995		7.00000000	4.90571429	43.48079094	0.168850
8	-0.22987406	8.84090040	-2.03229367		8.00000000	4.29250000	37.94956497	0.190335
9	-0.22008736	8.85629180	-1.94915788		9.00000000	3.81555556	33.79167338	0.211721
10	-0.20993224	8.85380080	-1.85869823		10.00000000	3.43400000	30.40395195	0.233113
11	-0.20009941	8.84424590	-1.76972839		11.00000000	3.12181818	27.61012766	0.254509
12	-0.18993610	8.86264040	-1.68333535		12.00000000	2.86166667	25.36192261	0.275985
13	-0.18015461	8.84780600	-1.59397304		13.00000000	2.64153846	23.37181985	0.297363
14	-0.17003372	8.83899590	-1.50292735		14.00000000	2.45285714	21.68079423	0.318771
15	-0.16019195	8.85061450	-1.41779720		15.00000000	2.28933333	20.26200680	0.340258
16	-0.15004800	8.85908220	-1.32928757		16.00000000	2.14625000	19.01380517	0.361637
17	-0.13990255	8.84360890	-1.23724344		17.00000000	2.02000000	17.86408998	0.382991
18	-0.13007939	8.83651730	-1.14944878		18.00000000	1.90777778	16.85811134	0.404374
19	-0.11991683	8.86193750	-1.06269545		19.00000000	1.80736842	16.01678599	0.425849
20	-0.11011524	8.84370520	-0.97382672		20.00000000	1.71700000	15.18464183	0.447251
21	-0.09997278	8.85579110	-0.88533803		21.00000000	1.63523810	14.48132697	0.468612
22	-0.09013324	8.85143090	-0.79780810		22.00000000	1.56090909	13.81627896	0.489980
23	-0.07999151	8.84870340	-0.70782116		23.00000000	1.49304348	13.21149890	0.511465
24	-0.07016463	8.84670640	-0.62072586		24.00000000	1.43083333	12.65816241	0.532848
25	-0.05999090	8.84420780	-0.53057197		25.00000000	1.37360000	12.14840383	0.554206
26	-0.04984025	8.84599020	-0.44088632		26.00000000	1.32076923	11.68351167	0.575595
27	-0.04000964	8.86150740	-0.35454569		27.00000000	1.27185185	11.27052460	0.597091
28	-0.02987685	8.84332660	-0.26421070		28.00000000	1.22642857	10.84570841	0.618487
29	-0.02006782	8.86175920	-0.17783619		29.00000000	1.18413793	10.49354520	0.639837
30	-0.00991791	8.85387900	-0.08781198		30.00000000	1.14466667	10.13474016	0.661214
31	-0.00067306	8.84599880	-0.00595389		31.00000000	1.10774194	9.79908383	0.682829
32	0.00951088	8.84135720	0.08408907		32.00000000	1.07312500	9.48788145	0.704221
33	0.01932409	8.85885720	0.17118934		33.00000000	1.04060606	9.21858049	0.725560
34	0.02947297	8.83751390	0.26046775		34.00000000	1.01000000	8.92588904	0.746938
35	0.03930553	8.84950830	0.34783459		35.00000000	0.98114286	8.68263186	0.768430
36	0.04943208	8.83550830	0.43675753		36.00000000	0.95388889	8.42809320	0.789817
37	0.05924603	8.85630890	0.52470114		37.00000000	0.92810811	8.21961210	0.811205
38	0.06938969	8.84905240	0.61403303		38.00000000	0.90368421	7.99674893	0.832574
39	0.07953634	8.84371380	0.70339664		39.00000000	0.88051282	7.78700338	0.854062
40	0.08935327	8.85676570	0.79138099		40.00000000	0.85850000	7.60353335	0.875447
41	0.09949694	8.84260080	0.87981170		41.00000000	0.83756098	7.40621735	0.896827
42	0.10932280	8.85290620	0.96782449		42.00000000	0.81761905	7.23830474	0.918193
43	0.11944116	8.84659100	1.05664709		43.00000000	0.79860465	7.06492872	0.939674
44	0.12930350	8.84244060	1.14335852		44.00000000	0.78045455	6.90112296	0.961058
45	0.13943897	8.83223530	1.23155779		45.00000000	0.76311111	6.73997689	0.982449
46	0.14924325	8.84120560	1.31949026		46.00000000	0.74652174	6.60015218	1.003929
47	0.15939362	8.84328170	1.40956268		47.00000000	0.73063830	6.46124029	1.025311
48	0.16953580	8.86858840	1.50354323		48.00000000	0.71541667	6.34473595	1.046675
49	0.17938621	8.83703990	1.58524310		49.00000000	0.70081633	6.19314184	1.068063
50	0.18953137	8.84952450	1.67726250		50.00000000	0.68680000	6.07785343	1.089554
51	0.19931407	8.85547450	1.76502066		51.00000000	0.67333333	5.96268616	1.110947
52	0.20944211	8.84263420	1.85201996		52.00000000	0.66038462	5.83953959	1.132305
53	0.21925829	8.85612010	1.94177775		53.00000000	0.64792453	5.73809744	1.153684
54	0.22943322	8.85464950	2.03155075		54.00000000	0.63592593	5.63090118	1.175171
55	0.23925164	8.84079650	2.11517506		55.00000000	0.62436364	5.51987185	1.196567
56	0.24939902	8.85635570	2.20876643		56.00000000	0.61321429	5.43084383	1.217933
57	0.25955236	8.84587480	2.29596768		57.00000000	0.60245614	5.32925159	1.239320
58	0.26938269	8.84594150	2.38294352		58.00000000	0.59206897	5.23740743	1.260801
59	0.27952412	8.84557150	2.47255059		59.00000000	0.58203390	5.14842246	1.282196
60	0.28933585	8.85389710	2.56174984		60.00000000	0.57233333	5.06738044	1.303545
61	0.29949442	8.84320830	2.64849154		61.00000000	0.56295082	4.97829136	1.324937
62	0.30932325	8.84732720	2.73668400		62.00000000	0.55387097	4.90027768	1.346425
63	0.31944680	8.84074500	2.82414770		63.00000000	0.54507937	4.81890767	1.367802
64	0.32926598	8.84166150	2.91125834		64.00000000	0.53656250	4.74410400	1.389149
65	0.33941785	8.84469030	3.00204577		65.00000000	0.52830769	4.67271792	1.410525
66	0.34924668	8.84599880	3.08943571		66.00000000	0.52030303	4.60259998	1.432000
67	0.35939556	8.83615590	3.17567520		67.00000000	0.51253731	4.52885961	1.453391
68	0.36955112	8.85489370	3.27233588		68.00000000	0.50500000	4.47172132	1.474769
69	0.37937325	8.84072020	3.35393275		69.00000000	0.49768116	4.39985988	1.496135
70	0.38952363	8.83743860	3.44239116		70.00000000	0.49057143	4.33539488	1.517619
71	0.39934430	8.84030630	3.53032593		71.00000000	0.48366197	4.27571998	1.538987
72	0.40949240	8.83933160	3.61963911		72.00000000	0.47694444	4.21587010	1.560381
73	0.41931680	8.83016780	3.70263771		73.00000000	0.47041096	4.15380770	1.581732
74	0.42945004	8.83471390	3.79406824		74.00000000	0.46405405	4.09978480	1.603213
75	0.43925282	8.82629390	3.87697449		75.00000000	0.45786667	4.04126577	1.624585
76	0.44942105	8.82505230	3.96616427		76.00000000	0.45184211	3.98753021	1.645982
77	0.45956472	8.82342530	4.05493498		77.00000000	0.44597403	3.93501850	1.667462
78	0.46941960	8.81726740	4.13899814		78.00000000	0.44025641	3.88185849	1.688844
79	0.47954094	8.79785160	4.21893003		79.00000000	0.43468354	3.82428132	1.710215
80	0.48938319	8.77436730	4.29402786		80.00000000	0.42925000	3.76639716	1.731592
81	0.49949113	8.76396750	4.37752403		81.00000000	0.42395062	3.71548943	1.753082
82	0.50931400	8.72346210	4.44298138		82.00000000	0.41878049	3.65321571	1.774479
83	0.51946884	8.68456940	4.51136319		83.00000000	0.41373494	3.59310980	1.795826
84	0.52924186	8.63607690	4.57057340		84.00000000	0.40880952	3.53051049	1.817219
85	0.53937584	8.53203490	4.60197349		85.00000000	0.40400000	3.44694210	1.838708
86	0.54951727	8.41087720	4.62192228		86.00000000	0.39930233	3.35848283	1.860083
87	0.55935359	8.24090670	4.60958075		87.00000000	0.39471264	3.25279007	1.881445
88	0.56945479	7.99420120	4.55233617		88.00000000	0.39022727	3.11955533	1.902831
89	0.57927024	7.67280200	4.44462586		89.00000000	0.38584270	2.96049461	1.924348
90	0.58939087	7.21698190	4.25362324		90.00000000	0.38155556	2.75367954	1.945761
91	0.59919292	6.66070700	3.99104848		91.00000000	0.37736264	2.51350196	1.967110
92	0.60930306	5.88331220	3.58472013		92.00000000	0.37326087	2.19601023	1.988578
93	0.61910439	4.96366550	3.07302710		93.00000000	0.36924731	1.83282014	2.010109
94	0.62922198	3.78627780	2.38240921		94.00000000	0.36531915	1.38319978	2.031497
95	0.63932842	2.36597010	1.51263193		95.00000000	0.36147368	0.85523593	2.052847
96	0.64910966	0.73493463	0.47705317		96.00000000	0.35770833	0.26289224	2.074293
97	0.65916473	-1.24357750	-0.81972243		97.00000000	0.35402062	-0.44025208	2.095790
98	0.66889757	-3.43354870	-2.29669238		98.00000000	0.35040816	-1.20314349	2.117187
99	0.67901593	-6.09402510	-4.13794012		99.00000000	0.34686869	-2.11382648	2.138552
100	0.68895942	-9.06062790	-6.24240494		100.00000000	0.34340000	-3.11141962	2.159910
101	0.69176453	-9.99997230	-6.91762614		101.00000000	0.34000000	-3.39999058	2.181384
16:38 02/04/2018
Test Lot:	JK-PERC
Recipe:	Recipe_YJX-LID
Cell Name:	1-5-2.5h
Test Order:	4
Test Condition:	Light
1	-0.29996389	8.85694980	-2.65676512		1.00000000	34.34000000	304.14765613	0.000000
2	-0.29009977	8.85630610	-2.56921236		2.00000000	17.17000000	152.06277574	0.061794
3	-0.27999157	8.84824660	-2.47743446		3.00000000	11.44666667	101.28292941	0.083230
4	-0.27017808	8.85420130	-2.39221111		4.00000000	8.58500000	76.01331816	0.104744
5	-0.26003784	8.84073350	-2.29892524		5.00000000	6.86800000	60.71815768	0.126120
6	-0.24985519	8.84165860	-2.20913429		6.00000000	5.72333333	50.60375939	0.147543
7	-0.24003576	8.85905460	-2.12648990		7.00000000	4.90571429	43.45999071	0.168945
8	-0.22992158	8.85191350	-2.03524594		8.00000000	4.29250000	37.99683870	0.190433
9	-0.22009097	8.83731940	-1.94501420		9.00000000	3.81555556	33.71928313	0.211816
10	-0.20992617	8.84670350	-1.85715458		10.00000000	3.43400000	30.37957982	0.233183
11	-0.20014991	8.85377410	-1.77208209		11.00000000	3.12181818	27.63987296	0.254567
12	-0.18998438	8.84017660	-1.67949547		12.00000000	2.86166667	25.29763870	0.276051
13	-0.18018802	8.85475730	-1.59552119		13.00000000	2.64153846	23.39018198	0.297426
14	-0.17007384	8.85623550	-1.50621398		14.00000000	2.45285714	21.72308051	0.318791
15	-0.16021048	8.84527110	-1.41710513		15.00000000	2.28933333	20.24977397	0.340166
16	-0.15008514	8.84135440	-1.32695591		16.00000000	2.14625000	18.97575688	0.361662
17	-0.13995458	8.84902760	-1.23846194		17.00000000	2.02000000	17.87503575	0.383042
18	-0.13011579	8.84750940	-1.15120068		18.00000000	1.90777778	16.87908182	0.404442
19	-0.11999194	8.84319690	-1.06111235		19.00000000	1.80736842	15.98291482	0.425783
20	-0.11015166	8.84150980	-0.97390698		20.00000000	1.71700000	15.18087233	0.447271
21	-0.09997422	8.84536460	-0.88430838		21.00000000	1.63523810	14.46427716	0.468659
22	-0.09017041	8.84642980	-0.79768617		22.00000000	1.56090909	13.80847270	0.490044
23	-0.08000933	8.84661960	-0.70781214		23.00000000	1.49304348	13.20838770	0.511526
24	-0.07017948	8.85785480	-0.62163962		24.00000000	1.43083333	12.67411391	0.532924
25	-0.06003776	8.83048820	-0.53016271		25.00000000	1.37360000	12.12955859	0.554285
26	-0.04990200	8.86276250	-0.44226954		26.00000000	1.32076923	11.70566401	0.575672
27	-0.04003790	8.84112740	-0.35398014		27.00000000	1.27185185	11.24460426	0.597156
28	-0.02989171	8.85372920	-0.26465314		28.00000000	1.22642857	10.85846645	0.618531
29	-0.02008567	8.84395790	-0.17763684		29.00000000	1.18413793	10.47246601	0.639934
30	-0.00996554	8.84193040	-0.08811461		30.00000000	1.14466667	10.12106300	0.661319
31	-0.00070283	8.85970400	-0.00622687		31.00000000	1.10774194	9.81426566	0.682927
32	0.00947292	8.83799650	0.08372161		32.00000000	1.07312500	9.48427499	0.704321
33	0.01927645	8.85485360	0.17069012		33.00000000	1.04060606	9.21441432	0.725668
34	0.02942160	8.84571360	0.26025501		34.00000000	1.01000000	8.93417074	0.747041
35	0.03925787	8.85194680	0.34750860		35.00000000	0.98114286	8.68502437	0.768544
36	0.04942089	8.83391670	0.43657999		36.00000000	0.95388889	8.42657499	0.789921
37	0.05922293	8.85272600	0.52428436		37.00000000	0.92810811	8.21628678	0.811258
38	0.06937552	8.84981920	0.61396083		38.00000000	0.90368421	7.99744188	0.832655
39	0.07951993	8.84278770	0.70317784		39.00000000	0.88051282	7.78618794	0.854134
40	0.08935248	8.84799480	0.79059029		40.00000000	0.85850000	7.59600354	0.875539
41	0.09946414	8.85992720	0.88124505		41.00000000	0.83756098	7.42072927	0.896907
42	0.10928925	8.84853080	0.96704929		42.00000000	0.81761905	7.23472733	0.918287
43	0.11944854	8.84523110	1.05654994		43.00000000	0.79860465	7.06384270	0.939776
44	0.12926696	8.85431670	1.14457060		44.00000000	0.78045455	6.91039172	0.961150
45	0.13941881	8.84581570	1.23327310		45.00000000	0.76311111	6.75034025	0.982516
46	0.14922456	8.84557820	1.31997751		46.00000000	0.74652174	6.60341642	1.003884
47	0.15936972	8.85105900	1.41059079		47.00000000	0.73063830	6.46692268	1.025359
48	0.16949923	8.83131310	1.49690077		48.00000000	0.71541667	6.31806858	1.046739
49	0.17933179	8.85634900	1.58822492		49.00000000	0.70081633	6.20667397	1.068134
50	0.18947992	8.85113720	1.67711277		50.00000000	0.68680000	6.07896103	1.089476
51	0.19927602	8.83922860	1.76144630		51.00000000	0.67333333	5.95174726	1.110957
52	0.20941000	8.85157780	1.85360891		52.00000000	0.66038462	5.84544580	1.132351
53	0.21924181	8.83862780	1.93779676		53.00000000	0.64792453	5.72676375	1.153756
54	0.22937356	8.85913280	2.03205083		54.00000000	0.63592593	5.63375223	1.175293
55	0.23921058	8.82983780	2.11219062		55.00000000	0.62436364	5.51302964	1.196686
56	0.24935201	8.85751250	2.20863855		56.00000000	0.61321429	5.43155320	1.218043
57	0.25949270	8.83555030	2.29276080		57.00000000	0.60245614	5.32303153	1.239432
58	0.26932898	8.83568570	2.37970622		58.00000000	0.59206897	5.23133529	1.260922
59	0.27948752	8.85577870	2.47507963		59.00000000	0.58203390	5.15436340	1.282313
60	0.28931934	8.84815310	2.55994182		60.00000000	0.57233333	5.06409296	1.303680
61	0.29945704	8.83405690	2.64542053		61.00000000	0.56295082	4.97313957	1.325064
62	0.30927545	8.84661670	2.73604136		62.00000000	0.55387097	4.89988415	1.346544
63	0.31942508	8.85002420	2.82691969		63.00000000	0.54507937	4.82396557	1.367935
64	0.32924050	8.83782010	2.90976831		64.00000000	0.53656250	4.74204285	1.389281
65	0.33938640	8.83936690	2.99996091		65.00000000	0.52830769	4.66990553	1.410658
66	0.34921300	8.84379580	3.08836846		66.00000000	0.52030303	4.60145375	1.432156
67	0.35937750	8.84173680	3.17752127		67.00000000	0.51253731	4.53172003	1.453541
68	0.36950999	8.83741280	3.26551232		68.00000000	0.50500000	4.46289346	1.474893
69	0.37935001	8.84040640	3.35360826		69.00000000	0.49768116	4.39970371	1.496284
70	0.38947654	8.82577040	3.43743052		70.00000000	0.49057143	4.32967079	1.517770
71	0.39931431	8.84468560	3.53180953		71.00000000	0.48366197	4.27783808	1.539171
72	0.40946615	8.83767990	3.61873076		72.00000000	0.47694444	4.21508233	1.560528
73	0.41928977	8.84163190	3.70720581		73.00000000	0.47041096	4.15920054	1.581902
74	0.42940515	8.83518980	3.79387600		74.00000000	0.46405405	4.10000565	1.603383
75	0.43922728	8.81736950	3.87282922		75.00000000	0.45786667	4.03717958	1.624768
76	0.44940296	8.83868410	3.97213080		76.00000000	0.45184211	3.99368963	1.646142
77	0.45952579	8.80968760	4.04827865		77.00000000	0.44597403	3.92889185	1.667520
78	0.46937993	8.81675050	4.13840573		78.00000000	0.44025641	3.88163093	1.689008
79	0.47950721	8.79138370	4.21553187		79.00000000	0.43468354	3.82146983	1.710384
80	0.48934871	8.77838800	4.29569284		80.00000000	0.42925000	3.76812305	1.731813
81	0.49944845	8.76950840	4.37991738		81.00000000	0.42395062	3.71783850	1.753158
82	0.50928396	8.72365090	4.44281548		82.00000000	0.41878049	3.65329478	1.774643
83	0.51943660	8.68520740	4.51141460		83.00000000	0.41373494	3.59337376	1.796031
84	0.52919918	8.63318540	4.56867463		84.00000000	0.40880952	3.52932841	1.817409
85	0.53934658	8.51696590	4.59359643		85.00000000	0.40400000	3.44085422	1.838907
86	0.54950511	8.42108920	4.62743155		86.00000000	0.39930233	3.36256050	1.860297
87	0.55930936	8.22916030	4.60264638		87.00000000	0.39471264	3.24815362	1.881649
88	0.56945676	7.99788380	4.55444900		88.00000000	0.39022727	3.12099238	1.903044
89	0.57926029	7.66346840	4.43914293		89.00000000	0.38584270	2.95689331	1.924540
90	0.58935857	7.21488520	4.25215442		90.00000000	0.38155556	2.75287953	1.945935
91	0.59916580	6.64967350	3.98425694		91.00000000	0.37736264	2.50933833	1.967303
92	0.60924768	5.87042470	3.57654263		92.00000000	0.37326087	2.19119983	1.988787
93	0.61906385	4.96440600	3.07328429		93.00000000	0.36924731	1.83309357	2.010310
94	0.62921125	3.75702520	2.36396252		94.00000000	0.36531915	1.37251325	2.031757
95	0.63932514	2.36001040	1.50881398		95.00000000	0.36147368	0.85308165	2.053113
96	0.64905202	0.72004026	0.46734359		96.00000000	0.35770833	0.25756440	2.074536
97	0.65915549	-1.24525750	-0.82081832		97.00000000	0.35402062	-0.44084683	2.096031
98	0.66889274	-3.44653510	-2.30536231		98.00000000	0.35040816	-1.20769403	2.117410
99	0.67899030	-6.09844880	-4.14078758		99.00000000	0.34686869	-2.11536093	2.138806
100	0.68895233	-9.06527610	-6.24554309		100.00000000	0.34340000	-3.11301581	2.160233
101	0.69179022	-9.99998280	-6.91789030		101.00000000	0.34000000	-3.39999415	2.181734
