# Supplementary material for: Study on the Electrical Injection Regeneration of Industrialized B-Doped Czochralski Silicon PERC Solar Cells
Source: Hindawi journal article supplement (doi:10.1155/2019/5357370), 2019-06-20
Supplement: f1 [file 5357370.f1.zip › section3.2/IVRawData_1-5-2h.csv]

15:56 02/04/2018
Test Lot:	JK-PERC
Recipe:	Recipe_YJX-LID
Cell Name:	1-5-2h
Test Order:	2
Test Condition:	Light
1	-0.29990521	8.85082910	-2.65440976		1.00000000	34.34000000	303.93747129	0.000000
2	-0.29009482	8.86795330	-2.57254732		2.00000000	17.17000000	152.26275816	0.061797
3	-0.27997631	8.85223770	-2.47841685		3.00000000	11.44666667	101.32861421	0.083226
4	-0.27017558	8.85328770	-2.39194214		4.00000000	8.58500000	76.00547490	0.104714
5	-0.26000348	8.85597130	-2.30258336		5.00000000	6.86800000	60.82281089	0.126115
6	-0.24987377	8.85380840	-2.21233448		6.00000000	5.72333333	50.67329674	0.147462
7	-0.24002618	8.85698890	-2.12590921		7.00000000	4.90571429	43.44985698	0.168833
8	-0.22985779	8.86457060	-2.03759061		8.00000000	4.29250000	38.05116930	0.190370
9	-0.22004069	8.85752300	-1.94901547		9.00000000	3.81555556	33.79637109	0.211758
10	-0.20991993	8.85317040	-1.85845691		10.00000000	3.43400000	30.40178715	0.233125
11	-0.20005745	8.86357310	-1.77322383		11.00000000	3.12181818	27.67046366	0.254504
12	-0.18993519	8.84092140	-1.67920209		12.00000000	2.86166667	25.29977007	0.275988
13	-0.18017468	8.87096790	-1.59832380		13.00000000	2.64153846	23.43300290	0.297368
14	-0.16999809	8.85585120	-1.50547779		14.00000000	2.45285714	21.72213787	0.318731
15	-0.16017729	8.85880950	-1.41898010		15.00000000	2.28933333	20.28076788	0.340107
16	-0.15007812	8.85977460	-1.32965832		16.00000000	2.14625000	19.01529124	0.361589
17	-0.13985911	8.83649540	-1.23586438		17.00000000	2.02000000	17.84972071	0.382956
18	-0.13003905	8.86300850	-1.15253721		18.00000000	1.90777778	16.90865066	0.404315
19	-0.11990489	8.85024640	-1.06118782		19.00000000	1.80736842	15.99565586	0.425692
20	-0.11007664	8.84105970	-0.97319415		20.00000000	1.71700000	15.18009950	0.447164
21	-0.09994099	8.85844610	-0.88532190		21.00000000	1.63523810	14.48566853	0.468535
22	-0.09009934	8.85173510	-0.79753551		22.00000000	1.56090909	13.81675379	0.489930
23	-0.07996593	8.84964280	-0.70766995		23.00000000	1.49304348	13.21290147	0.511270
24	-0.07014289	8.85943410	-0.62142629		24.00000000	1.43083333	12.67637362	0.532754
25	-0.05997078	8.84308530	-0.53032670		25.00000000	1.37360000	12.14686197	0.554132
26	-0.04984332	8.85926340	-0.44157512		26.00000000	1.32076923	11.70104251	0.575508
27	-0.04002995	8.86003300	-0.35466671		27.00000000	1.27185185	11.26864938	0.596997
28	-0.02987868	8.85675050	-0.26462801		28.00000000	1.22642857	10.86217186	0.618391
29	-0.02004373	8.86226460	-0.17763281		29.00000000	1.18413793	10.49414367	0.639738
30	-0.00990287	8.85502340	-0.08769019		30.00000000	1.14466667	10.13605012	0.661126
31	-0.00065591	8.86148640	-0.00581230		31.00000000	1.10774194	9.81624010	0.682732
32	0.00949218	8.84434030	0.08395208		32.00000000	1.07312500	9.49108268	0.704111
33	0.01930676	8.85606290	0.17098186		33.00000000	1.04060606	9.21567273	0.725467
34	0.02942574	8.84838960	0.26037039		34.00000000	1.01000000	8.93687350	0.746852
35	0.03924181	8.84617330	0.34713982		35.00000000	0.98114286	8.67935975	0.768332
36	0.04937493	8.85332110	0.43713208		36.00000000	0.95388889	8.44508463	0.789719
37	0.05919918	8.83723260	0.52315690		37.00000000	0.92810811	8.20190723	0.811071
38	0.06934644	8.87147140	0.61520499		38.00000000	0.90368421	8.01700863	0.832457
39	0.07951900	8.85554700	0.70418428		39.00000000	0.88051282	7.79742267	0.853937
40	0.08932986	8.85633180	0.79113489		40.00000000	0.85850000	7.60316085	0.875309
41	0.09946372	8.84827420	0.88008230		41.00000000	0.83756098	7.41096917	0.896675
42	0.10927979	8.85195060	0.96733930		42.00000000	0.81761905	7.23752342	0.918052
43	0.11942706	8.85143470	1.05710082		43.00000000	0.79860465	7.06879692	0.939547
44	0.12925354	8.84652520	1.14344470		44.00000000	0.78045455	6.90431080	0.960939
45	0.13940080	8.85495000	1.23438711		45.00000000	0.76311111	6.75731073	0.982285
46	0.14921612	8.85417560	1.32118573		46.00000000	0.74652174	6.60983457	1.003653
47	0.15937306	8.84917830	1.41032062		47.00000000	0.73063830	6.46554857	1.025143
48	0.16952330	8.86570070	1.50294284		48.00000000	0.71541667	6.34267004	1.046511
49	0.17935127	8.84930520	1.58713413		49.00000000	0.70081633	6.20173756	1.067895
50	0.18951342	8.86251830	1.67956615		50.00000000	0.68680000	6.08677757	1.089260
51	0.19927217	8.84881690	1.76332295		51.00000000	0.67333333	5.95820338	1.110750
52	0.20943284	8.85681530	1.85490798		52.00000000	0.66038462	5.84890457	1.132140
53	0.21926007	8.85142330	1.94076369		53.00000000	0.64792453	5.73505427	1.153525
54	0.22942296	8.84846120	2.03004016		54.00000000	0.63592593	5.62696588	1.174872
55	0.23923381	8.85629180	2.11872443		55.00000000	0.62436364	5.52954655	1.196344
56	0.24938852	8.84370330	2.20551808		56.00000000	0.61321429	5.42308520	1.217731
57	0.25951049	8.85229970	2.29726463		57.00000000	0.60245614	5.33312231	1.239108
58	0.26934737	8.84905340	2.38346926		58.00000000	0.59206897	5.23924989	1.260590
59	0.27948719	8.84210110	2.47125399		59.00000000	0.58203390	5.14640257	1.281964
60	0.28931218	8.84561250	2.55914344		60.00000000	0.57233333	5.06263889	1.303316
61	0.29946840	8.85853580	2.65285154		61.00000000	0.56295082	4.98691999	1.324703
62	0.30929190	8.83785340	2.73347647		62.00000000	0.55387097	4.89503042	1.346177
63	0.31942949	8.85533330	2.82865460		63.00000000	0.54507937	4.82685945	1.367548
64	0.32925373	8.84201910	2.91126777		64.00000000	0.53656250	4.74429587	1.388902
65	0.33940324	8.85847280	3.00659437		65.00000000	0.52830769	4.67999932	1.410277
66	0.34922302	8.83891680	3.08675322		66.00000000	0.52030303	4.59891520	1.431759
67	0.35935166	8.85584450	3.18236242		67.00000000	0.51253731	4.53895075	1.453137
68	0.36951455	8.84463120	3.26821992		68.00000000	0.50500000	4.46653876	1.474477
69	0.37932244	8.83861830	3.35268626		69.00000000	0.49768116	4.39881380	1.495857
70	0.38946524	8.85012340	3.44681543		70.00000000	0.49057143	4.34161768	1.517341
71	0.39928874	8.83687590	3.52846504		71.00000000	0.48366197	4.27406082	1.538713
72	0.40944493	8.83987330	3.61944130		72.00000000	0.47694444	4.21612846	1.560074
73	0.41926101	8.84205250	3.70712786		73.00000000	0.47041096	4.15939840	1.581450
74	0.42939562	8.83750820	3.79478731		74.00000000	0.46405405	4.10108151	1.602930
75	0.43923846	8.83062550	3.87875035		75.00000000	0.45786667	4.04324906	1.624314
76	0.44939914	8.83743670	3.97153645		76.00000000	0.45184211	3.99312600	1.645663
77	0.45951810	8.81894490	4.05246480		77.00000000	0.44597403	3.93302036	1.667029
78	0.46936768	8.81815050	4.13895484		78.00000000	0.44025641	3.88224728	1.688508
79	0.47952014	8.80270390	4.22107381		79.00000000	0.43468354	3.82639053	1.709889
80	0.48935184	8.78499510	4.29895352		80.00000000	0.42925000	3.77095915	1.731268
81	0.49945220	8.76229860	4.37634931		81.00000000	0.42395062	3.71478190	1.752637
82	0.50928390	8.73107050	4.44659364		82.00000000	0.41878049	3.65640196	1.774122
83	0.51943785	8.69036010	4.51410197		83.00000000	0.41373494	3.59550561	1.795503
84	0.52922863	8.62828450	4.56633519		84.00000000	0.40880952	3.52732488	1.816899
85	0.53936100	8.53242870	4.60205928		85.00000000	0.40400000	3.44710119	1.838239
86	0.54949188	8.41588400	4.62445992		86.00000000	0.39930233	3.36048205	1.859714
87	0.55930346	8.24291520	4.61029099		87.00000000	0.39471264	3.25358285	1.881091
88	0.56944555	7.99148850	4.55071756		88.00000000	0.39022727	3.11849676	1.902475
89	0.57925415	7.67307900	4.44466285		89.00000000	0.38584270	2.96060149	1.923976
90	0.58933967	7.22702690	4.25917365		90.00000000	0.38155556	2.75751226	1.945357
91	0.59915054	6.64545680	3.98162903		91.00000000	0.37736264	2.50774710	1.966701
92	0.60925537	5.88651420	3.58639039		92.00000000	0.37326087	2.19720541	1.988178
93	0.61905730	4.96003100	3.07054340		93.00000000	0.36924731	1.83147811	2.009692
94	0.62918144	3.78657600	2.38244334		94.00000000	0.36531915	1.38330872	2.031090
95	0.63927811	2.36109350	1.50939539		95.00000000	0.36147368	0.85347317	2.052433
96	0.64909643	0.74146408	0.48128169		96.00000000	0.35770833	0.26522788	2.073814
97	0.65911788	-1.22271900	-0.80591596		97.00000000	0.35402062	-0.43286774	2.095286
98	0.66888559	-3.40768410	-2.27935079		98.00000000	0.35040816	-1.19408033	2.116663
99	0.67896807	-6.03441480	-4.09717497		99.00000000	0.34686869	-2.09314954	2.138008
100	0.68892705	-8.98412420	-6.18940618		100.00000000	0.34340000	-3.08514825	2.159394
101	0.69200683	-10.00012900	-6.92015757		101.00000000	0.34000000	-3.40004386	2.180908
15:56 02/04/2018
Test Lot:	JK-PERC
Recipe:	Recipe_YJX-LID
Cell Name:	1-5-2h
Test Order:	3
Test Condition:	Light
1	-0.29991040	8.85704330	-2.65631940		1.00000000	34.34000000	304.15086692	0.000000
2	-0.29011187	8.85364530	-2.56854759		2.00000000	17.17000000	152.01708980	0.061735
3	-0.27997175	8.85119720	-2.47808517		3.00000000	11.44666667	101.31670395	0.083134
4	-0.27011669	8.84454150	-2.38905827		4.00000000	8.58500000	75.93038878	0.104716
5	-0.26000184	8.86986730	-2.30618182		5.00000000	6.86800000	60.91824862	0.126116
6	-0.24977687	8.84398940	-2.20902399		6.00000000	5.72333333	50.61709933	0.147509
7	-0.23996051	8.86989690	-2.12842498		7.00000000	4.90571429	43.51317994	0.168864
8	-0.22983824	8.84873100	-2.03377676		8.00000000	4.29250000	37.98317782	0.190348
9	-0.21998316	8.85315130	-1.94754420		9.00000000	3.81555556	33.77969063	0.211732
10	-0.20985270	8.85660460	-1.85858239		10.00000000	3.43400000	30.41358020	0.233128
11	-0.20001996	8.84971520	-1.77011968		11.00000000	3.12181818	27.62720182	0.254613
12	-0.18988429	8.85354710	-1.68114951		12.00000000	2.86166667	25.33590062	0.275989
13	-0.18010290	8.85397620	-1.59462679		13.00000000	2.64153846	23.38811867	0.297368
14	-0.16994268	8.84759430	-1.50358389		14.00000000	2.45285714	21.70188488	0.318745
15	-0.16012780	8.84836390	-1.41686904		15.00000000	2.28933333	20.25685442	0.340293
16	-0.14999139	8.85834500	-1.32867548		16.00000000	2.14625000	19.01222296	0.361693
17	-0.13982745	8.85267930	-1.23784757		17.00000000	2.02000000	17.88241219	0.383037
18	-0.13001405	8.85493090	-1.15126543		18.00000000	1.90777778	16.89324039	0.404430
19	-0.11985010	8.85181140	-1.06089048		19.00000000	1.80736842	15.99848439	0.425909
20	-0.11004787	8.85734370	-0.97473181		20.00000000	1.71700000	15.20805913	0.447285
21	-0.09988913	8.86097720	-0.88511529		21.00000000	1.63523810	14.48980748	0.468649
22	-0.09011221	8.84378720	-0.79693320		22.00000000	1.56090909	13.80434784	0.490023
23	-0.07995645	8.85475540	-0.70799481		23.00000000	1.49304348	13.22053480	0.511500
24	-0.07009766	8.84908960	-0.62030043		24.00000000	1.43083333	12.66157237	0.532897
25	-0.05997464	8.83602910	-0.52993770		25.00000000	1.37360000	12.13716957	0.554258
26	-0.04981739	8.86321830	-0.44154244		26.00000000	1.32076923	11.70626602	0.575634
27	-0.04000772	8.84611230	-0.35391280		27.00000000	1.27185185	11.25094431	0.597130
28	-0.02985940	8.85476680	-0.26439805		28.00000000	1.22642857	10.85973900	0.618514
29	-0.02005643	8.84145260	-0.17732799		29.00000000	1.18413793	10.46949939	0.639867
30	-0.00991853	8.85170270	-0.08779591		30.00000000	1.14466667	10.13224902	0.661256
31	-0.00064475	8.84785460	-0.00570464		31.00000000	1.10774194	9.80113958	0.682846
32	0.00950039	8.84325220	0.08401430		32.00000000	1.07312500	9.48991502	0.704250
33	0.01932094	8.85453320	0.17107791		33.00000000	1.04060606	9.21408091	0.725626
34	0.02946823	8.84768580	0.26072560		34.00000000	1.01000000	8.93616266	0.747002
35	0.03931036	8.84620090	0.34774736		35.00000000	0.98114286	8.67938683	0.768476
36	0.04943011	8.84661960	0.43728938		36.00000000	0.95388889	8.43869214	0.789851
37	0.05925439	8.85093210	0.52445655		37.00000000	0.92810811	8.21462185	0.811241
38	0.06941582	8.84458160	0.61395384		38.00000000	0.90368421	7.99270874	0.832602
39	0.07957724	8.85720350	0.70483178		39.00000000	0.88051282	7.79888124	0.854085
40	0.08935761	8.85078050	0.79088457		40.00000000	0.85850000	7.59839506	0.875468
41	0.09951159	8.84309670	0.87999058		41.00000000	0.83756098	7.40663270	0.896868
42	0.10935298	8.85609050	0.96843989		42.00000000	0.81761905	7.24090828	0.918355
43	0.11946454	8.84496590	1.05665978		43.00000000	0.79860465	7.06363091	0.939735
44	0.12933794	8.84588050	1.14410796		44.00000000	0.78045455	6.90380764	0.961096
45	0.13947555	8.84952350	1.23429216		45.00000000	0.76311111	6.75316971	0.982474
46	0.14929536	8.85163310	1.32150775		46.00000000	0.74652174	6.60793654	1.003952
47	0.15944710	8.85073850	1.41122459		47.00000000	0.73063830	6.46668851	1.025333
48	0.16959216	8.84920120	1.50075515		48.00000000	0.71541667	6.33086603	1.046667
49	0.17940825	8.85213850	1.58814668		49.00000000	0.70081633	6.20372319	1.068048
50	0.18956596	8.84716220	1.67712080		50.00000000	0.68680000	6.07623100	1.089523
51	0.19931284	8.85885720	1.76568399		51.00000000	0.67333333	5.96496385	1.110917
52	0.20947500	8.84143640	1.85205989		52.00000000	0.66038462	5.83874858	1.132284
53	0.21928886	8.86150460	1.94322924		53.00000000	0.64792453	5.74158619	1.153663
54	0.22943987	8.84572030	2.02956092		54.00000000	0.63592593	5.62522287	1.175142
55	0.23928647	8.84643080	2.11683120		55.00000000	0.62436364	5.52338970	1.196538
56	0.24941365	8.85813520	2.20933983		56.00000000	0.61321429	5.43193505	1.217883
57	0.25958103	8.84489250	2.29596631		57.00000000	0.60245614	5.32865980	1.239252
58	0.26937479	8.85188290	2.38447410		58.00000000	0.59206897	5.24092515	1.260745
59	0.27953100	8.83952520	2.47092132		59.00000000	0.58203390	5.14490331	1.282132
60	0.28936124	8.85340210	2.56183141		60.00000000	0.57233333	5.06709714	1.303496
61	0.29949960	8.84963230	2.65046133		61.00000000	0.56295082	4.98190776	1.324881
62	0.30931345	8.84928990	2.73720439		62.00000000	0.55387097	4.90136476	1.346365
63	0.31944063	8.83192540	2.82127581		63.00000000	0.54507937	4.81410029	1.367774
64	0.32926938	8.86564350	2.91918494		64.00000000	0.53656250	4.75697184	1.389145
65	0.33940551	8.84426980	3.00179390		65.00000000	0.52830769	4.67249577	1.410514
66	0.34923425	8.84552960	3.08916190		66.00000000	0.52030303	4.60235586	1.431989
67	0.35938972	8.84968850	3.18048707		67.00000000	0.51253731	4.53579557	1.453374
68	0.36955115	8.85119440	3.27096907		68.00000000	0.50500000	4.46985317	1.474757
69	0.37938732	8.84154990	3.35437192		69.00000000	0.49768116	4.40027281	1.496135
70	0.38951230	8.85342690	3.44851867		70.00000000	0.49057143	4.34323828	1.517623
71	0.39937451	8.83681680	3.52919938		71.00000000	0.48366197	4.27403224	1.539001
72	0.40949652	8.84333230	3.62131380		72.00000000	0.47694444	4.21777821	1.560390
73	0.41933790	8.83673950	3.70557978		73.00000000	0.47041096	4.15689910	1.581876
74	0.42946061	8.82544990	3.79018310		74.00000000	0.46405405	4.09548580	1.603280
75	0.43928340	8.83155820	3.87955691		75.00000000	0.45786667	4.04367611	1.624646
76	0.44942921	8.82167820	3.96471986		76.00000000	0.45184211	3.98600565	1.646019
77	0.45957351	8.82608600	4.05623532		77.00000000	0.44597403	3.93620511	1.667505
78	0.46946254	8.81816390	4.13979762		78.00000000	0.44025641	3.88225318	1.688883
79	0.47958153	8.79288200	4.21690380		79.00000000	0.43468354	3.82212111	1.710241
80	0.48939615	8.79081730	4.30219214		80.00000000	0.42925000	3.77345833	1.731621
81	0.49950844	8.76364990	4.37751709		81.00000000	0.42395062	3.71535478	1.753110
82	0.50934464	8.73043920	4.44680241		82.00000000	0.41878049	3.65613759	1.774483
83	0.51948893	8.68925950	4.51397412		83.00000000	0.41373494	3.59505026	1.795845
84	0.52925593	8.62979220	4.56736870		84.00000000	0.40880952	3.52794124	1.817221
85	0.53938085	8.54691790	4.61004384		85.00000000	0.40400000	3.45295483	1.838703
86	0.54952818	8.41386800	4.62365757		86.00000000	0.39930233	3.35967706	1.860143
87	0.55935246	8.25378130	4.61677287		87.00000000	0.39471264	3.25787184	1.881501
88	0.56946993	7.99945970	4.55545176		88.00000000	0.39022727	3.12160734	1.902884
89	0.57927561	7.69331360	4.45654893		89.00000000	0.38584270	2.96840887	1.924378
90	0.58941841	7.23388000	4.26378205		90.00000000	0.38155556	2.76012710	1.945762
91	0.59917724	6.67448900	3.99920190		91.00000000	0.37736264	2.51870277	1.967125
92	0.60929769	5.89463420	3.59158700		92.00000000	0.37326087	2.20023629	1.988602
93	0.61908996	4.97520450	3.08009915		93.00000000	0.36924731	1.83708089	2.010120
94	0.62921196	3.80191730	2.39221184		94.00000000	0.36531915	1.38891319	2.031519
95	0.63931459	2.36725140	1.51341836		95.00000000	0.36147368	0.85569909	2.052920
96	0.64908975	0.74120897	0.48111115		96.00000000	0.35770833	0.26513663	2.074287
97	0.65917081	-1.24619670	-0.82145649		97.00000000	0.35402062	-0.44117933	2.095764
98	0.66892582	-3.45222880	-2.30928498		98.00000000	0.35040816	-1.20968915	2.117208
99	0.67904633	-6.13431120	-4.16548151		99.00000000	0.34686869	-2.12780047	2.138609
100	0.68895918	-9.12731840	-6.28834980		100.00000000	0.34340000	-3.13432114	2.159983
101	0.69154477	-10.00010700	-6.91552170		101.00000000	0.34000000	-3.40003638	2.181455
15:56 02/04/2018
Test Lot:	JK-PERC
Recipe:	Recipe_YJX-LID
Cell Name:	1-5-2h
Test Order:	4
Test Condition:	Light
1	-0.29990926	8.86047650	-2.65733895		1.00000000	34.34000000	304.26876301	0.000000
2	-0.29008248	8.86452580	-2.57144363		2.00000000	17.17000000	152.20390799	0.061768
3	-0.27996024	8.84436040	-2.47606926		3.00000000	11.44666667	101.23844538	0.083278
4	-0.27012303	8.85704040	-2.39249059		4.00000000	8.58500000	76.03769183	0.104715
5	-0.25997549	8.83938410	-2.29802321		5.00000000	6.86800000	60.70889000	0.126091
6	-0.24978550	8.85307880	-2.21137071		6.00000000	5.72333333	50.66912100	0.147486
7	-0.23996021	8.84898660	-2.12340468		7.00000000	4.90571429	43.41059998	0.168939
8	-0.22982456	8.85142140	-2.03427403		8.00000000	4.29250000	37.99472636	0.190406
9	-0.21998140	8.85255150	-1.94739667		9.00000000	3.81555556	33.77740206	0.211777
10	-0.20984799	8.85790350	-1.85881325		10.00000000	3.43400000	30.41804062	0.233157
11	-0.20002195	8.84846590	-1.76988740		11.00000000	3.12181818	27.62330173	0.254500
12	-0.18989076	8.85178180	-1.68087157		12.00000000	2.86166667	25.33084892	0.275993
13	-0.18009673	8.85219380	-1.59425116		13.00000000	2.64153846	23.38341039	0.297371
14	-0.16994694	8.85816380	-1.50541783		14.00000000	2.45285714	21.72781035	0.318737
15	-0.16011792	8.84672360	-1.41651898		15.00000000	2.28933333	20.25309923	0.340097
16	-0.14998227	8.85659500	-1.32833222		16.00000000	2.14625000	19.00846702	0.361574
17	-0.13983248	8.85186390	-1.23777808		17.00000000	2.02000000	17.88076508	0.382951
18	-0.13000570	8.84951590	-1.15048751		18.00000000	1.90777778	16.88290978	0.404327
19	-0.11989015	8.84092900	-1.05994030		19.00000000	1.80736842	15.97881589	0.425705
20	-0.11004848	8.85867310	-0.97488351		20.00000000	1.71700000	15.21034171	0.447176
21	-0.09988380	8.84969620	-0.88394130		21.00000000	1.63523810	14.47136036	0.468557
22	-0.09007265	8.85908030	-0.79796087		22.00000000	1.56090909	13.82821898	0.489940
23	-0.07994072	8.83859630	-0.70656376		23.00000000	1.49304348	13.19640856	0.511427
24	-0.07013553	8.85589890	-0.62111313		24.00000000	1.43083333	12.67131534	0.532828
25	-0.05998052	8.85218050	-0.53095842		25.00000000	1.37360000	12.15935513	0.554185
26	-0.04982924	8.84872630	-0.44092528		26.00000000	1.32076923	11.68712543	0.575562
27	-0.04000544	8.84823890	-0.35397767		27.00000000	1.27185185	11.25364903	0.597031
28	-0.02986160	8.85204890	-0.26433632		28.00000000	1.22642857	10.85640569	0.618400
29	-0.02002589	8.84613420	-0.17715171		29.00000000	1.18413793	10.47504305	0.639743
30	-0.00990438	8.84025670	-0.08755724		30.00000000	1.14466667	10.11914717	0.661121
31	-0.00064475	8.85536480	-0.00570945		31.00000000	1.10774194	9.80945894	0.682726
32	0.00947730	8.84733770	0.08384891		32.00000000	1.07312500	9.49429927	0.704102
33	0.01932390	8.85401340	0.17109404		33.00000000	1.04060606	9.21354000	0.725455
34	0.02946149	8.85377600	0.26084547		34.00000000	1.01000000	8.94231376	0.746835
35	0.03930213	8.84461400	0.34761220		35.00000000	0.98114286	8.67782985	0.768316
36	0.04944345	8.84727570	0.43743983		36.00000000	0.95388889	8.43931799	0.789716
37	0.05925581	8.85420320	0.52466294		37.00000000	0.92810811	8.21765778	0.811065
38	0.06940159	8.83776000	0.61335461		38.00000000	0.90368421	7.98654417	0.832441
39	0.07954217	8.86180880	0.70488748		39.00000000	0.88051282	7.80293626	0.853924
40	0.08935527	8.84046360	0.78994199		40.00000000	0.85850000	7.58953800	0.875308
41	0.09951743	8.84760950	0.88049133		41.00000000	0.83756098	7.41041244	0.896669
42	0.10937443	8.86199860	0.96927605		42.00000000	0.81761905	7.24573886	0.918041
43	0.11950608	8.84203240	1.05667663		43.00000000	0.79860465	7.06128820	0.939508
44	0.12929760	8.85014150	1.14430206		44.00000000	0.78045455	6.90713316	0.960884
45	0.13947241	8.84804060	1.23405755		45.00000000	0.76311111	6.75203809	0.982239
46	0.14927806	8.85686680	1.32213589		46.00000000	0.74652174	6.61184361	1.003604
47	0.15944022	8.83998300	1.40944883		47.00000000	0.73063830	6.45883013	1.025082
48	0.16959196	8.85301880	1.50140081		48.00000000	0.71541667	6.33359720	1.046463
49	0.17939390	8.84894180	1.58744618		49.00000000	0.70081633	6.20148289	1.067856
50	0.18955159	8.84469890	1.67652674		50.00000000	0.68680000	6.07453920	1.089214
51	0.19933864	8.84686850	1.76352274		51.00000000	0.67333333	5.95689146	1.110695
52	0.20946507	8.86003110	1.85586703		52.00000000	0.66038462	5.85102823	1.132079
53	0.21926925	8.85354230	1.94130958		53.00000000	0.64792453	5.73642722	1.153461
54	0.22944555	8.84641840	2.02977134		54.00000000	0.63592593	5.62566681	1.174952
55	0.23926534	8.85059740	2.11764120		55.00000000	0.62436364	5.52599118	1.196341
56	0.24940741	8.85949040	2.20962255		56.00000000	0.61321429	5.43276608	1.217700
57	0.25953680	8.84533690	2.29569043		57.00000000	0.60245614	5.32892753	1.239070
58	0.26938191	8.84632300	2.38303939		58.00000000	0.59206897	5.23763331	1.260549
59	0.27951655	8.85113430	2.47403852		59.00000000	0.58203390	5.15166020	1.281935
60	0.28933707	8.84426020	2.55897233		60.00000000	0.57233333	5.06186492	1.303282
61	0.29949850	8.83494280	2.64605212		61.00000000	0.56295082	4.97363829	1.324675
62	0.30930936	8.84997460	2.73737998		62.00000000	0.55387097	4.90174400	1.346161
63	0.31944919	8.84400180	2.82520921		63.00000000	0.54507937	4.82068289	1.367552
64	0.32926080	8.84661010	2.91284192		64.00000000	0.53656250	4.74675923	1.388922
65	0.33941031	8.84648320	3.00258761		65.00000000	0.52830769	4.67366512	1.410290
66	0.34922713	8.83498290	3.08541572		66.00000000	0.52030303	4.59686838	1.431763
67	0.35936770	8.84653000	3.17915714		67.00000000	0.51253731	4.53417672	1.453133
68	0.36955070	8.83484940	3.26492478		68.00000000	0.50500000	4.46159895	1.474477
69	0.37937275	8.85318850	3.35865847		69.00000000	0.49768116	4.40606512	1.495851
70	0.38951331	8.84014990	3.44335605		70.00000000	0.49057143	4.33672497	1.517335
71	0.39932045	8.83833890	3.52932947		71.00000000	0.48366197	4.27476842	1.538713
72	0.40947145	8.83903030	3.61933055		72.00000000	0.47694444	4.21572640	1.560080
73	0.41931731	8.83276370	3.70373071		73.00000000	0.47041096	4.15502884	1.581458
74	0.42946234	8.84158710	3.79712869		74.00000000	0.46405405	4.10297434	1.602940
75	0.43930745	8.83097270	3.87951210		75.00000000	0.45786667	4.04340803	1.624319
76	0.44945174	8.82728290	3.96743766		76.00000000	0.45184211	3.98853809	1.645681
77	0.45958039	8.81448270	4.05096340		77.00000000	0.44597403	3.93103034	1.667052
78	0.46942922	8.81263830	4.13690992		78.00000000	0.44025641	3.87982050	1.688526
79	0.47957948	8.79159930	4.21627062		79.00000000	0.43468354	3.82156354	1.709902
80	0.48940077	8.77925590	4.29657460		80.00000000	0.42925000	3.76849560	1.731288
81	0.49952424	8.77990530	4.38577552		81.00000000	0.42395062	3.72224627	1.752643
82	0.50934106	8.72981740	4.44645445		82.00000000	0.41878049	3.65587719	1.774122
83	0.51947272	8.68604950	4.51216576		83.00000000	0.41373494	3.59372217	1.795511
84	0.52925605	8.63257980	4.56884509		84.00000000	0.40880952	3.52908084	1.816897
85	0.53937948	8.53491400	4.60355748		85.00000000	0.40400000	3.44810526	1.838376
86	0.54953641	8.41062640	4.62194544		86.00000000	0.39930233	3.35838268	1.859772
87	0.55934280	8.25633720	4.61812277		87.00000000	0.39471264	3.25888068	1.881125
88	0.56947744	7.99495410	4.55294599		88.00000000	0.39022727	3.11984913	1.902491
89	0.57927418	7.70189520	4.46150903		89.00000000	0.38584270	2.97172001	1.923982
90	0.58939761	7.22369480	4.25762845		90.00000000	0.38155556	2.75624088	1.945361
91	0.59918690	6.67722800	4.00090755		91.00000000	0.37736264	2.51973637	1.966716
92	0.60931259	5.90464740	3.59777600		92.00000000	0.37326087	2.20397382	1.988187
93	0.61910486	4.97995810	3.08311626		93.00000000	0.36924731	1.83883614	2.009701
94	0.62919337	3.79132600	2.38547718		94.00000000	0.36531915	1.38504399	2.031152
95	0.63930565	2.37287690	1.51699361		95.00000000	0.36147368	0.85773256	2.052525
96	0.64910680	0.72592825	0.47120496		96.00000000	0.35770833	0.25967058	2.073918
97	0.65914989	-1.25567530	-0.82767824		97.00000000	0.35402062	-0.44453495	2.095382
98	0.66889900	-3.48175020	-2.32893923		98.00000000	0.35040816	-1.22003369	2.116760
99	0.67902917	-6.17281630	-4.19152233		99.00000000	0.34686869	-2.14115668	2.138101
100	0.68897474	-9.20517350	-6.34213202		100.00000000	0.34340000	-3.16105658	2.159484
101	0.69132882	-10.00013000	-6.91337807		101.00000000	0.34000000	-3.40004420	2.180967
