# Supplementary material for: Study on the Electrical Injection Regeneration of Industrialized B-Doped Czochralski Silicon PERC Solar Cells
Source: Hindawi journal article supplement (doi:10.1155/2019/5357370), 2019-06-20
Supplement: f1 [file 5357370.f1.zip › section3.2/IVRawData_1-5-3h.csv]

17:18 02/04/2018
Test Lot:	JK-PERC
Recipe:	Recipe_YJX-LID
Cell Name:	1-5-3h
Test Order:	2
Test Condition:	Light
1	-0.29991138	8.84959700	-2.65409485		1.00000000	34.34000000	303.89516098	0.000000
2	-0.29006219	8.84596540	-2.56588010		2.00000000	17.17000000	151.88522592	0.021500
3	-0.27996960	8.84775260	-2.47710176		3.00000000	11.44666667	101.27727476	0.042868
4	-0.27015391	8.85159590	-2.39129324		4.00000000	8.58500000	75.99095080	0.064260
5	-0.26001441	8.83782960	-2.29796305		5.00000000	6.86800000	60.69821369	0.085775
6	-0.24987569	8.84530640	-2.21022704		6.00000000	5.72333333	50.62463696	0.107177
7	-0.24005479	8.85392950	-2.12542819		7.00000000	4.90571429	43.43484843	0.128531
8	-0.22985503	8.84286500	-2.03257700		8.00000000	4.29250000	37.95799801	0.149904
9	-0.22007506	8.84369950	-1.94627770		9.00000000	3.81555556	33.74362676	0.171388
10	-0.20991771	8.84204860	-1.85610259		10.00000000	3.43400000	30.36359489	0.192770
11	-0.20009084	8.85733700	-1.77227200		11.00000000	3.12181818	27.65099569	0.214122
12	-0.18995436	8.83981700	-1.67916178		12.00000000	2.86166667	25.29660965	0.235503
13	-0.18015726	8.84256740	-1.59305271		13.00000000	2.64153846	23.35798189	0.256999
14	-0.16997834	8.82915310	-1.50076479		14.00000000	2.45285714	21.65665125	0.278378
15	-0.16018124	8.85352710	-1.41816895		15.00000000	2.28933333	20.26867471	0.299745
16	-0.15004474	8.83866410	-1.32619506		16.00000000	2.14625000	18.96998282	0.321125
17	-0.13991271	8.85359380	-1.23873030		17.00000000	2.02000000	17.88425948	0.342599
18	-0.13006501	8.84145930	-1.14996449		18.00000000	1.90777778	16.86753958	0.363990
19	-0.11996275	8.84006400	-1.06047839		19.00000000	1.80736842	15.97725251	0.385337
20	-0.11010015	8.84877110	-0.97425103		20.00000000	1.71700000	15.19333998	0.406718
21	-0.09998375	8.85172270	-0.88502845		21.00000000	1.63523810	14.47467417	0.428204
22	-0.09014796	8.85866740	-0.79859077		22.00000000	1.56090909	13.82757448	0.449570
23	-0.07997869	8.83756260	-0.70681668		23.00000000	1.49304348	13.19486520	0.470955
24	-0.07015944	8.83097360	-0.61957619		24.00000000	1.43083333	12.63565139	0.532655
25	-0.06000229	8.85052300	-0.53105167		25.00000000	1.37360000	12.15707839	0.554053
26	-0.04986971	8.84329510	-0.44101255		26.00000000	1.32076923	11.67995207	0.575415
27	-0.04007130	8.85442830	-0.35480846		27.00000000	1.27185185	11.26152103	0.596894
28	-0.02987099	8.83873560	-0.26402176		28.00000000	1.22642857	10.84007788	0.618261
29	-0.02005993	8.85090350	-0.17754849		29.00000000	1.18413793	10.48069056	0.639637
30	-0.00993627	8.84773450	-0.08791351		30.00000000	1.14466667	10.12770676	0.661000
31	-0.00070054	8.84419630	-0.00619572		31.00000000	1.10774194	9.79708713	0.682588
32	0.00948617	8.86136720	0.08406044		32.00000000	1.07312500	9.50935468	0.703968
33	0.01930811	8.84095000	0.17070206		33.00000000	1.04060606	9.19994615	0.725353
34	0.02945232	8.84188940	0.26041414		34.00000000	1.01000000	8.93030829	0.746837
35	0.03928840	8.84595490	0.34754343		35.00000000	0.98114286	8.67914546	0.768227
36	0.04942145	8.82716660	0.43625133		36.00000000	0.95388889	8.42013614	0.789570
37	0.05924339	8.84837150	0.52420751		37.00000000	0.92810811	8.21224533	0.810940
38	0.06937866	8.83394430	0.61288721		38.00000000	0.90368421	7.98309598	0.832432
39	0.07951766	8.85156250	0.70385549		39.00000000	0.88051282	7.79391426	0.853817
40	0.08936788	8.84861180	0.79078169		40.00000000	0.85850000	7.59653323	0.875158
41	0.09948976	8.83960340	0.87944999		41.00000000	0.83756098	7.40370685	0.896545
42	0.10933254	8.84911060	0.96749574		42.00000000	0.81761905	7.23520138	0.918024
43	0.11944549	8.83907130	1.05578720		43.00000000	0.79860465	7.05892345	0.939392
44	0.12932324	8.85138420	1.14468968		44.00000000	0.78045455	6.90810303	0.960749
45	0.13946225	8.82834530	1.23122090		45.00000000	0.76311111	6.73700839	0.982132
46	0.14925665	8.85035900	1.32097494		46.00000000	0.74652174	6.60698539	1.003610
47	0.15940756	8.84341810	1.40970770		47.00000000	0.73063830	6.46133995	1.025006
48	0.16954358	8.84217170	1.49913344		48.00000000	0.71541667	6.32583700	1.046355
49	0.17936701	8.85943600	1.58909055		49.00000000	0.70081633	6.20883739	1.067728
50	0.18951865	8.84494690	1.67628240		50.00000000	0.68680000	6.07470953	1.089223
51	0.19928850	8.84474180	1.76265533		51.00000000	0.67333333	5.95545948	1.110625
52	0.20946024	8.83404730	1.85038167		52.00000000	0.66038462	5.83386893	1.132003
53	0.21925986	8.84877590	1.94018137		53.00000000	0.64792453	5.73333895	1.153382
54	0.22943011	8.84351350	2.02896828		54.00000000	0.63592593	5.62381951	1.174867
55	0.23924610	8.84104540	2.11518563		55.00000000	0.62436364	5.52002726	1.196259
56	0.24939030	8.83928110	2.20443097		56.00000000	0.61321429	5.42037345	1.217629
57	0.25953823	8.83044150	2.29183716		57.00000000	0.60245614	5.31995370	1.239004
58	0.26933339	8.85331150	2.38449240		58.00000000	0.59206897	5.24177098	1.260483
59	0.27951330	8.82389070	2.46639481		59.00000000	0.58203390	5.13580350	1.281858
60	0.28931293	8.85098170	2.56070345		60.00000000	0.57233333	5.06571186	1.303238
61	0.29947647	8.83464340	2.64576782		61.00000000	0.56295082	4.97346974	1.324593
62	0.30929992	8.84409430	2.73547766		62.00000000	0.55387097	4.89848707	1.346074
63	0.31945530	8.82544800	2.81933614		63.00000000	0.54507937	4.81056959	1.367456
64	0.32926086	8.84830860	2.91340170		64.00000000	0.53656250	4.74767058	1.388837
65	0.33940729	8.83290100	2.99795099		65.00000000	0.52830769	4.66648954	1.410316
66	0.34922776	8.84632590	3.08938258		66.00000000	0.52030303	4.60277017	1.431708
67	0.35940099	8.83015060	3.17356487		67.00000000	0.51253731	4.52578167	1.453066
68	0.36953476	8.84265420	3.26766810		68.00000000	0.50500000	4.46554037	1.474443
69	0.37935150	8.83730220	3.35244385		69.00000000	0.49768116	4.39815881	1.495935
70	0.38949868	8.83583350	3.44154548		70.00000000	0.49057143	4.33460746	1.517305
71	0.39936528	8.82896900	3.52598368		71.00000000	0.48366197	4.27023656	1.538645
72	0.40950873	8.83395770	3.61758280		72.00000000	0.47694444	4.21330705	1.560027
73	0.41929048	8.82444480	3.70000570		73.00000000	0.47041096	4.15111554	1.581503
74	0.42942652	8.82464500	3.78953659		74.00000000	0.46405405	4.09511229	1.602886
75	0.43925366	8.82626250	3.87696811		75.00000000	0.45786667	4.04125139	1.624246
76	0.44943509	8.82548140	3.96648103		76.00000000	0.45184211	3.98772410	1.645623
77	0.45957705	8.80523400	4.04668347		77.00000000	0.44597403	3.92690566	1.667098
78	0.46940643	8.80911450	4.13505499		78.00000000	0.44025641	3.87826913	1.688473
79	0.47954395	8.77963830	4.21022243		79.00000000	0.43468354	3.81636429	1.709814
80	0.48938376	8.78204350	4.29778947		80.00000000	0.42925000	3.76969217	1.731202
81	0.49950564	8.74019910	4.36577875		81.00000000	0.42395062	3.70541280	1.752692
82	0.50931269	8.73307510	4.44786597		82.00000000	0.41878049	3.65724145	1.774071
83	0.51946211	8.67231270	4.50493785		83.00000000	0.41373494	3.58803877	1.795433
84	0.52925801	8.61715600	4.56069884		84.00000000	0.40880952	3.52277544	1.816817
85	0.53938580	8.52619650	4.59890932		85.00000000	0.40400000	3.44458339	1.838304
86	0.54950547	8.40030570	4.61601393		86.00000000	0.39930233	3.35426160	1.859700
87	0.55933708	8.22785280	4.60214316		87.00000000	0.39471264	3.24763753	1.881075
88	0.56944406	7.98342560	4.54611429		88.00000000	0.39022727	3.11535040	1.902432
89	0.57924074	7.66546580	4.44015008		89.00000000	0.38584270	2.95766400	1.923925
90	0.58938569	7.20039840	4.24381178		90.00000000	0.38155556	2.74735201	1.945302
91	0.59919643	6.63282920	3.97436758		91.00000000	0.37736264	2.50298192	1.966691
92	0.60928857	5.87997720	3.58260290		92.00000000	0.37326087	2.19476540	1.988199
93	0.61909264	4.94595340	3.06200335		93.00000000	0.36924731	1.82628000	2.009710
94	0.62921822	3.77775480	2.37703215		94.00000000	0.36531915	1.38008617	2.031117
95	0.63933194	2.33549280	1.49315514		95.00000000	0.36147368	0.84421919	2.052503
96	0.64909285	0.70969993	0.46066115		96.00000000	0.35770833	0.25386558	2.073988
97	0.65916038	-1.27744830	-0.84204331		97.00000000	0.35402062	-0.45224304	2.095388
98	0.66893989	-3.47095230	-2.32185845		98.00000000	0.35040816	-1.21625002	2.116740
99	0.67900151	-6.15467410	-4.17903301		99.00000000	0.34686869	-2.13486372	2.138115
100	0.68896264	-9.15378380	-6.30661505		100.00000000	0.34340000	-3.14340936	2.159595
101	0.69152433	-9.99979210	-6.91509953		101.00000000	0.34000000	-3.39992931	2.180981
17:19 02/04/2018
Test Lot:	JK-PERC
Recipe:	Recipe_YJX-LID
Cell Name:	1-5-3h
Test Order:	3
Test Condition:	Light
1	-0.29993546	8.84102250	-2.65173615		1.00000000	34.34000000	303.60071265	0.000000
2	-0.29013464	8.84454920	-2.56611010		2.00000000	17.17000000	151.86090976	0.061733
3	-0.27998400	8.84282880	-2.47585058		3.00000000	11.44666667	101.22091366	0.083265
4	-0.27016604	8.84041210	-2.38837913		4.00000000	8.58500000	75.89493788	0.104663
5	-0.26001987	8.85037520	-2.30127341		5.00000000	6.86800000	60.78437687	0.126010
6	-0.24987815	8.83296870	-2.20716588		6.00000000	5.72333333	50.55402419	0.147383
7	-0.24006096	8.85179040	-2.12496930		7.00000000	4.90571429	43.42435462	0.168867
8	-0.22992073	8.84788510	-2.03431220		8.00000000	4.29250000	37.97954679	0.190259
9	-0.22008269	8.84872630	-1.94745149		9.00000000	3.81555556	33.76280679	0.211677
10	-0.20993426	8.83785340	-1.85536821		10.00000000	3.43400000	30.34918858	0.233060
11	-0.20013493	8.84487150	-1.77016774		11.00000000	3.12181818	27.61208066	0.254566
12	-0.19000141	8.84149360	-1.67989625		12.00000000	2.86166667	25.30140752	0.275963
13	-0.18018346	8.84014130	-1.59284725		13.00000000	2.64153846	23.35157325	0.297315
14	-0.17004845	8.83831790	-1.50294226		14.00000000	2.45285714	21.67913119	0.318700
15	-0.16021860	8.85210420	-1.41827174		15.00000000	2.28933333	20.26541722	0.340177
16	-0.15007465	8.84085940	-1.32678888		16.00000000	2.14625000	18.97469449	0.361553
17	-0.13993219	8.85236070	-1.23873022		17.00000000	2.02000000	17.88176861	0.382893
18	-0.13011424	8.83528520	-1.14959642		18.00000000	1.90777778	16.85576076	0.404269
19	-0.11995094	8.84264660	-1.06068377		19.00000000	1.80736842	15.98192022	0.425750
20	-0.11013746	8.84117980	-0.97374509		20.00000000	1.71700000	15.18030572	0.447126
21	-0.09995481	8.85242750	-0.88484274		21.00000000	1.63523810	14.47582668	0.468519
22	-0.09015176	8.84518530	-0.79740900		22.00000000	1.56090909	13.80653015	0.489863
23	-0.07998474	8.84860130	-0.70775307		23.00000000	1.49304348	13.21134646	0.511325
24	-0.07015563	8.84626290	-0.62061513		24.00000000	1.43083333	12.65752783	0.532692
25	-0.06003773	8.84037210	-0.53075586		25.00000000	1.37360000	12.14313512	0.554070
26	-0.04988485	8.84999280	-0.44148058		26.00000000	1.32076923	11.68879818	0.575474
27	-0.04005202	8.84369950	-0.35420802		27.00000000	1.27185185	11.24787559	0.596946
28	-0.02989170	8.84327890	-0.26434064		28.00000000	1.22642857	10.84564991	0.618309
29	-0.02009683	8.85371300	-0.17793154		29.00000000	1.18413793	10.48401739	0.639698
30	-0.00993279	8.84197430	-0.08782543		30.00000000	1.14466667	10.12111325	0.661182
31	-0.00066934	8.84237480	-0.00591852		31.00000000	1.10774194	9.79506938	0.682684
32	0.00947515	8.84282020	0.08378702		32.00000000	1.07312500	9.48945143	0.704058
33	0.01930100	8.84265520	0.17067210		33.00000000	1.04060606	9.20172059	0.725444
34	0.02944987	8.84102440	0.26036699		34.00000000	1.01000000	8.92943464	0.746927
35	0.03926828	8.84629820	0.34737890		35.00000000	0.98114286	8.67948229	0.768311
36	0.04943873	8.84465410	0.43726843		36.00000000	0.95388889	8.43681727	0.789696
37	0.05924002	8.84107590	0.52374552		37.00000000	0.92810811	8.20547423	0.811078
38	0.06935986	8.85482790	0.61416963		38.00000000	0.90368421	8.00196816	0.832553
39	0.07949384	8.83675190	0.70246737		39.00000000	0.88051282	7.78087334	0.853920
40	0.08929662	8.84220410	0.78957897		40.00000000	0.85850000	7.59103222	0.875276
41	0.09948865	8.84000490	0.87948018		41.00000000	0.83756098	7.40404313	0.896653
42	0.10930558	8.84277150	0.96656427		42.00000000	0.81761905	7.23001841	0.918127
43	0.11939937	8.83982470	1.05546950		43.00000000	0.79860465	7.05952512	0.939528
44	0.12924309	8.84010310	1.14252224		44.00000000	0.78045455	6.89929865	0.960889
45	0.13941279	8.85373970	1.23432455		45.00000000	0.76311111	6.75638714	0.982260
46	0.14925130	8.82757000	1.31752630		46.00000000	0.74652174	6.58997291	1.003751
47	0.15937039	8.84598260	1.40978770		47.00000000	0.73063830	6.46321367	1.025134
48	0.16952893	8.84236810	1.49903720		48.00000000	0.71541667	6.32597751	1.046473
49	0.17935479	8.84553910	1.58648981		49.00000000	0.70081633	6.19909822	1.067855
50	0.18949249	8.84369660	1.67581409		50.00000000	0.68680000	6.07385082	1.089337
51	0.19927518	8.83745670	1.76108577		51.00000000	0.67333333	5.95055418	1.110726
52	0.20941958	8.84454920	1.85222178		52.00000000	0.66038462	5.84080422	1.132104
53	0.21922088	8.83850770	1.93758544		53.00000000	0.64792453	5.72668593	1.153451
54	0.22943076	8.84037880	2.02825483		54.00000000	0.63592593	5.62182607	1.174909
55	0.23924024	8.83112140	2.11275960		55.00000000	0.62436364	5.51383107	1.196292
56	0.24939582	8.84982110	2.20710839		56.00000000	0.61321429	5.42683672	1.217685
57	0.25952831	8.83474250	2.29286579		57.00000000	0.60245614	5.32254487	1.239082
58	0.26934522	8.84250160	2.38168554		58.00000000	0.59206897	5.23537077	1.260559
59	0.27948368	8.84784700	2.47282884		59.00000000	0.58203390	5.14974688	1.281920
60	0.28933930	8.83551030	2.55646037		60.00000000	0.57233333	5.05685706	1.303316
61	0.29945838	8.84500980	2.64871231		61.00000000	0.56295082	4.97930552	1.324806
62	0.30925670	8.83484940	2.73223637		62.00000000	0.55387097	4.89336659	1.346178
63	0.31942046	8.84225270	2.82439642		63.00000000	0.54507937	4.81972949	1.367530
64	0.32923886	8.83542350	2.90896476		64.00000000	0.53656250	4.74075692	1.388904
65	0.33939445	8.84072590	3.00049330		65.00000000	0.52830769	4.67062350	1.410367
66	0.34921733	8.83732130	3.08614575		66.00000000	0.52030303	4.59808505	1.431742
67	0.35936171	8.84383680	3.17813632		67.00000000	0.51253731	4.53279635	1.453093
68	0.36951429	8.83035180	3.26294118		68.00000000	0.50500000	4.45932766	1.474483
69	0.37936547	8.84065530	3.35383935		69.00000000	0.49768116	4.39982758	1.495961
70	0.38948828	8.82526020	3.43733542		70.00000000	0.49057143	4.32942050	1.517337
71	0.39929181	8.83425240	3.52744463		71.00000000	0.48366197	4.27279194	1.538699
72	0.40944365	8.83186910	3.61615272		72.00000000	0.47694444	4.21231090	1.560076
73	0.41926429	8.82706260	3.70087213		73.00000000	0.47041096	4.15234698	1.581563
74	0.42943102	8.82849600	3.79123004		74.00000000	0.46405405	4.09689936	1.602951
75	0.43921816	8.80678080	3.86809806		75.00000000	0.45786667	4.03233137	1.624301
76	0.44938490	8.83331110	3.96955663		76.00000000	0.45184211	3.99126188	1.645666
77	0.45954642	8.79852680	4.04333149		77.00000000	0.44597403	3.92391442	1.667148
78	0.46937674	8.79734710	4.12927010		78.00000000	0.44025641	3.87308845	1.688577
79	0.47955090	8.78667160	4.21365627		79.00000000	0.43468354	3.81942155	1.709932
80	0.48936561	8.78838160	4.30073172		80.00000000	0.42925000	3.77241280	1.731308
81	0.49947354	8.74521830	4.36800514		81.00000000	0.42395062	3.70754070	1.752791
82	0.50929046	8.73104000	4.44663538		82.00000000	0.41878049	3.65638919	1.774173
83	0.51946986	8.68138310	4.50971686		83.00000000	0.41373494	3.59179151	1.795581
84	0.52919298	8.61873720	4.56097522		84.00000000	0.40880952	3.52342185	1.816948
85	0.53936714	8.52432440	4.59774047		85.00000000	0.40400000	3.44382706	1.838425
86	0.54950261	8.39950560	4.61555025		86.00000000	0.39930233	3.35394212	1.859800
87	0.55933589	8.23106580	4.60393051		87.00000000	0.39471264	3.24890574	1.881178
88	0.56945127	7.98454050	4.54680673		88.00000000	0.39022727	3.11578546	1.902532
89	0.57925409	7.66224580	4.43838722		89.00000000	0.38584270	2.95642158	1.923999
90	0.58936721	7.19922780	4.24298880		90.00000000	0.38155556	2.74690536	1.945372
91	0.59917819	6.65566970	3.98793212		91.00000000	0.37736264	2.51160107	1.966765
92	0.60928535	5.87516210	3.57965020		92.00000000	0.37326087	2.19296811	1.988313
93	0.61907697	4.95897820	3.06998920		93.00000000	0.36924731	1.83108937	2.009704
94	0.62919533	3.77186110	2.37323739		94.00000000	0.36531915	1.37793309	2.031065
95	0.63931590	2.34035470	1.49622597		95.00000000	0.36147368	0.84597664	2.052436
96	0.64905840	0.71356606	0.46314605		96.00000000	0.35770833	0.25524853	2.073911
97	0.65913880	-1.26942920	-0.83673004		97.00000000	0.35402062	-0.44940411	2.095303
98	0.66893190	-3.48788860	-2.33315995		98.00000000	0.35040816	-1.22218464	2.116648
99	0.67897958	-6.16114660	-4.18329273		99.00000000	0.34686869	-2.13710883	2.138026
100	0.68893492	-9.16566750	-6.31454841		100.00000000	0.34340000	-3.14749022	2.159514
101	0.69142300	-10.00019600	-6.91436552		101.00000000	0.34000000	-3.40006664	2.180898
17:19 02/04/2018
Test Lot:	JK-PERC
Recipe:	Recipe_YJX-LID
Cell Name:	1-5-3h
Test Order:	4
Test Condition:	Light
1	-0.29997164	8.83566950	-2.65045027		1.00000000	34.34000000	303.41689063	0.000000
2	-0.29015520	8.84424780	-2.56620449		2.00000000	17.17000000	151.85573473	0.061719
3	-0.28000456	8.84449480	-2.47649887		3.00000000	11.44666667	101.23998381	0.083244
4	-0.27016431	8.84274770	-2.38899483		4.00000000	8.58500000	75.91498900	0.104703
5	-0.25999653	8.84845640	-2.30056796		5.00000000	6.86800000	60.77119856	0.126079
6	-0.24986228	8.83439350	-2.20738170		6.00000000	5.72333333	50.56217880	0.147469
7	-0.24003989	8.84686090	-2.12359952		7.00000000	4.90571429	43.40017190	0.168953
8	-0.22987139	8.84893420	-2.03411680		8.00000000	4.29250000	37.98405005	0.190366
9	-0.22004005	8.85223480	-1.94784619		9.00000000	3.81555556	33.77619367	0.211725
10	-0.20991100	8.85669610	-1.85911794		10.00000000	3.43400000	30.41389441	0.233097
11	-0.20008563	8.83721160	-1.76819905		11.00000000	3.12181818	27.58816785	0.254572
12	-0.18995285	8.84333320	-1.67981634		12.00000000	2.86166667	25.30667184	0.275957
13	-0.18017437	8.84453010	-1.59355764		13.00000000	2.64153846	23.36316643	0.297306
14	-0.17003191	8.85199450	-1.50512153		14.00000000	2.45285714	21.71267794	0.318684
15	-0.16019537	8.84160420	-1.41638406		15.00000000	2.28933333	20.24137922	0.340163
16	-0.15007228	8.85618880	-1.32906845		16.00000000	2.14625000	19.00759521	0.361547
17	-0.13992015	8.84162240	-1.23712113		17.00000000	2.02000000	17.86007725	0.382896
18	-0.13009849	8.85198780	-1.15163025		18.00000000	1.90777778	16.88762561	0.404280
19	-0.11993594	8.84260750	-1.06054644		19.00000000	1.80736842	15.98184956	0.425749
20	-0.11009195	8.84990500	-0.97430330		20.00000000	1.71700000	15.19528689	0.447134
21	-0.09996142	8.84561160	-0.88421991		21.00000000	1.63523810	14.46468106	0.468489
22	-0.09013902	8.84051990	-0.79687577		22.00000000	1.56090909	13.79924788	0.489857
23	-0.08000550	8.84743880	-0.70784374		23.00000000	1.49304348	13.20961080	0.511332
24	-0.07015482	8.84255410	-0.62034776		24.00000000	1.43083333	12.65222116	0.532700
25	-0.06003470	8.84983160	-0.53129695		25.00000000	1.37360000	12.15612869	0.554049
26	-0.04987736	8.84347530	-0.44108920		26.00000000	1.32076923	11.68019007	0.575433
27	-0.04006687	8.84803960	-0.35451323		27.00000000	1.27185185	11.25339555	0.596918
28	-0.02989986	8.84025760	-0.26432245		28.00000000	1.22642857	10.84194450	0.618301
29	-0.02007671	8.84413430	-0.17756113		29.00000000	1.18413793	10.47267489	0.639700
30	-0.00995882	8.84861850	-0.08812184		30.00000000	1.14466667	10.12871864	0.661052
31	-0.00068347	8.84854700	-0.00604776		31.00000000	1.10774194	9.80190658	0.682691
32	0.00946472	8.83513930	0.08362212		32.00000000	1.07312500	9.48120886	0.704084
33	0.01930471	8.85135080	0.17087272		33.00000000	1.04060606	9.21076929	0.725465
34	0.02944389	8.83996390	0.26028291		34.00000000	1.01000000	8.92836354	0.746881
35	0.03922284	8.83838650	0.34666665		35.00000000	0.98114286	8.67171978	0.768359
36	0.04937914	8.84684090	0.43684943		36.00000000	0.95388889	8.43890324	0.789731
37	0.05923848	8.85547730	0.52458501		37.00000000	0.92810811	8.21884028	0.811103
38	0.06937096	8.83000560	0.61254599		38.00000000	0.90368421	7.97953664	0.832471
39	0.07948484	8.84646890	0.70316012		39.00000000	0.88051282	7.78942928	0.853954
40	0.08935906	8.84917930	0.79075434		40.00000000	0.85850000	7.59702043	0.875353
41	0.09948187	8.83842660	0.87926317		41.00000000	0.83756098	7.40272121	0.896717
42	0.10930771	8.84376240	0.96669142		42.00000000	0.81761905	7.23082859	0.918082
43	0.11944392	8.84616370	1.05662047		43.00000000	0.79860465	7.06458748	0.939565
44	0.12929134	8.83968160	1.14289428		44.00000000	0.78045455	6.89896969	0.960938
45	0.13940448	8.84560490	1.23311695		45.00000000	0.76311111	6.75017938	0.982326
46	0.14920278	8.84263040	1.31934504		46.00000000	0.74652174	6.60121582	1.003687
47	0.15940300	8.85209660	1.41105075		47.00000000	0.73063830	6.46768079	1.025175
48	0.16951613	8.85559460	1.50116613		48.00000000	0.71541667	6.33543997	1.046572
49	0.17935164	8.83190350	1.58401638		49.00000000	0.70081633	6.18954217	1.067949
50	0.18947519	8.84998230	1.67685208		50.00000000	0.68680000	6.07816784	1.089438
51	0.19927053	8.84658240	1.76286316		51.00000000	0.67333333	5.95669882	1.110827
52	0.20944841	8.84735680	1.85306481		52.00000000	0.66038462	5.84265832	1.132177
53	0.21926384	8.83632370	1.93748627		53.00000000	0.64792453	5.72527087	1.153547
54	0.22937548	8.85182950	2.03039264		54.00000000	0.63592593	5.62910787	1.175036
55	0.23922142	8.84615040	2.11618866		55.00000000	0.62436364	5.52321463	1.196419
56	0.24936061	8.83975030	2.20428553		56.00000000	0.61321429	5.42066117	1.217769
57	0.25951615	8.83894250	2.29384833		57.00000000	0.60245614	5.32507518	1.239151
58	0.26933604	8.84883690	2.38331069		58.00000000	0.59206897	5.23912171	1.260633
59	0.27947894	8.83582310	2.46942647		59.00000000	0.58203390	5.14274856	1.282007
60	0.28929660	8.84886070	2.55994531		60.00000000	0.57233333	5.06449794	1.303365
61	0.29944694	8.83451370	2.64546809		61.00000000	0.56295082	4.97339673	1.324734
62	0.30929437	8.84461310	2.73558904		62.00000000	0.55387097	4.89877442	1.346213
63	0.31944770	8.83428480	2.82209196		63.00000000	0.54507937	4.81538635	1.367584
64	0.32924080	8.83815670	2.90988178		64.00000000	0.53656250	4.74222345	1.388929
65	0.33939487	8.83379270	2.99814393		65.00000000	0.52830769	4.66696064	1.410311
66	0.34918201	8.83441830	3.08481994		66.00000000	0.52030303	4.59657461	1.431795
67	0.35937700	8.83730030	3.17592247		67.00000000	0.51253731	4.52944615	1.453171
68	0.36951545	8.84557820	3.26857781		68.00000000	0.50500000	4.46701699	1.474542
69	0.37935320	8.84157090	3.35407821		69.00000000	0.49768116	4.40028326	1.495921
70	0.38950801	8.82416150	3.43708159		70.00000000	0.49057143	4.32888151	1.517399
71	0.39932120	8.83804320	3.52921802		71.00000000	0.48366197	4.27462540	1.538794
72	0.40948048	8.82991220	3.61567669		72.00000000	0.47694444	4.21137757	1.560156
73	0.41928324	8.83066650	3.70255046		73.00000000	0.47041096	4.15404230	1.581523
74	0.42945072	8.81532670	3.78574840		74.00000000	0.46405405	4.09078809	1.603018
75	0.43925720	8.82849030	3.87797793		75.00000000	0.45786667	4.04227143	1.624408
76	0.44941202	8.82182690	3.96463505		76.00000000	0.45184211	3.98607284	1.645851
77	0.45956162	8.80863570	4.04811089		77.00000000	0.44597403	3.92842273	1.667212
78	0.46939343	8.79554370	4.12857043		78.00000000	0.44025641	3.87229450	1.688698
79	0.47953856	8.80658340	4.22309632		79.00000000	0.43468354	3.82807689	1.710103
80	0.48933092	8.75761890	4.28537371		80.00000000	0.42925000	3.75920791	1.731493
81	0.49948871	8.75820640	4.37462522		81.00000000	0.42395062	3.71304701	1.752970
82	0.50931972	8.72303870	4.44281563		82.00000000	0.41878049	3.65303840	1.774349
83	0.51940757	8.67755700	4.50718879		83.00000000	0.41373494	3.59020852	1.795697
84	0.52922374	8.60699080	4.55502386		84.00000000	0.40880952	3.51861981	1.817071
85	0.53937036	8.54101750	4.60677168		85.00000000	0.40400000	3.45057107	1.838563
86	0.54949468	8.39519210	4.61311340		86.00000000	0.39930233	3.35221973	1.859948
87	0.55931157	8.23000810	4.60313875		87.00000000	0.39471264	3.24848825	1.881292
88	0.56942546	7.99592880	4.55308544		88.00000000	0.39022727	3.12022949	1.902681
89	0.57926023	7.65902190	4.43656679		89.00000000	0.38584270	2.95517766	1.924160
90	0.58934510	7.20726250	4.24756484		90.00000000	0.38155556	2.74997105	1.945544
91	0.59915006	6.64330430	3.98033617		91.00000000	0.37736264	2.50693483	1.966896
92	0.60928482	5.87171550	3.57754712		92.00000000	0.37326087	2.19168163	1.988378
93	0.61910397	4.95395850	3.06701537		93.00000000	0.36924731	1.82923586	2.009886
94	0.62920147	3.77070000	2.37252998		94.00000000	0.36531915	1.37750891	2.031273
95	0.63933688	2.34055520	1.49640326		95.00000000	0.36147368	0.84604911	2.052618
96	0.64906007	0.69577885	0.45160227		96.00000000	0.35770833	0.24888589	2.073993
97	0.65914416	-1.28388040	-0.84626227		97.00000000	0.35402062	-0.45452013	2.095485
98	0.66889554	-3.51271220	-2.34963752		98.00000000	0.35040816	-1.23088303	2.116912
99	0.67902881	-6.20546200	-4.21368748		99.00000000	0.34686869	-2.15248046	2.138291
100	0.68893504	-9.21738430	-6.35017902		100.00000000	0.34340000	-3.16524977	2.159667
101	0.69124448	-10.00005100	-6.91248005		101.00000000	0.34000000	-3.40001734	2.181149
