# Supplementary material for: Study on the Electrical Injection Regeneration of Industrialized B-Doped Czochralski Silicon PERC Solar Cells
Source: Hindawi journal article supplement (doi:10.1155/2019/5357370), 2019-06-20
Supplement: f1 [file 5357370.f1.zip › section3.2/IVRawData_1-5-4h.csv]

18:52 02/04/2018
Test Lot:	JK-PERC
Recipe:	Recipe_YJX-LID
Cell Name:	1-5-4h
Test Order:	2
Test Condition:	Light
1	-0.29987901	8.88355640	-2.66399210		1.00000000	34.34000000	305.06132678	0.000000
2	-0.29005867	8.86282250	-2.57073851		2.00000000	17.17000000	152.17466233	0.061778
3	-0.27992722	8.87296100	-2.48378331		3.00000000	11.44666667	101.56582691	0.083194
4	-0.27013147	8.85801790	-2.39282940		4.00000000	8.58500000	76.04608367	0.104688
5	-0.26002085	8.87775040	-2.30840021		5.00000000	6.86800000	60.97238975	0.126132
6	-0.24982244	8.86602310	-2.21493152		6.00000000	5.72333333	50.74320554	0.147486
7	-0.23999019	8.88083460	-2.13131318		7.00000000	4.90571429	43.56683717	0.168876
8	-0.22986172	8.85849860	-2.03622972		8.00000000	4.29250000	38.02510524	0.190361
9	-0.22001684	8.87130170	-1.95183577		9.00000000	3.81555556	33.84894449	0.211749
10	-0.20989060	8.86085130	-1.85980940		10.00000000	3.43400000	30.42816336	0.233103
11	-0.20008962	8.87939930	-1.77667563		11.00000000	3.12181818	27.71987018	0.254475
12	-0.18991798	8.86478520	-1.68358210		12.00000000	2.86166667	25.36806031	0.275952
13	-0.18013041	8.86792950	-1.59738378		13.00000000	2.64153846	23.42497685	0.297317
14	-0.16996919	8.87475780	-1.50843539		14.00000000	2.45285714	21.76851306	0.318651
15	-0.16013919	8.86487480	-1.41961387		15.00000000	2.28933333	20.29465338	0.340030
16	-0.15000699	8.87985130	-1.33203977		16.00000000	2.14625000	19.05838085	0.361506
17	-0.13986735	8.87318610	-1.24106903		17.00000000	2.02000000	17.92383592	0.382883
18	-0.13003884	8.87019730	-1.15347017		18.00000000	1.90777778	16.92236529	0.404255
19	-0.11990888	8.86744500	-1.06328540		19.00000000	1.80736842	16.02674007	0.425616
20	-0.11006920	8.86877730	-0.97617922		20.00000000	1.71700000	15.22769062	0.447093
21	-0.09988417	8.86642070	-0.88561505		21.00000000	1.63523810	14.49870890	0.468475
22	-0.09005714	8.87631030	-0.79937514		22.00000000	1.56090909	13.85511344	0.489869
23	-0.07992718	8.86551570	-0.70859570		23.00000000	1.49304348	13.23660040	0.511225
24	-0.07011132	8.88034060	-0.62261239		24.00000000	1.43083333	12.70628734	0.532698
25	-0.05998732	8.86211010	-0.53161422		25.00000000	1.37360000	12.17299443	0.554080
26	-0.04980154	8.87061410	-0.44177021		26.00000000	1.32076923	11.71603416	0.575465
27	-0.03997898	8.87250040	-0.35471349		27.00000000	1.27185185	11.28450606	0.596945
28	-0.02984306	8.86841490	-0.26466066		28.00000000	1.22642857	10.87647742	0.618345
29	-0.02002795	8.86027620	-0.17745312		29.00000000	1.18413793	10.49178913	0.639711
30	-0.00990617	8.86193940	-0.08778792		30.00000000	1.14466667	10.14396663	0.661089
31	-0.00065449	8.87061600	-0.00580576		31.00000000	1.10774194	9.82635334	0.682689
32	0.00947526	8.87394050	0.08408287		32.00000000	1.07312500	9.52284740	0.704083
33	0.01931391	8.87183950	0.17134994		33.00000000	1.04060606	9.23208995	0.725430
34	0.02944433	8.86927130	0.26114972		34.00000000	1.01000000	8.95796401	0.746811
35	0.03929042	8.87401200	0.34866369		35.00000000	0.98114286	8.70667349	0.768291
36	0.04940447	8.86884400	0.43816049		36.00000000	0.95388889	8.45989175	0.789663
37	0.05921930	8.86760710	0.52513349		37.00000000	0.92810811	8.23009805	0.811013
38	0.06936088	8.87769890	0.61576503		38.00000000	0.90368421	8.02263632	0.832388
39	0.07950022	8.86967280	0.70514095		39.00000000	0.88051282	7.80986061	0.853863
40	0.08934111	8.87126540	0.79256871		40.00000000	0.85850000	7.61598135	0.875254
41	0.09945292	8.86548230	0.88169810		41.00000000	0.83756098	7.42538200	0.896602
42	0.10932283	8.86364170	0.96899839		42.00000000	0.81761905	7.24708229	0.917977
43	0.11943240	8.87032030	1.05940364		43.00000000	0.79860465	7.08387905	0.939461
44	0.12926957	8.87789730	1.14764197		44.00000000	0.78045455	6.92879530	0.960840
45	0.13939776	8.86711120	1.23605544		45.00000000	0.76311111	6.76659108	0.982186
46	0.14922971	8.86935420	1.32357116		46.00000000	0.74652174	6.62116572	1.003555
47	0.15938023	8.87332440	1.41423248		47.00000000	0.73063830	6.48319064	1.025035
48	0.16950616	8.86623190	1.50288092		48.00000000	0.71541667	6.34305007	1.046400
49	0.17938279	8.86011220	1.58935165		49.00000000	0.70081633	6.20931128	1.067771
50	0.18951692	8.86798950	1.68063406		50.00000000	0.68680000	6.09053519	1.089123
51	0.19929230	8.87153530	1.76802867		51.00000000	0.67333333	5.97350044	1.110609
52	0.20943463	8.85855870	1.85528896		52.00000000	0.66038462	5.85005588	1.131981
53	0.21927850	8.87558270	1.94622446		53.00000000	0.64792453	5.75070773	1.153359
54	0.22942677	8.85771080	2.03219598		54.00000000	0.63592593	5.63284794	1.174708
55	0.23924533	8.85442640	2.11838017		55.00000000	0.62436364	5.52838187	1.196185
56	0.24939881	8.86355500	2.21056007		56.00000000	0.61321429	5.43525855	1.217557
57	0.25952774	8.86059280	2.29956962		57.00000000	0.60245614	5.33811854	1.238950
58	0.26933143	8.86743350	2.38827854		58.00000000	0.59206897	5.25013218	1.260420
59	0.27950278	8.86276440	2.47716729		59.00000000	0.58203390	5.15842931	1.281797
60	0.28933397	8.87118150	2.56673416		60.00000000	0.57233333	5.07727288	1.303153
61	0.29945695	8.85764220	2.65248252		61.00000000	0.56295082	4.98641694	1.324531
62	0.30930975	8.86096190	2.74078191		62.00000000	0.55387097	4.90782954	1.346013
63	0.31944686	8.86522580	2.83196855		63.00000000	0.54507937	4.83225165	1.367413
64	0.32926765	8.86357500	2.91848851		64.00000000	0.53656250	4.75586196	1.388768
65	0.33942559	8.86309430	3.00836101		65.00000000	0.52830769	4.68244090	1.410136
66	0.34924415	8.85760590	3.09346704		66.00000000	0.52030303	4.60863919	1.431607
67	0.35936490	8.86016560	3.18403252		67.00000000	0.51253731	4.54116547	1.452989
68	0.36954814	8.86988160	3.27784825		68.00000000	0.50500000	4.47929021	1.474341
69	0.37936226	8.87415410	3.36651915		69.00000000	0.49768116	4.41649930	1.495719
70	0.38949043	8.85689160	3.44967452		70.00000000	0.49057143	4.34493796	1.517199
71	0.39933503	8.86916920	3.54176995		71.00000000	0.48366197	4.28967986	1.538576
72	0.40945205	8.85030270	3.62377458		72.00000000	0.47694444	4.22110270	1.559918
73	0.41929296	8.86694150	3.71784615		73.00000000	0.47041096	4.17110645	1.581293
74	0.42944419	8.84356590	3.79781799		74.00000000	0.46405405	4.10389261	1.602779
75	0.43924266	8.85010910	3.88734546		75.00000000	0.45786667	4.05216995	1.624164
76	0.44941029	8.82966610	3.96814280		76.00000000	0.45184211	3.98961492	1.645513
77	0.45955485	8.84031010	4.06260738		77.00000000	0.44597403	3.94254869	1.666902
78	0.46939573	8.83566570	4.14742375		78.00000000	0.44025641	3.88995846	1.688376
79	0.47953880	8.81029420	4.22487791		79.00000000	0.43468354	3.82968991	1.709753
80	0.48934695	8.80760570	4.30997499		80.00000000	0.42925000	3.78066475	1.731123
81	0.49950117	8.76870820	4.37998001		81.00000000	0.42395062	3.71749925	1.752490
82	0.50932348	8.75620840	4.45974253		82.00000000	0.41878049	3.66692923	1.773964
83	0.51945537	8.69959640	4.51905207		83.00000000	0.41373494	3.59932699	1.795325
84	0.52925682	8.63917730	4.57234351		84.00000000	0.40880952	3.53177796	1.816702
85	0.53938276	8.54407690	4.60852778		85.00000000	0.40400000	3.45180707	1.838052
86	0.54953027	8.43092440	4.63304816		86.00000000	0.39930233	3.36648772	1.859527
87	0.55932277	8.25222970	4.61565997		87.00000000	0.39471264	3.25725940	1.880911
88	0.56944275	8.02490140	4.56972192		88.00000000	0.39022727	3.13153539	1.902299
89	0.57926577	7.68604660	4.45226370		89.00000000	0.38584270	2.96560495	1.923778
90	0.58937836	7.24845170	4.27208058		90.00000000	0.38155556	2.76568702	1.945159
91	0.59917754	6.66128730	3.99129374		91.00000000	0.37736264	2.51372094	1.966517
92	0.60929310	5.90243630	3.59631371		92.00000000	0.37326087	2.20314851	1.988001
93	0.61910051	4.95723960	3.06902956		93.00000000	0.36924731	1.83044740	2.009563
94	0.62921900	3.77932880	2.37802549		94.00000000	0.36531915	1.38066118	2.030951
95	0.63932705	2.32065960	1.48366046		95.00000000	0.36147368	0.83885738	2.052309
96	0.64908534	0.64518154	0.41877788		96.00000000	0.35770833	0.23078681	2.073690
97	0.65914506	-1.37230740	-0.90454964		97.00000000	0.35402062	-0.48582511	2.095175
98	0.66890109	-3.64997410	-2.44147165		98.00000000	0.35040816	-1.27898072	2.116609
99	0.67898685	-6.41278410	-4.35419608		99.00000000	0.34686869	-2.22439400	2.137984
100	0.68898475	-9.54365830	-6.57543503		100.00000000	0.34340000	-3.27729226	2.159366
101	0.69031256	-10.00034800	-6.90336583		101.00000000	0.34000000	-3.40011832	2.180858
18:53 02/04/2018
Test Lot:	JK-PERC
Recipe:	Recipe_YJX-LID
Cell Name:	1-5-4h
Test Order:	3
Test Condition:	Light
1	-0.29989278	8.87248130	-2.66079308		1.00000000	34.34000000	304.68100784	0.000000
2	-0.29006442	8.86411380	-2.57116403		2.00000000	17.17000000	152.19683395	0.061790
3	-0.27991083	8.87635330	-2.48458742		3.00000000	11.44666667	101.60465744	0.083217
4	-0.27008545	8.86781020	-2.39506651		4.00000000	8.58500000	76.13015057	0.104704
5	-0.25995788	8.86579900	-2.30473431		5.00000000	6.86800000	60.89030753	0.126083
6	-0.24979682	8.86061570	-2.21335363		6.00000000	5.72333333	50.71225719	0.147493
7	-0.23996623	8.86513330	-2.12733262		7.00000000	4.90571429	43.48981107	0.168895
8	-0.22981782	8.85445790	-2.03491221		8.00000000	4.29250000	38.00776054	0.190384
9	-0.21998873	8.87678050	-1.95279167		9.00000000	3.81555556	33.86984915	0.211763
10	-0.20983884	8.85427090	-1.85796993		10.00000000	3.43400000	30.40556627	0.233112
11	-0.20001495	8.86052700	-1.77223786		11.00000000	3.12181818	27.66095429	0.254497
12	-0.18986282	8.86908530	-1.68390955		12.00000000	2.86166667	25.38036577	0.275976
13	-0.18008135	8.86390970	-1.59622483		13.00000000	2.64153846	23.41435839	0.297341
14	-0.16991657	8.86568930	-1.50642752		14.00000000	2.45285714	21.74626933	0.318694
15	-0.16010682	8.86002350	-1.41855019		15.00000000	2.28933333	20.28354713	0.340067
16	-0.14996883	8.86543370	-1.32953872		16.00000000	2.14625000	19.02743708	0.361547
17	-0.13982192	8.87883000	-1.24145506		17.00000000	2.02000000	17.93523660	0.382952
18	-0.12997793	8.84824280	-1.15007628		18.00000000	1.90777778	16.88048099	0.404298
19	-0.11983325	8.87597940	-1.06363746		19.00000000	1.80736842	16.04216487	0.425667
20	-0.11002945	8.87840940	-0.97688650		20.00000000	1.71700000	15.24422894	0.447157
21	-0.09989221	8.86884500	-0.88592856		21.00000000	1.63523810	14.50267320	0.468536
22	-0.09007949	8.86811540	-0.79883528		22.00000000	1.56090909	13.84232195	0.489879
23	-0.07994746	8.86299710	-0.70857408		23.00000000	1.49304348	13.23284002	0.511250
24	-0.07010123	8.86830710	-0.62167924		24.00000000	1.43083333	12.68906941	0.532724
25	-0.05996102	8.87286850	-0.53202622		25.00000000	1.37360000	12.18777217	0.554114
26	-0.04980889	8.86594770	-0.44160304		26.00000000	1.32076923	11.70987092	0.575498
27	-0.03999095	8.86153890	-0.35438139		27.00000000	1.27185185	11.27056466	0.596837
28	-0.02983362	8.87234590	-0.26469420		28.00000000	1.22642857	10.88129851	0.618310
29	-0.02003875	8.87432190	-0.17783035		29.00000000	1.18413793	10.50842117	0.639744
30	-0.00989631	8.85027690	-0.08758504		30.00000000	1.14466667	10.13061696	0.661125
31	-0.00065817	8.87016300	-0.00583807		31.00000000	1.10774194	9.82585153	0.682666
32	0.00950194	8.86608120	0.08424493		32.00000000	1.07312500	9.51441339	0.704133
33	0.01932629	8.85860820	0.17120405		33.00000000	1.04060606	9.21832138	0.725508
34	0.02945506	8.87339590	0.26136636		34.00000000	1.01000000	8.96212986	0.746884
35	0.03927941	8.86281010	0.34812597		35.00000000	0.98114286	8.69568282	0.768252
36	0.04944837	8.85335920	0.43778415		36.00000000	0.95388889	8.44512097	0.789740
37	0.05927570	8.87537670	0.52609418		37.00000000	0.92810811	8.23730908	0.811117
38	0.06940670	8.86024670	0.61496045		38.00000000	0.90368421	8.00686504	0.832477
39	0.07958830	8.86971760	0.70592575		39.00000000	0.88051282	7.80990006	0.853842
40	0.08934642	8.86171050	0.79176207		40.00000000	0.85850000	7.60777846	0.875322
41	0.09951240	8.86575890	0.88225293		41.00000000	0.83756098	7.42561367	0.896710
42	0.10934941	8.86702920	0.96960441		42.00000000	0.81761905	7.24985197	0.918102
43	0.11953548	8.86374950	1.05953255		43.00000000	0.79860465	7.07863158	0.939457
44	0.12931742	8.85998630	1.14575057		44.00000000	0.78045455	6.91481658	0.960921
45	0.13947223	8.86509510	1.23643458		45.00000000	0.76311111	6.76505257	0.982312
46	0.14928468	8.87800880	1.32535070		46.00000000	0.74652174	6.62762657	1.003692
47	0.15943800	8.85711960	1.41216143		47.00000000	0.73063830	6.47135079	1.025168
48	0.16957942	8.86664010	1.50359969		48.00000000	0.71541667	6.34334210	1.046549
49	0.17937846	8.86494640	1.59018043		49.00000000	0.70081633	6.21269917	1.067889
50	0.18957198	8.86208250	1.68000253		50.00000000	0.68680000	6.08647826	1.089260
51	0.19931446	8.86793330	1.76750734		51.00000000	0.67333333	5.97107509	1.110740
52	0.20946927	8.86005500	1.85590925		52.00000000	0.66038462	5.85104401	1.132130
53	0.21930629	8.87232970	1.94575771		53.00000000	0.64792453	5.74860004	1.153491
54	0.22942537	8.86456580	2.03375629		54.00000000	0.63592593	5.63720721	1.174861
55	0.23925717	8.85552410	2.11874764		55.00000000	0.62436364	5.52906723	1.196335
56	0.24939933	8.86256980	2.21031897		56.00000000	0.61321429	5.43465441	1.217718
57	0.25954744	8.86873630	2.30185780		57.00000000	0.60245614	5.34302464	1.239065
58	0.26934800	8.86316870	2.38727676		58.00000000	0.59206897	5.24760712	1.260441
59	0.27951175	8.86093430	2.47673525		59.00000000	0.58203390	5.15736413	1.281931
60	0.28935620	8.87288670	2.56742478		60.00000000	0.57233333	5.07824882	1.303310
61	0.29947379	8.86311240	2.65426986		61.00000000	0.56295082	4.98949639	1.324659
62	0.30931750	8.86431410	2.74188748		62.00000000	0.55387097	4.90968623	1.346040
63	0.31941500	8.86651330	2.83209735		63.00000000	0.54507937	4.83295344	1.367519
64	0.32925126	8.86270520	2.91805685		64.00000000	0.53656250	4.75539526	1.388907
65	0.33941427	8.86526200	3.00899643		65.00000000	0.52830769	4.68358611	1.410268
66	0.34924382	8.85041710	3.09095348		66.00000000	0.52030303	4.60489884	1.431645
67	0.35939121	8.87433530	3.18935810		67.00000000	0.51253731	4.54842797	1.453108
68	0.36954826	8.85023500	3.27058894		68.00000000	0.50500000	4.46936868	1.474481
69	0.37937483	8.85882470	3.36081511		69.00000000	0.49768116	4.40887015	1.495838
70	0.38952965	8.85285850	3.44845087		70.00000000	0.49057143	4.34295944	1.517219
71	0.39936441	8.85136320	3.53491944		71.00000000	0.48366197	4.28106778	1.538707
72	0.40948725	8.85021500	3.62405020		72.00000000	0.47694444	4.22106088	1.560077
73	0.41932127	8.85157870	3.71165522		73.00000000	0.47041096	4.16387962	1.581468
74	0.42948726	8.84514050	3.79887516		74.00000000	0.46405405	4.10462331	1.602818
75	0.43930638	8.84597110	3.88609154		75.00000000	0.45786667	4.05027530	1.624293
76	0.44945005	8.83033280	3.96879352		76.00000000	0.45184211	3.98991616	1.645690
77	0.45960039	8.83143230	4.05892973		77.00000000	0.44597403	3.93858942	1.667079
78	0.46945527	8.83521080	4.14773627		78.00000000	0.44025641	3.88975819	1.688557
79	0.47961304	8.81704810	4.22877124		79.00000000	0.43468354	3.83262572	1.709938
80	0.48941210	8.79844190	4.30606393		80.00000000	0.42925000	3.77673119	1.731286
81	0.49952969	8.77450370	4.38312511		81.00000000	0.42395062	3.71995626	1.752654
82	0.50934738	8.74726680	4.45539743		82.00000000	0.41878049	3.66318466	1.774128
83	0.51947838	8.69732570	4.51807266		83.00000000	0.41373494	3.59838752	1.795490
84	0.52926773	8.64875890	4.57750899		84.00000000	0.40880952	3.53569501	1.816843
85	0.53937638	8.54360010	4.60821609		85.00000000	0.40400000	3.45161444	1.838219
86	0.54953343	8.43085860	4.63303864		86.00000000	0.39930233	3.36646145	1.859693
87	0.55934364	8.23998070	4.60898080		87.00000000	0.39471264	3.25242457	1.881084
88	0.56946570	7.99915030	4.55524172		88.00000000	0.39022727	3.12148661	1.902437
89	0.57927519	7.69276710	4.45622912		89.00000000	0.38584270	2.96819800	1.923813
90	0.58938909	7.23440980	4.26388221		90.00000000	0.38155556	2.76032925	1.945305
91	0.59916210	6.67008730	3.99646351		91.00000000	0.37736264	2.51704173	1.966682
92	0.60928118	5.90100340	3.59537031		92.00000000	0.37326087	2.20261366	1.988141
93	0.61913824	4.96179680	3.07203814		93.00000000	0.36924731	1.83213013	2.009553
94	0.62923133	3.77230640	2.37365337		94.00000000	0.36531915	1.37809576	2.031052
95	0.63935858	2.30984020	1.47681615		95.00000000	0.36147368	0.83494645	2.052443
96	0.64907205	0.64898980	0.42124114		96.00000000	0.35770833	0.23214906	2.073795
97	0.65916139	-1.39690350	-0.92078485		97.00000000	0.35402062	-0.49453264	2.095164
98	0.66892767	-3.68411540	-2.46440673		98.00000000	0.35040816	-1.29094411	2.116650
99	0.67900956	-6.45841170	-4.38532329		99.00000000	0.34686869	-2.24022079	2.138093
100	0.68897903	-9.60254860	-6.61595462		100.00000000	0.34340000	-3.29751519	2.159476
101	0.69008428	-10.00005600	-6.90088144		101.00000000	0.34000000	-3.40001904	2.180846
18:53 02/04/2018
Test Lot:	JK-PERC
Recipe:	Recipe_YJX-LID
Cell Name:	1-5-4h
Test Order:	4
Test Condition:	Light
1	-0.29986581	8.86678600	-2.65884597		1.00000000	34.34000000	304.48543124	0.000000
2	-0.29001942	8.87354090	-2.57349919		2.00000000	17.17000000	152.35869725	0.061794
3	-0.27991918	8.87394140	-2.48398640		3.00000000	11.44666667	101.57704923	0.083210
4	-0.27006906	8.86130050	-2.39316310		4.00000000	8.58500000	76.07426479	0.104717
5	-0.25994131	8.86295600	-2.30384839		5.00000000	6.86800000	60.87078181	0.126102
6	-0.24974433	8.87007810	-2.21525171		6.00000000	5.72333333	50.76641366	0.147441
7	-0.23993066	8.85740850	-2.12516387		7.00000000	4.90571429	43.45191541	0.168825
8	-0.22982003	8.87288380	-2.03916642		8.00000000	4.29250000	38.08685371	0.190308
9	-0.21997808	8.85917280	-1.94882382		9.00000000	3.81555556	33.80266599	0.211700
10	-0.20980865	8.86272910	-1.85947723		10.00000000	3.43400000	30.43461173	0.233049
11	-0.20002550	8.86659050	-1.77354420		11.00000000	3.12181818	27.67988343	0.254424
12	-0.18991636	8.87324710	-1.68517479		12.00000000	2.86166667	25.39227545	0.275896
13	-0.18010493	8.84653950	-1.59330538		13.00000000	2.64153846	23.36847434	0.297265
14	-0.16995707	8.87332730	-1.50808471		14.00000000	2.45285714	21.76500425	0.318612
15	-0.16014415	8.86271570	-1.41931207		15.00000000	2.28933333	20.28971048	0.339989
16	-0.14998513	8.85251710	-1.32774593		16.00000000	2.14625000	18.99971483	0.361467
17	-0.13984026	8.87214280	-1.24068276		17.00000000	2.02000000	17.92172846	0.382842
18	-0.13001841	8.85826780	-1.15173789		18.00000000	1.90777778	16.89960646	0.404215
19	-0.11985642	8.87036710	-1.06317044		19.00000000	1.80736842	16.03202138	0.425574
20	-0.11002490	8.86947060	-0.97586262		20.00000000	1.71700000	15.22888102	0.447052
21	-0.09986439	8.85586170	-0.88438525		21.00000000	1.63523810	14.48144242	0.468422
22	-0.09006562	8.87615300	-0.79943623		22.00000000	1.56090909	13.85486791	0.489812
23	-0.07994232	8.84661770	-0.70721917		23.00000000	1.49304348	13.20838486	0.511182
24	-0.07008401	8.88368610	-0.62260431		24.00000000	1.43083333	12.71107419	0.532667
25	-0.05996444	8.84214020	-0.53021396		25.00000000	1.37360000	12.14556378	0.554040
26	-0.04979203	8.87475300	-0.44189192		26.00000000	1.32076923	11.72150069	0.575425
27	-0.03996497	8.85651210	-0.35395020		27.00000000	1.27185185	11.26417132	0.596916
28	-0.02983498	8.85807420	-0.26428043		28.00000000	1.22642857	10.86379529	0.618291
29	-0.01998410	8.87280650	-0.17731505		29.00000000	1.18413793	10.50662673	0.639663
30	-0.00983401	8.86505700	-0.08717910		30.00000000	1.14466667	10.14753525	0.661038
31	-0.00065674	8.86592770	-0.00582257		31.00000000	1.10774194	9.82115991	0.682632
32	0.00953110	8.86364840	0.08448033		32.00000000	1.07312500	9.51180269	0.704023
33	0.01934150	8.87076760	0.17157399		33.00000000	1.04060606	9.23097453	0.725366
34	0.02949800	8.84398080	0.26087975		34.00000000	1.01000000	8.93242061	0.746748
35	0.03928756	8.88457200	0.34905318		35.00000000	0.98114286	8.71703436	0.768244
36	0.04944257	8.85889530	0.43800656		36.00000000	0.95388889	8.45040179	0.789624
37	0.05927158	8.87022500	0.52575226		37.00000000	0.92810811	8.23252774	0.810991
38	0.06944445	8.86728670	0.61578383		38.00000000	0.90368421	8.01322698	0.832370
39	0.07956373	8.86269190	0.70514882		39.00000000	0.88051282	7.80371384	0.853859
40	0.08938381	8.86180400	0.79210181		40.00000000	0.85850000	7.60785873	0.875255
41	0.09952691	8.86096000	0.88190392		41.00000000	0.83756098	7.42159430	0.896611
42	0.10935666	8.86053560	0.96895858		42.00000000	0.81761905	7.24454268	0.917986
43	0.11949828	8.85241510	1.05784838		43.00000000	0.79860465	7.06957987	0.939452
44	0.12932505	8.85698130	1.14542955		44.00000000	0.78045455	6.91247131	0.960825
45	0.13945475	8.86009030	1.23558168		45.00000000	0.76311111	6.76123335	0.982165
46	0.14928004	8.87627510	1.32505070		46.00000000	0.74652174	6.62633232	1.003550
47	0.15941867	8.85912610	1.41231010		47.00000000	0.73063830	6.47281681	1.025037
48	0.16959526	8.87170700	1.50459946		48.00000000	0.71541667	6.34696705	1.046408
49	0.17940566	8.86948590	1.59123597		49.00000000	0.70081633	6.21588053	1.067778
50	0.18952122	8.83779620	1.67494992		50.00000000	0.68680000	6.06979843	1.089140
51	0.19929069	8.87781520	1.76926592		51.00000000	0.67333333	5.97772890	1.110609
52	0.20946580	8.86340620	1.85658047		52.00000000	0.66038462	5.85325709	1.131995
53	0.21927173	8.86762330	1.94441910		53.00000000	0.64792453	5.74555064	1.153370
54	0.22940888	8.85835170	2.03218454		54.00000000	0.63592593	5.63325551	1.174732
55	0.23925352	8.86924550	2.12199821		55.00000000	0.62436364	5.53763437	1.196220
56	0.24941894	8.86750510	2.21172372		56.00000000	0.61321429	5.43768081	1.217603
57	0.25954714	8.86111160	2.29987617		57.00000000	0.60245614	5.33843109	1.238993
58	0.26939106	8.85978130	2.38674588		58.00000000	0.59206897	5.24560155	1.260482
59	0.27951628	8.86280250	2.47729759		59.00000000	0.58203390	5.15845149	1.281860
60	0.28936687	8.86656190	2.56568926		60.00000000	0.57233333	5.07462893	1.303230
61	0.29948094	8.85585310	2.65215921		61.00000000	0.56295082	4.98540976	1.324602
62	0.30933824	8.85340980	2.73869821		62.00000000	0.55387097	4.90364665	1.346077
63	0.31948656	8.86147020	2.83112063		63.00000000	0.54507937	4.83020455	1.367467
64	0.32930216	8.86408040	2.91896082		64.00000000	0.53656250	4.75613314	1.388816
65	0.33942741	8.85831450	3.00675475		65.00000000	0.52830769	4.67991569	1.410237
66	0.34926161	8.86592960	3.09652885		66.00000000	0.52030303	4.61297004	1.431720
67	0.35942483	8.85283950	3.18193033		67.00000000	0.51253731	4.53741057	1.453082
68	0.36957982	8.85882380	3.27404251		68.00000000	0.50500000	4.47370602	1.474442
69	0.37939024	8.84495540	3.35568975		69.00000000	0.49768116	4.40196766	1.495815
70	0.38955492	8.86166760	3.45210621		70.00000000	0.49057143	4.34728093	1.517297
71	0.39934969	8.84956170	3.53406972		71.00000000	0.48366197	4.28019646	1.538681
72	0.40951437	8.85745050	3.62725326		72.00000000	0.47694444	4.22451181	1.560033
73	0.41934487	8.84006600	3.70703633		73.00000000	0.47041096	4.15846392	1.581401
74	0.42949539	8.85493180	3.80315239		74.00000000	0.46405405	4.10916700	1.602880
75	0.43929687	8.83797650	3.88249541		75.00000000	0.45786667	4.04661484	1.624243
76	0.44944891	8.84013080	3.97318715		76.00000000	0.45184211	3.99434331	1.645595
77	0.45962846	8.82408710	4.05580156		77.00000000	0.44597403	3.93531365	1.666975
78	0.46944931	8.82084080	4.14093763		78.00000000	0.44025641	3.88343171	1.688455
79	0.47957975	8.80936910	4.22479503		79.00000000	0.43468354	3.82928778	1.709829
80	0.48940429	8.79550650	4.30455861		80.00000000	0.42925000	3.77547117	1.731196
81	0.49954218	8.77666000	4.38431187		81.00000000	0.42395062	3.72087042	1.752576
82	0.50933248	8.74322990	4.45321097		82.00000000	0.41878049	3.66149408	1.774054
83	0.51949048	8.68919660	4.51395491		83.00000000	0.41373494	3.59502423	1.795432
84	0.52929121	8.64957810	4.57814566		84.00000000	0.40880952	3.53602990	1.816819
85	0.53939408	8.54216670	4.60759415		85.00000000	0.40400000	3.45103535	1.838180
86	0.54954463	8.41023060	4.62179706		86.00000000	0.39930233	3.35822464	1.859662
87	0.55935800	8.25666900	4.61843386		87.00000000	0.39471264	3.25901165	1.881050
88	0.56948549	8.01472660	4.56427051		88.00000000	0.39022727	3.12756490	1.902442
89	0.57929587	7.67553040	4.44640306		89.00000000	0.38584270	2.96154735	1.923930
90	0.58938766	7.22822570	4.26022703		90.00000000	0.38155556	2.75796967	1.945291
91	0.59920847	6.65552430	3.98804653		91.00000000	0.37736264	2.51154620	1.966652
92	0.60932255	5.88506790	3.58590458		92.00000000	0.37326087	2.19666556	1.988121
93	0.61910838	4.95845560	3.06982141		93.00000000	0.36924731	1.83089640	2.009672
94	0.62923139	3.75283000	2.36139844		94.00000000	0.36531915	1.37098066	2.031069
95	0.63936627	2.30323770	1.47261250		95.00000000	0.36147368	0.83255982	2.052419
96	0.64910972	0.63543749	0.41246865		96.00000000	0.35770833	0.22730129	2.073804
97	0.65918952	-1.39918300	-0.92232677		97.00000000	0.35402062	-0.49533963	2.095298
98	0.66891658	-3.67143370	-2.45588287		98.00000000	0.35040816	-1.28650034	2.116684
99	0.67904556	-6.45105220	-4.38055835		99.00000000	0.34686869	-2.23766801	2.138056
100	0.68901968	-9.58189110	-6.60211154		100.00000000	0.34340000	-3.29042140	2.159434
101	0.69022024	-10.00009000	-6.90226452		101.00000000	0.34000000	-3.40003060	2.180910
