# Supplementary material for: Study on the Electrical Injection Regeneration of Industrialized B-Doped Czochralski Silicon PERC Solar Cells
Source: Hindawi journal article supplement (doi:10.1155/2019/5357370), 2019-06-20
Supplement: f1 [file 5357370.f1.zip › section3.2/IVRawData_1-5-5h.csv]

19:56 02/04/2018
Test Lot:	JK-PERC
Recipe:	Recipe_YJX-LID
Cell Name:	1-5-5h
Test Order:	2
Test Condition:	Light
1	-0.29979086	8.87893680	-2.66182410		1.00000000	34.34000000	304.90268971	0.000000
2	-0.29002196	8.87074280	-2.57271021		2.00000000	17.17000000	152.31065388	0.061795
3	-0.27986974	8.87041570	-2.48256094		3.00000000	11.44666667	101.53669171	0.083219
4	-0.27004573	8.86704830	-2.39450853		4.00000000	8.58500000	76.12360966	0.104719
5	-0.25988308	8.86926080	-2.30497081		5.00000000	6.86800000	60.91408317	0.126109
6	-0.24971300	8.86383060	-2.21341373		6.00000000	5.72333333	50.73065713	0.147514
7	-0.23994707	8.86329940	-2.12672272		7.00000000	4.90571429	43.48081449	0.168913
8	-0.22975092	8.86731340	-2.03727341		8.00000000	4.29250000	38.06294277	0.190400
9	-0.21993810	8.87007710	-1.95086790		9.00000000	3.81555556	33.84427196	0.211783
10	-0.20982532	8.85843660	-1.85872429		10.00000000	3.43400000	30.41987128	0.233133
11	-0.19993508	8.87151530	-1.77372712		11.00000000	3.12181818	27.69525776	0.254510
12	-0.18983868	8.86486150	-1.68289361		12.00000000	2.86166667	25.36827866	0.275987
13	-0.18003032	8.85977650	-1.59502840		13.00000000	2.64153846	23.40344039	0.297348
14	-0.16989745	8.86952780	-1.50691016		14.00000000	2.45285714	21.75568462	0.318692
15	-0.16004294	8.87226100	-1.41994273		15.00000000	2.28933333	20.31156285	0.340069
16	-0.14991304	8.86416440	-1.32885383		16.00000000	2.14625000	19.02471284	0.361536
17	-0.13976082	8.86748700	-1.23932725		17.00000000	2.02000000	17.91232374	0.382921
18	-0.12992640	8.85723020	-1.15078803		18.00000000	1.90777778	16.89762695	0.404286
19	-0.11977120	8.88409710	-1.06405897		19.00000000	1.80736842	16.05683655	0.425672
20	-0.10996358	8.87109470	-0.97549733		20.00000000	1.71700000	15.23166960	0.447143
21	-0.09977786	8.87106510	-0.88513591		21.00000000	1.63523810	14.50630360	0.468522
22	-0.08999258	8.86763670	-0.79802146		22.00000000	1.56090909	13.84157474	0.489910
23	-0.07985672	8.86715130	-0.70810165		23.00000000	1.49304348	13.23904242	0.511253
24	-0.07001562	8.87066270	-0.62108492		24.00000000	1.43083333	12.69243988	0.532740
25	-0.05990954	8.87582590	-0.53174662		25.00000000	1.37360000	12.19183446	0.554117
26	-0.04972456	8.86541750	-0.44082898		26.00000000	1.32076923	11.70917065	0.575496
27	-0.03990132	8.87254140	-0.35402608		27.00000000	1.27185185	11.28455821	0.596902
28	-0.02975207	8.84451010	-0.26314245		28.00000000	1.22642857	10.84715989	0.618368
29	-0.02000027	8.87426760	-0.17748777		29.00000000	1.18413793	10.50835688	0.639762
30	-0.00982274	8.85465530	-0.08697698		30.00000000	1.14466667	10.13562877	0.661167
31	-0.00066639	8.86994650	-0.00591080		31.00000000	1.10774194	9.82561170	0.682644
32	0.00948414	8.86681940	0.08409420		32.00000000	1.07312500	9.51520557	0.704114
33	0.01933911	8.85225010	0.17119467		33.00000000	1.04060606	9.21170510	0.725481
34	0.02948882	8.86896230	0.26153522		34.00000000	1.01000000	8.95765192	0.746849
35	0.03925522	8.86721990	0.34808467		35.00000000	0.98114286	8.70000947	0.768218
36	0.04942948	8.87106510	0.43849217		36.00000000	0.95388889	8.46201043	0.789711
37	0.05925171	8.85194680	0.52449296		37.00000000	0.92810811	8.21556360	0.811081
38	0.06939992	8.86775880	0.61542178		38.00000000	0.90368421	8.01365361	0.832468
39	0.07954591	8.86284730	0.70500324		39.00000000	0.88051282	7.80385067	0.853814
40	0.08935175	8.87487790	0.79298588		40.00000000	0.85850000	7.61908268	0.875278
41	0.09953123	8.86640360	0.88248402		41.00000000	0.83756098	7.42615365	0.896646
42	0.10935420	8.86984160	0.96995443		42.00000000	0.81761905	7.25215144	0.918027
43	0.11948306	8.87148570	1.05999226		43.00000000	0.79860465	7.08480974	0.939515
44	0.12934101	8.87751960	1.14822735		44.00000000	0.78045455	6.92850052	0.960898
45	0.13948104	8.85981370	1.23577603		45.00000000	0.76311111	6.76102228	0.982235
46	0.14929730	8.86726860	1.32385926		46.00000000	0.74652174	6.61960878	1.003633
47	0.15943956	8.87980270	1.41579184		47.00000000	0.73063830	6.48792393	1.025103
48	0.16958852	8.85891720	1.50237066		48.00000000	0.71541667	6.33781701	1.046478
49	0.17938916	8.86761000	1.59075311		49.00000000	0.70081633	6.21456587	1.067832
50	0.18955673	8.86647890	1.68070075		50.00000000	0.68680000	6.08949771	1.089206
51	0.19934100	8.86308290	1.76677581		51.00000000	0.67333333	5.96780915	1.110687
52	0.20947878	8.87399670	1.85891400		52.00000000	0.66038462	5.86025090	1.132073
53	0.21929133	8.86554430	1.94413700		53.00000000	0.64792453	5.74420361	1.153440
54	0.22945370	8.86777880	2.03474466		54.00000000	0.63592593	5.63925044	1.174814
55	0.23925954	8.86211300	2.12034508		55.00000000	0.62436364	5.53318110	1.196291
56	0.24943082	8.86062430	2.21011278		56.00000000	0.61321429	5.43346140	1.217664
57	0.25955075	8.86726190	2.30150448		57.00000000	0.60245614	5.34213638	1.239030
58	0.26939234	8.86253740	2.38749969		58.00000000	0.59206897	5.24723335	1.260395
59	0.27956140	8.85604670	2.47580881		59.00000000	0.58203390	5.15451938	1.281876
60	0.28934863	8.86264900	2.56439535		60.00000000	0.57233333	5.07238944	1.303252
61	0.29949239	8.87729260	2.65868158		61.00000000	0.56295082	4.99747915	1.324603
62	0.30933321	8.85152240	2.73806984		62.00000000	0.55387097	4.90260128	1.345975
63	0.31946802	8.86303810	2.83145723		63.00000000	0.54507937	4.83105918	1.367461
64	0.32926866	8.86324600	2.91838913		64.00000000	0.53656250	4.75568543	1.388845
65	0.33941913	8.87607480	3.01270959		65.00000000	0.52830769	4.68929859	1.410204
66	0.34924135	8.85553930	3.09272050		66.00000000	0.52030303	4.60756393	1.431576
67	0.35940593	8.85785100	3.18356418		67.00000000	0.51253731	4.53997915	1.453065
68	0.36955935	8.85788250	3.27351330		68.00000000	0.50500000	4.47323066	1.474455
69	0.37937188	8.84788130	3.35663736		69.00000000	0.49768116	4.40342382	1.495894
70	0.38950598	8.85746860	3.45003699		70.00000000	0.49057143	4.34522102	1.517250
71	0.39934233	8.85304830	3.53539694		71.00000000	0.48366197	4.28188280	1.538731
72	0.40949652	8.85581680	3.62642616		72.00000000	0.47694444	4.22373262	1.560113
73	0.41932023	8.84718890	3.70980528		73.00000000	0.47041096	4.16181461	1.581491
74	0.42947215	8.85548970	3.80318620		74.00000000	0.46405405	4.10942590	1.602977
75	0.43928248	8.83567910	3.88135903		75.00000000	0.45786667	4.04556294	1.624352
76	0.44943067	8.84711840	3.97616635		76.00000000	0.45184211	3.99750060	1.645717
77	0.45956922	8.83343410	4.05957442		77.00000000	0.44597403	3.93948217	1.667111
78	0.46944949	8.82686710	4.14376826		78.00000000	0.44025641	3.88608482	1.688586
79	0.47956869	8.81875040	4.22919658		79.00000000	0.43468354	3.83336568	1.709963
80	0.48940876	8.78936200	4.30159076		80.00000000	0.42925000	3.77283364	1.731323
81	0.49954209	8.77085780	4.38141264		81.00000000	0.42395062	3.71841058	1.752700
82	0.50936580	8.74794960	4.45590635		82.00000000	0.41878049	3.66347060	1.774180
83	0.51948130	8.68238830	4.51033836		83.00000000	0.41373494	3.59220740	1.795544
84	0.52928340	8.63753990	4.57170649		84.00000000	0.40880952	3.53110857	1.816881
85	0.53940111	8.52753640	4.59976260		85.00000000	0.40400000	3.44512471	1.838258
86	0.54953593	8.39477440	4.61323016		86.00000000	0.39930233	3.35205294	1.859730
87	0.55933434	8.22578140	4.60096201		87.00000000	0.39471264	3.24681992	1.881109
88	0.56947285	7.96089120	4.53351140		88.00000000	0.39022727	3.10655686	1.902480
89	0.57929063	7.61251930	4.40986110		89.00000000	0.38584270	2.93723497	1.923868
90	0.58940607	7.16677670	4.22414169		90.00000000	0.38155556	2.73452347	1.945358
91	0.59920299	6.56607870	3.93441399		91.00000000	0.37736264	2.47779278	1.966753
92	0.60929245	5.78641130	3.52561672		92.00000000	0.37326087	2.15984091	1.988217
93	0.61909008	4.84900670	3.00197195		93.00000000	0.36924731	1.79048269	2.009622
94	0.62922418	3.64907740	2.29608773		94.00000000	0.36531915	1.33307785	2.031106
95	0.63935673	2.21454790	1.41588610		95.00000000	0.36147368	0.80050079	2.052477
96	0.64907479	0.58218396	0.37788093		96.00000000	0.35770833	0.20825205	2.073854
97	0.65916640	-1.40749790	-0.92777532		97.00000000	0.35402062	-0.49828328	2.095208
98	0.66892242	-3.59216550	-2.40288004		98.00000000	0.35040816	-1.25872412	2.116680
99	0.67902076	-6.22734360	-4.22849558		99.00000000	0.34686869	-2.16007050	2.138062
100	0.68900967	-9.16437530	-6.31434320		100.00000000	0.34340000	-3.14704648	2.159492
101	0.69152534	-10.00034600	-6.91549267		101.00000000	0.34000000	-3.40011764	2.180843
19:56 02/04/2018
Test Lot:	JK-PERC
Recipe:	Recipe_YJX-LID
Cell Name:	1-5-5h
Test Order:	3
Test Condition:	Light
1	-0.29980698	8.87689500	-2.66135508		1.00000000	34.34000000	304.83257430	0.000000
2	-0.28997704	8.87000750	-2.57209852		2.00000000	17.17000000	152.29802878	0.061723
3	-0.27983519	8.87187000	-2.48266143		3.00000000	11.44666667	101.55333860	0.083271
4	-0.27004990	8.86371420	-2.39364513		4.00000000	8.58500000	76.09498641	0.104677
5	-0.25988203	8.86837580	-2.30473151		5.00000000	6.86800000	60.90800499	0.126020
6	-0.24972160	8.86993600	-2.21501461		6.00000000	5.72333333	50.76560037	0.147383
7	-0.23991099	8.86481950	-2.12676762		7.00000000	4.90571429	43.48827166	0.168873
8	-0.22975577	8.86189080	-2.03607054		8.00000000	4.29250000	38.03966626	0.190257
9	-0.21990125	8.86344430	-1.94908248		9.00000000	3.81555556	33.81896414	0.211612
10	-0.20977877	8.86582090	-1.85986100		10.00000000	3.43400000	30.44522897	0.232994
11	-0.19994360	8.86599060	-1.77269808		11.00000000	3.12181818	27.67801065	0.254470
12	-0.18978988	8.85720630	-1.68100812		12.00000000	2.86166667	25.34637203	0.275857
13	-0.17999788	8.87561990	-1.59759277		13.00000000	2.64153846	23.44529134	0.297212
14	-0.16986200	8.86404130	-1.50566378		14.00000000	2.45285714	21.74222702	0.318584
15	-0.16004246	8.87744050	-1.42076742		15.00000000	2.28933333	20.32342045	0.340057
16	-0.14988725	8.87148950	-1.32972316		16.00000000	2.14625000	19.04043434	0.361423
17	-0.13973202	8.85699940	-1.23760642		17.00000000	2.02000000	17.89113879	0.382770
18	-0.12992066	8.86946870	-1.15232723		18.00000000	1.90777778	16.92097529	0.404144
19	-0.11974981	8.85701080	-1.06062536		19.00000000	1.80736842	16.00788162	0.425631
20	-0.10997494	8.86766430	-0.97522085		20.00000000	1.71700000	15.22577960	0.446999
21	-0.09979887	8.87742710	-0.88595722		21.00000000	1.63523810	14.51670698	0.468348
22	-0.09001283	8.87451650	-0.79882031		22.00000000	1.56090909	13.85231348	0.489723
23	-0.07984272	8.86445520	-0.70776225		23.00000000	1.49304348	13.23501702	0.511196
24	-0.07000531	8.86765290	-0.62078282		24.00000000	1.43083333	12.68813336	0.532581
25	-0.05985977	8.86486430	-0.53064875		25.00000000	1.37360000	12.17677760	0.553949
26	-0.04970381	8.87551780	-0.44114702		26.00000000	1.32076923	11.72251082	0.575320
27	-0.03988948	8.86338900	-0.35355595		27.00000000	1.27185185	11.27291771	0.596801
28	-0.02976403	8.87189480	-0.26406333		28.00000000	1.22642857	10.88074527	0.618175
29	-0.01991620	8.87911420	-0.17683824		29.00000000	1.18413793	10.51409592	0.639565
30	-0.00980341	8.86053370	-0.08686343		30.00000000	1.14466667	10.14235758	0.660915
31	-0.00060759	8.86550520	-0.00538660		31.00000000	1.10774194	9.82069189	0.682508
32	0.00951914	8.86997410	0.08443451		32.00000000	1.07312500	9.51859096	0.703890
33	0.01933989	8.86629300	0.17147310		33.00000000	1.04060606	9.22631823	0.725277
34	0.02949333	8.86654280	0.26150387		34.00000000	1.01000000	8.95520823	0.746760
35	0.03931483	8.85875610	0.34828045		35.00000000	0.98114286	8.69170527	0.768139
36	0.04946975	8.87523940	0.43905591		36.00000000	0.95388889	8.46599225	0.789486
37	0.05927637	8.85836410	0.52509162		37.00000000	0.92810811	8.22151955	0.810863
38	0.06942311	8.87611390	0.61620742		38.00000000	0.90368421	8.02120398	0.832358
39	0.07958400	8.85428050	0.70465902		39.00000000	0.88051282	7.79630750	0.853730
40	0.08939655	8.86516280	0.79251498		40.00000000	0.85850000	7.61074226	0.875088
41	0.09952990	8.87119100	0.88294875		41.00000000	0.83756098	7.43016339	0.896469
42	0.10936405	8.85538670	0.96846095		42.00000000	0.81761905	7.24033284	0.917942
43	0.11951451	8.88122750	1.06143555		43.00000000	0.79860465	7.09258959	0.939341
44	0.12933674	8.84688570	1.14422736		44.00000000	0.78045455	6.90459216	0.960689
45	0.13949764	8.86958220	1.23728578		45.00000000	0.76311111	6.76847673	0.982066
46	0.14929755	8.85120300	1.32146292		46.00000000	0.74652174	6.60761546	1.003548
47	0.15946141	8.86915970	1.41428871		47.00000000	0.73063830	6.48014775	1.024919
48	0.16960666	8.85943220	1.50261870		48.00000000	0.71541667	6.33818545	1.046262
49	0.17938127	8.86257650	1.58978023		49.00000000	0.70081633	6.21103831	1.067650
50	0.18958384	8.86241630	1.68017091		50.00000000	0.68680000	6.08670751	1.089131
51	0.19936439	8.87501050	1.76936105		51.00000000	0.67333333	5.97584040	1.110505
52	0.20947467	8.85795880	1.85551800		52.00000000	0.66038462	5.84965972	1.131859
53	0.21932444	8.86670490	1.94468509		53.00000000	0.64792453	5.74495559	1.153226
54	0.22946523	8.86251640	2.03363936		54.00000000	0.63592593	5.63590395	1.174713
55	0.23929343	8.86382100	2.12105413		55.00000000	0.62436364	5.53424751	1.196087
56	0.24944240	8.86912160	2.21233498		56.00000000	0.61321429	5.43867207	1.217450
57	0.25957203	8.86041830	2.29991676		57.00000000	0.60245614	5.33801341	1.238820
58	0.26941213	8.87027650	2.38976009		58.00000000	0.59206897	5.25181543	1.260295
59	0.27952090	8.86204050	2.47712554		59.00000000	0.58203390	5.15800798	1.281676
60	0.28936398	8.85989950	2.56373578		60.00000000	0.57233333	5.07081581	1.303065
61	0.29951370	8.85778050	2.65302661		61.00000000	0.56295082	4.98649479	1.324413
62	0.30931959	8.85984800	2.74052455		62.00000000	0.55387097	4.90721259	1.345890
63	0.31947377	8.86941530	2.83354554		63.00000000	0.54507937	4.83453526	1.367277
64	0.32930642	8.85468770	2.91590551		64.00000000	0.53656250	4.75109337	1.388670
65	0.33944869	8.85905170	3.00719349		65.00000000	0.52830769	4.68030516	1.410137
66	0.34924489	8.86465740	3.09593630		66.00000000	0.52030303	4.61230811	1.431537
67	0.35941470	8.85868260	3.18394075		67.00000000	0.51253731	4.54040538	1.452880
68	0.36957186	8.85967450	3.27428638		68.00000000	0.50500000	4.47413562	1.474294
69	0.37939113	8.86221220	3.36224470		69.00000000	0.49768116	4.41055604	1.495783
70	0.38953862	8.85368160	3.44885091		70.00000000	0.49057143	4.34336323	1.517154
71	0.39935192	8.85742950	3.53723148		71.00000000	0.48366197	4.28400182	1.538508
72	0.40951058	8.84915260	3.62382161		72.00000000	0.47694444	4.22055417	1.559885
73	0.41932315	8.85078240	3.71133796		73.00000000	0.47041096	4.16350504	1.581359
74	0.42946988	8.85411830	3.80257712		74.00000000	0.46405405	4.10878949	1.602752
75	0.43928394	8.84232810	3.88429273		75.00000000	0.45786667	4.04860729	1.624094
76	0.44943962	8.83465670	3.97064475		76.00000000	0.45184211	3.99186988	1.645466
77	0.45959380	8.83612730	4.06102932		77.00000000	0.44597403	3.94068327	1.666946
78	0.46947780	8.83754920	4.14903316		78.00000000	0.44025641	3.89078769	1.688328
79	0.47960520	8.79620840	4.21870729		79.00000000	0.43468354	3.82356704	1.709671
80	0.48940289	8.80648330	4.30991838		80.00000000	0.42925000	3.78018296	1.731051
81	0.49949604	8.76360130	4.37738415		81.00000000	0.42395062	3.71533418	1.752521
82	0.50935471	8.74190810	4.45273207		82.00000000	0.41878049	3.66094054	1.773903
83	0.51950818	8.69095040	4.51501982		83.00000000	0.41373494	3.59574984	1.795284
84	0.52929020	8.62865920	4.56706475		84.00000000	0.40880952	3.52747806	1.816660
85	0.53942358	8.54207900	4.60779883		85.00000000	0.40400000	3.45099992	1.838133
86	0.54955620	8.40268610	4.61774824		86.00000000	0.39930233	3.35521210	1.859507
87	0.55936801	8.24518010	4.61208998		87.00000000	0.39471264	3.25447683	1.880872
88	0.56950355	7.97610330	4.54241914		88.00000000	0.39022727	3.11249304	1.902240
89	0.57931316	7.65362500	4.43384568		89.00000000	0.38584270	2.95309531	1.923855
90	0.58941674	7.18674900	4.23599017		90.00000000	0.38155556	2.74214401	1.945248
91	0.59920919	6.60311170	3.95664521		91.00000000	0.37736264	2.49176765	1.966654
92	0.60931206	5.82668260	3.55026798		92.00000000	0.37326087	2.17487261	1.988102
93	0.61911863	4.88017610	3.02140794		93.00000000	0.36924731	1.80199191	2.009595
94	0.62920213	3.68085170	2.31599973		94.00000000	0.36531915	1.34468561	2.030985
95	0.63935333	2.23669600	1.43003904		95.00000000	0.36147368	0.80850674	2.052373
96	0.64906317	0.58536321	0.37993770		96.00000000	0.35770833	0.20938930	2.073859
97	0.65920472	-1.42337020	-0.93829235		97.00000000	0.35402062	-0.50390240	2.095286
98	0.66894585	-3.65631060	-2.44587380		98.00000000	0.35040816	-1.28120108	2.116647
99	0.67903602	-6.34937620	-4.31145514		99.00000000	0.34686869	-2.20239978	2.138023
100	0.68896317	-9.36630060	-6.45303615		100.00000000	0.34340000	-3.21638763	2.159510
101	0.69087970	-10.00031700	-6.90901601		101.00000000	0.34000000	-3.40010778	2.180887
19:56 02/04/2018
Test Lot:	JK-PERC
Recipe:	Recipe_YJX-LID
Cell Name:	1-5-5h
Test Order:	4
Test Condition:	Light
1	-0.29984501	8.85852430	-2.65618431		1.00000000	34.34000000	304.20172446	0.000000
2	-0.28998289	8.86151700	-2.56968831		2.00000000	17.17000000	152.15224689	0.061812
3	-0.27986693	8.86673360	-2.48150551		3.00000000	11.44666667	101.49454394	0.083243
4	-0.27007625	8.85738280	-2.39216873		4.00000000	8.58500000	76.04063134	0.104742
5	-0.25987843	8.86650850	-2.30421431		5.00000000	6.86800000	60.89518038	0.126122
6	-0.24973196	8.86168670	-2.21304639		6.00000000	5.72333333	50.71838688	0.147486
7	-0.23994872	8.87267780	-2.12898768		7.00000000	4.90571429	43.52682224	0.168858
8	-0.22978960	8.86885260	-2.03797009		8.00000000	4.29250000	38.06954979	0.190330
9	-0.21997435	8.85233500	-1.94728664		9.00000000	3.81555556	33.77657599	0.211706
10	-0.20980482	8.87584210	-1.86219445		10.00000000	3.43400000	30.47964177	0.233051
11	-0.19997171	8.86840530	-1.77343017		11.00000000	3.12181818	27.68554891	0.254428
12	-0.18983491	8.86120320	-1.68216571		12.00000000	2.86166667	25.35780982	0.275921
13	-0.18008666	8.87822630	-1.59885012		13.00000000	2.64153846	23.45217624	0.297307
14	-0.16994762	8.86432360	-1.50647070		14.00000000	2.45285714	21.74291946	0.318669
15	-0.16008548	8.86913010	-1.41981895		15.00000000	2.28933333	20.30439518	0.340043
16	-0.14999038	8.85842420	-1.32867841		16.00000000	2.14625000	19.01239294	0.361510
17	-0.13981637	8.87838650	-1.24134377		17.00000000	2.02000000	17.93434073	0.382912
18	-0.13000336	8.86370090	-1.15231090		18.00000000	1.90777778	16.90997161	0.404283
19	-0.11988071	8.88010690	-1.06455352		19.00000000	1.80736842	16.04962479	0.425620
20	-0.11003644	8.86477950	-0.97544878		20.00000000	1.71700000	15.22082640	0.447103
21	-0.09984085	8.87271600	-0.88585951		21.00000000	1.63523810	14.50900321	0.468466
22	-0.09005909	8.85171890	-0.79717778		22.00000000	1.56090909	13.81672850	0.489847
23	-0.07989924	8.87630080	-0.70920966		23.00000000	1.49304348	13.25270302	0.511275
24	-0.07011004	8.87797450	-0.62243513		24.00000000	1.43083333	12.70290185	0.532734
25	-0.05995836	8.86211400	-0.53135783		25.00000000	1.37360000	12.17299979	0.554117
26	-0.04983050	8.86066720	-0.44153151		26.00000000	1.32076923	11.70289660	0.575469
27	-0.03995199	8.86975100	-0.35436421		27.00000000	1.27185185	11.28100923	0.596825
28	-0.02983158	8.86245440	-0.26438097		28.00000000	1.22642857	10.86916729	0.618303
29	-0.02002005	8.87988190	-0.17777567		29.00000000	1.18413793	10.51500498	0.639686
30	-0.00982669	8.86396310	-0.08710343		30.00000000	1.14466667	10.14628310	0.661041
31	-0.00068058	8.86713220	-0.00603481		31.00000000	1.10774194	9.82249419	0.682530
32	0.00948280	8.85719590	0.08399098		32.00000000	1.07312500	9.50487835	0.704013
33	0.01931935	8.85863110	0.17114296		33.00000000	1.04060606	9.21834521	0.725372
34	0.02943873	8.87666130	0.26131762		34.00000000	1.01000000	8.96542791	0.746759
35	0.03927528	8.85903840	0.34794122		35.00000000	0.98114286	8.69198225	0.768120
36	0.04944230	8.85986800	0.43805224		36.00000000	0.95388889	8.45132964	0.789596
37	0.05923196	8.86959550	0.52536352		37.00000000	0.92810811	8.23194350	0.810982
38	0.06941758	8.86732390	0.61554818		38.00000000	0.90368421	8.01326060	0.832369
39	0.07954516	8.87547490	0.70600103		39.00000000	0.88051282	7.81496944	0.853854
40	0.08933853	8.86676880	0.79214413		40.00000000	0.85850000	7.61212101	0.875227
41	0.09952714	8.86672020	0.88247926		41.00000000	0.83756098	7.42641882	0.896588
42	0.10934433	8.86650470	0.96950202		42.00000000	0.81761905	7.24942313	0.917969
43	0.11948977	8.86492440	1.05926778		43.00000000	0.79860465	7.07956986	0.939459
44	0.12930697	8.85696410	1.14526719		44.00000000	0.78045455	6.91245789	0.960831
45	0.13942337	8.86545850	1.23605210		45.00000000	0.76311111	6.76532989	0.982198
46	0.14924727	8.86210920	1.32264560		46.00000000	0.74652174	6.61575717	1.003572
47	0.15941949	8.86106780	1.41262691		47.00000000	0.73063830	6.47423549	1.025055
48	0.16955079	8.87194350	1.50424503		48.00000000	0.71541667	6.34713625	1.046450
49	0.17938139	8.84836290	1.58723164		49.00000000	0.70081633	6.20107718	1.067798
50	0.18953352	8.87930490	1.68292591		50.00000000	0.68680000	6.09830661	1.089171
51	0.19930755	8.86595920	1.76705261		51.00000000	0.67333333	5.96974586	1.110651
52	0.20946564	8.85047250	1.85386989		52.00000000	0.66038462	5.84471588	1.132021
53	0.21925604	8.87253280	1.94535641		53.00000000	0.64792453	5.74873163	1.153370
54	0.22940147	8.87241740	2.03534559		54.00000000	0.63592593	5.64220025	1.174760
55	0.23921643	8.84825800	2.11664869		55.00000000	0.62436364	5.52453054	1.196248
56	0.24938123	8.86761950	2.21141786		56.00000000	0.61321429	5.43775096	1.217619
57	0.25954080	8.86445520	2.30068779		57.00000000	0.60245614	5.34044547	1.238956
58	0.26935950	8.85974310	2.38645597		58.00000000	0.59206897	5.24557893	1.260325
59	0.27950865	8.85573100	2.47525342		59.00000000	0.58203390	5.15433564	1.281802
60	0.28933328	8.87590890	2.56809584		60.00000000	0.57233333	5.07997853	1.303181
61	0.29948094	8.86088280	2.65366551		61.00000000	0.56295082	4.98824124	1.324538
62	0.30930039	8.86420820	2.74170305		62.00000000	0.55387097	4.90962757	1.345910
63	0.31946144	8.86674690	2.83258373		63.00000000	0.54507937	4.83308077	1.367392
64	0.32928088	8.86451050	2.91891382		64.00000000	0.53656250	4.75636392	1.388784
65	0.33941513	8.86007500	3.00724351		65.00000000	0.52830769	4.68084578	1.410179
66	0.34923309	8.87238410	3.09853011		66.00000000	0.52030303	4.61632833	1.431527
67	0.35938224	8.85186960	3.18120473		67.00000000	0.51253731	4.53691346	1.453013
68	0.36956042	8.85841940	3.27372119		68.00000000	0.50500000	4.47350180	1.474407
69	0.37939548	8.84981540	3.35757996		69.00000000	0.49768116	4.40438639	1.495787
70	0.38950816	8.86616800	3.45344478		70.00000000	0.49057143	4.34948870	1.517284
71	0.39933580	8.84705640	3.53294635		71.00000000	0.48366197	4.27898474	1.538669
72	0.40948272	8.85272410	3.62503754		72.00000000	0.47694444	4.22225758	1.560012
73	0.41931555	8.84424110	3.70852782		73.00000000	0.47041096	4.16042794	1.581396
74	0.42946172	8.84780220	3.79979235		74.00000000	0.46405405	4.10585848	1.602890
75	0.43926850	8.84442810	3.88507866		75.00000000	0.45786667	4.04956881	1.624262
76	0.44942287	8.83933640	3.97259993		76.00000000	0.45184211	3.99398437	1.645626
77	0.45956382	8.83372400	4.05965995		77.00000000	0.44597403	3.93961146	1.667006
78	0.46940932	8.82624340	4.14312091		78.00000000	0.44025641	3.88581024	1.688473
79	0.47955623	8.80605890	4.22300041		79.00000000	0.43468354	3.82784889	1.709865
80	0.48933175	8.80582050	4.30896756		80.00000000	0.42925000	3.77989845	1.731215
81	0.49952036	8.75944230	4.37551977		81.00000000	0.42395062	3.71357097	1.752569
82	0.50930405	8.74895860	4.45588005		82.00000000	0.41878049	3.66389315	1.774075
83	0.51944202	8.69141670	4.51468705		83.00000000	0.41373494	3.59594276	1.795460
84	0.52925479	8.63573170	4.57050237		84.00000000	0.40880952	3.53036936	1.816821
85	0.53938758	8.53423790	4.60326193		85.00000000	0.40400000	3.44783211	1.838192
86	0.54950398	8.40795900	4.62020693		86.00000000	0.39930233	3.35731758	1.859665
87	0.55928618	8.22840210	4.60203158		87.00000000	0.39471264	3.24785435	1.881063
88	0.56945246	7.98324870	4.54608061		88.00000000	0.39022727	3.11528137	1.902417
89	0.57923543	7.65054320	4.43146568		89.00000000	0.38584270	2.95190622	1.923783
90	0.58937490	7.17337040	4.22780446		90.00000000	0.38155556	2.73703933	1.945255
91	0.59916455	6.61062240	3.96085060		91.00000000	0.37736264	2.49460190	1.966630
92	0.60928392	5.81290630	3.54171034		92.00000000	0.37326087	2.16973046	1.988104
93	0.61908102	4.87604570	3.01866735		93.00000000	0.36924731	1.80046677	2.009503
94	0.62921679	3.67456130	2.31209567		94.00000000	0.36531915	1.34238761	2.030993
95	0.63934958	2.22546840	1.42285229		95.00000000	0.36147368	0.80444826	2.052415
96	0.64906108	0.57061440	0.37036360		96.00000000	0.35770833	0.20411353	2.073816
97	0.65915740	-1.43176750	-0.94376014		97.00000000	0.35402062	-0.50687522	2.095168
98	0.66889942	-3.66563990	-2.45194440		98.00000000	0.35040816	-1.28447014	2.116634
99	0.67903000	-6.35475920	-4.31507214		99.00000000	0.34686869	-2.20426698	2.138023
100	0.68896401	-9.37214470	-6.45707039		100.00000000	0.34340000	-3.21839449	2.159401
101	0.69080317	-10.00042700	-6.90832667		101.00000000	0.34000000	-3.40014518	2.180888
