# Supplementary material for: Study on the Electrical Injection Regeneration of Industrialized B-Doped Czochralski Silicon PERC Solar Cells
Source: Hindawi journal article supplement (doi:10.1155/2019/5357370), 2019-06-20
Supplement: f1 [file 5357370.f1.zip › section3.2/IVRawData_1-5-6h.csv]

21:01 02/04/2018
Test Lot:	JK-PERC
Recipe:	Recipe_YJX-LID
Cell Name:	1-5-6h
Test Order:	2
Test Condition:	Light
1	-0.29986757	8.83812520	-2.65026713		1.00000000	34.34000000	303.50121937	0.000000
2	-0.29008248	8.85197160	-2.56780187		2.00000000	17.17000000	151.98835237	0.061791
3	-0.27989843	8.84949020	-2.47695841		3.00000000	11.44666667	101.29716449	0.083216
4	-0.27008954	8.85763740	-2.39235521		4.00000000	8.58500000	76.04281708	0.104700
5	-0.25993082	8.84427830	-2.29890051		5.00000000	6.86800000	60.74250336	0.126081
6	-0.24977729	8.85626600	-2.21209412		6.00000000	5.72333333	50.68736241	0.147444
7	-0.23996019	8.84324360	-2.12202641		7.00000000	4.90571429	43.38242646	0.168821
8	-0.22981040	8.84515760	-2.03270921		8.00000000	4.29250000	37.96783900	0.190343
9	-0.21997246	8.83503150	-1.94346361		9.00000000	3.81555556	33.71055352	0.211723
10	-0.20982563	8.85251240	-1.85748399		10.00000000	3.43400000	30.39952758	0.233085
11	-0.20000333	8.83627130	-1.76728368		11.00000000	3.12181818	27.58523240	0.254462
12	-0.18986544	8.84442710	-1.67925104		12.00000000	2.86166667	25.30980222	0.275958
13	-0.18005578	8.84041980	-1.59176868		13.00000000	2.64153846	23.35230892	0.297349
14	-0.16992906	8.85573480	-1.50484669		14.00000000	2.45285714	21.72185236	0.318702
15	-0.16010749	8.83759310	-1.41496485		15.00000000	2.28933333	20.23219647	0.340055
16	-0.14994505	8.85158820	-1.32725184		16.00000000	2.14625000	18.99772117	0.361530
17	-0.13981460	8.84361270	-1.23646617		17.00000000	2.02000000	17.86409765	0.382897
18	-0.12997295	8.83826730	-1.14873567		18.00000000	1.90777778	16.86144995	0.404289
19	-0.11982836	8.84772780	-1.06020871		19.00000000	1.80736842	15.99110382	0.425636
20	-0.10999414	8.85131450	-0.97359273		20.00000000	1.71700000	15.19770700	0.447120
21	-0.09984658	8.84783460	-0.88342602		21.00000000	1.63523810	14.46831620	0.468501
22	-0.09002873	8.84643270	-0.79643313		22.00000000	1.56090909	13.80847722	0.489879
23	-0.07989010	8.84357550	-0.70651415		23.00000000	1.49304348	13.20384272	0.511349
24	-0.07007226	8.85206700	-0.62028430		24.00000000	1.43083333	12.66583253	0.532736
25	-0.05993810	8.82794380	-0.52913014		25.00000000	1.37360000	12.12606360	0.554078
26	-0.04979500	8.86669640	-0.44151713		26.00000000	1.32076923	11.71085978	0.575445
27	-0.03997715	8.84166620	-0.35346463		27.00000000	1.27185185	11.24528953	0.596929
28	-0.02982438	8.85133270	-0.26398553		28.00000000	1.22642857	10.85552732	0.618309
29	-0.02000430	8.84303860	-0.17689883		29.00000000	1.18413793	10.47137743	0.639665
30	-0.00986344	8.85003570	-0.08729180		30.00000000	1.14466667	10.13034086	0.661048
31	-0.00063805	8.83721730	-0.00563855		31.00000000	1.10774194	9.78935620	0.682637
32	0.00951601	8.84319690	0.08415191		32.00000000	1.07312500	9.48985567	0.704013
33	0.01930752	8.84760090	0.17082523		33.00000000	1.04060606	9.20686712	0.725363
34	0.02945405	8.84930990	0.26064801		34.00000000	1.01000000	8.93780300	0.746728
35	0.03926789	8.84595870	0.34736217		35.00000000	0.98114286	8.67914919	0.768207
36	0.04942559	8.85680010	0.43775254		36.00000000	0.95388889	8.44840321	0.789578
37	0.05927441	8.84039020	0.52400890		37.00000000	0.92810811	8.20483782	0.810923
38	0.06938819	8.84799000	0.61394599		38.00000000	0.90368421	7.99578886	0.832305
39	0.07954662	8.84485050	0.70357799		39.00000000	0.88051282	7.78800426	0.853775
40	0.08934558	8.84231570	0.79002184		40.00000000	0.85850000	7.59112803	0.875158
41	0.09950551	8.84776310	0.88040114		41.00000000	0.83756098	7.41054109	0.896525
42	0.10934763	8.84638790	0.96733155		42.00000000	0.81761905	7.23297525	0.917905
43	0.11951724	8.84033680	1.05657266		43.00000000	0.79860465	7.05993409	0.939403
44	0.12932363	8.84459210	1.14381476		44.00000000	0.78045455	6.90280211	0.960791
45	0.13948059	8.84425830	1.23360237		45.00000000	0.76311111	6.74915178	0.982163
46	0.14926094	8.84432700	1.32011256		46.00000000	0.74652174	6.60248237	1.003517
47	0.15940672	8.83383660	1.40817292		47.00000000	0.73063830	6.45433934	1.024993
48	0.16956143	8.84367560	1.49954628		48.00000000	0.71541667	6.32691292	1.046357
49	0.17940356	8.84246060	1.58636891		49.00000000	0.70081633	6.19694076	1.067738
50	0.18955158	8.84032340	1.67569727		50.00000000	0.68680000	6.07153411	1.089090
51	0.19932374	8.84077550	1.76217644		51.00000000	0.67333333	5.95278884	1.110555
52	0.20947102	8.83482070	1.85063890		52.00000000	0.66038462	5.83437967	1.131937
53	0.21929826	8.84205530	1.93904734		53.00000000	0.64792453	5.72898451	1.153325
54	0.22945595	8.83738420	2.02779039		54.00000000	0.63592593	5.61992173	1.174800
55	0.23925789	8.84182830	2.11547718		55.00000000	0.62436364	5.52051607	1.196199
56	0.24940738	8.84489060	2.20598099		56.00000000	0.61321429	5.42381327	1.217542
57	0.25956136	8.83822060	2.29406056		57.00000000	0.60245614	5.32464027	1.238909
58	0.26937297	8.83925340	2.38105594		58.00000000	0.59206897	5.23344762	1.260403
59	0.27953142	8.85719870	2.47586533		59.00000000	0.58203390	5.15518989	1.281784
60	0.28930804	8.83990570	2.55745579		60.00000000	0.57233333	5.05937270	1.303135
61	0.29948360	8.84021470	2.64749932		61.00000000	0.56295082	4.97660611	1.324511
62	0.30932051	8.84452060	2.73579162		62.00000000	0.55387097	4.89872318	1.345992
63	0.31947449	8.84392450	2.82540827		63.00000000	0.54507937	4.82064075	1.367373
64	0.32926822	8.83790300	2.91004059		64.00000000	0.53656250	4.74208733	1.388724
65	0.33940434	8.83554650	2.99882283		65.00000000	0.52830769	4.66788718	1.410081
66	0.34926358	8.83608910	3.08612411		66.00000000	0.52030303	4.59744393	1.431549
67	0.35939893	8.84317490	3.17822760		67.00000000	0.51253731	4.53245711	1.452926
68	0.36955217	8.83553700	3.26519187		68.00000000	0.50500000	4.46194619	1.474275
69	0.37940621	8.82890320	3.34974070		69.00000000	0.49768116	4.39397878	1.495645
70	0.38954306	8.83773140	3.44267693		70.00000000	0.49057143	4.33553852	1.517119
71	0.39937028	8.82127670	3.52295575		71.00000000	0.48366197	4.26651608	1.538487
72	0.40949970	8.84010980	3.62002231		72.00000000	0.47694444	4.21624126	1.559843
73	0.41928825	8.82387640	3.69974769		73.00000000	0.47041096	4.15084816	1.581211
74	0.42944667	8.83391000	3.79369323		74.00000000	0.46405405	4.09941175	1.602686
75	0.43930742	8.82782650	3.87812968		75.00000000	0.45786667	4.04196749	1.624071
76	0.44943234	8.81184580	3.96032848		76.00000000	0.45184211	3.98156296	1.645444
77	0.45958185	8.80601120	4.04708292		77.00000000	0.44597403	3.92725227	1.666806
78	0.46947607	8.80419540	4.13335906		78.00000000	0.44025641	3.87610346	1.688288
79	0.47958615	8.78284930	4.21213288		79.00000000	0.43468354	3.81776006	1.709669
80	0.48941934	8.76094720	4.28777700		80.00000000	0.42925000	3.76063659	1.731055
81	0.49953386	8.74253940	4.36719445		81.00000000	0.42395062	3.70640498	1.752396
82	0.50935960	8.71956630	4.44139480		82.00000000	0.41878049	3.65158423	1.773860
83	0.51951361	8.65466790	4.49621776		83.00000000	0.41373494	3.58073850	1.795259
84	0.52926046	8.59735200	4.55023847		84.00000000	0.40880952	3.51467938	1.816640
85	0.53937346	8.48876950	4.57861698		85.00000000	0.40400000	3.42946288	1.838113
86	0.54956168	8.35844040	4.59347855		86.00000000	0.39930233	3.33754469	1.859489
87	0.55937481	8.15687750	4.56275180		87.00000000	0.39471264	3.21962268	1.880836
88	0.56947589	7.89707040	4.49719119		88.00000000	0.39022727	3.08165224	1.902210
89	0.57925928	7.54654410	4.37140570		89.00000000	0.38584270	2.91177893	1.923699
90	0.58942735	7.06926730	4.16681949		90.00000000	0.38155556	2.69731821	1.945078
91	0.59921068	6.48621420	3.88660882		91.00000000	0.37736264	2.44765490	1.966430
92	0.60929173	5.69273040	3.46853355		92.00000000	0.37326087	2.12487350	1.987912
93	0.61913013	4.73180770	2.92960472		93.00000000	0.36924731	1.74720727	2.009408
94	0.62921262	3.57623430	2.25021175		94.00000000	0.36531915	1.30646687	2.030805
95	0.63934875	2.14635540	1.37226964		95.00000000	0.36147368	0.77585099	2.052150
96	0.64907551	0.56003308	0.36350376		96.00000000	0.35770833	0.20032850	2.073517
97	0.65919900	-1.35817060	-0.89530470		97.00000000	0.35402062	-0.48082040	2.095007
98	0.66892797	-3.46401810	-2.31717860		98.00000000	0.35040816	-1.21382022	2.116391
99	0.67903727	-5.98842380	-4.06636295		99.00000000	0.34686869	-2.07719670	2.137744
100	0.68899477	-8.76723000	-6.04057562		100.00000000	0.34340000	-3.01066678	2.159134
101	0.69299370	-10.00022700	-6.93009431		101.00000000	0.34000000	-3.40007718	2.180614
21:02 02/04/2018
Test Lot:	JK-PERC
Recipe:	Recipe_YJX-LID
Cell Name:	1-5-6h
Test Order:	3
Test Condition:	Light
1	-0.29986519	8.85922050	-2.65657184		1.00000000	34.34000000	304.22563197	0.000000
2	-0.29007936	8.84082790	-2.56454170		2.00000000	17.17000000	151.79701504	0.061803
3	-0.27992883	8.83692170	-2.47370915		3.00000000	11.44666667	101.15329706	0.083222
4	-0.27009535	8.84368990	-2.38863952		4.00000000	8.58500000	75.92307779	0.104712
5	-0.25992399	8.84294130	-2.29849259		5.00000000	6.86800000	60.73332085	0.126137
6	-0.24974516	8.83681300	-2.20695128		6.00000000	5.72333333	50.57602640	0.147491
7	-0.23993923	8.83412740	-2.11965373		7.00000000	4.90571429	43.33770499	0.168875
8	-0.22981550	8.83606050	-2.03066366		8.00000000	4.29250000	37.92878970	0.190363
9	-0.21996640	8.85212140	-1.94716928		9.00000000	3.81555556	33.77576099	0.211735
10	-0.20982479	8.83485890	-1.85377241		10.00000000	3.43400000	30.33890546	0.233106
11	-0.19999057	8.84902190	-1.76972093		11.00000000	3.12181818	27.62503746	0.254465
12	-0.18985790	8.84543420	-1.67937556		12.00000000	2.86166667	25.31268420	0.275939
13	-0.18007207	8.83578300	-1.59107773		13.00000000	2.64153846	23.34006063	0.297303
14	-0.16992973	8.85230350	-1.50426954		14.00000000	2.45285714	21.71343587	0.318684
15	-0.16012603	8.84321120	-1.41602830		15.00000000	2.28933333	20.24505817	0.340042
16	-0.14999038	8.83909230	-1.32577881		16.00000000	2.14625000	18.97090185	0.361520
17	-0.13981082	8.84514520	-1.23664700		17.00000000	2.02000000	17.86719330	0.382891
18	-0.13000265	8.83100030	-1.14805344		18.00000000	1.90777778	16.84758613	0.404281
19	-0.11985063	8.85986330	-1.06186020		19.00000000	1.80736842	16.01303714	0.425756
20	-0.11004768	8.84103870	-0.97293580		20.00000000	1.71700000	15.18006345	0.447147
21	-0.09988523	8.84419920	-0.88340490		21.00000000	1.63523810	14.46237145	0.468502
22	-0.09006962	8.84592820	-0.79674941		22.00000000	1.56090909	13.80768974	0.489870
23	-0.07993621	8.84459500	-0.70700337		23.00000000	1.49304348	13.20536488	0.511352
24	-0.07011242	8.83673100	-0.61956455		24.00000000	1.43083333	12.64388927	0.532734
25	-0.05995295	8.85231490	-0.53072237		25.00000000	1.37360000	12.15953975	0.554090
26	-0.04984261	8.84645370	-0.44093032		26.00000000	1.32076923	11.68412385	0.575463
27	-0.04000691	8.82754710	-0.35316285		27.00000000	1.27185185	11.22733213	0.596938
28	-0.02983479	8.85567090	-0.26420705		28.00000000	1.22642857	10.86084781	0.618314
29	-0.02002960	8.84355640	-0.17713289		29.00000000	1.18413793	10.47199058	0.639677
30	-0.00992596	8.83012580	-0.08764743		30.00000000	1.14466667	10.10755067	0.661057
31	-0.00064995	8.84416100	-0.00574829		31.00000000	1.10774194	9.79704802	0.682645
32	0.00949219	8.84504220	0.08395878		32.00000000	1.07312500	9.49183591	0.704042
33	0.01930156	8.84636400	0.17074861		33.00000000	1.04060606	9.20557999	0.725397
34	0.02944213	8.84052470	0.26028386		34.00000000	1.01000000	8.92892995	0.746768
35	0.03925299	8.84818650	0.34731777		35.00000000	0.98114286	8.68133498	0.768251
36	0.04939133	8.83916570	0.43657811		36.00000000	0.95388889	8.43158195	0.789628
37	0.05926396	8.82541940	0.52302933		37.00000000	0.92810811	8.19094330	0.810980
38	0.06938072	8.84905720	0.61395392		38.00000000	0.90368421	7.99675327	0.832357
39	0.07957339	8.83936600	0.70337827		39.00000000	0.88051282	7.78317509	0.853827
40	0.08934852	8.84335990	0.79014109		40.00000000	0.85850000	7.59202447	0.875210
41	0.09949727	8.85289570	0.88083899		41.00000000	0.83756098	7.41483996	0.896576
42	0.10934535	8.84162430	0.96679050		42.00000000	0.81761905	7.22908044	0.917937
43	0.11950304	8.84220980	1.05667095		43.00000000	0.79860465	7.06142987	0.939409
44	0.12930794	8.84082790	1.14318924		44.00000000	0.78045455	6.89986432	0.960780
45	0.13948871	8.83347700	1.23217031		45.00000000	0.76311111	6.74092445	0.982157
46	0.14926757	8.84308430	1.31998570		46.00000000	0.74652174	6.60155467	1.003520
47	0.15944982	8.83711340	1.40907614		47.00000000	0.73063830	6.45673349	1.024998
48	0.16957252	8.85218140	1.50108671		48.00000000	0.71541667	6.33299811	1.046375
49	0.17941166	8.84779260	1.58739716		49.00000000	0.70081633	6.20067751	1.067758
50	0.18954627	8.83828450	1.67526386		50.00000000	0.68680000	6.07013379	1.089233
51	0.19932587	8.84124180	1.76228821		51.00000000	0.67333333	5.95310281	1.110622
52	0.20947538	8.84632870	1.85308807		52.00000000	0.66038462	5.84197938	1.131992
53	0.21930261	8.83693120	1.93796208		53.00000000	0.64792453	5.72566448	1.153363
54	0.22943872	8.83905890	2.02802236		54.00000000	0.63592593	5.62098672	1.174836
55	0.23924810	8.84380340	2.11586316		55.00000000	0.62436364	5.52174925	1.196228
56	0.24936187	8.83897880	2.20410428		56.00000000	0.61321429	5.42018807	1.217581
57	0.25955826	8.84372710	2.29546242		57.00000000	0.60245614	5.32795769	1.238959
58	0.26933488	8.84852500	2.38321642		58.00000000	0.59206897	5.23893704	1.260438
59	0.27950448	8.83882520	2.47049124		59.00000000	0.58203390	5.14449589	1.281804
60	0.28932872	8.84251020	2.55839216		60.00000000	0.57233333	5.06086334	1.303172
61	0.29947600	8.83447170	2.64571225		61.00000000	0.56295082	4.97337308	1.324548
62	0.30930400	8.85116860	2.73770185		62.00000000	0.55387097	4.90240532	1.346028
63	0.31946242	8.83105180	2.82118918		63.00000000	0.54507937	4.81362411	1.367420
64	0.32927850	8.85277370	2.91502804		64.00000000	0.53656250	4.75006639	1.388773
65	0.33943245	8.83668420	2.99945737		65.00000000	0.52830769	4.66848824	1.410149
66	0.34923586	8.83258250	3.08465455		66.00000000	0.52030303	4.59561944	1.431621
67	0.35939133	8.83111380	3.17382573		67.00000000	0.51253731	4.52627534	1.453003
68	0.36952966	8.83685300	3.26547928		68.00000000	0.50500000	4.46261077	1.474343
69	0.37937477	8.83107190	3.35028587		69.00000000	0.49768116	4.39505810	1.495721
70	0.38950789	8.83447170	3.44109643		70.00000000	0.49057143	4.33393940	1.517202
71	0.39934555	8.83755870	3.52923974		71.00000000	0.48366197	4.27439107	1.538585
72	0.40949357	8.82538320	3.61393767		72.00000000	0.47694444	4.20921749	1.559959
73	0.41933790	8.83091550	3.70313756		73.00000000	0.47041096	4.15415943	1.581316
74	0.42947847	8.81864740	3.78741919		74.00000000	0.46405405	4.09232908	1.602789
75	0.43930945	8.82499890	3.87690541		75.00000000	0.45786667	4.04067283	1.624178
76	0.44947085	8.81476210	3.96197861		76.00000000	0.45184211	3.98288066	1.645555
77	0.45959282	8.81189350	4.04988298		77.00000000	0.44597403	3.92987562	1.666909
78	0.46945354	8.79601760	4.12932160		78.00000000	0.44025641	3.87250313	1.688378
79	0.47959560	8.78414730	4.21283839		79.00000000	0.43468354	3.81832428	1.709762
80	0.48940200	8.77026370	4.29218460		80.00000000	0.42925000	3.76463569	1.731149
81	0.49954998	8.74537280	4.36875081		81.00000000	0.42395062	3.70760620	1.752620
82	0.50936681	8.71488480	4.43907307		82.00000000	0.41878049	3.64962371	1.773992
83	0.51949251	8.66712190	4.50250491		83.00000000	0.41373494	3.58589116	1.795343
84	0.52927059	8.59716320	4.55022564		84.00000000	0.40880952	3.51460219	1.816727
85	0.53940821	8.51841450	4.59490272		85.00000000	0.40400000	3.44143946	1.838211
86	0.54949075	8.36507030	4.59652875		86.00000000	0.39930233	3.34019202	1.859571
87	0.55937749	8.20236680	4.58821935		87.00000000	0.39471264	3.23757788	1.880928
88	0.56948608	7.93180700	4.51705368		88.00000000	0.39022727	3.09520741	1.902320
89	0.57926267	7.58463810	4.39349772		89.00000000	0.38584270	2.92647722	1.923800
90	0.58937049	7.12873600	4.20146663		90.00000000	0.38155556	2.72000882	1.945190
91	0.59918809	6.52452850	3.90941977		91.00000000	0.37736264	2.46211328	1.966540
92	0.60931152	5.74689770	3.50165097		92.00000000	0.37326087	2.14509203	1.988020
93	0.61909783	4.80978820	2.97772944		93.00000000	0.36924731	1.77600136	2.009525
94	0.62919748	3.62390950	2.28015473		94.00000000	0.36531915	1.32388353	2.030909
95	0.63934177	2.18250730	1.39536808		95.00000000	0.36147368	0.78891895	2.052253
96	0.64905137	0.55714697	0.36161700		96.00000000	0.35770833	0.19929611	2.073623
97	0.65914208	-1.40826920	-0.92824949		97.00000000	0.35402062	-0.49855633	2.095101
98	0.66892767	-3.57787440	-2.39333919		98.00000000	0.35040816	-1.25371640	2.116529
99	0.67901909	-6.18831780	-4.20198592		99.00000000	0.34686869	-2.14653367	2.137892
100	0.68891633	-9.06927870	-6.24797420		100.00000000	0.34340000	-3.11439031	2.159269
101	0.69182485	-10.00032100	-6.91847058		101.00000000	0.34000000	-3.40010914	2.180753
21:02 02/04/2018
Test Lot:	JK-PERC
Recipe:	Recipe_YJX-LID
Cell Name:	1-5-6h
Test Order:	4
Test Condition:	Light
1	-0.29991275	8.84508130	-2.65275266		1.00000000	34.34000000	303.74009184	0.000000
2	-0.29005843	8.83721070	-2.56330746		2.00000000	17.17000000	151.73490772	0.061728
3	-0.27993989	8.84480090	-2.47601259		3.00000000	11.44666667	101.24348764	0.083223
4	-0.27011165	8.85200980	-2.39103097		4.00000000	8.58500000	75.99450413	0.104700
5	-0.25996631	8.83652780	-2.29719953		5.00000000	6.86800000	60.68927293	0.126065
6	-0.24981132	8.83689880	-2.20755735		6.00000000	5.72333333	50.57651747	0.147461
7	-0.23998754	8.84515950	-2.12272807		7.00000000	4.90571429	43.39182532	0.168947
8	-0.22983998	8.85014920	-2.03411812		8.00000000	4.29250000	37.98926544	0.190330
9	-0.22000875	8.83952900	-1.94477373		9.00000000	3.81555556	33.72771398	0.211691
10	-0.20983514	8.83904460	-1.85474216		10.00000000	3.43400000	30.35327916	0.233070
11	-0.20001359	8.84865570	-1.76985139		11.00000000	3.12181818	27.62389425	0.254541
12	-0.18987273	8.83319570	-1.67718298		12.00000000	2.86166667	25.27766169	0.275906
13	-0.18006159	8.85027790	-1.59359511		13.00000000	2.64153846	23.37834947	0.297256
14	-0.16993414	8.84049800	-1.50230242		14.00000000	2.45285714	21.68447867	0.318635
15	-0.16012003	8.84728720	-1.41662789		15.00000000	2.28933333	20.25438950	0.340112
16	-0.14997396	8.84676460	-1.32678432		16.00000000	2.14625000	18.98736852	0.361480
17	-0.13983682	8.84547620	-1.23692326		17.00000000	2.02000000	17.86786192	0.382831
18	-0.13000633	8.85052300	-1.15062401		18.00000000	1.90777778	16.88483110	0.404204
19	-0.11982677	8.84378430	-1.05972211		19.00000000	1.80736842	15.98397647	0.425681
20	-0.11001191	8.85090730	-0.97370522		20.00000000	1.71700000	15.19700783	0.447069
21	-0.09988446	8.83705230	-0.88268418		21.00000000	1.63523810	14.45068457	0.468421
22	-0.09007630	8.84519770	-0.79674266		22.00000000	1.56090909	13.80654950	0.489784
23	-0.07991311	8.84341240	-0.70670459		23.00000000	1.49304348	13.20359921	0.511269
24	-0.07009453	8.83272650	-0.61912584		24.00000000	1.43083333	12.63815950	0.532645
25	-0.05993209	8.84101390	-0.52986044		25.00000000	1.37360000	12.14401669	0.553998
26	-0.04981208	8.85434340	-0.44105322		26.00000000	1.32076923	11.69454432	0.575375
27	-0.03997935	8.83764930	-0.35332351		27.00000000	1.27185185	11.24018063	0.596854
28	-0.02985562	8.83727740	-0.26384236		28.00000000	1.22642857	10.83828950	0.618249
29	-0.02003406	8.84590340	-0.17721934		29.00000000	1.18413793	10.47476975	0.639641
30	-0.00990586	8.83702850	-0.08753832		30.00000000	1.14466667	10.11545196	0.661011
31	-0.00065442	8.83091550	-0.00577911		31.00000000	1.10774194	9.78237543	0.682602
32	0.00947507	8.85102180	0.08386401		32.00000000	1.07312500	9.49825277	0.703983
33	0.01929858	8.82265660	0.17026471		33.00000000	1.04060606	9.18090993	0.725366
34	0.02945031	8.85354230	0.26073954		34.00000000	1.01000000	8.94207772	0.746721
35	0.03927010	8.84311870	0.34727012		35.00000000	0.98114286	8.67636275	0.768197
36	0.04941811	8.83949180	0.43683095		36.00000000	0.95388889	8.43189301	0.789559
37	0.05922227	8.84397130	0.52376002		37.00000000	0.92810811	8.20816147	0.810945
38	0.06940600	8.83825870	0.61342814		38.00000000	0.90368421	7.98699484	0.832424
39	0.07950936	8.84410290	0.70318892		39.00000000	0.88051282	7.78734599	0.853858
40	0.08936115	8.84538650	0.79043387		40.00000000	0.85850000	7.59376431	0.875236
41	0.09947864	8.83196540	0.87859191		41.00000000	0.83756098	7.39730956	0.896606
42	0.10935052	8.84679130	0.96740123		42.00000000	0.81761905	7.23330508	0.917958
43	0.11950003	8.85246370	1.05786968		43.00000000	0.79860465	7.06961869	0.939455
44	0.12930493	8.83366300	1.14223618		44.00000000	0.78045455	6.89427244	0.960828
45	0.13946038	8.84500790	1.23352816		45.00000000	0.76311111	6.74972381	0.982238
46	0.14926305	8.84055330	1.31956795		46.00000000	0.74652174	6.59966522	1.003596
47	0.15943860	8.84142970	1.40966517		47.00000000	0.73063830	6.45988715	1.025070
48	0.16959554	8.82909300	1.49737480		48.00000000	0.71541667	6.31648028	1.046463
49	0.17938109	8.84546950	1.58670996		49.00000000	0.70081633	6.19904944	1.067846
50	0.18954621	8.84168150	1.67590722		50.00000000	0.68680000	6.07246685	1.089183
51	0.19934592	8.83912850	1.76204420		51.00000000	0.67333333	5.95167986	1.110658
52	0.20948350	8.83825020	1.85146759		52.00000000	0.66038462	5.83664446	1.132034
53	0.21926236	8.83916660	1.93809653		53.00000000	0.64792453	5.72711285	1.153468
54	0.22943047	8.84084700	2.02835968		54.00000000	0.63592593	5.62212381	1.174959
55	0.23926885	8.84528640	2.11640150		55.00000000	0.62436364	5.52267518	1.196343
56	0.24939826	8.84222030	2.20523436		56.00000000	0.61321429	5.42217581	1.217710
57	0.25955966	8.82970430	2.29183505		57.00000000	0.60245614	5.31950957	1.239094
58	0.26938021	8.85704140	2.38591167		58.00000000	0.59206897	5.24397934	1.260568
59	0.27950439	8.83537010	2.46952473		59.00000000	0.58203390	5.14248490	1.281941
60	0.28931972	8.84089570	2.55784547		60.00000000	0.57233333	5.05993931	1.303299
61	0.29948410	8.83464530	2.64583580		61.00000000	0.56295082	4.97347081	1.324669
62	0.30928975	8.83855920	2.73367577		62.00000000	0.55387097	4.89542134	1.346159
63	0.31943774	8.84058190	2.82401550		63.00000000	0.54507937	4.81881877	1.367530
64	0.32926798	8.83838560	2.91019737		64.00000000	0.53656250	4.74234627	1.388865
65	0.33938769	8.83600430	2.99883109		65.00000000	0.52830769	4.66812904	1.410243
66	0.34922162	8.82690910	3.08254750		66.00000000	0.52030303	4.59266755	1.431725
67	0.35937634	8.84653950	3.17923699		67.00000000	0.51253731	4.53418159	1.453103
68	0.36954814	8.83083530	3.26341876		68.00000000	0.50500000	4.45957183	1.474458
69	0.37935010	8.82771490	3.34879453		69.00000000	0.49768116	4.39338739	1.495830
70	0.38950107	8.83527280	3.44134821		70.00000000	0.49057143	4.33433240	1.517300
71	0.39932904	8.83612730	3.52852223		71.00000000	0.48366197	4.27369875	1.538665
72	0.40945473	8.82884310	3.61501157		72.00000000	0.47694444	4.21086767	1.560011
73	0.41930875	8.83153150	3.70313843		73.00000000	0.47041096	4.15444920	1.581388
74	0.42945677	8.81958390	3.78763001		74.00000000	0.46405405	4.09276366	1.602873
75	0.43927133	8.83033660	3.87891370		75.00000000	0.45786667	4.04311678	1.624240
76	0.44942978	8.81034370	3.95963083		76.00000000	0.45184211	3.98088425	1.645605
77	0.45954725	8.81389810	4.05040263		77.00000000	0.44597403	3.93076962	1.666970
78	0.46945637	8.80543040	4.13376539		78.00000000	0.44025641	3.87664718	1.688441
79	0.47957906	8.77697850	4.20925510		79.00000000	0.43468354	3.81520812	1.709829
80	0.48939142	8.77911280	4.29642248		80.00000000	0.42925000	3.76843417	1.731221
81	0.49952453	8.73203950	4.36186793		81.00000000	0.42395062	3.70195354	1.752571
82	0.50936145	8.72113510	4.44221002		82.00000000	0.41878049	3.65224121	1.774045
83	0.51949161	8.67158600	4.50481617		83.00000000	0.41373494	3.58773811	1.795430
84	0.52928460	8.59339710	4.54835275		84.00000000	0.40880952	3.51306258	1.816811
85	0.53939760	8.51792430	4.59454792		85.00000000	0.40400000	3.44124142	1.838308
86	0.54954863	8.38920880	4.61027820		86.00000000	0.39930233	3.34983058	1.859690
87	0.55935204	8.19858650	4.58589608		87.00000000	0.39471264	3.23608575	1.881051
88	0.56948292	7.95190670	4.52847505		88.00000000	0.39022727	3.10305086	1.902426
89	0.57928485	7.60600710	4.40604468		89.00000000	0.38584270	2.93472229	1.923900
90	0.58937407	7.14911940	4.21350560		90.00000000	0.38155556	2.72778622	1.945295
91	0.59916925	6.56465200	3.93333762		91.00000000	0.37736264	2.47725439	1.966640
92	0.60929644	5.78370430	3.52399044		92.00000000	0.37326087	2.15883050	1.988114
93	0.61907083	4.83256530	2.99170021		93.00000000	0.36924731	1.78441175	2.009640
94	0.62920845	3.63694310	2.28839533		94.00000000	0.36531915	1.32864496	2.031022
95	0.63932967	2.19688890	1.40453626		95.00000000	0.36147368	0.79411752	2.052377
96	0.64905268	0.54547417	0.35404147		96.00000000	0.35770833	0.19512066	2.073762
97	0.65917313	-1.43607900	-0.94662469		97.00000000	0.35402062	-0.50840158	2.095282
98	0.66893339	-3.65808030	-2.44701206		98.00000000	0.35040816	-1.28182120	2.116684
99	0.67903751	-6.32741930	-4.29655505		99.00000000	0.34686869	-2.19478362	2.138036
100	0.68896967	-9.29270170	-6.40238962		100.00000000	0.34340000	-3.19111376	2.159410
101	0.69110125	-10.00020100	-6.91115141		101.00000000	0.34000000	-3.40006834	2.180893
21:04 02/04/2018
Test Lot:	JK-PERC
Recipe:	Recipe_YJX-LID
Cell Name:	1-5-6h
Test Order:	5
Test Condition:	Light
1	-0.29988223	8.63298030	-2.58887738		1.00000000	34.34000000	296.45654350	0.000000
2	-0.29008529	8.64045050	-2.50646759		2.00000000	17.17000000	148.35653509	0.061715
3	-0.27995342	8.64833740	-2.42113163		3.00000000	11.44666667	98.99463544	0.083229
4	-0.27014157	8.63913540	-2.33378960		4.00000000	8.58500000	74.16697741	0.104618
5	-0.26000226	8.64687350	-2.24820665		5.00000000	6.86800000	59.38672720	0.125984
6	-0.24982648	8.65052030	-2.16112904		6.00000000	5.72333333	49.50981118	0.147357
7	-0.23999082	8.63380150	-2.07203310		7.00000000	4.90571429	42.35496336	0.168872
8	-0.22986266	8.64339260	-1.98679321		8.00000000	4.29250000	37.10176274	0.190255
9	-0.22003818	8.64457890	-1.90213741		9.00000000	3.81555556	32.98387105	0.211611
10	-0.20988919	8.63819890	-1.81306457		10.00000000	3.43400000	29.66357502	0.232991
11	-0.20004907	8.64344410	-1.72911295		11.00000000	3.12181818	26.98326094	0.254503
12	-0.18988891	8.64197730	-1.64101565		12.00000000	2.86166667	24.73045837	0.275899
13	-0.18013215	8.63318060	-1.55511338		13.00000000	2.64153846	22.80487860	0.297247
14	-0.16996604	8.65114400	-1.47040069		14.00000000	2.45285714	21.22002035	0.318622
15	-0.16015942	8.62866120	-1.38196137		15.00000000	2.28933333	19.75388171	0.340105
16	-0.14998139	8.64362430	-1.29638279		16.00000000	2.14625000	18.55137865	0.361486
17	-0.13984357	8.65194890	-1.20991942		17.00000000	2.02000000	17.47693678	0.382890
18	-0.13000718	8.63930030	-1.12317107		18.00000000	1.90777778	16.48186513	0.404258
19	-0.11987977	8.63469790	-1.03512560		19.00000000	1.80736842	15.60608031	0.425735
20	-0.11006272	8.65254780	-0.95232295		20.00000000	1.71700000	14.85642457	0.447119
21	-0.09991373	8.64369300	-0.86362362		21.00000000	1.63523810	14.13449608	0.468504
22	-0.09008849	8.63566590	-0.77797414		22.00000000	1.56090909	13.47948941	0.489840
23	-0.07994769	8.65209870	-0.69171529		23.00000000	1.49304348	12.91795954	0.511305
24	-0.07013288	8.64899160	-0.60657870		24.00000000	1.43083333	12.37526548	0.532677
25	-0.05997570	8.63336280	-0.51779197		25.00000000	1.37360000	11.85878714	0.554055
26	-0.04981777	8.65787790	-0.43131620		26.00000000	1.32076923	11.43505873	0.575533
27	-0.03999552	8.64152810	-0.34562242		27.00000000	1.27185185	10.99074352	0.596984
28	-0.02985918	8.64232440	-0.25805273		28.00000000	1.22642857	10.59919357	0.618366
29	-0.02002055	8.64375970	-0.17305284		29.00000000	1.18413793	10.23540373	0.639751
30	-0.00992961	8.64281850	-0.08581984		30.00000000	1.14466667	9.89314624	0.661101
31	-0.00069832	8.64245610	-0.00603517		31.00000000	1.10774194	9.57361105	0.682705
32	0.00945940	8.63943200	0.08172385		32.00000000	1.07312500	9.27119047	0.704084
33	0.01927393	8.63893130	0.16650618		33.00000000	1.04060606	8.98972427	0.725482
34	0.02944050	8.63926510	0.25434427		34.00000000	1.01000000	8.72565775	0.746843
35	0.03923270	8.63684370	0.33884671		35.00000000	0.98114286	8.47397750	0.768316
36	0.04938066	8.64504620	0.42689809		36.00000000	0.95388889	8.24641351	0.789701
37	0.05920561	8.64414690	0.51178202		37.00000000	0.92810811	8.02270283	0.811088
38	0.06935581	8.63436890	0.59884363		38.00000000	0.90368421	7.80274284	0.832428
39	0.07950302	8.63204770	0.68627388		39.00000000	0.88051282	7.60062867	0.853909
40	0.08934137	8.65810200	0.77352665		40.00000000	0.85850000	7.43298057	0.875305
41	0.09945956	8.63816360	0.85914794		41.00000000	0.83756098	7.23498873	0.896689
42	0.10928898	8.64090440	0.94435563		42.00000000	0.81761905	7.06496803	0.918184
43	0.11945777	8.65344050	1.03372070		43.00000000	0.79860465	6.91067783	0.939561
44	0.12925147	8.63668540	1.11630428		44.00000000	0.78045455	6.74054038	0.960915
45	0.13944185	8.65022660	1.20620360		45.00000000	0.76311111	6.60108403	0.982296
46	0.14925340	8.63721940	1.28913436		46.00000000	0.74652174	6.44787205	1.003803
47	0.15938722	8.63959410	1.37704089		47.00000000	0.73063830	6.31241833	1.025176
48	0.16957834	8.64562510	1.46611075		48.00000000	0.71541667	6.18522429	1.046535
49	0.17938618	8.63212590	1.54848409		49.00000000	0.70081633	6.04953476	1.067912
50	0.18949321	8.63778020	1.63680070		50.00000000	0.68680000	5.93242744	1.089397
51	0.19928244	8.64567180	1.72293057		51.00000000	0.67333333	5.82141901	1.110776
52	0.20943709	8.64287660	1.81013892		52.00000000	0.66038462	5.70762274	1.132125
53	0.21925683	8.63972090	1.89431782		53.00000000	0.64792453	5.59788709	1.153498
54	0.22941744	8.63436890	1.98087481		54.00000000	0.63592593	5.49081904	1.174978
55	0.23923048	8.65007970	2.06936272		55.00000000	0.62436364	5.40079522	1.196357
56	0.24937695	8.63144490	2.15248340		56.00000000	0.61321429	5.29292532	1.217712
57	0.25951672	8.64658830	2.24393423		57.00000000	0.60245614	5.20919021	1.239083
58	0.26932904	8.63372140	2.32531190		58.00000000	0.59206897	5.11175850	1.260559
59	0.27949187	8.63902850	2.41453823		59.00000000	0.58203390	5.02820744	1.281950
60	0.28930342	8.64272690	2.50037045		60.00000000	0.57233333	4.94652070	1.303303
61	0.29944244	8.63263510	2.58497732		61.00000000	0.56295082	4.85974901	1.324686
62	0.30926964	8.62786670	2.66833723		62.00000000	0.55387097	4.77872488	1.346143
63	0.31944066	8.65683170	2.76534403		63.00000000	0.54507937	4.71866033	1.367516
64	0.32925668	8.63750650	2.84395671		64.00000000	0.53656250	4.63456208	1.388884
65	0.33938903	8.63007350	2.92895227		65.00000000	0.52830769	4.55933422	1.410265
66	0.34922513	8.65163140	3.02136710		66.00000000	0.52030303	4.50147003	1.431745
67	0.35937160	8.63141820	3.10188657		67.00000000	0.51253731	4.42392390	1.453130
68	0.36950022	8.63153840	3.18935534		68.00000000	0.50500000	4.35892689	1.474523
69	0.37931401	8.63994600	3.27725256		69.00000000	0.49768116	4.29993834	1.495860
70	0.38947016	8.64463420	3.36682707		70.00000000	0.49057143	4.24081055	1.517354
71	0.39930254	8.60993000	3.43796692		71.00000000	0.48366197	4.16429572	1.538726
72	0.40946612	8.63498970	3.53573573		72.00000000	0.47694444	4.11841037	1.560109
73	0.41928214	8.63732150	3.62147464		73.00000000	0.47041096	4.06309069	1.581604
74	0.42945912	8.62031360	3.70207229		74.00000000	0.46405405	4.00029147	1.602978
75	0.43925804	8.61849780	3.78574445		75.00000000	0.45786667	3.94612286	1.624319
76	0.44941866	8.61773400	3.87297047		76.00000000	0.45184211	3.89385507	1.645704
77	0.45953238	8.59346490	3.94897538		77.00000000	0.44597403	3.83246214	1.667189
78	0.46938115	8.60745050	4.04017501		78.00000000	0.44025641	3.78948526	1.688571
79	0.47953802	8.56772330	4.10854907		79.00000000	0.43468354	3.72424833	1.709934
80	0.48933098	8.56238750	4.18984147		80.00000000	0.42925000	3.67540483	1.731312
81	0.49948788	8.52303220	4.25715128		81.00000000	0.42395062	3.61334476	1.752855
82	0.50929940	8.46231750	4.30985323		82.00000000	0.41878049	3.54385345	1.774250
83	0.51945406	8.41285230	4.37009028		83.00000000	0.41373494	3.48069094	1.795591
84	0.52922994	8.29599190	4.39048730		84.00000000	0.40880952	3.39148050	1.816961
85	0.53937638	8.16948600	4.40642779		85.00000000	0.40400000	3.30047234	1.838451
86	0.54947448	7.96514270	4.37664264		86.00000000	0.39930233	3.18050000	1.859834
87	0.55930239	7.69585610	4.30431071		87.00000000	0.39471264	3.03765171	1.881195
88	0.56943548	7.31613830	4.16606872		88.00000000	0.39022727	2.85495670	1.902570
89	0.57923883	6.81721930	3.94879813		89.00000000	0.38584270	2.63037428	1.924052
90	0.58932352	6.10416030	3.59732523		90.00000000	0.38155556	2.32907627	1.945437
91	0.59915221	5.24458790	3.14230643		91.00000000	0.37736264	1.97911152	1.966787
92	0.60927188	4.09526010	2.49512682		92.00000000	0.37326087	1.52860035	1.988259
93	0.61904031	2.71502640	1.68071078		93.00000000	0.36924731	1.00251620	2.009762
94	0.62909669	1.01598790	0.63915462		94.00000000	0.36531915	0.37115983	2.031129
95	0.63920075	-1.00021080	-0.63933549		95.00000000	0.36147368	-0.36154988	2.052481
96	0.64894682	-3.25923180	-2.11506811		96.00000000	0.35770833	-1.16585438	2.073855
97	0.65904343	-5.92501590	-3.90484280		97.00000000	0.35402062	-2.09757779	2.095334
98	0.66898519	-8.84216020	-5.91527422		98.00000000	0.35040816	-3.09836511	2.116716
99	0.67262167	-10.00022500	-6.72636804		99.00000000	0.34686869	-3.46876491	2.138101
100	0.67261052	-10.00007000	-6.72615228		100.00000000	0.34340000	-3.43402404	2.159576
101	0.67259932	-10.00006800	-6.72603894		101.00000000	0.34000000	-3.40002312	2.181079
21:04 02/04/2018
Test Lot:	JK-PERC
Recipe:	Recipe_YJX-LID
Cell Name:	1-5-6h
Test Order:	6
Test Condition:	Light
1	-0.29993582	8.64323710	-2.59241641		1.00000000	34.34000000	296.80876201	0.000000
2	-0.29010388	8.64355280	-2.50752820		2.00000000	17.17000000	148.40980158	0.021611
3	-0.27995637	8.63948540	-2.41867897		3.00000000	11.44666667	98.89330955	0.043010
4	-0.27014306	8.64439200	-2.33522251		4.00000000	8.58500000	74.21210532	0.064417
5	-0.25999853	8.64391610	-2.24740548		5.00000000	6.86800000	59.36641577	0.085814
6	-0.24983540	8.63382630	-2.15703545		6.00000000	5.72333333	49.41426586	0.107327
7	-0.24003324	8.63327220	-2.07227230		7.00000000	4.90571429	42.35236676	0.128704
8	-0.22987755	8.64556030	-1.98742022		8.00000000	4.29250000	37.11106759	0.150080
9	-0.22002254	8.65036680	-1.90327568		9.00000000	3.81555556	33.00595510	0.171448
10	-0.20989068	8.62842940	-1.81102691		10.00000000	3.43400000	29.63002656	0.192921
11	-0.20004088	8.64677330	-1.72970814		11.00000000	3.12181818	26.99365410	0.214313
12	-0.18992984	8.63351630	-1.63976237		12.00000000	2.86166667	24.70624581	0.235687
13	-0.18011577	8.64023490	-1.55624256		13.00000000	2.64153846	22.82351281	0.257038
14	-0.16995786	8.63827900	-1.46814341		14.00000000	2.45285714	21.18846435	0.278511
15	-0.16018100	8.63954070	-1.38389027		15.00000000	2.28933333	19.77878851	0.299876
16	-0.15003721	8.62704940	-1.29437842		16.00000000	2.14625000	18.51580477	0.321263
17	-0.13987632	8.64613250	-1.20938920		17.00000000	2.02000000	17.46518765	0.342745
18	-0.13004141	8.62955570	-1.12219959		18.00000000	1.90777778	16.46327460	0.364109
19	-0.11989986	8.63480950	-1.03531245		19.00000000	1.80736842	15.60628201	0.385503
20	-0.11005156	8.63912010	-0.95074864		20.00000000	1.71700000	14.83336921	0.406886
21	-0.09992340	8.64514830	-0.86385263		21.00000000	1.63523810	14.13687584	0.428372
22	-0.09008627	8.63748840	-0.77811908		22.00000000	1.56090909	13.48233417	0.449765
23	-0.07994694	8.63680740	-0.69048635		23.00000000	1.49304348	12.89512896	0.471115
24	-0.07013363	8.63263990	-0.60543834		24.00000000	1.43083333	12.35186892	0.492484
25	-0.05998612	8.65222930	-0.51901365		25.00000000	1.37360000	11.88470217	0.513967
26	-0.04983415	8.64061070	-0.43059750		26.00000000	1.32076923	11.41225275	0.535346
27	-0.04004167	8.63355450	-0.34570191		27.00000000	1.27185185	10.98060228	0.556705
28	-0.02991054	8.64444540	-0.25856000		28.00000000	1.22642857	10.60179482	0.578092
29	-0.02006744	8.63841720	-0.17335094		29.00000000	1.18413793	10.22907747	0.599563
30	-0.00992366	8.65107250	-0.08585030		30.00000000	1.14466667	9.90259432	0.620931
31	-0.00069906	8.63285350	-0.00603489		31.00000000	1.10774194	9.56297384	0.642404
32	0.00944675	8.64877130	0.08170277		32.00000000	1.07312500	9.28121270	0.663784
33	0.01926723	8.64798550	0.16662275		33.00000000	1.04060606	8.99914612	0.685261
34	0.02940031	8.63380340	0.25383648		34.00000000	1.01000000	8.72014143	0.706632
35	0.03924238	8.62704280	0.33854566		35.00000000	0.98114286	8.46436142	0.727967
36	0.04936950	8.64505480	0.42680202		36.00000000	0.95388889	8.24642172	0.749337
37	0.05921231	8.63999650	0.51159417		37.00000000	0.92810811	8.01885081	0.770810
38	0.06935953	8.64244650	0.59943599		38.00000000	0.90368421	7.81004244	0.792193
39	0.07949558	8.62667850	0.68578280		39.00000000	0.88051282	7.59590102	0.813571
40	0.08932797	8.64282510	0.77204601		40.00000000	0.85850000	7.41986535	0.834924
41	0.09946477	8.63737300	0.85911429		41.00000000	0.83756098	7.23432656	0.856404
42	0.10933661	8.63623330	0.94425647		42.00000000	0.81761905	7.06114885	0.877795
43	0.11944065	8.62755680	1.03048099		43.00000000	0.79860465	6.89000699	0.899180
44	0.12927602	8.64589880	1.11770739		44.00000000	0.78045455	6.74773102	0.920544
45	0.13942249	8.63278010	1.20360370		45.00000000	0.76311111	6.58777041	0.942021
46	0.14926293	8.63793560	1.28932358		46.00000000	0.74652174	6.44840671	0.963399
47	0.15944463	8.63531880	1.37685521		47.00000000	0.73063830	6.30929463	1.025097
48	0.16957125	8.63949390	1.46500978		48.00000000	0.71541667	6.18083793	1.046498
49	0.17937188	8.63368990	1.54864119		49.00000000	0.70081633	6.05063084	1.067884
50	0.18951562	8.62860010	1.63525450		50.00000000	0.68680000	5.92612255	1.089369
51	0.19932742	8.63229470	1.72065303		51.00000000	0.67333333	5.81241176	1.110754
52	0.20948382	8.62953760	1.80774850		52.00000000	0.66038462	5.69881387	1.132097
53	0.21928370	8.64486410	1.89567779		53.00000000	0.64792453	5.60121949	1.153502
54	0.22943637	8.63876820	1.98204762		54.00000000	0.63592593	5.49361667	1.174991
55	0.23924147	8.64418510	2.06804755		55.00000000	0.62436364	5.39711484	1.196359
56	0.24938892	8.63947390	2.15458907		56.00000000	0.61321429	5.29784882	1.217695
57	0.25954980	8.62917710	2.23970119		57.00000000	0.60245614	5.19870073	1.239075
58	0.26935488	8.63788030	2.32665521		58.00000000	0.59206897	5.11422085	1.260548
59	0.27951500	8.62996010	2.41220330		59.00000000	0.58203390	5.02292932	1.281921
60	0.28932381	8.64237980	2.50044625		60.00000000	0.57233333	4.94632204	1.303278
61	0.29948840	8.62249370	2.58233684		61.00000000	0.56295082	4.85403990	1.324659
62	0.30927488	8.63737770	2.67132395		62.00000000	0.55387097	4.78399275	1.346133
63	0.31943649	8.62702660	2.75578710		63.00000000	0.54507937	4.70241418	1.367515
64	0.32928327	8.63395880	2.84301819		64.00000000	0.53656250	4.63265852	1.388858
65	0.33941880	8.62695980	2.92815234		65.00000000	0.52830769	4.55768922	1.410243
66	0.34921497	8.63741970	3.01631626		66.00000000	0.52030303	4.49407564	1.431712
67	0.35937881	8.63372140	3.10277652		67.00000000	0.51253731	4.42510437	1.453094
68	0.36952031	8.62252040	3.18619641		68.00000000	0.50500000	4.35437280	1.474459
69	0.37934923	8.64748950	3.28041848		69.00000000	0.49768116	4.30369260	1.495835
70	0.38951233	8.62291620	3.35873218		70.00000000	0.49057143	4.23015632	1.517311
71	0.39933601	8.62611010	3.44471639		71.00000000	0.48366197	4.17212142	1.538705
72	0.40950358	8.61981870	3.52984662		72.00000000	0.47694444	4.11117464	1.560073
73	0.41929305	8.62785910	3.61760136		73.00000000	0.47041096	4.05863947	1.581436
74	0.42946878	8.62906550	3.70591423		74.00000000	0.46405405	4.00435283	1.602917
75	0.43926421	8.61476710	3.78415886		75.00000000	0.45786667	3.94441470	1.624294
76	0.44942880	8.59999470	3.86508530		76.00000000	0.45184211	3.88583971	1.645717
77	0.45955989	8.59917160	3.95183435		77.00000000	0.44597403	3.83500718	1.667076
78	0.46944386	8.58613110	4.03070653		78.00000000	0.44025641	3.78009926	1.688553
79	0.47957122	8.57668110	4.11312942		79.00000000	0.43468354	3.72814214	1.709935
80	0.48936218	8.55914500	4.18852186		80.00000000	0.42925000	3.67401299	1.731321
81	0.49950966	8.52113530	4.25638940		81.00000000	0.42395062	3.61254057	1.752801
82	0.50934899	8.47864820	4.31859090		82.00000000	0.41878049	3.55069243	1.774195
83	0.51945698	8.39849280	4.36265571		83.00000000	0.41373494	3.47474991	1.795547
84	0.52926135	8.31106570	4.39872585		84.00000000	0.40880952	3.39764281	1.816927
85	0.53939170	8.17749400	4.41087239		85.00000000	0.40400000	3.30370758	1.838420
86	0.54952127	7.97611000	4.38304210		86.00000000	0.39930233	3.18487927	1.859798
87	0.55934501	7.70903870	4.31201233		87.00000000	0.39471264	3.04285505	1.881140
88	0.56943291	7.32600120	4.17166618		88.00000000	0.39022727	2.85880547	1.902549
89	0.57925361	6.81067900	3.94511040		89.00000000	0.38584270	2.62785075	1.924035
90	0.58931923	6.13763480	3.61702621		90.00000000	0.38155556	2.34184866	1.945416
91	0.59914440	5.26178930	3.15257159		91.00000000	0.37736264	1.98560269	1.966769
92	0.60927850	4.12232590	2.51164454		92.00000000	0.37326087	1.53870295	1.988250
93	0.61904263	2.72894790	1.68933509		93.00000000	0.36924731	1.00765668	2.009756
94	0.62914097	1.01543140	0.63884950		94.00000000	0.36531915	0.37095653	2.031145
95	0.63919097	-1.03046170	-0.65866181		95.00000000	0.36147368	-0.37248479	2.052491
96	0.64897448	-3.30289530	-2.14349476		96.00000000	0.35770833	-1.18147317	2.073917
97	0.65904897	-6.01284840	-3.96276154		97.00000000	0.35402062	-2.12867231	2.095415
98	0.66900516	-8.98252490	-6.00935551		98.00000000	0.35040816	-3.14755005	2.116800
99	0.67214078	-10.00034100	-6.72163700		99.00000000	0.34686869	-3.46880515	2.138160
100	0.67211622	-10.00033100	-6.72138467		100.00000000	0.34340000	-3.43411367	2.159531
101	0.67210954	-10.00034100	-6.72132459		101.00000000	0.34000000	-3.40011594	2.181012
21:04 02/04/2018
Test Lot:	JK-PERC
Recipe:	Recipe_YJX-LID
Cell Name:	1-5-6h
Test Order:	7
Test Condition:	Light
1	-0.29988587	8.64096070	-2.59130202		1.00000000	34.34000000	296.73059044	0.000000
2	-0.29003286	8.64075760	-2.50610364		2.00000000	17.17000000	148.36180799	0.021519
3	-0.27988511	8.63901710	-2.41793225		3.00000000	11.44666667	98.88794907	0.042941
4	-0.27010652	8.62932780	-2.33083770		4.00000000	8.58500000	74.08277916	0.064347
5	-0.25993049	8.65067390	-2.24857391		5.00000000	6.86800000	59.41282835	0.085704
6	-0.24980059	8.63541890	-2.15713274		6.00000000	5.72333333	49.42338084	0.107208
7	-0.23996173	8.63998990	-2.07326692		7.00000000	4.90571429	42.38532188	0.128596
8	-0.22982439	8.63983820	-1.98564554		8.00000000	4.29250000	37.08650547	0.149992
9	-0.21999373	8.64297010	-1.90139923		9.00000000	3.81555556	32.97773258	0.171337
10	-0.20983778	8.63749980	-1.81247378		10.00000000	3.43400000	29.66117431	0.192824
11	-0.20002124	8.63655190	-1.72749382		11.00000000	3.12181818	26.96174475	0.214193
12	-0.18987274	8.64166160	-1.64081597		12.00000000	2.86166667	24.72955495	0.235578
13	-0.18009119	8.64079090	-1.55613032		13.00000000	2.64153846	22.82498150	0.257080
14	-0.16995683	8.63863660	-1.46819529		14.00000000	2.45285714	21.18934149	0.278469
15	-0.16010903	8.64545820	-1.38421593		15.00000000	2.28933333	19.79233564	0.299833
16	-0.14996798	8.63273530	-1.29463387		16.00000000	2.14625000	18.52800814	0.321213
17	-0.13982321	8.64195540	-1.20834594		17.00000000	2.02000000	17.45674991	0.342699
18	-0.13000593	8.63292030	-1.12233083		18.00000000	1.90777778	16.46969351	0.364082
19	-0.11987752	8.64947510	-1.03687762		19.00000000	1.80736842	15.63278815	0.385439
20	-0.11005503	8.63454910	-0.95027556		20.00000000	1.71700000	14.82552080	0.406807
21	-0.09990431	8.64067080	-0.86324022		21.00000000	1.63523810	14.12955406	0.428294
22	-0.09007065	8.64407160	-0.77857715		22.00000000	1.56090909	13.49260994	0.449667
23	-0.07993927	8.65355590	-0.69175893		23.00000000	1.49304348	12.92013520	0.471007
24	-0.07010412	8.63133340	-0.60509205		24.00000000	1.43083333	12.34999954	0.492392
25	-0.05994627	8.64393520	-0.51817170		25.00000000	1.37360000	11.87330939	0.513855
26	-0.04980169	8.65114310	-0.43084154		26.00000000	1.32076923	11.42616362	0.575485
27	-0.03996524	8.62708190	-0.34478338		27.00000000	1.27185185	10.97237009	0.596958
28	-0.02982215	8.63673780	-0.25756605		28.00000000	1.22642857	10.59234200	0.618361
29	-0.02000877	8.64366150	-0.17294901		29.00000000	1.18413793	10.23528745	0.639726
30	-0.00989098	8.62927820	-0.08535200		30.00000000	1.14466667	9.87764711	0.661106
31	-0.00064028	8.65009690	-0.00553847		31.00000000	1.10774194	9.58207508	0.682715
32	0.00951154	8.63027760	0.08208722		32.00000000	1.07312500	9.26136665	0.704085
33	0.01932389	8.63501360	0.16686208		33.00000000	1.04060606	8.98564749	0.725438
34	0.02947712	8.63754370	0.25460989		34.00000000	1.01000000	8.72391914	0.746814
35	0.03930436	8.62746910	0.33909713		35.00000000	0.98114286	8.46477968	0.768288
36	0.04943749	8.64327140	0.42730161		36.00000000	0.95388889	8.24472055	0.789676
37	0.05925579	8.63383580	0.51160480		37.00000000	0.92810811	8.01313301	0.811040
38	0.06940307	8.64414600	0.59993024		38.00000000	0.90368421	7.81157825	0.832459
39	0.07958680	8.63547610	0.68726994		39.00000000	0.88051282	7.60364742	0.853943
40	0.08938278	8.64192100	0.77243895		40.00000000	0.85850000	7.41908918	0.875328
41	0.09952112	8.63386060	0.85925150		41.00000000	0.83756098	7.23138471	0.896718
42	0.10933497	8.63971810	0.94462332		42.00000000	0.81761905	7.06399808	0.918062
43	0.11949117	8.64376830	1.03285399		43.00000000	0.79860465	6.90295357	0.939537
44	0.12930129	8.63316630	1.11627954		44.00000000	0.78045455	6.73779388	0.960916
45	0.13948131	8.65209290	1.20680525		45.00000000	0.76311111	6.60250823	0.982296
46	0.14928772	8.63107870	1.28851406		46.00000000	0.74652174	6.44328788	1.003764
47	0.15945061	8.63128380	1.37626347		47.00000000	0.73063830	6.30634650	1.025157
48	0.16960384	8.64189430	1.46569846		48.00000000	0.71541667	6.18255521	1.046524
49	0.17938717	8.63703630	1.54937350		49.00000000	0.70081633	6.05297605	1.067890
50	0.18953815	8.64644050	1.63883034		50.00000000	0.68680000	5.93837534	1.089379
51	0.19931553	8.63266750	1.72062470		51.00000000	0.67333333	5.81266278	1.110769
52	0.20945536	8.62981700	1.80756143		52.00000000	0.66038462	5.69899838	1.132108
53	0.21926846	8.64786530	1.89620411		53.00000000	0.64792453	5.60316405	1.153494
54	0.22945368	8.63025570	1.98024393		54.00000000	0.63592593	5.48820335	1.174976
55	0.23926008	8.64144710	2.06755332		55.00000000	0.62436364	5.39540533	1.196364
56	0.24939246	8.63419630	2.15330346		56.00000000	0.61321429	5.29461252	1.217712
57	0.25953752	8.63670730	2.24154959		57.00000000	0.60245614	5.20323735	1.239088
58	0.26937145	8.64930920	2.32987696		58.00000000	0.59206897	5.12098755	1.260561
59	0.27952468	8.62405590	2.41063647		59.00000000	0.58203390	5.01949287	1.281944
60	0.28934595	8.65115170	2.50317571		60.00000000	0.57233333	4.95134249	1.303294
61	0.29951406	8.63475990	2.58623199		61.00000000	0.56295082	4.86094516	1.324669
62	0.30932790	8.62894060	2.66917208		62.00000000	0.55387097	4.77931968	1.346152
63	0.31945509	8.63764860	2.75934081		63.00000000	0.54507937	4.70820401	1.367568
64	0.32926223	8.62701130	2.84054898		64.00000000	0.53656250	4.62893075	1.388940
65	0.33942363	8.63693810	2.93158088		65.00000000	0.52830769	4.56296084	1.410314
66	0.34927991	8.62909410	3.01396921		66.00000000	0.52030303	4.48974381	1.431785
67	0.35944802	8.64564610	3.10766037		67.00000000	0.51253731	4.43121622	1.453179
68	0.36955062	8.62193010	3.18623961		68.00000000	0.50500000	4.35407470	1.474543
69	0.37940317	8.63384530	3.27570828		69.00000000	0.49768116	4.29690214	1.495914
70	0.38952962	8.63283440	3.36274470		70.00000000	0.49057143	4.23502190	1.517388
71	0.39936876	8.61949630	3.44235755		71.00000000	0.48366197	4.16892258	1.538753
72	0.40951604	8.62624550	3.53258590		72.00000000	0.47694444	4.11423987	1.560145
73	0.41930902	8.62599850	3.61695898		73.00000000	0.47041096	4.05776423	1.581499
74	0.42948756	8.62349220	3.70368262		74.00000000	0.46405405	4.00176652	1.602963
75	0.43929544	8.61503600	3.78454603		75.00000000	0.45786667	3.94453782	1.624346
76	0.44946206	8.59859750	3.86474335		76.00000000	0.45184211	3.88520840	1.645719
77	0.45960116	8.60117440	3.95310973		77.00000000	0.44597403	3.83590038	1.667195
78	0.46948794	8.59246440	4.03405841		78.00000000	0.44025641	3.78288753	1.688577
79	0.47956598	8.56496330	4.10746502		79.00000000	0.43468354	3.72304860	1.709921
80	0.48943862	8.56029220	4.18973760		80.00000000	0.42925000	3.67450543	1.731290
81	0.49952859	8.51309870	4.25253619		81.00000000	0.42395062	3.60913345	1.752768
82	0.50938112	8.46080680	4.30977524		82.00000000	0.41878049	3.54322080	1.774148
83	0.51948375	8.40861130	4.36813693		83.00000000	0.41373494	3.47893629	1.795516
84	0.52926856	8.31705280	4.40195456		84.00000000	0.40880952	3.40009039	1.816889
85	0.53939873	8.16580100	4.40462269		85.00000000	0.40400000	3.29898360	1.838362
86	0.54951620	7.97607280	4.38298122		86.00000000	0.39930233	3.18486442	1.859741
87	0.55930775	7.70537660	4.30967685		87.00000000	0.39471264	3.04140957	1.881097
88	0.56946391	7.33144810	4.17499510		88.00000000	0.39022727	2.86093100	1.902476
89	0.57925916	6.82696820	3.95458386		89.00000000	0.38584270	2.63413582	1.923956
90	0.58936477	6.14031700	3.61888652		90.00000000	0.38155556	2.34287206	1.945343
91	0.59917635	5.26287840	3.15339227		91.00000000	0.37736264	1.98601367	1.966678
92	0.60926408	4.12074140	2.51061972		92.00000000	0.37326087	1.53811152	1.988146
93	0.61901248	2.73941950	1.69573486		93.00000000	0.36924731	1.01152329	2.009638
94	0.62913364	1.01036790	0.63565643		94.00000000	0.36531915	0.36910674	2.031001
95	0.63924301	-1.03495120	-0.66158532		95.00000000	0.36147368	-0.37410762	2.052420
96	0.64899284	-3.33029030	-2.16133456		96.00000000	0.35770833	-1.19127259	2.073823
97	0.65906495	-6.05361890	-3.98972804		97.00000000	0.35402062	-2.14310591	2.095303
98	0.66906112	-9.05361460	-6.05742152		98.00000000	0.35040816	-3.17246046	2.116708
99	0.67191756	-9.99995990	-6.71914866		99.00000000	0.34686869	-3.46867296	2.138087
100	0.67190421	-9.99985310	-6.71894340		100.00000000	0.34340000	-3.43394955	2.159464
101	0.67188263	-9.99984840	-6.71872444		101.00000000	0.34000000	-3.39994846	2.180957
