# Supplementary material for: Study on the Electrical Injection Regeneration of Industrialized B-Doped Czochralski Silicon PERC Solar Cells
Source: Hindawi journal article supplement (doi:10.1155/2019/5357370), 2019-06-20
Supplement: f1 [file 5357370.f1.zip › section3.2/IVRawData_1-5-7h.csv]

22:04 02/04/2018
Test Lot:	JK-PERC
Recipe:	Recipe_YJX-LID
Cell Name:	1-5-7h
Test Order:	2
Test Condition:	Light
1	-0.29987389	8.86155700	-2.65734957		1.00000000	34.34000000	304.30586738	0.000000
2	-0.29001203	8.87077430	-2.57263126		2.00000000	17.17000000	152.31119473	0.061797
3	-0.27990231	8.85641860	-2.47893202		3.00000000	11.44666667	101.37647157	0.083231
4	-0.27010447	8.87101750	-2.39610148		4.00000000	8.58500000	76.15768524	0.104733
5	-0.25992328	8.85314940	-2.30113963		5.00000000	6.86800000	60.80343008	0.126132
6	-0.24978007	8.87857910	-2.21769211		6.00000000	5.72333333	50.81506772	0.147477
7	-0.23991896	8.85168930	-2.12368809		7.00000000	4.90571429	43.42385865	0.168851
8	-0.22977129	8.87433530	-2.03906747		8.00000000	4.29250000	38.09308428	0.190326
9	-0.21997938	8.86092760	-1.94922136		9.00000000	3.81555556	33.80936153	0.211705
10	-0.20981830	8.87161830	-1.86142787		10.00000000	3.43400000	30.46513724	0.233046
11	-0.20001152	8.86863800	-1.77382977		11.00000000	3.12181818	27.68627536	0.254417
12	-0.18986459	8.86609270	-1.68335706		12.00000000	2.86166667	25.37180194	0.275901
13	-0.18010990	8.86975960	-1.59753151		13.00000000	2.64153846	23.42981113	0.297345
14	-0.16998678	8.86739640	-1.50734016		14.00000000	2.45285714	21.75045660	0.318729
15	-0.16015916	8.86308570	-1.41950436		15.00000000	2.28933333	20.29055753	0.340082
16	-0.14998245	8.86933230	-1.33024419		16.00000000	2.14625000	19.03580445	0.361540
17	-0.13984372	8.86622140	-1.23988538		17.00000000	2.02000000	17.90976723	0.382911
18	-0.13001981	8.86765480	-1.15297079		18.00000000	1.90777778	16.91751477	0.404289
19	-0.11987362	8.85816380	-1.06186016		19.00000000	1.80736842	16.00996552	0.425700
20	-0.11007725	8.86827370	-0.97619518		20.00000000	1.71700000	15.22682594	0.447171
21	-0.09988120	8.85142230	-0.88409070		21.00000000	1.63523810	14.47418294	0.468543
22	-0.09008781	8.87605290	-0.79962416		22.00000000	1.56090909	13.85471166	0.489960
23	-0.07991334	8.85385700	-0.70754129		23.00000000	1.49304348	13.21919345	0.511314
24	-0.07011846	8.86323550	-0.62147640		24.00000000	1.43083333	12.68181279	0.532794
25	-0.05995888	8.86260510	-0.53139187		25.00000000	1.37360000	12.17367437	0.554190
26	-0.04981939	8.85747340	-0.44127393		26.00000000	1.32076923	11.69867833	0.575604
27	-0.03999176	8.86740300	-0.35462307		27.00000000	1.27185185	11.27802293	0.596988
28	-0.02984707	8.87366770	-0.26485294		28.00000000	1.22642857	10.88291960	0.618477
29	-0.02002762	8.85849950	-0.17741469		29.00000000	1.18413793	10.48968527	0.639857
30	-0.00986581	8.86364650	-0.08744703		30.00000000	1.14466667	10.14592069	0.661248
31	-0.00062766	8.85707470	-0.00555921		31.00000000	1.10774194	9.81135307	0.682709
32	0.00950418	8.85645390	0.08417332		32.00000000	1.07312500	9.50408209	0.704191
33	0.01935088	8.86823750	0.17160819		33.00000000	1.04060606	9.22834169	0.725585
34	0.02946626	8.85416410	0.26089910		34.00000000	1.01000000	8.94270574	0.746960
35	0.03929584	8.86256690	0.34826202		35.00000000	0.98114286	8.69544421	0.768445
36	0.04947523	8.85965630	0.43833353		36.00000000	0.95388889	8.45112770	0.789828
37	0.05925346	8.85531900	0.52470827		37.00000000	0.92810811	8.21869336	0.811185
38	0.06937330	8.86362650	0.61489904		38.00000000	0.90368421	8.00991932	0.832557
39	0.07953930	8.86355590	0.70500102		39.00000000	0.88051282	7.80447461	0.854041
40	0.08936888	8.85926720	0.79174279		40.00000000	0.85850000	7.60568089	0.875418
41	0.09952296	8.85758210	0.88153282		41.00000000	0.83756098	7.41876511	0.896765
42	0.10936147	8.86441900	0.96942589		42.00000000	0.81761905	7.24771782	0.918147
43	0.11949100	8.85314080	1.05787065		43.00000000	0.79860465	7.07015942	0.939626
44	0.12933323	8.86505790	1.14654657		44.00000000	0.78045455	6.91877473	0.961016
45	0.13947168	8.86173250	1.23596072		45.00000000	0.76311111	6.76248653	0.982371
46	0.14927968	8.85868170	1.32242117		46.00000000	0.74652174	6.61319847	1.003749
47	0.15942037	8.86017040	1.41249164		47.00000000	0.73063830	6.47357982	1.025222
48	0.16956626	8.85936550	1.50224947		48.00000000	0.71541667	6.33813773	1.046602
49	0.17938915	8.86286540	1.58990189		49.00000000	0.70081633	6.21124077	1.067946
50	0.18953578	8.86175250	1.67961917		50.00000000	0.68680000	6.08625162	1.089329
51	0.19929838	8.85234830	1.76425868		51.00000000	0.67333333	5.96058119	1.110816
52	0.20943758	8.86589620	1.85685184		52.00000000	0.66038462	5.85490145	1.132183
53	0.21928503	8.85342310	1.94142315		53.00000000	0.64792453	5.73634999	1.153540
54	0.22937585	8.85918240	2.03208249		54.00000000	0.63592593	5.63378377	1.174915
55	0.23926869	8.86864090	2.12198809		55.00000000	0.62436364	5.53725688	1.196383
56	0.24937961	8.85780530	2.20895603		56.00000000	0.61321429	5.43173275	1.217774
57	0.25955901	8.86550240	2.30112103		57.00000000	0.60245614	5.34107636	1.239140
58	0.26938784	8.85662360	2.38586670		58.00000000	0.59206897	5.24373197	1.260511
59	0.27952257	8.86695380	2.47851371		59.00000000	0.58203390	5.16086769	1.281987
60	0.28932014	8.86498830	2.56481966		60.00000000	0.57233333	5.07372830	1.303375
61	0.29949731	8.85543920	2.65218022		61.00000000	0.56295082	4.98517676	1.324765
62	0.30931646	8.86484620	2.74204285		62.00000000	0.55387097	4.90998094	1.346119
63	0.31946012	8.85474300	2.82873726		63.00000000	0.54507937	4.82653769	1.367589
64	0.32928896	8.87984280	2.92403420		64.00000000	0.53656250	4.76459065	1.388974
65	0.33943412	8.84121040	3.00100847		65.00000000	0.52830769	4.67087946	1.410360
66	0.34922647	8.86070060	3.09439119		66.00000000	0.52030303	4.61024937	1.431829
67	0.35939693	8.85632990	3.18293778		67.00000000	0.51253731	4.53919953	1.453221
68	0.36956739	8.86453440	3.27604284		68.00000000	0.50500000	4.47658987	1.474568
69	0.37939176	8.85615350	3.35995166		69.00000000	0.49768116	4.40754074	1.495946
70	0.38954362	8.84623050	3.44599265		70.00000000	0.49057143	4.33970793	1.517423
71	0.39935684	8.85363670	3.53576038		71.00000000	0.48366197	4.28216738	1.538795
72	0.40952060	8.86266520	3.62944397		72.00000000	0.47694444	4.22699893	1.560156
73	0.41933528	8.83776950	3.70598855		73.00000000	0.47041096	4.15738363	1.581527
74	0.42946705	8.86366270	3.80665107		74.00000000	0.46405405	4.11321861	1.603005
75	0.43929067	8.82954030	3.87873467		75.00000000	0.45786667	4.04275219	1.624382
76	0.44946262	8.84040930	3.97343353		76.00000000	0.45184211	3.99446915	1.645727
77	0.45956981	8.82829670	4.05721864		77.00000000	0.44597403	3.93719102	1.667092
78	0.46943215	8.81623080	4.13862218		78.00000000	0.44025641	3.88140212	1.688572
79	0.47958472	8.80747130	4.22392866		79.00000000	0.43468354	3.82846284	1.709953
80	0.48939124	8.78898910	4.30125427		80.00000000	0.42925000	3.77267357	1.731292
81	0.49951780	8.75583080	4.37369334		81.00000000	0.42395062	3.71203987	1.752661
82	0.50933474	8.73547080	4.44927875		82.00000000	0.41878049	3.65824472	1.774144
83	0.51948208	8.68088440	4.50956388		83.00000000	0.41373494	3.59158518	1.795514
84	0.52927446	8.62584590	4.56543993		84.00000000	0.40880952	3.52632795	1.816866
85	0.53938168	8.51606180	4.59340772		85.00000000	0.40400000	3.44048897	1.838249
86	0.54953945	8.38186170	4.60616367		86.00000000	0.39930233	3.34689687	1.859727
87	0.55932218	8.19619940	4.58431612		87.00000000	0.39471264	3.23514353	1.881111
88	0.56944495	7.93631030	4.51929182		88.00000000	0.39022727	3.09696472	1.902470
89	0.57927310	7.59485580	4.39949566		89.00000000	0.38584270	2.93041964	1.923840
90	0.58941448	7.11902330	4.19605542		90.00000000	0.38155556	2.71630289	1.945327
91	0.59920985	6.52956530	3.91257984		91.00000000	0.37736264	2.46401398	1.966695
92	0.60930663	5.74335380	3.49946355		92.00000000	0.37326087	2.14376923	1.988184
93	0.61907816	4.79486270	2.96839478		93.00000000	0.36924731	1.77049016	2.009549
94	0.62924117	3.61484460	2.27460905		94.00000000	0.36531915	1.32057195	2.031027
95	0.63937294	2.19234820	1.40172811		95.00000000	0.36147368	0.79247618	2.052463
96	0.64906335	0.57240218	0.37152528		96.00000000	0.35770833	0.20475303	2.073859
97	0.65917051	-1.37197480	-0.90436533		97.00000000	0.35402062	-0.48570737	2.095355
98	0.66894948	-3.48693540	-2.33258362		98.00000000	0.35040816	-1.22185063	2.116736
99	0.67904103	-6.06245370	-4.11665480		99.00000000	0.34686869	-2.10287535	2.138088
100	0.68900609	-8.89659690	-6.12980944		100.00000000	0.34340000	-3.05509138	2.159462
101	0.69254363	-10.00036900	-6.92569185		101.00000000	0.34000000	-3.40012546	2.180937
22:04 02/04/2018
Test Lot:	JK-PERC
Recipe:	Recipe_YJX-LID
Cell Name:	1-5-7h
Test Order:	3
Test Condition:	Light
1	-0.29990381	8.87289520	-2.66101508		1.00000000	34.34000000	304.69522117	0.000000
2	-0.29006296	8.85177040	-2.56757072		2.00000000	17.17000000	151.98489777	0.061726
3	-0.27993557	8.86911390	-2.48278045		3.00000000	11.44666667	101.52179044	0.083246
4	-0.27015126	8.86861610	-2.39586781		4.00000000	8.58500000	76.13706922	0.104623
5	-0.25993529	8.86174580	-2.30348046		5.00000000	6.86800000	60.86247015	0.125972
6	-0.24979819	8.86671350	-2.21488898		6.00000000	5.72333333	50.74715693	0.147402
7	-0.23995957	8.85622020	-2.12513479		7.00000000	4.90571429	43.44608595	0.168902
8	-0.22983141	8.87277030	-2.03924131		8.00000000	4.29250000	38.08636651	0.190286
9	-0.22000767	8.85858820	-1.94895735		9.00000000	3.81555556	33.80043542	0.211641
10	-0.20986091	8.85866640	-1.85908779		10.00000000	3.43400000	30.42066042	0.233008
11	-0.20002377	8.86692910	-1.77359659		11.00000000	3.12181818	27.68094048	0.254491
12	-0.18985692	8.85793690	-1.68174062		12.00000000	2.86166667	25.34846276	0.275879
13	-0.18008006	8.86535170	-1.59647307		13.00000000	2.64153846	23.41816749	0.297223
14	-0.16992213	8.87318040	-1.50774971		14.00000000	2.45285714	21.76464392	0.318604
15	-0.16011029	8.84744830	-1.41656751		15.00000000	2.28933333	20.25475831	0.340088
16	-0.14997843	8.87800030	-1.33150855		16.00000000	2.14625000	19.05440814	0.361465
17	-0.13981307	8.85621830	-1.23821507		17.00000000	2.02000000	17.88956097	0.382818
18	-0.12998633	8.86846640	-1.15277940		18.00000000	1.90777778	16.91906312	0.404191
19	-0.11980162	8.87129500	-1.06279551		19.00000000	1.80736842	16.03369844	0.425680
20	-0.11004635	8.86074450	-0.97509259		20.00000000	1.71700000	15.21389831	0.447088
21	-0.09985568	8.85480500	-0.88420254		21.00000000	1.63523810	14.47971446	0.468450
22	-0.09004533	8.86910060	-0.79862112		22.00000000	1.56090909	13.84385975	0.489813
23	-0.07991048	8.86094760	-0.70808257		23.00000000	1.49304348	13.22978003	0.511283
24	-0.07010832	8.86163900	-0.62127460		24.00000000	1.43083333	12.67952847	0.532655
25	-0.05994221	8.86639310	-0.53147118		25.00000000	1.37360000	12.17887756	0.554041
26	-0.04977237	8.86076930	-0.44102152		26.00000000	1.32076923	11.70303145	0.575399
27	-0.04000073	8.85723590	-0.35429593		27.00000000	1.27185185	11.26509188	0.596885
28	-0.02981973	8.86251830	-0.26427794		28.00000000	1.22642857	10.86924566	0.618272
29	-0.02000716	8.85249520	-0.17711325		29.00000000	1.18413793	10.48257535	0.639655
30	-0.00989091	8.85729600	-0.08760673		30.00000000	1.14466667	10.13865149	0.661145
31	-0.00063580	8.86980630	-0.00563940		31.00000000	1.10774194	9.82545640	0.682652
32	0.00950703	8.86706730	0.08429950		32.00000000	1.07312500	9.51547160	0.704011
33	0.01933050	8.85178570	0.17110941		33.00000000	1.04060606	9.21122185	0.725384
34	0.02947325	8.85643390	0.26102786		34.00000000	1.01000000	8.94499824	0.746878
35	0.03929745	8.86281010	0.34828587		35.00000000	0.98114286	8.69568282	0.768249
36	0.04942383	8.86995790	0.43838728		36.00000000	0.95388889	8.46095429	0.789593
37	0.05925250	8.85779000	0.52484624		37.00000000	0.92810811	8.22098672	0.810970
38	0.06938632	8.86479090	0.61509520		38.00000000	0.90368421	8.01097157	0.832445
39	0.07954916	8.85322950	0.70426701		39.00000000	0.88051282	7.79538208	0.853826
40	0.08934360	8.86803720	0.79230237		40.00000000	0.85850000	7.61320994	0.875183
41	0.09946105	8.85169220	0.88039859		41.00000000	0.83756098	7.41383195	0.896562
42	0.10933959	8.86371990	0.96915550		42.00000000	0.81761905	7.24714622	0.918040
43	0.11948234	8.85390000	1.05788469		43.00000000	0.79860465	7.07076572	0.939428
44	0.12928571	8.86207770	1.14574001		44.00000000	0.78045455	6.91644882	0.960789
45	0.13947535	8.85984990	1.23573067		45.00000000	0.76311111	6.76104990	0.982164
46	0.14928615	8.85191730	1.32146865		46.00000000	0.74652174	6.60814870	1.003640
47	0.15947951	8.86073590	1.41310582		47.00000000	0.73063830	6.47399300	1.025019
48	0.16958058	8.85142710	1.50103014		48.00000000	0.71541667	6.33245847	1.046376
49	0.17938842	8.86747840	1.59072294		49.00000000	0.70081633	6.21447364	1.067759
50	0.18955648	8.85418890	1.67836888		50.00000000	0.68680000	6.08105694	1.089235
51	0.19931594	8.86642170	1.76721918		51.00000000	0.67333333	5.97005728	1.110621
52	0.20945495	8.86024860	1.85582293		52.00000000	0.66038462	5.85117186	1.131978
53	0.21928810	8.86172390	1.94327060		53.00000000	0.64792453	5.74172828	1.153336
54	0.22943904	8.86148550	2.03317073		54.00000000	0.63592593	5.63524837	1.174826
55	0.23926696	8.86181070	2.12033851		55.00000000	0.62436364	5.53299235	1.196219
56	0.24942459	8.86845590	2.21201098		56.00000000	0.61321429	5.43826385	1.217606
57	0.25955915	8.84675600	2.29625647		57.00000000	0.60245614	5.32978247	1.238960
58	0.26940048	8.86207100	2.38744618		58.00000000	0.59206897	5.24695721	1.260435
59	0.27953058	8.85572910	2.47544709		59.00000000	0.58203390	5.15433453	1.281823
60	0.28934959	8.85503200	2.56219988		60.00000000	0.57233333	5.06802998	1.303210
61	0.29950127	8.86923410	2.65634688		61.00000000	0.56295082	4.99294261	1.324689
62	0.30930611	8.86314390	2.74142456		62.00000000	0.55387097	4.90903809	1.346078
63	0.31941834	8.84470270	2.82516025		63.00000000	0.54507937	4.82106493	1.367424
64	0.32928202	8.86597250	2.91940533		64.00000000	0.53656250	4.75714837	1.388801
65	0.33941507	8.85721780	3.00627320		65.00000000	0.52830769	4.67933630	1.410289
66	0.34923482	8.86072730	3.09447450		66.00000000	0.52030303	4.61026326	1.431664
67	0.35939768	8.85049060	3.18084579		67.00000000	0.51253731	4.53620667	1.453032
68	0.36952627	8.84185410	3.26729737		68.00000000	0.50500000	4.46513632	1.474421
69	0.37936834	8.86784360	3.36417911		69.00000000	0.49768116	4.41335868	1.495896
70	0.38951778	8.84463310	3.44514185		70.00000000	0.49057143	4.33892430	1.517267
71	0.39933604	8.85207460	3.53495242		71.00000000	0.48366197	4.28141186	1.538627
72	0.40946466	8.84666920	3.62239840		72.00000000	0.47694444	4.21936973	1.560009
73	0.41931790	8.85508540	3.71309581		73.00000000	0.47041096	4.16552921	1.581484
74	0.42946661	8.83872990	3.79593937		74.00000000	0.46405405	4.10164844	1.602865
75	0.43927369	8.83853340	3.88253518		75.00000000	0.45786667	4.04686983	1.624203
76	0.44942537	8.83306120	3.96980180		76.00000000	0.45184211	3.99114897	1.645585
77	0.45958373	8.83272360	4.05937606		77.00000000	0.44597403	3.93916530	1.667062
78	0.46942136	8.82181260	4.14114727		78.00000000	0.44025641	3.88385955	1.688444
79	0.47959760	8.80622770	4.22344567		79.00000000	0.43468354	3.82792227	1.709808
80	0.48939276	8.78768630	4.30063005		80.00000000	0.42925000	3.77211434	1.731175
81	0.49952808	8.76329710	4.37751297		81.00000000	0.42395062	3.71520521	1.752664
82	0.50934929	8.74139880	4.45242527		82.00000000	0.41878049	3.66072725	1.774052
83	0.51949728	8.67318530	4.50569617		83.00000000	0.41373494	3.58839980	1.795418
84	0.52926046	8.61153410	4.55774450		84.00000000	0.40880952	3.52047715	1.816785
85	0.53937864	8.51023200	4.59023736		85.00000000	0.40400000	3.43813373	1.838265
86	0.54953700	8.38497830	4.60785582		86.00000000	0.39930233	3.34814134	1.859638
87	0.55935454	8.18562410	4.57866600		87.00000000	0.39471264	3.23096933	1.881033
88	0.56948167	7.93954230	4.52142381		88.00000000	0.39022727	3.09822594	1.902387
89	0.57928425	7.58150100	4.39184412		89.00000000	0.38584270	2.92526679	1.923848
90	0.58940095	7.10926770	4.19020914		90.00000000	0.38155556	2.71258059	1.945231
91	0.59919167	6.51552150	3.90404621		91.00000000	0.37736264	2.45871438	1.966609
92	0.60930467	5.73425630	3.49390914		92.00000000	0.37326087	2.14037349	1.988171
93	0.61909389	4.78496740	2.96234408		93.00000000	0.36924731	1.76683635	2.009582
94	0.62921578	3.60730650	2.26977417		94.00000000	0.36531915	1.31781814	2.030940
95	0.63930494	2.17423300	1.38999790		95.00000000	0.36147368	0.78592801	2.052319
96	0.64904952	0.57024801	0.37011920		96.00000000	0.35770833	0.20398247	2.073819
97	0.65913570	-1.35977010	-0.89627302		97.00000000	0.35402062	-0.48138665	2.095184
98	0.66891378	-3.49615600	-2.33862693		98.00000000	0.35040816	-1.22508160	2.116522
99	0.67905134	-6.04643110	-4.10583714		99.00000000	0.34686869	-2.09731762	2.137905
100	0.68894774	-8.84609790	-6.09449916		100.00000000	0.34340000	-3.03775002	2.159422
101	0.69263256	-10.00028900	-6.92652577		101.00000000	0.34000000	-3.40009826	2.180826
22:04 02/04/2018
Test Lot:	JK-PERC
Recipe:	Recipe_YJX-LID
Cell Name:	1-5-7h
Test Order:	4
Test Condition:	Light
1	-0.29989755	8.85791680	-2.65646755		1.00000000	34.34000000	304.18086291	0.000000
2	-0.29005209	8.85940070	-2.56968769		2.00000000	17.17000000	152.11591002	0.061781
3	-0.27992007	8.85760690	-2.47942194		3.00000000	11.44666667	101.39007365	0.083210
4	-0.27008876	8.86236760	-2.39362588		4.00000000	8.58500000	76.08342585	0.104718
5	-0.25992027	8.86285690	-2.30363616		5.00000000	6.86800000	60.87010119	0.126101
6	-0.24976073	8.86444570	-2.21399043		6.00000000	5.72333333	50.73417756	0.147450
7	-0.23995396	8.84720330	-2.12292147		7.00000000	4.90571429	43.40185162	0.168872
8	-0.22982642	8.87469390	-2.03963913		8.00000000	4.29250000	38.09462357	0.190374
9	-0.21996085	8.86620140	-1.95021720		9.00000000	3.81555556	33.82948401	0.211751
10	-0.20986308	8.86843110	-1.86115627		10.00000000	3.43400000	30.45419240	0.233093
11	-0.20005037	8.86406330	-1.77325914		11.00000000	3.12181818	27.67199397	0.254468
12	-0.18988262	8.87441350	-1.68509689		12.00000000	2.86166667	25.39561330	0.275943
13	-0.18011606	8.84990020	-1.59400916		13.00000000	2.64153846	23.37735176	0.297319
14	-0.16995056	8.86222460	-1.50614003		14.00000000	2.45285714	21.73777091	0.318678
15	-0.16016909	8.86493110	-1.41988795		15.00000000	2.28933333	20.29478226	0.340055
16	-0.14998946	8.85767360	-1.32855768		16.00000000	2.14625000	19.01078196	0.361526
17	-0.13986786	8.86073590	-1.23933217		17.00000000	2.02000000	17.89868652	0.382886
18	-0.13004918	8.86285880	-1.15260752		18.00000000	1.90777778	16.90836507	0.404268
19	-0.11990006	8.85873510	-1.06216287		19.00000000	1.80736842	16.01099807	0.425655
20	-0.11005533	8.86190030	-0.97529936		20.00000000	1.71700000	15.21588282	0.447129
21	-0.09989876	8.86881160	-0.88598331		21.00000000	1.63523810	14.50261859	0.468504
22	-0.09008233	8.85656740	-0.79782018		22.00000000	1.56090909	13.82429657	0.489888
23	-0.07994510	8.85772510	-0.70813174		23.00000000	1.49304348	13.22496869	0.511235
24	-0.07011899	8.84698770	-0.62034188		24.00000000	1.43083333	12.65856490	0.532712
25	-0.05998549	8.86247160	-0.53161969		25.00000000	1.37360000	12.17349099	0.554092
26	-0.04981031	8.85977940	-0.44130831		26.00000000	1.32076923	11.70172402	0.575469
27	-0.03996484	8.85533710	-0.35390217		27.00000000	1.27185185	11.26267689	0.596859
28	-0.02982241	8.86370280	-0.26433697		28.00000000	1.22642857	10.87069836	0.618333
29	-0.02002830	8.86283210	-0.17750748		29.00000000	1.18413793	10.49481567	0.639707
30	-0.00985907	8.86852460	-0.08743543		30.00000000	1.14466667	10.15150449	0.661085
31	-0.00064700	8.85820390	-0.00573127		31.00000000	1.10774194	9.81260393	0.682682
32	0.00951532	8.86609460	0.08436374		32.00000000	1.07312500	9.51442777	0.704057
33	0.01934860	8.84614850	0.17116054		33.00000000	1.04060606	9.20535574	0.725422
34	0.02947362	8.86615660	0.26131774		34.00000000	1.01000000	8.95481817	0.746792
35	0.03930987	8.86686900	0.34855547		35.00000000	0.98114286	8.69966518	0.768272
36	0.04942969	8.85879990	0.43788772		36.00000000	0.95388889	8.45031079	0.789654
37	0.05923989	8.84693430	0.52409141		37.00000000	0.92810811	8.21091146	0.811003
38	0.06940660	8.87536810	0.61600911		38.00000000	0.90368421	8.02053001	0.832378
39	0.07955916	8.84009080	0.70331022		39.00000000	0.88051282	7.78381328	0.853862
40	0.08935597	8.85998150	0.79169222		40.00000000	0.85850000	7.60629412	0.875243
41	0.09950109	8.86756610	0.88233247		41.00000000	0.83756098	7.42712731	0.896583
42	0.10933138	8.84566970	0.96710928		42.00000000	0.81761905	7.23238804	0.917970
43	0.11948767	8.87319850	1.06023781		43.00000000	0.79860465	7.08617759	0.939458
44	0.12929787	8.85065750	1.14437116		44.00000000	0.78045455	6.90753588	0.960849
45	0.13943927	8.85705280	1.23502098		45.00000000	0.76311111	6.75891540	0.982196
46	0.14925766	8.85769840	1.32207934		46.00000000	0.74652174	6.61246441	1.003562
47	0.15939236	8.85798740	1.41189552		47.00000000	0.73063830	6.47198484	1.025029
48	0.16956055	8.85988620	1.50228718		48.00000000	0.71541667	6.33851025	1.046408
49	0.17937523	8.86144830	1.58952433		49.00000000	0.70081633	6.21024765	1.067745
50	0.18952556	8.86008830	1.67921320		50.00000000	0.68680000	6.08510864	1.089116
51	0.19930451	8.85617640	1.76507590		51.00000000	0.67333333	5.96315878	1.110596
52	0.20946451	8.85723970	1.85527737		52.00000000	0.66038462	5.84918483	1.131962
53	0.21927546	8.86654000	1.94421464		53.00000000	0.64792453	5.74484875	1.153374
54	0.22939602	8.84639070	2.02932682		54.00000000	0.63592593	5.62564920	1.174734
55	0.23923747	8.86896990	2.12178992		55.00000000	0.62436364	5.53746230	1.196205
56	0.24937962	8.85368350	2.20792823		56.00000000	0.61321429	5.42920520	1.217598
57	0.25954854	8.85481450	2.29825418		57.00000000	0.60245614	5.33463737	1.238979
58	0.26933643	8.86619950	2.38799052		58.00000000	0.59206897	5.24940157	1.260332
59	0.27950165	8.85256860	2.47430753		59.00000000	0.58203390	5.15249501	1.281803
60	0.28932747	8.86400990	2.56460156		60.00000000	0.57233333	5.07316833	1.303170
61	0.29945028	8.85021400	2.65019906		61.00000000	0.56295082	4.98223523	1.324563
62	0.30931407	8.85102180	2.73774558		62.00000000	0.55387097	4.90232401	1.346051
63	0.31946066	8.86307910	2.83140510		63.00000000	0.54507937	4.83108153	1.367425
64	0.32927534	8.84700780	2.91310150		64.00000000	0.53656250	4.74697262	1.388786
65	0.33941898	8.86033730	3.00736665		65.00000000	0.52830769	4.68098435	1.410167
66	0.34925076	8.85192300	3.09154084		66.00000000	0.52030303	4.60568236	1.431644
67	0.35940182	8.85094170	3.18104456		67.00000000	0.51253731	4.53643788	1.453033
68	0.36956111	8.85688590	3.27316058		68.00000000	0.50500000	4.47272738	1.474399
69	0.37938693	8.85692120	3.36020014		69.00000000	0.49768116	4.40792281	1.495767
70	0.38953653	8.83981320	3.44343016		70.00000000	0.49057143	4.33655979	1.517264
71	0.39933333	8.84421250	3.53178883		71.00000000	0.48366197	4.27760926	1.538642
72	0.40950003	8.84349820	3.62141278		72.00000000	0.47694444	4.21785734	1.559999
73	0.41929087	8.84689430	3.70942201		73.00000000	0.47041096	4.16167603	1.581393
74	0.42945534	8.83916760	3.79602773		74.00000000	0.46405405	4.10185156	1.602863
75	0.43928564	8.83891580	3.88280878		75.00000000	0.45786667	4.04704491	1.624250
76	0.44943970	8.82900620	3.96810590		76.00000000	0.45184211	3.98931675	1.645588
77	0.45956844	8.82054810	4.05364553		77.00000000	0.44597403	3.93373535	1.666958
78	0.46943298	8.82055470	4.14065928		78.00000000	0.44025641	3.88330575	1.688433
79	0.47956026	8.80193420	4.22105785		79.00000000	0.43468354	3.82605595	1.709814
80	0.48936003	8.78064440	4.29689641		80.00000000	0.42925000	3.76909161	1.731165
81	0.49951929	8.75813010	4.37485493		81.00000000	0.42395062	3.71301466	1.752540
82	0.50935030	8.73615260	4.44976195		82.00000000	0.41878049	3.65853025	1.774012
83	0.51947534	8.68335060	4.51078651		83.00000000	0.41373494	3.59260554	1.795379
84	0.52925283	8.60848430	4.55606468		84.00000000	0.40880952	3.51923037	1.816753
85	0.53937489	8.51690960	4.59380718		85.00000000	0.40400000	3.44083148	1.838117
86	0.54951775	8.38074300	4.60536704		86.00000000	0.39930233	3.34645017	1.859592
87	0.55933315	8.19867320	4.58578971		87.00000000	0.39471264	3.23611997	1.880966
88	0.56945819	7.94476560	4.52421184		88.00000000	0.39022727	3.10026421	1.902351
89	0.57926095	7.59976630	4.40224785		89.00000000	0.38584270	2.93231432	1.923704
90	0.58940083	7.11510610	4.19364944		90.00000000	0.38155556	2.71480826	1.945180
91	0.59918797	6.53215790	3.91399043		91.00000000	0.37736264	2.46499233	1.966549
92	0.60929590	5.73743720	3.49579696		92.00000000	0.37326087	2.14156080	1.988029
93	0.61913216	4.79719690	2.97009888		93.00000000	0.36924731	1.77135206	2.009548
94	0.62917829	3.61049250	2.27164350		94.00000000	0.36531915	1.31898205	2.030929
95	0.63932860	2.17778300	1.39231896		95.00000000	0.36147368	0.78721124	2.052297
96	0.64905918	0.56695610	0.36798806		96.00000000	0.35770833	0.20280492	2.073673
97	0.65919316	-1.38174490	-0.91083679		97.00000000	0.35402062	-0.48916618	2.095155
98	0.66894674	-3.51703360	-2.35270816		98.00000000	0.35040816	-1.23239728	2.116546
99	0.67903161	-6.08759400	-4.13366875		99.00000000	0.34686869	-2.11159574	2.137893
100	0.68899739	-8.93553070	-6.15655733		100.00000000	0.34340000	-3.06846124	2.159272
101	0.69235623	-10.00017800	-6.92368554		101.00000000	0.34000000	-3.40006052	2.180778
