# Supplementary material for: Study on the Electrical Injection Regeneration of Industrialized B-Doped Czochralski Silicon PERC Solar Cells
Source: Hindawi journal article supplement (doi:10.1155/2019/5357370), 2019-06-20
Supplement: f1 [file 5357370.f1.zip › section3.2/IVRawData_1-5-8h.csv]

23:00 02/04/2018
Test Lot:	JK-PERC
Recipe:	Recipe_YJX-LID
Cell Name:	1-5-8h
Test Order:	2
Test Condition:	Light
1	-0.29981622	8.85833840	-2.65587353		1.00000000	34.34000000	304.19534066	0.000000
2	-0.28998545	8.85797310	-2.56868332		2.00000000	17.17000000	152.09139813	0.061819
3	-0.27983835	8.85166450	-2.47703519		3.00000000	11.44666667	101.32205298	0.083241
4	-0.27005523	8.86964800	-2.39529483		4.00000000	8.58500000	76.14592808	0.104740
5	-0.25987762	8.87041570	-2.30522252		5.00000000	6.86800000	60.92201503	0.126122
6	-0.24972606	8.85964010	-2.21248302		6.00000000	5.72333333	50.70667351	0.147471
7	-0.23991019	8.85251900	-2.12380952		7.00000000	4.90571429	43.42792892	0.168866
8	-0.22974746	8.86342330	-2.03634899		8.00000000	4.29250000	38.04624452	0.190356
9	-0.21992861	8.84670640	-1.94564384		9.00000000	3.81555556	33.75509975	0.211735
10	-0.20977779	8.86930270	-1.86058272		10.00000000	3.43400000	30.45718547	0.233129
11	-0.19997680	8.85206700	-1.77020803		11.00000000	3.12181818	27.63454371	0.254475
12	-0.18981706	8.86774250	-1.68324881		12.00000000	2.86166667	25.37652312	0.275960
13	-0.18001458	8.85663320	-1.59432311		13.00000000	2.64153846	23.39513724	0.297355
14	-0.16986823	8.87269690	-1.50718932		14.00000000	2.45285714	21.76345797	0.318740
15	-0.16003671	8.85687640	-1.41742536		15.00000000	2.28933333	20.27634237	0.340136
16	-0.14988963	8.86257740	-1.32840845		16.00000000	2.14625000	19.02130674	0.361620
17	-0.13976113	8.85492710	-1.23757462		17.00000000	2.02000000	17.88695274	0.382989
18	-0.12992740	8.86265750	-1.15150205		18.00000000	1.90777778	16.90798103	0.404378
19	-0.11978403	8.86092000	-1.06139671		19.00000000	1.80736842	16.01494699	0.425741
20	-0.10997113	8.86348820	-0.97472781		20.00000000	1.71700000	15.21860924	0.447229
21	-0.09983446	8.85363770	-0.88389811		21.00000000	1.63523810	14.47780565	0.468627
22	-0.08999402	8.84683040	-0.79616184		22.00000000	1.56090909	13.80909800	0.489997
23	-0.07984842	8.86742880	-0.70805014		23.00000000	1.49304348	13.23945674	0.511361
24	-0.07002435	8.85508920	-0.62007186		24.00000000	1.43083333	12.67015680	0.532836
25	-0.05988023	8.86332510	-0.53073798		25.00000000	1.37360000	12.17466336	0.554209
26	-0.04971825	8.86160280	-0.44058341		26.00000000	1.32076923	11.70413231	0.575587
27	-0.03990982	8.86149600	-0.35366072		27.00000000	1.27185185	11.27051010	0.596941
28	-0.02975008	8.85413650	-0.26341122		28.00000000	1.22642857	10.85896598	0.618415
29	-0.01997067	8.85492710	-0.17683881		29.00000000	1.18413793	10.48545506	0.639783
30	-0.00981092	8.87419890	-0.08706408		30.00000000	1.14466667	10.15799967	0.661178
31	-0.00062621	8.85933300	-0.00554784		31.00000000	1.10774194	9.81385468	0.682771
32	0.00950504	8.84933850	0.08411332		32.00000000	1.07312500	9.49644638	0.704148
33	0.01933552	8.86244680	0.17136004		33.00000000	1.04060606	9.22231585	0.725493
34	0.02945479	8.85073380	0.26069649		34.00000000	1.01000000	8.93924114	0.746872
35	0.03929644	8.86664390	0.34842751		35.00000000	0.98114286	8.69944433	0.768362
36	0.04944175	8.85376930	0.43774586		36.00000000	0.95388889	8.44551216	0.789739
37	0.05925884	8.86277100	0.52519750		37.00000000	0.92810811	8.22560963	0.811080
38	0.06940564	8.84432700	0.61384616		38.00000000	0.90368421	7.99247866	0.832462
39	0.07957403	8.86526780	0.70544505		39.00000000	0.88051282	7.80598196	0.853946
40	0.08939260	8.84887790	0.79102422		40.00000000	0.85850000	7.59676168	0.875322
41	0.09954238	8.84941200	0.88089152		41.00000000	0.83756098	7.41192215	0.896686
42	0.10936840	8.87475970	0.97061827		42.00000000	0.81761905	7.25617257	0.918057
43	0.11949957	8.85086730	1.05767484		43.00000000	0.79860465	7.06834379	0.939529
44	0.12933154	8.87016680	1.14719233		44.00000000	0.78045455	6.92276200	0.960921
45	0.13948877	8.85576340	1.23527954		45.00000000	0.76311111	6.75793145	0.982297
46	0.14930883	8.84700010	1.32093523		46.00000000	0.74652174	6.60447790	1.003669
47	0.15945415	8.85955520	1.41269284		47.00000000	0.73063830	6.47313033	1.025152
48	0.16962031	8.86148260	1.50308743		48.00000000	0.71541667	6.33965234	1.046522
49	0.17943367	8.85879900	1.58956682		49.00000000	0.70081633	6.20839097	1.067877
50	0.18958420	8.85826020	1.67938617		50.00000000	0.68680000	6.08385311	1.089251
51	0.19936779	8.85354230	1.76511116		51.00000000	0.67333333	5.96138515	1.110718
52	0.20951310	8.86048600	1.85638789		52.00000000	0.66038462	5.85132864	1.132102
53	0.21930414	8.84228800	1.93915037		53.00000000	0.64792453	5.72913528	1.153464
54	0.22946359	8.86217500	2.03354649		54.00000000	0.63592593	5.63568684	1.174825
55	0.23930673	8.85490420	2.11903817		55.00000000	0.62436364	5.52868019	1.196295
56	0.24946173	8.84435560	2.20632825		56.00000000	0.61321429	5.42348520	1.217670
57	0.25957727	8.85813330	2.29937006		57.00000000	0.60245614	5.33663680	1.239057
58	0.26939583	8.85936640	2.38667636		58.00000000	0.59206897	5.24535590	1.260428
59	0.27957094	8.84898280	2.47391844		59.00000000	0.58203390	5.15040796	1.281910
60	0.28938502	8.86675070	2.56590483		60.00000000	0.57233333	5.07473698	1.303292
61	0.29950207	8.84436890	2.64890679		61.00000000	0.56295082	4.97894472	1.324670
62	0.30930948	8.85776620	2.73979106		62.00000000	0.55387097	4.90605954	1.346144
63	0.31948084	8.84644320	2.82626910		63.00000000	0.54507937	4.82201364	1.367536
64	0.32928750	8.84969230	2.91409305		64.00000000	0.53656250	4.74841302	1.388881
65	0.33945069	8.84943010	3.00394515		65.00000000	0.52830769	4.67522199	1.410242
66	0.34921494	8.86251740	3.09492348		66.00000000	0.52030303	4.61119466	1.431734
67	0.35938480	8.84802150	3.17984444		67.00000000	0.51253731	4.53494117	1.453117
68	0.36958519	8.85730740	3.27352964		68.00000000	0.50500000	4.47294024	1.474457
69	0.37937698	8.83976080	3.35360176		69.00000000	0.49768116	4.39938240	1.495846
70	0.38954461	8.84484770	3.44546275		70.00000000	0.49057143	4.33902957	1.517332
71	0.39934236	8.84284020	3.53132067		71.00000000	0.48366197	4.27694553	1.538704
72	0.40950850	8.84882450	3.62366885		72.00000000	0.47694444	4.22039769	1.560070
73	0.41932634	8.84041500	3.70701887		73.00000000	0.47041096	4.15862810	1.581444
74	0.42947760	8.83815100	3.79578788		74.00000000	0.46405405	4.10137980	1.602924
75	0.43928576	8.84152700	3.88395691		75.00000000	0.45786667	4.04824050	1.624308
76	0.44942439	8.83419900	3.97030450		76.00000000	0.45184211	3.99166307	1.645643
77	0.45960245	8.82338330	4.05524858		77.00000000	0.44597403	3.93499977	1.667021
78	0.46945524	8.81745530	4.13940059		78.00000000	0.44025641	3.88194122	1.688495
79	0.47960874	8.79590890	4.21859478		79.00000000	0.43468354	3.82343686	1.709873
80	0.48943552	8.77865700	4.29658655		80.00000000	0.42925000	3.76823852	1.731261
81	0.49952054	8.76136110	4.37647983		81.00000000	0.42395062	3.71438445	1.752633
82	0.50933617	8.71567340	4.43920771		82.00000000	0.41878049	3.64995396	1.774116
83	0.51949263	8.67331220	4.50572177		83.00000000	0.41373494	3.58845230	1.795495
84	0.52929038	8.62426850	4.56474235		84.00000000	0.40880952	3.52568310	1.816857
85	0.53942454	8.51565740	4.59355458		85.00000000	0.40400000	3.44032559	1.838212
86	0.54952663	8.39590740	4.61377470		86.00000000	0.39930233	3.35250535	1.859702
87	0.55934447	8.19665150	4.58475169		87.00000000	0.39471264	3.23532198	1.881075
88	0.56949204	7.94780350	4.52621083		88.00000000	0.39022727	3.10144968	1.902461
89	0.57929128	7.61446430	4.41099277		89.00000000	0.38584270	2.93798544	1.923809
90	0.58939117	7.14812990	4.21304465		90.00000000	0.38155556	2.72740868	1.945275
91	0.59917474	6.56234600	3.93199196		91.00000000	0.37736264	2.47638419	1.966669
92	0.60931116	5.78297280	3.52362987		92.00000000	0.37326087	2.15855746	1.988152
93	0.61909026	4.83554940	2.99364154		93.00000000	0.36924731	1.78551362	2.009660
94	0.62924528	3.64370800	2.29278606		94.00000000	0.36531915	1.33111631	2.031101
95	0.63937569	2.22259260	1.42107168		95.00000000	0.36147368	0.80340874	2.052471
96	0.64907444	0.57487410	0.37313608		96.00000000	0.35770833	0.20563726	2.073861
97	0.65917361	-1.39183400	-0.91746024		97.00000000	0.35402062	-0.49273793	2.095352
98	0.66894233	-3.57962800	-2.39456469		98.00000000	0.35040816	-1.25433087	2.116736
99	0.67905486	-6.21671770	-4.22149237		99.00000000	0.34686869	-2.15638471	2.138078
100	0.68898064	-9.13734340	-6.29545270		100.00000000	0.34340000	-3.13776372	2.159466
101	0.69159979	-10.00032400	-6.91622198		101.00000000	0.34000000	-3.40011016	2.180960
23:00 02/04/2018
Test Lot:	JK-PERC
Recipe:	Recipe_YJX-LID
Cell Name:	1-5-8h
Test Order:	3
Test Condition:	Light
1	-0.29984981	8.85210700	-2.65430260		1.00000000	34.34000000	303.98135438	0.000000
2	-0.28997421	8.84685710	-2.56536040		2.00000000	17.17000000	151.90053641	0.061716
3	-0.27986044	8.85324670	-2.47767352		3.00000000	11.44666667	101.34016389	0.083087
4	-0.27003545	8.86339000	-2.39342951		4.00000000	8.58500000	76.09220315	0.104588
5	-0.25987107	8.86456300	-2.30364347		5.00000000	6.86800000	60.88181868	0.126039
6	-0.24970073	8.85550790	-2.21122679		6.00000000	5.72333333	50.68302355	0.147434
7	-0.23993008	8.85936640	-2.12562849		7.00000000	4.90571429	43.46152031	0.168781
8	-0.22975527	8.86493680	-2.03676595		8.00000000	4.29250000	38.05274121	0.190278
9	-0.21993400	8.86372660	-1.94943485		9.00000000	3.81555556	33.82004127	0.211650
10	-0.20978747	8.85390760	-1.85743888		10.00000000	3.43400000	30.40431870	0.233052
11	-0.19995803	8.86928080	-1.77348392		11.00000000	3.12181818	27.68828206	0.254459
12	-0.18981373	8.84310340	-1.67854244		12.00000000	2.86166667	25.30601423	0.275918
13	-0.18002969	8.86105350	-1.59525271		13.00000000	2.64153846	23.40681363	0.297298
14	-0.16990326	8.86059090	-1.50544328		14.00000000	2.45285714	21.73376368	0.318654
15	-0.16007529	8.85775950	-1.41790842		15.00000000	2.28933333	20.27836408	0.340017
16	-0.14993994	8.83818240	-1.32519654		16.00000000	2.14625000	18.96894898	0.361502
17	-0.13978671	8.87123970	-1.24008141		17.00000000	2.02000000	17.91990419	0.382884
18	-0.12996173	8.86504840	-1.15211703		18.00000000	1.90777778	16.91254234	0.404244
19	-0.11980553	8.83846760	-1.05889730		19.00000000	1.80736842	15.97436723	0.425614
20	-0.11001255	8.85730360	-0.97441456		20.00000000	1.71700000	15.20799028	0.447092
21	-0.09983327	8.84494110	-0.88301941		21.00000000	1.63523810	14.46358464	0.468459
22	-0.09004179	8.85949610	-0.79772485		22.00000000	1.56090909	13.82886800	0.489851
23	-0.07985953	8.84772780	-0.70657540		23.00000000	1.49304348	13.21004229	0.511194
24	-0.07005837	8.86211970	-0.62086564		24.00000000	1.43083333	12.68021627	0.532665
25	-0.05991333	8.85326000	-0.53042829		25.00000000	1.37360000	12.16083794	0.554042
26	-0.04977127	8.85517600	-0.44073337		26.00000000	1.32076923	11.69564399	0.575418
27	-0.03993066	8.86507700	-0.35398835		27.00000000	1.27185185	11.27506460	0.596900
28	-0.02977371	8.84225940	-0.26326687		28.00000000	1.22642857	10.84439956	0.618272
29	-0.01996659	8.86739160	-0.17705160		29.00000000	1.18413793	10.50021474	0.639615
30	-0.00982155	8.85609720	-0.08698063		30.00000000	1.14466667	10.13727926	0.660996
31	-0.00063296	8.84848210	-0.00560076		31.00000000	1.10774194	9.80183469	0.682592
32	0.00950442	8.85737900	0.08418428		32.00000000	1.07312500	9.50507484	0.703959
33	0.01935592	8.85524270	0.17140138		33.00000000	1.04060606	9.21481922	0.725332
34	0.02948653	8.84841730	0.26090910		34.00000000	1.01000000	8.93690147	0.746712
35	0.03931049	8.84313680	0.34762800		35.00000000	0.98114286	8.67638051	0.768185
36	0.04946193	8.85573480	0.43802174		36.00000000	0.95388889	8.44738703	0.789573
37	0.05928142	8.84427550	0.52430125		37.00000000	0.92810811	8.20844380	0.810915
38	0.06942096	8.86843110	0.61565504		38.00000000	0.90368421	8.01426116	0.832291
39	0.07955306	8.84581380	0.70371156		39.00000000	0.88051282	7.78885246	0.853776
40	0.08940455	8.86202810	0.79230566		40.00000000	0.85850000	7.60805112	0.875154
41	0.09954112	8.86233810	0.88216706		41.00000000	0.83756098	7.42274855	0.896514
42	0.10935540	8.84796810	0.96757309		42.00000000	0.81761905	7.23426725	0.917892
43	0.11950015	8.86806580	1.05973519		43.00000000	0.79860465	7.08207859	0.939374
44	0.12935612	8.85657790	1.14565255		44.00000000	0.78045455	6.91215648	0.960755
45	0.13949342	8.85047630	1.23458321		45.00000000	0.76311111	6.75389680	0.982111
46	0.14929356	8.85494420	1.32198614		46.00000000	0.74652174	6.61040834	1.003482
47	0.15941449	8.85207180	1.41114851		47.00000000	0.73063830	6.46766267	1.024949
48	0.16960761	8.85474870	1.50183276		48.00000000	0.71541667	6.33483480	1.046319
49	0.17940404	8.84724040	1.58723067		49.00000000	0.70081633	6.20029052	1.067663
50	0.18951976	8.85246560	1.67771716		50.00000000	0.68680000	6.07987337	1.089025
51	0.19931617	8.85715200	1.76537361		51.00000000	0.67333333	5.96381568	1.110495
52	0.20946687	8.84673020	1.85309688		52.00000000	0.66038462	5.84224452	1.131884
53	0.21932061	8.86801720	1.94493894		53.00000000	0.64792453	5.74580586	1.153272
54	0.22944228	8.85014250	2.03059687		54.00000000	0.63592593	5.62803506	1.174611
55	0.23926327	8.84950350	2.11736115		55.00000000	0.62436364	5.52530819	1.196084
56	0.24940801	8.85373880	2.20819338		56.00000000	0.61321429	5.42923911	1.217459
57	0.25955573	8.85554980	2.29850869		57.00000000	0.60245614	5.33508035	1.238835
58	0.26938713	8.84238820	2.38202558		58.00000000	0.59206897	5.23530363	1.260327
59	0.27953413	8.85425950	2.47506773		59.00000000	0.58203390	5.15347917	1.281690
60	0.28936777	8.85679440	2.56287084		60.00000000	0.57233333	5.06903866	1.303037
61	0.29948273	8.83674720	2.64645318		61.00000000	0.56295082	4.97465408	1.324426
62	0.30934092	8.84731770	2.73683740		62.00000000	0.55387097	4.90027242	1.345893
63	0.31947899	8.84380820	2.82541091		63.00000000	0.54507937	4.82057736	1.367269
64	0.32927018	8.84839730	2.91351337		64.00000000	0.53656250	4.74771818	1.388627
65	0.33944097	8.85393430	3.00538805		65.00000000	0.52830769	4.67760160	1.409999
66	0.34927461	8.84660630	3.08989497		66.00000000	0.52030303	4.60291607	1.431533
67	0.35942605	8.84556390	3.17932609		67.00000000	0.51253731	4.53368156	1.452899
68	0.36957231	8.84510610	3.26890629		68.00000000	0.50500000	4.46677858	1.474255
69	0.37938139	8.84987740	3.35747879		69.00000000	0.49768116	4.40441725	1.495633
70	0.38956854	8.84684180	3.44645124		70.00000000	0.49057143	4.34000782	1.517106
71	0.39938134	8.84900950	3.53412927		71.00000000	0.48366197	4.27992938	1.538476
72	0.40954843	8.84776120	3.62358671		72.00000000	0.47694444	4.21989055	1.559839
73	0.41934782	8.84600730	3.70955388		73.00000000	0.47041096	4.16125878	1.581215
74	0.42950523	8.83643720	3.79529599		74.00000000	0.46405405	4.10058451	1.602688
75	0.43930164	8.83302590	3.88036276		75.00000000	0.45786667	4.04434813	1.624095
76	0.44946054	8.82820610	3.96793028		76.00000000	0.45184211	3.98895523	1.645439
77	0.45960006	8.81814860	4.05282163		77.00000000	0.44597403	3.93266523	1.666808
78	0.46945974	8.80687240	4.13447203		78.00000000	0.44025641	3.87728203	1.688296
79	0.47961938	8.80786990	4.22442510		79.00000000	0.43468354	3.82863611	1.709675
80	0.48939571	8.76750850	4.29078105		80.00000000	0.42925000	3.76345302	1.731055
81	0.49955088	8.76538560	4.37875609		81.00000000	0.42395062	3.71609064	1.752419
82	0.50937706	8.71446420	4.43894815		82.00000000	0.41878049	3.64944757	1.773897
83	0.51950991	8.67260170	4.50550253		83.00000000	0.41373494	3.58815834	1.795280
84	0.52928847	8.61461450	4.55961613		84.00000000	0.40880952	3.52173645	1.816666
85	0.53938633	8.50771710	4.58894630		85.00000000	0.40400000	3.43711771	1.838006
86	0.54953480	8.38522340	4.60797206		86.00000000	0.39930233	3.34823920	1.859477
87	0.55939001	8.20582200	4.59025485		87.00000000	0.39471264	3.23894170	1.880855
88	0.56946552	7.96111490	4.53358044		88.00000000	0.39022727	3.10664416	1.902242
89	0.57927388	7.60316750	4.40431634		89.00000000	0.38584270	2.93362665	1.923727
90	0.58941120	7.15518670	4.21734718		90.00000000	0.38155556	2.73010124	1.945105
91	0.59919792	6.55513140	3.92782110		91.00000000	0.37736264	2.47366167	1.966448
92	0.60930175	5.76734500	3.51405340		92.00000000	0.37326087	2.15272421	1.987929
93	0.61914724	4.85435870	3.00556279		93.00000000	0.36924731	1.79245890	2.009435
94	0.62924439	3.64257980	2.29207290		94.00000000	0.36531915	1.33070415	2.030874
95	0.63935339	2.21775530	1.41792937		95.00000000	0.36147368	0.80166018	2.052240
96	0.64903295	0.57183355	0.37113882		96.00000000	0.35770833	0.20454963	2.073616
97	0.65916282	-1.38456260	-0.91265219		97.00000000	0.35402062	-0.49016371	2.095087
98	0.66895103	-3.58337240	-2.39710066		98.00000000	0.35040816	-1.25564294	2.116460
99	0.67904222	-6.21397640	-4.21955233		99.00000000	0.34686869	-2.15543383	2.137864
100	0.68897110	-9.13261990	-6.29211118		100.00000000	0.34340000	-3.13614167	2.159258
101	0.69167739	-10.00025900	-6.91695304		101.00000000	0.34000000	-3.40008806	2.180745
23:01 02/04/2018
Test Lot:	JK-PERC
Recipe:	Recipe_YJX-LID
Cell Name:	1-5-8h
Test Order:	4
Test Condition:	Light
1	-0.29983732	8.87451270	-2.66091010		1.00000000	34.34000000	304.75076612	0.000000
2	-0.28996542	8.85727880	-2.56830457		2.00000000	17.17000000	152.07947700	0.061804
3	-0.27987695	8.85605240	-2.47860493		3.00000000	11.44666667	101.37227981	0.083230
4	-0.27003708	8.85570240	-2.39136802		4.00000000	8.58500000	76.02620510	0.104742
5	-0.25990543	8.85091110	-2.30039986		5.00000000	6.86800000	60.78805743	0.126131
6	-0.24974774	8.86565020	-2.21417610		6.00000000	5.72333333	50.74107131	0.147471
7	-0.23991680	8.84012220	-2.12089383		7.00000000	4.90571429	43.36711376	0.168838
8	-0.22977845	8.86650750	-2.03733235		8.00000000	4.29250000	38.05948344	0.190321
9	-0.21995719	8.84048750	-1.94452879		9.00000000	3.81555556	33.73137119	0.211709
10	-0.20982331	8.86405280	-1.85988490		10.00000000	3.43400000	30.43915732	0.233071
11	-0.19999088	8.85784150	-1.77148752		11.00000000	3.12181818	27.65257065	0.254436
12	-0.18983914	8.85693360	-1.68139266		12.00000000	2.86166667	25.34559165	0.275915
13	-0.18004616	8.85748580	-1.59475631		13.00000000	2.64153846	23.39738941	0.297274
14	-0.16988027	8.84288880	-1.50223234		14.00000000	2.45285714	21.69034296	0.318654
15	-0.16009176	8.84863950	-1.41659427		15.00000000	2.28933333	20.25748536	0.340003
16	-0.14993554	8.85667510	-1.32793036		16.00000000	2.14625000	19.00863893	0.361464
17	-0.13978456	8.84482670	-1.23637021		17.00000000	2.02000000	17.86654993	0.382839
18	-0.12997296	8.85597900	-1.15103780		18.00000000	1.90777778	16.89523994	0.404227
19	-0.11981378	8.85807990	-1.06132004		19.00000000	1.80736842	16.00981388	0.425697
20	-0.11000219	8.84966470	-0.97348250		20.00000000	1.71700000	15.19487429	0.447073
21	-0.09985789	8.85165880	-0.88390796		21.00000000	1.63523810	14.47456968	0.468429
22	-0.08999569	8.85249810	-0.79668667		22.00000000	1.56090909	13.81794476	0.489801
23	-0.07986032	8.85764600	-0.70737446		23.00000000	1.49304348	13.22485059	0.511330
24	-0.07004426	8.84551720	-0.61957774		24.00000000	1.43083333	12.65646086	0.532717
25	-0.05992676	8.85170360	-0.53045391		25.00000000	1.37360000	12.15870006	0.554066
26	-0.04974376	8.85412500	-0.44043744		26.00000000	1.32076923	11.69425587	0.575444
27	-0.03992324	8.86578180	-0.35395070		27.00000000	1.27185185	11.27596100	0.596925
28	-0.02978489	8.85060020	-0.26361417		28.00000000	1.22642857	10.85462896	0.618313
29	-0.01994725	8.85527990	-0.17663849		29.00000000	1.18413793	10.48587282	0.639675
30	-0.00981486	8.84418580	-0.08680446		30.00000000	1.14466667	10.12364468	0.661052
31	-0.00063296	8.85092260	-0.00560232		31.00000000	1.10774194	9.80453813	0.682640
32	0.00952006	8.84632020	0.08421748		32.00000000	1.07312500	9.49320736	0.704028
33	0.01932913	8.84897990	0.17104312		33.00000000	1.04060606	9.20830211	0.725432
34	0.02947835	8.84833620	0.26083439		34.00000000	1.01000000	8.93681956	0.746826
35	0.03930678	8.84555440	0.34769028		35.00000000	0.98114286	8.67875252	0.768317
36	0.04944484	8.85991100	0.43807687		36.00000000	0.95388889	8.45137066	0.789688
37	0.05925838	8.85895440	0.52496728		37.00000000	0.92810811	8.22206741	0.811025
38	0.06939197	8.84924700	0.61406671		38.00000000	0.90368421	7.99692479	0.832401
39	0.07955013	8.85630130	0.70451988		39.00000000	0.88051282	7.79808684	0.853884
40	0.08939195	8.85784630	0.79182013		40.00000000	0.85850000	7.60446105	0.875277
41	0.09951214	8.84745120	0.88042878		41.00000000	0.83756098	7.41027986	0.896641
42	0.10933089	8.85347270	0.96795805		42.00000000	0.81761905	7.23876792	0.918003
43	0.11947118	8.84780220	1.05705737		43.00000000	0.79860465	7.06589599	0.939460
44	0.12932640	8.85387610	1.14503992		44.00000000	0.78045455	6.91004785	0.960830
45	0.13945478	8.85181240	1.23442755		45.00000000	0.76311111	6.75491640	0.982207
46	0.14926684	8.85544870	1.32182484		46.00000000	0.74652174	6.61078496	1.003565
47	0.15942946	8.84669400	1.41042365		47.00000000	0.73063830	6.46373345	1.025043
48	0.16957569	8.84836100	1.50046692		48.00000000	0.71541667	6.33026493	1.046420
49	0.17936914	8.86381440	1.58989477		49.00000000	0.70081633	6.21190585	1.067802
50	0.18953325	8.84869960	1.67712279		50.00000000	0.68680000	6.07728689	1.089274
51	0.19931255	8.85299680	1.76451337		51.00000000	0.67333333	5.96101785	1.110729
52	0.20947741	8.84622480	1.85308426		52.00000000	0.66038462	5.84191076	1.132087
53	0.21925746	8.85815050	1.94221558		53.00000000	0.64792453	5.73941298	1.153457
54	0.22944687	8.84180740	2.02872503		54.00000000	0.63592593	5.62273456	1.174932
55	0.23928125	8.86149310	2.12038915		55.00000000	0.62436364	5.53279406	1.196317
56	0.24941187	8.85366440	2.20820899		56.00000000	0.61321429	5.42919349	1.217661
57	0.25957149	8.85502620	2.29851234		57.00000000	0.60245614	5.33476491	1.239043
58	0.26940292	8.85228630	2.38483178		58.00000000	0.59206897	5.24116399	1.260517
59	0.27953872	8.84938050	2.47374450		59.00000000	0.58203390	5.15063943	1.281893
60	0.28934705	8.84889980	2.56040305		60.00000000	0.57233333	5.06452032	1.303252
61	0.29951563	8.85219100	2.65136956		61.00000000	0.56295082	4.98334818	1.324637
62	0.30935225	8.85128120	2.73816375		62.00000000	0.55387097	4.90246768	1.346111
63	0.31947988	8.84676270	2.82636269		63.00000000	0.54507937	4.82218780	1.367500
64	0.32927185	8.85191920	2.91468781		64.00000000	0.53656250	4.74960790	1.388849
65	0.33947688	8.84808540	3.00372043		65.00000000	0.52830769	4.67451158	1.410226
66	0.34924948	8.85510830	3.09264197		66.00000000	0.52030303	4.60733968	1.431713
67	0.35940391	8.84263230	3.17807662		67.00000000	0.51253731	4.53217900	1.453087
68	0.36955911	8.84735300	3.26961990		68.00000000	0.50500000	4.46791327	1.474444
69	0.37936521	8.85122490	3.35784679		69.00000000	0.49768116	4.40508787	1.495818
70	0.38954270	8.83218380	3.44051272		70.00000000	0.49057143	4.33281702	1.517300
71	0.39934656	8.85715580	3.53707470		71.00000000	0.48366197	4.28386944	1.538680
72	0.40952480	8.82990070	3.61606332		72.00000000	0.47694444	4.21137208	1.560032
73	0.41930336	8.82409480	3.69997260		73.00000000	0.47041096	4.15095090	1.581394
74	0.42947492	8.83789730	3.79565524		74.00000000	0.46405405	4.10126207	1.602859
75	0.43925720	8.82887270	3.87814590		75.00000000	0.45786667	4.04244651	1.624240
76	0.44943395	8.83415320	3.97036837		76.00000000	0.45184211	3.99164238	1.645616
77	0.45955566	8.81490520	4.05093958		77.00000000	0.44597403	3.93121876	1.666969
78	0.46942648	8.80912400	4.13523607		78.00000000	0.44025641	3.87827331	1.688440
79	0.47959208	8.80323120	4.22195996		79.00000000	0.43468354	3.82661974	1.709826
80	0.48939297	8.78870300	4.30112946		80.00000000	0.42925000	3.77255076	1.731226
81	0.49952209	8.74631020	4.36897515		81.00000000	0.42395062	3.70800361	1.752713
82	0.50936097	8.73188970	4.44768381		82.00000000	0.41878049	3.65674503	1.774116
83	0.51949233	8.66593360	4.50188604		83.00000000	0.41373494	3.58539952	1.795464
84	0.52927983	8.61972140	4.56224468		84.00000000	0.40880952	3.52382420	1.816843
85	0.53939402	8.50276950	4.58634302		85.00000000	0.40400000	3.43511888	1.838325
86	0.54954922	8.39415360	4.61300056		86.00000000	0.39930233	3.35180505	1.859700
87	0.55934566	8.20641140	4.59022060		87.00000000	0.39471264	3.23917434	1.881059
88	0.56949860	7.94499350	4.52466268		88.00000000	0.39022727	3.10035315	1.902440
89	0.57926226	7.61704780	4.41226832		89.00000000	0.38584270	2.93898226	1.923928
90	0.58940923	7.14911130	4.21375219		90.00000000	0.38155556	2.72778313	1.945302
91	0.59920120	6.56215760	3.93205271		91.00000000	0.37736264	2.47631310	1.966659
92	0.60933775	5.78181360	3.52307729		92.00000000	0.37326087	2.15812477	1.988138
93	0.61910594	4.84189990	2.99764899		93.00000000	0.36924731	1.78785852	2.009637
94	0.62923133	3.65174440	2.29779199		94.00000000	0.36531915	1.33405216	2.031076
95	0.63934404	2.21547750	1.41645234		95.00000000	0.36147368	0.80083681	2.052449
96	0.64907277	0.57124567	0.37078001		96.00000000	0.35770833	0.20433934	2.073836
97	0.65917581	-1.39790300	-0.92146384		97.00000000	0.35402062	-0.49488648	2.095327
98	0.66893506	-3.59524700	-2.40498677		98.00000000	0.35040816	-1.25980390	2.116710
99	0.67906862	-6.23557470	-4.23438311		99.00000000	0.34686869	-2.16292561	2.138075
100	0.68898785	-9.17051510	-6.31837348		100.00000000	0.34340000	-3.14915489	2.159448
101	0.69157654	-10.00028700	-6.91596388		101.00000000	0.34000000	-3.40009758	2.180920
