# Supplementary material for: Study on the Electrical Injection Regeneration of Industrialized B-Doped Czochralski Silicon PERC Solar Cells
Source: Hindawi journal article supplement (doi:10.1155/2019/5357370), 2019-06-20
Supplement: f1 [file 5357370.f1.zip › section3.2/IVRawData_1-5-9h.csv]

23:59 02/04/2018
Test Lot:	JK-PERC
Recipe:	Recipe_YJX-LID
Cell Name:	1-5-9h
Test Order:	2
Test Condition:	Light
1	-0.29979396	8.86708260	-2.65829781		1.00000000	34.34000000	304.49561648	0.000000
2	-0.29003161	8.86264990	-2.57044862		2.00000000	17.17000000	152.17169878	0.061724
3	-0.27988744	8.86114120	-2.48012213		3.00000000	11.44666667	101.43052960	0.083116
4	-0.27003953	8.87412450	-2.39636441		4.00000000	8.58500000	76.18435883	0.104655
5	-0.25987378	8.86164670	-2.30290962		5.00000000	6.86800000	60.86178954	0.126046
6	-0.24973480	8.86061760	-2.21280456		6.00000000	5.72333333	50.71226806	0.147440
7	-0.23990326	8.86885930	-2.12766826		7.00000000	4.90571429	43.50808977	0.168782
8	-0.22976057	8.86456390	-2.03672725		8.00000000	4.29250000	38.05114054	0.190263
9	-0.21993868	8.85845280	-1.94831642		9.00000000	3.81555556	33.79991879	0.211650
10	-0.20983918	8.85791870	-1.85873840		10.00000000	3.43400000	30.41809282	0.233031
11	-0.20001656	8.86251450	-1.77264966		11.00000000	3.12181818	27.66715890	0.254521
12	-0.18986717	8.85689930	-1.68163441		12.00000000	2.86166667	25.34549350	0.275914
13	-0.18009368	8.87248900	-1.59787919		13.00000000	2.64153846	23.43702094	0.297256
14	-0.16989294	8.85359670	-1.50416357		14.00000000	2.45285714	21.71660791	0.318616
15	-0.16008073	8.86571690	-1.41923043		15.00000000	2.28933333	20.29658122	0.340099
16	-0.14990084	8.86616420	-1.32904546		16.00000000	2.14625000	19.02900491	0.361471
17	-0.13975666	8.86637780	-1.23913535		17.00000000	2.02000000	17.91008316	0.382829
18	-0.12995413	8.85487170	-1.15072715		18.00000000	1.90777778	16.89312745	0.404211
19	-0.11979955	8.86720280	-1.06228691		19.00000000	1.80736842	16.02630232	0.425688
20	-0.10997171	8.85967920	-0.97431407		20.00000000	1.71700000	15.21206919	0.447080
21	-0.09982605	8.85259060	-0.88371918		21.00000000	1.63523810	14.47609339	0.468432
22	-0.09002427	8.85933880	-0.79755551		22.00000000	1.56090909	13.82862247	0.489806
23	-0.07983916	8.87229540	-0.70835664		23.00000000	1.49304348	13.24672278	0.511301
24	-0.07004631	8.84739690	-0.61972747		24.00000000	1.43083333	12.65915040	0.532676
25	-0.05993712	8.87192730	-0.53175780		25.00000000	1.37360000	12.18647934	0.554010
26	-0.04976839	8.85729980	-0.44081357		26.00000000	1.32076923	11.69844904	0.575429
27	-0.03993907	8.85623170	-0.35370961		27.00000000	1.27185185	11.26381469	0.596903
28	-0.02982542	8.87613870	-0.26473452		28.00000000	1.22642857	10.88595011	0.618272
29	-0.01993506	8.85095500	-0.17644429		29.00000000	1.18413793	10.48075154	0.639634
30	-0.00985490	8.86665530	-0.08737999		30.00000000	1.14466667	10.14936477	0.661004
31	-0.00067238	8.85202310	-0.00595189		31.00000000	1.10774194	9.80575720	0.682597
32	0.00947084	8.85385700	0.08385346		32.00000000	1.07312500	9.50129529	0.703979
33	0.01928872	8.86407180	0.17097662		33.00000000	1.04060606	9.22400684	0.725344
34	0.02944377	8.85851100	0.26082792		34.00000000	1.01000000	8.94709611	0.746709
35	0.03926909	8.85713480	0.34781162		35.00000000	0.98114286	8.69011454	0.768192
36	0.04938245	8.86692240	0.43787037		36.00000000	0.95388889	8.45805876	0.789574
37	0.05921968	8.84489350	0.52379180		37.00000000	0.92810811	8.20901737	0.810963
38	0.06936058	8.87915330	0.61586326		38.00000000	0.90368421	8.02395064	0.832309
39	0.07951265	8.84570310	0.70334528		39.00000000	0.88051282	7.78875499	0.853776
40	0.08932979	8.86377330	0.79179898		40.00000000	0.85850000	7.60954938	0.875168
41	0.09947515	8.85115810	0.88047031		41.00000000	0.83756098	7.41338461	0.896556
42	0.10928634	8.85847280	0.96811007		42.00000000	0.81761905	7.24285609	0.918028
43	0.11944585	8.85884000	1.05815167		43.00000000	0.79860465	7.07471083	0.939424
44	0.12926820	8.85163400	1.14423479		44.00000000	0.78045455	6.90829799	0.960767
45	0.13940091	8.86895280	1.23634009		45.00000000	0.76311111	6.76799643	0.982138
46	0.14927536	8.84872530	1.32089665		46.00000000	0.74652174	6.60576580	1.003611
47	0.15942518	8.86646180	1.41353727		47.00000000	0.73063830	6.47817656	1.024976
48	0.16955566	8.84230520	1.49926289		48.00000000	0.71541667	6.32593251	1.046329
49	0.17938620	8.88140390	1.59320130		49.00000000	0.70081633	6.22423286	1.067700
50	0.18952711	8.85302930	1.67788906		50.00000000	0.68680000	6.08026052	1.089178
51	0.19930926	8.85403060	1.76469029		51.00000000	0.67333333	5.96171394	1.110561
52	0.20944495	8.85120010	1.85383916		52.00000000	0.66038462	5.84519637	1.131919
53	0.21928516	8.86670680	1.94433722		53.00000000	0.64792453	5.74495682	1.153288
54	0.22940820	8.85543250	2.03150883		54.00000000	0.63592593	5.63139911	1.174764
55	0.23923576	8.86376480	2.12052951		55.00000000	0.62436364	5.53421242	1.196142
56	0.24940197	8.85440920	2.20830710		56.00000000	0.61321429	5.42965021	1.217484
57	0.25954288	8.84901240	2.29669816		57.00000000	0.60245614	5.33114186	1.238864
58	0.26936820	8.86678500	2.38842992		58.00000000	0.59206897	5.24974822	1.260345
59	0.27950463	8.84977530	2.47355317		59.00000000	0.58203390	5.15086922	1.281735
60	0.28934708	8.85811710	2.56307032		60.00000000	0.57233333	5.06979569	1.303082
61	0.29949245	8.85232640	2.65120492		61.00000000	0.56295082	4.98342440	1.324455
62	0.30927235	8.86077590	2.74039299		62.00000000	0.55387097	4.90772652	1.345929
63	0.31943709	8.85793690	2.82955359		63.00000000	0.54507937	4.82827862	1.367307
64	0.32926539	8.85162930	2.91453517		64.00000000	0.53656250	4.74945235	1.388674
65	0.33937800	8.86229610	3.00766833		65.00000000	0.52830769	4.68201920	1.410048
66	0.34921673	8.84609030	3.08920273		66.00000000	0.52030303	4.60264759	1.431528
67	0.35935315	8.84500890	3.17848181		67.00000000	0.51253731	4.53339710	1.452902
68	0.36952904	8.85681250	3.27284942		68.00000000	0.50500000	4.47269031	1.474291
69	0.37936777	8.84204480	3.35438682		69.00000000	0.49768116	4.40051911	1.495639
70	0.38950419	8.83390620	3.44084348		70.00000000	0.49057143	4.33366198	1.517105
71	0.39933100	8.86635300	3.54060961		71.00000000	0.48366197	4.28831777	1.538499
72	0.40942875	8.84109210	3.61979729		72.00000000	0.47694444	4.21670976	1.559885
73	0.41927046	8.83855530	3.70574515		73.00000000	0.47041096	4.15775327	1.581352
74	0.42944187	8.83451370	3.79391008		74.00000000	0.46405405	4.09969190	1.602729
75	0.43925527	8.84239200	3.88406729		75.00000000	0.45786667	4.04863655	1.624071
76	0.44939396	8.82447910	3.96566761		76.00000000	0.45184211	3.98727121	1.645454
77	0.45951846	8.81841280	4.05222347		77.00000000	0.44597403	3.93278306	1.666934
78	0.46938995	8.81056310	4.13558977		78.00000000	0.44025641	3.87890688	1.688304
79	0.47952935	8.79111960	4.21559987		79.00000000	0.43468354	3.82135503	1.709662
80	0.48937774	8.78520200	4.29928230		80.00000000	0.42925000	3.77104796	1.731034
81	0.49950004	8.74745460	4.36935392		81.00000000	0.42395062	3.70848878	1.752507
82	0.50931567	8.72049520	4.44148486		82.00000000	0.41878049	3.65197323	1.773880
83	0.51945955	8.66716580	4.50224205		83.00000000	0.41373494	3.58590932	1.795223
84	0.52920526	8.61059670	4.55677307		84.00000000	0.40880952	3.52009394	1.816593
85	0.53937817	8.50289440	4.58627562		85.00000000	0.40400000	3.43516934	1.838084
86	0.54951161	8.38952450	4.61014112		86.00000000	0.39930233	3.34995664	1.859462
87	0.55931985	8.18720340	4.57926538		87.00000000	0.39471264	3.23159270	1.880824
88	0.56945699	7.95031640	4.52736325		88.00000000	0.39022727	3.10243029	1.902199
89	0.57925850	7.59368370	4.39870583		89.00000000	0.38584270	2.92996740	1.923687
90	0.58938605	7.14009950	4.20827504		90.00000000	0.38155556	2.72434463	1.945073
91	0.59913838	6.54993150	3.92431535		91.00000000	0.37736264	2.47169943	1.966418
92	0.60928375	5.78819320	3.52665206		92.00000000	0.37326087	2.16050603	1.987896
93	0.61907113	4.83061460	2.99049404		93.00000000	0.36924731	1.78369146	2.009396
94	0.62921280	3.65642980	2.30067243		94.00000000	0.36531915	1.33576382	2.030770
95	0.63931423	2.22844030	1.42467359		95.00000000	0.36147368	0.80552253	2.052123
96	0.64902419	0.61117983	0.39667049		96.00000000	0.35770833	0.21862412	2.073497
97	0.65915692	-1.34886180	-0.88911159		97.00000000	0.35402062	-0.47752489	2.095009
98	0.66889220	-3.51047540	-2.34812961		98.00000000	0.35040816	-1.23009924	2.116391
99	0.67896760	-6.11302520	-4.15054605		99.00000000	0.34686869	-2.12041702	2.137786
100	0.68894398	-8.99493600	-6.19700701		100.00000000	0.34340000	-3.08886102	2.159124
101	0.69204843	-10.00043500	-6.92078534		101.00000000	0.34000000	-3.40014790	2.180612
23:59 02/04/2018
Test Lot:	JK-PERC
Recipe:	Recipe_YJX-LID
Cell Name:	1-5-9h
Test Order:	3
Test Condition:	Light
1	-0.29981843	8.84600350	-2.65219488		1.00000000	34.34000000	303.77176019	0.000000
2	-0.29003805	8.86400990	-2.57090015		2.00000000	17.17000000	152.19504998	0.061755
3	-0.27988032	8.85941220	-2.47957512		3.00000000	11.44666667	101.41073832	0.083291
4	-0.27007166	8.85247800	-2.39080343		4.00000000	8.58500000	75.99852363	0.104686
5	-0.25991169	8.87122540	-2.30573519		5.00000000	6.86800000	60.92757605	0.126036
6	-0.24974205	8.84741500	-2.20957156		6.00000000	5.72333333	50.63670518	0.147417
7	-0.23993638	8.87062450	-2.12838553		7.00000000	4.90571429	43.51674933	0.168904
8	-0.22979204	8.85882950	-2.03568850		8.00000000	4.29250000	38.02652563	0.190278
9	-0.21992980	8.86372280	-1.94939678		9.00000000	3.81555556	33.82002677	0.211632
10	-0.20981523	8.85738470	-1.85841421		10.00000000	3.43400000	30.41625906	0.233009
11	-0.19996192	8.85688590	-1.77103991		11.00000000	3.12181818	27.64958744	0.254478
12	-0.18984288	8.85993100	-1.68199482		12.00000000	2.86166667	25.35416921	0.275844
13	-0.18003498	8.86248300	-1.59555695		13.00000000	2.64153846	23.41058971	0.297215
14	-0.16988021	8.85928730	-1.50501759		14.00000000	2.45285714	21.73056613	0.318595
15	-0.16007082	8.85707950	-1.41775998		15.00000000	2.28933333	20.27680734	0.340075
16	-0.14995402	8.84676930	-1.32660862		16.00000000	2.14625000	18.98737861	0.361461
17	-0.13981861	8.87185480	-1.24045041		17.00000000	2.02000000	17.92114670	0.382817
18	-0.12999135	8.86683460	-1.15261180		18.00000000	1.90777778	16.91595001	0.404194
19	-0.11985446	8.84514900	-1.06013056		19.00000000	1.80736842	15.98644298	0.425675
20	-0.11000710	8.85988810	-0.97465060		20.00000000	1.71700000	15.21242787	0.447054
21	-0.09982480	8.85436060	-0.88388478		21.00000000	1.63523810	14.47898776	0.468395
22	-0.09004965	8.85638520	-0.79751436		22.00000000	1.56090909	13.82401217	0.489817
23	-0.07990009	8.85074420	-0.70717528		23.00000000	1.49304348	13.21454591	0.511307
24	-0.07006316	8.86360550	-0.62101220		24.00000000	1.43083333	12.68234220	0.532685
25	-0.05992701	8.85372640	-0.53057734		25.00000000	1.37360000	12.16147858	0.554068
26	-0.04976853	8.85337920	-0.44061963		26.00000000	1.32076923	11.69327084	0.575426
27	-0.03998369	8.86845020	-0.35459340		27.00000000	1.27185185	11.27935481	0.596913
28	-0.02981405	8.86186030	-0.26420793		28.00000000	1.22642857	10.86843867	0.618289
29	-0.01998977	8.85356620	-0.17698072		29.00000000	1.18413793	10.48384356	0.639666
30	-0.00982235	8.85985950	-0.08702467		30.00000000	1.14466667	10.14158584	0.661013
31	-0.00066275	8.85409550	-0.00586804		31.00000000	1.10774194	9.80805289	0.682580
32	0.00950074	8.85542200	0.08413302		32.00000000	1.07312500	9.50297473	0.703962
33	0.01934260	8.86298370	0.17143314		33.00000000	1.04060606	9.22287455	0.725345
34	0.02947028	8.85493950	0.26095751		34.00000000	1.01000000	8.94348890	0.746832
35	0.03927418	8.86157800	0.34803123		35.00000000	0.98114286	8.69447396	0.768209
36	0.04944726	8.85353950	0.43778328		36.00000000	0.95388889	8.44529296	0.789549
37	0.05921618	8.85291390	0.52423577		37.00000000	0.92810811	8.21646117	0.810938
38	0.06942499	8.85963730	0.61508020		38.00000000	0.90368421	8.00631434	0.832422
39	0.07953331	8.85881810	0.70457112		39.00000000	0.88051282	7.80030291	0.853808
40	0.08933275	8.85788150	0.79129893		40.00000000	0.85850000	7.60449127	0.875158
41	0.09950285	8.86403470	0.88199675		41.00000000	0.83756098	7.42416955	0.896534
42	0.10935663	8.85367300	0.96820784		42.00000000	0.81761905	7.23893169	0.918019
43	0.11948579	8.85903640	1.05852896		43.00000000	0.79860465	7.07486767	0.939398
44	0.12926587	8.85436730	1.14456749		44.00000000	0.78045455	6.91043121	0.960738
45	0.13948511	8.86244110	1.23617857		45.00000000	0.76311111	6.76302727	0.982125
46	0.14926593	8.85564040	1.32184540		46.00000000	0.74652174	6.61092807	1.003605
47	0.15941669	8.85767460	1.41206117		47.00000000	0.73063830	6.47175629	1.024979
48	0.16958828	8.84854320	1.50060922		48.00000000	0.71541667	6.33039528	1.046343
49	0.17935795	8.86105060	1.58929987		49.00000000	0.70081633	6.20996893	1.067722
50	0.18955186	8.85275550	1.67805627		50.00000000	0.68680000	6.08007248	1.089200
51	0.19930516	8.84958270	1.76376750		51.00000000	0.67333333	5.95871902	1.110593
52	0.20941868	8.86206720	1.85588242		52.00000000	0.66038462	5.85237284	1.131952
53	0.21928735	8.84749510	1.94014375		53.00000000	0.64792453	5.73250909	1.153333
54	0.22943363	8.85603620	2.03187253		54.00000000	0.63592593	5.63178302	1.174805
55	0.23924126	8.85881140	2.11939320		55.00000000	0.62436364	5.53111970	1.196182
56	0.24939275	8.86607270	2.21113425		56.00000000	0.61321429	5.43680244	1.217548
57	0.25950405	8.85416890	2.29769269		57.00000000	0.60245614	5.33424842	1.238916
58	0.26935709	8.84292410	2.38190430		58.00000000	0.59206897	5.23562092	1.260399
59	0.27951229	8.84929750	2.47348741		59.00000000	0.58203390	5.15059112	1.281777
60	0.28927898	8.86153510	2.56345583		60.00000000	0.57233333	5.07175192	1.303162
61	0.29945207	8.85788820	2.65251296		61.00000000	0.56295082	4.98655542	1.324504
62	0.30928278	8.83637430	2.73293841		62.00000000	0.55387097	4.89421118	1.345969
63	0.31946701	8.87059310	2.83386185		63.00000000	0.54507937	4.83517725	1.367344
64	0.32928729	8.84656430	2.91306118		64.00000000	0.53656250	4.74673466	1.388722
65	0.33943880	8.84844970	3.00350715		65.00000000	0.52830769	4.67470404	1.410221
66	0.34926057	8.85762310	3.09361849		66.00000000	0.52030303	4.60864814	1.431587
67	0.35937557	8.83402440	3.17473255		67.00000000	0.51253731	4.52776713	1.452943
68	0.36955684	8.85447220	3.27223077		68.00000000	0.50500000	4.47150846	1.474321
69	0.37940168	8.84336850	3.35518887		69.00000000	0.49768116	4.40117789	1.495795
70	0.38953829	8.84987830	3.44736646		70.00000000	0.49057143	4.34149744	1.517187
71	0.39935783	8.83893780	3.52989902		71.00000000	0.48366197	4.27505809	1.538535
72	0.40949517	8.84630010	3.62251716		72.00000000	0.47694444	4.21919369	1.559907
73	0.41931620	8.84461020	3.70868834		73.00000000	0.47041096	4.16060157	1.581397
74	0.42944685	8.83483220	3.79409086		74.00000000	0.46405405	4.09983970	1.602785
75	0.43926120	8.83512310	3.88092678		75.00000000	0.45786667	4.04530836	1.624132
76	0.44942012	8.83125590	3.96894409		76.00000000	0.45184211	3.99033326	1.645512
77	0.45956939	8.81945610	4.05315206		77.00000000	0.44597403	3.93324834	1.666984
78	0.46943879	8.81254860	4.13695215		78.00000000	0.44025641	3.87978101	1.688361
79	0.47958359	8.79256820	4.21677142		79.00000000	0.43468354	3.82198471	1.709727
80	0.48937187	8.78365230	4.29847235		80.00000000	0.42925000	3.77038275	1.731111
81	0.49951887	8.74916270	4.37037187		81.00000000	0.42395062	3.70921293	1.752577
82	0.50930941	8.71679310	4.43954475		82.00000000	0.41878049	3.65042287	1.773947
83	0.51945049	8.66695120	4.50205205		83.00000000	0.41373494	3.58582053	1.795286
84	0.52923876	8.60596660	4.55461109		84.00000000	0.40880952	3.51820111	1.816664
85	0.53935528	8.50330830	4.58630423		85.00000000	0.40400000	3.43533655	1.838148
86	0.54950523	8.37912460	4.60437279		86.00000000	0.39930233	3.34580394	1.859536
87	0.55933374	8.17812920	4.57430359		87.00000000	0.39471264	3.22801100	1.880909
88	0.56944203	7.94386240	4.52356913		88.00000000	0.39022727	3.09991176	1.902273
89	0.57926160	7.59301040	4.39833935		89.00000000	0.38584270	2.92970761	1.923781
90	0.58935648	7.12927100	4.20168206		90.00000000	0.38155556	2.72021296	1.945182
91	0.59914553	6.54317090	3.92031160		91.00000000	0.37736264	2.46914823	1.966564
92	0.60928583	5.76351500	3.51162802		92.00000000	0.37326087	2.15129462	1.988026
93	0.61910242	4.82898620	2.98963704		93.00000000	0.36924731	1.78309017	2.009532
94	0.62921667	3.63659240	2.28820456		94.00000000	0.36531915	1.32851684	2.030909
95	0.63933545	2.21468780	1.41592842		95.00000000	0.36147368	0.80055136	2.052294
96	0.64905006	0.60032666	0.38964205		96.00000000	0.35770833	0.21474185	2.073810
97	0.65916210	-1.33799590	-0.88195619		97.00000000	0.35402062	-0.47367814	2.095191
98	0.66894513	-3.49886610	-2.34054944		98.00000000	0.35040816	-1.22603124	2.116560
99	0.67902893	-6.07876590	-4.12765790		99.00000000	0.34686869	-2.10853355	2.137937
100	0.68898243	-8.94041920	-6.15979175		100.00000000	0.34340000	-3.07013995	2.159414
101	0.69233400	-10.00035500	-6.92358578		101.00000000	0.34000000	-3.40012070	2.180795
23:59 02/04/2018
Test Lot:	JK-PERC
Recipe:	Recipe_YJX-LID
Cell Name:	1-5-9h
Test Order:	4
Test Condition:	Light
1	-0.29981014	8.84103970	-2.65063335		1.00000000	34.34000000	303.60130330	0.000000
2	-0.28999627	8.85561850	-2.56809633		2.00000000	17.17000000	152.05096965	0.061791
3	-0.27986529	8.86907010	-2.48214488		3.00000000	11.44666667	101.52128908	0.083212
4	-0.27005884	8.85507580	-2.39139150		4.00000000	8.58500000	76.02082574	0.104723
5	-0.25992194	8.86761860	-2.30488863		5.00000000	6.86800000	60.90280454	0.126098
6	-0.24976417	8.85401250	-2.21141508		6.00000000	5.72333333	50.67446488	0.147445
7	-0.23994583	8.86362840	-2.12679067		7.00000000	4.90571429	43.48242847	0.168830
8	-0.22979477	8.86270240	-2.03660266		8.00000000	4.29250000	38.04315005	0.190337
9	-0.21997716	8.86766530	-1.95068383		9.00000000	3.81555556	33.83506960	0.211731
10	-0.20981568	8.85238930	-1.85737008		10.00000000	3.43400000	30.39910486	0.233082
11	-0.19999212	8.85006620	-1.76994350		11.00000000	3.12181818	27.62829757	0.254455
12	-0.18986860	8.86652850	-1.68347535		12.00000000	2.86166667	25.37304906	0.275934
13	-0.18008450	8.84916970	-1.59359830		13.00000000	2.64153846	23.37542212	0.297315
14	-0.16997139	8.85815620	-1.50563312		14.00000000	2.45285714	21.72779171	0.318663
15	-0.16009574	8.85013580	-1.41686904		15.00000000	2.28933333	20.26091089	0.340041
16	-0.14995807	8.86454960	-1.32931075		16.00000000	2.14625000	19.02553958	0.361530
17	-0.13980478	8.85260960	-1.23763714		17.00000000	2.02000000	17.88227139	0.382900
18	-0.12999015	8.85989670	-1.15169930		18.00000000	1.90777778	16.90271404	0.404295
19	-0.11985175	8.85724830	-1.06155671		19.00000000	1.80736842	16.00831087	0.425690
20	-0.11003637	8.84281350	-0.97303110		20.00000000	1.71700000	15.18311078	0.447168
21	-0.09987117	8.86707970	-0.88556559		21.00000000	1.63523810	14.49978652	0.468579
22	-0.09002900	8.85821150	-0.79749593		22.00000000	1.56090909	13.82686286	0.489960
23	-0.07986008	8.85422610	-0.70709917		23.00000000	1.49304348	13.21974453	0.511348
24	-0.07007597	8.85197350	-0.62031059		24.00000000	1.43083333	12.66569875	0.532830
25	-0.05990854	8.85566520	-0.53052993		25.00000000	1.37360000	12.16414172	0.554201
26	-0.04974408	8.86454300	-0.44095851		26.00000000	1.32076923	11.70801564	0.575596
27	-0.03992647	8.85696980	-0.35362757		27.00000000	1.27185185	11.26475344	0.597074
28	-0.02975978	8.86038590	-0.26368314		28.00000000	1.22642857	10.86663042	0.618464
29	-0.01993622	8.85398960	-0.17651511		29.00000000	1.18413793	10.48434493	0.639829
30	-0.00981866	8.85055160	-0.08690053		30.00000000	1.14466667	10.13093140	0.661209
31	-0.00063373	8.85230540	-0.00560994		31.00000000	1.10774194	9.80606992	0.682805
32	0.00948735	8.86484150	0.08410388		32.00000000	1.07312500	9.51308303	0.704194
33	0.01930393	8.86472990	0.17112415		33.00000000	1.04060606	9.22469166	0.725553
34	0.02941823	8.84570410	0.26022499		34.00000000	1.01000000	8.93416114	0.746923
35	0.03928394	8.87471580	0.34863379		35.00000000	0.98114286	8.70736402	0.768413
36	0.04944587	8.84586430	0.43739147		36.00000000	0.95388889	8.43797167	0.789794
37	0.05921705	8.85233590	0.52420923		37.00000000	0.92810811	8.21592472	0.811145
38	0.06938940	8.86556720	0.61517642		38.00000000	0.90368421	8.01167310	0.832530
39	0.07951636	8.86183930	0.70466120		39.00000000	0.88051282	7.80296312	0.854021
40	0.08931954	8.85952470	0.79132869		40.00000000	0.85850000	7.60590195	0.875420
41	0.09948892	8.83950900	0.87943321		41.00000000	0.83756098	7.40362778	0.896773
42	0.10930327	8.85717870	0.96811859		42.00000000	0.81761905	7.24179801	0.918149
43	0.11946520	8.85504720	1.05786998		43.00000000	0.79860465	7.07168188	0.939625
44	0.12926838	8.86498170	1.14596182		44.00000000	0.78045455	6.91871526	0.960990
45	0.13941394	8.85130410	1.23399518		45.00000000	0.76311111	6.75452851	0.982348
46	0.14925285	8.85117910	1.32106371		46.00000000	0.74652174	6.60759762	1.003736
47	0.15942000	8.85334010	1.41139948		47.00000000	0.73063830	6.46858934	1.025209
48	0.16957226	8.85984990	1.50238477		48.00000000	0.71541667	6.33848428	1.046582
49	0.17937097	8.84895990	1.58724652		49.00000000	0.70081633	6.20149557	1.067951
50	0.18954556	8.85978980	1.67933382		50.00000000	0.68680000	6.08490363	1.089322
51	0.19929144	8.85661600	1.76504776		51.00000000	0.67333333	5.96345477	1.110831
52	0.20942509	8.86452960	1.85645491		52.00000000	0.66038462	5.85399897	1.132210
53	0.21927889	8.84819510	1.94022240		53.00000000	0.64792453	5.73296264	1.153600
54	0.22941700	8.85077380	2.03051797		54.00000000	0.63592593	5.62843652	1.174959
55	0.23926634	8.85250760	2.11810709		55.00000000	0.62436364	5.52718384	1.196434
56	0.24939775	8.84840870	2.20677322		56.00000000	0.61321429	5.42597062	1.217801
57	0.25954330	8.85875030	2.29922929		57.00000000	0.60245614	5.33700851	1.239190
58	0.26937553	8.85305310	2.38479587		58.00000000	0.59206897	5.24161799	1.260663
59	0.27951512	8.85664460	2.47556608		59.00000000	0.58203390	5.15486738	1.282110
60	0.28934437	8.84968570	2.56060673		60.00000000	0.57233333	5.06497012	1.303488
61	0.29947653	8.84842590	2.64989588		61.00000000	0.56295082	4.98122861	1.324872
62	0.30931321	8.85860060	2.74008219		62.00000000	0.55387097	4.90652169	1.346219
63	0.31943792	8.84798810	2.82638291		63.00000000	0.54507937	4.82285574	1.367756
64	0.32929245	8.87110610	2.92118826		64.00000000	0.53656250	4.75990287	1.389125
65	0.33941272	8.83386040	2.99832459		65.00000000	0.52830769	4.66699640	1.410528
66	0.34921664	8.84868910	3.09010948		66.00000000	0.52030303	4.60399975	1.431907
67	0.35939270	8.85226060	3.18143784		67.00000000	0.51253731	4.53711387	1.453385
68	0.36956060	8.84788130	3.26982832		68.00000000	0.50500000	4.46818006	1.474777
69	0.37937421	8.84645650	3.35611745		69.00000000	0.49768116	4.40271473	1.496161
70	0.38946915	8.84892650	3.44638388		70.00000000	0.49057143	4.34103051	1.517495
71	0.39932072	8.84620950	3.53247475		71.00000000	0.48366197	4.27857513	1.538964
72	0.40948862	8.83489510	3.61778900		72.00000000	0.47694444	4.21375414	1.560337
73	0.41929999	8.85484220	3.71283525		73.00000000	0.47041096	4.16541481	1.581726
74	0.42944255	8.83601670	3.79456154		74.00000000	0.46405405	4.10038937	1.603220
75	0.43926063	8.82750420	3.87757506		75.00000000	0.45786667	4.04181992	1.624601
76	0.44940025	8.84154510	3.97339258		76.00000000	0.45184211	3.99498235	1.645944
77	0.45955697	8.81770320	4.05223696		77.00000000	0.44597403	3.93246660	1.667328
78	0.46940184	8.79818150	4.12988258		78.00000000	0.44025641	3.87345580	1.688815
79	0.47955185	8.79738900	4.21880417		79.00000000	0.43468354	3.82408023	1.710187
80	0.48936918	8.77098660	4.29225052		80.00000000	0.42925000	3.76494600	1.731547
81	0.49952665	8.75818350	4.37494606		81.00000000	0.42395062	3.71303730	1.752919
82	0.50929707	8.70662980	4.43426105		82.00000000	0.41878049	3.64616667	1.774394
83	0.51946050	8.68434140	4.51117233		83.00000000	0.41373494	3.59301547	1.795774
84	0.52924728	8.60501960	4.55418322		84.00000000	0.40880952	3.51781397	1.817115
85	0.53936982	8.50904080	4.58951980		85.00000000	0.40400000	3.43765248	1.838491
86	0.54953843	8.37250800	4.60101490		86.00000000	0.39930233	3.34316192	1.859974
87	0.55936915	8.18367200	4.57769365		87.00000000	0.39471264	3.23019881	1.881345
88	0.56945890	7.93314360	4.51759923		88.00000000	0.39022727	3.09572899	1.902712
89	0.57927322	7.58859540	4.39587009		89.00000000	0.38584270	2.92800411	1.924086
90	0.58939272	7.11955210	4.19621218		90.00000000	0.38155556	2.71650466	1.945567
91	0.59919447	6.52158450	3.90769737		91.00000000	0.37736264	2.46100233	1.966977
92	0.60928863	5.75952150	3.50921096		92.00000000	0.37326087	2.14980400	1.988443
93	0.61910820	4.81795170	2.98283340		93.00000000	0.36924731	1.77901571	2.009845
94	0.62922025	3.62023850	2.27792737		94.00000000	0.36531915	1.32254245	2.031336
95	0.63934052	2.20238350	1.40807301		95.00000000	0.36147368	0.79610368	2.052706
96	0.64903730	0.59800458	0.38812728		96.00000000	0.35770833	0.21391122	2.074075
97	0.65916348	-1.35531900	-0.89337679		97.00000000	0.35402062	-0.47981087	2.095441
98	0.66894060	-3.49367500	-2.33706105		98.00000000	0.35040816	-1.22421224	2.116918
99	0.67902887	-6.07373140	-4.12423897		99.00000000	0.34686869	-2.10678724	2.138304
100	0.68897569	-8.92759990	-6.15089930		100.00000000	0.34340000	-3.06573781	2.159694
101	0.69234514	-10.00056900	-6.92384534		101.00000000	0.34000000	-3.40019346	2.181103
