# Supplementary material for: Study on the Electrical Injection Regeneration of Industrialized B-Doped Czochralski Silicon PERC Solar Cells
Source: Hindawi journal article supplement (doi:10.1155/2019/5357370), 2019-06-20
Supplement: f1 [file 5357370.f1.zip › section3.2/IVRawData_1-5-10min.csv]

12:26 02/04/2018
Test Lot:	JK-PERC
Recipe:	Recipe_YJX-LID
Cell Name:	1-5-10min
Test Order:	2
Test Condition:	Light
1	-0.29986426	8.87670140	-2.66180550		1.00000000	34.34000000	304.82592608	0.000000
2	-0.29006553	8.87954520	-2.57564998		2.00000000	17.17000000	152.46179108	0.061794
3	-0.27992663	8.87534240	-2.48444469		3.00000000	11.44666667	101.59308601	0.083269
4	-0.27011225	8.88082120	-2.39881860		4.00000000	8.58500000	76.24185000	0.104755
5	-0.25996292	8.88211820	-2.30902138		5.00000000	6.86800000	61.00238780	0.126138
6	-0.24977341	8.87226200	-2.21605513		6.00000000	5.72333333	50.77891285	0.147478
7	-0.23997244	8.87414930	-2.12955126		7.00000000	4.90571429	43.53404099	0.168857
8	-0.22982387	8.87119580	-2.03881255		8.00000000	4.29250000	38.07960797	0.190354
9	-0.21997525	8.87660790	-1.95263404		9.00000000	3.81555556	33.86919059	0.211727
10	-0.20986092	8.88024710	-1.86361683		10.00000000	3.43400000	30.49476854	0.233102
11	-0.20003091	8.89512350	-1.77929965		11.00000000	3.12181818	27.76895827	0.254470
12	-0.18988681	8.87130070	-1.68454299		12.00000000	2.86166667	25.38670550	0.275952
13	-0.18010518	8.88643070	-1.60049220		13.00000000	2.64153846	23.47384848	0.297347
14	-0.16996852	8.87389950	-1.50828356		14.00000000	2.45285714	21.76640777	0.318732
15	-0.16014223	8.89272210	-1.42410035		15.00000000	2.28933333	20.35840513	0.340068
16	-0.14997432	8.87681290	-1.33129398		16.00000000	2.14625000	19.05185969	0.361553
17	-0.13984732	8.87706180	-1.24143330		17.00000000	2.02000000	17.93166484	0.382928
18	-0.13003220	8.87886240	-1.15453801		18.00000000	1.90777778	16.93889638	0.404325
19	-0.11986056	8.88336660	-1.06476530		19.00000000	1.80736842	16.05551627	0.425814
20	-0.11006479	8.88200000	-0.97759546		20.00000000	1.71700000	15.25039400	0.447184
21	-0.09988868	8.88160900	-0.88717222		21.00000000	1.63523810	14.52354538	0.468545
22	-0.09004602	8.87479500	-0.79913995		22.00000000	1.56090909	13.85274820	0.489918
23	-0.07990564	8.88140200	-0.70967408		23.00000000	1.49304348	13.26031933	0.511393
24	-0.07010465	8.87973690	-0.62251086		24.00000000	1.43083333	12.70542355	0.532780
25	-0.05993599	8.87266060	-0.53179167		25.00000000	1.37360000	12.18748660	0.554125
26	-0.04980603	8.87602710	-0.44207963		26.00000000	1.32076923	11.72318349	0.575504
27	-0.03997229	8.87406440	-0.35471671		27.00000000	1.27185185	11.28649524	0.596981
28	-0.02985127	8.87156110	-0.26482732		28.00000000	1.22642857	10.88033601	0.618372
29	-0.01999446	8.87828640	-0.17751656		29.00000000	1.18413793	10.51311569	0.639709
30	-0.00986896	8.87670140	-0.08760385		30.00000000	1.14466667	10.16086420	0.661093
31	-0.00063886	8.84003830	-0.00564759		31.00000000	1.10774194	9.79248114	0.682683
32	0.00949089	8.90031910	0.08447195		32.00000000	1.07312500	9.55115493	0.704077
33	0.01931169	8.87544630	0.17139984		33.00000000	1.04060606	9.23584321	0.725426
34	0.02943392	8.87462140	0.26121487		34.00000000	1.01000000	8.96336761	0.746809
35	0.03929491	8.87479210	0.34873412		35.00000000	0.98114286	8.70743888	0.768279
36	0.04941342	8.87959190	0.43877098		36.00000000	0.95388889	8.47014405	0.789662
37	0.05924314	8.87063790	0.52552447		37.00000000	0.92810811	8.23291096	0.811004
38	0.06939068	8.87497900	0.61584080		38.00000000	0.90368421	8.02017839	0.832394
39	0.07953673	8.87936120	0.70623535		39.00000000	0.88051282	7.81839137	0.853876
40	0.08936422	8.86265950	0.79200468		40.00000000	0.85850000	7.60859318	0.875251
41	0.09950209	8.88532920	0.88410880		41.00000000	0.83756098	7.44200499	0.896615
42	0.10932288	8.87551590	0.97029696		42.00000000	0.81761905	7.25679086	0.917984
43	0.11947042	8.85985090	1.05849011		43.00000000	0.79860465	7.07551814	0.939462
44	0.12929419	8.87881090	1.14797866		44.00000000	0.78045455	6.92950833	0.960846
45	0.13944322	8.87462520	1.23750631		45.00000000	0.76311111	6.77232510	0.982226
46	0.14925806	8.87405590	1.32452437		46.00000000	0.74652174	6.62467564	1.003584
47	0.15941527	8.87808610	1.41530249		47.00000000	0.73063830	6.48666972	1.025058
48	0.16955611	8.87850380	1.50540457		48.00000000	0.71541667	6.35182959	1.046436
49	0.17935681	8.87143230	1.59115180		49.00000000	0.70081633	6.21724460	1.067831
50	0.18957059	8.87439350	1.68232401		50.00000000	0.68680000	6.09493346	1.089307
51	0.19931918	8.87435820	1.76882980		51.00000000	0.67333333	5.97540119	1.110687
52	0.20950246	8.88698100	1.86184438		52.00000000	0.66038462	5.86882553	1.132038
53	0.21930315	8.86674980	1.94450616		53.00000000	0.64792453	5.74498468	1.153418
54	0.22943357	8.88597300	2.03874051		54.00000000	0.63592593	5.65082061	1.174904
55	0.23926106	8.86869240	2.12193274		55.00000000	0.62436364	5.53728904	1.196300
56	0.24940935	8.87847330	2.21437425		56.00000000	0.61321429	5.44440666	1.217643
57	0.25955465	8.87890910	2.30456214		57.00000000	0.60245614	5.34915331	1.239017
58	0.26938513	8.86957650	2.38933202		58.00000000	0.59206897	5.25140098	1.260506
59	0.27953935	8.88622000	2.48404816		59.00000000	0.58203390	5.17208127	1.281873
60	0.28936610	8.87765220	2.56889159		60.00000000	0.57233333	5.08097628	1.303235
61	0.29950622	8.86878110	2.65625510		61.00000000	0.56295082	4.99268759	1.324608
62	0.30930468	8.87842370	2.74613800		62.00000000	0.55387097	4.91750113	1.346093
63	0.31947604	8.86948970	2.83358945		63.00000000	0.54507937	4.83457581	1.367485
64	0.32928118	8.87739850	2.92316025		64.00000000	0.53656250	4.76327913	1.388829
65	0.33937216	8.87078480	3.01049740		65.00000000	0.52830769	4.68650385	1.410208
66	0.34925994	8.87421610	3.09940818		66.00000000	0.52030303	4.61728153	1.431686
67	0.35937846	8.87918280	3.19098704		67.00000000	0.51253731	4.55091250	1.453062
68	0.36956173	8.87207980	3.27878116		68.00000000	0.50500000	4.48040030	1.474409
69	0.37932968	8.87939450	3.36821787		69.00000000	0.49768116	4.41910735	1.495790
70	0.38950178	8.87406920	3.45646575		70.00000000	0.49057143	4.35336480	1.517279
71	0.39934191	8.86944480	3.54194103		71.00000000	0.48366197	4.28981316	1.538661
72	0.40947753	8.86631110	3.63055517		72.00000000	0.47694444	4.22873782	1.560033
73	0.41927156	8.87004380	3.71895710		73.00000000	0.47041096	4.17256581	1.581411
74	0.42945480	8.86502550	3.80712775		74.00000000	0.46405405	4.11385102	1.602875
75	0.43926668	8.85779670	3.89093495		75.00000000	0.45786667	4.05568985	1.624250
76	0.44942611	8.85312370	3.97882495		76.00000000	0.45184211	4.00021405	1.645622
77	0.45955431	8.84634110	4.06537418		77.00000000	0.44597403	3.94523836	1.666994
78	0.46943018	8.85215760	4.15546994		78.00000000	0.44025641	3.89721913	1.688480
79	0.47956803	8.84080890	4.23976931		79.00000000	0.43468354	3.84295415	1.709850
80	0.48941118	8.82438760	4.31875395		80.00000000	0.42925000	3.78786838	1.731242
81	0.49951702	8.79904750	4.39527399		81.00000000	0.42395062	3.73036162	1.752719
82	0.50934821	8.78888230	4.47660147		82.00000000	0.41878049	3.68061242	1.774089
83	0.51946300	8.73057460	4.53521047		83.00000000	0.41373494	3.61214376	1.795456
84	0.52927864	8.67221930	4.59002044		84.00000000	0.40880952	3.54528584	1.816843
85	0.53940976	8.57638360	4.62618502		85.00000000	0.40400000	3.46485897	1.838325
86	0.54954988	8.46868230	4.65396334		86.00000000	0.39930233	3.38156454	1.859715
87	0.55935800	8.30346010	4.64460683		87.00000000	0.39471264	3.27748069	1.881070
88	0.56949067	8.05084900	4.58488339		88.00000000	0.39022727	3.14166085	1.902452
89	0.57930475	7.71761990	4.47085387		89.00000000	0.38584270	2.97778727	1.923934
90	0.58940613	7.27441980	4.28758762		90.00000000	0.38155556	2.77559529	1.945317
91	0.59921354	6.69666910	4.01273480		91.00000000	0.37736264	2.52707271	1.966677
92	0.60929412	5.93998770	3.61919958		92.00000000	0.37326087	2.21716497	1.988161
93	0.61910897	5.01384210	3.10411462		93.00000000	0.36924731	1.85134772	2.009667
94	0.62922299	3.84474640	2.41920283		94.00000000	0.36531915	1.40455948	2.031049
95	0.63934296	2.44204000	1.56130108		95.00000000	0.36147368	0.88273320	2.052412
96	0.64915186	0.83325785	0.54091088		96.00000000	0.35770833	0.29806328	2.073847
97	0.65916026	-1.09740020	-0.72336260		97.00000000	0.35402062	-0.38850230	2.095351
98	0.66890955	-3.25187920	-2.17521305		98.00000000	0.35040816	-1.13948502	2.116728
99	0.67903477	-5.83902980	-3.96490426		99.00000000	0.34686869	-2.02537660	2.138071
100	0.68893224	-8.73737910	-6.01946216		100.00000000	0.34340000	-3.00041598	2.159450
101	0.69282854	-10.00027000	-6.92847246		101.00000000	0.34000000	-3.40009180	2.180931
12:26 02/04/2018
Test Lot:	JK-PERC
Recipe:	Recipe_YJX-LID
Cell Name:	1-5-10min
Test Order:	3
Test Condition:	Light
1	-0.29989702	8.86713890	-2.65922853		1.00000000	34.34000000	304.49754983	0.000000
2	-0.29003203	8.88676450	-2.57744635		2.00000000	17.17000000	152.58574647	0.021601
3	-0.27987155	8.88335130	-2.48619730		3.00000000	11.44666667	101.68476121	0.042993
4	-0.27010331	8.86773780	-2.39520533		4.00000000	8.58500000	76.12952901	0.064355
5	-0.25994954	8.88893700	-2.31067508		5.00000000	6.86800000	61.04921932	0.085745
6	-0.24981956	8.86949350	-2.21577296		6.00000000	5.72333333	50.76306780	0.107239
7	-0.23996574	8.88554950	-2.13222746		7.00000000	4.90571429	43.58996712	0.128631
8	-0.22981048	8.86735250	-2.03781053		8.00000000	4.29250000	38.06311061	0.149994
9	-0.21997079	8.87744050	-1.95277760		9.00000000	3.81555556	33.87236742	0.171420
10	-0.20984603	8.88124180	-1.86369333		10.00000000	3.43400000	30.49818434	0.192917
11	-0.20002867	8.85340400	-1.77093463		11.00000000	3.12181818	27.63871758	0.214298
12	-0.18988010	8.88714980	-1.68749289		12.00000000	2.86166667	25.43206034	0.235640
13	-0.18008880	8.87562940	-1.59840145		13.00000000	2.64153846	23.44531643	0.257056
14	-0.16995959	8.87351230	-1.50813851		14.00000000	2.45285714	21.76545803	0.278550
15	-0.16017200	8.86864570	-1.42050872		15.00000000	2.28933333	20.30328622	0.299931
16	-0.15003386	8.88846300	-1.33357041		16.00000000	2.14625000	19.07686371	0.321326
17	-0.13985403	8.87267110	-1.24087881		17.00000000	2.02000000	17.92279562	0.342676
18	-0.13002700	8.87385270	-1.15384045		18.00000000	1.90777778	16.92933898	0.364155
19	-0.11989703	8.87008090	-1.06349636		19.00000000	1.80736842	16.03150411	0.385542
20	-0.11004990	8.86155990	-0.97521378		20.00000000	1.71700000	15.21529835	0.406932
21	-0.09990878	8.88636210	-0.88782557		21.00000000	1.63523810	14.53131783	0.428355
22	-0.09011896	8.87733550	-0.80001624		22.00000000	1.56090909	13.85671369	0.449827
23	-0.07996369	8.87784580	-0.70990533		23.00000000	1.49304348	13.25500977	0.471192
24	-0.07012550	8.87559320	-0.62240539		24.00000000	1.43083333	12.69949460	0.492572
25	-0.05997544	8.87881370	-0.53251074		25.00000000	1.37360000	12.19593850	0.513950
26	-0.04982835	8.87915800	-0.44243383		26.00000000	1.32076923	11.72731868	0.535440
27	-0.04000728	8.87248710	-0.35496406		27.00000000	1.27185185	11.28448915	0.556847
28	-0.02987434	8.87399960	-0.26510486		28.00000000	1.22642857	10.88332665	0.578213
29	-0.02007187	8.87531950	-0.17814426		29.00000000	1.18413793	10.50960247	0.599580
30	-0.00990990	8.87300780	-0.08793064		30.00000000	1.14466667	10.15663626	0.621059
31	-0.00064035	8.86698150	-0.00567800		31.00000000	1.10774194	9.82232725	0.642560
32	0.00951843	8.87655450	0.08449085		32.00000000	1.07312500	9.52565255	0.663959
33	0.01929680	8.86503890	0.17106689		33.00000000	1.04060606	9.22501321	0.685315
34	0.02945699	8.88738350	0.26179557		34.00000000	1.01000000	8.97625734	0.706798
35	0.03928300	8.86815360	0.34836764		35.00000000	0.98114286	8.70092556	0.728189
36	0.04946105	8.87129590	0.43878359		36.00000000	0.95388889	8.46223059	0.749580
37	0.05928185	8.88065810	0.52646180		37.00000000	0.92810811	8.24221079	0.771072
38	0.06939812	8.87460520	0.61588092		38.00000000	0.90368421	8.01984059	0.792469
39	0.07952557	8.87741370	0.70598137		39.00000000	0.88051282	7.81667658	0.813829
40	0.08936646	8.87560460	0.79318135		40.00000000	0.85850000	7.61970655	0.835209
41	0.09951474	8.87117580	0.88281274		41.00000000	0.83756098	7.43015066	0.856704
42	0.10935861	8.88370700	0.97150985		42.00000000	0.81761905	7.26348806	0.878092
43	0.11946744	8.87064170	1.05975286		43.00000000	0.79860465	7.08413572	0.899454
44	0.12926814	8.88161090	1.14810932		44.00000000	0.78045455	6.93169360	0.920848
45	0.13947448	8.86835380	1.23690903		45.00000000	0.76311111	6.76753932	0.942331
46	0.14926624	8.87671760	1.32499426		46.00000000	0.74652174	6.62666266	0.963711
47	0.15940411	8.88019370	1.41553937		47.00000000	0.73063830	6.48820961	0.985082
48	0.16954197	8.87486550	1.50466218		48.00000000	0.71541667	6.34922669	1.006459
49	0.17937690	8.88123230	1.59308792		49.00000000	0.70081633	6.22411260	1.028010
50	0.18950956	8.87399290	1.68170649		50.00000000	0.68680000	6.09465832	1.049387
51	0.19928941	8.87961860	1.76961395		51.00000000	0.67333333	5.97894319	1.070735
52	0.20942877	8.87215330	1.85808415		52.00000000	0.66038462	5.85903354	1.092121
53	0.21923840	8.88163570	1.94719560		53.00000000	0.64792453	5.75462962	1.113605
54	0.22941719	8.87716010	2.03657313		54.00000000	0.63592593	5.64521626	1.134995
55	0.23922013	8.87234400	2.12244329		55.00000000	0.62436364	5.53956896	1.156362
56	0.24940264	8.87819290	2.21424475		56.00000000	0.61321429	5.44423472	1.177746
57	0.25953680	8.86524110	2.30085631		57.00000000	0.60245614	5.34091894	1.199229
58	0.26933452	8.86915590	2.38876985		58.00000000	0.59206897	5.25115196	1.220620
59	0.27947462	8.87236690	2.47960137		59.00000000	0.58203390	5.16401829	1.241983
60	0.28934452	8.88341810	2.57036835		60.00000000	0.57233333	5.08427629	1.263348
61	0.29947495	8.87508580	2.65786588		61.00000000	0.56295082	4.99623683	1.284841
62	0.30928457	8.87572290	2.74512414		62.00000000	0.55387097	4.91600523	1.306220
63	0.31943956	8.87025260	2.83350959		63.00000000	0.54507937	4.83499166	1.327591
64	0.32926035	8.87418270	2.92191650		64.00000000	0.53656250	4.76155365	1.348955
65	0.33939970	8.87574960	3.01242675		65.00000000	0.52830769	4.68912679	1.370437
66	0.34922123	8.86616710	3.09625378		66.00000000	0.52030303	4.61309361	1.391838
67	0.35939333	8.87051770	3.18800490		67.00000000	0.51253731	4.54647131	1.413228
68	0.36956692	8.87487030	3.27985848		68.00000000	0.50500000	4.48180950	1.434718
69	0.37935200	8.86073680	3.36133823		69.00000000	0.49768116	4.40982176	1.456116
70	0.38951516	8.86253260	3.45209080		70.00000000	0.49057143	4.34770528	1.477477
71	0.39934713	8.86844350	3.54158746		71.00000000	0.48366197	4.28932887	1.498858
72	0.40948871	8.86406800	3.62973577		72.00000000	0.47694444	4.22766799	1.520347
73	0.41930354	8.85808370	3.71422585		73.00000000	0.47041096	4.16693965	1.541725
74	0.42941463	8.86012080	3.80466550		74.00000000	0.46405405	4.11157498	1.563070
75	0.43929347	8.86360070	3.89372191		75.00000000	0.45786667	4.05834731	1.584455
76	0.44940156	8.86249070	3.98281715		76.00000000	0.45184211	4.00444646	1.605932
77	0.45956248	8.84529300	4.06496479		77.00000000	0.44597403	3.94477093	1.627364
78	0.46945623	8.84038160	4.15017222		78.00000000	0.44025641	3.89203467	1.648730
79	0.47957921	8.82904050	4.23422427		79.00000000	0.43468354	3.83783862	1.670116
80	0.48939627	8.82618620	4.31950260		80.00000000	0.42925000	3.78864043	1.691593
81	0.49949917	8.80022720	4.39570618		81.00000000	0.42395062	3.73086175	1.712970
82	0.50933111	8.78059480	4.47223010		82.00000000	0.41878049	3.67714177	1.734311
83	0.51943624	8.73043730	4.53490552		83.00000000	0.41373494	3.61208695	1.755694
84	0.52925408	8.68026640	4.59406641		84.00000000	0.40880952	3.54857557	1.777181
85	0.53936958	8.58619310	4.63113137		85.00000000	0.40400000	3.46882201	1.798556
86	0.54952604	8.45944500	4.64868531		86.00000000	0.39930233	3.37787606	1.819920
87	0.55931783	8.28940200	4.63641034		87.00000000	0.39471264	3.27193178	1.841301
88	0.56945640	8.06182480	4.59085773		88.00000000	0.39022727	3.14594390	1.862783
89	0.57926011	7.72149900	4.47275636		89.00000000	0.38584270	2.97928400	1.884162
90	0.58937341	7.27845000	4.28972490		90.00000000	0.38155556	2.77713303	1.905525
91	0.59918302	6.70415070	4.01701326		91.00000000	0.37736264	2.52989599	1.926893
92	0.60930228	5.96476080	3.63434236		92.00000000	0.37326087	2.22641180	1.948375
93	0.61911190	5.01412060	3.10430173		93.00000000	0.36924731	1.85145055	1.969769
94	0.62922668	3.86734720	2.43343804		94.00000000	0.36531915	1.41281599	1.991251
95	0.63934821	2.44601460	1.56385506		95.00000000	0.36147368	0.88416991	2.012654
96	0.64913774	0.82949251	0.53845489		96.00000000	0.35770833	0.29671638	2.034149
97	0.65918183	-1.10953030	-0.73138221		97.00000000	0.35402062	-0.39279660	2.055535
98	0.66895646	-3.28977820	-2.20071838		98.00000000	0.35040816	-1.15276514	2.076923
99	0.67903626	-5.90954690	-4.01279663		99.00000000	0.34686869	-2.04983677	2.098420
100	0.68895012	-8.83433060	-6.08641313		100.00000000	0.34340000	-3.03370913	2.119809
101	0.69246089	-10.00005400	-6.92464629		101.00000000	0.34000000	-3.40001836	2.141163
12:27 02/04/2018
Test Lot:	JK-PERC
Recipe:	Recipe_YJX-LID
Cell Name:	1-5-10min
Test Order:	4
Test Condition:	Light
1	-0.29988572	8.88290500	-2.66385636		1.00000000	34.34000000	305.03895770	0.000000
2	-0.29005033	8.87514310	-2.57423818		2.00000000	17.17000000	152.38620703	0.061798
3	-0.27994102	8.87874790	-2.48552574		3.00000000	11.44666667	101.63206763	0.083221
4	-0.27011085	8.86536410	-2.39463103		4.00000000	8.58500000	76.10915080	0.104720
5	-0.25997105	8.88625240	-2.31016837		5.00000000	6.86800000	61.03078148	0.126180
6	-0.24977319	8.87970070	-2.21791117		6.00000000	5.72333333	50.82148701	0.147539
7	-0.23998246	8.88240910	-2.13162239		7.00000000	4.90571429	43.57456121	0.168918
8	-0.22982033	8.86735150	-2.03789765		8.00000000	4.29250000	38.06310631	0.190407
9	-0.22000280	8.87480260	-1.95248142		9.00000000	3.81555556	33.86230236	0.211777
10	-0.20985034	8.86382680	-1.86007707		10.00000000	3.43400000	30.43838123	0.233137
11	-0.20004325	8.87667660	-1.77571924		11.00000000	3.12181818	27.71137040	0.254508
12	-0.18988110	8.87237450	-1.68469623		12.00000000	2.86166667	25.38977836	0.275985
13	-0.18012312	8.87606810	-1.59878508		13.00000000	2.64153846	23.44647527	0.297373
14	-0.16997215	8.86710450	-1.50716082		14.00000000	2.45285714	21.74974061	0.318719
15	-0.16014495	8.87887000	-1.42190619		15.00000000	2.28933333	20.32669305	0.340088
16	-0.14999026	8.86913010	-1.33028313		16.00000000	2.14625000	19.03537048	0.361566
17	-0.13984896	8.87793830	-1.24157044		17.00000000	2.02000000	17.93343537	0.382941
18	-0.13002922	8.86914730	-1.15324831		18.00000000	1.90777778	16.92036213	0.404325
19	-0.11990354	8.88231750	-1.06502131		19.00000000	1.80736842	16.05362016	0.425676
20	-0.11004211	8.87210750	-0.97630543		20.00000000	1.71700000	15.23340858	0.447157
21	-0.09988518	8.87913320	-0.88689383		21.00000000	1.63523810	14.51949686	0.468528
22	-0.09009520	8.86584950	-0.79877048		22.00000000	1.56090909	13.83878508	0.489914
23	-0.07994795	8.87156200	-0.70926318		23.00000000	1.49304348	13.24562779	0.511340
24	-0.07012075	8.87459090	-0.62229299		24.00000000	1.43083333	12.69806048	0.532802
25	-0.05996755	8.87706380	-0.53233575		25.00000000	1.37360000	12.19353484	0.554188
26	-0.04984337	8.87894340	-0.44255647		26.00000000	1.32076923	11.72703524	0.575556
27	-0.03998938	8.87306880	-0.35482850		27.00000000	1.27185185	11.28522898	0.596915
28	-0.02986743	8.86752990	-0.26485036		28.00000000	1.22642857	10.87539203	0.618410
29	-0.02004991	8.88036820	-0.17805061		29.00000000	1.18413793	10.51558083	0.639789
30	-0.00989596	8.86986450	-0.08777585		30.00000000	1.14466667	10.15303823	0.661171
31	-0.00065157	8.88076690	-0.00578640		31.00000000	1.10774194	9.83759791	0.682651
32	0.00950143	8.87714770	0.08434562		32.00000000	1.07312500	9.52628913	0.704135
33	0.01933282	8.87615300	0.17160102		33.00000000	1.04060606	9.23657861	0.725535
34	0.02944256	8.85838790	0.26081363		34.00000000	1.01000000	8.94697178	0.746917
35	0.03928436	8.89515110	0.34944034		35.00000000	0.98114286	8.72741396	0.768259
36	0.04943803	8.86058620	0.43804989		36.00000000	0.95388889	8.45201473	0.789726
37	0.05925824	8.87149720	0.52570932		37.00000000	0.92810811	8.23370848	0.811094
38	0.06940670	8.87040040	0.61566518		38.00000000	0.90368421	8.01604078	0.832473
39	0.07954472	8.86707780	0.70532925		39.00000000	0.88051282	7.80757568	0.853959
40	0.08934187	8.87035370	0.79249400		40.00000000	0.85850000	7.61519865	0.875356
41	0.09951414	8.87973590	0.88365930		41.00000000	0.83756098	7.43732026	0.896762
42	0.10932468	8.86758800	0.96944622		42.00000000	0.81761905	7.25030886	0.918142
43	0.11948802	8.87601760	1.06057777		43.00000000	0.79860465	7.08842894	0.939622
44	0.12929037	8.86334800	1.14594554		44.00000000	0.78045455	6.91744023	0.961018
45	0.13947083	8.87499810	1.23780335		45.00000000	0.76311111	6.77260966	0.982380
46	0.14924416	8.86989310	1.32377974		46.00000000	0.74652174	6.62156802	1.003746
47	0.15941642	8.87680050	1.41510776		47.00000000	0.73063830	6.48573041	1.025236
48	0.16953883	8.85687920	1.50158494		48.00000000	0.71541667	6.33635899	1.046611
49	0.17934342	8.87459560	1.59160033		49.00000000	0.70081633	6.21946149	1.067955
50	0.18950897	8.87150380	1.68122955		50.00000000	0.68680000	6.09294881	1.089329
51	0.19930688	8.87851240	1.76954861		51.00000000	0.67333333	5.97819835	1.110814
52	0.20946723	8.86921220	1.85780931		52.00000000	0.66038462	5.85709129	1.132197
53	0.21927479	8.86852930	1.94464490		53.00000000	0.64792453	5.74613766	1.153550
54	0.22941431	8.87085440	2.03510094		54.00000000	0.63592593	5.64120630	1.174920
55	0.23926727	8.86996170	2.12229152		55.00000000	0.62436364	5.53808154	1.196389
56	0.24939713	8.86286740	2.21037369		56.00000000	0.61321429	5.43483690	1.217773
57	0.25954854	8.87815860	2.30431310		57.00000000	0.60245614	5.34870116	1.239125
58	0.26936281	8.87180040	2.38973309		58.00000000	0.59206897	5.25271769	1.260503
59	0.27950159	8.87540720	2.48069042		59.00000000	0.58203390	5.16578785	1.281979
60	0.28934562	8.86013510	2.56364128		60.00000000	0.57233333	5.07095066	1.303350
61	0.29948217	8.87192540	2.65698347		61.00000000	0.56295082	4.99445768	1.324724
62	0.30931205	8.87470250	2.74505242		62.00000000	0.55387097	4.91544006	1.346085
63	0.31948134	8.86753850	2.83301308		63.00000000	0.54507937	4.83351226	1.367558
64	0.32926065	8.87336730	2.92165068		64.00000000	0.53656250	4.76111614	1.388944
65	0.33943513	8.86598490	3.00942674		65.00000000	0.52830769	4.68396802	1.410330
66	0.34921739	8.86469270	3.09570485		66.00000000	0.52030303	4.61232647	1.431670
67	0.35937402	8.88399120	3.19267563		67.00000000	0.51253731	4.55337698	1.453141
68	0.36954406	8.86262510	3.27513046		68.00000000	0.50500000	4.47562568	1.474516
69	0.37936950	8.87210270	3.36580517		69.00000000	0.49768116	4.41547836	1.495897
70	0.38953805	8.87563230	3.45739650		70.00000000	0.49057143	4.35413162	1.517420
71	0.39931434	8.86323640	3.53921739		71.00000000	0.48366197	4.28681039	1.538789
72	0.40948439	8.87278840	3.63326835		72.00000000	0.47694444	4.23182713	1.560134
73	0.41928300	8.85550120	3.71296111		73.00000000	0.47041096	4.16572481	1.581504
74	0.42947611	8.86892700	3.80899227		74.00000000	0.46405405	4.11566153	1.602980
75	0.43927923	8.85737040	3.89085885		75.00000000	0.45786667	4.05549466	1.624377
76	0.44946265	8.84805770	3.97687146		76.00000000	0.45184211	3.99792502	1.645726
77	0.45957911	8.86003490	4.07188695		77.00000000	0.44597403	3.95134543	1.667098
78	0.46944845	8.83936500	4.14962620		78.00000000	0.44025641	3.89158710	1.688591
79	0.47959170	8.83888630	4.23905651		79.00000000	0.43468354	3.84211842	1.709959
80	0.48937097	8.81213950	4.31240525		80.00000000	0.42925000	3.78261088	1.731323
81	0.49950603	8.81022360	4.40075981		81.00000000	0.42395062	3.73509973	1.752709
82	0.50933594	8.76061730	4.46209725		82.00000000	0.41878049	3.66877559	1.774183
83	0.51947021	8.73972700	4.54002782		83.00000000	0.41373494	3.61593042	1.795565
84	0.52924281	8.66670230	4.58678988		84.00000000	0.40880952	3.54303044	1.816921
85	0.53940243	8.58394430	4.63020041		85.00000000	0.40400000	3.46791350	1.838296
86	0.54953074	8.46291540	4.65063216		86.00000000	0.39930233	3.37926180	1.859774
87	0.55935323	8.29578500	4.64027414		87.00000000	0.39471264	3.27445123	1.881152
88	0.56947339	8.04647350	4.58225254		88.00000000	0.39022727	3.13995341	1.902492
89	0.57926756	7.72809790	4.47663641		89.00000000	0.38584270	2.98183013	1.923866
90	0.58939445	7.27331450	4.28685120		90.00000000	0.38155556	2.77517355	1.945345
91	0.59920573	6.70628790	4.01844614		91.00000000	0.37736264	2.53070249	1.966712
92	0.60927826	5.94532630	3.62235806		92.00000000	0.37326087	2.21915766	1.988197
93	0.61910444	5.02711960	3.11231206		93.00000000	0.36924731	1.85625040	2.009591
94	0.62921268	3.84858080	2.42157584		94.00000000	0.36531915	1.40596026	2.031082
95	0.63933730	2.44531420	1.56338058		95.00000000	0.36147368	0.88391673	2.052480
96	0.64912552	0.83624184	0.54282592		96.00000000	0.35770833	0.29913067	2.073857
97	0.65917277	-1.10874660	-0.73085557		97.00000000	0.35402062	-0.39251916	2.095240
98	0.66894531	-3.28774910	-2.19932434		98.00000000	0.35040816	-1.15205412	2.116714
99	0.67900449	-5.90407180	-4.00889126		99.00000000	0.34686869	-2.04793763	2.138136
100	0.68895197	-8.83244420	-6.08512983		100.00000000	0.34340000	-3.03306134	2.159534
101	0.69254023	-10.00018400	-6.92552973		101.00000000	0.34000000	-3.40006256	2.181022
