# Supplementary material for: Study on the Electrical Injection Regeneration of Industrialized B-Doped Czochralski Silicon PERC Solar Cells
Source: Hindawi journal article supplement (doi:10.1155/2019/5357370), 2019-06-20
Supplement: f1 [file 5357370.f1.zip › section3.2/IVRawData_1-5-20min.csv]

12:43 02/04/2018
Test Lot:	JK-PERC
Recipe:	Recipe_YJX-LID
Cell Name:	1-5-20min
Test Order:	2
Test Condition:	Light
1	-0.29989457	8.87906070	-2.66278209		1.00000000	34.34000000	304.90694444	0.000000
2	-0.29005501	8.88511850	-2.57717314		2.00000000	17.17000000	152.55748465	0.061724
3	-0.27993929	8.88061900	-2.48603418		3.00000000	11.44666667	101.65348549	0.083238
4	-0.27011609	8.88156220	-2.39905285		4.00000000	8.58500000	76.24821149	0.104623
5	-0.25997207	8.88325790	-2.30939894		5.00000000	6.86800000	61.01021526	0.125988
6	-0.24982436	8.88791560	-2.22041783		6.00000000	5.72333333	50.86850362	0.147359
7	-0.24002124	8.88261030	-2.13201514		7.00000000	4.90571429	43.57554824	0.168839
8	-0.22979240	8.88461970	-2.04161808		8.00000000	4.29250000	38.13723006	0.190215
9	-0.22001906	8.88854790	-1.95564995		9.00000000	3.81555556	33.91474832	0.211559
10	-0.20983338	8.89155390	-1.86574481		10.00000000	3.43400000	30.53359609	0.232989
11	-0.19999678	8.88080310	-1.77613202		11.00000000	3.12181818	27.72425259	0.254475
12	-0.18989372	8.87399860	-1.68511661		12.00000000	2.86166667	25.39442599	0.275846
13	-0.18009880	8.88663860	-1.60047295		13.00000000	2.64153846	23.47439766	0.297211
14	-0.16994736	8.87330440	-1.50799466		14.00000000	2.45285714	21.76494808	0.318586
15	-0.16012862	8.88728620	-1.42310887		15.00000000	2.28933333	20.34596054	0.340067
16	-0.14996006	8.88237480	-1.33200146		16.00000000	2.14625000	19.06379691	0.361457
17	-0.13983169	8.88519860	-1.24243234		17.00000000	2.02000000	17.94810117	0.382800
18	-0.13001443	8.88241860	-1.15484259		18.00000000	1.90777778	16.94568082	0.404176
19	-0.11987490	8.88472650	-1.06505570		19.00000000	1.80736842	16.05797411	0.425671
20	-0.11005989	8.88394360	-0.97776586		20.00000000	1.71700000	15.25373116	0.447041
21	-0.09988165	8.89949610	-0.88889635		21.00000000	1.63523810	14.55279505	0.468408
22	-0.09008449	8.88049600	-0.79999498		22.00000000	1.56090909	13.86164694	0.489779
23	-0.07992338	8.88245010	-0.70991540		23.00000000	1.49304348	13.26188419	0.511257
24	-0.07010464	8.88194470	-0.62266550		24.00000000	1.43083333	12.70858254	0.532654
25	-0.05999488	8.89252470	-0.53350595		25.00000000	1.37360000	12.21477193	0.554035
26	-0.04981292	8.87597470	-0.44213822		26.00000000	1.32076923	11.72311428	0.575375
27	-0.03999642	8.89244650	-0.35566598		27.00000000	1.27185185	11.30987455	0.596849
28	-0.02984051	8.87805940	-0.26492580		28.00000000	1.22642857	10.88830571	0.618227
29	-0.02003293	8.87283230	-0.17774884		29.00000000	1.18413793	10.50665728	0.639614
30	-0.00990531	8.88726330	-0.08803108		30.00000000	1.14466667	10.17295406	0.661034
31	-0.00063214	8.88372990	-0.00561573		31.00000000	1.10774194	9.84088015	0.682606
32	0.00951463	8.88146400	0.08450385		32.00000000	1.07312500	9.53092106	0.703975
33	0.01933160	8.88264560	0.17171577		33.00000000	1.04060606	9.24333485	0.725354
34	0.02945373	8.89221760	0.26190894		34.00000000	1.01000000	8.98113978	0.746708
35	0.03929377	8.87905410	0.34889154		35.00000000	0.98114286	8.71162051	0.768188
36	0.04944492	8.87854000	0.43899871		36.00000000	0.95388889	8.46914066	0.789577
37	0.05926487	8.88428880	0.52652624		37.00000000	0.92810811	8.24558047	0.810946
38	0.06939816	8.87992480	0.61625042		38.00000000	0.90368421	8.02464783	0.832311
39	0.07952475	8.88212490	0.70634874		39.00000000	0.88051282	7.82082485	0.853787
40	0.08937150	8.87647530	0.79330387		40.00000000	0.85850000	7.62045405	0.875156
41	0.09952860	8.88023570	0.88383745		41.00000000	0.83756098	7.43773888	0.896552
42	0.10933962	8.87740800	0.97065242		42.00000000	0.81761905	7.25833787	0.917917
43	0.11948705	8.88013840	1.06106154		43.00000000	0.79860465	7.09171983	0.939387
44	0.12932040	8.88173580	1.14858963		44.00000000	0.78045455	6.93179108	0.960775
45	0.13947229	8.87825970	1.23827121		45.00000000	0.76311111	6.77509862	0.982164
46	0.14928852	8.87940120	1.32559266		46.00000000	0.74652174	6.62866603	1.003635
47	0.15944265	8.88452240	1.41657180		47.00000000	0.73063830	6.49137232	1.025023
48	0.16959752	8.88353820	1.50662605		48.00000000	0.71541667	6.35543129	1.046370
49	0.17940556	8.88002680	1.59312618		49.00000000	0.70081633	6.22326776	1.067742
50	0.18955523	8.88435940	1.68407679		50.00000000	0.68680000	6.10177804	1.089234
51	0.19934390	8.88640880	1.77145139		51.00000000	0.67333333	5.98351526	1.110613
52	0.20948613	8.87265010	1.85869713		52.00000000	0.66038462	5.85936162	1.131968
53	0.21930608	8.88212110	1.94790316		53.00000000	0.64792453	5.75494412	1.153338
54	0.22944830	8.87899020	2.03726921		54.00000000	0.63592593	5.64638006	1.174814
55	0.23927867	8.88935570	2.12703321		55.00000000	0.62436364	5.55019045	1.196199
56	0.24943429	8.87840460	2.21457855		56.00000000	0.61321429	5.44436454	1.217547
57	0.25955641	8.87840270	2.30444633		57.00000000	0.60245614	5.34884822	1.238926
58	0.26937935	8.89313600	2.39562720		58.00000000	0.59206897	5.26534983	1.260405
59	0.27951187	8.88012700	2.48210090		59.00000000	0.58203390	5.16853494	1.281784
60	0.28935045	8.89179420	2.57284465		60.00000000	0.57233333	5.08907021	1.303135
61	0.29948819	8.87922380	2.65922266		61.00000000	0.56295082	4.99856632	1.324522
62	0.30931485	8.88293270	2.74762300		62.00000000	0.55387097	4.91999853	1.346007
63	0.31946376	8.88371660	2.83802551		63.00000000	0.54507937	4.84233060	1.367379
64	0.32927775	8.87334440	2.92179488		64.00000000	0.53656250	4.76110385	1.388731
65	0.33940583	8.86925130	3.01027560		65.00000000	0.52830769	4.68569369	1.410111
66	0.34925556	8.88287070	3.10239198		66.00000000	0.52030303	4.62178454	1.431583
67	0.35939032	8.87221340	3.18858761		67.00000000	0.51253731	4.54734042	1.452956
68	0.36953628	8.87899400	3.28111041		68.00000000	0.50500000	4.48389197	1.474314
69	0.37936515	8.87398910	3.36648221		69.00000000	0.49768116	4.41641718	1.495692
70	0.38952449	8.88028720	3.45908934		70.00000000	0.49057143	4.35641518	1.517183
71	0.39933997	8.87738510	3.54509470		71.00000000	0.48366197	4.29365358	1.538566
72	0.40947849	8.86916070	3.63173053		72.00000000	0.47694444	4.23009692	1.559961
73	0.41929692	8.87053590	3.71938838		73.00000000	0.47041096	4.17279730	1.581300
74	0.42945999	8.87023070	3.80940919		74.00000000	0.46405405	4.11626652	1.602765
75	0.43929186	8.86929130	3.89620747		75.00000000	0.45786667	4.06095284	1.624208
76	0.44944671	8.86963180	3.98642683		76.00000000	0.45184211	4.00767311	1.645604
77	0.45959565	8.85168930	4.06819790		77.00000000	0.44597403	3.94762351	1.667100
78	0.46944165	8.86225700	4.16031255		78.00000000	0.44025641	3.90166545	1.688487
79	0.47958833	8.83792780	4.23856703		79.00000000	0.43468354	3.84170178	1.709841
80	0.48940083	8.83372400	4.32323186		80.00000000	0.42925000	3.79187603	1.731220
81	0.49953115	8.79304410	4.39239943		81.00000000	0.42395062	3.72781647	1.752704
82	0.50934064	8.78485110	4.47448168		82.00000000	0.41878049	3.67892423	1.774079
83	0.51947916	8.73705860	4.53871986		83.00000000	0.41373494	3.61482641	1.795447
84	0.52927011	8.67380140	4.59078382		84.00000000	0.40880952	3.54593262	1.816832
85	0.53939521	8.58452700	4.63045274		85.00000000	0.40400000	3.46814891	1.838309
86	0.54953963	8.45568080	4.64673170		86.00000000	0.39930233	3.37637301	1.859679
87	0.55935735	8.28640750	4.63506294		87.00000000	0.39471264	3.27074981	1.881031
88	0.56947947	8.03686050	4.57682706		88.00000000	0.39022727	3.13620215	1.902404
89	0.57925630	7.72417640	4.47427784		89.00000000	0.38584270	2.98031705	1.923891
90	0.58940965	7.25471830	4.27600097		90.00000000	0.38155556	2.76807807	1.945268
91	0.59919912	6.69402070	4.01105131		91.00000000	0.37736264	2.52607331	1.966614
92	0.60932195	5.89808510	3.59383271		92.00000000	0.37326087	2.20152437	1.988097
93	0.61911732	4.99013470	3.08947882		93.00000000	0.36924731	1.84259382	2.009601
94	0.62919557	3.80359670	2.39320619		94.00000000	0.36531915	1.38952671	2.030999
95	0.63933557	2.37863420	1.52074545		95.00000000	0.36147368	0.85981367	2.052343
96	0.64906096	0.76324850	0.49539480		96.00000000	0.35770833	0.27302035	2.073710
97	0.65915704	-1.18027020	-0.77798341		97.00000000	0.35402062	-0.41783999	2.095190
98	0.66894424	-3.35712550	-2.24572977		98.00000000	0.35040816	-1.17636418	2.116579
99	0.67902100	-5.95974590	-4.04679262		99.00000000	0.34686869	-2.06724923	2.137948
100	0.68895775	-8.88523100	-6.12154876		100.00000000	0.34340000	-3.05118833	2.159327
101	0.69239855	-10.00029100	-6.92418699		101.00000000	0.34000000	-3.40009894	2.180800
12:44 02/04/2018
Test Lot:	JK-PERC
Recipe:	Recipe_YJX-LID
Cell Name:	1-5-20min
Test Order:	3
Test Condition:	Light
1	-0.29989761	8.88346670	-2.66413043		1.00000000	34.34000000	305.05824648	0.000000
2	-0.29004985	8.88941480	-2.57837343		2.00000000	17.17000000	152.63125212	0.061720
3	-0.27992818	8.88226030	-2.48639496		3.00000000	11.44666667	101.67227290	0.083227
4	-0.27010497	8.88683800	-2.40037911		4.00000000	8.58500000	76.29350423	0.104656
5	-0.25992525	8.87577530	-2.30703811		5.00000000	6.86800000	60.95882476	0.126014
6	-0.24977157	8.89917760	-2.22276156		6.00000000	5.72333333	50.93295980	0.147385
7	-0.23996623	8.87759590	-2.13032322		7.00000000	4.90571429	43.55094903	0.168910
8	-0.22980882	8.88760950	-2.04245105		8.00000000	4.29250000	38.15006378	0.190290
9	-0.21997891	8.88212680	-1.95388057		9.00000000	3.81555556	33.89024826	0.211668
10	-0.20984682	8.88061520	-1.86356886		10.00000000	3.43400000	30.49603260	0.233046
11	-0.20001321	8.87284470	-1.77468615		11.00000000	3.12181818	27.69940791	0.254532
12	-0.18986547	8.89409920	-1.68868232		12.00000000	2.86166667	25.45194721	0.275911
13	-0.18008469	8.86476610	-1.59640866		13.00000000	2.64153846	23.41662061	0.297263
14	-0.16993177	8.88104720	-1.50917207		14.00000000	2.45285714	21.78394006	0.318640
15	-0.16011004	8.87509250	-1.42099142		15.00000000	2.28933333	20.31804510	0.340117
16	-0.14998837	8.88177010	-1.33216222		16.00000000	2.14625000	19.06249908	0.361497
17	-0.13982502	8.88614560	-1.24250549		17.00000000	2.02000000	17.95001411	0.382860
18	-0.13002563	8.87539960	-1.15402942		18.00000000	1.90777778	16.93229013	0.404232
19	-0.11987568	8.87771800	-1.06422248		19.00000000	1.80736842	16.04530716	0.425703
20	-0.11005023	8.87509920	-0.97670671		20.00000000	1.71700000	15.23854533	0.447076
21	-0.09989061	8.87896920	-0.88692561		21.00000000	1.63523810	14.51922868	0.468461
22	-0.09009940	8.88529110	-0.80055941		22.00000000	1.56090909	13.86913165	0.489815
23	-0.07994945	8.87216380	-0.70932458		23.00000000	1.49304348	13.24652630	0.511282
24	-0.07010838	8.87922290	-0.62250790		24.00000000	1.43083333	12.70468810	0.532655
25	-0.05997628	8.87959000	-0.53256480		25.00000000	1.37360000	12.19700482	0.554028
26	-0.04982038	8.88033100	-0.44242142		26.00000000	1.32076923	11.72886794	0.575510
27	-0.03997558	8.87787630	-0.35489829		27.00000000	1.27185185	11.29134341	0.596897
28	-0.02984051	8.88782600	-0.26521730		28.00000000	1.22642857	10.90028374	0.618251
29	-0.02006569	8.86635110	-0.17790942		29.00000000	1.18413793	10.49898265	0.639633
30	-0.00988298	8.88420960	-0.08780248		30.00000000	1.14466667	10.16945859	0.661107
31	-0.00064926	8.88234710	-0.00576691		31.00000000	1.10774194	9.83934837	0.682603
32	0.00951166	8.87794300	0.08444393		32.00000000	1.07312500	9.52714258	0.703962
33	0.01931523	8.88860230	0.17168542		33.00000000	1.04060606	9.24953342	0.725336
34	0.02946862	8.88000110	0.26168136		34.00000000	1.01000000	8.96880111	0.746825
35	0.03930941	8.86869620	0.34862321		35.00000000	0.98114286	8.70145793	0.768215
36	0.04944568	8.88745880	0.43944643		36.00000000	0.95388889	8.47764820	0.789560
37	0.05926712	8.88186840	0.52640275		37.00000000	0.92810811	8.24333408	0.810939
38	0.06940562	8.87404820	0.61590877		38.00000000	0.90368421	8.01933724	0.832423
39	0.07956050	8.89087010	0.70736204		39.00000000	0.88051282	7.82852511	0.853810
40	0.08937226	8.87345890	0.79304103		40.00000000	0.85850000	7.61786447	0.875163
41	0.09950481	8.89037800	0.88463534		41.00000000	0.83756098	7.44623367	0.896533
42	0.10936569	8.87726210	0.97086789		42.00000000	0.81761905	7.25821858	0.918017
43	0.11948930	8.87595560	1.06058172		43.00000000	0.79860465	7.08837943	0.939406
44	0.12933308	8.88993360	1.14976249		44.00000000	0.78045455	6.93818909	0.960755
45	0.13947827	8.86981770	1.23714683		45.00000000	0.76311111	6.76865644	0.982120
46	0.14927441	8.87770270	1.32521383		46.00000000	0.74652174	6.62739806	1.003603
47	0.15943970	8.87786480	1.41548410		47.00000000	0.73063830	6.48650803	1.024979
48	0.16958565	8.88373090	1.50655328		48.00000000	0.71541667	6.35556915	1.046315
49	0.17941900	8.88021090	1.59327856		49.00000000	0.70081633	6.22339678	1.067696
50	0.18954037	8.87841030	1.68281717		50.00000000	0.68680000	6.09769219	1.089180
51	0.19931120	8.87464050	1.76881525		51.00000000	0.67333333	5.97559127	1.110574
52	0.20945938	8.87117770	1.85815138		52.00000000	0.66038462	5.85838927	1.131955
53	0.21924807	8.88313960	1.94761121		53.00000000	0.64792453	5.75560404	1.153298
54	0.22942528	8.88043120	2.03739541		54.00000000	0.63592593	5.64729643	1.174775
55	0.23926011	8.88526440	2.12588934		55.00000000	0.62436364	5.54763599	1.196153
56	0.24940456	8.87908460	2.21448419		56.00000000	0.61321429	5.44478152	1.217537
57	0.25952595	8.87989710	2.30456373		57.00000000	0.60245614	5.34974853	1.239021
58	0.26937345	8.87696840	2.39121960		58.00000000	0.59206897	5.25577750	1.260482
59	0.27952087	8.87397960	2.48046250		59.00000000	0.58203390	5.16495694	1.281845
60	0.28934753	8.88454820	2.57072208		60.00000000	0.57233333	5.08492309	1.303237
61	0.29948452	8.87593750	2.65820588		61.00000000	0.56295082	4.99671629	1.324573
62	0.30929706	8.88012120	2.74659538		62.00000000	0.55387097	4.91844132	1.346053
63	0.31945118	8.88092710	2.83702264		63.00000000	0.54507937	4.84081010	1.367450
64	0.32930237	8.87604240	2.92290180		64.00000000	0.53656250	4.76255150	1.388846
65	0.33943716	8.87683680	3.01312827		65.00000000	0.52830769	4.68970116	1.410214
66	0.34923106	8.87727070	3.10021866		66.00000000	0.52030303	4.61887085	1.431686
67	0.35940379	8.86947060	3.18772135		67.00000000	0.51253731	4.54593463	1.453058
68	0.36959812	8.87002940	3.27834619		68.00000000	0.50500000	4.47936485	1.474450
69	0.37939352	8.88354680	3.37036009		69.00000000	0.49768116	4.42117387	1.495801
70	0.38953051	8.86510940	3.45323059		70.00000000	0.49057143	4.34896938	1.517276
71	0.39936760	8.87107090	3.54281829		71.00000000	0.48366197	4.29059964	1.538665
72	0.40952173	8.86668300	3.63109936		72.00000000	0.47694444	4.22891520	1.560046
73	0.41932753	8.88019280	3.72370931		73.00000000	0.47041096	4.17734001	1.581524
74	0.42945114	8.86125280	3.80547512		74.00000000	0.46405405	4.11210029	1.602915
75	0.43927407	8.86372760	3.89360570		75.00000000	0.45786667	4.05840541	1.624253
76	0.44944012	8.86717410	3.98526379		76.00000000	0.45184211	4.00656261	1.645625
77	0.45959127	8.85763170	4.07089020		77.00000000	0.44597403	3.95027367	1.667114
78	0.46942982	8.85239600	4.15557866		78.00000000	0.44025641	3.89732409	1.688498
79	0.47958767	8.84082410	4.23995023		79.00000000	0.43468354	3.84296075	1.709848
80	0.48940688	8.82550240	4.31926159		80.00000000	0.42925000	3.78834691	1.731235
81	0.49953720	8.80125520	4.39655438		81.00000000	0.42395062	3.73129757	1.752709
82	0.50934899	8.78502750	4.47464488		82.00000000	0.41878049	3.67899810	1.774087
83	0.51949418	8.73375130	4.53713297		83.00000000	0.41373494	3.61345807	1.795435
84	0.52923673	8.67397120	4.59058415		84.00000000	0.40880952	3.54600204	1.816806
85	0.53937221	8.59102540	4.63376036		85.00000000	0.40400000	3.47077426	1.838280
86	0.54952413	8.47031020	4.65463984		86.00000000	0.39930233	3.38221456	1.859659
87	0.55932099	8.29580690	4.64001893		87.00000000	0.39471264	3.27445987	1.881002
88	0.56948256	8.04865650	4.58356951		88.00000000	0.39022727	3.14080528	1.902388
89	0.57926607	7.73006300	4.47776321		89.00000000	0.38584270	2.98258835	1.923870
90	0.58938968	7.27771190	4.28940829		90.00000000	0.38155556	2.77685141	1.945239
91	0.59917909	6.70150420	4.01540119		91.00000000	0.37736264	2.52889730	1.966598
92	0.60927522	5.94252350	3.62063231		92.00000000	0.37326087	2.21811149	1.988066
93	0.61910629	5.00294830	3.09735676		93.00000000	0.36924731	1.84732521	2.009572
94	0.62920463	3.82704190	2.40799248		94.00000000	0.36531915	1.39809169	2.030952
95	0.63933867	2.40070270	1.53486207		95.00000000	0.36147368	0.86779085	2.052305
96	0.64909011	0.76648176	0.49751573		96.00000000	0.35770833	0.27417691	2.073683
97	0.65917951	-1.19346930	-0.78671051		97.00000000	0.35402062	-0.42251274	2.095165
98	0.66891533	-3.40510700	-2.27772827		98.00000000	0.35040816	-1.19317729	2.116562
99	0.67902410	-6.04691550	-4.10600136		99.00000000	0.34686869	-2.09748564	2.137955
100	0.68898100	-9.02146150	-6.21561557		100.00000000	0.34340000	-3.09796988	2.159359
101	0.69189256	-9.99991890	-6.91886949		101.00000000	0.34000000	-3.39997243	2.180843
12:44 02/04/2018
Test Lot:	JK-PERC
Recipe:	Recipe_YJX-LID
Cell Name:	1-5-20min
Test Order:	4
Test Condition:	Light
1	-0.29986802	8.88636300	-2.66473608		1.00000000	34.34000000	305.15770542	0.000000
2	-0.29006404	8.87623020	-2.57467519		2.00000000	17.17000000	152.40487253	0.061773
3	-0.27992144	8.89086910	-2.48874488		3.00000000	11.44666667	101.77081496	0.083251
4	-0.27013236	8.87924770	-2.39857214		4.00000000	8.58500000	76.22834150	0.104762
5	-0.25994211	8.86849310	-2.30529481		5.00000000	6.86800000	60.90881061	0.126144
6	-0.24978311	8.88042550	-2.21818030		6.00000000	5.72333333	50.82563528	0.147506
7	-0.23996501	8.88198090	-2.13136464		7.00000000	4.90571429	43.57246059	0.168878
8	-0.22982091	8.86773200	-2.03799024		8.00000000	4.29250000	38.06473961	0.190351
9	-0.22000355	8.89082910	-1.95601396		9.00000000	3.81555556	33.92345237	0.211732
10	-0.20985126	8.87035940	-1.86145610		10.00000000	3.43400000	30.46081418	0.233076
11	-0.20006591	8.87740330	-1.77606577		11.00000000	3.12181818	27.71363903	0.254447
12	-0.18989204	8.88144490	-1.68651569		12.00000000	2.86166667	25.41573482	0.275930
13	-0.18010966	8.88732810	-1.60069364		13.00000000	2.64153846	23.47621900	0.297295
14	-0.16992089	8.88215450	-1.50926360		14.00000000	2.45285714	21.78665611	0.318652
15	-0.16013183	8.87701130	-1.42149206		15.00000000	2.28933333	20.32243787	0.340028
16	-0.15001005	8.88076970	-1.33220471		16.00000000	2.14625000	19.06035197	0.361507
17	-0.13986817	8.88184550	-1.24228748		17.00000000	2.02000000	17.94132791	0.382898
18	-0.13000244	8.88413520	-1.15495925		18.00000000	1.90777778	16.94895571	0.404247
19	-0.11984866	8.87664030	-1.06385345		19.00000000	1.80736842	16.04335936	0.425612
20	-0.11003353	8.88393690	-0.97753094		20.00000000	1.71700000	15.25371966	0.447089
21	-0.09985966	8.87335970	-0.88609064		21.00000000	1.63523810	14.51005581	0.468462
22	-0.09006314	8.89108660	-0.80075918		22.00000000	1.56090909	13.87817790	0.489839
23	-0.07988554	8.87267020	-0.70879807		23.00000000	1.49304348	13.24728238	0.511197
24	-0.07008158	8.87593170	-0.62203935		24.00000000	1.43083333	12.69997894	0.532668
25	-0.05995907	8.88952730	-0.53300775		25.00000000	1.37360000	12.21065470	0.554047
26	-0.04980008	8.88328460	-0.44238825		26.00000000	1.32076923	11.73276897	0.575433
27	-0.03998123	8.87125210	-0.35468358		27.00000000	1.27185185	11.28291841	0.596825
28	-0.02984978	8.88229270	-0.26513447		28.00000000	1.22642857	10.89349755	0.618301
29	-0.02001456	8.88865660	-0.17790255		29.00000000	1.18413793	10.52539544	0.639670
30	-0.00986524	8.88054750	-0.08760877		30.00000000	1.14466667	10.16526671	0.661045
31	-0.00061654	8.87518220	-0.00547187		31.00000000	1.10774194	9.83141151	0.682650
32	0.00952662	8.87325100	0.08453205		32.00000000	1.07312500	9.52210748	0.704028
33	0.01934518	8.87939450	0.17177349		33.00000000	1.04060606	9.23995173	0.725372
34	0.02948007	8.87653730	0.26168091		34.00000000	1.01000000	8.96530267	0.746753
35	0.03927853	8.87570290	0.34862459		35.00000000	0.98114286	8.70833250	0.768226
36	0.04943202	8.88937760	0.43941993		36.00000000	0.95388889	8.47947852	0.789605
37	0.05923794	8.88379480	0.52625769		37.00000000	0.92810811	8.24512198	0.810974
38	0.06939068	8.87027740	0.61551462		38.00000000	0.90368421	8.01592963	0.832352
39	0.07954343	8.88504700	0.70674715		39.00000000	0.88051282	7.82339779	0.853823
40	0.08937242	8.87874320	0.79351476		40.00000000	0.85850000	7.62240104	0.875201
41	0.09949613	8.87219810	0.88274941		41.00000000	0.83756098	7.43100690	0.896543
42	0.10933852	8.88096620	0.97103170		42.00000000	0.81761905	7.26124713	0.917914
43	0.11945554	8.88047600	1.06082206		43.00000000	0.79860465	7.09198944	0.939401
44	0.12928304	8.88963410	1.14927892		44.00000000	0.78045455	6.93795534	0.960777
45	0.13943727	8.87815090	1.23794512		45.00000000	0.76311111	6.77501560	0.982143
46	0.14926700	8.89008140	1.32699578		46.00000000	0.74652174	6.63663903	1.003509
47	0.15942347	8.86315440	1.41299483		47.00000000	0.73063830	6.47576004	1.024978
48	0.16957027	8.88221260	1.50615919		48.00000000	0.71541667	6.35448293	1.046369
49	0.17939255	8.87391570	1.59191437		49.00000000	0.70081633	6.21898500	1.067716
50	0.18953189	8.88364120	1.68373331		50.00000000	0.68680000	6.10128478	1.089100
51	0.19931696	8.88126370	1.77018648		51.00000000	0.67333333	5.98005089	1.110581
52	0.20949055	8.87672040	1.85958904		52.00000000	0.66038462	5.86204959	1.131964
53	0.21929945	8.87473300	1.94622407		53.00000000	0.64792453	5.75015719	1.153377
54	0.22943209	8.88712600	2.03899189		54.00000000	0.63592593	5.65155383	1.174736
55	0.23928416	8.87924100	2.12466172		55.00000000	0.62436364	5.54387520	1.196208
56	0.24942425	8.88226130	2.21545136		56.00000000	0.61321429	5.44672952	1.217598
57	0.25955614	8.87341790	2.30315010		57.00000000	0.60245614	5.34584510	1.238980
58	0.26936802	8.88203910	2.39253729		58.00000000	0.59206897	5.25877970	1.260320
59	0.27950960	8.86565970	2.47803700		59.00000000	0.58203390	5.16011448	1.281798
60	0.28935942	8.88060760	2.56968746		60.00000000	0.57233333	5.08266775	1.303179
61	0.29950547	8.87618160	2.65846494		61.00000000	0.56295082	4.99685371	1.324560
62	0.30932555	8.87176230	2.74426275		62.00000000	0.55387097	4.91381157	1.346054
63	0.31947827	8.87760540	2.83620201		63.00000000	0.54507937	4.83899951	1.367416
64	0.32931322	8.86579990	2.91962511		64.00000000	0.53656250	4.75705576	1.388763
65	0.33945480	8.87617680	3.01306082		65.00000000	0.52830769	4.68935248	1.410152
66	0.34925103	8.87071320	3.09810572		66.00000000	0.52030303	4.61545896	1.431631
67	0.35939634	8.87232020	3.18867941		67.00000000	0.51253731	4.54739516	1.453024
68	0.36954686	8.87090300	3.27821435		68.00000000	0.50500000	4.47980602	1.474374
69	0.37938774	8.87631320	3.36756440		69.00000000	0.49768116	4.41757384	1.495750
70	0.38950178	8.87346840	3.45623174		70.00000000	0.49057143	4.35307007	1.517225
71	0.39934492	8.87510400	3.54422770		71.00000000	0.48366197	4.29255030	1.538594
72	0.40949246	8.86638360	3.63071723		72.00000000	0.47694444	4.22877240	1.559933
73	0.41931176	8.87662700	3.72207409		73.00000000	0.47041096	4.17566262	1.581317
74	0.42948908	8.85772610	3.80429663		74.00000000	0.46405405	4.11046371	1.602802
75	0.43928456	8.87939930	3.90058301		75.00000000	0.45786667	4.06558096	1.624175
76	0.44944328	8.86391540	3.98382721		76.00000000	0.45184211	4.00509020	1.645534
77	0.45959452	8.85648440	4.07039170		77.00000000	0.44597403	3.94976200	1.666914
78	0.46945477	8.85923770	4.15901140		78.00000000	0.44025641	3.90033619	1.688394
79	0.47956210	8.84493450	4.24169536		79.00000000	0.43468354	3.84474748	1.709778
80	0.48938739	8.81457420	4.31374146		80.00000000	0.42925000	3.78365598	1.731128
81	0.49952599	8.81638150	4.40401170		81.00000000	0.42395062	3.73771038	1.752505
82	0.50934607	8.76337720	4.46359174		82.00000000	0.41878049	3.66993138	1.773992
83	0.51949507	8.74162390	4.54123052		83.00000000	0.41373494	3.61671524	1.795368
84	0.52925932	8.66565800	4.58638026		84.00000000	0.40880952	3.54260352	1.816735
85	0.53939939	8.59006400	4.63347528		85.00000000	0.40400000	3.47038586	1.838101
86	0.54955435	8.45729350	4.64774243		86.00000000	0.39930233	3.37701696	1.859581
87	0.55933869	8.29582020	4.64017320		87.00000000	0.39471264	3.27446512	1.880971
88	0.56950337	8.05118180	4.58517517		88.00000000	0.39022727	3.14179072	1.902355
89	0.57930404	7.72211890	4.47345468		89.00000000	0.38584270	2.97952318	1.923705
90	0.58939874	7.26480340	4.28186597		90.00000000	0.38155556	2.77192610	1.945188
91	0.59921283	6.70106790	4.01536586		91.00000000	0.37736264	2.52873266	1.966558
92	0.60931945	5.92152790	3.60810212		92.00000000	0.37326087	2.21027465	1.988041
93	0.61912239	5.00162030	3.09661511		93.00000000	0.36924731	1.84683485	2.009555
94	0.62920070	3.81862120	2.40267913		94.00000000	0.36531915	1.39501545	2.030943
95	0.63936388	2.40801910	1.53960043		95.00000000	0.36147368	0.87043554	2.052299
96	0.64908272	0.78021103	0.50642150		96.00000000	0.35770833	0.27908799	2.073674
97	0.65918112	-1.18463550	-0.78088936		97.00000000	0.35402062	-0.41938539	2.095190
98	0.66893643	-3.36376790	-2.25014689		98.00000000	0.35040816	-1.17869173	2.116573
99	0.67901325	-6.01864000	-4.08673631		99.00000000	0.34686869	-2.08767775	2.137918
100	0.68897772	-8.96900750	-6.17944634		100.00000000	0.34340000	-3.07995718	2.159284
101	0.69209105	-10.00039100	-6.92118111		101.00000000	0.34000000	-3.40013294	2.180773
