# Supplementary material for: Study on the Electrical Injection Regeneration of Industrialized B-Doped Czochralski Silicon PERC Solar Cells
Source: Hindawi journal article supplement (doi:10.1155/2019/5357370), 2019-06-20
Supplement: f1 [file 5357370.f1.zip › section3.2/IVRawData_1-5-30min.csv]

13:03 02/04/2018
Test Lot:	JK-PERC
Recipe:	Recipe_YJX-LID
Cell Name:	1-5-30min
Test Order:	2
Test Condition:	Light
1	-0.29990417	8.88103290	-2.66345880		1.00000000	34.34000000	304.97466979	0.000000
2	-0.29009274	8.86724190	-2.57232250		2.00000000	17.17000000	152.25054342	0.061763
3	-0.27992257	8.88267990	-2.48646259		3.00000000	11.44666667	101.67707592	0.083289
4	-0.27014911	8.87525370	-2.39764189		4.00000000	8.58500000	76.19405301	0.104685
5	-0.25998417	8.86981490	-2.30601146		5.00000000	6.86800000	60.91788873	0.126027
6	-0.24984302	8.88915730	-2.22089391		6.00000000	5.72333333	50.87561028	0.147399
7	-0.23999438	8.86395550	-2.12729950		7.00000000	4.90571429	43.48403312	0.168879
8	-0.22985026	8.87958810	-2.04097563		8.00000000	4.29250000	38.11563192	0.190308
9	-0.21999717	8.88192560	-1.95399850		9.00000000	3.81555556	33.88948057	0.211695
10	-0.20989026	8.86265090	-1.86018410		10.00000000	3.43400000	30.43434319	0.233075
11	-0.20001855	8.87519170	-1.77520297		11.00000000	3.12181818	27.70673482	0.254557
12	-0.18989825	8.87528230	-1.68540058		12.00000000	2.86166667	25.39809952	0.275945
13	-0.18012704	8.86676410	-1.59714397		13.00000000	2.64153846	23.42189840	0.297300
14	-0.17000003	8.87266540	-1.50835338		14.00000000	2.45285714	21.76338070	0.318672
15	-0.16018713	8.86454960	-1.41998676		15.00000000	2.28933333	20.29390888	0.340165
16	-0.14998198	8.88134860	-1.33204225		16.00000000	2.14625000	19.06159443	0.361545
17	-0.13991378	8.87795540	-1.24214830		17.00000000	2.02000000	17.93346991	0.382894
18	-0.13004506	8.87570100	-1.15424107		18.00000000	1.90777778	16.93286513	0.404280
19	-0.11990763	8.87252710	-1.06388370		19.00000000	1.80736842	16.03592530	0.425766
20	-0.11006049	8.87220950	-0.97647972		20.00000000	1.71700000	15.23358371	0.447148
21	-0.09990372	8.87393570	-0.88653917		21.00000000	1.63523810	14.51099771	0.468510
22	-0.09010570	8.87305930	-0.79951320		22.00000000	1.56090909	13.85003893	0.489898
23	-0.07998093	8.86685470	-0.70917930		23.00000000	1.49304348	13.23859958	0.511368
24	-0.07013379	8.87723640	-0.62259423		24.00000000	1.43083333	12.70184575	0.532750
25	-0.05999786	8.86025240	-0.53159616		25.00000000	1.37360000	12.17044270	0.554116
26	-0.04984481	8.88843630	-0.44304237		26.00000000	1.32076923	11.73957317	0.575485
27	-0.04001404	8.87060740	-0.35494884		27.00000000	1.27185185	11.28209845	0.596982
28	-0.02986322	8.86802100	-0.26482768		28.00000000	1.22642857	10.87599433	0.618358
29	-0.02003320	8.86659240	-0.17762619		29.00000000	1.18413793	10.49926838	0.639753
30	-0.00990918	8.88066770	-0.08800009		30.00000000	1.14466667	10.16540429	0.661103
31	-0.00068427	8.87535860	-0.00607315		31.00000000	1.10774194	9.83160691	0.682698
32	0.00948048	8.88179400	0.08420368		32.00000000	1.07312500	9.53127519	0.704089
33	0.01930501	8.87145230	0.17126350		33.00000000	1.04060606	9.23168703	0.725469
34	0.02945033	8.88290020	0.26160437		34.00000000	1.01000000	8.97172920	0.746945
35	0.03926668	8.86773590	0.34820654		35.00000000	0.98114286	8.70051574	0.768315
36	0.04942912	8.87788870	0.43882618		36.00000000	0.95388889	8.46851939	0.789670
37	0.05924472	8.85657410	0.52470524		37.00000000	0.92810811	8.21985823	0.811047
38	0.06938483	8.88650040	0.61658830		38.00000000	0.90368421	8.03059010	0.832537
39	0.07953833	8.86402610	0.70502983		39.00000000	0.88051282	7.80488862	0.853915
40	0.08933161	8.88777160	0.79395890		40.00000000	0.85850000	7.63015192	0.875271
41	0.09952381	8.86582950	0.88236116		41.00000000	0.83756098	7.42567281	0.896647
42	0.10933123	8.86831470	0.96958375		42.00000000	0.81761905	7.25090302	0.918133
43	0.11946836	8.87310410	1.06005519		43.00000000	0.79860465	7.08610220	0.939517
44	0.12929736	8.88086800	1.14827279		44.00000000	0.78045455	6.93111380	0.960874
45	0.13945012	8.86770060	1.23660191		45.00000000	0.76311111	6.76704086	0.982252
46	0.14924042	8.86420440	1.32289759		46.00000000	0.74652174	6.61732128	1.003738
47	0.15940955	8.86896900	1.41379836		47.00000000	0.73063830	6.48000841	1.025103
48	0.16954593	8.87114810	1.50406705		48.00000000	0.71541667	6.34656720	1.046498
49	0.17936601	8.87686920	1.59220861		49.00000000	0.70081633	6.22105486	1.067877
50	0.18950313	8.87262730	1.68139064		50.00000000	0.68680000	6.09372043	1.089346
51	0.19925325	8.87410740	1.76819474		51.00000000	0.67333333	5.97523232	1.110725
52	0.20944247	8.87042430	1.85784358		52.00000000	0.66038462	5.85789174	1.132065
53	0.21926627	8.86927600	1.94473307		53.00000000	0.64792453	5.74662147	1.153435
54	0.22938329	8.87424280	2.03560301		54.00000000	0.63592593	5.64336107	1.174919
55	0.23924504	8.87416080	2.12309896		55.00000000	0.62436364	5.54070331	1.196293
56	0.24936655	8.86069770	2.20956162		56.00000000	0.61321429	5.43350641	1.217664
57	0.25954312	8.88641360	2.30640751		57.00000000	0.60245614	5.35367444	1.239025
58	0.26931259	8.86469840	2.38737489		58.00000000	0.59206897	5.24851281	1.260500
59	0.27948245	8.87298580	2.47984381		59.00000000	0.58203390	5.16437851	1.281880
60	0.28930700	8.87469480	2.56751133		60.00000000	0.57233333	5.07928366	1.303269
61	0.29947388	8.86401270	2.65454028		61.00000000	0.56295082	4.99000322	1.324612
62	0.30930662	8.88420580	2.74794367		62.00000000	0.55387097	4.92070366	1.346082
63	0.31944373	8.85757260	2.82949603		63.00000000	0.54507937	4.82808005	1.367461
64	0.32928094	8.86674590	2.91965042		64.00000000	0.53656250	4.75756335	1.388842
65	0.33941287	8.88539510	3.01581745		65.00000000	0.52830769	4.69422258	1.410323
66	0.34923366	8.86788080	3.09696247		66.00000000	0.52030303	4.61398525	1.431697
67	0.35940281	8.88234810	3.19234087		67.00000000	0.51253731	4.55253483	1.453075
68	0.36955482	8.86630340	3.27658516		68.00000000	0.50500000	4.47748322	1.474462
69	0.37935776	8.87046050	3.36507803		69.00000000	0.49768116	4.41466107	1.495948
70	0.38952467	8.84981540	3.44722142		70.00000000	0.49057143	4.34146658	1.517326
71	0.39935219	8.87829780	3.54556767		71.00000000	0.48366197	4.29409502	1.538691
72	0.40947220	8.86128040	3.62844798		72.00000000	0.47694444	4.22633846	1.560060
73	0.41929302	8.86719130	3.71795142		73.00000000	0.47041096	4.17122396	1.581540
74	0.42944056	8.85862540	3.80425305		74.00000000	0.46405405	4.11088103	1.602921
75	0.43926805	8.85952470	3.89170614		75.00000000	0.45786667	4.05648104	1.624270
76	0.44944316	8.85703850	3.98073537		76.00000000	0.45184211	4.00198292	1.645635
77	0.45956391	8.85738560	4.07053476		77.00000000	0.44597403	3.95016392	1.667112
78	0.46942639	8.84383580	4.15152991		78.00000000	0.44025641	3.89355540	1.688492
79	0.47955608	8.83500480	4.23688027		79.00000000	0.43468354	3.84043120	1.709858
80	0.48934415	8.81428910	4.31322081		80.00000000	0.42925000	3.78353360	1.731225
81	0.49948278	8.79224400	4.39157448		81.00000000	0.42395062	3.72747727	1.752710
82	0.50932592	8.77604390	4.46986663		82.00000000	0.41878049	3.67523595	1.774094
83	0.51944667	8.72611520	4.53275148		83.00000000	0.41373494	3.61029875	1.795452
84	0.52922505	8.66883370	4.58776395		84.00000000	0.40880952	3.54390178	1.816830
85	0.53934580	8.57773970	4.62636788		85.00000000	0.40400000	3.46540684	1.838297
86	0.54949784	8.45875450	4.64806733		86.00000000	0.39930233	3.37760034	1.859684
87	0.55932015	8.28799820	4.63564440		87.00000000	0.39471264	3.27137768	1.881041
88	0.56944686	8.01586910	4.56461149		88.00000000	0.39022727	3.12801074	1.902411
89	0.57924461	7.70173600	4.46118907		89.00000000	0.38584270	2.97165859	1.923895
90	0.58938915	7.25328970	4.27501025		90.00000000	0.38155556	2.76753298	1.945262
91	0.59917498	6.66533370	3.99370119		91.00000000	0.37736264	2.51524790	1.966658
92	0.60928977	5.92096190	3.60758151		92.00000000	0.37326087	2.21006339	1.988128
93	0.61907637	4.97328570	3.07884366		93.00000000	0.36924731	1.83637238	2.009624
94	0.62919265	3.79785680	2.38958358		94.00000000	0.36531915	1.38742981	2.031053
95	0.63931865	2.37620210	1.51915032		95.00000000	0.36147368	0.85893453	2.052443
96	0.64906055	0.74475145	0.48338879		96.00000000	0.35770833	0.26640380	2.073950
97	0.65916342	-1.21810940	-0.80293316		97.00000000	0.35402062	-0.43123584	2.095330
98	0.66892469	-3.39234920	-2.26922614		98.00000000	0.35040816	-1.18870685	2.116682
99	0.67900079	-6.02255870	-4.08932212		99.00000000	0.34686869	-2.08903703	2.138062
100	0.68895930	-8.96943000	-6.17957221		100.00000000	0.34340000	-3.08010226	2.159540
101	0.69209272	-10.00006500	-6.92097219		101.00000000	0.34000000	-3.40002210	2.180923
13:04 02/04/2018
Test Lot:	JK-PERC
Recipe:	Recipe_YJX-LID
Cell Name:	1-5-30min
Test Order:	3
Test Condition:	Light
1	-0.29990593	8.87219620	-2.66082425		1.00000000	34.34000000	304.67121751	0.000000
2	-0.29013246	8.87944600	-2.57621551		2.00000000	17.17000000	152.46008782	0.061794
3	-0.28000024	8.86121370	-2.48114196		3.00000000	11.44666667	101.43135949	0.083218
4	-0.27021188	8.86753370	-2.39611295		4.00000000	8.58500000	76.12777681	0.104742
5	-0.25999704	8.87113000	-2.30646754		5.00000000	6.86800000	60.92692084	0.126147
6	-0.24984697	8.87574100	-2.21757700		6.00000000	5.72333333	50.79882432	0.147508
7	-0.24004596	8.87142370	-2.12954942		7.00000000	4.90571429	43.52066998	0.168885
8	-0.22988917	8.86759850	-2.03856486		8.00000000	4.29250000	38.06416656	0.190369
9	-0.22004426	8.87165550	-1.95215687		9.00000000	3.81555556	33.85029443	0.211740
10	-0.20993288	8.87411210	-1.86296791		10.00000000	3.43400000	30.47370095	0.233097
11	-0.20009764	8.87332440	-1.77553127		11.00000000	3.12181818	27.70090545	0.254464
12	-0.18996021	8.87356000	-1.68562332		12.00000000	2.86166667	25.39317087	0.275941
13	-0.18015623	8.86142920	-1.59644168		13.00000000	2.64153846	23.40780606	0.297335
14	-0.16999647	8.87667370	-1.50900319		14.00000000	2.45285714	21.77321249	0.318696
15	-0.16017760	8.86864850	-1.42055883		15.00000000	2.28933333	20.30329263	0.340059
16	-0.15006027	8.86910250	-1.33089992		16.00000000	2.14625000	19.03531124	0.361534
17	-0.13988636	8.87307740	-1.24122250		17.00000000	2.02000000	17.92361635	0.382908
18	-0.13009802	8.86683560	-1.15355776		18.00000000	1.90777778	16.91595192	0.404292
19	-0.11990253	8.86933610	-1.06345584		19.00000000	1.80736842	16.03015798	0.425646
20	-0.11007920	8.87291720	-0.97672363		20.00000000	1.71700000	15.23479883	0.447122
21	-0.09992614	8.86811450	-0.88615642		21.00000000	1.63523810	14.50147866	0.468513
22	-0.09010429	8.86447810	-0.79872750		22.00000000	1.56090909	13.83664445	0.489893
23	-0.07996909	8.89436050	-0.71127394		23.00000000	1.49304348	13.27966694	0.511377
24	-0.07014651	8.87087150	-0.62226067		24.00000000	1.43083333	12.69273864	0.532773
25	-0.06000461	8.87351990	-0.53245211		25.00000000	1.37360000	12.18866693	0.554111
26	-0.04986644	8.87385850	-0.44250771		26.00000000	1.32076923	11.72031927	0.575479
27	-0.04003194	8.87633510	-0.35533691		27.00000000	1.27185185	11.28938323	0.596967
28	-0.02987367	8.86933230	-0.26495952		28.00000000	1.22642857	10.87760254	0.618345
29	-0.02006746	8.87591080	-0.17811694		29.00000000	1.18413793	10.51030265	0.639682
30	-0.00991663	8.86350150	-0.08789605		30.00000000	1.14466667	10.14575472	0.661060
31	-0.00069469	8.87674050	-0.00616662		31.00000000	1.10774194	9.83313770	0.682655
32	0.00946262	8.86939910	0.08392780		32.00000000	1.07312500	9.51797391	0.704029
33	0.01929014	8.87078760	0.17111877		33.00000000	1.04060606	9.23099534	0.725382
34	0.02941240	8.87682250	0.26108864		34.00000000	1.01000000	8.96559073	0.746754
35	0.03923769	8.87048050	0.34805713		35.00000000	0.98114286	8.70320858	0.768229
36	0.04937929	8.87156200	0.43807142		36.00000000	0.95388889	8.46248442	0.789608
37	0.05919714	8.86616040	0.52485129		37.00000000	0.92810811	8.22875536	0.810951
38	0.06934693	8.87216760	0.61525756		38.00000000	0.90368421	8.01763777	0.832331
39	0.07950342	8.86575790	0.70485805		39.00000000	0.88051282	7.80641349	0.853811
40	0.08932275	8.88144970	0.79331554		40.00000000	0.85850000	7.62472457	0.875180
41	0.09943757	8.85653400	0.88067218		41.00000000	0.83756098	7.41788726	0.896545
42	0.10929709	8.87468430	0.96997717		42.00000000	0.81761905	7.25611093	0.917918
43	0.11942901	8.86988350	1.05932141		43.00000000	0.79860465	7.08353022	0.939392
44	0.12926175	8.88427350	1.14839674		44.00000000	0.78045455	6.93377164	0.960776
45	0.13941228	8.86442090	1.23580913		45.00000000	0.76311111	6.76453808	0.982142
46	0.14924128	8.87254140	1.32414944		46.00000000	0.74652174	6.62354504	1.003493
47	0.15938960	8.86279870	1.41263794		47.00000000	0.73063830	6.47550016	1.024970
48	0.16953418	8.88416390	1.50616944		48.00000000	0.71541667	6.35587892	1.046343
49	0.17934681	8.86166100	1.58931063		49.00000000	0.70081633	6.21039671	1.067718
50	0.18948619	8.87147050	1.68102114		50.00000000	0.68680000	6.09292594	1.089069
51	0.19927873	8.87213800	1.76802839		51.00000000	0.67333333	5.97390625	1.110547
52	0.20941438	8.86252500	1.85594018		52.00000000	0.66038462	5.85267516	1.131937
53	0.21925008	8.86106490	1.94278919		53.00000000	0.64792453	5.74130130	1.153326
54	0.22939838	8.86415770	2.03342342		54.00000000	0.63592593	5.63694769	1.174798
55	0.23923409	8.86298080	2.12032715		55.00000000	0.62436364	5.53372292	1.196191
56	0.24938165	8.87433720	2.21309685		56.00000000	0.61321429	5.44187035	1.217536
57	0.25952029	8.87015530	2.30198528		57.00000000	0.60245614	5.34387953	1.238908
58	0.26935598	8.86536220	2.38793832		58.00000000	0.59206897	5.24890583	1.260398
59	0.27947304	8.86173060	2.47661479		59.00000000	0.58203390	5.15782761	1.281787
60	0.28931394	8.85235500	2.56110970		60.00000000	0.57233333	5.06649785	1.303132
61	0.29945779	8.88624760	2.66105607		61.00000000	0.56295082	5.00252037	1.324506
62	0.30929646	8.87006380	2.74347933		62.00000000	0.55387097	4.91287082	1.345987
63	0.31942990	8.86257360	2.83097100		63.00000000	0.54507937	4.83080599	1.367376
64	0.32924402	8.86898710	2.92006097		64.00000000	0.53656250	4.75876589	1.388724
65	0.33941466	8.87108140	3.01097508		65.00000000	0.52830769	4.68666054	1.410103
66	0.34920719	8.87474440	3.09912455		66.00000000	0.52030303	4.61755640	1.431575
67	0.35937634	8.87565230	3.18969944		67.00000000	0.51253731	4.54910298	1.452947
68	0.36951792	8.86827950	3.27698819		68.00000000	0.50500000	4.47848115	1.474289
69	0.37932834	8.86481190	3.36267438		69.00000000	0.49768116	4.41184986	1.495670
70	0.38947961	8.86949920	3.45448909		70.00000000	0.49057143	4.35112289	1.517150
71	0.39928854	8.86436080	3.53943768		71.00000000	0.48366197	4.28735422	1.538524
72	0.40945098	8.85593510	3.62607131		72.00000000	0.47694444	4.22378905	1.559874
73	0.41926956	8.85010240	3.71057854		73.00000000	0.47041096	4.16318516	1.581280
74	0.42942306	8.85266880	3.80154013		74.00000000	0.46405405	4.10811685	1.602755
75	0.43922082	8.83603100	3.88096878		75.00000000	0.45786667	4.04572406	1.624129
76	0.44938624	8.87842750	3.98984315		76.00000000	0.45184211	4.01164737	1.645492
77	0.45954052	8.83692840	4.06092667		77.00000000	0.44597403	3.94104054	1.666899
78	0.46939853	8.83401780	4.14667497		78.00000000	0.44025641	3.88923296	1.688378
79	0.47952825	8.83385750	4.23608423		79.00000000	0.43468354	3.83993249	1.709754
80	0.48934683	8.83267970	4.32224381		80.00000000	0.42925000	3.79142776	1.731145
81	0.49948397	8.79084490	4.39088611		81.00000000	0.42395062	3.72688412	1.752485
82	0.50930703	8.76782990	4.46551741		82.00000000	0.41878049	3.67179608	1.773951
83	0.51942855	8.72330190	4.53113206		83.00000000	0.41373494	3.60913479	1.795345
84	0.52921587	8.67546460	4.59119355		84.00000000	0.40880952	3.54661255	1.816732
85	0.53937757	8.57605080	4.62572944		85.00000000	0.40400000	3.46472452	1.838220
86	0.54949909	8.44886020	4.64264099		86.00000000	0.39930233	3.37364953	1.859611
87	0.55932361	8.29139420	4.63757254		87.00000000	0.39471264	3.27271812	1.880959
88	0.56944138	8.04636100	4.58193091		88.00000000	0.39022727	3.13990951	1.902338
89	0.57926220	7.70649530	4.46408142		89.00000000	0.38584270	2.97349493	1.923824
90	0.58937705	7.26140880	4.27970770		90.00000000	0.38155556	2.77063087	1.945196
91	0.59915841	6.68171500	4.00340574		91.00000000	0.37736264	2.52142959	1.966535
92	0.60926431	5.92704580	3.61113747		92.00000000	0.37326087	2.21233427	1.988015
93	0.61908585	4.99316600	3.09119842		93.00000000	0.36924731	1.84371312	2.009517
94	0.62919545	3.79967210	2.39073640		94.00000000	0.36531915	1.38809298	2.030907
95	0.63931471	2.38607650	1.52545381		95.00000000	0.36147368	0.86250386	2.052257
96	0.64907151	0.74500370	0.48356068		96.00000000	0.35770833	0.26649403	2.073633
97	0.65912980	-1.22772410	-0.80922954		97.00000000	0.35402062	-0.43463965	2.095150
98	0.66890371	-3.42119740	-2.28845163		98.00000000	0.35040816	-1.19881550	2.116522
99	0.67896938	-6.07062720	-4.12176999		99.00000000	0.34686869	-2.10571049	2.137861
100	0.68893981	-9.04114340	-6.22880362		100.00000000	0.34340000	-3.10472864	2.159243
101	0.69177032	-10.00049600	-6.91804632		101.00000000	0.34000000	-3.40016864	2.180717
13:04 02/04/2018
Test Lot:	JK-PERC
Recipe:	Recipe_YJX-LID
Cell Name:	1-5-30min
Test Order:	4
Test Condition:	Light
1	-0.29991412	8.87264160	-2.66103050		1.00000000	34.34000000	304.68651254	0.000000
2	-0.29007158	8.87790680	-2.57522845		2.00000000	17.17000000	152.43365976	0.061801
3	-0.27996406	8.86459260	-2.48176733		3.00000000	11.44666667	101.47003663	0.083220
4	-0.27007538	8.88522340	-2.39968009		4.00000000	8.58500000	76.27964289	0.104717
5	-0.25997084	8.88120940	-2.30885547		5.00000000	6.86800000	60.99614616	0.126152
6	-0.24980380	8.87867450	-2.21792663		6.00000000	5.72333333	50.81561372	0.147526
7	-0.23995680	8.87648870	-2.12997382		7.00000000	4.90571429	43.54551742	0.168909
8	-0.22982398	8.86649040	-2.03773211		8.00000000	4.29250000	38.05941004	0.190398
9	-0.21999708	8.87236980	-1.95189545		9.00000000	3.81555556	33.85301988	0.211778
10	-0.20985086	8.87607960	-1.86265294		10.00000000	3.43400000	30.48045735	0.233124
11	-0.20002022	8.87463760	-1.77510697		11.00000000	3.12181818	27.70500502	0.254497
12	-0.18989784	8.88085750	-1.68645566		12.00000000	2.86166667	25.41405388	0.275976
13	-0.18006869	8.86826900	-1.59689758		13.00000000	2.64153846	23.42587365	0.297360
14	-0.16996342	8.88189220	-1.50959677		14.00000000	2.45285714	21.78601272	0.318708
15	-0.16012162	8.87047580	-1.42035496		15.00000000	2.28933333	20.30747593	0.340084
16	-0.14999178	8.87474630	-1.33113899		16.00000000	2.14625000	19.04742425	0.361566
17	-0.13983068	8.88003640	-1.24170153		17.00000000	2.02000000	17.93767353	0.382938
18	-0.13000602	8.87851240	-1.15426006		18.00000000	1.90777778	16.93822866	0.404300
19	-0.11988064	8.86612130	-1.06287630		19.00000000	1.80736842	16.02434765	0.425678
20	-0.11007680	8.87321380	-0.97673498		20.00000000	1.71700000	15.23530809	0.447155
21	-0.09992463	8.87111470	-0.88644286		21.00000000	1.63523810	14.50638470	0.468534
22	-0.09006572	8.87398820	-0.79924212		22.00000000	1.56090909	13.85148885	0.489900
23	-0.07992323	8.87476630	-0.70929996		23.00000000	1.49304348	13.25041195	0.511252
24	-0.07012237	8.86784360	-0.62183420		24.00000000	1.43083333	12.68840622	0.532729
25	-0.05999253	8.88117790	-0.53280436		25.00000000	1.37360000	12.19918596	0.554109
26	-0.04981357	8.86810210	-0.44175184		26.00000000	1.32076923	11.71271639	0.575493
27	-0.03999336	8.87185570	-0.35481533		27.00000000	1.27185185	11.28368610	0.596890
28	-0.02987469	8.86263370	-0.26476840		28.00000000	1.22642857	10.86938719	0.618347
29	-0.02002917	8.87318230	-0.17772247		29.00000000	1.18413793	10.50707173	0.639730
30	-0.00989710	8.86783500	-0.08776584		30.00000000	1.14466667	10.15071513	0.661090
31	-0.00064627	8.86699100	-0.00573049		31.00000000	1.10774194	9.82233777	0.682576
32	0.00952801	8.87543200	0.08456524		32.00000000	1.07312500	9.52444797	0.704069
33	0.01933008	8.88058850	0.17166250		33.00000000	1.04060606	9.24119421	0.725450
34	0.02945591	8.87250800	0.26134780		34.00000000	1.01000000	8.96123308	0.746823
35	0.03931380	8.87500670	0.34891025		35.00000000	0.98114286	8.70764943	0.768185
36	0.04943144	8.85850140	0.43788847		36.00000000	0.95388889	8.45002606	0.789665
37	0.05927147	8.87551400	0.52606473		37.00000000	0.92810811	8.23743651	0.811039
38	0.06941664	8.86626340	0.61546623		38.00000000	0.90368421	8.01230224	0.832421
39	0.07956033	8.86261840	0.70511286		39.00000000	0.88051282	7.80364912	0.853767
40	0.08938994	8.88524820	0.79425183		40.00000000	0.85850000	7.62798558	0.875245
41	0.09950386	8.86239150	0.88184216		41.00000000	0.83756098	7.42279327	0.896617
42	0.10935728	8.87120630	0.97013099		42.00000000	0.81761905	7.25326725	0.917993
43	0.11949056	8.86339760	1.05909234		43.00000000	0.79860465	7.07835055	0.939467
44	0.12932612	8.87939360	1.14833752		44.00000000	0.78045455	6.92996310	0.960841
45	0.13943408	8.87767120	1.23784992		45.00000000	0.76311111	6.77464953	0.982188
46	0.14927709	8.86714460	1.32366154		46.00000000	0.74652174	6.61951621	1.003570
47	0.15942077	8.87556080	1.41494874		47.00000000	0.73063830	6.48482464	1.025048
48	0.16958232	8.86476420	1.50330728		48.00000000	0.71541667	6.34200005	1.046427
49	0.17940226	8.87614630	1.59240071		49.00000000	0.70081633	6.22054824	1.067776
50	0.18955563	8.87838080	1.68294707		50.00000000	0.68680000	6.09767193	1.089142
51	0.19931155	8.87308690	1.76850870		51.00000000	0.67333333	5.97454518	1.110620
52	0.20945151	8.86721130	1.85725080		52.00000000	0.66038462	5.85576992	1.131988
53	0.21928634	8.86604790	1.94420319		53.00000000	0.64792453	5.74452990	1.153329
54	0.22942927	8.87565230	2.03633443		54.00000000	0.63592593	5.64425741	1.174714
55	0.23925442	8.87591930	2.12360292		55.00000000	0.62436364	5.54180125	1.196205
56	0.24939737	8.87519170	2.21344947		56.00000000	0.61321429	5.44239434	1.217582
57	0.25953957	8.86744500	2.30145286		57.00000000	0.60245614	5.34224669	1.238944
58	0.26937363	8.86356450	2.38761054		58.00000000	0.59206897	5.24784146	1.260320
59	0.27950841	8.87395480	2.48034500		59.00000000	0.58203390	5.16494251	1.281790
60	0.28932759	8.87665180	2.56826027		60.00000000	0.57233333	5.08040371	1.303183
61	0.29948914	8.86688900	2.65553696		61.00000000	0.56295082	4.99162243	1.324529
62	0.30930832	8.86325450	2.74147836		62.00000000	0.55387097	4.90909935	1.345938
63	0.31945127	8.86534690	2.83204633		63.00000000	0.54507937	4.83231766	1.367427
64	0.32928386	8.87789820	2.92334859		64.00000000	0.53656250	4.76354725	1.388804
65	0.33943051	8.86251160	3.00820683		65.00000000	0.52830769	4.68213305	1.410174
66	0.34925121	8.86403850	3.09577617		66.00000000	0.52030303	4.61198609	1.431542
67	0.35935619	8.86203580	3.18462742		67.00000000	0.51253731	4.54212402	1.453013
68	0.36954081	8.87249660	3.27874958		68.00000000	0.50500000	4.48061078	1.474395
69	0.37939870	8.86921020	3.36496682		69.00000000	0.49768116	4.41403882	1.495774
70	0.38952303	8.84768200	3.44637590		70.00000000	0.49057143	4.34042000	1.517104
71	0.39935711	8.87802030	3.54550053		71.00000000	0.48366197	4.29396080	1.538569
72	0.40945762	8.86971760	3.63177346		72.00000000	0.47694444	4.23036253	1.559944
73	0.41931179	8.86349770	3.71656909		73.00000000	0.47041096	4.16948645	1.581326
74	0.42946294	8.86535550	3.80734164		74.00000000	0.46405405	4.11400416	1.602811
75	0.43927094	8.85004520	3.88756767		75.00000000	0.45786667	4.05214070	1.624206
76	0.44942358	8.85693450	3.98051521		76.00000000	0.45184211	4.00193593	1.645554
77	0.45956728	8.85189440	4.06804103		77.00000000	0.44597403	3.94771498	1.666939
78	0.46945417	8.84358310	4.15165696		78.00000000	0.44025641	3.89344415	1.688422
79	0.47955918	8.82011890	4.22976899		79.00000000	0.43468354	3.83396054	1.709807
80	0.48935455	8.81264400	4.31250744		80.00000000	0.42925000	3.78282744	1.731147
81	0.49953693	8.80502890	4.39843711		81.00000000	0.42395062	3.73289744	1.752516
82	0.50934345	8.76659870	4.46520963		82.00000000	0.41878049	3.67128048	1.773994
83	0.51945812	8.71487520	4.52701269		83.00000000	0.41373494	3.60564837	1.795380
84	0.52926022	8.66218090	4.58454777		84.00000000	0.40880952	3.54118205	1.816725
85	0.53939420	8.57895470	4.62743841		85.00000000	0.40400000	3.46589770	1.838102
86	0.54954386	8.44196610	4.63923064		86.00000000	0.39930233	3.37089670	1.859578
87	0.55934739	8.30329320	4.64442538		87.00000000	0.39471264	3.27741481	1.880952
88	0.56945312	8.03962710	4.57819074		88.00000000	0.39022727	3.13728176	1.902311
89	0.57928872	7.72136120	4.47289745		89.00000000	0.38584270	2.97923083	1.923688
90	0.58939070	7.26337860	4.28096780		90.00000000	0.38155556	2.77138246	1.945166
91	0.59918755	6.69067480	4.00896904		91.00000000	0.37736264	2.52481069	1.966554
92	0.60928512	5.93209600	3.61433782		92.00000000	0.37326087	2.21421931	1.988015
93	0.61910284	4.99288270	3.09110786		93.00000000	0.36924731	1.84360852	2.009418
94	0.62922049	3.81945540	2.40327960		94.00000000	0.36531915	1.39532020	2.030905
95	0.63933808	2.39341470	1.53020116		95.00000000	0.36147368	0.86515643	2.052278
96	0.64907545	0.74658793	0.48459190		96.00000000	0.35770833	0.26706072	2.073652
97	0.65915287	-1.22825930	-0.80961064		97.00000000	0.35402062	-0.43482912	2.095012
98	0.66892147	-3.44034050	-2.30131762		98.00000000	0.35040816	-1.20552340	2.116521
99	0.67902792	-6.11571220	-4.15273933		99.00000000	0.34686869	-2.12134906	2.137910
100	0.68897140	-9.11692520	-6.28130072		100.00000000	0.34340000	-3.13075211	2.159301
101	0.69160908	-9.99984460	-6.91598332		101.00000000	0.34000000	-3.39994716	2.180656
