# Supplementary material for: Study on the Electrical Injection Regeneration of Industrialized B-Doped Czochralski Silicon PERC Solar Cells
Source: Hindawi journal article supplement (doi:10.1155/2019/5357370), 2019-06-20
Supplement: f1 [file 5357370.f1.zip › section3.2/IVRawData_1-5-40min.csv]

13:31 02/04/2018
Test Lot:	JK-PERC
Recipe:	Recipe_YJX-LID
Cell Name:	1-5-40min
Test Order:	2
Test Condition:	Light
1	-0.29988709	8.86522010	-2.65856506		1.00000000	34.34000000	304.43165823	0.000000
2	-0.29010910	8.87996960	-2.57615999		2.00000000	17.17000000	152.46907803	0.061730
3	-0.27998126	8.87574770	-2.48504302		3.00000000	11.44666667	101.59772534	0.083262
4	-0.27017424	8.87796880	-2.39859847		4.00000000	8.58500000	76.21736215	0.104663
5	-0.25998539	8.86693570	-2.30527374		5.00000000	6.86800000	60.89811439	0.126077
6	-0.24984938	8.87579250	-2.21761125		6.00000000	5.72333333	50.79911908	0.147475
7	-0.24005128	8.86519050	-2.12810033		7.00000000	4.90571429	43.49009168	0.168971
8	-0.22987881	8.88009640	-2.04134599		8.00000000	4.29250000	38.11781380	0.190350
9	-0.22004573	8.87250140	-1.95235605		9.00000000	3.81555556	33.85352201	0.211717
10	-0.20990005	8.86334130	-1.86041578		10.00000000	3.43400000	30.43671402	0.233091
11	-0.20009154	8.87969110	-1.77675107		11.00000000	3.12181818	27.72078112	0.254569
12	-0.18993245	8.87258820	-1.68519241		12.00000000	2.86166667	25.39038990	0.275952
13	-0.18016934	8.87703230	-1.59936905		13.00000000	2.64153846	23.44902224	0.297300
14	-0.16999538	8.87775520	-1.50917737		14.00000000	2.45285714	21.77586525	0.318676
15	-0.16019356	8.86509320	-1.42013084		15.00000000	2.28933333	20.29515337	0.340158
16	-0.15004267	8.86661530	-1.33037063		16.00000000	2.14625000	19.02997309	0.361527
17	-0.13988806	8.86381820	-1.23994233		17.00000000	2.02000000	17.90491276	0.382886
18	-0.13008699	8.87191390	-1.15412057		18.00000000	1.90777778	16.92564018	0.404259
19	-0.11989590	8.87932870	-1.06459511		19.00000000	1.80736842	16.04821829	0.425738
20	-0.11006580	8.86928080	-0.97620449		20.00000000	1.71700000	15.22855513	0.447125
21	-0.09990374	8.86332130	-0.88547895		21.00000000	1.63523810	14.49364064	0.468475
22	-0.09008853	8.87199880	-0.79926534		22.00000000	1.56090909	13.84838358	0.489855
23	-0.07995178	8.86120990	-0.70846949		23.00000000	1.49304348	13.23017165	0.511345
24	-0.07012019	8.87059400	-0.62200776		24.00000000	1.43083333	12.69234158	0.532723
25	-0.06002066	8.87062550	-0.53242075		25.00000000	1.37360000	12.18469119	0.554065
26	-0.04985637	8.87016010	-0.44223394		26.00000000	1.32076923	11.71543453	0.575445
27	-0.04003892	8.87919710	-0.35551347		27.00000000	1.27185185	11.29302327	0.596922
28	-0.02985379	8.87426380	-0.26493038		28.00000000	1.22642857	10.88365067	0.618309
29	-0.02004304	8.86214640	-0.17762437		29.00000000	1.18413793	10.49400370	0.639688
30	-0.00989066	8.87242790	-0.08775416		30.00000000	1.14466667	10.15597247	0.661037
31	-0.00067611	8.86800380	-0.00599571		31.00000000	1.10774194	9.82345969	0.682617
32	0.00948277	8.87162400	0.08412756		32.00000000	1.07312500	9.52036151	0.703996
33	0.01930440	8.86969760	0.17122417		33.00000000	1.04060606	9.22986108	0.725372
34	0.02946096	8.85966780	0.26101431		34.00000000	1.01000000	8.94826448	0.746791
35	0.03922900	8.87416170	0.34812447		35.00000000	0.98114286	8.70682037	0.768271
36	0.04940268	8.87318420	0.43835905		36.00000000	0.95388889	8.46403182	0.789655
37	0.05921686	8.87142370	0.52533789		37.00000000	0.92810811	8.23364027	0.811066
38	0.06936226	8.87463570	0.61556479		38.00000000	0.90368421	8.01986816	0.832433
39	0.07948979	8.87362770	0.70536280		39.00000000	0.88051282	7.81334295	0.853920
40	0.08933077	8.86724660	0.79211797		40.00000000	0.85850000	7.61253121	0.875313
41	0.09947617	8.88131140	0.88347881		41.00000000	0.83756098	7.43863984	0.896680
42	0.10930301	8.88098050	0.97071790		42.00000000	0.81761905	7.26125882	0.918043
43	0.11941715	8.87450600	1.05976821		43.00000000	0.79860465	7.08722177	0.939519
44	0.12926705	8.86740970	1.14626389		44.00000000	0.78045455	6.92061021	0.960900
45	0.13942659	8.87954430	1.23804458		45.00000000	0.76311111	6.77607892	0.982284
46	0.14924525	8.86836430	1.32356125		46.00000000	0.74652174	6.62042674	1.003624
47	0.15940255	8.87925720	1.41537624		47.00000000	0.73063830	6.48752537	1.025094
48	0.16953902	8.86040880	1.50218502		48.00000000	0.71541667	6.33888413	1.046474
49	0.17937180	8.87125680	1.59125330		49.00000000	0.70081633	6.21712160	1.067880
50	0.18951496	8.87122630	1.68123010		50.00000000	0.68680000	6.09275822	1.089357
51	0.19928598	8.86178780	1.76603007		51.00000000	0.67333333	5.96693712	1.110743
52	0.20944403	8.86876010	1.85750886		52.00000000	0.66038462	5.85679273	1.132096
53	0.21925747	8.86668210	1.94408628		53.00000000	0.64792453	5.74494082	1.153466
54	0.22941776	8.85297780	2.03103034		54.00000000	0.63592593	5.62983810	1.174949
55	0.23925725	8.88156130	2.12497793		55.00000000	0.62436364	5.54532391	1.196342
56	0.24938850	8.85724160	2.20889420		56.00000000	0.61321429	5.43138708	1.217700
57	0.25953242	8.87377830	2.30303316		57.00000000	0.60245614	5.34606222	1.239072
58	0.26936892	8.87118150	2.38962058		58.00000000	0.59206897	5.25235125	1.260552
59	0.27949795	8.87543680	2.48066639		59.00000000	0.58203390	5.16580508	1.281936
60	0.28933522	8.85874560	2.56314711		60.00000000	0.57233333	5.07015540	1.303280
61	0.29945976	8.88038350	2.65931751		61.00000000	0.56295082	4.99921917	1.324651
62	0.30928436	8.86741160	2.74255172		62.00000000	0.55387097	4.91140184	1.346134
63	0.31944317	8.87164880	2.83398762		63.00000000	0.54507937	4.83575270	1.367522
64	0.32924768	8.85885910	2.91675881		64.00000000	0.53656250	4.75333159	1.388867
65	0.33941391	8.87052920	3.01078100		65.00000000	0.52830769	4.68636881	1.410240
66	0.34922588	8.86610130	3.09627203		66.00000000	0.52030303	4.61305937	1.431729
67	0.35936606	8.85591510	3.18251532		67.00000000	0.51253731	4.53898693	1.453105
68	0.36950997	8.87852570	3.28070377		68.00000000	0.50500000	4.48365548	1.474472
69	0.37934425	8.85528090	3.35919989		69.00000000	0.49768116	4.40710647	1.495853
70	0.38947847	8.86794190	3.45387244		70.00000000	0.49057143	4.35035893	1.517324
71	0.39930680	8.86669920	3.54053328		71.00000000	0.48366197	4.28848522	1.538699
72	0.40942690	8.86297230	3.62873927		72.00000000	0.47694444	4.22714540	1.560061
73	0.41927233	8.85451790	3.71245435		73.00000000	0.47041096	4.16526226	1.581443
74	0.42943558	8.85104370	3.80095308		74.00000000	0.46405405	4.10736271	1.602932
75	0.43922821	8.85082340	3.88753132		75.00000000	0.45786667	4.05249701	1.624319
76	0.44936764	8.85137750	3.97752262		76.00000000	0.45184211	3.99942504	1.645719
77	0.45954803	8.83467860	4.05995915		77.00000000	0.44597403	3.94003718	1.667125
78	0.46939570	8.84440520	4.15152577		78.00000000	0.44025641	3.89380608	1.688616
79	0.47952101	8.82653330	4.23250816		79.00000000	0.43468354	3.83674878	1.710010
80	0.48934114	8.80827810	4.31025285		80.00000000	0.42925000	3.78095337	1.731390
81	0.49947238	8.79188540	4.39130393		81.00000000	0.42395062	3.72732524	1.752872
82	0.50929326	8.76072600	4.46177870		82.00000000	0.41878049	3.66882111	1.774257
83	0.51944536	8.71171090	4.52525780		83.00000000	0.41373494	3.60433918	1.795601
84	0.52924693	8.66325090	4.58499894		84.00000000	0.40880952	3.54161948	1.817021
85	0.53938711	8.56350800	4.61904583		85.00000000	0.40400000	3.45965723	1.838501
86	0.54950720	8.44909950	4.64284101		86.00000000	0.39930233	3.37374508	1.859877
87	0.55931687	8.27817730	4.63012422		87.00000000	0.39471264	3.26750125	1.881237
88	0.56945711	8.03730960	4.57690310		88.00000000	0.39022727	3.13637741	1.902606
89	0.57926011	7.70964960	4.46589248		89.00000000	0.38584270	2.97471199	1.924082
90	0.58938092	7.26667310	4.28283848		90.00000000	0.38155556	2.77263949	1.945461
91	0.59918249	6.69013880	4.00861402		91.00000000	0.37736264	2.52460842	1.966821
92	0.60928249	5.92693040	3.61117491		92.00000000	0.37326087	2.21229119	1.988290
93	0.61911672	4.99750190	3.09403698		93.00000000	0.36924731	1.84531414	2.009801
94	0.62919813	3.80357430	2.39320184		94.00000000	0.36531915	1.38951853	2.031191
95	0.63933384	2.38318060	1.52364800		95.00000000	0.36147368	0.86145707	2.052535
96	0.64908552	0.72363317	0.46969981		96.00000000	0.35770833	0.25884962	2.073919
97	0.65915352	-1.26562150	-0.83423887		97.00000000	0.35402062	-0.44805611	2.095408
98	0.66892976	-3.49870800	-2.34038990		98.00000000	0.35040816	-1.22597584	2.116834
99	0.67900664	-6.20629450	-4.21411518		99.00000000	0.34686869	-2.15276922	2.138197
100	0.68892729	-9.24081130	-6.36624709		100.00000000	0.34340000	-3.17329460	2.159573
101	0.69112366	-10.00050200	-6.91158354		101.00000000	0.34000000	-3.40017068	2.181053
13:32 02/04/2018
Test Lot:	JK-PERC
Recipe:	Recipe_YJX-LID
Cell Name:	1-5-40min
Test Order:	3
Test Condition:	Light
1	-0.29988730	8.87436290	-2.66130873		1.00000000	34.34000000	304.74562199	0.000000
2	-0.29004842	8.87741850	-2.57488121		2.00000000	17.17000000	152.42527565	0.061724
3	-0.27990139	8.86927600	-2.48252268		3.00000000	11.44666667	101.52364595	0.083092
4	-0.27008706	8.87743660	-2.39768075		4.00000000	8.58500000	76.21279321	0.104584
5	-0.25991920	8.87197110	-2.30599563		5.00000000	6.86800000	60.93269751	0.125974
6	-0.24975801	8.86980530	-2.21530492		6.00000000	5.72333333	50.76485233	0.147356
7	-0.23993996	8.85988040	-2.12583935		7.00000000	4.90571429	43.46404185	0.168711
8	-0.22980186	8.85922430	-2.03586622		8.00000000	4.29250000	38.02822031	0.190202
9	-0.21995628	8.88060760	-1.95334541		9.00000000	3.81555556	33.88445166	0.211571
10	-0.20985465	8.86372090	-1.86009305		10.00000000	3.43400000	30.43801757	0.233017
11	-0.20004180	8.87905600	-1.77618234		11.00000000	3.12181818	27.71879846	0.254428
12	-0.18990445	8.86417100	-1.68334552		12.00000000	2.86166667	25.36630268	0.275898
13	-0.18008268	8.86778260	-1.59693406		13.00000000	2.64153846	23.42458881	0.297280
14	-0.16995649	8.86314300	-1.50634867		14.00000000	2.45285714	21.74002362	0.318650
15	-0.16014886	8.87699790	-1.42164109		15.00000000	2.28933333	20.32240719	0.340010
16	-0.14999439	8.87118050	-1.33062731		16.00000000	2.14625000	19.03977115	0.361498
17	-0.13982949	8.86652760	-1.23980203		17.00000000	2.02000000	17.91038575	0.382880
18	-0.13005163	8.88004490	-1.15486431		18.00000000	1.90777778	16.94115233	0.404233
19	-0.11990163	8.85088350	-1.06123536		19.00000000	1.80736842	15.99680734	0.425604
20	-0.11007465	8.88434600	-0.97794128		20.00000000	1.71700000	15.25442208	0.447105
21	-0.09987403	8.87191300	-0.88607368		21.00000000	1.63523810	14.50769012	0.468490
22	-0.09008203	8.85756400	-0.79790732		22.00000000	1.56090909	13.82585217	0.489875
23	-0.07991713	8.87495040	-0.70926059		23.00000000	1.49304348	13.25068681	0.511218
24	-0.07011322	8.86929800	-0.62185503		24.00000000	1.43083333	12.69048722	0.532685
25	-0.05993567	8.87560460	-0.53196534		25.00000000	1.37360000	12.19153048	0.554057
26	-0.04979385	8.86895560	-0.44161948		26.00000000	1.32076923	11.71384367	0.575435
27	-0.03997655	8.87127400	-0.35464291		27.00000000	1.27185185	11.28294627	0.596920
28	-0.02985334	8.86177830	-0.26455365		28.00000000	1.22642857	10.86833810	0.618290
29	-0.02003231	8.86922260	-0.17767101		29.00000000	1.18413793	10.50238290	0.639625
30	-0.00989123	8.86255070	-0.08766156		30.00000000	1.14466667	10.14466637	0.661003
31	-0.00065225	8.86566450	-0.00578261		31.00000000	1.10774194	9.82086835	0.682590
32	0.00950872	8.87097640	0.08435159		32.00000000	1.07312500	9.51966655	0.703967
33	0.01929076	8.86491390	0.17101094		33.00000000	1.04060606	9.22488313	0.725327
34	0.02947769	8.86118410	0.26120726		34.00000000	1.01000000	8.94979594	0.746701
35	0.03931184	8.87125870	0.34874548		35.00000000	0.98114286	8.70397211	0.768181
36	0.04945039	8.86038300	0.43814939		36.00000000	0.95388889	8.45182090	0.789557
37	0.05926519	8.86822510	0.52557700		37.00000000	0.92810811	8.23067162	0.810909
38	0.06942532	8.87236690	0.61596693		38.00000000	0.90368421	8.01781788	0.832288
39	0.07954601	8.86728860	0.70535745		39.00000000	0.88051282	7.80776130	0.853764
40	0.08939281	8.87206840	0.79309913		40.00000000	0.85850000	7.61667072	0.875139
41	0.09953137	8.86762050	0.88260639		41.00000000	0.83756098	7.42717288	0.896494
42	0.10934914	8.86035250	0.96887193		42.00000000	0.81761905	7.24439297	0.917867
43	0.11952044	8.87270550	1.06046967		43.00000000	0.79860465	7.08578388	0.939349
44	0.12931886	8.86370370	1.14624406		44.00000000	0.78045455	6.91771784	0.960734
45	0.13948421	8.87376880	1.23775063		45.00000000	0.76311111	6.77167157	0.982102
46	0.14930421	8.86692330	1.32386898		46.00000000	0.74652174	6.61935100	1.003471
47	0.15944722	8.87242030	1.41468275		47.00000000	0.73063830	6.48253007	1.024959
48	0.16960514	8.86425300	1.50342287		48.00000000	0.71541667	6.34163433	1.046338
49	0.17940727	8.87054920	1.59144102		49.00000000	0.70081633	6.21662570	1.067713
50	0.18953317	8.85781290	1.67884936		50.00000000	0.68680000	6.08354590	1.089080
51	0.19929290	8.87340830	1.76840727		51.00000000	0.67333333	5.97476159	1.110558
52	0.20946568	8.85815330	1.85547910		52.00000000	0.66038462	5.84978816	1.131948
53	0.21928643	8.86021230	1.94292432		53.00000000	0.64792453	5.74074888	1.153331
54	0.22941829	8.85943790	2.03251709		54.00000000	0.63592593	5.63394625	1.174664
55	0.23929262	8.86923600	2.12234272		55.00000000	0.62436364	5.53762844	1.196137
56	0.24938130	8.85855390	2.20915769		56.00000000	0.61321429	5.43219180	1.217508
57	0.25956601	8.88755040	2.30690600		57.00000000	0.60245614	5.35435931	1.238881
58	0.26936814	8.86916730	2.38907110		58.00000000	0.59206897	5.25115871	1.260361
59	0.27952158	8.86604020	2.47824957		59.00000000	0.58203390	5.16033594	1.281736
60	0.28934905	8.86038780	2.56374479		60.00000000	0.57233333	5.07109528	1.303080
61	0.29948685	8.85709000	2.65258198		61.00000000	0.56295082	4.98610608	1.324471
62	0.30930981	8.86207490	2.74112670		62.00000000	0.55387097	4.90844600	1.345951
63	0.31944242	8.86521240	2.83192490		63.00000000	0.54507937	4.83224435	1.367341
64	0.32926020	8.86715510	2.91960126		64.00000000	0.53656250	4.75778291	1.388692
65	0.33940768	8.86931130	3.01031237		65.00000000	0.52830769	4.68572539	1.410057
66	0.34923512	8.86263940	3.09514493		66.00000000	0.52030303	4.61125814	1.431535
67	0.35942429	8.85962870	3.18436576		67.00000000	0.51253731	4.54089029	1.452916
68	0.36956879	8.85827160	3.27374072		68.00000000	0.50500000	4.47342716	1.474266
69	0.37938359	8.86501690	3.36324194		69.00000000	0.49768116	4.41195189	1.495642
70	0.38952810	8.86791420	3.45430177		70.00000000	0.49057143	4.35034534	1.517121
71	0.39932206	8.85501770	3.53600391		71.00000000	0.48366197	4.28283532	1.538491
72	0.40949261	8.85828880	3.62740380		72.00000000	0.47694444	4.22491163	1.559851
73	0.41933495	8.85515790	3.71327720		73.00000000	0.47041096	4.16556332	1.581221
74	0.42946234	8.85599520	3.80331642		74.00000000	0.46405405	4.10966048	1.602699
75	0.43929276	8.85863690	3.89153505		75.00000000	0.45786667	4.05607455	1.624093
76	0.44945365	8.84298320	3.97451108		76.00000000	0.45184211	3.99563215	1.645442
77	0.45955646	8.84393790	4.06428879		77.00000000	0.44597403	3.94416659	1.666818
78	0.46943080	8.83508780	4.14746233		78.00000000	0.44025641	3.88970404	1.688299
79	0.47954479	8.81887340	4.22904479		79.00000000	0.43468354	3.83341915	1.709669
80	0.48940426	8.80512520	4.30926578		80.00000000	0.42925000	3.77959999	1.731050
81	0.49952644	8.78709030	4.38938394		81.00000000	0.42395062	3.72529236	1.752410
82	0.50935310	8.77331070	4.46871300		82.00000000	0.41878049	3.67409133	1.773874
83	0.51950431	8.71079640	4.52529627		83.00000000	0.41373494	3.60396082	1.795247
84	0.52924991	8.66067600	4.58366199		84.00000000	0.40880952	3.54056683	1.816631
85	0.53937876	8.56664090	4.62066415		85.00000000	0.40400000	3.46092292	1.837972
86	0.54952699	8.44683740	4.64176513		86.00000000	0.39930233	3.37284182	1.859431
87	0.55934852	8.27332970	4.62767472		87.00000000	0.39471264	3.26558784	1.880800
88	0.56946397	8.03954510	4.57823127		88.00000000	0.39022727	3.13724976	1.902178
89	0.57928026	7.71420000	4.46868378		89.00000000	0.38584270	2.97646773	1.923658
90	0.58936894	7.26533560	4.28196314		90.00000000	0.38155556	2.77212916	1.945053
91	0.59919345	6.70533800	4.01779461		91.00000000	0.37736264	2.53034403	1.966460
92	0.60928810	5.94726660	3.62359877		92.00000000	0.37326087	2.21988190	1.987936
93	0.61911178	4.99180220	3.09048355		93.00000000	0.36924731	1.84320954	2.009429
94	0.62921685	3.82372780	2.40595396		94.00000000	0.36531915	1.39688099	2.030830
95	0.63933605	2.38928320	1.52755488		95.00000000	0.36147368	0.86366300	2.052179
96	0.64904964	0.72860891	0.47290335		96.00000000	0.35770833	0.26062948	2.073553
97	0.65916139	-1.26966300	-0.83691283		97.00000000	0.35402062	-0.44948688	2.095040
98	0.66888982	-3.51154660	-2.34883777		98.00000000	0.35040816	-1.23047459	2.116411
99	0.67897707	-6.23126980	-4.23088931		99.00000000	0.34686869	-2.16143237	2.137750
100	0.68896079	-9.30795760	-6.41281782		100.00000000	0.34340000	-3.19635264	2.159123
101	0.69099563	-9.99992750	-6.90990620		101.00000000	0.34000000	-3.39997535	2.180590
13:32 02/04/2018
Test Lot:	JK-PERC
Recipe:	Recipe_YJX-LID
Cell Name:	1-5-40min
Test Order:	4
Test Condition:	Light
1	-0.29985780	8.86685940	-2.65879695		1.00000000	34.34000000	304.48795180	0.000000
2	-0.29004708	8.84566690	-2.56565985		2.00000000	17.17000000	151.88010067	0.061753
3	-0.27994606	8.88144680	-2.48632604		3.00000000	11.44666667	101.66296104	0.083275
4	-0.27010703	8.86866860	-2.39548974		4.00000000	8.58500000	76.13751993	0.104829
5	-0.25995168	8.86684130	-2.30495029		5.00000000	6.86800000	60.89746605	0.126190
6	-0.24979931	8.86759190	-2.21511834		6.00000000	5.72333333	50.75218431	0.147576
7	-0.23998708	8.87007710	-2.12870390		7.00000000	4.90571429	43.51406394	0.169075
8	-0.22982354	8.86251540	-2.03681466		8.00000000	4.29250000	38.04234735	0.190456
9	-0.22001950	8.87911890	-1.95357930		9.00000000	3.81555556	33.87877145	0.211802
10	-0.20987979	8.85838320	-1.85919561		10.00000000	3.43400000	30.41968791	0.233181
11	-0.20003332	8.87712290	-1.77572037		11.00000000	3.12181818	27.71276367	0.254658
12	-0.18989211	8.84973530	-1.68049491		12.00000000	2.86166667	25.32499252	0.276048
13	-0.18009923	8.89471910	-1.60193206		13.00000000	2.64153846	23.49574261	0.297395
14	-0.16995355	8.86146930	-1.50603817		14.00000000	2.45285714	21.73591827	0.318771
15	-0.16013984	8.86657710	-1.41989224		15.00000000	2.28933333	20.29855051	0.340250
16	-0.15000087	8.87456420	-1.33119235		16.00000000	2.14625000	19.04703341	0.361621
17	-0.13986337	8.87819770	-1.24173465		17.00000000	2.02000000	17.93395935	0.382956
18	-0.12999459	8.86354830	-1.15221333		18.00000000	1.90777778	16.90968048	0.404332
19	-0.11984667	8.87330820	-1.06343644		19.00000000	1.80736842	16.03733703	0.425803
20	-0.11003966	8.86883740	-0.97592385		20.00000000	1.71700000	15.22779382	0.447189
21	-0.09985751	8.86683750	-0.88542031		21.00000000	1.63523810	14.49939046	0.468548
22	-0.09007208	8.86212640	-0.79823016		22.00000000	1.56090909	13.83297366	0.489915
23	-0.07988993	8.86999990	-0.70862368		23.00000000	1.49304348	13.24329550	0.511403
24	-0.07009185	8.86569120	-0.62141271		24.00000000	1.43083333	12.68532649	0.532782
25	-0.05995362	8.86236190	-0.53133067		25.00000000	1.37360000	12.17334031	0.554145
26	-0.04979231	8.87732320	-0.44202245		26.00000000	1.32076923	11.72489533	0.575518
27	-0.03997636	8.86257740	-0.35429360		27.00000000	1.27185185	11.27188548	0.596997
28	-0.02981580	8.87060070	-0.26448406		28.00000000	1.22642857	10.87915814	0.618369
29	-0.02000283	8.86728000	-0.17737070		29.00000000	1.18413793	10.50008259	0.639759
30	-0.00988395	8.86466310	-0.08761789		30.00000000	1.14466667	10.14708436	0.661103
31	-0.00065452	8.86593340	-0.00580292		31.00000000	1.10774194	9.82116622	0.682682
32	0.00947234	8.87125210	0.08403154		32.00000000	1.07312500	9.51996241	0.704080
33	0.01934383	8.85960010	0.17137862		33.00000000	1.04060606	9.21935356	0.725465
34	0.02945722	8.87141510	0.26132718		34.00000000	1.01000000	8.96012925	0.746939
35	0.03928107	8.87592120	0.34865568		35.00000000	0.98114286	8.70854669	0.768328
36	0.04941604	8.86938950	0.43829006		36.00000000	0.95388889	8.46041210	0.789669
37	0.05922724	8.87362290	0.52556016		37.00000000	0.92810811	8.23568136	0.811046
38	0.06940165	8.86736680	0.61540990		38.00000000	0.90368421	8.01329937	0.832548
39	0.07955150	8.87404350	0.70594350		39.00000000	0.88051282	7.81370907	0.853926
40	0.08934708	8.86642070	0.79218879		40.00000000	0.85850000	7.61182217	0.875300
41	0.09950139	8.87636180	0.88321037		41.00000000	0.83756098	7.43449425	0.896687
42	0.10931557	8.85849000	0.96837088		42.00000000	0.81761905	7.24287016	0.918166
43	0.11946914	8.87659360	1.06047900		43.00000000	0.79860465	7.08888894	0.939568
44	0.12933765	8.86825940	1.14699983		44.00000000	0.78045455	6.92127336	0.960912
45	0.13944286	8.87640860	1.23775180		45.00000000	0.76311111	6.77368603	0.982266
46	0.14925554	8.86338520	1.32290934		46.00000000	0.74652174	6.61670973	1.003761
47	0.15942028	8.87355330	1.41462435		47.00000000	0.73063830	6.48335788	1.025134
48	0.16955152	8.86364360	1.50284425		48.00000000	0.71541667	6.34119836	1.046478
49	0.17937538	8.86586280	1.59031751		49.00000000	0.70081633	6.21334140	1.067846
50	0.18951258	8.86712650	1.68043202		50.00000000	0.68680000	6.08994248	1.089314
51	0.19930965	8.87245370	1.76836564		51.00000000	0.67333333	5.97411882	1.110703
52	0.20946322	8.86427310	1.85673919		52.00000000	0.66038462	5.85382958	1.132061
53	0.21929377	8.85721020	1.94233102		53.00000000	0.64792453	5.73880374	1.153433
54	0.22945181	8.86901090	2.03501060		54.00000000	0.63592593	5.64003397	1.174914
55	0.23929130	8.85920620	2.11993097		55.00000000	0.62436364	5.53136620	1.196309
56	0.24940914	8.87250520	2.21288389		56.00000000	0.61321429	5.44074694	1.217674
57	0.25956273	8.86228850	2.30031980		57.00000000	0.60245614	5.33914012	1.239043
58	0.26935309	8.87441920	2.39035223		58.00000000	0.59206897	5.25426820	1.260521
59	0.27953643	8.86029430	2.47677504		59.00000000	0.58203390	5.15699163	1.281895
60	0.28936550	8.86502550	2.56523254		60.00000000	0.57233333	5.07374959	1.303284
61	0.29949376	8.85676100	2.65254465		61.00000000	0.56295082	4.98592086	1.324638
62	0.30932802	8.85786250	2.73998507		62.00000000	0.55387097	4.90611288	1.346116
63	0.31948459	8.86501030	2.83223418		63.00000000	0.54507937	4.83213419	1.367512
64	0.32926974	8.86691950	2.91960828		64.00000000	0.53656250	4.75765649	1.388889
65	0.33943596	8.86020570	3.00747243		65.00000000	0.52830769	4.68091483	1.410366
66	0.34925610	8.85168650	3.09150551		66.00000000	0.52030303	4.60555931	1.431745
67	0.35938585	8.86424640	3.18568473		67.00000000	0.51253731	4.54325704	1.453104
68	0.36955208	8.85048290	3.27071436		68.00000000	0.50500000	4.46949386	1.474476
69	0.37934765	8.85387900	3.35869819		69.00000000	0.49768116	4.40640877	1.495963
70	0.38950717	8.86762910	3.45400512		70.00000000	0.49057143	4.35020548	1.517334
71	0.39934516	8.86260220	3.53923729		71.00000000	0.48366197	4.28650366	1.538698
72	0.40948534	8.84995270	3.62392589		72.00000000	0.47694444	4.22093577	1.560069
73	0.41929656	8.85971160	3.71484660		73.00000000	0.47041096	4.16770543	1.581557
74	0.42946872	8.84717750	3.79958600		74.00000000	0.46405405	4.10556859	1.602947
75	0.43927622	8.84738730	3.88644685		75.00000000	0.45786667	4.05092373	1.624292
76	0.44941491	8.83839420	3.97210613		76.00000000	0.45184211	3.99355864	1.645665
77	0.45956549	8.84298320	4.06392991		77.00000000	0.44597403	3.94374082	1.667155
78	0.46943846	8.83200740	4.14608395		78.00000000	0.44025641	3.88834787	1.688540
79	0.47958535	8.81783870	4.22890626		79.00000000	0.43468354	3.83296938	1.709895
80	0.48939952	8.80646420	4.30987935		80.00000000	0.42925000	3.78017476	1.731274
81	0.49952856	8.79501910	4.39336323		81.00000000	0.42395062	3.72865378	1.752753
82	0.50933158	8.75066660	4.45699085		82.00000000	0.41878049	3.66460843	1.774129
83	0.51946133	8.71945290	4.52941860		83.00000000	0.41373494	3.60754232	1.795501
84	0.52926952	8.63849070	4.57208983		84.00000000	0.40880952	3.53149727	1.816872
85	0.53940600	8.56924060	4.62229980		85.00000000	0.40400000	3.46197320	1.838350
86	0.54954022	8.45020870	4.64372955		86.00000000	0.39930233	3.37418799	1.859732
87	0.55936033	8.27898600	4.63093634		87.00000000	0.39471264	3.26782045	1.881093
88	0.56948489	8.04347990	4.58064027		88.00000000	0.39022727	3.13878522	1.902473
89	0.57929981	7.70915790	4.46591371		89.00000000	0.38584270	2.97452227	1.923947
90	0.58941543	7.26764010	4.28365921		90.00000000	0.38155556	2.77300846	1.945323
91	0.59921771	6.69507930	4.01181009		91.00000000	0.37736264	2.52647278	1.966714
92	0.60930878	5.93916990	3.61878837		92.00000000	0.37326087	2.21685972	1.988179
93	0.61912739	4.98926260	3.08898913		93.00000000	0.36924731	1.84227180	2.009678
94	0.62920952	3.82949380	2.40955396		94.00000000	0.36531915	1.39898742	2.031077
95	0.63933855	2.37491440	1.51837433		95.00000000	0.36147368	0.85846906	2.052464
96	0.64909244	0.72545630	0.47088820		96.00000000	0.35770833	0.25950176	2.073952
97	0.65915519	-1.27398590	-0.83975442		97.00000000	0.35402062	-0.45101728	2.095333
98	0.66894704	-3.52642990	-2.35899484		98.00000000	0.35040816	-1.23568982	2.116745
99	0.67903292	-6.24910210	-4.24334605		99.00000000	0.34686869	-2.16761784	2.138137
100	0.68900412	-9.31739330	-6.41972237		100.00000000	0.34340000	-3.19959286	2.159628
101	0.69093925	-10.00032800	-6.90961913		101.00000000	0.34000000	-3.40011152	2.181001
