# Supplementary material for: Study on the Electrical Injection Regeneration of Industrialized B-Doped Czochralski Silicon PERC Solar Cells
Source: Hindawi journal article supplement (doi:10.1155/2019/5357370), 2019-06-20
Supplement: f1 [file 5357370.f1.zip › section3.2/IVRawData_1-5-50min.csv]

13:51 02/04/2018
Test Lot:	JK-PERC
Recipe:	Recipe_YJX-LID
Cell Name:	1-5-50min
Test Order:	2
Test Condition:	Light
1	-0.29990575	8.87299730	-2.66106291		1.00000000	34.34000000	304.69872728	0.000000
2	-0.29008713	8.87611960	-2.57484806		2.00000000	17.17000000	152.40297353	0.061804
3	-0.27993885	8.87619300	-2.48479126		3.00000000	11.44666667	101.60282254	0.083220
4	-0.27014777	8.87385850	-2.39725309		4.00000000	8.58500000	76.18207522	0.104708
5	-0.25994736	8.86986830	-2.30569885		5.00000000	6.86800000	60.91825548	0.126144
6	-0.24978788	8.87836270	-2.21770740		6.00000000	5.72333333	50.81382919	0.147509
7	-0.23998120	8.86718460	-2.12795760		7.00000000	4.90571429	43.49987417	0.168895
8	-0.22984032	8.87746810	-2.04040011		8.00000000	4.29250000	38.10653182	0.190381
9	-0.21998228	8.88602260	-1.95476751		9.00000000	3.81555556	33.90511290	0.211765
10	-0.20984663	8.86888310	-1.86110523		10.00000000	3.43400000	30.45574457	0.233142
11	-0.20000347	8.89194390	-1.77841964		11.00000000	3.12181818	27.75903214	0.254491
12	-0.18986781	8.87589740	-1.68524720		12.00000000	2.86166667	25.39985973	0.275975
13	-0.18008791	8.86964130	-1.59731516		13.00000000	2.64153846	23.42949863	0.297339
14	-0.16993961	8.87254330	-1.50779655		14.00000000	2.45285714	21.76308121	0.318727
15	-0.16011132	8.86787030	-1.41984642		15.00000000	2.28933333	20.30151107	0.340124
16	-0.14995483	8.87369630	-1.33065362		16.00000000	2.14625000	19.04517068	0.361571
17	-0.13981172	8.87142180	-1.24032874		17.00000000	2.02000000	17.92027204	0.382959
18	-0.13000727	8.87620160	-1.15397074		18.00000000	1.90777778	16.93382016	0.404337
19	-0.11984929	8.87233450	-1.06334299		19.00000000	1.80736842	16.03557720	0.425819
20	-0.11002548	8.88901520	-0.97801816		20.00000000	1.71700000	15.26243910	0.447202
21	-0.09988461	8.87382510	-0.88635853		21.00000000	1.63523810	14.51081685	0.468545
22	-0.09005336	8.85968970	-0.79784480		22.00000000	1.56090909	13.82917020	0.489926
23	-0.07991919	8.87373830	-0.70918197		23.00000000	1.49304348	13.24887710	0.511406
24	-0.07008496	8.87149720	-0.62175852		24.00000000	1.43083333	12.69363391	0.532773
25	-0.05995005	8.87750820	-0.53220702		25.00000000	1.37360000	12.19414526	0.554145
26	-0.04981662	8.87147050	-0.44194667		26.00000000	1.32076923	11.71716527	0.575526
27	-0.03997942	8.87428570	-0.35478877		27.00000000	1.27185185	11.28677670	0.597002
28	-0.02985790	8.88571930	-0.26530888		28.00000000	1.22642857	10.89770003	0.618398
29	-0.02002069	8.87027360	-0.17758903		29.00000000	1.18413793	10.50362743	0.639747
30	-0.00988950	8.87224100	-0.08774202		30.00000000	1.14466667	10.15575853	0.661114
31	-0.00062465	8.88059900	-0.00554728		31.00000000	1.10774194	9.83741192	0.682735
32	0.00953164	8.86932090	0.08453918		32.00000000	1.07312500	9.51788999	0.704120
33	0.01933805	8.88454720	0.17180979		33.00000000	1.04060606	9.24531366	0.725481
34	0.02948384	8.86187930	0.26128221		34.00000000	1.01000000	8.95049809	0.746863
35	0.03928280	8.86269380	0.34815145		35.00000000	0.98114286	8.69556872	0.768337
36	0.04944125	8.87134170	0.43861021		36.00000000	0.95388889	8.46227428	0.789723
37	0.05926701	8.86471270	0.52538499		37.00000000	0.92810811	8.22741173	0.811087
38	0.06941726	8.88428690	0.61672286		38.00000000	0.90368421	8.02858979	0.832458
39	0.07956380	8.86045740	0.70497163		39.00000000	0.88051282	7.80174634	0.853935
40	0.08938435	8.86901660	0.79275126		40.00000000	0.85850000	7.61405075	0.875311
41	0.09952865	8.87032510	0.88285146		41.00000000	0.83756098	7.42943814	0.896695
42	0.10938418	8.87099650	0.97034668		42.00000000	0.81761905	7.25309571	0.918051
43	0.11952550	8.87933920	1.06130746		43.00000000	0.79860465	7.09108158	0.939520
44	0.12932968	8.87664890	1.14801416		44.00000000	0.78045455	6.92782098	0.960896
45	0.13946952	8.86629300	1.23657763		45.00000000	0.76311111	6.76596670	0.982278
46	0.14930198	8.87207410	1.32461823		46.00000000	0.74652174	6.62319619	1.003661
47	0.15946041	8.87280370	1.41486092		47.00000000	0.73063830	6.48281019	1.025126
48	0.16958313	8.87456890	1.50497717		48.00000000	0.71541667	6.34901450	1.046496
49	0.17940964	8.88277150	1.59365484		49.00000000	0.70081633	6.22519129	1.067879
50	0.18957925	8.86823940	1.68123417		50.00000000	0.68680000	6.09070682	1.089365
51	0.19936630	8.86349960	1.76708312		51.00000000	0.67333333	5.96808973	1.110738
52	0.20946744	8.87885000	1.85982998		52.00000000	0.66038462	5.86345594	1.132085
53	0.21930584	8.86051560	1.94316282		53.00000000	0.64792453	5.74094539	1.153462
54	0.22946280	8.87096120	2.03555560		54.00000000	0.63592593	5.64127421	1.174940
55	0.23929526	8.86200620	2.12063608		55.00000000	0.62436364	5.53311442	1.196324
56	0.24944775	8.86892320	2.21233294		56.00000000	0.61321429	5.43855041	1.217688
57	0.25958312	8.87032510	2.30258666		57.00000000	0.60245614	5.34398182	1.239061
58	0.26940665	8.86943440	2.38948461		58.00000000	0.59206897	5.25131685	1.260531
59	0.27953309	8.85909180	2.47640931		59.00000000	0.58203390	5.15629174	1.281926
60	0.28934395	8.87223630	2.56712790		60.00000000	0.57233333	5.07787658	1.303276
61	0.29948753	8.87600610	2.65825314		61.00000000	0.56295082	4.99675491	1.324696
62	0.30932295	8.86896040	2.74337299		62.00000000	0.55387097	4.91225968	1.346187
63	0.31948736	8.86711790	2.83293209		63.00000000	0.54507937	4.83328300	1.367560
64	0.32930714	8.87129500	2.92138078		64.00000000	0.53656250	4.76000422	1.388927
65	0.33945072	8.87350460	3.01211753		65.00000000	0.52830769	4.68794074	1.410303
66	0.34926233	8.87683200	3.10034303		66.00000000	0.52030303	4.61864259	1.431779
67	0.35940886	8.86523340	3.18624343		67.00000000	0.51253731	4.54376291	1.453175
68	0.36957997	8.86611650	3.27673907		68.00000000	0.50500000	4.47738883	1.474525
69	0.37940052	8.86317730	3.36269408		69.00000000	0.49768116	4.41103635	1.495897
70	0.38952991	8.87781720	3.45817533		70.00000000	0.49057143	4.35520347	1.517372
71	0.39935941	8.86538510	3.54047496		71.00000000	0.48366197	4.28784964	1.538740
72	0.40951040	8.86260030	3.62932699		72.00000000	0.47694444	4.22696798	1.560149
73	0.41933319	8.86350150	3.71676036		73.00000000	0.47041096	4.16948824	1.581517
74	0.42948568	8.85611150	3.80357307		74.00000000	0.46405405	4.10971444	1.602996
75	0.43930995	8.85846810	3.89161318		75.00000000	0.45786667	4.05599726	1.624376
76	0.44945946	8.84968280	3.97757365		76.00000000	0.45184211	3.99865931	1.645771
77	0.45958814	8.84095760	4.06319926		77.00000000	0.44597403	3.94283745	1.667111
78	0.46945557	8.84384820	4.15179380		78.00000000	0.44025641	3.89356086	1.688582
79	0.47960135	8.81796550	4.22910816		79.00000000	0.43468354	3.83302450	1.709962
80	0.48939213	8.81636710	4.31466067		80.00000000	0.42925000	3.78442558	1.731337
81	0.49954909	8.79300980	4.39254004		81.00000000	0.42395062	3.72780193	1.752837
82	0.50937039	8.75792600	4.46102818		82.00000000	0.41878049	3.66764852	1.774212
83	0.51951766	8.70982070	4.52490567		83.00000000	0.41373494	3.60355714	1.795560
84	0.52928686	8.66026020	4.58376193		84.00000000	0.40880952	3.54039685	1.816943
85	0.53945422	8.56054120	4.61802008		85.00000000	0.40400000	3.45845864	1.838416
86	0.54958588	8.43542860	4.63599245		86.00000000	0.39930233	3.36828626	1.859799
87	0.55938262	8.25834750	4.61957606		87.00000000	0.39471264	3.25967417	1.881167
88	0.56952322	8.00958060	4.56164213		88.00000000	0.39022727	3.12555679	1.902544
89	0.57928646	7.69847680	4.45962337		89.00000000	0.38584270	2.97040105	1.924031
90	0.58941513	7.23646880	4.26528420		90.00000000	0.38155556	2.76111487	1.945412
91	0.59918654	6.65687270	3.98870852		91.00000000	0.37736264	2.51205504	1.966761
92	0.60930556	5.89330820	3.59082545		92.00000000	0.37326087	2.19974134	1.988232
93	0.61911643	4.96205140	3.07208755		93.00000000	0.36924731	1.83222414	2.009726
94	0.62922204	3.78064320	2.37886403		94.00000000	0.36531915	1.38114136	2.031105
95	0.63935143	2.35382990	1.50492451		95.00000000	0.36147368	0.85084757	2.052455
96	0.64911169	0.72756684	0.47227214		96.00000000	0.35770833	0.26025672	2.073835
97	0.65919942	-1.24368310	-0.81983518		97.00000000	0.35402062	-0.44028946	2.095311
98	0.66892099	-3.42661430	-2.29213423		98.00000000	0.35040816	-1.20071362	2.116755
99	0.67903703	-6.08043530	-4.12884073		99.00000000	0.34686869	-2.10911261	2.138116
100	0.68896323	-9.00757410	-6.20588735		100.00000000	0.34340000	-3.09320095	2.159494
101	0.69195372	-10.00010200	-6.91960778		101.00000000	0.34000000	-3.40003468	2.180988
13:51 02/04/2018
Test Lot:	JK-PERC
Recipe:	Recipe_YJX-LID
Cell Name:	1-5-50min
Test Order:	3
Test Condition:	Light
1	-0.29992276	8.87147050	-2.66075592		1.00000000	34.34000000	304.64629697	0.000000
2	-0.29007739	8.87591460	-2.57470214		2.00000000	17.17000000	152.39945368	0.061806
3	-0.27997446	8.87143990	-2.48377660		3.00000000	11.44666667	101.54841539	0.083227
4	-0.27015737	8.86643030	-2.39533149		4.00000000	8.58500000	76.11830413	0.104727
5	-0.25996590	8.87696550	-2.30770833		5.00000000	6.86800000	60.96699905	0.126092
6	-0.24984661	8.86672880	-2.21532213		6.00000000	5.72333333	50.74724450	0.147446
7	-0.24001759	8.87671180	-2.13056697		7.00000000	4.90571429	43.54661189	0.168817
8	-0.22980826	8.86721130	-2.03775840		8.00000000	4.29250000	38.06250451	0.190285
9	-0.21999189	8.88397310	-1.95440203		9.00000000	3.81555556	33.89729292	0.211723
10	-0.20985623	8.86848450	-1.86110672		10.00000000	3.43400000	30.45437577	0.233079
11	-0.20002201	8.86517520	-1.77323016		11.00000000	3.12181818	27.67546512	0.254483
12	-0.18989678	8.87311550	-1.68497606		12.00000000	2.86166667	25.39189886	0.275981
13	-0.18008934	8.86988830	-1.59737233		13.00000000	2.64153846	23.43015109	0.297361
14	-0.16995890	8.87300210	-1.50804568		14.00000000	2.45285714	21.76420658	0.318711
15	-0.16014180	8.87139030	-1.42068041		15.00000000	2.28933333	20.30956953	0.340092
16	-0.15001284	8.86501690	-1.32986636		16.00000000	2.14625000	19.02654252	0.361574
17	-0.13985485	8.88207240	-1.24220090		17.00000000	2.02000000	17.94178625	0.382947
18	-0.13002732	8.85420890	-1.15128905		18.00000000	1.90777778	16.89186298	0.404340
19	-0.11986860	8.87330250	-1.06363035		19.00000000	1.80736842	16.03732673	0.425677
20	-0.11007531	8.87011150	-0.97638027		20.00000000	1.71700000	15.22998145	0.447140
21	-0.09990913	8.87279510	-0.88647327		21.00000000	1.63523810	14.50913256	0.468526
22	-0.09006821	8.87285710	-0.79916239		22.00000000	1.56090909	13.84972331	0.489909
23	-0.07993330	8.87160870	-0.70913697		23.00000000	1.49304348	13.24569751	0.511305
24	-0.07013778	8.87187770	-0.62225384		24.00000000	1.43083333	12.69417834	0.532773
25	-0.05997980	8.87077240	-0.53206712		25.00000000	1.37360000	12.18489297	0.554133
26	-0.04985382	8.87560750	-0.44248291		26.00000000	1.32076923	11.72262929	0.575523
27	-0.04001959	8.87188910	-0.35504940		27.00000000	1.27185185	11.28372858	0.597004
28	-0.02988245	8.86429210	-0.26488675		28.00000000	1.22642857	10.87142110	0.618377
29	-0.02005344	8.88681410	-0.17821115		29.00000000	1.18413793	10.52321366	0.639738
30	-0.00992522	8.86681080	-0.08800506		30.00000000	1.14466667	10.14954276	0.661121
31	-0.00066856	8.86971090	-0.00592996		31.00000000	1.10774194	9.82535072	0.682710
32	0.00949591	8.88248830	0.08434734		32.00000000	1.07312500	9.53202026	0.704091
33	0.01931497	8.85673710	0.17106762		33.00000000	1.04060606	9.21637430	0.725440
34	0.02943248	8.88075260	0.26138254		34.00000000	1.01000000	8.96956013	0.746827
35	0.03929247	8.88538840	0.34912882		35.00000000	0.98114286	8.71783536	0.768308
36	0.04943007	8.84866330	0.43739004		36.00000000	0.95388889	8.44064160	0.789707
37	0.05925508	8.86741640	0.52543945		37.00000000	0.92810811	8.22992106	0.811063
38	0.06938747	8.87499140	0.61581323		38.00000000	0.90368421	8.02018960	0.832434
39	0.07953177	8.86717410	0.70522209		39.00000000	0.88051282	7.80766048	0.853916
40	0.08938432	8.88294700	0.79399615		40.00000000	0.85850000	7.62601000	0.875306
41	0.09952787	8.86416910	0.88223190		41.00000000	0.83756098	7.42428212	0.896667
42	0.10935809	8.87670710	0.97073973		42.00000000	0.81761905	7.25776481	0.918035
43	0.11950016	8.87265680	1.06028391		43.00000000	0.79860465	7.08574499	0.939509
44	0.12931997	8.87969780	1.14832225		44.00000000	0.78045455	6.93020051	0.960902
45	0.13948660	8.87015530	1.23726780		45.00000000	0.76311111	6.76891407	0.982239
46	0.14929448	8.86406230	1.32335557		46.00000000	0.74652174	6.61721520	1.003624
47	0.15944771	8.88219260	1.41624527		47.00000000	0.73063830	6.48967008	1.025099
48	0.16958383	8.87340260	1.50478560		48.00000000	0.71541667	6.34818011	1.046491
49	0.17940512	8.86165050	1.58982547		49.00000000	0.70081633	6.21038935	1.067878
50	0.18956132	8.87368970	1.68210833		50.00000000	0.68680000	6.09445009	1.089213
51	0.19932829	8.87173560	1.76838789		51.00000000	0.67333333	5.97363530	1.110681
52	0.20945770	8.87395860	1.85871896		52.00000000	0.66038462	5.86022574	1.132050
53	0.21929833	8.86777500	1.94468825		53.00000000	0.64792453	5.74564893	1.153433
54	0.22945975	8.87635990	2.03676732		54.00000000	0.63592593	5.64470739	1.174822
55	0.23928402	8.85683250	2.11929849		55.00000000	0.62436364	5.52988415	1.196295
56	0.24941194	8.87065410	2.21244705		56.00000000	0.61321429	5.43961182	1.217666
57	0.25954136	8.87342450	2.30302066		57.00000000	0.60245614	5.34584908	1.239056
58	0.26937455	8.86441230	2.38784707		58.00000000	0.59206897	5.24834342	1.260545
59	0.27951664	8.87090780	2.47956634		59.00000000	0.58203390	5.16316905	1.281924
60	0.28932750	8.85504340	2.56200757		60.00000000	0.57233333	5.06803651	1.303285
61	0.29948521	8.87829400	2.65891774		61.00000000	0.56295082	4.99804288	1.324656
62	0.30930573	8.85901550	2.74014426		62.00000000	0.55387097	4.90675149	1.346131
63	0.31946567	8.86764340	2.83290764		63.00000000	0.54507937	4.83356943	1.367507
64	0.32928324	8.86508850	2.91912506		64.00000000	0.53656250	4.75667405	1.388846
65	0.33944169	8.86838910	3.01030098		65.00000000	0.52830769	4.68523818	1.410230
66	0.34922352	8.86187740	3.09477602		66.00000000	0.52030303	4.61086167	1.431702
67	0.35939312	8.87170410	3.18842942		67.00000000	0.51253731	4.54707938	1.453082
68	0.36955902	8.85989480	3.27425404		68.00000000	0.50500000	4.47424687	1.474442
69	0.37937063	8.85919380	3.36091793		69.00000000	0.49768116	4.40905384	1.495817
70	0.38952979	8.86391540	3.45275910		70.00000000	0.49057143	4.34838364	1.517293
71	0.39934438	8.86496830	3.54017527		71.00000000	0.48366197	4.28764805	1.538686
72	0.40950209	8.85107990	3.62453572		72.00000000	0.47694444	4.22147339	1.560034
73	0.41930404	8.86135860	3.71560346		73.00000000	0.47041096	4.16848020	1.581401
74	0.42948034	8.85620980	3.80356800		74.00000000	0.46405405	4.10976006	1.602886
75	0.43928376	8.86258030	3.89318760		75.00000000	0.45786667	4.05788010	1.624253
76	0.44944593	8.85004520	3.97761680		76.00000000	0.45184211	3.99882305	1.645613
77	0.45957163	8.84827610	4.06641667		77.00000000	0.44597403	3.94610132	1.666991
78	0.46943906	8.83597660	4.14795255		78.00000000	0.44025641	3.89009534	1.688465
79	0.47959304	8.83380220	4.23663005		79.00000000	0.43468354	3.83990845	1.709854
80	0.48938379	8.80259230	4.30784598		80.00000000	0.42925000	3.77851274	1.731217
81	0.49951991	8.79414080	4.39284842		81.00000000	0.42395062	3.72828142	1.752574
82	0.50932783	8.76248550	4.46297773		82.00000000	0.41878049	3.66955795	1.774049
83	0.51948923	8.73977090	4.54021686		83.00000000	0.41373494	3.61594859	1.795423
84	0.52925843	8.65075110	4.57848295		84.00000000	0.40880952	3.53650944	1.816799
85	0.53940046	8.57320690	4.62439175		85.00000000	0.40400000	3.46357559	1.838163
86	0.54954475	8.43804930	4.63708569		86.00000000	0.39930233	3.36933271	1.859639
87	0.55935937	8.26751330	4.62451103		87.00000000	0.39471264	3.26329203	1.881002
88	0.56948578	8.03544430	4.57607126		88.00000000	0.39022727	3.13564951	1.902387
89	0.57929593	7.70261670	4.46209450		89.00000000	0.38584270	2.97199840	1.923880
90	0.58941120	7.25032420	4.27342229		90.00000000	0.38155556	2.76640148	1.945265
91	0.59920347	6.67103240	3.99730576		91.00000000	0.37736264	2.51739838	1.966621
92	0.60927707	5.90657230	3.59873906		92.00000000	0.37326087	2.20469231	1.988090
93	0.61911029	4.97867970	3.08235183		93.00000000	0.36924731	1.83836410	2.009601
94	0.62922704	3.79148650	2.38570583		94.00000000	0.36531915	1.38510262	2.030980
95	0.63931477	2.36381290	1.51122050		95.00000000	0.36147368	0.85445616	2.052323
96	0.64909959	0.72975951	0.47368660		96.00000000	0.35770833	0.26104106	2.073708
97	0.65916198	-1.25509990	-0.82731414		97.00000000	0.35402062	-0.44433124	2.095186
98	0.66889322	-3.45704600	-2.31239463		98.00000000	0.35040816	-1.21137714	2.116554
99	0.67901373	-6.12705850	-4.16035685		99.00000000	0.34686869	-2.12528474	2.137906
100	0.68898684	-9.10948370	-6.27631439		100.00000000	0.34340000	-3.12819670	2.159286
101	0.69159323	-9.99997900	-6.91591778		101.00000000	0.34000000	-3.39999286	2.180764
13:52 02/04/2018
Test Lot:	JK-PERC
Recipe:	Recipe_YJX-LID
Cell Name:	1-5-50min
Test Order:	4
Test Condition:	Light
1	-0.29991141	8.86680890	-2.65925716		1.00000000	34.34000000	304.48621763	0.000000
2	-0.29010978	8.85958960	-2.57025359		2.00000000	17.17000000	152.11915343	0.061750
3	-0.27997321	8.87625790	-2.48511442		3.00000000	11.44666667	101.60356543	0.083277
4	-0.27018794	8.87979790	-2.39921430		4.00000000	8.58500000	76.23306497	0.104661
5	-0.26001862	8.86755370	-2.30572908		5.00000000	6.86800000	60.90235881	0.126033
6	-0.24988577	8.87517830	-2.21778076		6.00000000	5.72333333	50.79560380	0.147404
7	-0.24004246	8.88152310	-2.13194265		7.00000000	4.90571429	43.57021475	0.168892
8	-0.22988282	8.85472680	-2.03554957		8.00000000	4.29250000	38.00891479	0.190279
9	-0.22004843	8.87574100	-1.95309287		9.00000000	3.81555556	33.86588288	0.211636
10	-0.20994312	8.87032030	-1.86226272		10.00000000	3.43400000	30.46067991	0.233004
11	-0.20010129	8.87946410	-1.77679222		11.00000000	3.12181818	27.72007247	0.254486
12	-0.18994984	8.86677930	-1.68424331		12.00000000	2.86166667	25.37376676	0.275874
13	-0.18015862	8.87899490	-1.59962747		13.00000000	2.64153846	23.45420653	0.297228
14	-0.17002726	8.87191580	-1.50846753		14.00000000	2.45285714	21.76154204	0.318604
15	-0.16019659	8.86771200	-1.42057722		15.00000000	2.28933333	20.30114867	0.340088
16	-0.15004440	8.87194440	-1.33118557		16.00000000	2.14625000	19.04141067	0.361467
17	-0.13988921	8.87184430	-1.24107529		17.00000000	2.02000000	17.92112549	0.382813
18	-0.13009204	8.86649700	-1.15346068		18.00000000	1.90777778	16.91530594	0.404180
19	-0.11992422	8.88086610	-1.06503094		19.00000000	1.80736842	16.05099694	0.425647
20	-0.11012258	8.86743160	-0.97650445		20.00000000	1.71700000	15.22538006	0.447048
21	-0.09991977	8.88170050	-0.88745744		21.00000000	1.63523810	14.52369501	0.468430
22	-0.09013972	8.87163350	-0.79968653		22.00000000	1.56090909	13.84781338	0.489787
23	-0.07996072	8.87387850	-0.70956171		23.00000000	1.49304348	13.24908642	0.511274
24	-0.07014196	8.87799550	-0.62272004		24.00000000	1.43083333	12.70293189	0.532659
25	-0.05999348	8.86799050	-0.53202164		25.00000000	1.37360000	12.18107175	0.554050
26	-0.04984054	8.87085820	-0.44212836		26.00000000	1.32076923	11.71635656	0.575456
27	-0.04003667	8.84727000	-0.35421524		27.00000000	1.27185185	11.25241673	0.596932
28	-0.02988075	8.88318920	-0.26543635		28.00000000	1.22642857	10.89459704	0.618304
29	-0.02005529	8.86267380	-0.17774353		29.00000000	1.18413793	10.49462822	0.639672
30	-0.00991500	8.87394330	-0.08798517		30.00000000	1.14466667	10.15770710	0.661151
31	-0.00066787	8.86746310	-0.00592228		31.00000000	1.10774194	9.82286074	0.682653
32	0.00950645	8.87355610	0.08435606		32.00000000	1.07312500	9.52243489	0.704012
33	0.01931600	8.87555600	0.17144023		33.00000000	1.04060606	9.23595736	0.725398
34	0.02944484	8.86722660	0.26109405		34.00000000	1.01000000	8.95589887	0.746881
35	0.03926778	8.86601160	0.34814858		35.00000000	0.98114286	8.69882395	0.768267
36	0.04942267	8.87558940	0.43865529		36.00000000	0.95388889	8.46632611	0.789633
37	0.05922402	8.86760040	0.52517498		37.00000000	0.92810811	8.23009183	0.811005
38	0.06936477	8.86846450	0.61515901		38.00000000	0.90368421	8.01429134	0.832538
39	0.07951520	8.87858300	0.70598227		39.00000000	0.88051282	7.81770616	0.853925
40	0.08934111	8.87008000	0.79246280		40.00000000	0.85850000	7.61496368	0.875270
41	0.09949600	8.86331650	0.88186454		41.00000000	0.83756098	7.42356801	0.896640
42	0.10931596	8.87409690	0.97008042		42.00000000	0.81761905	7.25563066	0.918115
43	0.11944778	8.86004070	1.05831219		43.00000000	0.79860465	7.07566971	0.939486
44	0.12924691	8.86940100	1.14634267		44.00000000	0.78045455	6.92216433	0.960850
45	0.13942337	8.87219620	1.23699149		45.00000000	0.76311111	6.77047150	0.982229
46	0.14923887	8.86950970	1.32367561		46.00000000	0.74652174	6.62128181	1.003708
47	0.15938930	8.87232300	1.41415335		47.00000000	0.73063830	6.48245897	1.025106
48	0.16954567	8.86498360	1.50301958		48.00000000	0.71541667	6.34215702	1.046452
49	0.17937160	8.86972620	1.59097698		49.00000000	0.70081633	6.21604893	1.067829
50	0.18951531	8.87471100	1.68189361		50.00000000	0.68680000	6.09515151	1.089318
51	0.19928764	8.86220840	1.76612860		51.00000000	0.67333333	5.96722032	1.110685
52	0.20942765	8.85963820	1.85545321		52.00000000	0.66038462	5.85076877	1.132067
53	0.21925952	8.88008500	1.94704317		53.00000000	0.64792453	5.75362488	1.153425
54	0.22940324	8.86425400	2.03348859		54.00000000	0.63592593	5.63700893	1.174907
55	0.23925298	8.85935590	2.11962730		55.00000000	0.62436364	5.53145967	1.196285
56	0.24938183	8.87655540	2.21365163		56.00000000	0.61321429	5.44323058	1.217669
57	0.25952181	8.86332800	2.30022693		57.00000000	0.60245614	5.33976638	1.239061
58	0.26935518	8.87070940	2.38937153		58.00000000	0.59206897	5.25207174	1.260531
59	0.27952346	8.87477970	2.48070913		59.00000000	0.58203390	5.16542263	1.281901
60	0.28932706	8.86401560	2.56459957		60.00000000	0.57233333	5.07317160	1.303274
61	0.29948640	8.87412360	2.65767933		61.00000000	0.56295082	4.99569515	1.324750
62	0.30931380	8.87710290	2.74581043		62.00000000	0.55387097	4.91676957	1.346123
63	0.31945530	8.86730480	2.83270752		63.00000000	0.54507937	4.83338487	1.367473
64	0.32926410	8.87481500	2.92215797		64.00000000	0.53656250	4.76189292	1.388866
65	0.33941677	8.86522870	3.00900729		65.00000000	0.52830769	4.68356852	1.410337
66	0.34922037	8.87712960	3.10007448		66.00000000	0.52030303	4.61879743	1.431709
67	0.35938492	8.86273860	3.18513460		67.00000000	0.51253731	4.54248423	1.453079
68	0.36954576	8.86110690	3.27458448		68.00000000	0.50500000	4.47485898	1.474457
69	0.37935010	8.86142730	3.36158333		69.00000000	0.49768116	4.41016541	1.495935
70	0.38947743	8.87850760	3.45797832		70.00000000	0.49057143	4.35554216	1.517320
71	0.39931452	8.85403250	3.53554374		71.00000000	0.48366197	4.28235882	1.538664
72	0.40946048	8.86433790	3.62959605		72.00000000	0.47694444	4.22779672	1.560049
73	0.41927969	8.85378550	3.71221244		73.00000000	0.47041096	4.16491773	1.581533
74	0.42942864	8.86750030	3.80795859		74.00000000	0.46405405	4.11499946	1.602908
75	0.43924192	8.84909250	3.88689238		75.00000000	0.45786667	4.05170449	1.624264
76	0.44939232	8.84686660	3.97571391		76.00000000	0.45184211	3.99738683	1.645631
77	0.45954350	8.84578990	4.06502525		77.00000000	0.44597403	3.94499253	1.667104
78	0.46941331	8.82999420	4.14491680		78.00000000	0.44025641	3.88746155	1.688497
79	0.47956076	8.82535170	4.23229237		79.00000000	0.43468354	3.83623516	1.709851
80	0.48937106	8.81299880	4.31282656		80.00000000	0.42925000	3.78297973	1.731222
81	0.49950063	8.79358670	4.39240210		81.00000000	0.42395062	3.72804651	1.752716
82	0.50934142	8.76119900	4.46244154		82.00000000	0.41878049	3.66901919	1.774099
83	0.51945835	8.71955300	4.52944461		83.00000000	0.41373494	3.60758374	1.795507
84	0.52923816	8.65982820	4.58311154		84.00000000	0.40880952	3.54022024	1.816867
85	0.53937817	8.57188220	4.62348613		85.00000000	0.40400000	3.46304041	1.838332
86	0.54952115	8.43905160	4.63743734		86.00000000	0.39930233	3.36973293	1.859721
87	0.55932325	8.27617170	4.62905525		87.00000000	0.39471264	3.26670961	1.881106
88	0.56946844	8.03119370	4.57351135		88.00000000	0.39022727	3.13399081	1.902454
89	0.57927799	7.69538450	4.45776687		89.00000000	0.38584270	2.96920791	1.923926
90	0.58939344	7.25441550	4.27570491		90.00000000	0.38155556	2.76796254	1.945305
91	0.59920001	6.66347840	3.99275632		91.00000000	0.37736264	2.51454778	1.966672
92	0.60929829	5.90888740	3.60027499		92.00000000	0.37326087	2.20555645	1.988227
93	0.61909890	4.97744130	3.08152843		93.00000000	0.36924731	1.83790682	2.009662
94	0.62918162	3.79236910	2.38608893		94.00000000	0.36531915	1.38542505	2.031033
95	0.63932461	2.35655310	1.50660239		95.00000000	0.36147368	0.85183193	2.052425
96	0.64908427	0.72996664	0.47380986		96.00000000	0.35770833	0.26111515	2.073918
97	0.65916699	-1.24491570	-0.82060733		97.00000000	0.35402062	-0.44072583	2.095306
98	0.66891104	-3.45814040	-2.31318829		98.00000000	0.35040816	-1.21176063	2.116652
99	0.67901605	-6.11998180	-4.15556587		99.00000000	0.34686869	-2.12283005	2.138029
100	0.68895584	-9.09642120	-6.26703251		100.00000000	0.34340000	-3.12371104	2.159505
101	0.69165307	-10.00015100	-6.91663514		101.00000000	0.34000000	-3.40005134	2.180880
