# Supplementary material for: Study on the Electrical Injection Regeneration of Industrialized B-Doped Czochralski Silicon PERC Solar Cells
Source: Hindawi journal article supplement (doi:10.1155/2019/5357370), 2019-06-20
Supplement: f1 [file 5357370.f1.zip › section3.2/IVRawData_1-5-60min.csv]

14:13 02/04/2018
Test Lot:	JK-PERC
Recipe:	Recipe_YJX-LID
Cell Name:	1-5-60min
Test Order:	2
Test Condition:	Light
1	-0.29997227	8.87332920	-2.66175270		1.00000000	34.34000000	304.71012473	0.000000
2	-0.29012096	8.86203770	-2.57106289		2.00000000	17.17000000	152.16118731	0.061798
3	-0.28001434	8.88406470	-2.48766551		3.00000000	11.44666667	101.69292727	0.083215
4	-0.27018681	8.88313010	-2.40010458		4.00000000	8.58500000	76.26167191	0.104744
5	-0.26004967	8.87356760	-2.30756833		5.00000000	6.86800000	60.94366228	0.126169
6	-0.24986641	8.87464900	-2.21747669		6.00000000	5.72333333	50.79257444	0.147528
7	-0.24005303	8.88044830	-2.13177852		7.00000000	4.90571429	43.56494209	0.168903
8	-0.22990920	8.87294200	-2.03997100		8.00000000	4.29250000	38.08710354	0.190392
9	-0.22009136	8.88208200	-1.95486951		9.00000000	3.81555556	33.89007732	0.211773
10	-0.20995870	8.86476140	-1.86123378		10.00000000	3.43400000	30.44159065	0.233131
11	-0.20011407	8.87537860	-1.77608813		11.00000000	3.12181818	27.70731828	0.254499
12	-0.18996800	8.86750130	-1.68454149		12.00000000	2.86166667	25.37583289	0.275974
13	-0.18019482	8.87545010	-1.59931013		13.00000000	2.64153846	23.44484280	0.297356
14	-0.17007481	8.87671180	-1.50970507		14.00000000	2.45285714	21.77330594	0.318741
15	-0.16023166	8.86744790	-1.42084590		15.00000000	2.28933333	20.30054406	0.340116
16	-0.15006997	8.88264940	-1.33301893		16.00000000	2.14625000	19.06438627	0.361598
17	-0.13993061	8.87159820	-1.24140815		17.00000000	2.02000000	17.92062836	0.382979
18	-0.13010606	8.87676530	-1.15492096		18.00000000	1.90777778	16.93489558	0.404368
19	-0.11995032	8.87033840	-1.06399993		19.00000000	1.80736842	16.03196951	0.425736
20	-0.11012877	8.87075710	-0.97692557		20.00000000	1.71700000	15.23108994	0.447212
21	-0.09996410	8.88476090	-0.88815710		21.00000000	1.63523810	14.52869949	0.468591
22	-0.09011649	8.86316870	-0.79871762		22.00000000	1.56090909	13.83460060	0.489966
23	-0.08000615	8.87561890	-0.71010405		23.00000000	1.49304348	13.25168491	0.511445
24	-0.07015854	8.87600610	-0.62272764		24.00000000	1.43083333	12.70008539	0.532847
25	-0.06002364	8.87101940	-0.53247087		25.00000000	1.37360000	12.18523225	0.554201
26	-0.04987906	8.87134170	-0.44249418		26.00000000	1.32076923	11.71699515	0.575572
27	-0.04005750	8.87438200	-0.35548558		27.00000000	1.27185185	11.28689918	0.597061
28	-0.02993377	8.86790660	-0.26544984		28.00000000	1.22642857	10.87585402	0.618437
29	-0.02008541	8.87597750	-0.17827767		29.00000000	1.18413793	10.51038163	0.639802
30	-0.00996986	8.86046030	-0.08833758		30.00000000	1.14466667	10.14227356	0.661169
31	-0.00067675	8.87967780	-0.00600929		31.00000000	1.10774194	9.83639147	0.682758
32	0.00944976	8.86851600	0.08380535		32.00000000	1.07312500	9.51702623	0.704138
33	0.01931346	8.86798380	0.17127147		33.00000000	1.04060606	9.22807769	0.725484
34	0.02944956	8.88217740	0.26157623		34.00000000	1.01000000	8.97099917	0.746863
35	0.03925893	8.87674710	0.34849160		35.00000000	0.98114286	8.70935701	0.768341
36	0.04942332	8.86650850	0.43821224		36.00000000	0.95388889	8.45766394	0.789712
37	0.05920217	8.88187220	0.52582613		37.00000000	0.92810811	8.24333760	0.811059
38	0.06936953	8.86740300	0.61512760		38.00000000	0.90368421	8.01333208	0.832434
39	0.07952796	8.86255650	0.70482103		39.00000000	0.88051282	7.80359462	0.853913
40	0.08933286	8.87899680	0.79318621		40.00000000	0.85850000	7.62261875	0.875291
41	0.09946524	8.87307550	0.88256262		41.00000000	0.83756098	7.43174177	0.896643
42	0.10929843	8.87563900	0.97009341		42.00000000	0.81761905	7.25689151	0.918013
43	0.11944941	8.87481590	1.06009152		43.00000000	0.79860465	7.08746926	0.939491
44	0.12928334	8.86934850	1.14665900		44.00000000	0.78045455	6.92212335	0.960869
45	0.13943656	8.87714390	1.23779841		45.00000000	0.76311111	6.77424715	0.982230
46	0.14925486	8.87260820	1.32427989		46.00000000	0.74652174	6.62359490	1.003593
47	0.15940660	8.87267490	1.41436294		47.00000000	0.73063830	6.48271609	1.025068
48	0.16955461	8.86684230	1.50341399		48.00000000	0.71541667	6.34348676	1.046438
49	0.17936695	8.87537860	1.59194959		49.00000000	0.70081633	6.22001023	1.067826
50	0.18952613	8.86739920	1.68060385		50.00000000	0.68680000	6.09012977	1.089171
51	0.19930200	8.86672020	1.76715507		51.00000000	0.67333333	5.97025827	1.110646
52	0.20944183	8.88744930	1.86140365		52.00000000	0.66038462	5.86913479	1.132039
53	0.21926980	8.86830230	1.94455087		53.00000000	0.64792453	5.74599058	1.153418
54	0.22942227	8.87382600	2.03585330		54.00000000	0.63592593	5.64309602	1.174910
55	0.23924206	8.86197090	2.12015617		55.00000000	0.62436364	5.53309238	1.196296
56	0.24939305	8.87551020	2.21349056		56.00000000	0.61321429	5.44258965	1.217645
57	0.25953585	8.86771680	2.30149042		57.00000000	0.60245614	5.34241044	1.239019
58	0.26937351	8.87778190	2.39143927		58.00000000	0.59206897	5.25625915	1.260496
59	0.27952522	8.86160180	2.47704119		59.00000000	0.58203390	5.15775264	1.281867
60	0.28934726	8.86102960	2.56391464		60.00000000	0.57233333	5.07146261	1.303235
61	0.29948410	8.86893650	2.65610547		61.00000000	0.56295082	4.99277507	1.324618
62	0.30928826	8.86609940	2.74218046		62.00000000	0.55387097	4.91067505	1.346086
63	0.31944817	8.86095620	2.83061624		63.00000000	0.54507937	4.82992438	1.367482
64	0.32927912	8.86571880	2.91929608		64.00000000	0.53656250	4.75701224	1.388827
65	0.33941820	8.87272170	3.01156323		65.00000000	0.52830769	4.68752713	1.410200
66	0.34923950	8.86101910	3.09461788		66.00000000	0.52030303	4.61041509	1.431725
67	0.35938451	8.87753960	3.19045022		67.00000000	0.51253731	4.55007030	1.453115
68	0.36953774	8.86436750	3.27571833		68.00000000	0.50500000	4.47650559	1.474460
69	0.37935379	8.87526130	3.36686401		69.00000000	0.49768116	4.41705033	1.495848
70	0.38949808	8.85605810	3.44941763		70.00000000	0.49057143	4.34452907	1.517332
71	0.39929777	8.86356640	3.53920230		71.00000000	0.48366197	4.28697000	1.538715
72	0.40947556	8.85775660	3.62703484		72.00000000	0.47694444	4.22465780	1.560071
73	0.41930056	8.86251160	3.71605608		73.00000000	0.47041096	4.16902258	1.581443
74	0.42942998	8.86093620	3.80515166		74.00000000	0.46405405	4.11195337	1.602918
75	0.43923935	8.84894370	3.88680428		75.00000000	0.45786667	4.05163636	1.624298
76	0.44941115	8.85429570	3.97921921		76.00000000	0.45184211	4.00074361	1.645653
77	0.45954132	8.83770180	4.06128915		77.00000000	0.44597403	3.94138545	1.667018
78	0.46941468	8.84511470	4.15202669		78.00000000	0.44025641	3.89411845	1.688495
79	0.47955450	8.81995010	4.22964676		79.00000000	0.43468354	3.83388717	1.709881
80	0.48936760	8.81215290	4.31238212		80.00000000	0.42925000	3.78261663	1.731275
81	0.49950594	8.79351330	4.39241213		81.00000000	0.42395062	3.72801539	1.752616
82	0.50932574	8.75305650	4.45815698		82.00000000	0.41878049	3.66560927	1.774080
83	0.51945585	8.71629910	4.52773256		83.00000000	0.41373494	3.60623748	1.795460
84	0.52923697	8.65395360	4.57999218		84.00000000	0.40880952	3.53781865	1.816862
85	0.53935522	8.57598500	4.62550228		85.00000000	0.40400000	3.46469794	1.838336
86	0.54952180	8.43433570	4.63485134		86.00000000	0.39930233	3.36784986	1.859712
87	0.55934459	8.27046680	4.62604086		87.00000000	0.39471264	3.26445782	1.881065
88	0.56944424	8.03174400	4.57363036		88.00000000	0.39022727	3.13420556	1.902438
89	0.57927960	7.70565030	4.46372602		89.00000000	0.38584270	2.97316889	1.923912
90	0.58937854	7.26171400	4.27989840		90.00000000	0.38155556	2.77074732	1.945293
91	0.59918344	6.67774630	4.00119500		91.00000000	0.37736264	2.51993196	1.966660
92	0.60929573	5.90539310	3.59813080		92.00000000	0.37326087	2.20425216	1.988129
93	0.61908573	4.99154230	3.09019261		93.00000000	0.36924731	1.84311358	2.009635
94	0.62921739	3.79636030	2.38873592		94.00000000	0.36531915	1.38688311	2.031031
95	0.63929987	2.37046460	1.51543771		95.00000000	0.36147368	0.85686057	2.052383
96	0.64909136	0.72546464	0.47089283		96.00000000	0.35770833	0.25950475	2.073747
97	0.65915453	-1.25543590	-0.82752626		97.00000000	0.35402062	-0.44445019	2.095242
98	0.66887909	-3.46580480	-2.31820436		98.00000000	0.35040816	-1.21444629	2.116662
99	0.67899728	-6.14447780	-4.17208371		99.00000000	0.34686869	-2.13132695	2.138021
100	0.68895406	-9.15832710	-6.30966664		100.00000000	0.34340000	-3.14496953	2.159404
101	0.69147706	-10.00015300	-6.91487640		101.00000000	0.34000000	-3.40005202	2.180887
14:13 02/04/2018
Test Lot:	JK-PERC
Recipe:	Recipe_YJX-LID
Cell Name:	1-5-60min
Test Order:	3
Test Condition:	Light
1	-0.29996109	8.88006880	-2.66367512		1.00000000	34.34000000	304.94156259	0.000000
2	-0.29010901	8.87507060	-2.57473795		2.00000000	17.17000000	152.38496220	0.061784
3	-0.28001431	8.87325000	-2.48463698		3.00000000	11.44666667	101.56913500	0.083211
4	-0.27020392	8.87400250	-2.39779026		4.00000000	8.58500000	76.18331146	0.104713
5	-0.26005414	8.86721320	-2.30595550		5.00000000	6.86800000	60.90002026	0.126087
6	-0.24988574	8.87168120	-2.21690662		6.00000000	5.72333333	50.77558873	0.147449
7	-0.24007609	8.87956810	-2.13177199		7.00000000	4.90571429	43.56062408	0.168861
8	-0.22990620	8.86990070	-2.03924516		8.00000000	4.29250000	38.07404875	0.190363
9	-0.22007573	8.87561610	-1.95330769		9.00000000	3.81555556	33.86540632	0.211759
10	-0.20993190	8.85211660	-1.85834166		10.00000000	3.43400000	30.39816840	0.233120
11	-0.20012075	8.89615350	-1.78030491		11.00000000	3.12181818	27.77217374	0.254487
12	-0.18997394	8.86482520	-1.68408577		12.00000000	2.86166667	25.36817478	0.275966
13	-0.18020448	8.87739180	-1.59974577		13.00000000	2.64153846	23.44997188	0.297346
14	-0.17005618	8.86946490	-1.50830732		14.00000000	2.45285714	21.75553033	0.318734
15	-0.16025546	8.88588810	-1.42401208		15.00000000	2.28933333	20.34275982	0.340077
16	-0.15008113	8.86917780	-1.33109623		16.00000000	2.14625000	19.03547285	0.361556
17	-0.13997078	8.87470340	-1.24219916		17.00000000	2.02000000	17.92690087	0.382939
18	-0.13013136	8.86542800	-1.15367020		18.00000000	1.90777778	16.91326653	0.404344
19	-0.11996520	8.85985370	-1.06287412		19.00000000	1.80736842	16.01301979	0.425748
20	-0.11015109	8.88692760	-0.97890476		20.00000000	1.71700000	15.25885469	0.447215
21	-0.09997674	8.86645890	-0.88643967		21.00000000	1.63523810	14.49877136	0.468591
22	-0.09017156	8.86603360	-0.79946409		22.00000000	1.56090909	13.83907245	0.489950
23	-0.08004261	8.87291910	-0.71021159		23.00000000	1.49304348	13.24765400	0.511334
24	-0.07021808	8.87417790	-0.62312772		24.00000000	1.43083333	12.69746955	0.532826
25	-0.06007871	8.87864690	-0.53341765		25.00000000	1.37360000	12.19570938	0.554196
26	-0.04991255	8.86747070	-0.44259807		26.00000000	1.32076923	11.71188246	0.575563
27	-0.04007685	8.88207820	-0.35596573		27.00000000	1.27185185	11.29668761	0.596927
28	-0.02992186	8.86211870	-0.26517104		28.00000000	1.22642857	10.86875558	0.618398
29	-0.02009062	8.88179590	-0.17844081		29.00000000	1.18413793	10.51727142	0.639777
30	-0.00995795	8.85585020	-0.08818615		30.00000000	1.14466667	10.13699653	0.661163
31	-0.00065665	8.87031460	-0.00582470		31.00000000	1.10774194	9.82601946	0.682636
32	0.00948995	8.87290100	0.08420339		32.00000000	1.07312500	9.52173189	0.704114
33	0.01930602	8.87430760	0.17132753		33.00000000	1.04060606	9.23465827	0.725495
34	0.02944733	8.87877370	0.26145616		34.00000000	1.01000000	8.96756144	0.746880
35	0.03926861	8.87930970	0.34867811		35.00000000	0.98114286	8.71187129	0.768367
36	0.04943597	8.86956980	0.43847575		36.00000000	0.95388889	8.46058408	0.789738
37	0.05921035	8.86969850	0.52517798		37.00000000	0.92810811	8.23203909	0.811102
38	0.06935836	8.86678790	0.61498590		38.00000000	0.90368421	8.01277622	0.832482
39	0.07954433	8.87383080	0.70586291		39.00000000	0.88051282	7.81352179	0.853967
40	0.08931574	8.87301640	0.79250004		40.00000000	0.85850000	7.61748458	0.875353
41	0.09946524	8.86787610	0.88204539		41.00000000	0.83756098	7.42738696	0.896703
42	0.10931033	8.87311270	0.96992288		42.00000000	0.81761905	7.25482596	0.918087
43	0.11945461	8.86796280	1.05931904		43.00000000	0.79860465	7.08199634	0.939560
44	0.12928408	8.86033630	1.14550043		44.00000000	0.78045455	6.91508974	0.960934
45	0.13942614	8.87176610	1.23695610		45.00000000	0.76311111	6.77014329	0.982300
46	0.14923327	8.87037940	1.32375572		46.00000000	0.74652174	6.62193106	1.003681
47	0.15939839	8.86945630	1.41377705		47.00000000	0.73063830	6.48036445	1.025155
48	0.16954343	8.87082480	1.50399006		48.00000000	0.71541667	6.34633591	1.046539
49	0.17933717	8.87695790	1.59196851		49.00000000	0.70081633	6.22111703	1.067884
50	0.18949857	8.86814310	1.68050044		50.00000000	0.68680000	6.09064068	1.089252
51	0.19928487	8.87738510	1.76912854		51.00000000	0.67333333	5.97743930	1.110744
52	0.20943734	8.86701680	1.85708441		52.00000000	0.66038462	5.85564148	1.132116
53	0.21927425	8.87151720	1.94529528		53.00000000	0.64792453	5.74807360	1.153455
54	0.22937983	8.88028050	2.03695723		54.00000000	0.63592593	5.64720060	1.174837
55	0.23922791	8.86748700	2.12135038		55.00000000	0.62436364	5.53653643	1.196359
56	0.24937665	8.86528110	2.21079410		56.00000000	0.61321429	5.43631702	1.217798
57	0.25953287	8.87819000	2.30418213		57.00000000	0.60245614	5.34872008	1.239178
58	0.26934743	8.87207320	2.38967012		58.00000000	0.59206897	5.25287920	1.260538
59	0.27950659	8.87133030	2.47959528		59.00000000	0.58203390	5.16341496	1.282025
60	0.28932267	8.87171460	2.56678816		60.00000000	0.57233333	5.07757799	1.303405
61	0.29947218	8.87110520	2.65664921		61.00000000	0.56295082	4.99399594	1.324786
62	0.30928898	8.85862350	2.73987463		62.00000000	0.55387097	4.90653437	1.346156
63	0.31946677	8.88712500	2.83914112		63.00000000	0.54507937	4.84418845	1.367631
64	0.32925603	8.85851670	2.91672004		64.00000000	0.53656250	4.75314787	1.388997
65	0.33941668	8.86468980	3.00882358		65.00000000	0.52830769	4.68328381	1.410397
66	0.34924763	8.87017060	3.09788606		66.00000000	0.52030303	4.61517664	1.431866
67	0.35939640	8.86716370	3.18682671		67.00000000	0.51253731	4.54475226	1.453233
68	0.36956003	8.88109020	3.28209596		68.00000000	0.50500000	4.48495055	1.474595
69	0.37935379	8.85363200	3.35865885		69.00000000	0.49768116	4.40628584	1.495966
70	0.38952559	8.87522410	3.45712690		70.00000000	0.49057143	4.35393137	1.517441
71	0.39933571	8.85833360	3.53744894		71.00000000	0.48366197	4.28443910	1.538807
72	0.40948224	8.86957360	3.63193287		72.00000000	0.47694444	4.23029385	1.560153
73	0.41930053	8.86154080	3.71564875		73.00000000	0.47041096	4.16856591	1.581533
74	0.42946270	8.85678480	3.80365871		74.00000000	0.46405405	4.11002689	1.603021
75	0.43927205	8.85449310	3.88953134		75.00000000	0.45786667	4.05417724	1.624392
76	0.44941559	8.85992530	3.98178856		76.00000000	0.45184211	4.00328730	1.645744
77	0.45953980	8.85106850	4.06741825		77.00000000	0.44597403	3.94734665	1.667121
78	0.46941093	8.83523750	4.14735705		78.00000000	0.44025641	3.88976995	1.688590
79	0.47956416	8.83302500	4.23600221		79.00000000	0.43468354	3.83957061	1.709980
80	0.48936310	8.80481050	4.30874936		80.00000000	0.42925000	3.77946491	1.731339
81	0.49950889	8.80864430	4.39999614		81.00000000	0.42395062	3.73443019	1.752706
82	0.50930333	8.75240800	4.45763054		82.00000000	0.41878049	3.66533769	1.774196
83	0.51944023	8.71977810	4.52940354		83.00000000	0.41373494	3.60767687	1.795567
84	0.52923769	8.65195660	4.57894152		84.00000000	0.40880952	3.53700226	1.816921
85	0.53935295	8.57191750	4.62328899		85.00000000	0.40400000	3.46305467	1.838294
86	0.54950988	8.44329550	4.63967430		86.00000000	0.39930233	3.37142753	1.859777
87	0.55931032	8.27110770	4.62611589		87.00000000	0.39471264	3.26471079	1.881169
88	0.56944489	8.02169040	4.56791061		88.00000000	0.39022727	3.13028237	1.902528
89	0.57926989	7.70889710	4.46553198		89.00000000	0.38584270	2.97442165	1.923886
90	0.58939558	7.25449280	4.27576599		90.00000000	0.38155556	2.76799203	1.945368
91	0.59917969	6.67137480	3.99735228		91.00000000	0.37736264	2.51752759	1.966742
92	0.60928077	5.92560530	3.61035736		92.00000000	0.37326087	2.21179659	1.988226
93	0.61909240	4.98613120	3.08687593		93.00000000	0.36924731	1.84111554	2.009617
94	0.62921435	3.79794030	2.38971854		94.00000000	0.36531915	1.38746032	2.031113
95	0.63931918	2.37841490	1.52056626		95.00000000	0.36147368	0.85973440	2.052479
96	0.64908463	0.72162640	0.46839660		96.00000000	0.35770833	0.25813178	2.073870
97	0.65915298	-1.25420170	-0.82671079		97.00000000	0.35402062	-0.44401326	2.095359
98	0.66890877	-3.47878030	-2.32698665		98.00000000	0.35040816	-1.21899302	2.116737
99	0.67899352	-6.16225720	-4.18413271		99.00000000	0.34686869	-2.13749406	2.138096
100	0.68896514	-9.18126200	-6.32556946		100.00000000	0.34340000	-3.15284537	2.159515
101	0.69139147	-10.00002300	-6.91393060		101.00000000	0.34000000	-3.40000782	2.181014
14:14 02/04/2018
Test Lot:	JK-PERC
Recipe:	Recipe_YJX-LID
Cell Name:	1-5-60min
Test Order:	4
Test Condition:	Light
1	-0.29990962	8.87352750	-2.66125626		1.00000000	34.34000000	304.71693435	0.000000
2	-0.29015654	8.87186810	-2.57423055		2.00000000	17.17000000	152.32997528	0.061813
3	-0.27999112	8.87488080	-2.48488782		3.00000000	11.44666667	101.58780222	0.083228
4	-0.27014276	8.87772270	-2.39825251		4.00000000	8.58500000	76.21524938	0.104730
5	-0.26000416	8.88097190	-2.30908964		5.00000000	6.86800000	60.99451501	0.126125
6	-0.24986480	8.88426300	-2.21986460		6.00000000	5.72333333	50.84759857	0.147489
7	-0.24004473	8.87027260	-2.12926219		7.00000000	4.90571429	43.51502301	0.168865
8	-0.22992770	8.87441350	-2.04047348		8.00000000	4.29250000	38.09341995	0.190360
9	-0.22010539	8.87888430	-1.95429029		9.00000000	3.81555556	33.87787632	0.211742
10	-0.20992808	8.87442870	-1.86299178		10.00000000	3.43400000	30.47478816	0.233088
11	-0.20012067	8.87335400	-1.77574155		11.00000000	3.12181818	27.70099785	0.254477
12	-0.18997610	8.87815190	-1.68663667		12.00000000	2.86166667	25.40631135	0.275961
13	-0.18016720	8.86669830	-1.59748821		13.00000000	2.64153846	23.42172459	0.297358
14	-0.17002560	8.88136290	-1.51005906		14.00000000	2.45285714	21.78471443	0.318762
15	-0.16022861	8.85877130	-1.41942861		15.00000000	2.28933333	20.28068043	0.340118
16	-0.15005948	8.89178180	-1.33429615		16.00000000	2.14625000	19.08398669	0.361593
17	-0.13992755	8.85860440	-1.23956281		17.00000000	2.02000000	17.89438089	0.382960
18	-0.13009112	8.88215730	-1.15548979		18.00000000	1.90777778	16.94518232	0.404341
19	-0.11994729	8.87514970	-1.06455015		19.00000000	1.80736842	16.04066530	0.425701
20	-0.11010639	8.87275980	-0.97694755		20.00000000	1.71700000	15.23452858	0.447183
21	-0.09996033	8.86552810	-0.88620109		21.00000000	1.63523810	14.49724928	0.468566
22	-0.09012835	8.86775110	-0.79923575		22.00000000	1.56090909	13.84175331	0.489965
23	-0.07998973	8.87414840	-0.70984074		23.00000000	1.49304348	13.24948939	0.511456
24	-0.07013246	8.86278440	-0.62156885		24.00000000	1.43083333	12.68116735	0.532831
25	-0.05999012	8.88341900	-0.53291733		25.00000000	1.37360000	12.20226434	0.554193
26	-0.04983512	8.86108590	-0.44159331		26.00000000	1.32076923	11.70344961	0.575575
27	-0.04005972	8.88521960	-0.35593937		27.00000000	1.27185185	11.30068300	0.597046
28	-0.02991738	8.88218880	-0.26573178		28.00000000	1.22642857	10.89337012	0.618430
29	-0.02008391	8.87588690	-0.17826255		29.00000000	1.18413793	10.51027435	0.639771
30	-0.00996539	8.86847590	-0.08837785		30.00000000	1.14466667	10.15144875	0.661151
31	-0.00064549	8.86875250	-0.00572465		31.00000000	1.10774194	9.82428906	0.682754
32	0.00948920	8.86930370	0.08416262		32.00000000	1.07312500	9.51787153	0.704140
33	0.01931420	8.87777420	0.17146709		33.00000000	1.04060606	9.23826564	0.725501
34	0.02947113	8.86938000	0.26139068		34.00000000	1.01000000	8.95807380	0.746873
35	0.03927901	8.87761310	0.34870385		35.00000000	0.98114286	8.71020668	0.768352
36	0.04940618	8.88602540	0.43902453		36.00000000	0.95388889	8.47628090	0.789745
37	0.05926094	8.86915490	0.52559444		37.00000000	0.92810811	8.23153457	0.811092
38	0.06937917	8.87039470	0.61542065		38.00000000	0.90368421	8.01603563	0.832471
39	0.07951080	8.87185190	0.70540805		39.00000000	0.88051282	7.81177934	0.853958
40	0.08931645	8.86722370	0.79198894		40.00000000	0.85850000	7.61251155	0.875355
41	0.09949199	8.87202550	0.88269548		41.00000000	0.83756098	7.43086233	0.896721
42	0.10931252	8.86488440	0.96904285		42.00000000	0.81761905	7.24809834	0.918099
43	0.11945680	8.87537000	1.06022330		43.00000000	0.79860465	7.08791176	0.939593
44	0.12927659	8.86890130	1.14654132		44.00000000	0.78045455	6.92177433	0.960981
45	0.13942310	8.87239070	1.23701622		45.00000000	0.76311111	6.77061993	0.982375
46	0.14925182	8.86998940	1.32386206		46.00000000	0.74652174	6.62163991	1.003730
47	0.15939386	8.87018300	1.41385271		47.00000000	0.73063830	6.48089541	1.025209
48	0.16956495	8.87474920	1.50484640		48.00000000	0.71541667	6.34914349	1.046593
49	0.17935050	8.87428860	1.59160810		49.00000000	0.70081633	6.21924634	1.067978
50	0.18951488	8.86468700	1.67999009		50.00000000	0.68680000	6.08826703	1.089334
51	0.19928703	8.86876960	1.76743075		51.00000000	0.67333333	5.97163820	1.110810
52	0.20946777	8.86678980	1.85730669		52.00000000	0.66038462	5.85549157	1.132176
53	0.21926300	8.86971090	1.94479942		53.00000000	0.64792453	5.74690325	1.153563
54	0.22942811	8.88399980	2.03823928		54.00000000	0.63592593	5.64956580	1.175042
55	0.23927023	8.86405280	2.12090395		55.00000000	0.62436364	5.53439224	1.196434
56	0.24940410	8.86354920	2.21060551		56.00000000	0.61321429	5.43525499	1.217782
57	0.25953797	8.87131600	2.30244335		57.00000000	0.60245614	5.34457880	1.239148
58	0.26937932	8.86860750	2.38901946		58.00000000	0.59206897	5.25082727	1.260639
59	0.27950799	8.86691860	2.47837460		59.00000000	0.58203390	5.16084720	1.282019
60	0.28933817	8.86875630	2.56606972		60.00000000	0.57233333	5.07588486	1.303372
61	0.29948470	8.86571500	2.65514600		61.00000000	0.56295082	4.99096153	1.324749
62	0.30930820	8.86628630	2.74241506		62.00000000	0.55387097	4.91077857	1.346225
63	0.31943315	8.86348720	2.83129164		63.00000000	0.54507937	4.83130398	1.367602
64	0.32928047	8.86681840	2.91967013		64.00000000	0.53656250	4.75760225	1.388961
65	0.33943516	8.86753750	3.00995401		65.00000000	0.52830769	4.68478827	1.410339
66	0.34924081	8.85670190	3.09312175		66.00000000	0.52030303	4.60816884	1.431812
67	0.35939550	8.87130070	3.18830555		67.00000000	0.51253731	4.54687263	1.453201
68	0.36956286	8.86944390	3.27781705		68.00000000	0.50500000	4.47906917	1.474550
69	0.37935659	8.85646440	3.35975813		69.00000000	0.49768116	4.40769547	1.495930
70	0.38952172	8.85887150	3.45072286		70.00000000	0.49057143	4.34590925	1.517422
71	0.39932364	8.86236950	3.53895365		71.00000000	0.48366197	4.28639111	1.538799
72	0.40946496	8.85005470	3.62378729		72.00000000	0.47694444	4.22098442	1.560165
73	0.41928548	8.86278630	3.71603761		73.00000000	0.47041096	4.16915180	1.581545
74	0.42942977	8.86049370	3.80495977		74.00000000	0.46405405	4.11174802	1.603036
75	0.43924358	8.85305880	3.88864924		75.00000000	0.45786667	4.05352052	1.624429
76	0.44942063	8.84323410	3.97433184		76.00000000	0.45184211	3.99574551	1.645781
77	0.45956936	8.84588240	4.06529651		77.00000000	0.44597403	3.94503379	1.667142
78	0.46940106	8.84575370	4.15220616		78.00000000	0.44025641	3.89439977	1.688615
79	0.47954088	8.82665160	4.23274028		79.00000000	0.43468354	3.83680020	1.709979
80	0.48937631	8.80766680	4.31026348		80.00000000	0.42925000	3.78069097	1.731366
81	0.49948189	8.79177380	4.39133179		81.00000000	0.42395062	3.72727793	1.752732
82	0.50931656	8.75780580	4.46049552		82.00000000	0.41878049	3.66759819	1.774210
83	0.51947051	8.72028450	4.52993064		83.00000000	0.41373494	3.60788638	1.795621
84	0.52921140	8.65784360	4.58182953		84.00000000	0.40880952	3.53940892	1.817007
85	0.53935122	8.55505750	4.61418070		85.00000000	0.40400000	3.45624323	1.838503
86	0.54953200	8.45481110	4.64618925		86.00000000	0.39930233	3.37602573	1.859900
87	0.55935401	8.27813050	4.63040549		87.00000000	0.39471264	3.26748277	1.881248
88	0.56947070	8.02303790	4.56888501		88.00000000	0.39022727	3.13080820	1.902620
89	0.57928753	7.70676040	4.46443020		89.00000000	0.38584270	2.97359722	1.924099
90	0.58939832	7.25295690	4.27488061		90.00000000	0.38155556	2.76740600	1.945476
91	0.59918237	6.67716260	4.00083811		91.00000000	0.37736264	2.51971169	1.966820
92	0.60929763	5.91578870	3.60447603		92.00000000	0.37326087	2.20813243	1.988305
93	0.61912709	4.97476150	3.08000961		93.00000000	0.36924731	1.83691731	2.009825
94	0.62919992	3.79582830	2.38833486		94.00000000	0.36531915	1.38668876	2.031203
95	0.63935387	2.37169650	1.51635334		95.00000000	0.36147368	0.85730587	2.052619
96	0.64906132	0.72296822	0.46925071		96.00000000	0.35770833	0.25861176	2.074003
97	0.65918028	-1.26100870	-0.83123207		97.00000000	0.35402062	-0.44642308	2.095490
98	0.66889811	-3.48248720	-2.32942911		98.00000000	0.35040816	-1.22029194	2.116887
99	0.67901039	-6.16932630	-4.18903666		99.00000000	0.34686869	-2.13994611	2.138237
100	0.68896711	-9.18939880	-6.33119353		100.00000000	0.34340000	-3.15563955	2.159612
101	0.69135398	-10.00006200	-6.91358266		101.00000000	0.34000000	-3.40002108	2.181086
