# Supplementary material for: Study on the Electrical Injection Regeneration of Industrialized B-Doped Czochralski Silicon PERC Solar Cells
Source: Hindawi journal article supplement (doi:10.1155/2019/5357370), 2019-06-20
Supplement: f1 [file 5357370.f1.zip › section3.2/IVRawData_1-5-after.csv]

11:45 02/04/2018
Test Lot:	JK-PERC
Recipe:	Recipe_YJX-LID
Cell Name:	1-5-after
Test Order:	2
Test Condition:	Light
1	-0.29988703	8.91073130	-2.67221274		1.00000000	34.34000000	305.99451284	0.000000
2	-0.29013953	8.90470980	-2.58360832		2.00000000	17.17000000	152.89386727	0.061792
3	-0.27999902	8.90023420	-2.49205685		3.00000000	11.44666667	101.87801414	0.083226
4	-0.27021432	8.89269920	-2.40293467		4.00000000	8.58500000	76.34382263	0.104712
5	-0.26002172	8.90341000	-2.31507998		5.00000000	6.86800000	61.14861988	0.126099
6	-0.24988568	8.89192960	-2.22196587		6.00000000	5.72333333	50.89147708	0.147440
7	-0.24003473	8.90843770	-2.13833444		7.00000000	4.90571429	43.70225009	0.168815
8	-0.22990911	8.89929290	-2.04602851		8.00000000	4.29250000	38.20021477	0.190309
9	-0.22008197	8.90540410	-1.95991888		9.00000000	3.81555556	33.97906409	0.211679
10	-0.20991541	8.89691160	-1.86759885		10.00000000	3.43400000	30.55199443	0.233108
11	-0.20010912	8.90484140	-1.78193998		11.00000000	3.12181818	27.79929579	0.254503
12	-0.18994927	8.89074330	-1.68879020		12.00000000	2.86166667	25.44234374	0.275993
13	-0.18017349	8.90701960	-1.60480881		13.00000000	2.64153846	23.52823485	0.297379
14	-0.17003448	8.89699650	-1.51279617		14.00000000	2.45285714	21.82306142	0.318758
15	-0.16021180	8.88892750	-1.42411107		15.00000000	2.28933333	20.34971802	0.340104
16	-0.15006907	8.89275460	-1.33452741		16.00000000	2.14625000	19.08607456	0.361593
17	-0.13990103	8.89538570	-1.24447362		17.00000000	2.02000000	17.96867911	0.382979
18	-0.13009399	8.90021230	-1.15786413		18.00000000	1.90777778	16.97962724	0.404364
19	-0.11994158	8.89334300	-1.06668161		19.00000000	1.80736842	16.07354730	0.425775
20	-0.11013453	8.89602380	-0.97975940		20.00000000	1.71700000	15.27447286	0.447245
21	-0.09995385	8.90256880	-0.88984598		21.00000000	1.63523810	14.55781965	0.468629
22	-0.09013489	8.89635370	-0.80187185		22.00000000	1.56090909	13.88639937	0.490003
23	-0.07997802	8.90931220	-0.71254914		23.00000000	1.49304348	13.30199048	0.511366
24	-0.07017097	8.89194490	-0.62395639		24.00000000	1.43083333	12.72289116	0.532857
25	-0.06000219	8.90120890	-0.53409202		25.00000000	1.37360000	12.22670055	0.554229
26	-0.04986988	8.88742070	-0.44321460		26.00000000	1.32076923	11.73823180	0.575592
27	-0.04003827	8.90699480	-0.35662069		27.00000000	1.27185185	11.32837783	0.596976
28	-0.02992904	8.89737700	-0.26628992		28.00000000	1.22642857	10.91199736	0.618460
29	-0.02008701	8.89787580	-0.17873169		29.00000000	1.18413793	10.53631224	0.639819
30	-0.00995395	8.89431760	-0.08853361		30.00000000	1.14466667	10.18102888	0.661211
31	-0.00070142	8.89521880	-0.00623927		31.00000000	1.10774194	9.85360689	0.682671
32	0.00944706	8.88655760	0.08395184		32.00000000	1.07312500	9.53638712	0.704151
33	0.01926573	8.90099530	0.17148421		33.00000000	1.04060606	9.26242965	0.725537
34	0.02940818	8.89708330	0.26164698		34.00000000	1.01000000	8.98605413	0.746922
35	0.03924099	8.89857200	0.34918881		35.00000000	0.98114286	8.73077036	0.768399
36	0.04936259	8.90057470	0.43935544		36.00000000	0.95388889	8.49015931	0.789775
37	0.05918350	8.89161780	0.52623707		37.00000000	0.92810811	8.25238257	0.811126
38	0.06933785	8.90019230	0.61712022		38.00000000	0.90368421	8.04296325	0.832499
39	0.07948327	8.88433840	0.70615628		39.00000000	0.88051282	7.82277386	0.853980
40	0.08931609	8.89760590	0.79469932		40.00000000	0.85850000	7.63859467	0.875368
41	0.09944290	8.90111350	0.88515253		41.00000000	0.83756098	7.45522531	0.896732
42	0.10925711	8.89391420	0.97172336		42.00000000	0.81761905	7.27183366	0.918109
43	0.11942113	8.89445970	1.06218643		43.00000000	0.79860465	7.10315689	0.939593
44	0.12925246	8.88905910	1.14893276		44.00000000	0.78045455	6.93750658	0.960979
45	0.13939416	8.89381220	1.23974548		45.00000000	0.76311111	6.78696691	0.982348
46	0.14920688	8.90066430	1.32804035		46.00000000	0.74652174	6.64453939	1.003734
47	0.15934262	8.88985060	1.41653209		47.00000000	0.73063830	6.49526531	1.025221
48	0.16948134	8.89768220	1.50799110		48.00000000	0.71541667	6.36555014	1.046599
49	0.17932755	8.89887050	1.59581264		49.00000000	0.70081633	6.23647373	1.067960
50	0.18947372	8.90270710	1.68682903		50.00000000	0.68680000	6.11437924	1.089338
51	0.19924177	8.88643930	1.77054990		51.00000000	0.67333333	5.98353580	1.110827
52	0.20940134	8.90199660	1.86409002		52.00000000	0.66038462	5.87874160	1.132204
53	0.21924531	8.89215660	1.94956363		53.00000000	0.64792453	5.76144637	1.153546
54	0.22939967	8.89990520	2.04163532		54.00000000	0.63592593	5.65968045	1.174916
55	0.23921463	8.88755230	2.12603254		55.00000000	0.62436364	5.54906447	1.196392
56	0.24936675	8.90876480	2.22154972		56.00000000	0.61321429	5.46298184	1.217778
57	0.25948536	8.88838480	2.30640573		57.00000000	0.60245614	5.35486200	1.239147
58	0.26932263	8.89258770	2.39497511		58.00000000	0.59206897	5.26502520	1.260513
59	0.27948964	8.89947130	2.48731003		59.00000000	0.58203390	5.17979397	1.281992
60	0.28928152	8.88697340	2.57083717		60.00000000	0.57233333	5.08631111	1.303425
61	0.29943961	8.89736180	2.66422255		61.00000000	0.56295082	5.00877712	1.324802
62	0.30924562	8.88533310	2.74775034		62.00000000	0.55387097	4.92132804	1.346154
63	0.31938657	8.89496900	2.84093364		63.00000000	0.54507937	4.84846405	1.367635
64	0.32923278	8.88115220	2.92396643		64.00000000	0.53656250	4.76529323	1.389019
65	0.33935812	8.88629910	3.01563776		65.00000000	0.52830769	4.69470017	1.410400
66	0.34918350	8.89406780	3.10566172		66.00000000	0.52030303	4.62761043	1.431885
67	0.35934454	8.88691810	3.19346550		67.00000000	0.51253731	4.55487713	1.453258
68	0.36948848	8.88985350	3.28469846		68.00000000	0.50500000	4.48937602	1.474623
69	0.37931904	8.88705830	3.37103042		69.00000000	0.49768116	4.42292148	1.496002
70	0.38942724	8.88903430	3.46163209		70.00000000	0.49057143	4.36070626	1.517483
71	0.39926973	8.89932630	3.55323161		71.00000000	0.48366197	4.30426571	1.538861
72	0.40943304	8.88957980	3.63968768		72.00000000	0.47694444	4.23983570	1.560220
73	0.41923457	8.88609030	3.72535625		73.00000000	0.47041096	4.18011426	1.581601
74	0.42938372	8.88155940	3.81359701		74.00000000	0.46405405	4.12152365	1.603092
75	0.43922323	8.88663290	3.90321561		75.00000000	0.45786667	4.06889298	1.624474
76	0.44937685	8.87378120	3.98767184		76.00000000	0.45184211	4.00954798	1.645827
77	0.45952672	8.88232040	4.08166356		77.00000000	0.44597403	3.96128419	1.667212
78	0.46934912	8.86891170	4.16261590		78.00000000	0.44025641	3.90459523	1.688690
79	0.47949901	8.86233620	4.24948143		79.00000000	0.43468354	3.85231171	1.710068
80	0.48933032	8.83124260	4.32139477		80.00000000	0.42925000	3.79081089	1.731443
81	0.49944448	8.82724380	4.40871819		81.00000000	0.42395062	3.74231546	1.752825
82	0.50927877	8.79002190	4.47657154		82.00000000	0.41878049	3.68108966	1.774312
83	0.51941454	8.75196840	4.54589964		83.00000000	0.41373494	3.62099512	1.795698
84	0.52919304	8.69920830	4.60356049		84.00000000	0.40880952	3.55631920	1.817051
85	0.53934216	8.61051080	4.64401149		85.00000000	0.40400000	3.47864636	1.838420
86	0.54947865	8.48549750	4.66259971		86.00000000	0.39930233	3.38827889	1.859909
87	0.55927497	8.32099910	4.65372652		87.00000000	0.39471264	3.28440355	1.881301
88	0.56940997	8.07507130	4.59802611		88.00000000	0.39022727	3.15111305	1.902705
89	0.57921898	7.76827240	4.49953082		89.00000000	0.38584270	2.99733117	1.924127
90	0.58937109	7.31976030	4.31405511		90.00000000	0.38155556	2.79289521	1.945610
91	0.59912205	6.75603340	4.04768858		91.00000000	0.37736264	2.54947458	1.967016
92	0.60928011	6.01393080	3.66416842		92.00000000	0.37326087	2.24476504	1.988497
93	0.61904150	5.11515140	3.16649100		93.00000000	0.36924731	1.88875590	2.009876
94	0.62918246	3.97126530	2.49865047		94.00000000	0.36531915	1.45077926	2.031361
95	0.63929510	2.62295510	1.67684234		95.00000000	0.36147368	0.94812924	2.052736
96	0.64901036	1.05244170	0.68304557		96.00000000	0.35770833	0.37646717	2.074124
97	0.65914011	-0.81926972	-0.54001353		97.00000000	0.35402062	-0.29003837	2.095630
98	0.66889477	-2.90003200	-1.93981624		98.00000000	0.35040816	-1.01619489	2.117003
99	0.67893821	-5.40878300	-3.67222945		99.00000000	0.34686869	-1.87613746	2.138352
100	0.68887746	-8.19278140	-5.64382244		100.00000000	0.34340000	-2.81340113	2.159725
101	0.69458920	-9.99843880	-6.94480761		101.00000000	0.34000000	-3.39946919	2.181204
11:45 02/04/2018
Test Lot:	JK-PERC
Recipe:	Recipe_YJX-LID
Cell Name:	1-5-after
Test Order:	3
Test Condition:	Light
1	-0.29990676	8.88909530	-2.66589977		1.00000000	34.34000000	305.25153260	0.000000
2	-0.29009172	8.89414980	-2.58011921		2.00000000	17.17000000	152.71255207	0.061741
3	-0.27995363	8.88374140	-2.48703565		3.00000000	11.44666667	101.68922656	0.083266
4	-0.27015719	8.88565730	-2.40052421		4.00000000	8.58500000	76.28336792	0.104664
5	-0.25996479	8.88586040	-2.31001083		5.00000000	6.86800000	61.02808923	0.126019
6	-0.24980512	8.88575080	-2.21970604		6.00000000	5.72333333	50.85611375	0.147404
7	-0.24000645	8.88001160	-2.13126006		7.00000000	4.90571429	43.56279976	0.168906
8	-0.22983859	8.88059900	-2.04110435		8.00000000	4.29250000	38.11997121	0.190279
9	-0.21999377	8.88594060	-1.95485157		9.00000000	3.81555556	33.90480002	0.211635
10	-0.20986389	8.88450050	-1.86453584		10.00000000	3.43400000	30.50937472	0.233013
11	-0.20002203	8.88502980	-1.77720170		11.00000000	3.12181818	27.73744758	0.254510
12	-0.18989140	8.89120580	-1.68836352		12.00000000	2.86166667	25.44366726	0.275903
13	-0.18010835	8.89621070	-1.60228183		13.00000000	2.64153846	23.49968273	0.297248
14	-0.16995241	8.88442900	-1.50993012		14.00000000	2.45285714	21.79223513	0.318627
15	-0.16012023	8.89871120	-1.42486368		15.00000000	2.28933333	20.37211617	0.340115
16	-0.14996950	8.87434860	-1.33088162		16.00000000	2.14625000	19.04657068	0.361487
17	-0.13986716	8.89204220	-1.24370469		17.00000000	2.02000000	17.96192524	0.382856
18	-0.13002755	8.88763140	-1.15563694		18.00000000	1.90777778	16.95562568	0.404232
19	-0.11986937	8.87856770	-1.06426832		19.00000000	1.80736842	16.04684289	0.425721
20	-0.11004613	8.88627620	-0.97790031		20.00000000	1.71700000	15.25773624	0.447104
21	-0.09987828	8.89026640	-0.88794453		21.00000000	1.63523810	14.53770229	0.468451
22	-0.09007885	8.88128660	-0.80001611		22.00000000	1.56090909	13.86288099	0.489831
23	-0.07992961	8.89318370	-0.71082873		23.00000000	1.49304348	13.27790992	0.511317
24	-0.07012573	8.86695580	-0.62180174		24.00000000	1.43083333	12.68713592	0.532692
25	-0.05995267	8.89894100	-0.53351523		25.00000000	1.37360000	12.22358536	0.554038
26	-0.04983394	8.88059230	-0.44255489		26.00000000	1.32076923	11.72921306	0.575416
27	-0.04004196	8.88017850	-0.35557976		27.00000000	1.27185185	11.29427147	0.596908
28	-0.02987560	8.88517950	-0.26545006		28.00000000	1.22642857	10.89703800	0.618305
29	-0.02006204	8.88665870	-0.17828446		29.00000000	1.18413793	10.52302965	0.639684
30	-0.00989865	8.88672160	-0.08796656		30.00000000	1.14466667	10.17233399	0.661022
31	-0.00067159	8.89434050	-0.00597338		31.00000000	1.10774194	9.85263396	0.682618
32	0.00947446	8.88536360	0.08418406		32.00000000	1.07312500	9.53510581	0.704003
33	0.01930264	8.88599400	0.17152310		33.00000000	1.04060606	9.24681921	0.725390
34	0.02947764	8.89070890	0.26207709		34.00000000	1.01000000	8.97961599	0.746837
35	0.03926934	8.87924000	0.34868186		35.00000000	0.98114286	8.71180290	0.768299
36	0.04941383	8.88786700	0.43918351		36.00000000	0.95388889	8.47803758	0.789674
37	0.05923306	8.88559720	0.52632113		37.00000000	0.92810811	8.24679481	0.811086
38	0.06936490	8.87739940	0.61577990		38.00000000	0.90368421	8.02236567	0.832451
39	0.07952129	8.88719750	0.70672142		39.00000000	0.88051282	7.82529134	0.853945
40	0.08935318	8.87854960	0.79332665		40.00000000	0.85850000	7.62223483	0.875337
41	0.09949841	8.89098070	0.88463848		41.00000000	0.83756098	7.44673847	0.896718
42	0.10933849	8.87429050	0.97030152		42.00000000	0.81761905	7.25578895	0.918092
43	0.11948596	8.88341900	1.06144385		43.00000000	0.79860465	7.09433973	0.939585
44	0.12931338	8.88095280	1.14842602		44.00000000	0.78045455	6.93117998	0.960960
45	0.13947275	8.87449740	1.23775056		45.00000000	0.76311111	6.77222757	0.982352
46	0.14928381	8.89345740	1.32764920		46.00000000	0.74652174	6.63915929	1.003717
47	0.15944169	8.90320010	1.41954127		47.00000000	0.73063830	6.50501897	1.025188
48	0.16956608	8.87457940	1.50482764		48.00000000	0.71541667	6.34902201	1.046568
49	0.17938383	8.89084910	1.59487456		49.00000000	0.70081633	6.23085221	1.067956
50	0.18955660	8.86428360	1.68028346		50.00000000	0.68680000	6.08798998	1.089443
51	0.19930960	8.89433190	1.77272573		51.00000000	0.67333333	5.98885015	1.110839
52	0.20947568	8.88410850	1.86100467		52.00000000	0.66038462	5.86692857	1.132201
53	0.21931277	8.87978940	1.94745121		53.00000000	0.64792453	5.75343336	1.153583
54	0.22943866	8.88349720	2.03821769		54.00000000	0.63592593	5.64924618	1.175069
55	0.23928171	8.88769150	2.12666202		55.00000000	0.62436364	5.54915138	1.196473
56	0.24940164	8.88332750	2.21551645		56.00000000	0.61321429	5.44738333	1.217837
57	0.25954390	8.88207440	2.30528823		57.00000000	0.60245614	5.35106026	1.239212
58	0.26936835	8.87933350	2.39181141		58.00000000	0.59206897	5.25717780	1.260710
59	0.27949497	8.87649150	2.48093473		59.00000000	0.58203390	5.16641895	1.282098
60	0.28929782	8.88604930	2.57071469		60.00000000	0.57233333	5.08578222	1.303457
61	0.29946911	8.87214090	2.65693214		61.00000000	0.56295082	4.99457899	1.324837
62	0.30927569	8.89099600	2.74976892		62.00000000	0.55387097	4.92446456	1.346324
63	0.31945071	8.87242130	2.83430128		63.00000000	0.54507937	4.83617377	1.367715
64	0.32925802	8.88686180	2.92607052		64.00000000	0.53656250	4.76835678	1.389063
65	0.33941442	8.87614150	3.01269042		65.00000000	0.52830769	4.68933383	1.410445
66	0.34921581	8.87948890	3.10085791		66.00000000	0.52030303	4.62002498	1.431933
67	0.35937518	8.87733940	3.19029544		67.00000000	0.51253731	4.54996769	1.453303
68	0.36952487	8.87192920	3.27839848		68.00000000	0.50500000	4.48032425	1.474663
69	0.37936494	8.87946030	3.36855592		69.00000000	0.49768116	4.41914010	1.496054
70	0.38947743	8.87518020	3.45668238		70.00000000	0.49057143	4.35390983	1.517533
71	0.39931825	8.88586900	3.54828966		71.00000000	0.48366197	4.29775692	1.538913
72	0.40948433	8.86687760	3.63084743		72.00000000	0.47694444	4.22900801	1.560266
73	0.41931176	8.88326070	3.72485568		73.00000000	0.47041096	4.17878318	1.581639
74	0.42942572	8.87974450	3.81319068		74.00000000	0.46405405	4.12068143	1.603130
75	0.43926284	8.87493130	3.89842753		75.00000000	0.45786667	4.06353521	1.624519
76	0.44942519	8.86951730	3.98618450		76.00000000	0.45184211	4.00762137	1.645918
77	0.45957115	8.86476610	4.07399075		77.00000000	0.44597403	3.95345543	1.667264
78	0.46942985	8.85148050	4.15514916		78.00000000	0.44025641	3.89692103	1.688748
79	0.47958997	8.84783550	4.24333316		79.00000000	0.43468354	3.84600849	1.710134
80	0.48940623	8.82788940	4.32042407		80.00000000	0.42925000	3.78937152	1.731519
81	0.49950457	8.81207180	4.40167014		81.00000000	0.42395062	3.73588328	1.753027
82	0.50932753	8.78281310	4.47332850		82.00000000	0.41878049	3.67807075	1.774413
83	0.51947200	8.75198750	4.54641245		83.00000000	0.41373494	3.62100302	1.795772
84	0.52924955	8.68426130	4.59614139		84.00000000	0.40880952	3.55020873	1.817149
85	0.53941637	8.59279730	4.63509553		85.00000000	0.40400000	3.47149011	1.838629
86	0.54953778	8.48234650	4.66136986		86.00000000	0.39930233	3.38702068	1.860014
87	0.55931830	8.30036160	4.64254414		87.00000000	0.39471264	3.27625767	1.881384
88	0.56947029	8.05876730	4.58922855		88.00000000	0.39022727	3.14475079	1.902771
89	0.57926422	7.73467400	4.48041990		89.00000000	0.38584270	2.98436747	1.924259
90	0.58939898	7.28708510	4.29500053		90.00000000	0.38155556	2.78042780	1.945642
91	0.59919071	6.72103880	4.02718401		91.00000000	0.37736264	2.53626893	1.966994
92	0.60929948	5.97702500	3.64179822		92.00000000	0.37326087	2.23098955	1.988495
93	0.61910534	5.06508590	3.13582173		93.00000000	0.36924731	1.87026935	2.010056
94	0.62921929	3.91853740	2.46561932		94.00000000	0.36531915	1.43151675	2.031438
95	0.63934141	2.53437070	1.62032814		95.00000000	0.36147368	0.91610831	2.052791
96	0.64910042	0.97207153	0.63097204		96.00000000	0.35770833	0.34771809	2.074181
97	0.65916151	-0.90943605	-0.59946524		97.00000000	0.35402062	-0.32195911	2.095674
98	0.66889518	-3.00489760	-2.00996152		98.00000000	0.35040816	-1.05294065	2.117110
99	0.67901510	-5.51057100	-3.74176092		99.00000000	0.34686869	-1.91144453	2.138470
100	0.68895489	-8.31620600	-5.72949079		100.00000000	0.34340000	-2.85578514	2.159848
101	0.69422883	-9.99887180	-6.94150507		101.00000000	0.34000000	-3.39961641	2.181330
11:46 02/04/2018
Test Lot:	JK-PERC
Recipe:	Recipe_YJX-LID
Cell Name:	1-5-after
Test Order:	4
Test Condition:	Light
1	-0.29986748	8.88515470	-2.66436895		1.00000000	34.34000000	305.11621240	0.000000
2	-0.29006952	8.89223290	-2.57936573		2.00000000	17.17000000	152.67963889	0.061789
3	-0.27990389	8.87099930	-2.48302721		3.00000000	11.44666667	101.54337199	0.083217
4	-0.27007911	8.88089750	-2.39854489		4.00000000	8.58500000	76.24250504	0.104730
5	-0.25994325	8.87780000	-2.30772418		5.00000000	6.86800000	60.97273040	0.126168
6	-0.24977984	8.88085270	-2.21825797		6.00000000	5.72333333	50.82808029	0.147534
7	-0.23995954	8.88781360	-2.13271566		7.00000000	4.90571429	43.60107415	0.168922
8	-0.22982888	8.87587260	-2.03993186		8.00000000	4.29250000	38.09968314	0.190414
9	-0.21999742	8.88601590	-1.95490057		9.00000000	3.81555556	33.90508733	0.211792
10	-0.20982060	8.89056680	-1.86542406		10.00000000	3.43400000	30.53020639	0.233150
11	-0.20001817	8.88528160	-1.77721777		11.00000000	3.12181818	27.73823365	0.254526
12	-0.18985997	8.88221930	-1.68637789		12.00000000	2.86166667	25.41795090	0.276011
13	-0.18007466	8.88505840	-1.59997387		13.00000000	2.64153846	23.47022350	0.297401
14	-0.16990231	8.89301680	-1.51094410		14.00000000	2.45285714	21.81329978	0.318745
15	-0.16009468	8.88356300	-1.42221118		15.00000000	2.28933333	20.33743689	0.340126
16	-0.14995135	8.87677860	-1.33108493		16.00000000	2.14625000	19.05178607	0.361617
17	-0.13979018	8.89658160	-1.24365474		17.00000000	2.02000000	17.97109483	0.383005
18	-0.12998104	8.87470630	-1.15354355		18.00000000	1.90777778	16.93096746	0.404384
19	-0.11984815	8.88749980	-1.06515041		19.00000000	1.80736842	16.06298648	0.425766
20	-0.11001595	8.87507820	-0.97640016		20.00000000	1.71700000	15.23850927	0.447246
21	-0.09984881	8.89420510	-0.88807583		21.00000000	1.63523810	14.54414301	0.468633
22	-0.09005681	8.87461760	-0.79921972		22.00000000	1.56090909	13.85247129	0.490019
23	-0.07989413	8.88162710	-0.70958990		23.00000000	1.49304348	13.26065542	0.511363
24	-0.07007086	8.88806340	-0.62279427		24.00000000	1.43083333	12.71733738	0.532837
25	-0.05991340	8.87510680	-0.53173786		25.00000000	1.37360000	12.19084670	0.554207
26	-0.04978944	8.89049050	-0.44265251		26.00000000	1.32076923	11.74228630	0.575584
27	-0.03995203	8.88645170	-0.35503174		27.00000000	1.27185185	11.30225005	0.597013
28	-0.02980722	8.87866780	-0.26464840		28.00000000	1.22642857	10.88905187	0.618495
29	-0.02000851	8.88549710	-0.17778558		29.00000000	1.18413793	10.52165415	0.639877
30	-0.00985701	8.88559060	-0.08758532		30.00000000	1.14466667	10.17103937	0.661241
31	-0.00063960	8.87833600	-0.00567856		31.00000000	1.10774194	9.83490510	0.682709
32	0.00953105	8.87954430	0.08463140		32.00000000	1.07312500	9.52886098	0.704192
33	0.01934660	8.89835260	0.17215286		33.00000000	1.04060606	9.25967964	0.725582
34	0.02949633	8.88264180	0.26200529		34.00000000	1.01000000	8.97146822	0.746959
35	0.03931262	8.89474390	0.34967565		35.00000000	0.98114286	8.72701444	0.768344
36	0.04943257	8.87186430	0.43855907		36.00000000	0.95388889	8.46277278	0.789826
37	0.05926598	8.88516330	0.52658793		37.00000000	0.92810811	8.24639210	0.811209
38	0.06940752	8.88599970	0.61675523		38.00000000	0.90368421	8.03013762	0.832615
39	0.07955651	8.88011170	0.70647070		39.00000000	0.88051282	7.81905220	0.853960
40	0.08940108	8.88460450	0.79429325		40.00000000	0.85850000	7.62743296	0.875441
41	0.09953071	8.87856960	0.88369035		41.00000000	0.83756098	7.43634342	0.896832
42	0.10936709	8.88805390	0.97206059		42.00000000	0.81761905	7.26704216	0.918224
43	0.11950045	8.87990670	1.06115285		43.00000000	0.79860465	7.09153479	0.939717
44	0.12933907	8.86627860	1.14675623		44.00000000	0.78045455	6.91972743	0.961093
45	0.13947764	8.89172360	1.24019662		45.00000000	0.76311111	6.78537308	0.982440
46	0.14929095	8.87832450	1.32545350		46.00000000	0.74652174	6.62786225	1.003822
47	0.15944365	8.88628960	1.41686245		47.00000000	0.73063830	6.49266351	1.025307
48	0.16958743	8.87000470	1.50424130		48.00000000	0.71541667	6.34574920	1.046702
49	0.17942530	8.88222120	1.59369520		49.00000000	0.70081633	6.22480563	1.068101
50	0.18957280	8.87008480	1.68152681		50.00000000	0.68680000	6.09197424	1.089488
51	0.19932805	8.89140130	1.77230568		51.00000000	0.67333333	5.98687688	1.110979
52	0.20949490	8.88809010	1.86200955		52.00000000	0.66038462	5.86955796	1.132381
53	0.21930227	8.87696930	1.94673952		53.00000000	0.64792453	5.75160615	1.153731
54	0.22946836	8.88456250	2.03872599		54.00000000	0.63592593	5.64992363	1.175103
55	0.23928688	8.87603760	2.12391934		55.00000000	0.62436364	5.54187511	1.196593
56	0.24943587	8.88548850	2.21635955		56.00000000	0.61321429	5.44870848	1.217984
57	0.25956699	8.88030340	2.30503362		57.00000000	0.60245614	5.34999331	1.239362
58	0.26940784	8.88150980	2.39274837		58.00000000	0.59206897	5.25846632	1.260737
59	0.27956277	8.88504120	2.48392673		59.00000000	0.58203390	5.17139517	1.282227
60	0.28937164	8.87894150	2.56931386		60.00000000	0.57233333	5.08171419	1.303613
61	0.29950351	8.88261320	2.66037383		61.00000000	0.56295082	5.00047438	1.324971
62	0.30933616	8.89087390	2.75026879		62.00000000	0.55387097	4.92439693	1.346347
63	0.31948811	8.88912200	2.83996879		63.00000000	0.54507937	4.84527698	1.367832
64	0.32930145	8.88819690	2.92689613		64.00000000	0.53656250	4.76907315	1.389215
65	0.33942661	8.85736660	3.00642592		65.00000000	0.52830769	4.67941491	1.410582
66	0.34924886	8.89681340	3.10720194		66.00000000	0.52030303	4.62903897	1.431962
67	0.35940006	8.86798100	3.18715290		67.00000000	0.51253731	4.54517116	1.453447
68	0.36956617	8.88174720	3.28239330		68.00000000	0.50500000	4.48528234	1.474819
69	0.37940106	8.87614440	3.36761859		69.00000000	0.49768116	4.41748984	1.496221
70	0.38950986	8.87389370	3.45646909		70.00000000	0.49057143	4.35327871	1.517563
71	0.39933434	8.87246510	3.54307999		71.00000000	0.48366197	4.29127397	1.539035
72	0.40950266	8.88499160	3.63842769		72.00000000	0.47694444	4.23764738	1.560424
73	0.41932416	8.87522030	3.72159430		73.00000000	0.47041096	4.17500089	1.581811
74	0.42945826	8.85900210	3.80457163		74.00000000	0.46405405	4.11105584	1.603294
75	0.43929762	8.87319760	3.89797459		75.00000000	0.45786667	4.06274141	1.624684
76	0.44943991	8.85521890	3.97988879		76.00000000	0.45184211	4.00116075	1.646033
77	0.45959485	8.87027840	4.07673427		77.00000000	0.44597403	3.95591377	1.667426
78	0.46943942	8.86965750	4.16376687		78.00000000	0.44025641	3.90492357	1.688905
79	0.47959808	8.85478310	4.24673697		79.00000000	0.43468354	3.84902850	1.710291
80	0.48941362	8.82461360	4.31888609		80.00000000	0.42925000	3.78796539	1.731651
81	0.49955666	8.80831910	4.40025447		81.00000000	0.42395062	3.73429232	1.753024
82	0.50938559	8.79761310	4.48137734		82.00000000	0.41878049	3.68426871	1.774513
83	0.51951748	8.73302940	4.53696143		83.00000000	0.41373494	3.61315939	1.795895
84	0.52929580	8.68810560	4.59857780		84.00000000	0.40880952	3.55178031	1.817255
85	0.53939342	8.59703730	4.63718535		85.00000000	0.40400000	3.47320307	1.838681
86	0.54956102	8.46915250	4.65431609		86.00000000	0.39930233	3.38175229	1.860168
87	0.55938101	8.30795860	4.64731427		87.00000000	0.39471264	3.27925630	1.881559
88	0.56952035	8.04934120	4.58426362		88.00000000	0.39022727	3.14107246	1.902922
89	0.57929420	7.74999710	4.48952837		89.00000000	0.38584270	2.99027978	1.924307
90	0.58941567	7.29733940	4.30116619		90.00000000	0.38155556	2.78434039	1.945785
91	0.59918356	6.72720050	4.03082794		91.00000000	0.37736264	2.53859412	1.967170
92	0.60929906	5.97472480	3.64039420		92.00000000	0.37326087	2.23013097	1.988622
93	0.61914736	5.06256390	3.13447307		93.00000000	0.36924731	1.86933811	2.010019
94	0.62925988	3.92070820	2.46714437		94.00000000	0.36531915	1.43230978	2.031519
95	0.63935971	2.52187280	1.61238386		95.00000000	0.36147368	0.91159065	2.052895
96	0.64904356	0.94868493	0.61573784		96.00000000	0.35770833	0.33935251	2.074271
97	0.65920591	-0.96252853	-0.63450450		97.00000000	0.35402062	-0.34075495	2.095638
98	0.66898203	-3.07778170	-2.05898065		98.00000000	0.35040816	-1.07847983	2.117148
99	0.67898440	-5.62886430	-3.82191105		99.00000000	0.34686869	-1.95247677	2.138533
100	0.68893093	-8.48366740	-5.84466087		100.00000000	0.34340000	-2.91329139	2.159929
101	0.69368911	-9.99984840	-6.93678594		101.00000000	0.34000000	-3.39994846	2.181283
