# Supplementary material for: Study on the Electrical Injection Regeneration of Industrialized B-Doped Czochralski Silicon PERC Solar Cells
Source: Hindawi journal article supplement (doi:10.1155/2019/5357370), 2019-06-20
Supplement: f1 [file 5357370.f1.zip › section3.2/IVRawData_1-5.csv]

11:23 02/04/2018
Test Lot:	JK-PERC
Recipe:	Recipe_YJX-LID
Cell Name:	1-5
Test Order:	2
Test Condition:	Light
1	-0.29981363	9.03590200	-2.70908658		1.00000000	34.34000000	310.29287468	0.000000
2	-0.29005951	9.02996730	-2.61922789		2.00000000	17.17000000	155.04453854	0.061751
3	-0.27988786	9.03434850	-2.52860447		3.00000000	11.44666667	103.41317583	0.083234
4	-0.27006674	9.02759740	-2.43805380		4.00000000	8.58500000	77.50192368	0.104667
5	-0.25991666	9.02068230	-2.34462561		5.00000000	6.86800000	61.95404604	0.126040
6	-0.24977924	9.03310490	-2.25628208		6.00000000	5.72333333	51.69947038	0.147413
7	-0.23994921	9.02118590	-2.16462643		7.00000000	4.90571429	44.25536054	0.168945
8	-0.22979169	9.02941990	-2.07488566		8.00000000	4.29250000	38.75878492	0.190348
9	-0.21997133	9.05031390	-1.99080959		9.00000000	3.81555556	34.53197548	0.211701
10	-0.20984209	9.03135590	-1.89515860		10.00000000	3.43400000	31.01367616	0.233116
11	-0.20001651	9.04824450	-1.80979829		11.00000000	3.12181818	28.24697419	0.254617
12	-0.18987685	9.03903290	-1.71630309		12.00000000	2.86166667	25.86669915	0.276027
13	-0.18007660	9.03278640	-1.62659346		13.00000000	2.64153846	23.86045269	0.297396
14	-0.16993767	9.04115870	-1.53643344		14.00000000	2.45285714	22.17667070	0.318771
15	-0.16012029	9.02734380	-1.44546091		15.00000000	2.28933333	20.66659907	0.340265
16	-0.14991289	9.03469370	-1.35441704		16.00000000	2.14625000	19.39071135	0.361641
17	-0.13979706	9.03391740	-1.26291509		17.00000000	2.02000000	18.24851315	0.382982
18	-0.12999456	9.03556630	-1.17457447		18.00000000	1.90777778	17.23785260	0.404371
19	-0.11984374	9.04182340	-1.08360593		19.00000000	1.80736842	16.34190608	0.425858
20	-0.11003306	9.02583220	-0.99313994		20.00000000	1.71700000	15.49735389	0.447236
21	-0.09984054	9.04039100	-0.90259756		21.00000000	1.63523810	14.78319176	0.468597
22	-0.09005889	9.02303310	-0.81260437		22.00000000	1.56090909	14.08413439	0.489977
23	-0.07988202	9.03199200	-0.72149375		23.00000000	1.49304348	13.48515675	0.511458
24	-0.07008547	9.03166290	-0.63298837		24.00000000	1.43083333	12.92280433	0.532848
25	-0.05991232	9.02562710	-0.54074626		25.00000000	1.37360000	12.39760138	0.554197
26	-0.04976596	9.03520770	-0.44964578		26.00000000	1.32076923	11.93342432	0.575569
27	-0.03994858	9.04098700	-0.36117458		27.00000000	1.27185185	11.49879606	0.597064
28	-0.02980892	9.02816870	-0.26911992		28.00000000	1.22642857	11.07240404	0.618453
29	-0.01998558	9.03348540	-0.18053947		29.00000000	1.18413793	10.69689271	0.639798
30	-0.00984369	9.03595350	-0.08894710		30.00000000	1.14466667	10.34315477	0.661179
31	-0.00061803	9.03474710	-0.00558375		31.00000000	1.10774194	10.00816824	0.682775
32	0.00953705	9.03912930	0.08620666		32.00000000	1.07312500	9.70011563	0.704161
33	0.01931768	9.02230930	0.17429011		33.00000000	1.04060606	9.38866974	0.725584
34	0.02944813	9.03174500	0.26596796		34.00000000	1.01000000	9.12206245	0.746938
35	0.03929946	9.04499720	0.35546352		35.00000000	0.98114286	8.87443440	0.768413
36	0.04943809	9.03425790	0.44663645		36.00000000	0.95388889	8.61767823	0.789779
37	0.05926933	9.04056840	0.53582844		37.00000000	0.92810811	8.39062483	0.811160
38	0.06941392	9.03587720	0.62721561		38.00000000	0.90368421	8.16557955	0.832585
39	0.07954212	9.03171630	0.71840189		39.00000000	0.88051282	7.95254199	0.854050
40	0.08939271	9.03821180	0.80795028		40.00000000	0.85850000	7.75930483	0.875430
41	0.09953135	9.02576350	0.89834638		41.00000000	0.83756098	7.55962728	0.896830
42	0.10935142	9.04540250	0.98912761		42.00000000	0.81761905	7.39569338	0.918189
43	0.11949898	9.02338410	1.07828520		43.00000000	0.79860465	7.20611651	0.939675
44	0.12931608	9.02912330	1.16761083		44.00000000	0.78045455	7.04682032	0.961055
45	0.13944429	9.03016950	1.25920557		45.00000000	0.76311111	6.89102268	0.982454
46	0.14928149	9.02814480	1.34773491		46.00000000	0.74652174	6.73970636	1.003833
47	0.15943873	9.04427620	1.44200791		47.00000000	0.73063830	6.60809457	1.025347
48	0.16957512	9.01719950	1.52909269		48.00000000	0.71541667	6.45105481	1.046723
49	0.17942125	9.04649450	1.62313335		49.00000000	0.70081633	6.33993104	1.068109
50	0.18954425	9.02235410	1.71013534		50.00000000	0.68680000	6.19655280	1.089455
51	0.19933529	9.03003410	1.80000447		51.00000000	0.67333333	6.08022296	1.110921
52	0.20948286	9.03049470	1.89173386		52.00000000	0.66038462	5.96359977	1.132318
53	0.21928731	9.02685550	1.97947486		53.00000000	0.64792453	5.84872109	1.153707
54	0.22945867	9.03796770	2.07384005		54.00000000	0.63592593	5.74747798	1.175185
55	0.23928173	9.02204700	2.15881101		55.00000000	0.62436364	5.63303807	1.196579
56	0.24944864	9.03570650	2.25394470		56.00000000	0.61321429	5.54082431	1.217927
57	0.25956050	9.02585700	2.34275596		57.00000000	0.60245614	5.43768297	1.239357
58	0.26939246	9.03082560	2.43283632		58.00000000	0.59206897	5.34687157	1.260837
59	0.27954227	9.02452180	2.52273531		59.00000000	0.58203390	5.25257760	1.282218
60	0.28936011	9.02652840	2.61191725		60.00000000	0.57233333	5.16618309	1.303571
61	0.29952925	9.03310970	2.70568057		61.00000000	0.56295082	5.08519651	1.324949
62	0.30933890	9.01448250	2.78853010		62.00000000	0.55387097	4.99286015	1.346443
63	0.31947678	9.05194950	2.89188768		63.00000000	0.54507937	4.93403089	1.367831
64	0.32929909	9.01896000	2.96993532		64.00000000	0.53656250	4.83923573	1.389183
65	0.33944070	9.02579690	3.06372282		65.00000000	0.52830769	4.76839793	1.410560
66	0.34923995	9.01835920	3.14957132		66.00000000	0.52030303	4.69227962	1.432047
67	0.35939419	9.02442550	3.24332609		67.00000000	0.51253731	4.62535480	1.453429
68	0.36957377	9.01914690	3.33324012		68.00000000	0.50500000	4.55466918	1.474775
69	0.37936780	9.03264620	3.42669512		69.00000000	0.49768116	4.49537783	1.496157
70	0.38953546	9.02149010	3.51419030		70.00000000	0.49057143	4.42568529	1.517645
71	0.39934510	9.02959060	3.60592276		71.00000000	0.48366197	4.36726959	1.539027
72	0.40946960	9.01888470	3.69295911		72.00000000	0.47694444	4.30150695	1.560390
73	0.41931498	9.00911330	3.77765616		73.00000000	0.47041096	4.23798563	1.581762
74	0.42947370	9.03720380	3.88124135		74.00000000	0.46405405	4.19375106	1.603243
75	0.43926325	9.01485250	3.95989341		75.00000000	0.45786667	4.12760046	1.624625
76	0.44943538	9.01375290	4.05109946		76.00000000	0.45184211	4.07279309	1.645987
77	0.45958892	9.02788160	4.14911435		77.00000000	0.44597403	4.02620070	1.667360
78	0.46945810	9.00693890	4.22838042		78.00000000	0.44025641	3.96536259	1.688838
79	0.47956696	9.00038530	4.31628742		79.00000000	0.43468354	3.91231938	1.710200
80	0.48938107	8.99507520	4.40201953		80.00000000	0.42925000	3.86113603	1.731589
81	0.49956140	8.99090480	4.49150899		81.00000000	0.42395062	3.81169964	1.752940
82	0.50936735	8.96592710	4.56695053		82.00000000	0.41878049	3.75475532	1.774525
83	0.51950520	8.94952870	4.64932670		83.00000000	0.41373494	3.70273272	1.795927
84	0.52927542	8.90878390	4.71520034		84.00000000	0.40880952	3.64199570	1.817315
85	0.53941703	8.85678290	4.77749953		85.00000000	0.40400000	3.57814029	1.838806
86	0.54957503	8.79516220	4.83360153		86.00000000	0.39930233	3.51192872	1.860201
87	0.55938244	8.69399170	4.86326629		87.00000000	0.39471264	3.43162845	1.881549
88	0.56950617	8.55321220	4.87110712		88.00000000	0.39022727	3.33769667	1.902922
89	0.57933742	8.35340310	4.83943900		89.00000000	0.38584270	3.22309958	1.924420
90	0.58947903	8.08923530	4.76843458		90.00000000	0.38155556	3.08649267	1.945807
91	0.59924924	7.70619490	4.61793144		91.00000000	0.37736264	2.90803003	1.967162
92	0.60936701	7.20538330	4.39072288		92.00000000	0.37326087	2.68948764	1.988643
93	0.61914617	6.56670280	4.06574889		93.00000000	0.36924731	2.42473736	2.010135
94	0.62929076	5.69694230	3.58503315		94.00000000	0.36531915	2.08120211	2.031522
95	0.63938397	4.59128950	2.93559691		95.00000000	0.36147368	1.65963033	2.052867
96	0.64916611	3.23866300	2.10243026		96.00000000	0.35770833	1.15849674	2.074239
97	0.65928537	1.52360400	1.00448983		97.00000000	0.35402062	0.53938723	2.095713
98	0.66900420	-0.48490980	-0.32440669		98.00000000	0.35040816	-0.16991635	2.117091
99	0.67904758	-3.00232890	-2.03872417		99.00000000	0.34686869	-1.04141388	2.138438
100	0.68880665	-5.90483140	-4.06728714		100.00000000	0.34340000	-2.02771910	2.159821
101	0.69916779	-9.48732760	-6.63323387		101.00000000	0.34000000	-3.22569138	2.181335
11:24 02/04/2018
Test Lot:	JK-PERC
Recipe:	Recipe_YJX-LID
Cell Name:	1-5
Test Order:	3
Test Condition:	Light
1	-0.29984936	9.02789120	-2.70700740		1.00000000	34.34000000	310.01778381	0.000000
2	-0.28997019	9.02733710	-2.61765865		2.00000000	17.17000000	154.99937801	0.021590
3	-0.27985808	9.03863050	-2.52953378		3.00000000	11.44666667	103.46219046	0.042982
4	-0.27005336	9.01742460	-2.43518581		4.00000000	8.58500000	77.41459019	0.064365
5	-0.25994569	9.03484730	-2.34856962		5.00000000	6.86800000	62.05133126	0.085784
6	-0.24974872	9.01507660	-2.25150384		6.00000000	5.72333333	51.59628841	0.107284
7	-0.23992911	9.04276280	-2.16962203		7.00000000	4.90571429	44.36121065	0.128665
8	-0.22978051	9.01697730	-2.07192564		8.00000000	4.29250000	38.70537506	0.150052
9	-0.21994825	9.02984050	-1.98609762		9.00000000	3.81555556	34.45385809	0.171490
10	-0.20984580	9.03142260	-1.89520610		10.00000000	3.43400000	31.01390521	0.192958
11	-0.20002247	9.02242760	-1.80468825		11.00000000	3.12181818	28.16637853	0.214353
12	-0.18987387	9.03288270	-1.71510840		12.00000000	2.86166667	25.84909933	0.235740
13	-0.18009074	9.02206230	-1.62478988		13.00000000	2.64153846	23.83212457	0.257091
14	-0.16994289	9.02378270	-1.53352771		14.00000000	2.45285714	22.13404985	0.278586
15	-0.16012327	9.03007600	-1.44592530		15.00000000	2.28933333	20.67285399	0.299971
16	-0.14996351	9.02202420	-1.35297442		16.00000000	2.14625000	19.36351944	0.321356
17	-0.13982905	9.02705570	-1.26224462		17.00000000	2.02000000	18.23465251	0.342736
18	-0.13001391	9.03062150	-1.17410641		18.00000000	1.90777778	17.22841902	0.364227
19	-0.11984671	9.03183170	-1.08243531		19.00000000	1.80736842	16.32384740	0.385635
20	-0.11003529	9.01578040	-0.99205401		20.00000000	1.71700000	15.48009495	0.407028
21	-0.09986660	9.03069500	-0.90186480		21.00000000	1.63523810	14.76733649	0.428368
22	-0.09003061	9.03201200	-0.81315756		22.00000000	1.56090909	14.09814964	0.449853
23	-0.07990211	9.01640800	-0.72043004		23.00000000	1.49304348	13.46188916	0.471228
24	-0.07008547	9.03208540	-0.63301798		24.00000000	1.43083333	12.92340886	0.492612
25	-0.05995102	9.01108460	-0.54022373		25.00000000	1.37360000	12.37762581	0.514104
26	-0.04978085	9.03329850	-0.44968524		26.00000000	1.32076923	11.93090271	0.535487
27	-0.03995528	9.01933190	-0.36036990		27.00000000	1.27185185	11.47125398	0.556854
28	-0.02982455	9.03330710	-0.26941429		28.00000000	1.22642857	11.07870592	0.578243
29	-0.01998558	9.02982430	-0.18046630		29.00000000	1.18413793	10.69255746	0.599735
30	-0.00985932	9.02690700	-0.08899915		30.00000000	1.14466667	10.33279955	0.621130
31	-0.00061580	9.02887440	-0.00555996		31.00000000	1.10774194	10.00166280	0.642591
32	0.00952366	9.02374740	0.08593907		32.00000000	1.07312500	9.68360893	0.663969
33	0.01933182	9.03139310	0.17459330		33.00000000	1.04060606	9.39812240	0.685454
34	0.02948683	9.03167150	0.26631534		34.00000000	1.01000000	9.12198822	0.706831
35	0.03931435	9.02106570	0.35465732		35.00000000	0.98114286	8.85095418	0.728177
36	0.04946265	9.02055170	0.44618043		36.00000000	0.95388889	8.60460404	0.749561
37	0.05925072	9.02653120	0.53482851		37.00000000	0.92810811	8.37759679	0.771040
38	0.06941243	9.02316190	0.62631955		38.00000000	0.90368421	8.15408894	0.792412
39	0.07956445	9.01937870	0.71762192		39.00000000	0.88051282	7.94167858	0.813771
40	0.08938602	9.02416520	0.80663417		40.00000000	0.85850000	7.74724582	0.835151
41	0.09952093	9.02414130	0.89809093		41.00000000	0.83756098	7.55826859	0.856626
42	0.10934175	9.02155690	0.98643282		42.00000000	0.81761905	7.37619676	0.878001
43	0.11949378	9.02551650	1.07849308		43.00000000	0.79860465	7.20781946	0.899345
44	0.12932204	9.01585580	1.16594886		44.00000000	0.78045455	7.03646564	0.920727
45	0.13945918	9.02939320	1.25923177		45.00000000	0.76311111	6.89043028	0.942204
46	0.14926511	9.01544380	1.34569121		46.00000000	0.74652174	6.73022478	0.963588
47	0.15943277	9.03185180	1.43997315		47.00000000	0.73063830	6.59901683	0.984968
48	0.16956842	9.02493100	1.53034329		48.00000000	0.71541667	6.45658605	1.006330
49	0.17935650	9.03193860	1.61993690		49.00000000	0.70081633	6.32973003	1.027815
50	0.18952563	9.02963070	1.71134645		50.00000000	0.68680000	6.20155036	1.049194
51	0.19931073	9.01297660	1.79638295		51.00000000	0.67333333	6.06873758	1.070576
52	0.20947541	9.01622960	1.88867839		52.00000000	0.66038462	5.95417932	1.091940
53	0.21929176	9.03033640	1.98027836		53.00000000	0.64792453	5.85097645	1.113514
54	0.22944751	9.02086070	2.06981403		54.00000000	0.63592593	5.73659919	1.134934
55	0.23924080	9.02223400	2.15848648		55.00000000	0.62436364	5.63315483	1.156326
56	0.24938241	9.02342410	2.25028325		56.00000000	0.61321429	5.53329256	1.177809
57	0.25953072	9.01903820	2.34071748		57.00000000	0.60245614	5.43357494	1.199190
58	0.26933888	9.03088380	2.43236813		58.00000000	0.59206897	5.34690603	1.220547
59	0.27956161	9.01124480	2.51919810		59.00000000	0.58203390	5.24484994	1.241923
60	0.28936681	9.02109240	2.61040473		60.00000000	0.57233333	5.16307188	1.263403
61	0.29949278	9.02312850	2.70236184		61.00000000	0.56295082	5.07957759	1.284785
62	0.30930614	9.01700400	2.78901470		62.00000000	0.55387097	4.99425673	1.306132
63	0.31947529	9.02551360	2.88342857		63.00000000	0.54507937	4.91962122	1.327512
64	0.32929093	9.01291660	2.96787169		64.00000000	0.53656250	4.83599306	1.349008
65	0.33941391	9.02216240	3.06224742		65.00000000	0.52830769	4.76647780	1.370383
66	0.34925556	9.02265260	3.15121159		66.00000000	0.52030303	4.69451349	1.391728
67	0.35940462	9.02786450	3.24465621		67.00000000	0.51253731	4.62711742	1.413109
68	0.36954251	9.02146150	3.33381353		68.00000000	0.50500000	4.55583806	1.434595
69	0.37940797	9.02105620	3.42266062		69.00000000	0.49768116	4.48960971	1.455972
70	0.38954586	9.01896000	3.51329853		70.00000000	0.49057143	4.42444409	1.477329
71	0.39936149	9.01440240	3.60000517		71.00000000	0.48366197	4.35992364	1.498702
72	0.40951350	9.02097230	3.69420994		72.00000000	0.47694444	4.30250262	1.520175
73	0.41934103	9.01432510	3.78007637		73.00000000	0.47041096	4.24043731	1.541545
74	0.42946255	9.01583100	3.87196177		74.00000000	0.46405405	4.18383293	1.562892
75	0.43926996	9.00840760	3.95712285		75.00000000	0.45786667	4.12464956	1.584278
76	0.44941232	9.03144930	4.05884458		76.00000000	0.45184211	4.08078907	1.605762
77	0.45957401	9.00521180	4.13856130		77.00000000	0.44597403	4.01609056	1.627143
78	0.46943727	9.00678540	4.22812075		78.00000000	0.44025641	3.96529501	1.648511
79	0.47954166	8.99157240	4.31183355		79.00000000	0.43468354	3.90848856	1.669883
80	0.48942277	8.99138360	4.40058787		80.00000000	0.42925000	3.85955141	1.691359
81	0.49953014	8.96200180	4.47679001		81.00000000	0.42395062	3.79944620	1.712761
82	0.50932342	8.95979210	4.56343195		82.00000000	0.41878049	3.75218611	1.734149
83	0.51949328	8.93400860	4.64115743		83.00000000	0.41373494	3.69631151	1.755500
84	0.52926797	8.89708710	4.70894323		84.00000000	0.40880952	3.63721394	1.776995
85	0.53942150	8.85027120	4.77402657		85.00000000	0.40400000	3.57550956	1.798375
86	0.54953480	8.77164650	4.82032501		86.00000000	0.39930233	3.50253885	1.819774
87	0.55938244	8.68475630	4.85810017		87.00000000	0.39471264	3.42798312	1.841270
88	0.56950468	8.53621480	4.86141428		88.00000000	0.39022727	3.33106382	1.862645
89	0.57932180	8.34446430	4.83413008		89.00000000	0.38584270	3.21965061	1.884054
90	0.58943212	8.06150250	4.75170851		90.00000000	0.38155556	3.07591107	1.905444
91	0.59923285	7.69071100	4.60852667		91.00000000	0.37736264	2.90218699	1.926927
92	0.60937297	7.19067810	4.38180487		92.00000000	0.37326087	2.68399876	1.948316
93	0.61913055	6.52776530	4.04153892		93.00000000	0.36924731	2.41035979	1.969669
94	0.62926245	5.66916320	3.56739152		94.00000000	0.36531915	2.07105388	1.991142
95	0.63937652	4.56434870	2.91833739		95.00000000	0.36147368	1.64989194	2.012644
96	0.64916235	3.20706030	2.08190280		96.00000000	0.35770833	1.14719219	2.034035
97	0.65929949	1.48944210	0.98198842		97.00000000	0.35402062	0.52729321	2.055430
98	0.66900271	-0.53816599	-0.36003451		98.00000000	0.35040816	-0.18857776	2.076869
99	0.67908478	-3.04511930	-2.06789417		99.00000000	0.34686869	-1.05625653	2.098367
100	0.68880588	-5.94814250	-4.09711553		100.00000000	0.34340000	-2.04259213	2.119756
101	0.69912761	-9.51780130	-6.65415768		101.00000000	0.34000000	-3.23605244	2.141109
11:24 02/04/2018
Test Lot:	JK-PERC
Recipe:	Recipe_YJX-LID
Cell Name:	1-5
Test Order:	4
Test Condition:	Light
1	-0.29986703	9.02668860	-2.70680630		1.00000000	34.34000000	309.97648652	0.000000
2	-0.29007125	9.02961730	-2.61923238		2.00000000	17.17000000	155.03852904	0.061816
3	-0.27992043	9.03006080	-2.52769850		3.00000000	11.44666667	103.36409596	0.083234
4	-0.27007326	9.02537630	-2.43751280		4.00000000	8.58500000	77.48285554	0.104724
5	-0.25995296	9.02904320	-2.34712651		5.00000000	6.86800000	62.01146870	0.126120
6	-0.24978355	9.02938370	-2.25539151		6.00000000	5.72333333	51.67817271	0.147472
7	-0.23996319	9.03307150	-2.16760465		7.00000000	4.90571429	44.31366790	0.168847
8	-0.22982502	9.02613740	-2.07443221		8.00000000	4.29250000	38.74469479	0.190329
9	-0.21999499	9.01515670	-1.98328931		9.00000000	3.81555556	34.39783123	0.211706
10	-0.20985386	9.03189850	-1.89537876		10.00000000	3.43400000	31.01553945	0.233051
11	-0.20002234	9.01489640	-1.80318067		11.00000000	3.12181818	28.14286749	0.254432
12	-0.18989384	9.01840210	-1.71253901		12.00000000	2.86166667	25.80766068	0.275920
13	-0.18008615	9.02589230	-1.62543819		13.00000000	2.64153846	23.84224166	0.297296
14	-0.16992268	9.02217100	-1.53307148		14.00000000	2.45285714	22.13009658	0.318652
15	-0.16010158	9.02586360	-1.44505502		15.00000000	2.28933333	20.66321040	0.340024
16	-0.14997384	9.01582050	-1.35213722		16.00000000	2.14625000	19.35020475	0.361491
17	-0.13979621	9.02646450	-1.26186553		17.00000000	2.02000000	18.23345829	0.382873
18	-0.12996767	9.03029820	-1.17364682		18.00000000	1.90777778	17.22780223	0.404221
19	-0.11983621	9.02127270	-1.08107513		19.00000000	1.80736842	16.30476340	0.425604
20	-0.11001810	9.02177330	-0.99255836		20.00000000	1.71700000	15.49038476	0.447080
21	-0.09987323	9.02101230	-0.90095764		21.00000000	1.63523810	14.75150297	0.468448
22	-0.09002832	9.02345090	-0.81236609		22.00000000	1.56090909	14.08478654	0.489832
23	-0.07989164	9.02396490	-0.72093933		23.00000000	1.49304348	13.47317194	0.511189
24	-0.07005864	9.03194330	-0.63276563		24.00000000	1.43083333	12.92320554	0.532669
25	-0.05991823	9.01341060	-0.54006763		25.00000000	1.37360000	12.38082080	0.554054
26	-0.04980165	9.02198890	-0.44930994		26.00000000	1.32076923	11.91596534	0.575437
27	-0.03994855	9.03263090	-0.36084053		27.00000000	1.27185185	11.48816834	0.596852
28	-0.02983792	9.00566580	-0.26871036		28.00000000	1.22642857	11.04480584	0.618332
29	-0.02001683	9.02760310	-0.18070400		29.00000000	1.18413793	10.68992726	0.639707
30	-0.00987792	9.00945090	-0.08899461		30.00000000	1.14466667	10.31281813	0.661117
31	-0.00063813	9.02588370	-0.00575964		31.00000000	1.10774194	9.99834988	0.682590
32	0.00948048	9.01035690	0.08542253		32.00000000	1.07312500	9.66923925	0.704090
33	0.01932065	9.02543830	0.17437732		33.00000000	1.04060606	9.39192579	0.725477
34	0.02946820	9.02009490	0.26580599		34.00000000	1.01000000	9.11029585	0.746841
35	0.03927562	9.03013420	0.35466412		35.00000000	0.98114286	8.85985167	0.768213
36	0.04942541	9.02110580	0.44587183		36.00000000	0.95388889	8.60513259	0.789684
37	0.05923580	9.02329730	0.53450223		37.00000000	0.92810811	8.37459539	0.811099
38	0.06939601	9.02800370	0.62650745		38.00000000	0.90368421	8.15846440	0.832491
39	0.07953761	9.02663800	0.71795719		39.00000000	0.88051282	7.94807049	0.853847
40	0.08935768	9.01782510	0.80581195		40.00000000	0.85850000	7.74180285	0.875332
41	0.09953798	9.02656840	0.89848642		41.00000000	0.83756098	7.56030144	0.896720
42	0.10932083	9.01853940	0.98591421		42.00000000	0.81761905	7.37372960	0.918119
43	0.11948774	9.02784630	1.07871695		43.00000000	0.79860465	7.20968005	0.939612
44	0.12932716	9.02188010	1.16677413		44.00000000	0.78045455	7.04116733	0.960985
45	0.13942932	9.01580910	1.25706813		45.00000000	0.76311111	6.88006410	0.982343
46	0.14924939	9.02195070	1.34652064		46.00000000	0.74652174	6.73508233	1.003718
47	0.15942225	9.01965900	1.43793433		47.00000000	0.73063830	6.59010830	1.025210
48	0.16960478	9.01752280	1.52941497		48.00000000	0.71541667	6.45128610	1.046598
49	0.17941815	9.02894120	1.61995593		49.00000000	0.70081633	6.32762940	1.067933
50	0.18955305	9.01260850	1.70836743		50.00000000	0.68680000	6.18985952	1.089307
51	0.19931284	9.02567670	1.79893326		51.00000000	0.67333333	6.07728898	1.110793
52	0.20947677	9.01705930	1.88886446		52.00000000	0.66038462	5.95472724	1.132177
53	0.21929684	9.03248120	1.98079458		53.00000000	0.64792453	5.85236612	1.153542
54	0.22942281	9.01704220	2.06871516		54.00000000	0.63592593	5.73417091	1.174918
55	0.23929870	9.01819230	2.15804169		55.00000000	0.62436364	5.63063134	1.196396
56	0.24941127	9.01721760	2.24899569		56.00000000	0.61321429	5.52948665	1.217794
57	0.25955808	9.02415660	2.34229276		57.00000000	0.60245614	5.43665856	1.239136
58	0.26936772	9.01486300	2.42831309		58.00000000	0.59206897	5.33742061	1.260505
59	0.27955621	9.02653120	2.52342285		59.00000000	0.58203390	5.25374714	1.282002
60	0.28934354	9.01688860	2.60897847		60.00000000	0.57233333	5.16066591	1.303381
61	0.29949260	9.02647110	2.70336130		61.00000000	0.56295082	5.08145930	1.324744
62	0.30932233	9.01233480	2.78771640		62.00000000	0.55387097	4.99167060	1.346124
63	0.31947732	9.02690510	2.88389145		63.00000000	0.54507937	4.92037970	1.367595
64	0.32926166	9.00617980	2.96538971		64.00000000	0.53656250	4.83237835	1.388983
65	0.33943230	9.03552820	3.06695012		65.00000000	0.52830769	4.77353905	1.410348
66	0.34924492	9.00630860	3.14540753		66.00000000	0.52030303	4.68600966	1.431708
67	0.35939917	9.02009960	3.24181631		67.00000000	0.51253731	4.62313762	1.453178
68	0.36956906	9.02140330	3.33403154		68.00000000	0.50500000	4.55580867	1.474549
69	0.37937647	9.00740340	3.41719691		69.00000000	0.49768116	4.48281497	1.495972
70	0.38950989	9.01456930	3.51126390		70.00000000	0.49057143	4.42229014	1.517337
71	0.39936197	9.01971720	3.60213203		71.00000000	0.48366197	4.36249421	1.538816
72	0.40948719	9.01800350	3.69275691		72.00000000	0.47694444	4.30108667	1.560232
73	0.41933107	9.00914000	3.77781232		73.00000000	0.47041096	4.23799819	1.581631
74	0.42946747	9.02156640	3.87446930		74.00000000	0.46405405	4.18649446	1.603123
75	0.43924361	9.00346950	3.95471645		75.00000000	0.45786667	4.12238857	1.624504
76	0.44943061	9.00827600	4.04859498		76.00000000	0.45184211	4.07031839	1.645865
77	0.45955214	9.00145720	4.13663892		77.00000000	0.44597403	4.01441611	1.667228
78	0.46940124	8.99543090	4.22246642		78.00000000	0.44025641	3.96029612	1.688712
79	0.47960013	8.99134060	4.31224812		79.00000000	0.43468354	3.90838780	1.710099
80	0.48939043	8.98365880	4.39651664		80.00000000	0.42925000	3.85623554	1.731447
81	0.49952236	8.98347190	4.48744508		81.00000000	0.42395062	3.80854846	1.752840
82	0.50935358	8.96744730	4.56760139		82.00000000	0.41878049	3.75539195	1.774328
83	0.51948923	8.93004320	4.63906127		83.00000000	0.41373494	3.69467089	1.795709
84	0.52929217	8.89698510	4.70910455		84.00000000	0.40880952	3.63717224	1.817072
85	0.53939956	8.84843640	4.77284270		85.00000000	0.40400000	3.57476831	1.838450
86	0.54953372	8.75983720	4.81382592		86.00000000	0.39930233	3.49782337	1.859914
87	0.55935454	8.68185520	4.85623512		87.00000000	0.39471264	3.42683802	1.881308
88	0.56950057	8.53090480	4.85835515		88.00000000	0.39022727	3.32899171	1.902659
89	0.57932287	8.30968480	4.81399045		89.00000000	0.38584270	3.20623119	1.924035
90	0.58942431	8.06544880	4.75397159		90.00000000	0.38155556	3.07741680	1.945516
91	0.59923023	7.67531490	4.59928071		91.00000000	0.37736264	2.89637707	1.966886
92	0.60935473	7.18404630	4.37763259		92.00000000	0.37326087	2.68152337	1.988346
93	0.61914057	6.52557180	4.04024624		93.00000000	0.36924731	2.40954985	2.009798
94	0.62927246	5.65209870	3.55671005		94.00000000	0.36531915	2.06481989	2.031305
95	0.63936567	4.55572890	2.91277666		95.00000000	0.36147368	1.64677611	2.052690
96	0.64917308	3.18515210	2.06771500		96.00000000	0.35770833	1.13935545	2.074056
97	0.65928268	1.46362360	0.96494169		97.00000000	0.35402062	0.51815293	2.095419
98	0.66895616	-0.58364844	-0.39043522		98.00000000	0.35040816	-0.20451518	2.116902
99	0.67905754	-3.09503820	-2.10170903		99.00000000	0.34686869	-1.07357184	2.138287
100	0.68881363	-6.02338650	-4.14899072		100.00000000	0.34340000	-2.06843092	2.159668
101	0.69912118	-9.62334250	-6.72788256		101.00000000	0.34000000	-3.27193645	2.181029
