# Supplementary material for: Study on the Electrical Injection Regeneration of Industrialized B-Doped Czochralski Silicon PERC Solar Cells
Source: Hindawi journal article supplement (doi:10.1155/2019/5357370), 2019-06-20
Supplement: f1 [file 5357370.f1.zip › section3.2/IVRawData_1-10-1.5h.csv]

15:02 02/04/2018
Test Lot:	JK-PERC
Recipe:	Recipe_YJX-LID
Cell Name:	1-10-1.5h
Test Order:	2
Test Condition:	Light
1	-0.29996103	8.90691660	-2.67172788		1.00000000	34.34000000	305.86351604	0.000000
2	-0.29012311	8.91859050	-2.58748921		2.00000000	17.17000000	153.13219889	0.061800
3	-0.27997926	8.90459060	-2.49310069		3.00000000	11.44666667	101.92788040	0.083234
4	-0.27020013	8.91151330	-2.40789205		4.00000000	8.58500000	76.50534168	0.104743
5	-0.25999528	8.91575720	-2.31805479		5.00000000	6.86800000	61.23342045	0.126121
6	-0.24986336	8.89998250	-2.22377953		6.00000000	5.72333333	50.93756651	0.147481
7	-0.24005669	8.91750240	-2.14070611		7.00000000	4.90571429	43.74671892	0.168859
8	-0.22993444	8.90950680	-2.04860246		8.00000000	4.29250000	38.24405794	0.190326
9	-0.22009353	8.91016960	-1.96107068		9.00000000	3.81555556	33.99724712	0.211709
10	-0.20995045	8.91484260	-1.87167522		10.00000000	3.43400000	30.61356949	0.233063
11	-0.20012443	8.89714240	-1.78053555		11.00000000	3.12181818	27.77526091	0.254487
12	-0.18998060	8.91170310	-1.69305070		12.00000000	2.86166667	25.50232370	0.275974
13	-0.18018733	8.92296790	-1.60780576		13.00000000	2.64153846	23.57036290	0.297349
14	-0.17004797	8.89960860	-1.51336038		14.00000000	2.45285714	21.82946852	0.318692
15	-0.16023980	8.91436860	-1.42843664		15.00000000	2.28933333	20.40796118	0.340062
16	-0.15008779	8.91339210	-1.33779132		16.00000000	2.14625000	19.13036779	0.361551
17	-0.13994470	8.91338060	-1.24738037		17.00000000	2.02000000	18.00502881	0.382923
18	-0.13010231	8.90644450	-1.15874900		18.00000000	1.90777778	16.99151690	0.404267
19	-0.11995922	8.91000940	-1.06883778		19.00000000	1.80736842	16.10366962	0.425632
20	-0.11015255	8.92056470	-0.98262295		20.00000000	1.71700000	15.31660959	0.447107
21	-0.09998118	8.89663030	-0.88949560		21.00000000	1.63523810	14.54810879	0.468498
22	-0.09013581	8.91704560	-0.80374515		22.00000000	1.56090909	13.91869754	0.489879
23	-0.07999124	8.92229080	-0.71370507		23.00000000	1.49304348	13.32136809	0.511239
24	-0.07016001	8.91049670	-0.62516053		24.00000000	1.43083333	12.74943569	0.532729
25	-0.06001246	8.90814500	-0.53459966		25.00000000	1.37360000	12.23622797	0.554102
26	-0.04987533	8.89511110	-0.44364657		26.00000000	1.32076923	11.74838905	0.575497
27	-0.04006866	8.91241070	-0.35710832		27.00000000	1.27185185	11.33526605	0.596912
28	-0.02989952	8.90773300	-0.26633695		28.00000000	1.22642857	10.92469826	0.618374
29	-0.02006308	8.92329690	-0.17902882		29.00000000	1.18413793	10.56641433	0.639731
30	-0.00994009	8.91181660	-0.08858426		30.00000000	1.14466667	10.20105940	0.661086
31	-0.00065070	8.90913300	-0.00579714		31.00000000	1.10774194	9.86902023	0.682561
32	0.00948176	8.90919020	0.08447482		32.00000000	1.07312500	9.56067473	0.704051
33	0.01930825	8.91695500	0.17217077		33.00000000	1.04060606	9.27903742	0.725442
34	0.02944658	8.89625450	0.26196425		34.00000000	1.01000000	8.98521705	0.746813
35	0.03924627	8.91462520	0.34986578		35.00000000	0.98114286	8.74652084	0.768180
36	0.04941958	8.90985390	0.44032126		36.00000000	0.95388889	8.49901064	0.789668
37	0.05925128	8.90562340	0.52766954		37.00000000	0.92810811	8.26538129	0.811048
38	0.06935314	8.91241260	0.61810381		38.00000000	0.90368421	8.05400654	0.832431
39	0.07953836	8.90382290	0.70819547		39.00000000	0.88051282	7.83993022	0.853820
40	0.08935145	8.90747260	0.79589555		40.00000000	0.85850000	7.64706523	0.875304
41	0.09948010	8.90283010	0.88565443		41.00000000	0.83756098	7.45666306	0.896680
42	0.10930510	8.91969870	0.97496856		42.00000000	0.81761905	7.29291556	0.918065
43	0.11944194	8.90881250	1.06408585		43.00000000	0.79860465	7.11461910	0.939541
44	0.12928256	8.90506940	1.15127017		44.00000000	0.78045455	6.95000189	0.960925
45	0.13941346	8.89866260	1.24059334		45.00000000	0.76311111	6.79066830	0.982292
46	0.14924292	8.91047860	1.32982584		46.00000000	0.74652174	6.65186598	1.003667
47	0.15940805	8.90624240	1.41972673		47.00000000	0.73063830	6.50724179	1.025155
48	0.16954191	8.91087910	1.51076746		48.00000000	0.71541667	6.37499142	1.046547
49	0.17935798	8.91167640	1.59838028		49.00000000	0.70081633	6.24544832	1.067891
50	0.18950076	8.90185360	1.68690802		50.00000000	0.68680000	6.11379305	1.089260
51	0.19928706	8.91661170	1.77696533		51.00000000	0.67333333	6.00385188	1.110751
52	0.20943061	8.91104890	1.86624641		52.00000000	0.66038462	5.88471960	1.132128
53	0.21926007	8.90939710	1.95347503		53.00000000	0.64792453	5.77261691	1.153473
54	0.22939914	8.90888120	2.04368969		54.00000000	0.63592593	5.66538853	1.174851
55	0.23922861	8.90518280	2.13037450		55.00000000	0.62436364	5.56007232	1.196330
56	0.24938628	8.90898610	2.22177890		56.00000000	0.61321429	5.46311755	1.217724
57	0.25950229	8.90007310	2.30958935		57.00000000	0.60245614	5.36190369	1.239076
58	0.26933250	8.91795350	2.40189471		58.00000000	0.59206897	5.28004350	1.260471
59	0.27948049	8.91281990	2.49095927		59.00000000	0.58203390	5.18756331	1.281944
60	0.28933674	8.90394970	2.57623978		60.00000000	0.57233333	5.09602721	1.303310
61	0.29948848	8.91201020	2.66904439		61.00000000	0.56295082	5.01702345	1.324649
62	0.30928892	8.90202710	2.75329835		62.00000000	0.55387097	4.93057436	1.346030
63	0.31943321	8.90192030	2.84356898		63.00000000	0.54507937	4.85225307	1.367505
64	0.32926640	8.89670370	2.92938560		64.00000000	0.53656250	4.77363758	1.388876
65	0.33940694	8.90768620	3.02333052		65.00000000	0.52830769	4.70599914	1.410242
66	0.34922376	8.89192680	3.10527211		66.00000000	0.52030303	4.62649646	1.431605
67	0.35938516	8.91067220	3.20236335		67.00000000	0.51253731	4.56705199	1.453083
68	0.36953318	8.89973740	3.28874826		68.00000000	0.50500000	4.49436739	1.474482
69	0.37934476	8.91293330	3.38107454		69.00000000	0.49768116	4.43579898	1.495856
70	0.38950098	8.89100270	3.46305426		70.00000000	0.49057143	4.36167190	1.517214
71	0.39932075	8.90674690	3.55664885		71.00000000	0.48366197	4.30785477	1.538705
72	0.40945089	8.90540120	3.64632445		72.00000000	0.47694444	4.24738163	1.560102
73	0.41928184	8.89328860	3.72879441		73.00000000	0.47041096	4.18350042	1.581496
74	0.42941794	8.90179540	3.82259064		74.00000000	0.46405405	4.13091424	1.602976
75	0.43923700	8.89986230	3.90914882		75.00000000	0.45786667	4.07495029	1.624354
76	0.44940954	8.89364910	3.99689075		76.00000000	0.45184211	4.01852513	1.645708
77	0.45954266	8.88386630	4.08251555		77.00000000	0.44597403	3.96197362	1.667093
78	0.46938479	8.88539030	4.17066706		78.00000000	0.44025641	3.91185004	1.688575
79	0.47954246	8.88121320	4.25891883		79.00000000	0.43468354	3.86051723	1.709964
80	0.48935854	8.86092090	4.33616731		80.00000000	0.42925000	3.80355030	1.731324
81	0.49949017	8.83432580	4.41265890		81.00000000	0.42395062	3.74531788	1.752696
82	0.50929803	8.81559090	4.48976308		82.00000000	0.41878049	3.69179746	1.774179
83	0.51945204	8.79059790	4.56629401		83.00000000	0.41373494	3.63697749	1.795557
84	0.52921373	8.71625800	4.61276341		84.00000000	0.40880952	3.56328928	1.816908
85	0.53936994	8.64246850	4.66148772		85.00000000	0.40400000	3.49155727	1.838275
86	0.54951274	8.53032970	4.68752485		86.00000000	0.39930233	3.40618049	1.859755
87	0.55932879	8.39967540	4.69818028		87.00000000	0.39471264	3.31545808	1.881133
88	0.56943440	8.16751770	4.65086554		88.00000000	0.39022727	3.18718816	1.902484
89	0.57925642	7.86894940	4.55813946		89.00000000	0.38584270	3.03617666	1.923853
90	0.58936644	7.47869920	4.40769432		90.00000000	0.38155556	2.85353923	1.945319
91	0.59918028	6.95415210	4.16679080		91.00000000	0.37736264	2.62423718	1.966694
92	0.60932082	6.28037210	3.82676148		92.00000000	0.37326087	2.34421715	1.988159
93	0.61908406	5.43908260	3.36724934		93.00000000	0.36924731	2.00836663	2.009566
94	0.62920153	4.35304160	2.73894043		94.00000000	0.36531915	1.59024945	2.031086
95	0.63932502	3.06228800	1.95779734		95.00000000	0.36147368	1.10693653	2.052516
96	0.64914852	1.54902090	1.00554462		96.00000000	0.35770833	0.55409768	2.073900
97	0.65913796	-0.28711081	-0.18924563		97.00000000	0.35402062	-0.10164315	2.095275
98	0.66896445	-2.35563300	-1.57583473		98.00000000	0.35040816	-0.82543303	2.116762
99	0.67899936	-4.84887550	-3.29238336		99.00000000	0.34686869	-1.68192308	2.138145
100	0.68888611	-7.65108250	-5.27072446		100.00000000	0.34340000	-2.62738173	2.159529
101	0.69624764	-9.99517250	-6.95911526		101.00000000	0.34000000	-3.39835865	2.180885
15:02 02/04/2018
Test Lot:	JK-PERC
Recipe:	Recipe_YJX-LID
Cell Name:	1-10-1.5h
Test Order:	3
Test Condition:	Light
1	-0.29991955	8.90293030	-2.67016285		1.00000000	34.34000000	305.72662650	0.000000
2	-0.29016662	8.91726300	-2.58749206		2.00000000	17.17000000	153.10940571	0.061731
3	-0.27998793	8.91116430	-2.49501845		3.00000000	11.44666667	102.00312735	0.083246
4	-0.27016726	8.91468620	-2.40845634		4.00000000	8.58500000	76.53258103	0.104689
5	-0.26002210	8.90819930	-2.31632869		5.00000000	6.86800000	61.18151279	0.126056
6	-0.24985383	8.91646860	-2.22781383		6.00000000	5.72333333	51.03192195	0.147445
7	-0.24002573	8.90037350	-2.13631865		7.00000000	4.90571429	43.66268943	0.168940
8	-0.22988205	8.92077920	-2.05072701		8.00000000	4.29250000	38.29244472	0.190324
9	-0.22006285	8.90785880	-1.96028879		9.00000000	3.81555556	33.98843013	0.211684
10	-0.20991173	8.91773030	-1.87193619		10.00000000	3.43400000	30.62348585	0.233065
11	-0.20011041	8.91453550	-1.78389135		11.00000000	3.12181818	27.82955901	0.254598
12	-0.18992430	8.90420530	-1.69112496		12.00000000	2.86166667	25.48086750	0.275982
13	-0.18015721	8.90676690	-1.60461827		13.00000000	2.64153846	23.52756733	0.297327
14	-0.16999790	8.90974900	-1.51463862		14.00000000	2.45285714	21.85434148	0.318707
15	-0.16019434	8.89689350	-1.42523198		15.00000000	2.28933333	20.36795485	0.340191
16	-0.15004842	8.91539000	-1.33774018		16.00000000	2.14625000	19.13465579	0.361570
17	-0.13986827	8.91361140	-1.24673141		17.00000000	2.02000000	18.00549503	0.382939
18	-0.13002974	8.91560550	-1.15929387		18.00000000	1.90777778	17.00899405	0.404303
19	-0.11990614	8.90979960	-1.06833968		19.00000000	1.80736842	16.10329043	0.425779
20	-0.11006761	8.91002940	-0.98070564		20.00000000	1.71700000	15.29852048	0.447170
21	-0.09995741	8.90367790	-0.88998862		21.00000000	1.63523810	14.55963329	0.468554
22	-0.09013748	8.90203570	-0.80240708		22.00000000	1.56090909	13.89526845	0.489895
23	-0.07998115	8.90501310	-0.71223317		23.00000000	1.49304348	13.29557173	0.511361
24	-0.07016196	8.89235120	-0.62390480		24.00000000	1.43083333	12.72347251	0.532729
25	-0.06000711	8.91086100	-0.53471502		25.00000000	1.37360000	12.23995867	0.554113
26	-0.04985970	8.89817910	-0.44366057		26.00000000	1.32076923	11.75244117	0.575602
27	-0.04002415	8.91018680	-0.35662262		27.00000000	1.27185185	11.33243758	0.596977
28	-0.02991246	8.90931030	-0.26649941		28.00000000	1.22642857	10.92663270	0.618340
29	-0.02006351	8.90748120	-0.17871532		29.00000000	1.18413793	10.54768636	0.639712
30	-0.00992875	8.90243430	-0.08839008		30.00000000	1.14466667	10.19031980	0.661194
31	-0.00065959	8.91021160	-0.00587706		31.00000000	1.10774194	9.87021504	0.682690
32	0.00948836	8.90620800	0.08450528		32.00000000	1.07312500	9.55747446	0.704053
33	0.01930875	8.90049840	0.17185750		33.00000000	1.04060606	9.26191258	0.725424
34	0.02943205	8.90566730	0.26211207		34.00000000	1.01000000	8.99472397	0.746910
35	0.03926659	8.89914700	0.34943912		35.00000000	0.98114286	8.73133451	0.768287
36	0.04940850	8.90109920	0.43978992		36.00000000	0.95388889	8.49065963	0.789624
37	0.05923038	8.90606310	0.52750947		37.00000000	0.92810811	8.26578937	0.811010
38	0.06938196	8.89167210	0.61692164		38.00000000	0.90368421	8.03526368	0.832496
39	0.07951717	8.92671200	0.70982688		39.00000000	0.88051282	7.86008436	0.853876
40	0.08933310	8.89991090	0.79505659		40.00000000	0.85850000	7.64057351	0.875236
41	0.09949287	8.90735440	0.88621825		41.00000000	0.83756098	7.46045244	0.896608
42	0.10930879	8.88985920	0.97173975		42.00000000	0.81761905	7.26851821	0.918077
43	0.11946707	8.92336750	1.06604857		43.00000000	0.79860465	7.12624279	0.939450
44	0.12929194	8.89357760	1.14986790		44.00000000	0.78045455	6.94103306	0.960793
45	0.13943979	8.91831110	1.24356743		45.00000000	0.76311111	6.80566229	0.982178
46	0.14924307	8.89573570	1.32762691		46.00000000	0.74652174	6.64086009	1.003655
47	0.15941252	8.91301540	1.42084625		47.00000000	0.73063830	6.51219040	1.025025
48	0.16955145	8.89513020	1.50818222		48.00000000	0.71541667	6.36372440	1.046406
49	0.17938003	8.91221620	1.59867361		49.00000000	0.70081633	6.24582662	1.067784
50	0.18950407	8.90286350	1.68712887		50.00000000	0.68680000	6.11448665	1.089267
51	0.19932373	8.91868110	1.77770478		51.00000000	0.67333333	6.00524527	1.110652
52	0.20946935	8.89929870	1.86413031		52.00000000	0.66038462	5.87695995	1.132036
53	0.21928528	8.90092950	1.95184282		53.00000000	0.64792453	5.76713055	1.153383
54	0.22943537	8.90324880	2.04272018		54.00000000	0.63592593	5.66180674	1.174850
55	0.23925428	8.91133790	2.13207573		55.00000000	0.62436364	5.56391534	1.196231
56	0.24939544	8.90654850	2.22125258		56.00000000	0.61321429	5.46162278	1.217617
57	0.25953364	8.90259840	2.31052377		57.00000000	0.60245614	5.36342507	1.239090
58	0.26936743	8.90536210	2.39881450		58.00000000	0.59206897	5.27258853	1.260462
59	0.27951676	8.90138150	2.48808532		59.00000000	0.58203390	5.18090577	1.281813
60	0.28932378	8.90548040	2.57656725		60.00000000	0.57233333	5.09690328	1.303190
61	0.29949546	8.89622500	2.66437900		61.00000000	0.56295082	5.00813716	1.324668
62	0.30930245	8.90678410	2.75489014		62.00000000	0.55387097	4.93320913	1.346059
63	0.31945625	8.89029690	2.84006091		63.00000000	0.54507937	4.84591739	1.367418
64	0.32927144	8.90370660	2.93173629		64.00000000	0.53656250	4.77739507	1.388788
65	0.33943048	8.90437700	3.02241696		65.00000000	0.52830769	4.70425086	1.410278
66	0.34920695	8.89079090	3.10472597		66.00000000	0.52030303	4.62590545	1.431658
67	0.35937789	8.89834210	3.19786741		67.00000000	0.51253731	4.56073235	1.453016
68	0.36953691	8.90441040	3.29050830		68.00000000	0.50500000	4.49672725	1.474404
69	0.37935209	8.91253470	3.38098867		69.00000000	0.49768116	4.43560060	1.495877
70	0.38950887	8.89736270	3.46560169		70.00000000	0.49057143	4.36479193	1.517256
71	0.39932406	8.90023140	3.55407654		71.00000000	0.48366197	4.30470347	1.538608
72	0.40947938	8.90381150	3.64592721		72.00000000	0.47694444	4.24662343	1.559979
73	0.41929975	8.89465430	3.72952632		73.00000000	0.47041096	4.18414286	1.581450
74	0.42944020	8.89651490	3.82052114		74.00000000	0.46405405	4.12846381	1.602821
75	0.43928066	8.88844590	3.90452238		75.00000000	0.45786667	4.06972310	1.624166
76	0.44940844	8.88991450	3.99520261		76.00000000	0.45184211	4.01683768	1.645540
77	0.45955855	8.88273810	4.08213824		77.00000000	0.44597403	3.96147047	1.667021
78	0.46940571	8.88688370	4.17155395		78.00000000	0.44025641	3.91250752	1.688407
79	0.47955358	8.86716560	4.25228101		79.00000000	0.43468354	3.85441097	1.709784
80	0.48937175	8.86420350	4.33789078		80.00000000	0.42925000	3.80495935	1.731147
81	0.49949729	8.83785340	4.41448382		81.00000000	0.42395062	3.74681340	1.752620
82	0.50932437	8.81409170	4.48923170		82.00000000	0.41878049	3.69116962	1.774000
83	0.51946998	8.77301980	4.55732042		83.00000000	0.41373494	3.62970482	1.795382
84	0.52923161	8.72713850	4.61867756		84.00000000	0.40880952	3.56773733	1.816731
85	0.53940552	8.63085170	4.65552905		85.00000000	0.40400000	3.48686409	1.838210
86	0.54952735	8.50871180	4.67576985		86.00000000	0.39930233	3.39754841	1.859588
87	0.55935293	8.36281680	4.67776608		87.00000000	0.39471264	3.30090953	1.880969
88	0.56948811	8.14999390	4.64132462		88.00000000	0.39022727	3.18034989	1.902460
89	0.57927728	7.83713200	4.53987251		89.00000000	0.38584270	3.02390014	1.923838
90	0.58938718	7.43355180	4.38124013		90.00000000	0.38155556	2.83631299	1.945213
91	0.59918451	6.92520670	4.14947658		91.00000000	0.37736264	2.61331426	1.966589
92	0.60930258	6.23243520	3.79743885		92.00000000	0.37326087	2.32632418	1.988131
93	0.61909175	5.38997940	3.33689178		93.00000000	0.36924731	1.99023540	2.009535
94	0.62922841	4.33257480	2.72617915		94.00000000	0.36531915	1.58277254	2.030883
95	0.63934726	3.03763320	1.94210246		95.00000000	0.36147368	1.09802446	2.052273
96	0.64910811	1.53103860	0.99380957		96.00000000	0.35770833	0.54766527	2.073768
97	0.65917110	-0.25484273	-0.16798496		97.00000000	0.35402062	-0.09021958	2.095139
98	0.66897589	-2.29487200	-1.53521404		98.00000000	0.35040816	-0.80414188	2.116538
99	0.67898828	-4.72721150	-3.20972121		99.00000000	0.34686869	-1.63972165	2.137932
100	0.68886673	-7.46471210	-5.14219181		100.00000000	0.34340000	-2.56338214	2.159426
101	0.69695824	-9.99399380	-6.96539633		101.00000000	0.34000000	-3.39795789	2.180817
15:02 02/04/2018
Test Lot:	JK-PERC
Recipe:	Recipe_YJX-LID
Cell Name:	1-10-1.5h
Test Order:	4
Test Condition:	Light
1	-0.29997638	8.91193870	-2.67337111		1.00000000	34.34000000	306.03597496	0.000000
2	-0.29015109	8.91346550	-2.58625173		2.00000000	17.17000000	153.04420264	0.061756
3	-0.28001538	8.90454580	-2.49340978		3.00000000	11.44666667	101.92736759	0.083143
4	-0.27020422	8.90959070	-2.40740901		4.00000000	8.58500000	76.48883616	0.104662
5	-0.26004025	8.90579030	-2.31586394		5.00000000	6.86800000	61.16496778	0.126071
6	-0.24989191	8.90959550	-2.22643584		6.00000000	5.72333333	50.99258491	0.147457
7	-0.24006139	8.90894990	-2.13869490		7.00000000	4.90571429	43.70476280	0.168802
8	-0.22991751	8.89494800	-2.04510430		8.00000000	4.29250000	38.18156429	0.190275
9	-0.22008476	8.91290000	-1.96159346		9.00000000	3.81555556	34.00766511	0.211661
10	-0.20993195	8.90526290	-1.86949921		10.00000000	3.43400000	30.58067280	0.233044
11	-0.20014906	8.91745090	-1.78481942		11.00000000	3.12181818	27.83866036	0.254470
12	-0.18998510	8.89143470	-1.68924011		12.00000000	2.86166667	25.44432230	0.275934
13	-0.18020891	8.90918830	-1.60551511		13.00000000	2.64153846	23.53396356	0.297323
14	-0.17008364	8.91845890	-1.51688395		14.00000000	2.45285714	21.87570562	0.318727
15	-0.16022483	8.91090390	-1.42774806		15.00000000	2.28933333	20.40002933	0.340085
16	-0.15008616	8.89560510	-1.33510721		16.00000000	2.14625000	19.09219245	0.361581
17	-0.13992220	8.91257290	-1.24706681		17.00000000	2.02000000	18.00339726	0.382968
18	-0.13012740	8.90086360	-1.15824624		18.00000000	1.90777778	16.98086978	0.404333
19	-0.11995823	8.90770440	-1.06855245		19.00000000	1.80736842	16.09950364	0.425707
20	-0.11016492	8.91254900	-0.98185025		20.00000000	1.71700000	15.30284663	0.447187
21	-0.09998830	8.90658280	-0.89055405		21.00000000	1.63523810	14.56438349	0.468552
22	-0.09013990	8.90995410	-0.80314240		22.00000000	1.56090909	13.90762835	0.489934
23	-0.08000199	8.90375610	-0.71231819		23.00000000	1.49304348	13.29369498	0.511288
24	-0.07015137	8.90760420	-0.62488060		24.00000000	1.43083333	12.74529701	0.532760
25	-0.06002462	8.90696720	-0.53463728		25.00000000	1.37360000	12.23461015	0.554154
26	-0.04987777	8.90062710	-0.44394340		26.00000000	1.32076923	11.75567441	0.575541
27	-0.04007404	8.91892810	-0.35741745		27.00000000	1.27185185	11.34355522	0.597011
28	-0.02993686	8.90244770	-0.26651136		28.00000000	1.22642857	10.91821621	0.618380
29	-0.02011155	8.91204070	-0.17923493		29.00000000	1.18413793	10.55308544	0.639740
30	-0.00995726	8.90053840	-0.08862495		30.00000000	1.14466667	10.18814962	0.661115
31	-0.00067973	8.90021800	-0.00604979		31.00000000	1.10774194	9.85914471	0.682715
32	0.00945872	8.90648460	0.08424393		32.00000000	1.07312500	9.55777129	0.704095
33	0.01927929	8.90268330	0.17163741		33.00000000	1.04060606	9.26418620	0.725454
34	0.02939980	8.91380600	0.26206410		34.00000000	1.01000000	9.00294406	0.746834
35	0.03923823	8.90124610	0.34926917		35.00000000	0.98114286	8.73339403	0.768319
36	0.04939893	8.90925690	0.44010778		36.00000000	0.95388889	8.49844117	0.789701
37	0.05919420	8.90909290	0.52736659		37.00000000	0.92810811	8.26860136	0.811063
38	0.06932289	8.90203860	0.61711506		38.00000000	0.90368421	8.04463172	0.832433
39	0.07948434	8.90848730	0.70808520		39.00000000	0.88051282	7.84403728	0.853932
40	0.08931980	8.90462210	0.79535902		40.00000000	0.85850000	7.64461807	0.875341
41	0.09945444	8.91139790	0.88627809		41.00000000	0.83756098	7.46383912	0.896706
42	0.10926385	8.89903450	0.97234277		42.00000000	0.81761905	7.27602011	0.918075
43	0.11942157	8.91051670	1.06410789		43.00000000	0.79860465	7.11598008	0.939563
44	0.12924214	8.89881800	1.15010228		44.00000000	0.78045455	6.94512296	0.960945
45	0.13938870	8.90903280	1.24181850		45.00000000	0.76311111	6.79858192	0.982286
46	0.14919215	8.90780450	1.32897451		46.00000000	0.74652174	6.64986971	1.003664
47	0.15938263	8.90297700	1.41897989		47.00000000	0.73063830	6.50485596	1.025138
48	0.16953588	8.91054530	1.51065714		48.00000000	0.71541667	6.37475262	1.046521
49	0.17936538	8.89451890	1.59536876		49.00000000	0.70081633	6.23342406	1.067879
50	0.18948664	8.90389160	1.68716850		50.00000000	0.68680000	6.11519275	1.089249
51	0.19926627	8.90190030	1.77384847		51.00000000	0.67333333	5.99394620	1.110724
52	0.20940465	8.90033820	1.86377221		52.00000000	0.66038462	5.87764642	1.132103
53	0.21926020	8.91134450	1.95390318		53.00000000	0.64792453	5.77387868	1.153504
54	0.22940527	8.89488790	2.04053416		54.00000000	0.63592593	5.65648982	1.174850
55	0.23922732	8.92127420	2.13421252		55.00000000	0.62436364	5.57011920	1.196314
56	0.24934262	8.89990430	2.21912546		56.00000000	0.61321429	5.45754846	1.217700
57	0.25951597	8.89710240	2.30894016		57.00000000	0.60245614	5.36011397	1.239079
58	0.26932389	8.90346910	2.39791693		58.00000000	0.59206897	5.27146774	1.260571
59	0.27948907	8.91281600	2.49103465		59.00000000	0.58203390	5.18756104	1.281943
60	0.28930888	8.88913540	2.57170581		60.00000000	0.57233333	5.08754849	1.303288
61	0.29947257	8.91979890	2.67123510		61.00000000	0.56295082	5.02140810	1.324680
62	0.30927229	8.90319730	2.75351222		62.00000000	0.55387097	4.93122250	1.346156
63	0.31942555	8.89811710	2.84228595		63.00000000	0.54507937	4.85018002	1.367533
64	0.32924166	8.89804170	2.92960602		64.00000000	0.53656250	4.77435550	1.388897
65	0.33939567	8.90794470	3.02331786		65.00000000	0.52830769	4.70613571	1.410270
66	0.34921250	8.88732240	3.10356407		66.00000000	0.52030303	4.62410078	1.431755
67	0.35936800	8.91093920	3.20230640		67.00000000	0.51253731	4.56718884	1.453182
68	0.36953241	8.89756300	3.28793790		68.00000000	0.50500000	4.49326932	1.474539
69	0.37934035	8.90484430	3.37796675		69.00000000	0.49768116	4.43177324	1.495925
70	0.38946754	8.90433880	3.46795093		70.00000000	0.49057143	4.36821421	1.517418
71	0.39928290	8.90557000	3.55584182		71.00000000	0.48366197	4.30728555	1.538806
72	0.40943840	8.90243430	3.64499846		72.00000000	0.47694444	4.24596658	1.560206
73	0.41928205	8.89379600	3.72900902		73.00000000	0.47041096	4.18373910	1.581597
74	0.42943826	8.89471910	3.81973269		74.00000000	0.46405405	4.12763046	1.603077
75	0.43924394	8.89285470	3.90613254		75.00000000	0.45786667	4.07174174	1.624459
76	0.44940168	8.88601110	3.99338832		76.00000000	0.45184211	4.01507396	1.645819
77	0.45953485	8.88557050	4.08322931		77.00000000	0.44597403	3.96273365	1.667197
78	0.46939933	8.87925050	4.16791424		78.00000000	0.44025641	3.90914695	1.688678
79	0.47952133	8.87997820	4.25813896		79.00000000	0.43468354	3.85998040	1.710052
80	0.48936421	8.85671040	4.33415709		80.00000000	0.42925000	3.80174294	1.731402
81	0.49947506	8.84013180	4.41542536		81.00000000	0.42395062	3.74777933	1.752779
82	0.50932986	8.81452180	4.48949915		82.00000000	0.41878049	3.69134974	1.774252
83	0.51945931	8.77004430	4.55568116		83.00000000	0.41373494	3.62847375	1.795636
84	0.52921885	8.72294240	4.61634555		84.00000000	0.40880952	3.56602193	1.817031
85	0.53935945	8.63619230	4.65801193		85.00000000	0.40400000	3.48902169	1.838384
86	0.54950970	8.53846840	4.69197121		86.00000000	0.39930233	3.40943029	1.859857
87	0.55932283	8.37550350	4.68461032		87.00000000	0.39471264	3.30591713	1.881232
88	0.56945455	8.17494010	4.65525684		88.00000000	0.39022727	3.19008458	1.902611
89	0.57923865	7.86709020	4.55692271		89.00000000	0.38584270	3.03545930	1.924101
90	0.58938968	7.47577480	4.40614452		90.00000000	0.38155556	2.85242341	1.945476
91	0.59917450	6.94691040	4.16241157		91.00000000	0.37736264	2.62150443	1.966819
92	0.60929722	6.28914020	3.83195564		92.00000000	0.37326087	2.34748994	1.988289
93	0.61908656	5.42253780	3.35702027		93.00000000	0.36924731	2.00225751	2.009790
94	0.62921453	4.37454700	2.75252853		94.00000000	0.36531915	1.59810579	2.031166
95	0.63932461	3.07676120	1.96704915		95.00000000	0.36147368	1.11216821	2.052582
96	0.64907146	1.56669560	1.01689740		96.00000000	0.35770833	0.56042007	2.073977
97	0.65915626	-0.26892063	-0.17726072		97.00000000	0.35402062	-0.09520345	2.095470
98	0.66896343	-2.34415340	-1.56815290		98.00000000	0.35040816	-0.82141049	2.116860
99	0.67899615	-4.81847810	-3.27172808		99.00000000	0.34686869	-1.67137917	2.138216
100	0.68886358	-7.62518310	-5.25271093		100.00000000	0.34340000	-2.61848788	2.159597
101	0.69629508	-9.99524020	-6.95963657		101.00000000	0.34000000	-3.39838167	2.181099
