# Supplementary material for: Study on the Electrical Injection Regeneration of Industrialized B-Doped Czochralski Silicon PERC Solar Cells
Source: Hindawi journal article supplement (doi:10.1155/2019/5357370), 2019-06-20
Supplement: f1 [file 5357370.f1.zip › section3.2/IVRawData_1-10-2.5h.csv]

16:42 02/04/2018
Test Lot:	JK-PERC
Recipe:	Recipe_YJX-LID
Cell Name:	1-10-2.5h
Test Order:	2
Test Condition:	Light
1	-0.29994336	8.91706370	-2.67461405		1.00000000	34.34000000	306.21196746	0.000000
2	-0.29008010	8.91549490	-2.58620765		2.00000000	17.17000000	153.07904743	0.061786
3	-0.27997717	8.90810200	-2.49406519		3.00000000	11.44666667	101.96807423	0.083214
4	-0.27011985	8.91342930	-2.40769419		4.00000000	8.58500000	76.52179054	0.104700
5	-0.25999534	8.90519810	-2.31531001		5.00000000	6.86800000	61.16090055	0.126084
6	-0.24982394	8.91002460	-2.22593745		6.00000000	5.72333333	50.99504079	0.147435
7	-0.24000460	8.89774990	-2.13550091		7.00000000	4.90571429	43.64981880	0.168812
8	-0.22984511	8.91039470	-2.04801065		8.00000000	4.29250000	38.24786925	0.190305
9	-0.21998779	8.90433500	-1.95884498		9.00000000	3.81555556	33.97498488	0.211678
10	-0.20986404	8.91614910	-1.87117907		10.00000000	3.43400000	30.61805601	0.233222
11	-0.20003648	8.90228270	-1.78078130		11.00000000	3.12181818	27.79130799	0.254628
12	-0.18989040	8.91060160	-1.69203770		12.00000000	2.86166667	25.49917158	0.276159
13	-0.18008444	8.90555190	-1.60375133		13.00000000	2.64153846	23.52435787	0.297548
14	-0.16995919	8.90728090	-1.51387425		14.00000000	2.45285714	21.84828758	0.318933
15	-0.16012718	8.91191390	-1.42703964		15.00000000	2.28933333	20.40234156	0.340277
16	-0.14998332	8.91133980	-1.33655233		16.00000000	2.14625000	19.12596305	0.361751
17	-0.13985136	8.91743950	-1.24711604		17.00000000	2.02000000	18.01322779	0.383133
18	-0.13001490	8.90058230	-1.15720832		18.00000000	1.90777778	16.98033312	0.404520
19	-0.11987847	8.91119770	-1.06826075		19.00000000	1.80736842	16.10581732	0.425995
20	-0.11003754	8.90746780	-0.98015584		20.00000000	1.71700000	15.29412221	0.447431
21	-0.09987656	8.89626120	-0.88852797		21.00000000	1.63523810	14.54750522	0.468820
22	-0.09007581	8.92469020	-0.80389873		22.00000000	1.56090909	13.93063007	0.490210
23	-0.07995205	8.90152360	-0.71169502		23.00000000	1.49304348	13.29036176	0.511547
24	-0.07011260	8.90552520	-0.62438954		24.00000000	1.43083333	12.74232231	0.533030
25	-0.05996725	8.90837760	-0.53421091		25.00000000	1.37360000	12.23654747	0.554406
26	-0.04986209	8.90378950	-0.44396155		26.00000000	1.32076923	11.75985121	0.575792
27	-0.03999138	8.90258120	-0.35602653		27.00000000	1.27185185	11.32276439	0.597159
28	-0.02989590	8.90091230	-0.26610077		28.00000000	1.22642857	10.91633316	0.618638
29	-0.02004529	8.91150470	-0.17863366		29.00000000	1.18413793	10.55245074	0.640032
30	-0.00991333	8.89966580	-0.08822535		30.00000000	1.14466667	10.18715079	0.661420
31	-0.00066187	8.90506940	-0.00589399		31.00000000	1.10774194	9.86451881	0.682892
32	0.00950188	8.90546320	0.08461864		32.00000000	1.07312500	9.55667520	0.704375
33	0.01933063	8.90967370	0.17222959		33.00000000	1.04060606	9.27146045	0.725758
34	0.02946825	8.90619090	0.26244982		34.00000000	1.01000000	8.99525281	0.747153
35	0.03925978	8.91184040	0.34987689		35.00000000	0.98114286	8.74378855	0.768650
36	0.04941750	8.89249990	0.43944508		36.00000000	0.95388889	8.48245685	0.790034
37	0.05923434	8.91271500	0.52793875		37.00000000	0.92810811	8.27196306	0.811372
38	0.06936526	8.90307710	0.61756422		38.00000000	0.90368421	8.04557020	0.832755
39	0.07954604	8.91043190	0.70878959		39.00000000	0.88051282	7.84574952	0.854238
40	0.08937777	8.90235610	0.79567272		40.00000000	0.85850000	7.64267271	0.875612
41	0.09952729	8.90780640	0.88656985		41.00000000	0.83756098	7.46083102	0.896976
42	0.10936794	8.89145660	0.97244029		42.00000000	0.81761905	7.26982428	0.918347
43	0.11949440	8.91122440	1.06484141		43.00000000	0.79860465	7.11654525	0.939825
44	0.12931496	8.90310190	1.15130427		44.00000000	0.78045455	6.94846635	0.961216
45	0.13948831	8.90706540	1.24243150		45.00000000	0.76311111	6.79708057	0.982572
46	0.14930217	8.90567680	1.32963687		46.00000000	0.74652174	6.64828133	1.003952
47	0.15940554	8.91069030	1.42041340		47.00000000	0.73063830	6.51049159	1.025438
48	0.16960122	8.89194580	1.50808486		48.00000000	0.71541667	6.36144622	1.046816
49	0.17942327	8.91495610	1.59955058		49.00000000	0.70081633	6.24774679	1.068185
50	0.18955196	8.89877320	1.68677990		50.00000000	0.68680000	6.11167743	1.089614
51	0.19934945	8.90063860	1.77433741		51.00000000	0.67333333	5.99309666	1.111106
52	0.20947069	8.90125660	1.86455236		52.00000000	0.66038462	5.87825292	1.132500
53	0.21932103	8.90542980	1.95314804		53.00000000	0.64792453	5.77004640	1.153850
54	0.22945939	8.90133670	2.04249529		54.00000000	0.63592593	5.66059078	1.175229
55	0.23928367	8.90408800	2.13060285		55.00000000	0.62436364	5.55938876	1.196702
56	0.24941830	8.90696050	2.22155895		56.00000000	0.61321429	5.46187542	1.218073
57	0.25956336	8.89940550	2.30995959		57.00000000	0.60245614	5.36150149	1.239434
58	0.26939213	8.91868110	2.40262250		58.00000000	0.59206897	5.28047429	1.260810
59	0.27953419	8.90444370	2.48909646		59.00000000	0.58203390	5.18268808	1.282292
60	0.28935701	8.90576740	2.57694623		60.00000000	0.57233333	5.09706754	1.303665
61	0.29946336	8.91285510	2.66907354		61.00000000	0.56295082	5.01749908	1.325056
62	0.30930698	8.88925360	2.74950819		62.00000000	0.55387097	4.92349949	1.346403
63	0.31947139	8.91477390	2.84801521		63.00000000	0.54507937	4.85925930	1.367873
64	0.32927558	8.90732290	2.93296391		64.00000000	0.53656250	4.77933544	1.389258
65	0.33941916	8.90592380	3.02284118		65.00000000	0.52830769	4.70506805	1.410641
66	0.34925461	8.89647480	3.10713484		66.00000000	0.52030303	4.62886280	1.432135
67	0.35940489	8.90344720	3.19994246		67.00000000	0.51253731	4.56334891	1.453510
68	0.36955291	8.90509130	3.29090240		68.00000000	0.50500000	4.49707111	1.474852
69	0.37938166	8.89839270	3.37588699		69.00000000	0.49768116	4.42856240	1.496243
70	0.38950440	8.90135000	3.46711499		70.00000000	0.49057143	4.36674799	1.517718
71	0.39935920	8.90417860	3.55596564		71.00000000	0.48366197	4.30661258	1.539094
72	0.40949905	8.89607430	3.64293397		72.00000000	0.47694444	4.24293321	1.560452
73	0.41932482	8.89967060	3.73185277		73.00000000	0.47041096	4.18650258	1.581829
74	0.42947137	8.89168360	3.81872354		74.00000000	0.46405405	4.12622182	1.603316
75	0.43928820	8.88919350	3.90491781		75.00000000	0.45786667	4.07006540	1.624697
76	0.44947347	8.88771340	3.99479138		76.00000000	0.45184211	4.01584313	1.646050
77	0.45958281	8.88682750	4.08423315		77.00000000	0.44597403	3.96329424	1.667430
78	0.46946067	8.87539860	4.16665057		78.00000000	0.44025641	3.90745113	1.688920
79	0.47959977	8.86521050	4.25175292		79.00000000	0.43468354	3.85356112	1.710287
80	0.48940322	8.85602950	4.33416935		80.00000000	0.42925000	3.80145066	1.731637
81	0.49951479	8.83441640	4.41292165		81.00000000	0.42395062	3.74535629	1.753024
82	0.50935769	8.81763080	4.49132806		82.00000000	0.41878049	3.69265173	1.774511
83	0.51950568	8.76939680	4.55575145		83.00000000	0.41373494	3.62820586	1.795900
84	0.52925628	8.73055270	4.62069984		84.00000000	0.40880952	3.56913309	1.817251
85	0.53941846	8.64100070	4.66111529		85.00000000	0.40400000	3.49096428	1.838618
86	0.54955018	8.56229500	4.70541076		86.00000000	0.39930233	3.41894431	1.860095
87	0.55937070	8.36996650	4.68191402		87.00000000	0.39471264	3.30373160	1.881475
88	0.56948227	8.19683930	4.66795465		88.00000000	0.39022727	3.19863025	1.902834
89	0.57929540	7.90614650	4.57999430		89.00000000	0.38584270	3.05052889	1.924210
90	0.58942634	7.50278710	4.42234034		90.00000000	0.38155556	2.86273010	1.945687
91	0.59919477	7.00818630	4.19926858		91.00000000	0.37736264	2.64462767	1.967071
92	0.60932344	6.33284900	3.85875334		92.00000000	0.37326087	2.36380472	1.988573
93	0.61910754	5.51554630	3.41471630		93.00000000	0.36924731	2.03660064	2.009944
94	0.62921840	4.46668530	2.81052058		94.00000000	0.36531915	1.63176567	2.031441
95	0.63933742	3.16007970	2.02035720		95.00000000	0.36147368	1.14228565	2.052812
96	0.64914382	1.68402110	1.09317189		96.00000000	0.35770833	0.60238838	2.074197
97	0.65919513	-0.14992861	-0.09883221		97.00000000	0.35402062	-0.05307782	2.095680
98	0.66894644	-2.21982620	-1.48494483		98.00000000	0.35040816	-0.77784522	2.117055
99	0.67901558	-4.68956140	-3.18428525		99.00000000	0.34686869	-1.62666200	2.138415
100	0.68892771	-7.49255800	-5.16183082		100.00000000	0.34340000	-2.57294442	2.159800
101	0.69671714	-9.99455260	-6.96337610		101.00000000	0.34000000	-3.39814788	2.181275
16:43 02/04/2018
Test Lot:	JK-PERC
Recipe:	Recipe_YJX-LID
Cell Name:	1-10-2.5h
Test Order:	3
Test Condition:	Light
1	-0.29992688	8.91728880	-2.67453461		1.00000000	34.34000000	306.21969739	0.000000
2	-0.29009414	8.90710350	-2.58389853		2.00000000	17.17000000	152.93496710	0.061724
3	-0.27990565	8.90770240	-2.49331623		3.00000000	11.44666667	101.96350014	0.083247
4	-0.27010718	8.90042110	-2.40406764		4.00000000	8.58500000	76.41011514	0.104667
5	-0.25994846	8.90230750	-2.31414113		5.00000000	6.86800000	61.14104791	0.126025
6	-0.24978751	8.90845390	-2.22522052		6.00000000	5.72333333	50.98605115	0.147458
7	-0.23997264	8.91154100	-2.13852602		7.00000000	4.90571429	43.71747399	0.168971
8	-0.22983178	8.90435700	-2.04650422		8.00000000	4.29250000	38.22195242	0.190361
9	-0.21998270	8.91239070	-1.96057177		9.00000000	3.81555556	34.00572185	0.211705
10	-0.20984854	8.90293500	-1.86826791		10.00000000	3.43400000	30.57267879	0.233093
11	-0.20004186	8.91513060	-1.78339931		11.00000000	3.12181818	27.83141680	0.254576
12	-0.18988687	8.90914440	-1.69172954		12.00000000	2.86166667	25.49500156	0.275960
13	-0.18008690	8.89242080	-1.60140850		13.00000000	2.64153846	23.48967156	0.297316
14	-0.16996688	8.89360710	-1.51161865		14.00000000	2.45285714	21.81474770	0.318689
15	-0.16013862	8.91322800	-1.42735203		15.00000000	2.28933333	20.40534997	0.340162
16	-0.14999703	8.89860440	-1.33476423		16.00000000	2.14625000	19.09862969	0.361540
17	-0.13984649	8.89276310	-1.24362171		17.00000000	2.02000000	17.96338146	0.382890
18	-0.13001302	8.90543170	-1.15782207		18.00000000	1.90777778	16.98958470	0.404275
19	-0.11986399	8.91096880	-1.06810428		19.00000000	1.80736842	16.10540361	0.425765
20	-0.11006997	8.90471080	-0.98014125		20.00000000	1.71700000	15.28938844	0.447142
21	-0.09989711	8.90345380	-0.88942929		21.00000000	1.63523810	14.55926683	0.468507
22	-0.09009638	8.89486890	-0.80139552		22.00000000	1.56090909	13.88408173	0.489881
23	-0.07994214	8.91556840	-0.71272959		23.00000000	1.49304348	13.31133125	0.511364
24	-0.07012133	8.88928320	-0.62332833		24.00000000	1.43083333	12.71908271	0.532764
25	-0.05996930	8.91409300	-0.53457194		25.00000000	1.37360000	12.24439814	0.554117
26	-0.04986566	8.89851570	-0.44373039		26.00000000	1.32076923	11.75288574	0.575485
27	-0.04000540	8.90659140	-0.35631176		27.00000000	1.27185185	11.32786477	0.596977
28	-0.02987422	8.91152480	-0.26622487		28.00000000	1.22642857	10.92934863	0.618358
29	-0.02005564	8.90180970	-0.17853151		29.00000000	1.18413793	10.54097052	0.639776
30	-0.00990213	8.90201660	-0.08814896		30.00000000	1.14466667	10.18984167	0.661142
31	-0.00063804	8.90968890	-0.00568477		31.00000000	1.10774194	9.86963603	0.682745
32	0.00947358	8.90591720	0.08437089		32.00000000	1.07312500	9.55716240	0.704130
33	0.01934249	8.90453530	0.17223587		33.00000000	1.04060606	9.26611340	0.725509
34	0.02946445	8.90820030	0.26247519		34.00000000	1.01000000	8.99728230	0.746873
35	0.03927754	8.89973550	0.34955971		35.00000000	0.98114286	8.73191192	0.768354
36	0.04944341	8.90257930	0.44017387		36.00000000	0.95388889	8.49207148	0.789725
37	0.05928478	8.90719890	0.52806133		37.00000000	0.92810811	8.26684352	0.811116
38	0.06941939	8.89865590	0.61773927		38.00000000	0.90368421	8.04157483	0.832607
39	0.07956145	8.90727040	0.70867535		39.00000000	0.88051282	7.84296578	0.853987
40	0.08938719	8.89348220	0.79496341		40.00000000	0.85850000	7.63505447	0.875334
41	0.09954711	8.90800000	0.88676566		41.00000000	0.83756098	7.46099317	0.896719
42	0.10934234	8.89755920	0.97287994		42.00000000	0.81761905	7.27481388	0.918194
43	0.11949630	8.91217230	1.06497161		43.00000000	0.79860465	7.11730225	0.939584
44	0.12933396	8.89211370	1.15005228		44.00000000	0.78045455	6.93989056	0.960941
45	0.13948345	8.90809630	1.24253200		45.00000000	0.76311111	6.79786727	0.982320
46	0.14931366	8.90155600	1.32912391		46.00000000	0.74652174	6.64520507	1.003803
47	0.15943263	8.90621570	1.41994139		47.00000000	0.73063830	6.50722228	1.025179
48	0.16958287	8.89812180	1.50896903		48.00000000	0.71541667	6.36586464	1.046536
49	0.17943840	8.89109230	1.59540338		49.00000000	0.70081633	6.23102264	1.067917
50	0.18956557	8.91479400	1.68993801		50.00000000	0.68680000	6.12268052	1.089397
51	0.19934516	8.89946170	1.77406462		51.00000000	0.67333333	5.99230421	1.110769
52	0.20948052	8.90312480	1.86503121		52.00000000	0.66038462	5.87948665	1.132129
53	0.21928692	8.90712360	1.95321570		53.00000000	0.64792453	5.77114386	1.153511
54	0.22945948	8.90700150	2.04379593		54.00000000	0.63592593	5.66419318	1.175039
55	0.23924132	8.90017410	2.12928940		55.00000000	0.62436364	5.55694507	1.196427
56	0.24939379	8.90634250	2.22118651		56.00000000	0.61321429	5.46149645	1.217778
57	0.25954551	8.90433500	2.31108017		57.00000000	0.60245614	5.36447130	1.239156
58	0.26937276	8.89440350	2.39591002		58.00000000	0.59206897	5.26610028	1.260639
59	0.27952299	8.90716840	2.48975834		59.00000000	0.58203390	5.18427395	1.282022
60	0.28933609	8.90320010	2.57601711		60.00000000	0.57233333	5.09559819	1.303438
61	0.29944837	8.90341190	2.66611218		61.00000000	0.56295082	5.01218303	1.324803
62	0.30928972	8.90655140	2.75470479		62.00000000	0.55387097	4.93308024	1.346276
63	0.31945413	8.89450840	2.84138744		63.00000000	0.54507937	4.84821299	1.367667
64	0.32927540	8.91060160	2.93404191		64.00000000	0.53656250	4.78109467	1.389064
65	0.33942565	8.88015460	3.01415225		65.00000000	0.52830769	4.69145398	1.410409
66	0.34924394	8.91336540	3.11293885		66.00000000	0.52030303	4.63765103	1.431889
67	0.35937259	8.89819720	3.19776817		67.00000000	0.51253731	4.56065809	1.453259
68	0.36956674	8.89331530	3.28667354		68.00000000	0.50500000	4.49112423	1.474643
69	0.37937388	8.89775660	3.37557644		69.00000000	0.49768116	4.42824582	1.496147
70	0.38952711	8.89620590	3.46531337		70.00000000	0.49057143	4.36422444	1.517513
71	0.39931712	8.90917110	3.55758455		71.00000000	0.48366197	4.30902726	1.538901
72	0.40947482	8.89935490	3.64406175		72.00000000	0.47694444	4.24449788	1.560270
73	0.41930726	8.89910130	3.73145778		73.00000000	0.47041096	4.18623478	1.581748
74	0.42945972	8.89571000	3.82034913		74.00000000	0.46405405	4.12809029	1.603141
75	0.43929812	8.88948060	3.90513212		75.00000000	0.45786667	4.07019685	1.624489
76	0.44944763	8.89619060	3.99837178		76.00000000	0.45184211	4.01967349	1.645867
77	0.45958966	8.88068390	4.08147049		77.00000000	0.44597403	3.96055435	1.667348
78	0.46944964	8.86944200	4.16375635		78.00000000	0.44025641	3.90482870	1.688726
79	0.47959021	8.87682720	4.25723942		79.00000000	0.43468354	3.85861071	1.710072
80	0.48939660	8.84657000	4.32948128		80.00000000	0.42925000	3.79739017	1.731450
81	0.49952826	8.84093280	4.41629578		81.00000000	0.42395062	3.74811892	1.752928
82	0.50935173	8.81038380	4.48758423		82.00000000	0.41878049	3.68961683	1.774295
83	0.51947594	8.77103520	4.55634176		83.00000000	0.41373494	3.62888372	1.795664
84	0.52927715	8.73689370	4.62423820		84.00000000	0.40880952	3.57172535	1.817043
85	0.53936487	8.64726350	4.66403015		85.00000000	0.40400000	3.49349445	1.838520
86	0.54952776	8.53307250	4.68916022		86.00000000	0.39930233	3.40727569	1.859902
87	0.55933785	8.38573270	4.69045770		87.00000000	0.39471264	3.30995472	1.881257
88	0.56947470	8.17312340	4.65438700		88.00000000	0.39022727	3.18937565	1.902640
89	0.57927513	7.90405560	4.57862284		89.00000000	0.38584270	3.04972213	1.924138
90	0.58939487	7.50984530	4.42626429		90.00000000	0.38155556	2.86542320	1.945508
91	0.59919679	7.00940420	4.20001250		91.00000000	0.37736264	2.64508726	1.966883
92	0.60930014	6.33608060	3.86057480		92.00000000	0.37326087	2.36501095	1.988351
93	0.61910880	5.52845340	3.42271415		93.00000000	0.36924731	2.04136656	2.009856
94	0.62920767	4.46905760	2.81196532		94.00000000	0.36531915	1.63263232	2.031247
95	0.63931996	3.17557840	2.03021066		95.00000000	0.36147368	1.14788802	2.052636
96	0.64912188	1.68164470	1.09159237		96.00000000	0.35770833	0.60153832	2.073991
97	0.65917236	-0.15102530	-0.09955170		97.00000000	0.35402062	-0.05346607	2.095472
98	0.66894752	-2.21789150	-1.48365302		98.00000000	0.35040816	-0.77716729	2.116850
99	0.67900473	-4.71664710	-3.20262569		99.00000000	0.34686869	-1.63605719	2.138276
100	0.68890864	-7.55285360	-5.20322610		100.00000000	0.34340000	-2.59364993	2.159783
101	0.69645542	-9.99472240	-6.96087859		101.00000000	0.34000000	-3.39820562	2.181183
16:43 02/04/2018
Test Lot:	JK-PERC
Recipe:	Recipe_YJX-LID
Cell Name:	1-10-2.5h
Test Order:	4
Test Condition:	Light
1	-0.29987565	8.90083600	-2.66914398		1.00000000	34.34000000	305.65470824	0.000000
2	-0.29005781	8.91665840	-2.58634641		2.00000000	17.17000000	153.09902473	0.061738
3	-0.27994302	8.89204980	-2.48926728		3.00000000	11.44666667	101.78433004	0.083264
4	-0.27013186	8.90667720	-2.40597728		4.00000000	8.58500000	76.46382376	0.104636
5	-0.25997239	8.90522380	-2.31511231		5.00000000	6.86800000	61.16107706	0.125971
6	-0.24979879	8.90863320	-2.22536579		6.00000000	5.72333333	50.98707735	0.147403
7	-0.23999211	8.90243340	-2.13651378		7.00000000	4.90571429	43.67279471	0.168894
8	-0.22983785	8.89815430	-2.04513265		8.00000000	4.29250000	38.19532733	0.190275
9	-0.22000363	8.90262700	-1.95861026		9.00000000	3.81555556	33.96846791	0.211641
10	-0.20986353	8.90162370	-1.86812617		10.00000000	3.43400000	30.56817579	0.233009
11	-0.20005387	8.91496470	-1.78347319		11.00000000	3.12181818	27.83089889	0.254492
12	-0.18988398	8.89222620	-1.68849130		12.00000000	2.86166667	25.44658731	0.275872
13	-0.18010633	8.91360950	-1.60539749		13.00000000	2.64153846	23.54564233	0.297234
14	-0.16992974	8.90616510	-1.51342232		14.00000000	2.45285714	21.84555068	0.318609
15	-0.16012456	8.90731140	-1.42627932		15.00000000	2.28933333	20.39180490	0.340086
16	-0.14996435	8.90674590	-1.33569436		16.00000000	2.14625000	19.11610339	0.361455
17	-0.13978702	8.89964100	-1.24405429		17.00000000	2.02000000	17.97727482	0.382810
18	-0.13000341	8.90224650	-1.15732240		18.00000000	1.90777778	16.98350805	0.404188
19	-0.11987819	8.91174890	-1.06832433		19.00000000	1.80736842	16.10681354	0.425671
20	-0.11004323	8.89855480	-0.97922571		20.00000000	1.71700000	15.27881859	0.447061
21	-0.09987855	8.90902330	-0.88982033		21.00000000	1.63523810	14.56837429	0.468442
22	-0.09006964	8.90867610	-0.80240122		22.00000000	1.56090909	13.90563351	0.489807
23	-0.07991389	8.89068790	-0.71048947		23.00000000	1.49304348	13.27418359	0.511294
24	-0.07012210	8.89808270	-0.62395224		24.00000000	1.43083333	12.73167333	0.532675
25	-0.05992691	8.90328790	-0.53354651		25.00000000	1.37360000	12.22955626	0.554064
26	-0.04977712	8.89758010	-0.44289589		26.00000000	1.32076923	11.75165002	0.575413
27	-0.03997714	8.91427420	-0.35636720		27.00000000	1.27185185	11.33763615	0.596890
28	-0.02984819	8.90692230	-0.26585549		28.00000000	1.22642857	10.92370399	0.618283
29	-0.01999239	8.90303230	-0.17799289		29.00000000	1.18413793	10.54241825	0.639679
30	-0.00985972	8.90023520	-0.08775379		30.00000000	1.14466667	10.18780256	0.661152
31	-0.00062167	8.90021900	-0.00553301		31.00000000	1.10774194	9.85914582	0.682722
32	0.00952270	8.91535190	0.08489824		32.00000000	1.07312500	9.56728701	0.704105
33	0.01934101	8.89522550	0.17204262		33.00000000	1.04060606	9.25642557	0.725476
34	0.02947562	8.89141850	0.26208011		34.00000000	1.01000000	8.98033269	0.746821
35	0.03930137	8.90323730	0.34990945		35.00000000	0.98114286	8.73534768	0.768321
36	0.04940398	8.89371490	0.43938495		36.00000000	0.95388889	8.48361582	0.789705
37	0.05926248	8.91175370	0.52813263		37.00000000	0.92810811	8.27107087	0.811133
38	0.06941719	8.89904210	0.61774653		38.00000000	0.90368421	8.04192383	0.832490
39	0.07956521	8.90211580	0.70829867		39.00000000	0.88051282	7.83842709	0.853965
40	0.08933811	8.90165710	0.79525721		40.00000000	0.85850000	7.64207262	0.875359
41	0.09951887	8.89981460	0.88569952		41.00000000	0.83756098	7.45413740	0.896744
42	0.10934909	8.90367510	0.97360877		42.00000000	0.81761905	7.27981436	0.918114
43	0.11950454	8.90001680	1.06359241		43.00000000	0.79860465	7.10759481	0.939597
44	0.12933327	8.89828590	1.15084441		44.00000000	0.78045455	6.94470768	0.960976
45	0.13948202	8.90317060	1.24183222		45.00000000	0.76311111	6.79410841	0.982368
46	0.14929885	8.89653870	1.32824300		46.00000000	0.74652174	6.64145954	1.003844
47	0.15944536	8.90848640	1.42041682		47.00000000	0.73063830	6.50888134	1.025224
48	0.16961125	8.88542080	1.50706733		48.00000000	0.71541667	6.35677813	1.046603
49	0.17943849	8.91013530	1.59882122		49.00000000	0.70081633	6.24436829	1.067971
50	0.18955003	8.89660550	1.68635184		50.00000000	0.68680000	6.11018866	1.089444
51	0.19931325	8.89997200	1.77388234		51.00000000	0.67333333	5.99264781	1.110835
52	0.20948508	8.89657020	1.86369872		52.00000000	0.66038462	5.87515809	1.132189
53	0.21932200	8.89567280	1.95101675		53.00000000	0.64792453	5.76372460	1.153563
54	0.22945884	8.90461440	2.04324249		54.00000000	0.63592593	5.66267516	1.175058
55	0.23928459	8.89756870	2.12905108		55.00000000	0.62436364	5.55531835	1.196438
56	0.24945344	8.89816090	2.21967685		56.00000000	0.61321429	5.45647938	1.217795
57	0.25957468	8.90303040	2.31100127		57.00000000	0.60245614	5.36368533	1.239232
58	0.26937065	8.89666080	2.39649930		58.00000000	0.59206897	5.26743676	1.260708
59	0.27957523	8.89619640	2.48715615		59.00000000	0.58203390	5.17788787	1.282103
60	0.28935632	8.88905910	2.57210543		60.00000000	0.57233333	5.08750482	1.303448
61	0.29952666	8.90915390	2.66852911		61.00000000	0.56295082	5.01541549	1.324821
62	0.30935240	8.89311600	2.75110678		62.00000000	0.55387097	4.92563877	1.346297
63	0.31947139	8.90362170	2.84445240		63.00000000	0.54507937	4.85318046	1.367661
64	0.32928523	8.88699630	2.92635662		64.00000000	0.53656250	4.76842895	1.389007
65	0.33943102	8.89974980	3.02085115		65.00000000	0.52830769	4.70180628	1.410392
66	0.34926197	8.89574910	3.10694686		66.00000000	0.52030303	4.62848521	1.431882
67	0.35940850	8.90992640	3.20230328		67.00000000	0.51253731	4.56666974	1.453271
68	0.36956841	8.89624310	3.28777042		68.00000000	0.50500000	4.49260277	1.474642
69	0.37939864	8.91335110	3.38171329		69.00000000	0.49768116	4.43600691	1.496017
70	0.38954887	8.89697270	3.46580566		70.00000000	0.49057143	4.36460061	1.517493
71	0.39936122	8.89280700	3.55144225		71.00000000	0.48366197	4.30111257	1.538879
72	0.40949139	8.89149380	3.64099016		72.00000000	0.47694444	4.24074857	1.560266
73	0.41930744	8.89703940	3.73059481		73.00000000	0.47041096	4.18526484	1.581631
74	0.42946887	8.88985820	3.81791736		74.00000000	0.46405405	4.12537474	1.603113
75	0.43928939	8.88804720	3.90442483		75.00000000	0.45786667	4.06954054	1.624481
76	0.44941732	8.88394070	3.99259682		76.00000000	0.45184211	4.01413847	1.645875
77	0.45957574	8.87487030	4.07867509		77.00000000	0.44597403	3.95796164	1.667360
78	0.46943721	8.87456610	4.16605155		78.00000000	0.44025641	3.90708461	1.688733
79	0.47961053	8.86040780	4.24954488		79.00000000	0.43468354	3.85147347	1.710096
80	0.48941618	8.85422130	4.33339917		80.00000000	0.42925000	3.80067449	1.731478
81	0.49952552	8.83351230	4.41256483		81.00000000	0.42395062	3.74497299	1.752951
82	0.50938922	8.81489090	4.49021040		82.00000000	0.41878049	3.69150431	1.774337
83	0.51950896	8.77127930	4.55675819		83.00000000	0.41373494	3.62898471	1.795693
84	0.52927810	8.72807600	4.61957948		84.00000000	0.40880952	3.56812059	1.817073
85	0.53940904	8.65032290	4.66606237		85.00000000	0.40400000	3.49473045	1.838554
86	0.54957563	8.53475000	4.69049061		86.00000000	0.39930233	3.40794552	1.859923
87	0.55937755	8.40322110	4.70057323		87.00000000	0.39471264	3.31685762	1.881284
88	0.56949210	8.17444800	4.65528356		88.00000000	0.39022727	3.18989255	1.902666
89	0.57931787	7.91948890	4.58790144		89.00000000	0.38584270	3.05567695	1.924142
90	0.58942491	7.51640700	4.43035752		90.00000000	0.38155556	2.86792685	1.945517
91	0.59922016	7.02790980	4.21126523		91.00000000	0.37736264	2.65207058	1.966863
92	0.60933322	6.35553550	3.87263891		92.00000000	0.37326087	2.37227271	1.988341
93	0.61913067	5.54487850	3.43300434		93.00000000	0.36924731	2.04743148	2.009853
94	0.62925410	4.48805480	2.82412688		94.00000000	0.36531915	1.63957236	2.031232
95	0.63934851	3.19250560	2.04112370		95.00000000	0.36147368	1.15400676	2.052588
96	0.64913559	1.68082540	1.09108359		96.00000000	0.35770833	0.60124525	2.073970
97	0.65922630	-0.15663940	-0.10326081		97.00000000	0.35402062	-0.05545358	2.095450
98	0.66899401	-2.25598880	-1.50924299		98.00000000	0.35040816	-0.79051689	2.116834
99	0.67899913	-4.78423640	-3.24849235		99.00000000	0.34686869	-1.65950180	2.138245
100	0.68891567	-7.64972500	-5.27001542		100.00000000	0.34340000	-2.62691557	2.159620
101	0.69602484	-9.99567600	-6.95723879		101.00000000	0.34000000	-3.39852984	2.181107
