# Supplementary material for: Study on the Electrical Injection Regeneration of Industrialized B-Doped Czochralski Silicon PERC Solar Cells
Source: Hindawi journal article supplement (doi:10.1155/2019/5357370), 2019-06-20
Supplement: f1 [file 5357370.f1.zip › section3.2/IVRawData_1-10-2h.csv]

15:59 02/04/2018
Test Lot:	JK-PERC
Recipe:	Recipe_YJX-LID
Cell Name:	1-10-2h
Test Order:	2
Test Condition:	Light
1	-0.29989770	8.89574810	-2.66781439		1.00000000	34.34000000	305.47998975	0.000000
2	-0.29011035	8.90232560	-2.58265680		2.00000000	17.17000000	152.85293055	0.061731
3	-0.27999553	8.88836380	-2.48870213		3.00000000	11.44666667	101.74213763	0.083281
4	-0.27014193	8.90855220	-2.40657348		4.00000000	8.58500000	76.47992064	0.104689
5	-0.25999138	8.90353390	-2.31484207		5.00000000	6.86800000	61.14947083	0.126060
6	-0.24985275	8.89641280	-2.22279320		6.00000000	5.72333333	50.91713593	0.147436
7	-0.24004011	8.90442180	-2.13741839		7.00000000	4.90571429	43.68254923	0.168918
8	-0.22986946	8.89043620	-2.04363977		8.00000000	4.29250000	38.16219739	0.190312
9	-0.22008361	8.90368080	-1.95955421		9.00000000	3.81555556	33.97248874	0.211662
10	-0.20990478	8.89677810	-1.86747625		10.00000000	3.43400000	30.55153600	0.233036
11	-0.20007353	8.91028590	-1.78271235		11.00000000	3.12181818	27.81629253	0.254529
12	-0.18991627	8.89132400	-1.68860709		12.00000000	2.86166667	25.44400551	0.275912
13	-0.18014680	8.89372920	-1.60217686		13.00000000	2.64153846	23.49312775	0.297269
14	-0.16999699	8.90308950	-1.51349842		14.00000000	2.45285714	21.83800667	0.318650
15	-0.16017318	8.89611530	-1.42491908		15.00000000	2.28933333	20.36617329	0.340126
16	-0.15002486	8.89977550	-1.33518757		16.00000000	2.14625000	19.10114317	0.361504
17	-0.13986240	8.90072540	-1.24487682		17.00000000	2.02000000	17.97946531	0.382861
18	-0.13001552	8.90827180	-1.15821359		18.00000000	1.90777778	16.99500298	0.404237
19	-0.11990665	8.88917640	-1.06587136		19.00000000	1.80736842	16.06601671	0.425723
20	-0.11008656	8.90232090	-0.98002588		20.00000000	1.71700000	15.28528499	0.447101
21	-0.09992336	8.89799980	-0.88911801		21.00000000	1.63523810	14.55034824	0.468440
22	-0.09008838	8.89021590	-0.80090517		22.00000000	1.56090909	13.87681882	0.489826
23	-0.07994602	8.90214730	-0.71169124		23.00000000	1.49304348	13.29129297	0.511308
24	-0.07013412	8.90158270	-0.62430465		24.00000000	1.43083333	12.73668125	0.532695
25	-0.05996049	8.89345550	-0.53325597		25.00000000	1.37360000	12.21605047	0.554048
26	-0.04985460	8.88424020	-0.44292023		26.00000000	1.32076923	11.73403109	0.575423
27	-0.04001516	8.90324500	-0.35626478		27.00000000	1.27185185	11.32360864	0.596901
28	-0.02987950	8.89658450	-0.26582546		28.00000000	1.22642857	10.91102542	0.618274
29	-0.02005717	8.89843370	-0.17847742		29.00000000	1.18413793	10.53697287	0.639654
30	-0.00988802	8.90596680	-0.08806234		30.00000000	1.14466667	10.19436333	0.661009
31	-0.00065294	8.89120580	-0.00580538		31.00000000	1.10774194	9.84916152	0.682608
32	0.00947806	8.89266590	0.08428519		32.00000000	1.07312500	9.54294209	0.704042
33	0.01927033	8.89912990	0.17148914		33.00000000	1.04060606	9.26048851	0.725448
34	0.02944143	8.89564130	0.26190037		34.00000000	1.01000000	8.98459771	0.746860
35	0.03925082	8.89317040	0.34906420		35.00000000	0.98114286	8.72547062	0.768340
36	0.04942192	8.90649800	0.44017621		36.00000000	0.95388889	8.49580948	0.789733
37	0.05921940	8.89074520	0.52650458		37.00000000	0.92810811	8.25157271	0.811131
38	0.06939199	8.89613060	0.61732019		38.00000000	0.90368421	8.03929276	0.832492
39	0.07951248	8.89291290	0.70709753		39.00000000	0.88051282	7.83032382	0.853985
40	0.08934196	8.90903950	0.79595106		40.00000000	0.85850000	7.64841041	0.875364
41	0.09947883	8.90581040	0.88593956		41.00000000	0.83756098	7.45915925	0.896755
42	0.10931799	8.90412620	0.97338118		42.00000000	0.81761905	7.28018318	0.918116
43	0.11945336	8.90002440	1.06313782		43.00000000	0.79860465	7.10760088	0.939603
44	0.12926871	8.88636780	1.14872930		44.00000000	0.78045455	6.93540614	0.960987
45	0.13943310	8.89696310	1.24053115		45.00000000	0.76311111	6.78937140	0.982381
46	0.14922538	8.89115240	1.32678560		46.00000000	0.74652174	6.63743855	1.003726
47	0.15937340	8.90362070	1.41900030		47.00000000	0.73063830	6.50532627	1.025191
48	0.16950953	8.88797860	1.50659708		48.00000000	0.71541667	6.35860802	1.046566
49	0.17936952	8.89698700	1.59584829		49.00000000	0.70081633	6.23515375	1.067952
50	0.18950416	8.89449690	1.68554416		50.00000000	0.68680000	6.10874047	1.089437
51	0.19929047	8.89783290	1.77325330		51.00000000	0.67333333	5.99120749	1.110807
52	0.20945190	8.89698030	1.86348943		52.00000000	0.66038462	5.87542891	1.132206
53	0.21927394	8.89035800	1.94942383		53.00000000	0.64792453	5.76028101	1.153578
54	0.22941676	8.89613060	2.04092146		54.00000000	0.63592593	5.65728009	1.175057
55	0.23925965	8.89981370	2.12936631		55.00000000	0.62436364	5.55672004	1.196442
56	0.24938162	8.89112090	2.21728213		56.00000000	0.61321429	5.45216235	1.217796
57	0.25950062	8.89279270	2.30768522		57.00000000	0.60245614	5.35751757	1.239174
58	0.26935989	8.89540480	2.39606526		58.00000000	0.59206897	5.26669312	1.260665
59	0.27950493	8.88459210	2.48328729		59.00000000	0.58203390	5.17113377	1.282041
60	0.28929570	8.89681150	2.57380931		60.00000000	0.57233333	5.09194178	1.303387
61	0.29946682	8.89962200	2.66514150		61.00000000	0.56295082	5.01004950	1.324764
62	0.30926505	8.88711550	2.74847422		62.00000000	0.55387097	4.92231526	1.346242
63	0.31943613	8.89173790	2.84034234		63.00000000	0.54507937	4.84670285	1.367609
64	0.32924628	8.89163490	2.92753771		64.00000000	0.53656250	4.77091785	1.388967
65	0.33941215	8.89262960	3.01826653		65.00000000	0.52830769	4.69804462	1.410336
66	0.34919924	8.88682840	3.10327372		66.00000000	0.52030303	4.62384375	1.431804
67	0.35933906	8.89207170	3.19526869		67.00000000	0.51253731	4.55751854	1.453182
68	0.36950868	8.91470720	3.29406169		68.00000000	0.50500000	4.50192714	1.474525
69	0.37933668	8.87976550	3.36842076		69.00000000	0.49768116	4.41929199	1.495909
70	0.38948172	8.89751240	3.46541843		70.00000000	0.49057143	4.36486537	1.517385
71	0.39929929	8.88197520	3.54656639		71.00000000	0.48366197	4.29587364	1.538769
72	0.40945402	8.90283780	3.64530273		72.00000000	0.47694444	4.24615903	1.560143
73	0.41927755	8.86839580	3.71831926		73.00000000	0.47041096	4.17179057	1.581510
74	0.42941070	8.89280320	3.81866485		74.00000000	0.46405405	4.12674138	1.602988
75	0.43923274	8.89130400	3.90535182		75.00000000	0.45786667	4.07103172	1.624367
76	0.44938001	8.87947560	3.99025883		76.00000000	0.45184211	4.01212095	1.645757
77	0.45954144	8.86976240	4.07602339		77.00000000	0.44597403	3.95568365	1.667099
78	0.46939176	8.87658310	4.16659496		78.00000000	0.44025641	3.90797261	1.688561
79	0.47953534	8.85327240	4.24545699		79.00000000	0.43468354	3.84837183	1.709917
80	0.48939386	8.84758950	4.32995598		80.00000000	0.42925000	3.79782779	1.731288
81	0.49949127	8.82503700	4.40802894		81.00000000	0.42395062	3.74137988	1.752778
82	0.50933117	8.79823110	4.48121334		82.00000000	0.41878049	3.68452751	1.774159
83	0.51946431	8.76840880	4.55487543		83.00000000	0.41373494	3.62779709	1.795520
84	0.52923870	8.72010330	4.61501613		84.00000000	0.40880952	3.56486128	1.816904
85	0.53936440	8.63833140	4.65920843		85.00000000	0.40400000	3.48988589	1.838378
86	0.54951394	8.54634670	4.69633665		86.00000000	0.39930233	3.41257611	1.859763
87	0.55934340	8.38298030	4.68896470		87.00000000	0.39471264	3.30886832	1.881114
88	0.56944531	8.18001560	4.65807152		88.00000000	0.39022727	3.19206518	1.902493
89	0.57925767	7.88832190	4.56937096		89.00000000	0.38584270	3.04365139	1.923989
90	0.58936697	7.51665880	4.43007042		90.00000000	0.38155556	2.86802292	1.945361
91	0.59917563	6.98347380	4.18432731		91.00000000	0.37736264	2.63530209	1.966705
92	0.60929984	6.32121610	3.85151596		92.00000000	0.37326087	2.35946262	1.988198
93	0.61910331	5.48139480	3.39354966		93.00000000	0.36924731	2.02399029	2.009699
94	0.62920219	4.40827700	2.77369754		94.00000000	0.36531915	1.61042800	2.031090
95	0.63930857	3.09953780	1.98156108		95.00000000	0.36147368	1.12040135	2.052460
96	0.64911348	1.56191550	1.01386041		96.00000000	0.35770833	0.55871019	2.073839
97	0.65918481	-0.30632481	-0.20192466		97.00000000	0.35402062	-0.10844530	2.095320
98	0.66893542	-2.42484950	-1.62206772		98.00000000	0.35040816	-0.84968706	2.116696
99	0.67895246	-5.00167320	-3.39589832		99.00000000	0.34686869	-1.73492382	2.138053
100	0.68887347	-7.91633560	-5.45335357		100.00000000	0.34340000	-2.71846965	2.159430
101	0.69513798	-9.99739740	-6.94957063		101.00000000	0.34000000	-3.39911512	2.180915
15:59 02/04/2018
Test Lot:	JK-PERC
Recipe:	Recipe_YJX-LID
Cell Name:	1-10-2h
Test Order:	3
Test Condition:	Light
1	-0.29989329	8.89684010	-2.66810265		1.00000000	34.34000000	305.51748903	0.000000
2	-0.29007745	8.89902590	-2.58140674		2.00000000	17.17000000	152.79627470	0.061750
3	-0.27997059	8.90051460	-2.49188232		3.00000000	11.44666667	101.88122379	0.083286
4	-0.27010560	8.88883590	-2.40092435		4.00000000	8.58500000	76.31065620	0.104691
5	-0.25996822	8.89979360	-2.31366350		5.00000000	6.86800000	61.12378244	0.126051
6	-0.24982862	8.89506910	-2.22224284		6.00000000	5.72333333	50.90944548	0.147431
7	-0.23998746	8.89907260	-2.13566583		7.00000000	4.90571429	43.65630758	0.168923
8	-0.22981735	8.89078040	-2.04325559		8.00000000	4.29250000	38.16367487	0.190311
9	-0.21998809	8.90456490	-1.95889822		9.00000000	3.81555556	33.97586207	0.211664
10	-0.20988049	8.89414600	-1.86670772		10.00000000	3.43400000	30.54249736	0.233050
11	-0.20001180	8.88655950	-1.77741676		11.00000000	3.12181818	27.74222302	0.254537
12	-0.18993695	8.89167980	-1.68885854		12.00000000	2.86166667	25.44502369	0.275924
13	-0.18011291	8.89326000	-1.60179094		13.00000000	2.64153846	23.49188834	0.297272
14	-0.16996139	8.89071660	-1.51107855		14.00000000	2.45285714	21.80765772	0.318654
15	-0.16015671	8.90059660	-1.42549027		15.00000000	2.28933333	20.37643248	0.340137
16	-0.15000445	8.88816830	-1.33326480		16.00000000	2.14625000	19.07623121	0.361516
17	-0.13986038	8.89818480	-1.24450351		17.00000000	2.02000000	17.97433330	0.382864
18	-0.13004304	8.89058690	-1.15615895		18.00000000	1.90777778	16.96126412	0.404244
19	-0.11990491	8.89426800	-1.06646640		19.00000000	1.80736842	16.07521911	0.425722
20	-0.11007866	8.89458850	-0.97910438		20.00000000	1.71700000	15.27200845	0.447113
21	-0.09989066	8.89297490	-0.88832511		21.00000000	1.63523810	14.54213134	0.468476
22	-0.09010608	8.89268970	-0.80128538		22.00000000	1.56090909	13.88068020	0.489857
23	-0.07996646	8.89386750	-0.71121113		23.00000000	1.49304348	13.27893087	0.511343
24	-0.07012829	8.88925650	-0.62338838		24.00000000	1.43083333	12.71904451	0.532728
25	-0.05996709	8.90419290	-0.53395856		25.00000000	1.37360000	12.23079937	0.554121
26	-0.04984460	8.88816550	-0.44302705		26.00000000	1.32076923	11.73921551	0.575485
27	-0.04003174	8.90979670	-0.35667462		27.00000000	1.27185185	11.33194143	0.596965
28	-0.02985565	8.89600180	-0.26559593		28.00000000	1.22642857	10.91031078	0.618340
29	-0.02005842	8.89195820	-0.17835860		29.00000000	1.18413793	10.52930499	0.639765
30	-0.00986000	8.89992240	-0.08775327		30.00000000	1.14466667	10.18744451	0.661232
31	-0.00063960	8.88712690	-0.00568422		31.00000000	1.10774194	9.84464315	0.682806
32	0.00949757	8.89691350	0.08449907		32.00000000	1.07312500	9.54750030	0.704191
33	0.01928634	8.89109040	0.17147657		33.00000000	1.04060606	9.25212256	0.725573
34	0.02947255	8.88705730	0.26192426		34.00000000	1.01000000	8.97592787	0.746915
35	0.03930226	8.89463330	0.34957915		35.00000000	0.98114286	8.72690593	0.768406
36	0.04943563	8.90126710	0.44003972		36.00000000	0.95388889	8.49081978	0.789801
37	0.05926012	8.89353370	0.52703189		37.00000000	0.92810811	8.25416074	0.811208
38	0.06938456	8.89233880	0.61699102		38.00000000	0.90368421	8.03586617	0.832585
39	0.07954174	8.89741040	0.70771553		39.00000000	0.88051282	7.83428393	0.854074
40	0.08933052	8.88854600	0.79401841		40.00000000	0.85850000	7.63081674	0.875468
41	0.09952566	8.89961530	0.88574009		41.00000000	0.83756098	7.45397047	0.896855
42	0.10934345	8.88940330	0.97199803		42.00000000	0.81761905	7.26814546	0.918201
43	0.11948203	8.89160630	1.06238717		43.00000000	0.79860465	7.10087815	0.939675
44	0.12931249	8.88796810	1.14932529		44.00000000	0.78045455	6.93665510	0.961052
45	0.13941459	8.89287950	1.23979715		45.00000000	0.76311111	6.78625516	0.982437
46	0.14926216	8.88813020	1.32666151		46.00000000	0.74652174	6.63518241	1.003928
47	0.15942083	8.89086530	1.41738913		47.00000000	0.73063830	6.49600669	1.025310
48	0.16955197	8.90721990	1.51023668		48.00000000	0.71541667	6.37237357	1.046660
49	0.17936307	8.89137940	1.59478511		49.00000000	0.70081633	6.23122385	1.068040
50	0.18952100	8.89281940	1.68537603		50.00000000	0.68680000	6.10758836	1.089526
51	0.19928297	8.89102550	1.77182997		51.00000000	0.67333333	5.98662384	1.110906
52	0.20943496	8.88779640	1.86141528		52.00000000	0.66038462	5.86936401	1.132269
53	0.21926615	8.89271260	1.94987085		53.00000000	0.64792453	5.76180662	1.153642
54	0.22940175	8.88814540	2.03895611		54.00000000	0.63592593	5.65220209	1.175120
55	0.23921806	8.89333340	2.12744596		55.00000000	0.62436364	5.55267398	1.196512
56	0.24939311	8.89464860	2.21826408		56.00000000	0.61321429	5.45432559	1.217857
57	0.25949818	8.89496420	2.30822702		57.00000000	0.60245614	5.35882580	1.239235
58	0.26934800	8.88865760	2.39414215		58.00000000	0.59206897	5.26269831	1.260716
59	0.27949551	8.89981840	2.48745928		59.00000000	0.58203390	5.17999600	1.282092
60	0.28931329	8.89237880	2.57268337		60.00000000	0.57233333	5.08940480	1.303463
61	0.29946750	8.88347240	2.66031127		61.00000000	0.56295082	5.00095807	1.324842
62	0.30930465	8.90113350	2.75316198		62.00000000	0.55387097	4.93007943	1.346325
63	0.31945217	8.89280800	2.84082681		63.00000000	0.54507937	4.84728614	1.367708
64	0.32926252	8.88856220	2.92667039		64.00000000	0.53656250	4.76926916	1.389104
65	0.33940333	8.90018560	3.02075263		65.00000000	0.52830769	4.70203652	1.410500
66	0.34921518	8.88552860	3.10296147		66.00000000	0.52030303	4.62316746	1.431987
67	0.35936862	8.89723680	3.19738771		67.00000000	0.51253731	4.56016585	1.453368
68	0.36950648	8.88920310	3.28461815		68.00000000	0.50500000	4.48904757	1.474733
69	0.37935850	8.89236550	3.37339444		69.00000000	0.49768116	4.42556277	1.496153
70	0.38951421	8.89411640	3.46438472		70.00000000	0.49057143	4.36319939	1.517646
71	0.39933497	8.89228250	3.55099937		71.00000000	0.48366197	4.30085889	1.539054
72	0.40948248	8.87901970	3.63580301		72.00000000	0.47694444	4.23479912	1.560443
73	0.41930774	8.88428970	3.72525144		73.00000000	0.47041096	4.17926724	1.581782
74	0.42945004	8.88747410	3.81672611		74.00000000	0.46405405	4.12426839	1.603257
75	0.43925741	8.88693330	3.90365130		75.00000000	0.45786667	4.06903053	1.624627
76	0.44942129	8.87155340	3.98706497		76.00000000	0.45184211	4.00854137	1.646000
77	0.45955020	8.87435050	4.07820955		77.00000000	0.44597403	3.95772982	1.667495
78	0.46941116	8.86748790	4.16249778		78.00000000	0.44025641	3.90396839	1.688880
79	0.47955123	8.85822300	4.24797174		79.00000000	0.43468354	3.85052377	1.710226
80	0.48935190	8.84621050	4.32890992		80.00000000	0.42925000	3.79723586	1.731610
81	0.49950612	8.82234100	4.40681332		81.00000000	0.42395062	3.74023691	1.753091
82	0.50932240	8.80337140	4.48375425		82.00000000	0.41878049	3.68668017	1.774472
83	0.51945579	8.77253910	4.55694623		83.00000000	0.41373494	3.62950594	1.795826
84	0.52924603	8.72039600	4.61523496		84.00000000	0.40880952	3.56498094	1.817209
85	0.53937715	8.63938240	4.65988546		85.00000000	0.40400000	3.49031049	1.838694
86	0.54953957	8.52045920	4.68232948		86.00000000	0.39930233	3.40223917	1.860063
87	0.55931497	8.38970850	4.69248956		87.00000000	0.39471264	3.31152402	1.881419
88	0.56946099	8.17168710	4.65345703		88.00000000	0.39022727	3.18881517	1.902796
89	0.57924825	7.88656280	4.56827770		89.00000000	0.38584270	3.04297266	1.924282
90	0.58939207	7.50642300	4.42422619		90.00000000	0.38155556	2.86411740	1.945666
91	0.59919494	7.00130750	4.19514803		91.00000000	0.37736264	2.64203186	1.967014
92	0.60931420	6.31857010	3.84999449		92.00000000	0.37326087	2.35847497	1.988492
93	0.61907989	5.49008890	3.39880363		93.00000000	0.36924731	2.02720057	2.009994
94	0.62923336	4.41830590	2.78014547		94.00000000	0.36531915	1.61409175	2.031442
95	0.63934439	3.10153790	1.98295086		95.00000000	0.36147368	1.12112433	2.052800
96	0.64911526	1.57582990	1.02289524		96.00000000	0.35770833	0.56368749	2.074181
97	0.65919286	-0.29014951	-0.19126449		97.00000000	0.35402062	-0.10271891	2.095676
98	0.66894662	-2.41606090	-1.61621577		98.00000000	0.35040816	-0.84660746	2.117062
99	0.67901820	-4.97913740	-3.38092491		99.00000000	0.34686869	-1.72710685	2.138469
100	0.68891120	-7.89084580	-5.43609205		100.00000000	0.34340000	-2.70971645	2.159838
101	0.69525248	-9.99720100	-6.95057879		101.00000000	0.34000000	-3.39904834	2.181316
15:59 02/04/2018
Test Lot:	JK-PERC
Recipe:	Recipe_YJX-LID
Cell Name:	1-10-2h
Test Order:	4
Test Condition:	Light
1	-0.29990414	8.89033700	-2.66624887		1.00000000	34.34000000	305.29417258	0.000000
2	-0.29011455	8.89600560	-2.58086066		2.00000000	17.17000000	152.74441615	0.061725
3	-0.27997664	8.89327530	-2.48990934		3.00000000	11.44666667	101.79835793	0.083245
4	-0.27013272	8.89636330	-2.40319882		4.00000000	8.58500000	76.37527893	0.104646
5	-0.25998586	8.89173320	-2.31172490		5.00000000	6.86800000	61.06842362	0.125999
6	-0.24984051	8.90020280	-2.22363121		6.00000000	5.72333333	50.93882736	0.147372
7	-0.24003604	8.89110570	-2.13418580		7.00000000	4.90571429	43.61722425	0.168894
8	-0.22983411	8.89979930	-2.04547745		8.00000000	4.29250000	38.20238850	0.190281
9	-0.22000210	8.88990590	-1.95579797		9.00000000	3.81555556	33.91992985	0.211656
10	-0.20985675	8.90924840	-1.86966591		10.00000000	3.43400000	30.59435901	0.233037
11	-0.20002474	8.89001270	-1.77822248		11.00000000	3.12181818	27.75300328	0.254526
12	-0.18989873	8.90406800	-1.69087121		12.00000000	2.86166667	25.48047459	0.275920
13	-0.18010765	8.90143780	-1.60321704		13.00000000	2.64153846	23.51349031	0.297266
14	-0.16998835	8.88992600	-1.51118385		14.00000000	2.45285714	21.80571849	0.318638
15	-0.16015112	8.90098570	-1.42550283		15.00000000	2.28933333	20.37732326	0.340124
16	-0.14999087	8.90334030	-1.33541976		16.00000000	2.14625000	19.10879412	0.361497
17	-0.13985743	8.89630130	-1.24421384		17.00000000	2.02000000	17.97052863	0.382863
18	-0.13002393	8.90311050	-1.15761742		18.00000000	1.90777778	16.98515637	0.404233
19	-0.11987187	8.89667990	-1.06646166		19.00000000	1.80736842	16.07957830	0.425718
20	-0.11006740	8.87635140	-0.97699692		20.00000000	1.71700000	15.24069535	0.447105
21	-0.09992650	8.90012650	-0.88935851		21.00000000	1.63523810	14.55382591	0.468497
22	-0.09008183	8.88442230	-0.80032505		22.00000000	1.56090909	13.86777554	0.489837
23	-0.07996029	8.89784340	-0.71147417		23.00000000	1.49304348	13.28486706	0.511297
24	-0.07015359	8.89484600	-0.62400535		24.00000000	1.43083333	12.72704215	0.532659
25	-0.05999260	8.89633460	-0.53371424		25.00000000	1.37360000	12.22000521	0.554042
26	-0.04982640	8.88712220	-0.44281332		26.00000000	1.32076923	11.73783755	0.575531
27	-0.04004053	8.89742760	-0.35625775		27.00000000	1.27185185	11.31620977	0.596910
28	-0.02987136	8.89081190	-0.26558065		28.00000000	1.22642857	10.90394574	0.618252
29	-0.02005349	8.89938160	-0.17846365		29.00000000	1.18413793	10.53809532	0.639645
30	-0.00991185	8.88756470	-0.08809223		30.00000000	1.14466667	10.17329906	0.661121
31	-0.00067527	8.89919850	-0.00600935		31.00000000	1.10774194	9.85801537	0.682617
32	0.00946616	8.88776020	0.08413296		32.00000000	1.07312500	9.53767766	0.703998
33	0.01927631	8.89154620	0.17139620		33.00000000	1.04060606	9.25259686	0.725381
34	0.02944966	8.88955590	0.26179440		34.00000000	1.01000000	8.97845146	0.746863
35	0.03927172	8.91118430	0.34995750		35.00000000	0.98114286	8.74314482	0.768240
36	0.04941307	8.88090900	0.43883294		36.00000000	0.95388889	8.47140042	0.789583
37	0.05919940	8.90559010	0.52720556		37.00000000	0.92810811	8.26535038	0.810977
38	0.06937423	8.89420320	0.61702853		38.00000000	0.90368421	8.03755100	0.832470
39	0.07951335	8.89232920	0.70705888		39.00000000	0.88051282	7.82980986	0.853853
40	0.08930340	8.90034680	0.79483127		40.00000000	0.85850000	7.64094773	0.875214
41	0.09949090	8.89317230	0.88478968		41.00000000	0.83756098	7.44857407	0.896593
42	0.10934347	8.88953880	0.97201302		42.00000000	0.81761905	7.26825625	0.918075
43	0.11947067	8.88566680	1.06157657		43.00000000	0.79860465	7.09613484	0.939474
44	0.12929869	8.89271640	1.14981658		44.00000000	0.78045455	6.94036094	0.960829
45	0.13946013	8.89345260	1.24028206		45.00000000	0.76311111	6.78669250	0.982202
46	0.14926283	8.88436030	1.32610476		46.00000000	0.74652174	6.63236810	1.003699
47	0.15943693	8.88425160	1.41647780		47.00000000	0.73063830	6.49117447	1.025075
48	0.16955744	8.88447860	1.50642945		48.00000000	0.71541667	6.35610407	1.046439
49	0.17936908	8.90056990	1.59648703		49.00000000	0.70081633	6.23766470	1.067816
50	0.18951340	8.89870450	1.68642375		50.00000000	0.68680000	6.11163025	1.089297
51	0.19929825	8.89501760	1.77276144		51.00000000	0.67333333	5.98931185	1.110685
52	0.20944406	8.87311740	1.85842173		52.00000000	0.66038462	5.85967022	1.132069
53	0.21927653	8.90308860	1.95223837		53.00000000	0.64792453	5.76852948	1.153420
54	0.22941862	8.89190010	2.03996745		54.00000000	0.63592593	5.65458980	1.174903
55	0.23923993	8.90225220	2.12977419		55.00000000	0.62436364	5.55824256	1.196283
56	0.24936864	8.88912870	2.21666993		56.00000000	0.61321429	5.45094071	1.217666
57	0.25950626	8.88900180	2.30675161		57.00000000	0.60245614	5.35523372	1.239149
58	0.26932013	8.89833740	2.39650139		58.00000000	0.59206897	5.26842942	1.260545
59	0.27944735	8.88733770	2.48354297		59.00000000	0.58203390	5.17273181	1.281890
60	0.28931999	8.88535500	2.57071082		60.00000000	0.57233333	5.08538485	1.303274
61	0.29944050	8.89626600	2.66390234		61.00000000	0.56295082	5.00816024	1.324767
62	0.30926481	8.88336560	2.74731237		62.00000000	0.55387097	4.92023830	1.346158
63	0.31942475	8.89898300	2.84255542		63.00000000	0.54507937	4.85065200	1.367514
64	0.32922152	8.89989280	2.93003624		64.00000000	0.53656250	4.77534873	1.388896
65	0.33940601	8.88911150	3.01701787		65.00000000	0.52830769	4.69618598	1.410373
66	0.34920651	8.88318920	3.10206750		66.00000000	0.52030303	4.62195026	1.431752
67	0.35937315	8.88883300	3.19440792		67.00000000	0.51253731	4.55585859	1.453115
68	0.36953682	8.88030150	3.28159838		68.00000000	0.50500000	4.48455226	1.474499
69	0.37933803	8.89185710	3.37301956		69.00000000	0.49768116	4.42530975	1.495982
70	0.38948905	8.87344460	3.45610951		70.00000000	0.49057143	4.35305839	1.517366
71	0.39929324	8.88898180	3.54931034		71.00000000	0.48366197	4.29926246	1.538732
72	0.40944874	8.88023660	3.63600169		72.00000000	0.47694444	4.23537951	1.560153
73	0.41929314	8.89765930	3.73072751		73.00000000	0.47041096	4.18555644	1.581636
74	0.42942628	8.87958050	3.81312522		74.00000000	0.46405405	4.12060533	1.603031
75	0.43924761	8.88936520	3.90463242		75.00000000	0.45786667	4.07014401	1.624375
76	0.44942766	8.88250160	3.99204191		76.00000000	0.45184211	4.01348822	1.645752
77	0.45956007	8.86921020	4.07593486		77.00000000	0.44597403	3.95543738	1.667227
78	0.46941859	8.87182710	4.16460057		78.00000000	0.44025641	3.90587875	1.688616
79	0.47954804	8.86180590	4.24966165		79.00000000	0.43468354	3.85208120	1.709987
80	0.48937008	8.84448430	4.32822599		80.00000000	0.42925000	3.79649489	1.731350
81	0.49949953	8.83272080	4.41193989		81.00000000	0.42395062	3.74463744	1.752838
82	0.50932753	8.80060960	4.48239275		82.00000000	0.41878049	3.68552358	1.774226
83	0.51944208	8.76639650	4.55363523		83.00000000	0.41373494	3.62696453	1.795609
84	0.52922398	8.71905230	4.61433156		84.00000000	0.40880952	3.56443162	1.816969
85	0.53934598	8.63549800	4.65752113		85.00000000	0.40400000	3.48874119	1.838445
86	0.54951262	8.52706530	4.68572999		86.00000000	0.39930233	3.40487700	1.859824
87	0.55932426	8.38877390	4.69204475		87.00000000	0.39471264	3.31115512	1.881206
88	0.56945515	8.16962810	4.65223680		88.00000000	0.39022727	3.18801169	1.902693
89	0.57924670	7.89127780	4.57099662		89.00000000	0.38584270	3.04479191	1.924081
90	0.58936203	7.50483800	4.42306656		90.00000000	0.38155556	2.86351263	1.945439
91	0.59915727	6.98607920	4.18576014		91.00000000	0.37736264	2.63628527	1.966829
92	0.60928375	6.31442120	3.84727423		92.00000000	0.37326087	2.35692635	1.988395
93	0.61905819	5.48640580	3.39640444		93.00000000	0.36924731	2.02584059	2.009793
94	0.62920475	4.41798260	2.77981564		94.00000000	0.36531915	1.61397364	2.031141
95	0.63928801	3.09853790	1.98085813		95.00000000	0.36147368	1.12003991	2.052520
96	0.64905351	1.57261470	1.02071109		96.00000000	0.35770833	0.56253738	2.074017
97	0.65916806	-0.29274210	-0.19296624		97.00000000	0.35402062	-0.10363674	2.095393
98	0.66894400	-2.43297480	-1.62752389		98.00000000	0.35040816	-0.85253423	2.116743
99	0.67894614	-5.00412460	-3.39753108		99.00000000	0.34686869	-1.73577413	2.138124
100	0.68889397	-7.95026020	-5.47688631		100.00000000	0.34340000	-2.73011935	2.159654
101	0.69505650	-9.99747660	-6.94881109		101.00000000	0.34000000	-3.39914204	2.181044
16:08 02/04/2018
Test Lot:	JK-PERC
Recipe:	Recipe_kaifu
Cell Name:	1-10-2h
Test Order:	5
Test Condition:	Dark
