# Supplementary material for: Study on the Electrical Injection Regeneration of Industrialized B-Doped Czochralski Silicon PERC Solar Cells
Source: Hindawi journal article supplement (doi:10.1155/2019/5357370), 2019-06-20
Supplement: f1 [file 5357370.f1.zip › section3.2/IVRawData_1-10-3h.csv]

17:29 02/04/2018
Test Lot:	JK-PERC
Recipe:	Recipe_YJX-LID
Cell Name:	1-10-3h
Test Order:	2
Test Condition:	Light
1	-0.29995894	8.90800290	-2.67203511		1.00000000	34.34000000	305.90081959	0.000000
2	-0.29016340	8.89730170	-2.58167131		2.00000000	17.17000000	152.76667019	0.061730
3	-0.27998230	8.90784070	-2.49403773		3.00000000	11.44666667	101.96508321	0.083247
4	-0.27018601	8.91889380	-2.40976033		4.00000000	8.58500000	76.56870327	0.104630
5	-0.26002350	8.90028290	-2.31428271		5.00000000	6.86800000	61.12714296	0.125978
6	-0.24988185	8.91333960	-2.22728179		6.00000000	5.72333333	51.01401364	0.147353
7	-0.24010415	8.90592860	-2.13835042		7.00000000	4.90571429	43.68994116	0.168845
8	-0.22992603	8.90685750	-2.04791838		8.00000000	4.29250000	38.23268582	0.190229
9	-0.22013047	8.91833970	-1.96319831		9.00000000	3.81555556	34.02842059	0.211597
10	-0.20997542	8.90177920	-1.86915483		10.00000000	3.43400000	30.56870977	0.232970
11	-0.20013520	8.91291240	-1.78378751		11.00000000	3.12181818	27.82449198	0.254457
12	-0.18999653	8.90844820	-1.69257425		12.00000000	2.86166667	25.49300927	0.275839
13	-0.18022256	8.91196440	-1.60613704		13.00000000	2.64153846	23.54129673	0.297207
14	-0.17008910	8.90426450	-1.51451833		14.00000000	2.45285714	21.84088878	0.318627
15	-0.16022730	8.90075300	-1.42614362		15.00000000	2.28933333	20.37679053	0.340131
16	-0.15009904	8.91733840	-1.33848393		16.00000000	2.14625000	19.13883754	0.361516
17	-0.13993952	8.89469150	-1.24471886		17.00000000	2.02000000	17.96727683	0.382888
18	-0.13011271	8.90444470	-1.15858143		18.00000000	1.90777778	16.98770172	0.404260
19	-0.11997626	8.91963770	-1.07014477		19.00000000	1.80736842	16.12107151	0.425737
20	-0.11015019	8.89674090	-0.97997770		20.00000000	1.71700000	15.27570413	0.447119
21	-0.09999663	8.91195770	-0.89116570		21.00000000	1.63523810	14.57317273	0.468496
22	-0.09015567	8.91296770	-0.80355457		22.00000000	1.56090909	13.91233231	0.489843
23	-0.08000211	8.90955450	-0.71278313		23.00000000	1.49304348	13.30235224	0.511326
24	-0.07019166	8.90843010	-0.62529749		24.00000000	1.43083333	12.74647873	0.532708
25	-0.06001652	8.90210630	-0.53427341		25.00000000	1.37360000	12.22793321	0.554083
26	-0.04986668	8.90717980	-0.44417145		26.00000000	1.32076923	11.76432901	0.575579
27	-0.04005772	8.90465350	-0.35670013		27.00000000	1.27185185	11.32540004	0.596954
28	-0.02990565	8.90086170	-0.26618605		28.00000000	1.22642857	10.91627110	0.618300
29	-0.02011753	8.90958980	-0.17923896		29.00000000	1.18413793	10.55018323	0.639683
30	-0.00996472	8.90785600	-0.08876426		30.00000000	1.14466667	10.19652583	0.661171
31	-0.00069537	8.89992050	-0.00618873		31.00000000	1.10774194	9.85881516	0.682716
32	0.00946022	8.90806580	0.08427225		32.00000000	1.07312500	9.55946811	0.704078
33	0.01928601	8.90521050	0.17174600		33.00000000	1.04060606	9.26681602	0.725455
34	0.02943184	8.90870860	0.26219969		34.00000000	1.01000000	8.99779569	0.746938
35	0.03926210	8.90286250	0.34954509		35.00000000	0.98114286	8.73497995	0.768324
36	0.04941388	8.90128520	0.43984706		36.00000000	0.95388889	8.49083705	0.789687
37	0.05922851	8.91698460	0.52813974		37.00000000	0.92810811	8.27592571	0.811071
38	0.06935573	8.90967850	0.61793729		38.00000000	0.90368421	8.05153578	0.832555
39	0.07949710	8.90777590	0.70814234		39.00000000	0.88051282	7.84341088	0.853929
40	0.08933034	8.90624240	0.79559764		40.00000000	0.85850000	7.64600910	0.875290
41	0.09946128	8.90717320	0.88591885		41.00000000	0.83756098	7.46030068	0.896667
42	0.10928930	8.91149430	0.97393097		42.00000000	0.81761905	7.28620748	0.918143
43	0.11943662	8.90521050	1.06360824		43.00000000	0.79860465	7.11174252	0.939529
44	0.12926540	8.90743830	1.15142357		44.00000000	0.78045455	6.95185071	0.960878
45	0.13941272	8.90966990	1.24212132		45.00000000	0.76311111	6.79906810	0.982261
46	0.14923032	8.89740850	1.32776312		46.00000000	0.74652174	6.64210887	1.003742
47	0.15938434	8.92174240	1.42198602		47.00000000	0.73063830	6.51856668	1.025118
48	0.16951826	8.89223190	1.50739568		48.00000000	0.71541667	6.36165091	1.046493
49	0.17935075	8.90497680	1.59711427		49.00000000	0.70081633	6.24075313	1.067856
50	0.18946308	8.90087130	1.68638649		50.00000000	0.68680000	6.11311841	1.089335
51	0.19927846	8.90492530	1.77455980		51.00000000	0.67333333	5.99598304	1.110719
52	0.20941982	8.89147570	1.86205124		52.00000000	0.66038462	5.87179376	1.132101
53	0.21925753	8.90639880	1.95279500		53.00000000	0.64792453	5.77067424	1.153448
54	0.22937730	8.90643220	2.04293337		54.00000000	0.63592593	5.66383114	1.174920
55	0.23922245	8.89932820	2.12891910		55.00000000	0.62436364	5.55641692	1.196293
56	0.24938391	8.91059590	2.22215925		56.00000000	0.61321429	5.46410470	1.217669
57	0.25953272	8.90409280	2.31090342		57.00000000	0.60245614	5.36432538	1.239155
58	0.26934138	8.89969350	2.39705573		58.00000000	0.59206897	5.26923232	1.260545
59	0.27947977	8.90713310	2.48936351		59.00000000	0.58203390	5.18425340	1.281896
60	0.28930184	8.90782260	2.57704947		60.00000000	0.57233333	5.09824380	1.303281
61	0.29945365	8.90834330	2.66763592		61.00000000	0.56295082	5.01495916	1.324766
62	0.30927870	8.90221020	2.75326400		62.00000000	0.55387097	4.93067578	1.346152
63	0.31945503	8.90174770	2.84370808		63.00000000	0.54507937	4.85215898	1.367505
64	0.32925105	8.90943150	2.93343968		64.00000000	0.53656250	4.78046684	1.388885
65	0.33941028	8.90579320	3.02271776		65.00000000	0.52830769	4.70499905	1.410366
66	0.34922192	8.91118530	3.11198124		66.00000000	0.52030303	4.63651672	1.431750
67	0.35933948	8.88869860	3.19406033		67.00000000	0.51253731	4.55578970	1.453085
68	0.36954039	8.91618540	3.29489063		68.00000000	0.50500000	4.50267363	1.474466
69	0.37934905	8.90000250	3.37620749		69.00000000	0.49768116	4.42936356	1.495946
70	0.38948074	8.88864710	3.46195685		70.00000000	0.49057143	4.36051631	1.517323
71	0.39931771	8.89631370	3.55245561		71.00000000	0.48366197	4.30280863	1.538684
72	0.40943822	8.90358160	3.64546660		72.00000000	0.47694444	4.24651378	1.560063
73	0.41927966	8.90283390	3.73277717		73.00000000	0.47041096	4.18799063	1.581547
74	0.42943442	8.89789960	3.82106435		74.00000000	0.46405405	4.12910638	1.602938
75	0.43921554	8.89046290	3.90482946		75.00000000	0.45786667	4.07064661	1.624288
76	0.44940677	8.89277270	3.99647226		76.00000000	0.45184211	4.01812914	1.645670
77	0.45951018	8.88747880	4.08388698		77.00000000	0.44597403	3.96358470	1.667144
78	0.46939179	8.87388130	4.16532703		78.00000000	0.44025641	3.90678313	1.688552
79	0.47950339	8.87613200	4.25613538		79.00000000	0.43468354	3.85830852	1.709923
80	0.48934108	8.86206530	4.33657260		80.00000000	0.42925000	3.80404153	1.731288
81	0.49948767	8.83486460	4.41290593		81.00000000	0.42395062	3.74554630	1.752768
82	0.50928813	8.83330250	4.49869611		82.00000000	0.41878049	3.69921473	1.774158
83	0.51945782	8.77983190	4.56075234		83.00000000	0.41373494	3.63252322	1.795555
84	0.52924711	8.73914530	4.62516739		84.00000000	0.40880952	3.57264583	1.816901
85	0.53934234	8.65552330	4.66829019		85.00000000	0.40400000	3.49683141	1.838380
86	0.54952019	8.56414130	4.70616855		86.00000000	0.39930233	3.41968154	1.859760
87	0.55933928	8.40774820	4.70278382		87.00000000	0.39471264	3.31864452	1.881138
88	0.56944788	8.20765970	4.67383442		88.00000000	0.39022727	3.20285266	1.902624
89	0.57925510	7.93305780	4.59526419		89.00000000	0.38584270	3.06091241	1.924009
90	0.58939570	7.54803560	4.44877973		90.00000000	0.38155556	2.87999492	1.945367
91	0.59917611	7.05337050	4.22621110		91.00000000	0.37736264	2.66167849	1.966737
92	0.60930032	6.39295670	3.89523056		92.00000000	0.37326087	2.38624058	1.988293
93	0.61905694	5.57325890	3.45016460		93.00000000	0.36924731	2.05791087	2.009733
94	0.62921095	4.51932190	2.84360683		94.00000000	0.36531915	1.65099483	2.031120
95	0.63934112	3.22519180	2.06199774		95.00000000	0.36147368	1.16582196	2.052505
96	0.64912599	1.73550180	1.12655932		96.00000000	0.35770833	0.62080346	2.073991
97	0.65914232	-0.11998574	-0.07908768		97.00000000	0.35402062	-0.04247743	2.095375
98	0.66894203	-2.22261810	-1.48680266		98.00000000	0.35040816	-0.77882353	2.116718
99	0.67896360	-4.74295620	-3.22029462		99.00000000	0.34686869	-1.64518299	2.138096
100	0.68888241	-7.62097070	-5.24995266		100.00000000	0.34340000	-2.61704134	2.159583
101	0.69613230	-9.99549010	-6.95818351		101.00000000	0.34000000	-3.39846663	2.180950
17:29 02/04/2018
Test Lot:	JK-PERC
Recipe:	Recipe_YJX-LID
Cell Name:	1-10-3h
Test Order:	3
Test Condition:	Light
1	-0.29994601	8.90955830	-2.67238646		1.00000000	34.34000000	305.95423202	0.000000
2	-0.29014078	8.89986710	-2.58221438		2.00000000	17.17000000	152.81071811	0.061806
3	-0.28001922	8.90213490	-2.49276887		3.00000000	11.44666667	101.89977082	0.083238
4	-0.27017307	8.91383740	-2.40827882		4.00000000	8.58500000	76.52529408	0.104732
5	-0.26002771	8.90712170	-2.31609846		5.00000000	6.86800000	61.17411184	0.126110
6	-0.24985629	8.90065960	-2.22388579		6.00000000	5.72333333	50.94144178	0.147477
7	-0.24004586	8.90199180	-2.13688628		7.00000000	4.90571429	43.67062834	0.168851
8	-0.22989975	8.89851000	-2.04576522		8.00000000	4.29250000	38.19685418	0.190333
9	-0.22008039	8.90672300	-1.96019507		9.00000000	3.81555556	33.98409642	0.211728
10	-0.20992459	8.89193820	-1.86663648		10.00000000	3.43400000	30.53491578	0.233076
11	-0.20012087	8.89787480	-1.78065045		11.00000000	3.12181818	27.77754733	0.254457
12	-0.18994349	8.90433790	-1.69132102		12.00000000	2.86166667	25.48124696	0.275935
13	-0.18017399	8.91067500	-1.60547187		13.00000000	2.64153846	23.53789073	0.297327
14	-0.17003533	8.89250370	-1.51203980		14.00000000	2.45285714	21.81204122	0.318714
15	-0.16024053	8.91666410	-1.42881098		15.00000000	2.28933333	20.41321635	0.340068
16	-0.15007506	8.90703960	-1.33672450		16.00000000	2.14625000	19.11673374	0.361545
17	-0.13991779	8.89664650	-1.24479912		17.00000000	2.02000000	17.97122593	0.382923
18	-0.13010810	8.91366200	-1.15973963		18.00000000	1.90777778	17.00528628	0.404310
19	-0.11995381	8.90029620	-1.06762444		19.00000000	1.80736842	16.08611429	0.425729
20	-0.11012700	8.89871410	-0.97998869		20.00000000	1.71700000	15.27909211	0.447197
21	-0.09998387	8.89720060	-0.88957656		21.00000000	1.63523810	14.54904136	0.468569
22	-0.09016823	8.89200690	-0.80177652		22.00000000	1.56090909	13.87961441	0.489965
23	-0.07999235	8.90339660	-0.71220358		23.00000000	1.49304348	13.29315823	0.511334
24	-0.07019977	8.89336680	-0.62431233		24.00000000	1.43083333	12.72492566	0.532822
25	-0.06001869	8.90588860	-0.53451975		25.00000000	1.37360000	12.23312858	0.554231
26	-0.04988151	8.89955330	-0.44392316		26.00000000	1.32076923	11.75425617	0.575597
27	-0.04004726	8.89766410	-0.35632705		27.00000000	1.27185185	11.31651056	0.596960
28	-0.02990785	8.88639450	-0.26577296		28.00000000	1.22642857	10.89852811	0.618446
29	-0.02006243	8.91851810	-0.17892718		29.00000000	1.18413793	10.56075557	0.639811
30	-0.00994089	8.89326670	-0.08840697		30.00000000	1.14466667	10.17982595	0.661188
31	-0.00067899	8.90564160	-0.00604686		31.00000000	1.10774194	9.86515266	0.682659
32	0.00947733	8.89974500	0.08434581		32.00000000	1.07312500	9.55053885	0.704139
33	0.01930237	8.90536120	0.17189456		33.00000000	1.04060606	9.26697284	0.725529
34	0.02945489	8.91110520	0.26247558		34.00000000	1.01000000	9.00021625	0.746919
35	0.03927174	8.89544770	0.34933969		35.00000000	0.98114286	8.72770497	0.768408
36	0.04941086	8.90132430	0.43982210		36.00000000	0.95388889	8.49087435	0.789779
37	0.05923813	8.90174770	0.52732291		37.00000000	0.92810811	8.26178422	0.811146
38	0.06935418	8.89754100	0.61708170		38.00000000	0.90368421	8.04056731	0.832526
39	0.07949702	8.90060140	0.70757132		39.00000000	0.88051282	7.83709364	0.854013
40	0.08933918	8.90121360	0.79522714		40.00000000	0.85850000	7.64169188	0.875396
41	0.09948574	8.88449670	0.88388073		41.00000000	0.83756098	7.44130772	0.896741
42	0.10927506	8.92825320	0.97563540		42.00000000	0.81761905	7.29990988	0.918132
43	0.11945809	8.89185140	1.06220358		43.00000000	0.79860465	7.10107389	0.939611
44	0.12927495	8.89827630	1.15032422		44.00000000	0.78045455	6.94470019	0.960987
45	0.13942747	8.90700150	1.24188068		45.00000000	0.76311111	6.79703181	0.982348
46	0.14923166	8.89172650	1.32692711		46.00000000	0.74652174	6.63786713	1.003730
47	0.15937674	8.89185620	1.41715505		47.00000000	0.73063830	6.49673068	1.025206
48	0.16952628	8.89879700	1.50857995		48.00000000	0.71541667	6.36634769	1.046595
49	0.17933345	8.89811130	1.59572900		49.00000000	0.70081633	6.23594167	1.067944
50	0.18948002	8.90224840	1.68679820		50.00000000	0.68680000	6.11406420	1.089359
51	0.19930357	8.90185450	1.77417138		51.00000000	0.67333333	5.99391536	1.110846
52	0.20941962	8.89851000	1.86352258		52.00000000	0.66038462	5.87643910	1.132225
53	0.21926549	8.89546110	1.95046764		53.00000000	0.64792453	5.76358744	1.153581
54	0.22938006	8.90918640	2.04358971		54.00000000	0.63592593	5.66558261	1.174954
55	0.23923486	8.90019610	2.12923717		55.00000000	0.62436364	5.55695880	1.196434
56	0.24937920	8.89361570	2.21788277		56.00000000	0.61321429	5.45369220	1.217821
57	0.25950044	8.91007710	2.31216893		57.00000000	0.60245614	5.36793066	1.239192
58	0.26932773	8.90459820	2.39825522		58.00000000	0.59206897	5.27213624	1.260548
59	0.27950108	8.89563180	2.48633870		59.00000000	0.58203390	5.17755925	1.282015
60	0.28932539	8.89560130	2.57372332		60.00000000	0.57233333	5.09124914	1.303398
61	0.29947567	8.89783480	2.66468504		61.00000000	0.56295082	5.00904339	1.324775
62	0.30929178	8.89566990	2.75135758		62.00000000	0.55387097	4.92705330	1.346139
63	0.31943387	8.89176650	2.84033138		63.00000000	0.54507937	4.84671844	1.367609
64	0.32928199	8.90638730	2.93271293		64.00000000	0.53656250	4.77883344	1.388987
65	0.33941069	8.89995860	3.02074109		65.00000000	0.52830769	4.70191659	1.410384
66	0.34922829	8.89695840	3.10706957		66.00000000	0.52030303	4.62911442	1.431862
67	0.35938600	8.89083000	3.19523983		67.00000000	0.51253731	4.55688212	1.453249
68	0.36953259	8.90854360	3.29199719		68.00000000	0.50500000	4.49881452	1.474603
69	0.37934941	8.89801500	3.37545674		69.00000000	0.49768116	4.42837442	1.495981
70	0.38950640	8.89365860	3.46413694		70.00000000	0.49057143	4.36297480	1.517464
71	0.39933443	8.89316650	3.55134758		71.00000000	0.48366197	4.30128645	1.538845
72	0.40948620	8.89717670	3.64327108		72.00000000	0.47694444	4.24345900	1.560196
73	0.41928890	8.88851740	3.72685668		73.00000000	0.47041096	4.18125599	1.581570
74	0.42945632	8.88763900	3.81685274		74.00000000	0.46405405	4.12434491	1.603062
75	0.43924859	8.89596180	3.90753868		75.00000000	0.45786667	4.07316438	1.624442
76	0.44940558	8.87552830	3.98871194		76.00000000	0.45184211	4.01033739	1.645794
77	0.45953876	8.89573190	4.08793361		77.00000000	0.44597403	3.96726537	1.667170
78	0.46936825	8.86868760	4.16268038		78.00000000	0.44025641	3.90449657	1.688648
79	0.47954831	8.86923690	4.25322757		79.00000000	0.43468354	3.85531133	1.710041
80	0.48937783	8.85792160	4.33487045		80.00000000	0.42925000	3.80226285	1.731394
81	0.49948716	8.83996960	4.41545131		81.00000000	0.42395062	3.74771057	1.752763
82	0.50930625	8.82199100	4.49309515		82.00000000	0.41878049	3.69447769	1.774255
83	0.51945657	8.76804830	4.55462030		83.00000000	0.41373494	3.62764794	1.795636
84	0.52923542	8.73075580	4.62062521		84.00000000	0.40880952	3.56921612	1.816995
85	0.53935373	8.64835550	4.66452280		85.00000000	0.40400000	3.49393562	1.838378
86	0.54949063	8.54409600	4.69490069		86.00000000	0.39930233	3.41167740	1.859856
87	0.55929780	8.40365600	4.70014631		87.00000000	0.39471264	3.31702928	1.881240
88	0.56946516	8.19623370	4.66746954		88.00000000	0.39022727	3.19839392	1.902599
89	0.57926047	7.91726880	4.58616085		89.00000000	0.38584270	3.05482034	1.923963
90	0.58939809	7.53763060	4.44266508		90.00000000	0.38155556	2.87602483	1.945438
91	0.59919184	7.04240800	4.21975341		91.00000000	0.37736264	2.65754166	1.966822
92	0.60928857	6.37306550	3.88303597		92.00000000	0.37326087	2.37881597	1.988338
93	0.61911285	5.57119850	3.44920058		93.00000000	0.36924731	2.05715007	2.009738
94	0.62921405	4.51028350	2.83793375		94.00000000	0.36531915	1.64769293	2.031235
95	0.63932931	3.22840450	2.06401362		95.00000000	0.36147368	1.16698327	2.052664
96	0.64911938	1.72060810	1.11688006		96.00000000	0.35770833	0.61547586	2.074067
97	0.65915507	-0.12259795	-0.08081106		97.00000000	0.35402062	-0.04340220	2.095575
98	0.66892427	-2.21251030	-1.48000184		98.00000000	0.35040816	-0.77528167	2.116957
99	0.67898971	-4.74168160	-3.21955301		99.00000000	0.34686869	-1.64474087	2.138313
100	0.68888474	-7.59173110	-5.22982770		100.00000000	0.34340000	-2.60700046	2.159682
101	0.69619489	-9.99522110	-6.95862185		101.00000000	0.34000000	-3.39837517	2.181177
17:30 02/04/2018
Test Lot:	JK-PERC
Recipe:	Recipe_YJX-LID
Cell Name:	1-10-3h
Test Order:	4
Test Condition:	Light
1	-0.29995194	8.90542790	-2.67120038		1.00000000	34.34000000	305.81239409	0.000000
2	-0.29012588	8.89401440	-2.58038375		2.00000000	17.17000000	152.71022725	0.021597
3	-0.27995002	8.90544130	-2.49307847		3.00000000	11.44666667	101.93761808	0.042988
4	-0.27017605	8.89592170	-2.40346499		4.00000000	8.58500000	76.37148779	0.064340
5	-0.26003218	8.90603160	-2.31585481		5.00000000	6.86800000	61.16662503	0.085721
6	-0.24988085	8.88955500	-2.22132956		6.00000000	5.72333333	50.87788645	0.107229
7	-0.24006373	8.90647410	-2.13812139		7.00000000	4.90571429	43.69261723	0.128641
8	-0.22993176	8.89846040	-2.04603866		8.00000000	4.29250000	38.19664127	0.150027
9	-0.22008039	8.90468690	-1.95974697		9.00000000	3.81555556	33.97632757	0.171394
10	-0.20992608	8.90513420	-1.86941991		10.00000000	3.43400000	30.58023084	0.192879
11	-0.20011267	8.90227700	-1.78145842		11.00000000	3.12181818	27.79129020	0.214270
12	-0.18998741	8.89783100	-1.69047587		12.00000000	2.86166667	25.46262638	0.235655
13	-0.18017995	8.90475180	-1.60445773		13.00000000	2.64153846	23.52224437	0.256998
14	-0.17005840	8.90881540	-1.51501889		14.00000000	2.45285714	21.85205149	0.278474
15	-0.16021225	8.89981170	-1.42585886		15.00000000	2.28933333	20.37463559	0.299855
16	-0.15005274	8.90799620	-1.33666924		16.00000000	2.14625000	19.11878684	0.321239
17	-0.13992301	8.89941790	-1.24523334		17.00000000	2.02000000	17.97682416	0.342718
18	-0.13012597	8.88959220	-1.15676681		18.00000000	1.90777778	16.95936645	0.364100
19	-0.11999400	8.90584470	-1.06864793		19.00000000	1.80736842	16.09614247	0.385451
20	-0.11013221	8.89552120	-0.97968341		20.00000000	1.71700000	15.27360990	0.406822
21	-0.09997048	8.91465190	-0.89120198		21.00000000	1.63523810	14.57757839	0.428300
22	-0.09016079	8.89289090	-0.80179004		22.00000000	1.56090909	13.88099425	0.449707
23	-0.07999682	8.89703850	-0.71173476		23.00000000	1.49304348	13.28366531	0.471061
24	-0.07017819	8.90735050	-0.62510172		24.00000000	1.43083333	12.74493401	0.492436
25	-0.06002687	8.89696500	-0.53405699		25.00000000	1.37360000	12.22087112	0.513931
26	-0.04987258	8.90482040	-0.44410638		26.00000000	1.32076923	11.76121279	0.535319
27	-0.04006289	8.90400600	-0.35672020		27.00000000	1.27185185	11.32457652	0.556664
28	-0.02992274	8.90089040	-0.26633898		28.00000000	1.22642857	10.91630630	0.578052
29	-0.02009518	8.90676590	-0.17898309		29.00000000	1.18413793	10.54683935	0.599529
30	-0.00994163	8.90152070	-0.08849564		30.00000000	1.14466667	10.18927403	0.620931
31	-0.00066857	8.90422820	-0.00595311		31.00000000	1.10774194	9.86358698	0.642396
32	0.00948179	8.89611530	0.08435113		32.00000000	1.07312500	9.54664373	0.663781
33	0.01929344	8.90821460	0.17187009		33.00000000	1.04060606	9.26994210	0.685259
34	0.02944521	8.89954660	0.26204902		34.00000000	1.01000000	8.98854207	0.706639
35	0.03926430	8.89886760	0.34940776		35.00000000	0.98114286	8.73106038	0.727985
36	0.04940788	8.89546780	0.43950621		36.00000000	0.95388889	8.48528790	0.749374
37	0.05921581	8.89810470	0.52690844		37.00000000	0.92810811	8.25840312	0.770845
38	0.06933781	8.90205860	0.61724923		38.00000000	0.90368421	8.04464980	0.792225
39	0.07949553	8.90001390	0.70751136		39.00000000	0.88051282	7.83657634	0.813600
40	0.08931760	8.91327290	0.79611212		40.00000000	0.85850000	7.65204478	0.834966
41	0.09945895	8.90003400	0.88518802		41.00000000	0.83756098	7.45432116	0.856462
42	0.10929813	8.89449690	0.97215188		42.00000000	0.81761905	7.27231008	0.877859
43	0.11946256	8.90562630	1.06388892		43.00000000	0.79860465	7.11207458	0.899247
44	0.12926824	8.89848330	1.15029127		44.00000000	0.78045455	6.94486174	0.920608
45	0.13940960	8.89968870	1.24070204		45.00000000	0.76311111	6.79145133	0.942085
46	0.14924431	8.89861390	1.32806749		46.00000000	0.74652174	6.64300872	0.963472
47	0.15939757	8.89566520	1.41794742		47.00000000	0.73063830	6.49951368	0.984863
48	0.16952255	8.89913750	1.50860448		48.00000000	0.71541667	6.36659129	1.006348
49	0.17935281	8.90712360	1.59751765		49.00000000	0.70081633	6.24225764	1.027736
50	0.18951052	8.89287470	1.68529331		50.00000000	0.68680000	6.10762634	1.049095
51	0.19928050	8.90849880	1.77529010		51.00000000	0.67333333	5.99838919	1.070477
52	0.20943598	8.88403990	1.86063760		52.00000000	0.66038462	5.86688327	1.091956
53	0.21925135	8.91412450	1.95443383		53.00000000	0.64792453	5.77567991	1.113363
54	0.22940387	8.89017770	2.03944117		54.00000000	0.63592593	5.65349449	1.134718
55	0.23924528	8.89717390	2.12860686		55.00000000	0.62436364	5.55507185	1.156095
56	0.24938738	8.89560790	2.21845235		56.00000000	0.61321429	5.45491384	1.177590
57	0.25952947	8.89852710	2.30943002		57.00000000	0.60245614	5.36097229	1.198965
58	0.26934931	8.89789960	2.39664312		58.00000000	0.59206897	5.26817021	1.220324
59	0.27948472	8.89773940	2.48678220		59.00000000	0.58203390	5.17878595	1.241697
60	0.28934249	8.89692500	2.57425843		60.00000000	0.57233333	5.09200674	1.263172
61	0.29948312	8.89818950	2.66485755		61.00000000	0.56295082	5.00924307	1.284575
62	0.30928805	8.90191650	2.75325640		62.00000000	0.55387097	4.93051311	1.305918
63	0.31945544	8.89935490	2.84294734		63.00000000	0.54507937	4.85085472	1.327287
64	0.32928199	8.89241890	2.92811339		64.00000000	0.53656250	4.77133852	1.348762
65	0.33942184	8.89966870	3.02074193		65.00000000	0.52830769	4.70176343	1.370138
66	0.34921265	8.89403440	3.10590932		66.00000000	0.52030303	4.62759305	1.391489
67	0.35937262	8.89588830	3.19693869		67.00000000	0.51253731	4.55947469	1.412883
68	0.36954075	8.90070820	3.28917438		68.00000000	0.50500000	4.49485764	1.434371
69	0.37935537	8.89371590	3.37387889		69.00000000	0.49768116	4.42623484	1.455747
70	0.38950267	8.90466690	3.46839153		70.00000000	0.49057143	4.36837516	1.477121
71	0.39932549	8.89253230	3.55101482		71.00000000	0.48366197	4.30097971	1.498487
72	0.40944675	8.90103720	3.64450075		72.00000000	0.47694444	4.24530024	1.519965
73	0.41927478	8.88566970	3.72553721		73.00000000	0.47041096	4.17991640	1.541360
74	0.42940718	8.89251230	3.81850863		74.00000000	0.46405405	4.12660638	1.562744
75	0.43925232	8.87931820	3.90026112		75.00000000	0.45786667	4.06554383	1.584095
76	0.44941527	8.89909930	3.99939111		76.00000000	0.45184211	4.02098776	1.605579
77	0.45958912	8.88107110	4.08164365		77.00000000	0.44597403	3.96072703	1.626954
78	0.46943858	8.87536140	4.16643705		78.00000000	0.44025641	3.90743475	1.688660
79	0.47956488	8.86239910	4.25009536		79.00000000	0.43468354	3.85233905	1.710047
80	0.48936075	8.85124300	4.33145091		80.00000000	0.42925000	3.79939606	1.731428
81	0.49950716	8.83790020	4.41459443		81.00000000	0.42395062	3.74683325	1.752911
82	0.50933427	8.81519990	4.48988341		82.00000000	0.41878049	3.69163371	1.774298
83	0.51948518	8.77359770	4.55775398		83.00000000	0.41373494	3.62994392	1.795651
84	0.52926093	8.72566890	4.61815564		84.00000000	0.40880952	3.56713655	1.817019
85	0.53937012	8.65387340	4.66764073		85.00000000	0.40400000	3.49616485	1.838505
86	0.54955226	8.54584120	4.69638635		86.00000000	0.39930233	3.41237427	1.859888
87	0.55936676	8.39462180	4.69567240		87.00000000	0.39471264	3.31346336	1.881245
88	0.56948191	8.21042350	4.67568766		88.00000000	0.39022727	3.20393117	1.902624
89	0.57929116	7.91345500	4.58419453		89.00000000	0.38584270	3.05334882	1.924112
90	0.58943087	7.53669360	4.44235987		90.00000000	0.38155556	2.87566731	1.945507
91	0.59920663	7.03601930	4.21602941		91.00000000	0.37736264	2.65513080	1.966859
92	0.60932994	6.37016730	3.88153366		92.00000000	0.37326087	2.37773419	1.988336
93	0.61911464	5.57102250	3.44910159		93.00000000	0.36924731	2.05708508	2.009847
94	0.62925440	4.50335600	2.83375658		94.00000000	0.36531915	1.64516218	2.031237
95	0.63932484	3.21833160	2.05755934		95.00000000	0.36147368	1.16334218	2.052586
96	0.64917505	1.71552220	1.11367421		96.00000000	0.35770833	0.61365659	2.073965
97	0.65918380	-0.13654394	-0.09000755		97.00000000	0.35402062	-0.04833937	2.095463
98	0.66900122	-2.22630520	-1.48940089		98.00000000	0.35040816	-0.78011552	2.116890
99	0.67904198	-4.75624660	-3.22969111		99.00000000	0.34686869	-1.64979301	2.138273
100	0.68892413	-7.64468620	-5.26660879		100.00000000	0.34340000	-2.62518524	2.159669
101	0.69607943	-9.99548910	-6.95765436		101.00000000	0.34000000	-3.39846629	2.181159
