# Supplementary material for: Study on the Electrical Injection Regeneration of Industrialized B-Doped Czochralski Silicon PERC Solar Cells
Source: Hindawi journal article supplement (doi:10.1155/2019/5357370), 2019-06-20
Supplement: f1 [file 5357370.f1.zip › section3.2/IVRawData_1-10-4h.csv]

18:48 02/04/2018
Test Lot:	JK-PERC
Recipe:	Recipe_YJX-LID
Cell Name:	1-10-4h
Test Order:	2
Test Condition:	Light
1	-0.29986975	8.93768220	-2.68014053		1.00000000	34.34000000	306.92000675	0.000000
2	-0.29010996	8.93678570	-2.59265054		2.00000000	17.17000000	153.44461047	0.061780
3	-0.27996534	8.92683120	-2.49920333		3.00000000	11.44666667	102.18246114	0.083271
4	-0.27010950	8.93230630	-2.41270079		4.00000000	8.58500000	76.68384959	0.104710
5	-0.25997829	8.93779560	-2.32363282		5.00000000	6.86800000	61.38478018	0.126097
6	-0.24984337	8.93678950	-2.23279761		6.00000000	5.72333333	51.14822524	0.147473
7	-0.24000095	8.92760370	-2.14263337		7.00000000	4.90571429	43.79627301	0.168987
8	-0.22983848	8.94028760	-2.05482211		8.00000000	4.29250000	38.37618452	0.190391
9	-0.22003102	8.92861840	-1.96457301		9.00000000	3.81555556	34.06763954	0.211744
10	-0.20989907	8.94088170	-1.87668275		10.00000000	3.43400000	30.70298776	0.233122
11	-0.20008045	8.93532090	-1.78778303		11.00000000	3.12181818	27.89444725	0.254610
12	-0.18989566	8.93500710	-1.69671907		12.00000000	2.86166667	25.56901198	0.275996
13	-0.18013138	8.92765710	-1.60815119		13.00000000	2.64153846	23.58274960	0.297344
14	-0.16996296	8.93742370	-1.51903099		14.00000000	2.45285714	21.92222356	0.318729
15	-0.16017561	8.93479350	-1.43113600		15.00000000	2.28933333	20.45472059	0.340209
16	-0.15000717	8.93579290	-1.34043300		16.00000000	2.14625000	19.17844551	0.361589
17	-0.13986406	8.93213650	-1.24928488		17.00000000	2.02000000	18.04291573	0.382944
18	-0.13007075	8.93223670	-1.16182273		18.00000000	1.90777778	17.04072268	0.404314
19	-0.11991125	8.93974300	-1.07197576		19.00000000	1.80736842	16.15740919	0.425794
20	-0.11007478	8.94083310	-0.98416024		20.00000000	1.71700000	15.35141043	0.447166
21	-0.09994506	8.94391350	-0.89389998		21.00000000	1.63523810	14.62542808	0.468506
22	-0.09009891	8.93350980	-0.80489950		22.00000000	1.56090909	13.94439666	0.489880
23	-0.07992155	8.93327430	-0.71396114		23.00000000	1.49304348	13.33776693	0.511354
24	-0.07015728	8.94028570	-0.62722608		24.00000000	1.43083333	12.79205879	0.532749
25	-0.05997545	8.93635180	-0.53596175		25.00000000	1.37360000	12.27497283	0.554110
26	-0.04983531	8.92720320	-0.44488993		26.00000000	1.32076923	11.79077530	0.575488
27	-0.04000330	8.93214990	-0.35731547		27.00000000	1.27185185	11.36037139	0.596973
28	-0.02986763	8.93686960	-0.26692307		28.00000000	1.22642857	10.96043222	0.618374
29	-0.02004976	8.92862320	-0.17901672		29.00000000	1.18413793	10.57272140	0.639733
30	-0.00993343	8.93080810	-0.08871357		30.00000000	1.14466667	10.22279834	0.661155
31	-0.00062912	8.94590280	-0.00562806		31.00000000	1.10774194	9.90975168	0.682754
32	0.00949295	8.92963500	0.08476858		32.00000000	1.07312500	9.58261456	0.704131
33	0.01931351	8.92878060	0.17244613		33.00000000	1.04060606	9.29134321	0.725523
34	0.02947942	8.93470670	0.26338995		34.00000000	1.01000000	9.02405377	0.746878
35	0.03927244	8.93835830	0.35103116		35.00000000	0.98114286	8.76980640	0.768355
36	0.04939146	8.93036270	0.44108365		36.00000000	0.95388889	8.51857375	0.789750
37	0.05924179	8.92512700	0.52874054		37.00000000	0.92810811	8.28348273	0.811136
38	0.06940769	8.94621370	0.62093606		38.00000000	0.90368421	8.08455206	0.832537
39	0.07950736	8.93555930	0.71044271		39.00000000	0.88051282	7.86787452	0.854011
40	0.08933686	8.92798230	0.79759788		40.00000000	0.85850000	7.66467280	0.875389
41	0.09949308	8.93175890	0.88864819		41.00000000	0.83756098	7.48089270	0.896779
42	0.10930993	8.92807290	0.97592702		42.00000000	0.81761905	7.29976246	0.918150
43	0.11947062	8.92937950	1.06679851		43.00000000	0.79860465	7.13104400	0.939638
44	0.12930681	8.93201260	1.15497006		44.00000000	0.78045455	6.97102983	0.961022
45	0.13946155	8.93026920	1.24542918		45.00000000	0.76311111	6.81478765	0.982387
46	0.14928435	8.92586140	1.33249142		46.00000000	0.74652174	6.66334958	1.003760
47	0.15940262	8.93705460	1.42458992		47.00000000	0.73063830	6.52975436	1.025247
48	0.16955587	8.93344970	1.51471884		48.00000000	0.71541667	6.39113881	1.046616
49	0.17939951	8.92932800	1.60191707		49.00000000	0.70081633	6.25781885	1.067994
50	0.18951704	8.93727680	1.69376624		50.00000000	0.68680000	6.13812171	1.089351
51	0.19932792	8.92890740	1.77978054		51.00000000	0.67333333	6.01213098	1.110827
52	0.20947447	8.93401720	1.87144852		52.00000000	0.66038462	5.89988751	1.132198
53	0.21928610	8.93596170	1.95953219		53.00000000	0.64792453	5.78982877	1.153584
54	0.22943860	8.93035600	2.04896838		54.00000000	0.63592593	5.67904491	1.175057
55	0.23925917	8.94299410	2.13969335		55.00000000	0.62436364	5.58368032	1.196428
56	0.24939902	8.93610860	2.22865673		56.00000000	0.61321429	5.47974945	1.217787
57	0.25955003	8.93468000	2.31899646		57.00000000	0.60245614	5.38275283	1.239160
58	0.26938847	8.93501190	2.40698919		58.00000000	0.59206897	5.29014325	1.260642
59	0.27952459	8.94043250	2.49907073		59.00000000	0.58203390	5.20363478	1.282031
60	0.28934890	8.93385220	2.58500031		60.00000000	0.57233333	5.11314141	1.303377
61	0.29945600	8.93283080	2.67498978		61.00000000	0.56295082	5.02874442	1.324763
62	0.30930260	8.92150690	2.75944528		62.00000000	0.55387097	4.94136366	1.346244
63	0.31945512	8.93648240	2.85480506		63.00000000	0.54507937	4.87109215	1.367628
64	0.32926601	8.93473340	2.94190402		64.00000000	0.53656250	4.79404289	1.388989
65	0.33941850	8.92763900	3.03020584		65.00000000	0.52830769	4.71654036	1.410380
66	0.34923536	8.93284030	3.11966370		66.00000000	0.52030303	4.64778388	1.431861
67	0.35936776	8.93573760	3.21121601		67.00000000	0.51253731	4.57989894	1.453247
68	0.36952251	8.93224620	3.30066604		68.00000000	0.50500000	4.51078433	1.474597
69	0.37937731	8.92136000	3.38456156		69.00000000	0.49768116	4.43999279	1.495975
70	0.38949409	8.93283750	3.47928741		70.00000000	0.49057143	4.38219485	1.517497
71	0.39932880	8.92879680	3.56552571		71.00000000	0.48366197	4.31851947	1.538871
72	0.40945077	8.92689610	3.65512448		72.00000000	0.47694444	4.25763350	1.560227
73	0.41929591	8.91552450	3.73824296		73.00000000	0.47041096	4.19396043	1.581615
74	0.42944470	8.93418220	3.83673719		74.00000000	0.46405405	4.14594347	1.603091
75	0.43928310	8.91878220	3.91787029		75.00000000	0.45786667	4.08361308	1.624496
76	0.44939616	8.93114660	4.01362299		76.00000000	0.45184211	4.03546808	1.645858
77	0.45955464	8.90486340	4.09227129		77.00000000	0.44597403	3.97133778	1.667221
78	0.46942359	8.91367150	4.18428768		78.00000000	0.44025641	3.92430102	1.688699
79	0.47955823	8.88373370	4.26026761		79.00000000	0.43468354	3.86161285	1.710076
80	0.48938847	8.88227650	4.34688371		80.00000000	0.42925000	3.81271719	1.731455
81	0.49952981	8.86696820	4.42931494		81.00000000	0.42395062	3.75915664	1.752818
82	0.50930870	8.83993530	4.50225596		82.00000000	0.41878049	3.70199242	1.774297
83	0.51948053	8.80917260	4.57619365		83.00000000	0.41373494	3.64466249	1.795672
84	0.52923560	8.75255010	4.63216110		84.00000000	0.40880952	3.57812584	1.817065
85	0.53938740	8.68346790	4.68375317		85.00000000	0.40400000	3.50812103	1.838552
86	0.54956073	8.57217790	4.71093234		86.00000000	0.39930233	3.42289057	1.859944
87	0.55936491	8.42879200	4.71477048		87.00000000	0.39471264	3.32695077	1.881313
88	0.56947052	8.21804620	4.67993504		88.00000000	0.39022727	3.20690576	1.902696
89	0.57927102	7.95032170	4.60539096		89.00000000	0.38584270	3.06757356	1.924168
90	0.58942127	7.54875370	4.44939599		90.00000000	0.38155556	2.88026891	1.945547
91	0.59920162	7.04990150	4.22431240		91.00000000	0.37736264	2.66036942	1.966891
92	0.60932142	6.40056990	3.90000434		92.00000000	0.37326087	2.38908229	1.988367
93	0.61910027	5.57033160	3.44859380		93.00000000	0.36924731	2.05682997	2.009890
94	0.62922454	4.53523640	2.85368204		94.00000000	0.36531915	1.65680870	2.031306
95	0.63932788	3.22613380	2.06255728		95.00000000	0.36147368	1.16616247	2.052690
96	0.64913654	1.73618510	1.12702119		96.00000000	0.35770833	0.62104788	2.074069
97	0.65916848	-0.10914413	-0.07194437		97.00000000	0.35402062	-0.03863927	2.095549
98	0.66896302	-2.18560910	-1.46209166		98.00000000	0.35040816	-0.76585527	2.116944
99	0.67898005	-4.71816110	-3.20353726		99.00000000	0.34686869	-1.63658235	2.138295
100	0.68888396	-7.56852820	-5.21383768		100.00000000	0.34340000	-2.59903258	2.159666
101	0.69633478	-9.99518110	-6.95999223		101.00000000	0.34000000	-3.39836157	2.181151
18:48 02/04/2018
Test Lot:	JK-PERC
Recipe:	Recipe_YJX-LID
Cell Name:	1-10-4h
Test Order:	3
Test Condition:	Light
1	-0.29991505	8.93160250	-2.67872201		1.00000000	34.34000000	306.71122985	0.000000
2	-0.29009569	8.93549730	-2.59214925		2.00000000	17.17000000	153.42248864	0.061742
3	-0.27994731	8.93629360	-2.50169135		3.00000000	11.44666667	102.29077407	0.083116
4	-0.27012199	8.94388870	-2.41594101		4.00000000	8.58500000	76.78328449	0.104626
5	-0.25996023	8.93033220	-2.32153121		5.00000000	6.86800000	61.33352155	0.126018
6	-0.24981041	8.93498990	-2.23205349		6.00000000	5.72333333	51.13792553	0.147411
7	-0.23996127	8.92828750	-2.14244321		7.00000000	4.90571429	43.79962754	0.168755
8	-0.22983077	8.93668560	-2.05392533		8.00000000	4.29250000	38.36072294	0.190231
9	-0.22001140	8.92957970	-1.96460933		9.00000000	3.81555556	34.07130743	0.211601
10	-0.20984221	8.94146060	-1.87629585		10.00000000	3.43400000	30.70497570	0.232978
11	-0.20003697	8.94071960	-1.78847446		11.00000000	3.12181818	27.91130101	0.254433
12	-0.18986554	8.92736150	-1.69499831		12.00000000	2.86166667	25.54713283	0.275900
13	-0.18010646	8.93487830	-1.60922930		13.00000000	2.64153846	23.60182468	0.297266
14	-0.16996555	8.93409540	-1.51848844		14.00000000	2.45285714	21.91405972	0.318654
15	-0.16010970	8.92601300	-1.42914126		15.00000000	2.28933333	20.43461909	0.339992
16	-0.14999336	8.93898200	-1.34078795		16.00000000	2.14625000	19.18529012	0.361496
17	-0.13983011	8.92856500	-1.24848223		17.00000000	2.02000000	18.03570130	0.382873
18	-0.13002935	8.94059280	-1.16253947		18.00000000	1.90777778	17.05666426	0.404230
19	-0.11987058	8.93690780	-1.07127232		19.00000000	1.80736842	16.15228494	0.425601
20	-0.11003334	8.93752190	-0.98342539		20.00000000	1.71700000	15.34572510	0.447071
21	-0.09987234	8.93415550	-0.89227498		21.00000000	1.63523810	14.60947142	0.468455
22	-0.09007677	8.94205090	-0.80547110		22.00000000	1.56090909	13.95772854	0.489847
23	-0.07994703	8.91901020	-0.71304839		23.00000000	1.49304348	13.31647001	0.511199
24	-0.07011203	8.94172380	-0.62692238		24.00000000	1.43083333	12.79411647	0.532683
25	-0.05998377	8.94534590	-0.53657558		25.00000000	1.37360000	12.28732713	0.554072
26	-0.04986296	8.92320920	-0.44493761		26.00000000	1.32076923	11.78550015	0.575459
27	-0.04003391	8.93532370	-0.35771592		27.00000000	1.27185185	11.36440799	0.596927
28	-0.02987737	8.93251040	-0.26687988		28.00000000	1.22642857	10.95508597	0.618310
29	-0.02005278	8.91841980	-0.17883912		29.00000000	1.18413793	10.56063917	0.639660
30	-0.00991783	8.94475650	-0.08871255		30.00000000	1.14466667	10.23876461	0.661037
31	-0.00063880	8.92823120	-0.00570338		31.00000000	1.10774194	9.89017611	0.682641
32	0.00950785	8.93811610	0.08498227		32.00000000	1.07312500	9.59171584	0.704016
33	0.01932844	8.92562960	0.17251846		33.00000000	1.04060606	9.28806426	0.725379
34	0.02942738	8.94109150	0.26311286		34.00000000	1.01000000	9.03050242	0.746754
35	0.03926880	8.93163590	0.35073461		35.00000000	0.98114286	8.76321077	0.768230
36	0.04942282	8.92985150	0.44133840		36.00000000	0.95388889	8.51808613	0.789615
37	0.05924266	8.93145370	0.52912306		37.00000000	0.92810811	8.28935460	0.810962
38	0.06940337	8.93418880	0.62006284		38.00000000	0.90368421	8.07368535	0.832340
39	0.07957302	8.93289570	0.71081749		39.00000000	0.88051282	7.86552919	0.853825
40	0.08936904	8.91426280	0.79665914		40.00000000	0.85850000	7.65289461	0.875209
41	0.09955060	8.94625660	0.89060519		41.00000000	0.83756098	7.49303541	0.896552
42	0.10937118	8.92911530	0.97658788		42.00000000	0.81761905	7.30061475	0.917929
43	0.11950956	8.93694590	1.06805047		43.00000000	0.79860465	7.13708656	0.939407
44	0.12934577	8.92495540	1.15440523		44.00000000	0.78045455	6.96552201	0.960772
45	0.13948491	8.93872830	1.24681771		45.00000000	0.76311111	6.82124288	0.982131
46	0.14930549	8.92546940	1.33262158		46.00000000	0.74652174	6.66305694	1.003506
47	0.15944761	8.93187900	1.42416676		47.00000000	0.73063830	6.52597287	1.024983
48	0.16960311	8.92978000	1.51451846		48.00000000	0.71541667	6.38851344	1.046361
49	0.17939764	8.92342660	1.60084167		49.00000000	0.70081633	6.25368305	1.067728
50	0.18954198	8.93836310	1.69419504		50.00000000	0.68680000	6.13886778	1.089092
51	0.19935587	8.94005200	1.78225184		51.00000000	0.67333333	6.01963501	1.110564
52	0.20948756	8.92986010	1.87069460		52.00000000	0.66038462	5.89714223	1.131942
53	0.21933122	8.93443300	1.95960009		53.00000000	0.64792453	5.78883829	1.153335
54	0.22943537	8.93222330	2.04936796		54.00000000	0.63592593	5.68023237	1.174686
55	0.23928051	8.92935280	2.13662009		55.00000000	0.62436364	5.57516318	1.196164
56	0.24943751	8.93765350	2.22938603		56.00000000	0.61321429	5.48069681	1.217550
57	0.25957143	8.92337800	2.31625399		57.00000000	0.60245614	5.37594387	1.238927
58	0.26937416	8.93523030	2.40692016		58.00000000	0.59206897	5.29027256	1.260409
59	0.27952147	8.92654710	2.49516157		59.00000000	0.58203390	5.19555301	1.281795
60	0.28935099	8.93444920	2.58519172		60.00000000	0.57233333	5.11348309	1.303137
61	0.29948416	8.92678070	2.67342942		61.00000000	0.56295082	5.02533851	1.324507
62	0.30932483	8.92494010	2.76070558		62.00000000	0.55387097	4.94326521	1.345982
63	0.31947291	8.92828270	2.85234446		63.00000000	0.54507937	4.86662267	1.367368
64	0.32928976	8.92758370	2.93976189		64.00000000	0.53656250	4.79020663	1.388730
65	0.33943561	8.92442420	3.02926737		65.00000000	0.52830769	4.71484195	1.410099
66	0.34926659	8.93130680	3.11940707		66.00000000	0.52030303	4.64698599	1.431573
67	0.35941243	8.93728450	3.21217114		67.00000000	0.51253731	4.58069179	1.452958
68	0.36958429	8.91532420	3.29496376		68.00000000	0.50500000	4.50223872	1.474320
69	0.37937662	8.93696120	3.39047413		69.00000000	0.49768116	4.44775721	1.495690
70	0.38953954	8.92352290	3.47606501		70.00000000	0.49057143	4.37762538	1.517176
71	0.39935195	8.92808910	3.56544979		71.00000000	0.48366197	4.31817718	1.538562
72	0.40949258	8.91497990	3.65061812		72.00000000	0.47694444	4.25195014	1.559911
73	0.41929084	8.92323300	3.74142986		73.00000000	0.47041096	4.19758659	1.581294
74	0.42946121	8.92269230	3.83195023		74.00000000	0.46405405	4.14061153	1.602771
75	0.43930191	8.91579630	3.91672634		75.00000000	0.45786667	4.08224593	1.624167
76	0.44946709	8.90794090	4.00382627		76.00000000	0.45184211	4.02498277	1.645518
77	0.45960993	8.91785240	4.09873352		77.00000000	0.44597403	3.97713054	1.666890
78	0.46944839	8.89997010	4.17807663		78.00000000	0.44025641	3.91826889	1.688366
79	0.47959271	8.91021540	4.27327435		79.00000000	0.43468354	3.87312401	1.709737
80	0.48942521	8.88480470	4.34844741		80.00000000	0.42925000	3.81380242	1.731094
81	0.49953309	8.86861520	4.43016675		81.00000000	0.42395062	3.75985489	1.752463
82	0.50937748	8.83982370	4.50280712		82.00000000	0.41878049	3.70194568	1.773934
83	0.51951587	8.80402760	4.57383206		83.00000000	0.41373494	3.64253383	1.795304
84	0.52929032	8.75982380	4.63648994		84.00000000	0.40880952	3.58109940	1.816691
85	0.53941160	8.67451000	4.67913132		85.00000000	0.40400000	3.50450204	1.838029
86	0.54953134	8.58064370	4.71533263		86.00000000	0.39930233	3.42627098	1.859500
87	0.55937499	8.42716410	4.71394483		87.00000000	0.39471264	3.32630822	1.880898
88	0.56949627	8.22802730	4.68583086		88.00000000	0.39022727	3.21080065	1.902285
89	0.57931536	7.94151120	4.60063942		89.00000000	0.38584270	3.06417410	1.923830
90	0.58942103	7.55221940	4.45143694		90.00000000	0.38155556	2.88159127	1.945196
91	0.59921259	7.04694370	4.22261739		91.00000000	0.37736264	2.65925326	1.966551
92	0.60931373	6.40886120	3.90500712		92.00000000	0.37326087	2.39217710	1.988029
93	0.61912841	5.57136630	3.44939116		93.00000000	0.36924731	2.05721203	2.009528
94	0.62923032	4.53583860	2.85408717		94.00000000	0.36531915	1.65702870	2.030960
95	0.63937241	3.23141000	2.06607440		95.00000000	0.36147368	1.16806968	2.052338
96	0.64917064	1.72360790	1.11891564		96.00000000	0.35770833	0.61654891	2.073719
97	0.65917283	-0.11183030	-0.07371550		97.00000000	0.35402062	-0.03959023	2.095217
98	0.66896516	-2.21843080	-1.48405292		98.00000000	0.35040816	-0.77735626	2.116615
99	0.67903429	-4.74654820	-3.22306899		99.00000000	0.34686869	-1.64642894	2.137966
100	0.68892711	-7.62819480	-5.25527020		100.00000000	0.34340000	-2.61952209	2.159335
101	0.69612116	-9.99549390	-6.95807481		101.00000000	0.34000000	-3.39846793	2.180821
18:48 02/04/2018
Test Lot:	JK-PERC
Recipe:	Recipe_YJX-LID
Cell Name:	1-10-4h
Test Order:	4
Test Condition:	Light
1	-0.29994676	8.93778040	-2.68085827		1.00000000	34.34000000	306.92337894	0.000000
2	-0.29009002	8.93380170	-2.59160671		2.00000000	17.17000000	153.39337519	0.061725
3	-0.27995268	8.93533420	-2.50147076		3.00000000	11.44666667	102.27979214	0.083234
4	-0.27017778	8.94149020	-2.41579197		4.00000000	8.58500000	76.76269337	0.104661
5	-0.26000991	8.92712970	-2.32114219		5.00000000	6.86800000	61.31152678	0.126031
6	-0.24983907	8.94637010	-2.23515279		6.00000000	5.72333333	51.20305821	0.147421
7	-0.23999646	8.94310570	-2.14631371		7.00000000	4.90571429	43.87232139	0.168911
8	-0.22986208	8.93832110	-2.05458108		8.00000000	4.29250000	38.36774332	0.190278
9	-0.22003213	8.94011690	-1.96711296		9.00000000	3.81555556	34.11151271	0.211631
10	-0.20987915	8.92986870	-1.87419325		10.00000000	3.43400000	30.66516912	0.233012
11	-0.20008492	8.93280220	-1.78731901		11.00000000	3.12181818	27.88658432	0.254484
12	-0.18991630	8.93628980	-1.69714709		12.00000000	2.86166667	25.57268264	0.275871
13	-0.18013473	8.93521690	-1.60954288		13.00000000	2.64153846	23.60271910	0.297212
14	-0.16998398	8.92686750	-1.51742447		14.00000000	2.45285714	21.89633071	0.318582
15	-0.16017486	8.93886380	-1.43178126		15.00000000	2.28933333	20.46403886	0.340102
16	-0.15005983	8.92208290	-1.33884624		16.00000000	2.14625000	19.14902042	0.361474
17	-0.13988528	8.92815110	-1.24891692		17.00000000	2.02000000	18.03486522	0.382830
18	-0.13005978	8.94184590	-1.16297451		18.00000000	1.90777778	17.05905490	0.404197
19	-0.11992243	8.92834280	-1.07070856		19.00000000	1.80736842	16.13680483	0.425678
20	-0.11007908	8.94739820	-0.98492136		20.00000000	1.71700000	15.36268271	0.447067
21	-0.09991344	8.93052770	-0.89227975		21.00000000	1.63523810	14.60353911	0.468445
22	-0.09008274	8.94200420	-0.80552026		22.00000000	1.56090909	13.95765565	0.489790
23	-0.07993795	8.93708420	-0.71441219		23.00000000	1.49304348	13.34345528	0.511251
24	-0.07014298	8.92833810	-0.62626021		24.00000000	1.43083333	12.77496376	0.532618
25	-0.05998776	8.93641000	-0.53607519		25.00000000	1.37360000	12.27505278	0.553995
26	-0.04988688	8.93452930	-0.44571578		26.00000000	1.32076923	11.80045139	0.575401
27	-0.04003906	8.93488500	-0.35774439		27.00000000	1.27185185	11.36385003	0.596874
28	-0.02986300	8.93082620	-0.26670130		28.00000000	1.22642857	10.95302042	0.618245
29	-0.02004124	8.93663220	-0.17910115		29.00000000	1.18413793	10.58220516	0.639639
30	-0.00990686	8.93304440	-0.08849842		30.00000000	1.14466667	10.22535816	0.661120
31	-0.00063885	8.93394570	-0.00570745		31.00000000	1.10774194	9.89650630	0.682670
32	0.00947597	8.93031690	0.08462338		32.00000000	1.07312500	9.58334632	0.704033
33	0.01931011	8.94700240	0.17276757		33.00000000	1.04060606	9.31030492	0.725404
34	0.02946429	8.92942620	0.26309920		34.00000000	1.01000000	9.01872046	0.746885
35	0.03927461	8.93806930	0.35103922		35.00000000	0.98114286	8.76952285	0.768256
36	0.04941763	8.92302610	0.44095480		36.00000000	0.95388889	8.51157545	0.789599
37	0.05922572	8.93721100	0.52931278		37.00000000	0.92810811	8.29469799	0.810981
38	0.06938735	8.93994520	0.62031908		38.00000000	0.90368421	8.07888732	0.832460
39	0.07954748	8.92013740	0.70957445		39.00000000	0.88051282	7.85429534	0.853837
40	0.08933548	8.94003490	0.79866230		40.00000000	0.85850000	7.67501996	0.875189
41	0.09947701	8.93743320	0.88906911		41.00000000	0.83756098	7.48564527	0.896567
42	0.10928956	8.93017580	0.97597498		42.00000000	0.81761905	7.30148183	0.918048
43	0.11945565	8.93875030	1.06778423		43.00000000	0.79860465	7.13852757	0.939437
44	0.12929054	8.92325120	1.15369197		44.00000000	0.78045455	6.96419196	0.960785
45	0.13942909	8.94163230	1.24672365		45.00000000	0.76311111	6.82345896	0.982147
46	0.14922974	8.93035220	1.33267414		46.00000000	0.74652174	6.66670206	1.003615
47	0.15942188	8.92444610	1.42275198		47.00000000	0.73063830	6.52054211	1.024992
48	0.16955151	8.93799590	1.51545070		48.00000000	0.71541667	6.39439123	1.046352
49	0.17935662	8.91703130	1.59932859		49.00000000	0.70081633	6.24920112	1.067728
50	0.18951601	8.94611170	1.69543139		50.00000000	0.68680000	6.14418952	1.089222
51	0.19927646	8.92937280	1.77941380		51.00000000	0.67333333	6.01244435	1.110614
52	0.20945521	8.94093130	1.87272464		52.00000000	0.66038462	5.90445348	1.132003
53	0.21926925	8.93379880	1.95890736		53.00000000	0.64792453	5.78842737	1.153356
54	0.22943683	8.92589660	2.04792942		54.00000000	0.63592593	5.67620906	1.174829
55	0.23923153	8.94214440	2.13924289		55.00000000	0.62436364	5.58314979	1.196223
56	0.24940133	8.94548420	2.23101566		56.00000000	0.61321429	5.48549870	1.217602
57	0.25955999	8.91754720	2.31463846		57.00000000	0.60245614	5.37243107	1.238960
58	0.26938146	8.93843940	2.40784986		58.00000000	0.59206897	5.29217257	1.260439
59	0.27951705	8.92139050	2.49368075		59.00000000	0.58203390	5.19255169	1.281870
60	0.28935716	8.93905540	2.58657968		60.00000000	0.57233333	5.11611937	1.303255
61	0.29946965	8.92742540	2.67349296		61.00000000	0.56295082	5.02570145	1.324741
62	0.30931348	8.93437770	2.76352346		62.00000000	0.55387097	4.94849242	1.346141
63	0.31943488	8.92639730	2.85140265		63.00000000	0.54507937	4.86559497	1.367489
64	0.32925639	8.92369370	2.93818317		64.00000000	0.53656250	4.78811940	1.388863
65	0.33942470	8.94247630	3.03529734		65.00000000	0.52830769	4.72437902	1.410338
66	0.34925511	8.92762180	3.11801753		66.00000000	0.52030303	4.64506868	1.431714
67	0.35938251	8.92079830	3.20597888		67.00000000	0.51253731	4.57224199	1.453057
68	0.36955604	8.93680380	3.30264982		68.00000000	0.50500000	4.51308592	1.474440
69	0.37935743	8.92535400	3.38589936		69.00000000	0.49768116	4.44198053	1.495923
70	0.38950714	8.93279740	3.47938837		70.00000000	0.49057143	4.38217518	1.517297
71	0.39932716	8.92740540	3.56495544		71.00000000	0.48366197	4.31784650	1.538658
72	0.40946570	8.93442630	3.65834112		72.00000000	0.47694444	4.26122499	1.560041
73	0.41929018	8.91784760	3.73916593		73.00000000	0.47041096	4.19505324	1.581513
74	0.42944807	8.92322160	3.83206029		74.00000000	0.46405405	4.14085716	1.602898
75	0.43927032	8.92170240	3.91903907		75.00000000	0.45786667	4.08495014	1.624243
76	0.44943565	8.91662790	4.00745046		76.00000000	0.45184211	4.02890792	1.645625
77	0.45957494	8.91418740	4.09673714		77.00000000	0.44597403	3.97549604	1.667100
78	0.46940759	8.89892290	4.17722195		78.00000000	0.44025641	3.91780785	1.688477
79	0.47955731	8.90066810	4.26838045		79.00000000	0.43468354	3.86897396	1.709832
80	0.48937434	8.88134100	4.34630039		80.00000000	0.42925000	3.81231562	1.731207
81	0.49950472	8.86734290	4.42927963		81.00000000	0.42395062	3.75931550	1.752689
82	0.50930458	8.84259990	4.50357663		82.00000000	0.41878049	3.70310830	1.774069
83	0.51944691	8.80531790	4.57389517		83.00000000	0.41373494	3.64306767	1.795430
84	0.52922821	8.75287340	4.63226752		84.00000000	0.40880952	3.57825801	1.816800
85	0.53938013	8.68720720	4.68570695		85.00000000	0.40400000	3.50963171	1.838272
86	0.54949933	8.56782820	4.70801586		86.00000000	0.39930233	3.42115373	1.859648
87	0.55934167	8.42876240	4.71455804		87.00000000	0.39471264	3.32693909	1.881025
88	0.56947875	8.21202370	4.67657299		88.00000000	0.39022727	3.20455561	1.902385
89	0.57927787	7.94917820	4.60478302		89.00000000	0.38584270	3.06713235	1.923856
90	0.58940154	7.55514720	4.45301539		90.00000000	0.38155556	2.88270839	1.945242
91	0.59919846	7.06170080	4.23136024		91.00000000	0.37736264	2.66482204	1.966621
92	0.60929906	6.39314940	3.89533992		92.00000000	0.37326087	2.38631250	1.988176
93	0.61911386	5.58252050	3.45621582		93.00000000	0.36924731	2.06133069	2.009567
94	0.62923902	4.50820210	2.83673667		94.00000000	0.36531915	1.64693255	2.030921
95	0.63934559	3.24352380	2.07373264		95.00000000	0.36147368	1.17244850	2.052294
96	0.64914471	1.72392000	1.11907355		96.00000000	0.35770833	0.61666055	2.073798
97	0.65918726	-0.12751636	-0.08405716		97.00000000	0.35402062	-0.04514342	2.095231
98	0.66898865	-2.23461010	-1.49492879		98.00000000	0.35040816	-0.78302562	2.116596
99	0.67898655	-4.77434210	-3.24171407		99.00000000	0.34686869	-1.65606977	2.137988
100	0.68890625	-7.66722730	-5.28200081		100.00000000	0.34340000	-2.63292585	2.159467
101	0.69596499	-9.99583050	-6.95674807		101.00000000	0.34000000	-3.39858237	2.180832
19:51 02/04/2018
Test Lot:	JK-PERC
Recipe:	Recipe_YJX-LID
Cell Name:	1-10-4h
Test Order:	2
Test Condition:	Light
1	-0.29982892	8.95765400	-2.68576372		1.00000000	34.34000000	307.60583836	0.000000
2	-0.29000947	8.94764900	-2.59490294		2.00000000	17.17000000	153.63113333	0.061728
3	-0.27990127	8.95584960	-2.50675368		3.00000000	11.44666667	102.51462509	0.083240
4	-0.27007142	8.94053650	-2.41458339		4.00000000	8.58500000	76.75450585	0.104648
5	-0.25990587	8.94645600	-2.32523643		5.00000000	6.86800000	61.44425981	0.126002
6	-0.24971804	8.93676280	-2.23167089		6.00000000	5.72333333	51.14807243	0.147362
7	-0.23989265	8.93600560	-2.14368206		7.00000000	4.90571429	43.83749033	0.168887
8	-0.22974797	8.94948010	-2.05612489		8.00000000	4.29250000	38.41564333	0.190261
9	-0.21997245	8.93494220	-1.96544113		9.00000000	3.81555556	34.09176835	0.211631
10	-0.20979872	8.94271280	-1.87616970		10.00000000	3.43400000	30.70927576	0.233010
11	-0.19994804	8.93894960	-1.78732545		11.00000000	3.12181818	27.90577539	0.254493
12	-0.18982866	8.94476510	-1.69797277		12.00000000	2.86166667	25.59693613	0.275888
13	-0.18006431	8.93598750	-1.60905242		13.00000000	2.64153846	23.60475467	0.297232
14	-0.16987497	8.94382570	-1.51933212		14.00000000	2.45285714	21.93792675	0.318601
15	-0.16007414	8.93880270	-1.43087115		15.00000000	2.28933333	20.46389898	0.340074
16	-0.14991456	8.93750100	-1.33986153		16.00000000	2.14625000	19.18211152	0.361456
17	-0.13977881	8.95623490	-1.25189186		17.00000000	2.02000000	18.09159450	0.382815
18	-0.12998395	8.93464570	-1.16136054		18.00000000	1.90777778	17.04531852	0.404192
19	-0.11981767	8.94838520	-1.07217466		19.00000000	1.80736842	16.17302883	0.425674
20	-0.10999303	8.93875600	-0.98320086		20.00000000	1.71700000	15.34784405	0.447096
21	-0.09983718	8.93425460	-0.89197076		21.00000000	1.63523810	14.60963347	0.468484
22	-0.09003487	8.94169810	-0.80506458		22.00000000	1.56090909	13.95717785	0.489839
23	-0.07993633	8.93843360	-0.71450554		23.00000000	1.49304348	13.34546999	0.511317
24	-0.07006182	8.94048310	-0.62638650		24.00000000	1.43083333	12.79234124	0.532685
25	-0.05992532	8.93152430	-0.53522443		25.00000000	1.37360000	12.26834178	0.554060
26	-0.04977096	8.93980880	-0.44494282		26.00000000	1.32076923	11.80742439	0.575533
27	-0.03993664	8.93752100	-0.35693455		27.00000000	1.27185185	11.36720263	0.596981
28	-0.02981354	8.94626240	-0.26671973		28.00000000	1.22642857	10.97195181	0.618363
29	-0.01997252	8.94508270	-0.17865586		29.00000000	1.18413793	10.59221172	0.639752
30	-0.00983156	8.93442150	-0.08783928		30.00000000	1.14466667	10.22693448	0.661118
31	-0.00063138	8.93773750	-0.00564307		31.00000000	1.10774194	9.90070664	0.682720
32	0.00951310	8.94230560	0.08506906		32.00000000	1.07312500	9.59621170	0.704115
33	0.01929132	8.93475060	0.17236312		33.00000000	1.04060606	9.29755562	0.725504
34	0.02944986	8.94409470	0.26340230		34.00000000	1.01000000	9.03353565	0.746836
35	0.03927868	8.94785120	0.35145980		35.00000000	0.98114286	8.77912029	0.768315
36	0.04945285	8.94134240	0.44217488		36.00000000	0.95388889	8.52904717	0.789687
37	0.05927870	8.94289970	0.53012348		37.00000000	0.92810811	8.29997772	0.811079
38	0.06944096	8.92903140	0.62004052		38.00000000	0.90368421	8.06902469	0.832459
39	0.07956526	8.95138360	0.71221920		39.00000000	0.88051282	7.88180802	0.853943
40	0.08936878	8.94920640	0.79977968		40.00000000	0.85850000	7.68289369	0.875319
41	0.09951691	8.94492050	0.89017081		41.00000000	0.83756098	7.49191634	0.896693
42	0.10936434	8.93905640	0.97761400		42.00000000	0.81761905	7.30874278	0.918176
43	0.11953329	8.94558620	1.06929535		43.00000000	0.79860465	7.14398675	0.939560
44	0.12934053	8.94356060	1.15676487		44.00000000	0.78045455	6.98004252	0.960905
45	0.13950130	8.94599340	1.24797771		45.00000000	0.76311111	6.82678696	0.982285
46	0.14929739	8.94530300	1.33551039		46.00000000	0.74652174	6.67786315	1.003764
47	0.15945816	8.93023300	1.42399852		47.00000000	0.73063830	6.52477024	1.025140
48	0.16962786	8.95181750	1.51847765		48.00000000	0.71541667	6.40427944	1.046479
49	0.17943510	8.94265080	1.60462544		49.00000000	0.70081633	6.26715568	1.067864
50	0.18954080	8.94980530	1.69635326		50.00000000	0.68680000	6.14672628	1.089339
51	0.19933167	8.92925830	1.77988397		51.00000000	0.67333333	6.01236726	1.110728
52	0.20949988	8.94023800	1.87297879		52.00000000	0.66038462	5.90399563	1.132083
53	0.21933019	8.93480400	1.95967226		53.00000000	0.64792453	5.78907867	1.153448
54	0.22944260	8.93638900	2.05038833		54.00000000	0.63592593	5.68288145	1.174926
55	0.23926397	8.93836020	2.13862755		55.00000000	0.62436364	5.58078708	1.196297
56	0.24942103	8.94023130	2.22988170		56.00000000	0.61321429	5.48227755	1.217640
57	0.25954682	8.93846230	2.31994947		57.00000000	0.60245614	5.38503150	1.239025
58	0.26933172	8.94723700	2.40977473		58.00000000	0.59206897	5.29738135	1.260507
59	0.27952600	8.93460560	2.49745456		59.00000000	0.58203390	5.20024333	1.281880
60	0.28932431	8.94800470	2.58887529		60.00000000	0.57233333	5.12124136	1.303248
61	0.29948062	8.92184160	2.67191865		61.00000000	0.56295082	5.02255804	1.324619
62	0.30931091	8.94732670	2.76750576		62.00000000	0.55387097	4.95566450	1.346092
63	0.31945533	8.93729020	2.85506499		63.00000000	0.54507937	4.87153247	1.367483
64	0.32925513	8.93491270	2.94186584		64.00000000	0.53656250	4.79413910	1.388874
65	0.33943152	8.92475220	3.02934220		65.00000000	0.52830769	4.71501524	1.410249
66	0.34926480	8.94907280	3.12559612		66.00000000	0.52030303	4.65622970	1.431725
67	0.35938093	8.93009760	3.20930678		67.00000000	0.51253731	4.57700823	1.453104
68	0.36956030	8.93003460	3.30018627		68.00000000	0.50500000	4.50966747	1.474497
69	0.37935862	8.93610380	3.38998801		69.00000000	0.49768116	4.44733050	1.495842
70	0.38954321	8.93452170	3.48038226		70.00000000	0.49057143	4.38302107	1.517317
71	0.39937502	8.92908290	3.56605266		71.00000000	0.48366197	4.31865784	1.538713
72	0.40951866	8.93384270	3.65857529		72.00000000	0.47694444	4.26094664	1.560100
73	0.41933483	8.92521950	3.74265540		73.00000000	0.47041096	4.19852106	1.581584
74	0.42949262	8.93244740	3.83642024		74.00000000	0.46405405	4.14513843	1.603020
75	0.43930805	8.92262940	3.91978292		75.00000000	0.45786667	4.08537458	1.624368
76	0.44944352	8.92549320	4.01150508		76.00000000	0.45184211	4.03291364	1.645741
77	0.45959017	8.91433720	4.09694175		77.00000000	0.44597403	3.97556285	1.667225
78	0.46945620	8.90270520	4.17943015		78.00000000	0.44025641	3.91947303	1.688598
79	0.47956264	8.90238480	4.26925116		79.00000000	0.43468354	3.86972018	1.709954
80	0.48941007	8.89297100	4.35230956		80.00000000	0.42925000	3.81730780	1.731320
81	0.49951875	8.87934490	4.43539927		81.00000000	0.42395062	3.76440375	1.752803
82	0.50936544	8.85244940	4.50913178		82.00000000	0.41878049	3.70723308	1.774188
83	0.51951504	8.79012490	4.56660209		83.00000000	0.41373494	3.63678180	1.795531
84	0.52929920	8.77018360	4.64205116		84.00000000	0.40880952	3.58533458	1.816909
85	0.53940862	8.68232920	4.68332321		85.00000000	0.40400000	3.50766100	1.838379
86	0.54955226	8.57811640	4.71412325		86.00000000	0.39930233	3.42526183	1.859763
87	0.55937439	8.42893600	4.71493093		87.00000000	0.39471264	3.32700761	1.881116
88	0.56950092	8.21557620	4.67877820		88.00000000	0.39022727	3.20594189	1.902493
89	0.57927918	7.94444420	4.60205112		89.00000000	0.38584270	3.06530577	1.923982
90	0.58940721	7.54152870	4.44503139		90.00000000	0.38155556	2.87751217	1.945352
91	0.59921068	7.04658940	4.22239163		91.00000000	0.37736264	2.65911956	1.966710
92	0.60932386	6.36637500	3.87918419		92.00000000	0.37326087	2.37631867	1.988189
93	0.61913180	5.56063800	3.44276781		93.00000000	0.36924731	2.05325063	2.009697
94	0.62923974	4.48636290	2.82299782		94.00000000	0.36531915	1.63895428	2.031083
95	0.63935143	3.19027500	2.03970688		95.00000000	0.36147368	1.15320046	2.052447
96	0.64913112	1.66450250	1.08048037		96.00000000	0.35770833	0.59540642	2.073815
97	0.65918845	-0.17675096	-0.11651219		97.00000000	0.35402062	-0.06257348	2.095288
98	0.66897035	-2.30331490	-1.54084937		98.00000000	0.35040816	-0.80710034	2.116674
99	0.67902172	-4.83394960	-3.28235677		99.00000000	0.34686869	-1.67674575	2.138069
100	0.68892127	-7.72115800	-5.31926998		100.00000000	0.34340000	-2.65144566	2.159422
101	0.69584966	-9.99632840	-6.95594172		101.00000000	0.34000000	-3.39875166	2.180926
19:51 02/04/2018
Test Lot:	JK-PERC
Recipe:	Recipe_YJX-LID
Cell Name:	1-10-4h
Test Order:	3
Test Condition:	Light
1	-0.29982907	8.93313690	-2.67841413		1.00000000	34.34000000	306.76392115	0.000000
2	-0.29002675	8.94295020	-2.59369478		2.00000000	17.17000000	153.55045493	0.061781
3	-0.27986941	8.94551850	-2.50357698		3.00000000	11.44666667	102.39636843	0.083206
4	-0.27002469	8.93911840	-2.41378267		4.00000000	8.58500000	76.74233146	0.104699
5	-0.25986287	8.94855400	-2.32539692		5.00000000	6.86800000	61.45866887	0.126137
6	-0.24970180	8.94022460	-2.23239018		6.00000000	5.72333333	51.16788546	0.147513
7	-0.23990543	8.94514940	-2.14598991		7.00000000	4.90571429	43.88234720	0.168892
8	-0.22974288	8.93617440	-2.05302244		8.00000000	4.29250000	38.35852861	0.190381
9	-0.21993089	8.93893620	-1.96594819		9.00000000	3.81555556	34.10700768	0.211768
10	-0.20977801	8.94101910	-1.87562919		10.00000000	3.43400000	30.70345959	0.233144
11	-0.19996676	8.94531630	-1.78876592		11.00000000	3.12181818	27.92565107	0.254510
12	-0.18980272	8.94241620	-1.69729492		12.00000000	2.86166667	25.59021436	0.275994
13	-0.18002348	8.93647670	-1.60877563		13.00000000	2.64153846	23.60604691	0.297372
14	-0.16987655	8.94160180	-1.51896847		14.00000000	2.45285714	21.93247184	0.318759
15	-0.16005562	8.94450190	-1.43161780		15.00000000	2.28933333	20.47694635	0.340099
16	-0.14989157	8.92981430	-1.33850389		16.00000000	2.14625000	19.16561394	0.361577
17	-0.13974912	8.93807890	-1.24908866		17.00000000	2.02000000	18.05491938	0.382970
18	-0.12996019	8.93135640	-1.16072077		18.00000000	1.90777778	17.03904327	0.404355
19	-0.11981700	8.94180200	-1.07137989		19.00000000	1.80736842	16.16113056	0.425820
20	-0.10998341	8.94476220	-0.98377545		20.00000000	1.71700000	15.35815670	0.447273
21	-0.09984840	8.92996310	-0.89164250		21.00000000	1.63523810	14.60261585	0.468649
22	-0.09000962	8.94494720	-0.80513125		22.00000000	1.56090909	13.96224940	0.490028
23	-0.07989544	8.93084050	-0.71353340		23.00000000	1.49304348	13.33413316	0.511389
24	-0.07004846	8.94121270	-0.62631817		24.00000000	1.43083333	12.79338517	0.532879
25	-0.05991047	8.94618230	-0.53596994		25.00000000	1.37360000	12.28847601	0.554239
26	-0.04975908	8.94492440	-0.44509116		26.00000000	1.32076923	11.81418092	0.575646
27	-0.03992401	8.94005300	-0.35692277		27.00000000	1.27185185	11.37042296	0.597006
28	-0.02980983	8.94313340	-0.26659332		28.00000000	1.22642857	10.96811432	0.618482
29	-0.01995318	8.92642310	-0.17811054		29.00000000	1.18413793	10.57011618	0.639862
30	-0.00982859	8.94389440	-0.08790585		30.00000000	1.14466667	10.23777779	0.661242
31	-0.00062393	8.93140980	-0.00557262		31.00000000	1.10774194	9.89369718	0.682734
32	0.00953395	8.93101790	0.08514784		32.00000000	1.07312500	9.58409858	0.704213
33	0.01934640	8.96295930	0.17340102		33.00000000	1.04060606	9.32690977	0.725587
34	0.02950644	8.92953110	0.26347864		34.00000000	1.01000000	9.01882641	0.746973
35	0.03932931	8.94153500	0.35166443		35.00000000	0.98114286	8.77292320	0.768454
36	0.04948935	8.94198230	0.44253285		36.00000000	0.95388889	8.52965756	0.789829
37	0.05930181	8.94908620	0.53069696		37.00000000	0.92810811	8.30571946	0.811219
38	0.06941643	8.93518160	0.62024844		38.00000000	0.90368421	8.07458253	0.832599
39	0.07956679	8.95024300	0.71214212		39.00000000	0.88051282	7.88080371	0.854071
40	0.08943284	8.93665030	0.79922998		40.00000000	0.85850000	7.67211428	0.875468
41	0.09955491	8.93605420	0.88962808		41.00000000	0.83756098	7.48449027	0.896809
42	0.10937332	8.95168500	0.97907551		42.00000000	0.81761905	7.31906816	0.918183
43	0.11951327	8.92988110	1.06723929		43.00000000	0.79860465	7.13144458	0.939661
44	0.12931605	8.94199560	1.15634355		44.00000000	0.78045455	6.97882111	0.961034
45	0.13950808	8.93939210	1.24711743		45.00000000	0.76311111	6.82174944	0.982390
46	0.14929673	8.93779660	1.33438381		46.00000000	0.74652174	6.67225946	1.003763
47	0.15946196	8.94512080	1.42640650		47.00000000	0.73063830	6.53564784	1.025243
48	0.16960861	8.93332390	1.51516865		48.00000000	0.71541667	6.39104881	1.046631
49	0.17943743	8.93811040	1.60383156		49.00000000	0.70081633	6.26397370	1.067979
50	0.18957588	8.93329050	1.69353641		50.00000000	0.68680000	6.13538392	1.089351
51	0.19937420	8.93405530	1.78122013		51.00000000	0.67333333	6.01559724	1.110825
52	0.20949776	8.94683650	1.87434221		52.00000000	0.66038462	5.90835318	1.132202
53	0.21932882	8.92586420	1.95769926		53.00000000	0.64792453	5.78328635	1.153549
54	0.22944272	8.94886780	2.05325257		54.00000000	0.63592593	5.69081704	1.174936
55	0.23927230	8.93285180	2.13738400		55.00000000	0.62436364	5.57734783	1.196416
56	0.24940181	8.94487090	2.23086699		56.00000000	0.61321429	5.48512262	1.217799
57	0.25955364	8.94610880	2.32199510		57.00000000	0.60245614	5.38963818	1.239161
58	0.26937726	8.93049530	2.40567235		58.00000000	0.59206897	5.28746911	1.260531
59	0.27956635	8.95345400	2.50308445		59.00000000	0.58203390	5.21121373	1.282000
60	0.28934827	8.92798900	2.58329817		60.00000000	0.57233333	5.10978570	1.303385
61	0.29948673	8.94875240	2.68003259		61.00000000	0.56295082	5.03770750	1.324757
62	0.30934682	8.94866940	2.76824242		62.00000000	0.55387097	4.95640818	1.346125
63	0.31948826	8.92979430	2.85296444		63.00000000	0.54507937	4.86744661	1.367600
64	0.32930294	8.94852730	2.94677635		64.00000000	0.53656250	4.80144418	1.388977
65	0.33942872	8.92844580	3.03057093		65.00000000	0.52830769	4.71696660	1.410368
66	0.34924120	8.92895510	3.11835899		66.00000000	0.52030303	4.64576240	1.431840
67	0.35942653	8.92808060	3.20898903		67.00000000	0.51253731	4.57597444	1.453214
68	0.36958060	8.93178560	3.30101468		68.00000000	0.50500000	4.51055173	1.474581
69	0.37939531	8.93908020	3.39144510		69.00000000	0.49768116	4.44881180	1.495952
70	0.38954192	8.93781850	3.48165498		70.00000000	0.49057143	4.38463839	1.517422
71	0.39938045	8.93129630	3.56698514		71.00000000	0.48366197	4.31972838	1.538813
72	0.40952337	8.92326930	3.65428732		72.00000000	0.47694444	4.25590372	1.560179
73	0.41934994	8.93110470	3.74525822		73.00000000	0.47041096	4.20128953	1.581572
74	0.42950627	8.92438600	3.83307974		74.00000000	0.46405405	4.14139750	1.603053
75	0.43931946	8.93283180	3.92436684		75.00000000	0.45786667	4.09004592	1.624438
76	0.44946909	8.92235280	4.01032179		76.00000000	0.45184211	4.03149467	1.645795
77	0.45962390	8.92092990	4.10027259		77.00000000	0.44597403	3.97850302	1.667167
78	0.46945274	8.91066270	4.18313502		78.00000000	0.44025641	3.92297637	1.688641
79	0.47958747	8.90040590	4.26852315		79.00000000	0.43468354	3.86885998	1.710023
80	0.48939249	8.88868240	4.35005441		80.00000000	0.42925000	3.81546692	1.731432
81	0.49956441	8.87280370	4.43253695		81.00000000	0.42395062	3.76163061	1.752814
82	0.50939697	8.84729000	4.50678272		82.00000000	0.41878049	3.70507242	1.774300
83	0.51951158	8.81012630	4.57696263		83.00000000	0.41373494	3.64505707	1.795674
84	0.52926826	8.76505950	4.63906779		84.00000000	0.40880952	3.58323980	1.817023
85	0.53943127	8.68236830	4.68354096		85.00000000	0.40400000	3.50767679	1.838410
86	0.54957861	8.58362100	4.71737450		86.00000000	0.39930233	3.42745983	1.859888
87	0.55933827	8.43174740	4.71619900		87.00000000	0.39471264	3.32811731	1.881283
88	0.56950867	8.21966360	4.68116968		88.00000000	0.39022727	3.20753691	1.902651
89	0.57931370	7.93822290	4.59872128		89.00000000	0.38584270	3.06290533	1.924011
90	0.58943135	7.56583260	4.45953892		90.00000000	0.38155556	2.88678546	1.945486
91	0.59920955	7.04840520	4.22347171		91.00000000	0.37736264	2.65980478	1.966857
92	0.60932118	6.38019610	3.88758862		92.00000000	0.37326087	2.38147754	1.988335
93	0.61909717	5.55512620	3.43916291		93.00000000	0.36924731	2.05121542	2.009735
94	0.62924159	4.50044300	2.83186591		94.00000000	0.36531915	1.64409801	2.031229
95	0.63935250	3.19676280	2.04385829		95.00000000	0.36147368	1.15554563	2.052601
96	0.64914638	1.67719760	1.08874675		96.00000000	0.35770833	0.59994756	2.073990
97	0.65919995	-0.19050358	-0.12557995		97.00000000	0.35402062	-0.06744220	2.095478
98	0.66896105	-2.32169600	-1.55312419		98.00000000	0.35040816	-0.81354123	2.116852
99	0.67901170	-4.88445330	-3.31660094		99.00000000	0.34686869	-1.69426390	2.138260
100	0.68894321	-7.80412960	-5.37660210		100.00000000	0.34340000	-2.67993810	2.159647
101	0.69556725	-9.99646280	-6.95321214		101.00000000	0.34000000	-3.39879735	2.181127
