# Supplementary material for: Study on the Electrical Injection Regeneration of Industrialized B-Doped Czochralski Silicon PERC Solar Cells
Source: Hindawi journal article supplement (doi:10.1155/2019/5357370), 2019-06-20
Supplement: f1 [file 5357370.f1.zip › section3.2/IVRawData_1-10-6h.csv]

20:51 02/04/2018
Test Lot:	JK-PERC
Recipe:	Recipe_YJX-LID
Cell Name:	1-10-6h
Test Order:	2
Test Condition:	Light
1	-0.29991850	8.92693230	-2.67735215		1.00000000	34.34000000	306.55085518	0.000000
2	-0.29003647	8.94061280	-2.59310378		2.00000000	17.17000000	153.51032178	0.061809
3	-0.27994677	8.91442390	-2.49556418		3.00000000	11.44666667	102.04043891	0.083244
4	-0.27011016	8.94278430	-2.41553690		4.00000000	8.58500000	76.77380322	0.104732
5	-0.25998399	8.92220780	-2.31963118		5.00000000	6.86800000	61.27772317	0.126169
6	-0.24979530	8.93726060	-2.23248569		6.00000000	5.72333333	51.15092150	0.147528
7	-0.24000482	8.93330670	-2.14403667		7.00000000	4.90571429	43.82425030	0.168895
8	-0.22983252	8.92109110	-2.05035685		8.00000000	4.29250000	38.29378355	0.190369
9	-0.22004724	8.93247890	-1.96556733		9.00000000	3.81555556	34.08236949	0.211744
10	-0.20985408	8.92824840	-1.87362935		10.00000000	3.43400000	30.65960501	0.233071
11	-0.20004277	8.93176650	-1.78673531		11.00000000	3.12181818	27.88335106	0.254445
12	-0.18988682	8.92871090	-1.69544452		12.00000000	2.86166667	25.55099436	0.275917
13	-0.18015291	8.93142800	-1.60902274		13.00000000	2.64153846	23.59271058	0.297300
14	-0.16999623	8.93284130	-1.51854934		14.00000000	2.45285714	21.91098359	0.318670
15	-0.16016704	8.93097880	-1.43044844		15.00000000	2.28933333	20.44598747	0.340039
16	-0.15001334	8.93074510	-1.33973090		16.00000000	2.14625000	19.16761167	0.361516
17	-0.13987079	8.93603900	-1.24989083		17.00000000	2.02000000	18.05079878	0.382896
18	-0.13005650	8.92940330	-1.16132694		18.00000000	1.90777778	17.03531718	0.404258
19	-0.11990502	8.91968250	-1.06951471		19.00000000	1.80736842	16.12115248	0.425616
20	-0.11009073	8.93673610	-0.98385180		20.00000000	1.71700000	15.34437588	0.447093
21	-0.09994298	8.93595700	-0.89308613		21.00000000	1.63523810	14.61241730	0.468467
22	-0.09011900	8.93254280	-0.80499180		22.00000000	1.56090909	13.94288726	0.489859
23	-0.08000176	8.92654130	-0.71413905		23.00000000	1.49304348	13.32771427	0.511196
24	-0.07019714	8.93757250	-0.62739198		24.00000000	1.43083333	12.78817665	0.532666
25	-0.05996900	8.90385720	-0.53395545		25.00000000	1.37360000	12.23033825	0.554062
26	-0.04986443	8.92628100	-0.44510388		26.00000000	1.32076923	11.78955729	0.575445
27	-0.04001961	8.92505650	-0.35717727		27.00000000	1.27185185	11.35134964	0.596920
28	-0.02991875	8.92034150	-0.26688548		28.00000000	1.22642857	10.94016168	0.618303
29	-0.02005384	8.94341370	-0.17934975		29.00000000	1.18413793	10.59023540	0.639648
30	-0.00990981	8.91928200	-0.08838838		30.00000000	1.14466667	10.20960480	0.661012
31	-0.00068424	8.92936710	-0.00610987		31.00000000	1.10774194	9.89143439	0.682604
32	0.00946702	8.93420310	0.08458026		32.00000000	1.07312500	9.58751670	0.703990
33	0.01927434	8.91850760	0.17189837		33.00000000	1.04060606	9.28065306	0.725389
34	0.02944413	8.95215990	0.26358856		34.00000000	1.01000000	9.04168150	0.746768
35	0.03925964	8.92256830	0.35029684		35.00000000	0.98114286	8.75431415	0.768237
36	0.04940264	8.93302630	0.44131505		36.00000000	0.95388889	8.52111453	0.789621
37	0.05925387	8.92916010	0.52908730		37.00000000	0.92810811	8.28722589	0.810976
38	0.06936561	8.92871950	0.61934604		38.00000000	0.90368421	8.06874283	0.832347
39	0.07951529	8.92532830	0.70970009		39.00000000	0.88051282	7.85886600	0.853821
40	0.08935686	8.93683340	0.79856733		40.00000000	0.85850000	7.67227147	0.875192
41	0.09948869	8.92798140	0.88823317		41.00000000	0.83756098	7.47772881	0.896541
42	0.10927591	8.92322540	0.97509358		42.00000000	0.81761905	7.29579905	0.917911
43	0.11945761	8.93111610	1.06688978		43.00000000	0.79860465	7.13243086	0.939390
44	0.12927015	8.92970090	1.15434377		44.00000000	0.78045455	6.96922566	0.960760
45	0.13942058	8.92766280	1.24469993		45.00000000	0.76311111	6.81279868	0.982109
46	0.14922790	8.91941740	1.33102593		46.00000000	0.74652174	6.65853899	1.003484
47	0.15938057	8.93100550	1.42342875		47.00000000	0.73063830	6.52533466	1.024952
48	0.16952953	8.92551710	1.51313872		48.00000000	0.71541667	6.38546369	1.046345
49	0.17933536	8.92953400	1.60138119		49.00000000	0.70081633	6.25796322	1.067722
50	0.18947463	8.92662140	1.69136829		50.00000000	0.68680000	6.13080358	1.089094
51	0.19927898	8.93703170	1.78096256		51.00000000	0.67333333	6.01760134	1.110569
52	0.20941676	8.92169000	1.86835141		52.00000000	0.66038462	5.89174682	1.131930
53	0.21924269	8.92721080	1.95722571		53.00000000	0.64792453	5.78415885	1.153313
54	0.22936335	8.92705920	2.04754020		54.00000000	0.63592593	5.67694839	1.174660
55	0.23921534	8.91940210	2.13365781		55.00000000	0.62436364	5.56895033	1.196122
56	0.24935536	8.92230610	2.22482485		56.00000000	0.61321429	5.47128556	1.217493
57	0.25950283	8.92902280	2.31710669		57.00000000	0.60245614	5.37934461	1.238872
58	0.26933470	8.92612740	2.40411585		58.00000000	0.59206897	5.28488302	1.260344
59	0.27947545	8.92957880	2.49559805		59.00000000	0.58203390	5.19731756	1.281724
60	0.28927684	8.92988400	2.58320863		60.00000000	0.57233333	5.11087028	1.303089
61	0.29943770	8.92083550	2.67123446		61.00000000	0.56295082	5.02199166	1.324474
62	0.30925393	8.93364430	2.76276461		62.00000000	0.55387097	4.94808621	1.345966
63	0.31942597	8.93572140	2.85430148		63.00000000	0.54507937	4.87067735	1.367344
64	0.32924372	8.92441560	2.93830779		64.00000000	0.53656250	4.78850675	1.388726
65	0.33936810	8.92550180	3.02903059		65.00000000	0.52830769	4.71541126	1.410100
66	0.34921485	8.92394830	3.11637527		66.00000000	0.52030303	4.64315734	1.431587
67	0.35934222	8.92227270	3.20614928		67.00000000	0.51253731	4.57299768	1.452985
68	0.36951128	8.92132950	3.29653188		68.00000000	0.50500000	4.50527140	1.474326
69	0.37931710	8.92589380	3.38574415		69.00000000	0.49768116	4.44224918	1.495697
70	0.38948542	8.91843610	3.47360083		70.00000000	0.49057143	4.37512994	1.517178
71	0.39931357	8.91393380	3.55945473		71.00000000	0.48366197	4.31133080	1.538556
72	0.40945804	8.93001080	3.65646472		72.00000000	0.47694444	4.25911904	1.559911
73	0.41927505	8.90880010	3.73523761		73.00000000	0.47041096	4.19079720	1.581297
74	0.42942622	8.93112950	3.83526118		74.00000000	0.46405405	4.14452685	1.602780
75	0.43926555	8.90485000	3.91159383		75.00000000	0.45786667	4.07723399	1.624147
76	0.44940782	8.92847250	4.01252536		76.00000000	0.45184211	4.03425981	1.645496
77	0.45951506	8.89470480	4.08725081		77.00000000	0.44597403	3.96680731	1.666864
78	0.46940801	8.91342640	4.18403375		78.00000000	0.44025641	3.92419311	1.688334
79	0.47953612	8.89120200	4.26365251		79.00000000	0.43468354	3.86485920	1.709706
80	0.48932037	8.88098240	4.34564559		80.00000000	0.42925000	3.81216170	1.731057
81	0.49947748	8.86138820	4.42606385		81.00000000	0.42395062	3.75679100	1.752431
82	0.50928855	8.84400940	4.50415272		82.00000000	0.41878049	3.70369857	1.773906
83	0.51942259	8.78927520	4.56534809		83.00000000	0.41373494	3.63643025	1.795277
84	0.52920014	8.75627040	4.63381952		84.00000000	0.40880952	3.57964673	1.816673
85	0.53937811	8.67006490	4.67644322		85.00000000	0.40400000	3.50270622	1.838023
86	0.54951590	8.55210490	4.69951762		86.00000000	0.39930233	3.41487538	1.859498
87	0.55931580	8.40995690	4.70382177		87.00000000	0.39471264	3.31951632	1.880884
88	0.56942010	8.19040200	4.66377953		88.00000000	0.39022727	3.19611824	1.902270
89	0.57923335	7.89509490	4.57310227		89.00000000	0.38584270	3.04626471	1.923750
90	0.58934808	7.50546600	4.42333198		90.00000000	0.38155556	2.86375225	1.945141
91	0.59917027	6.99221750	4.18952885		91.00000000	0.37736264	2.63860164	1.966492
92	0.60926563	6.31615160	3.84821408		92.00000000	0.37326087	2.35757224	1.987962
93	0.61906773	5.48487420	3.39550862		93.00000000	0.36924731	2.02527505	2.009471
94	0.62920851	4.42213250	2.78244340		94.00000000	0.36531915	1.61548968	2.030837
95	0.63930166	3.12928960	2.00056004		95.00000000	0.36147368	1.13115584	2.052256
96	0.64905614	1.61553290	1.04857155		96.00000000	0.35770833	0.57788958	2.073654
97	0.65914178	-0.21626580	-0.14254982		97.00000000	0.35402062	-0.07656255	2.095138
98	0.66893798	-2.31052060	-1.54559498		98.00000000	0.35040816	-0.80962528	2.116532
99	0.67895371	-4.79453040	-3.25526420		99.00000000	0.34686869	-1.66307246	2.137872
100	0.68886745	-7.62437960	-5.25218693		100.00000000	0.34340000	-2.61821195	2.159240
101	0.69628042	-9.99540620	-6.95960563		101.00000000	0.34000000	-3.39843811	2.180731
20:52 02/04/2018
Test Lot:	JK-PERC
Recipe:	Recipe_YJX-LID
Cell Name:	1-10-6h
Test Order:	3
Test Condition:	Light
1	-0.29984838	8.93315030	-2.67859065		1.00000000	34.34000000	306.76438130	0.000000
2	-0.29007742	8.91365150	-2.58564903		2.00000000	17.17000000	153.04739626	0.061733
3	-0.27991721	8.94710830	-2.50444959		3.00000000	11.44666667	102.41456634	0.083246
4	-0.27014178	8.92636780	-2.41138489		4.00000000	8.58500000	76.63286756	0.104634
5	-0.25994211	8.92890930	-2.32099952		5.00000000	6.86800000	61.32374907	0.126000
6	-0.24978785	8.92237760	-2.22870152		6.00000000	5.72333333	51.06574113	0.147391
7	-0.23997223	8.93712040	-2.14466071		7.00000000	4.90571429	43.84295922	0.168912
8	-0.22987825	8.92462540	-2.05157727		8.00000000	4.29250000	38.30895453	0.190311
9	-0.22002095	8.93204500	-1.96523703		9.00000000	3.81555556	34.08071392	0.211664
10	-0.20987563	8.94177630	-1.87666093		10.00000000	3.43400000	30.70605981	0.233038
11	-0.20002502	8.92917820	-1.78605905		11.00000000	3.12181818	27.87527085	0.254529
12	-0.18988639	8.92356400	-1.69446335		12.00000000	2.86166667	25.53626565	0.275901
13	-0.18008119	8.93700980	-1.60938736		13.00000000	2.64153846	23.60745512	0.297248
14	-0.16992395	8.92664620	-1.51685098		14.00000000	2.45285714	21.89578789	0.318625
15	-0.16012023	8.91764160	-1.42789482		15.00000000	2.28933333	20.41545417	0.340103
16	-0.15000170	8.93744750	-1.34063232		16.00000000	2.14625000	19.18199670	0.361475
17	-0.13980500	8.93754770	-1.24951386		17.00000000	2.02000000	18.05384635	0.382830
18	-0.12998568	8.93397620	-1.16128897		18.00000000	1.90777778	17.04404126	0.404195
19	-0.11985671	8.90699580	-1.06756321		19.00000000	1.80736842	16.09822294	0.425660
20	-0.11002844	8.95180800	-0.98495347		20.00000000	1.71700000	15.37025434	0.447035
21	-0.09984961	8.92140290	-0.89079862		21.00000000	1.63523810	14.58861789	0.468417
22	-0.09008908	8.92953680	-0.80445371		22.00000000	1.56090909	13.93819517	0.489765
23	-0.07990354	8.93264100	-0.71374966		23.00000000	1.49304348	13.33682139	0.511249
24	-0.07010356	8.91895960	-0.62525078		24.00000000	1.43083333	12.76154469	0.532621
25	-0.05995897	8.92422200	-0.53508714		25.00000000	1.37360000	12.25831134	0.554016
26	-0.04980247	8.94899940	-0.44568228		26.00000000	1.32076923	11.81956305	0.575515
27	-0.03997494	8.91991900	-0.35657325		27.00000000	1.27185185	11.34481550	0.596889
28	-0.02985566	8.94346330	-0.26701299		28.00000000	1.22642857	10.96851892	0.618254
29	-0.02000953	8.92782500	-0.17864156		29.00000000	1.18413793	10.57177622	0.639622
30	-0.00987908	8.93291470	-0.08824896		30.00000000	1.14466667	10.22520969	0.661083
31	-0.00066559	8.91647340	-0.00593468		31.00000000	1.10774194	9.87715150	0.682581
32	0.00946763	8.92988400	0.08454486		32.00000000	1.07312500	9.58288177	0.703931
33	0.01929711	8.92906950	0.17230525		33.00000000	1.04060606	9.29164384	0.725313
34	0.02944290	8.92605880	0.26280907		34.00000000	1.01000000	9.01531939	0.746785
35	0.03926791	8.91353130	0.35001577		35.00000000	0.98114286	8.74544757	0.768169
36	0.04942338	8.94423290	0.44205420		36.00000000	0.95388889	8.53180438	0.789529
37	0.05923500	8.92278000	0.52854083		37.00000000	0.92810811	8.28130446	0.810902
38	0.06936739	8.93241600	0.61961835		38.00000000	0.90368421	8.07208330	0.832378
39	0.07951616	8.92865940	0.70997269		39.00000000	0.88051282	7.86179907	0.853766
40	0.08935308	8.92375280	0.79736477		40.00000000	0.85850000	7.66104178	0.875111
41	0.09946761	8.93113900	0.88835901		41.00000000	0.83756098	7.48037349	0.896480
42	0.10929857	8.92522810	0.97551467		42.00000000	0.81761905	7.29743650	0.917962
43	0.11946148	8.93753430	1.06769108		43.00000000	0.79860465	7.13755646	0.939350
44	0.12929393	8.92753600	1.15427621		44.00000000	0.78045455	6.96753605	0.960709
45	0.13943452	8.92990400	1.24513688		45.00000000	0.76311111	6.81450896	0.982080
46	0.14925134	8.91955570	1.33125564		46.00000000	0.74652174	6.65864223	1.003560
47	0.15941499	8.92765810	1.42320253		47.00000000	0.73063830	6.52288892	1.024938
48	0.16957270	8.92626290	1.51365050		48.00000000	0.71541667	6.38599725	1.046297
49	0.17936718	8.93092350	1.60191456		49.00000000	0.70081633	6.25893700	1.067662
50	0.18952042	8.91644670	1.68984872		50.00000000	0.68680000	6.12381559	1.089129
51	0.19927844	8.93366050	1.78028593		51.00000000	0.67333333	6.01533140	1.110506
52	0.20945029	8.92798140	1.86996829		52.00000000	0.66038462	5.89590156	1.131884
53	0.21926488	8.92866900	1.95774354		53.00000000	0.64792453	5.78510365	1.153248
54	0.22943673	8.92839530	2.04850182		54.00000000	0.63592593	5.67779805	1.174729
55	0.23923568	8.92412190	2.13496837		55.00000000	0.62436364	5.57189720	1.196104
56	0.24940380	8.93011760	2.22720526		56.00000000	0.61321429	5.47607569	1.217488
57	0.25954735	8.92344760	2.31605718		57.00000000	0.60245614	5.37598580	1.238955
58	0.26935822	8.92855740	2.40498033		58.00000000	0.59206897	5.28632174	1.260391
59	0.27953231	8.92483620	2.49478008		59.00000000	0.58203390	5.19455721	1.281734
60	0.28933126	8.92271800	2.58162124		60.00000000	0.57233333	5.10676894	1.303107
61	0.29949641	8.92406180	2.67272447		61.00000000	0.56295082	5.02380791	1.324598
62	0.30929166	8.92744060	2.76118292		62.00000000	0.55387097	4.94465016	1.345961
63	0.31943968	8.93090340	2.85288492		63.00000000	0.54507937	4.86805115	1.367305
64	0.32925501	8.91262630	2.93452686		64.00000000	0.53656250	4.78218105	1.388683
65	0.33939484	8.94203000	3.03487884		65.00000000	0.52830769	4.72414323	1.410165
66	0.34924293	8.91439060	3.11328789		66.00000000	0.52030303	4.63818444	1.431557
67	0.35936415	8.93571660	3.21117620		67.00000000	0.51253731	4.57988818	1.452916
68	0.36953452	8.91623780	3.29485766		68.00000000	0.50500000	4.50270009	1.474292
69	0.37935579	8.93361380	3.38901812		69.00000000	0.49768116	4.44609127	1.495763
70	0.38949117	8.91813850	3.47353620		70.00000000	0.49057143	4.37498394	1.517142
71	0.39930949	8.92080210	3.56216094		71.00000000	0.48366197	4.31465273	1.538491
72	0.40944114	8.91924670	3.65190654		72.00000000	0.47694444	4.25398516	1.559867
73	0.41927508	8.91427040	3.73753144		73.00000000	0.47041096	4.19337049	1.581343
74	0.42943501	8.91668700	3.82913757		74.00000000	0.46405405	4.13782475	1.602723
75	0.43925110	8.93095680	3.92293260		75.00000000	0.45786667	4.08918742	1.624082
76	0.44938496	8.89245130	3.99613387		76.00000000	0.45184211	4.01798392	1.645455
77	0.45953003	8.92132090	4.09961486		77.00000000	0.44597403	3.97867740	1.666943
78	0.46938851	8.89371970	4.17460984		78.00000000	0.44025641	3.91551711	1.688331
79	0.47954622	8.89042570	4.26337004		79.00000000	0.43468354	3.86452175	1.709698
80	0.48937720	8.88035110	4.34584136		80.00000000	0.42925000	3.81189071	1.731060
81	0.49951628	8.85312180	4.42227847		81.00000000	0.42395062	3.75328645	1.752532
82	0.50930929	8.83349420	4.49898066		82.00000000	0.41878049	3.69929501	1.773902
83	0.51948041	8.79315760	4.56787312		83.00000000	0.41373494	3.63803653	1.795289
84	0.52924657	8.74944880	4.63061577		84.00000000	0.40880952	3.57685800	1.816645
85	0.53938717	8.65634820	4.66912316		85.00000000	0.40400000	3.49716467	1.838112
86	0.54952925	8.57252120	4.71085115		86.00000000	0.39930233	3.42302765	1.859536
87	0.55932450	8.40882300	4.70326072		87.00000000	0.39471264	3.31906876	1.880922
88	0.56944644	8.20553780	4.67261429		88.00000000	0.39022727	3.20202464	1.902398
89	0.57927221	7.91750570	4.58639102		89.00000000	0.38584270	3.05491175	1.923788
90	0.58940166	7.51359940	4.42852796		90.00000000	0.38155556	2.86685559	1.945151
91	0.59920955	7.02700900	4.21065090		91.00000000	0.37736264	2.65173065	1.966532
92	0.60931140	6.35261770	3.87072238		92.00000000	0.37326087	2.37118361	1.988083
93	0.61911559	5.52198600	3.41874762		93.00000000	0.36924731	2.03897849	2.009475
94	0.62920254	4.45841360	2.80524516		94.00000000	0.36531915	1.62874386	2.030817
95	0.63932675	3.15124990	2.01467836		95.00000000	0.36147368	1.13909391	2.052211
96	0.64912349	1.61897030	1.05091165		96.00000000	0.35770833	0.57911917	2.073694
97	0.65916437	-0.22283754	-0.14688657		97.00000000	0.35402062	-0.07888908	2.095069
98	0.66894251	-2.35846450	-1.57767716		98.00000000	0.35040816	-0.82642521	2.116433
99	0.67899746	-4.91213990	-3.33533052		99.00000000	0.34686869	-1.70386752	2.137801
100	0.68889093	-7.80502890	-5.37681362		100.00000000	0.34340000	-2.68024692	2.159320
101	0.69552529	-9.99667070	-6.95293729		101.00000000	0.34000000	-3.39886804	2.180715
20:52 02/04/2018
Test Lot:	JK-PERC
Recipe:	Recipe_YJX-LID
Cell Name:	1-10-6h
Test Order:	4
Test Condition:	Light
1	-0.29982159	8.93078800	-2.67764306		1.00000000	34.34000000	306.68325992	0.000000
2	-0.29001245	8.92061810	-2.58709031		2.00000000	17.17000000	153.16701278	0.061792
3	-0.27990410	8.93740840	-2.50161725		3.00000000	11.44666667	102.30353482	0.083215
4	-0.27006891	8.92641260	-2.41074652		4.00000000	8.58500000	76.63325217	0.104704
5	-0.25988317	8.92943950	-2.32061104		5.00000000	6.86800000	61.32739049	0.126078
6	-0.24973166	8.93516060	-2.23139249		6.00000000	5.72333333	51.13890250	0.147436
7	-0.23992774	8.91749950	-2.13955550		7.00000000	4.90571429	43.74670469	0.168820
8	-0.22976282	8.93594650	-2.05314827		8.00000000	4.29250000	38.35755035	0.190304
9	-0.21995443	8.93204780	-1.96464348		9.00000000	3.81555556	34.08072461	0.211672
10	-0.20981705	8.92489050	-1.87259420		10.00000000	3.43400000	30.64807398	0.233014
11	-0.19999303	8.92948820	-1.78583540		11.00000000	3.12181818	27.87623862	0.254393
12	-0.18984376	8.93094640	-1.69548444		12.00000000	2.86166667	25.55739161	0.275874
13	-0.18007705	8.92264460	-1.60676352		13.00000000	2.64153846	23.56950889	0.297248
14	-0.16991585	8.93625550	-1.51841145		14.00000000	2.45285714	21.91935813	0.318603
15	-0.16010448	8.92465880	-1.42887786		15.00000000	2.28933333	20.43151888	0.339974
16	-0.14996563	8.92380710	-1.33826435		16.00000000	2.14625000	19.15272099	0.361444
17	-0.13981336	8.92951300	-1.24846522		17.00000000	2.02000000	18.03761626	0.382837
18	-0.12999456	8.93665600	-1.16171666		18.00000000	1.90777778	17.04915372	0.404197
19	-0.11986016	8.92932800	-1.07027068		19.00000000	1.80736842	16.13858545	0.425577
20	-0.11002572	8.92613220	-0.98210412		20.00000000	1.71700000	15.32616899	0.447057
21	-0.09987421	8.92576030	-0.89145322		21.00000000	1.63523810	14.59574327	0.468427
22	-0.09004571	8.93329620	-0.80440503		22.00000000	1.56090909	13.94406325	0.489817
23	-0.07993960	8.91188050	-0.71241220		23.00000000	1.49304348	13.30582506	0.511194
24	-0.07006497	8.93495850	-0.62602759		24.00000000	1.43083333	12.78443645	0.532672
25	-0.05993727	8.93450450	-0.53550983		25.00000000	1.37360000	12.27243538	0.554063
26	-0.04982967	8.91594410	-0.44427858		26.00000000	1.32076923	11.77590463	0.575446
27	-0.03996099	8.93068310	-0.35687896		27.00000000	1.27185185	11.35850584	0.596798
28	-0.02981543	8.92136290	-0.26599431		28.00000000	1.22642857	10.94141436	0.618259
29	-0.01999885	8.93101980	-0.17861016		29.00000000	1.18413793	10.57555931	0.639641
30	-0.00986446	8.92769910	-0.08806693		30.00000000	1.14466667	10.21923957	0.661017
31	-0.00064332	8.93008040	-0.00574491		31.00000000	1.10774194	9.89222455	0.682540
32	0.00950724	8.92947290	0.08489465		32.00000000	1.07312500	9.58244061	0.704004
33	0.01934512	8.93118380	0.17277485		33.00000000	1.04060606	9.29384399	0.725373
34	0.02950081	8.92552660	0.26331030		34.00000000	1.01000000	9.01478187	0.746751
35	0.03933423	8.92961500	0.35123953		35.00000000	0.98114286	8.76122797	0.768122
36	0.04946387	8.92984390	0.44170466		36.00000000	0.95388889	8.51807888	0.789607
37	0.05928464	8.92305660	0.52900015		37.00000000	0.92810811	8.28156118	0.810986
38	0.06942990	8.92732050	0.61982301		38.00000000	0.90368421	8.06747858	0.832345
39	0.07956699	8.92516900	0.71014886		39.00000000	0.88051282	7.85872573	0.853720
40	0.08939669	8.93732360	0.79896710		40.00000000	0.85850000	7.67269231	0.875197
41	0.09953898	8.91071220	0.88696322		41.00000000	0.83756098	7.46326480	0.896590
42	0.10933667	8.92392440	0.97571218		42.00000000	0.81761905	7.29637057	0.917979
43	0.11950502	8.91761590	1.06569987		43.00000000	0.79860465	7.12164954	0.939318
44	0.12935853	8.93675610	1.15604563		44.00000000	0.78045455	6.97473192	0.960795
45	0.13949487	8.91825680	1.24405107		45.00000000	0.76311111	6.80562086	0.982174
46	0.14927842	8.92313960	1.33203218		46.00000000	0.74652174	6.66131769	1.003566
47	0.15944751	8.92451480	1.42299166		47.00000000	0.73063830	6.52059230	1.025051
48	0.16960171	8.92349340	1.51343974		48.00000000	0.71541667	6.38401590	1.046444
49	0.17940907	8.93496700	1.60301412		49.00000000	0.70081633	6.26177075	1.067794
50	0.18953797	8.92026140	1.69072824		50.00000000	0.68680000	6.12643553	1.089177
51	0.19931929	8.94231510	1.78237590		51.00000000	0.67333333	6.02115883	1.110663
52	0.20947275	8.91461560	1.86736904		52.00000000	0.66038462	5.88707499	1.132036
53	0.21925555	8.93093300	1.95815663		53.00000000	0.64792453	5.78657055	1.153398
54	0.22943133	8.92179490	2.04693927		54.00000000	0.63592593	5.67360068	1.174780
55	0.23925880	8.92193980	2.13465261		55.00000000	0.62436364	5.57053478	1.196257
56	0.24940407	8.92001250	2.22468742		56.00000000	0.61321429	5.46987909	1.217644
57	0.25956795	8.92919920	2.31773393		57.00000000	0.60245614	5.37945089	1.238996
58	0.26939318	8.91444020	2.40148939		58.00000000	0.59206897	5.27796339	1.260371
59	0.27955258	8.92720030	2.49562188		59.00000000	0.58203390	5.19593319	1.281868
60	0.28935996	8.93164730	2.58446111		60.00000000	0.57233333	5.11187947	1.303246
61	0.29950896	8.93410110	2.67584333		61.00000000	0.56295082	5.02945954	1.324600
62	0.30932972	8.91283510	2.75700479		62.00000000	0.55387097	4.93656060	1.345979
63	0.31947127	8.93934250	2.85586310		63.00000000	0.54507937	4.87265113	1.367459
64	0.32931286	8.92505550	2.93913555		64.00000000	0.53656250	4.78885009	1.388838
65	0.33943284	8.91732410	3.02683264		65.00000000	0.52830769	4.71109092	1.410207
66	0.34928709	8.92436790	3.11716649		66.00000000	0.52030303	4.64337566	1.431583
67	0.35942045	8.92127900	3.20649011		67.00000000	0.51253731	4.57248837	1.453051
68	0.36957392	8.91807170	3.29588672		68.00000000	0.50500000	4.50362621	1.474419
69	0.37940064	8.92416760	3.38583490		69.00000000	0.49768116	4.44139008	1.495775
70	0.38956675	8.92036630	3.47507811		70.00000000	0.49057143	4.37607684	1.517144
71	0.39938006	8.91794680	3.56165013		71.00000000	0.48366197	4.31327173	1.538627
72	0.40951863	8.92633910	3.65550216		72.00000000	0.47694444	4.25736784	1.559995
73	0.41935131	8.90914540	3.73606179		73.00000000	0.47041096	4.19095963	1.581383
74	0.42949435	8.91841890	3.83041053		74.00000000	0.46405405	4.13862845	1.602723
75	0.43930840	8.90752120	3.91314889		75.00000000	0.45786667	4.07845704	1.624193
76	0.44945517	8.90967080	4.00449760		76.00000000	0.45184211	4.02576441	1.645584
77	0.45959747	8.91364290	4.09668773		77.00000000	0.44597403	3.97525321	1.666974
78	0.46944353	8.89851280	4.17734926		78.00000000	0.44025641	3.91762730	1.688448
79	0.47962081	8.88601210	4.26191632		79.00000000	0.43468354	3.86260323	1.709841
80	0.48942891	8.88544750	4.34879488		80.00000000	0.42925000	3.81407834	1.731187
81	0.49952582	8.84697440	4.41929214		81.00000000	0.42395062	3.75068026	1.752569
82	0.50937039	8.84216500	4.50393703		82.00000000	0.41878049	3.70292617	1.774050
83	0.51950079	8.78780750	4.56527294		83.00000000	0.41373494	3.63582301	1.795431
84	0.52929997	8.75717160	4.63517067		84.00000000	0.40880952	3.58001515	1.816788
85	0.53942144	8.66376500	4.67342059		85.00000000	0.40400000	3.50016106	1.838158
86	0.54956591	8.56975170	4.70964339		86.00000000	0.39930233	3.42192178	1.859635
87	0.55938524	8.40481950	4.70153197		87.00000000	0.39471264	3.31748852	1.881015
88	0.56951338	8.20496370	4.67283661		88.00000000	0.39022727	3.20180061	1.902372
89	0.57929319	7.91265540	4.58374739		89.00000000	0.38584270	3.05304030	1.923754
90	0.58941835	7.53104110	4.43893382		90.00000000	0.38155556	2.87351057	1.945242
91	0.59920269	7.01118610	4.20112157		91.00000000	0.37736264	2.64575968	1.966616
92	0.60930997	6.33918860	3.86253082		92.00000000	0.37326087	2.36617105	1.988079
93	0.61911732	5.51823660	3.41643585		93.00000000	0.36924731	2.03759403	2.009532
94	0.62927753	4.43604140	2.79150118		94.00000000	0.36531915	1.62057087	2.031049
95	0.63932377	3.14691570	2.01189801		95.00000000	0.36147368	1.13752721	2.052440
96	0.64914083	1.61189710	1.04634822		96.00000000	0.35770833	0.57658903	2.073791
97	0.65917373	-0.24838042	-0.16372585		97.00000000	0.35402062	-0.08793179	2.095162
98	0.66898775	-2.36846690	-1.58447534		98.00000000	0.35040816	-0.82993014	2.116646
99	0.67907500	-4.93876930	-3.35379476		99.00000000	0.34686869	-1.71310442	2.138017
100	0.68897170	-7.84140970	-5.40250937		100.00000000	0.34340000	-2.69274009	2.159380
101	0.69550049	-9.99681470	-6.95278952		101.00000000	0.34000000	-3.39891700	2.180754
20:54 02/04/2018
Test Lot:	JK-PERC
Recipe:	Recipe_YJX-LID
Cell Name:	1-10-6h
Test Order:	5
Test Condition:	Light
1	-0.29988819	8.81255530	-2.64278126		1.00000000	34.34000000	302.62314900	0.000000
2	-0.29006064	8.81486130	-2.55684431		2.00000000	17.17000000	151.35116852	0.061706
3	-0.27991232	8.81255340	-2.46674227		3.00000000	11.44666667	100.87436125	0.083251
4	-0.27010339	8.80105500	-2.37719479		4.00000000	8.58500000	75.55705718	0.104634
5	-0.25997442	8.82227130	-2.29356486		5.00000000	6.86800000	60.59135929	0.126002
6	-0.24979186	8.80991650	-2.20064543		6.00000000	5.72333333	50.42208877	0.147370
7	-0.23995836	8.81632040	-2.11554978		7.00000000	4.90571429	43.25034893	0.168895
8	-0.22981972	8.81368540	-2.02555871		8.00000000	4.29250000	37.83274458	0.190265
9	-0.22002567	8.79673100	-1.93550663		9.00000000	3.81555556	33.56441584	0.211604
10	-0.20988554	8.80895230	-1.84887171		10.00000000	3.43400000	30.24994220	0.232980
11	-0.20005429	8.80498890	-1.76147580		11.00000000	3.12181818	27.48757444	0.254460
12	-0.18991266	8.82147030	-1.67530889		12.00000000	2.86166667	25.24410751	0.275845
13	-0.18009926	8.80280110	-1.58537796		13.00000000	2.64153846	23.25293767	0.297202
14	-0.16993085	8.81324100	-1.49764153		14.00000000	2.45285714	21.61762114	0.318581
15	-0.16009958	8.80715180	-1.41002130		15.00000000	2.28933333	20.16250619	0.340067
16	-0.14997284	8.80560780	-1.32060201		16.00000000	2.14625000	18.89903574	0.361455
17	-0.13979699	8.80613520	-1.23107119		17.00000000	2.02000000	17.78839310	0.382818
18	-0.13002452	8.80560300	-1.14494430		18.00000000	1.90777778	16.79913372	0.404186
19	-0.11984271	8.81465820	-1.05637253		19.00000000	1.80736842	15.93133487	0.425671
20	-0.11005685	8.80164240	-0.96868104		20.00000000	1.71700000	15.11242000	0.447060
21	-0.09986983	8.81106470	-0.87995949		21.00000000	1.63523810	14.40818866	0.468440
22	-0.09008099	8.79881570	-0.79260604		22.00000000	1.56090909	13.73415142	0.489805
23	-0.07993341	8.80480480	-0.70379809		23.00000000	1.49304348	13.14595638	0.511287
24	-0.07009992	8.80069640	-0.61692811		24.00000000	1.43083333	12.59232977	0.532664
25	-0.05994639	8.81005860	-0.52813119		25.00000000	1.37360000	12.10149649	0.554040
26	-0.04979137	8.80601500	-0.43846352		26.00000000	1.32076923	11.63071366	0.575509
27	-0.03994745	8.80270770	-0.35164576		27.00000000	1.27185185	11.19574009	0.596961
28	-0.02981178	8.81161210	-0.26268987		28.00000000	1.22642857	10.80681284	0.618342
29	-0.01999169	8.80202670	-0.17596737		29.00000000	1.18413793	10.42281369	0.639714
30	-0.00989919	8.80749510	-0.08718704		30.00000000	1.14466667	10.08164606	0.661103
31	-0.00068792	8.80696770	-0.00605847		31.00000000	1.10774194	9.75584745	0.682710
32	0.00945276	8.80299470	0.08321256		32.00000000	1.07312500	9.44671369	0.704086
33	0.01924727	8.80143070	0.16940348		33.00000000	1.04060606	9.15882213	0.725472
34	0.02944219	8.79980370	0.25908547		34.00000000	1.01000000	8.88780174	0.746828
35	0.03924116	8.80653760	0.34557876		35.00000000	0.98114286	8.64047146	0.768306
36	0.04941450	8.80643750	0.43516571		36.00000000	0.95388889	8.40036288	0.789691
37	0.05922911	8.80603030	0.52157330		37.00000000	0.92810811	8.17294812	0.811074
38	0.06938682	8.80739210	0.61111691		38.00000000	0.90368421	7.95910118	0.832425
39	0.07950210	8.80649380	0.70013473		39.00000000	0.88051282	7.75423069	0.853904
40	0.08935987	8.80606370	0.78690873		40.00000000	0.85850000	7.56000569	0.875276
41	0.09945581	8.80663590	0.87587112		41.00000000	0.83756098	7.37609456	0.896661
42	0.10931879	8.82059760	0.96425706		42.00000000	0.81761905	7.21188861	0.918178
43	0.11944524	8.79751400	1.05082117		43.00000000	0.79860465	7.02573560	0.939553
44	0.12928367	8.80862330	1.13881115		44.00000000	0.78045455	6.87473009	0.960916
45	0.13939820	8.80970670	1.22805726		45.00000000	0.76311111	6.72278507	0.982295
46	0.14923662	8.79435160	1.31243931		46.00000000	0.74652174	6.56517465	1.003774
47	0.15943229	8.81491660	1.40538234		47.00000000	0.73063830	6.44051566	1.025160
48	0.16956246	8.79772280	1.49176352		48.00000000	0.71541667	6.29403752	1.046508
49	0.17938228	8.80279250	1.57906499		49.00000000	0.70081633	6.16914070	1.067883
50	0.18950798	8.79887390	1.66745682		50.00000000	0.68680000	6.04306659	1.089373
51	0.19930695	8.81060600	1.75601501		51.00000000	0.67333333	5.93247471	1.110748
52	0.20945871	8.80424400	1.84412559		52.00000000	0.66038462	5.81418729	1.132100
53	0.21928522	8.80940910	1.93177321		53.00000000	0.64792453	5.70783224	1.153478
54	0.22941093	8.79685780	2.01809533		54.00000000	0.63592593	5.59414994	1.174950
55	0.23925233	8.81248860	2.10840843		55.00000000	0.62436364	5.50219743	1.196319
56	0.24940483	8.79716870	2.19405636		56.00000000	0.61321429	5.39454952	1.217662
57	0.25953647	8.81030370	2.28659512		57.00000000	0.60245614	5.30782156	1.239036
58	0.26938236	8.80456830	2.37179539		58.00000000	0.59206897	5.21291165	1.260509
59	0.27953336	8.79944610	2.45973873		59.00000000	0.58203390	5.12157592	1.281893
60	0.28931746	8.78973870	2.54302487		60.00000000	0.57233333	5.03066045	1.303235
61	0.29949600	8.81243520	2.63928909		61.00000000	0.56295082	4.96096762	1.324618
62	0.30929869	8.79874900	2.72144154		62.00000000	0.55387097	4.87337162	1.346095
63	0.31944376	8.78763960	2.80715664		63.00000000	0.54507937	4.78996101	1.367479
64	0.32926729	8.82607650	2.90613829		64.00000000	0.53656250	4.73574167	1.388856
65	0.33941382	8.79706480	2.98584537		65.00000000	0.52830769	4.64755700	1.410215
66	0.34922993	8.80476190	3.07488638		66.00000000	0.52030303	4.58114430	1.431687
67	0.35936680	8.80550770	3.16440712		67.00000000	0.51253731	4.51315126	1.453072
68	0.36954460	8.79760550	3.25110761		68.00000000	0.50500000	4.44279078	1.474452
69	0.37935400	8.80039410	3.33846470		69.00000000	0.49768116	4.37979034	1.495820
70	0.38951617	8.79656120	3.42640283		70.00000000	0.49057143	4.31534159	1.517306
71	0.39930546	8.80417440	3.51555491		71.00000000	0.48366197	4.25824435	1.538677
72	0.40945277	8.78240780	3.59598120		72.00000000	0.47694444	4.18872061	1.560061
73	0.41929191	8.79496860	3.68765918		73.00000000	0.47041096	4.13724961	1.581548
74	0.42943549	8.77881240	3.76993360		74.00000000	0.46405405	4.07384348	1.602952
75	0.43924713	8.77945520	3.85635050		75.00000000	0.45786667	4.01981989	1.624310
76	0.44940856	8.77292350	3.94262692		76.00000000	0.45184211	3.96397622	1.645680
77	0.45955285	8.77207570	4.03123239		77.00000000	0.44597403	3.91211792	1.667155
78	0.46941584	8.75873470	4.11148881		78.00000000	0.44025641	3.85608910	1.688546
79	0.47956908	8.74304100	4.19289213		79.00000000	0.43468354	3.80045605	1.709888
80	0.48937923	8.71293640	4.26393011		80.00000000	0.42925000	3.74002795	1.731270
81	0.49952132	8.69660190	4.34413806		81.00000000	0.42395062	3.68692974	1.752748
82	0.50931287	8.64630220	4.40367299		82.00000000	0.41878049	3.62090265	1.774129
83	0.51946759	8.59403420	4.46432223		83.00000000	0.41373494	3.55565222	1.795483
84	0.52925241	8.51153760	4.50475179		84.00000000	0.40880952	3.47959763	1.816858
85	0.53937739	8.39721780	4.52926942		85.00000000	0.40400000	3.39247599	1.838338
86	0.54951423	8.21854310	4.51620638		86.00000000	0.39930233	3.28168337	1.859717
87	0.55934376	8.00653740	4.47840673		87.00000000	0.39471264	3.16028154	1.881072
88	0.56943369	7.68712520	4.37730807		88.00000000	0.39022727	2.99972590	1.902448
89	0.57924908	7.27393770	4.21342172		89.00000000	0.38584270	2.80659574	1.923936
90	0.58935690	6.71375990	3.95680072		90.00000000	0.38155556	2.56167239	1.945309
91	0.59916329	6.00352670	3.59709281		91.00000000	0.37736264	2.26550667	1.966650
92	0.60926819	5.06630560	3.08673884		92.00000000	0.37326087	1.89105363	1.988129
93	0.61908948	3.96924920	2.45732042		93.00000000	0.36924731	1.46563460	2.009624
94	0.62917352	2.58423160	1.62593009		94.00000000	0.36531915	0.94406929	2.031017
95	0.63922554	0.96420527	0.61634463		95.00000000	0.36147368	0.34853483	2.052383
96	0.64902008	-0.85983598	-0.55805082		96.00000000	0.35770833	-0.30757050	2.073803
97	0.65910113	-2.98942760	-1.97033511		97.00000000	0.35402062	-1.05831901	2.095297
98	0.66882938	-5.35094020	-3.57886602		98.00000000	0.35040816	-1.87501313	2.116693
99	0.67910540	-8.10457420	-5.50386010		99.00000000	0.34686869	-2.81122301	2.138082
100	0.68545473	-9.99657630	-6.85220051		100.00000000	0.34340000	-3.43282430	2.159445
101	0.68545103	-10.00025900	-6.85468783		101.00000000	0.34000000	-3.40008806	2.180935
