# Supplementary material for: Study on the Electrical Injection Regeneration of Industrialized B-Doped Czochralski Silicon PERC Solar Cells
Source: Hindawi journal article supplement (doi:10.1155/2019/5357370), 2019-06-20
Supplement: f1 [file 5357370.f1.zip › section3.2/IVRawData_1-10-7h.csv]

21:57 02/04/2018
Test Lot:	JK-PERC
Recipe:	Recipe_YJX-LID
Cell Name:	1-10-7h
Test Order:	2
Test Condition:	Light
1	-0.29987147	8.94105050	-2.68116596		1.00000000	34.34000000	307.03567417	0.000000
2	-0.29009524	8.93846420	-2.59300592		2.00000000	17.17000000	153.47343031	0.061831
3	-0.27997735	8.95060350	-2.50596625		3.00000000	11.44666667	102.45457473	0.083259
4	-0.27012074	8.95038990	-2.41768594		4.00000000	8.58500000	76.83909729	0.104749
5	-0.25998649	8.93760490	-2.32365653		5.00000000	6.86800000	61.38347045	0.126140
6	-0.24984330	8.94571690	-2.23502743		6.00000000	5.72333333	51.19931972	0.147489
7	-0.24002017	8.93718720	-2.14510519		7.00000000	4.90571429	43.84328692	0.168856
8	-0.22983606	8.95451640	-2.05807077		8.00000000	4.29250000	38.43726165	0.190324
9	-0.22004940	8.94506450	-1.96835608		9.00000000	3.81555556	34.13039055	0.211693
10	-0.20992111	8.93300060	-1.87522540		10.00000000	3.43400000	30.67592406	0.233063
11	-0.20007490	8.94605260	-1.78988058		11.00000000	3.12181818	27.92794966	0.254418
12	-0.18993619	8.94372750	-1.69873753		12.00000000	2.86166667	25.59396686	0.275904
13	-0.18016665	8.95049950	-1.61258151		13.00000000	2.64153846	23.64308868	0.297274
14	-0.17002124	8.93957710	-1.51991798		14.00000000	2.45285714	21.92750554	0.318665
15	-0.16021150	8.94697380	-1.43340809		15.00000000	2.28933333	20.48260535	0.340065
16	-0.15003856	8.93696020	-1.34088864		16.00000000	2.14625000	19.18095083	0.361512
17	-0.13990282	8.94460870	-1.25137598		17.00000000	2.02000000	18.06810957	0.382873
18	-0.13009085	8.94344430	-1.16346027		18.00000000	1.90777778	17.06210429	0.404250
19	-0.11992758	8.94567010	-1.07283257		19.00000000	1.80736842	16.16812164	0.425729
20	-0.11012156	8.94425200	-0.98495498		20.00000000	1.71700000	15.35728068	0.447101
21	-0.09994266	8.95695500	-0.89518193		21.00000000	1.63523810	14.64675403	0.468441
22	-0.09013367	8.93292330	-0.80515713		22.00000000	1.56090909	13.94348119	0.489822
23	-0.08001282	8.96031950	-0.71694044		23.00000000	1.49304348	13.37814659	0.511309
24	-0.07015918	8.94693180	-0.62770935		24.00000000	1.43083333	12.80156825	0.532690
25	-0.06002418	8.94660470	-0.53701264		25.00000000	1.37360000	12.28905622	0.554055
26	-0.04985198	8.93464950	-0.44540993		26.00000000	1.32076923	11.80061015	0.575430
27	-0.04001768	8.95234390	-0.35825202		27.00000000	1.27185185	11.38605517	0.596912
28	-0.02989535	8.94426350	-0.26739184		28.00000000	1.22642857	10.96950031	0.618299
29	-0.02003946	8.94050690	-0.17916296		29.00000000	1.18413793	10.58679334	0.639653
30	-0.00990968	8.94419670	-0.08863415		30.00000000	1.14466667	10.23812382	0.661030
31	-0.00068496	8.93414500	-0.00611953		31.00000000	1.10774194	9.89672707	0.682623
32	0.00942824	8.95892720	0.08446692		32.00000000	1.07312500	9.61404875	0.703990
33	0.01926523	8.93631460	0.17216019		33.00000000	1.04060606	9.29918313	0.725347
34	0.02943566	8.94751930	0.26337614		34.00000000	1.01000000	9.03699449	0.746712
35	0.03923544	8.94974900	0.35114733		35.00000000	0.98114286	8.78098230	0.768191
36	0.04939098	8.93529800	0.44132312		36.00000000	0.95388889	8.52328148	0.789585
37	0.05920639	8.96192650	0.53060331		37.00000000	0.92810811	8.31763665	0.810940
38	0.06934035	8.93479250	0.61954162		38.00000000	0.90368421	8.07423091	0.832306
39	0.07950705	8.93968870	0.71076830		39.00000000	0.88051282	7.87151051	0.853768
40	0.08931800	8.94913670	0.79931899		40.00000000	0.85850000	7.68283386	0.875149
41	0.09944972	8.95294280	0.89036763		41.00000000	0.83756098	7.49863551	0.896522
42	0.10927183	8.93634990	0.97649131		42.00000000	0.81761905	7.30652989	0.917882
43	0.11944970	8.94685650	1.06869932		43.00000000	0.79860465	7.14500121	0.939359
44	0.12926883	8.94511410	1.15632443		44.00000000	0.78045455	6.98125496	0.960743
45	0.13939460	8.94297310	1.24660216		45.00000000	0.76311111	6.82448214	0.982130
46	0.14920926	8.94482710	1.33465103		46.00000000	0.74652174	6.67750788	1.003519
47	0.15932611	8.94093700	1.42452471		47.00000000	0.73063830	6.53259099	1.024974
48	0.16952109	8.95519730	1.51809481		48.00000000	0.71541667	6.40669740	1.046355
49	0.17932311	8.93599610	1.60243061		49.00000000	0.70081633	6.26249196	1.067735
50	0.18947938	8.95159440	1.69614256		50.00000000	0.68680000	6.14795503	1.089223
51	0.19925758	8.93513970	1.78039431		51.00000000	0.67333333	6.01632740	1.110587
52	0.20941982	8.94684700	1.87364709		52.00000000	0.66038462	5.90836012	1.131927
53	0.21921663	8.94478420	1.96084545		53.00000000	0.64792453	5.79554508	1.153298
54	0.22933421	8.93146320	2.04829006		54.00000000	0.63592593	5.67974901	1.174764
55	0.23914143	8.94083880	2.13812498		55.00000000	0.62436364	5.58233463	1.196139
56	0.24934535	8.94924640	2.23145298		56.00000000	0.61321429	5.48780574	1.217499
57	0.25947931	8.93992230	2.31972487		57.00000000	0.60245614	5.38591108	1.238867
58	0.26934978	8.93842410	2.40756256		58.00000000	0.59206897	5.29216351	1.260334
59	0.27948079	8.95241260	2.50202735		59.00000000	0.58203390	5.21060760	1.281715
60	0.28928873	8.94589040	2.58794527		60.00000000	0.57233333	5.12003127	1.303068
61	0.29941973	8.94694710	2.67889249		61.00000000	0.56295082	5.03669120	1.324452
62	0.30924034	8.94528290	2.76624233		62.00000000	0.55387097	4.95453250	1.345945
63	0.31943160	8.94517420	2.85737131		63.00000000	0.54507937	4.87582987	1.367324
64	0.32922021	8.94450660	2.94471234		64.00000000	0.53656250	4.79928682	1.388673
65	0.33937725	8.93762300	3.03322592		65.00000000	0.52830769	4.72181498	1.410050
66	0.34920382	8.94661620	3.12419255		66.00000000	0.52030303	4.65495152	1.431531
67	0.35935119	8.93766500	3.21176055		67.00000000	0.51253731	4.58088681	1.452919
68	0.36949554	8.93522170	3.30152457		68.00000000	0.50500000	4.51228696	1.474266
69	0.37932882	8.94391820	3.39268594		69.00000000	0.49768116	4.45121958	1.495632
70	0.38945907	8.94186880	3.48249191		70.00000000	0.49057143	4.38662535	1.517110
71	0.39930648	8.92528150	3.56392274		71.00000000	0.48366197	4.31681925	1.538499
72	0.40943447	8.93342780	3.65765328		72.00000000	0.47694444	4.26074876	1.559959
73	0.41923723	8.93302730	3.74505762		73.00000000	0.47041096	4.20219394	1.581320
74	0.42940244	8.92697910	3.83326661		74.00000000	0.46405405	4.14260084	1.602780
75	0.43921563	8.93894480	3.92612427		75.00000000	0.45786667	4.09284486	1.624167
76	0.44935852	8.91866490	4.00767806		76.00000000	0.45184211	4.02982832	1.645548
77	0.45952225	8.93414690	4.10543929		77.00000000	0.44597403	3.98439746	1.666908
78	0.46936592	8.90397740	4.17922354		78.00000000	0.44025641	3.92003313	1.688380
79	0.47951627	8.91401390	4.27441470		79.00000000	0.43468354	3.87477516	1.709757
80	0.48932424	8.89739230	4.35370973		80.00000000	0.42925000	3.81920564	1.731141
81	0.49946639	8.86936860	4.42995152		81.00000000	0.42395062	3.76017429	1.752624
82	0.50926095	8.85387710	4.50893386		82.00000000	0.41878049	3.70783097	1.774001
83	0.51940906	8.79673860	4.56910573		83.00000000	0.41373494	3.63951811	1.795362
84	0.52918279	8.76640420	4.63903023		84.00000000	0.40880952	3.58378953	1.816744
85	0.53934205	8.67916010	4.68103600		85.00000000	0.40400000	3.50638068	1.838220
86	0.54948568	8.57116890	4.70973457		86.00000000	0.39930233	3.42248767	1.859595
87	0.55927426	8.41949460	4.70880661		87.00000000	0.39471264	3.32328097	1.880954
88	0.56942612	8.20086000	4.66978389		88.00000000	0.39022727	3.20019923	1.902329
89	0.57924670	7.92338090	4.58959224		89.00000000	0.38584270	3.05717865	1.923810
90	0.58933228	7.52297350	4.43353113		90.00000000	0.38155556	2.87043233	1.945179
91	0.59917450	7.01806210	4.20504385		91.00000000	0.37736264	2.64835442	1.966516
92	0.60927272	6.33839990	3.86181415		92.00000000	0.37326087	2.36587666	1.987998
93	0.61906654	5.51156430	3.41202504		93.00000000	0.36924731	2.03513030	2.009500
94	0.62921613	4.44811390	2.79882501		94.00000000	0.36531915	1.62498118	2.030936
95	0.63929576	3.15011240	2.01385350		95.00000000	0.36147368	1.13868273	2.052304
96	0.64909554	1.64000260	1.06451837		96.00000000	0.35770833	0.58664260	2.073682
97	0.65914315	-0.19968946	-0.13162394		97.00000000	0.35402062	-0.07069419	2.095170
98	0.66895932	-2.28423430	-1.52805982		98.00000000	0.35040816	-0.80041435	2.116550
99	0.67899728	-4.78561640	-3.24942052		99.00000000	0.34686869	-1.65998048	2.137894
100	0.68886477	-7.61325450	-5.24450281		100.00000000	0.34340000	-2.61439160	2.159257
101	0.69632679	-9.99529550	-6.95999203		101.00000000	0.34000000	-3.39840047	2.180744
21:57 02/04/2018
Test Lot:	JK-PERC
Recipe:	Recipe_YJX-LID
Cell Name:	1-10-7h
Test Order:	3
Test Condition:	Light
1	-0.29994068	8.95702360	-2.68657575		1.00000000	34.34000000	307.58419042	0.000000
2	-0.29008257	8.93641000	-2.59229678		2.00000000	17.17000000	153.43815970	0.021503
3	-0.27996692	8.95048810	-2.50584059		3.00000000	11.44666667	102.45325378	0.042937
4	-0.27015275	8.94653130	-2.41693003		4.00000000	8.58500000	76.80597121	0.064335
5	-0.26001775	8.94813540	-2.32667403		5.00000000	6.86800000	61.45579393	0.085849
6	-0.24986266	8.94010640	-2.23379877		6.00000000	5.72333333	51.16720896	0.107220
7	-0.24005367	8.95977690	-2.15082733		7.00000000	4.90571429	43.95410554	0.128582
8	-0.22988147	8.94399170	-2.05605796		8.00000000	4.29250000	38.39208437	0.149950
9	-0.22007395	8.93766980	-1.96694830		9.00000000	3.81555556	34.10217566	0.171435
10	-0.20994343	8.94120790	-1.87714785		10.00000000	3.43400000	30.70410793	0.192820
11	-0.20008829	8.94492720	-1.78977519		11.00000000	3.12181818	27.92443637	0.214157
12	-0.18996820	8.94157510	-1.69861493		12.00000000	2.86166667	25.58780741	0.235521
13	-0.18016665	8.95157810	-1.61277584		13.00000000	2.64153846	23.64593784	0.257000
14	-0.17002571	8.93610950	-1.51936836		14.00000000	2.45285714	21.91900002	0.278390
15	-0.16018917	8.93967060	-1.43203841		15.00000000	2.28933333	20.46588589	0.299732
16	-0.15005344	8.94876960	-1.34279366		16.00000000	2.14625000	19.20629675	0.321112
17	-0.13991101	8.93633460	-1.25029160		17.00000000	2.02000000	18.05139589	0.342605
18	-0.13008936	8.95291810	-1.16467939		18.00000000	1.90777778	17.08017820	0.363975
19	-0.11995661	8.93241790	-1.07150257		19.00000000	1.80736842	16.14417004	0.385343
20	-0.11010668	8.95189480	-0.98566342		20.00000000	1.71700000	15.37040337	0.406714
21	-0.09996052	8.93786330	-0.89343347		21.00000000	1.63523810	14.61553456	0.428181
22	-0.09010241	8.93812370	-0.80534650		22.00000000	1.56090909	13.95159854	0.449555
23	-0.08000092	8.95483680	-0.71639514		23.00000000	1.49304348	13.36996068	0.470897
24	-0.07014652	8.93315700	-0.62662984		24.00000000	1.43083333	12.78185881	0.492274
25	-0.05999590	8.94427200	-0.53661966		25.00000000	1.37360000	12.28585202	0.513762
26	-0.04985124	8.95277980	-0.44630713		26.00000000	1.32076923	11.82455609	0.535146
27	-0.04003108	8.94568350	-0.35810536		27.00000000	1.27185185	11.37758413	0.556589
28	-0.02990874	8.94804860	-0.26762487		28.00000000	1.22642857	10.97414246	0.577972
29	-0.02007444	8.94101240	-0.17948585		29.00000000	1.18413793	10.58739192	0.599450
30	-0.00993573	8.93750290	-0.08880064		30.00000000	1.14466667	10.23046165	0.620833
31	-0.00070580	8.94929120	-0.00631640		31.00000000	1.10774194	9.91350516	0.642327
32	0.00941931	8.94095710	0.08421764		32.00000000	1.07312500	9.59476459	0.663684
33	0.01926821	8.95515440	0.17254980		33.00000000	1.04060606	9.31878794	0.685157
34	0.02940440	8.92487340	0.26243055		34.00000000	1.01000000	9.01412213	0.706535
35	0.03923991	8.95055290	0.35121885		35.00000000	0.98114286	8.78177105	0.727918
36	0.04940140	8.94623950	0.44195675		36.00000000	0.95388889	8.53371846	0.749396
37	0.05922202	8.93715760	0.52927653		37.00000000	0.92810811	8.29464843	0.770774
38	0.06933514	8.94827840	0.62043014		38.00000000	0.90368421	8.08641790	0.792145
39	0.07944454	8.93438530	0.70978809		39.00000000	0.88051282	7.86684080	0.813527
40	0.08933288	8.94628910	0.79919776		40.00000000	0.85850000	7.68038919	0.834995
41	0.09942888	8.93889330	0.88878412		41.00000000	0.83756098	7.48686819	0.856374
42	0.10924429	8.94615940	0.97731683		42.00000000	0.81761905	7.31455033	0.877728
43	0.11942365	8.94143100	1.06781833		43.00000000	0.79860465	7.14066838	0.899100
44	0.12923013	8.94210050	1.15558881		44.00000000	0.78045455	6.97890298	0.920595
45	0.13942139	8.93851090	1.24621961		45.00000000	0.76311111	6.82107698	0.941976
46	0.14919810	8.95020580	1.33535370		46.00000000	0.74652174	6.68152320	0.963309
47	0.15937597	8.93293190	1.42369469		47.00000000	0.73063830	6.52674216	0.984695
48	0.16950695	8.94284340	1.51587411		48.00000000	0.71541667	6.39785922	1.006169
49	0.17932607	8.93740270	1.60270930		49.00000000	0.70081633	6.26347773	1.027552
50	0.18946673	8.94221590	1.69425241		50.00000000	0.68680000	6.14151388	1.048916
51	0.19926354	8.94188880	1.78179242		51.00000000	0.67333333	6.02087179	1.070288
52	0.20940346	8.93397330	1.87080492		52.00000000	0.66038462	5.89985852	1.091761
53	0.21919058	8.94440360	1.96052901		53.00000000	0.64792453	5.79529848	1.113132
54	0.22936919	8.93227580	2.04878887		54.00000000	0.63592593	5.68026576	1.134475
55	0.23921585	8.94857600	2.14064121		55.00000000	0.62436364	5.58716545	1.155862
56	0.24934535	8.93724730	2.22846106		56.00000000	0.61321429	5.48044772	1.177340
57	0.25949717	8.93558030	2.31875780		57.00000000	0.60245614	5.38329522	1.198708
58	0.26932150	8.95282650	2.41118866		58.00000000	0.59206897	5.30069072	1.220076
59	0.27949342	8.92808910	2.49534216		59.00000000	0.58203390	5.19645050	1.241437
60	0.28931999	8.95288940	2.59024987		60.00000000	0.57233333	5.12403703	1.262907
61	0.29945245	8.92918870	2.67386743		61.00000000	0.56295082	5.02669410	1.284311
62	0.30923736	8.93649010	2.76349661		62.00000000	0.55387097	4.94966242	1.305710
63	0.31938845	8.93905830	2.85503197		63.00000000	0.54507937	4.87249622	1.327073
64	0.32919639	8.95098690	2.94663257		64.00000000	0.53656250	4.80276391	1.348556
65	0.33938840	8.93992420	3.03410657		65.00000000	0.52830769	4.72303072	1.369935
66	0.34919190	8.94567200	3.12375620		66.00000000	0.52030303	4.65446025	1.391316
67	0.35935488	8.93266010	3.20999500		67.00000000	0.51253731	4.57832161	1.412799
68	0.36951268	8.93723770	3.30242265		68.00000000	0.50500000	4.51330504	1.434183
69	0.37932214	8.92113970	3.38398580		69.00000000	0.49768116	4.43988315	1.455547
70	0.38944790	8.94343380	3.48300151		70.00000000	0.49057143	4.38739310	1.476925
71	0.39928266	8.94006630	3.56961345		71.00000000	0.48366197	4.32397009	1.498399
72	0.40943000	8.93632600	3.65879995		72.00000000	0.47694444	4.26213104	1.519791
73	0.41923723	8.92791370	3.74291381		73.00000000	0.47041096	4.19978844	1.541159
74	0.42940170	8.92103770	3.83070875		74.00000000	0.46405405	4.13984371	1.562534
75	0.43920743	8.92610930	3.92041353		75.00000000	0.45786667	4.08696791	1.584015
76	0.44935703	8.93945880	4.01700866		76.00000000	0.45184211	4.03922388	1.605379
77	0.45952150	8.91180900	4.09516784		77.00000000	0.44597403	3.97443534	1.626723
78	0.46938381	8.91865630	4.18627287		78.00000000	0.44025641	3.92649561	1.648097
79	0.47949767	8.89733510	4.26625145		79.00000000	0.43468354	3.86752516	1.669581
80	0.48933911	8.90570640	4.35791044		80.00000000	0.42925000	3.82277447	1.690968
81	0.49948052	8.87092400	4.43085373		81.00000000	0.42395062	3.76083371	1.712322
82	0.50928921	8.85227010	4.50836565		82.00000000	0.41878049	3.70715799	1.733695
83	0.51944625	8.81548690	4.57917161		83.00000000	0.41373494	3.64727494	1.755167
84	0.52918202	8.76680660	4.63923643		84.00000000	0.40880952	3.58395403	1.776579
85	0.53932643	8.67675400	4.67960276		85.00000000	0.40400000	3.50540862	1.797941
86	0.54947376	8.58140090	4.71525462		86.00000000	0.39930233	3.42657334	1.819313
87	0.55927801	8.42175390	4.71010176		87.00000000	0.39471264	3.32417275	1.840795
88	0.56941199	8.21900370	4.67999925		88.00000000	0.39022727	3.20727940	1.862176
89	0.57922888	7.93993330	4.59903867		89.00000000	0.38584270	3.06356528	1.883556
90	0.58935016	7.54802890	4.44843204		90.00000000	0.38155556	2.87999236	1.904914
91	0.59914774	7.04360960	4.22016277		91.00000000	0.37736264	2.65799510	1.926382
92	0.60927498	6.37425990	3.88367707		92.00000000	0.37326087	2.37926179	1.947760
93	0.61904198	5.54103040	3.43013043		93.00000000	0.36924731	2.04601058	1.969143
94	0.62916481	4.47370390	2.81469706		94.00000000	0.36531915	1.63432970	1.990594
95	0.63930619	3.17033670	2.02681588		95.00000000	0.36147368	1.14599329	2.012094
96	0.64905763	1.64812530	1.06972830		96.00000000	0.35770833	0.58954815	2.033527
97	0.65909106	-0.21805944	-0.14372103		97.00000000	0.35402062	-0.07719754	2.054923
98	0.66892809	-2.34422660	-1.56811902		98.00000000	0.35040816	-0.82143614	2.076410
99	0.67894816	-4.90265460	-3.32864832		99.00000000	0.34686869	-1.70057736	2.097794
100	0.68887818	-7.80296470	-5.37529212		100.00000000	0.34340000	-2.67953808	2.119146
101	0.69547909	-9.99667260	-6.95247676		101.00000000	0.34000000	-3.39886868	2.140522
21:57 02/04/2018
Test Lot:	JK-PERC
Recipe:	Recipe_YJX-LID
Cell Name:	1-10-7h
Test Order:	4
Test Condition:	Light
1	-0.29989600	8.93507290	-2.67959262		1.00000000	34.34000000	306.83040339	0.000000
2	-0.29010266	8.92012790	-2.58775283		2.00000000	17.17000000	153.15859604	0.061759
3	-0.27993566	8.94840530	-2.50497774		3.00000000	11.44666667	102.42941267	0.083137
4	-0.27017355	8.93451690	-2.41387015		4.00000000	8.58500000	76.70282759	0.104654
5	-0.25998721	8.94291780	-2.32504425		5.00000000	6.86800000	61.41995945	0.126054
6	-0.24983883	8.94181630	-2.23401292		6.00000000	5.72333333	51.17699529	0.147437
7	-0.24000676	8.96092510	-2.15068260		7.00000000	4.90571429	43.95973828	0.168780
8	-0.22985242	8.94381050	-2.05575649		8.00000000	4.29250000	38.39130657	0.190246
9	-0.22005385	8.95047280	-1.96958600		9.00000000	3.81555556	34.15102622	0.211613
10	-0.20989355	8.94326310	-1.87713324		10.00000000	3.43400000	30.71116549	0.232992
11	-0.20008084	8.95011430	-1.79074639		11.00000000	3.12181818	27.94062955	0.254436
12	-0.18992800	8.94264600	-1.69845887		12.00000000	2.86166667	25.59087197	0.275904
13	-0.18011752	8.94899560	-1.61187089		13.00000000	2.64153846	23.63911607	0.297271
14	-0.16997433	8.94512750	-1.52044205		14.00000000	2.45285714	21.94111988	0.318659
15	-0.16021074	8.93990420	-1.43226867		15.00000000	2.28933333	20.46642068	0.340005
16	-0.15002887	8.93730740	-1.34085413		16.00000000	2.14625000	19.18169601	0.361488
17	-0.13987675	8.94482230	-1.25117267		17.00000000	2.02000000	18.06854105	0.382883
18	-0.13005958	8.94319820	-1.16314860		18.00000000	1.90777778	17.06163479	0.404249
19	-0.11991492	8.95032790	-1.07327785		19.00000000	1.80736842	16.17654000	0.425616
20	-0.11009923	8.94472220	-0.98480703		20.00000000	1.71700000	15.35808802	0.447097
21	-0.09989279	8.95835780	-0.89487534		21.00000000	1.63523810	14.64904795	0.468469
22	-0.09010761	8.92884920	-0.80455728		22.00000000	1.56090909	13.93712189	0.489860
23	-0.07994211	8.96004200	-0.71628464		23.00000000	1.49304348	13.37773227	0.511220
24	-0.07012790	8.92961410	-0.62621512		24.00000000	1.43083333	12.77678951	0.532702
25	-0.05997878	8.94727990	-0.53664690		25.00000000	1.37360000	12.28998367	0.554090
26	-0.04982593	8.94691940	-0.44578854		26.00000000	1.32076923	11.81681585	0.575473
27	-0.04002066	8.93769930	-0.35769259		27.00000000	1.27185185	11.36742941	0.596952
28	-0.02986557	8.94897080	-0.26726611		28.00000000	1.22642857	10.97527347	0.618340
29	-0.02004839	8.94542310	-0.17934136		29.00000000	1.18413793	10.59261480	0.639691
30	-0.00990745	8.92656520	-0.08843949		30.00000000	1.14466667	10.21794163	0.661054
31	-0.00068794	8.94105050	-0.00615087		31.00000000	1.10774194	9.90437659	0.682645
32	0.00948629	8.95607850	0.08495998		32.00000000	1.07312500	9.61099174	0.704027
33	0.01929947	8.93247890	0.17239211		33.00000000	1.04060606	9.29519168	0.725380
34	0.02946171	8.95006750	0.26368428		34.00000000	1.01000000	9.03956818	0.746766
35	0.03927712	8.93530650	0.35095309		35.00000000	0.98114286	8.76681215	0.768241
36	0.04942745	8.94520760	0.44213877		36.00000000	0.95388889	8.53273414	0.789626
37	0.05919150	8.94158650	0.52926594		37.00000000	0.92810811	8.29875893	0.810975
38	0.06935895	8.95013430	0.62077194		38.00000000	0.90368421	8.08809505	0.832345
39	0.07948844	8.93136600	0.70994036		39.00000000	0.88051282	7.86418227	0.853818
40	0.08933139	8.95338820	0.79981860		40.00000000	0.85850000	7.68648377	0.875178
41	0.09947948	8.93508430	0.88885756		41.00000000	0.83756098	7.48367792	0.896526
42	0.10929564	8.93689540	0.97676370		42.00000000	0.81761905	7.30697591	0.917910
43	0.11945490	8.94121070	1.06807143		43.00000000	0.79860465	7.14049245	0.939384
44	0.12922566	8.94250390	1.15560097		44.00000000	0.78045455	6.97921782	0.960762
45	0.13942584	8.94405460	1.24703233		45.00000000	0.76311111	6.82530744	0.982120
46	0.14923902	8.94399070	1.33479241		46.00000000	0.74652174	6.67688349	1.003499
47	0.15940572	8.94202330	1.42540966		47.00000000	0.73063830	6.53338468	1.024978
48	0.16955903	8.95193480	1.51788138		48.00000000	0.71541667	6.40436335	1.046355
49	0.17935584	8.93811800	1.60310366		49.00000000	0.70081633	6.26397902	1.067710
50	0.18951063	8.93976020	1.69417959		50.00000000	0.68680000	6.13982731	1.089063
51	0.19928361	8.94936470	1.78346170		51.00000000	0.67333333	6.02590556	1.110538
52	0.20943247	8.93559360	1.87140344		52.00000000	0.66038462	5.90092854	1.131914
53	0.21927392	8.94554620	1.96152498		53.00000000	0.64792453	5.79603880	1.153304
54	0.22943616	8.93681340	2.05042815		54.00000000	0.63592593	5.68315134	1.174660
55	0.23922998	8.94836810	2.14071792		55.00000000	0.62436364	5.58703565	1.196139
56	0.24937361	8.93680860	2.22860422		56.00000000	0.61321429	5.48017870	1.217529
57	0.25949863	8.94010070	2.31994388		57.00000000	0.60245614	5.38601856	1.238916
58	0.26935795	8.94697280	2.40993825		58.00000000	0.59206897	5.29722493	1.260401
59	0.27948821	8.93367100	2.49685572		59.00000000	0.58203390	5.19969936	1.281789
60	0.28933784	8.94300940	2.58755102		60.00000000	0.57233333	5.11838238	1.303143
61	0.29947031	8.94437120	2.67857362		61.00000000	0.56295082	5.03524110	1.324527
62	0.30929390	8.93856910	2.76464490		62.00000000	0.55387097	4.95081392	1.346006
63	0.31940329	8.95324990	2.85969747		63.00000000	0.54507937	4.88023177	1.367376
64	0.32924551	8.92653850	2.93902272		64.00000000	0.53656250	4.78964581	1.388740
65	0.33940998	8.94573500	3.03627174		65.00000000	0.52830769	4.72610061	1.410117
66	0.34919560	8.94209670	3.12254082		66.00000000	0.52030303	4.65260001	1.431596
67	0.35936156	8.93785480	3.21192144		67.00000000	0.51253731	4.58098409	1.452982
68	0.36951116	8.93585210	3.30189708		68.00000000	0.50500000	4.51260531	1.474324
69	0.37933475	8.94073200	3.39153034		69.00000000	0.49768116	4.44963387	1.495694
70	0.38947690	8.93790440	3.48110730		70.00000000	0.49057143	4.38468053	1.517179
71	0.39930421	8.92997930	3.56577833		71.00000000	0.48366197	4.31909140	1.538549
72	0.40946123	8.94766430	3.66372163		72.00000000	0.47694444	4.26753878	1.559901
73	0.41927442	8.92694380	3.74283918		73.00000000	0.47041096	4.19933219	1.581272
74	0.42940241	8.93946650	3.83862846		74.00000000	0.46405405	4.14839567	1.602751
75	0.43923941	8.92523960	3.92031698		75.00000000	0.45786667	4.08656970	1.624121
76	0.44939199	8.92387290	4.01031700		76.00000000	0.45184211	4.03218152	1.645480
77	0.45952892	8.91502950	4.09671388		77.00000000	0.44597403	3.97587160	1.666864
78	0.46939865	8.91755490	4.18588823		78.00000000	0.44025641	3.92601071	1.688331
79	0.47951922	8.90273860	4.26903427		79.00000000	0.43468354	3.86987397	1.709699
80	0.48931229	8.89072320	4.35034013		80.00000000	0.42925000	3.81634293	1.731049
81	0.49946409	8.86647800	4.42848737		81.00000000	0.42395062	3.75894882	1.752421
82	0.50931674	8.84951780	4.50720756		82.00000000	0.41878049	3.70600538	1.773908
83	0.51943952	8.81593510	4.57934510		83.00000000	0.41373494	3.64746038	1.795289
84	0.52924007	8.75232700	4.63208215		84.00000000	0.40880952	3.57803463	1.816682
85	0.53936654	8.68607430	4.68497784		85.00000000	0.40400000	3.50917402	1.838025
86	0.54951096	8.57573990	4.71246307		86.00000000	0.39930233	3.42431289	1.859501
87	0.55932635	8.42674540	4.71330075		87.00000000	0.39471264	3.32614295	1.880882
88	0.56945139	8.22003360	4.68090956		88.00000000	0.39022727	3.20768129	1.902263
89	0.57924074	7.93931870	4.59877684		89.00000000	0.38584270	3.06332814	1.923739
90	0.58937842	7.54493570	4.44682228		90.00000000	0.38155556	2.87881213	1.945118
91	0.59914541	7.03668590	4.21599806		91.00000000	0.37736264	2.65538235	1.966462
92	0.60928160	6.38117740	3.88793398		92.00000000	0.37326087	2.38184383	1.987943
93	0.61908585	5.54342790	3.43185777		93.00000000	0.36924731	2.04689585	2.009503
94	0.62922800	4.47709320	2.81711240		94.00000000	0.36531915	1.63556788	2.030897
95	0.63933593	3.17399480	2.02924892		95.00000000	0.36147368	1.14731559	2.052263
96	0.64911115	1.65089240	1.07161266		96.00000000	0.35770833	0.59053797	2.073638
97	0.65916026	-0.21856470	-0.14406916		97.00000000	0.35402062	-0.07737641	2.095120
98	0.66899055	-2.35631800	-1.57635447		98.00000000	0.35040816	-0.82567306	2.116515
99	0.67899948	-4.92069390	-3.34114860		99.00000000	0.34686869	-1.70683463	2.137874
100	0.68885136	-7.83521600	-5.39729920		100.00000000	0.34340000	-2.69061317	2.159243
101	0.69536370	-9.99693580	-6.95150627		101.00000000	0.34000000	-3.39895817	2.180718
22:00 02/04/2018
Test Lot:	JK-PERC
Recipe:	Recipe_YJX-LID
Cell Name:	1-10-7h
Test Order:	5
Test Condition:	Light
1	-0.29990104	8.80795960	-2.64151624		1.00000000	34.34000000	302.46533266	0.000000
2	-0.29007280	8.80654620	-2.55453951		2.00000000	17.17000000	151.20839825	0.061711
3	-0.27992302	8.82968620	-2.47163243		3.00000000	11.44666667	101.07047470	0.083233
4	-0.27008212	8.80054000	-2.37686850		4.00000000	8.58500000	75.55263590	0.104629
5	-0.25994575	8.81805610	-2.29221621		5.00000000	6.86800000	60.56240929	0.125990
6	-0.24975058	8.81226540	-2.20086839		6.00000000	5.72333333	50.43553231	0.147356
7	-0.23998114	8.80821610	-2.11380574		7.00000000	4.90571429	43.21059155	0.168879
8	-0.22984031	8.81075670	-2.02506705		8.00000000	4.29250000	37.82017313	0.190257
9	-0.22002026	8.81604670	-1.93970889		9.00000000	3.81555556	33.63811596	0.211595
10	-0.20983477	8.82009220	-1.85076202		10.00000000	3.43400000	30.28819661	0.233029
11	-0.20001993	8.80751900	-1.76167933		11.00000000	3.12181818	27.49547295	0.254513
12	-0.18990067	8.81048580	-1.67311716		12.00000000	2.86166667	25.21267353	0.275906
13	-0.18009476	8.81555080	-1.58763451		13.00000000	2.64153846	23.28661650	0.297268
14	-0.16993383	8.80346680	-1.49600683		14.00000000	2.45285714	21.59364642	0.318642
15	-0.16013983	8.80382920	-1.40984371		15.00000000	2.28933333	20.15489965	0.340117
16	-0.14998634	8.80905250	-1.32123754		16.00000000	2.14625000	18.90642893	0.361487
17	-0.13984773	8.80575180	-1.23146440		17.00000000	2.02000000	17.78761864	0.382867
18	-0.13002694	8.81275270	-1.14589527		18.00000000	1.90777778	16.81277376	0.404237
19	-0.11988461	8.80885890	-1.05604661		19.00000000	1.80736842	15.92085340	0.425704
20	-0.11006605	8.81613350	-0.97035699		20.00000000	1.71700000	15.13730122	0.447072
21	-0.09990884	8.80592820	-0.87979004		21.00000000	1.63523810	14.39978926	0.468456
22	-0.09011037	8.81470970	-0.79429674		22.00000000	1.56090909	13.75896050	0.489810
23	-0.07992711	8.80361560	-0.70364754		23.00000000	1.49304348	13.14418086	0.511287
24	-0.07011971	8.80852990	-0.61765155		24.00000000	1.43083333	12.60353820	0.532669
25	-0.05998408	8.80378910	-0.52808719		25.00000000	1.37360000	12.09288471	0.554050
26	-0.04984696	8.80849650	-0.43907679		26.00000000	1.32076923	11.63399115	0.575540
27	-0.04002393	8.81284430	-0.35272470		27.00000000	1.27185185	11.20863234	0.596926
28	-0.02982653	8.80793290	-0.26271008		28.00000000	1.22642857	10.80230056	0.618279
29	-0.02001988	8.81548120	-0.17648486		29.00000000	1.18413793	10.43874567	0.639646
30	-0.00988127	8.81219670	-0.08707572		30.00000000	1.14466667	10.08702782	0.661127
31	-0.00065665	8.81146720	-0.00578602		31.00000000	1.10774194	9.76083173	0.682621
32	0.00949812	8.80023100	0.08358569		32.00000000	1.07312500	9.44374789	0.703986
33	0.01929110	8.81804280	0.17010977		33.00000000	1.04060606	9.17610878	0.725362
34	0.02945993	8.80114360	0.25928110		34.00000000	1.01000000	8.88915504	0.746831
35	0.03929310	8.81030750	0.34618432		35.00000000	0.98114286	8.64417027	0.768222
36	0.04944184	8.80254550	0.43521402		36.00000000	0.95388889	8.39665035	0.789565
37	0.05926235	8.80508230	0.52180990		37.00000000	0.92810811	8.17206828	0.810944
38	0.06941257	8.81437300	0.61182832		38.00000000	0.90368421	7.96540971	0.832425
39	0.07956280	8.79248710	0.69955488		39.00000000	0.88051282	7.74189762	0.853801
40	0.08936918	8.80626870	0.78700899		40.00000000	0.85850000	7.56018168	0.875156
41	0.09949112	8.80901430	0.87641869		41.00000000	0.83756098	7.37808661	0.896536
42	0.10933843	8.80791090	0.96304315		42.00000000	0.81761905	7.20151572	0.918015
43	0.11946186	8.80463030	1.05181751		43.00000000	0.79860465	7.03141871	0.939395
44	0.12931885	8.81402400	1.13981945		44.00000000	0.78045455	6.87894509	0.960745
45	0.13947353	8.81431770	1.22936400		45.00000000	0.76311111	6.72630377	0.982121
46	0.14927395	8.81533430	1.31589977		46.00000000	0.74652174	6.58083869	1.003600
47	0.15942343	8.81053450	1.40460563		47.00000000	0.73063830	6.43731393	1.024973
48	0.16956770	8.80837150	1.49361530		48.00000000	0.71541667	6.30165578	1.046323
49	0.17936589	8.81418420	1.58096399		49.00000000	0.70081633	6.17712419	1.067693
50	0.18951537	8.79397580	1.66659358		50.00000000	0.68680000	6.03970258	1.089161
51	0.19930612	8.83131310	1.76013475		51.00000000	0.67333333	5.94641749	1.110534
52	0.20943029	8.79583360	1.84211398		52.00000000	0.66038462	5.80863319	1.131929
53	0.21927239	8.81814290	1.93357527		53.00000000	0.64792453	5.71349108	1.153270
54	0.22940624	8.79788300	2.01828926		54.00000000	0.63592593	5.59480189	1.174733
55	0.23922899	8.81407070	2.10858123		55.00000000	0.62436364	5.50318523	1.196116
56	0.24938889	8.77974030	2.18956969		56.00000000	0.61321429	5.38386218	1.217500
57	0.25953019	8.82039740	2.28915941		57.00000000	0.60245614	5.31390257	1.238980
58	0.26932094	8.79671480	2.36913950		58.00000000	0.59206897	5.20826183	1.260442
59	0.27950612	8.81064610	2.46262951		59.00000000	0.58203390	5.12809470	1.281818
60	0.28932962	8.80160620	2.54656538		60.00000000	0.57233333	5.03745262	1.303213
61	0.29946348	8.81017880	2.63832680		61.00000000	0.56295082	4.95969738	1.324556
62	0.30931449	8.80385400	2.72315961		62.00000000	0.55387097	4.87619913	1.346064
63	0.31948259	8.79746060	2.81063550		63.00000000	0.54507937	4.79531424	1.367454
64	0.32924655	8.80524060	2.89909509		64.00000000	0.53656250	4.72456191	1.388862
65	0.33940196	8.80493350	2.98841169		65.00000000	0.52830769	4.65171410	1.410216
66	0.34920835	8.80877400	3.07609743		66.00000000	0.52030303	4.58323181	1.431687
67	0.35939577	8.80022910	3.16276511		67.00000000	0.51253731	4.51044578	1.453064
68	0.36955047	8.80431650	3.25363930		68.00000000	0.50500000	4.44617983	1.474449
69	0.37937099	8.79794310	3.33768438		69.00000000	0.49768116	4.37857052	1.495819
70	0.38953760	8.80282780	3.42903241		70.00000000	0.49057143	4.31841581	1.517303
71	0.39934024	8.78632260	3.50873218		71.00000000	0.48366197	4.24961011	1.538679
72	0.40949568	8.80670450	3.60630745		72.00000000	0.47694444	4.20030879	1.560068
73	0.41929907	8.78220750	3.68237144		73.00000000	0.47041096	4.13124665	1.581558
74	0.42948055	8.79948810	3.77920899		74.00000000	0.46405405	4.08343813	1.602954
75	0.43927950	8.78689670	3.85990359		75.00000000	0.45786667	4.02322710	1.624308
76	0.44941407	8.78190710	3.94671261		76.00000000	0.45184211	3.96803539	1.645685
77	0.45955613	8.76289840	4.02704368		77.00000000	0.44597403	3.90802508	1.667168
78	0.46942502	8.75627330	4.11041377		78.00000000	0.44025641	3.85500545	1.688549
79	0.47956035	8.73709300	4.18996338		79.00000000	0.43468354	3.79787055	1.709890
80	0.48937938	8.71869560	4.26674985		80.00000000	0.42925000	3.74250009	1.731276
81	0.49951842	8.69320010	4.34241358		81.00000000	0.42395062	3.68548755	1.752757
82	0.50934792	8.63923450	4.40037612		82.00000000	0.41878049	3.61794284	1.774144
83	0.51946688	8.58747100	4.46090677		83.00000000	0.41373494	3.55293680	1.795504
84	0.52921742	8.50418000	4.50056020		84.00000000	0.40880952	3.47658978	1.816883
85	0.53936315	8.37357140	4.51639585		85.00000000	0.40400000	3.38292285	1.838359
86	0.54951191	8.20196250	4.50707608		86.00000000	0.39930233	3.27506270	1.859739
87	0.55932200	7.97623060	4.46128125		87.00000000	0.39471264	3.14831907	1.881100
88	0.56944096	7.63798670	4.34938248		88.00000000	0.39022727	2.98055072	1.902473
89	0.57925034	7.22114520	4.18285081		89.00000000	0.38584270	2.78622614	1.923957
90	0.58936405	6.63638400	3.91124615		90.00000000	0.38155556	2.53214918	1.945329
91	0.59916300	5.91489080	3.54398372		91.00000000	0.37736264	2.23205879	1.966681
92	0.60927528	4.98919770	3.03979483		92.00000000	0.37326087	1.86227227	1.988150
93	0.61909354	3.88268950	2.40374799		93.00000000	0.36924731	1.43367266	2.009659
94	0.62919617	2.52949550	1.59154888		94.00000000	0.36531915	0.92407314	2.031058
95	0.63921237	0.94232237	0.60234412		95.00000000	0.36147368	0.34062474	2.052416
96	0.64900833	-0.83194155	-0.53993700		96.00000000	0.35770833	-0.29759243	2.073786
97	0.65914595	-2.87412740	-1.89446944		97.00000000	0.35402062	-1.01750036	2.095267
98	0.66886598	-5.12828970	-3.43013852		98.00000000	0.35040816	-1.79699457	2.116649
99	0.67912561	-7.73454280	-5.25272610		99.00000000	0.34686869	-2.68287070	2.138034
100	0.68717700	-9.99337860	-6.86721993		100.00000000	0.34340000	-3.43172621	2.159390
101	0.68713009	-10.00002800	-6.87132014		101.00000000	0.34000000	-3.40000952	2.180866
22:00 02/04/2018
Test Lot:	JK-PERC
Recipe:	Recipe_YJX-LID
Cell Name:	1-10-7h
Test Order:	6
Test Condition:	Light
1	-0.29991490	8.81774040	-2.64457173		1.00000000	34.34000000	302.80120534	0.000000
2	-0.29005158	8.80875680	-2.55499383		2.00000000	17.17000000	151.24635426	0.061800
3	-0.27990094	8.80953500	-2.46579713		3.00000000	11.44666667	100.83981063	0.083230
4	-0.27007332	8.80372910	-2.37765235		4.00000000	8.58500000	75.58001432	0.104725
5	-0.25990632	8.82023240	-2.29243414		5.00000000	6.86800000	60.57735612	0.126092
6	-0.24980037	8.80522920	-2.19954951		6.00000000	5.72333333	50.39526179	0.147457
7	-0.23994671	8.81126210	-2.11423335		7.00000000	4.90571429	43.22553436	0.168835
8	-0.22979608	8.80470660	-2.02328706		8.00000000	4.29250000	37.79420308	0.190303
9	-0.21996698	8.81248860	-1.93845650		9.00000000	3.81555556	33.62453984	0.211697
10	-0.20981710	8.81185820	-1.84887853		10.00000000	3.43400000	30.25992106	0.233045
11	-0.20000884	8.81202320	-1.76248254		11.00000000	3.12181818	27.50953424	0.254423
12	-0.18986194	8.80551150	-1.67183150		12.00000000	2.86166667	25.19843874	0.275929
13	-0.18005888	8.83318230	-1.59049291		13.00000000	2.64153846	23.33319078	0.297300
14	-0.16992389	8.79436210	-1.49437222		14.00000000	2.45285714	21.57131389	0.318677
15	-0.16012010	8.80673790	-1.41013575		15.00000000	2.28933333	20.16155863	0.340031
16	-0.14999031	8.81343840	-1.32193036		16.00000000	2.14625000	18.91584217	0.361505
17	-0.13983893	8.81000710	-1.23198197		17.00000000	2.02000000	17.79621434	0.382902
18	-0.13002175	8.80827810	-1.14526773		18.00000000	1.90777778	16.80423722	0.404281
19	-0.11986814	8.80957320	-1.05598715		19.00000000	1.80736842	15.92214440	0.425694
20	-0.11004426	8.80030920	-0.96842351		20.00000000	1.71700000	15.11013090	0.447158
21	-0.09988098	8.80486200	-0.87943823		21.00000000	1.63523810	14.39804577	0.468511
22	-0.09011886	8.80762770	-0.79373339		22.00000000	1.56090909	13.74790615	0.489913
23	-0.07991613	8.81195160	-0.70421710		23.00000000	1.49304348	13.15662687	0.511281
24	-0.07010640	8.80949500	-0.61760194		24.00000000	1.43083333	12.60491910	0.532767
25	-0.05996767	8.81877040	-0.52884112		25.00000000	1.37360000	12.11346302	0.554135
26	-0.04982672	8.82241820	-0.43959215		26.00000000	1.32076923	11.65237850	0.575500
27	-0.04001772	8.79752730	-0.35205698		27.00000000	1.27185185	11.18915139	0.596865
28	-0.02984253	8.82694910	-0.26341848		28.00000000	1.22642857	10.82562257	0.618345
29	-0.02003427	8.79509740	-0.17620337		29.00000000	1.18413793	10.41460844	0.639729
30	-0.00989481	8.81666760	-0.08723923		30.00000000	1.14466667	10.09214551	0.661103
31	-0.00064551	8.80596160	-0.00568438		31.00000000	1.10774194	9.75473295	0.682573
32	0.00946993	8.80180170	0.08335241		32.00000000	1.07312500	9.44543345	0.704053
33	0.01932330	8.80803780	0.17020037		33.00000000	1.04060606	9.16569752	0.725426
34	0.02948183	8.80493350	0.25958553		34.00000000	1.01000000	8.89298284	0.746825
35	0.03930543	8.80631540	0.34613605		35.00000000	0.98114286	8.64025345	0.768356
36	0.04943121	8.79932310	0.43496121		36.00000000	0.95388889	8.39357653	0.789746
37	0.05927119	8.79943660	0.52155311		37.00000000	0.92810811	8.16682846	0.811102
38	0.06943046	8.80845170	0.61157488		38.00000000	0.90368421	7.96005872	0.832478
39	0.07956964	8.80270960	0.70042842		39.00000000	0.88051282	7.75089866	0.853958
40	0.08939920	8.81213470	0.78779776		40.00000000	0.85850000	7.56521764	0.875354
41	0.09952349	8.79829690	0.87563723		41.00000000	0.83756098	7.36911014	0.896717
42	0.10934710	8.81979660	0.96441918		42.00000000	0.81761905	7.21123370	0.918088
43	0.11949892	8.80091380	1.05169969		43.00000000	0.79860465	7.02845070	0.939565
44	0.12934485	8.81130700	1.13969718		44.00000000	0.78045455	6.87682460	0.960940
45	0.13945352	8.80318640	1.22763533		45.00000000	0.76311111	6.71780936	0.982310
46	0.14929722	8.80931280	1.31520591		46.00000000	0.74652174	6.57634351	1.003688
47	0.15945202	8.79520800	1.40241368		47.00000000	0.73063830	6.42611580	1.025166
48	0.16957557	8.80964850	1.49390117		48.00000000	0.71541667	6.30256936	1.046558
49	0.17942671	8.80620570	1.58006852		49.00000000	0.70081633	6.17153273	1.067906
50	0.18954878	8.81842140	1.67152102		50.00000000	0.68680000	6.05649182	1.089281
51	0.19931582	8.80363370	1.75470347		51.00000000	0.67333333	5.92778002	1.110763
52	0.20945573	8.80242730	1.84371884		52.00000000	0.66038462	5.81298757	1.132140
53	0.21930911	8.80790420	1.93165363		53.00000000	0.64792453	5.70685717	1.153477
54	0.22944158	8.80108360	2.01933453		54.00000000	0.63592593	5.59683724	1.174863
55	0.23928007	8.81855490	2.11010443		55.00000000	0.62436364	5.50598500	1.196342
56	0.24941106	8.80755230	2.19670096		56.00000000	0.61321429	5.40091689	1.217719
57	0.25955695	8.80941960	2.28654608		57.00000000	0.60245614	5.30728893	1.239096
58	0.26939023	8.80290130	2.37141561		58.00000000	0.59206897	5.21192467	1.260463
59	0.27951303	8.80478860	2.46105314		59.00000000	0.58203390	5.12468543	1.281939
60	0.28937310	8.80256270	2.54722486		60.00000000	0.57233333	5.03800005	1.303318
61	0.29950705	8.80315490	2.63660695		61.00000000	0.56295082	4.95574327	1.324700
62	0.30930388	8.81239220	2.72570710		62.00000000	0.55387097	4.88092820	1.346056
63	0.31945124	8.80864520	2.81393263		63.00000000	0.54507937	4.80141073	1.367527
64	0.32927185	8.80486390	2.89919383		64.00000000	0.53656250	4.72435979	1.388915
65	0.33943263	8.80256270	2.98787701		65.00000000	0.52830769	4.65046159	1.410311
66	0.34926292	8.79805850	3.07283560		66.00000000	0.52030303	4.57765650	1.431790
67	0.35940138	8.79965210	3.16260711		67.00000000	0.51253731	4.51015005	1.453160
68	0.36956808	8.80264570	3.25317687		68.00000000	0.50500000	4.44533608	1.474515
69	0.37939540	8.79854200	3.33812636		69.00000000	0.49768116	4.37886858	1.495894
70	0.38951522	8.79257580	3.42484210		70.00000000	0.49057143	4.31338647	1.517385
71	0.39936265	8.79782490	3.51352267		71.00000000	0.48366197	4.25517334	1.538783
72	0.40949512	8.78701210	3.59823857		72.00000000	0.47694444	4.19091660	1.560124
73	0.41933659	8.79962540	3.69000491		73.00000000	0.47041096	4.13944022	1.581506
74	0.42948171	8.79274460	3.77632299		74.00000000	0.46405405	4.08030878	1.602986
75	0.43930534	8.78555010	3.85953907		75.00000000	0.45786667	4.02261054	1.624362
76	0.44942963	8.77605440	3.94421888		76.00000000	0.45184211	3.96539090	1.645718
77	0.45957774	8.76723960	4.02922816		77.00000000	0.44597403	3.90996114	1.667090
78	0.46945268	8.75192930	4.10861667		78.00000000	0.44025641	3.85309298	1.688568
79	0.47959706	8.75053310	4.19672995		79.00000000	0.43468354	3.80371274	1.709959
80	0.48939463	8.72408680	4.26952123		80.00000000	0.42925000	3.74481426	1.731299
81	0.49949732	8.68108840	4.33618039		81.00000000	0.42395062	3.68035279	1.752676
82	0.50934327	8.65627770	4.40901679		82.00000000	0.41878049	3.62508020	1.774177
83	0.51950252	8.59663870	4.46597547		83.00000000	0.41373494	3.55672979	1.795544
84	0.52923906	8.51501850	4.50648039		84.00000000	0.40880952	3.48102066	1.816880
85	0.53939909	8.40380290	4.53300364		85.00000000	0.40400000	3.39513637	1.838257
86	0.54951888	8.23407650	4.52478050		86.00000000	0.39930233	3.28788590	1.859734
87	0.55932611	8.02083970	4.48626507		87.00000000	0.39471264	3.16592684	1.881125
88	0.56948316	7.69845680	4.38414151		88.00000000	0.39022727	3.00414780	1.902486
89	0.57926434	7.28596740	4.22050110		89.00000000	0.38584270	2.81123731	1.923843
90	0.58939832	6.72534080	3.96390457		90.00000000	0.38155556	2.56609115	1.945312
91	0.59916687	6.00689220	3.59913080		91.00000000	0.37736264	2.26677668	1.966684
92	0.60930157	5.08798030	3.10011438		92.00000000	0.37326087	1.89914395	1.988292
93	0.61907905	3.97748490	2.46237757		93.00000000	0.36924731	1.46867561	2.009693
94	0.62918919	2.60278460	1.63764393		94.00000000	0.36531915	0.95084705	2.031195
95	0.63921595	0.96120900	0.61442012		95.00000000	0.36147368	0.34745176	2.052574
96	0.64902991	-0.85375267	-0.55411102		96.00000000	0.35770833	-0.30539444	2.073967
97	0.65914750	-3.00614210	-1.98149105		97.00000000	0.35402062	-1.06423629	2.095451
98	0.66889143	-5.38176630	-3.59981736		98.00000000	0.35040816	-1.88581484	2.116824
99	0.67912889	-8.15637680	-5.53923112		99.00000000	0.34686869	-2.82919171	2.138186
100	0.68529069	-9.99669650	-6.85064304		100.00000000	0.34340000	-3.43286558	2.159559
101	0.68523484	-10.00010600	-6.85242103		101.00000000	0.34000000	-3.40003604	2.181097
22:00 02/04/2018
Test Lot:	JK-PERC
Recipe:	Recipe_YJX-LID
Cell Name:	1-10-7h
Test Order:	7
Test Condition:	Light
1	-0.29991499	8.79935460	-2.63905835		1.00000000	34.34000000	302.16983696	0.000000
2	-0.29009113	8.80674080	-2.55475739		2.00000000	17.17000000	151.21173954	0.061725
3	-0.27994946	8.80471520	-2.46487527		3.00000000	11.44666667	100.78463999	0.083172
4	-0.27014270	8.81613160	-2.38161359		4.00000000	8.58500000	75.68648979	0.104678
5	-0.25998837	8.80829620	-2.29005457		5.00000000	6.86800000	60.49537830	0.126063
6	-0.24984522	8.80706980	-2.20040429		6.00000000	5.72333333	50.40579616	0.147439
7	-0.24000497	8.80993370	-2.11442787		7.00000000	4.90571429	43.21901761	0.168795
8	-0.22985512	8.80012420	-2.02275360		8.00000000	4.29250000	37.77453313	0.190279
9	-0.22004242	8.82009320	-1.94079465		9.00000000	3.81555556	33.65355561	0.211647
10	-0.20990297	8.79565810	-1.84623476		10.00000000	3.43400000	30.20428992	0.233032
11	-0.20006943	8.80036930	-1.76068487		11.00000000	3.12181818	27.47315289	0.254385
12	-0.18991883	8.83079240	-1.67713376		12.00000000	2.86166667	25.27078425	0.275861
13	-0.18011580	8.80565640	-1.58603785		13.00000000	2.64153846	23.26048006	0.297227
14	-0.17003664	8.80800440	-1.49768347		14.00000000	2.45285714	21.60477651	0.318619
15	-0.16017111	8.81558420	-1.41200191		15.00000000	2.28933333	20.18181076	0.340098
16	-0.15007706	8.80990310	-1.32216436		16.00000000	2.14625000	18.90825453	0.361488
17	-0.13989297	8.80565260	-1.23184890		17.00000000	2.02000000	17.78741825	0.382842
18	-0.13004006	8.80671220	-1.14522538		18.00000000	1.90777778	16.80124983	0.404211
19	-0.11994826	8.80222130	-1.05581113		19.00000000	1.80736842	15.90885681	0.425692
20	-0.11009314	8.81104950	-0.97003611		20.00000000	1.71700000	15.12857199	0.447085
21	-0.09990978	8.80444150	-0.87964983		21.00000000	1.63523810	14.39735815	0.468439
22	-0.09009560	8.82068060	-0.79470447		22.00000000	1.56090909	13.76828054	0.489814
23	-0.07993680	8.80797390	-0.70408120		23.00000000	1.49304348	13.15068799	0.511293
24	-0.07015908	8.81076430	-0.61815510		24.00000000	1.43083333	12.60673525	0.532666
25	-0.05997945	8.80289940	-0.52799303		25.00000000	1.37360000	12.09166262	0.554015
26	-0.04980576	8.81341270	-0.43895875		26.00000000	1.32076923	11.64048431	0.575389
27	-0.04000870	8.80884360	-0.35243036		27.00000000	1.27185185	11.20354405	0.596904
28	-0.02986479	8.81476120	-0.26325097		28.00000000	1.22642857	10.81067499	0.618303
29	-0.02003869	8.80509190	-0.17644251		29.00000000	1.18413793	10.42644331	0.639652
30	-0.00989032	8.80532550	-0.08708745		30.00000000	1.14466667	10.07916259	0.661023
31	-0.00070431	8.80445960	-0.00620104		31.00000000	1.10774194	9.75306912	0.682623
32	0.00947363	8.81370830	0.08349782		32.00000000	1.07312500	9.45821072	0.703995
33	0.01931508	8.80692960	0.17010654		33.00000000	1.04060606	9.16454432	0.725346
34	0.02943860	8.80648040	0.25925047		34.00000000	1.01000000	8.89454520	0.746724
35	0.03926963	8.81925200	0.34632876		35.00000000	0.98114286	8.65294611	0.768208
36	0.04937901	8.80469800	0.43476730		36.00000000	0.95388889	8.39870359	0.789584
37	0.05922641	8.82044890	0.52240354		37.00000000	0.92810811	8.18633014	0.810952
38	0.06934919	8.79858880	0.61017502		38.00000000	0.90368421	7.95114577	0.832317
39	0.07952482	8.81193260	0.70076731		39.00000000	0.88051282	7.75901963	0.853798
40	0.08932681	8.81306270	0.78724281		40.00000000	0.85850000	7.56601433	0.875178
41	0.09944364	8.80125520	0.87522889		41.00000000	0.83756098	7.37158789	0.896549
42	0.10925606	8.80595780	0.96210425		42.00000000	0.81761905	7.19991883	0.917903
43	0.11943987	8.81423760	1.05277139		43.00000000	0.79860465	7.03909114	0.939377
44	0.12924783	8.80807110	1.13842408		44.00000000	0.78045455	6.87429913	0.960749
45	0.13943090	8.81061740	1.22847231		45.00000000	0.76311111	6.72348003	0.982132
46	0.14922248	8.80809400	1.31436563		46.00000000	0.74652174	6.57543365	1.003602
47	0.15938917	8.80386730	1.40324110		47.00000000	0.73063830	6.43244262	1.024978
48	0.16952534	8.80728630	1.49305820		48.00000000	0.71541667	6.30087941	1.046339
49	0.17934670	8.81445410	1.58084326		49.00000000	0.70081633	6.17731334	1.067714
50	0.18948212	8.79616550	1.66671609		50.00000000	0.68680000	6.04120647	1.089202
51	0.19930795	8.80333330	1.75457431		51.00000000	0.67333333	5.92757776	1.110592
52	0.20942923	8.80455300	1.84393076		52.00000000	0.66038462	5.81439135	1.131945
53	0.21925654	8.80514910	1.93058653		53.00000000	0.64792453	5.70507208	1.153324
54	0.22941728	8.80322460	2.01961184		54.00000000	0.63592593	5.59819875	1.174790
55	0.23921704	8.80013750	2.10514284		55.00000000	0.62436364	5.49448585	1.196157
56	0.24938597	8.81015870	2.19712997		56.00000000	0.61321429	5.40251517	1.217503
57	0.25953034	8.81065940	2.28663343		57.00000000	0.60245614	5.30803586	1.238874
58	0.26936358	8.80074790	2.37060096		58.00000000	0.59206897	5.21064970	1.260360
59	0.27949753	8.81547260	2.46390282		59.00000000	0.58203390	5.13090388	1.281744
60	0.28934494	8.80276870	2.54703658		60.00000000	0.57233333	5.03811795	1.303085
61	0.29948261	8.80602460	2.63725123		61.00000000	0.56295082	4.95735877	1.324457
62	0.30927494	8.79445460	2.71990442		62.00000000	0.55387097	4.87099308	1.345940
63	0.31943119	8.80722330	2.81330182		63.00000000	0.54507937	4.80063568	1.367328
64	0.32924956	8.79711630	2.89644667		64.00000000	0.53656250	4.72020271	1.388665
65	0.33937162	8.80232330	2.98725872		65.00000000	0.52830769	4.65033511	1.410049
66	0.34922272	8.80457500	3.07475763		66.00000000	0.52030303	4.58104705	1.431532
67	0.35938868	8.79963490	3.16248917		67.00000000	0.51253731	4.51014123	1.452918
68	0.36953974	8.81157400	3.25622676		68.00000000	0.50500000	4.44984487	1.474291
69	0.37937003	8.78874590	3.33418680		69.00000000	0.49768116	4.37399325	1.495647
70	0.38948983	8.80280210	3.42860189		70.00000000	0.49057143	4.31840320	1.517122
71	0.39932084	8.80291080	3.51518574		71.00000000	0.48366197	4.25763320	1.538494
72	0.40947264	8.80508040	3.60543952		72.00000000	0.47694444	4.19953418	1.559875
73	0.41928658	8.78560640	3.68368686		73.00000000	0.47041096	4.13284553	1.581225
74	0.42940339	8.80267720	3.77989943		74.00000000	0.46405405	4.08491804	1.602701
75	0.43921730	8.77130600	3.85250934		75.00000000	0.45786667	4.01608864	1.624132
76	0.44940707	8.79189490	3.95113973		76.00000000	0.45184211	3.97254830	1.645522
77	0.45952910	8.77283000	4.03137067		77.00000000	0.44597403	3.91245431	1.667009
78	0.46942264	8.74023720	4.10286522		78.00000000	0.44025641	3.84794545	1.688390
79	0.47955361	8.75873950	4.20028515		79.00000000	0.43468354	3.80727993	1.709748
80	0.48935860	8.71447180	4.26450172		80.00000000	0.42925000	3.74068702	1.731132
81	0.49948362	8.70674990	4.34887896		81.00000000	0.42395062	3.69123199	1.752607
82	0.50928932	8.64577670	4.40320174		82.00000000	0.41878049	3.62068258	1.773980
83	0.51943594	8.60844800	4.47153728		83.00000000	0.41373494	3.56161571	1.795325
84	0.52921635	8.50378320	4.50034111		84.00000000	0.40880952	3.47642756	1.816706
85	0.53935850	8.41265200	4.53743536		85.00000000	0.40400000	3.39871141	1.838191
86	0.54950356	8.24296860	4.52954059		86.00000000	0.39930233	3.29143653	1.859583
87	0.55932194	8.00578020	4.47780851		87.00000000	0.39471264	3.15998267	1.880933
88	0.56940824	7.68971820	4.37858891		88.00000000	0.39022727	3.00073776	1.902308
89	0.57923257	7.29567810	4.22589438		89.00000000	0.38584270	2.81498411	1.923788
90	0.58935612	6.71704960	3.95873429		90.00000000	0.38155556	2.56292759	1.945168
91	0.59915811	6.01248840	3.60243119		91.00000000	0.37736264	2.26888848	1.966515
92	0.60926896	5.07373240	3.09126766		92.00000000	0.37326087	1.89382577	1.987985
93	0.61907697	3.98022770	2.46406730		93.00000000	0.36924731	1.46968838	2.009494
94	0.62917668	2.59542890	1.63298334		94.00000000	0.36531915	0.94815988	2.030868
95	0.63921386	0.96109807	0.61434721		95.00000000	0.36147368	0.34741166	2.052224
96	0.64900839	-0.86919022	-0.56411175		96.00000000	0.35770833	-0.31091658	2.073598
97	0.65910739	-3.01988860	-1.99043089		97.00000000	0.35402062	-1.06910283	2.095121
98	0.66885352	-5.39240410	-3.60672846		98.00000000	0.35040816	-1.88954242	2.116520
99	0.67908347	-8.17760850	-5.55327876		99.00000000	0.34686869	-2.83655632	2.137897
100	0.68517381	-9.99700830	-6.84968827		100.00000000	0.34340000	-3.43297265	2.159257
101	0.68512022	-10.00017100	-6.85131936		101.00000000	0.34000000	-3.40005814	2.180726
