# Supplementary material for: Study on the Electrical Injection Regeneration of Industrialized B-Doped Czochralski Silicon PERC Solar Cells
Source: Hindawi journal article supplement (doi:10.1155/2019/5357370), 2019-06-20
Supplement: f1 [file 5357370.f1.zip › section3.2/IVRawData_1-10-8h.csv]

22:57 02/04/2018
Test Lot:	JK-PERC
Recipe:	Recipe_YJX-LID
Cell Name:	1-10-8h
Test Order:	2
Test Condition:	Light
1	-0.29986075	8.92336750	-2.67576767		1.00000000	34.34000000	306.42843995	0.000000
2	-0.29003304	8.92549990	-2.58868987		2.00000000	17.17000000	153.25083328	0.061819
3	-0.27989125	8.93780230	-2.50161266		3.00000000	11.44666667	102.30804366	0.083248
4	-0.27005014	8.92781160	-2.41095677		4.00000000	8.58500000	76.64526259	0.104757
5	-0.25992844	8.91631790	-2.31760460		5.00000000	6.86800000	61.23727134	0.126137
6	-0.24977024	8.93129060	-2.23077060		6.00000000	5.72333333	51.11675320	0.147487
7	-0.23994850	8.92666340	-2.14193949		7.00000000	4.90571429	43.79166017	0.168870
8	-0.22979181	8.92207720	-2.05022027		8.00000000	4.29250000	38.29801638	0.190355
9	-0.21996930	8.92398830	-1.96300346		9.00000000	3.81555556	34.04997314	0.211752
10	-0.20982081	8.92369080	-1.87237603		10.00000000	3.43400000	30.64395421	0.233104
11	-0.19998936	8.93358520	-1.78662199		11.00000000	3.12181818	27.88902871	0.254477
12	-0.18984756	8.91660980	-1.69279661		12.00000000	2.86166667	25.51636504	0.275949
13	-0.18004888	8.92330070	-1.60663030		13.00000000	2.64153846	23.57124200	0.297318
14	-0.16992420	8.92841720	-1.51715415		14.00000000	2.45285714	21.90013190	0.318701
15	-0.16007863	8.92740060	-1.42908606		15.00000000	2.28933333	20.43779577	0.340062
16	-0.14990184	8.91882800	-1.33694873		16.00000000	2.14625000	19.14203460	0.361542
17	-0.13976003	8.93380260	-1.24858852		17.00000000	2.02000000	18.04628125	0.382917
18	-0.12995167	8.92557530	-1.15989342		18.00000000	1.90777778	17.02801421	0.404312
19	-0.11981434	8.93109040	-1.07007270		19.00000000	1.80736842	16.14177075	0.425728
20	-0.10999184	8.93807790	-0.98311563		20.00000000	1.71700000	15.34667975	0.447207
21	-0.09985897	8.92352580	-0.89109409		21.00000000	1.63523810	14.59208933	0.468587
22	-0.09001637	8.92290500	-0.80320754		22.00000000	1.56090909	13.92784353	0.489972
23	-0.07987531	8.92926790	-0.71322807		23.00000000	1.49304348	13.33178520	0.511325
24	-0.07006323	8.91729070	-0.62477422		24.00000000	1.43083333	12.75915678	0.532821
25	-0.05993036	8.93372920	-0.53540162		25.00000000	1.37360000	12.27137043	0.554206
26	-0.04977367	8.92370610	-0.44416564		26.00000000	1.32076923	11.78615644	0.575579
27	-0.03992587	8.92011170	-0.35614318		27.00000000	1.27185185	11.34506058	0.596931
28	-0.02980118	8.92632580	-0.26601506		28.00000000	1.22642857	10.94750100	0.618405
29	-0.01995710	8.90919020	-0.17780157		29.00000000	1.18413793	10.54971005	0.639797
30	-0.00982795	8.92558860	-0.08772021		30.00000000	1.14466667	10.21682375	0.661184
31	-0.00067234	8.92356590	-0.00599966		31.00000000	1.10774194	9.88500816	0.682637
32	0.00948117	8.92091560	0.08458068		32.00000000	1.07312500	9.57325755	0.704110
33	0.01929297	8.92813490	0.17225020		33.00000000	1.04060606	9.29067129	0.725484
34	0.02943225	8.92159840	0.26258268		34.00000000	1.01000000	9.01081438	0.746869
35	0.03925447	8.92491050	0.35034261		35.00000000	0.98114286	8.75661219	0.768361
36	0.04942947	8.93266770	0.44153706		36.00000000	0.95388889	8.52077247	0.789735
37	0.05925021	8.92253780	0.52866220		37.00000000	0.92810811	8.28107968	0.811099
38	0.06938800	8.93278310	0.61982791		38.00000000	0.90368421	8.07241504	0.832481
39	0.07950123	8.92519760	0.70956416		39.00000000	0.88051282	7.85875091	0.853966
40	0.08931675	8.91646480	0.79638964		40.00000000	0.85850000	7.65478503	0.875349
41	0.09950069	8.93434810	0.88897376		41.00000000	0.83756098	7.48306131	0.896692
42	0.10932217	8.91660500	0.97478261		42.00000000	0.81761905	7.29038609	0.918058
43	0.11945996	8.92938800	1.06670433		43.00000000	0.79860465	7.13105079	0.939536
44	0.12926729	8.92913820	1.15424550		44.00000000	0.78045455	6.96878650	0.960968
45	0.13942146	8.92821690	1.24478504		45.00000000	0.76311111	6.81322152	0.982337
46	0.14924963	8.92776780	1.33246604		46.00000000	0.74652174	6.66477274	1.003724
47	0.15941869	8.92457200	1.42274358		47.00000000	0.73063830	6.52063410	1.025215
48	0.16955201	8.93199540	1.51443777		48.00000000	0.71541667	6.39009838	1.046593
49	0.17936680	8.92508790	1.60086446		49.00000000	0.70081633	6.25484732	1.067962
50	0.18951128	8.92895600	1.69213788		50.00000000	0.68680000	6.13240698	1.089338
51	0.19930969	8.92343240	1.77852655		51.00000000	0.67333333	6.00844448	1.110817
52	0.20946683	8.92766950	1.87005063		52.00000000	0.66038462	5.89569559	1.132202
53	0.21926895	8.92269610	1.95647021		53.00000000	0.64792453	5.78123366	1.153550
54	0.22941494	8.92175870	2.04678474		54.00000000	0.63592593	5.67357766	1.174928
55	0.23925948	8.91563700	2.13315067		55.00000000	0.62436364	5.56659954	1.196409
56	0.24939951	8.91982270	2.22459941		56.00000000	0.61321429	5.46976271	1.217782
57	0.25955442	8.92152120	2.31562026		57.00000000	0.60245614	5.37482523	1.239170
58	0.26938781	8.93097880	2.40589682		58.00000000	0.59206897	5.28775538	1.260534
59	0.27953303	8.92090700	2.49368816		59.00000000	0.58203390	5.19227028	1.282010
60	0.28934038	8.92070390	2.58111986		60.00000000	0.57233333	5.10561620	1.303385
61	0.29948190	8.93605230	2.67618592		61.00000000	0.56295082	5.03055797	1.324774
62	0.30932644	8.90737820	2.75528759		62.00000000	0.55387097	4.93353818	1.346128
63	0.31944636	8.92685320	2.85165076		63.00000000	0.54507937	4.86584347	1.367608
64	0.32926708	8.92004780	2.93707809		64.00000000	0.53656250	4.78616315	1.388987
65	0.33942127	8.91942020	3.02744093		65.00000000	0.52830769	4.71219830	1.410367
66	0.34922785	8.91798690	3.11440939		66.00000000	0.52030303	4.64005561	1.431858
67	0.35940883	8.93340490	3.21074460		67.00000000	0.51253731	4.57870335	1.453251
68	0.36954439	8.91727450	3.29532877		68.00000000	0.50500000	4.50322362	1.474621
69	0.37937030	8.91687200	3.38279641		69.00000000	0.49768116	4.43775920	1.496005
70	0.38950437	8.92062380	3.47462195		70.00000000	0.49057143	4.37620316	1.517494
71	0.39934745	8.91243270	3.55915727		71.00000000	0.48366197	4.31060477	1.538892
72	0.40946662	8.91783520	3.65155584		72.00000000	0.47694444	4.25331196	1.560239
73	0.41930673	8.90627190	3.73445975		73.00000000	0.47041096	4.18960790	1.581610
74	0.42944080	8.91109280	3.82678682		74.00000000	0.46405405	4.13522874	1.603096
75	0.43928981	8.91105460	3.91453548		75.00000000	0.45786667	4.08007487	1.624461
76	0.44943133	8.90337940	4.00145765		76.00000000	0.45184211	4.02292169	1.645806
77	0.45955944	8.90871810	4.09408550		77.00000000	0.44597403	3.97305688	1.667191
78	0.46940622	8.90862940	4.18176605		78.00000000	0.44025641	3.92208120	1.688666
79	0.47955590	8.87061020	4.25395346		79.00000000	0.43468354	3.85590828	1.710037
80	0.48936698	8.88784410	4.34941743		80.00000000	0.42925000	3.81510708	1.731393
81	0.49953675	8.84133720	4.41657285		81.00000000	0.42395062	3.74829036	1.752778
82	0.50936866	8.83128740	4.49838103		82.00000000	0.41878049	3.69837085	1.774262
83	0.51949531	8.79381180	4.56834399		83.00000000	0.41373494	3.63830720	1.795643
84	0.52927136	8.74342630	4.62764513		84.00000000	0.40880952	3.57439594	1.817006
85	0.53938609	8.66620450	4.67443016		85.00000000	0.40400000	3.50114662	1.838395
86	0.54955512	8.55041690	4.69892539		86.00000000	0.39930233	3.41420135	1.859880
87	0.55935949	8.41081430	4.70466880		87.00000000	0.39471264	3.31985475	1.881256
88	0.56946528	8.19281200	4.66552198		88.00000000	0.39022727	3.19705868	1.902623
89	0.57930237	7.90318630	4.57833455		89.00000000	0.38584270	3.04938671	1.923985
90	0.58939481	7.52106000	4.43287373		90.00000000	0.38155556	2.86970223	1.945462
91	0.59919322	7.01067210	4.20074719		91.00000000	0.37736264	2.64556571	1.966847
92	0.60932356	6.34397360	3.86553258		92.00000000	0.37326087	2.36795710	1.988354
93	0.61911899	5.51752520	3.41600463		93.00000000	0.36924731	2.03733135	2.009737
94	0.62923592	4.46039720	2.80664214		94.00000000	0.36531915	1.62946851	2.031233
95	0.63936776	3.14964890	2.01378396		95.00000000	0.36147368	1.13851519	2.052604
96	0.64913189	1.64468510	1.06761755		96.00000000	0.35770833	0.58831757	2.074013
97	0.65918708	-0.20392816	-0.13442681		97.00000000	0.35402062	-0.07219477	2.095500
98	0.66894382	-2.29438970	-1.53481781		98.00000000	0.35040816	-0.80397288	2.116879
99	0.67899454	-4.82028010	-3.27294387		99.00000000	0.34686869	-1.67200423	2.138245
100	0.68889642	-7.65413050	-5.27290310		100.00000000	0.34340000	-2.62842841	2.159621
101	0.69609058	-9.99594310	-6.95808183		101.00000000	0.34000000	-3.39862065	2.181097
22:57 02/04/2018
Test Lot:	JK-PERC
Recipe:	Recipe_YJX-LID
Cell Name:	1-10-8h
Test Order:	3
Test Condition:	Light
1	-0.29983097	8.93115900	-2.67783807		1.00000000	34.34000000	306.69600006	0.000000
2	-0.28999880	8.90682600	-2.58296885		2.00000000	17.17000000	152.93020242	0.021498
3	-0.27987412	8.94112870	-2.50239053		3.00000000	11.44666667	102.34611985	0.042891
4	-0.27006352	8.91200920	-2.40680857		4.00000000	8.58500000	76.50959898	0.064263
5	-0.25990906	8.92794800	-2.32045457		5.00000000	6.86800000	61.31714686	0.085761
6	-0.24974494	8.92386150	-2.22868925		6.00000000	5.72333333	51.07423399	0.107200
7	-0.23989862	8.91939070	-2.13974952		7.00000000	4.90571429	43.75598238	0.128608
8	-0.22974342	8.92112260	-2.04956922		8.00000000	4.29250000	38.29391876	0.149988
9	-0.21992390	8.94374560	-1.96694341		9.00000000	3.81555556	34.12535821	0.171480
10	-0.20976944	8.91057870	-1.86916710		10.00000000	3.43400000	30.59892726	0.192856
11	-0.19994470	8.92441370	-1.78438922		11.00000000	3.12181818	27.86039695	0.214195
12	-0.18980514	8.92556480	-1.69411808		12.00000000	2.86166667	25.54199127	0.235571
13	-0.18001986	8.92669010	-1.60698150		13.00000000	2.64153846	23.58019523	0.257054
14	-0.16987582	8.92760280	-1.51658385		14.00000000	2.45285714	21.89813430	0.278437
15	-0.16006002	8.93010430	-1.42935267		15.00000000	2.28933333	20.44398544	0.299794
16	-0.14990333	8.92816160	-1.33836115		16.00000000	2.14625000	19.16206683	0.321168
17	-0.13975409	8.92192840	-1.24687598		17.00000000	2.02000000	18.02229537	0.342644
18	-0.12994647	8.92404460	-1.15964809		18.00000000	1.90777778	17.02509398	0.364013
19	-0.11977415	8.92376800	-1.06883673		19.00000000	1.80736842	16.12853648	0.385349
20	-0.10997324	8.92558190	-0.98157516		20.00000000	1.71700000	15.32522412	0.406724
21	-0.09979793	8.93144800	-0.89134006		21.00000000	1.63523810	14.60504402	0.428189
22	-0.09001042	8.92138770	-0.80301784		22.00000000	1.56090909	13.92547516	0.449562
23	-0.07985894	8.91947560	-0.71229983		23.00000000	1.49304348	13.31716487	0.470916
24	-0.07007217	8.92650990	-0.62549989		24.00000000	1.43083333	12.77234792	0.492284
25	-0.05993334	8.91704080	-0.53442802		25.00000000	1.37360000	12.24844724	0.513767
26	-0.04976697	8.93279460	-0.44455815		26.00000000	1.32076923	11.79816025	0.535159
27	-0.03994894	8.91466240	-0.35613131		27.00000000	1.27185185	11.33812988	0.556540
28	-0.02979225	8.93590350	-0.26622068		28.00000000	1.22642857	10.95924736	0.577885
29	-0.01997198	8.92698380	-0.17828958		29.00000000	1.18413793	10.57078013	0.599363
30	-0.00982720	8.92596910	-0.08771731		30.00000000	1.14466667	10.21725930	0.620746
31	-0.00063438	8.91698550	-0.00565675		31.00000000	1.10774194	9.87771878	0.642253
32	0.00951540	8.93056300	0.08497790		32.00000000	1.07312500	9.58361042	0.663713
33	0.01934879	8.92473700	0.17268284		33.00000000	1.04060606	9.28713541	0.685183
34	0.02948881	8.91783810	0.26297646		34.00000000	1.01000000	9.00701648	0.706572
35	0.03929912	8.93051820	0.35096153		35.00000000	0.98114286	8.76211414	0.727942
36	0.04943617	8.92491910	0.44121383		36.00000000	0.95388889	8.51338116	0.749282
37	0.05926807	8.92548660	0.52899636		37.00000000	0.92810811	8.28381648	0.770761
38	0.06943116	8.93002220	0.62002183		38.00000000	0.90368421	8.06992006	0.792149
39	0.07956598	8.91236780	0.70912128		39.00000000	0.88051282	7.84745411	0.813505
40	0.08936662	8.92803670	0.79786842		40.00000000	0.85850000	7.66471951	0.834888
41	0.09954088	8.91324710	0.88723248		41.00000000	0.83756098	7.46538794	0.856370
42	0.10936236	8.92636780	0.97620865		42.00000000	0.81761905	7.29836834	0.877763
43	0.11951131	8.93190190	1.06746330		43.00000000	0.79860465	7.13305840	0.899143
44	0.12932833	8.92594050	1.15437698		44.00000000	0.78045455	6.96629084	0.920494
45	0.13948621	8.92295170	1.24462871		45.00000000	0.76311111	6.80920359	0.941968
46	0.14932033	8.91905310	1.33179595		46.00000000	0.74652174	6.65826703	0.963327
47	0.15945366	8.91876790	1.42213018		47.00000000	0.73063830	6.51639340	0.984708
48	0.16959667	8.93358900	1.51510695		48.00000000	0.71541667	6.39123846	1.006205
49	0.17939061	8.92183020	1.60049256		49.00000000	0.70081633	6.25256427	1.027582
50	0.18955296	8.93121720	1.69293866		50.00000000	0.68680000	6.13395997	1.048946
51	0.19933127	8.92303370	1.77863964		51.00000000	0.67333333	6.00817602	1.070327
52	0.20945938	8.92639450	1.86971706		52.00000000	0.66038462	5.89485360	1.091820
53	0.21930096	8.91849610	1.95583476		53.00000000	0.64792453	5.77851238	1.113198
54	0.22943950	8.93162630	2.04926787		54.00000000	0.63592593	5.67985272	1.134553
55	0.23929669	8.91960050	2.13443088		55.00000000	0.62436364	5.56907420	1.155936
56	0.24940993	8.92459870	2.22588354		56.00000000	0.61321429	5.47269142	1.177420
57	0.25957897	8.91187380	2.31333502		57.00000000	0.60245614	5.36901309	1.198803
58	0.26934239	8.92802520	2.40469565		58.00000000	0.59206897	5.28600664	1.220146
59	0.27951965	8.92810150	2.49557981		59.00000000	0.58203390	5.19645772	1.241522
60	0.28933963	8.92536160	2.58246082		60.00000000	0.57233333	5.10828196	1.263004
61	0.29950199	8.91611770	2.67039499		61.00000000	0.56295082	5.01933577	1.284377
62	0.30932420	8.91750810	2.75840106		62.00000000	0.55387097	4.93914884	1.305742
63	0.31946051	8.92514610	2.85123172		63.00000000	0.54507937	4.86491297	1.327114
64	0.32928646	8.91400150	2.93526000		64.00000000	0.53656250	4.78291893	1.348590
65	0.33942351	8.92834850	3.03049139		65.00000000	0.52830769	4.71691519	1.369979
66	0.34925315	8.91213890	3.11259258		66.00000000	0.52030303	4.63701288	1.391323
67	0.35937235	8.92420670	3.20711313		67.00000000	0.51253731	4.57398893	1.412695
68	0.36955181	8.91639330	3.29506928		68.00000000	0.50500000	4.50277862	1.434186
69	0.37936288	8.91858960	3.38338184		69.00000000	0.49768116	4.43861401	1.455562
70	0.38950661	8.91364480	3.47192357		70.00000000	0.49057143	4.37277946	1.476969
71	0.39935416	8.91796490	3.56142638		71.00000000	0.48366197	4.31328049	1.498328
72	0.40948749	8.91425700	3.65027672		72.00000000	0.47694444	4.25160535	1.519809
73	0.41934019	8.91594120	3.73881248		73.00000000	0.47041096	4.19415645	1.541202
74	0.42946982	8.90810200	3.82576096		74.00000000	0.46405405	4.13384085	1.562585
75	0.43928087	8.90086460	3.90997955		75.00000000	0.45786667	4.07540920	1.583924
76	0.44947076	8.91596600	4.00746601		76.00000000	0.45184211	4.02860885	1.605404
77	0.45959145	8.89589790	4.08847861		77.00000000	0.44597403	3.96733940	1.626774
78	0.46944863	8.90190790	4.17898847		78.00000000	0.44025641	3.91912202	1.648149
79	0.47959536	8.87787440	4.25778737		79.00000000	0.43468354	3.85906591	1.669639
80	0.48941237	8.90026570	4.35590013		80.00000000	0.42925000	3.82043905	1.691005
81	0.49953306	8.84601970	4.41887929		81.00000000	0.42395062	3.75027551	1.712355
82	0.50935525	8.82785130	4.49651241		82.00000000	0.41878049	3.69693187	1.733740
83	0.51949155	8.79232030	4.56753610		83.00000000	0.41373494	3.63769011	1.755208
84	0.52926987	8.73293590	4.62207985		84.00000000	0.40880952	3.57010737	1.776587
85	0.53939801	8.67308810	4.67824646		85.00000000	0.40400000	3.50392759	1.797946
86	0.54956555	8.57068350	4.71015239		86.00000000	0.39930233	3.42229385	1.819313
87	0.55937141	8.41041180	4.70454391		87.00000000	0.39471264	3.31969588	1.840802
88	0.56948763	8.20312020	4.67157548		88.00000000	0.39022727	3.20108122	1.862170
89	0.57928008	7.92244720	4.58931585		89.00000000	0.38584270	3.05681839	1.883515
90	0.58942902	7.53230480	4.43975904		90.00000000	0.38155556	2.87399274	1.904895
91	0.59915745	7.03721860	4.21640195		91.00000000	0.37736264	2.65558337	1.926375
92	0.60930270	6.37981410	3.88723796		92.00000000	0.37326087	2.38133496	1.947758
93	0.61909884	5.55175160	3.43708298		93.00000000	0.36924731	2.04996935	1.969114
94	0.62921882	4.48859550	2.82430876		94.00000000	0.36531915	1.63976989	1.990595
95	0.63935810	3.17574410	2.03043771		95.00000000	0.36147368	1.14794792	2.012097
96	0.64915353	1.65119230	1.07187731		96.00000000	0.35770833	0.59064525	2.033494
97	0.65920496	-0.21597612	-0.14237253		97.00000000	0.35402062	-0.07646000	2.054860
98	0.66900635	-2.35931370	-1.57839585		98.00000000	0.35040816	-0.82672278	2.076233
99	0.67901909	-4.94936280	-3.36071182		99.00000000	0.34686869	-1.71677898	2.097755
100	0.68894327	-7.89731500	-5.44080202		100.00000000	0.34340000	-2.71193797	2.119142
101	0.69520783	-9.99748800	-6.95033194		101.00000000	0.34000000	-3.39914592	2.140517
22:57 02/04/2018
Test Lot:	JK-PERC
Recipe:	Recipe_YJX-LID
Cell Name:	1-10-8h
Test Order:	4
Test Condition:	Light
1	-0.29980156	8.92282010	-2.67507539		1.00000000	34.34000000	306.40964223	0.000000
2	-0.28997901	8.92665000	-2.58854113		2.00000000	17.17000000	153.27058050	0.061717
3	-0.27985281	8.92661290	-2.49813770		3.00000000	11.44666667	102.17996233	0.083237
4	-0.27003697	8.92358400	-2.40969758		4.00000000	8.58500000	76.60896864	0.104636
5	-0.25989288	8.92202570	-2.31877095		5.00000000	6.86800000	61.27647251	0.125997
6	-0.24975552	8.92385290	-2.22878152		6.00000000	5.72333333	51.07418476	0.147377
7	-0.23990023	8.92057040	-2.14004689		7.00000000	4.90571429	43.76176965	0.168855
8	-0.22979710	8.92161180	-2.05016052		8.00000000	4.29250000	38.29601865	0.190227
9	-0.21995150	8.93059160	-1.96429702		9.00000000	3.81555556	34.07516839	0.211579
10	-0.20982751	8.92150310	-1.87197678		10.00000000	3.43400000	30.63644165	0.232949
11	-0.20000125	8.91875650	-1.78376245		11.00000000	3.12181818	27.84273620	0.254426
12	-0.18981178	8.91248510	-1.69169466		12.00000000	2.86166667	25.50456153	0.275798
13	-0.18003242	8.92027850	-1.60593933		13.00000000	2.64153846	23.56325875	0.297160
14	-0.16986825	8.93387890	-1.51758237		14.00000000	2.45285714	21.91352867	0.318534
15	-0.16005018	8.92320540	-1.42816063		15.00000000	2.28933333	20.42819156	0.340023
16	-0.14993216	8.92069050	-1.33749840		16.00000000	2.14625000	19.14603199	0.361405
17	-0.13975459	8.93198200	-1.24828548		17.00000000	2.02000000	18.04260364	0.382752
18	-0.12993875	8.92470550	-1.15966508		18.00000000	1.90777778	17.02635483	0.404124
19	-0.11978203	8.91711430	-1.06811005		19.00000000	1.80736842	16.11651079	0.425608
20	-0.10998704	8.92673020	-0.98182463		20.00000000	1.71700000	15.32719575	0.446978
21	-0.09981244	8.91541000	-0.88986883		21.00000000	1.63523810	14.57881807	0.468371
22	-0.09000926	8.92459870	-0.80329650		22.00000000	1.56090909	13.93048724	0.489721
23	-0.07986370	8.92599580	-0.71286302		23.00000000	1.49304348	13.32689982	0.511196
24	-0.07003521	8.91427230	-0.62431295		24.00000000	1.43083333	12.75483795	0.532574
25	-0.05988742	8.91766170	-0.53405572		25.00000000	1.37360000	12.24930011	0.553962
26	-0.04973143	8.93297290	-0.44424954		26.00000000	1.32076923	11.79839575	0.575354
27	-0.03990667	8.92156980	-0.35603011		27.00000000	1.27185185	11.34691507	0.596820
28	-0.02979981	8.91880130	-0.26577857		28.00000000	1.22642857	10.93827274	0.618184
29	-0.01995718	8.93420980	-0.17830161		29.00000000	1.18413793	10.57933671	0.639530
30	-0.00980492	8.90155220	-0.08727898		30.00000000	1.14466667	10.18931008	0.660897
31	-0.00063960	8.92528440	-0.00570861		31.00000000	1.10774194	9.88691182	0.682500
32	0.00950575	8.91388130	0.08473316		32.00000000	1.07312500	9.56570887	0.703894
33	0.01933396	8.92612550	0.17257737		33.00000000	1.04060606	9.28858029	0.725268
34	0.02945467	8.91342930	0.26254215		34.00000000	1.01000000	9.00256359	0.746630
35	0.03928735	8.92251780	0.35054205		35.00000000	0.98114286	8.75426461	0.768108
36	0.04942518	8.92957690	0.44134592		36.00000000	0.95388889	8.51782419	0.789480
37	0.05927869	8.91921520	0.52871942		37.00000000	0.92810811	8.27799595	0.810859
38	0.06941876	8.91870780	0.61912562		38.00000000	0.90368421	8.05969542	0.832219
39	0.07954319	8.91331390	0.70899340		39.00000000	0.88051282	7.84828716	0.853686
40	0.08937289	8.92730710	0.79785922		40.00000000	0.85850000	7.66409315	0.875056
41	0.09951965	8.92070870	0.88778579		41.00000000	0.83756098	7.47163748	0.896449
42	0.10934413	8.92983250	0.97642477		42.00000000	0.81761905	7.30120114	0.917926
43	0.11949611	8.90914540	1.06460822		43.00000000	0.79860465	7.11488495	0.939304
44	0.12934069	8.93226240	1.15530498		44.00000000	0.78045455	6.97122479	0.960668
45	0.13948075	8.91965100	1.24411961		45.00000000	0.76311111	6.80668479	0.982048
46	0.14928365	8.91608140	1.33102518		46.00000000	0.74652174	6.65604859	1.003533
47	0.15945572	8.91442200	1.42145558		47.00000000	0.73063830	6.51321812	1.024930
48	0.16959652	8.92279820	1.51327552		48.00000000	0.71541667	6.38351855	1.046273
49	0.17940092	8.92648790	1.60142014		49.00000000	0.70081633	6.25582846	1.067650
50	0.18955885	8.92510600	1.69183283		50.00000000	0.68680000	6.12976280	1.089166
51	0.19935133	8.92006780	1.77822738		51.00000000	0.67333333	6.00617899	1.110536
52	0.20949437	8.92820360	1.87040839		52.00000000	0.66038462	5.89604830	1.131898
53	0.21931587	8.93290810	1.95912851		53.00000000	0.64792453	5.78785027	1.153275
54	0.22945668	8.91371150	2.04531065		54.00000000	0.63592593	5.66846024	1.174745
55	0.23927149	8.93155770	2.13706712		55.00000000	0.62436364	5.57653984	1.196142
56	0.24942569	8.91387840	2.22335027		56.00000000	0.61321429	5.46611758	1.217493
57	0.25960743	8.92920020	2.31808672		57.00000000	0.60245614	5.37945149	1.238861
58	0.26937312	8.92942520	2.40534713		58.00000000	0.59206897	5.28683554	1.260348
59	0.27955115	8.91440580	2.49203239		59.00000000	0.58203390	5.18848636	1.281726
60	0.28935108	8.92723080	2.58310387		60.00000000	0.57233333	5.10935176	1.303079
61	0.29948667	8.91329570	2.66941325		61.00000000	0.56295082	5.01774712	1.324459
62	0.30929852	8.91731260	2.75811159		62.00000000	0.55387097	4.93904056	1.345939
63	0.31945643	8.91571900	2.84818376		63.00000000	0.54507937	4.85977445	1.367373
64	0.32927644	8.92540840	2.93892670		64.00000000	0.53656250	4.78903944	1.388738
65	0.33942097	8.91943070	3.02744182		65.00000000	0.52830769	4.71220385	1.410097
66	0.34924993	8.92622570	3.11748370		66.00000000	0.52030303	4.64434228	1.431567
67	0.35940713	8.91697030	3.20482270		67.00000000	0.51253731	4.57028000	1.452940
68	0.36954421	8.92495250	3.29816452		68.00000000	0.50500000	4.50710101	1.474318
69	0.37940219	8.91732410	3.38325229		69.00000000	0.49768116	4.43798420	1.495671
70	0.38950875	8.91634850	3.47299576		70.00000000	0.49057143	4.37410582	1.517156
71	0.39934143	8.91010000	3.55817208		71.00000000	0.48366197	4.30947654	1.538530
72	0.40951350	8.92346100	3.65427775		72.00000000	0.47694444	4.25599515	1.559924
73	0.41932756	8.90380860	3.73361233		73.00000000	0.47041096	4.18844914	1.581401
74	0.42947134	8.91402340	3.82831757		74.00000000	0.46405405	4.13658870	1.602788
75	0.43928170	8.90490820	3.91176321		75.00000000	0.45786667	4.07726063	1.624155
76	0.44944260	8.91368100	4.00618796		76.00000000	0.45184211	4.02757639	1.645530
77	0.45959458	8.89589020	4.08850292		77.00000000	0.44597403	3.96733597	1.667003
78	0.46945477	8.88729860	4.17218472		78.00000000	0.44025641	3.91269018	1.688385
79	0.47960302	8.88960840	4.26348304		79.00000000	0.43468354	3.86416649	1.709740
80	0.48942676	8.86766620	4.34007314		80.00000000	0.42925000	3.80644572	1.731122
81	0.49954450	8.85324290	4.42258880		81.00000000	0.42395062	3.75333779	1.752601
82	0.50936377	8.82216070	4.49368903		82.00000000	0.41878049	3.69454876	1.773963
83	0.51952022	8.79112720	4.56716834		83.00000000	0.41373494	3.63719648	1.795328
84	0.52930450	8.74282460	4.62761640		84.00000000	0.40880952	3.57414996	1.816702
85	0.53940290	8.66477110	4.67380266		85.00000000	0.40400000	3.50056752	1.838183
86	0.54956752	8.56547070	4.70730449		86.00000000	0.39930233	3.42021237	1.859567
87	0.55938977	8.40515610	4.70175834		87.00000000	0.39471264	3.31762138	1.880913
88	0.56951195	8.21348000	4.67767501		88.00000000	0.39022727	3.20512390	1.902282
89	0.57929778	7.93181610	4.59488346		89.00000000	0.38584270	3.06043331	1.923769
90	0.58942592	7.54071380	4.44469217		90.00000000	0.38155556	2.87720124	1.945134
91	0.59923702	7.05209590	4.22587693		91.00000000	0.37736264	2.66119751	1.966480
92	0.60932350	6.38131710	3.88828647		92.00000000	0.37326087	2.38189597	1.987996
93	0.61913157	5.55998040	3.44235939		93.00000000	0.36924731	2.05300782	2.009512
94	0.62923741	4.49557300	2.82878271		94.00000000	0.36531915	1.64231890	2.030917
95	0.63934696	3.18991590	2.03946303		95.00000000	0.36147368	1.15307065	2.052275
96	0.64910001	1.65211060	1.07238501		96.00000000	0.35770833	0.59097373	2.073631
97	0.65919018	-0.22767299	-0.15007980		97.00000000	0.35402062	-0.08060093	2.095118
98	0.66895068	-2.37958980	-1.59182821		98.00000000	0.35040816	-0.83382769	2.116487
99	0.67900884	-4.97577760	-3.37859698		99.00000000	0.34686869	-1.72594144	2.137869
100	0.68894202	-7.94834180	-5.47594666		100.00000000	0.34340000	-2.72946057	2.159224
101	0.69501758	-9.99784850	-6.94868047		101.00000000	0.34000000	-3.39926849	2.180693
