# Supplementary material for: Study on the Electrical Injection Regeneration of Industrialized B-Doped Czochralski Silicon PERC Solar Cells
Source: Hindawi journal article supplement (doi:10.1155/2019/5357370), 2019-06-20
Supplement: f1 [file 5357370.f1.zip › section3.2/IVRawData_1-10-9h.csv]

23:52 02/04/2018
Test Lot:	JK-PERC
Recipe:	Recipe_YJX-LID
Cell Name:	1-10-9h
Test Order:	2
Test Condition:	Light
1	-0.29974270	8.92944530	-2.67653604		1.00000000	34.34000000	306.63715160	0.000000
2	-0.28997281	8.94843580	-2.59480307		2.00000000	17.17000000	153.64464269	0.061786
3	-0.27990666	8.93276790	-2.50034123		3.00000000	11.44666667	102.25041656	0.083203
4	-0.26999384	8.93584630	-2.41262346		4.00000000	8.58500000	76.71424049	0.104695
5	-0.25977439	8.94689080	-2.32417310		5.00000000	6.86800000	61.44724601	0.126125
6	-0.24967995	8.94865800	-2.23430048		6.00000000	5.72333333	51.21615262	0.147482
7	-0.23986463	8.94019890	-2.14443750		7.00000000	4.90571429	43.85806146	0.168868
8	-0.22974417	8.95034690	-2.05629002		8.00000000	4.29250000	38.41936407	0.190356
9	-0.21990429	8.94386480	-1.96679424		9.00000000	3.81555556	34.12581303	0.211752
10	-0.20981880	8.94553090	-1.87694056		10.00000000	3.43400000	30.71895311	0.233098
11	-0.19998935	8.93662550	-1.78722992		11.00000000	3.12181818	27.89851997	0.254466
12	-0.18976839	8.93225380	-1.69505942		12.00000000	2.86166667	25.56113296	0.275947
13	-0.17993669	8.93481830	-1.60770163		13.00000000	2.64153846	23.60166619	0.297316
14	-0.16982217	8.93798070	-1.51786728		14.00000000	2.45285714	21.92358980	0.318664
15	-0.16013043	8.93466000	-1.43071095		15.00000000	2.28933333	20.45441496	0.340039
16	-0.14986034	8.94645980	-1.34071951		16.00000000	2.14625000	19.20133935	0.361505
17	-0.13978824	8.92249580	-1.24725998		17.00000000	2.02000000	18.02344152	0.382896
18	-0.12987022	8.93836780	-1.16082779		18.00000000	1.90777778	17.05241946	0.404266
19	-0.11979440	8.93950080	-1.07090213		19.00000000	1.80736842	16.15697145	0.425634
20	-0.10994931	8.93066980	-0.98192098		20.00000000	1.71700000	15.33396005	0.447113
21	-0.09981023	8.95660500	-0.89396079		21.00000000	1.63523810	14.64618170	0.468497
22	-0.08998748	8.93740840	-0.80425485		22.00000000	1.56090909	13.95048202	0.489880
23	-0.07976279	8.93152430	-0.71240333		23.00000000	1.49304348	13.33515411	0.511237
24	-0.07001224	8.94415190	-0.62620013		24.00000000	1.43083333	12.79759068	0.532724
25	-0.05982403	8.94359300	-0.53504178		25.00000000	1.37360000	12.28491934	0.554094
26	-0.04970355	8.93198300	-0.44395129		26.00000000	1.32076923	11.79708832	0.575478
27	-0.03987038	8.94810200	-0.35676424		27.00000000	1.27185185	11.38066010	0.596967
28	-0.02975958	8.92851730	-0.26570890		28.00000000	1.22642857	10.95018872	0.618349
29	-0.01993980	8.94372460	-0.17833611		29.00000000	1.18413793	10.59060354	0.639707
30	-0.00980965	8.93034080	-0.08760351		30.00000000	1.14466667	10.22226344	0.661081
31	-0.00062403	8.95377450	-0.00558744		31.00000000	1.10774194	9.91847149	0.682674
32	0.00954908	8.93601320	0.08533073		32.00000000	1.07312500	9.58945917	0.704060
33	0.01940877	8.93494220	0.17341624		33.00000000	1.04060606	9.29775500	0.725410
34	0.02961604	8.93858810	0.26472561		34.00000000	1.01000000	9.02797398	0.746791
35	0.03934994	8.93793390	0.35170719		35.00000000	0.98114286	8.76939000	0.768269
36	0.04947460	8.93621060	0.44211542		36.00000000	0.95388889	8.52415200	0.789633
37	0.05934471	8.94370840	0.53076174		37.00000000	0.92810811	8.30072828	0.810999
38	0.06944108	8.93596360	0.62052296		38.00000000	0.90368421	8.07528921	0.832375
39	0.07959030	8.93935110	0.71148562		39.00000000	0.88051282	7.87121325	0.853847
40	0.08942095	8.93482020	0.79896013		40.00000000	0.85850000	7.67054314	0.875255
41	0.09952775	8.92888070	0.88867137		41.00000000	0.83756098	7.47848203	0.896600
42	0.10938520	8.93866830	0.97775802		42.00000000	0.81761905	7.30842546	0.917962
43	0.11949795	8.93476490	1.06768609		43.00000000	0.79860465	7.13534481	0.939442
44	0.12932041	8.93852520	1.15593374		44.00000000	0.78045455	6.97611262	0.960810
45	0.13951875	8.93642520	1.24679887		45.00000000	0.76311111	6.81948536	0.982153
46	0.14926010	8.95146180	1.33609608		46.00000000	0.74652174	6.68246083	1.003527
47	0.15951575	8.91905020	1.42272898		47.00000000	0.73063830	6.51659966	1.025006
48	0.16965157	8.94984910	1.51835595		48.00000000	0.71541667	6.40287121	1.046375
49	0.17941004	8.92700670	1.60159463		49.00000000	0.70081633	6.25619204	1.067753
50	0.18956298	8.93666550	1.69406094		50.00000000	0.68680000	6.13770187	1.089107
51	0.19937131	8.94619460	1.78361454		51.00000000	0.67333333	6.02377103	1.110570
52	0.20957114	8.93022730	1.87151792		52.00000000	0.66038462	5.89738472	1.131960
53	0.21927378	8.93881230	1.96004716		53.00000000	0.64792453	5.79167574	1.153337
54	0.22946244	8.93799110	2.05093325		54.00000000	0.63592593	5.68390027	1.174686
55	0.23929012	8.93674560	2.13847493		55.00000000	0.62436364	5.57977898	1.196163
56	0.24944083	8.93557640	2.22889759		56.00000000	0.61321429	5.47942310	1.217535
57	0.25965777	8.93480870	2.31999250		57.00000000	0.60245614	5.38283036	1.238930
58	0.26948547	8.92481900	2.40510904		58.00000000	0.59206897	5.28410835	1.260407
59	0.27957812	8.93049430	2.49677081		59.00000000	0.58203390	5.19785041	1.281784
60	0.28932393	8.93120190	2.58401043		60.00000000	0.57233333	5.11162455	1.303130
61	0.29949844	8.93539430	2.67613665		61.00000000	0.56295082	5.03018755	1.324497
62	0.30938047	8.93856330	2.76541691		62.00000000	0.55387097	4.95081071	1.345983
63	0.31951255	8.92680640	2.85222668		63.00000000	0.54507937	4.86581796	1.367395
64	0.32933578	8.93757060	2.94346178		64.00000000	0.53656250	4.79556523	1.388747
65	0.33951923	8.92481040	3.03014475		65.00000000	0.52830769	4.71504599	1.410164
66	0.34937668	8.93127920	3.12038068		66.00000000	0.52030303	4.64697163	1.431661
67	0.35945743	8.94611640	3.21574801		67.00000000	0.51253731	4.58521847	1.453037
68	0.36961928	8.93303110	3.30182052		68.00000000	0.50500000	4.51118071	1.474395
69	0.37946856	8.93823430	3.39177890		69.00000000	0.49768116	4.44839081	1.495772
70	0.38962299	8.93706610	3.48208642		70.00000000	0.49057143	4.38426928	1.517248
71	0.39938518	8.93883230	3.57003715		71.00000000	0.48366197	4.32337326	1.538640
72	0.40955746	8.93609330	3.65984367		72.00000000	0.47694444	4.26202005	1.559981
73	0.41943428	8.91959760	3.74118500		73.00000000	0.47041096	4.19587646	1.581347
74	0.42947632	8.93173120	3.83596705		74.00000000	0.46405405	4.14480607	1.602835
75	0.43931219	8.92353920	3.92021955		75.00000000	0.45786667	4.08579115	1.624223
76	0.44946736	8.91221430	4.00574943		76.00000000	0.45184211	4.02691367	1.645570
77	0.45954213	8.90358830	4.09157393		77.00000000	0.44597403	3.97076912	1.666950
78	0.46952164	8.91653540	4.18650632		78.00000000	0.44025641	3.92556187	1.688418
79	0.47962844	8.89489560	4.26624490		79.00000000	0.43468354	3.86646475	1.709795
80	0.48945761	8.88296700	4.34783580		80.00000000	0.42925000	3.81301358	1.731167
81	0.49958450	8.86412620	4.42838006		81.00000000	0.42395062	3.75795177	1.752536
82	0.50944567	8.84370990	4.50538972		82.00000000	0.41878049	3.70357315	1.774027
83	0.51954800	8.79940030	4.57171083		83.00000000	0.41373494	3.64061935	1.795391
84	0.52931762	8.74395560	4.62832977		84.00000000	0.40880952	3.57461233	1.816770
85	0.53950405	8.67153640	4.67832901		85.00000000	0.40400000	3.50330071	1.838124
86	0.54960269	8.56030560	4.70476698		86.00000000	0.39930233	3.41814993	1.859600
87	0.55939686	8.40464590	4.70153253		87.00000000	0.39471264	3.31742000	1.880995
88	0.56952745	8.19888210	4.66948842		88.00000000	0.39022727	3.19942740	1.902378
89	0.57940054	7.90239670	4.57865292		89.00000000	0.38584270	3.04908205	1.923848
90	0.58946866	7.52098800	4.43338672		90.00000000	0.38155556	2.86967475	1.945215
91	0.59927100	7.00943850	4.20055322		91.00000000	0.37736264	2.64510020	1.966577
92	0.60945076	6.32349060	3.85385615		92.00000000	0.37326087	2.36031160	1.988046
93	0.61917347	5.49685340	3.40350579		93.00000000	0.36924731	2.02969834	2.009549
94	0.62929368	4.45473340	2.80333557		94.00000000	0.36531915	1.62739941	2.030939
95	0.63940269	3.14985750	2.01402736		95.00000000	0.36147368	1.13859060	2.052284
96	0.64917010	1.63360710	1.06048888		96.00000000	0.35770833	0.58435487	2.073665
97	0.65926498	-0.21981612	-0.14491707		97.00000000	0.35402062	-0.07781944	2.095148
98	0.66909862	-2.32582950	-1.55620931		98.00000000	0.35040816	-0.81498964	2.116568
99	0.67903197	-4.84497590	-3.28989353		99.00000000	0.34686869	-1.68057043	2.137954
100	0.68899292	-7.71298360	-5.31419109		100.00000000	0.34340000	-2.64863857	2.159325
101	0.69602650	-9.99595830	-6.95745187		101.00000000	0.34000000	-3.39862582	2.180815
23:52 02/04/2018
Test Lot:	JK-PERC
Recipe:	Recipe_YJX-LID
Cell Name:	1-10-9h
Test Order:	3
Test Condition:	Light
1	-0.29973987	8.93870830	-2.67928726		1.00000000	34.34000000	306.95524302	0.000000
2	-0.28998131	8.94609450	-2.59420020		2.00000000	17.17000000	153.60444257	0.061809
3	-0.27980965	8.93220040	-2.49931587		3.00000000	11.44666667	102.24392058	0.083230
4	-0.27003324	8.94099140	-2.41436488		4.00000000	8.58500000	76.75841117	0.104721
5	-0.25989881	8.94105530	-2.32376963		5.00000000	6.86800000	61.40716780	0.126108
6	-0.24969593	8.92509460	-2.22855980		6.00000000	5.72333333	51.08129143	0.147461
7	-0.23983689	8.94770340	-2.14598936		7.00000000	4.90571429	43.89487639	0.168829
8	-0.22970842	8.94906520	-2.05567563		8.00000000	4.29250000	38.41386237	0.190311
9	-0.21990149	8.94346140	-1.96668049		9.00000000	3.81555556	34.12427383	0.211686
10	-0.20975590	8.93099020	-1.87332789		10.00000000	3.43400000	30.66902035	0.233053
11	-0.19995642	8.94725130	-1.78906034		11.00000000	3.12181818	27.93169179	0.254411
12	-0.18980785	8.93236730	-1.69543343		12.00000000	2.86166667	25.56145776	0.275889
13	-0.18003367	8.93609520	-1.60879801		13.00000000	2.64153846	23.60503917	0.297269
14	-0.16987543	8.94101330	-1.51885848		14.00000000	2.45285714	21.93102834	0.318651
15	-0.15999481	8.93048950	-1.42883197		15.00000000	2.28933333	20.44486730	0.339990
16	-0.14991173	8.93546580	-1.33953114		16.00000000	2.14625000	19.17774347	0.361454
17	-0.13970065	8.94151020	-1.24913479		17.00000000	2.02000000	18.06185060	0.382830
18	-0.12992051	8.92932320	-1.16010222		18.00000000	1.90777778	17.03516437	0.404215
19	-0.11975929	8.95180420	-1.07206172		19.00000000	1.80736842	16.17920822	0.425704
20	-0.10995013	8.92043970	-0.98080350		20.00000000	1.71700000	15.31639496	0.447085
21	-0.09977551	8.94760510	-0.89275184		21.00000000	1.63523810	14.63146472	0.468425
22	-0.08995295	8.94065760	-0.80423849		22.00000000	1.56090909	13.95555373	0.489810
23	-0.07984606	8.93338490	-0.71329560		23.00000000	1.49304348	13.33793206	0.511289
24	-0.07001978	8.93434140	-0.62558064		24.00000000	1.43083333	12.78355349	0.532677
25	-0.05986228	8.93694500	-0.53498592		25.00000000	1.37360000	12.27578765	0.554027
26	-0.04973232	8.94201090	-0.44470695		26.00000000	1.32076923	11.81033286	0.575400
27	-0.03988371	8.93891050	-0.35651691		27.00000000	1.27185185	11.36896987	0.596866
28	-0.02976417	8.93648910	-0.26598718		28.00000000	1.22642857	10.95996556	0.618240
29	-0.01989100	8.93458180	-0.17771773		29.00000000	1.18413793	10.57977721	0.639591
30	-0.00979602	8.93151760	-0.08749331		30.00000000	1.14466667	10.22361048	0.660973
31	-0.00059495	8.93491170	-0.00531582		31.00000000	1.10774194	9.89757638	0.682565
32	0.00955043	8.93326000	0.08531647		32.00000000	1.07312500	9.58650464	0.703943
33	0.01935113	8.92900940	0.17278640		33.00000000	1.04060606	9.29158130	0.725299
34	0.02949866	8.94380000	0.26383012		34.00000000	1.01000000	9.03323800	0.746667
35	0.03931127	8.93247890	0.35114706		35.00000000	0.98114286	8.76403787	0.768142
36	0.04944912	8.93889240	0.44202039		36.00000000	0.95388889	8.52671014	0.789525
37	0.05926992	8.93129250	0.52935699		37.00000000	0.92810811	8.28920499	0.810881
38	0.06938991	8.93633080	0.62009119		38.00000000	0.90368421	8.07562104	0.832247
39	0.07962453	8.93067840	0.71110103		39.00000000	0.88051282	7.86357683	0.853725
40	0.08940215	8.93204020	0.79854363		40.00000000	0.85850000	7.66815651	0.875105
41	0.09958764	8.93637080	0.88995210		41.00000000	0.83756098	7.48475545	0.896496
42	0.10934815	8.92943670	0.97641738		42.00000000	0.81761905	7.30087753	0.917865
43	0.11951355	8.93221380	1.06752058		43.00000000	0.79860465	7.13330749	0.939343
44	0.12926809	8.93475340	1.15497851		44.00000000	0.78045455	6.97316890	0.960722
45	0.13946475	8.94364640	1.24732341		45.00000000	0.76311111	6.82499594	0.982103
46	0.14928554	8.93658070	1.33410228		46.00000000	0.74652174	6.67135177	1.003446
47	0.15946136	8.93249230	1.42438737		47.00000000	0.73063830	6.52642097	1.024920
48	0.16965802	8.93960000	1.51667484		48.00000000	0.71541667	6.39553883	1.046286
49	0.17942448	8.93909740	1.60389290		49.00000000	0.70081633	6.26466540	1.067662
50	0.18963751	8.93659780	1.69471415		50.00000000	0.68680000	6.13765537	1.089136
51	0.19936602	8.93179320	1.78069606		51.00000000	0.67333333	6.01407409	1.110514
52	0.20952918	8.93631080	1.87241787		52.00000000	0.66038462	5.90140217	1.131860
53	0.21929489	8.93346690	1.95906364		53.00000000	0.64792453	5.78821233	1.153238
54	0.22947219	8.92617030	2.04830785		54.00000000	0.63592593	5.67638311	1.174719
55	0.23932797	8.93343830	2.13802165		55.00000000	0.62436364	5.57771402	1.196108
56	0.24941298	8.92959500	2.22715690		56.00000000	0.61321429	5.47575522	1.217462
57	0.25958136	8.92861080	2.31770093		57.00000000	0.60245614	5.37909640	1.238836
58	0.26940215	8.92642400	2.40479782		58.00000000	0.59206897	5.28505862	1.260311
59	0.27959731	8.92325880	2.49491916		59.00000000	0.58203390	5.19363910	1.281686
60	0.28939131	8.93887900	2.58683390		60.00000000	0.57233333	5.11601841	1.303027
61	0.29954332	8.93686290	2.67697758		61.00000000	0.56295082	5.03101429	1.324406
62	0.30935293	8.92519470	2.76103513		62.00000000	0.55387097	4.94340623	1.345897
63	0.31950718	8.93732360	2.85553906		63.00000000	0.54507937	4.87155067	1.367270
64	0.32932127	8.93159770	2.94136510		64.00000000	0.53656250	4.79236039	1.388622
65	0.33945096	8.92540170	3.02973618		65.00000000	0.52830769	4.71535838	1.410000
66	0.34927174	8.94027040	3.12258380		66.00000000	0.52030303	4.65164978	1.431477
67	0.35940737	8.92699810	3.20842891		67.00000000	0.51253731	4.57541962	1.452860
68	0.36966357	8.92557330	3.29945929		68.00000000	0.50500000	4.50741452	1.474208
69	0.37940249	8.92984870	3.38800683		69.00000000	0.49768116	4.44421745	1.495587
70	0.38960880	8.93897720	3.48270418		70.00000000	0.49057143	4.38520681	1.517078
71	0.39934400	8.92190840	3.56291059		71.00000000	0.48366197	4.31518781	1.538454
72	0.40948114	8.93802070	3.65995091		72.00000000	0.47694444	4.26293932	1.559828
73	0.41934732	8.91986270	3.74052052		73.00000000	0.47041096	4.19600117	1.581188
74	0.42945689	8.92351060	3.83226311		74.00000000	0.46405405	4.14099127	1.602679
75	0.43930596	8.91346740	3.91573935		75.00000000	0.45786667	4.08117961	1.624070
76	0.44946393	8.91495800	4.00695206		76.00000000	0.45184211	4.02815339	1.645453
77	0.45964718	8.91515830	4.09782737		77.00000000	0.44597403	3.97592904	1.666800
78	0.46946797	8.90175060	4.17908678		78.00000000	0.44025641	3.91905276	1.688270
79	0.47961402	8.89241220	4.26492556		79.00000000	0.43468354	3.86538525	1.709642
80	0.48942736	8.88603690	4.34906958		80.00000000	0.42925000	3.81433134	1.731020
81	0.49954513	8.85570620	4.42382490		81.00000000	0.42395062	3.75438211	1.752506
82	0.50936520	8.84051320	4.50304977		82.00000000	0.41878049	3.70223443	1.773900
83	0.51953876	8.79902460	4.57143433		83.00000000	0.41373494	3.64046391	1.795258
84	0.52932233	8.74547290	4.62917409		84.00000000	0.40880952	3.57523261	1.816628
85	0.53941780	8.65841200	4.67050155		85.00000000	0.40400000	3.49799845	1.838113
86	0.54961669	8.56899640	4.70966344		86.00000000	0.39930233	3.42162019	1.859489
87	0.55940843	8.41948600	4.70993144		87.00000000	0.39471264	3.32327758	1.880838
88	0.56949121	8.21215530	4.67675026		88.00000000	0.39022727	3.20460697	1.902220
89	0.57934403	7.91625210	4.58623339		89.00000000	0.38584270	3.05442806	1.923712
90	0.58946323	7.52991680	4.43860908		90.00000000	0.38155556	2.87308159	1.945081
91	0.59925950	7.04115250	4.21947753		91.00000000	0.37736264	2.65706788	1.966422
92	0.60933185	6.36121990	3.87609389		92.00000000	0.37326087	2.37439447	1.987908
93	0.61912215	5.55162100	3.43713153		93.00000000	0.36924731	2.04992113	2.009466
94	0.62926519	4.48615880	2.82298357		94.00000000	0.36531915	1.63887971	2.030859
95	0.63943058	3.17292070	2.02886252		95.00000000	0.36147368	1.14692734	2.052218
96	0.64915907	1.64745090	1.06945769		96.00000000	0.35770833	0.58930692	2.073599
97	0.65920246	-0.22716214	-0.14974584		97.00000000	0.35402062	-0.08042008	2.095080
98	0.66902995	-2.36066220	-1.57935371		98.00000000	0.35040816	-0.82719531	2.116452
99	0.67902339	-4.94417910	-3.35721325		99.00000000	0.34686869	-1.71498091	2.137860
100	0.68896103	-7.87715820	-5.42705503		100.00000000	0.34340000	-2.70501613	2.159257
101	0.69531494	-9.99720570	-6.95120648		101.00000000	0.34000000	-3.39904994	2.180742
23:52 02/04/2018
Test Lot:	JK-PERC
Recipe:	Recipe_YJX-LID
Cell Name:	1-10-9h
Test Order:	4
Test Condition:	Light
1	-0.29978806	8.94058610	-2.68028096		1.00000000	34.34000000	307.01972667	0.000000
2	-0.28993943	8.92954830	-2.58902814		2.00000000	17.17000000	153.32034431	0.061722
3	-0.27976850	8.93663790	-2.50018978		3.00000000	11.44666667	102.29471516	0.083237
4	-0.26994964	8.93653580	-2.41241462		4.00000000	8.58500000	76.72015984	0.104621
5	-0.25980031	8.93094350	-2.32026189		5.00000000	6.86800000	61.33771996	0.125978
6	-0.24969268	8.94470120	-2.23342641		6.00000000	5.72333333	51.19350653	0.147409
7	-0.23979194	8.94198320	-2.14421550		7.00000000	4.90571429	43.86681473	0.168915
8	-0.22970290	8.93296430	-2.05192781		8.00000000	4.29250000	38.34474926	0.190310
9	-0.21990637	8.94423770	-1.96689485		9.00000000	3.81555556	34.12723585	0.211664
10	-0.20974736	8.93496230	-1.87408475		10.00000000	3.43400000	30.68266054	0.233039
11	-0.19988608	8.93356230	-1.78569475		11.00000000	3.12181818	27.88895722	0.254526
12	-0.18975537	8.94671540	-1.69768729		12.00000000	2.86166667	25.60251724	0.275897
13	-0.17998339	8.94319630	-1.60962679		13.00000000	2.64153846	23.62379700	0.297242
14	-0.16977452	8.93167780	-1.51637131		14.00000000	2.45285714	21.90812969	0.318624
15	-0.16002116	8.93605330	-1.42995761		15.00000000	2.28933333	20.45760469	0.340113
16	-0.14984280	8.93626210	-1.33903453		16.00000000	2.14625000	19.17945253	0.361480
17	-0.13970239	8.93280600	-1.24793435		17.00000000	2.02000000	18.04426812	0.382853
18	-0.12988280	8.93059830	-1.15993111		18.00000000	1.90777778	17.03759698	0.404230
19	-0.11978631	8.93341350	-1.07010064		19.00000000	1.80736842	16.14596945	0.425702
20	-0.10992726	8.95265480	-0.98414081		20.00000000	1.71700000	15.37170829	0.447077
21	-0.09981068	8.93367860	-0.89167655		21.00000000	1.63523810	14.60869158	0.468460
22	-0.08995386	8.94239520	-0.80440298		22.00000000	1.56090909	13.95826596	0.489817
23	-0.07980975	8.93781280	-0.71332459		23.00000000	1.49304348	13.34454311	0.511295
24	-0.06999237	8.93301960	-0.62524322		24.00000000	1.43083333	12.78166221	0.532671
25	-0.05986314	8.93945790	-0.53514401		25.00000000	1.37360000	12.27923937	0.554065
26	-0.04971232	8.93518540	-0.44418882		26.00000000	1.32076923	11.80131795	0.575544
27	-0.03989570	8.93452640	-0.35644914		27.00000000	1.27185185	11.36339395	0.596923
28	-0.02970171	8.93081190	-0.26526037		28.00000000	1.22642857	10.95300288	0.618280
29	-0.01992751	8.94442750	-0.17824014		29.00000000	1.18413793	10.59143587	0.639659
30	-0.00976478	8.93176940	-0.08721677		30.00000000	1.14466667	10.22389871	0.661155
31	-0.00057411	8.93707660	-0.00513090		31.00000000	1.10774194	9.89997453	0.682650
32	0.00957947	8.93178270	0.08556176		32.00000000	1.07312500	9.58491931	0.704011
33	0.01939582	8.93298630	0.17326257		33.00000000	1.04060606	9.29571968	0.725394
34	0.02955602	8.94491200	0.26437601		34.00000000	1.01000000	9.03436112	0.746877
35	0.03934930	8.93808270	0.35170725		35.00000000	0.98114286	8.76953600	0.768257
36	0.04949983	8.93706990	0.44238340		36.00000000	0.95388889	8.52497168	0.789632
37	0.05936232	8.93063640	0.53014325		37.00000000	0.92810811	8.28859605	0.811012
38	0.06949870	8.93820480	0.62119364		38.00000000	0.90368421	8.07731455	0.832493
39	0.07961649	8.93614860	0.71146476		39.00000000	0.88051282	7.86839341	0.853872
40	0.08945516	8.93372540	0.79916782		40.00000000	0.85850000	7.66960326	0.875219
41	0.09958783	8.93897250	0.89021286		41.00000000	0.83756098	7.48693453	0.896593
42	0.10942055	8.93703170	0.97789492		42.00000000	0.81761905	7.30708735	0.918096
43	0.11957405	8.92625430	1.06734838		43.00000000	0.79860465	7.12854820	0.939482
44	0.12935914	8.93283940	1.15554442		44.00000000	0.78045455	6.97167511	0.960826
45	0.13952380	8.93515590	1.24666690		45.00000000	0.76311111	6.81851675	0.982209
46	0.14935653	8.94272900	1.33565497		46.00000000	0.74652174	6.67594161	1.003690
47	0.15949887	8.92350860	1.42328954		47.00000000	0.73063830	6.51985713	1.025084
48	0.16969256	8.93560790	1.51630618		48.00000000	0.71541667	6.39268282	1.046459
49	0.17948957	8.93695830	1.60409080		49.00000000	0.70081633	6.26316629	1.067814
50	0.18965274	8.94320770	1.69610384		50.00000000	0.68680000	6.14219505	1.089277
51	0.19940062	8.93404960	1.78145503		51.00000000	0.67333333	6.01559340	1.110645
52	0.20954594	8.93797780	1.87291696		52.00000000	0.66038462	5.90250303	1.132024
53	0.21936600	8.92616270	1.95809661		53.00000000	0.64792453	5.78347976	1.153387
54	0.22949049	8.93504050	2.05050682		54.00000000	0.63592593	5.68202390	1.174862
55	0.23929715	8.93206020	2.13741655		55.00000000	0.62436364	5.57685359	1.196237
56	0.24948564	8.93469330	2.22907768		56.00000000	0.61321429	5.47888157	1.217622
57	0.25963169	8.92660810	2.31763035		57.00000000	0.60245614	5.37788986	1.239143
58	0.26943988	8.93595980	2.40770394		58.00000000	0.59206897	5.29070447	1.260534
59	0.27960303	8.93076990	2.49707032		59.00000000	0.58203390	5.19801082	1.281897
60	0.28940600	8.94027900	2.58737038		60.00000000	0.57233333	5.11681968	1.303274
61	0.29956621	8.90799240	2.66853352		61.00000000	0.56295082	5.01476162	1.324753
62	0.30936468	8.94550230	2.76742246		62.00000000	0.55387097	4.95465402	1.346127
63	0.31952563	8.93247220	2.85415381		63.00000000	0.54507937	4.86890628	1.367469
64	0.32936653	8.92651080	2.94009389		64.00000000	0.53656250	4.78963095	1.388848
65	0.33949623	8.92581840	3.03028170		65.00000000	0.52830769	4.71557852	1.410338
66	0.34931034	8.93630410	3.12154342		66.00000000	0.52030303	4.64958610	1.431715
67	0.35947725	8.93233680	3.21097187		67.00000000	0.51253731	4.57815591	1.453083
68	0.36963895	8.93249420	3.30179778		68.00000000	0.50500000	4.51090957	1.474454
69	0.37945750	8.93139270	3.38908395		69.00000000	0.49768116	4.44498587	1.495934
70	0.38959166	8.92574210	3.47739468		70.00000000	0.49057143	4.37871405	1.517324
71	0.39944300	8.93289090	3.56818074		71.00000000	0.48366197	4.32049963	1.538677
72	0.40958458	8.92687510	3.65631039		72.00000000	0.47694444	4.25762349	1.560052
73	0.41943890	8.92386910	3.74301784		73.00000000	0.47041096	4.19788582	1.581535
74	0.42952690	8.92170330	3.83211156		74.00000000	0.46405405	4.14015259	1.602910
75	0.43934324	8.91851900	3.91829103		75.00000000	0.45786667	4.08349257	1.624263
76	0.44946328	8.91805360	4.00833762		76.00000000	0.45184211	4.02955211	1.645636
77	0.45964581	8.91765310	4.09896188		77.00000000	0.44597403	3.97704166	1.667119
78	0.46951649	8.89995670	4.17867643		78.00000000	0.44025641	3.91826299	1.688507
79	0.47968933	8.89340310	4.26607057		79.00000000	0.43468354	3.86581598	1.709870
80	0.48948485	8.88539120	4.34926438		80.00000000	0.42925000	3.81405417	1.731229
81	0.49956763	8.85457800	4.42346055		81.00000000	0.42395062	3.75390381	1.752690
82	0.50943536	8.83406450	4.50038483		82.00000000	0.41878049	3.69953384	1.774066
83	0.51957250	8.80047990	4.57248734		83.00000000	0.41373494	3.64106602	1.795446
84	0.52935684	8.74622730	4.62987525		84.00000000	0.40880952	3.57554102	1.816801
85	0.53941280	8.66708370	4.67513589		85.00000000	0.40400000	3.50150181	1.838275
86	0.54960281	8.56686210	4.70837148		86.00000000	0.39930233	3.42076796	1.859644
87	0.55943704	8.42383190	4.71260358		87.00000000	0.39471264	3.32499296	1.881031
88	0.56953245	8.19765660	4.66883145		88.00000000	0.39022727	3.19894918	1.902504
89	0.57935178	7.92408750	4.59083420		89.00000000	0.38584270	3.05745129	1.923881
90	0.58948445	7.53104690	4.43943504		90.00000000	0.38155556	2.87351278	1.945238
91	0.59927475	7.03680560	4.21697992		91.00000000	0.37736264	2.65542752	1.966608
92	0.60942602	6.36587240	3.87952828		92.00000000	0.37326087	2.37613107	1.988165
93	0.61917168	5.53978970	3.43008090		93.00000000	0.36924731	2.04555245	2.009542
94	0.62929165	4.47896290	2.81857395		94.00000000	0.36531915	1.63625091	2.030889
95	0.63945115	3.16286470	2.02249747		95.00000000	0.36147368	1.14329236	2.052273
96	0.64917594	1.64843500	1.07012434		96.00000000	0.35770833	0.58965894	2.073762
97	0.65922672	-0.23972653	-0.15803413		97.00000000	0.35402062	-0.08486813	2.095144
98	0.66903043	-2.37582640	-1.58950016		98.00000000	0.35040816	-0.83250897	2.116496
99	0.67909312	-4.96989870	-3.37502401		99.00000000	0.34686869	-1.72390224	2.137868
100	0.68896234	-7.89722820	-5.44089282		100.00000000	0.34340000	-2.71190816	2.159385
101	0.69525522	-9.99705220	-6.95050273		101.00000000	0.34000000	-3.39899775	2.180772
