# Supplementary material for: Study on the Electrical Injection Regeneration of Industrialized B-Doped Czochralski Silicon PERC Solar Cells
Source: Hindawi journal article supplement (doi:10.1155/2019/5357370), 2019-06-20
Supplement: f1 [file 5357370.f1.zip › section3.2/IVRawData_1-10-10min.csv]

12:22 02/04/2018
Test Lot:	JK-PERC
Recipe:	Recipe_YJX-LID
Cell Name:	1-10-10min
Test Order:	2
Test Condition:	Light
1	-0.29992491	8.92261980	-2.67611594		1.00000000	34.34000000	306.40276393	0.000000
2	-0.29008210	8.92836570	-2.58995907		2.00000000	17.17000000	153.30003907	0.061784
3	-0.27994451	8.92577930	-2.49872291		3.00000000	11.44666667	102.17042039	0.083207
4	-0.27010691	8.92101100	-2.40962672		4.00000000	8.58500000	76.58687944	0.104695
5	-0.25995743	8.92958740	-2.32131259		5.00000000	6.86800000	61.32840626	0.126066
6	-0.24982284	8.91984840	-2.22838186		6.00000000	5.72333333	51.05126568	0.147438
7	-0.23998821	8.92260650	-2.14132036		7.00000000	4.90571429	43.77175817	0.168809
8	-0.22982533	8.92683410	-2.05161259		8.00000000	4.29250000	38.31843537	0.190295
9	-0.22000486	8.91721440	-1.96183051		9.00000000	3.81555556	34.02412694	0.211689
10	-0.20988739	8.91325760	-1.87078037		10.00000000	3.43400000	30.60812660	0.233045
11	-0.20006689	8.91399860	-1.78339598		11.00000000	3.12181818	27.82788290	0.254417
12	-0.18992338	8.92682080	-1.69541198		12.00000000	2.86166667	25.54558552	0.275907
13	-0.18014307	8.91528420	-1.60602667		13.00000000	2.64153846	23.55006611	0.297282
14	-0.16999806	8.92391200	-1.51704773		14.00000000	2.45285714	21.88908129	0.318675
15	-0.16014482	8.91868690	-1.42828151		15.00000000	2.28933333	20.41784721	0.340024
16	-0.14999683	8.91450600	-1.33714764		16.00000000	2.14625000	19.13275850	0.361504
17	-0.13987862	8.93099780	-1.24925565		17.00000000	2.02000000	18.04061556	0.382884
18	-0.13005367	8.91120050	-1.15893433		18.00000000	1.90777778	17.00059029	0.404261
19	-0.11987963	8.92983440	-1.07050524		19.00000000	1.80736842	16.13950070	0.425728
20	-0.11008370	8.92192270	-0.98215826		20.00000000	1.71700000	15.31894128	0.447114
21	-0.09991413	8.91301060	-0.89053566		21.00000000	1.63523810	14.57489448	0.468457
22	-0.09009736	8.91945080	-0.80361897		22.00000000	1.56090909	13.92245184	0.489815
23	-0.07995607	8.91240220	-0.71260065		23.00000000	1.49304348	13.30660398	0.511297
24	-0.07014154	8.92665390	-0.62612924		24.00000000	1.43083333	12.77255396	0.532664
25	-0.05999727	8.91545390	-0.53490288		25.00000000	1.37360000	12.24626748	0.554007
26	-0.04983068	8.92656710	-0.44481686		26.00000000	1.32076923	11.78993516	0.575395
27	-0.03998935	8.91999820	-0.35670489		27.00000000	1.27185185	11.34491623	0.596879
28	-0.02986890	8.92520330	-0.26658596		28.00000000	1.22642857	10.94612433	0.618262
29	-0.02003501	8.92074970	-0.17872729		29.00000000	1.18413793	10.56339809	0.639621
30	-0.00990340	8.92635350	-0.08840121		30.00000000	1.14466667	10.21769931	0.660998
31	-0.00066422	8.92119310	-0.00592560		31.00000000	1.10774194	9.88237971	0.682587
32	0.00946347	8.91518400	0.08436855		32.00000000	1.07312500	9.56710683	0.703967
33	0.01929038	8.92472460	0.17216129		33.00000000	1.04060606	9.28712251	0.725315
34	0.02944701	8.91999150	0.26266704		34.00000000	1.01000000	9.00919142	0.746697
35	0.03925680	8.92804050	0.35048626		35.00000000	0.98114286	8.75968316	0.768185
36	0.04940896	8.91771510	0.44061500		36.00000000	0.95388889	8.50650935	0.789555
37	0.05925373	8.92736150	0.52897947		37.00000000	0.92810811	8.28555659	0.810917
38	0.06937984	8.91695790	0.61865715		38.00000000	0.90368421	8.05811406	0.832289
39	0.07952978	8.92650510	0.70992296		39.00000000	0.88051282	7.85990218	0.853762
40	0.08936040	8.91564460	0.79670558		40.00000000	0.85850000	7.65408089	0.875139
41	0.09949248	8.92476940	0.88794740		41.00000000	0.83756098	7.47503857	0.896505
42	0.10930970	8.92362980	0.97543930		42.00000000	0.81761905	7.29612970	0.917908
43	0.11945517	8.92000870	1.06554116		43.00000000	0.79860465	7.12356044	0.939391
44	0.12927836	8.91479970	1.15249068		44.00000000	0.78045455	6.95759595	0.960778
45	0.13940001	8.93304540	1.24526662		45.00000000	0.76311111	6.81690620	0.982170
46	0.14923882	8.90919590	1.32959788		46.00000000	0.74652174	6.65090842	1.003522
47	0.15940289	8.92351630	1.42243429		47.00000000	0.73063830	6.51986276	1.024991
48	0.16952232	8.92234990	1.51253745		48.00000000	0.71541667	6.38319782	1.046386
49	0.17937526	8.90816500	1.59790441		49.00000000	0.70081633	6.24298747	1.067764
50	0.18947384	8.92134190	1.69036091		50.00000000	0.68680000	6.12717762	1.089253
51	0.19926949	8.90936280	1.77536418		51.00000000	0.67333333	5.99897095	1.110636
52	0.20943803	8.92403030	1.86903133		52.00000000	0.66038462	5.89329232	1.131981
53	0.21924782	8.91360190	1.95428778		53.00000000	0.64792453	5.77534131	1.153353
54	0.22939031	8.91011910	2.04389498		54.00000000	0.63592593	5.66617574	1.174843
55	0.23925294	8.91912560	2.13392702		55.00000000	0.62436364	5.56877769	1.196233
56	0.24938650	8.92865470	2.22668595		56.00000000	0.61321429	5.47517861	1.217573
57	0.25949773	8.91474340	2.31335568		57.00000000	0.60245614	5.37074190	1.238950
58	0.26932836	8.91382030	2.40074460		58.00000000	0.59206897	5.27759636	1.260443
59	0.27952445	8.92399220	2.49447401		59.00000000	0.58203390	5.19406597	1.281833
60	0.28932008	8.91547780	2.57942675		60.00000000	0.57233333	5.10262513	1.303180
61	0.29949531	8.92343810	2.67252786		61.00000000	0.56295082	5.02345679	1.324548
62	0.30930510	8.90834330	2.75539602		62.00000000	0.55387097	4.93407272	1.346017
63	0.31944686	8.91543100	2.84800644		63.00000000	0.54507937	4.85961747	1.367397
64	0.32928863	8.92488960	2.93886467		64.00000000	0.53656250	4.78876108	1.388736
65	0.33941549	8.90397930	3.02214850		65.00000000	0.52830769	4.70404076	1.410112
66	0.34926102	8.92924880	3.11863854		66.00000000	0.52030303	4.64591521	1.431588
67	0.35939607	8.90201190	3.19934809		67.00000000	0.51253731	4.56261326	1.452963
68	0.36954451	8.92521190	3.29826306		68.00000000	0.50500000	4.50723201	1.474324
69	0.37938631	8.91511730	3.38227346		69.00000000	0.49768116	4.43688591	1.495698
70	0.38952282	8.92279050	3.47563052		70.00000000	0.49057143	4.37726608	1.517171
71	0.39934453	8.90440460	3.55592527		71.00000000	0.48366197	4.30672189	1.538552
72	0.40947586	8.92102810	3.65294565		72.00000000	0.47694444	4.25483479	1.559911
73	0.41930500	8.91394040	3.73765978		73.00000000	0.47041096	4.19321525	1.581291
74	0.42942962	8.90349200	3.82342319		74.00000000	0.46405405	4.13170156	1.602774
75	0.43927068	8.91927240	3.91797485		75.00000000	0.45786667	4.08383752	1.624141
76	0.44944218	8.90255740	4.00118481		76.00000000	0.45184211	4.02255028	1.645542
77	0.45956311	8.90653420	4.09311456		77.00000000	0.44597403	3.97208291	1.666892
78	0.46942350	8.89576150	4.17587950		78.00000000	0.44025641	3.91641602	1.688375
79	0.47956300	8.88062190	4.25881768		79.00000000	0.43468354	3.86026020	1.709769
80	0.48934600	8.87806420	4.34444520		80.00000000	0.42925000	3.81090906	1.731152
81	0.49948996	8.85303500	4.42200210		81.00000000	0.42395062	3.75324965	1.752632
82	0.50930798	8.83067890	4.49753523		82.00000000	0.41878049	3.69811602	1.774024
83	0.51946682	8.80834010	4.57564042		83.00000000	0.41373494	3.64431806	1.795372
84	0.52923942	8.73568250	4.62326754		84.00000000	0.40880952	3.57123020	1.816743
85	0.53938115	8.67531680	4.67930235		85.00000000	0.40400000	3.50482799	1.838235
86	0.54952508	8.55089380	4.69893060		86.00000000	0.39930233	3.41439178	1.859617
87	0.55933189	8.41760540	4.70823514		87.00000000	0.39471264	3.32253528	1.880971
88	0.56948632	8.18234160	4.65973161		88.00000000	0.39022727	3.19297285	1.902349
89	0.57928497	7.91178560	4.58317848		89.00000000	0.38584270	3.05270469	1.923827
90	0.58937085	7.50624750	4.42396347		90.00000000	0.38155556	2.86405044	1.945215
91	0.59915757	6.98361250	4.18428430		91.00000000	0.37736264	2.63535443	1.966567
92	0.60932165	6.30362130	3.84093293		92.00000000	0.37326087	2.35289517	1.988044
93	0.61909348	5.46460680	3.38310244		93.00000000	0.36924731	2.01779137	2.009588
94	0.62925386	4.39928390	2.76826638		94.00000000	0.36531915	1.60714265	2.030972
95	0.63932264	3.06720570	1.96093405		95.00000000	0.36147368	1.10871414	2.052317
96	0.64911455	1.54321960	1.00172630		96.00000000	0.35770833	0.55202251	2.073709
97	0.65923250	-0.32466185	-0.21402764		97.00000000	0.35402062	-0.11493699	2.095202
98	0.66894704	-2.43846080	-1.63120113		98.00000000	0.35040816	-0.85445657	2.116575
99	0.67903739	-5.01192280	-3.40328298		99.00000000	0.34686869	-1.73847908	2.137927
100	0.68893427	-7.92128230	-5.45724284		100.00000000	0.34340000	-2.72016834	2.159306
101	0.69519454	-9.99734780	-6.95010161		101.00000000	0.34000000	-3.39909825	2.180778
12:23 02/04/2018
Test Lot:	JK-PERC
Recipe:	Recipe_YJX-LID
Cell Name:	1-10-10min
Test Order:	3
Test Condition:	Light
1	-0.29988921	8.91336060	-2.67302067		1.00000000	34.34000000	306.08480300	0.000000
2	-0.29005381	8.90865140	-2.58398828		2.00000000	17.17000000	152.96154454	0.061764
3	-0.27992967	8.92221070	-2.49759150		3.00000000	11.44666667	102.12957181	0.083300
4	-0.27010620	8.91512780	-2.40803129		4.00000000	8.58500000	76.53637216	0.104699
5	-0.25994629	8.92210870	-2.31926906		5.00000000	6.86800000	61.27704255	0.126066
6	-0.24979904	8.92156120	-2.22859742		6.00000000	5.72333333	51.06106860	0.147439
7	-0.24001354	8.91778280	-2.14038862		7.00000000	4.90571429	43.74809448	0.168930
8	-0.22985514	8.92190170	-2.05074496		8.00000000	4.29250000	38.29726305	0.190310
9	-0.22000040	8.91888810	-1.96215895		9.00000000	3.81555556	34.03051304	0.211653
10	-0.20985688	8.91272350	-1.87039635		10.00000000	3.43400000	30.60629250	0.233039
11	-0.20005202	8.91388800	-1.78324130		11.00000000	3.12181818	27.82753763	0.254521
12	-0.18990849	8.93046280	-1.69597071		12.00000000	2.86166667	25.55600771	0.275903
13	-0.18010959	8.92348580	-1.60720537		13.00000000	2.64153846	23.57173095	0.297265
14	-0.16997798	8.90972610	-1.51445724		14.00000000	2.45285714	21.85428531	0.318633
15	-0.16015080	8.92257790	-1.42895799		15.00000000	2.28933333	20.42675501	0.340130
16	-0.15003034	8.92272950	-1.33868014		16.00000000	2.14625000	19.15040819	0.361499
17	-0.13987565	8.92018990	-1.24771736		17.00000000	2.02000000	18.01878360	0.382852
18	-0.13002464	8.92747880	-1.16079222		18.00000000	1.90777778	17.03164567	0.404231
19	-0.11989080	8.91478060	-1.06880018		19.00000000	1.80736842	16.11229294	0.425699
20	-0.11006138	8.91769600	-0.98149393		20.00000000	1.71700000	15.31168403	0.447070
21	-0.09990669	8.92155270	-0.89132280		21.00000000	1.63523810	14.58886284	0.468420
22	-0.09008099	8.91350560	-0.80293742		22.00000000	1.56090909	13.91317192	0.489791
23	-0.07996576	8.93143750	-0.71420914		23.00000000	1.49304348	13.33502451	0.511267
24	-0.07010656	8.92398450	-0.62562985		24.00000000	1.43083333	12.76873449	0.532646
25	-0.05997792	8.91734600	-0.53484389		25.00000000	1.37360000	12.24886647	0.553993
26	-0.04982919	8.91365910	-0.44416040		26.00000000	1.32076923	11.77288667	0.575372
27	-0.04003029	8.92216010	-0.35715662		27.00000000	1.27185185	11.34766585	0.596846
28	-0.02984210	8.90922550	-0.26587003		28.00000000	1.22642857	10.92652870	0.618236
29	-0.02000449	8.91666700	-0.17837341		29.00000000	1.18413793	10.55856361	0.639626
30	-0.00990042	8.91735740	-0.08828558		30.00000000	1.14466667	10.20740177	0.660968
31	-0.00065975	8.91080380	-0.00587891		31.00000000	1.10774194	9.87087105	0.682552
32	0.00947389	8.91908840	0.08449845		32.00000000	1.07312500	9.57129674	0.703935
33	0.01933280	8.91106410	0.17227584		33.00000000	1.04060606	9.27290731	0.725322
34	0.02944329	8.91714570	0.26255007		34.00000000	1.01000000	9.00631716	0.746733
35	0.03927243	8.91683670	0.35018583		35.00000000	0.98114286	8.74869064	0.768201
36	0.04944841	8.91870120	0.44101558		36.00000000	0.95388889	8.50744998	0.789572
37	0.05924778	8.92069530	0.52853140		37.00000000	0.92810811	8.27936964	0.810943
38	0.06937687	8.92224220	0.61899725		38.00000000	0.90368421	8.06288940	0.832345
39	0.07953871	8.90055370	0.70793856		39.00000000	0.88051282	7.83705164	0.853829
40	0.08936190	8.92254730	0.79733577		40.00000000	0.85850000	7.66000686	0.875237
41	0.09951853	8.91627310	0.88733439		41.00000000	0.83756098	7.46792240	0.896599
42	0.10933874	8.92817500	0.97619540		42.00000000	0.81761905	7.29984594	0.917965
43	0.11948048	8.90591430	1.06408292		43.00000000	0.79860465	7.11230458	0.939444
44	0.12930293	8.90740780	1.15175393		44.00000000	0.78045455	6.95182691	0.960814
45	0.13943499	8.92651750	1.24466888		45.00000000	0.76311111	6.81192469	0.982196
46	0.14925298	8.90710930	1.32941261		46.00000000	0.74652174	6.64935073	1.003554
47	0.15940440	8.91399000	1.42092923		47.00000000	0.73063830	6.51290248	1.025023
48	0.16955283	8.91469100	1.51151109		48.00000000	0.71541667	6.37771852	1.046404
49	0.17939016	8.92295840	1.60069094		49.00000000	0.70081633	6.25335493	1.067785
50	0.18952820	8.90222640	1.68722295		50.00000000	0.68680000	6.11404909	1.089273
51	0.19931714	8.91872600	1.77765496		51.00000000	0.67333333	6.00527551	1.110651
52	0.20942613	8.91584870	1.86721169		52.00000000	0.66038462	5.88788931	1.132021
53	0.21927686	8.91490750	1.95483292		53.00000000	0.64792453	5.77618724	1.153401
54	0.22940819	8.91801170	2.04586492		54.00000000	0.63592593	5.67119485	1.174876
55	0.23922467	8.90699390	2.13077268		55.00000000	0.62436364	5.56120310	1.196240
56	0.24939544	8.91388130	2.22308135		56.00000000	0.61321429	5.46611935	1.217577
57	0.25955135	8.92412660	2.31626911		57.00000000	0.60245614	5.37639487	1.238950
58	0.26936409	8.91191390	2.40054958		58.00000000	0.59206897	5.27646764	1.260441
59	0.27951628	8.91319180	2.49138221		59.00000000	0.58203390	5.18777977	1.281812
60	0.28934169	8.91553880	2.57963706		60.00000000	0.57233333	5.10266004	1.303174
61	0.29949832	8.90822220	2.66799758		61.00000000	0.56295082	5.01489099	1.324548
62	0.30932224	8.92543980	2.76083703		62.00000000	0.55387097	4.94354198	1.346029
63	0.31943795	8.91013620	2.84623564		63.00000000	0.54507937	4.85673138	1.367427
64	0.32928941	8.92165470	2.93780641		64.00000000	0.53656250	4.78702535	1.388775
65	0.33942372	8.91692350	3.02661535		65.00000000	0.52830769	4.71087928	1.410151
66	0.34923798	8.92055990	3.11539832		66.00000000	0.52030303	4.64139435	1.431641
67	0.35937747	8.92093560	3.20598327		67.00000000	0.51253731	4.57231237	1.453004
68	0.36953411	8.91102790	3.29292876		68.00000000	0.50500000	4.50006909	1.474360
69	0.37938559	8.91016290	3.38038741		69.00000000	0.49768116	4.43442020	1.495737
70	0.38950053	8.91179370	3.47114837		70.00000000	0.49057143	4.37187137	1.517213
71	0.39935574	8.91337870	3.55960895		71.00000000	0.48366197	4.31106232	1.538601
72	0.40949896	8.90507790	3.64662014		72.00000000	0.47694444	4.24722743	1.559972
73	0.41931546	8.90459920	3.73383611		73.00000000	0.47041096	4.18882105	1.581334
74	0.42945048	8.91259480	3.82751811		74.00000000	0.46405405	4.13592575	1.602810
75	0.43925804	8.90782360	3.91283314		75.00000000	0.45786667	4.07859550	1.624183
76	0.44945413	8.90109830	4.00063539		76.00000000	0.45184211	4.02189100	1.645562
77	0.45957428	8.89941120	4.08994049		77.00000000	0.44597403	3.96890624	1.666912
78	0.46944585	8.89219670	4.17440484		78.00000000	0.44025641	3.91484660	1.688384
79	0.47956154	8.88266560	4.25978479		79.00000000	0.43468354	3.86114857	1.709754
80	0.48937878	8.86407850	4.33789192		80.00000000	0.42925000	3.80490570	1.731182
81	0.49947885	8.85211940	4.42144642		81.00000000	0.42395062	3.75286148	1.752654
82	0.50931913	8.83174800	4.49817821		82.00000000	0.41878049	3.69856374	1.774034
83	0.51945049	8.80076410	4.57156122		83.00000000	0.41373494	3.64118360	1.795387
84	0.52925730	8.74599170	4.62887995		84.00000000	0.40880952	3.57544470	1.816751
85	0.53939009	8.66217230	4.67228990		85.00000000	0.40400000	3.49951761	1.838237
86	0.54951549	8.57783410	4.71365271		86.00000000	0.39930233	3.42514910	1.859603
87	0.55936545	8.40528870	4.70162810		87.00000000	0.39471264	3.31767372	1.880950
88	0.56945956	8.19433400	4.66634183		88.00000000	0.39022727	3.19765261	1.902331
89	0.57928723	7.91748910	4.58650033		89.00000000	0.38584270	3.05490534	1.923802
90	0.58939248	7.50259300	4.42197189		90.00000000	0.38155556	2.86265604	1.945174
91	0.59917998	6.99783750	4.19296413		91.00000000	0.37736264	2.64072241	1.966530
92	0.60929489	6.32877160	3.85608820		92.00000000	0.37326087	2.36228279	1.988004
93	0.61910397	5.48243190	3.39419535		93.00000000	0.36924731	2.02437324	2.009515
94	0.62925464	4.40007880	2.76877000		94.00000000	0.36531915	1.60743304	2.030914
95	0.63936138	3.10727600	1.98667227		95.00000000	0.36147368	1.12319850	2.052322
96	0.64908856	1.56500490	1.01582678		96.00000000	0.35770833	0.55981529	2.073720
97	0.65916777	-0.30103964	-0.19843563		97.00000000	0.35402062	-0.10657424	2.095209
98	0.66895974	-2.41947650	-1.61853237		98.00000000	0.35040816	-0.84780432	2.116592
99	0.67902333	-4.97292610	-3.37673284		99.00000000	0.34686869	-1.72495235	2.137955
100	0.68892020	-7.89843180	-5.44138922		100.00000000	0.34340000	-2.71232148	2.159330
101	0.69521242	-9.99727250	-6.95022801		101.00000000	0.34000000	-3.39907265	2.180802
12:23 02/04/2018
Test Lot:	JK-PERC
Recipe:	Recipe_YJX-LID
Cell Name:	1-10-10min
Test Order:	4
Test Condition:	Light
1	-0.29987842	8.91805930	-2.67433353		1.00000000	34.34000000	306.24615636	0.000000
2	-0.29006833	8.92295070	-2.58826541		2.00000000	17.17000000	153.20706352	0.061731
3	-0.27993670	8.92577080	-2.49865082		3.00000000	11.44666667	102.17032309	0.083253
4	-0.27008867	8.91448310	-2.40770088		4.00000000	8.58500000	76.53083741	0.104638
5	-0.25993919	8.91107850	-2.31633853		5.00000000	6.86800000	61.20128714	0.125994
6	-0.24978374	8.91978170	-2.22801643		6.00000000	5.72333333	51.05088393	0.147372
7	-0.24000640	8.91902350	-2.14062272		7.00000000	4.90571429	43.75418100	0.168861
8	-0.22982417	8.90872570	-2.04744049		8.00000000	4.29250000	38.24070507	0.190291
9	-0.22000812	8.92888360	-1.96442689		9.00000000	3.81555556	34.06865142	0.211654
10	-0.20983779	8.90450190	-1.86850100		10.00000000	3.43400000	30.57805952	0.233024
11	-0.20005675	8.92155360	-1.78481702		11.00000000	3.12181818	27.85146824	0.254507
12	-0.18988939	8.91252710	-1.69239433		12.00000000	2.86166667	25.50468172	0.275902
13	-0.18012024	8.92040060	-1.60674470		13.00000000	2.64153846	23.56358128	0.297248
14	-0.16999383	8.92139050	-1.51658134		14.00000000	2.45285714	21.88289641	0.318634
15	-0.16016960	8.91721150	-1.42826620		15.00000000	2.28933333	20.41446953	0.340122
16	-0.15003797	8.89835550	-1.33509120		16.00000000	2.14625000	19.09809549	0.361495
17	-0.13986020	8.93037700	-1.24900431		17.00000000	2.02000000	18.03936154	0.382865
18	-0.13004120	8.90346340	-1.15781706		18.00000000	1.90777778	16.98582962	0.404247
19	-0.11991850	8.92458630	-1.07022300		19.00000000	1.80736842	16.13001545	0.425723
20	-0.11005259	8.90845200	-0.98039822		20.00000000	1.71700000	15.29581208	0.447102
21	-0.09993287	8.90803620	-0.89020564		21.00000000	1.63523810	14.56676015	0.468481
22	-0.09008781	8.90783790	-0.80248760		22.00000000	1.56090909	13.90432516	0.489830
23	-0.07993311	8.91903020	-0.71292580		23.00000000	1.49304348	13.31649987	0.511303
24	-0.07012079	8.90994360	-0.62477228		24.00000000	1.43083333	12.74864430	0.532673
25	-0.05997279	8.90191840	-0.53387287		25.00000000	1.37360000	12.22767511	0.554063
26	-0.04984563	8.92972090	-0.44510755		26.00000000	1.32076923	11.79410060	0.575479
27	-0.04003555	8.91521360	-0.35692548		27.00000000	1.27185185	11.33883093	0.596931
28	-0.02984512	8.91504670	-0.26607064		28.00000000	1.22642857	10.93366799	0.618317
29	-0.02002834	8.90369030	-0.17832614		29.00000000	1.18413793	10.54319741	0.639684
30	-0.00986248	8.93158820	-0.08808757		30.00000000	1.14466667	10.22369129	0.661045
31	-0.00064561	8.91263580	-0.00575411		31.00000000	1.10774194	9.87290043	0.682658
32	0.00950144	8.91917040	0.08474493		32.00000000	1.07312500	9.57138474	0.704050
33	0.01930529	8.91039090	0.17201764		33.00000000	1.04060606	9.27220677	0.725424
34	0.02947756	8.92626670	0.26312455		34.00000000	1.01000000	9.01552937	0.746787
35	0.03926354	8.91253570	0.34993773		35.00000000	0.98114286	8.74447074	0.768272
36	0.04944921	8.91172410	0.44067774		36.00000000	0.95388889	8.50079460	0.789669
37	0.05923818	8.91170790	0.52791333		37.00000000	0.92810811	8.27102836	0.811047
38	0.06939780	8.91658880	0.61879165		38.00000000	0.90368421	8.05778051	0.832388
39	0.07956337	8.90879730	0.70881395		39.00000000	0.88051282	7.84431024	0.853848
40	0.08935457	8.92002490	0.79704496		40.00000000	0.85850000	7.65784138	0.875216
41	0.09949930	8.90046310	0.88558985		41.00000000	0.83756098	7.45468056	0.896597
42	0.10931357	8.93903350	0.97715766		42.00000000	0.81761905	7.30872406	0.918089
43	0.11946203	8.90125080	1.06336149		43.00000000	0.79860465	7.10858029	0.939474
44	0.12930830	8.91546730	1.15284392		44.00000000	0.78045455	6.95811698	0.960813
45	0.13944113	8.91740990	1.24345371		45.00000000	0.76311111	6.80497458	0.982196
46	0.14923827	8.92050270	1.33128039		46.00000000	0.74652174	6.65934919	1.003680
47	0.15942618	8.90397450	1.41952664		47.00000000	0.73063830	6.50558477	1.025068
48	0.16955380	8.92383670	1.51307042		48.00000000	0.71541667	6.38426151	1.046419
49	0.17937402	8.91179470	1.59854444		49.00000000	0.70081633	6.24553122	1.067803
50	0.18952248	8.90227890	1.68718197		50.00000000	0.68680000	6.11408515	1.089285
51	0.19928390	8.91038610	1.77569649		51.00000000	0.67333333	5.99965997	1.110661
52	0.20942640	8.90536790	1.86501914		52.00000000	0.66038462	5.88096796	1.132006
53	0.21926746	8.90806290	1.95324833		53.00000000	0.64792453	5.77175245	1.153382
54	0.22938392	8.92781350	2.04789686		54.00000000	0.63592593	5.67742807	1.174870
55	0.23925474	8.90734200	2.13112379		55.00000000	0.62436364	5.56142044	1.196253
56	0.24940470	8.92362980	2.22559521		56.00000000	0.61321429	5.47209727	1.217617
57	0.25954944	8.91074660	2.31277929		57.00000000	0.60245614	5.36833400	1.238996
58	0.26935178	8.92704390	2.40451516		58.00000000	0.59206897	5.28542565	1.260473
59	0.27946824	8.89544010	2.48599299		59.00000000	0.58203390	5.17744768	1.281857
60	0.28933534	8.91256900	2.57872118		60.00000000	0.57233333	5.10096032	1.303212
61	0.29946595	8.91654590	2.67020189		61.00000000	0.56295082	5.01957682	1.324590
62	0.30933753	8.91004560	2.75621150		62.00000000	0.55387097	4.93501558	1.346076
63	0.31944430	8.91079620	2.84650305		63.00000000	0.54507937	4.85709114	1.367453
64	0.32926825	8.90152740	2.93099035		64.00000000	0.53656250	4.77622580	1.388835
65	0.33942190	8.91542720	3.02609124		65.00000000	0.52830769	4.71008877	1.410199
66	0.34924808	8.91827960	3.11469203		66.00000000	0.52030303	4.64020790	1.431681
67	0.35936007	8.91268920	3.20286461		67.00000000	0.51253731	4.56808578	1.453066
68	0.36955318	8.91337010	3.29396426		68.00000000	0.50500000	4.50125190	1.474444
69	0.37936747	8.90225890	3.37722744		69.00000000	0.49768116	4.43048653	1.495787
70	0.38952857	8.90689660	3.46949070		70.00000000	0.49057143	4.36946899	1.517253
71	0.39932349	8.90092370	3.55434792		71.00000000	0.48366197	4.30503831	1.538622
72	0.40947267	8.91759010	3.65150943		72.00000000	0.47694444	4.25319506	1.559994
73	0.41931969	8.90778450	3.73520944		73.00000000	0.47041096	4.19031945	1.581489
74	0.42946666	8.90741350	3.82543713		74.00000000	0.46405405	4.13352135	1.602866
75	0.43929210	8.90840340	3.91339124		75.00000000	0.45786667	4.07886097	1.624210
76	0.44944501	8.88821890	3.99476563		76.00000000	0.45184211	4.01607154	1.645602
77	0.45956966	8.90899940	4.09430583		77.00000000	0.44597403	3.97318233	1.667078
78	0.46944124	8.88731960	4.17207433		78.00000000	0.44025641	3.91269942	1.688470
79	0.47955248	8.88573070	4.26117419		79.00000000	0.43468354	3.86248091	1.709825
80	0.48935261	8.87526040	4.34313184		80.00000000	0.42925000	3.80970553	1.731187
81	0.49950999	8.85036950	4.42084798		81.00000000	0.42395062	3.75211961	1.752670
82	0.50934583	8.83133130	4.49820177		82.00000000	0.41878049	3.69838923	1.774053
83	0.51948684	8.79908470	4.57100871		83.00000000	0.41373494	3.64048878	1.795393
84	0.52923489	8.73113440	4.62082095		84.00000000	0.40880952	3.56937090	1.816768
85	0.53939748	8.67008690	4.67662303		85.00000000	0.40400000	3.50271511	1.838246
86	0.54953402	8.55461690	4.70105301		86.00000000	0.39930233	3.41587842	1.859612
87	0.55932152	8.40744400	4.70246436		87.00000000	0.39471264	3.31852445	1.880973
88	0.56949526	8.18402000	4.66076060		88.00000000	0.39022727	3.19362780	1.902349
89	0.57926857	7.90772960	4.58069922		89.00000000	0.38584270	3.05113971	1.923832
90	0.58939099	7.50436540	4.42300535		90.00000000	0.38155556	2.86333231	1.945220
91	0.59919709	6.98409890	4.18485174		91.00000000	0.37736264	2.63553798	1.966566
92	0.60932171	6.31538870	3.84810344		92.00000000	0.37326087	2.35728748	1.988036
93	0.61909950	5.46479850	3.38325402		93.00000000	0.36924731	2.01786216	2.009534
94	0.62923312	4.40065570	2.76903832		94.00000000	0.36531915	1.60764380	2.030917
95	0.63936669	3.08436580	1.97204075		95.00000000	0.36147368	1.11491707	2.052287
96	0.64912361	1.57152560	1.02011437		96.00000000	0.35770833	0.56214780	2.073661
97	0.65922892	-0.29535392	-0.19470585		97.00000000	0.35402062	-0.10456138	2.095143
98	0.66896057	-2.40197230	-1.60682476		98.00000000	0.35040816	-0.84167070	2.116540
99	0.67898697	-4.93892570	-3.35346620		99.00000000	0.34686869	-1.71315867	2.137927
100	0.68889946	-7.83325960	-5.39632831		100.00000000	0.34340000	-2.68994135	2.159270
101	0.69539046	-9.99688240	-6.95173665		101.00000000	0.34000000	-3.39894002	2.180888
