# Supplementary material for: Study on the Electrical Injection Regeneration of Industrialized B-Doped Czochralski Silicon PERC Solar Cells
Source: Hindawi journal article supplement (doi:10.1155/2019/5357370), 2019-06-20
Supplement: f1 [file 5357370.f1.zip › section3.2/IVRawData_1-10-20min.csv]

12:41 02/04/2018
Test Lot:	JK-PERC
Recipe:	Recipe_YJX-LID
Cell Name:	1-10-20min
Test Order:	2
Test Condition:	Light
1	-0.29987448	8.91418360	-2.67313617		1.00000000	34.34000000	306.11306482	0.000000
2	-0.29011679	8.93380170	-2.59184587		2.00000000	17.17000000	153.39337519	0.061769
3	-0.27998695	8.91831780	-2.49701260		3.00000000	11.44666667	102.08501108	0.083239
4	-0.27011466	8.93032840	-2.41221262		4.00000000	8.58500000	76.66686931	0.104744
5	-0.25997663	8.92129330	-2.31932777		5.00000000	6.86800000	61.27144238	0.126130
6	-0.24981777	8.93132020	-2.23120250		6.00000000	5.72333333	51.11692261	0.147495
7	-0.23997971	8.91982940	-2.14057807		7.00000000	4.90571429	43.75813451	0.168869
8	-0.22984095	8.92016980	-2.05022030		8.00000000	4.29250000	38.28982887	0.190367
9	-0.22002521	8.92771530	-1.96432243		9.00000000	3.81555556	34.06419371	0.211751
10	-0.20986709	8.92992780	-1.87409796		10.00000000	3.43400000	30.66537207	0.233104
11	-0.20005135	8.91590600	-1.78363903		11.00000000	3.12181818	27.83383746	0.254516
12	-0.18989772	8.92567540	-1.69496541		12.00000000	2.86166667	25.54230777	0.276003
13	-0.18008494	8.90876010	-1.60433353		13.00000000	2.64153846	23.53283245	0.297379
14	-0.16993576	8.94393630	-1.51989461		14.00000000	2.45285714	21.93819804	0.318724
15	-0.16017435	8.91658400	-1.42820805		15.00000000	2.28933333	20.41303297	0.340116
16	-0.14999169	8.91586300	-1.33730536		16.00000000	2.14625000	19.13567096	0.361602
17	-0.13984102	8.93358420	-1.24928153		17.00000000	2.02000000	18.04584008	0.382999
18	-0.13001336	8.91382500	-1.15891634		18.00000000	1.90777778	17.00559725	0.404363
19	-0.11987088	8.91418550	-1.06855126		19.00000000	1.80736842	16.11121737	0.425711
20	-0.11005142	8.93164730	-0.98294047		20.00000000	1.71700000	15.33563841	0.447200
21	-0.09989033	8.92473600	-0.89149482		21.00000000	1.63523810	14.59406830	0.468564
22	-0.09007980	8.92454620	-0.80392133		22.00000000	1.56090909	13.93040530	0.489939
23	-0.07992764	8.91941740	-0.71290797		23.00000000	1.49304348	13.31707798	0.511301
24	-0.07011860	8.91695590	-0.62524446		24.00000000	1.43083333	12.75867773	0.532768
25	-0.05997984	8.93413160	-0.53586776		25.00000000	1.37360000	12.27192317	0.554148
26	-0.04983661	8.91219140	-0.44415341		26.00000000	1.32076923	11.77094818	0.575546
27	-0.03996282	8.93053910	-0.35688950		27.00000000	1.27185185	11.35832269	0.597021
28	-0.02983894	8.92737480	-0.26638340		28.00000000	1.22642857	10.94878752	0.618395
29	-0.02002692	8.92349150	-0.17871007		29.00000000	1.18413793	10.56664476	0.639751
30	-0.00988742	8.91881180	-0.08818399		30.00000000	1.14466667	10.20906657	0.661129
31	-0.00066934	8.92533490	-0.00597412		31.00000000	1.10774194	9.88696776	0.682741
32	0.00950345	8.92058370	0.08477631		32.00000000	1.07312500	9.57290138	0.704124
33	0.01930551	8.92988300	0.17239595		33.00000000	1.04060606	9.29249037	0.725467
34	0.02945738	8.91291240	0.26255106		34.00000000	1.01000000	9.00204152	0.746848
35	0.03929070	8.93056580	0.35088822		35.00000000	0.98114286	8.76216084	0.768333
36	0.04942397	8.91469290	0.44059949		36.00000000	0.95388889	8.50362651	0.789712
37	0.05924092	8.92254640	0.52857981		37.00000000	0.92810811	8.28108766	0.811072
38	0.06939428	8.92736150	0.61950779		38.00000000	0.90368421	8.06751563	0.832449
39	0.07953423	8.91188720	0.70880011		39.00000000	0.88051282	7.84703093	0.853929
40	0.08936755	8.91915700	0.79708324		40.00000000	0.85850000	7.65709628	0.875326
41	0.09951720	8.94283680	0.88996604		41.00000000	0.83756098	7.49017111	0.896675
42	0.10933117	8.90642830	0.97375023		42.00000000	0.81761905	7.28206542	0.918054
43	0.11948825	8.92951580	1.06697222		43.00000000	0.79860465	7.13115285	0.939530
44	0.12928584	8.92909340	1.15440534		44.00000000	0.78045455	6.96875153	0.960901
45	0.13945930	8.91659070	1.24350150		45.00000000	0.76311111	6.80434944	0.982257
46	0.14927848	8.91596130	1.33096115		46.00000000	0.74652174	6.65595894	1.003628
47	0.15943258	8.92029000	1.42218485		47.00000000	0.73063830	6.51750550	1.025116
48	0.16957180	8.92885680	1.51408232		48.00000000	0.71541667	6.38785297	1.046501
49	0.17940736	8.90833470	1.59822081		49.00000000	0.70081633	6.24310640	1.067868
50	0.18953392	8.93832590	1.69411595		50.00000000	0.68680000	6.13884223	1.089235
51	0.19931515	8.94157980	1.78219232		51.00000000	0.67333333	6.02066373	1.110702
52	0.20943500	8.92327400	1.86884589		52.00000000	0.66038462	5.89279287	1.132075
53	0.21928619	8.91772840	1.95553468		53.00000000	0.64792453	5.77801497	1.153450
54	0.22943285	8.92626480	2.04797837		54.00000000	0.63592593	5.67644321	1.174814
55	0.23926394	8.91693120	2.13350009		55.00000000	0.62436364	5.56740759	1.196293
56	0.24942102	8.91706090	2.22410243		56.00000000	0.61321429	5.46806913	1.217688
57	0.25958183	8.92774490	2.31748036		57.00000000	0.60245614	5.37857473	1.239077
58	0.26939356	8.91060260	2.40045896		58.00000000	0.59206897	5.27569126	1.260552
59	0.27954021	8.92302700	2.49434484		59.00000000	0.58203390	5.19350419	1.281945
60	0.28934377	8.90836810	2.57758081		60.00000000	0.57233333	5.09855601	1.303293
61	0.29948151	8.92328930	2.67236015		61.00000000	0.56295082	5.02337303	1.324665
62	0.30930662	8.91963770	2.75890299		62.00000000	0.55387097	4.94032836	1.346152
63	0.31946000	8.91595650	2.84829146		63.00000000	0.54507937	4.85990391	1.367559
64	0.32927471	8.93281840	2.94135119		64.00000000	0.53656250	4.79301537	1.388923
65	0.33940575	8.92292690	3.02849270		65.00000000	0.52830769	4.71405092	1.410300
66	0.34925172	8.91426370	3.11332193		66.00000000	0.52030303	4.63811842	1.431774
67	0.35937679	8.91538240	3.20398151		67.00000000	0.51253731	4.56946614	1.453153
68	0.36954281	8.91595460	3.29482692		68.00000000	0.50500000	4.50255707	1.474518
69	0.37937462	8.91093250	3.38058163		69.00000000	0.49768116	4.43480322	1.495889
70	0.38951385	8.92055890	3.47468124		70.00000000	0.49057143	4.37617132	1.517376
71	0.39932114	8.90717320	3.55682256		71.00000000	0.48366197	4.30806095	1.538752
72	0.40946406	8.92736630	3.65543565		72.00000000	0.47694444	4.25785776	1.560094
73	0.41930333	8.91747190	3.73912566		73.00000000	0.47041096	4.19487651	1.581480
74	0.42945820	8.90455440	3.82413390		74.00000000	0.46405405	4.13219457	1.602962
75	0.43926620	8.91205120	3.91476286		75.00000000	0.45786667	4.08053118	1.624349
76	0.44943446	8.91730980	4.00774631		76.00000000	0.45184211	4.02921603	1.645708
77	0.45957142	8.89269350	4.08682778		77.00000000	0.44597403	3.96591032	1.667084
78	0.46942931	8.89874360	4.17733107		78.00000000	0.44025641	3.91772891	1.688560
79	0.47958863	8.88433740	4.26082720		79.00000000	0.43468354	3.86187527	1.709951
80	0.48938251	8.87683770	4.34416911		80.00000000	0.42925000	3.81038258	1.731314
81	0.49950311	8.85327340	4.42223760		81.00000000	0.42395062	3.75335072	1.752680
82	0.50934386	8.84315970	4.50420910		82.00000000	0.41878049	3.70334273	1.774166
83	0.51947641	8.79638770	4.56951590		83.00000000	0.41373494	3.63937294	1.795541
84	0.52927029	8.72548390	4.61813939		84.00000000	0.40880952	3.56706092	1.816924
85	0.53937525	8.67998030	4.68176654		85.00000000	0.40400000	3.50671204	1.838277
86	0.54952341	8.55045700	4.69867629		86.00000000	0.39930233	3.41421736	1.859753
87	0.55935079	8.41337200	4.70602627		87.00000000	0.39471264	3.32086430	1.881161
88	0.56947660	8.19968800	4.66953044		88.00000000	0.39022727	3.19974189	1.902546
89	0.57929873	7.91995910	4.58802225		89.00000000	0.38584270	3.05585838	1.924027
90	0.58939928	7.52755450	4.43673520		90.00000000	0.38155556	2.87218024	1.945415
91	0.59920800	7.00292730	4.19621006		91.00000000	0.37736264	2.64264312	1.966768
92	0.60932493	6.32970520	3.85684718		92.00000000	0.37326087	2.36263127	1.988244
93	0.61909199	5.49040890	3.39906817		93.00000000	0.36924731	2.02731873	2.009759
94	0.62922525	4.42863700	2.78661022		94.00000000	0.36531915	1.61786590	2.031139
95	0.63932651	3.11131410	1.98914559		95.00000000	0.36147368	1.12465817	2.052476
96	0.64912486	1.59390460	1.03464310		96.00000000	0.35770833	0.57015296	2.073905
97	0.65917182	-0.27132496	-0.17884977		97.00000000	0.35402062	-0.09605463	2.095407
98	0.66894406	-2.36997200	-1.58537869		98.00000000	0.35040816	-0.83045754	2.116787
99	0.67899996	-4.92358300	-3.34311266		99.00000000	0.34686869	-1.70783677	2.138160
100	0.68890023	-7.83955190	-5.40066911		100.00000000	0.34340000	-2.69210212	2.159540
101	0.69542974	-9.99681660	-6.95208357		101.00000000	0.34000000	-3.39891764	2.181024
12:41 02/04/2018
Test Lot:	JK-PERC
Recipe:	Recipe_YJX-LID
Cell Name:	1-10-20min
Test Order:	3
Test Condition:	Light
1	-0.29986629	8.91871170	-2.67442099		1.00000000	34.34000000	306.26855978	0.000000
2	-0.29004163	8.92174720	-2.58767810		2.00000000	17.17000000	153.18639942	0.021492
3	-0.27988872	8.92314720	-2.49748825		3.00000000	11.44666667	102.14029162	0.042878
4	-0.27011615	8.92102620	-2.40971325		4.00000000	8.58500000	76.58700993	0.064259
5	-0.25995207	8.90207960	-2.31411402		5.00000000	6.86800000	61.13948269	0.085769
6	-0.24982150	8.93601610	-2.23240895		6.00000000	5.72333333	51.14379881	0.107156
7	-0.24000725	8.91908840	-2.14064588		7.00000000	4.90571429	43.75449938	0.128507
8	-0.22985211	8.91384700	-2.04886654		8.00000000	4.29250000	38.26268825	0.149927
9	-0.21999618	8.92857460	-1.96425230		9.00000000	3.81555556	34.06747242	0.171433
10	-0.20987827	8.91288850	-1.87062162		10.00000000	3.43400000	30.60685911	0.192829
11	-0.20006178	8.92214300	-1.78497981		11.00000000	3.12181818	27.85330824	0.214177
12	-0.18990292	8.92475800	-1.69483760		12.00000000	2.86166667	25.53968248	0.235549
13	-0.18013556	8.92109300	-1.60700608		13.00000000	2.64153846	23.56541028	0.257036
14	-0.17000127	8.92205620	-1.51676089		14.00000000	2.45285714	21.88452928	0.278417
15	-0.16017435	8.92068390	-1.42886475		15.00000000	2.28933333	20.42241901	0.299779
16	-0.15001923	8.91112330	-1.33683986		16.00000000	2.14625000	19.12549838	0.321157
17	-0.13986111	8.92619130	-1.24842702		17.00000000	2.02000000	18.03090643	0.342644
18	-0.13006918	8.92391200	-1.16072592		18.00000000	1.90777778	17.02484100	0.364014
19	-0.11987832	8.93057060	-1.07058180		19.00000000	1.80736842	16.14083128	0.385360
20	-0.11006631	8.92172240	-0.98198106		20.00000000	1.71700000	15.31859736	0.406744
21	-0.09989107	8.92427060	-0.89145497		21.00000000	1.63523810	14.59330726	0.428211
22	-0.09010883	8.92288880	-0.80403104		22.00000000	1.56090909	13.92781825	0.449594
23	-0.07993434	8.92610650	-0.71350240		23.00000000	1.49304348	13.32706510	0.470949
24	-0.07015581	8.93001650	-0.62649258		24.00000000	1.43083333	12.77736528	0.492323
25	-0.05997463	8.91081620	-0.53442290		25.00000000	1.37360000	12.23989713	0.513799
26	-0.04983586	8.92317390	-0.44469408		26.00000000	1.32076923	11.78545353	0.535185
27	-0.04002832	8.91752530	-0.35695351		27.00000000	1.27185185	11.34177107	0.556573
28	-0.02986425	8.91656880	-0.26628660		28.00000000	1.22642857	10.93553474	0.577922
29	-0.02003064	8.92257020	-0.17872483		29.00000000	1.18413793	10.56555382	0.599388
30	-0.00989337	8.92729090	-0.08832099		30.00000000	1.14466667	10.21877232	0.620758
31	-0.00063362	8.92881010	-0.00565745		31.00000000	1.10774194	9.89081738	0.642297
32	0.00951685	8.92502120	0.08493805		32.00000000	1.07312500	9.57766338	0.663761
33	0.01933751	8.92149540	0.17251954		33.00000000	1.04060606	9.28376218	0.685222
34	0.02949013	8.91493320	0.26290252		34.00000000	1.01000000	9.00408253	0.706615
35	0.03932047	8.92193410	0.35081467		35.00000000	0.98114286	8.75369191	0.727993
36	0.04945225	8.90973280	0.44060632		36.00000000	0.95388889	8.49889512	0.749326
37	0.05928334	8.93011670	0.52940713		37.00000000	0.92810811	8.28811372	0.770813
38	0.06943223	8.90819260	0.61851567		38.00000000	0.90368421	8.05019300	0.792203
39	0.07954391	8.92139820	0.70964290		39.00000000	0.88051282	7.85540549	0.813562
40	0.08937053	8.91633030	0.79685720		40.00000000	0.85850000	7.65466956	0.834934
41	0.09951347	8.91210080	0.88687408		41.00000000	0.83756098	7.46442784	0.856414
42	0.10935871	8.92327120	0.97583743		42.00000000	0.81761905	7.29583650	0.877791
43	0.11949717	8.91530040	1.06535317		43.00000000	0.79860465	7.11980037	0.899188
44	0.12934241	8.92387200	1.15423511		44.00000000	0.78045455	6.96467647	0.920543
45	0.13945483	8.91530510	1.24328236		45.00000000	0.76311111	6.80336838	0.942011
46	0.14925838	8.92266180	1.33178205		46.00000000	0.74652174	6.66096100	0.963392
47	0.15941918	8.90980630	1.42039401		47.00000000	0.73063830	6.50984571	0.984808
48	0.16957849	8.93078230	1.51446858		48.00000000	0.71541667	6.38923050	1.006299
49	0.17936864	8.91483120	1.59904115		49.00000000	0.70081633	6.24765925	1.027671
50	0.18953541	8.93019010	1.69258724		50.00000000	0.68680000	6.13325456	1.049008
51	0.19930471	8.90335750	1.77448108		51.00000000	0.67333333	5.99492738	1.070390
52	0.20945659	8.92830090	1.87009146		52.00000000	0.66038462	5.89611256	1.091881
53	0.21927056	8.92266370	1.95647747		53.00000000	0.64792453	5.78121267	1.113261
54	0.22941871	8.92337130	2.04718833		54.00000000	0.63592593	5.67460316	1.134625
55	0.23926170	8.92095470	2.13444279		55.00000000	0.62436364	5.56991972	1.156003
56	0.24940613	8.91138170	2.22255322		56.00000000	0.61321429	5.46458656	1.177483
57	0.25954238	8.92747500	2.31705811		57.00000000	0.60245614	5.37841213	1.198885
58	0.26936007	8.92032530	2.40277945		58.00000000	0.59206897	5.28144777	1.220226
59	0.27952236	8.92079730	2.49356231		59.00000000	0.58203390	5.19220643	1.241601
60	0.28934452	8.91664410	2.57998211		60.00000000	0.57233333	5.10329264	1.263091
61	0.29949638	8.93199730	2.67510086		61.00000000	0.56295082	5.02827520	1.284473
62	0.30933416	8.92154500	2.75973863		62.00000000	0.55387097	4.94138476	1.305842
63	0.31947637	8.91378310	2.84774307		63.00000000	0.54507937	4.85871923	1.327213
64	0.32928437	8.90645500	2.93275642		64.00000000	0.53656250	4.77886976	1.348689
65	0.33942956	8.92992310	3.03107987		65.00000000	0.52830769	4.71774707	1.370069
66	0.34926584	8.92368320	3.11673771		66.00000000	0.52030303	4.64301941	1.391424
67	0.35940284	8.91355610	3.20355738		67.00000000	0.51253731	4.56853010	1.412800
68	0.36957332	8.91826920	3.29595436		68.00000000	0.50500000	4.50372595	1.434275
69	0.37938133	8.91495510	3.38216752		69.00000000	0.49768116	4.43680519	1.455662
70	0.38952428	8.91763500	3.47363535		70.00000000	0.49057143	4.37473694	1.477020
71	0.39936429	8.91456410	3.56015856		71.00000000	0.48366197	4.31163565	1.498397
72	0.40949383	8.92314910	3.65397450		72.00000000	0.47694444	4.25584639	1.519875
73	0.41930705	8.90938760	3.73576903		73.00000000	0.47041096	4.19107356	1.541241
74	0.42947307	8.91824250	3.83014499		74.00000000	0.46405405	4.13854659	1.562631
75	0.43928629	8.89928440	3.90933363		75.00000000	0.45786667	4.07468568	1.583984
76	0.44945157	8.92016320	4.00918135		76.00000000	0.45184211	4.03050532	1.605455
77	0.45958185	8.90406890	4.09214846		77.00000000	0.44597403	3.97098345	1.626829
78	0.46943155	8.90481950	4.18020322		78.00000000	0.44025641	3.92040387	1.648211
79	0.47957227	8.88463120	4.26082275		79.00000000	0.43468354	3.86200298	1.669698
80	0.48939887	8.87452600	4.34318300		80.00000000	0.42925000	3.80939029	1.691078
81	0.49952617	8.85999870	4.42580122		81.00000000	0.42395062	3.75620192	1.712428
82	0.50935954	8.83852670	4.50198789		82.00000000	0.41878049	3.70140252	1.733816
83	0.51947939	8.79269980	4.56762633		83.00000000	0.41373494	3.63784712	1.755292
84	0.52926135	8.75655650	4.63450691		84.00000000	0.40880952	3.57976369	1.776675
85	0.53937525	8.66661070	4.67455531		85.00000000	0.40400000	3.50131072	1.798037
86	0.54955393	8.56153680	4.70502620		86.00000000	0.39930233	3.41864155	1.819411
87	0.55935299	8.41861630	4.70897820		87.00000000	0.39471264	3.32293430	1.840891
88	0.56946617	8.19777200	4.66835382		88.00000000	0.39022727	3.19899421	1.862265
89	0.57927942	7.92564250	4.59116159		89.00000000	0.38584270	3.05805127	1.883648
90	0.58943874	7.52798180	4.43728411		90.00000000	0.38155556	2.87234328	1.905027
91	0.59920430	7.01863380	4.20559555		91.00000000	0.37736264	2.64857016	1.926503
92	0.60929888	6.33598760	3.86051015		92.00000000	0.37326087	2.36497624	1.947889
93	0.61909276	5.50664090	3.40912151		93.00000000	0.36924731	2.03331235	1.969247
94	0.62922603	4.43014340	2.78756154		94.00000000	0.36531915	1.61841622	1.990719
95	0.63935703	3.12553190	1.99833079		95.00000000	0.36147368	1.12979753	2.012226
96	0.64911819	1.58628510	1.02968651		96.00000000	0.35770833	0.56742740	2.033631
97	0.65917701	-0.28172806	-0.18570866		97.00000000	0.35402062	-0.09973754	2.054980
98	0.66895378	-2.40584090	-1.60939636		98.00000000	0.35040816	-0.84302629	2.076343
99	0.67898357	-5.00784250	-3.40024278		99.00000000	0.34686869	-1.73706375	2.097837
100	0.68893301	-7.93968870	-5.46991363		100.00000000	0.34340000	-2.72648910	2.119221
101	0.69498020	-9.99729060	-6.94791902		101.00000000	0.34000000	-3.39907880	2.140577
12:41 02/04/2018
Test Lot:	JK-PERC
Recipe:	Recipe_YJX-LID
Cell Name:	1-10-20min
Test Order:	4
Test Condition:	Light
1	-0.29989278	8.93860050	-2.68062175		1.00000000	34.34000000	306.95154117	0.000000
2	-0.29008150	8.90955450	-2.58449693		2.00000000	17.17000000	152.97705077	0.061801
3	-0.27992409	8.92269130	-2.49767624		3.00000000	11.44666667	102.13507308	0.083223
4	-0.27009273	8.92392830	-2.41028816		4.00000000	8.58500000	76.61192446	0.104732
5	-0.25992045	8.91810040	-2.31799667		5.00000000	6.86800000	61.24951355	0.126128
6	-0.24978167	8.91614150	-2.22708871		6.00000000	5.72333333	51.03004985	0.147475
7	-0.23995475	8.92993640	-2.14278066		7.00000000	4.90571429	43.80771657	0.168854
8	-0.22982790	8.91182230	-2.04818540		8.00000000	4.29250000	38.25399722	0.190345
9	-0.21997790	8.92767620	-1.96389146		9.00000000	3.81555556	34.06404452	0.211787
10	-0.20981531	8.91824250	-1.87118381		10.00000000	3.43400000	30.62524475	0.233188
11	-0.20002262	8.91810040	-1.78382181		11.00000000	3.12181818	27.84068798	0.254541
12	-0.18987641	8.91194250	-1.69216765		12.00000000	2.86166667	25.50300879	0.276026
13	-0.18010531	8.92246820	-1.60698390		13.00000000	2.64153846	23.56904292	0.297410
14	-0.16993751	8.91800020	-1.51550275		14.00000000	2.45285714	21.87458049	0.318787
15	-0.16012324	8.91121100	-1.42689198		15.00000000	2.28933333	20.40073238	0.340203
16	-0.14999413	8.92522140	-1.33873082		16.00000000	2.14625000	19.15575643	0.361669
17	-0.13982038	8.91313080	-1.24623734		17.00000000	2.02000000	18.00452422	0.383039
18	-0.12998229	8.92259500	-1.15977933		18.00000000	1.90777778	17.02232846	0.404412
19	-0.11987478	8.92071720	-1.06936901		19.00000000	1.80736842	16.12302256	0.425764
20	-0.11007540	8.91658210	-0.98149634		20.00000000	1.71700000	15.30977147	0.447259
21	-0.09989420	8.91597940	-0.89065459		21.00000000	1.63523810	14.57974917	0.468661
22	-0.09005909	8.93022630	-0.80424809		22.00000000	1.56090909	13.93927142	0.490038
23	-0.07995009	8.91631130	-0.71285986		23.00000000	1.49304348	13.31244044	0.511417
24	-0.07009340	8.92655470	-0.62569258		24.00000000	1.43083333	12.77241202	0.532896
25	-0.05993676	8.91492460	-0.53433168		25.00000000	1.37360000	12.24554043	0.554278
26	-0.04980096	8.93091770	-0.44476826		26.00000000	1.32076923	11.79568130	0.575669
27	-0.03998670	8.91917040	-0.35664816		27.00000000	1.27185185	11.34386339	0.597019
28	-0.02987099	8.92871280	-0.26670950		28.00000000	1.22642857	10.95042848	0.618492
29	-0.02001505	8.91119100	-0.17835790		29.00000000	1.18413793	10.55207927	0.639878
30	-0.00989264	8.93550210	-0.08839573		30.00000000	1.14466667	10.22817140	0.661262
31	-0.00062841	8.91427710	-0.00560183		31.00000000	1.10774194	9.87471857	0.682852
32	0.00951462	8.91329770	0.08480666		32.00000000	1.07312500	9.56508259	0.704255
33	0.01932563	8.93892100	0.17275029		33.00000000	1.04060606	9.30189537	0.725608
34	0.02948496	8.90800190	0.26265207		34.00000000	1.01000000	8.99708192	0.746981
35	0.03929076	8.92064860	0.35049903		35.00000000	0.98114286	8.75243065	0.768464
36	0.04943297	8.91976930	0.44093066		36.00000000	0.95388889	8.50846883	0.789847
37	0.05928565	8.91534520	0.52855205		37.00000000	0.92810811	8.27440417	0.811208
38	0.06945019	8.92030330	0.61951678		38.00000000	0.90368421	8.06113725	0.832582
39	0.07957751	8.91968730	0.70980653		39.00000000	0.88051282	7.85389902	0.854066
40	0.08938331	8.91998770	0.79729804		40.00000000	0.85850000	7.65780944	0.875455
41	0.09955455	8.92574020	0.88859801		41.00000000	0.83756098	7.47585167	0.896808
42	0.10936258	8.91589070	0.97506481		42.00000000	0.81761905	7.28980206	0.918181
43	0.11951447	8.92348100	1.06648510		43.00000000	0.79860465	7.12633343	0.939661
44	0.12934110	8.91312220	1.15283303		44.00000000	0.78045455	6.95628674	0.961043
45	0.13948332	8.91995810	1.24418537		45.00000000	0.76311111	6.80691914	0.982384
46	0.14929730	8.90859790	1.33002961		46.00000000	0.74652174	6.65046200	1.003766
47	0.15945365	8.93207550	1.42425204		47.00000000	0.73063830	6.52611644	1.025259
48	0.16959734	8.91206930	1.51146325		48.00000000	0.71541667	6.37584291	1.046632
49	0.17941877	8.92041870	1.60049055		49.00000000	0.70081633	6.25157506	1.067988
50	0.18957810	8.90880490	1.68891431		50.00000000	0.68680000	6.11856721	1.089359
51	0.19934817	8.92490960	1.77916440		51.00000000	0.67333333	6.00943913	1.110833
52	0.20950080	8.92000290	1.86874774		52.00000000	0.66038462	5.89063268	1.132229
53	0.21929619	8.91498470	1.95502218		53.00000000	0.64792453	5.77623726	1.153590
54	0.22945774	8.92321400	2.04750052		54.00000000	0.63592593	5.67450313	1.174955
55	0.23929033	8.92119980	2.13475684		55.00000000	0.62436364	5.57007275	1.196441
56	0.24941468	8.91145320	2.22264725		56.00000000	0.61321429	5.46463041	1.217819
57	0.25956807	8.93011950	2.31797388		57.00000000	0.60245614	5.38000533	1.239211
58	0.26939544	8.92668530	2.40480831		58.00000000	0.59206897	5.28521333	1.260555
59	0.27953169	8.91540530	2.49213831		59.00000000	0.58203390	5.18906810	1.282021
60	0.28936279	8.91176510	2.57873321		60.00000000	0.57233333	5.10050023	1.303412
61	0.29950872	8.92003820	2.67162922		61.00000000	0.56295082	5.02154282	1.324798
62	0.30932346	8.91763780	2.75843458		62.00000000	0.55387097	4.93922068	1.346278
63	0.31947905	8.90955730	2.84641690		63.00000000	0.54507937	4.85641584	1.367675
64	0.32928115	8.91800210	2.93652999		64.00000000	0.53656250	4.78506550	1.389035
65	0.33945239	8.91942210	3.02771915		65.00000000	0.52830769	4.71219931	1.410406
66	0.34926113	8.90716270	3.11092571		66.00000000	0.52030303	4.63442374	1.431884
67	0.35940188	8.92177200	3.20650163		67.00000000	0.51253731	4.57274105	1.453258
68	0.36958426	8.91474630	3.29474991		68.00000000	0.50500000	4.50194688	1.474608
69	0.37940496	8.90694900	3.37934063		69.00000000	0.49768116	4.43282071	1.495991
70	0.38955757	8.91491990	3.47287453		70.00000000	0.49057143	4.37340499	1.517474
71	0.39936784	8.91649530	3.56096147		71.00000000	0.48366197	4.31256970	1.538854
72	0.40950781	8.91027360	3.64882663		72.00000000	0.47694444	4.24970549	1.560206
73	0.41932926	8.90913010	3.73585893		73.00000000	0.47041096	4.19095243	1.581571
74	0.42946774	8.90866470	3.82598410		74.00000000	0.46405405	4.13410197	1.603060
75	0.43930033	8.90037540	3.90993785		75.00000000	0.45786667	4.07518522	1.624451
76	0.44946933	8.92057040	4.00952280		76.00000000	0.45184211	4.03068931	1.645791
77	0.45959964	8.89189910	4.08671363		77.00000000	0.44597403	3.96555604	1.667177
78	0.46948060	8.89706420	4.17699904		78.00000000	0.44025641	3.91698955	1.688660
79	0.47961015	8.89243320	4.26490122		79.00000000	0.43468354	3.86539438	1.710049
80	0.48943084	8.87452130	4.34346441		80.00000000	0.42925000	3.80938827	1.731409
81	0.49956411	8.85768700	4.42498252		81.00000000	0.42395062	3.75522187	1.752783
82	0.50937366	8.83318810	4.49939335		82.00000000	0.41878049	3.69916682	1.774263
83	0.51950616	8.79356580	4.56831160		83.00000000	0.41373494	3.63820542	1.795645
84	0.52930301	8.73038200	4.62101747		84.00000000	0.40880952	3.56906331	1.817006
85	0.53940207	8.67529960	4.67947456		85.00000000	0.40400000	3.50482104	1.838379
86	0.54957408	8.55437470	4.70126261		86.00000000	0.39930233	3.41578171	1.859860
87	0.55936199	8.41957950	4.70959274		87.00000000	0.39471264	3.32331448	1.881251
88	0.56949157	8.19071580	4.66454360		88.00000000	0.39022727	3.19624069	1.902645
89	0.57931226	7.92519040	4.59115996		89.00000000	0.38584270	3.05787684	1.923996
90	0.58944851	7.50435830	4.42343282		90.00000000	0.38155556	2.86332960	1.945475
91	0.59924608	7.01365040	4.20290251		91.00000000	0.37736264	2.64668961	1.966868
92	0.60935777	6.32462880	3.85396170		92.00000000	0.37326087	2.36073645	1.988347
93	0.61912638	5.48730800	3.39733714		93.00000000	0.36924731	2.02617373	2.009851
94	0.62927455	4.41880320	2.78064040		94.00000000	0.36531915	1.61427342	2.031240
95	0.63934827	3.11808420	1.99354174		95.00000000	0.36147368	1.12710538	2.052583
96	0.64913476	1.57697690	1.02367052		96.00000000	0.35770833	0.56409778	2.073953
97	0.65922487	-0.29199409	-0.19248977		97.00000000	0.35402062	-0.10337193	2.095433
98	0.66899568	-2.40635780	-1.60984297		98.00000000	0.35040816	-0.84320742	2.116810
99	0.67902327	-4.98803090	-3.38698905		99.00000000	0.34686869	-1.73019173	2.138177
100	0.68897122	-7.91019490	-5.44989663		100.00000000	0.34340000	-2.71636093	2.159546
101	0.69517916	-9.99698930	-6.94969862		101.00000000	0.34000000	-3.39897636	2.181042
