# Supplementary material for: Study on the Electrical Injection Regeneration of Industrialized B-Doped Czochralski Silicon PERC Solar Cells
Source: Hindawi journal article supplement (doi:10.1155/2019/5357370), 2019-06-20
Supplement: f1 [file 5357370.f1.zip › section3.2/IVRawData_1-10-30min.csv]

13:00 02/04/2018
Test Lot:	JK-PERC
Recipe:	Recipe_YJX-LID
Cell Name:	1-10-30min
Test Order:	2
Test Condition:	Light
1	-0.29990777	8.91220470	-2.67283944		1.00000000	34.34000000	306.04510940	0.000000
2	-0.29010621	8.92142010	-2.58815937		2.00000000	17.17000000	153.18078312	0.061820
3	-0.27997124	8.90525820	-2.49321618		3.00000000	11.44666667	101.93552220	0.083243
4	-0.27017415	8.92968750	-2.41257073		4.00000000	8.58500000	76.66136719	0.104743
5	-0.25999972	8.90589430	-2.31553002		5.00000000	6.86800000	61.16568205	0.126136
6	-0.24981710	8.93247800	-2.23148575		6.00000000	5.72333333	51.12354909	0.147485
7	-0.23999026	8.90371510	-2.13680490		7.00000000	4.90571429	43.67908236	0.168864
8	-0.22984187	8.92851260	-2.05214603		8.00000000	4.29250000	38.32564034	0.190349
9	-0.21999940	8.91481780	-1.96125457		9.00000000	3.81555556	34.01498258	0.211720
10	-0.20986368	8.91433720	-1.87079561		10.00000000	3.43400000	30.61183394	0.233076
11	-0.20004649	8.91966440	-1.78434756		11.00000000	3.12181818	27.84557050	0.254437
12	-0.18992044	8.91499610	-1.69313998		12.00000000	2.86166667	25.51174717	0.275924
13	-0.18010849	8.91958900	-1.60649371		13.00000000	2.64153846	23.56143740	0.297308
14	-0.16997053	8.90028380	-1.51278595		14.00000000	2.45285714	21.83112469	0.318687
15	-0.16014516	8.92239950	-1.42887910		15.00000000	2.28933333	20.42634659	0.340034
16	-0.15002358	8.90332790	-1.33570913		16.00000000	2.14625000	19.10876751	0.361507
17	-0.13987297	8.90940760	-1.24618530		17.00000000	2.02000000	17.99700335	0.382881
18	-0.13007291	8.90835950	-1.15873624		18.00000000	1.90777778	16.99517029	0.404271
19	-0.11990964	8.90917400	-1.06829585		19.00000000	1.80736842	16.10215975	0.425687
20	-0.11006791	8.91493800	-0.98124859		20.00000000	1.71700000	15.30694855	0.447154
21	-0.09992399	8.91477780	-0.89080018		21.00000000	1.63523810	14.57778427	0.468534
22	-0.09012319	8.91525650	-0.80347136		22.00000000	1.56090909	13.91590492	0.489933
23	-0.07999267	8.91234110	-0.71292200		23.00000000	1.49304348	13.30651276	0.511293
24	-0.07016508	8.89519020	-0.62413176		24.00000000	1.43083333	12.72753464	0.532780
25	-0.06002266	8.92416670	-0.53565219		25.00000000	1.37360000	12.25823538	0.554174
26	-0.04984972	8.91580390	-0.44445028		26.00000000	1.32076923	11.77571946	0.575538
27	-0.04004371	8.91332440	-0.35692256		27.00000000	1.27185185	11.33642814	0.596907
28	-0.02988267	8.90949920	-0.26623965		28.00000000	1.22642857	10.92686438	0.618393
29	-0.02009081	8.90451910	-0.17889896		29.00000000	1.18413793	10.54417882	0.639766
30	-0.00992456	8.91915890	-0.08851874		30.00000000	1.14466667	10.20946389	0.661153
31	-0.00065370	8.91280360	-0.00582628		31.00000000	1.10774194	9.87308631	0.682629
32	0.00945280	8.90647510	0.08419110		32.00000000	1.07312500	9.55776109	0.704105
33	0.01930393	8.90795900	0.17195857		33.00000000	1.04060606	9.26967612	0.725489
34	0.02940364	8.90672870	0.26189024		34.00000000	1.01000000	8.99579599	0.746883
35	0.03926147	8.91376300	0.34996742		35.00000000	0.98114286	8.74567490	0.768382
36	0.04940882	8.91367630	0.44041419		36.00000000	0.95388889	8.50265678	0.789762
37	0.05924357	8.92143150	0.52853746		37.00000000	0.92810811	8.28005291	0.811119
38	0.06936041	8.90781210	0.61784945		38.00000000	0.90368421	8.04984915	0.832505
39	0.07955018	8.92045500	0.70962377		39.00000000	0.88051282	7.85457499	0.853991
40	0.08935739	8.91118140	0.79627992		40.00000000	0.85850000	7.65024923	0.875375
41	0.09951665	8.90999790	0.88669310		41.00000000	0.83756098	7.46266653	0.896729
42	0.10932238	8.91301730	0.97439226		42.00000000	0.81761905	7.28745272	0.918103
43	0.11947419	8.91669370	1.06531476		43.00000000	0.79860465	7.12091306	0.939592
44	0.12928587	8.91433720	1.15249784		44.00000000	0.78045455	6.95723499	0.960982
45	0.13944140	8.91908840	1.24369017		45.00000000	0.76311111	6.80625546	0.982333
46	0.14926277	8.91436200	1.33058236		46.00000000	0.74652174	6.65476502	1.003706
47	0.15943691	8.91424850	1.42126024		47.00000000	0.73063830	6.51309135	1.025196
48	0.16955747	8.90711120	1.51026724		48.00000000	0.71541667	6.37229580	1.046564
49	0.17937361	8.91322900	1.59879806		49.00000000	0.70081633	6.24653641	1.067932
50	0.18951797	8.90823750	1.68827109		50.00000000	0.68680000	6.11817752	1.089314
51	0.19931850	8.91675850	1.77727493		51.00000000	0.67333333	6.00395072	1.110808
52	0.20941524	8.90855980	1.86558819		52.00000000	0.66038462	5.88307584	1.132206
53	0.21926711	8.90886970	1.95342211		53.00000000	0.64792453	5.77227520	1.153550
54	0.22940701	8.90837960	2.04364473		54.00000000	0.63592593	5.66506955	1.174932
55	0.23919563	8.92219920	2.13415106		55.00000000	0.62436364	5.57069674	1.196405
56	0.24937721	8.90517520	2.22074775		56.00000000	0.61321429	5.46078065	1.217783
57	0.25949627	8.90183260	2.30999236		57.00000000	0.60245614	5.36296371	1.239144
58	0.26934144	8.92421050	2.40365971		58.00000000	0.59206897	5.28374808	1.260521
59	0.27945307	8.91660880	2.49177370		59.00000000	0.58203390	5.18976858	1.282001
60	0.28933024	8.91447260	2.57922650		60.00000000	0.57233333	5.10204982	1.303379
61	0.29946792	8.91053200	2.66841848		61.00000000	0.56295082	5.01619129	1.324761
62	0.30929151	8.89992810	2.75267220		62.00000000	0.55387097	4.92941179	1.346107
63	0.31944630	8.90806580	2.84564866		63.00000000	0.54507937	4.85560285	1.367573
64	0.32924682	8.89601330	2.92898409		64.00000000	0.53656250	4.77326714	1.388941
65	0.33937258	8.92209910	3.02791579		65.00000000	0.52830769	4.71361359	1.410315
66	0.34922817	8.90864280	3.11114902		66.00000000	0.52030303	4.63519384	1.431816
67	0.35936213	8.91622450	3.20415343		67.00000000	0.51253731	4.56989775	1.453189
68	0.36954445	8.89977930	3.28886405		68.00000000	0.50500000	4.49438855	1.474537
69	0.37934870	8.91583440	3.38221019		69.00000000	0.49768116	4.43724280	1.495921
70	0.38948861	8.90098760	3.46683329		70.00000000	0.49057143	4.36657020	1.517408
71	0.39929804	8.90850930	3.55715030		71.00000000	0.48366197	4.30870717	1.538784
72	0.40946475	8.90172390	3.64494215		72.00000000	0.47694444	4.24562776	1.560147
73	0.41929355	8.90511990	3.73385934		73.00000000	0.47041096	4.18906599	1.581521
74	0.42944238	8.90187260	3.82284136		74.00000000	0.46405405	4.13095007	1.603016
75	0.43925408	8.89702890	3.90805624		75.00000000	0.45786667	4.07365297	1.624405
76	0.44943640	8.91082100	4.00484731		76.00000000	0.45184211	4.02628412	1.645756
77	0.45957407	8.88139340	4.08165811		77.00000000	0.44597403	3.96087077	1.667193
78	0.46944529	8.89085580	4.17377038		78.00000000	0.44025641	3.91425626	1.688681
79	0.47957626	8.87442110	4.25596168		79.00000000	0.43468354	3.85756482	1.710052
80	0.48938423	8.87117670	4.34141398		80.00000000	0.42925000	3.80795260	1.731403
81	0.49951372	8.84053610	4.41596907		81.00000000	0.42395062	3.74795074	1.752781
82	0.50930011	8.81938650	4.49171451		82.00000000	0.41878049	3.69338698	1.774261
83	0.51945937	8.78057000	4.56114936		83.00000000	0.41373494	3.63282860	1.795647
84	0.52924198	8.72596070	4.61814472		84.00000000	0.40880952	3.56725584	1.817003
85	0.53937966	8.67221450	4.67761611		85.00000000	0.40400000	3.50357466	1.838373
86	0.54952180	8.54485420	4.69558366		86.00000000	0.39930233	3.41198015	1.859863
87	0.55934763	8.40128040	4.69923628		87.00000000	0.39471264	3.31609160	1.881235
88	0.56945258	8.18317320	4.65992909		88.00000000	0.39022727	3.19329736	1.902590
89	0.57924563	7.91454700	4.58446676		89.00000000	0.38584270	3.05377016	1.923970
90	0.58936250	7.48801990	4.41315813		90.00000000	0.38155556	2.85709559	1.945449
91	0.59917563	7.00742820	4.19868021		91.00000000	0.37736264	2.64434159	1.966836
92	0.60928357	6.29833750	3.83747356		92.00000000	0.37326087	2.35092293	1.988319
93	0.61906844	5.48436450	3.39519698		93.00000000	0.36924731	2.02508685	2.009697
94	0.62921059	4.40198330	2.76977451		94.00000000	0.36531915	1.60812879	2.031212
95	0.63931102	3.09831740	1.98078846		95.00000000	0.36147368	1.11996021	2.052602
96	0.64906317	1.57854040	1.02457244		96.00000000	0.35770833	0.56465706	2.073998
97	0.65914279	-0.27224353	-0.17944736		97.00000000	0.35402062	-0.09637982	2.095499
98	0.66894776	-2.36954950	-1.58510483		98.00000000	0.35040816	-0.83030949	2.116885
99	0.67896783	-4.91305590	-3.33580690		99.00000000	0.34686869	-1.70418525	2.138228
100	0.68890381	-7.78493070	-5.36306842		100.00000000	0.34340000	-2.67334520	2.159607
101	0.69561863	-9.99633410	-6.95363623		101.00000000	0.34000000	-3.39875359	2.181095
13:01 02/04/2018
Test Lot:	JK-PERC
Recipe:	Recipe_YJX-LID
Cell Name:	1-10-30min
Test Order:	3
Test Condition:	Light
1	-0.29994050	8.91342740	-2.67349787		1.00000000	34.34000000	306.08709692	0.000000
2	-0.29008016	8.90975090	-2.58454197		2.00000000	17.17000000	152.98042295	0.021601
3	-0.27999580	8.91048910	-2.49489952		3.00000000	11.44666667	101.99539856	0.042995
4	-0.27014142	8.91895010	-2.40937784		4.00000000	8.58500000	76.56918661	0.064362
5	-0.26001462	8.91413880	-2.31780641		5.00000000	6.86800000	61.22230528	0.085746
6	-0.24988633	8.90538020	-2.22533278		6.00000000	5.72333333	50.96845934	0.107230
7	-0.24002078	8.92277810	-2.14165216		7.00000000	4.90571429	43.77259999	0.128677
8	-0.22991928	8.91459940	-2.04963828		8.00000000	4.29250000	38.26591792	0.150045
9	-0.22006787	8.90547180	-1.95980821		9.00000000	3.81555556	33.97932240	0.171423
10	-0.20990908	8.91809080	-1.87198824		10.00000000	3.43400000	30.62472381	0.192912
11	-0.20008297	8.91442580	-1.78362479		11.00000000	3.12181818	27.82921654	0.214293
12	-0.18997329	8.90728280	-1.69214582		12.00000000	2.86166667	25.48967428	0.235669
13	-0.18019333	8.89685920	-1.60315469		13.00000000	2.64153846	23.50139576	0.257031
14	-0.17002858	8.91046050	-1.51503295		14.00000000	2.45285714	21.85608668	0.278511
15	-0.16019057	8.91424180	-1.42797748		15.00000000	2.28933333	20.40767089	0.299907
16	-0.15005484	8.92080880	-1.33861054		16.00000000	2.14625000	19.14628589	0.321296
17	-0.13990496	8.90401840	-1.24571634		17.00000000	2.02000000	17.98611717	0.342635
18	-0.13011310	8.92390350	-1.16111675		18.00000000	1.90777778	17.02482479	0.364097
19	-0.11992453	8.90452960	-1.06787153		19.00000000	1.80736842	16.09376560	0.385474
20	-0.11008354	8.91604140	-0.98150940		20.00000000	1.71700000	15.30884308	0.406844
21	-0.09993516	8.92026810	-0.89144841		21.00000000	1.63523810	14.58676222	0.428333
22	-0.09011724	8.91535190	-0.80342689		22.00000000	1.56090909	13.91605383	0.449721
23	-0.07996588	8.90954110	-0.71245931		23.00000000	1.49304348	13.30233223	0.471068
24	-0.07014350	8.91472910	-0.62531028		24.00000000	1.43083333	12.75549155	0.492450
25	-0.06000703	8.90768150	-0.53452349		25.00000000	1.37360000	12.23559131	0.513945
26	-0.04985046	8.91490270	-0.44441200		26.00000000	1.32076923	11.77452918	0.535336
27	-0.04003775	8.91208270	-0.35681975		27.00000000	1.27185185	11.33484889	0.556692
28	-0.02988640	8.91139510	-0.26632947		28.00000000	1.22642857	10.92918956	0.578057
29	-0.02003498	8.91680530	-0.17864805		29.00000000	1.18413793	10.55872738	0.599540
30	-0.00991935	8.89625360	-0.08824507		30.00000000	1.14466667	10.18324495	0.620916
31	-0.00066114	8.91855430	-0.00589642		31.00000000	1.10774194	9.87945660	0.642382
32	0.00947885	8.92157650	0.08456626		32.00000000	1.07312500	9.57396678	0.663769
33	0.01929351	8.89626980	0.17164023		33.00000000	1.04060606	9.25751227	0.685253
34	0.02946318	8.92321870	0.26290641		34.00000000	1.01000000	9.01245089	0.706627
35	0.03928677	8.91198060	0.35012297		35.00000000	0.98114286	8.74392611	0.727991
36	0.04938351	8.90702920	0.43986037		36.00000000	0.95388889	8.49631619	0.749365
37	0.05921603	8.90206910	0.52714523		37.00000000	0.92810811	8.26208251	0.770847
38	0.06937157	8.91374300	0.61836031		38.00000000	0.90368421	8.05520881	0.792236
39	0.07950850	8.91462610	0.70878853		39.00000000	0.88051282	7.84944257	0.813587
40	0.08935441	8.90779690	0.79595095		40.00000000	0.85850000	7.64734364	0.834969
41	0.09947348	8.90035720	0.88534947		41.00000000	0.83756098	7.45459186	0.856445
42	0.10931642	8.91790390	0.97487333		42.00000000	0.81761905	7.29144809	0.877828
43	0.11944889	8.90502450	1.06369529		43.00000000	0.79860465	7.11159398	0.899202
44	0.12926131	8.90699580	1.15132995		44.00000000	0.78045455	6.95150536	0.920582
45	0.13942429	8.91098790	1.24240816		45.00000000	0.76311111	6.80007388	0.942064
46	0.14921290	8.89661410	1.32748959		46.00000000	0.74652174	6.64151583	0.963457
47	0.15937290	8.92256450	1.42201498		47.00000000	0.73063830	6.51916734	0.984837
48	0.16953811	8.90235330	1.50928815		48.00000000	0.71541667	6.36889192	1.006174
49	0.17935425	8.90465930	1.59708849		49.00000000	0.70081633	6.24053062	1.027647
50	0.18949044	8.90936760	1.68823999		50.00000000	0.68680000	6.11895367	1.049024
51	0.19927831	8.91000650	1.77557104		51.00000000	0.67333333	5.99940438	1.070390
52	0.20944872	8.91064260	1.86632269		52.00000000	0.66038462	5.88445129	1.091879
53	0.21925966	8.91078760	1.95377626		53.00000000	0.64792453	5.77351785	1.113266
54	0.22939809	8.90586090	2.04298748		54.00000000	0.63592593	5.66346784	1.134643
55	0.23923209	8.91266350	2.13219512		55.00000000	0.62436364	5.56474299	1.156022
56	0.24939060	8.91598420	2.22356265		56.00000000	0.61321429	5.46740888	1.177511
57	0.25952232	8.91712090	2.31419190		57.00000000	0.60245614	5.37217424	1.198897
58	0.26935410	8.90448090	2.39845844		58.00000000	0.59206897	5.27206679	1.220251
59	0.27952081	8.91189580	2.49106033		59.00000000	0.58203390	5.18702545	1.241613
60	0.28931761	8.90958400	2.57769955		60.00000000	0.57233333	5.09925191	1.263089
61	0.29946569	8.90696910	2.66733165		61.00000000	0.56295082	5.01418556	1.284455
62	0.30925429	8.91250320	2.75622985		62.00000000	0.55387097	4.93637677	1.305813
63	0.31944406	8.89805890	2.84243206		63.00000000	0.54507937	4.85014830	1.327204
64	0.32925129	8.91115950	2.93401076		64.00000000	0.53656250	4.78139402	1.348683
65	0.33939195	8.90122130	3.02100285		65.00000000	0.52830769	4.70258368	1.370066
66	0.34921256	8.89746480	3.10710646		66.00000000	0.52030303	4.62937790	1.391425
67	0.35938075	8.91135980	3.20257117		67.00000000	0.51253731	4.56740441	1.412806
68	0.36953032	8.91328910	3.29373057		68.00000000	0.50500000	4.50121100	1.434282
69	0.37935168	8.90753650	3.37908894		69.00000000	0.49768116	4.43311309	1.455659
70	0.38950497	8.90471080	3.46842911		70.00000000	0.49057143	4.36839670	1.476998
71	0.39931816	8.90669540	3.55660522		71.00000000	0.48366197	4.30782986	1.498372
72	0.40944690	8.90294550	3.64528344		72.00000000	0.47694444	4.24621040	1.519853
73	0.41927123	8.90573880	3.73392006		73.00000000	0.47041096	4.18935713	1.541289
74	0.42942378	8.89690210	3.82054133		74.00000000	0.46405405	4.12864349	1.562678
75	0.43922430	8.90863320	3.91288818		75.00000000	0.45786667	4.07896619	1.584041
76	0.44939473	8.88733480	3.99392142		76.00000000	0.45184211	4.01567207	1.605526
77	0.45951751	8.89752010	4.08856628		77.00000000	0.44597403	3.96806286	1.626918
78	0.46940213	8.88114640	4.16882904		78.00000000	0.44025641	3.90998163	1.648302
79	0.47952789	8.87697790	4.25675848		79.00000000	0.43468354	3.85867622	1.669655
80	0.48931724	8.86197280	4.33631607		80.00000000	0.42925000	3.80400182	1.691128
81	0.49945790	8.83920760	4.41481207		81.00000000	0.42395062	3.74738752	1.712502
82	0.50929564	8.82733150	4.49572145		82.00000000	0.41878049	3.69671419	1.733879
83	0.51941323	8.77555850	4.55814119		83.00000000	0.41373494	3.63075517	1.755360
84	0.52922487	8.72498130	4.61747709		84.00000000	0.40880952	3.56685545	1.776732
85	0.53936034	8.66273210	4.67233413		85.00000000	0.40400000	3.49974377	1.798096
86	0.54947793	8.55306150	4.69971853		86.00000000	0.39930233	3.41525735	1.819476
87	0.55932832	8.39585300	4.69603835		87.00000000	0.39471264	3.31394933	1.840964
88	0.56942654	8.19070630	4.66400555		88.00000000	0.39022727	3.19623698	1.862351
89	0.57926649	7.88066390	4.56500452		89.00000000	0.38584270	3.04069661	1.883705
90	0.58938408	7.51265860	4.42784138		90.00000000	0.38155556	2.86649663	1.905074
91	0.59918386	6.99197340	4.18947761		91.00000000	0.37736264	2.63850952	1.926566
92	0.60928506	6.31354330	3.84674761		92.00000000	0.37326087	2.35659866	1.947946
93	0.61906695	5.47556780	3.38974306		93.00000000	0.36924731	2.02183869	1.969286
94	0.62919122	4.40249970	2.77001416		94.00000000	0.36531915	1.60831744	1.990763
95	0.63932371	3.10101440	1.98255203		95.00000000	0.36147368	1.12093510	2.012263
96	0.64906096	1.57352230	1.02131189		96.00000000	0.35770833	0.56286204	2.033643
97	0.65914208	-0.28196347	-0.18585399		97.00000000	0.35402062	-0.09982088	2.055010
98	0.66893512	-2.40027810	-1.60563032		98.00000000	0.35040816	-0.84107704	2.076382
99	0.67897904	-4.93808790	-3.35285818		99.00000000	0.34686869	-1.71286807	2.097865
100	0.68888223	-7.82727050	-5.39206756		100.00000000	0.34340000	-2.68788469	2.119242
101	0.69545639	-9.99661730	-6.95221138		101.00000000	0.34000000	-3.39884988	2.140652
13:01 02/04/2018
Test Lot:	JK-PERC
Recipe:	Recipe_YJX-LID
Cell Name:	1-10-30min
Test Order:	4
Test Condition:	Light
1	-0.29989749	8.90098190	-2.66938213		1.00000000	34.34000000	305.65971845	0.000000
2	-0.29012185	8.91326140	-2.58593189		2.00000000	17.17000000	153.04069824	0.061716
3	-0.27996218	8.91004560	-2.49447579		3.00000000	11.44666667	101.99032197	0.083197
4	-0.27016053	8.91289620	-2.40791276		4.00000000	8.58500000	76.51721388	0.104640
5	-0.26000234	8.91529080	-2.31799647		5.00000000	6.86800000	61.23021721	0.126013
6	-0.24982703	8.91414070	-2.22699330		6.00000000	5.72333333	51.01859861	0.147403
7	-0.24000676	8.90737060	-2.13782916		7.00000000	4.90571429	43.69701520	0.168924
8	-0.22988504	8.91440960	-2.04928941		8.00000000	4.29250000	38.26510321	0.190319
9	-0.22004764	8.92257210	-1.96339093		9.00000000	3.81555556	34.04456955	0.211738
10	-0.20989020	8.91903880	-1.87201884		10.00000000	3.43400000	30.62797924	0.233124
11	-0.20005207	8.90173820	-1.78081115		11.00000000	3.12181818	27.78960816	0.254619
12	-0.18994226	8.92089840	-1.69445560		12.00000000	2.86166667	25.52863759	0.275992
13	-0.18014729	8.91083340	-1.60526249		13.00000000	2.64153846	23.53830915	0.297324
14	-0.17000994	8.91067790	-1.51490382		14.00000000	2.45285714	21.85661993	0.318701
15	-0.16015990	8.90357400	-1.42599552		15.00000000	2.28933333	20.38324874	0.340183
16	-0.15003520	8.89966010	-1.33526228		16.00000000	2.14625000	19.10089549	0.361570
17	-0.13983980	8.91485500	-1.24665154		17.00000000	2.02000000	18.00800710	0.382940
18	-0.13004558	8.91807750	-1.15975656		18.00000000	1.90777778	17.01371008	0.404315
19	-0.11989632	8.90443330	-1.06760878		19.00000000	1.80736842	16.09359155	0.425796
20	-0.11003287	8.90879920	-0.98026074		20.00000000	1.71700000	15.29640823	0.447188
21	-0.09991562	8.91390710	-0.89063859		21.00000000	1.63523810	14.57636047	0.468548
22	-0.09007451	8.90814500	-0.80239679		22.00000000	1.56090909	13.90480451	0.489919
23	-0.07994758	8.91194150	-0.71248818		23.00000000	1.49304348	13.30591614	0.511392
24	-0.07009828	8.91404250	-0.62485906		24.00000000	1.43083333	12.75450914	0.532758
25	-0.05995870	8.90602490	-0.53399368		25.00000000	1.37360000	12.23331580	0.554111
26	-0.04981093	8.91260240	-0.44394502		26.00000000	1.32076923	11.77149102	0.575482
27	-0.04002564	8.90991020	-0.35662486		27.00000000	1.27185185	11.33208579	0.596964
28	-0.02991062	8.91219810	-0.26656939		28.00000000	1.22642857	10.93017438	0.618356
29	-0.02001368	8.89894770	-0.17810073		29.00000000	1.18413793	10.53758152	0.639702
30	-0.00987634	8.92625520	-0.08815871		30.00000000	1.14466667	10.21758679	0.661083
31	-0.00061131	8.90108680	-0.00544131		31.00000000	1.10774194	9.86010712	0.682661
32	0.00951764	8.90128710	0.08471926		32.00000000	1.07312500	9.55219372	0.704040
33	0.01933168	8.91888520	0.17241705		33.00000000	1.04060606	9.28104599	0.725417
34	0.02946204	8.90087700	0.26223800		34.00000000	1.01000000	8.98988577	0.746778
35	0.03925450	8.90150740	0.34942420		35.00000000	0.98114286	8.73365040	0.768253
36	0.04942951	8.91719820	0.44077277		36.00000000	0.95388889	8.50601628	0.789617
37	0.05923984	8.90826510	0.52772415		37.00000000	0.92810811	8.26783307	0.811009
38	0.06938954	8.90994740	0.61825719		38.00000000	0.90368421	8.05177878	0.832409
39	0.07952660	8.91163730	0.70871224		39.00000000	0.88051282	7.84681089	0.853882
40	0.08936446	8.91303630	0.79650869		40.00000000	0.85850000	7.65184166	0.875258
41	0.09949854	8.90619560	0.88615346		41.00000000	0.83756098	7.45948188	0.896617
42	0.10931928	8.91423420	0.97449766		42.00000000	0.81761905	7.28844768	0.917993
43	0.11947197	8.90554430	1.06396292		43.00000000	0.79860465	7.11200910	0.939486
44	0.12932768	8.91765690	1.15329988		44.00000000	0.78045455	6.95982586	0.960866
45	0.13944837	8.91906550	1.24374915		45.00000000	0.76311111	6.80623798	0.982238
46	0.14928399	8.90640070	1.32958303		46.00000000	0.74652174	6.64882174	1.003610
47	0.15940766	8.90924450	1.42020182		47.00000000	0.73063830	6.50943524	1.025099
48	0.16957225	8.90237710	1.50959612		48.00000000	0.71541667	6.36890895	1.046482
49	0.17936844	8.90906620	1.59800531		49.00000000	0.70081633	6.24361905	1.067871
50	0.18953153	8.90721320	1.68819775		50.00000000	0.68680000	6.11747403	1.089207
51	0.19932623	8.90696810	1.77539237		51.00000000	0.67333333	5.99735852	1.110682
52	0.20948040	8.91394040	1.86729580		52.00000000	0.66038462	5.88662910	1.132075
53	0.21930040	8.90715980	1.95334371		53.00000000	0.64792453	5.77116731	1.153459
54	0.22944491	8.90810970	2.04392043		54.00000000	0.63592593	5.66489791	1.174932
55	0.23927160	8.91929630	2.13413430		55.00000000	0.62436364	5.56888427	1.196307
56	0.24940270	8.91614720	2.22371119		56.00000000	0.61321429	5.46750884	1.217668
57	0.25956580	8.90019890	2.31018725		57.00000000	0.60245614	5.36197948	1.239048
58	0.26940218	8.91524600	2.40178671		58.00000000	0.59206897	5.27844048	1.260536
59	0.27953997	8.91559790	2.49226597		59.00000000	0.58203390	5.18918020	1.281928
60	0.28934732	8.91728690	2.58019307		60.00000000	0.57233333	5.10366054	1.303267
61	0.29949927	8.90771390	2.66785381		61.00000000	0.56295082	5.01460484	1.324631
62	0.30932000	8.91029740	2.75613319		62.00000000	0.55387097	4.93515504	1.346114
63	0.31945482	8.90998080	2.84633631		63.00000000	0.54507937	4.85664668	1.367498
64	0.32929194	8.90732190	2.93310931		64.00000000	0.53656250	4.77933491	1.388854
65	0.33942750	8.90061660	3.02111404		65.00000000	0.52830769	4.70226422	1.410229
66	0.34925717	8.91673090	3.11423220		66.00000000	0.52030303	4.63940211	1.431697
67	0.35938680	8.90298460	3.19961515		67.00000000	0.51253731	4.56311181	1.453075
68	0.36954990	8.91513920	3.29458880		68.00000000	0.50500000	4.50214530	1.474433
69	0.37937808	8.91045480	3.38043123		69.00000000	0.49768116	4.43456548	1.495807
70	0.38948908	8.90276910	3.46753135		70.00000000	0.49057143	4.36744416	1.517276
71	0.39933366	8.90221690	3.55495486		71.00000000	0.48366197	4.30566378	1.538651
72	0.40947965	8.90184310	3.64512360		72.00000000	0.47694444	4.24568461	1.559996
73	0.41931376	8.91059970	3.73633706		73.00000000	0.47041096	4.19164375	1.581379
74	0.42945158	8.90308670	3.82344465		74.00000000	0.46405405	4.13151348	1.602845
75	0.43923807	8.89675620	3.90779402		75.00000000	0.45786667	4.07352811	1.624227
76	0.44942278	8.90491200	4.00207031		76.00000000	0.45184211	4.02361419	1.645591
77	0.45958662	8.89737890	4.08911630		77.00000000	0.44597403	3.96799989	1.666949
78	0.46942374	8.89025120	4.17329497		78.00000000	0.44025641	3.91399008	1.688429
79	0.47956303	8.88009930	4.25856733		79.00000000	0.43468354	3.86003304	1.709822
80	0.48937112	8.87543200	4.34338010		80.00000000	0.42925000	3.80977919	1.731205
81	0.49949327	8.84816930	4.41960102		81.00000000	0.42395062	3.75118684	1.752553
82	0.50934231	8.81686970	4.49080478		82.00000000	0.41878049	3.69233299	1.774031
83	0.51949126	8.77603240	4.55907213		83.00000000	0.41373494	3.63095124	1.795398
84	0.52925617	8.74685760	4.62932835		84.00000000	0.40880952	3.57579869	1.816777
85	0.53940815	8.65496830	4.66856044		85.00000000	0.40400000	3.49660719	1.838253
86	0.54954666	8.53948120	4.69284337		86.00000000	0.39930233	3.40983470	1.859640
87	0.55934435	8.40163330	4.69940612		87.00000000	0.39471264	3.31623089	1.881001
88	0.56947696	8.17414090	4.65498491		88.00000000	0.39022727	3.18977271	1.902375
89	0.57930142	7.90176630	4.57750444		89.00000000	0.38584270	3.04883882	1.923854
90	0.58940125	7.50613740	4.42412677		90.00000000	0.38155556	2.86400843	1.945237
91	0.59921455	6.98936180	4.18812729		91.00000000	0.37736264	2.63752400	1.966592
92	0.60932553	6.30665250	3.84280438		92.00000000	0.37326087	2.35402660	1.988058
93	0.61912918	5.47870250	3.39202459		93.00000000	0.36924731	2.02299617	2.009584
94	0.62924016	4.40204430	2.76994306		94.00000000	0.36531915	1.60815108	2.030968
95	0.63935417	3.09912490	1.98143843		95.00000000	0.36147368	1.12025210	2.052312
96	0.64910269	1.56836870	1.01803234		96.00000000	0.35770833	0.56101855	2.073698
97	0.65918690	-0.28194708	-0.18585582		97.00000000	0.35402062	-0.09981508	2.095173
98	0.66896522	-2.40593000	-1.60948349		98.00000000	0.35040816	-0.84305751	2.116556
99	0.67901742	-4.94601770	-3.35843218		99.00000000	0.34686869	-1.71561866	2.137911
100	0.68892306	-7.83902550	-5.40048543		100.00000000	0.34340000	-2.69192136	2.159286
101	0.69542801	-9.99688630	-6.95211475		101.00000000	0.34000000	-3.39894134	2.180760
