# Supplementary material for: Study on the Electrical Injection Regeneration of Industrialized B-Doped Czochralski Silicon PERC Solar Cells
Source: Hindawi journal article supplement (doi:10.1155/2019/5357370), 2019-06-20
Supplement: f1 [file 5357370.f1.zip › section3.2/IVRawData_1-10-40min.csv]

13:28 02/04/2018
Test Lot:	JK-PERC
Recipe:	Recipe_YJX-LID
Cell Name:	1-10-40min
Test Order:	2
Test Condition:	Light
1	-0.29987866	8.93159390	-2.67839441		1.00000000	34.34000000	306.71093453	0.000000
2	-0.29009327	8.91741850	-2.58688309		2.00000000	17.17000000	153.11207565	0.061803
3	-0.27996629	8.92782690	-2.49949057		3.00000000	11.44666667	102.19385858	0.083222
4	-0.27015787	8.91177270	-2.40758553		4.00000000	8.58500000	76.50756863	0.104712
5	-0.25999066	8.94660470	-2.32603366		5.00000000	6.86800000	61.44528108	0.126093
6	-0.24980786	8.93801690	-2.23278687		6.00000000	5.72333333	51.15525006	0.147434
7	-0.24001729	8.92675400	-2.14257530		7.00000000	4.90571429	43.79210462	0.168802
8	-0.22987616	8.93849280	-2.05474640		8.00000000	4.29250000	38.36848034	0.190285
9	-0.22004464	8.92279530	-1.96341328		9.00000000	3.81555556	34.04542118	0.211675
10	-0.20988937	8.93826580	-1.87604698		10.00000000	3.43400000	30.69400476	0.233015
11	-0.20007797	8.92508030	-1.78571195		11.00000000	3.12181818	27.86247795	0.254399
12	-0.18991598	8.92017080	-1.69408298		12.00000000	2.86166667	25.52655544	0.275886
13	-0.18011425	8.92821410	-1.60809859		13.00000000	2.64153846	23.58422094	0.297266
14	-0.16999546	8.92980480	-1.51802627		14.00000000	2.45285714	21.90353549	0.318638
15	-0.16017213	8.91390900	-1.42775979		15.00000000	2.28933333	20.40690900	0.340010
16	-0.15002280	8.92951970	-1.33963155		16.00000000	2.14625000	19.16498166	0.361488
17	-0.13987200	8.91775420	-1.24734412		17.00000000	2.02000000	18.01386348	0.382864
18	-0.13006505	8.92889880	-1.16133767		18.00000000	1.90777778	17.03435471	0.404213
19	-0.11989713	8.92700770	-1.07032260		19.00000000	1.80736842	16.13439181	0.425582
20	-0.11006413	8.91310790	-0.98101347		20.00000000	1.71700000	15.30380626	0.447069
21	-0.09992821	8.92758180	-0.89211725		21.00000000	1.63523810	14.59872186	0.468443
22	-0.09009522	8.93725780	-0.80520416		22.00000000	1.56090909	13.95024695	0.489844
23	-0.07993473	8.91884710	-0.71292564		23.00000000	1.49304348	13.31622650	0.511219
24	-0.07011885	8.92822270	-0.62603673		24.00000000	1.43083333	12.77479865	0.532700
25	-0.05997325	8.91631510	-0.53474040		25.00000000	1.37360000	12.24745042	0.554090
26	-0.04980234	8.91999340	-0.44423658		26.00000000	1.32076923	11.78125282	0.575466
27	-0.03999168	8.93301870	-0.35724643		27.00000000	1.27185185	11.36147638	0.596809
28	-0.02984683	8.91814420	-0.26617829		28.00000000	1.22642857	10.93746685	0.618299
29	-0.02004509	8.91374210	-0.17867678		29.00000000	1.18413793	10.55510013	0.639672
30	-0.00989577	8.92605780	-0.08833021		30.00000000	1.14466667	10.21736083	0.661057
31	-0.00068501	8.91151710	-0.00610451		31.00000000	1.10774194	9.87166120	0.682649
32	0.00949536	8.92875000	0.08478171		32.00000000	1.07312500	9.58166484	0.704114
33	0.01930203	8.91838170	0.17214283		33.00000000	1.04060606	9.28052205	0.725494
34	0.02944659	8.92404560	0.26278274		34.00000000	1.01000000	9.01328606	0.746872
35	0.03925474	8.93103120	0.35058534		35.00000000	0.98114286	8.76261747	0.768221
36	0.04940006	8.92795750	0.44104162		36.00000000	0.95388889	8.51627946	0.789721
37	0.05925063	8.92890550	0.52904328		37.00000000	0.92810811	8.28698959	0.811098
38	0.06935873	8.92309760	0.61889471		38.00000000	0.90368421	8.06366241	0.832499
39	0.07952935	8.92325970	0.70966100		39.00000000	0.88051282	7.85704457	0.853875
40	0.08930624	8.92150400	0.79674593		40.00000000	0.85850000	7.65911118	0.875347
41	0.09947686	8.92110820	0.88744382		41.00000000	0.83756098	7.47197209	0.896720
42	0.10929989	8.91752340	0.97468433		42.00000000	0.81761905	7.29113699	0.918109
43	0.11945637	8.92264180	1.06586640		43.00000000	0.79860465	7.12566324	0.939454
44	0.12927717	8.92445760	1.15372862		44.00000000	0.78045455	6.96513350	0.960926
45	0.13941579	8.92015550	1.24361053		45.00000000	0.76311111	6.80706977	0.982296
46	0.14924106	8.92806430	1.33243378		46.00000000	0.74652174	6.66499409	1.003685
47	0.15939009	8.93524840	1.42419005		47.00000000	0.73063830	6.52843468	1.025179
48	0.16955252	8.90942670	1.51061575		48.00000000	0.71541667	6.37395235	1.046542
49	0.17934132	8.92696760	1.60097415		49.00000000	0.70081633	6.25616464	1.067896
50	0.18948738	8.91777230	1.68980531		50.00000000	0.68680000	6.12472602	1.089264
51	0.19930595	8.92729950	1.77926391		51.00000000	0.67333333	6.01104833	1.110737
52	0.20945498	8.92208100	1.86877430		52.00000000	0.66038462	5.89200503	1.132109
53	0.21927504	8.92361640	1.95672634		53.00000000	0.64792453	5.78182995	1.153463
54	0.22943300	8.91067600	2.04440313		54.00000000	0.63592593	5.66652989	1.174836
55	0.23926125	8.93078420	2.13679059		55.00000000	0.62436364	5.57605690	1.196314
56	0.24939764	8.91019060	2.22218051		56.00000000	0.61321429	5.46385616	1.217705
57	0.25955263	8.92386530	2.31621271		57.00000000	0.60245614	5.37623745	1.239057
58	0.26936600	8.91267590	2.40077186		58.00000000	0.59206897	5.27691880	1.260431
59	0.27950385	8.92155080	2.49360780		59.00000000	0.58203390	5.19264499	1.281913
60	0.28934997	8.91959000	2.58088310		60.00000000	0.57233333	5.10497868	1.303285
61	0.29947072	8.91325280	2.66925823		61.00000000	0.56295082	5.01772297	1.324657
62	0.30930790	8.93174360	2.76265886		62.00000000	0.55387097	4.94703347	1.346034
63	0.31944874	8.91151430	2.84677201		63.00000000	0.54507937	4.85748256	1.367504
64	0.32926360	8.92709260	2.93936665		64.00000000	0.53656250	4.78994312	1.388890
65	0.33942676	8.92481800	3.02932206		65.00000000	0.52830769	4.71505000	1.410237
66	0.34926170	8.91568280	3.11390653		66.00000000	0.52030303	4.63885678	1.431603
67	0.35937873	8.92036060	3.20578786		67.00000000	0.51253731	4.57201766	1.453079
68	0.36955160	8.91111660	3.29311740		68.00000000	0.50500000	4.50011388	1.474446
69	0.37937835	8.93268490	3.38886726		69.00000000	0.49768116	4.44562898	1.495805
70	0.38951397	8.90405270	3.46825292		70.00000000	0.49057143	4.36807385	1.517177
71	0.39931470	8.93043040	3.56605214		71.00000000	0.48366197	4.31930958	1.538654
72	0.40945628	8.91158580	3.64890477		72.00000000	0.47694444	4.25033134	1.560028
73	0.41928825	8.91232200	3.73683189		73.00000000	0.47041096	4.19245394	1.581408
74	0.42945811	8.91074940	3.82679360		74.00000000	0.46405405	4.13506938	1.602752
75	0.43925512	8.90576460	3.91190270		75.00000000	0.45786667	4.07765275	1.624219
76	0.44942349	8.91460990	4.00643509		76.00000000	0.45184211	4.02799610	1.645590
77	0.45956063	8.90611550	4.09290005		77.00000000	0.44597403	3.97189619	1.666968
78	0.46943054	8.89918140	4.17754753		78.00000000	0.44025641	3.91792166	1.688455
79	0.47955650	8.89028640	4.26339463		79.00000000	0.43468354	3.86446120	1.709837
80	0.48936540	8.86774160	4.33956592		80.00000000	0.42925000	3.80647808	1.731179
81	0.49950773	8.86072730	4.42600178		81.00000000	0.42395062	3.75651081	1.752554
82	0.50932485	8.83322530	4.49898115		82.00000000	0.41878049	3.69918240	1.774036
83	0.51943964	8.79485990	4.56839886		83.00000000	0.41373494	3.63874083	1.795421
84	0.52924925	8.73849770	4.62484335		84.00000000	0.40880952	3.57238108	1.816792
85	0.53938788	8.66637130	4.67453564		85.00000000	0.40400000	3.50121401	1.838166
86	0.54952353	8.55292610	4.70003414		86.00000000	0.39930233	3.41520328	1.859641
87	0.55934209	8.40354730	4.70045771		87.00000000	0.39471264	3.31698637	1.881012
88	0.56947398	8.18134310	4.65906202		88.00000000	0.39022727	3.19258321	1.902360
89	0.57925832	7.91390090	4.58419294		89.00000000	0.38584270	3.05352086	1.923741
90	0.58939022	7.49419640	4.41700606		90.00000000	0.38155556	2.85945227	1.945214
91	0.59919912	6.99243550	4.18986120		91.00000000	0.37736264	2.63868390	1.966579
92	0.60933030	6.30725190	3.84319969		92.00000000	0.37326087	2.35425033	1.988055
93	0.61910272	5.46728470	3.38481083		93.00000000	0.36924731	2.01878018	2.009498
94	0.62921160	4.39071230	2.76268711		94.00000000	0.36531915	1.60401128	2.030993
95	0.63932413	3.07558160	1.96629353		95.00000000	0.36147368	1.11174181	2.052381
96	0.64911294	1.55178810	1.00728574		96.00000000	0.35770833	0.55508753	2.073725
97	0.65919125	-0.28540775	-0.18813829		97.00000000	0.35402062	-0.10104023	2.095101
98	0.66894805	-2.40857770	-1.61121336		98.00000000	0.35040816	-0.84398529	2.116591
99	0.67897505	-4.93525840	-3.35091732		99.00000000	0.34686869	-1.71188660	2.137956
100	0.68888593	-7.80228470	-5.37488415		100.00000000	0.34340000	-2.67930457	2.159298
101	0.69559115	-9.99674700	-6.95364874		101.00000000	0.34000000	-3.39889398	2.180661
13:29 02/04/2018
Test Lot:	JK-PERC
Recipe:	Recipe_YJX-LID
Cell Name:	1-10-40min
Test Order:	3
Test Condition:	Light
1	-0.29992715	8.92496110	-2.67683815		1.00000000	34.34000000	306.48316417	0.000000
2	-0.29007190	8.92858980	-2.58993301		2.00000000	17.17000000	153.30388687	0.061755
3	-0.27996436	8.92992780	-2.50006152		3.00000000	11.44666667	102.21790688	0.083274
4	-0.27012476	8.91875650	-2.40917696		4.00000000	8.58500000	76.56752455	0.104653
5	-0.25997329	8.93024350	-2.32162478		5.00000000	6.86800000	61.33291236	0.126015
6	-0.24982631	8.92845630	-2.23056329		6.00000000	5.72333333	51.10053156	0.147390
7	-0.23999788	8.92508510	-2.14200150		7.00000000	4.90571429	43.78391748	0.168927
8	-0.22983822	8.91571900	-2.04917298		8.00000000	4.29250000	38.27072381	0.190309
9	-0.21999268	8.92176910	-1.96272389		9.00000000	3.81555556	34.04150565	0.211656
10	-0.20986429	8.91634180	-1.87122174		10.00000000	3.43400000	30.61871774	0.233035
11	-0.20006116	8.92109490	-1.78476459		11.00000000	3.12181818	27.85003626	0.254519
12	-0.18989779	8.92229270	-1.69432367		12.00000000	2.86166667	25.53262761	0.275893
13	-0.18011774	8.92089750	-1.60681190		13.00000000	2.64153846	23.56489386	0.297253
14	-0.16997297	8.90652560	-1.51386861		14.00000000	2.45285714	21.84643494	0.318622
15	-0.16013487	8.92201230	-1.42872528		15.00000000	2.28933333	20.42546016	0.340095
16	-0.14999680	8.91618160	-1.33739871		16.00000000	2.14625000	19.13635476	0.361490
17	-0.13985056	8.91944220	-1.24738899		17.00000000	2.02000000	18.01727324	0.382861
18	-0.13005413	8.92445760	-1.16066257		18.00000000	1.90777778	17.02588189	0.404230
19	-0.11987513	8.91250130	-1.06838725		19.00000000	1.80736842	16.10817340	0.425712
20	-0.11006605	8.92684360	-0.98254241		20.00000000	1.71700000	15.32739046	0.447083
21	-0.09992798	8.91161540	-0.89051976		21.00000000	1.63523810	14.57261299	0.468463
22	-0.09007722	8.90942960	-0.80253666		22.00000000	1.56090909	13.90680966	0.489814
23	-0.07994586	8.92701910	-0.71367817		23.00000000	1.49304348	13.32842765	0.511294
24	-0.07014199	8.90560250	-0.62465665		24.00000000	1.43083333	12.74243291	0.532678
25	-0.05998085	8.93638800	-0.53601216		25.00000000	1.37360000	12.27502256	0.554054
26	-0.04983758	8.91930200	-0.44451641		26.00000000	1.32076923	11.78033964	0.575519
27	-0.04000542	8.91525550	-0.35665857		27.00000000	1.27185185	11.33888422	0.597012
28	-0.02990904	8.92406370	-0.26691019		28.00000000	1.22642857	10.94472669	0.618395
29	-0.02003297	8.93168830	-0.17892826		29.00000000	1.18413793	10.57635090	0.639765
30	-0.00990905	8.92338560	-0.08842229		30.00000000	1.14466667	10.21430205	0.661117
31	-0.00066117	8.92199610	-0.00589894		31.00000000	1.10774194	9.88326923	0.682726
32	0.00949901	8.91141700	0.08464968		32.00000000	1.07312500	9.56306437	0.704099
33	0.01930112	8.91915040	0.17214957		33.00000000	1.04060606	9.28132196	0.725509
34	0.02943889	8.92717930	0.26280626		34.00000000	1.01000000	9.01645109	0.746863
35	0.03928193	8.90823080	0.34993251		35.00000000	0.98114286	8.74024702	0.768341
36	0.04941673	8.92968270	0.44127570		36.00000000	0.95388889	8.51792511	0.789736
37	0.05922777	8.91031360	0.52773796		37.00000000	0.92810811	8.26973430	0.811118
38	0.06940275	8.91522500	0.61874111		38.00000000	0.90368421	8.05654807	0.832461
39	0.07953606	8.91927530	0.70940400		39.00000000	0.88051282	7.85353625	0.853928
40	0.08934486	8.92157840	0.79709716		40.00000000	0.85850000	7.65917506	0.875314
41	0.09949975	8.90898040	0.88644130		41.00000000	0.83756098	7.46181432	0.896707
42	0.10933684	8.92714790	0.97606614		42.00000000	0.81761905	7.29900616	0.918189
43	0.11947758	8.91669370	1.06534498		43.00000000	0.79860465	7.12091306	0.939563
44	0.12930128	8.91601470	1.15285211		44.00000000	0.78045455	6.95854420	0.960922
45	0.13944128	8.91505340	1.24312646		45.00000000	0.76311111	6.80317631	0.982304
46	0.14927018	8.91392990	1.33058392		46.00000000	0.74652174	6.65444245	1.003782
47	0.15943995	8.91510010	1.42142311		47.00000000	0.73063830	6.51371356	1.025164
48	0.16957401	8.92323400	1.51314857		48.00000000	0.71541667	6.38383032	1.046510
49	0.17939845	8.91320900	1.59901588		49.00000000	0.70081633	6.24652239	1.067880
50	0.18950942	8.90840440	1.68822655		50.00000000	0.68680000	6.11829214	1.089374
51	0.19930556	8.91709420	1.77722645		51.00000000	0.67333333	6.00417676	1.110759
52	0.20942026	8.91380500	1.86673136		52.00000000	0.66038462	5.88653969	1.132118
53	0.21926033	8.91112520	1.95385625		53.00000000	0.64792453	5.77373659	1.153490
54	0.22943458	8.92530820	2.04777434		54.00000000	0.63592593	5.67583488	1.174964
55	0.23924188	8.91168690	2.13204873		55.00000000	0.62436364	5.56413324	1.196345
56	0.24940571	8.91506860	2.22346901		56.00000000	0.61321429	5.46684742	1.217681
57	0.25953084	8.91746810	2.31435799		57.00000000	0.60245614	5.37238341	1.239052
58	0.26935750	8.91660400	2.40175416		58.00000000	0.59206897	5.27924451	1.260526
59	0.27952504	8.92388630	2.49444967		59.00000000	0.58203390	5.19400433	1.281900
60	0.28934425	8.92106150	2.58125785		60.00000000	0.57233333	5.10582087	1.303245
61	0.29949096	8.92566390	2.67315565		61.00000000	0.56295082	5.02470981	1.324626
62	0.30930349	8.89329620	2.75072755		62.00000000	0.55387097	4.92573857	1.346094
63	0.31941968	8.93550870	2.85417733		63.00000000	0.54507937	4.87056141	1.367459
64	0.32925305	8.90735340	2.93277327		64.00000000	0.53656250	4.77935181	1.388829
65	0.33941314	8.91440390	3.02566582		65.00000000	0.52830769	4.70954815	1.410189
66	0.34922716	8.89453130	3.10621191		66.00000000	0.52030303	4.62785159	1.431657
67	0.35935897	8.93198590	3.20978925		67.00000000	0.51253731	4.57797606	1.453035
68	0.36954662	8.91143700	3.29319142		68.00000000	0.50500000	4.50027569	1.474426
69	0.37938890	8.91212750	3.38116225		69.00000000	0.49768116	4.43539795	1.495779
70	0.38952595	8.91898160	3.47417478		70.00000000	0.49057143	4.37539754	1.517255
71	0.39934516	8.90120510	3.55465317		71.00000000	0.48366197	4.30517441	1.538632
72	0.40948218	8.91033740	3.64862438		72.00000000	0.47694444	4.24973592	1.560018
73	0.41929546	8.91250510	3.73697293		73.00000000	0.47041096	4.19254007	1.581507
74	0.42944664	8.90532880	3.82436353		74.00000000	0.46405405	4.13255393	1.602891
75	0.43929413	8.91224480	3.91509683		75.00000000	0.45786667	4.08061982	1.624262
76	0.44944680	8.90401360	4.00188042		76.00000000	0.45184211	4.02320825	1.645638
77	0.45956001	8.91072940	4.09501489		77.00000000	0.44597403	3.97395386	1.667107
78	0.46942613	8.88259030	4.16971999		78.00000000	0.44025641	3.91061732	1.688512
79	0.47956985	8.89387890	4.26523617		79.00000000	0.43468354	3.86602280	1.709857
80	0.48938090	8.87459180	4.34305572		80.00000000	0.42925000	3.80941853	1.731235
81	0.49951643	8.84120270	4.41632601		81.00000000	0.42395062	3.74823334	1.752730
82	0.50934607	8.84659000	4.50597585		82.00000000	0.41878049	3.70477928	1.774110
83	0.51947343	8.77678780	4.55930806		83.00000000	0.41373494	3.63126377	1.795480
84	0.52925247	8.74732400	4.62954283		84.00000000	0.40880952	3.57598936	1.816855
85	0.53937978	8.65960410	4.67081535		85.00000000	0.40400000	3.49848006	1.838334
86	0.54951537	8.55574230	4.70151190		86.00000000	0.39930233	3.41632780	1.859723
87	0.55936509	8.39964390	4.69846757		87.00000000	0.39471264	3.31544565	1.881075
88	0.56944406	8.18920990	4.66329693		88.00000000	0.39022727	3.19565305	1.902446
89	0.57927740	7.89927200	4.57586975		89.00000000	0.38584270	3.04787641	1.923937
90	0.58941150	7.51101110	4.42707632		90.00000000	0.38155556	2.86586801	1.945314
91	0.59918231	6.99288510	4.19001305		91.00000000	0.37736264	2.63885356	1.966667
92	0.60929924	6.30881360	3.84395533		92.00000000	0.37326087	2.35483325	1.988150
93	0.61908275	5.48466680	3.39546261		93.00000000	0.36924731	2.02519847	2.009656
94	0.62921083	4.39389750	2.76468789		94.00000000	0.36531915	1.60517490	2.031092
95	0.63931286	3.09456750	1.97839680		95.00000000	0.36147368	1.11860472	2.052463
96	0.64911205	1.56430520	1.01540936		96.00000000	0.35770833	0.55956501	2.073826
97	0.65919620	-0.30084649	-0.19831686		97.00000000	0.35402062	-0.10650586	2.095311
98	0.66892761	-2.41926430	-1.61831269		98.00000000	0.35040816	-0.84772996	2.116692
99	0.67897981	-4.96149060	-3.36875194		99.00000000	0.34686869	-1.72098573	2.138068
100	0.68890321	-7.86907390	-5.42103027		100.00000000	0.34340000	-2.70223998	2.159436
101	0.69535977	-9.99665550	-6.95127207		101.00000000	0.34000000	-3.39886287	2.180916
13:29 02/04/2018
Test Lot:	JK-PERC
Recipe:	Recipe_YJX-LID
Cell Name:	1-10-40min
Test Order:	4
Test Condition:	Light
1	-0.29990554	8.91964150	-2.67504990		1.00000000	34.34000000	306.30048911	0.000000
2	-0.29006505	8.92303280	-2.58825996		2.00000000	17.17000000	153.20847318	0.061721
3	-0.27994394	8.92468170	-2.49841056		3.00000000	11.44666667	102.15785653	0.083249
4	-0.27009231	8.92695620	-2.41110222		4.00000000	8.58500000	76.63791898	0.104653
5	-0.25992656	8.92054650	-2.31868697		5.00000000	6.86800000	61.26631336	0.126005
6	-0.24981514	8.91864200	-2.22801180		6.00000000	5.72333333	51.04436105	0.147383
7	-0.24001931	8.90756800	-2.13798833		7.00000000	4.90571429	43.69798359	0.168919
8	-0.22982825	8.93780040	-2.05415902		8.00000000	4.29250000	38.36550822	0.190296
9	-0.22001158	8.90927790	-1.96014431		9.00000000	3.81555556	33.99384479	0.211659
10	-0.20989272	8.92328450	-1.87293246		10.00000000	3.43400000	30.64255897	0.233032
11	-0.20005447	8.91645620	-1.78377692		11.00000000	3.12181818	27.83555508	0.254524
12	-0.18993114	8.91814990	-1.69383438		12.00000000	2.86166667	25.52077230	0.275905
13	-0.18010777	8.93093490	-1.60853077		13.00000000	2.64153846	23.59140804	0.297251
14	-0.16998892	8.91273400	-1.51506603		14.00000000	2.45285714	21.86166325	0.318623
15	-0.16015437	8.91345690	-1.42752907		15.00000000	2.28933333	20.40587400	0.340109
16	-0.15003701	8.93109990	-1.33999553		16.00000000	2.14625000	19.16837316	0.361494
17	-0.13987498	8.92009540	-1.24769817		17.00000000	2.02000000	18.01859271	0.382858
18	-0.13005905	8.91806790	-1.15987544		18.00000000	1.90777778	17.01369176	0.404225
19	-0.11988363	8.92781930	-1.07029939		19.00000000	1.80736842	16.13585867	0.425717
20	-0.11007068	8.91668800	-0.98146591		20.00000000	1.71700000	15.30995330	0.447097
21	-0.09993321	8.93868830	-0.89327179		21.00000000	1.63523810	14.61688363	0.468473
22	-0.09009570	8.92309280	-0.80393228		22.00000000	1.56090909	13.92813667	0.489830
23	-0.07993739	8.92132090	-0.71314712		23.00000000	1.49304348	13.31991999	0.511306
24	-0.07009988	8.91588880	-0.62500276		24.00000000	1.43083333	12.75715089	0.532688
25	-0.05994901	8.93154720	-0.53543745		25.00000000	1.37360000	12.26837323	0.554072
26	-0.04981155	8.91438290	-0.44403922		26.00000000	1.32076923	11.77384265	0.575515
27	-0.03997404	8.91948990	-0.35654803		27.00000000	1.27185185	11.34426975	0.596983
28	-0.02984178	8.90543460	-0.26575405		28.00000000	1.22642857	10.92187943	0.618391
29	-0.02000204	8.93083290	-0.17863487		29.00000000	1.18413793	10.57533799	0.639782
30	-0.00988392	8.91705040	-0.08813544		30.00000000	1.14466667	10.20705036	0.661136
31	-0.00063665	8.92143250	-0.00567982		31.00000000	1.10774194	9.88264490	0.682737
32	0.00950731	8.92179110	0.08482222		32.00000000	1.07312500	9.57419707	0.704124
33	0.01933189	8.92262550	0.17249118		33.00000000	1.04060606	9.28493817	0.725473
34	0.02945641	8.92458820	0.26288634		34.00000000	1.01000000	9.01383408	0.746852
35	0.03930034	8.91824340	0.35049001		35.00000000	0.98114286	8.75007081	0.768325
36	0.04944422	8.91886710	0.44098640		36.00000000	0.95388889	8.50760823	0.789700
37	0.05922488	8.91774270	0.52815225		37.00000000	0.92810811	8.27662931	0.811087
38	0.06941416	8.90982530	0.61846805		38.00000000	0.90368421	8.05166844	0.832437
39	0.07950668	8.92522430	0.70961495		39.00000000	0.88051282	7.85877442	0.853924
40	0.08936177	8.90995220	0.79620912		40.00000000	0.85850000	7.64919396	0.875311
41	0.09949374	8.92599490	0.88808063		41.00000000	0.83756098	7.47606500	0.896693
42	0.10931832	8.90768620	0.97377329		42.00000000	0.81761905	7.28309391	0.918179
43	0.11945847	8.93022060	1.06679049		43.00000000	0.79860465	7.13171571	0.939562
44	0.12928231	8.91163830	1.15211719		44.00000000	0.78045455	6.95512862	0.960921
45	0.13943064	8.91089530	1.24245183		45.00000000	0.76311111	6.80000321	0.982300
46	0.14925523	8.91760730	1.33099953		46.00000000	0.74652174	6.65718771	1.003785
47	0.15939017	8.92483710	1.42253130		47.00000000	0.73063830	6.52082779	1.025167
48	0.16956009	8.90887450	1.51058956		48.00000000	0.71541667	6.37355730	1.046525
49	0.17936756	8.91276740	1.59866134		49.00000000	0.70081633	6.24621291	1.067912
50	0.18951218	8.91460990	1.68942716		50.00000000	0.68680000	6.12255408	1.089399
51	0.19928242	8.91752530	1.77710602		51.00000000	0.67333333	6.00446704	1.110793
52	0.20942257	8.92419430	1.86892771		52.00000000	0.66038462	5.89340062	1.132140
53	0.21924789	8.91442680	1.95446927		53.00000000	0.64792453	5.77587578	1.153508
54	0.22940964	8.93214800	2.04912086		54.00000000	0.63592593	5.68018449	1.174993
55	0.23924910	8.92336460	2.13490695		55.00000000	0.62436364	5.57142437	1.196367
56	0.24939001	8.92531780	2.22588510		56.00000000	0.61321429	5.47313238	1.217714
57	0.25953016	8.92630670	2.31664581		57.00000000	0.60245614	5.37770828	1.239093
58	0.26936218	8.92711830	2.40462805		58.00000000	0.59206897	5.28546970	1.260576
59	0.27953881	8.91069320	2.49088457		59.00000000	0.58203390	5.18632550	1.281972
60	0.28932244	8.92133900	2.58114357		60.00000000	0.57233333	5.10597969	1.303324
61	0.29951173	8.91775230	2.67097142		61.00000000	0.56295082	5.02025597	1.324703
62	0.30932513	8.91721340	2.75831819		62.00000000	0.55387097	4.93898562	1.346190
63	0.31946751	8.91432670	2.84783775		63.00000000	0.54507937	4.85901554	1.367582
64	0.32926604	8.91604900	2.93575215		64.00000000	0.53656250	4.78401754	1.388944
65	0.33942854	8.91245560	3.02514179		65.00000000	0.52830769	4.70851885	1.410314
66	0.34925014	8.91343500	3.11301842		66.00000000	0.52030303	4.63768724	1.431797
67	0.35938954	8.91607380	3.20434366		67.00000000	0.51253731	4.56982051	1.453185
68	0.36955425	8.91804790	3.29570250		68.00000000	0.50500000	4.50361419	1.474621
69	0.37940413	8.91447350	3.38218806		69.00000000	0.49768116	4.43656551	1.495999
70	0.38951898	8.91592500	3.47292201		70.00000000	0.49057143	4.37389806	1.517481
71	0.39934060	8.90804000	3.55734204		71.00000000	0.48366197	4.30848019	1.538873
72	0.40947405	8.90841200	3.64776354		72.00000000	0.47694444	4.24881761	1.560258
73	0.41929862	8.90141960	3.73235295		73.00000000	0.47041096	4.18732533	1.581757
74	0.42944548	8.92267420	3.83180210		74.00000000	0.46405405	4.14060314	1.603136
75	0.43924400	8.89445020	3.90683388		75.00000000	0.45786667	4.07247226	1.624488
76	0.44941542	8.90184020	4.00062425		76.00000000	0.45184211	4.02222622	1.645868
77	0.45955035	8.89665990	4.08846317		77.00000000	0.44597403	3.96767923	1.667350
78	0.46940917	8.89899160	4.17726826		78.00000000	0.44025641	3.91783810	1.688734
79	0.47956124	8.88338760	4.26012837		79.00000000	0.43468354	3.86146241	1.710090
80	0.48937243	8.87320140	4.34230013		80.00000000	0.42925000	3.80882170	1.731470
81	0.49949026	8.85192200	4.42144882		81.00000000	0.42395062	3.75277780	1.752988
82	0.50933570	8.83409690	4.49952093		82.00000000	0.41878049	3.69954741	1.774375
83	0.51948100	8.78533170	4.56381290		83.00000000	0.41373494	3.63479868	1.795724
84	0.52924907	8.74167630	4.62652405		84.00000000	0.40880952	3.57368053	1.817099
85	0.53937954	8.67323680	4.67816648		85.00000000	0.40400000	3.50398767	1.838582
86	0.54953754	8.54638000	4.69655664		86.00000000	0.39930233	3.41258941	1.859971
87	0.55933905	8.40670590	4.70219889		87.00000000	0.39471264	3.31823311	1.881337
88	0.56945688	8.17860700	4.65736402		88.00000000	0.39022727	3.19151550	1.902710
89	0.57927400	7.90464540	4.57895556		89.00000000	0.38584270	3.04994970	1.924199
90	0.58939481	7.49958800	4.42021824		90.00000000	0.38155556	2.86150947	1.945593
91	0.59919411	7.00461580	4.19712453		91.00000000	0.37736264	2.64328029	1.966947
92	0.60932308	6.31633230	3.84868705		92.00000000	0.37326087	2.35763969	1.988425
93	0.61910748	5.48809390	3.39771998		93.00000000	0.36924731	2.02646392	2.009945
94	0.62923497	4.39608620	2.76617117		94.00000000	0.36531915	1.60597447	2.031322
95	0.63934016	3.10669680	1.98623603		95.00000000	0.36147368	1.12298914	2.052715
96	0.64914906	1.56030360	1.01286962		96.00000000	0.35770833	0.55813360	2.074076
97	0.65920961	-0.30866423	-0.20347443		97.00000000	0.35402062	-0.10927350	2.095546
98	0.66898954	-2.41266110	-1.61404504		98.00000000	0.35040816	-0.84541614	2.116930
99	0.67900985	-4.98916960	-3.38769530		99.00000000	0.34686869	-1.73058671	2.138320
100	0.68892670	-7.89859340	-5.44155189		100.00000000	0.34340000	-2.71237697	2.159796
101	0.69523305	-9.99711130	-6.95032218		101.00000000	0.34000000	-3.39901784	2.181299
