# Supplementary material for: Study on the Electrical Injection Regeneration of Industrialized B-Doped Czochralski Silicon PERC Solar Cells
Source: Hindawi journal article supplement (doi:10.1155/2019/5357370), 2019-06-20
Supplement: f1 [file 5357370.f1.zip › section3.2/IVRawData_1-10-50min.csv]

13:47 02/04/2018
Test Lot:	JK-PERC
Recipe:	Recipe_YJX-LID
Cell Name:	1-10-50min
Test Order:	2
Test Condition:	Light
1	-0.29992038	8.93324660	-2.67926271		1.00000000	34.34000000	306.76768824	0.000000
2	-0.29011816	8.91630360	-2.58678159		2.00000000	17.17000000	153.09293281	0.061739
3	-0.27998546	8.93164060	-2.50072950		3.00000000	11.44666667	102.23751273	0.083254
4	-0.27014974	8.91662790	-2.40882471		4.00000000	8.58500000	76.54925052	0.104636
5	-0.26001999	8.93203830	-2.32250851		5.00000000	6.86800000	61.34523904	0.125979
6	-0.24984264	8.93023400	-2.23115324		6.00000000	5.72333333	51.11070593	0.147359
7	-0.24003892	8.92400260	-2.14210795		7.00000000	4.90571429	43.77860704	0.168854
8	-0.22991663	8.91361710	-2.04938880		8.00000000	4.29250000	38.26170140	0.190230
9	-0.22004816	8.92484190	-1.96389504		9.00000000	3.81555556	34.05323009	0.211602
10	-0.20990950	8.92552950	-1.87355343		10.00000000	3.43400000	30.65026830	0.232984
11	-0.20005144	8.93076990	-1.78661338		11.00000000	3.12181818	27.88023985	0.254475
12	-0.18991427	8.92278770	-1.69456471		12.00000000	2.86166667	25.53404413	0.275871
13	-0.18013957	8.91160300	-1.60533233		13.00000000	2.64153846	23.54034208	0.297222
14	-0.16999795	8.94465350	-1.52057276		14.00000000	2.45285714	21.93995723	0.318592
15	-0.16016892	8.90677930	-1.42658922		15.00000000	2.28933333	20.39058674	0.340093
16	-0.15003175	8.92127230	-1.33847410		16.00000000	2.14625000	19.14728067	0.361459
17	-0.13988192	8.93175600	-1.24939118		17.00000000	2.02000000	18.04214712	0.382835
18	-0.13005736	8.91813950	-1.15986968		18.00000000	1.90777778	17.01382836	0.404193
19	-0.11989042	8.91556260	-1.06889054		19.00000000	1.80736842	16.11370630	0.425676
20	-0.11007851	8.93299960	-0.98333129		20.00000000	1.71700000	15.33796031	0.447065
21	-0.09991455	8.92619710	-0.89185698		21.00000000	1.63523810	14.59645754	0.468451
22	-0.09011827	8.91388420	-0.80330380		22.00000000	1.56090909	13.91376288	0.489796
23	-0.07996398	8.93196490	-0.71423548		23.00000000	1.49304348	13.33581194	0.511284
24	-0.07016324	8.92314820	-0.62607694		24.00000000	1.43083333	12.76753788	0.532673
25	-0.06001267	8.92428110	-0.53556995		25.00000000	1.37360000	12.25839252	0.554065
26	-0.04987923	8.92252730	-0.44504876		26.00000000	1.32076923	11.78459952	0.575552
27	-0.04006359	8.91756060	-0.35726949		27.00000000	1.27185185	11.34181596	0.596926
28	-0.02992494	8.92668440	-0.26713047		28.00000000	1.22642857	10.94794080	0.618272
29	-0.02008846	8.91571620	-0.17910303		29.00000000	1.18413793	10.55743773	0.639654
30	-0.00996097	8.91436960	-0.08879578		30.00000000	1.14466667	10.20398174	0.661141
31	-0.00068345	8.91679100	-0.00609422		31.00000000	1.10774194	9.87750332	0.682645
32	0.00946169	8.91547300	0.08435546		32.00000000	1.07312500	9.56741696	0.704016
33	0.01928672	8.92663100	0.17216545		33.00000000	1.04060606	9.28910632	0.725394
34	0.02941467	8.91468520	0.26222251		34.00000000	1.01000000	9.00383205	0.746879
35	0.03925980	8.91890720	0.35015447		35.00000000	0.98114286	8.75072209	0.768250
36	0.04942123	8.91756530	0.44071706		36.00000000	0.95388889	8.50636646	0.789605
37	0.05923956	8.93051150	0.52903960		37.00000000	0.92810811	8.28848013	0.810989
38	0.06934220	8.91597840	0.61825358		38.00000000	0.90368421	8.05722890	0.832479
39	0.07951778	8.92569830	0.70975173		39.00000000	0.88051282	7.85919179	0.853861
40	0.08933538	8.92045590	0.79691227		40.00000000	0.85850000	7.65821139	0.875223
41	0.09946778	8.92943950	0.88819156		41.00000000	0.83756098	7.47895006	0.896603
42	0.10931514	8.91702180	0.97476549		42.00000000	0.81761905	7.29072687	0.918085
43	0.11948179	8.93513870	1.06758637		43.00000000	0.79860465	7.13564332	0.939475
44	0.12929194	8.91308310	1.15238981		44.00000000	0.78045455	6.95625622	0.960826
45	0.13943700	8.92006870	1.24378762		45.00000000	0.76311111	6.80700354	0.982200
46	0.14927097	8.91871740	1.33130560		46.00000000	0.74652174	6.65801642	1.003683
47	0.15940039	8.91602710	1.42121820		47.00000000	0.73063830	6.51439086	1.025061
48	0.16953877	8.91592310	1.51159464		48.00000000	0.71541667	6.37859998	1.046454
49	0.17935859	8.91935440	1.59976283		49.00000000	0.70081633	6.25082919	1.067819
50	0.18952970	8.91217710	1.68912225		50.00000000	0.68680000	6.12088323	1.089300
51	0.19932346	8.92460630	1.77888341		51.00000000	0.67333333	6.00923491	1.110680
52	0.20946406	8.92065330	1.86855626		52.00000000	0.66038462	5.89106220	1.132063
53	0.21928909	8.92147060	1.95638117		53.00000000	0.64792453	5.78043963	1.153416
54	0.22944011	8.91648770	2.04579992		54.00000000	0.63592593	5.67022570	1.174892
55	0.23926440	8.91778760	2.13370910		55.00000000	0.62436364	5.56794229	1.196275
56	0.24940947	8.93141940	2.22758058		56.00000000	0.61321429	5.47687397	1.217659
57	0.25956124	8.91455170	2.31387209		57.00000000	0.60245614	5.37062641	1.239141
58	0.26933268	8.91875080	2.40211106		58.00000000	0.59206897	5.28051556	1.260533
59	0.27952388	8.91551110	2.49209825		59.00000000	0.58203390	5.18912968	1.281882
60	0.28934592	8.91601180	2.57981164		60.00000000	0.57233333	5.10293075	1.303272
61	0.29946420	8.91189480	2.66879345		61.00000000	0.56295082	5.01695848	1.324768
62	0.30927658	8.91486550	2.75715911		62.00000000	0.55387097	4.93768518	1.346162
63	0.31943950	8.92539790	2.85112464		63.00000000	0.54507937	4.86505022	1.367519
64	0.32923180	8.89664940	2.92905990		64.00000000	0.53656250	4.77360844	1.388890
65	0.33940884	8.93514250	3.03266635		65.00000000	0.52830769	4.72050451	1.410371
66	0.34921676	8.91504190	3.11328205		66.00000000	0.52030303	4.63852332	1.431742
67	0.35935217	8.91807460	3.20472946		67.00000000	0.51253731	4.57084600	1.453091
68	0.36951360	8.90758900	3.29147528		68.00000000	0.50500000	4.49833245	1.474472
69	0.37936392	8.91467860	3.38190742		69.00000000	0.49768116	4.43666758	1.495957
70	0.38951942	8.91144940	3.47118260		70.00000000	0.49057143	4.37170246	1.517332
71	0.39929384	8.91786100	3.56084696		71.00000000	0.48366197	4.31323024	1.538702
72	0.40946868	8.91133590	3.64891295		72.00000000	0.47694444	4.25021215	1.560076
73	0.41928923	8.91163640	3.73655316		73.00000000	0.47041096	4.19213142	1.581552
74	0.42944992	8.90474890	3.82414370		74.00000000	0.46405405	4.13228483	1.602941
75	0.43924892	8.90215020	3.91025986		75.00000000	0.45786667	4.07599784	1.624284
76	0.44943267	8.90407940	4.00178418		76.00000000	0.45184211	4.02323798	1.645664
77	0.45953235	8.89916420	4.08945384		77.00000000	0.44597403	3.96879609	1.667148
78	0.46941468	8.88663960	4.17151908		78.00000000	0.44025641	3.91240005	1.688521
79	0.47955528	8.88298800	4.25988380		79.00000000	0.43468354	3.86128871	1.709902
80	0.48938552	8.86659810	4.33918472		80.00000000	0.42925000	3.80598723	1.731264
81	0.49952090	8.85660460	4.42405910		81.00000000	0.42395062	3.75476299	1.752743
82	0.50935560	8.82090190	4.49297578		82.00000000	0.41878049	3.69402160	1.774135
83	0.51944560	8.79084590	4.56636622		83.00000000	0.41373494	3.63708010	1.795515
84	0.52923638	8.73632620	4.62358165		84.00000000	0.40880952	3.57149335	1.816859
85	0.53938520	8.66453080	4.67351968		85.00000000	0.40400000	3.50047044	1.838331
86	0.54954439	8.54868510	4.69788194		86.00000000	0.39930233	3.41350984	1.859713
87	0.55936795	8.40230750	4.69998152		87.00000000	0.39471264	3.31649701	1.881101
88	0.56945121	8.19132710	4.66456113		88.00000000	0.39022727	3.19647923	1.902596
89	0.57925540	7.91227390	4.58322738		89.00000000	0.38584270	3.05289310	1.923988
90	0.58939826	7.50630430	4.42420269		90.00000000	0.38155556	2.86407211	1.945355
91	0.59918529	7.01642470	4.20413847		91.00000000	0.37736264	2.64773653	1.966738
92	0.60927755	6.32334850	3.85267428		92.00000000	0.37326087	2.36025856	1.988290
93	0.61909664	5.50404980	3.40753874		93.00000000	0.36924731	2.03235559	2.009736
94	0.62922752	4.43614290	2.79134320		94.00000000	0.36531915	1.62060795	2.031097
95	0.63929743	3.14101720	2.00804422		95.00000000	0.36147368	1.13539506	2.052535
96	0.64912468	1.62363340	1.05394051		96.00000000	0.35770833	0.58078720	2.074047
97	0.65916628	-0.22349587	-0.14732094		97.00000000	0.35402062	-0.07912215	2.095429
98	0.66894293	-2.33332200	-1.56085926		98.00000000	0.35040816	-0.81761508	2.116776
99	0.67898977	-4.85778330	-3.29838517		99.00000000	0.34686869	-1.68501291	2.138180
100	0.68887210	-7.71339750	-5.31354433		100.00000000	0.34340000	-2.64878070	2.159659
101	0.69582951	-9.99597450	-6.95549404		101.00000000	0.34000000	-3.39863133	2.181034
13:47 02/04/2018
Test Lot:	JK-PERC
Recipe:	Recipe_YJX-LID
Cell Name:	1-10-50min
Test Order:	3
Test Condition:	Light
1	-0.29994717	8.91382880	-2.67367772		1.00000000	34.34000000	306.10088099	0.000000
2	-0.29009211	8.93298240	-2.59138771		2.00000000	17.17000000	153.37930781	0.021490
3	-0.27996686	8.91550450	-2.49604580		3.00000000	11.44666667	102.05280818	0.042853
4	-0.27016610	8.91899390	-2.40960980		4.00000000	8.58500000	76.56956263	0.064251
5	-0.26000065	8.92701150	-2.32102879		5.00000000	6.86800000	61.31071498	0.085756
6	-0.24982552	8.91359520	-2.22684356		6.00000000	5.72333333	51.01547653	0.107136
7	-0.24000393	8.93427750	-2.14426171		7.00000000	4.90571429	43.82901276	0.128493
8	-0.22985189	8.92658620	-2.05179271		8.00000000	4.29250000	38.31737126	0.149861
9	-0.22006230	8.91554930	-1.96197628		9.00000000	3.81555556	34.01777366	0.171329
10	-0.20989685	8.91303830	-1.87081866		10.00000000	3.43400000	30.60737352	0.192757
11	-0.20009312	8.92914580	-1.78666064		11.00000000	3.12181818	27.87516971	0.214116
12	-0.18994553	8.91207310	-1.69280845		12.00000000	2.86166667	25.50338252	0.235506
13	-0.18015893	8.91952130	-1.60693141		13.00000000	2.64153846	23.56125857	0.256991
14	-0.16998380	8.91697500	-1.51574130		14.00000000	2.45285714	21.87206582	0.278361
15	-0.16016966	8.91415120	-1.42777657		15.00000000	2.28933333	20.40746348	0.299719
16	-0.15003249	8.91163920	-1.33703542		16.00000000	2.14625000	19.12660563	0.321087
17	-0.13987151	8.93107030	-1.24920229		17.00000000	2.02000000	18.04076201	0.342565
18	-0.13005513	8.90342520	-1.15793612		18.00000000	1.90777778	16.98575674	0.363949
19	-0.11990754	8.92679310	-1.07038980		19.00000000	1.80736842	16.13400395	0.385296
20	-0.11012243	8.92398740	-0.98273118		20.00000000	1.71700000	15.32248637	0.406663
21	-0.09995251	8.91741850	-0.89131837		21.00000000	1.63523810	14.58210244	0.428150
22	-0.09012571	8.91544910	-0.80351118		22.00000000	1.56090909	13.91620555	0.449532
23	-0.07996845	8.92377850	-0.71362075		23.00000000	1.49304348	13.32358929	0.470885
24	-0.07018333	8.91928100	-0.62598483		24.00000000	1.43083333	12.76200456	0.492263
25	-0.06002681	8.92004590	-0.53544193		25.00000000	1.37360000	12.25257505	0.513741
26	-0.04986434	8.92545600	-0.44506198		26.00000000	1.32076923	11.78846766	0.535127
27	-0.04006806	8.92069630	-0.35743496		27.00000000	1.27185185	11.34580411	0.556518
28	-0.02992494	8.92390250	-0.26704722		28.00000000	1.22642857	10.94452899	0.577859
29	-0.02008325	8.92532730	-0.17924960		29.00000000	1.18413793	10.56881860	0.599329
30	-0.00999595	8.92125700	-0.08917646		30.00000000	1.14466667	10.21186551	0.620701
31	-0.00067899	8.91788580	-0.00605514		31.00000000	1.10774194	9.87871608	0.642188
32	0.00946020	8.92054460	0.08439017		32.00000000	1.07312500	9.57285942	0.663613
33	0.01929342	8.91133590	0.17193015		33.00000000	1.04060606	9.27319015	0.685076
34	0.02941765	8.92725180	0.26261872		34.00000000	1.01000000	9.01652432	0.706444
35	0.03927096	8.91692640	0.35017626		35.00000000	0.98114286	8.74877865	0.727852
36	0.04941900	8.90216830	0.43993626		36.00000000	0.95388889	8.49167943	0.749208
37	0.05923808	8.93560980	0.52932833		37.00000000	0.92810811	8.29321191	0.770693
38	0.06936900	8.90433790	0.61768498		38.00000000	0.90368421	8.04670957	0.792077
39	0.07950364	8.92739680	0.70976055		39.00000000	0.88051282	7.86068734	0.813442
40	0.08935770	8.91188340	0.79634537		40.00000000	0.85850000	7.65085190	0.834808
41	0.09950648	8.91330810	0.88693193		41.00000000	0.83756098	7.46543903	0.856295
42	0.10930026	8.91776940	0.97471451		42.00000000	0.81761905	7.29133812	0.877670
43	0.11947658	8.90547750	1.06399599		43.00000000	0.79860465	7.11195575	0.899060
44	0.12930608	8.93747520	1.15566988		44.00000000	0.78045455	6.97529314	0.920407
45	0.13946676	8.90221020	1.24156241		45.00000000	0.76311111	6.79337552	0.941888
46	0.14928213	8.93761540	1.33422626		46.00000000	0.74652174	6.67212419	0.963270
47	0.15938625	8.90258880	1.41895024		47.00000000	0.73063830	6.50457233	0.984660
48	0.16955216	8.91101840	1.51088242		48.00000000	0.71541667	6.37509108	1.006124
49	0.17938091	8.91494850	1.59917157		49.00000000	0.70081633	6.24774146	1.027502
50	0.18949248	8.91754250	1.68980724		50.00000000	0.68680000	6.12456819	1.048839
51	0.19929816	8.91741560	1.77722452		51.00000000	0.67333333	6.00439317	1.070209
52	0.20944546	8.92036910	1.86833081		52.00000000	0.66038462	5.89087452	1.091689
53	0.21925040	8.92227170	1.95621164		53.00000000	0.64792453	5.78095868	1.113069
54	0.22940886	8.91249560	2.04460546		54.00000000	0.63592593	5.66768702	1.134423
55	0.23923686	8.91948320	2.13386915		55.00000000	0.62436364	5.56900097	1.155804
56	0.24938193	8.91040800	2.22209474		56.00000000	0.61321429	5.46398948	1.177286
57	0.25952625	8.92252920	2.31563054		57.00000000	0.60245614	5.37543250	1.198689
58	0.26934978	8.91788960	2.40203160		58.00000000	0.59206897	5.28000567	1.220035
59	0.27949932	8.92087360	2.49337811		59.00000000	0.58203390	5.19225084	1.241414
60	0.28931689	8.91754250	2.57999566		60.00000000	0.57233333	5.10380682	1.262889
61	0.29945898	8.91172790	2.66869695		61.00000000	0.56295082	5.01686453	1.284277
62	0.30928403	8.91613200	2.75761724		62.00000000	0.55387097	4.93838666	1.305622
63	0.31942388	8.91789250	2.84858782		63.00000000	0.54507937	4.86095918	1.327000
64	0.32924742	8.91646390	2.93572273		64.00000000	0.53656250	4.78424016	1.348476
65	0.33940589	8.92054650	3.02768602		65.00000000	0.52830769	4.71279334	1.369865
66	0.34919965	8.91244700	3.11222337		66.00000000	0.52030303	4.63717318	1.391225
67	0.35935438	8.90153600	3.19880595		67.00000000	0.51253731	4.56236935	1.412604
68	0.36952698	8.91812130	3.29548643		68.00000000	0.50500000	4.50365126	1.434085
69	0.37932450	8.92044930	3.38374497		69.00000000	0.49768116	4.43953955	1.455470
70	0.38950676	8.90289590	3.46773814		70.00000000	0.49057143	4.36750636	1.476847
71	0.39934146	8.92034240	3.56226256		71.00000000	0.48366197	4.31443039	1.498219
72	0.40947610	8.90855220	3.64783921		72.00000000	0.47694444	4.24888448	1.519702
73	0.41928476	8.91293620	3.73705832		73.00000000	0.47041096	4.19274286	1.541066
74	0.42941943	8.91063500	3.82639980		74.00000000	0.46405405	4.13501630	1.562458
75	0.43927422	8.91118050	3.91445186		75.00000000	0.45786667	4.08013251	1.583798
76	0.44942895	8.89626600	3.99823949		76.00000000	0.45184211	4.01970756	1.605268
77	0.45951819	8.90260890	4.09091073		77.00000000	0.44597403	3.97033233	1.626655
78	0.46941468	8.90370080	4.17952786		78.00000000	0.44025641	3.91991135	1.648034
79	0.47954708	8.87973020	4.25824869		79.00000000	0.43468354	3.85987260	1.669511
80	0.48935872	8.87333490	4.34224381		80.00000000	0.42925000	3.80887901	1.690898
81	0.49953133	8.85339360	4.42254748		81.00000000	0.42395062	3.75340168	1.712238
82	0.50932735	8.82462690	4.49462383		82.00000000	0.41878049	3.69558156	1.733620
83	0.51946348	8.80412960	4.57342380		83.00000000	0.41373494	3.64257603	1.755099
84	0.52922523	8.73337550	4.62192266		84.00000000	0.40880952	3.57028708	1.776476
85	0.53934872	8.67083260	4.67660246		85.00000000	0.40400000	3.50301637	1.797835
86	0.54948187	8.55198960	4.69916324		86.00000000	0.39930233	3.41482934	1.819208
87	0.55931360	8.39807510	4.69715762		87.00000000	0.39471264	3.31482642	1.840696
88	0.56941998	8.21300410	4.67664863		88.00000000	0.39022727	3.20493819	1.862078
89	0.57922268	7.93146750	4.59408586		89.00000000	0.38584270	3.06029881	1.883428
90	0.58939081	7.52820160	4.43705284		90.00000000	0.38155556	2.87242714	1.904795
91	0.59916747	7.02915760	4.21164258		91.00000000	0.37736264	2.65254145	1.926283
92	0.60930508	6.34146020	3.86388391		92.00000000	0.37326087	2.36701895	1.947667
93	0.61910331	5.52324300	3.41945802		93.00000000	0.36924731	2.03944263	1.969007
94	0.62921190	4.46527910	2.80960675		94.00000000	0.36531915	1.63125196	1.990494
95	0.63928849	3.14305570	2.00931933		95.00000000	0.36147368	1.13613192	2.012004
96	0.64908969	1.62334180	1.05369443		96.00000000	0.35770833	0.58068289	2.033398
97	0.65912461	-0.23668270	-0.15600339		97.00000000	0.35402062	-0.08379056	2.054743
98	0.66892362	-2.35955100	-1.57835940		98.00000000	0.35040816	-0.82680593	2.076117
99	0.67899722	-4.92430500	-3.34358941		99.00000000	0.34686869	-1.70808721	2.097594
100	0.68890488	-7.83108000	-5.39486923		100.00000000	0.34340000	-2.68919287	2.118983
101	0.69535989	-9.99660020	-6.95123482		101.00000000	0.34000000	-3.39884407	2.140348
13:48 02/04/2018
Test Lot:	JK-PERC
Recipe:	Recipe_YJX-LID
Cell Name:	1-10-50min
Test Order:	4
Test Condition:	Light
1	-0.29993394	8.92728810	-2.67759669		1.00000000	34.34000000	306.56307335	0.000000
2	-0.29013675	8.91810420	-2.58746977		2.00000000	17.17000000	153.12384911	0.061792
3	-0.27998897	8.92410180	-2.49865007		3.00000000	11.44666667	102.15121860	0.083214
4	-0.27019924	8.91823100	-2.40969924		4.00000000	8.58500000	76.56301314	0.104724
5	-0.26003954	8.92156510	-2.31995968		5.00000000	6.86800000	61.27330911	0.126168
6	-0.24985605	8.92777820	-2.23065940		6.00000000	5.72333333	51.09665056	0.147593
7	-0.24005291	8.91830250	-2.14086447		7.00000000	4.90571429	43.75064398	0.168990
8	-0.22990736	8.92392830	-2.05167680		8.00000000	4.29250000	38.30596223	0.190475
9	-0.22005807	8.91893200	-1.96268296		9.00000000	3.81555556	34.03068054	0.211864
10	-0.20993412	8.91655350	-1.87188881		10.00000000	3.43400000	30.61944472	0.233210
11	-0.20010342	8.92126460	-1.78517556		11.00000000	3.12181818	27.85056603	0.254579
12	-0.18997873	8.92692090	-1.69592510		12.00000000	2.86166667	25.54587198	0.276051
13	-0.18018599	8.91048050	-1.60554375		13.00000000	2.64153846	23.53737695	0.297440
14	-0.17002408	8.91206930	-1.51526638		14.00000000	2.45285714	21.86003284	0.318824
15	-0.16021498	8.91755290	-1.42872556		15.00000000	2.28933333	20.41525111	0.340180
16	-0.15005603	8.91546920	-1.33781991		16.00000000	2.14625000	19.13482577	0.361650
17	-0.13988744	8.93326570	-1.24965167		17.00000000	2.02000000	18.04519671	0.383029
18	-0.13008875	8.91163730	-1.15930376		18.00000000	1.90777778	17.00142360	0.404418
19	-0.11992981	8.91478630	-1.06914863		19.00000000	1.80736842	16.11230324	0.425808
20	-0.11008348	8.92235660	-0.98220406		20.00000000	1.71700000	15.31968628	0.447281
21	-0.09993275	8.91348650	-0.89074917		21.00000000	1.63523810	14.57567269	0.468657
22	-0.09013926	8.93205550	-0.80512889		22.00000000	1.56090909	13.94212663	0.490040
23	-0.07995800	8.92119790	-0.71332113		23.00000000	1.49304348	13.31973634	0.511525
24	-0.07014071	8.91317940	-0.62517669		24.00000000	1.43083333	12.75327419	0.532912
25	-0.05999145	8.92789840	-0.53559756		25.00000000	1.37360000	12.26336124	0.554245
26	-0.04985261	8.92738630	-0.44505353		26.00000000	1.32076923	11.79101714	0.575621
27	-0.04003532	8.91403200	-0.35687608		27.00000000	1.27185185	11.33732811	0.597105
28	-0.02991211	8.91877840	-0.26677948		28.00000000	1.22642857	10.93824465	0.618486
29	-0.02005239	8.91888520	-0.17884495		29.00000000	1.18413793	10.56119027	0.639842
30	-0.00992918	8.92282870	-0.08859640		30.00000000	1.14466667	10.21366459	0.661221
31	-0.00064406	8.92095470	-0.00574561		31.00000000	1.10774194	9.88211563	0.682819
32	0.00947894	8.91791340	0.08453236		32.00000000	1.07312500	9.57003582	0.704209
33	0.01928554	8.92165850	0.17205898		33.00000000	1.04060606	9.28393191	0.725561
34	0.02945088	8.91249850	0.26248091		34.00000000	1.01000000	9.00162349	0.746934
35	0.03928427	8.91930200	0.35038827		35.00000000	0.98114286	8.75110945	0.768414
36	0.04940495	8.91374490	0.44038315		36.00000000	0.95388889	8.50272222	0.789796
37	0.05921900	8.91051100	0.52767151		37.00000000	0.92810811	8.26991751	0.811158
38	0.06937094	8.92658710	0.61924574		38.00000000	0.90368421	8.06681582	0.832532
39	0.07951470	8.92646980	0.70978554		39.00000000	0.88051282	7.85987110	0.854011
40	0.08934288	8.91705230	0.79667511		40.00000000	0.85850000	7.65528940	0.875404
41	0.09948663	8.91006180	0.88643206		41.00000000	0.83756098	7.46272005	0.896747
42	0.10931779	8.92293830	0.97543590		42.00000000	0.81761905	7.29556431	0.918128
43	0.11944964	8.91541580	1.06494321		43.00000000	0.79860465	7.11989252	0.939593
44	0.12925921	8.91686920	1.15258747		44.00000000	0.78045455	6.95921110	0.960958
45	0.13943200	8.91329100	1.24279799		45.00000000	0.76311111	6.80183140	0.982353
46	0.14924380	8.91958240	1.33119237		46.00000000	0.74652174	6.65866217	1.003716
47	0.15938310	8.90799900	1.41978450		47.00000000	0.73063830	6.50852523	1.025194
48	0.16953430	8.91675570	1.51169594		48.00000000	0.71541667	6.37919564	1.046574
49	0.17937140	8.91467290	1.59903736		49.00000000	0.70081633	6.24754831	1.067969
50	0.18951516	8.93007660	1.69238490		50.00000000	0.68680000	6.13317661	1.089310
51	0.19930166	8.90892030	1.77556260		51.00000000	0.67333333	5.99867300	1.110781
52	0.20945138	8.92315200	1.86896650		52.00000000	0.66038462	5.89271230	1.132163
53	0.21925128	8.92254350	1.95627908		53.00000000	0.64792453	5.78113479	1.153538
54	0.22942257	8.90573790	2.04317728		54.00000000	0.63592593	5.66338962	1.175037
55	0.23926118	8.92061900	2.13435783		55.00000000	0.62436364	5.56971012	1.196410
56	0.24940939	8.92593290	2.22621148		56.00000000	0.61321429	5.47350957	1.217751
57	0.25953677	8.92063430	2.31523261		57.00000000	0.60245614	5.37429091	1.239143
58	0.26937464	8.91465090	2.40138088		58.00000000	0.59206897	5.27808814	1.260618
59	0.27951467	8.92269520	2.49402420		59.00000000	0.58203390	5.19331107	1.282008
60	0.28934658	8.91609000	2.57984015		60.00000000	0.57233333	5.10297551	1.303372
61	0.29943749	8.91730120	2.67017429		61.00000000	0.56295082	5.02000202	1.324751
62	0.30930141	8.91327100	2.75688729		62.00000000	0.55387097	4.93680203	1.346240
63	0.31945780	8.91708560	2.84863255		63.00000000	0.54507937	4.86051936	1.367630
64	0.32927483	8.90747360	2.93300686		64.00000000	0.53656250	4.77941630	1.388980
65	0.33942527	8.92888160	3.03068805		65.00000000	0.52830769	4.71719683	1.410394
66	0.34921178	8.90993310	3.11145360		66.00000000	0.52030303	4.63586519	1.431899
67	0.35937488	8.90528580	3.20033602		67.00000000	0.51253731	4.56429126	1.453271
68	0.36954618	8.92204090	3.29710613		68.00000000	0.50500000	4.50563065	1.474627
69	0.37935576	8.91137500	3.38058144		69.00000000	0.49768116	4.43502344	1.496007
70	0.38948163	8.92064570	3.47442763		70.00000000	0.49057143	4.37621390	1.517486
71	0.39932248	8.90012360	3.55401943		71.00000000	0.48366197	4.30465133	1.538874
72	0.40949303	8.91765500	3.65171757		72.00000000	0.47694444	4.25322601	1.560226
73	0.41928327	8.91551880	3.73812788		73.00000000	0.47041096	4.19395775	1.581593
74	0.42942107	8.90610310	3.82446832		74.00000000	0.46405405	4.13291325	1.603071
75	0.43925297	8.90216160	3.91030092		75.00000000	0.45786667	4.07600306	1.624450
76	0.44941235	8.90901570	4.00382168		76.00000000	0.45184211	4.02546841	1.645810
77	0.45953080	8.89001850	4.08523731		77.00000000	0.44597403	3.96471734	1.667186
78	0.46939546	8.89953990	4.17740363		78.00000000	0.44025641	3.91807949	1.688660
79	0.47954369	8.89447310	4.26528845		79.00000000	0.43468354	3.86628109	1.710051
80	0.48935249	8.87468530	4.34284935		80.00000000	0.42925000	3.80945867	1.731441
81	0.49951413	8.85436340	4.42287963		81.00000000	0.42395062	3.75381283	1.752777
82	0.50931698	8.82821270	4.49635863		82.00000000	0.41878049	3.69708322	1.774250
83	0.51942205	8.79439830	4.56800439		83.00000000	0.41373494	3.63854985	1.795636
84	0.52924055	8.73043920	4.62050244		84.00000000	0.40880952	3.56908669	1.817020
85	0.53939104	8.67197040	4.67758313		85.00000000	0.40400000	3.50347604	1.838513
86	0.54951614	8.54877190	4.69768814		86.00000000	0.39930233	3.41354450	1.859888
87	0.55935848	8.41753770	4.70842109		87.00000000	0.39471264	3.32250856	1.881235
88	0.56948435	8.20442300	4.67229050		88.00000000	0.39022727	3.20158961	1.902621
89	0.57929021	7.92035960	4.58818678		89.00000000	0.38584270	3.05601291	1.924106
90	0.58940196	7.51840350	4.43136176		90.00000000	0.38155556	2.86868862	1.945478
91	0.59918773	7.02902320	4.21170446		91.00000000	0.37736264	2.65249073	1.966837
92	0.60933673	6.32953310	3.85681700		92.00000000	0.37326087	2.36256703	1.988312
93	0.61911428	5.51810500	3.41633760		93.00000000	0.36924731	2.03754544	2.009814
94	0.62923127	4.43806460	2.79256902		94.00000000	0.36531915	1.62130998	2.031188
95	0.63933778	3.14057870	2.00789061		95.00000000	0.36147368	1.13523655	2.052533
96	0.64914215	1.61674020	1.04949421		96.00000000	0.35770833	0.57832144	2.073910
97	0.65916085	-0.25236461	-0.16634887		97.00000000	0.35402062	-0.08934228	2.095390
98	0.66893995	-2.35273960	-1.57384151		98.00000000	0.35040816	-0.82441916	2.116824
99	0.67902786	-4.90905900	-3.33338783		99.00000000	0.34686869	-1.70279885	2.138191
100	0.68889177	-7.80926040	-5.37973522		100.00000000	0.34340000	-2.68170002	2.159575
101	0.69549948	-9.99661540	-6.95264081		101.00000000	0.34000000	-3.39884924	2.181060
