# Supplementary material for: Study on the Electrical Injection Regeneration of Industrialized B-Doped Czochralski Silicon PERC Solar Cells
Source: Hindawi journal article supplement (doi:10.1155/2019/5357370), 2019-06-20
Supplement: f1 [file 5357370.f1.zip › section3.2/IVRawData_1-10-60min.csv]

14:17 02/04/2018
Test Lot:	JK-PERC
Recipe:	Recipe_YJX-LID
Cell Name:	1-10-60min
Test Order:	2
Test Condition:	Light
1	-0.29991987	8.94141860	-2.68170910		1.00000000	34.34000000	307.04831472	0.000000
2	-0.29011244	8.92912860	-2.59045129		2.00000000	17.17000000	153.31313806	0.061718
3	-0.27997676	8.93815610	-2.50247599		3.00000000	11.44666667	102.31209349	0.083099
4	-0.27015144	8.93418880	-2.41358397		4.00000000	8.58500000	76.70001085	0.104610
5	-0.26000160	8.93325810	-2.32266140		5.00000000	6.86800000	61.35361663	0.125995
6	-0.24984507	8.92910190	-2.23089209		6.00000000	5.72333333	51.10422654	0.147388
7	-0.24005994	8.92209150	-2.14183675		7.00000000	4.90571429	43.76923173	0.168743
8	-0.22991459	8.92344470	-2.05163013		8.00000000	4.29250000	38.30388637	0.190225
9	-0.22004089	8.93453600	-1.96596325		9.00000000	3.81555556	34.09021847	0.211656
10	-0.20991115	8.91844460	-1.87208096		10.00000000	3.43400000	30.62593876	0.233043
11	-0.20012380	8.94008350	-1.78912348		11.00000000	3.12181818	27.90931522	0.254489
12	-0.18995388	8.92857170	-1.69601684		12.00000000	2.86166667	25.55059601	0.275959
13	-0.18016726	8.92706490	-1.60836482		13.00000000	2.64153846	23.58118528	0.297338
14	-0.17002191	8.92273900	-1.51706113		14.00000000	2.45285714	21.88620409	0.318769
15	-0.16021816	8.93725970	-1.43191130		15.00000000	2.28933333	20.46036654	0.340115
16	-0.15004377	8.91375540	-1.33745347		16.00000000	2.14625000	19.13114753	0.361599
17	-0.13991405	8.93943600	-1.25075270		17.00000000	2.02000000	18.05766072	0.382993
18	-0.13009989	8.91673090	-1.16006571		18.00000000	1.90777778	17.01114106	0.404351
19	-0.11994857	8.92972660	-1.07110794		19.00000000	1.80736842	16.13930587	0.425713
20	-0.11015750	8.92293740	-0.98292848		20.00000000	1.71700000	15.32068352	0.447211
21	-0.09997269	8.92587280	-0.89234350		21.00000000	1.63523810	14.59592724	0.468583
22	-0.09016002	8.93490790	-0.80557147		22.00000000	1.56090909	13.94657897	0.489966
23	-0.07999382	8.93453310	-0.71470745		23.00000000	1.49304348	13.33964638	0.511328
24	-0.07015957	8.92713830	-0.62632418		24.00000000	1.43083333	12.77324705	0.532807
25	-0.06003431	8.92860510	-0.53602260		25.00000000	1.37360000	12.26433197	0.554185
26	-0.04989043	8.93505670	-0.44577385		26.00000000	1.32076923	11.80114796	0.575572
27	-0.04004725	8.92351150	-0.35736210		27.00000000	1.27185185	11.34938463	0.597055
28	-0.02992347	8.93120190	-0.26725258		28.00000000	1.22642857	10.95348119	0.618425
29	-0.02010858	8.92323780	-0.17943360		29.00000000	1.18413793	10.56634435	0.639783
30	-0.00995354	8.93248840	-0.08890986		30.00000000	1.14466667	10.22472172	0.661160
31	-0.00069834	8.92326260	-0.00623149		31.00000000	1.10774194	9.88467218	0.682746
32	0.00947509	8.91379740	0.08445907		32.00000000	1.07312500	9.56561883	0.704127
33	0.01933065	8.92433450	0.17251316		33.00000000	1.04060606	9.28671657	0.725467
34	0.02944818	8.93034740	0.26298249		34.00000000	1.01000000	9.01965087	0.746842
35	0.03927545	8.93016720	0.35073635		35.00000000	0.98114286	8.76176976	0.768319
36	0.04941755	8.93724820	0.44165689		36.00000000	0.95388889	8.52514176	0.789696
37	0.05921058	8.92170910	0.52825961		37.00000000	0.92810811	8.28031055	0.811060
38	0.06938393	8.93332100	0.61982895		38.00000000	0.90368421	8.07290114	0.832429
39	0.07953645	8.92438130	0.70981363		39.00000000	0.88051282	7.85803215	0.853901
40	0.08933098	8.93087960	0.79780422		40.00000000	0.85850000	7.66716014	0.875285
41	0.09947977	8.91706470	0.88706756		41.00000000	0.83756098	7.46858541	0.896637
42	0.10929886	8.93327430	0.97639670		42.00000000	0.81761905	7.30401523	0.918053
43	0.11948412	8.92514900	1.06641357		43.00000000	0.79860465	7.12766550	0.939543
44	0.12926599	8.92965980	1.15430131		44.00000000	0.78045455	6.96919358	0.960932
45	0.13944678	8.92589660	1.24468754		45.00000000	0.76311111	6.81145087	0.982287
46	0.14923312	8.92791940	1.33234127		46.00000000	0.74652174	6.66488592	1.003715
47	0.15941986	8.92991830	1.42360633		47.00000000	0.73063830	6.52454031	1.025217
48	0.16955379	8.93242840	1.51452709		48.00000000	0.71541667	6.39040815	1.046610
49	0.17936543	8.91278270	1.59864510		49.00000000	0.70081633	6.24622363	1.068005
50	0.18950975	8.94011210	1.69423841		50.00000000	0.68680000	6.14006899	1.089374
51	0.19927971	8.91742520	1.77706191		51.00000000	0.67333333	6.00439963	1.110850
52	0.20943521	8.92091180	1.86835304		52.00000000	0.66038462	5.89123291	1.132223
53	0.21925950	8.93243030	1.95852020		53.00000000	0.64792453	5.78754069	1.153588
54	0.22940755	8.92074780	2.04648690		54.00000000	0.63592593	5.67293480	1.174958
55	0.23922662	8.93219660	2.13681920		55.00000000	0.62436364	5.57693875	1.196443
56	0.24939030	8.92658230	2.22620304		56.00000000	0.61321429	5.47390779	1.217826
57	0.25951678	8.91771890	2.31429769		57.00000000	0.60245614	5.37253451	1.239228
58	0.26932469	8.92610650	2.40402087		58.00000000	0.59206897	5.28487064	1.260712
59	0.27948466	8.93304920	2.49665022		59.00000000	0.58203390	5.19933745	1.282104
60	0.28932682	8.93130870	2.58406714		60.00000000	0.57233333	5.11168568	1.303455
61	0.29945996	8.91867830	2.67078705		61.00000000	0.56295082	5.02077726	1.324827
62	0.30928054	8.91231820	2.75640659		62.00000000	0.55387097	4.93627431	1.346310
63	0.31943679	8.91773220	2.84865175		63.00000000	0.54507937	4.86087181	1.367685
64	0.32924098	8.92583270	2.93874991		64.00000000	0.53656250	4.78926711	1.389031
65	0.33942103	8.91834450	3.02707368		65.00000000	0.52830769	4.71163000	1.410413
66	0.34924904	8.92981340	3.11872876		66.00000000	0.52030303	4.64620897	1.431898
67	0.35938221	8.92606350	3.20786843		67.00000000	0.51253731	4.57494061	1.453277
68	0.36954218	8.91944120	3.29610975		68.00000000	0.50500000	4.50431781	1.474635
69	0.37934861	8.91955470	3.38362068		69.00000000	0.49768116	4.43909432	1.496011
70	0.38950855	8.92515850	3.47642555		70.00000000	0.49057143	4.37842776	1.517487
71	0.39935443	8.91860490	3.56168438		71.00000000	0.48366197	4.31359003	1.538877
72	0.40947941	8.93109320	3.65709877		72.00000000	0.47694444	4.25963528	1.560224
73	0.41931337	8.92367650	3.74181687		73.00000000	0.47041096	4.19779522	1.581600
74	0.42943761	8.91203310	3.82716219		74.00000000	0.46405405	4.13566509	1.603077
75	0.43927234	8.93528840	3.92502504		75.00000000	0.45786667	4.09117072	1.624455
76	0.44940475	8.90733530	4.00299879		76.00000000	0.45184211	4.02470913	1.645818
77	0.45956993	8.91409780	4.09665130		77.00000000	0.44597403	3.97545608	1.667194
78	0.46944183	8.89302160	4.17475633		78.00000000	0.44025641	3.91520977	1.688669
79	0.47956532	8.89162250	4.26411379		79.00000000	0.43468354	3.86504198	1.710067
80	0.48938888	8.88269140	4.34709040		80.00000000	0.42925000	3.81289528	1.731432
81	0.49949971	8.86071870	4.42592642		81.00000000	0.42395062	3.75650716	1.752782
82	0.50931883	8.82875160	4.49664944		82.00000000	0.41878049	3.69730890	1.774253
83	0.51945347	8.80284790	4.57266989		83.00000000	0.41373494	3.64204575	1.795632
84	0.52923012	8.74194910	4.62650277		84.00000000	0.40880952	3.57379205	1.817011
85	0.53937817	8.67681120	4.68008255		85.00000000	0.40400000	3.50543172	1.838365
86	0.54950911	8.56474020	4.70640276		86.00000000	0.39930233	3.41992068	1.859831
87	0.55932820	8.40852450	4.70312487		87.00000000	0.39471264	3.31895093	1.881214
88	0.56947249	8.20085720	4.67016257		88.00000000	0.39022727	3.20019814	1.902594
89	0.57925212	7.90959840	4.58165164		89.00000000	0.38584270	3.05186078	1.924082
90	0.58939052	7.51256660	4.42783553		90.00000000	0.38155556	2.86646152	1.945464
91	0.59919173	7.00134710	4.19514928		91.00000000	0.37736264	2.64204681	1.966822
92	0.60928619	6.32804200	3.85558860		92.00000000	0.37326087	2.36201046	1.988293
93	0.61906660	5.48407030	3.39500475		93.00000000	0.36924731	2.02497822	2.009795
94	0.62920272	4.42916630	2.78684348		94.00000000	0.36531915	1.61805926	2.031190
95	0.63931954	3.12271260	1.99641118		95.00000000	0.36147368	1.12877843	2.052530
96	0.64913636	1.61216070	1.04651213		96.00000000	0.35770833	0.57668332	2.073916
97	0.65916383	-0.22394419	-0.14761591		97.00000000	0.35402062	-0.07928086	2.095402
98	0.66894495	-2.31898500	-1.55127330		98.00000000	0.35040816	-0.81259127	2.116778
99	0.67899555	-4.82256080	-3.27449732		99.00000000	0.34686869	-1.67279533	2.138137
100	0.68891507	-7.66982080	-5.28385513		100.00000000	0.34340000	-2.63381646	2.159518
101	0.69608533	-9.99549670	-6.95771862		101.00000000	0.34000000	-3.39846888	2.180991
14:17 02/04/2018
Test Lot:	JK-PERC
Recipe:	Recipe_YJX-LID
Cell Name:	1-10-60min
Test Order:	3
Test Condition:	Light
1	-0.29991665	8.92807010	-2.67767688		1.00000000	34.34000000	306.58992723	0.000000
2	-0.29013243	8.91892620	-2.58766973		2.00000000	17.17000000	153.13796285	0.061720
3	-0.27995825	8.94246100	-2.50351573		3.00000000	11.44666667	102.36137025	0.083237
4	-0.27015021	8.92001630	-2.40974428		4.00000000	8.58500000	76.57833994	0.104643
5	-0.25998494	8.92120930	-2.31938006		5.00000000	6.86800000	61.27086547	0.126067
6	-0.24983084	8.93254280	-2.23162467		6.00000000	5.72333333	51.12391996	0.147457
7	-0.24002951	8.92544650	-2.14237055		7.00000000	4.90571429	43.78569040	0.168957
8	-0.22988360	8.92841050	-2.05249515		8.00000000	4.29250000	38.32520207	0.190342
9	-0.22002943	8.92718600	-1.96424365		9.00000000	3.81555556	34.06217414	0.211711
10	-0.20989838	8.91348460	-1.87092598		10.00000000	3.43400000	30.60890612	0.233087
11	-0.20008293	8.92859460	-1.78645937		11.00000000	3.12181818	27.87344896	0.254580
12	-0.18994519	8.92172530	-1.69463881		12.00000000	2.86166667	25.53100390	0.275947
13	-0.18010665	8.92485430	-1.60742561		13.00000000	2.64153846	23.57534590	0.297336
14	-0.16998157	8.93022820	-1.51797421		14.00000000	2.45285714	21.90457403	0.318724
15	-0.16016461	8.94081880	-1.43200276		15.00000000	2.28933333	20.46851451	0.340198
16	-0.14998297	8.92399980	-1.33844799		16.00000000	2.14625000	19.15313457	0.361584
17	-0.13984822	8.93299870	-1.24926397		17.00000000	2.02000000	18.04465737	0.382941
18	-0.13005358	8.92783640	-1.16109709		18.00000000	1.90777778	17.03232789	0.404310
19	-0.11987641	8.92833420	-1.07029665		19.00000000	1.80736842	16.13678929	0.425787
20	-0.11006168	8.92043500	-0.98179806		20.00000000	1.71700000	15.31638690	0.447171
21	-0.09990832	8.92642500	-0.89182414		21.00000000	1.63523810	14.59683021	0.468515
22	-0.09009806	8.91840080	-0.80353062		22.00000000	1.56090909	13.92081289	0.489890
23	-0.07993949	8.92780300	-0.71368404		23.00000000	1.49304348	13.32959804	0.511368
24	-0.07015007	8.92719750	-0.62624353		24.00000000	1.43083333	12.77333176	0.532747
25	-0.05999150	8.92504600	-0.53542688		25.00000000	1.37360000	12.25944319	0.554103
26	-0.04986567	8.92537980	-0.44507005		26.00000000	1.32076923	11.78836701	0.575474
27	-0.04000183	8.92342570	-0.35695334		27.00000000	1.27185185	11.34927550	0.596958
28	-0.02986037	8.91672710	-0.26625681		28.00000000	1.22642857	10.93572888	0.618342
29	-0.02007096	8.91744610	-0.17898168		29.00000000	1.18413793	10.55948617	0.639737
30	-0.00993992	8.93597410	-0.08882288		30.00000000	1.14466667	10.22871169	0.661092
31	-0.00064917	8.92125990	-0.00579140		31.00000000	1.10774194	9.88245371	0.682684
32	0.00948985	8.92205050	0.08466891		32.00000000	1.07312500	9.57447544	0.704067
33	0.01933034	8.92595390	0.17254171		33.00000000	1.04060606	9.28840173	0.725454
34	0.02946034	8.91836740	0.26273814		34.00000000	1.01000000	9.00755107	0.746881
35	0.03928074	8.92422870	0.35055026		35.00000000	0.98114286	8.75594324	0.768349
36	0.04940479	8.92816070	0.44109386		36.00000000	0.95388889	8.51647329	0.789721
37	0.05924900	8.92868420	0.52901557		37.00000000	0.92810811	8.28678420	0.811116
38	0.06939612	8.91648960	0.61876975		38.00000000	0.90368421	8.05769086	0.832471
39	0.07953282	8.92871480	0.71012584		39.00000000	0.88051282	7.86184785	0.853960
40	0.08934949	8.91440200	0.79649730		40.00000000	0.85850000	7.65301412	0.875341
41	0.09950108	8.92729570	0.88827557		41.00000000	0.83756098	7.47715450	0.896744
42	0.10931627	8.93490120	0.97673007		42.00000000	0.81761905	7.30534541	0.918162
43	0.11947306	8.92274000	1.06602705		43.00000000	0.79860465	7.12574167	0.939655
44	0.12927039	8.92962550	1.15433617		44.00000000	0.78045455	6.96916681	0.961044
45	0.13943017	8.92341420	1.24419316		45.00000000	0.76311111	6.80955653	0.982424
46	0.14929000	8.92019840	1.33169642		46.00000000	0.74652174	6.65912202	1.003772
47	0.15944159	8.92996790	1.42380828		47.00000000	0.73063830	6.52457655	1.025246
48	0.16959243	8.91963390	1.51270239		48.00000000	0.71541667	6.38125475	1.046615
49	0.17940092	8.93331720	1.60264532		49.00000000	0.70081633	6.26061454	1.067992
50	0.18955772	8.92317580	1.69145686		50.00000000	0.68680000	6.12843714	1.089477
51	0.19933419	8.93331430	1.78071497		51.00000000	0.67333333	6.01509830	1.110857
52	0.20947462	8.92663000	1.86990243		52.00000000	0.66038462	5.89500912	1.132199
53	0.21929352	8.92734910	1.95770981		53.00000000	0.64792453	5.78424845	1.153590
54	0.22941832	8.93145180	2.04903867		54.00000000	0.63592593	5.67974176	1.175077
55	0.23926774	8.91515830	2.13310978		55.00000000	0.62436364	5.56630065	1.196469
56	0.24939699	8.93011670	2.22714423		56.00000000	0.61321429	5.47607513	1.217837
57	0.25953892	8.91102410	2.31275757		57.00000000	0.60245614	5.36850119	1.239208
58	0.26936823	8.92037200	2.40286482		58.00000000	0.59206897	5.28147542	1.260689
59	0.27953100	8.92995640	2.49619964		59.00000000	0.58203390	5.19753734	1.282060
60	0.28935510	8.91924380	2.58082868		60.00000000	0.57233333	5.10478053	1.303413
61	0.29951191	8.90543170	2.66728286		61.00000000	0.56295082	5.01332008	1.324793
62	0.30931741	8.94196030	2.76590400		62.00000000	0.55387097	4.95269220	1.346276
63	0.31947497	8.91423700	2.84787560		63.00000000	0.54507937	4.85896664	1.367657
64	0.32926482	8.92715260	2.93939729		64.00000000	0.53656250	4.78997532	1.389016
65	0.33940452	8.92601780	3.02953079		65.00000000	0.52830769	4.71568387	1.410396
66	0.34920704	8.91645810	3.11368994		66.00000000	0.52030303	4.63926017	1.431872
67	0.35938692	8.91472240	3.20383463		67.00000000	0.51253731	4.56912787	1.453255
68	0.36955488	8.92502780	3.29828758		68.00000000	0.50500000	4.50713904	1.474609
69	0.37935889	8.92618080	3.38622604		69.00000000	0.49768116	4.44239201	1.495983
70	0.38948965	8.91415310	3.47197037		70.00000000	0.49057143	4.37302882	1.517462
71	0.39934501	8.91367240	3.55963059		71.00000000	0.48366197	4.31120437	1.538844
72	0.40948766	8.92091270	3.65300367		72.00000000	0.47694444	4.25477975	1.560210
73	0.41931030	8.91050050	3.73626464		73.00000000	0.47041096	4.19159708	1.581574
74	0.42945370	8.90629100	3.82483962		74.00000000	0.46405405	4.13300045	1.603055
75	0.43927708	8.93063070	3.92302138		75.00000000	0.45786667	4.08903811	1.624437
76	0.44942790	8.90903190	4.00396750		76.00000000	0.45184211	4.02547573	1.645825
77	0.45954007	8.90581230	4.09257761		77.00000000	0.44597403	3.97176097	1.667166
78	0.46944454	8.89491270	4.17566820		78.00000000	0.44025641	3.91604233	1.688636
79	0.47958496	8.88682840	4.26198924		79.00000000	0.43468354	3.86295807	1.710015
80	0.48940238	8.88524340	4.34845927		80.00000000	0.42925000	3.81399073	1.731400
81	0.49952644	8.85333730	4.42247606		81.00000000	0.42395062	3.75337781	1.752894
82	0.50932974	8.83516310	4.50001132		82.00000000	0.41878049	3.69999391	1.774267
83	0.51944631	8.80147650	4.57189449		83.00000000	0.41373494	3.64147835	1.795617
84	0.52928609	8.74584390	4.62905352		84.00000000	0.40880952	3.57538428	1.817001
85	0.53939003	8.67164900	4.67740101		85.00000000	0.40400000	3.50334620	1.838475
86	0.54954010	8.56674100	4.70776771		86.00000000	0.39930233	3.42071960	1.859879
87	0.55935830	8.41070460	4.70459743		87.00000000	0.39471264	3.31981145	1.881225
88	0.56946743	8.19584180	4.66726497		88.00000000	0.39022727	3.19824099	1.902604
89	0.57927966	7.92303900	4.58965534		89.00000000	0.38584270	3.05704673	1.924070
90	0.58940744	7.52623890	4.43602120		90.00000000	0.38155556	2.87167826	1.945446
91	0.59920102	7.01398370	4.20278619		91.00000000	0.37736264	2.64681539	1.966792
92	0.60932434	6.34701540	3.86739097		92.00000000	0.37326087	2.36909249	1.988264
93	0.61911494	5.50758980	3.40983113		93.00000000	0.36924731	2.03366273	2.009764
94	0.62922114	4.44287820	2.79555289		94.00000000	0.36531915	1.62306848	2.031151
95	0.63930726	3.14553070	2.01096061		95.00000000	0.36147368	1.13702657	2.052504
96	0.64911276	1.62043340	1.05184400		96.00000000	0.35770833	0.57964253	2.073888
97	0.65915197	-0.22755824	-0.14999546		97.00000000	0.35402062	-0.08056031	2.095367
98	0.66895080	-2.31843230	-1.55091714		98.00000000	0.35040816	-0.81239760	2.116814
99	0.67900187	-4.85280130	-3.29506116		99.00000000	0.34686869	-1.68328481	2.138176
100	0.68888849	-7.71604300	-5.31549321		100.00000000	0.34340000	-2.64968917	2.159558
101	0.69586664	-9.99596500	-6.95585858		101.00000000	0.34000000	-3.39862810	2.181042
14:18 02/04/2018
Test Lot:	JK-PERC
Recipe:	Recipe_YJX-LID
Cell Name:	1-10-60min
Test Order:	4
Test Condition:	Light
1	-0.29993492	8.92883400	-2.67806911		1.00000000	34.34000000	306.61615956	0.000000
2	-0.29012018	8.93611910	-2.59254848		2.00000000	17.17000000	153.43316495	0.061722
3	-0.27997872	8.92359070	-2.49841550		3.00000000	11.44666667	102.14536821	0.083265
4	-0.27020493	8.92776110	-2.41232506		4.00000000	8.58500000	76.64482904	0.104644
5	-0.26001284	8.93228050	-2.32250762		5.00000000	6.86800000	61.34690247	0.125984
6	-0.24983044	8.91668990	-2.22766056		6.00000000	5.72333333	51.03318853	0.147360
7	-0.24004845	8.93379210	-2.14454295		7.00000000	4.90571429	43.82663153	0.168848
8	-0.22984447	8.91928100	-2.05004741		8.00000000	4.29250000	38.28601369	0.190226
9	-0.22004759	8.92553330	-1.96404209		9.00000000	3.81555556	34.05586817	0.211583
10	-0.20989273	8.92730240	-1.87377587		10.00000000	3.43400000	30.65635644	0.232957
11	-0.20007725	8.92884250	-1.78645825		11.00000000	3.12181818	27.87422286	0.254432
12	-0.18992014	8.91916470	-1.69392901		12.00000000	2.86166667	25.52367632	0.275829
13	-0.18012998	8.93635560	-1.60970556		13.00000000	2.64153846	23.60572702	0.297180
14	-0.16997288	8.92252540	-1.51658734		14.00000000	2.45285714	21.88568016	0.318549
15	-0.16015665	8.92358020	-1.42917071		15.00000000	2.28933333	20.42904960	0.340041
16	-0.15001592	8.93152620	-1.33987112		16.00000000	2.14625000	19.16928811	0.361406
17	-0.13988860	8.92375560	-1.24833168		17.00000000	2.02000000	18.02598631	0.382821
18	-0.13004632	8.92675110	-1.16089113		18.00000000	1.90777778	17.03025738	0.404213
19	-0.11989890	8.92093850	-1.06961071		19.00000000	1.80736842	16.12342253	0.425694
20	-0.11007226	8.92809490	-0.98273558		20.00000000	1.71700000	15.32953894	0.447087
21	-0.09990474	8.91977500	-0.89112778		21.00000000	1.63523810	14.58595588	0.468468
22	-0.09015029	8.92361740	-0.80446669		22.00000000	1.56090909	13.92895552	0.489808
23	-0.08000957	8.92980670	-0.71446995		23.00000000	1.49304348	13.33258966	0.511290
24	-0.07015315	8.93155100	-0.62657641		24.00000000	1.43083333	12.77956089	0.532654
25	-0.06001614	8.92336650	-0.53554605		25.00000000	1.37360000	12.25713622	0.554032
26	-0.04984193	8.93121240	-0.44514883		26.00000000	1.32076923	11.79607053	0.575453
27	-0.04000635	8.93048100	-0.35727598		27.00000000	1.27185185	11.35824880	0.596922
28	-0.02990507	8.93224330	-0.26711939		28.00000000	1.22642857	10.95475839	0.618307
29	-0.02008141	8.91848370	-0.17909571		29.00000000	1.18413793	10.56071484	0.639668
30	-0.00991612	8.93073650	-0.08855826		30.00000000	1.14466667	10.22271638	0.661025
31	-0.00066927	8.92866230	-0.00597566		31.00000000	1.10774194	9.89065366	0.682619
32	0.00947944	8.91874220	0.08454466		32.00000000	1.07312500	9.57092522	0.704005
33	0.01928720	8.92391590	0.17211731		33.00000000	1.04060606	9.28628097	0.725360
34	0.02940009	8.92172150	0.26229944		34.00000000	1.01000000	9.01093872	0.746727
35	0.03926144	8.92601390	0.35044814		35.00000000	0.98114286	8.75769478	0.768211
36	0.04941750	8.92391400	0.44099755		36.00000000	0.95388889	8.51242241	0.789588
37	0.05921558	8.92218690	0.52833250		37.00000000	0.92810811	8.28075400	0.810976
38	0.06938952	8.93695350	0.62013087		38.00000000	0.90368421	8.07618377	0.832331
39	0.07951953	8.91667650	0.70904995		39.00000000	0.88051282	7.85124797	0.853816
40	0.08936226	8.93834020	0.79875032		40.00000000	0.85850000	7.67356506	0.875219
41	0.09951015	8.92208860	0.88783836		41.00000000	0.83756098	7.47279323	0.896600
42	0.10933353	8.91525750	0.97473657		42.00000000	0.81761905	7.28928435	0.918096
43	0.11949034	8.95115380	1.06957641		43.00000000	0.79860465	7.14843306	0.939476
44	0.12931298	8.91317840	1.15258966		44.00000000	0.78045455	6.95633060	0.960818
45	0.13941769	8.94249060	1.24674138		45.00000000	0.76311111	6.82411394	0.982202
46	0.14926936	8.91012100	1.33000806		46.00000000	0.74652174	6.65159902	1.003679
47	0.15940906	8.91936490	1.42182757		47.00000000	0.73063830	6.51682959	1.025054
48	0.16958001	8.92985530	1.51432495		48.00000000	0.71541667	6.38856731	1.046412
49	0.17939149	8.91609860	1.59947221		49.00000000	0.70081633	6.24854747	1.067782
50	0.18949397	8.94499590	1.69502278		50.00000000	0.68680000	6.14342318	1.089267
51	0.19931139	8.92875390	1.77960235		51.00000000	0.67333333	6.01202763	1.110658
52	0.20946895	8.92574500	1.86966643		52.00000000	0.66038462	5.89442468	1.132003
53	0.21929531	8.91751380	1.95556895		53.00000000	0.64792453	5.77787592	1.153367
54	0.22944170	8.93269060	2.04953172		54.00000000	0.63592593	5.68052954	1.174853
55	0.23924872	8.92526630	2.13535854		55.00000000	0.62436364	5.57261172	1.196234
56	0.24940255	8.92651270	2.22629503		56.00000000	0.61321429	5.47386511	1.217592
57	0.25951767	8.92568020	2.31637173		57.00000000	0.60245614	5.37733084	1.238978
58	0.26934627	8.91183280	2.40036892		58.00000000	0.59206897	5.27641963	1.260453
59	0.27948448	8.93502430	2.49720062		59.00000000	0.58203390	5.20048702	1.281848
60	0.28929672	8.91504570	2.57909348		60.00000000	0.57233333	5.10237782	1.303210
61	0.29948401	8.93537430	2.67600173		61.00000000	0.56295082	5.03017629	1.324578
62	0.30929402	8.91906930	2.75861480		62.00000000	0.55387097	4.94001354	1.346053
63	0.31944039	8.93670650	2.85474501		63.00000000	0.54507937	4.87121430	1.367427
64	0.32925114	8.91904450	2.93660557		64.00000000	0.53656250	4.78562481	1.388792
65	0.33941391	8.93203350	3.03165641		65.00000000	0.52830769	4.71886201	1.410164
66	0.34921125	8.90918640	3.11118812		66.00000000	0.52030303	4.63547668	1.431651
67	0.35937849	8.92870040	3.20878287		67.00000000	0.51253731	4.57629212	1.453024
68	0.36952785	8.92671110	3.29866836		68.00000000	0.50500000	4.50798911	1.474417
69	0.37936684	8.91865060	3.38344030		69.00000000	0.49768116	4.43864437	1.495763
70	0.38949537	8.91831210	3.47364127		70.00000000	0.49057143	4.37506911	1.517237
71	0.39931282	8.91951660	3.56167733		71.00000000	0.48366197	4.31403099	1.538602
72	0.40948749	8.91717340	3.65147095		72.00000000	0.47694444	4.25299631	1.559982
73	0.41931385	8.92312150	3.74158843		73.00000000	0.47041096	4.19753414	1.581472
74	0.42943791	8.91282460	3.82750477		74.00000000	0.46405405	4.13603239	1.602841
75	0.43925461	8.90617750	3.91207952		75.00000000	0.45786667	4.07784180	1.624183
76	0.44941884	8.90899470	4.00387006		76.00000000	0.45184211	4.02545892	1.645560
77	0.45954666	8.90458010	4.09207004		77.00000000	0.44597403	3.97121144	1.667028
78	0.46942437	8.90384100	4.17967995		78.00000000	0.44025641	3.91997308	1.688410
79	0.47955438	8.88416100	4.26043832		79.00000000	0.43468354	3.86179859	1.709771
80	0.48941201	8.89019390	4.35096767		80.00000000	0.42925000	3.81611573	1.731147
81	0.49950182	8.85864930	4.42491145		81.00000000	0.42395062	3.75562984	1.752621
82	0.50934458	8.83122920	4.49813873		82.00000000	0.41878049	3.69834647	1.774017
83	0.51948351	8.80857090	4.57590733		83.00000000	0.41373494	3.64441355	1.795375
84	0.52925849	8.72886280	4.61982474		84.00000000	0.40880952	3.56844224	1.816737
85	0.53939521	8.68152620	4.68277365		85.00000000	0.40400000	3.50733658	1.838231
86	0.54952675	8.57073020	4.70984551		86.00000000	0.39930233	3.42231250	1.859603
87	0.55934864	8.40280530	4.70009772		87.00000000	0.39471264	3.31669349	1.880963
88	0.56946528	8.20903870	4.67476252		88.00000000	0.39022727	3.20339078	1.902337
89	0.57925439	7.91219520	4.58317380		89.00000000	0.38584270	3.05286273	1.923818
90	0.58936507	7.52184630	4.43311347		90.00000000	0.38155556	2.87000224	1.945214
91	0.59916538	7.01434610	4.20275335		91.00000000	0.37736264	2.64695214	1.966565
92	0.60930806	6.32843540	3.85596670		92.00000000	0.37326087	2.36215730	1.988040
93	0.61909574	5.50163600	3.40603941		93.00000000	0.36924731	2.03146430	2.009541
94	0.62921679	4.43827680	2.79263828		94.00000000	0.36531915	1.62138750	2.030931
95	0.63930368	3.14247060	2.00899302		95.00000000	0.36147368	1.13592043	2.052309
96	0.64909655	1.61763930	1.05000409		96.00000000	0.35770833	0.57864306	2.073672
97	0.65915883	-0.22829938	-0.15048555		97.00000000	0.35402062	-0.08082269	2.095198
98	0.66896361	-2.33196310	-1.55999845		98.00000000	0.35040816	-0.81713891	2.116585
99	0.67897451	-4.85971780	-3.29962451		99.00000000	0.34686869	-1.68568393	2.137970
100	0.68887460	-7.72514680	-5.32165741		100.00000000	0.34340000	-2.65281541	2.159317
101	0.69579983	-9.99616430	-6.95532942		101.00000000	0.34000000	-3.39869586	2.180797
