# Supplementary material for: Study on the Electrical Injection Regeneration of Industrialized B-Doped Czochralski Silicon PERC Solar Cells
Source: Hindawi journal article supplement (doi:10.1155/2019/5357370), 2019-06-20
Supplement: f1 [file 5357370.f1.zip › section3.2/IVRawData_1-10-after.csv]

12:02 02/04/2018
Test Lot:	JK-PERC
Recipe:	Recipe_YJX-LID
Cell Name:	1-10-after
Test Order:	2
Test Condition:	Light
1	-0.29988697	8.95836450	-2.68649679		1.00000000	34.34000000	307.63023693	0.000000
2	-0.29010528	8.92886070	-2.59030963		2.00000000	17.17000000	153.30853822	0.061792
3	-0.27996111	8.94287970	-2.50365853		3.00000000	11.44666667	102.36616297	0.083200
4	-0.27015263	8.91829870	-2.40930185		4.00000000	8.58500000	76.56359434	0.104706
5	-0.26000252	8.93769260	-2.32382260		5.00000000	6.86800000	61.38407278	0.126142
6	-0.24983676	8.95194440	-2.23652478		6.00000000	5.72333333	51.23496178	0.147498
7	-0.24003498	8.94202330	-2.14639838		7.00000000	4.90571429	43.86701145	0.168871
8	-0.22985657	8.94037910	-2.05500487		8.00000000	4.29250000	38.37657729	0.190362
9	-0.22007637	8.93021770	-1.96532989		9.00000000	3.81555556	34.07374176	0.211745
10	-0.20992178	8.94272230	-1.87727218		10.00000000	3.43400000	30.70930838	0.233136
11	-0.20010437	8.93663120	-1.78825896		11.00000000	3.12181818	27.89853776	0.254472
12	-0.18996318	8.93524930	-1.69736837		12.00000000	2.86166667	25.56970508	0.275938
13	-0.18016809	8.94101720	-1.61088599		13.00000000	2.64153846	23.61804082	0.297310
14	-0.17000531	8.93634890	-1.51922677		14.00000000	2.45285714	21.91958723	0.318683
15	-0.16019088	8.93056680	-1.43059535		15.00000000	2.28933333	20.44504426	0.340081
16	-0.15006979	8.93210220	-1.34043870		16.00000000	2.14625000	19.17052435	0.361545
17	-0.13989808	8.94201850	-1.25097122		17.00000000	2.02000000	18.06287737	0.382912
18	-0.13008587	8.92220880	-1.16065329		18.00000000	1.90777778	17.02159168	0.404304
19	-0.11991416	8.94080160	-1.07212871		19.00000000	1.80736842	16.15932247	0.425790
20	-0.11013173	8.93829350	-0.98438973		20.00000000	1.71700000	15.34704994	0.447174
21	-0.09995481	8.93618200	-0.89321441		21.00000000	1.63523810	14.61278523	0.468530
22	-0.09012028	8.94088360	-0.80575492		22.00000000	1.56090909	13.95590649	0.489899
23	-0.07996271	8.93288140	-0.71429739		23.00000000	1.49304348	13.33718032	0.511375
24	-0.07014604	8.93674950	-0.62687758		24.00000000	1.43083333	12.78699908	0.532754
25	-0.06001229	8.94315620	-0.53669930		25.00000000	1.37360000	12.28431936	0.554099
26	-0.04984580	8.92292500	-0.44477030		26.00000000	1.32076923	11.78512479	0.575474
27	-0.04001722	8.94962980	-0.35813928		27.00000000	1.27185185	11.38260323	0.596952
28	-0.02990580	8.92396450	-0.26687828		28.00000000	1.22642857	10.94460503	0.618327
29	-0.02005861	8.94291780	-0.17938250		29.00000000	1.18413793	10.58964818	0.639698
30	-0.00993528	8.93154430	-0.08873742		30.00000000	1.14466667	10.22364104	0.661079
31	-0.00064335	8.92506120	-0.00574192		31.00000000	1.10774194	9.88666457	0.682668
32	0.00948275	8.94297310	0.08480396		32.00000000	1.07312500	9.59692801	0.704064
33	0.01932147	8.92865750	0.17251479		33.00000000	1.04060606	9.29121511	0.725426
34	0.02944376	8.92970560	0.26292414		34.00000000	1.01000000	9.01900266	0.746791
35	0.03924155	8.93333720	0.35055799		35.00000000	0.98114286	8.76487998	0.768277
36	0.04943529	8.93024250	0.44146914		36.00000000	0.95388889	8.51845910	0.789644
37	0.05923308	8.93217370	0.52908013		37.00000000	0.92810811	8.29002283	0.810981
38	0.06939258	8.92452720	0.61929600		38.00000000	0.90368421	8.06495432	0.832357
39	0.07954242	8.93869880	0.71100574		39.00000000	0.88051282	7.87063889	0.853848
40	0.08931416	8.93728350	0.79822592		40.00000000	0.85850000	7.67265788	0.875259
41	0.09946622	8.93545440	0.88877587		41.00000000	0.83756098	7.48398790	0.896658
42	0.10930196	8.93328860	0.97642595		42.00000000	0.81761905	7.30402692	0.918019
43	0.11944956	8.93267250	1.06700380		43.00000000	0.79860465	7.13367381	0.939490
44	0.12926446	8.93817520	1.15538839		44.00000000	0.78045455	6.97583946	0.960872
45	0.13942322	8.93027110	1.24508715		45.00000000	0.76311111	6.81478910	0.982255
46	0.14923367	8.93912790	1.33401886		46.00000000	0.74652174	6.67325331	1.003616
47	0.15939318	8.93060680	1.42347782		47.00000000	0.73063830	6.52504335	1.025098
48	0.16955194	8.93547820	1.51502766		48.00000000	0.71541667	6.39259003	1.046465
49	0.17936982	8.93490030	1.60265146		49.00000000	0.70081633	6.26172401	1.067853
50	0.18950923	8.93357560	1.69299503		50.00000000	0.68680000	6.13557972	1.089349
51	0.19928469	8.93390750	1.78039099		51.00000000	0.67333333	6.01549772	1.110722
52	0.20943229	8.92829230	1.86987270		52.00000000	0.66038462	5.89610688	1.132097
53	0.21926208	8.93720530	1.95959022		53.00000000	0.64792453	5.79063453	1.153483
54	0.22940148	8.92574210	2.04757845		54.00000000	0.63592593	5.67611081	1.174956
55	0.23922607	8.94021220	2.13873183		55.00000000	0.62436364	5.58194340	1.196339
56	0.24937293	8.93143750	2.22725874		56.00000000	0.61321429	5.47688507	1.217699
57	0.25954062	8.92905620	2.31745278		57.00000000	0.60245614	5.37936474	1.239089
58	0.26934734	8.93522740	2.40667973		58.00000000	0.59206897	5.29027084	1.260575
59	0.27950311	8.93577480	2.49757685		59.00000000	0.58203390	5.20092384	1.281941
60	0.28934109	8.91713240	2.58009281		60.00000000	0.57233333	5.10357211	1.303291
61	0.29947901	8.94328690	2.67832671		61.00000000	0.56295082	5.03463069	1.324671
62	0.30929020	8.93301960	2.76289542		62.00000000	0.55387097	4.94774021	1.346158
63	0.31944823	8.92638300	2.85151725		63.00000000	0.54507937	4.86558718	1.367543
64	0.32927281	8.93648910	2.94254288		64.00000000	0.53656250	4.79498493	1.388896
65	0.33940476	8.94354530	3.03548185		65.00000000	0.52830769	4.72494378	1.410271
66	0.34924796	8.92931180	3.11854393		66.00000000	0.52030303	4.64594799	1.431745
67	0.35937324	8.92230220	3.20643665		67.00000000	0.51253731	4.57301280	1.453130
68	0.36956176	8.93911080	3.30355352		68.00000000	0.50500000	4.51425095	1.474493
69	0.37934616	8.91727920	3.38273562		69.00000000	0.49768116	4.43796185	1.495874
70	0.38950118	8.94306660	3.48333499		70.00000000	0.49057143	4.38721296	1.517392
71	0.39933395	8.92618270	3.56452780		71.00000000	0.48366197	4.31725513	1.538781
72	0.40945774	8.93490220	3.65846486		72.00000000	0.47694444	4.26145197	1.560140
73	0.41928604	8.92253110	3.74109273		73.00000000	0.47041096	4.19725641	1.581496
74	0.42941058	8.93230250	3.83562520		74.00000000	0.46405405	4.14507119	1.602969
75	0.43922770	8.91603760	3.91617069		75.00000000	0.45786667	4.08235642	1.624348
76	0.44939688	8.90815540	4.00329724		76.00000000	0.45184211	4.02507969	1.645728
77	0.45954150	8.92372420	4.10082160		77.00000000	0.44597403	3.97974921	1.667096
78	0.46941820	8.91663360	4.18563009		78.00000000	0.44025641	3.92560510	1.688569
79	0.47951964	8.89624310	4.26592329		79.00000000	0.43468354	3.86705048	1.709947
80	0.48934275	8.89100650	4.35074957		80.00000000	0.42925000	3.81646454	1.731335
81	0.49950522	8.87918090	4.43519721		81.00000000	0.42395062	3.76433422	1.752823
82	0.50930154	8.83094120	4.49761195		82.00000000	0.41878049	3.69822586	1.774212
83	0.51944166	8.81609820	4.57944868		83.00000000	0.41373494	3.64752786	1.795552
84	0.52921045	8.75563910	4.63357571		84.00000000	0.40880952	3.57938865	1.816924
85	0.53934389	8.69322970	4.68864032		85.00000000	0.40400000	3.51206480	1.838410
86	0.54950786	8.57556530	4.71234054		86.00000000	0.39930233	3.42424317	1.859791
87	0.55932724	8.43050190	4.71540936		87.00000000	0.39471264	3.32762569	1.881139
88	0.56945771	8.21149730	4.67610045		88.00000000	0.39022727	3.20435020	1.902517
89	0.57926440	7.92475890	4.59053071		89.00000000	0.38584270	3.05771034	1.923994
90	0.58937633	7.52763750	4.43661136		90.00000000	0.38155556	2.87221191	1.945368
91	0.59918302	7.02060650	4.20662820		91.00000000	0.37736264	2.64931458	1.966733
92	0.60931426	6.33849140	3.86213320		92.00000000	0.37326087	2.36591081	1.988204
93	0.61909717	5.53271200	3.42528634		93.00000000	0.36924731	2.04293903	2.009705
94	0.62923133	4.47025680	2.81282563		94.00000000	0.36531915	1.63307041	2.031102
95	0.63932461	3.20267060	2.04754613		95.00000000	0.36147368	1.15768114	2.052456
96	0.64910007	1.72114500	1.11719534		96.00000000	0.35770833	0.61566791	2.073835
97	0.65916502	-0.07029605	-0.04633670		97.00000000	0.35402062	-0.02488625	2.095323
98	0.66896653	-2.10926150	-1.41102535		98.00000000	0.35040816	-0.73910245	2.116691
99	0.67900622	-4.55462650	-3.09261972		99.00000000	0.34686869	-1.57985731	2.138109
100	0.68882191	-7.32626910	-5.04649467		100.00000000	0.34340000	-2.51584081	2.159498
101	0.69725984	-9.99382500	-6.96829282		101.00000000	0.34000000	-3.39790050	2.180988
12:02 02/04/2018
Test Lot:	JK-PERC
Recipe:	Recipe_YJX-LID
Cell Name:	1-10-after
Test Order:	3
Test Condition:	Light
1	-0.29992718	8.92895130	-2.67803518		1.00000000	34.34000000	306.62018764	0.000000
2	-0.29007775	8.92198850	-2.58807035		2.00000000	17.17000000	153.19054255	0.021618
3	-0.27996111	8.94626900	-2.50460740		3.00000000	11.44666667	102.40495915	0.043020
4	-0.27016678	8.92398260	-2.41096364		4.00000000	8.58500000	76.61239062	0.064379
5	-0.26002038	8.93165490	-2.32241230		5.00000000	6.86800000	61.34260585	0.085765
6	-0.24985313	8.93481060	-2.23239039		6.00000000	5.72333333	51.13689933	0.107265
7	-0.24006103	8.93084050	-2.14394677		7.00000000	4.90571429	43.81215182	0.128645
8	-0.22990197	8.93345360	-2.05381858		8.00000000	4.29250000	38.34684958	0.150029
9	-0.22005032	8.92445850	-1.96382995		9.00000000	3.81555556	34.05176721	0.171398
10	-0.20992103	8.93895440	-1.87647451		10.00000000	3.43400000	30.69636941	0.192888
11	-0.20009319	8.92462730	-1.78575715		11.00000000	3.12181818	27.86106377	0.214274
12	-0.18994978	8.94218830	-1.69856670		12.00000000	2.86166667	25.58956219	0.235665
13	-0.18012789	8.92945670	-1.60844419		13.00000000	2.64153846	23.58750331	0.257007
14	-0.16999936	8.92149640	-1.51664868		14.00000000	2.45285714	21.88315617	0.278496
15	-0.16020353	8.93810180	-1.43191546		15.00000000	2.28933333	20.46229439	0.299880
16	-0.15002140	8.92468740	-1.33889410		16.00000000	2.14625000	19.15461033	0.321268
17	-0.13987872	8.93043330	-1.24917758		17.00000000	2.02000000	18.03947527	0.342762
18	-0.13005386	8.93062500	-1.16146225		18.00000000	1.90777778	17.03764792	0.364151
19	-0.11990672	8.92631630	-1.07032531		19.00000000	1.80736842	16.13314220	0.385525
20	-0.11008111	8.92529110	-0.98250595		20.00000000	1.71700000	15.32472482	0.406902
21	-0.09992653	8.92764950	-0.89210904		21.00000000	1.63523810	14.59883256	0.428402
22	-0.09009869	8.92307850	-0.80395772		22.00000000	1.56090909	13.92811435	0.449794
23	-0.07997090	8.93000410	-0.71414043		23.00000000	1.49304348	13.33288438	0.471150
24	-0.07013488	8.91779520	-0.62544848		24.00000000	1.43083333	12.75987863	0.492531
25	-0.05998699	8.93649100	-0.53607316		25.00000000	1.37360000	12.27516404	0.514024
26	-0.04983984	8.91681670	-0.44441274		26.00000000	1.32076923	11.77705713	0.535415
27	-0.04002689	8.92477040	-0.35723082		27.00000000	1.27185185	11.35098576	0.556772
28	-0.02988570	8.93345740	-0.26698265		28.00000000	1.22642857	10.95624740	0.578161
29	-0.02008168	8.91131500	-0.17895421		29.00000000	1.18413793	10.55222611	0.599630
30	-0.00991668	8.93122390	-0.08856805		30.00000000	1.14466667	10.22327429	0.621032
31	-0.00068131	8.91919330	-0.00607671		31.00000000	1.10774194	9.88016445	0.642511
32	0.00948126	8.93306830	0.08469674		32.00000000	1.07312500	9.58629892	0.663899
33	0.01928425	8.91151520	0.17185192		33.00000000	1.04060606	9.27337673	0.685372
34	0.02942218	8.93788430	0.26297203		34.00000000	1.01000000	9.02726314	0.706749
35	0.03924750	8.91263010	0.34979847		35.00000000	0.98114286	8.74456336	0.728110
36	0.04938617	8.92402460	0.44072340		36.00000000	0.95388889	8.51252791	0.749505
37	0.05923531	8.94461630	0.52983714		37.00000000	0.92810811	8.30157091	0.770995
38	0.06936430	8.91860580	0.61863287		38.00000000	0.90368421	8.05960324	0.792376
39	0.07952455	8.90709400	0.70833268		39.00000000	0.88051282	7.84281046	0.813759
40	0.08932308	8.94314670	0.79882942		40.00000000	0.85850000	7.67769144	0.835125
41	0.09946547	8.92217730	0.88744859		41.00000000	0.83756098	7.47286752	0.856639
42	0.10929675	8.93137450	0.97617021		42.00000000	0.81761905	7.30246191	0.878043
43	0.11945701	8.91893290	1.06542906		43.00000000	0.79860465	7.12270130	0.899437
44	0.12924883	8.94226170	1.15577686		44.00000000	0.78045455	6.97902879	0.920796
45	0.13941653	8.92025280	1.24363069		45.00000000	0.76311111	6.80714403	0.942274
46	0.14926121	8.92904280	1.33275973		46.00000000	0.74652174	6.66572456	0.963658
47	0.15936713	8.92249580	1.42195255		47.00000000	0.73063830	6.51911714	0.985058
48	0.16952589	8.93242740	1.51427770		48.00000000	0.71541667	6.39040744	1.006551
49	0.17936610	8.92400260	1.60066354		49.00000000	0.70081633	6.25408672	1.027927
50	0.18949285	8.94083500	1.69422431		50.00000000	0.68680000	6.14056548	1.049294
51	0.19930626	8.91968730	1.77774952		51.00000000	0.67333333	6.00592278	1.070676
52	0.20945238	8.92884060	1.87016691		52.00000000	0.66038462	5.89646897	1.092158
53	0.21926133	8.93964000	1.96011736		53.00000000	0.64792453	5.79221203	1.113570
54	0.22940446	8.91921330	2.04610731		54.00000000	0.63592593	5.67195898	1.134933
55	0.23924021	8.93223570	2.13694994		55.00000000	0.62436364	5.57696316	1.156319
56	0.24937144	8.92846580	2.22650437		56.00000000	0.61321429	5.47506278	1.177815
57	0.25952500	8.93001560	2.31756230		57.00000000	0.60245614	5.37994273	1.199246
58	0.26934510	8.92561820	2.40407153		58.00000000	0.59206897	5.28458153	1.220634
59	0.27950236	8.93242260	2.49663320		59.00000000	0.58203390	5.19897275	1.242022
60	0.28932771	8.92829700	2.58320373		60.00000000	0.57233333	5.10996198	1.263523
61	0.29947233	8.92795180	2.67367453		61.00000000	0.56295082	5.02599778	1.284916
62	0.30928573	8.92691040	2.76096600		62.00000000	0.55387097	4.94435650	1.306274
63	0.31943780	8.92606260	2.85132180		63.00000000	0.54507937	4.86541253	1.327661
64	0.32923186	8.91591260	2.93540249		64.00000000	0.53656250	4.78394435	1.349141
65	0.33938468	8.92349050	3.02849597		65.00000000	0.52830769	4.71434867	1.370548
66	0.34920105	8.92989920	3.11833018		66.00000000	0.52030303	4.64625361	1.391904
67	0.35935536	8.91742800	3.20452555		67.00000000	0.51253731	4.57051459	1.413286
68	0.36949700	8.92874910	3.29914601		68.00000000	0.50500000	4.50901830	1.434785
69	0.37933424	8.91902640	3.38329210		69.00000000	0.49768116	4.43883140	1.456169
70	0.38948333	8.92948150	3.47788419		70.00000000	0.49057143	4.38054850	1.477601
71	0.39929080	8.92191220	3.56243746		71.00000000	0.48366197	4.31518965	1.498959
72	0.40944731	8.92283630	3.65343132		72.00000000	0.47694444	4.25569720	1.520439
73	0.41925403	8.91475390	3.73754650		73.00000000	0.47041096	4.19359793	1.541832
74	0.42943662	8.92733570	3.83372487		74.00000000	0.46405405	4.14276632	1.563225
75	0.43921950	8.90771870	3.91244375		75.00000000	0.45786667	4.07854747	1.584586
76	0.44940954	8.92061040	4.00900742		76.00000000	0.45184211	4.03070738	1.606064
77	0.45955417	8.90730760	4.09339035		77.00000000	0.44597403	3.97242783	1.627450
78	0.46939215	8.90527530	4.18006632		78.00000000	0.44025641	3.92060454	1.648850
79	0.47952336	8.89964770	4.26758897		79.00000000	0.43468354	3.86853041	1.670348
80	0.48933753	8.88191130	4.34625254		80.00000000	0.42925000	3.81256043	1.691731
81	0.49948663	8.86607070	4.42848378		81.00000000	0.42395062	3.75877615	1.713095
82	0.50930893	8.83664040	4.50057987		82.00000000	0.41878049	3.70061258	1.734478
83	0.51946402	8.80866910	4.57578666		83.00000000	0.41373494	3.64445418	1.755963
84	0.52923125	8.75565910	4.63376841		84.00000000	0.40880952	3.57939683	1.777360
85	0.53937590	8.68060590	4.68210962		85.00000000	0.40400000	3.50696478	1.798710
86	0.54951233	8.55533700	4.70126317		86.00000000	0.39930233	3.41616596	1.820141
87	0.55930787	8.42087270	4.70986037		87.00000000	0.39471264	3.32382493	1.841633
88	0.56945920	8.18620110	4.66170753		88.00000000	0.39022727	3.19447893	1.863026
89	0.57922423	7.89148950	4.57094193		89.00000000	0.38584270	3.04487359	1.884394
90	0.58939046	7.50073720	4.42086295		90.00000000	0.38155556	2.86194795	1.905783
91	0.59918004	6.99124050	4.18901176		91.00000000	0.37736264	2.63823295	1.927270
92	0.60929418	6.29975220	3.83840235		92.00000000	0.37326087	2.35145098	1.948659
93	0.61906815	5.47918940	3.39199165		93.00000000	0.36924731	2.02317596	1.970022
94	0.62920606	4.41608910	2.77863002		94.00000000	0.36531915	1.61328191	1.991521
95	0.63931865	3.13362150	2.00338267		95.00000000	0.36147368	1.13272171	2.013035
96	0.64912838	1.66201220	1.07885929		96.00000000	0.35770833	0.59451561	2.034471
97	0.65912783	-0.14827317	-0.09773097		97.00000000	0.35402062	-0.05249176	2.055842
98	0.66895092	-2.17492600	-1.45491875		98.00000000	0.35040816	-0.76211182	2.077237
99	0.67899877	-4.60902210	-3.12952034		99.00000000	0.34686869	-1.59872544	2.098739
100	0.68885016	-7.35967970	-5.06971654		100.00000000	0.34340000	-2.52731401	2.120137
101	0.69719213	-9.99407200	-6.96778835		101.00000000	0.34000000	-3.39798448	2.141524
12:02 02/04/2018
Test Lot:	JK-PERC
Recipe:	Recipe_YJX-LID
Cell Name:	1-10-after
Test Order:	4
Test Condition:	Light
1	-0.29988077	8.92748550	-2.67718123		1.00000000	34.34000000	306.56985207	0.000000
2	-0.29008716	8.93785100	-2.59275581		2.00000000	17.17000000	153.46290167	0.061814
3	-0.27996758	8.91525940	-2.49598360		3.00000000	11.44666667	102.05000260	0.083234
4	-0.27012038	8.94724180	-2.41683235		4.00000000	8.58500000	76.81207085	0.104721
5	-0.25994200	8.92247770	-2.31932670		5.00000000	6.86800000	61.27957684	0.126096
6	-0.24979784	8.93341540	-2.23154787		6.00000000	5.72333333	51.12891414	0.147429
7	-0.23998788	8.92921830	-2.14290417		7.00000000	4.90571429	43.80419377	0.168809
8	-0.22981246	8.92658810	-2.05144117		8.00000000	4.29250000	38.31737942	0.190297
9	-0.22000621	8.93077850	-1.96482673		9.00000000	3.81555556	34.07588152	0.211664
10	-0.20985462	8.92912480	-1.87381809		10.00000000	3.43400000	30.66261456	0.233068
11	-0.20003720	8.93372060	-1.78707645		11.00000000	3.12181818	27.88945140	0.254416
12	-0.18989751	8.93149950	-1.69606952		12.00000000	2.86166667	25.55897440	0.275893
13	-0.18015155	8.93408300	-1.60948890		13.00000000	2.64153846	23.59972386	0.297278
14	-0.16996348	8.93268780	-1.51823070		14.00000000	2.45285714	21.91060708	0.318662
15	-0.16014013	8.92096710	-1.42860483		15.00000000	2.28933333	20.42306735	0.340070
16	-0.15003690	8.92471030	-1.33903587		16.00000000	2.14625000	19.15465948	0.361545
17	-0.13988753	8.93029790	-1.24923732		17.00000000	2.02000000	18.03920176	0.382913
18	-0.13004333	8.91842370	-1.15978152		18.00000000	1.90777778	17.01437055	0.404270
19	-0.11991183	8.94169900	-1.07221549		19.00000000	1.80736842	16.16094440	0.425631
20	-0.11007283	8.92172150	-0.98203913		20.00000000	1.71700000	15.31859582	0.447125
21	-0.09991230	8.93598370	-0.89281469		21.00000000	1.63523810	14.61246096	0.468519
22	-0.09014029	8.91519260	-0.80361806		22.00000000	1.56090909	13.91580518	0.489885
23	-0.07995669	8.92687130	-0.71376306		23.00000000	1.49304348	13.32820698	0.511251
24	-0.07014225	8.92562290	-0.62606331		24.00000000	1.43083333	12.77107877	0.532728
25	-0.05999586	8.92215350	-0.53529231		25.00000000	1.37360000	12.25547005	0.554106
26	-0.04984575	8.93097500	-0.44517116		26.00000000	1.32076923	11.79575698	0.575485
27	-0.04005812	8.92541790	-0.35753543		27.00000000	1.27185185	11.35180928	0.596843
28	-0.02987451	8.92620370	-0.26666595		28.00000000	1.22642857	10.94735125	0.618325
29	-0.02004891	8.93505860	-0.17913822		29.00000000	1.18413793	10.58034180	0.639693
30	-0.00993974	8.93494700	-0.08881104		30.00000000	1.14466667	10.22753600	0.661091
31	-0.00066270	8.93139550	-0.00591881		31.00000000	1.10774194	9.89368134	0.682693
32	0.00948944	8.91462040	0.08459476		32.00000000	1.07312500	9.56650202	0.704083
33	0.01932741	8.94102670	0.17280687		33.00000000	1.04060606	9.30408657	0.725441
34	0.02946681	8.92535970	0.26300190		34.00000000	1.01000000	9.01461330	0.746807
35	0.03929064	8.92512230	0.35067374		35.00000000	0.98114286	8.75681999	0.768293
36	0.04942037	8.92430310	0.44104234		36.00000000	0.95388889	8.51279357	0.789674
37	0.05926057	8.92713550	0.52902710		37.00000000	0.92810811	8.28534684	0.811018
38	0.06940146	8.93227200	0.61991270		38.00000000	0.90368421	8.07195317	0.832400
39	0.07956691	8.93356230	0.71081596		39.00000000	0.88051282	7.86611614	0.853883
40	0.08938255	8.93035790	0.79821818		40.00000000	0.85850000	7.66671226	0.875253
41	0.09952866	8.92661480	0.88845396		41.00000000	0.83756098	7.47658420	0.896617
42	0.10932792	8.93168450	0.97648249		42.00000000	0.81761905	7.30271537	0.917998
43	0.11950751	8.94339660	1.06880306		43.00000000	0.79860465	7.14223812	0.939465
44	0.12929711	8.90920540	1.15193451		44.00000000	0.78045455	6.95322985	0.960849
45	0.13946107	8.94486520	1.24746047		45.00000000	0.76311111	6.82592602	0.982200
46	0.14927076	8.92502210	1.33224483		46.00000000	0.74652174	6.66272302	1.003571
47	0.15942727	8.92752080	1.42329027		47.00000000	0.73063830	6.52278860	1.025053
48	0.16956073	8.91920190	1.51234639		48.00000000	0.71541667	6.38094569	1.046426
49	0.17936371	8.92731380	1.60123612		49.00000000	0.70081633	6.25640726	1.067791
50	0.18950610	8.91303350	1.68907422		50.00000000	0.68680000	6.12147141	1.089165
51	0.19932024	8.92928980	1.77978819		51.00000000	0.67333333	6.01238847	1.110645
52	0.20946486	8.92056850	1.86854563		52.00000000	0.66038462	5.89100620	1.132027
53	0.21927528	8.92714500	1.95750222		53.00000000	0.64792453	5.78411621	1.153392
54	0.22941469	8.91799830	2.04591982		54.00000000	0.63592593	5.67118633	1.174756
55	0.23923033	8.93813800	2.13827370		55.00000000	0.62436364	5.58064834	1.196229
56	0.24938685	8.92158790	2.22492670		56.00000000	0.61321429	5.47084515	1.217595
57	0.25953594	8.92985060	2.31761717		57.00000000	0.60245614	5.37984333	1.238985
58	0.26935753	8.93691830	2.40722624		58.00000000	0.59206897	5.29127197	1.260351
59	0.27950734	8.91281800	2.49119805		59.00000000	0.58203390	5.18756221	1.281826
60	0.28934979	8.93315320	2.58480600		60.00000000	0.57233333	5.11274135	1.303213
61	0.29950407	8.92579840	2.67331295		61.00000000	0.56295082	5.02478553	1.324593
62	0.30931300	8.92364220	2.76019854		62.00000000	0.55387097	4.94254634	1.346071
63	0.31944573	8.92829040	2.85210424		63.00000000	0.54507937	4.86662686	1.367470
64	0.32928294	8.92024800	2.93728549		64.00000000	0.53656250	4.78627057	1.388818
65	0.33943945	8.93034460	3.03131126		65.00000000	0.52830769	4.71796975	1.410196
66	0.34924245	8.92110250	3.11562769		66.00000000	0.52030303	4.64167666	1.431670
67	0.35941014	8.93006900	3.20955735		67.00000000	0.51253731	4.57699357	1.453050
68	0.36956516	8.93257240	3.30116755		68.00000000	0.50500000	4.51094906	1.474403
69	0.37938675	8.93342880	3.38922452		69.00000000	0.49768116	4.44599920	1.495780
70	0.38951576	8.92628100	3.47692713		70.00000000	0.49057143	4.37897842	1.517285
71	0.39933959	8.92076680	3.56241536		71.00000000	0.48366197	4.31463566	1.538671
72	0.40949684	8.92488570	3.65471249		72.00000000	0.47694444	4.25667465	1.560044
73	0.41930056	8.91925330	3.73984790		73.00000000	0.47041096	4.19571450	1.581410
74	0.42948762	8.93667410	3.83819089		74.00000000	0.46405405	4.14709985	1.602887
75	0.43930623	8.91702370	3.91730406		75.00000000	0.45786667	4.08280792	1.624258
76	0.44945011	8.90300560	4.00145685		76.00000000	0.45184211	4.02275279	1.645592
77	0.45957312	8.90660480	4.09323616		77.00000000	0.44597403	3.97211440	1.666970
78	0.46943194	8.89097310	4.17370675		78.00000000	0.44025641	3.91430790	1.688447
79	0.47956687	8.90015790	4.26822087		79.00000000	0.43468354	3.86875218	1.709822
80	0.48941302	8.87500190	4.34354148		80.00000000	0.42925000	3.80959457	1.731183
81	0.49950999	8.88473990	4.43801634		81.00000000	0.42395062	3.76669097	1.752558
82	0.50933683	8.85010810	4.50768600		82.00000000	0.41878049	3.70625259	1.774037
83	0.51948142	8.78763770	4.56501451		83.00000000	0.41373494	3.63575275	1.795419
84	0.52925909	8.75206280	4.63210879		84.00000000	0.40880952	3.57792663	1.816782
85	0.53938508	8.67111400	4.67706952		85.00000000	0.40400000	3.50313006	1.838144
86	0.54953790	8.55819420	4.70305207		86.00000000	0.39930233	3.41730685	1.859625
87	0.55932450	8.39966490	4.69813837		87.00000000	0.39471264	3.31545394	1.881004
88	0.56946093	8.18793960	4.66271170		88.00000000	0.39022727	3.19515734	1.902388
89	0.57928997	7.89688400	4.57458570		89.00000000	0.38584270	3.04695502	1.923727
90	0.58940929	7.49171730	4.41568777		90.00000000	0.38155556	2.85850636	1.945205
91	0.59921378	6.97189280	4.17765424		91.00000000	0.37736264	2.63093185	1.966587
92	0.60930926	6.29151540	3.83347859		92.00000000	0.37326087	2.34837651	1.988072
93	0.61908692	5.46349950	3.38238108		93.00000000	0.36924731	2.01738250	2.009609
94	0.62925613	4.40818120	2.77387504		94.00000000	0.36531915	1.61039300	2.031006
95	0.63936353	3.11684060	1.99279421		95.00000000	0.36147368	1.12665585	2.052371
96	0.64913303	1.62307510	1.05359166		96.00000000	0.35770833	0.58058749	2.073749
97	0.65920693	-0.16249295	-0.10711648		97.00000000	0.35402062	-0.05752585	2.095238
98	0.66894811	-2.21026020	-1.47854938		98.00000000	0.35040816	-0.77449322	2.116607
99	0.67902875	-4.63234660	-3.14549652		99.00000000	0.34686869	-1.60681598	2.137948
100	0.68889272	-7.39913890	-5.09721292		100.00000000	0.34340000	-2.54086430	2.159336
101	0.69712901	-9.99393840	-6.96706438		101.00000000	0.34000000	-3.39793906	2.180811
