# Supplementary material for: Study on the Electrical Injection Regeneration of Industrialized B-Doped Czochralski Silicon PERC Solar Cells
Source: Hindawi journal article supplement (doi:10.1155/2019/5357370), 2019-06-20
Supplement: f1 [file 5357370.f1.zip › section3.2/IVRawData_1-10.csv]

11:21 02/04/2018
Test Lot:	JK-PERC
Recipe:	Recipe_YJX-LID
Cell Name:	1-10
Test Order:	2
Test Condition:	Light
1	-0.29988053	9.01799490	-2.70432109		1.00000000	34.34000000	309.67794487	0.000000
2	-0.29006371	9.01172540	-2.61397450		2.00000000	17.17000000	154.73132512	0.061835
3	-0.27995291	9.02897450	-2.52768769		3.00000000	11.44666667	103.35166144	0.083256
4	-0.27013835	9.00754170	-2.43328245		4.00000000	8.58500000	77.32974549	0.104742
5	-0.25997394	9.03053280	-2.34770319		5.00000000	6.86800000	62.02169927	0.126181
6	-0.24980435	9.02075200	-2.25342309		6.00000000	5.72333333	51.62877061	0.147544
7	-0.23998010	9.02223870	-2.16515775		7.00000000	4.90571429	44.26052528	0.168930
8	-0.22984993	9.02213570	-2.07373726		8.00000000	4.29250000	38.72751749	0.190412
9	-0.22000411	9.01774120	-1.98394013		9.00000000	3.81555556	34.40769253	0.211777
10	-0.20989703	9.01612280	-1.89245740		10.00000000	3.43400000	30.96136570	0.233144
11	-0.20005418	9.02147290	-1.80478336		11.00000000	3.12181818	28.16339813	0.254516
12	-0.18990541	9.01461410	-1.71192399		12.00000000	2.86166667	25.79682068	0.276002
13	-0.18011764	9.02621750	-1.62578099		13.00000000	2.64153846	23.84310069	0.297375
14	-0.16999269	9.01334570	-1.53220288		14.00000000	2.45285714	22.10844938	0.318816
15	-0.16015579	9.02213190	-1.44494666		15.00000000	2.28933333	20.65466730	0.340175
16	-0.14999288	9.01503280	-1.35219073		16.00000000	2.14625000	19.34851415	0.361664
17	-0.13986495	9.02031140	-1.26162540		17.00000000	2.02000000	18.22102903	0.383049
18	-0.13005337	9.02458190	-1.17367729		18.00000000	1.90777778	17.21689680	0.404427
19	-0.11987408	9.02070710	-1.08134896		19.00000000	1.80736842	16.30374115	0.425860
20	-0.11005580	9.00296400	-0.99082841		20.00000000	1.71700000	15.45808919	0.447329
21	-0.09989438	9.02888770	-0.90193509		21.00000000	1.63523810	14.76438112	0.468701
22	-0.09006716	9.01031880	-0.81153379		22.00000000	1.56090909	14.06428853	0.490110
23	-0.07992806	9.02272800	-0.72116917		23.00000000	1.49304348	13.47132520	0.511454
24	-0.07011499	9.00102810	-0.63110695		24.00000000	1.43083333	12.87897104	0.532937
25	-0.05994240	9.03410240	-0.54152576		25.00000000	1.37360000	12.40924306	0.554314
26	-0.04979587	9.01189230	-0.44875498		26.00000000	1.32076923	11.90263006	0.575690
27	-0.03994855	9.03361700	-0.36087989		27.00000000	1.27185185	11.48942251	0.597060
28	-0.02986305	9.00515170	-0.26892130		28.00000000	1.22642857	11.04417533	0.618533
29	-0.02003136	9.01762770	-0.18063537		29.00000000	1.18413793	10.67811501	0.639898
30	-0.00990120	9.01501460	-0.08925950		30.00000000	1.14466667	10.31918671	0.661300
31	-0.00067762	9.01353070	-0.00610778		31.00000000	1.10774194	9.98466594	0.682764
32	0.00951113	9.01603130	0.08575262		32.00000000	1.07312500	9.67532859	0.704244
33	0.01928448	9.00635150	0.17368280		33.00000000	1.04060606	9.37206395	0.725634
34	0.02947613	9.02156640	0.26592082		34.00000000	1.01000000	9.11178206	0.747009
35	0.03928446	9.01871970	0.35429553		35.00000000	0.98114286	8.84865241	0.768483
36	0.04937860	9.01929000	0.44535995		36.00000000	0.95388889	8.60340052	0.789868
37	0.05921820	9.01249980	0.53370400		37.00000000	0.92810811	8.36457414	0.811213
38	0.06937411	9.03291800	0.62665068		38.00000000	0.90368421	8.16290537	0.832638
39	0.07950324	9.00327110	0.71578921		39.00000000	0.88051282	7.92749563	0.854122
40	0.08929744	9.01477620	0.80499640		40.00000000	0.85850000	7.73918537	0.875513
41	0.09947792	9.01015660	0.89631161		41.00000000	0.83756098	7.54655555	0.896873
42	0.10928997	9.01421830	0.98516365		42.00000000	0.81761905	7.37019658	0.918249
43	0.11942803	9.01231960	1.07632358		43.00000000	0.79860465	7.19728035	0.939735
44	0.12929145	9.02693650	1.16710571		44.00000000	0.78045455	7.04511362	0.961123
45	0.13941237	9.00795560	1.25582044		45.00000000	0.76311111	6.87407101	0.982483
46	0.14923263	9.01772790	1.34573925		46.00000000	0.74652174	6.73192991	1.003852
47	0.15940937	9.01573090	1.43719198		47.00000000	0.73063830	6.58723828	1.025341
48	0.16951692	9.02655790	1.53015429		48.00000000	0.71541667	6.45774996	1.046724
49	0.17935130	9.02088550	1.61790754		49.00000000	0.70081633	6.32198384	1.068070
50	0.18952063	9.01714710	1.70893540		50.00000000	0.68680000	6.19297663	1.089449
51	0.19927610	9.02985860	1.79943501		51.00000000	0.67333333	6.08010479	1.110924
52	0.20945436	8.99659250	1.88437552		52.00000000	0.66038462	5.94121128	1.132303
53	0.21926790	9.01955890	1.97769974		53.00000000	0.64792453	5.84399345	1.153660
54	0.22939703	9.01814370	2.06873538		54.00000000	0.63592593	5.73487138	1.175035
55	0.23923290	9.01251510	2.15609012		55.00000000	0.62436364	5.62708670	1.196505
56	0.24936351	9.00896170	2.24650631		56.00000000	0.61321429	5.52442401	1.217882
57	0.25955740	9.01295380	2.33937885		57.00000000	0.60245614	5.42990936	1.239240
58	0.26935679	9.01279540	2.42765764		58.00000000	0.59206897	5.33619645	1.260650
59	0.27952462	9.01957040	2.52119199		59.00000000	0.58203390	5.24969572	1.282125
60	0.28930318	9.02286150	2.61034252		60.00000000	0.57233333	5.16408440	1.303506
61	0.29944944	9.00113200	2.69538394		61.00000000	0.56295082	5.06719464	1.324899
62	0.30929273	9.01916500	2.78956217		62.00000000	0.55387097	4.99545365	1.346240
63	0.31945312	9.00154400	2.87557132		63.00000000	0.54507937	4.90655589	1.367711
64	0.32926741	9.02167800	2.97054455		64.00000000	0.53656250	4.84069410	1.389102
65	0.33941963	9.00421050	3.05620580		65.00000000	0.52830769	4.75699367	1.410486
66	0.34924507	9.02675820	3.15255080		66.00000000	0.52030303	4.69664965	1.432026
67	0.35937047	9.00218490	3.23511942		67.00000000	0.51253731	4.61395566	1.453410
68	0.36951226	9.02838520	3.33609902		68.00000000	0.50500000	4.55933453	1.474767
69	0.37933397	9.00470640	3.41579103		69.00000000	0.49768116	4.48147272	1.496140
70	0.38949510	9.00451090	3.50721287		70.00000000	0.49057143	4.41735578	1.517626
71	0.39932951	9.02090070	3.60231186		71.00000000	0.48366197	4.36306662	1.538999
72	0.40946755	9.01865770	3.69284767		72.00000000	0.47694444	4.30139869	1.560354
73	0.41927886	9.01194380	3.77851752		73.00000000	0.47041096	4.23931712	1.581739
74	0.42944446	9.01799680	3.87272877		74.00000000	0.46405405	4.18483797	1.603207
75	0.43923122	9.00766660	3.95644839		75.00000000	0.45786667	4.12431028	1.624614
76	0.44940796	9.00022700	4.04477366		76.00000000	0.45184211	4.06668152	1.645964
77	0.45954305	9.00336460	4.13743363		77.00000000	0.44597403	4.01526676	1.667342
78	0.46940348	9.00399400	4.22650612		78.00000000	0.44025641	3.96406608	1.688828
79	0.47954527	9.00531860	4.31845794		79.00000000	0.43468354	3.91446381	1.710200
80	0.48934689	8.96917720	4.38903897		80.00000000	0.42925000	3.85001931	1.731544
81	0.49948645	8.98923300	4.49000008		81.00000000	0.42395062	3.81099088	1.752925
82	0.50934094	8.95573620	4.56152309		82.00000000	0.41878049	3.75048757	1.774401
83	0.51944995	8.92563530	4.63642081		83.00000000	0.41373494	3.69284718	1.795799
84	0.52923894	8.89182660	4.70590088		84.00000000	0.40880952	3.63506340	1.817139
85	0.53938073	8.85031800	4.77369098		85.00000000	0.40400000	3.57552847	1.838502
86	0.54954928	8.77386280	4.82166998		86.00000000	0.39930233	3.50342382	1.859978
87	0.55937248	8.66227150	4.84543629		87.00000000	0.39471264	3.41910808	1.881359
88	0.56946963	8.51550290	4.84932029		88.00000000	0.39022727	3.32298147	1.902725
89	0.57930177	8.31964300	4.81958392		89.00000000	0.38584270	3.21007349	1.924096
90	0.58938700	8.02641870	4.73066684		90.00000000	0.38155556	3.06252465	1.945572
91	0.59920949	7.64256240	4.57949592		91.00000000	0.37736264	2.88401750	1.966950
92	0.60933411	7.12769700	4.34314891		92.00000000	0.37326087	2.66049038	1.988431
93	0.61914021	6.45208930	3.99474792		93.00000000	0.36924731	2.38241663	2.009806
94	0.62924701	5.56254960	3.50021770		94.00000000	0.36531915	2.03210589	2.031300
95	0.63937020	4.43500280	2.83560863		95.00000000	0.36147368	1.60313680	2.052684
96	0.64914429	3.06501580	1.98963751		96.00000000	0.35770833	1.09638169	2.074077
97	0.65921980	1.31893690	0.86946932		97.00000000	0.35402062	0.46693086	2.095563
98	0.66896343	-0.72063911	-0.48208121		98.00000000	0.35040816	-0.25251783	2.116949
99	0.67903376	-3.23042610	-2.19356838		99.00000000	0.34686869	-1.12053366	2.138354
100	0.68875498	-6.14080330	-4.22950885		100.00000000	0.34340000	-2.10875185	2.159756
101	0.69911259	-9.68243980	-6.76911557		101.00000000	0.34000000	-3.29202953	2.181250
11:21 02/04/2018
Test Lot:	JK-PERC
Recipe:	Recipe_YJX-LID
Cell Name:	1-10
Test Order:	3
Test Condition:	Light
1	-0.29992443	9.02372460	-2.70643546		1.00000000	34.34000000	309.87470276	0.000000
2	-0.29003394	9.01237110	-2.61389350		2.00000000	17.17000000	154.74241179	0.021591
3	-0.27993059	9.00637820	-2.52116076		3.00000000	11.44666667	103.09300913	0.042977
4	-0.27011827	9.00953100	-2.43363893		4.00000000	8.58500000	77.34682364	0.064333
5	-0.25996798	9.01090430	-2.34254659		5.00000000	6.86800000	61.88689073	0.085723
6	-0.24981551	9.01260660	-2.25148891		6.00000000	5.72333333	51.58215177	0.107208
7	-0.24001805	9.02292160	-2.16566405		7.00000000	4.90571429	44.26387539	0.128585
8	-0.22985962	9.00569060	-2.07004462		8.00000000	4.29250000	38.65692690	0.149930
9	-0.22002941	9.00824260	-1.98207830		9.00000000	3.81555556	34.37145010	0.171365
10	-0.20987619	9.01807210	-1.89267861		10.00000000	3.43400000	30.96805959	0.192848
11	-0.20005344	9.00621320	-1.80172393		11.00000000	3.12181818	28.11576012	0.214228
12	-0.18991509	9.00151350	-1.70952325		12.00000000	2.86166667	25.75933113	0.235571
13	-0.18014145	9.01436900	-1.62386150		13.00000000	2.64153846	23.81180242	0.256962
14	-0.16997409	9.00139240	-1.53000348		14.00000000	2.45285714	22.07912964	0.278441
15	-0.16016249	9.01284030	-1.44351894		15.00000000	2.28933333	20.63339573	0.299808
16	-0.15002936	9.00364690	-1.35081138		16.00000000	2.14625000	19.32407716	0.321182
17	-0.13985007	9.00978280	-1.26001876		17.00000000	2.02000000	18.19976126	0.342549
18	-0.13003178	9.00598810	-1.17106466		18.00000000	1.90777778	17.18142396	0.364025
19	-0.11989641	9.01256850	-1.08057461		19.00000000	1.80736842	16.28903170	0.385409
20	-0.11007068	9.01939390	-0.99277082		20.00000000	1.71700000	15.48629933	0.406796
21	-0.09989810	9.01001830	-0.90008371		21.00000000	1.63523810	14.73352516	0.428197
22	-0.09012596	9.00232510	-0.81134316		22.00000000	1.56090909	14.05181109	0.449679
23	-0.07998389	9.01270680	-0.72087135		23.00000000	1.49304348	13.45636311	0.471054
24	-0.07012317	9.01301190	-0.63202099		24.00000000	1.43083333	12.89611786	0.492435
25	-0.05995654	9.01002790	-0.54021013		25.00000000	1.37360000	12.37617432	0.513910
26	-0.04981150	9.00642010	-0.44862327		26.00000000	1.32076923	11.89540255	0.535369
27	-0.03999395	9.01298710	-0.36046498		27.00000000	1.27185185	11.46318433	0.556763
28	-0.02985263	9.00778200	-0.26890597		28.00000000	1.22642857	11.04740121	0.578144
29	-0.02001573	9.01508140	-0.18044344		29.00000000	1.18413793	10.67509984	0.599547
30	-0.00988855	9.00206090	-0.08901733		30.00000000	1.14466667	10.30435904	0.621042
31	-0.00067539	9.00578590	-0.00608243		31.00000000	1.10774194	9.97608670	0.642541
32	0.00950368	9.01352120	0.08566166		32.00000000	1.07312500	9.67263494	0.663935
33	0.01931574	8.99103550	0.17366850		33.00000000	1.04060606	9.35612603	0.685300
34	0.02947315	9.02028850	0.26585630		34.00000000	1.01000000	9.11049139	0.706773
35	0.03925617	9.00787540	0.35361472		35.00000000	0.98114286	8.83801261	0.728144
36	0.04942549	9.00525190	0.44508902		36.00000000	0.95388889	8.59000973	0.749526
37	0.05922341	9.01233480	0.53374116		37.00000000	0.92810811	8.36442100	0.770921
38	0.06938454	9.01354600	0.62540072		38.00000000	0.90368421	8.14539920	0.792398
39	0.07950473	9.00814060	0.71618977		39.00000000	0.88051282	7.93178329	0.813771
40	0.08934507	9.02163310	0.80603842		40.00000000	0.85850000	7.74507202	0.835149
41	0.09945857	9.01606460	0.89672487		41.00000000	0.83756098	7.55150386	0.856635
42	0.10928774	9.00750160	0.98440949		42.00000000	0.81761905	7.36470488	0.878007
43	0.11943324	9.01714900	1.07694732		43.00000000	0.79860465	7.20113713	0.899364
44	0.12924753	8.99631690	1.16275174		44.00000000	0.78045455	7.02121642	0.920747
45	0.13943620	9.01189040	1.25658375		45.00000000	0.76311111	6.87707370	0.942232
46	0.14923114	9.00889020	1.34440695		46.00000000	0.74652174	6.72533238	0.963609
47	0.15941608	9.00960060	1.43627521		47.00000000	0.73063830	6.58275925	0.984969
48	0.16953553	9.01319890	1.52805745		48.00000000	0.71541667	6.44819271	1.006344
49	0.17937513	9.01291560	1.61669291		49.00000000	0.70081633	6.31639840	1.027813
50	0.18947448	9.00087450	1.70543602		50.00000000	0.68680000	6.18180061	1.049193
51	0.19927463	9.01132680	1.79572881		51.00000000	0.67333333	6.06762671	1.070539
52	0.20939854	9.00636010	1.88591866		52.00000000	0.66038462	5.94766165	1.091908
53	0.21926120	9.00044440	1.97344824		53.00000000	0.64792453	5.83160869	1.113395
54	0.22941490	9.00970460	2.06696048		54.00000000	0.63592593	5.72950474	1.134768
55	0.23920909	8.99736500	2.15225149		55.00000000	0.62436364	5.61762753	1.156144
56	0.24937245	9.01600460	2.24834316		56.00000000	0.61321429	5.52874282	1.177518
57	0.25951794	9.00909520	2.33802183		57.00000000	0.60245614	5.42758472	1.198993
58	0.26937467	9.01093100	2.42731656		58.00000000	0.59206897	5.33509260	1.220388
59	0.27950603	9.01836590	2.52068765		59.00000000	0.58203390	5.24899466	1.241729
60	0.28935009	9.01579760	2.60872185		60.00000000	0.57233333	5.16004149	1.263106
61	0.29949260	9.00308420	2.69635710		61.00000000	0.56295082	5.06829363	1.284596
62	0.30925852	9.01371290	2.78756751		62.00000000	0.55387097	4.99243389	1.305966
63	0.31944570	9.00642870	2.87706492		63.00000000	0.54507937	4.90921844	1.327370
64	0.32924882	9.00991440	2.96650368		64.00000000	0.53656250	4.83438220	1.348730
65	0.33939877	9.00141910	3.05507057		65.00000000	0.52830769	4.75551895	1.370214
66	0.34923986	8.99791720	3.14243134		66.00000000	0.52030303	4.68164359	1.391603
67	0.35936674	9.00925540	3.23762674		67.00000000	0.51253731	4.61757956	1.412998
68	0.36954278	8.98963360	3.32205419		68.00000000	0.50500000	4.53976497	1.434339
69	0.37936971	8.99569800	3.41269534		69.00000000	0.49768116	4.47698941	1.455815
70	0.38951969	9.01472280	3.51141203		70.00000000	0.49057143	4.42236544	1.477189
71	0.39930642	9.00291730	3.59492268		71.00000000	0.48366197	4.35436873	1.498568
72	0.40949285	9.01581100	3.69191014		72.00000000	0.47694444	4.30004097	1.520034
73	0.41929153	8.99862000	3.77304515		73.00000000	0.47041096	4.23304946	1.541408
74	0.42942959	9.01021860	3.86925448		74.00000000	0.46405405	4.18122847	1.562759
75	0.43924090	8.98993590	3.94874754		75.00000000	0.45786667	4.11619198	1.584142
76	0.44937968	8.99905400	4.04399201		76.00000000	0.45184211	4.06615150	1.605627
77	0.45952520	8.99380590	4.13288045		77.00000000	0.44597403	4.01100383	1.627009
78	0.46939382	8.98392110	4.21699704		78.00000000	0.44025641	3.95522885	1.648379
79	0.47953707	8.98079200	4.30662268		79.00000000	0.43468354	3.90380250	1.669762
80	0.48937592	8.97735120	4.39329950		80.00000000	0.42925000	3.85352800	1.691239
81	0.49949762	8.97334580	4.48216487		81.00000000	0.42395062	3.80425549	1.712609
82	0.50930518	8.94905090	4.55779798		82.00000000	0.41878049	3.74768790	1.733945
83	0.51944923	8.91559790	4.63120046		83.00000000	0.41373494	3.68869436	1.755330
84	0.52924860	8.89226910	4.70622097		84.00000000	0.40880952	3.63524430	1.776809
85	0.53935689	8.83145900	4.76330826		85.00000000	0.40400000	3.56790944	1.798183
86	0.54950237	8.75551890	4.81117839		86.00000000	0.39930233	3.49609906	1.819535
87	0.55936801	8.64741230	4.83708581		87.00000000	0.39471264	3.41324297	1.840902
88	0.56947631	8.49948600	4.84025592		88.00000000	0.39022727	3.31673124	1.862381
89	0.57926756	8.28235820	4.79770143		89.00000000	0.38584270	3.19568742	1.883766
90	0.58943093	7.99943540	4.71511465		90.00000000	0.38155556	3.05222902	1.905123
91	0.59925115	7.60364630	4.55649379		91.00000000	0.37736264	2.86933202	1.926506
92	0.60935497	7.07144690	4.30902131		92.00000000	0.37326087	2.63949442	1.947999
93	0.61913204	6.40849300	3.96770334		93.00000000	0.36924731	2.36631881	1.969382
94	0.62924999	5.50054930	3.46122059		94.00000000	0.36531915	2.00945599	1.990863
95	0.63933742	4.36469700	2.79051412		95.00000000	0.36147368	1.57772311	2.012255
96	0.64910036	3.00057650	1.94767529		96.00000000	0.35770833	1.07333122	2.033735
97	0.65924215	1.27183810	0.83844928		97.00000000	0.35402062	0.45025691	2.055134
98	0.66896564	-0.75047219	-0.50204011		98.00000000	0.35040816	-0.26297158	2.076525
99	0.67905086	-3.21456150	-2.18285075		99.00000000	0.34686869	-1.11503073	2.097880
100	0.68879223	-6.05683180	-4.17189868		100.00000000	0.34340000	-2.07991604	2.119351
101	0.69910216	-9.48436550	-6.63054041		101.00000000	0.34000000	-3.22468427	2.140723
11:21 02/04/2018
Test Lot:	JK-PERC
Recipe:	Recipe_YJX-LID
Cell Name:	1-10
Test Order:	4
Test Condition:	Light
1	-0.29989111	9.00817300	-2.70147100		1.00000000	34.34000000	309.34066082	0.000000
2	-0.29005718	9.00701810	-2.61255027		2.00000000	17.17000000	154.65050078	0.061832
3	-0.27989650	9.00396920	-2.52017947		3.00000000	11.44666667	103.06543411	0.083264
4	-0.27009979	9.00128080	-2.43124405		4.00000000	8.58500000	77.27599567	0.104762
5	-0.25994432	9.02059940	-2.34485358		5.00000000	6.86800000	61.95347668	0.126144
6	-0.24979779	9.00805950	-2.25019336		6.00000000	5.72333333	51.55612721	0.147491
7	-0.23996684	9.01119520	-2.16238804		7.00000000	4.90571429	44.20634902	0.168872
8	-0.22982179	9.01324270	-2.07143957		8.00000000	4.29250000	38.68934429	0.190358
9	-0.21998563	9.01243690	-1.98260661		9.00000000	3.81555556	34.38745368	0.211741
10	-0.20984429	9.01944920	-1.89267991		10.00000000	3.43400000	30.97278855	0.233184
11	-0.20003195	9.00557800	-1.80140333		11.00000000	3.12181818	28.11377714	0.254543
12	-0.18989435	9.00929930	-1.71081503		12.00000000	2.86166667	25.78161150	0.276016
13	-0.18011625	9.01018430	-1.62288061		13.00000000	2.64153846	23.80074837	0.297398
14	-0.16996822	9.01182270	-1.53172346		14.00000000	2.45285714	22.10471368	0.318787
15	-0.16014546	9.01699920	-1.44403148		15.00000000	2.28933333	20.64291684	0.340261
16	-0.15000711	9.01026730	-1.35160416		16.00000000	2.14625000	19.33828619	0.361709
17	-0.13986950	9.01750370	-1.26127373		17.00000000	2.02000000	18.21535747	0.383072
18	-0.13001846	8.99958990	-1.17011282		18.00000000	1.90777778	17.16921762	0.404465
19	-0.11989722	9.00865170	-1.08011229		19.00000000	1.80736842	16.28195260	0.425816
20	-0.11007149	9.00446990	-0.99113542		20.00000000	1.71700000	15.46067482	0.447317
21	-0.09990411	9.00711350	-0.89984761		21.00000000	1.63523810	14.72877512	0.468713
22	-0.09008060	9.01091290	-0.81170848		22.00000000	1.56090909	14.06521586	0.490112
23	-0.07995863	8.99813840	-0.71947877		23.00000000	1.49304348	13.43461185	0.511474
24	-0.07014033	9.02184770	-0.63279539		24.00000000	1.43083333	12.90876042	0.532947
25	-0.05996849	8.99709030	-0.53954188		25.00000000	1.37360000	12.35840324	0.554336
26	-0.04981227	9.02292540	-0.44945238		26.00000000	1.32076923	11.91720224	0.575728
27	-0.04002821	9.00947000	-0.36063299		27.00000000	1.27185185	11.45871110	0.597070
28	-0.02985711	9.00500200	-0.26886335		28.00000000	1.22642857	11.04399174	0.618549
29	-0.02002095	9.00663090	-0.18032134		29.00000000	1.18413793	10.66509328	0.639936
30	-0.00987814	9.00743680	-0.08897670		30.00000000	1.14466667	10.31051266	0.661316
31	-0.00065827	9.01396750	-0.00593365		31.00000000	1.10774194	9.98514980	0.682910
32	0.00947987	8.98396300	0.08516681		32.00000000	1.07312500	9.64091529	0.704296
33	0.01928300	9.01082800	0.17375580		33.00000000	1.04060606	9.37672223	0.725642
34	0.02945753	9.01046090	0.26542596		34.00000000	1.01000000	9.10056551	0.747008
35	0.03928225	8.99916170	0.35350729		35.00000000	0.98114286	8.82946322	0.768493
36	0.04942999	9.00192830	0.44496520		36.00000000	0.95388889	8.58683938	0.789882
37	0.05923386	9.00395580	0.53333905		37.00000000	0.92810811	8.35664438	0.811233
38	0.06940318	9.00684830	0.62510390		38.00000000	0.90368421	8.13934660	0.832624
39	0.07955539	9.00576500	0.71645710		39.00000000	0.88051282	7.92969154	0.854106
40	0.08936819	9.01063630	0.80526423		40.00000000	0.85850000	7.73563126	0.875494
41	0.09950700	9.00708480	0.89626796		41.00000000	0.83756098	7.54398273	0.896848
42	0.10932799	9.01002880	0.98504834		42.00000000	0.81761905	7.36677117	0.918220
43	0.11946903	8.99921510	1.07512750		43.00000000	0.79860465	7.18681504	0.939694
44	0.12932277	9.01090620	1.16531535		44.00000000	0.78045455	7.03260270	0.961074
45	0.13941319	9.01843640	1.25728899		45.00000000	0.76311111	6.88206902	0.982412
46	0.14924535	9.00133230	1.34340699		46.00000000	0.74652174	6.71969024	1.003790
47	0.15940352	9.00941470	1.43613242		47.00000000	0.73063830	6.58262342	1.025259
48	0.16953190	9.00173280	1.52608086		48.00000000	0.71541667	6.43998967	1.046641
49	0.17937373	9.01235200	1.61657919		49.00000000	0.70081633	6.31600342	1.068003
50	0.18951403	9.00460150	1.70649832		50.00000000	0.68680000	6.18436031	1.089383
51	0.19930302	9.01073840	1.79586738		51.00000000	0.67333333	6.06723052	1.110868
52	0.20943512	9.00146290	1.88522246		52.00000000	0.66038462	5.94442762	1.132253
53	0.21927026	9.00808620	1.97520540		53.00000000	0.64792453	5.83656000	1.153619
54	0.22939789	9.00359730	2.06540622		54.00000000	0.63592593	5.72562095	1.174992
55	0.23923080	8.99798300	2.15259467		55.00000000	0.62436364	5.61801339	1.196473
56	0.24936439	9.00996020	2.24676323		56.00000000	0.61321429	5.52503631	1.217855
57	0.25951138	8.98856070	2.33263379		57.00000000	0.60245614	5.41521359	1.239243
58	0.26934430	9.02029230	2.42956432		58.00000000	0.59206897	5.34063513	1.260594
59	0.27948087	8.99371910	2.51357244		59.00000000	0.58203390	5.23464939	1.282069
60	0.28932866	9.01848510	2.60930621		60.00000000	0.57233333	5.16157964	1.303482
61	0.29944289	8.99986360	2.69494517		61.00000000	0.56295082	5.06648059	1.324864
62	0.30929738	9.01419930	2.78806823		62.00000000	0.55387097	4.99270329	1.346339
63	0.31943396	9.01776890	2.88058163		63.00000000	0.54507937	4.91539975	1.367719
64	0.32924601	8.99746610	2.96237981		64.00000000	0.53656250	4.82770290	1.389061
65	0.33942205	9.00481220	3.05643182		65.00000000	0.52830769	4.75731155	1.410450
66	0.34922516	9.01014420	3.14656905		66.00000000	0.52030303	4.68800533	1.431934
67	0.35940865	9.00577830	3.23675462		67.00000000	0.51253731	4.61579742	1.453312
68	0.36952361	8.99975010	3.32562015		68.00000000	0.50500000	4.54487380	1.474658
69	0.37936917	8.99703030	3.41319592		69.00000000	0.49768116	4.47765247	1.496038
70	0.38950947	9.00649930	3.50811677		70.00000000	0.49057143	4.41833123	1.517520
71	0.39934683	8.99619770	3.59260303		71.00000000	0.48366197	4.35111872	1.538910
72	0.40947747	9.00196840	3.68610325		72.00000000	0.47694444	4.29343882	1.560257
73	0.41928357	8.99375920	3.77093547		73.00000000	0.47041096	4.23076289	1.581631
74	0.42942014	8.99672990	3.86337701		74.00000000	0.46405405	4.17496898	1.603101
75	0.43926421	8.99298000	3.95029426		75.00000000	0.45786667	4.11758578	1.624473
76	0.44942608	8.98852920	4.03967944		76.00000000	0.45184211	4.06139596	1.645811
77	0.45954406	8.99178310	4.13212051		77.00000000	0.44597403	4.01010171	1.667191
78	0.46939406	8.99396800	4.22171516		78.00000000	0.44025641	3.95965207	1.688672
79	0.47955224	8.98287680	4.30775869		79.00000000	0.43468354	3.90470873	1.710049
80	0.48939034	8.97025870	4.38995796		80.00000000	0.42925000	3.85048355	1.731409
81	0.49949864	8.94727900	4.46915369		81.00000000	0.42395062	3.79320446	1.752784
82	0.50932556	8.94684700	4.55685786		82.00000000	0.41878049	3.74676495	1.774249
83	0.51947927	8.91931440	4.63339893		83.00000000	0.41373494	3.69023201	1.795645
84	0.52923328	8.87644390	4.69770952		84.00000000	0.40880952	3.62877480	1.817012
85	0.53938550	8.83366200	4.76474919		85.00000000	0.40400000	3.56879945	1.838384
86	0.54952133	8.74184320	4.80382930		86.00000000	0.39930233	3.49063832	1.859870
87	0.55936909	8.63997460	4.83293473		87.00000000	0.39471264	3.41030722	1.881250
88	0.56949526	8.48509600	4.83222195		88.00000000	0.39022727	3.31111587	1.902652
89	0.57929391	8.26905920	4.79021564		89.00000000	0.38584270	3.19055610	1.924002
90	0.58940518	7.98609210	4.70704405		90.00000000	0.38155556	3.04713781	1.945489
91	0.59921056	7.57638070	4.53984732		91.00000000	0.37736264	2.85904300	1.966882
92	0.60932553	7.06329630	4.30384676		92.00000000	0.37326087	2.63645212	1.988347
93	0.61911821	6.37104080	3.94442738		93.00000000	0.36924731	2.35248969	2.009857
94	0.62925184	5.47207450	3.44331295		94.00000000	0.36531915	1.99905360	2.031250
95	0.63935268	4.34115740	2.77553062		95.00000000	0.36147368	1.56921416	2.052672
96	0.64915955	2.97017930	1.92812026		96.00000000	0.35770833	1.06245789	2.074067
97	0.65923953	1.22981880	0.81074517		97.00000000	0.35402062	0.43538121	2.095566
98	0.66898459	-0.77651489	-0.51947650		98.00000000	0.35040816	-0.27209716	2.116940
99	0.67904824	-3.24408700	-2.20289157		99.00000000	0.34686869	-1.12527220	2.138294
100	0.68879181	-6.08199740	-4.18923000		100.00000000	0.34340000	-2.08855791	2.159671
101	0.69910109	-9.50535580	-6.64520460		101.00000000	0.34000000	-3.23182097	2.181150
