# Supplementary material for: Study on the Electrical Injection Regeneration of Industrialized B-Doped Czochralski Silicon PERC Solar Cells
Source: Hindawi journal article supplement (doi:10.1155/2019/5357370), 2019-06-20
Supplement: f1 [file 5357370.f1.zip › section3.2/IVRawData_1-20-1.5h.csv]

15:09 02/04/2018
Test Lot:	JK-PERC
Recipe:	Recipe_YJX-LID
Cell Name:	1-20-1.5h
Test Order:	2
Test Condition:	Light
1	-0.29987678	9.00947570	-2.70173256		1.00000000	34.34000000	309.38539554	0.000000
2	-0.29011112	8.98312570	-2.60610466		2.00000000	17.17000000	154.24026827	0.061808
3	-0.27993983	8.99765490	-2.51880198		3.00000000	11.44666667	102.99315642	0.083252
4	-0.27010345	8.98433210	-2.42669910		4.00000000	8.58500000	77.13049108	0.104747
5	-0.25997236	8.99693200	-2.33895364		5.00000000	6.86800000	61.79092898	0.126136
6	-0.24977578	8.98614790	-2.24452210		6.00000000	5.72333333	51.43071981	0.147494
7	-0.23997886	9.00384330	-2.16073205		7.00000000	4.90571429	44.17028270	0.168867
8	-0.22985744	8.99546050	-2.06767352		8.00000000	4.29250000	38.61301420	0.190340
9	-0.22000545	9.00717450	-1.98162748		9.00000000	3.81555556	34.36737470	0.211704
10	-0.20984085	8.99756810	-1.88805734		10.00000000	3.43400000	30.89764886	0.233044
11	-0.20002012	9.00122450	-1.80042600		11.00000000	3.12181818	28.10018630	0.254415
12	-0.18987489	8.99582100	-1.70808052		12.00000000	2.86166667	25.74304110	0.275895
13	-0.18010029	8.99460600	-1.61993115		13.00000000	2.64153846	23.75959770	0.297273
14	-0.16995357	8.99335100	-1.52845211		14.00000000	2.45285714	22.05940524	0.318638
15	-0.16014400	8.99324700	-1.44021455		15.00000000	2.28933333	20.58854013	0.340015
16	-0.14998165	8.98996830	-1.34833028		16.00000000	2.14625000	19.29471946	0.361497
17	-0.13983640	9.00290010	-1.25893314		17.00000000	2.02000000	18.18585820	0.382877
18	-0.13004842	8.99362280	-1.16960644		18.00000000	1.90777778	17.15783372	0.404241
19	-0.11989202	9.00309370	-1.07939909		19.00000000	1.80736842	16.27190725	0.425606
20	-0.11007351	8.99136640	-0.98971126		20.00000000	1.71700000	15.43817611	0.447090
21	-0.09992679	8.99532030	-0.89887350		21.00000000	1.63523810	14.70949043	0.468460
22	-0.09012243	8.99651340	-0.81078767		22.00000000	1.56090909	14.04273955	0.489846
23	-0.07994817	9.00426390	-0.71987438		23.00000000	1.49304348	13.44375749	0.511189
24	-0.07012744	8.99539380	-0.63082389		24.00000000	1.43083333	12.87090930	0.532657
25	-0.05998517	9.00128940	-0.53994389		25.00000000	1.37360000	12.36417112	0.554043
26	-0.04982207	8.97722910	-0.44726414		26.00000000	1.32076923	11.85684797	0.575427
27	-0.04001622	9.01356410	-0.36068879		27.00000000	1.27185185	11.46391819	0.596899
28	-0.02986429	8.99102780	-0.26851062		28.00000000	1.22642857	11.02685338	0.618291
29	-0.02003537	8.99256130	-0.18016926		29.00000000	1.18413793	10.64843293	0.639647
30	-0.00989385	8.98904510	-0.08893625		30.00000000	1.14466667	10.28946029	0.661009
31	-0.00064621	9.00615790	-0.00581985		31.00000000	1.10774194	9.97649878	0.682619
32	0.00946384	8.99122140	0.08509150		32.00000000	1.07312500	9.64870446	0.703991
33	0.01927760	8.98789690	0.17326505		33.00000000	1.04060606	9.35285999	0.725354
34	0.02946869	9.00638290	0.26540631		34.00000000	1.01000000	9.09644673	0.746724
35	0.03927128	8.99785710	0.35335737		35.00000000	0.98114286	8.82818322	0.768217
36	0.04939018	8.98749830	0.44389418		36.00000000	0.95388889	8.57307477	0.789613
37	0.05927092	8.99258800	0.53299898		37.00000000	0.92810811	8.34609384	0.810957
38	0.06942108	8.99226950	0.62425309		38.00000000	0.90368421	8.12617196	0.832333
39	0.07953775	8.99859810	0.71572824		39.00000000	0.88051282	7.92338099	0.853821
40	0.08938722	8.98151020	0.80283226		40.00000000	0.85850000	7.71062651	0.875201
41	0.09950836	9.01642800	0.89720996		41.00000000	0.83756098	7.55180823	0.896554
42	0.10934072	8.99211410	0.98320423		42.00000000	0.81761905	7.35212377	0.917933
43	0.11948567	8.98787500	1.07392227		43.00000000	0.79860465	7.17775878	0.939413
44	0.12930985	8.99689580	1.16338725		44.00000000	0.78045455	7.02166822	0.960784
45	0.13947637	8.98922350	1.25378426		45.00000000	0.76311111	6.85977633	0.982140
46	0.14928493	9.00089930	1.34369862		46.00000000	0.74652174	6.71936700	1.003509
47	0.15944996	8.99622630	1.43444792		47.00000000	0.73063830	6.57298747	1.025053
48	0.16958375	8.99259950	1.52499875		48.00000000	0.71541667	6.43345556	1.046437
49	0.17940123	8.99526310	1.61376126		49.00000000	0.70081633	6.30402724	1.067790
50	0.18955883	8.99312690	1.70472661		50.00000000	0.68680000	6.17647955	1.089157
51	0.19933984	8.98710440	1.79148795		51.00000000	0.67333333	6.05131696	1.110633
52	0.20947883	8.98622320	1.88242352		52.00000000	0.66038462	5.93436355	1.132005
53	0.21926208	8.98714920	1.97054103		53.00000000	0.64792453	5.82299441	1.153390
54	0.22943531	9.00370980	2.06576895		54.00000000	0.63592593	5.72569249	1.174726
55	0.23925948	8.98328590	2.14933631		55.00000000	0.62436364	5.60883705	1.196200
56	0.24936126	8.99392990	2.24273769		56.00000000	0.61321429	5.51520630	1.217594
57	0.25954342	8.99781700	2.33532420		57.00000000	0.60245614	5.42079010	1.238978
58	0.26936835	8.98566530	2.42045384		58.00000000	0.59206897	5.32013356	1.260488
59	0.27951998	8.99070550	2.51308182		59.00000000	0.58203390	5.23289537	1.281890
60	0.28934714	8.99931050	2.60392476		60.00000000	0.57233333	5.15060538	1.303244
61	0.29949656	9.00378610	2.69660296		61.00000000	0.56295082	5.06868877	1.324617
62	0.30933338	8.99124620	2.78129258		62.00000000	0.55387097	4.97999023	1.346107
63	0.31942251	8.99878310	2.87441388		63.00000000	0.54507937	4.90505098	1.367481
64	0.32928166	8.98584270	2.95887320		64.00000000	0.53656250	4.82146622	1.388850
65	0.33942810	8.99739460	3.05396855		65.00000000	0.52830769	4.75339278	1.410219
66	0.34923887	8.98295400	3.13719670		66.00000000	0.52030303	4.67385819	1.431694
67	0.35940245	8.99980260	3.23455110		67.00000000	0.51253731	4.61273465	1.453089
68	0.36955929	8.98967080	3.32221636		68.00000000	0.50500000	4.53978375	1.474440
69	0.37940356	8.98892020	3.41042832		69.00000000	0.49768116	4.47361623	1.495815
70	0.38950536	8.99855610	3.50498583		70.00000000	0.49057143	4.41443452	1.517309
71	0.39934292	8.98574540	3.58839381		71.00000000	0.48366197	4.34606334	1.538688
72	0.40952730	8.98154830	3.67818923		72.00000000	0.47694444	4.28369956	1.560029
73	0.41929939	8.98402690	3.76699700		73.00000000	0.47041096	4.22618471	1.581412
74	0.42948675	8.98443890	3.85869746		74.00000000	0.46405405	4.16926529	1.602890
75	0.43929160	8.97752950	3.94375330		75.00000000	0.45786667	4.11051151	1.624314
76	0.44945067	8.98785210	4.03959615		76.00000000	0.45184211	4.06109001	1.645675
77	0.45955470	8.96697240	4.12081431		77.00000000	0.44597403	3.99903678	1.667045
78	0.46947265	8.98066710	4.21617758		78.00000000	0.44025641	3.95379626	1.688517
79	0.47958857	8.97247510	4.30309650		79.00000000	0.43468354	3.90018728	1.709887
80	0.48935172	8.95575430	4.38251377		80.00000000	0.42925000	3.84425753	1.731257
81	0.49951527	8.94894030	4.47013233		81.00000000	0.42395062	3.79390876	1.752629
82	0.50936103	8.93093300	4.54906923		82.00000000	0.41878049	3.74010048	1.774100
83	0.51950669	8.89964870	4.62342704		83.00000000	0.41373494	3.68209562	1.795474
84	0.52923489	8.86370370	4.69098125		84.00000000	0.40880952	3.62356649	1.816858
85	0.53940517	8.81608100	4.75543967		85.00000000	0.40400000	3.56169672	1.838201
86	0.54955012	8.72084140	4.79253944		86.00000000	0.39930233	3.48225225	1.859674
87	0.55932736	8.62687020	4.82524453		87.00000000	0.39471264	3.40513474	1.881059
88	0.56949317	8.44474700	4.80922574		88.00000000	0.39022727	3.29537059	1.902444
89	0.57930839	8.26462550	4.78776689		89.00000000	0.38584270	3.18884539	1.923916
90	0.58944738	7.96137330	4.69281063		90.00000000	0.38155556	3.03770621	1.945311
91	0.59924406	7.57609460	4.53992969		91.00000000	0.37736264	2.85893504	1.966652
92	0.60934138	7.04499240	4.29280539		92.00000000	0.37326087	2.62961999	1.988114
93	0.61913574	6.38287830	3.95186808		93.00000000	0.36924731	2.35686065	2.009619
94	0.62923604	5.50370740	3.46313105		94.00000000	0.36531915	2.01060970	2.031052
95	0.63936758	4.41027690	2.81978807		95.00000000	0.36147368	1.59419904	2.052437
96	0.64915979	3.07738490	1.99771454		96.00000000	0.35770833	1.10080622	2.073818
97	0.65924889	1.41537310	0.93308315		97.00000000	0.35402062	0.50107126	2.095309
98	0.66898602	-0.51364893	-0.34362395		98.00000000	0.35040816	-0.17998678	2.116707
99	0.67906916	-2.86834290	-1.94780320		99.00000000	0.34686869	-0.99493834	2.138058
100	0.68879586	-5.57157950	-3.83768089		100.00000000	0.34340000	-1.91328040	2.159429
101	0.69902712	-8.82421970	-6.16836888		101.00000000	0.34000000	-3.00023470	2.180914
15:09 02/04/2018
Test Lot:	JK-PERC
Recipe:	Recipe_YJX-LID
Cell Name:	1-20-1.5h
Test Order:	3
Test Condition:	Light
1	-0.29989761	9.00039670	-2.69919746		1.00000000	34.34000000	309.07362268	0.000000
2	-0.29004040	8.98682880	-2.60654342		2.00000000	17.17000000	154.30385050	0.021500
3	-0.27994132	9.00453380	-2.52074108		3.00000000	11.44666667	103.07189690	0.043011
4	-0.27013025	8.98802850	-2.42793839		4.00000000	8.58500000	77.16222467	0.064401
5	-0.25997907	8.99118140	-2.33751898		5.00000000	6.86800000	61.75143386	0.085852
6	-0.24984276	8.99339580	-2.24693483		6.00000000	5.72333333	51.47220196	0.107212
7	-0.24000342	8.99776170	-2.15949358		7.00000000	4.90571429	44.14044811	0.128694
8	-0.22986339	8.98146340	-2.06450962		8.00000000	4.29250000	38.55293164	0.150068
9	-0.22001810	8.98764990	-1.97744565		9.00000000	3.81555556	34.29287751	0.171454
10	-0.20991082	8.98347090	-1.88572774		10.00000000	3.43400000	30.84923907	0.192942
11	-0.20004171	8.98982620	-1.79834021		11.00000000	3.12181818	28.06460288	0.214319
12	-0.18991210	8.99349780	-1.70797405		12.00000000	2.86166667	25.73639287	0.235673
13	-0.18011443	8.99409680	-1.61996662		13.00000000	2.64153846	23.75825262	0.257048
14	-0.16999003	8.99262620	-1.52865680		14.00000000	2.45285714	22.05762741	0.278515
15	-0.16018344	8.98751160	-1.43965053		15.00000000	2.28933333	20.57540989	0.299899
16	-0.15002184	8.98946090	-1.34861546		16.00000000	2.14625000	19.29363046	0.321246
17	-0.13984831	8.99322700	-1.25768760		17.00000000	2.02000000	18.16631854	0.342625
18	-0.13004544	8.98165700	-1.16802354		18.00000000	1.90777778	17.13500563	0.364110
19	-0.11987638	8.99538710	-1.07833444		19.00000000	1.80736842	16.25797858	0.385497
20	-0.11009213	8.99154000	-0.98989779		20.00000000	1.71700000	15.43847418	0.406858
21	-0.09990595	8.98980620	-0.89813516		21.00000000	1.63523810	14.70047357	0.428236
22	-0.09009415	8.99577710	-0.81046688		22.00000000	1.56090909	14.04159026	0.449715
23	-0.07994296	8.99990940	-0.71947937		23.00000000	1.49304348	13.43725603	0.471091
24	-0.07014753	8.99941540	-0.63128675		24.00000000	1.43083333	12.87666353	0.492440
25	-0.05999485	8.99600410	-0.53971389		25.00000000	1.37360000	12.35691123	0.513812
26	-0.04983323	8.98842240	-0.44792216		26.00000000	1.32076923	11.87163174	0.535283
27	-0.03998347	8.99376490	-0.35960197		27.00000000	1.27185185	11.43873654	0.556661
28	-0.02986280	8.99185560	-0.26852196		28.00000000	1.22642857	11.02786862	0.578022
29	-0.02006290	8.98365500	-0.18023820		29.00000000	1.18413793	10.63788664	0.599411
30	-0.00992734	8.98678870	-0.08921491		30.00000000	1.14466667	10.28687747	0.620894
31	-0.00068417	8.98564530	-0.00614767		31.00000000	1.10774194	9.95377612	0.642386
32	0.00953008	8.98705390	0.08564736		32.00000000	1.07312500	9.64423222	0.663764
33	0.01930811	8.98161700	0.17341808		33.00000000	1.04060606	9.34632508	0.685124
34	0.02946646	8.99567220	0.26507060		34.00000000	1.01000000	9.08562892	0.706587
35	0.03926756	8.98262500	0.35272578		35.00000000	0.98114286	8.81323836	0.727967
36	0.04941400	9.00015830	0.44473380		36.00000000	0.95388889	8.58515100	0.749345
37	0.05925157	8.98149200	0.53216749		37.00000000	0.92810811	8.33579555	0.770691
38	0.06938833	8.98637680	0.62354968		38.00000000	0.90368421	8.12084682	0.792173
39	0.07953923	8.98656850	0.71478476		39.00000000	0.88051282	7.91278878	0.813554
40	0.08935373	8.98667050	0.80299256		40.00000000	0.85850000	7.71505662	0.834955
41	0.09947189	8.98048400	0.89330571		41.00000000	0.83756098	7.52170294	0.856435
42	0.10931765	9.00810050	0.98474438		42.00000000	0.81761905	7.36519455	0.877814
43	0.11943506	8.97871490	1.07237335		43.00000000	0.79860465	7.17044348	0.899177
44	0.12930314	8.99769500	1.16343022		44.00000000	0.78045455	7.02229196	0.920551
45	0.13944586	8.99501610	1.25431776		45.00000000	0.76311111	6.86419673	0.942026
46	0.14925069	8.98481270	1.34098949		46.00000000	0.74652174	6.70735800	0.963423
47	0.15942764	8.99295710	1.43372593		47.00000000	0.73063830	6.57059887	0.984777
48	0.16955622	8.99043370	1.52438395		48.00000000	0.71541667	6.43190611	1.006149
49	0.17938262	8.98820400	1.61232758		49.00000000	0.70081633	6.29908011	1.027629
50	0.18951641	8.99106790	1.70395491		50.00000000	0.68680000	6.17506543	1.049006
51	0.19932793	8.98981950	1.79192211		51.00000000	0.67333333	6.05314513	1.070343
52	0.20946321	9.00126650	1.88543418		52.00000000	0.66038462	5.94429792	1.091734
53	0.21929185	8.97942920	1.96911564		53.00000000	0.64792453	5.81799243	1.113216
54	0.22942711	8.99009320	2.06257110		54.00000000	0.63592593	5.71703334	1.134602
55	0.23927808	8.99334720	2.15191085		55.00000000	0.62436364	5.61511896	1.155950
56	0.24940518	8.99185560	2.24261536		56.00000000	0.61321429	5.51393431	1.177319
57	0.25956798	8.97951600	2.33079483		57.00000000	0.60245614	5.40976455	1.198798
58	0.26934156	8.98854450	2.42098860		58.00000000	0.59206897	5.32183824	1.220177
59	0.27952966	8.98615460	2.51189674		59.00000000	0.58203390	5.23024659	1.241516
60	0.28935757	8.99867150	2.60383372		60.00000000	0.57233333	5.15023966	1.262888
61	0.29950401	8.99127480	2.69292286		61.00000000	0.56295082	5.06164552	1.284356
62	0.30932817	8.99150660	2.78132628		62.00000000	0.55387097	4.98013446	1.305793
63	0.31945601	8.98903660	2.87160177		63.00000000	0.54507937	4.89973836	1.327182
64	0.32929358	8.99290180	2.96130483		64.00000000	0.53656250	4.82525387	1.348559
65	0.33945042	8.98116300	3.04865955		65.00000000	0.52830769	4.74481750	1.370044
66	0.34924334	8.99732780	3.14225681		66.00000000	0.52030303	4.68133692	1.391428
67	0.35938978	8.98608110	3.22950571		67.00000000	0.51253731	4.60570187	1.412816
68	0.36955780	8.98407170	3.32013377		68.00000000	0.50500000	4.53695621	1.434167
69	0.37936413	8.98560520	3.40881630		69.00000000	0.49768116	4.47196641	1.455638
70	0.38949865	8.98513790	3.49969908		70.00000000	0.49057143	4.40785194	1.477012
71	0.39932060	8.98336790	3.58724386		71.00000000	0.48366197	4.34491343	1.498403
72	0.40946928	8.98773190	3.68020011		72.00000000	0.47694444	4.28664880	1.519893
73	0.41930908	8.98477750	3.76739879		73.00000000	0.47041096	4.22653780	1.541265
74	0.42944658	8.98489950	3.85853436		74.00000000	0.46405405	4.16947904	1.562623
75	0.43925959	8.97768310	3.94353340		75.00000000	0.45786667	4.11058184	1.584000
76	0.44942909	8.97885990	4.03536083		76.00000000	0.45184211	4.05702696	1.605480
77	0.45955396	8.97998810	4.12678909		77.00000000	0.44597403	4.00484145	1.626876
78	0.46939152	8.96782680	4.20942185		78.00000000	0.44025641	3.94814323	1.648222
79	0.47956848	8.96390340	4.29880553		79.00000000	0.43468354	3.89646130	1.669590
80	0.48938447	8.94950960	4.37975101		80.00000000	0.42925000	3.84157700	1.691080
81	0.49950114	8.94800090	4.46953665		81.00000000	0.42395062	3.79351051	1.712462
82	0.50934613	8.92760560	4.54724136		82.00000000	0.41878049	3.73870703	1.733825
83	0.51948142	8.89724160	4.62195170		83.00000000	0.41373494	3.68109972	1.755198
84	0.52926242	8.86524960	4.69204346		84.00000000	0.40880952	3.62419847	1.776677
85	0.53941184	8.80018520	4.74692409		85.00000000	0.40400000	3.55527482	1.798069
86	0.54955381	8.72373010	4.79415911		86.00000000	0.39930233	3.48340572	1.819410
87	0.55934376	8.62094880	4.82207392		87.00000000	0.39471264	3.40279749	1.840791
88	0.56948274	8.47038650	4.82373891		88.00000000	0.39022727	3.30537582	1.862272
89	0.57931960	8.25276470	4.78098834		89.00000000	0.38584270	3.18426899	1.883653
90	0.58942431	7.96559910	4.69511775		90.00000000	0.38155556	3.03931859	1.904993
91	0.59923065	7.57634640	4.53997898		91.00000000	0.37736264	2.85903006	1.926372
92	0.60936219	7.06006670	4.30213771		92.00000000	0.37326087	2.63524664	1.947845
93	0.61911118	6.39459470	3.95896507		93.00000000	0.36924731	2.36118690	1.969219
94	0.62923157	5.52381520	3.47575891		94.00000000	0.36531915	2.01795547	1.990710
95	0.63935494	4.41677470	2.82388672		95.00000000	0.36147368	1.59654782	2.012100
96	0.64917618	3.09443310	2.00883226		96.00000000	0.35770833	1.10690451	2.033586
97	0.65926307	1.41690410	0.93411255		97.00000000	0.35402062	0.50161327	2.054969
98	0.66902250	-0.52712065	-0.35265558		98.00000000	0.35040816	-0.18470738	2.076351
99	0.67906916	-2.90751190	-1.97440166		99.00000000	0.34686869	-1.00852483	2.097776
100	0.68876684	-5.63591380	-3.88183054		100.00000000	0.34340000	-1.93537280	2.119280
101	0.69908148	-8.95004080	-6.25680777		101.00000000	0.34000000	-3.04301387	2.140645
15:09 02/04/2018
Test Lot:	JK-PERC
Recipe:	Recipe_YJX-LID
Cell Name:	1-20-1.5h
Test Order:	4
Test Condition:	Light
1	-0.29989928	8.97889610	-2.69276448		1.00000000	34.34000000	308.33529207	0.000000
2	-0.29004803	8.98535440	-2.60618434		2.00000000	17.17000000	154.27853505	0.061789
3	-0.27991548	9.00539780	-2.52075025		3.00000000	11.44666667	103.08178682	0.083213
4	-0.27013347	8.98326870	-2.42668155		4.00000000	8.58500000	77.12136179	0.104744
5	-0.25995252	8.99505420	-2.33828701		5.00000000	6.86800000	61.77803225	0.126144
6	-0.24981177	8.99396610	-2.24679859		6.00000000	5.72333333	51.47546598	0.147504
7	-0.23996352	8.98045160	-2.15498078		7.00000000	4.90571429	44.05552971	0.168862
8	-0.22981830	8.98911290	-2.06586265		8.00000000	4.29250000	38.58576712	0.190355
9	-0.22000651	8.99578860	-1.97913205		9.00000000	3.81555556	34.32393117	0.211724
10	-0.20986502	8.99160290	-1.88702292		10.00000000	3.43400000	30.87716436	0.233112
11	-0.20004876	8.98255730	-1.79694945		11.00000000	3.12181818	28.04191070	0.254459
12	-0.18986335	8.99337010	-1.70751137		12.00000000	2.86166667	25.73602744	0.275936
13	-0.18012674	8.98580550	-1.61858385		13.00000000	2.64153846	23.73635084	0.297314
14	-0.16999492	8.99213220	-1.52861679		14.00000000	2.45285714	22.05641570	0.318702
15	-0.16015559	8.99703690	-1.44092575		15.00000000	2.28933333	20.59721648	0.340173
16	-0.14996944	8.97307490	-1.34568702		16.00000000	2.14625000	19.25846200	0.361565
17	-0.13981679	8.99568650	-1.25774801		17.00000000	2.02000000	18.17128673	0.382911
18	-0.12999533	8.99162290	-1.16886899		18.00000000	1.90777778	17.15401835	0.404294
19	-0.11985085	8.98850540	-1.07728001		19.00000000	1.80736842	16.24554081	0.425769
20	-0.11003534	8.98879620	-0.98908525		20.00000000	1.71700000	15.43376308	0.447146
21	-0.09988640	8.98609730	-0.89758893		21.00000000	1.63523810	14.69440863	0.468490
22	-0.09004634	8.99722390	-0.81016707		22.00000000	1.56090909	14.04384858	0.489871
23	-0.07992271	8.99058820	-0.71855214		23.00000000	1.49304348	13.42333908	0.511357
24	-0.07010496	8.98925970	-0.63019173		24.00000000	1.43083333	12.86213242	0.532732
25	-0.05997091	8.98354050	-0.53875112		25.00000000	1.37360000	12.33979123	0.554085
26	-0.04978476	8.99703030	-0.44791497		26.00000000	1.32076923	11.88300079	0.575454
27	-0.03999009	8.99016760	-0.35951765		27.00000000	1.27185185	11.43416131	0.596932
28	-0.02985306	8.99489590	-0.26852518		28.00000000	1.22642857	11.03159733	0.618322
29	-0.02003607	8.98624900	-0.18004910		29.00000000	1.18413793	10.64095830	0.639667
30	-0.00985512	8.99438000	-0.08864072		30.00000000	1.14466667	10.29556697	0.661036
31	-0.00060601	8.99096010	-0.00544863		31.00000000	1.10774194	9.95966354	0.682638
32	0.00952188	8.99338340	0.08563392		32.00000000	1.07312500	9.65102456	0.704018
33	0.01929617	8.98902800	0.17345382		33.00000000	1.04060606	9.35403702	0.725390
34	0.02946715	8.99448200	0.26504176		34.00000000	1.01000000	9.08442682	0.746767
35	0.03927791	8.98774810	0.35301997		35.00000000	0.98114286	8.81826485	0.768243
36	0.04944963	8.99299810	0.44470046		36.00000000	0.95388889	8.57832097	0.789623
37	0.05926263	8.97778130	0.53204690		37.00000000	0.92810811	8.33235162	0.810989
38	0.06943286	9.00539590	0.62527041		38.00000000	0.90368421	8.13803408	0.832348
39	0.07955919	8.98123930	0.71454008		39.00000000	0.88051282	7.90809635	0.853826
40	0.08941460	8.98835370	0.80369002		40.00000000	0.85850000	7.71650165	0.875202
41	0.09951711	8.99618050	0.89527386		41.00000000	0.83756098	7.53484972	0.896578
42	0.10932117	8.99284460	0.98310829		42.00000000	0.81761905	7.35272104	0.917931
43	0.11947949	8.99615100	1.07485553		43.00000000	0.79860465	7.18436803	0.939401
44	0.12931108	8.97886090	1.16106620		44.00000000	0.78045455	7.00759280	0.960786
45	0.13944337	8.99115090	1.25375638		45.00000000	0.76311111	6.86124715	0.982176
46	0.14929134	8.98593710	1.34152259		46.00000000	0.74652174	6.70819739	1.003658
47	0.15942660	8.98704530	1.43277408		47.00000000	0.73063830	6.56627948	1.025048
48	0.16961692	8.99637600	1.52593759		48.00000000	0.71541667	6.43615733	1.046387
49	0.17941652	8.98220350	1.61155569		49.00000000	0.70081633	6.29487486	1.067755
50	0.18955475	8.99352740	1.70476584		50.00000000	0.68680000	6.17675462	1.089243
51	0.19937369	8.98922820	1.79221560		51.00000000	0.67333333	6.05274699	1.110631
52	0.20949481	8.98562150	1.88244107		52.00000000	0.66038462	5.93396620	1.131974
53	0.21931525	8.98764800	1.97112827		53.00000000	0.64792453	5.82331759	1.153353
54	0.22945125	8.99469180	2.06384328		54.00000000	0.63592593	5.71995771	1.174837
55	0.23929326	8.98825550	2.15082896		55.00000000	0.62436364	5.61193989	1.196213
56	0.24941884	8.98586180	2.24124323		56.00000000	0.61321429	5.51025883	1.217570
57	0.25958982	8.99972530	2.33623707		57.00000000	0.60245614	5.42193977	1.238948
58	0.26941696	8.98751740	2.42138962		58.00000000	0.59206897	5.32123013	1.260428
59	0.27954403	8.99159430	2.51354651		59.00000000	0.58203390	5.23341268	1.281802
60	0.28935999	8.98472400	2.59981965		60.00000000	0.57233333	5.14225704	1.303145
61	0.29951608	8.97776130	2.68898387		61.00000000	0.56295082	5.05403808	1.324517
62	0.30932388	8.99094390	2.78111365		62.00000000	0.55387097	4.97982280	1.346005
63	0.31947625	8.99144460	2.87255300		63.00000000	0.54507937	4.90105091	1.367385
64	0.32928625	8.98885440	2.95990616		64.00000000	0.53656250	4.82308219	1.388747
65	0.33941630	8.98414990	3.04936692		65.00000000	0.52830769	4.74639550	1.410128
66	0.34927097	8.98287490	3.13745743		66.00000000	0.52030303	4.67381703	1.431594
67	0.35941812	8.98219200	3.22836256		67.00000000	0.51253731	4.60370856	1.452977
68	0.36958763	8.99090390	3.32292686		68.00000000	0.50500000	4.54040647	1.474337
69	0.37939021	8.98037340	3.40706575		69.00000000	0.49768116	4.46936265	1.495704
70	0.38954630	8.99031450	3.50214375		70.00000000	0.49057143	4.41039143	1.517183
71	0.39934587	8.97604080	3.58454482		71.00000000	0.48366197	4.34136959	1.538552
72	0.40947369	8.99265770	3.68225673		72.00000000	0.47694444	4.28899813	1.559991
73	0.41932985	8.97090530	3.76176837		73.00000000	0.47041096	4.22001216	1.581335
74	0.42946959	8.97925190	3.85631563		74.00000000	0.46405405	4.16685825	1.602808
75	0.43928853	8.97293000	3.94170523		75.00000000	0.45786667	4.10840555	1.624191
76	0.44946173	8.98634620	4.03901871		76.00000000	0.45184211	4.06040959	1.645565
77	0.45958358	8.96519950	4.12025848		77.00000000	0.44597403	3.99824611	1.667037
78	0.46945614	8.97627740	4.21396854		78.00000000	0.44025641	3.95186367	1.688427
79	0.47960180	8.96341420	4.29886958		79.00000000	0.43468354	3.89624865	1.709775
80	0.48941553	8.96940990	4.38976850		80.00000000	0.42925000	3.85011920	1.731156
81	0.49954855	8.95035170	4.47113521		81.00000000	0.42395062	3.79450713	1.752645
82	0.50938833	8.92711930	4.54737039		82.00000000	0.41878049	3.73850338	1.774029
83	0.51952064	8.90284820	4.62521339		83.00000000	0.41373494	3.68341936	1.795379
84	0.52930456	8.85794730	4.68855190		84.00000000	0.40880952	3.62121322	1.816771
85	0.53941679	8.80884550	4.75163916		85.00000000	0.40400000	3.55877358	1.838250
86	0.54956692	8.73368260	4.79974305		86.00000000	0.39930233	3.48737977	1.859635
87	0.55937171	8.61198430	4.81730038		87.00000000	0.39471264	3.39925909	1.880997
88	0.56952929	8.46797180	4.82275797		88.00000000	0.39022727	3.30443354	1.902373
89	0.57930881	8.24963570	4.77908664		89.00000000	0.38584270	3.18306168	1.923838
90	0.58946711	7.96153400	4.69306244		90.00000000	0.38155556	3.03776753	1.945212
91	0.59922874	7.57991270	4.54210154		91.00000000	0.37736264	2.86037585	1.966544
92	0.60935807	7.04963680	4.29575307		92.00000000	0.37326087	2.63135356	1.988024
93	0.61914873	6.39476730	3.95931205		93.00000000	0.36924731	2.36125064	2.009535
94	0.62929517	5.51061300	3.46780214		94.00000000	0.36531915	2.01313245	2.030908
95	0.63939023	4.42372510	2.82848661		95.00000000	0.36147368	1.59906021	2.052280
96	0.64916974	3.08492520	2.00264009		96.00000000	0.35770833	1.10350345	2.073654
97	0.65928489	1.41249970	0.93123971		97.00000000	0.35402062	0.50005402	2.095131
98	0.66902566	-0.53326583	-0.35676852		98.00000000	0.35040816	-0.18686070	2.116568
99	0.67908573	-2.91558620	-1.97993298		99.00000000	0.34686869	-1.01132556	2.137943
100	0.68882209	-5.64816670	-3.89058199		100.00000000	0.34340000	-1.93958044	2.159307
101	0.69911367	-8.96102140	-6.26477256		101.00000000	0.34000000	-3.04674728	2.180799
