# Supplementary material for: Study on the Electrical Injection Regeneration of Industrialized B-Doped Czochralski Silicon PERC Solar Cells
Source: Hindawi journal article supplement (doi:10.1155/2019/5357370), 2019-06-20
Supplement: f1 [file 5357370.f1.zip › section3.2/IVRawData_1-20-2-after.csv]

23:49 02/04/2018
Test Lot:	JK-PERC
Recipe:	Recipe_YJX-LID
Cell Name:	1-20-2-after
Test Order:	2
Test Condition:	Light
1	-0.29982230	9.11294170	-2.73226314		1.00000000	34.34000000	312.93841798	0.000000
2	-0.29005027	9.12005900	-2.64527558		2.00000000	17.17000000	156.59141303	0.061807
3	-0.27987704	9.10140710	-2.54727488		3.00000000	11.44666667	104.18077327	0.083291
4	-0.27010277	9.11712840	-2.46256164		4.00000000	8.58500000	78.27054731	0.104799
5	-0.25993475	9.10109140	-2.36568992		5.00000000	6.86800000	62.50629574	0.126184
6	-0.24974665	9.11304660	-2.27595286		6.00000000	5.72333333	52.15700337	0.147551
7	-0.23993143	9.11755560	-2.18758815		7.00000000	4.90571429	44.72812276	0.168923
8	-0.22975673	9.11120610	-2.09336092		8.00000000	4.29250000	39.10985218	0.190407
9	-0.21999213	9.10224630	-2.00242255		9.00000000	3.81555556	34.73012644	0.211791
10	-0.20978393	9.12247370	-1.91374838		10.00000000	3.43400000	31.32657469	0.233178
11	-0.19999030	9.10177040	-1.82026579		11.00000000	3.12181818	28.41407232	0.254517
12	-0.18985057	9.12768750	-1.73289667		12.00000000	2.86166667	26.12039906	0.276002
13	-0.18005247	9.10277180	-1.63897655		13.00000000	2.64153846	24.04532182	0.297374
14	-0.16991796	9.11041360	-1.54802289		14.00000000	2.45285714	22.34654307	0.318756
15	-0.16008563	9.11177540	-1.45866431		15.00000000	2.28933333	20.85989115	0.340173
16	-0.14998014	9.11427500	-1.36696024		16.00000000	2.14625000	19.56151272	0.361633
17	-0.13983743	9.11240770	-1.27425567		17.00000000	2.02000000	18.40706355	0.382996
18	-0.13001701	9.10003660	-1.18315955		18.00000000	1.90777778	17.36084760	0.404363
19	-0.11988547	9.12718010	-1.09421628		19.00000000	1.80736842	16.49617709	0.425726
20	-0.11007100	9.10393330	-1.00207904		20.00000000	1.71700000	15.63145348	0.447218
21	-0.09985015	9.11528970	-0.91016303		21.00000000	1.63523810	14.90566897	0.468607
22	-0.09007215	9.11138630	-0.82068214		22.00000000	1.56090909	14.22204571	0.489973
23	-0.07994731	9.12407400	-0.72944515		23.00000000	1.49304348	13.62263918	0.511346
24	-0.07009860	9.11869050	-0.63920745		24.00000000	1.43083333	13.04732632	0.532836
25	-0.05998046	9.10885620	-0.54635338		25.00000000	1.37360000	12.51192488	0.554208
26	-0.04982287	9.11514950	-0.45414288		26.00000000	1.32076923	12.03900899	0.575588
27	-0.03998756	9.11063000	-0.36431186		27.00000000	1.27185185	11.58737164	0.596932
28	-0.02982922	9.10557370	-0.27161219		28.00000000	1.22642857	11.16733574	0.618407
29	-0.02005718	9.12089160	-0.18293939		29.00000000	1.18413793	10.80039371	0.639797
30	-0.00988991	9.11017610	-0.09009886		30.00000000	1.14466667	10.42811491	0.661182
31	-0.00064187	9.11578660	-0.00585112		31.00000000	1.10774194	10.09793909	0.682777
32	0.00945895	9.11546330	0.08622272		32.00000000	1.07312500	9.78203155	0.704165
33	0.01927760	9.11230090	0.17566331		33.00000000	1.04060606	9.48231554	0.725517
34	0.02945203	9.10239790	0.26808406		34.00000000	1.01000000	9.19342188	0.746896
35	0.03926323	9.11059000	0.35771123		35.00000000	0.98114286	8.93879030	0.768375
36	0.04940714	9.10515790	0.44985980		36.00000000	0.95388889	8.68530895	0.789744
37	0.05925780	9.10926340	0.53979489		37.00000000	0.92810811	8.45438122	0.811111
38	0.06934588	9.10493470	0.63138975		38.00000000	0.90368421	8.22798573	0.832489
39	0.07952774	9.10226440	0.72388254		39.00000000	0.88051282	8.01466050	0.853960
40	0.08932333	9.10981080	0.81371861		40.00000000	0.85850000	7.82077257	0.875347
41	0.09947244	9.11351390	0.90654347		41.00000000	0.83756098	7.63312359	0.896703
42	0.10931937	9.11370940	0.99630497		42.00000000	0.81761905	7.45154240	0.918085
43	0.11945063	9.09935760	1.08692400		43.00000000	0.79860465	7.26678930	0.939568
44	0.12930277	9.11030010	1.17798704		44.00000000	0.78045455	7.11017512	0.960940
45	0.13941541	9.10357090	1.26917807		45.00000000	0.76311111	6.94703610	0.982274
46	0.14927277	9.11613560	1.36079081		46.00000000	0.74652174	6.80539340	1.003651
47	0.15949260	9.10864260	1.45276109		47.00000000	0.73063830	6.65512313	1.025152
48	0.16957696	9.12953090	1.54815810		48.00000000	0.71541667	6.53141856	1.046532
49	0.17932491	9.09269050	1.63054591		49.00000000	0.70081633	6.37230595	1.067881
50	0.18948890	9.10739140	1.72574958		50.00000000	0.68680000	6.25495641	1.089255
51	0.19927257	9.10317710	1.81401350		51.00000000	0.67333333	6.12947258	1.110730
52	0.20942020	9.12597660	1.91116384		52.00000000	0.66038462	6.02665455	1.132112
53	0.21926044	9.09455970	1.99407716		53.00000000	0.64792453	5.89258830	1.153470
54	0.22942370	9.11918450	2.09215705		54.00000000	0.63592593	5.79912585	1.174849
55	0.23922969	9.09576420	2.17597685		55.00000000	0.62436364	5.67906441	1.196331
56	0.24939965	9.11287500	2.27274784		56.00000000	0.61321429	5.58814513	1.217704
57	0.25947583	9.10551360	2.36266070		57.00000000	0.60245614	5.48567258	1.239099
58	0.26931235	9.10135360	2.45110693		58.00000000	0.59206897	5.38862901	1.260438
59	0.27951953	9.11273770	2.54718816		59.00000000	0.58203390	5.30392225	1.281932
60	0.28938803	9.10440730	2.63470649		60.00000000	0.57233333	5.21075578	1.303315
61	0.29948804	9.10729600	2.72752623		61.00000000	0.56295082	5.12695975	1.324701
62	0.30922481	9.10755630	2.81628237		62.00000000	0.55387097	5.04441102	1.346178
63	0.31942454	9.12132930	2.91357642		63.00000000	0.54507937	4.97184838	1.367554
64	0.32923946	9.10633660	2.99816534		64.00000000	0.53656250	4.88611873	1.388903
65	0.33940718	9.11576650	3.09395660		65.00000000	0.52830769	4.81592956	1.410279
66	0.34912983	9.10921190	3.18029760		66.00000000	0.52030303	4.73955056	1.431762
67	0.35936156	9.11392310	3.27519362		67.00000000	0.51253731	4.67122566	1.453139
68	0.36957172	9.08751390	3.35848814		68.00000000	0.50500000	4.58919452	1.474494
69	0.37934646	9.11950490	3.45945190		69.00000000	0.49768116	4.53860577	1.495874
70	0.38948962	9.10128500	3.54485604		70.00000000	0.49057143	4.46483038	1.517351
71	0.39931199	9.10702040	3.63654244		71.00000000	0.48366197	4.40471944	1.538749
72	0.40946260	9.11006930	3.73023266		72.00000000	0.47694444	4.34499694	1.560110
73	0.41933632	9.10762980	3.81915996		73.00000000	0.47041096	4.28432887	1.581479
74	0.42941770	9.09475140	3.90544723		74.00000000	0.46405405	4.22045626	1.602965
75	0.43925273	9.11880400	4.00545955		75.00000000	0.45786667	4.17519639	1.624345
76	0.44945320	9.08596990	4.08371825		76.00000000	0.45184211	4.10542377	1.645698
77	0.45952937	9.10974600	4.18619584		77.00000000	0.44597403	4.06271010	1.667070
78	0.46939269	9.09846970	4.27075517		78.00000000	0.44025641	4.00565961	1.688557
79	0.47953734	9.09670260	4.36220857		79.00000000	0.43468354	3.95418693	1.709939
80	0.48936418	9.08917620	4.44791726		80.00000000	0.42925000	3.90152888	1.731293
81	0.49951181	9.07144830	4.53129556		81.00000000	0.42395062	3.84584611	1.752669
82	0.50926721	9.06153870	4.61474453		82.00000000	0.41878049	3.79479560	1.774155
83	0.51945204	9.05817790	4.70528899		83.00000000	0.41373494	3.74768469	1.795544
84	0.52925652	9.02008340	4.77393795		84.00000000	0.40880952	3.68749600	1.816900
85	0.53938109	8.98290250	4.84520774		85.00000000	0.40400000	3.62909261	1.838269
86	0.54956001	8.92133140	4.90280697		86.00000000	0.39930233	3.56230838	1.859747
87	0.55926478	8.84097480	4.94444583		87.00000000	0.39471264	3.48964454	1.881115
88	0.56944513	8.72640230	4.96920729		88.00000000	0.39022727	3.40528017	1.902503
89	0.57932258	8.57200910	4.96595843		89.00000000	0.38584270	3.30744711	1.923842
90	0.58942479	8.33415990	4.91236045		90.00000000	0.38155556	3.17994501	1.945317
91	0.59923452	8.03437040	4.81447209		91.00000000	0.37736264	3.03187120	1.966685
92	0.60930401	7.58932070	4.62420354		92.00000000	0.37326087	2.83279644	1.988162
93	0.61907578	7.03634170	4.35602873		93.00000000	0.36924731	2.59815026	2.009663
94	0.62927550	6.25927350	3.93880746		94.00000000	0.36531915	2.28663247	2.031103
95	0.63933825	5.22967050	3.34352839		95.00000000	0.36147368	1.89038826	2.052466
96	0.64916807	3.97302750	2.57916259		96.00000000	0.35770833	1.42118505	2.073862
97	0.65926510	2.32684870	1.53401014		97.00000000	0.35402062	0.82375242	2.095351
98	0.66901529	0.36607856	0.24491215		98.00000000	0.35040816	0.12827692	2.116729
99	0.67907804	-2.06911990	-1.40509389		99.00000000	0.34686869	-0.71771290	2.138101
100	0.68880743	-4.87082620	-3.35506128		100.00000000	0.34340000	-1.67264172	2.159483
101	0.69902873	-8.30458350	-5.80514246		101.00000000	0.34000000	-2.82355839	2.180974
23:50 02/04/2018
Test Lot:	JK-PERC
Recipe:	Recipe_YJX-LID
Cell Name:	1-20-2-after
Test Order:	3
Test Condition:	Light
1	-0.29990494	9.09607320	-2.72795729		1.00000000	34.34000000	312.35915369	0.000000
2	-0.29001155	9.11145110	-2.64242606		2.00000000	17.17000000	156.44361539	0.021583
3	-0.27988523	9.10270020	-2.54771134		3.00000000	11.44666667	104.19557496	0.042976
4	-0.27013999	9.10276700	-2.45902139		4.00000000	8.58500000	78.14725470	0.064339
5	-0.25993997	9.11406140	-2.36910885		5.00000000	6.86800000	62.59537370	0.085713
6	-0.24974963	9.08932300	-2.27005506		6.00000000	5.72333333	52.02122530	0.107245
7	-0.23994781	9.11559300	-2.18726658		7.00000000	4.90571429	44.71849480	0.128640
8	-0.22982223	9.09983830	-2.09134513		8.00000000	4.29250000	39.06105590	0.150005
9	-0.22000478	9.11891560	-2.00620502		9.00000000	3.81555556	34.79372908	0.171393
10	-0.20981295	9.11308190	-1.91204260		10.00000000	3.43400000	31.29432324	0.192865
11	-0.19999550	9.10734460	-1.82142794		11.00000000	3.12181818	28.43147396	0.214252
12	-0.18983717	9.10754780	-1.72895110		12.00000000	2.86166667	26.06276595	0.235613
13	-0.18007779	9.09988120	-1.63868650		13.00000000	2.64153846	24.03768619	0.256980
14	-0.16992839	9.10928150	-1.54792554		14.00000000	2.45285714	22.34376619	0.278461
15	-0.16010721	9.09468460	-1.45612458		15.00000000	2.28933333	20.82076461	0.299858
16	-0.14998387	9.09633540	-1.36430359		16.00000000	2.14625000	19.52300985	0.321219
17	-0.13983074	9.09979820	-1.27243152		17.00000000	2.02000000	18.38159236	0.342597
18	-0.13003488	9.11270430	-1.18496941		18.00000000	1.90777778	17.38501476	0.364073
19	-0.11984528	9.08632560	-1.08895324		19.00000000	1.80736842	16.42233795	0.385444
20	-0.11001444	9.10497760	-1.00167901		20.00000000	1.71700000	15.63324654	0.406829
21	-0.09990448	9.10102940	-0.90923359		21.00000000	1.63523810	14.88234998	0.428175
22	-0.09008703	9.10918330	-0.82061931		22.00000000	1.56090909	14.21860702	0.449653
23	-0.07992423	9.10431860	-0.72765568		23.00000000	1.49304348	13.59314351	0.471036
24	-0.07015666	9.10813050	-0.63899598		24.00000000	1.43083333	13.03221672	0.492418
25	-0.05996557	9.11190320	-0.54640050		25.00000000	1.37360000	12.51611024	0.513895
26	-0.04979905	9.10473920	-0.45340734		26.00000000	1.32076923	12.02525939	0.535276
27	-0.04001287	9.09921070	-0.36408550		27.00000000	1.27185185	11.57284798	0.556616
28	-0.02984560	9.10843370	-0.27184664		28.00000000	1.22642857	11.17084333	0.577983
29	-0.02003932	9.10810850	-0.18252028		29.00000000	1.18413793	10.78525675	0.599466
30	-0.00988843	9.09631350	-0.08994822		30.00000000	1.14466667	10.41224685	0.620841
31	-0.00070811	9.09309290	-0.00643892		31.00000000	1.10774194	10.07280033	0.642305
32	0.00942992	9.09885310	0.08580150		32.00000000	1.07312500	9.76420673	0.663691
33	0.01930365	9.09656910	0.17559701		33.00000000	1.04060606	9.46594494	0.685166
34	0.02941481	9.10166840	0.26772385		34.00000000	1.01000000	9.19268508	0.706546
35	0.03922528	9.09969140	0.35693792		35.00000000	0.98114286	8.92809722	0.727914
36	0.04940565	9.10062600	0.44962237		36.00000000	0.95388889	8.68098602	0.749282
37	0.05922133	9.10464950	0.53918943		37.00000000	0.92810811	8.45009902	0.770760
38	0.06936821	9.10151860	0.63135602		38.00000000	0.90368421	8.22489865	0.792138
39	0.07946151	9.10822390	0.72375320		39.00000000	0.88051282	8.01990792	0.813493
40	0.08931514	9.08211330	0.81117021		40.00000000	0.85850000	7.79699427	0.834863
41	0.09950445	9.11285970	0.90677007		41.00000000	0.83756098	7.63257566	0.856344
42	0.10928365	9.10086250	0.99457547		42.00000000	0.81761905	7.44103853	0.877722
43	0.11943723	9.10363480	1.08731292		43.00000000	0.79860465	7.27020509	0.899133
44	0.12928565	9.09757710	1.17618617		44.00000000	0.78045455	7.10024540	0.920518
45	0.13943030	9.10465240	1.26946442		45.00000000	0.76311111	6.94786141	0.941999
46	0.14927799	9.10272980	1.35883721		46.00000000	0.74652174	6.79538568	0.963385
47	0.15942487	9.10488130	1.45154452		47.00000000	0.73063830	6.65237498	0.984763
48	0.16955836	9.09850120	1.54272694		48.00000000	0.71541667	6.50921940	1.006124
49	0.17936957	9.10299870	1.63280096		49.00000000	0.70081633	6.37953011	1.027602
50	0.18946882	9.09233190	1.72271340		50.00000000	0.68680000	6.24461355	1.048977
51	0.19934477	9.09483150	1.81300709		51.00000000	0.67333333	6.12385321	1.070358
52	0.20947677	9.10662650	1.90762670		52.00000000	0.66038462	6.01387604	1.091702
53	0.21925597	9.10230450	1.99573460		53.00000000	0.64792453	5.89760635	1.113185
54	0.22937904	9.09730340	2.08673072		54.00000000	0.63592593	5.78521109	1.134572
55	0.23920216	9.10644630	2.17828162		55.00000000	0.62436364	5.68573393	1.155954
56	0.24938031	9.10241600	2.26996332		56.00000000	0.61321429	5.58173153	1.177428
57	0.25953165	9.09837250	2.36131563		57.00000000	0.60245614	5.48137038	1.198818
58	0.26935476	9.11071680	2.45401494		58.00000000	0.59206897	5.39417267	1.220173
59	0.27946222	9.09226990	2.54094593		59.00000000	0.58203390	5.29200929	1.241547
60	0.28929424	9.09216120	2.63030986		60.00000000	0.57233333	5.20374693	1.263035
61	0.29941434	9.11340240	2.72868336		61.00000000	0.56295082	5.13039735	1.284407
62	0.30926499	9.10641000	2.81629380		62.00000000	0.55387097	5.04377612	1.305760
63	0.31942305	9.10286330	2.90766436		63.00000000	0.54507937	4.96178295	1.327144
64	0.32926401	9.10448550	2.99777940		64.00000000	0.53656250	4.88512550	1.348631
65	0.33937371	9.09579940	3.08687519		65.00000000	0.52830769	4.80538079	1.370015
66	0.34921765	9.09788700	3.17714272		66.00000000	0.52030303	4.73365818	1.391377
67	0.35934222	9.10159210	3.27058631		67.00000000	0.51253731	4.66490556	1.412755
68	0.36949950	9.11496260	3.36797412		68.00000000	0.50500000	4.60305611	1.434232
69	0.37932709	9.09542080	3.45013950		69.00000000	0.49768116	4.52661957	1.455601
70	0.38945687	9.10564710	3.54625682		70.00000000	0.49057143	4.46697031	1.476947
71	0.39929634	9.10034850	3.63373585		71.00000000	0.48366197	4.40149250	1.498329
72	0.40943503	9.10639290	3.72847625		72.00000000	0.47694444	4.34324350	1.519805
73	0.41930282	9.09309580	3.81276071		73.00000000	0.47041096	4.27749191	1.541177
74	0.42943335	9.09936710	3.90757170		74.00000000	0.46405405	4.22259819	1.562537
75	0.43922967	9.10108660	3.99746726		75.00000000	0.45786667	4.16708418	1.583902
76	0.44941002	9.10699080	4.09277292		76.00000000	0.45184211	4.11492190	1.605393
77	0.45953012	9.08393570	4.17434206		77.00000000	0.44597403	4.05119938	1.626771
78	0.46941650	9.10151390	4.27240080		78.00000000	0.44025641	4.00699984	1.648130
79	0.47954479	9.08339880	4.35589657		79.00000000	0.43468354	3.94840398	1.669491
80	0.48932397	9.08192630	4.44400423		80.00000000	0.42925000	3.89841686	1.690969
81	0.49950510	9.07119080	4.53110607		81.00000000	0.42395062	3.84573694	1.712344
82	0.50932449	9.06767850	4.61839073		82.00000000	0.41878049	3.79736683	1.733733
83	0.51946020	9.02929210	4.69035788		83.00000000	0.41373494	3.73573362	1.755071
84	0.52924985	9.00451560	4.76563853		84.00000000	0.40880952	3.68113173	1.776556
85	0.53936177	8.96695040	4.83643024		85.00000000	0.40400000	3.62264796	1.797939
86	0.54948854	8.91261390	4.89737920		86.00000000	0.39930233	3.55882746	1.819320
87	0.55932206	8.82810020	4.93775119		87.00000000	0.39471264	3.48456277	1.840803
88	0.56946224	8.72051530	4.96600418		88.00000000	0.39022727	3.40298290	1.862194
89	0.57932037	8.54332730	4.94932353		89.00000000	0.38584270	3.29638044	1.883537
90	0.58944118	8.31962110	4.90392728		90.00000000	0.38155556	3.17439765	1.904910
91	0.59924126	8.01046660	4.80020210		91.00000000	0.37736264	3.02285080	1.926401
92	0.60934496	7.56829260	4.61170095		92.00000000	0.37326087	2.82494748	1.947775
93	0.61908770	6.99530460	4.33070704		93.00000000	0.36924731	2.58299742	1.969130
94	0.62924945	6.23520990	3.92350240		94.00000000	0.36531915	2.27784157	1.990613
95	0.63933825	5.19800710	3.32328476		95.00000000	0.36147368	1.87894278	2.012116
96	0.64915246	3.95340780	2.56636440		96.00000000	0.35770833	1.41416692	2.033504
97	0.65925694	2.32535980	1.53300959		97.00000000	0.35402062	0.82322531	2.054844
98	0.66895944	0.40316787	0.26970295		98.00000000	0.35040816	0.14127331	2.076219
99	0.67904979	-1.98850120	-1.35029132		99.00000000	0.34686869	-0.68974880	2.097695
100	0.68880445	-4.71391920	-3.24696852		100.00000000	0.34340000	-1.61875985	2.119115
101	0.69900787	-8.04221150	-5.62156913		101.00000000	0.34000000	-2.73435191	2.140484
23:50 02/04/2018
Test Lot:	JK-PERC
Recipe:	Recipe_YJX-LID
Cell Name:	1-20-2-after
Test Order:	4
Test Condition:	Light
1	-0.29984778	9.10107040	-2.72893576		1.00000000	34.34000000	312.53075754	0.000000
2	-0.29002827	9.10274220	-2.64005257		2.00000000	17.17000000	156.29408357	0.061832
3	-0.27986416	9.09714510	-2.54596487		3.00000000	11.44666667	104.13198758	0.083261
4	-0.27011684	9.12739090	-2.46546199		4.00000000	8.58500000	78.35865088	0.104764
5	-0.25995496	9.09167000	-2.36342471		5.00000000	6.86800000	62.44158956	0.126162
6	-0.24979231	9.11233330	-2.27619078		6.00000000	5.72333333	52.15292092	0.147512
7	-0.23988125	9.10261920	-2.18354767		7.00000000	4.90571429	44.65484905	0.168888
8	-0.22982505	9.10662080	-2.09292958		8.00000000	4.29250000	39.09016978	0.190408
9	-0.21999364	9.10063170	-2.00208109		9.00000000	3.81555556	34.72396584	0.211784
10	-0.20978634	9.09824470	-1.90868746		10.00000000	3.43400000	31.24337230	0.233164
11	-0.19994971	9.09985350	-1.81951307		11.00000000	3.12181818	28.40808811	0.254518
12	-0.18988459	9.10885240	-1.72963070		12.00000000	2.86166667	26.06649928	0.275998
13	-0.18005987	9.09574510	-1.63777868		13.00000000	2.64153846	24.02676052	0.297375
14	-0.16993891	9.10360530	-1.54705676		14.00000000	2.45285714	22.32984329	0.318774
15	-0.16012833	9.10412790	-1.45782880		15.00000000	2.28933333	20.84238347	0.340174
16	-0.14989349	9.10198310	-1.36432801		16.00000000	2.14625000	19.53513123	0.361625
17	-0.13980752	9.11007880	-1.27365752		17.00000000	2.02000000	18.40235918	0.383010
18	-0.12998950	9.09280590	-1.18196929		18.00000000	1.90777778	17.34705303	0.404405
19	-0.11981868	9.10872550	-1.09139547		19.00000000	1.80736842	16.46282282	0.425769
20	-0.11000215	9.08998390	-0.99991777		20.00000000	1.71700000	15.60750236	0.447255
21	-0.09989683	9.10984130	-0.91004423		21.00000000	1.63523810	14.89675954	0.468633
22	-0.09000139	9.09491060	-0.81855459		22.00000000	1.56090909	14.19632864	0.490008
23	-0.07989831	9.11140350	-0.72798570		23.00000000	1.49304348	13.60372157	0.511361
24	-0.07007879	9.09554670	-0.63740491		24.00000000	1.43083333	13.01421140	0.532830
25	-0.05987894	9.09914780	-0.54484734		25.00000000	1.37360000	12.49858942	0.554221
26	-0.04976692	9.10282420	-0.45301953		26.00000000	1.32076923	12.02273012	0.575602
27	-0.04000323	9.09261420	-0.36373393		27.00000000	1.27185185	11.56445821	0.596947
28	-0.02984134	9.11228180	-0.27192271		28.00000000	1.22642857	11.17556275	0.618408
29	-0.01999876	9.10992530	-0.18218716		29.00000000	1.18413793	10.78740810	0.639776
30	-0.00985920	9.10020260	-0.08972068		30.00000000	1.14466667	10.41669858	0.661152
31	-0.00067382	9.09558680	-0.00612883		31.00000000	1.10774194	10.07556293	0.682751
32	0.00953623	9.09354210	0.08671815		32.00000000	1.07312500	9.75850737	0.704140
33	0.01930262	9.11231140	0.17589151		33.00000000	1.04060606	9.48232647	0.725496
34	0.02947167	9.09513760	0.26804886		34.00000000	1.01000000	9.18608898	0.746869
35	0.03925220	9.10969830	0.35757566		35.00000000	0.98114286	8.93791542	0.768341
36	0.04943091	9.10606480	0.45012111		36.00000000	0.95388889	8.68617403	0.789722
37	0.05921740	9.10349180	0.53908509		37.00000000	0.92810811	8.44902455	0.811081
38	0.06940802	9.10640910	0.63205784		38.00000000	0.90368421	8.22931812	0.832459
39	0.07949743	9.08639140	0.72234474		39.00000000	0.88051282	8.00068412	0.853933
40	0.08938737	9.11914540	0.81513638		40.00000000	0.85850000	7.82878633	0.875305
41	0.09953036	9.09673310	0.90540114		41.00000000	0.83756098	7.61906865	0.896649
42	0.10931833	9.10476020	0.99531718		42.00000000	0.81761905	7.44422536	0.918035
43	0.11950821	9.09834860	1.08732736		43.00000000	0.79860465	7.26598351	0.939518
44	0.12930512	9.10146430	1.17686593		44.00000000	0.78045455	7.10327918	0.960911
45	0.13944736	9.10174940	1.26921493		45.00000000	0.76311111	6.94564610	0.982260
46	0.14921302	9.09750080	1.35746557		46.00000000	0.74652174	6.79148212	1.003631
47	0.15946393	9.10571770	1.45203353		47.00000000	0.73063830	6.65298608	1.025101
48	0.16955705	9.10083010	1.54310990		48.00000000	0.71541667	6.51088553	1.046473
49	0.17936140	9.09783940	1.63180121		49.00000000	0.70081633	6.37591439	1.067829
50	0.18949844	9.09539600	1.72356335		50.00000000	0.68680000	6.24671797	1.089203
51	0.19927599	9.10541060	1.81448971		51.00000000	0.67333333	6.13097647	1.110676
52	0.20948151	9.10179810	1.90665841		52.00000000	0.66038462	6.01068744	1.132051
53	0.21925384	9.10445120	1.99618589		53.00000000	0.64792453	5.89899725	1.153418
54	0.22939982	9.09546660	2.08649840		54.00000000	0.63592593	5.78404302	1.174781
55	0.23924732	9.10345170	2.17797642		55.00000000	0.62436364	5.68386421	1.196263
56	0.24934417	9.10043810	2.26914118		56.00000000	0.61321429	5.58051865	1.217652
57	0.25947675	9.09761050	2.36061841		57.00000000	0.60245614	5.48091131	1.239032
58	0.26937339	9.10804270	2.45346434		58.00000000	0.59206897	5.39258942	1.260367
59	0.27950224	9.11079120	2.54648655		59.00000000	0.58203390	5.30278932	1.281836
60	0.28931925	9.09869580	2.63242784		60.00000000	0.57233333	5.20748690	1.303208
61	0.29946223	9.10500910	2.72660633		61.00000000	0.56295082	5.12567234	1.324594
62	0.30927104	9.09846020	2.81389025		62.00000000	0.55387097	5.03937296	1.346075
63	0.31947729	9.10469820	2.90874431		63.00000000	0.54507937	4.96278311	1.367447
64	0.32920945	9.11507510	3.00076886		64.00000000	0.53656250	4.89080748	1.388808
65	0.33938295	9.08913330	3.08469687		65.00000000	0.52830769	4.80185904	1.410186
66	0.34920293	9.10190960	3.17841350		66.00000000	0.52030303	4.73575115	1.431665
67	0.35932285	9.09511090	3.26808117		67.00000000	0.51253731	4.66158371	1.453059
68	0.36955369	9.09574030	3.36136439		68.00000000	0.50500000	4.59334885	1.474399
69	0.37936398	9.09615900	3.45075508		69.00000000	0.49768116	4.52698696	1.495768
70	0.38946158	9.09333320	3.54150392		70.00000000	0.49057143	4.46092946	1.517247
71	0.39927781	9.10221000	3.63431047		71.00000000	0.48366197	4.40239284	1.538620
72	0.40949896	9.09202380	3.72317429		72.00000000	0.47694444	4.33639024	1.559983
73	0.41930330	9.12439060	3.82588709		73.00000000	0.47041096	4.29221333	1.581362
74	0.42942101	9.07808400	3.89832000		74.00000000	0.46405405	4.21272168	1.602840
75	0.43925139	9.10646720	4.00002838		75.00000000	0.45786667	4.16954778	1.624223
76	0.44945318	9.08656310	4.08398468		76.00000000	0.45184211	4.10569180	1.645564
77	0.45954257	9.11507700	4.18876591		77.00000000	0.44597403	4.06508759	1.666933
78	0.46939903	9.07532880	4.25995054		78.00000000	0.44025641	3.99547168	1.688414
79	0.47958371	9.08900450	4.35893850		79.00000000	0.43468354	3.95084069	1.709776
80	0.48938209	9.07424550	4.44077323		80.00000000	0.42925000	3.89511988	1.731121
81	0.49949905	9.06393340	4.52742612		81.00000000	0.42395062	3.84266016	1.752498
82	0.50932425	9.06179240	4.61539062		82.00000000	0.41878049	3.79490184	1.773973
83	0.51945680	9.04637240	4.69919966		83.00000000	0.41373494	3.74280034	1.795360
84	0.52922541	9.00323300	4.76473968		84.00000000	0.40880952	3.68060740	1.816742
85	0.53936917	8.97952080	4.84327668		85.00000000	0.40400000	3.62772640	1.838109
86	0.54952556	8.90189460	4.89181862		86.00000000	0.39930233	3.55454722	1.859579
87	0.55941921	8.83396820	4.94189151		87.00000000	0.39471264	3.48687894	1.880967
88	0.56950784	8.70425610	4.95714209		88.00000000	0.39022727	3.39663812	1.902349
89	0.57928842	8.55391880	4.95518611		89.00000000	0.38584270	3.30046710	1.923692
90	0.58946788	8.31755830	4.90293346		90.00000000	0.38155556	3.17361058	1.945178
91	0.59920079	8.01911350	4.80505914		91.00000000	0.37736264	3.02611382	1.966546
92	0.60933405	7.58335210	4.62079465		92.00000000	0.37326087	2.83056860	1.988030
93	0.61906397	7.01121330	4.34038954		93.00000000	0.36924731	2.58887166	2.009527
94	0.62924570	6.24038790	3.92673725		94.00000000	0.36531915	2.27973320	2.030908
95	0.63936412	5.22251560	3.33908909		95.00000000	0.36147368	1.88780195	2.052281
96	0.64915508	3.96639560	2.57480585		96.00000000	0.35770833	1.41881276	2.073652
97	0.65925342	2.34623690	1.54676470		97.00000000	0.35402062	0.83061624	2.095139
98	0.66898185	0.41670671	0.27876923		98.00000000	0.35040816	0.14601743	2.116528
99	0.67904443	-1.98703670	-1.34928620		99.00000000	0.34686869	-0.68924081	2.137865
100	0.68877137	-4.71777580	-3.24946890		100.00000000	0.34340000	-1.62008421	2.159231
101	0.69900519	-8.05856130	-5.63297617		101.00000000	0.34000000	-2.73991084	2.180715
