# Supplementary material for: Study on the Electrical Injection Regeneration of Industrialized B-Doped Czochralski Silicon PERC Solar Cells
Source: Hindawi journal article supplement (doi:10.1155/2019/5357370), 2019-06-20
Supplement: f1 [file 5357370.f1.zip › section3.2/IVRawData_1-20-2.5h.csv]

16:34 02/04/2018
Test Lot:	JK-PERC
Recipe:	Recipe_YJX-LID
Cell Name:	1-20-2.5h
Test Order:	2
Test Condition:	Light
1	-0.29994479	8.99727340	-2.69868528		1.00000000	34.34000000	308.96636856	0.000000
2	-0.29015216	9.00449940	-2.61267495		2.00000000	17.17000000	154.60725470	0.061720
3	-0.27999780	9.00780870	-2.52216662		3.00000000	11.44666667	103.10938359	0.083265
4	-0.27021709	9.00988010	-2.43462358		4.00000000	8.58500000	77.34982066	0.104661
5	-0.26000839	9.01928900	-2.34509081		5.00000000	6.86800000	61.94447685	0.126037
6	-0.24986447	8.98546220	-2.24514775		6.00000000	5.72333333	51.42679532	0.147416
7	-0.24005175	9.01061250	-2.16301330		7.00000000	4.90571429	44.20349046	0.168909
8	-0.22991450	8.99833110	-2.06884680		8.00000000	4.29250000	38.62533625	0.190306
9	-0.22009955	9.00558570	-1.98212536		9.00000000	3.81555556	34.36131255	0.211655
10	-0.20997348	8.99488640	-1.88868760		10.00000000	3.43400000	30.88843990	0.233027
11	-0.20013024	9.00504020	-1.80218086		11.00000000	3.12181818	28.11209822	0.254527
12	-0.18999672	9.00111480	-1.71018229		12.00000000	2.86166667	25.75819019	0.275909
13	-0.18020335	9.01076410	-1.62376988		13.00000000	2.64153846	23.80227994	0.297254
14	-0.17005123	9.00106330	-1.53064189		14.00000000	2.45285714	22.07832241	0.318636
15	-0.16027126	8.99925420	-1.44232181		15.00000000	2.28933333	20.60229262	0.340129
16	-0.15010498	9.00507350	-1.35170638		16.00000000	2.14625000	19.32713900	0.361513
17	-0.13994171	9.00095650	-1.25960924		17.00000000	2.02000000	18.18193213	0.382874
18	-0.13012451	9.00728320	-1.17206831		18.00000000	1.90777778	17.18389473	0.404250
19	-0.11998728	9.00685210	-1.08070768		19.00000000	1.80736842	16.27870006	0.425741
20	-0.11015446	9.00137710	-0.99154183		20.00000000	1.71700000	15.45536448	0.447131
21	-0.09998447	9.01657390	-0.90151740		21.00000000	1.63523810	14.74424513	0.468497
22	-0.09017845	9.00403210	-0.81196961		22.00000000	1.56090909	14.05447556	0.489875
23	-0.08002335	9.00964640	-0.72098207		23.00000000	1.49304348	13.45179380	0.511367
24	-0.07020616	8.99090290	-0.63121675		24.00000000	1.43083333	12.86448357	0.532762
25	-0.06007636	9.00712970	-0.54111559		25.00000000	1.37360000	12.37219336	0.554154
26	-0.04986544	9.00395870	-0.44898639		26.00000000	1.32076923	11.89215161	0.575507
27	-0.04008026	9.00552370	-0.36094370		27.00000000	1.27185185	11.45369199	0.596990
28	-0.02994972	8.99886320	-0.26951342		28.00000000	1.22642857	11.03646294	0.618378
29	-0.02009159	9.00545410	-0.18093390		29.00000000	1.18413793	10.66369979	0.639773
30	-0.00994989	9.00773530	-0.08962598		30.00000000	1.14466667	10.31085434	0.661252
31	-0.00067826	9.00746150	-0.00610944		31.00000000	1.10774194	9.97794284	0.682765
32	0.00948630	9.00114150	0.08538755		32.00000000	1.07312500	9.65934997	0.704128
33	0.01929354	9.02148150	0.17405629		33.00000000	1.04060606	9.38780832	0.725503
34	0.02943346	8.98606490	0.26449099		34.00000000	1.01000000	9.07592555	0.746992
35	0.03926154	9.01242640	0.35384173		35.00000000	0.98114286	8.84247779	0.768374
36	0.04941262	8.99830440	0.44462982		36.00000000	0.95388889	8.58338259	0.789742
37	0.05923549	9.00992970	0.53370761		37.00000000	0.92810811	8.36218881	0.811122
38	0.06938509	9.00003530	0.62446825		38.00000000	0.90368421	8.13318979	0.832609
39	0.07952575	9.01057720	0.71657295		39.00000000	0.88051282	7.93392874	0.854003
40	0.08934118	8.99777700	0.80387201		40.00000000	0.85850000	7.72459155	0.875350
41	0.09948855	9.00806710	0.89619953		41.00000000	0.83756098	7.54480547	0.896725
42	0.10928908	9.00058560	0.98366572		42.00000000	0.81761905	7.35905023	0.918206
43	0.11944687	9.00068090	1.07510316		43.00000000	0.79860465	7.18798563	0.939600
44	0.12927569	9.01058100	1.16484908		44.00000000	0.78045455	7.03234890	0.960951
45	0.13940594	9.00185590	1.25491218		45.00000000	0.76311111	6.86941626	0.982335
46	0.14925633	9.00467780	1.34400516		46.00000000	0.74652174	6.72218773	1.003821
47	0.15938585	9.00314240	1.43497350		47.00000000	0.73063830	6.57804064	1.025203
48	0.16955107	9.01410390	1.52835096		48.00000000	0.71541667	6.44884017	1.046552
49	0.17934640	8.98909760	1.61216229		49.00000000	0.70081633	6.29970636	1.067926
50	0.18948632	8.99155710	1.70377707		50.00000000	0.68680000	6.17540142	1.089402
51	0.19928910	9.01455400	1.79650235		51.00000000	0.67333333	6.06979969	1.110775
52	0.20942530	9.00192450	1.88523074		52.00000000	0.66038462	5.94473245	1.132135
53	0.21923998	8.99320790	1.97167072		53.00000000	0.64792453	5.82691999	1.153494
54	0.22938585	9.00447460	2.06549906		54.00000000	0.63592593	5.72617885	1.174977
55	0.23920648	8.99353120	2.15131094		55.00000000	0.62436364	5.61523384	1.196359
56	0.24934641	9.01038360	2.24670680		56.00000000	0.61321429	5.52529594	1.217747
57	0.25952429	8.99257660	2.33379206		57.00000000	0.60245614	5.41763299	1.239095
58	0.26933151	9.00361630	2.42495757		58.00000000	0.59206897	5.33076179	1.260570
59	0.27949080	8.99487020	2.51398347		59.00000000	0.58203390	5.23531937	1.281960
60	0.28929061	8.99544050	2.60229647		60.00000000	0.57233333	5.14839045	1.303340
61	0.29945731	9.00494480	2.69659655		61.00000000	0.56295082	5.06934106	1.324834
62	0.30929282	9.00172230	2.78416808		62.00000000	0.55387097	4.98579264	1.346229
63	0.31943426	9.00177570	2.87547556		63.00000000	0.54507937	4.90668218	1.367576
64	0.32924744	9.00285720	2.96416769		64.00000000	0.53656250	4.83059557	1.388959
65	0.33939999	8.99565410	3.05312491		65.00000000	0.52830769	4.75247326	1.410446
66	0.34922734	9.01469610	3.14817834		66.00000000	0.52030303	4.69037370	1.431828
67	0.35938290	8.99572940	3.23291132		67.00000000	0.51253731	4.61064698	1.453244
68	0.36951315	8.99771690	3.32477471		68.00000000	0.50500000	4.54384703	1.474633
69	0.37937099	9.00229840	3.41521086		69.00000000	0.49768116	4.48027431	1.496125
70	0.38949379	9.00050260	3.50563987		70.00000000	0.49057143	4.41538942	1.517520
71	0.39931592	8.99388030	3.59139959		71.00000000	0.48366197	4.34999788	1.538883
72	0.40943798	9.00100140	3.68535183		72.00000000	0.47694444	4.29297761	1.560262
73	0.41927350	8.99875160	3.77293808		73.00000000	0.47041096	4.23311137	1.581757
74	0.42944765	8.99473290	3.86276691		74.00000000	0.46405405	4.17404227	1.603146
75	0.43924001	8.99365810	3.95037447		75.00000000	0.45786667	4.11789626	1.624495
76	0.44940969	8.99813940	4.04385104		76.00000000	0.45184211	4.06573825	1.645881
77	0.45952654	8.99441430	4.13317208		77.00000000	0.44597403	4.01127516	1.667372
78	0.46938962	8.97472480	4.21264266		78.00000000	0.44025641	3.95118012	1.688765
79	0.47955334	8.99252700	4.31239636		79.00000000	0.43468354	3.90890351	1.710114
80	0.48933601	8.96292590	4.38588240		80.00000000	0.42925000	3.84733594	1.731488
81	0.49949381	8.95012090	4.47052999		81.00000000	0.42395062	3.79440928	1.752968
82	0.50929880	8.93825820	4.55224418		82.00000000	0.41878049	3.74316813	1.774352
83	0.51943201	8.91558170	4.63103852		83.00000000	0.41373494	3.68868766	1.795716
84	0.52919984	8.87072940	4.69438858		84.00000000	0.40880952	3.62643866	1.817092
85	0.53936875	8.81652740	4.75535936		85.00000000	0.40400000	3.56187707	1.838586
86	0.54951537	8.75508980	4.81105641		86.00000000	0.39930233	3.49592772	1.859967
87	0.55932784	8.63987920	4.83252497		87.00000000	0.39471264	3.41026956	1.881362
88	0.56945062	8.49717040	4.83871895		88.00000000	0.39022727	3.31582763	1.902713
89	0.57927126	8.29838370	4.80701518		89.00000000	0.38584270	3.20187074	1.924191
90	0.58940226	8.01059340	4.72146185		90.00000000	0.38155556	3.05648642	1.945579
91	0.59917825	7.64917560	4.58321965		91.00000000	0.37736264	2.88651308	1.966970
92	0.60931820	7.12908220	4.34387953		92.00000000	0.37326087	2.66100742	1.988532
93	0.61914027	6.50210570	4.02571548		93.00000000	0.36924731	2.40088505	2.009931
94	0.62923408	5.62490750	3.53938350		94.00000000	0.36531915	2.05488642	2.031279
95	0.63937253	4.54110810	2.90345977		95.00000000	0.36147368	1.64149108	2.052677
96	0.64914101	3.23125030	2.09753708		96.00000000	0.35770833	1.15584516	2.074171
97	0.65926832	1.55440450	1.02476964		97.00000000	0.35402062	0.55029124	2.095607
98	0.66897655	-0.37324971	-0.24969530		98.00000000	0.35040816	-0.13078975	2.116992
99	0.67907256	-2.77613000	-1.88519371		99.00000000	0.34686869	-0.96295257	2.138378
100	0.68881130	-5.51299190	-3.79741112		100.00000000	0.34340000	-1.89316142	2.159869
101	0.69910163	-8.84865000	-6.18610564		101.00000000	0.34000000	-3.00854100	2.181257
16:34 02/04/2018
Test Lot:	JK-PERC
Recipe:	Recipe_YJX-LID
Cell Name:	1-20-2.5h
Test Order:	3
Test Condition:	Light
1	-0.29995084	9.00988860	-2.70252365		1.00000000	34.34000000	309.39957452	0.000000
2	-0.29015970	9.00788590	-2.61372547		2.00000000	17.17000000	154.66540090	0.061817
3	-0.28000164	9.00181770	-2.52052372		3.00000000	11.44666667	103.04080661	0.083244
4	-0.27016360	8.99998380	-2.43146802		4.00000000	8.58500000	77.26486092	0.104794
5	-0.26002413	9.00500870	-2.34151955		5.00000000	6.86800000	61.84639975	0.126191
6	-0.24985935	8.99642940	-2.24784200		6.00000000	5.72333333	51.48956427	0.147543
7	-0.24004290	9.00852200	-2.16243175		7.00000000	4.90571429	44.19323507	0.168926
8	-0.22987737	9.00136570	-2.06921027		8.00000000	4.29250000	38.63836227	0.190414
9	-0.22007878	8.99838640	-1.98035390		9.00000000	3.81555556	34.33384322	0.211789
10	-0.20991623	9.00874710	-1.89108223		10.00000000	3.43400000	30.93603754	0.233145
11	-0.20011839	9.01161100	-1.80338908		11.00000000	3.12181818	28.13261107	0.254529
12	-0.18998191	8.99655250	-1.70918223		12.00000000	2.86166667	25.74513440	0.276013
13	-0.18017587	9.00730320	-1.62289869		13.00000000	2.64153846	23.79313784	0.297397
14	-0.17004086	9.00694470	-1.53154862		14.00000000	2.45285714	22.09274864	0.318773
15	-0.16022517	8.99132060	-1.44063587		15.00000000	2.28933333	20.58412996	0.340130
16	-0.15012217	9.00889210	-1.35243443		16.00000000	2.14625000	19.33533467	0.361605
17	-0.13992091	8.99331860	-1.25835332		17.00000000	2.02000000	18.16650357	0.382985
18	-0.13009033	9.00482180	-1.17144024		18.00000000	1.90777778	17.17919892	0.404375
19	-0.11995754	8.99652290	-1.07920076		19.00000000	1.80736842	16.26003139	0.425738
20	-0.11014482	8.99801920	-0.99108521		20.00000000	1.71700000	15.44959897	0.447223
21	-0.10000237	9.00475310	-0.90049665		21.00000000	1.63523810	14.72491531	0.468608
22	-0.09016210	8.99540810	-0.81104487		22.00000000	1.56090909	14.04101428	0.489995
23	-0.08000551	8.99594210	-0.71972495		23.00000000	1.49304348	13.43133268	0.511483
24	-0.07019129	9.01432610	-0.63272721		24.00000000	1.43083333	12.89799826	0.532882
25	-0.06002726	8.98278810	-0.53921216		25.00000000	1.37360000	12.33875773	0.554230
26	-0.04988704	9.01315310	-0.44963955		26.00000000	1.32076923	11.90429529	0.575605
27	-0.04006687	9.01822760	-0.36133217		27.00000000	1.27185185	11.46984947	0.597125
28	-0.02991772	9.00030610	-0.26926867		28.00000000	1.22642857	11.03823255	0.618511
29	-0.02007597	9.00282100	-0.18074036		29.00000000	1.18413793	10.66058183	0.639862
30	-0.00993426	9.00040440	-0.08941240		30.00000000	1.14466667	10.30246290	0.661244
31	-0.00065073	9.01124190	-0.00586385		31.00000000	1.10774194	9.98213054	0.682848
32	0.00947961	9.00124070	0.08532822		32.00000000	1.07312500	9.65945643	0.704226
33	0.01932034	8.99171260	0.17372292		33.00000000	1.04060606	9.35683063	0.725596
34	0.02946250	9.00416090	0.26528507		34.00000000	1.01000000	9.09420251	0.746981
35	0.03927941	8.99126910	0.35317176		35.00000000	0.98114286	8.82171945	0.768460
36	0.04942083	9.01373000	0.44546598		36.00000000	0.95388889	8.59809689	0.789840
37	0.05923328	8.99723720	0.53293585		37.00000000	0.92810811	8.35040880	0.811194
38	0.06938065	9.00314140	0.62464378		38.00000000	0.90368421	8.13599673	0.832577
39	0.07953174	9.00472640	0.71616153		39.00000000	0.88051282	7.92877704	0.854061
40	0.08934865	8.99044130	0.80328380		40.00000000	0.85850000	7.71829386	0.875441
41	0.09950645	8.99971680	0.89552982		41.00000000	0.83756098	7.53781158	0.896810
42	0.10931070	9.00424580	0.98426041		42.00000000	0.81761905	7.36204288	0.918187
43	0.11945807	8.99461360	1.07447918		43.00000000	0.79860465	7.18314026	0.939663
44	0.12926903	9.00327970	1.16384523		44.00000000	0.78045455	7.02665057	0.961049
45	0.13944617	9.00480180	1.25568512		45.00000000	0.76311111	6.87166431	0.982412
46	0.14923629	9.00304790	1.34358147		46.00000000	0.74652174	6.72097098	1.003792
47	0.15939781	9.00050450	1.43466071		47.00000000	0.73063830	6.57611329	1.025278
48	0.16953178	8.99604700	1.52511586		48.00000000	0.71541667	6.43592196	1.046658
49	0.17937474	9.00225540	1.61477722		49.00000000	0.70081633	6.30892756	1.068048
50	0.18950500	8.99584870	1.70475831		50.00000000	0.68680000	6.17834889	1.089401
51	0.19930032	9.00878050	1.79545284		51.00000000	0.67333333	6.06591220	1.110914
52	0.20944248	8.99561790	1.88406452		52.00000000	0.66038462	5.94056767	1.132301
53	0.21925569	9.00412460	1.97420555		53.00000000	0.64792453	5.83399318	1.153686
54	0.22940007	8.98544980	2.06126281		54.00000000	0.63592593	5.71408048	1.175182
55	0.23923187	9.01341820	2.15629689		55.00000000	0.62436364	5.62765056	1.196568
56	0.24937254	8.98811820	2.24138987		56.00000000	0.61321429	5.51164248	1.217929
57	0.25949833	8.99242400	2.33351901		57.00000000	0.60245614	5.41754106	1.239307
58	0.26934353	9.01182750	2.42727743		58.00000000	0.59206897	5.33562339	1.260797
59	0.27948272	8.99103830	2.51283984		59.00000000	0.58203390	5.23308907	1.282183
60	0.28931451	8.99817470	2.60330250		60.00000000	0.57233333	5.14995532	1.303530
61	0.29947007	8.98663810	2.69122914		61.00000000	0.56295082	5.05903528	1.324924
62	0.30931005	9.00607870	2.78567065		62.00000000	0.55387097	4.98820553	1.346410
63	0.31946263	8.99078660	2.87222033		63.00000000	0.54507937	4.90069225	1.367813
64	0.32927433	8.99415110	2.96154308		64.00000000	0.53656250	4.82592420	1.389165
65	0.33943212	8.99929430	3.05464954		65.00000000	0.52830769	4.75439640	1.410547
66	0.34922448	9.00185300	3.14366743		66.00000000	0.52030303	4.68369139	1.432035
67	0.35939565	8.99935820	3.23433019		67.00000000	0.51253731	4.61250687	1.453415
68	0.36953411	9.00006870	3.32583238		68.00000000	0.50500000	4.54503469	1.474767
69	0.37936145	8.99560170	3.41258450		69.00000000	0.49768116	4.47694148	1.496151
70	0.38949317	8.98919770	3.50123111		70.00000000	0.49057143	4.40984356	1.517630
71	0.39933392	9.01151750	3.59860461		71.00000000	0.48366197	4.35852832	1.539012
72	0.40946788	8.99888420	3.68475404		72.00000000	0.47694444	4.29196783	1.560372
73	0.41926694	8.99132920	3.76976708		73.00000000	0.47041096	4.22961979	1.581761
74	0.42944184	8.99497410	3.86281823		74.00000000	0.46405405	4.17415420	1.603250
75	0.43926248	9.00140570	3.95397979		75.00000000	0.45786667	4.12144362	1.624649
76	0.44940463	8.98295500	4.03698157		76.00000000	0.45184211	4.05887730	1.646055
77	0.45955127	8.98362060	4.12843426		77.00000000	0.44597403	4.00646145	1.667429
78	0.46944037	8.99197670	4.22119687		78.00000000	0.44025641	3.95877538	1.688910
79	0.47954905	8.96939370	4.30126423		79.00000000	0.43468354	3.89884784	1.710296
80	0.48937044	8.98040770	4.39474607		80.00000000	0.42925000	3.85484001	1.731684
81	0.49947163	8.94424530	4.46739678		81.00000000	0.42395062	3.79191832	1.753048
82	0.50932431	8.94082740	4.55378075		82.00000000	0.41878049	3.74424406	1.774540
83	0.51946718	8.89894200	4.62270831		83.00000000	0.41373494	3.68180323	1.795935
84	0.52922380	8.86499600	4.69156687		84.00000000	0.40880952	3.62409479	1.817324
85	0.53937268	8.81754780	4.75594439		85.00000000	0.40400000	3.56228931	1.838814
86	0.54955500	8.72944160	4.79730828		86.00000000	0.39930233	3.48568633	1.860206
87	0.55935037	8.62189100	4.82265792		87.00000000	0.39471264	3.40316939	1.881568
88	0.56949180	8.46820160	4.82257137		88.00000000	0.39022727	3.30452322	1.902948
89	0.57928187	8.25997160	4.78485179		89.00000000	0.38584270	3.18704972	1.924436
90	0.58941364	7.95756200	4.69029558		90.00000000	0.38155556	3.03625199	1.945813
91	0.59921640	7.59108110	4.54870029		91.00000000	0.37736264	2.86459038	1.967207
92	0.60932285	7.06707190	4.30612839		92.00000000	0.37326087	2.63786140	1.988684
93	0.61913455	6.40697810	3.96678150		93.00000000	0.36924731	2.36575944	2.010214
94	0.62924320	5.53901960	3.48539042		94.00000000	0.36531915	2.02350993	2.031613
95	0.63940024	4.45715380	2.84990521		95.00000000	0.36147368	1.61114381	2.052970
96	0.64915836	3.15678310	2.04925214		96.00000000	0.35770833	1.12920762	2.074346
97	0.65924400	1.51487530	0.99867245		97.00000000	0.35402062	0.53629709	2.095863
98	0.66900134	-0.37747651	-0.25253229		98.00000000	0.35040816	-0.13227085	2.117252
99	0.67907506	-2.66506930	-1.80978209		99.00000000	0.34686869	-0.92442909	2.138608
100	0.68881381	-5.27755690	-3.63525408		100.00000000	0.34340000	-1.81231304	2.159992
101	0.69903487	-8.38298990	-5.86000225		101.00000000	0.34000000	-2.85021657	2.181473
16:34 02/04/2018
Test Lot:	JK-PERC
Recipe:	Recipe_YJX-LID
Cell Name:	1-20-2.5h
Test Order:	4
Test Condition:	Light
1	-0.29995084	9.00183110	-2.70010680		1.00000000	34.34000000	309.12287997	0.000000
2	-0.29009050	9.01622390	-2.61552090		2.00000000	17.17000000	154.80856436	0.021590
3	-0.27994731	8.98495390	-2.51531367		3.00000000	11.44666667	102.84777231	0.042979
4	-0.27021271	9.01212980	-2.43519202		4.00000000	8.58500000	77.36913433	0.064341
5	-0.26006728	9.00761220	-2.34258520		5.00000000	6.86800000	61.86428059	0.085780
6	-0.24990772	8.99527740	-2.24798927		6.00000000	5.72333333	51.48297099	0.107278
7	-0.24001461	8.99932770	-2.15997013		7.00000000	4.90571429	44.14813046	0.128655
8	-0.22989151	8.99504760	-2.06788508		8.00000000	4.29250000	38.61124182	0.150029
9	-0.22005124	8.99554630	-1.97948112		9.00000000	3.81555556	34.32300666	0.171404
10	-0.20990358	9.00334170	-1.88983365		10.00000000	3.43400000	30.91747540	0.192883
11	-0.20007969	9.00823500	-1.80236487		11.00000000	3.12181818	28.12207181	0.214260
12	-0.18992460	8.99446490	-1.70827015		12.00000000	2.86166667	25.73916039	0.235605
13	-0.18016471	9.00290110	-1.62200507		13.00000000	2.64153846	23.78150952	0.256980
14	-0.16999622	8.99830630	-1.52967806		14.00000000	2.45285714	22.07155988	0.278458
15	-0.16019689	9.00497720	-1.44256934		15.00000000	2.28933333	20.61539447	0.299827
16	-0.15003805	8.99806120	-1.35005156		16.00000000	2.14625000	19.31208885	0.321197
17	-0.13990082	8.99875740	-1.25893354		17.00000000	2.02000000	18.17748995	0.342578
18	-0.13010372	8.99706840	-1.17055207		18.00000000	1.90777778	17.16440716	0.364061
19	-0.11992034	8.99928760	-1.07919763		19.00000000	1.80736842	16.26502822	0.385440
20	-0.11010090	8.99514100	-0.99037312		20.00000000	1.71700000	15.44465710	0.406782
21	-0.09993911	9.00752070	-0.90020358		21.00000000	1.63523810	14.72944099	0.428158
22	-0.09012266	8.99615570	-0.81075744		22.00000000	1.56090909	14.04218122	0.449646
23	-0.08000328	9.01042460	-0.72086349		23.00000000	1.49304348	13.45295569	0.471026
24	-0.07016078	9.00085160	-0.63150673		24.00000000	1.43083333	12.87871850	0.492408
25	-0.06003992	9.00332640	-0.54055895		25.00000000	1.37360000	12.36696914	0.513762
26	-0.04989076	8.99614050	-0.44882432		26.00000000	1.32076923	11.88182557	0.535236
27	-0.04004008	9.00892730	-0.36071817		27.00000000	1.27185185	11.45802087	0.556625
28	-0.02991921	8.99100490	-0.26900379		28.00000000	1.22642857	11.02682530	0.578012
29	-0.02011021	9.00033760	-0.18099865		29.00000000	1.18413793	10.65764114	0.599404
30	-0.00996850	9.00703620	-0.08978665		30.00000000	1.14466667	10.31005410	0.620874
31	-0.00067827	8.99252890	-0.00609932		31.00000000	1.10774194	9.96140137	0.642363
32	0.00947663	9.00528050	0.08533971		32.00000000	1.07312500	9.66379164	0.663747
33	0.01928536	9.00023080	0.17357266		33.00000000	1.04060606	9.36569472	0.685245
34	0.02942975	8.99861340	0.26482695		34.00000000	1.01000000	9.08859953	0.706619
35	0.03925336	8.99464700	0.35307013		35.00000000	0.98114286	8.82503366	0.727970
36	0.04940520	9.00780580	0.44503244		36.00000000	0.95388889	8.59244587	0.749361
37	0.05921020	8.99332140	0.53249639		37.00000000	0.92810811	8.34677451	0.770844
38	0.06938288	9.00325490	0.62467172		38.00000000	0.90368421	8.13609930	0.792211
39	0.07953472	9.00302310	0.71605289		39.00000000	0.88051282	7.92727726	0.813570
40	0.08936652	8.98869040	0.80328796		40.00000000	0.85850000	7.71679071	0.834952
41	0.09950496	9.00296120	0.89583925		41.00000000	0.83756098	7.54052897	0.856427
42	0.10930698	9.00193790	0.98397465		42.00000000	0.81761905	7.36015589	0.877806
43	0.11947594	9.00093170	1.07539478		43.00000000	0.79860465	7.18818592	0.899154
44	0.12928317	8.99778080	1.16326162		44.00000000	0.78045455	7.02235892	0.920543
45	0.13944171	8.99988370	1.25495917		45.00000000	0.76311111	6.86791125	0.942028
46	0.14926086	8.99262910	1.34224755		46.00000000	0.74652174	6.71319312	0.963399
47	0.15940301	8.99967480	1.43457525		47.00000000	0.73063830	6.57550708	0.984758
48	0.16955782	8.99307820	1.52484673		48.00000000	0.71541667	6.43379803	1.006128
49	0.17936954	9.01082320	1.61626721		49.00000000	0.70081633	6.31493201	1.027597
50	0.18954146	8.99652290	1.70521409		50.00000000	0.68680000	6.17881193	1.048976
51	0.19930479	9.00618550	1.79497591		51.00000000	0.67333333	6.06416490	1.070330
52	0.20945142	8.99664590	1.88436026		52.00000000	0.66038462	5.94124654	1.091709
53	0.21927279	9.00939660	1.97551553		53.00000000	0.64792453	5.83740904	1.113198
54	0.22942315	8.99747370	2.06422876		54.00000000	0.63592593	5.72172679	1.134585
55	0.23924750	8.99542430	2.15213278		55.00000000	0.62436364	5.61641583	1.155990
56	0.24938296	9.00675770	2.24613190		56.00000000	0.61321429	5.52307249	1.177344
57	0.25951916	8.98748400	2.33242430		57.00000000	0.60245614	5.41456492	1.198816
58	0.26934502	8.99999050	2.42410262		58.00000000	0.59206897	5.32861507	1.220205
59	0.27950951	8.99565320	2.51437062		59.00000000	0.58203390	5.23577510	1.241584
60	0.28931451	9.00020220	2.60388909		60.00000000	0.57233333	5.15111573	1.262928
61	0.29949686	8.99835490	2.69497904		61.00000000	0.56295082	5.06563127	1.284406
62	0.30931228	8.99530600	2.78235861		62.00000000	0.55387097	4.98223884	1.305791
63	0.31944776	9.00862220	2.87778418		63.00000000	0.54507937	4.91041407	1.327187
64	0.32927209	8.98674300	2.95908365		64.00000000	0.53656250	4.82194929	1.348678
65	0.33941948	8.99776740	3.05401753		65.00000000	0.52830769	4.75358973	1.370050
66	0.34920663	9.00056930	3.14305847		66.00000000	0.52030303	4.68302348	1.391403
67	0.35937482	9.00354190	3.23564625		67.00000000	0.51253731	4.61465118	1.412783
68	0.36954230	8.99517440	3.32409744		68.00000000	0.50500000	4.54256307	1.434268
69	0.37936813	9.00700000	3.41696875		69.00000000	0.49768116	4.48261420	1.455654
70	0.38951328	8.99314310	3.50294867		70.00000000	0.49057143	4.41177906	1.477001
71	0.39931828	9.00393390	3.59543540		71.00000000	0.48366197	4.35486042	1.498370
72	0.40947682	8.99210360	3.68205799		72.00000000	0.47694444	4.28873386	1.519855
73	0.41929448	8.99871350	3.77311090		73.00000000	0.47041096	4.23309345	1.541222
74	0.42943513	8.98846720	3.85996358		74.00000000	0.46405405	4.17113464	1.562578
75	0.43927515	8.99616240	3.95179059		75.00000000	0.45786667	4.11904289	1.583963
76	0.44944930	8.98765280	4.03949426		76.00000000	0.45184211	4.06099996	1.605436
77	0.45958847	8.97416970	4.12442492		77.00000000	0.44597403	4.00224659	1.626808
78	0.46941581	8.98828320	4.21924224		78.00000000	0.44025641	3.95714930	1.648171
79	0.47956914	8.96916960	4.30133695		79.00000000	0.43468354	3.89875043	1.669546
80	0.48937264	8.96368120	4.38658033		80.00000000	0.42925000	3.84766016	1.691022
81	0.49951556	8.95347400	4.47239958		81.00000000	0.42395062	3.79583083	1.712403
82	0.50932729	8.92646980	4.54649467		82.00000000	0.41878049	3.73823138	1.733754
83	0.51946348	8.90318580	4.62487988		83.00000000	0.41373494	3.68355904	1.755134
84	0.52926254	8.87797450	4.69877933		84.00000000	0.40880952	3.62940053	1.776608
85	0.53940690	8.80748940	4.75082055		85.00000000	0.40400000	3.55822572	1.797993
86	0.54952008	8.73838520	4.80191813		86.00000000	0.39930233	3.48925753	1.819372
87	0.55937493	8.62747380	4.82599255		87.00000000	0.39471264	3.40537299	1.840739
88	0.56947392	8.46956540	4.82319661		88.00000000	0.39022727	3.30505541	1.862219
89	0.57925880	8.27162550	4.79141186		89.00000000	0.38584270	3.19154629	1.883608
90	0.58941436	7.97599270	4.70116463		90.00000000	0.38155556	3.04328433	1.904987
91	0.59921044	7.59270760	4.54962966		91.00000000	0.37736264	2.86520416	1.926330
92	0.60931468	7.07869050	4.31315004		92.00000000	0.37326087	2.64219817	1.947810
93	0.61911446	6.41886810	3.97401406		93.00000000	0.36924731	2.37014979	1.969178
94	0.62923652	5.57091760	3.50542480		94.00000000	0.36531915	2.03516288	1.990656
95	0.63937718	4.46871850	2.85719663		95.00000000	0.36147368	1.61532414	2.012170
96	0.64916360	3.15462680	2.04786889		96.00000000	0.35770833	1.12843629	2.033553
97	0.65927005	1.50653470	0.99321321		97.00000000	0.35402062	0.53334435	2.054910
98	0.66901326	-0.39965361	-0.26737356		98.00000000	0.35040816	-0.14004189	2.076340
99	0.67905569	-2.72389460	-1.84967613		99.00000000	0.34686869	-0.94483374	2.097825
100	0.68879592	-5.35700610	-3.68988395		100.00000000	0.34340000	-1.83959589	2.119227
101	0.69902068	-8.52165600	-5.95681377		101.00000000	0.34000000	-2.89736304	2.140576
