# Supplementary material for: Study on the Electrical Injection Regeneration of Industrialized B-Doped Czochralski Silicon PERC Solar Cells
Source: Hindawi journal article supplement (doi:10.1155/2019/5357370), 2019-06-20
Supplement: f1 [file 5357370.f1.zip › section3.2/IVRawData_1-20-3h.csv]

17:15 02/04/2018
Test Lot:	JK-PERC
Recipe:	Recipe_YJX-LID
Cell Name:	1-20-3h
Test Order:	2
Test Condition:	Light
1	-0.29996359	9.00827880	-2.70215565		1.00000000	34.34000000	309.34429399	0.000000
2	-0.29017323	9.00037000	-2.61166643		2.00000000	17.17000000	154.53635290	0.061720
3	-0.28000778	8.98802570	-2.51671712		3.00000000	11.44666667	102.88293418	0.083258
4	-0.27019137	9.01035690	-2.43452067		4.00000000	8.58500000	77.35391399	0.104713
5	-0.26001471	8.98821740	-2.33706874		5.00000000	6.86800000	61.73107710	0.126077
6	-0.24985521	8.99848270	-2.24831778		6.00000000	5.72333333	51.50131599	0.147502
7	-0.24006261	8.99232100	-2.15872005		7.00000000	4.90571429	44.11375759	0.169013
8	-0.22993213	8.99553010	-2.06836140		8.00000000	4.29250000	38.61331295	0.190401
9	-0.22009042	8.99678900	-1.98010707		9.00000000	3.81555556	34.32774825	0.211741
10	-0.20999266	9.00122930	-1.89019208		10.00000000	3.43400000	30.91022142	0.233123
11	-0.20012267	8.99480250	-1.80006389		11.00000000	3.12181818	28.08013799	0.254610
12	-0.18999068	8.99893000	-1.70971283		12.00000000	2.86166667	25.75193802	0.275981
13	-0.18019214	8.98839570	-1.61963826		13.00000000	2.64153846	23.74319295	0.297341
14	-0.17007877	8.99213790	-1.52937175		14.00000000	2.45285714	22.05642968	0.318712
15	-0.16026238	9.00721740	-1.44351810		15.00000000	2.28933333	20.62052303	0.340186
16	-0.15011476	8.98787020	-1.34921198		16.00000000	2.14625000	19.29021642	0.361580
17	-0.13995226	8.99748990	-1.25921905		17.00000000	2.02000000	18.17492960	0.382932
18	-0.13011725	8.98845100	-1.16955253		18.00000000	1.90777778	17.14796707	0.404312
19	-0.11998378	8.99146650	-1.07883014		19.00000000	1.80736842	16.25089261	0.425797
20	-0.11015472	9.00746440	-0.99221472		20.00000000	1.71700000	15.46581637	0.447183
21	-0.10001678	8.99360470	-0.89951138		21.00000000	1.63523810	14.70668502	0.468548
22	-0.09016688	9.00182530	-0.81166652		22.00000000	1.56090909	14.05103095	0.489930
23	-0.08005723	8.99052050	-0.71975620		23.00000000	1.49304348	13.42323800	0.511418
24	-0.07021478	9.00632480	-0.63237710		24.00000000	1.43083333	12.88654973	0.532807
25	-0.06007312	8.99366470	-0.54027749		25.00000000	1.37360000	12.35369783	0.554159
26	-0.04987638	8.98785500	-0.44828171		26.00000000	1.32076923	11.87088233	0.575528
27	-0.04006891	9.00626090	-0.36087106		27.00000000	1.27185185	11.45462960	0.597008
28	-0.02995628	8.99073410	-0.26932894		28.00000000	1.22642857	11.02649318	0.618400
29	-0.02009819	8.98894310	-0.18066152		29.00000000	1.18413793	10.64414848	0.639768
30	-0.00998110	8.99867150	-0.08981663		30.00000000	1.14466667	10.30047931	0.661147
31	-0.00066783	8.98912530	-0.00600322		31.00000000	1.10774194	9.95763106	0.682741
32	0.00945278	9.00251480	0.08509879		32.00000000	1.07312500	9.66082369	0.704131
33	0.01926816	8.99666690	0.17334923		33.00000000	1.04060606	9.36198610	0.725519
34	0.02943186	8.99248980	0.26466567		34.00000000	1.01000000	9.08241470	0.746874
35	0.03924426	9.00185680	0.35327122		35.00000000	0.98114286	8.83210750	0.768347
36	0.04937521	8.98425870	0.44359966		36.00000000	0.95388889	8.56998455	0.789725
37	0.05920845	9.00122930	0.53294886		37.00000000	0.92810811	8.35411390	0.811108
38	0.06933568	9.00146010	0.62412233		38.00000000	0.90368421	8.13447736	0.832591
39	0.07948003	8.98516370	0.71414108		39.00000000	0.88051282	7.91155183	0.853966
40	0.08929243	9.00329400	0.80392599		40.00000000	0.85850000	7.72932790	0.875318
41	0.09946580	8.99818230	0.89501142		41.00000000	0.83756098	7.53652635	0.896717
42	0.10927597	9.00600430	0.98413986		42.00000000	0.81761905	7.36348066	0.918193
43	0.11942255	8.99503800	1.07421038		43.00000000	0.79860465	7.18347918	0.939580
44	0.12924166	8.99219610	1.16216635		44.00000000	0.78045455	7.01800032	0.960940
45	0.13941205	8.99395850	1.25386619		45.00000000	0.76311111	6.86338966	0.982313
46	0.14921626	8.99838260	1.34270500		46.00000000	0.74652174	6.71748823	1.003793
47	0.15935764	8.99381640	1.43323336		47.00000000	0.73063830	6.57122671	1.025165
48	0.16948412	8.99102310	1.52383564		48.00000000	0.71541667	6.43232778	1.046517
49	0.17930396	8.99572560	1.61296922		49.00000000	0.70081633	6.30435137	1.067888
50	0.18946245	8.99829100	1.70483826		50.00000000	0.68680000	6.18002626	1.089363
51	0.19927783	8.99319080	1.79214355		51.00000000	0.67333333	6.05541514	1.110755
52	0.20938496	8.99652860	1.88373778		52.00000000	0.66038462	5.94116908	1.132115
53	0.21923533	8.99826240	1.97273703		53.00000000	0.64792453	5.83019492	1.153490
54	0.22940126	8.98950770	2.06220439		54.00000000	0.63592593	5.71666101	1.174966
55	0.23919579	8.98901180	2.15013378		55.00000000	0.62436364	5.61241209	1.196354
56	0.24932377	8.99694060	2.24315115		56.00000000	0.61321429	5.51705250	1.217704
57	0.25949565	8.98541550	2.33167624		57.00000000	0.60245614	5.41331874	1.239080
58	0.26931104	8.99955080	2.42367839		58.00000000	0.59206897	5.32835473	1.260565
59	0.27950525	8.99715900	2.51475318		59.00000000	0.58203390	5.23665153	1.281934
60	0.28930351	8.98830890	2.60034931		60.00000000	0.57233333	5.14430879	1.303310
61	0.29944563	8.99188420	2.69258043		61.00000000	0.56295082	5.06198858	1.324671
62	0.30925503	8.98802190	2.77959098		62.00000000	0.55387097	4.97820439	1.346145
63	0.31939790	8.99500270	2.87298497		63.00000000	0.54507937	4.90299036	1.367545
64	0.32922444	8.98958590	2.95959138		64.00000000	0.53656250	4.82347468	1.388928
65	0.33938739	8.98817540	3.05047339		65.00000000	0.52830769	4.74852220	1.410277
66	0.34919906	8.99976920	3.14271094		66.00000000	0.52030303	4.68260719	1.431746
67	0.35937244	8.98629670	3.22942737		67.00000000	0.51253731	4.60581237	1.453119
68	0.36950710	8.97930430	3.31791669		68.00000000	0.50500000	4.53454867	1.474493
69	0.37934855	8.99795720	3.41336202		69.00000000	0.49768116	4.47811377	1.495983
70	0.38944674	8.98969940	3.50100912		70.00000000	0.49057143	4.41008968	1.517356
71	0.39931273	9.00042340	3.59398364		71.00000000	0.48366197	4.35316253	1.538701
72	0.40945336	8.99082760	3.68132457		72.00000000	0.47694444	4.28812527	1.560092
73	0.41928437	8.99540040	3.77163079		73.00000000	0.47041096	4.23153493	1.581574
74	0.42940861	8.99076270	3.86071091		74.00000000	0.46405405	4.17219988	1.602965
75	0.43923813	8.97526550	3.94227883		75.00000000	0.45786667	4.10947490	1.624326
76	0.44936758	8.99703410	4.04297544		76.00000000	0.45184211	4.06523883	1.645710
77	0.45951045	8.98465920	4.12854479		77.00000000	0.44597403	4.00692464	1.667177
78	0.46933326	8.95665550	4.20365632		78.00000000	0.44025641	3.94322500	1.688552
79	0.47950366	8.97313400	4.30265059		79.00000000	0.43468354	3.90047369	1.709898
80	0.48932797	8.96934890	4.38895329		80.00000000	0.42925000	3.85009302	1.731282
81	0.49946859	8.93800450	4.46425251		81.00000000	0.42395062	3.78927253	1.752766
82	0.50927728	8.92337040	4.54446981		82.00000000	0.41878049	3.73693341	1.774139
83	0.51944023	8.89244940	4.61909596		83.00000000	0.41373494	3.67911702	1.795492
84	0.52917749	8.86510850	4.69121586		84.00000000	0.40880952	3.62414078	1.816874
85	0.53932482	8.79754540	4.74473459		85.00000000	0.40400000	3.55420834	1.838364
86	0.54947209	8.71421050	4.78821546		86.00000000	0.39930233	3.47960452	1.859757
87	0.55930459	8.62714390	4.82520118		87.00000000	0.39471264	3.40524278	1.881105
88	0.56940430	8.45564940	4.81468313		88.00000000	0.39022727	3.29962500	1.902477
89	0.57921004	8.24946400	4.77817237		89.00000000	0.38584270	3.18299544	1.923967
90	0.58937520	7.96143720	4.69227364		90.00000000	0.38155556	3.03773059	1.945350
91	0.59917051	7.57450490	4.53841996		91.00000000	0.37736264	2.85833515	1.966735
92	0.60927463	7.05068920	4.29580605		92.00000000	0.37326087	2.63174638	1.988195
93	0.61910343	6.41012720	3.96853174		93.00000000	0.36924731	2.36692224	2.009708
94	0.62920755	5.54450940	3.48864718		94.00000000	0.36531915	2.02551546	2.031097
95	0.63934374	4.47465320	2.86084151		95.00000000	0.36147368	1.61746938	2.052490
96	0.64910328	3.19148420	2.07160286		96.00000000	0.35770833	1.14162049	2.073827
97	0.65924764	1.59944360	1.05442942		97.00000000	0.35402062	0.56623601	2.095293
98	0.66896033	-0.23032799	-0.15408029		98.00000000	0.35040816	-0.08070881	2.116688
99	0.67904139	-2.43446710	-1.65310392		99.00000000	0.34686869	-0.84444041	2.138072
100	0.68876076	-4.91140940	-3.38278607		100.00000000	0.34340000	-1.68657799	2.159593
101	0.69902343	-7.86009980	-5.49439392		101.00000000	0.34000000	-2.67243393	2.180975
17:16 02/04/2018
Test Lot:	JK-PERC
Recipe:	Recipe_YJX-LID
Cell Name:	1-20-3h
Test Order:	3
Test Condition:	Light
1	-0.30000752	9.01116090	-2.70341603		1.00000000	34.34000000	309.44326531	0.000000
2	-0.29010254	8.98726940	-2.60722968		2.00000000	17.17000000	154.31141560	0.021599
3	-0.28001669	9.00257300	-2.52087069		3.00000000	11.44666667	103.04945227	0.043002
4	-0.27021667	8.99518490	-2.43064891		4.00000000	8.58500000	77.22366237	0.064357
5	-0.26006013	8.99328230	-2.33879416		5.00000000	6.86800000	61.76586284	0.085734
6	-0.24994080	8.99865820	-2.24913183		6.00000000	5.72333333	51.50232043	0.107216
7	-0.24008122	9.00154690	-2.16110236		7.00000000	4.90571429	44.15901722	0.128597
8	-0.22992170	8.99928190	-2.06913019		8.00000000	4.29250000	38.62941756	0.150002
9	-0.22012241	8.98757650	-1.97836700		9.00000000	3.81555556	34.29259745	0.171390
10	-0.20996363	9.00253110	-1.89020411		10.00000000	3.43400000	30.91469180	0.192875
11	-0.20015095	8.98394490	-1.79814511		11.00000000	3.12181818	28.04624253	0.214256
12	-0.19002195	8.99204060	-1.70868509		12.00000000	2.86166667	25.73222285	0.235640
13	-0.18019885	8.99561880	-1.62100016		13.00000000	2.64153846	23.76227305	0.257000
14	-0.17005719	8.99592110	-1.52982106		14.00000000	2.45285714	22.06570933	0.278519
15	-0.16025940	8.99465750	-1.44147841		15.00000000	2.28933333	20.59176924	0.299896
16	-0.15011029	8.98418900	-1.34861922		16.00000000	2.14625000	19.28231564	0.321279
17	-0.13992025	8.99747940	-1.25892957		17.00000000	2.02000000	18.17490839	0.342652
18	-0.13010162	9.00345900	-1.17136460		18.00000000	1.90777778	17.17659900	0.364140
19	-0.11993912	8.99334240	-1.07865357		19.00000000	1.80736842	16.25428305	0.385520
20	-0.11011825	8.99214270	-0.99019902		20.00000000	1.71700000	15.43950902	0.406946
21	-0.09998850	8.99769500	-0.89966601		21.00000000	1.63523810	14.71337363	0.428442
22	-0.09019889	8.98975090	-0.81086554		22.00000000	1.56090909	14.03218390	0.449812
23	-0.08002448	8.99956420	-0.72018545		23.00000000	1.49304348	13.43674064	0.471205
24	-0.07020064	8.99002650	-0.63110559		24.00000000	1.43083333	12.86322958	0.492578
25	-0.06002846	8.99969580	-0.54023788		25.00000000	1.37360000	12.36198215	0.514049
26	-0.04989053	9.00186060	-0.44910756		26.00000000	1.32076923	11.88938050	0.535444
27	-0.04007040	8.98134330	-0.35988602		27.00000000	1.27185185	11.42293811	0.556793
28	-0.02992353	9.00526810	-0.26946941		28.00000000	1.22642857	11.04431809	0.578163
29	-0.02011159	8.98794170	-0.18076182		29.00000000	1.18413793	10.64296269	0.599646
30	-0.00997366	8.98964600	-0.08965963		30.00000000	1.14466667	10.29014812	0.621013
31	-0.00068495	8.98944760	-0.00615733		31.00000000	1.10774194	9.95798808	0.642494
32	0.00945129	8.99573230	0.08502128		32.00000000	1.07312500	9.65354522	0.663877
33	0.01924509	8.98963930	0.17300640		33.00000000	1.04060606	9.35467314	0.685376
34	0.02936859	8.99821090	0.26426480		34.00000000	1.01000000	9.08819301	0.706763
35	0.03920407	8.98163510	0.35211663		35.00000000	0.98114286	8.81226712	0.728126
36	0.04937447	8.99383640	0.44406586		36.00000000	0.95388889	8.57912061	0.749505
37	0.05919729	8.98847770	0.53209350		37.00000000	0.92810811	8.34227903	0.770977
38	0.06933866	9.00026800	0.62406650		38.00000000	0.90368421	8.13340008	0.792359
39	0.07946440	8.98322770	0.71384678		39.00000000	0.88051282	7.90984716	0.813700
40	0.08932295	8.99820420	0.80374612		40.00000000	0.85850000	7.72495831	0.835080
41	0.09942114	8.99064540	0.89386025		41.00000000	0.83756098	7.53021373	0.856567
42	0.10928342	8.99635510	0.98315245		42.00000000	0.81761905	7.35559129	0.877945
43	0.11940841	9.00091930	1.07478546		43.00000000	0.79860465	7.18817602	0.899361
44	0.12922899	8.98610970	1.16126588		44.00000000	0.78045455	7.01325016	0.920722
45	0.13941503	8.99872970	1.25455817		45.00000000	0.76311111	6.86703062	0.942190
46	0.14920734	8.98331740	1.34037689		46.00000000	0.74652174	6.70624173	0.963567
47	0.15934944	8.99341770	1.43309607		47.00000000	0.73063830	6.57093540	0.984944
48	0.16950421	8.98901370	1.52367567		48.00000000	0.71541667	6.43089022	1.006313
49	0.17934564	9.01358890	1.61654787		49.00000000	0.70081633	6.31687026	1.027803
50	0.18948403	8.98738770	1.70296644		50.00000000	0.68680000	6.17253787	1.049176
51	0.19926518	8.98782160	1.79095989		51.00000000	0.67333333	6.05179988	1.070567
52	0.20941772	9.00114920	1.88500014		52.00000000	0.66038462	5.94422045	1.092048
53	0.21923086	8.98520850	1.96983499		53.00000000	0.64792453	5.82173698	1.113421
54	0.22940423	8.99136640	2.06265749		54.00000000	0.63592593	5.71784300	1.134794
55	0.23920026	8.99782180	2.15228131		55.00000000	0.62436364	5.61791274	1.156170
56	0.24936396	8.99750610	2.24365375		56.00000000	0.61321429	5.51739928	1.177650
57	0.25950608	8.97928050	2.33017788		57.00000000	0.60245614	5.40962267	1.199040
58	0.26931846	8.99576570	2.42272576		58.00000000	0.59206897	5.32611369	1.220385
59	0.27946952	8.98797510	2.51186509		59.00000000	0.58203390	5.23130619	1.241773
60	0.28927895	8.99032880	2.60071288		60.00000000	0.57233333	5.14546485	1.263252
61	0.29943892	8.98218920	2.68961703		61.00000000	0.56295082	5.05653077	1.284627
62	0.30928555	9.00840090	2.78616823		62.00000000	0.55387097	4.98949172	1.305984
63	0.31938526	8.98254970	2.86889397		63.00000000	0.54507937	4.89620249	1.327361
64	0.32921255	8.97770020	2.95557158		64.00000000	0.53656250	4.81709726	1.348838
65	0.33938295	9.00022790	3.05452390		65.00000000	0.52830769	4.75488963	1.370221
66	0.34918866	8.98643680	3.13796182		66.00000000	0.52030303	4.67567030	1.391576
67	0.35935310	8.98698900	3.22950236		67.00000000	0.51253731	4.60616720	1.412952
68	0.36950040	8.98938750	3.32158228		68.00000000	0.50500000	4.53964069	1.434442
69	0.37932321	8.98534870	3.40835131		69.00000000	0.49768116	4.47183876	1.455817
70	0.38945121	8.99507140	3.50314144		70.00000000	0.49057143	4.41272503	1.477174
71	0.39930975	8.97196580	3.58259342		71.00000000	0.48366197	4.33939867	1.498559
72	0.40942806	8.98861600	3.68019161		72.00000000	0.47694444	4.28707046	1.520042
73	0.41925460	8.98651500	3.76763775		73.00000000	0.47041096	4.22735514	1.541438
74	0.42945322	8.98316670	3.85784987		74.00000000	0.46405405	4.16867493	1.562802
75	0.43925878	8.97795010	3.94364341		75.00000000	0.45786667	4.11070409	1.624475
76	0.44942829	8.99085520	4.04074468		76.00000000	0.45184211	4.06244694	1.645906
77	0.45956203	8.96308990	4.11909579		77.00000000	0.44597403	3.99730529	1.667286
78	0.46943012	8.97511290	4.21318833		78.00000000	0.44025641	3.95135099	1.688769
79	0.47955421	8.97112560	4.30214105		79.00000000	0.43468354	3.89960067	1.710152
80	0.48937091	8.96742250	4.38839571		80.00000000	0.42925000	3.84926611	1.731546
81	0.49953222	8.94479370	4.46821265		81.00000000	0.42395062	3.79215081	1.752887
82	0.50932366	8.92665000	4.54655405		82.00000000	0.41878049	3.73830684	1.774367
83	0.51949388	8.90386770	4.62550478		83.00000000	0.41373494	3.68384117	1.795749
84	0.52925771	8.86324210	4.69093922		84.00000000	0.40880952	3.62337778	1.817137
85	0.53937960	8.80848880	4.75111917		85.00000000	0.40400000	3.55862948	1.838624
86	0.54957217	8.72618770	4.79566991		86.00000000	0.39930233	3.48438704	1.860011
87	0.55936801	8.61370470	4.81823086		87.00000000	0.39471264	3.39993815	1.881360
88	0.56950778	8.45992280	4.81799185		88.00000000	0.39022727	3.30129260	1.902744
89	0.57932895	8.25321200	4.78132464		89.00000000	0.38584270	3.18444157	1.924225
90	0.58942324	7.96635150	4.69555271		90.00000000	0.38155556	3.03960567	1.945600
91	0.59923553	7.59226610	4.54955560		91.00000000	0.37736264	2.86503756	1.966949
92	0.60938042	7.06964780	4.30810495		92.00000000	0.37326087	2.63882289	1.988425
93	0.61915922	6.42006680	3.97504355		93.00000000	0.36924731	2.37059241	2.009936
94	0.62923414	5.57106450	3.50550398		94.00000000	0.36531915	2.03521654	2.031338
95	0.63936496	4.49567320	2.87437592		95.00000000	0.36147368	1.62506755	2.052679
96	0.64916974	3.21422000	2.08657436		96.00000000	0.35770833	1.14975328	2.074053
97	0.65926260	1.60626960	1.05895347		97.00000000	0.35402062	0.56865256	2.095534
98	0.66898328	-0.25006402	-0.16728865		98.00000000	0.35040816	-0.08762447	2.116910
99	0.67909026	-2.49721170	-1.69583214		99.00000000	0.34686869	-0.86620454	2.138322
100	0.68882585	-5.02512450	-3.46143566		100.00000000	0.34340000	-1.72562775	2.159714
101	0.69905859	-8.03662780	-5.61807370		101.00000000	0.34000000	-2.73245345	2.181193
17:16 02/04/2018
Test Lot:	JK-PERC
Recipe:	Recipe_YJX-LID
Cell Name:	1-20-3h
Test Order:	4
Test Condition:	Light
1	-0.29985911	8.99884410	-2.69838538		1.00000000	34.34000000	309.02030639	0.000000
2	-0.29005253	8.98795510	-2.60697912		2.00000000	17.17000000	154.32318907	0.021600
3	-0.27994379	8.99841210	-2.51904959		3.00000000	11.44666667	103.00182384	0.042989
4	-0.27012828	8.99555300	-2.42995326		4.00000000	8.58500000	77.22682251	0.064418
5	-0.26000538	8.99268630	-2.33814682		5.00000000	6.86800000	61.76176951	0.085801
6	-0.24985346	8.99931340	-2.24850959		6.00000000	5.72333333	51.50607036	0.107281
7	-0.24002828	8.99560830	-2.15920039		7.00000000	4.90571429	44.12988415	0.128675
8	-0.22986148	8.99241450	-2.06700971		8.00000000	4.29250000	38.59993924	0.150069
9	-0.22004375	8.99186990	-1.97860477		9.00000000	3.81555556	34.30897915	0.171417
10	-0.20988736	9.00440980	-1.88991180		10.00000000	3.43400000	30.92114325	0.192896
11	-0.20006515	8.99730210	-1.80004659		11.00000000	3.12181818	28.08794128	0.214271
12	-0.18989612	8.99034120	-1.70723091		12.00000000	2.86166667	25.72735973	0.235652
13	-0.18012154	9.00563530	-1.62210890		13.00000000	2.64153846	23.78873202	0.257062
14	-0.16999270	8.97904780	-1.52637258		14.00000000	2.45285714	22.02432153	0.278530
15	-0.16013627	9.00555130	-1.44211539		15.00000000	2.28933333	20.61670878	0.299916
16	-0.14998955	8.98823360	-1.34814111		16.00000000	2.14625000	19.29099636	0.321282
17	-0.13983987	8.99009130	-1.25717320		17.00000000	2.02000000	18.15998443	0.342649
18	-0.13004892	9.00252440	-1.17076858		18.00000000	1.90777778	17.17481599	0.364135
19	-0.11988733	8.99537940	-1.07843202		19.00000000	1.80736842	16.25796466	0.385518
20	-0.11004503	8.99538610	-0.98989753		20.00000000	1.71700000	15.44507793	0.406876
21	-0.09993926	9.00414940	-0.89986800		21.00000000	1.63523810	14.72392811	0.428251
22	-0.09010812	8.99402620	-0.81043478		22.00000000	1.56090909	14.03885726	0.449742
23	-0.07998151	9.00513460	-0.72024423		23.00000000	1.49304348	13.44505749	0.471116
24	-0.07012135	8.99360280	-0.63064355		24.00000000	1.43083333	12.86834667	0.492513
25	-0.05996868	8.98695370	-0.53893579		25.00000000	1.37360000	12.34447960	0.513863
26	-0.04980039	8.99657630	-0.44803303		26.00000000	1.32076923	11.88240116	0.535383
27	-0.03999382	8.98767090	-0.35945125		27.00000000	1.27185185	11.43098588	0.556778
28	-0.02987018	9.00470070	-0.26897203		28.00000000	1.22642857	11.04362222	0.578163
29	-0.02011050	8.99171830	-0.18082791		29.00000000	1.18413793	10.64743470	0.599652
30	-0.00993104	8.98759460	-0.08925616		30.00000000	1.14466667	10.28779995	0.621035
31	-0.00062760	8.99917790	-0.00564785		31.00000000	1.10774194	9.96876674	0.642504
32	0.00948020	8.98204710	0.08515163		32.00000000	1.07312500	9.63885929	0.663926
33	0.01931552	8.98333070	0.17351774		33.00000000	1.04060606	9.34810837	0.685417
34	0.02945748	8.99295810	0.26490985		34.00000000	1.01000000	9.08288768	0.706795
35	0.03927345	8.99944500	0.35343924		35.00000000	0.98114286	8.82974118	0.728154
36	0.04940721	8.99325180	0.44433152		36.00000000	0.95388889	8.57856297	0.749535
37	0.05921648	8.98952010	0.53232777		37.00000000	0.92810811	8.34324649	0.771020
38	0.06941500	8.99345590	0.62428077		38.00000000	0.90368421	8.12724409	0.792415
39	0.07953835	8.99979590	0.71582894		39.00000000	0.88051282	7.92443567	0.813784
40	0.08937367	8.99553300	0.80396381		40.00000000	0.85850000	7.72266508	0.835163
41	0.09951339	8.99443150	0.89506636		41.00000000	0.83756098	7.53338482	0.856647
42	0.10933234	8.99572660	0.98352384		42.00000000	0.81761905	7.35507742	0.878029
43	0.11945196	8.99478910	1.07444519		43.00000000	0.79860465	7.18328041	0.899403
44	0.12927984	8.98972700	1.16219047		44.00000000	0.78045455	7.01607330	0.920785
45	0.13949026	8.99967580	1.25536712		45.00000000	0.76311111	6.86775260	0.942272
46	0.14929284	8.97973060	1.34060948		46.00000000	0.74652174	6.70356410	0.963663
47	0.15945712	8.99630740	1.43452527		47.00000000	0.73063830	6.57304673	0.985011
48	0.16956633	8.99574180	1.52537492		48.00000000	0.71541667	6.43570361	1.006386
49	0.17941132	8.98406980	1.61184382		49.00000000	0.70081633	6.29618279	1.027868
50	0.18953466	8.99733920	1.70530763		50.00000000	0.68680000	6.17937256	1.049250
51	0.19934542	8.98930640	1.79197706		51.00000000	0.67333333	6.05279964	1.070611
52	0.20947324	8.99679850	1.88458853		52.00000000	0.66038462	5.94134732	1.091980
53	0.21930484	8.97667120	1.96862744		53.00000000	0.64792453	5.81620545	1.113468
54	0.22942150	8.99709030	2.06412595		54.00000000	0.63592593	5.72148298	1.134853
55	0.23929551	8.99874110	2.15335834		55.00000000	0.62436364	5.61848672	1.156240
56	0.24941738	9.00311180	2.24553256		56.00000000	0.61321429	5.52083677	1.177587
57	0.25956675	8.98940180	2.33334981		57.00000000	0.60245614	5.41572031	1.199054
58	0.26935297	8.99669170	2.42328563		58.00000000	0.59206897	5.32666195	1.220426
59	0.27952170	8.98588850	2.51175083		59.00000000	0.58203390	5.23009171	1.241814
60	0.28936300	9.00005910	2.60428410		60.00000000	0.57233333	5.15103382	1.263302
61	0.29949155	8.99268150	2.69323212		61.00000000	0.56295082	5.06243742	1.284676
62	0.30931422	8.96790310	2.77389995		62.00000000	0.55387097	4.96706117	1.306027
63	0.31946063	9.01776600	2.88082121		63.00000000	0.54507937	4.91539817	1.327418
64	0.32928032	8.98587040	2.95887028		64.00000000	0.53656250	4.82148109	1.348893
65	0.33939326	9.00097560	3.05487045		65.00000000	0.52830769	4.75528465	1.370269
66	0.34924272	8.98583890	3.13823882		66.00000000	0.52030303	4.67535921	1.391635
67	0.35940030	8.99911310	3.23428395		67.00000000	0.51253731	4.61238125	1.413015
68	0.36953852	8.98791310	3.32138010		68.00000000	0.50500000	4.53889612	1.434496
69	0.37939319	8.98928830	3.41047476		69.00000000	0.49768116	4.47379942	1.455881
70	0.38952249	8.99549480	3.50394753		70.00000000	0.49057143	4.41293273	1.477221
71	0.39935634	8.99312020	3.59145957		71.00000000	0.48366197	4.34963025	1.498594
72	0.40947521	8.98111720	3.67754485		72.00000000	0.47694444	4.28349395	1.520078
73	0.41930905	8.98588370	3.76786236		73.00000000	0.47041096	4.22705817	1.541453
74	0.42947409	8.98995400	3.86095231		74.00000000	0.46405405	4.17182460	1.562816
75	0.43925804	8.98167130	3.94527133		75.00000000	0.45786667	4.11240790	1.584194
76	0.44945508	8.97941680	4.03584450		76.00000000	0.45184211	4.05727859	1.605690
77	0.45960224	8.97896770	4.12675367		77.00000000	0.44597403	4.00438637	1.627068
78	0.46945542	8.97135930	4.21165325		78.00000000	0.44025641	3.94969844	1.648429
79	0.47956610	8.96281340	4.29826147		79.00000000	0.43468354	3.89598750	1.669800
80	0.48941854	8.94718740	4.37891939		80.00000000	0.42925000	3.84058019	1.691285
81	0.49952477	8.93311690	4.46231316		81.00000000	0.42395062	3.78720042	1.712671
82	0.50935268	8.92975430	4.54839428		82.00000000	0.41878049	3.73960686	1.734034
83	0.51949459	8.88819690	4.61737020		83.00000000	0.41373494	3.67735761	1.755418
84	0.52925253	8.87084200	4.69491557		84.00000000	0.40880952	3.62648469	1.776914
85	0.53942651	8.81326200	4.75410716		85.00000000	0.40400000	3.56055785	1.798290
86	0.54955953	8.73574730	4.80081318		86.00000000	0.39930233	3.48820421	1.819680
87	0.55934495	8.62149330	4.82238874		87.00000000	0.39471264	3.40301241	1.841025
88	0.56950551	8.47227100	4.82500502		88.00000000	0.39022727	3.30611121	1.862491
89	0.57930958	8.26180550	4.78614307		89.00000000	0.38584270	3.18775731	1.883873
90	0.58942920	7.97810550	4.70252834		90.00000000	0.38155556	3.04409048	1.905244
91	0.59923553	7.60231780	4.55557894		91.00000000	0.37736264	2.86883070	1.926730
92	0.60936332	7.09166720	4.32140187		92.00000000	0.37326087	2.64704187	1.948107
93	0.61916888	6.42689180	3.97933140		93.00000000	0.36924731	2.37311252	1.969447
94	0.62926394	5.59066960	3.51800678		94.00000000	0.36531915	2.04237866	1.990920
95	0.63938951	4.50969700	2.88345296		95.00000000	0.36147368	1.63013679	2.012431
96	0.64914519	3.22000580	2.09025128		96.00000000	0.35770833	1.15182291	2.033820
97	0.65927374	1.59533000	1.05175918		97.00000000	0.35402062	0.56477971	2.055237
98	0.66900116	-0.27052730	-0.18098308		98.00000000	0.35040816	-0.09479497	2.076634
99	0.67909551	-2.54332330	-1.72715943		99.00000000	0.34686869	-0.88219921	2.098119
100	0.68879831	-5.11109640	-3.52051456		100.00000000	0.34340000	-1.75515050	2.119500
101	0.69907427	-8.17558960	-5.71534433		101.00000000	0.34000000	-2.77970046	2.140860
17:18 02/04/2018
Test Lot:	JK-PERC
Recipe:	Recipe_YJX-LID
Cell Name:	1-20-3h
Test Order:	5
Test Condition:	Light
1	-0.29993072	8.84526250	-2.65296595		1.00000000	34.34000000	303.74631425	0.000000
2	-0.29010758	8.84828000	-2.56695310		2.00000000	17.17000000	151.92496760	0.061779
3	-0.27998152	8.84360220	-2.47604519		3.00000000	11.44666667	101.22976652	0.083250
4	-0.27017772	8.85354710	-2.39203117		4.00000000	8.58500000	76.00770185	0.104751
5	-0.25999880	8.84276960	-2.29910948		5.00000000	6.86800000	60.73214161	0.126150
6	-0.24985933	8.84471230	-2.20993389		6.00000000	5.72333333	50.62123673	0.147502
7	-0.24002948	8.83087250	-2.11966973		7.00000000	4.90571429	43.32173738	0.168884
8	-0.22988480	8.85275080	-2.03511285		8.00000000	4.29250000	38.00043281	0.190384
9	-0.22006910	8.83545490	-1.94441061		9.00000000	3.81555556	33.71216903	0.211763
10	-0.20990953	8.83840370	-1.85526517		10.00000000	3.43400000	30.35107831	0.233116
11	-0.20012434	8.85125730	-1.77135203		11.00000000	3.12181818	27.63201597	0.254487
12	-0.18997742	8.84222410	-1.67982292		12.00000000	2.86166667	25.30349797	0.275973
13	-0.18017362	8.84011270	-1.59275511		13.00000000	2.64153846	23.35149770	0.297356
14	-0.17004161	8.85101220	-1.50504036		14.00000000	2.45285714	21.71026850	0.318718
15	-0.16022292	8.83417130	-1.41543672		15.00000000	2.28933333	20.22436283	0.340100
16	-0.15006931	8.84952160	-1.32804160		16.00000000	2.14625000	18.99328573	0.361586
17	-0.13993950	8.84696670	-1.23804010		17.00000000	2.02000000	17.87087273	0.382955
18	-0.13011263	8.85493370	-1.15213871		18.00000000	1.90777778	16.89324574	0.404320
19	-0.11996572	8.83518120	-1.05991887		19.00000000	1.80736842	15.96842750	0.425691
20	-0.11016788	8.85929110	-0.97600932		20.00000000	1.71700000	15.21140282	0.447170
21	-0.09998301	8.84283450	-0.88413318		21.00000000	1.63523810	14.46013984	0.468569
22	-0.09015614	8.85403920	-0.79824598		22.00000000	1.56090909	13.82035028	0.489946
23	-0.07999881	8.84232230	-0.70737523		23.00000000	1.49304348	13.20197164	0.511290
24	-0.07017789	8.85542490	-0.62145503		24.00000000	1.43083333	12.67063713	0.532764
25	-0.06003321	8.84238910	-0.53083700		25.00000000	1.37360000	12.14590567	0.554146
26	-0.04989448	8.83769610	-0.44095227		26.00000000	1.32076923	11.67255708	0.575536
27	-0.04004082	8.84142300	-0.35401784		27.00000000	1.27185185	11.24498022	0.597025
28	-0.02987976	8.84202860	-0.26419773		28.00000000	1.22642857	10.84411650	0.618417
29	-0.02009606	8.84464360	-0.17774252		29.00000000	1.18413793	10.47327797	0.639768
30	-0.00995808	8.84994220	-0.08812844		30.00000000	1.14466667	10.13023384	0.661155
31	-0.00070655	8.83230590	-0.00624045		31.00000000	1.10774194	9.78391563	0.682786
32	0.00946472	8.85248370	0.08378629		32.00000000	1.07312500	9.49982157	0.704167
33	0.01925707	8.84216880	0.17027430		33.00000000	1.04060606	9.20121444	0.725534
34	0.02945431	8.84528920	0.26053188		34.00000000	1.01000000	8.93374209	0.746902
35	0.03926229	8.84225750	0.34716729		35.00000000	0.98114286	8.67551779	0.768416
36	0.04938138	8.85770230	0.43740555		36.00000000	0.95388889	8.44926381	0.789804
37	0.05924444	8.83130930	0.52320593		37.00000000	0.92810811	8.19640977	0.811164
38	0.06936129	8.86185650	0.61466982		38.00000000	0.90368421	8.00831980	0.832541
39	0.07950122	8.83581350	0.70245794		39.00000000	0.88051282	7.78004707	0.854026
40	0.08935013	8.85421470	0.79112527		40.00000000	0.85850000	7.60134332	0.875405
41	0.09947294	8.84064670	0.87940512		41.00000000	0.83756098	7.40458068	0.896759
42	0.10932558	8.85074140	0.96761244		42.00000000	0.81761905	7.23653475	0.918132
43	0.11943053	8.83510300	1.05518103		43.00000000	0.79860465	7.05575435	0.939620
44	0.12927647	8.84420300	1.14334734		44.00000000	0.78045455	6.90249843	0.961005
45	0.13940449	8.84025760	1.23237160		45.00000000	0.76311111	6.74609880	0.982359
46	0.14922290	8.84009080	1.31914399		46.00000000	0.74652174	6.59931996	1.003731
47	0.15940523	8.84662630	1.41019850		47.00000000	0.73063830	6.46368398	1.025227
48	0.16953176	8.84181500	1.49896846		48.00000000	0.71541667	6.32558181	1.046601
49	0.17933528	8.83116440	1.58373934		49.00000000	0.70081633	6.18902419	1.067985
50	0.18948415	8.84525300	1.67603525		50.00000000	0.68680000	6.07491976	1.089360
51	0.19923854	8.84201340	1.76166984		51.00000000	0.67333333	5.95362236	1.110840
52	0.20940675	8.84775450	1.85277951		52.00000000	0.66038462	5.84292095	1.132223
53	0.21924524	8.83819870	1.93773300		53.00000000	0.64792453	5.72648572	1.153610
54	0.22938219	8.84421830	2.02870616		54.00000000	0.63592593	5.62426771	1.174952
55	0.23919836	8.84004780	2.11452494		55.00000000	0.62436364	5.51940439	1.196429
56	0.24934350	8.84562680	2.20559955		56.00000000	0.61321429	5.42426472	1.217803
57	0.25950798	8.83973220	2.29398105		57.00000000	0.60245614	5.32555094	1.239182
58	0.26933309	8.83196540	2.37874053		58.00000000	0.59206897	5.22913262	1.260664
59	0.27948195	8.83748630	2.46991790		59.00000000	0.58203390	5.14371660	1.282044
60	0.28931895	8.84382630	2.55868654		60.00000000	0.57233333	5.06161659	1.303397
61	0.29947153	8.84579660	2.64906424		61.00000000	0.56295082	4.97974845	1.324777
62	0.30929664	8.84391980	2.73539468		62.00000000	0.55387097	4.89839042	1.346268
63	0.31940827	8.83972360	2.82348082		63.00000000	0.54507937	4.81835093	1.367655
64	0.32922593	8.84376240	2.91159590		64.00000000	0.53656250	4.74523126	1.389005
65	0.33938968	8.83789160	2.99948920		65.00000000	0.52830769	4.66912612	1.410381
66	0.34920287	8.83800320	3.08625608		66.00000000	0.52030303	4.59843985	1.431859
67	0.35934874	8.83886240	3.17623407		67.00000000	0.51253731	4.53024679	1.453241
68	0.36951101	8.84331890	3.26770370		68.00000000	0.50500000	4.46587604	1.474594
69	0.37931898	8.82977390	3.34930083		69.00000000	0.49768116	4.39441211	1.495977
70	0.38949537	8.84386920	3.44464611		70.00000000	0.49057143	4.33854955	1.517464
71	0.39931601	8.83571720	3.52824334		71.00000000	0.48366197	4.27350040	1.538837
72	0.40943733	8.82883930	3.61485639		72.00000000	0.47694444	4.21086586	1.560201
73	0.41929370	8.83997440	3.70654557		73.00000000	0.47041096	4.15842083	1.581580
74	0.42944479	8.82741070	3.79088553		74.00000000	0.46405405	4.09639572	1.603060
75	0.43925798	8.82556340	3.87669915		75.00000000	0.45786667	4.04093130	1.624441
76	0.44938973	8.82590770	3.96627228		76.00000000	0.45184211	3.98791672	1.645790
77	0.45950955	8.79908560	4.04326386		77.00000000	0.44597403	3.92416363	1.667171
78	0.46939197	8.81310080	4.13679875		78.00000000	0.44025641	3.88002412	1.688656
79	0.47952518	8.78240010	4.21138199		79.00000000	0.43468354	3.81756480	1.710032
80	0.48933989	8.77773090	4.29529387		80.00000000	0.42925000	3.76784099	1.731413
81	0.49948353	8.75101090	4.37098582		81.00000000	0.42395062	3.70999647	1.752775
82	0.50929594	8.71963410	4.44087425		82.00000000	0.41878049	3.65161262	1.774270
83	0.51943290	8.66586020	4.50133289		83.00000000	0.41373494	3.58536915	1.795659
84	0.52919775	8.60902400	4.55587613		84.00000000	0.40880952	3.51945100	1.817047
85	0.53935999	8.53418730	4.60299918		85.00000000	0.40400000	3.44781167	1.838399
86	0.54948801	8.37782670	4.60351532		86.00000000	0.39930233	3.34528568	1.859880
87	0.55929375	8.22677990	4.60118658		87.00000000	0.39471264	3.24721404	1.881263
88	0.56944263	7.97875450	4.54344295		88.00000000	0.39022727	3.11352761	1.902642
89	0.57921857	7.64099120	4.42580400		89.00000000	0.38584270	2.94822065	1.924124
90	0.58934659	7.20080090	4.24376746		90.00000000	0.38155556	2.74750559	1.945507
91	0.59912556	6.61497830	3.96320258		91.00000000	0.37736264	2.49624566	1.966846
92	0.60927445	5.86386300	3.57270190		92.00000000	0.37326087	2.18875060	1.988320
93	0.61905414	4.93560360	3.05540584		93.00000000	0.36924731	1.82245836	2.009834
94	0.62921637	3.76297740	2.36772698		94.00000000	0.36531915	1.37468770	2.031225
95	0.63931018	2.35334990	1.50452055		95.00000000	0.36147368	0.85067406	2.052577
96	0.64908314	0.71635932	0.46497676		96.00000000	0.35770833	0.25624770	2.073961
97	0.65915608	-1.23195820	-0.81205274		97.00000000	0.35402062	-0.43613860	2.095488
98	0.66890454	-3.41691280	-2.28558848		98.00000000	0.35040816	-1.19731414	2.116874
99	0.67899239	-6.03830050	-4.09996009		99.00000000	0.34686869	-2.09449737	2.138218
100	0.68894327	-8.98594760	-6.19080812		100.00000000	0.34340000	-3.08577441	2.159605
101	0.69209373	-10.00015400	-6.92104388		101.00000000	0.34000000	-3.40005236	2.181084
