# Supplementary material for: Study on the Electrical Injection Regeneration of Industrialized B-Doped Czochralski Silicon PERC Solar Cells
Source: Hindawi journal article supplement (doi:10.1155/2019/5357370), 2019-06-20
Supplement: f1 [file 5357370.f1.zip › section3.2/IVRawData_1-20-4h.csv]

18:51 02/04/2018
Test Lot:	JK-PERC
Recipe:	Recipe_YJX-LID
Cell Name:	1-20-4h
Test Order:	2
Test Condition:	Light
1	-0.29988784	9.03875830	-2.71061370		1.00000000	34.34000000	310.39096002	0.000000
2	-0.29006693	9.03421590	-2.62052727		2.00000000	17.17000000	155.11748700	0.061786
3	-0.27991849	9.04312420	-2.53133767		3.00000000	11.44666667	103.51362834	0.083210
4	-0.27009758	9.04576780	-2.44323999		4.00000000	8.58500000	77.65791656	0.104709
5	-0.25996479	9.04025750	-2.35014864		5.00000000	6.86800000	62.08848851	0.126101
6	-0.24977173	9.03187750	-2.25590767		6.00000000	5.72333333	51.69244556	0.147509
7	-0.23993815	9.05339430	-2.17225468		7.00000000	4.90571429	44.41336575	0.168896
8	-0.22981802	9.03234670	-2.07579603		8.00000000	4.29250000	38.77134821	0.190385
9	-0.22001347	9.03518580	-1.98786258		9.00000000	3.81555556	34.47425337	0.211752
10	-0.20983529	9.04440780	-1.89783593		10.00000000	3.43400000	31.05849639	0.233088
11	-0.20002329	9.03441140	-1.80709269		11.00000000	3.12181818	28.20378977	0.254467
12	-0.18987861	9.04503350	-1.71745839		12.00000000	2.86166667	25.88387087	0.275949
13	-0.18010904	9.03056140	-1.62648574		13.00000000	2.64153846	23.85457527	0.297343
14	-0.16991819	9.04940800	-1.53765903		14.00000000	2.45285714	22.19690505	0.318691
15	-0.16009133	9.03331950	-1.44615613		15.00000000	2.28933333	20.68027944	0.340061
16	-0.14995854	9.04436780	-1.35628019		16.00000000	2.14625000	19.41147439	0.361537
17	-0.13979971	9.04169560	-1.26402642		17.00000000	2.02000000	18.26422511	0.382982
18	-0.12998176	9.03421120	-1.17428267		18.00000000	1.90777778	17.23526737	0.404374
19	-0.11984526	9.03494550	-1.08279539		19.00000000	1.80736842	16.32947518	0.425738
20	-0.11002880	9.03897380	-0.99454744		20.00000000	1.71700000	15.51991801	0.447217
21	-0.09986625	9.04401870	-0.90319222		21.00000000	1.63523810	14.78912391	0.468595
22	-0.09002076	9.03123380	-0.81299854		22.00000000	1.56090909	14.09693494	0.489992
23	-0.07989245	9.03631400	-0.72193326		23.00000000	1.49304348	13.49160969	0.511396
24	-0.07009162	9.04070470	-0.63367764		24.00000000	1.43083333	12.93574164	0.532863
25	-0.05993651	9.03748890	-0.54167553		25.00000000	1.37360000	12.41389475	0.554246
26	-0.04975535	9.03706460	-0.44964228		26.00000000	1.32076923	11.93587686	0.575607
27	-0.03997462	9.03775410	-0.36128074		27.00000000	1.27185185	11.49468429	0.596978
28	-0.02982472	9.04443650	-0.26974774		28.00000000	1.22642857	11.09235534	0.618463
29	-0.01997849	9.03565120	-0.18051863		29.00000000	1.18413793	10.69945732	0.639862
30	-0.00985315	9.03766250	-0.08904942		30.00000000	1.14466667	10.34511101	0.661234
31	-0.00061649	9.03881840	-0.00557235		31.00000000	1.10774194	10.01267819	0.682716
32	0.00951162	9.03151890	0.08590434		32.00000000	1.07312500	9.69194872	0.704197
33	0.01935384	9.03429600	0.17484836		33.00000000	1.04060606	9.40114317	0.725577
34	0.02947369	9.03100010	0.26617685		34.00000000	1.01000000	9.12131010	0.746973
35	0.03931740	9.03709980	0.35531526		35.00000000	0.98114286	8.86668592	0.768315
36	0.04945287	9.03764250	0.44693737		36.00000000	0.95388889	8.62090676	0.789784
37	0.05928691	9.02516750	0.53507430		37.00000000	0.92810811	8.37633113	0.811151
38	0.06942536	9.04685120	0.62808089		38.00000000	0.90368421	8.17549658	0.832525
39	0.07958464	9.02624030	0.71835011		39.00000000	0.88051282	7.94772031	0.854008
40	0.08940082	9.04619980	0.80873768		40.00000000	0.85850000	7.76616253	0.875400
41	0.09953927	9.03149410	0.89898835		41.00000000	0.83756098	7.56442701	0.896798
42	0.10936736	9.04320810	0.98903180		42.00000000	0.81761905	7.39389919	0.918175
43	0.11951622	9.02747730	1.07892996		43.00000000	0.79860465	7.20938536	0.939642
44	0.12933537	9.03773210	1.16889843		44.00000000	0.78045455	7.05353910	0.961025
45	0.13948128	9.03576470	1.26032003		45.00000000	0.76311111	6.89529244	0.982375
46	0.14929745	9.02992340	1.34814454		46.00000000	0.74652174	6.74103412	1.003744
47	0.15944184	9.03667070	1.44082340		47.00000000	0.73063830	6.60253770	1.025238
48	0.16961974	9.03147600	1.53191661		48.00000000	0.71541667	6.46126846	1.046603
49	0.17945230	9.03581330	1.62149748		49.00000000	0.70081633	6.33244548	1.067950
50	0.18957958	9.04125500	1.71403733		50.00000000	0.68680000	6.20953393	1.089333
51	0.19935036	9.03627680	1.80138503		51.00000000	0.67333333	6.08442638	1.110812
52	0.20951337	9.03928760	1.89385161		52.00000000	0.66038462	5.96940647	1.132204
53	0.21931614	9.03541560	1.98161247		53.00000000	0.64792453	5.85426739	1.153562
54	0.22946799	9.03216170	2.07259199		54.00000000	0.63592593	5.74378579	1.174943
55	0.23929682	9.04718970	2.16496373		55.00000000	0.62436364	5.64873626	1.196425
56	0.24940327	9.03224850	2.25267231		56.00000000	0.61321429	5.53870381	1.217800
57	0.25957000	9.03668790	2.34565308		57.00000000	0.60245614	5.44420811	1.239164
58	0.26941669	9.03079800	2.43304771		58.00000000	0.59206897	5.34685523	1.260536
59	0.27955514	9.03644560	2.52618481		59.00000000	0.58203390	5.25951766	1.282013
60	0.28938025	9.03272720	2.61389286		60.00000000	0.57233333	5.16973087	1.303393
61	0.29952091	9.03161910	2.70515877		61.00000000	0.56295082	5.08435738	1.324772
62	0.30933636	9.04223350	2.79709160		62.00000000	0.55387097	5.00823062	1.346126
63	0.31948969	9.02612500	2.88375388		63.00000000	0.54507937	4.91995448	1.367615
64	0.32930958	9.04283710	2.97789289		64.00000000	0.53656250	4.85204728	1.389009
65	0.33946291	9.02635860	3.06411396		65.00000000	0.52830769	4.76869468	1.410383
66	0.34928507	9.03868010	3.15707601		66.00000000	0.52030303	4.70285265	1.431722
67	0.35942054	9.03034110	3.24569007		67.00000000	0.51253731	4.62838677	1.453190
68	0.36959469	9.03936960	3.34090301		68.00000000	0.50500000	4.56488165	1.474569
69	0.37941831	9.03519540	3.42811857		69.00000000	0.49768116	4.49664652	1.496008
70	0.38953370	9.02878860	3.51701743		70.00000000	0.49057143	4.42926572	1.517485
71	0.39936921	9.03913400	3.60995180		71.00000000	0.48366197	4.37188537	1.538861
72	0.40952256	9.03073980	3.69829168		72.00000000	0.47694444	4.30716118	1.560215
73	0.41932830	9.01534460	3.78038913		73.00000000	0.47041096	4.24091690	1.581586
74	0.42951143	9.03514860	3.88069960		74.00000000	0.46405405	4.19279734	1.603057
75	0.43931121	9.02584840	3.96515638		75.00000000	0.45786667	4.13263512	1.624447
76	0.44945934	9.02356720	4.05572656		76.00000000	0.45184211	4.07722760	1.645798
77	0.45960745	9.01062300	4.14134946		77.00000000	0.44597403	4.01850382	1.667175
78	0.46945342	9.02509690	4.23686261		78.00000000	0.44025641	3.97335676	1.688665
79	0.47960898	9.00799470	4.32031515		79.00000000	0.43468354	3.91562706	1.710043
80	0.48943335	9.00549980	4.40759194		80.00000000	0.42925000	3.86561079	1.731391
81	0.49957404	8.98028950	4.48631951		81.00000000	0.42395062	3.80719928	1.752777
82	0.50936192	8.97369580	4.57085892		82.00000000	0.41878049	3.75800870	1.774253
83	0.51952493	8.93252470	4.64066927		83.00000000	0.41373494	3.69569757	1.795627
84	0.52932173	8.90504360	4.71363308		84.00000000	0.40880952	3.64046663	1.816992
85	0.53944904	8.84472180	4.77127668		85.00000000	0.40400000	3.57326761	1.838366
86	0.54958230	8.77243610	4.82117561		86.00000000	0.39930233	3.50285414	1.859848
87	0.55939323	8.64477730	4.83582990		87.00000000	0.39471264	3.41220290	1.881230
88	0.56953990	8.49867630	4.84033525		88.00000000	0.39022727	3.31641527	1.902574
89	0.57933152	8.29250340	4.80410860		89.00000000	0.38584270	3.19960187	1.923958
90	0.58946025	7.99852900	4.71481490		90.00000000	0.38155556	3.05188318	1.945429
91	0.59926826	7.61692570	4.56458181		91.00000000	0.37736264	2.87434317	1.966800
92	0.60938811	7.10512830	4.32978071		92.00000000	0.37326087	2.65206637	1.988281
93	0.61917448	6.44512370	3.99065612		93.00000000	0.36924731	2.37984460	2.009664
94	0.62927794	5.60233160	3.52542369		94.00000000	0.36531915	2.04663901	2.031149
95	0.63940603	4.50710340	2.88186909		95.00000000	0.36147368	1.62919927	2.052538
96	0.64918721	3.23680810	2.10129442		96.00000000	0.35770833	1.15783323	2.073932
97	0.65927953	1.62024510	1.06819443		97.00000000	0.35402062	0.57360017	2.095273
98	0.66898257	-0.21507967	-0.14388455		98.00000000	0.35040816	-0.07536567	2.116747
99	0.67910385	-2.44622830	-1.66124306		99.00000000	0.34686869	-0.84852000	2.138166
100	0.68883222	-4.93920230	-3.40228169		100.00000000	0.34340000	-1.69612207	2.159567
101	0.69905406	-7.90847250	-5.52844981		101.00000000	0.34000000	-2.68888065	2.181067
18:51 02/04/2018
Test Lot:	JK-PERC
Recipe:	Recipe_YJX-LID
Cell Name:	1-20-4h
Test Order:	3
Test Condition:	Light
1	-0.29988009	9.04104710	-2.71123002		1.00000000	34.34000000	310.46955741	0.000000
2	-0.29004860	9.04094310	-2.62231289		2.00000000	17.17000000	155.23299303	0.061794
3	-0.27991343	9.03602030	-2.52930344		3.00000000	11.44666667	103.43231237	0.083278
4	-0.27009606	9.03504940	-2.44033124		4.00000000	8.58500000	77.56589910	0.104695
5	-0.25997800	9.03577520	-2.34910276		5.00000000	6.86800000	62.05770407	0.126170
6	-0.24981081	9.03452210	-2.25692128		6.00000000	5.72333333	51.70758149	0.147551
7	-0.23995399	9.03746030	-2.16857466		7.00000000	4.90571429	44.33519810	0.168935
8	-0.22980841	9.04101850	-2.07770209		8.00000000	4.29250000	38.80857191	0.190425
9	-0.22000815	9.02856730	-1.98635839		9.00000000	3.81555556	34.44900012	0.211801
10	-0.20984395	9.03991700	-1.89697189		10.00000000	3.43400000	31.04307498	0.233138
11	-0.20001988	9.03961850	-1.80810341		11.00000000	3.12181818	28.22004539	0.254506
12	-0.18990257	9.04021930	-1.71676088		12.00000000	2.86166667	25.87009423	0.275991
13	-0.18009637	9.03642080	-1.62742658		13.00000000	2.64153846	23.87005310	0.297367
14	-0.16995598	9.04678440	-1.53755511		14.00000000	2.45285714	22.19046974	0.318732
15	-0.16014458	9.03029440	-1.44615270		15.00000000	2.28933333	20.67335398	0.340102
16	-0.15000641	9.04052930	-1.35613734		16.00000000	2.14625000	19.40323601	0.361581
17	-0.13983551	9.03274440	-1.26309842		17.00000000	2.02000000	18.24614369	0.382967
18	-0.13000922	9.04222200	-1.17557223		18.00000000	1.90777778	17.25055019	0.404305
19	-0.11986883	9.03153420	-1.08259944		19.00000000	1.80736842	16.32330971	0.425673
20	-0.11002914	9.03810500	-0.99445492		20.00000000	1.71700000	15.51842629	0.447153
21	-0.09985600	9.03983400	-0.90268164		21.00000000	1.63523810	14.78228093	0.468529
22	-0.09004013	9.03081510	-0.81313572		22.00000000	1.56090909	14.09628139	0.489876
23	-0.07993249	9.04000760	-0.72259031		23.00000000	1.49304348	13.49712439	0.511263
24	-0.07008088	9.02402970	-0.63241198		24.00000000	1.43083333	12.91188250	0.532735
25	-0.05993306	9.04672430	-0.54219783		25.00000000	1.37360000	12.42658050	0.554117
26	-0.04977406	9.02259250	-0.44909104		26.00000000	1.32076923	11.91676256	0.575499
27	-0.03997381	9.04002380	-0.36136423		27.00000000	1.27185185	11.49757101	0.596878
28	-0.02980365	9.02493760	-0.26897610		28.00000000	1.22642857	11.06844133	0.618355
29	-0.01999001	9.03799820	-0.18066967		29.00000000	1.18413793	10.70223649	0.639734
30	-0.00986600	9.02423860	-0.08903310		30.00000000	1.14466667	10.32974512	0.661092
31	-0.00063366	9.04245850	-0.00572981		31.00000000	1.10774194	10.01671048	0.682584
32	0.00952885	9.03510090	0.08609416		32.00000000	1.07312500	9.69579265	0.704068
33	0.01934519	9.03630070	0.17480897		33.00000000	1.04060606	9.40322927	0.725436
34	0.02946669	9.04408450	0.26649919		34.00000000	1.01000000	9.13452535	0.746815
35	0.03930163	9.03136250	0.35494727		35.00000000	0.98114286	8.86105681	0.768171
36	0.04944396	9.03461550	0.44670720		36.00000000	0.95388889	8.61801934	0.789642
37	0.05924839	9.03670600	0.53541030		37.00000000	0.92810811	8.38704011	0.811021
38	0.06940784	9.02615260	0.62648578		38.00000000	0.90368421	8.15679159	0.832412
39	0.07955762	9.03148460	0.71852342		39.00000000	0.88051282	7.95233798	0.853877
40	0.08939033	9.04087350	0.80816667		40.00000000	0.85850000	7.76158990	0.875265
41	0.09951555	9.02988720	0.89861419		41.00000000	0.83756098	7.56308113	0.896608
42	0.10934380	9.03553960	0.98798023		42.00000000	0.81761905	7.38762928	0.918024
43	0.11949134	9.03326510	1.07939695		43.00000000	0.79860465	7.21400752	0.939511
44	0.12932777	9.04570290	1.16986058		44.00000000	0.78045455	7.05975995	0.960888
45	0.13947159	9.03212360	1.25972464		45.00000000	0.76311111	6.89251388	0.982252
46	0.14929314	9.03523920	1.34889923		46.00000000	0.74652174	6.74500248	1.003621
47	0.15943697	9.03413960	1.44037584		47.00000000	0.73063830	6.60068838	1.025106
48	0.16958600	9.03217510	1.53173045		48.00000000	0.71541667	6.46176860	1.046495
49	0.17939638	9.01673980	1.61757048		49.00000000	0.70081633	6.31907846	1.067848
50	0.18954690	9.04943280	1.71529193		50.00000000	0.68680000	6.21515045	1.089228
51	0.19931933	9.02902130	1.79965848		51.00000000	0.67333333	6.07954101	1.110708
52	0.20946240	9.03809640	1.89314136		52.00000000	0.66038462	5.96861981	1.132078
53	0.21928990	9.04749680	1.98402467		53.00000000	0.64792453	5.86209510	1.153414
54	0.22944713	9.01517300	2.06850557		54.00000000	0.63592593	5.73298224	1.174795
55	0.23928876	9.04072000	2.16334268		55.00000000	0.62436364	5.64469681	1.196275
56	0.24944003	9.03231530	2.25302100		56.00000000	0.61321429	5.53874478	1.217655
57	0.25960469	9.03702830	2.34605493		57.00000000	0.60245614	5.44441319	1.239009
58	0.26938456	9.03614710	2.43419851		58.00000000	0.59206897	5.35002227	1.260422
59	0.27955890	9.03785610	2.52661311		59.00000000	0.58203390	5.26033862	1.281895
60	0.28937227	9.02467250	2.61148997		60.00000000	0.57233333	5.16512089	1.303260
61	0.29951608	9.04178810	2.70816093		61.00000000	0.56295082	5.09008202	1.324630
62	0.30934879	9.02115440	2.79068320		62.00000000	0.55387097	4.99655552	1.345999
63	0.31946507	9.02888580	2.88441363		63.00000000	0.54507937	4.92145934	1.367482
64	0.32929334	9.03665920	2.97571169		64.00000000	0.53656250	4.84873245	1.388852
65	0.33944532	9.02697370	3.06416398		65.00000000	0.52830769	4.76901964	1.410251
66	0.34926912	9.04038430	3.15752707		66.00000000	0.52030303	4.70373935	1.431618
67	0.35941517	9.02805520	3.24481999		67.00000000	0.51253731	4.62721516	1.453087
68	0.36958578	9.03376100	3.33874961		68.00000000	0.50500000	4.56204931	1.474473
69	0.37939319	9.03159140	3.42652427		69.00000000	0.49768116	4.49485288	1.495850
70	0.38955265	9.02768800	3.51675978		70.00000000	0.49057143	4.42872580	1.517387
71	0.39934814	9.02337740	3.60346898		71.00000000	0.48366197	4.36426451	1.538773
72	0.40951133	9.03614230	3.70040265		72.00000000	0.47694444	4.30973787	1.560128
73	0.41931650	9.01523110	3.78023515		73.00000000	0.47041096	4.24086351	1.581508
74	0.42947370	9.03458020	3.88011459		74.00000000	0.46405405	4.19253357	1.602989
75	0.43929750	9.02041340	3.96264506		75.00000000	0.45786667	4.13014662	1.624355
76	0.44946811	9.01979920	4.05411210		76.00000000	0.45184211	4.07552506	1.645707
77	0.45957324	9.02010630	4.14539948		77.00000000	0.44597403	4.02273312	1.667085
78	0.46942902	9.02380080	4.23603397		78.00000000	0.44025641	3.97278615	1.688563
79	0.47959664	8.98740670	4.31033006		79.00000000	0.43468354	3.90667780	1.709952
80	0.48938546	9.01696680	4.41277245		80.00000000	0.42925000	3.87053300	1.731304
81	0.49953374	8.98094460	4.48628484		81.00000000	0.42395062	3.80747701	1.752677
82	0.50935084	8.96186160	4.56473173		82.00000000	0.41878049	3.75305277	1.774153
83	0.51951396	8.94285010	4.64593547		83.00000000	0.41373494	3.69996955	1.795530
84	0.52928269	8.90668110	4.71415213		84.00000000	0.40880952	3.64113606	1.816880
85	0.53941458	8.85203460	4.77491653		85.00000000	0.40400000	3.57622198	1.838265
86	0.54956138	8.76639750	4.81767351		86.00000000	0.39930233	3.50044291	1.859744
87	0.55938745	8.66864300	4.84913010		87.00000000	0.39471264	3.42162300	1.881127
88	0.56953424	8.52594280	4.85581635		88.00000000	0.39022727	3.32705541	1.902466
89	0.57933640	8.30877110	4.81357354		89.00000000	0.38584270	3.20587865	1.923845
90	0.58943558	8.05320170	4.74684361		90.00000000	0.38155556	3.07274385	1.945324
91	0.59924150	7.64604850	4.58182957		91.00000000	0.37736264	2.88533303	1.966698
92	0.60935110	7.16919850	4.36855899		92.00000000	0.37326087	2.67598127	1.988169
93	0.61916745	6.51097350	4.03138286		93.00000000	0.36924731	2.40415946	2.009564
94	0.62929487	5.67051270	3.56842455		94.00000000	0.36531915	2.07154687	2.031058
95	0.63938063	4.59267470	2.93646724		95.00000000	0.36147368	1.66013104	2.052435
96	0.64916277	3.29636670	2.13987854		96.00000000	0.35770833	1.17913784	2.073876
97	0.65933186	1.66368160	1.09691828		97.00000000	0.35402062	0.58897759	2.095236
98	0.66901052	-0.22108732	-0.14790974		98.00000000	0.35040816	-0.07747080	2.116712
99	0.67912608	-2.52453520	-1.71447769		99.00000000	0.34686869	-0.87568221	2.138099
100	0.68887395	-5.12460990	-3.53021026		100.00000000	0.34340000	-1.75979104	2.159483
101	0.69908321	-8.22808460	-5.75211579		101.00000000	0.34000000	-2.79754876	2.180971
18:51 02/04/2018
Test Lot:	JK-PERC
Recipe:	Recipe_YJX-LID
Cell Name:	1-20-4h
Test Order:	4
Test Condition:	Light
1	-0.29987109	9.03351020	-2.70888855		1.00000000	34.34000000	310.21074027	0.000000
2	-0.29005167	9.02822490	-2.61865171		2.00000000	17.17000000	155.01462153	0.061790
3	-0.27992111	9.03348160	-2.52866220		3.00000000	11.44666667	103.40325271	0.083208
4	-0.27011511	9.03551580	-2.44062934		4.00000000	8.58500000	77.56990314	0.104709
5	-0.25991386	9.03054620	-2.34716412		5.00000000	6.86800000	62.02179130	0.126076
6	-0.24976024	9.03467460	-2.25650250		6.00000000	5.72333333	51.70845429	0.147427
7	-0.23992445	9.03459170	-2.16761944		7.00000000	4.90571429	44.32112557	0.168801
8	-0.22979316	9.03535940	-2.07626379		8.00000000	4.29250000	38.78428022	0.190321
9	-0.21994695	9.04698280	-1.98985627		9.00000000	3.81555556	34.51926548	0.211704
10	-0.20982312	9.03336620	-1.89540908		10.00000000	3.43400000	31.02057953	0.233049
11	-0.19997615	9.03602980	-1.80699045		11.00000000	3.12181818	28.20884212	0.254434
12	-0.18984115	9.02940940	-1.71415346		12.00000000	2.86166667	25.83915990	0.275913
13	-0.18005969	9.02686980	-1.62537538		13.00000000	2.64153846	23.84482376	0.297290
14	-0.16991352	9.03839780	-1.53574599		14.00000000	2.45285714	22.16989860	0.318660
15	-0.16008145	9.02947810	-1.44545195		15.00000000	2.28933333	20.67148520	0.340040
16	-0.14995685	9.03119660	-1.35428979		16.00000000	2.14625000	19.38320570	0.361518
17	-0.13979134	9.03977490	-1.26368225		17.00000000	2.02000000	18.26034530	0.382901
18	-0.12997416	9.03098680	-1.17379492		18.00000000	1.90777778	17.22911593	0.404245
19	-0.11983468	9.04106140	-1.08343270		19.00000000	1.80736842	16.34052887	0.425613
20	-0.11001749	9.03445150	-0.99394768		20.00000000	1.71700000	15.51215323	0.447099
21	-0.09983858	9.03483490	-0.90202506		21.00000000	1.63523810	14.77410621	0.468472
22	-0.09003702	9.02478310	-0.81256456		22.00000000	1.56090909	14.08686598	0.489838
23	-0.07992212	9.05344770	-0.72357071		23.00000000	1.49304348	13.51719104	0.511214
24	-0.07010641	9.04000190	-0.63376207		24.00000000	1.43083333	12.93473605	0.532678
25	-0.05993941	9.03036880	-0.54127495		25.00000000	1.37360000	12.40411458	0.554072
26	-0.04978654	9.01753040	-0.44895166		26.00000000	1.32076923	11.91007669	0.575431
27	-0.03998424	9.03744510	-0.36135535		27.00000000	1.27185185	11.49429129	0.596798
28	-0.02982244	9.03115370	-0.26933105		28.00000000	1.22642857	11.07606493	0.618268
29	-0.02000227	9.03918270	-0.18080421		29.00000000	1.18413793	10.70363910	0.639640
30	-0.00985239	9.03341290	-0.08900068		30.00000000	1.14466667	10.34024663	0.661017
31	-0.00063063	9.03831770	-0.00569983		31.00000000	1.10774194	10.01212354	0.682496
32	0.00951979	9.04288390	0.08608639		32.00000000	1.07312500	9.70414479	0.703974
33	0.01934936	9.03163050	0.17475624		33.00000000	1.04060606	9.39836944	0.725351
34	0.02950193	9.04461480	0.26683361		34.00000000	1.01000000	9.13506095	0.746738
35	0.03930619	9.02537250	0.35475301		35.00000000	0.98114286	8.85517976	0.768213
36	0.04946472	9.03503700	0.44691556		36.00000000	0.95388889	8.61842141	0.789598
37	0.05927419	9.04031750	0.53585745		37.00000000	0.92810811	8.39039197	0.810944
38	0.06943644	9.03051090	0.62704651		38.00000000	0.90368421	8.16073011	0.832317
39	0.07958008	9.05022910	0.72021798		39.00000000	0.88051282	7.96884275	0.853809
40	0.08941858	9.02500720	0.80700328		40.00000000	0.85850000	7.74796868	0.875180
41	0.09955031	9.04447270	0.90038003		41.00000000	0.83756098	7.57529738	0.896526
42	0.10936424	9.02941800	0.98749544		42.00000000	0.81761905	7.38262415	0.917896
43	0.11953096	9.03209300	1.07961475		43.00000000	0.79860465	7.21307148	0.939374
44	0.12934788	9.02618500	1.16751789		44.00000000	0.78045455	7.04452711	0.960749
45	0.13951533	9.04337500	1.26168945		45.00000000	0.76311111	6.90109994	0.982111
46	0.14932480	9.02731700	1.34800231		46.00000000	0.74652174	6.73908839	1.003477
47	0.15947662	9.03151890	1.44031611		47.00000000	0.73063830	6.59877360	1.024952
48	0.16963367	9.03443810	1.53254489		48.00000000	0.71541667	6.46338759	1.046337
49	0.17945059	9.03565980	1.62145448		49.00000000	0.70081633	6.33233791	1.067692
50	0.18959348	9.04052450	1.71402450		50.00000000	0.68680000	6.20903223	1.089073
51	0.19935234	9.03376670	1.80090253		51.00000000	0.67333333	6.08273624	1.110548
52	0.20954956	9.03174780	1.89259878		52.00000000	0.66038462	5.96442730	1.131922
53	0.21933299	9.03871820	1.98248909		53.00000000	0.64792453	5.85640723	1.153270
54	0.22949599	9.02806760	2.07190531		54.00000000	0.63592593	5.74118225	1.174642
55	0.23930545	9.03296570	2.16163792		55.00000000	0.62436364	5.63985531	1.196128
56	0.24943197	9.02721020	2.25167482		56.00000000	0.61321429	5.53561425	1.217512
57	0.25957486	9.03416440	2.34504196		57.00000000	0.60245614	5.44268782	1.238874
58	0.26941264	9.03251360	2.43347333		58.00000000	0.59206897	5.34787098	1.260224
59	0.27955702	9.03326610	2.52531295		59.00000000	0.58203390	5.25766708	1.281705
60	0.28938136	9.02261260	2.61097590		60.00000000	0.57233333	5.16394194	1.303067
61	0.29953170	9.02563100	2.70346260		61.00000000	0.56295082	5.08098637	1.324446
62	0.30933151	9.02904220	2.79296726		62.00000000	0.55387097	5.00092434	1.345801
63	0.31950566	9.03414440	2.88646027		63.00000000	0.54507937	4.92432569	1.367275
64	0.32929802	9.02571770	2.97215097		64.00000000	0.53656250	4.84286165	1.388654
65	0.33945280	9.02691270	3.06421079		65.00000000	0.52830769	4.76898742	1.410043
66	0.34928238	9.03803060	3.15682484		66.00000000	0.52030303	4.70251471	1.431533
67	0.35941857	9.02539060	3.24389298		67.00000000	0.51253731	4.62584945	1.452926
68	0.36955479	9.03817940	3.34010249		68.00000000	0.50500000	4.56428060	1.474271
69	0.37941933	9.02545260	3.42443118		69.00000000	0.49768116	4.49179771	1.495640
70	0.38954809	9.03746700	3.52052801		70.00000000	0.49057143	4.43352310	1.517130
71	0.39936203	9.02204510	3.60306225		71.00000000	0.48366197	4.36362012	1.538496
72	0.40955627	9.04242520	3.70338194		72.00000000	0.47694444	4.31273446	1.559855
73	0.41936797	9.02499200	3.78479257		73.00000000	0.47041096	4.24545514	1.581246
74	0.42951161	9.01327320	3.87130548		74.00000000	0.46405405	4.18264597	1.602715
75	0.43933448	9.03727820	3.97038792		75.00000000	0.45786667	4.13786845	1.624080
76	0.44949153	9.01263240	4.05110193		76.00000000	0.45184211	4.07228680	1.645428
77	0.45962101	9.02901550	4.14992522		77.00000000	0.44597403	4.02670639	1.666795
78	0.46947888	9.00477030	4.22754948		78.00000000	0.44025641	3.96440785	1.688323
79	0.47961432	9.01530740	4.32387053		79.00000000	0.43468354	3.91880577	1.709706
80	0.48942751	8.99094390	4.40041529		80.00000000	0.42925000	3.85936267	1.731047
81	0.49956372	8.99384780	4.49300006		81.00000000	0.42395062	3.81294733	1.752422
82	0.50938362	8.97232060	4.57035315		82.00000000	0.41878049	3.75743280	1.773896
83	0.51953244	8.94302850	4.64619342		83.00000000	0.41373494	3.70004336	1.795271
84	0.52932256	8.90186410	4.71195749		84.00000000	0.40880952	3.63916682	1.816645
85	0.53944987	8.85290620	4.77569910		85.00000000	0.40400000	3.57657410	1.838014
86	0.54960167	8.77465820	4.82256680		86.00000000	0.39930233	3.50374143	1.859484
87	0.55941188	8.67775630	4.85443997		87.00000000	0.39471264	3.42522013	1.880921
88	0.56953841	8.51749610	4.85104119		88.00000000	0.39022727	3.32375927	1.902278
89	0.57936573	8.33092310	4.82665134		89.00000000	0.38584270	3.21442583	1.923639
90	0.58945727	8.05354500	4.74722065		90.00000000	0.38155556	3.07287484	1.945119
91	0.59926897	7.67899990	4.60178636		91.00000000	0.37736264	2.89776765	1.966488
92	0.60935086	7.18042040	4.37539535		92.00000000	0.37326087	2.68016996	1.987978
93	0.61915958	6.53070070	4.04354590		93.00000000	0.36924731	2.41144368	2.009362
94	0.62929356	5.69324830	3.58272449		94.00000000	0.36531915	2.07985262	2.030850
95	0.63941038	4.60733650	2.94597878		95.00000000	0.36147368	1.66543090	2.052244
96	0.64918858	3.31687330	2.15327627		96.00000000	0.35770833	1.18647322	2.073628
97	0.65934116	1.66583550	1.09835391		97.00000000	0.35402062	0.58974011	2.095110
98	0.66905242	-0.24216594	-0.16202171		98.00000000	0.35040816	-0.08485692	2.116504
99	0.67913723	-2.56360550	-1.74103994		99.00000000	0.34686869	-0.88923447	2.137859
100	0.68887305	-5.20173260	-3.58333340		100.00000000	0.34340000	-1.78627497	2.159230
101	0.69913054	-8.38852500	-5.86467401		101.00000000	0.34000000	-2.85209850	2.180719
