# Supplementary material for: Study on the Electrical Injection Regeneration of Industrialized B-Doped Czochralski Silicon PERC Solar Cells
Source: Hindawi journal article supplement (doi:10.1155/2019/5357370), 2019-06-20
Supplement: f1 [file 5357370.f1.zip › section3.2/IVRawData_1-20-5h.csv]

19:54 02/04/2018
Test Lot:	JK-PERC
Recipe:	Recipe_YJX-LID
Cell Name:	1-20-5h
Test Order:	2
Test Condition:	Light
1	-0.29981536	9.04330920	-2.71132300		1.00000000	34.34000000	310.54723793	0.000000
2	-0.28999066	9.04565910	-2.62315665		2.00000000	17.17000000	155.31396675	0.061729
3	-0.27986971	9.05056670	-2.53297948		3.00000000	11.44666667	103.59882016	0.083217
4	-0.27003384	9.02558420	-2.43721316		4.00000000	8.58500000	77.48464036	0.104657
5	-0.25987941	9.04773520	-2.35132009		5.00000000	6.86800000	62.13984535	0.126008
6	-0.24968182	9.02719970	-2.25392765		6.00000000	5.72333333	51.66567295	0.147377
7	-0.23988837	9.04284670	-2.16927376		7.00000000	4.90571429	44.36162224	0.168838
8	-0.22973765	9.03224660	-2.07504711		8.00000000	4.29250000	38.77091853	0.190289
9	-0.21990997	9.05082040	-1.99036564		9.00000000	3.81555556	34.53390806	0.211709
10	-0.20976298	9.02804090	-1.89374876		10.00000000	3.43400000	31.00229245	0.233103
11	-0.19992934	9.05015950	-1.80939242		11.00000000	3.12181818	28.25295248	0.254456
12	-0.18978161	9.03957080	-1.71554430		12.00000000	2.86166667	25.86823844	0.275953
13	-0.18003207	9.04486470	-1.62836571		13.00000000	2.64153846	23.89235798	0.297350
14	-0.16985755	9.03512380	-1.53468399		14.00000000	2.45285714	22.16186795	0.318712
15	-0.16003506	9.04064270	-1.44681980		15.00000000	2.28933333	20.69704469	0.340070
16	-0.14992008	9.04074950	-1.35538989		16.00000000	2.14625000	19.40370861	0.361562
17	-0.13974704	9.03930760	-1.26321648		17.00000000	2.02000000	18.25940135	0.382939
18	-0.12989554	9.04575540	-1.17500328		18.00000000	1.90777778	17.25729114	0.404324
19	-0.11979246	9.03111360	-1.08185931		19.00000000	1.80736842	16.32254953	0.425682
20	-0.10999306	9.04259300	-0.99462247		20.00000000	1.71700000	15.52613218	0.447156
21	-0.09982746	9.04183580	-0.90262351		21.00000000	1.63523810	14.78555435	0.468544
22	-0.08999531	9.03492360	-0.81310075		22.00000000	1.56090909	14.10269438	0.489921
23	-0.07989223	9.04257970	-0.72243188		23.00000000	1.49304348	13.50096465	0.511396
24	-0.07005040	9.04461100	-0.63357865		24.00000000	1.43083333	12.94133091	0.532784
25	-0.05987588	9.03177930	-0.54078572		25.00000000	1.37360000	12.40605205	0.554141
26	-0.04973559	9.04559040	-0.44988775		26.00000000	1.32076923	11.94713747	0.575518
27	-0.03990493	9.02686980	-0.36021657		27.00000000	1.27185185	11.48084107	0.596997
28	-0.02974752	9.04123120	-0.26895417		28.00000000	1.22642857	11.08842426	0.618365
29	-0.01995853	9.03187940	-0.18026306		29.00000000	1.18413793	10.69499099	0.639706
30	-0.00978996	9.03788190	-0.08848050		30.00000000	1.14466667	10.34536215	0.661083
31	-0.00063735	9.03876300	-0.00576086		31.00000000	1.10774194	10.01261682	0.682670
32	0.00952134	9.02525040	0.08593247		32.00000000	1.07312500	9.68522184	0.704057
33	0.01931674	9.04134850	0.17464940		33.00000000	1.04060606	9.40848205	0.725404
34	0.02949768	9.04352090	0.26676286		34.00000000	1.01000000	9.13395611	0.746806
35	0.03931987	9.03957750	0.35543504		35.00000000	0.98114286	8.86911690	0.768281
36	0.04947625	9.03485010	0.44701051		36.00000000	0.95388889	8.61824312	0.789653
37	0.05928133	9.04765510	0.53635700		37.00000000	0.92810811	8.39720206	0.810997
38	0.06943324	9.03509040	0.62733555		38.00000000	0.90368421	8.16486854	0.832371
39	0.07958589	9.04256340	0.71966043		39.00000000	0.88051282	7.96209300	0.853852
40	0.08939692	9.04103280	0.80824052		40.00000000	0.85850000	7.76172666	0.875218
41	0.09954586	9.04580880	0.90047281		41.00000000	0.83756098	7.57641644	0.896581
42	0.10935987	9.02981470	0.98749936		42.00000000	0.81761905	7.38294850	0.917959
43	0.11951029	9.04522320	1.08099725		43.00000000	0.79860465	7.22355732	0.939431
44	0.12934588	9.04024220	1.16931808		44.00000000	0.78045455	7.05549812	0.960827
45	0.13948067	9.03739170	1.26054145		45.00000000	0.76311111	6.89653402	0.982195
46	0.14928873	9.03892990	1.34941037		46.00000000	0.74652174	6.74775767	1.003558
47	0.15945254	9.03850940	1.44121328		47.00000000	0.73063830	6.60388112	1.025038
48	0.16961339	9.03927040	1.53318130		48.00000000	0.71541667	6.46684470	1.046422
49	0.17940059	9.04217620	1.62217175		49.00000000	0.70081633	6.33690471	1.067812
50	0.18959865	9.04433920	1.71479450		50.00000000	0.68680000	6.21165216	1.089169
51	0.19936429	9.03891850	1.80203757		51.00000000	0.67333333	6.08620512	1.110650
52	0.20947079	9.03899000	1.89340438		52.00000000	0.66038462	5.96920993	1.132034
53	0.21931532	9.03535750	1.98159232		53.00000000	0.64792453	5.85422975	1.153411
54	0.22947690	9.03620150	2.07359951		54.00000000	0.63592593	5.74635481	1.174903
55	0.23929165	9.03071120	2.16097378		55.00000000	0.62436364	5.63844768	1.196284
56	0.24939519	9.03018380	2.25208440		56.00000000	0.61321429	5.53743771	1.217650
57	0.25957686	9.02949430	2.34384778		57.00000000	0.60245614	5.43987429	1.239025
58	0.26938790	9.03464600	2.43382431		58.00000000	0.59206897	5.34913351	1.260513
59	0.27954799	9.04888150	2.52959664		59.00000000	0.58203390	5.26675577	1.281894
60	0.28938583	9.04191400	2.61660179		60.00000000	0.57233333	5.17498878	1.303266
61	0.29950052	9.03650860	2.70643902		61.00000000	0.56295082	5.08710992	1.324648
62	0.30933166	9.04395480	2.79758155		62.00000000	0.55387097	5.00918400	1.346128
63	0.31945899	9.03817560	2.88732645		63.00000000	0.54507937	4.92652302	1.367514
64	0.32930946	9.03944400	2.97677442		64.00000000	0.53656250	4.85022667	1.388859
65	0.33944872	9.03701400	3.06760283		65.00000000	0.52830769	4.77432401	1.410225
66	0.34923297	9.03681560	3.15595395		66.00000000	0.52030303	4.70188254	1.431706
67	0.35938042	9.04334740	3.25000199		67.00000000	0.51253731	4.63505298	1.453076
68	0.36959931	9.03927420	3.34090951		68.00000000	0.50500000	4.56483347	1.474424
69	0.37940440	9.03087330	3.42635307		69.00000000	0.49768116	4.49449549	1.495805
70	0.38954812	9.03905390	3.52114645		70.00000000	0.49057143	4.43430158	1.517280
71	0.39940232	9.03228660	3.60751622		71.00000000	0.48366197	4.36857355	1.538664
72	0.40954232	9.02316670	3.69536862		72.00000000	0.47694444	4.30354923	1.560026
73	0.41936228	9.03435900	3.78866939		73.00000000	0.47041096	4.24986148	1.581405
74	0.42950004	9.02475640	3.87613323		74.00000000	0.46405405	4.18797479	1.602884
75	0.43932149	9.01812650	3.96185677		75.00000000	0.45786667	4.12909952	1.624251
76	0.44946820	9.02582170	4.05681983		76.00000000	0.45184211	4.07824628	1.645643
77	0.45962381	9.01840500	4.14507367		77.00000000	0.44597403	4.02197439	1.667009
78	0.46947283	9.01850220	4.23394175		78.00000000	0.44025641	3.97045340	1.688484
79	0.47960240	9.00791650	4.32021837		79.00000000	0.43468354	3.91559307	1.709869
80	0.48944321	8.99825380	4.40413422		80.00000000	0.42925000	3.86250044	1.731258
81	0.49956235	8.98462770	4.48838173		81.00000000	0.42395062	3.80903846	1.752619
82	0.50936222	8.97271730	4.57036320		82.00000000	0.41878049	3.75759893	1.774091
83	0.51952159	8.93263720	4.64069788		83.00000000	0.41373494	3.69574411	1.795483
84	0.52931476	8.91514110	4.71891577		84.00000000	0.40880952	3.64459459	1.816867
85	0.53941232	8.85007290	4.77383836		85.00000000	0.40400000	3.57542945	1.838342
86	0.54958135	8.77318290	4.82157770		86.00000000	0.39930233	3.50315233	1.859733
87	0.55939460	8.67598150	4.85329720		87.00000000	0.39471264	3.42451959	1.881078
88	0.56951678	8.51335530	4.84849870		88.00000000	0.39022727	3.32214342	1.902457
89	0.57931888	8.31967640	4.81974561		89.00000000	0.38584270	3.21008638	1.923941
90	0.58947450	8.01834680	4.72661097		90.00000000	0.38155556	3.05944477	1.945307
91	0.59927958	7.66163020	4.59145853		91.00000000	0.37736264	2.89121298	1.966668
92	0.60936749	7.14570330	4.35435928		92.00000000	0.37326087	2.66721143	1.988134
93	0.61915988	6.48784400	4.01701271		93.00000000	0.36924731	2.39561896	2.009646
94	0.62929171	5.63675550	3.54716351		94.00000000	0.36531915	2.05921472	2.031031
95	0.63941312	4.55576660	2.91301694		95.00000000	0.36147368	1.64678974	2.052392
96	0.64916462	3.24409630	2.10595254		96.00000000	0.35770833	1.16044028	2.073766
97	0.65928596	1.59526840	1.05173806		97.00000000	0.35402062	0.56475791	2.095255
98	0.66899729	-0.32145041	-0.21504945		98.00000000	0.35040816	-0.11263885	2.116630
99	0.67908967	-2.65448090	-1.80263056		99.00000000	0.34686869	-0.92075630	2.137969
100	0.68882108	-5.31082820	-3.65821042		100.00000000	0.34340000	-1.82373840	2.159384
101	0.69912481	-8.51891610	-5.95578560		101.00000000	0.34000000	-2.89643147	2.180864
19:54 02/04/2018
Test Lot:	JK-PERC
Recipe:	Recipe_YJX-LID
Cell Name:	1-20-5h
Test Order:	3
Test Condition:	Light
1	-0.29983214	9.04162790	-2.71097064		1.00000000	34.34000000	310.48950209	0.000000
2	-0.28998882	9.04372020	-2.62257775		2.00000000	17.17000000	155.28067583	0.061820
3	-0.27987158	9.04293440	-2.53086034		3.00000000	11.44666667	103.51145577	0.083246
4	-0.27004239	9.05062290	-2.44405184		4.00000000	8.58500000	77.69959760	0.104632
5	-0.25985670	9.04321290	-2.34993946		5.00000000	6.86800000	62.10878620	0.126115
6	-0.24970150	9.02961060	-2.25470731		6.00000000	5.72333333	51.67947133	0.147550
7	-0.23988125	9.03222850	-2.16666226		7.00000000	4.90571429	44.30953238	0.168945
8	-0.22972755	9.03706650	-2.07606315		8.00000000	4.29250000	38.79160795	0.190437
9	-0.21989091	9.04476360	-1.98886130		9.00000000	3.81555556	34.51079800	0.211821
10	-0.20975210	9.05321120	-1.89893006		10.00000000	3.43400000	31.08872726	0.233172
11	-0.19990802	9.03808310	-1.80678530		11.00000000	3.12181818	28.21525215	0.254542
12	-0.18977368	9.02982710	-1.71362352		12.00000000	2.86166667	25.84035522	0.276060
13	-0.17998171	9.03355220	-1.62587417		13.00000000	2.64153846	23.86247558	0.297440
14	-0.16985330	9.05236530	-1.53757412		14.00000000	2.45285714	22.20415889	0.318774
15	-0.16006207	9.04572770	-1.44787790		15.00000000	2.28933333	20.70868595	0.340162
16	-0.14987116	9.02635770	-1.35279070		16.00000000	2.14625000	19.37282021	0.361640
17	-0.13971597	9.04381370	-1.26356520		17.00000000	2.02000000	18.26850367	0.383026
18	-0.12994112	9.04077630	-1.17476860		18.00000000	1.90777778	17.24779212	0.404370
19	-0.11977402	9.02932830	-1.08147895		19.00000000	1.80736842	16.31932283	0.425744
20	-0.10996865	9.04417800	-0.99457605		20.00000000	1.71700000	15.52885363	0.447219
21	-0.09980378	9.02332880	-0.90056235		21.00000000	1.63523810	14.75529100	0.468590
22	-0.08996268	9.05350300	-0.81447743		22.00000000	1.56090909	14.13169514	0.489934
23	-0.07984397	9.02378080	-0.72049447		23.00000000	1.49304348	13.47289707	0.511311
24	-0.07000138	9.03989220	-0.63280492		24.00000000	1.43083333	12.93457909	0.532789
25	-0.05984693	9.03998370	-0.54101531		25.00000000	1.37360000	12.41732161	0.554167
26	-0.04971705	9.04614350	-0.44974757		26.00000000	1.32076923	11.94786799	0.575523
27	-0.03993252	9.03096870	-0.36062933		27.00000000	1.27185185	11.48605427	0.596901
28	-0.02977212	9.03433510	-0.26897132		28.00000000	1.22642857	11.07996669	0.618376
29	-0.01993102	9.03478050	-0.18007243		29.00000000	1.18413793	10.69842629	0.639768
30	-0.00981826	9.04043100	-0.08876129		30.00000000	1.14466667	10.34828002	0.661128
31	-0.00060833	9.03468510	-0.00549604		31.00000000	1.10774194	10.00809956	0.682612
32	0.00952730	9.04086690	0.08613508		32.00000000	1.07312500	9.70198029	0.704101
33	0.01936142	9.02921960	0.17481852		33.00000000	1.04060606	9.39586064	0.725469
34	0.02948357	9.04187770	0.26658687		34.00000000	1.01000000	9.13229648	0.746863
35	0.03931174	9.03566840	0.35520782		35.00000000	0.98114286	8.86528151	0.768222
36	0.04942719	9.03356080	0.44650352		36.00000000	0.95388889	8.61701327	0.789699
37	0.05928736	9.03925800	0.53591373		37.00000000	0.92810811	8.38940864	0.811082
38	0.06941100	9.03007600	0.62678662		38.00000000	0.90368421	8.16033710	0.832462
39	0.07958451	9.03012280	0.71865789		39.00000000	0.88051282	7.95113890	0.853938
40	0.08938811	9.03225900	0.80737656		40.00000000	0.85850000	7.75419435	0.875339
41	0.09955715	9.04022880	0.90001945		41.00000000	0.83756098	7.57174285	0.896695
42	0.10939126	9.04244040	0.98916395		42.00000000	0.81761905	7.39327151	0.918067
43	0.11951565	9.03606890	1.07995165		43.00000000	0.79860465	7.21624665	0.939542
44	0.12935573	9.02886100	1.16793491		44.00000000	0.78045455	7.04661561	0.960907
45	0.13951658	9.04059120	1.26131237		45.00000000	0.76311111	6.89897560	0.982252
46	0.14933507	9.03817840	1.34971700		46.00000000	0.74652174	6.74719666	1.003635
47	0.15945126	9.02938840	1.43974736		47.00000000	0.73063830	6.59721697	1.025110
48	0.16961212	9.05236340	1.53539055		48.00000000	0.71541667	6.47621165	1.046501
49	0.17943805	9.02937980	1.62021430		49.00000000	0.70081633	6.32793678	1.067846
50	0.18960859	9.04520700	1.71504895		50.00000000	0.68680000	6.21224817	1.089223
51	0.19938837	9.01571750	1.79762922		51.00000000	0.67333333	6.07058312	1.110694
52	0.20951425	9.04193970	1.89441521		52.00000000	0.66038462	5.97115787	1.132077
53	0.21931858	9.02858920	1.98013736		53.00000000	0.64792453	5.84984440	1.153411
54	0.22947051	9.03795150	2.07394334		54.00000000	0.63592593	5.74746768	1.174785
55	0.23930314	9.03693680	2.16256735		55.00000000	0.62436364	5.64233472	1.196266
56	0.24946102	9.03332330	2.25346204		56.00000000	0.61321429	5.53936290	1.217632
57	0.25958765	9.03246400	2.34471610		57.00000000	0.60245614	5.44166340	1.238986
58	0.26940465	9.02876280	2.43239068		58.00000000	0.59206897	5.34565025	1.260360
59	0.27957070	9.03636550	2.52630303		59.00000000	0.58203390	5.25947104	1.281839
60	0.28935122	9.03636930	2.61468448		60.00000000	0.57233333	5.17181536	1.303238
61	0.29952994	9.02487280	2.70321961		61.00000000	0.56295082	5.08055954	1.324592
62	0.30934694	9.04202180	2.79712178		62.00000000	0.55387097	5.00811336	1.345959
63	0.31949067	9.04434780	2.88958474		63.00000000	0.54507937	4.92988736	1.367434
64	0.32930619	9.03419490	2.97501630		64.00000000	0.53656250	4.84741020	1.388814
65	0.33945069	9.02406790	3.06322608		65.00000000	0.52830769	4.76748449	1.410208
66	0.34927660	9.04357530	3.15870923		66.00000000	0.52030303	4.70539963	1.431553
67	0.35943896	9.03729530	3.24835602		67.00000000	0.51253731	4.63195105	1.453027
68	0.36958343	9.04426960	3.34261218		68.00000000	0.50500000	4.56735615	1.474422
69	0.37940192	9.02635960	3.42461816		69.00000000	0.49768116	4.49224911	1.495813
70	0.38952035	9.03384400	3.51886608		70.00000000	0.49057143	4.43174576	1.517296
71	0.39938125	9.03875920	3.60991095		71.00000000	0.48366197	4.37170410	1.538692
72	0.40952128	9.03858850	3.70149433		72.00000000	0.47694444	4.31090457	1.560049
73	0.41933829	9.02920820	3.78629273		73.00000000	0.47041096	4.24743849	1.581423
74	0.42949095	9.02786450	3.87738610		74.00000000	0.46405405	4.18941712	1.602904
75	0.43932730	9.02552700	3.96516041		75.00000000	0.45786667	4.13248796	1.624285
76	0.44946134	9.03225040	4.05964737		76.00000000	0.45184211	4.08115104	1.645638
77	0.45963264	9.02239800	4.14698861		77.00000000	0.44597403	4.02375516	1.667011
78	0.46945557	9.01762010	4.23337198		78.00000000	0.44025641	3.97006505	1.688492
79	0.47960380	9.01856140	4.32533632		79.00000000	0.43468354	3.92022023	1.709877
80	0.48941559	9.00378700	4.40659373		80.00000000	0.42925000	3.86487557	1.731221
81	0.49956971	8.98635770	4.48931211		81.00000000	0.42395062	3.80977189	1.752586
82	0.50938672	8.96438410	4.56633821		82.00000000	0.41878049	3.75410915	1.774068
83	0.51951039	8.94555280	4.64730762		83.00000000	0.41373494	3.70108775	1.795444
84	0.52931917	8.89722540	4.70947196		84.00000000	0.40880952	3.63727048	1.816782
85	0.53945178	8.86413570	4.78177378		85.00000000	0.40400000	3.58111082	1.838159
86	0.54956943	8.76661870	4.81786564		86.00000000	0.39930233	3.50053123	1.859634
87	0.55942291	8.67689230	4.85405234		87.00000000	0.39471264	3.42487910	1.881013
88	0.56954134	8.51180080	4.84782243		88.00000000	0.39022727	3.32153681	1.902363
89	0.57932484	8.32752800	4.82434383		89.00000000	0.38584270	3.21311586	1.923736
90	0.58946860	8.03259180	4.73496064		90.00000000	0.38155556	3.06488003	1.945208
91	0.59926105	7.66277360	4.59200175		91.00000000	0.37736264	2.89164446	1.966571
92	0.60937798	7.14403300	4.35341640		92.00000000	0.37326087	2.66658797	1.988035
93	0.61915404	6.50868510	4.02987867		93.00000000	0.36924731	2.40331448	2.009433
94	0.62929034	5.64262250	3.55084783		94.00000000	0.36531915	2.06135805	2.030915
95	0.63941473	4.57233190	2.92361637		95.00000000	0.36147368	1.65277766	2.052348
96	0.64916694	3.25027180	2.10996900		96.00000000	0.35770833	1.16264931	2.073753
97	0.65928984	1.59959670	1.05459785		97.00000000	0.35402062	0.56629021	2.095118
98	0.66901606	-0.32970908	-0.22058067		98.00000000	0.35040816	-0.11553275	2.116598
99	0.67912483	-2.66932990	-1.81280821		99.00000000	0.34686869	-0.92590696	2.137984
100	0.68883610	-5.34251070	-3.68011423		100.00000000	0.34340000	-1.83461817	2.159370
101	0.69913763	-8.55983830	-5.98450506		101.00000000	0.34000000	-2.91034502	2.180847
19:54 02/04/2018
Test Lot:	JK-PERC
Recipe:	Recipe_YJX-LID
Cell Name:	1-20-5h
Test Order:	4
Test Condition:	Light
1	-0.29979908	9.04112240	-2.71052018		1.00000000	34.34000000	310.47214322	0.000000
2	-0.28997791	9.03420350	-2.61971945		2.00000000	17.17000000	155.11727410	0.061809
3	-0.27984411	9.04585650	-2.53142966		3.00000000	11.44666667	103.54490407	0.083210
4	-0.27003857	9.03150840	-2.43885561		4.00000000	8.58500000	77.53549961	0.104704
5	-0.25989881	9.04647450	-2.35116796		5.00000000	6.86800000	62.13118687	0.126077
6	-0.24972259	9.03640650	-2.25659484		6.00000000	5.72333333	51.71836654	0.147456
7	-0.23992597	9.04927920	-2.17115709		7.00000000	4.90571429	44.39317825	0.168808
8	-0.22976241	9.03796670	-2.07658501		8.00000000	4.29250000	38.79547206	0.190288
9	-0.21993676	9.04699330	-1.98976639		9.00000000	3.81555556	34.51930555	0.211659
10	-0.20978138	9.03789810	-1.89598274		10.00000000	3.43400000	31.03614208	0.233105
11	-0.19997582	9.04027270	-1.80783595		11.00000000	3.12181818	28.22208768	0.254603
12	-0.18983831	9.03733920	-1.71563320		12.00000000	2.86166667	25.86185234	0.276004
13	-0.18007220	9.02877330	-1.62583107		13.00000000	2.64153846	23.84985193	0.297344
14	-0.16989449	9.04204650	-1.53619388		14.00000000	2.45285714	22.17884834	0.318720
15	-0.16010903	9.04101090	-1.44754749		15.00000000	2.28933333	20.69788762	0.340202
16	-0.14994398	9.03527640	-1.35478530		16.00000000	2.14625000	19.39196197	0.361574
17	-0.13978934	9.03980060	-1.26366776		17.00000000	2.02000000	18.26039721	0.382919
18	-0.12994657	9.03636650	-1.17424483		18.00000000	1.90777778	17.23937920	0.404297
19	-0.11982766	9.03727250	-1.08291522		19.00000000	1.80736842	16.33368093	0.425774
20	-0.11001392	9.02729130	-0.99312770		20.00000000	1.71700000	15.49985916	0.447147
21	-0.09982430	9.04222390	-0.90263369		21.00000000	1.63523810	14.78618899	0.468516
22	-0.09002917	9.03212550	-0.81315472		22.00000000	1.56090909	14.09832680	0.489890
23	-0.07991249	9.04257390	-0.72261461		23.00000000	1.49304348	13.50095599	0.511371
24	-0.07007195	9.04450990	-0.63376645		24.00000000	1.43083333	12.94118625	0.532760
25	-0.05992848	9.02995970	-0.54115177		25.00000000	1.37360000	12.40355264	0.554108
26	-0.04974258	9.04681110	-0.45001175		26.00000000	1.32076923	11.94874974	0.575498
27	-0.03992512	9.03746410	-0.36082185		27.00000000	1.27185185	11.49431545	0.596981
28	-0.02976007	9.04636380	-0.26922038		28.00000000	1.22642857	11.09471903	0.618359
29	-0.01994260	9.02402400	-0.17996252		29.00000000	1.18413793	10.68568911	0.639718
30	-0.00982146	9.04285430	-0.08881405		30.00000000	1.14466667	10.35105389	0.661092
31	-0.00062178	9.02876660	-0.00561387		31.00000000	1.10774194	10.00154339	0.682686
32	0.00952446	9.04599380	0.08615823		32.00000000	1.07312500	9.70748210	0.704078
33	0.01935504	9.03811360	0.17493309		33.00000000	1.04060606	9.40511579	0.725441
34	0.02947143	9.03009800	0.26612991		34.00000000	1.01000000	9.12039898	0.746805
35	0.03929234	9.03827860	0.35513508		35.00000000	0.98114286	8.86784249	0.768283
36	0.04948762	9.03845880	0.44729179		36.00000000	0.95388889	8.62168542	0.789654
37	0.05929810	9.03218080	0.53559118		37.00000000	0.92810811	8.38284023	0.811044
38	0.06940779	9.03514960	0.62710978		38.00000000	0.90368421	8.16492203	0.832393
39	0.07959563	9.03746800	0.71934299		39.00000000	0.88051282	7.95760644	0.853869
40	0.08939793	9.04192540	0.80832941		40.00000000	0.85850000	7.76249296	0.875266
41	0.09951580	9.03395180	0.89902097		41.00000000	0.83756098	7.56648548	0.896652
42	0.10935978	9.03670310	0.98825186		42.00000000	0.81761905	7.38858058	0.918120
43	0.11950371	9.03666310	1.07991477		43.00000000	0.79860465	7.21672118	0.939509
44	0.12932536	9.03399470	1.16832462		44.00000000	0.78045455	7.05062223	0.960860
45	0.13945290	9.04218860	1.26095942		45.00000000	0.76311111	6.90019459	0.982238
46	0.14929613	9.03961850	1.34958006		46.00000000	0.74652174	6.74827172	1.003727
47	0.15941179	9.03915980	1.44094864		47.00000000	0.73063830	6.60435633	1.025103
48	0.16958176	9.02215480	1.52999289		48.00000000	0.71541667	6.45459991	1.046442
49	0.17938554	9.04260730	1.62211299		49.00000000	0.70081633	6.33720683	1.067837
50	0.18954213	9.03622250	1.71274486		50.00000000	0.68680000	6.20607761	1.089312
51	0.19930275	9.03180220	1.80006302		51.00000000	0.67333333	6.08141348	1.110682
52	0.20942955	9.02637200	1.89038903		52.00000000	0.66038462	5.96087720	1.132044
53	0.21925716	9.05383400	1.98511793		53.00000000	0.64792453	5.86620112	1.153416
54	0.22942266	9.03668980	2.07322141		54.00000000	0.63592593	5.74666533	1.174889
55	0.23927706	9.03387170	2.16159826		55.00000000	0.62436364	5.64042099	1.196254
56	0.24942099	9.03182410	2.25272651		56.00000000	0.61321429	5.53844356	1.217605
57	0.25956267	9.04081730	2.34665868		57.00000000	0.60245614	5.44669590	1.238977
58	0.26939327	9.03148170	2.43302039		58.00000000	0.59206897	5.34726003	1.260460
59	0.27954835	9.03425690	2.52551161		59.00000000	0.58203390	5.25824376	1.281838
60	0.28938267	9.03453250	2.61443714		60.00000000	0.57233333	5.17076410	1.303203
61	0.29951021	9.03030680	2.70466909		61.00000000	0.56295082	5.08361861	1.324577
62	0.30933335	9.03388790	2.79448281		62.00000000	0.55387097	5.00360823	1.346054
63	0.31950110	9.02926350	2.88485962		63.00000000	0.54507937	4.92166522	1.367444
64	0.32931009	9.02133850	2.97081779		64.00000000	0.53656250	4.84051194	1.388808
65	0.33945623	9.04022980	3.06876233		65.00000000	0.52830769	4.77602294	1.410168
66	0.34926897	9.04082010	3.15767792		66.00000000	0.52030303	4.70396609	1.431648
67	0.35941288	9.02730270	3.24452886		67.00000000	0.51253731	4.62682947	1.453020
68	0.36958361	9.02722640	3.33631492		68.00000000	0.50500000	4.55874933	1.474465
69	0.37942386	9.02740000	3.42521095		69.00000000	0.49768116	4.49276690	1.495806
70	0.38956034	9.01784900	3.51299632		70.00000000	0.49057143	4.42389907	1.517278
71	0.39936489	9.02723120	3.60515920		71.00000000	0.48366197	4.36612844	1.538679
72	0.40953335	9.01965810	3.69385080		72.00000000	0.47694444	4.30187582	1.560069
73	0.41935277	9.03351590	3.78822992		73.00000000	0.47041096	4.24946488	1.581545
74	0.42950341	9.02796750	3.87754283		74.00000000	0.46405405	4.18946492	1.602928
75	0.43929455	9.02797890	3.96594193		75.00000000	0.45786667	4.13361061	1.624269
76	0.44941986	9.02349660	4.05533858		76.00000000	0.45184211	4.07719570	1.645635
77	0.45958313	9.01904200	4.14499955		77.00000000	0.44597403	4.02225847	1.667120
78	0.46944201	9.02323250	4.23588440		78.00000000	0.44025641	3.97253595	1.688501
79	0.47959560	9.01184650	4.32204193		79.00000000	0.43468354	3.91730138	1.709841
80	0.48943064	8.99745270	4.40362903		80.00000000	0.42925000	3.86215657	1.731226
81	0.49954256	8.97170640	4.48174918		81.00000000	0.42395062	3.80356047	1.752704
82	0.50933224	8.97667120	4.57210805		82.00000000	0.41878049	3.75925474	1.774079
83	0.51951408	8.93840410	4.64362678		83.00000000	0.41373494	3.69813008	1.795422
84	0.52928662	8.89502140	4.70801581		84.00000000	0.40880952	3.63636946	1.816797
85	0.53943503	8.85473160	4.77655241		85.00000000	0.40400000	3.57731157	1.838278
86	0.54952389	8.77200700	4.82042741		86.00000000	0.39930233	3.50268280	1.859671
87	0.55935818	8.67560770	4.85277213		87.00000000	0.39471264	3.42437205	1.881011
88	0.56951922	8.51805400	4.85119547		88.00000000	0.39022727	3.32397698	1.902391
89	0.57932448	8.31690030	4.81818394		89.00000000	0.38584270	3.20901524	1.923856
90	0.58944905	8.03114320	4.73394973		90.00000000	0.38155556	3.06432731	1.945227
91	0.59925210	7.66487120	4.59319016		91.00000000	0.37736264	2.89243601	1.966598
92	0.60936701	7.15011070	4.35704158		92.00000000	0.37326087	2.66885654	1.988077
93	0.61919314	6.50387480	4.02715466		93.00000000	0.36924731	2.40153829	2.009587
94	0.62929165	5.65054460	3.55584053		94.00000000	0.36531915	2.06425214	2.030977
95	0.63939089	4.55366330	2.91157083		95.00000000	0.36147368	1.64602945	2.052346
96	0.64918798	3.25500040	2.11310713		96.00000000	0.35770833	1.16434077	2.073707
97	0.65926421	1.58812260	1.04699239		97.00000000	0.35402062	0.56222815	2.095191
98	0.66900623	-0.32360914	-0.21649653		98.00000000	0.35040816	-0.11339528	2.116561
99	0.67910099	-2.68267010	-1.82180392		99.00000000	0.34686869	-0.93053425	2.137949
100	0.68881249	-5.35759500	-3.69037835		100.00000000	0.34340000	-1.83979812	2.159287
101	0.69909561	-8.58050060	-5.99859030		101.00000000	0.34000000	-2.91737020	2.180760
