# Supplementary material for: Study on the Electrical Injection Regeneration of Industrialized B-Doped Czochralski Silicon PERC Solar Cells
Source: Hindawi journal article supplement (doi:10.1155/2019/5357370), 2019-06-20
Supplement: f1 [file 5357370.f1.zip › section3.2/IVRawData_1-20-6h.csv]

20:58 02/04/2018
Test Lot:	JK-PERC
Recipe:	Recipe_YJX-LID
Cell Name:	1-20-6h
Test Order:	2
Test Condition:	Light
1	-0.29987749	9.01459500	-2.70327412		1.00000000	34.34000000	309.56119230	0.000000
2	-0.29008105	9.01877210	-2.61617488		2.00000000	17.17000000	154.85231696	0.061785
3	-0.27993703	9.02408890	-2.52617665		3.00000000	11.44666667	103.29573761	0.083294
4	-0.27011678	9.02016540	-2.43649803		4.00000000	8.58500000	77.43811996	0.104802
5	-0.25995266	9.03571220	-2.34885742		5.00000000	6.86800000	62.05727139	0.126179
6	-0.24980491	9.01238160	-2.25133717		6.00000000	5.72333333	51.58086402	0.147550
7	-0.23998094	9.02658180	-2.16620759		7.00000000	4.90571429	44.28183129	0.168933
8	-0.22985329	9.01592640	-2.07234035		8.00000000	4.29250000	38.70086407	0.190407
9	-0.22002782	9.01692770	-1.98397494		9.00000000	3.81555556	34.40458858	0.211795
10	-0.20991804	9.01601700	-1.89262462		10.00000000	3.43400000	30.96100238	0.233126
11	-0.20006727	9.01843170	-1.80429301		11.00000000	3.12181818	28.15390405	0.254495
12	-0.18996119	9.01008700	-1.71156685		12.00000000	2.86166667	25.78386563	0.275987
13	-0.18016624	9.02488990	-1.62598048		13.00000000	2.64153846	23.83959378	0.297362
14	-0.16999766	9.01345350	-1.53226600		14.00000000	2.45285714	22.10871380	0.318702
15	-0.16019081	9.02650360	-1.44596292		15.00000000	2.28933333	20.66467557	0.340086
16	-0.15001552	9.02067950	-1.35324193		16.00000000	2.14625000	19.36063338	0.361572
17	-0.13987075	9.01858330	-1.26143601		17.00000000	2.02000000	18.21753827	0.382950
18	-0.13003413	9.01804260	-1.17265332		18.00000000	1.90777778	17.20442127	0.404323
19	-0.11990052	9.01331140	-1.08070072		19.00000000	1.80736842	16.29037439	0.425736
20	-0.11009516	9.02511690	-0.99362169		20.00000000	1.71700000	15.49612572	0.447216
21	-0.09993848	9.01523400	-0.90096880		21.00000000	1.63523810	14.74205407	0.468603
22	-0.09013385	9.01819610	-0.81284476		22.00000000	1.56090909	14.07658428	0.489981
23	-0.07996824	9.02306940	-0.72155902		23.00000000	1.49304348	13.47183492	0.511343
24	-0.07015394	9.02372650	-0.63305000		24.00000000	1.43083333	12.91144867	0.532818
25	-0.05995782	9.01821610	-0.54071259		25.00000000	1.37360000	12.38742163	0.554187
26	-0.04986292	9.02207090	-0.44986681		26.00000000	1.32076923	11.91607364	0.575590
27	-0.03999727	9.01325800	-0.36050567		27.00000000	1.27185185	11.46352888	0.597068
28	-0.02985175	9.02851580	-0.26951702		28.00000000	1.22642857	11.07282973	0.618453
29	-0.02001810	9.02203270	-0.18060398		29.00000000	1.18413793	10.68333114	0.639816
30	-0.00988078	9.00689510	-0.08899513		30.00000000	1.14466667	10.30989259	0.661189
31	-0.00066638	9.01917270	-0.00601020		31.00000000	1.10774194	9.99091582	0.682785
32	0.00948041	9.02466580	0.08555755		32.00000000	1.07312500	9.68459449	0.704167
33	0.01929294	9.01466660	0.17391945		33.00000000	1.04060606	9.38071670	0.725516
34	0.02944338	9.01949980	0.26556454		34.00000000	1.01000000	9.10969480	0.746889
35	0.03923656	9.01692960	0.35379327		35.00000000	0.98114286	8.84689607	0.768367
36	0.04935573	9.01529220	0.44495633		36.00000000	0.95388889	8.59958706	0.789741
37	0.05921143	9.03677650	0.53508045		37.00000000	0.92810811	8.38710554	0.811095
38	0.06935963	9.00609680	0.62465954		38.00000000	0.90368421	8.13866748	0.832475
39	0.07951900	9.03868290	0.71874699		39.00000000	0.88051282	7.95867617	0.853954
40	0.08935385	9.01209640	0.80526553		40.00000000	0.85850000	7.73688476	0.875340
41	0.09945145	9.01225190	0.89628147		41.00000000	0.83756098	7.54831049	0.896699
42	0.10925207	9.02531050	0.98603385		42.00000000	0.81761905	7.37926578	0.918063
43	0.11941440	9.02546020	1.07776991		43.00000000	0.79860465	7.20777449	0.939546
44	0.12926044	9.02495290	1.16656938		44.00000000	0.78045455	7.04356551	0.960918
45	0.13943319	9.01429270	1.25689159		45.00000000	0.76311111	6.87890692	0.982262
46	0.14921074	9.02324580	1.34636518		46.00000000	0.74652174	6.73604915	1.003638
47	0.15937458	9.00753400	1.43557195		47.00000000	0.73063830	6.58124931	1.025114
48	0.16951905	9.02057550	1.52915939		48.00000000	0.71541667	6.45347006	1.046494
49	0.17935391	9.00760750	1.61554962		49.00000000	0.70081633	6.31267840	1.067848
50	0.18950136	9.02073100	1.70944079		50.00000000	0.68680000	6.19543805	1.089216
51	0.19926403	9.01219180	1.79580566		51.00000000	0.67333333	6.06820915	1.110691
52	0.20940925	9.01302430	1.88741066		52.00000000	0.66038462	5.95206259	1.132062
53	0.21920988	9.01134870	1.97537667		53.00000000	0.64792453	5.83867386	1.153448
54	0.22935064	9.01983640	2.06870525		54.00000000	0.63592593	5.73594781	1.174791
55	0.23920113	9.00862690	2.15487373		55.00000000	0.62436364	5.62465905	1.196265
56	0.24937016	9.01559930	2.24822144		56.00000000	0.61321429	5.52849429	1.217631
57	0.25952283	9.01256370	2.33896604		57.00000000	0.60245614	5.42967434	1.239025
58	0.26937258	9.02961920	2.43233182		58.00000000	0.59206897	5.34615730	1.260506
59	0.27950439	9.01603510	2.52002139		59.00000000	0.58203390	5.24763806	1.281887
60	0.28930056	9.01690770	2.60859645		60.00000000	0.57233333	5.16067684	1.303235
61	0.29946736	9.01827430	2.70067880		61.00000000	0.56295082	5.07684491	1.324620
62	0.30928063	9.01360700	2.78773405		62.00000000	0.55387097	4.99237523	1.346105
63	0.31944522	9.01902870	2.88108561		63.00000000	0.54507937	4.91608644	1.367478
64	0.32923689	9.02193070	2.97035241		64.00000000	0.53656250	4.84082969	1.388832
65	0.33940148	9.00966840	3.05789479		65.00000000	0.52830769	4.75987712	1.410208
66	0.34923634	9.02323440	3.15124136		66.00000000	0.52030303	4.69481620	1.431693
67	0.35936445	9.00906280	3.23753690		67.00000000	0.51253731	4.61748084	1.453069
68	0.36953348	9.01018240	3.32956406		68.00000000	0.50500000	4.55014211	1.474429
69	0.37935793	9.00335880	3.41549556		69.00000000	0.49768116	4.48080205	1.495798
70	0.38948750	9.01535420	3.51136777		70.00000000	0.49057143	4.42267519	1.517287
71	0.39932314	9.01186470	3.59864611		71.00000000	0.48366197	4.35869625	1.538683
72	0.40946388	9.01930240	3.69307856		72.00000000	0.47694444	4.30170617	1.560028
73	0.41928685	9.00246240	3.77461410		73.00000000	0.47041096	4.23485697	1.581410
74	0.42943728	9.01528930	3.87150132		74.00000000	0.46405405	4.18358155	1.602889
75	0.43924311	8.99825670	3.95242226		75.00000000	0.45786667	4.12000180	1.624258
76	0.44937044	9.00469880	4.04644546		76.00000000	0.45184211	4.06870206	1.645637
77	0.45952535	8.99764920	4.13464790		77.00000000	0.44597403	4.01271784	1.667019
78	0.46938404	8.99712560	4.22310716		78.00000000	0.44025641	3.96104222	1.688500
79	0.47955605	8.98984240	4.31113331		79.00000000	0.43468354	3.90773656	1.709878
80	0.48937824	8.97894670	4.39410113		80.00000000	0.42925000	3.85421287	1.731238
81	0.49946767	8.97063450	4.48054191		81.00000000	0.42395062	3.80310603	1.752596
82	0.50933379	8.94168660	4.55430312		82.00000000	0.41878049	3.74460388	1.774072
83	0.51946265	8.91794300	4.63253830		83.00000000	0.41373494	3.68966461	1.795444
84	0.52923572	8.87834930	4.69873958		84.00000000	0.40880952	3.62955375	1.816825
85	0.53934520	8.82766720	4.76115993		85.00000000	0.40400000	3.56637755	1.838191
86	0.54951054	8.73080440	4.79766904		86.00000000	0.39930233	3.48623050	1.859674
87	0.55931783	8.64623170	4.83599155		87.00000000	0.39471264	3.41277697	1.881043
88	0.56948990	8.48405930	4.83158608		88.00000000	0.39022727	3.31071132	1.902436
89	0.57926518	8.27789880	4.79509854		89.00000000	0.38584270	3.19396680	1.923915
90	0.58939850	7.98843290	4.70837037		90.00000000	0.38155556	3.04803095	1.945292
91	0.59918946	7.61289410	4.56156590		91.00000000	0.37736264	2.87282180	1.966649
92	0.60928255	7.09950020	4.32560159		92.00000000	0.37326087	2.64996562	1.988124
93	0.61911666	6.43731260	3.98544748		93.00000000	0.36924731	2.37696037	2.009637
94	0.62924999	5.58356430	3.51345778		94.00000000	0.36531915	2.03978296	2.031018
95	0.63935798	4.48562530	2.86792033		95.00000000	0.36147368	1.62143550	2.052355
96	0.64914000	3.18723650	2.06896270		96.00000000	0.35770833	1.14010106	2.073742
97	0.65924954	1.54233990	1.01678687		97.00000000	0.35402062	0.54602013	2.095257
98	0.66897422	-0.34634417	-0.23169532		98.00000000	0.35040816	-0.12136182	2.116649
99	0.67908818	-2.65969010	-1.80616411		99.00000000	0.34686869	-0.92256321	2.138014
100	0.68877792	-5.27440120	-3.63289109		100.00000000	0.34340000	-1.81122937	2.159398
101	0.69909060	-8.43283460	-5.89531540		101.00000000	0.34000000	-2.86716376	2.180880
20:59 02/04/2018
Test Lot:	JK-PERC
Recipe:	Recipe_YJX-LID
Cell Name:	1-20-6h
Test Order:	3
Test Condition:	Light
1	-0.29986683	9.01783560	-2.70414977		1.00000000	34.34000000	309.67247450	0.000000
2	-0.29001844	9.01916890	-2.61572529		2.00000000	17.17000000	154.85913001	0.061793
3	-0.27988276	9.01233480	-2.52239714		3.00000000	11.44666667	103.16119234	0.083249
4	-0.27005002	9.03429990	-2.43971287		4.00000000	8.58500000	77.55946464	0.104744
5	-0.25990465	9.01278690	-2.34246522		5.00000000	6.86800000	61.89982043	0.126138
6	-0.24972954	9.02337460	-2.25340319		6.00000000	5.72333333	51.64378063	0.147490
7	-0.23992060	9.01915550	-2.16388120		7.00000000	4.90571429	44.24539998	0.168862
8	-0.22977003	9.00517180	-2.06911859		8.00000000	4.29250000	38.65469995	0.190345
9	-0.21994101	9.02737810	-1.98549066		9.00000000	3.81555556	34.44446266	0.211719
10	-0.20981723	9.01727290	-1.89197922		10.00000000	3.43400000	30.96531514	0.233098
11	-0.19996810	9.01232150	-1.80217681		11.00000000	3.12181818	28.13482912	0.254461
12	-0.18983316	9.02673530	-1.71357369		12.00000000	2.86166667	25.83150752	0.275939
13	-0.18004805	9.01251980	-1.62268662		13.00000000	2.64153846	23.80691769	0.297330
14	-0.16992205	9.01899150	-1.53252552		14.00000000	2.45285714	22.12229772	0.318716
15	-0.16008632	9.02309040	-1.44447334		15.00000000	2.28933333	20.65686162	0.340137
16	-0.14994022	9.02012830	-1.35248002		16.00000000	2.14625000	19.35945036	0.361615
17	-0.13980082	9.01230340	-1.25992741		17.00000000	2.02000000	18.20485287	0.382990
18	-0.12998518	9.01422210	-1.17171528		18.00000000	1.90777778	17.19713261	0.404357
19	-0.11981750	9.02411370	-1.08124674		19.00000000	1.80736842	16.30989813	0.425726
20	-0.11003238	9.01565740	-0.99201424		20.00000000	1.71700000	15.47988376	0.447221
21	-0.09985353	9.02290340	-0.90096876		21.00000000	1.63523810	14.75459537	0.468603
22	-0.09003343	9.01926710	-0.81203553		22.00000000	1.56090909	14.07825601	0.489979
23	-0.07987989	9.02399160	-0.72083543		23.00000000	1.49304348	13.47321181	0.511353
24	-0.07011709	9.02184580	-0.63258561		24.00000000	1.43083333	12.90875770	0.532823
25	-0.05995164	9.00894550	-0.54010109		25.00000000	1.37360000	12.37468754	0.554216
26	-0.04977875	9.01818080	-0.44891379		26.00000000	1.32076923	11.91093572	0.575605
27	-0.03995046	9.00734810	-0.35984774		27.00000000	1.27185185	11.45601236	0.596960
28	-0.02983860	9.00992970	-0.26884372		28.00000000	1.22642857	11.05003521	0.618437
29	-0.02000659	9.03668500	-0.18079328		29.00000000	1.18413793	10.70068148	0.639809
30	-0.00985901	9.00467970	-0.08877718		30.00000000	1.14466667	10.30735670	0.661197
31	-0.00060903	9.03447060	-0.00550223		31.00000000	1.10774194	10.00786195	0.682809
32	0.00952049	9.00195980	0.08570307		32.00000000	1.07312500	9.66022811	0.704189
33	0.01932170	9.02333930	0.17434629		33.00000000	1.04060606	9.38974156	0.725555
34	0.02950101	9.02311420	0.26619095		34.00000000	1.01000000	9.11334534	0.746941
35	0.03932976	8.99777030	0.35388015		35.00000000	0.98114286	8.82809806	0.768419
36	0.04948003	9.03550150	0.44707690		36.00000000	0.95388889	8.61886449	0.789816
37	0.05927753	9.01471140	0.53436980		37.00000000	0.92810811	8.36662674	0.811162
38	0.06947097	9.01985450	0.62661806		38.00000000	0.90368421	8.15110009	0.832542
39	0.07956468	9.01685240	0.71742300		39.00000000	0.88051282	7.93945414	0.854029
40	0.08940014	9.02603630	0.80692886		40.00000000	0.85850000	7.74885216	0.875418
41	0.09955264	9.01852420	0.89781788		41.00000000	0.83756098	7.55356393	0.896777
42	0.10938660	9.01225470	0.98581990		42.00000000	0.81761905	7.36859110	0.918153
43	0.11953018	9.01545910	1.07761945		43.00000000	0.79860465	7.19978757	0.939633
44	0.12932618	9.01493170	1.16586668		44.00000000	0.78045455	7.03574442	0.961011
45	0.13950475	9.00959110	1.25688075		45.00000000	0.76311111	6.87531907	0.982367
46	0.14928587	9.01889800	1.34639403		46.00000000	0.74652174	6.73280342	1.003736
47	0.15946889	9.01704410	1.43793801		47.00000000	0.73063830	6.58819775	1.025214
48	0.16961618	9.01437760	1.52898429		48.00000000	0.71541667	6.44903597	1.046589
49	0.17939954	9.01948930	1.61809223		49.00000000	0.70081633	6.32100536	1.067944
50	0.18956842	9.01422880	1.70881311		50.00000000	0.68680000	6.19097234	1.089328
51	0.19932573	9.00970460	1.79586595		51.00000000	0.67333333	6.06653443	1.110810
52	0.20948344	9.02227120	1.89001641		52.00000000	0.66038462	5.95816910	1.132192
53	0.21930623	9.01147170	1.97627189		53.00000000	0.64792453	5.83875355	1.153573
54	0.22943196	9.01027680	2.06724547		54.00000000	0.63592593	5.72986862	1.174942
55	0.23928675	9.01791860	2.15786843		55.00000000	0.62436364	5.63046045	1.196409
56	0.24941246	9.02267170	2.25036674		56.00000000	0.61321429	5.53283118	1.217789
57	0.25957614	9.01105980	2.33905612		57.00000000	0.60245614	5.42876831	1.239175
58	0.26938108	9.02223300	2.43041887		58.00000000	0.59206897	5.34178416	1.260544
59	0.27952316	9.01519200	2.51995496		59.00000000	0.58203390	5.24714734	1.282029
60	0.28935042	9.01923560	2.60971961		60.00000000	0.57233333	5.16200918	1.303401
61	0.29948211	9.00247190	2.69607928		61.00000000	0.56295082	5.06794894	1.324794
62	0.30934954	9.01997280	2.79032444		62.00000000	0.55387097	4.99590106	1.346281
63	0.31944847	9.01743130	2.88060463		63.00000000	0.54507937	4.91521573	1.367655
64	0.32929063	9.01289080	2.96786049		64.00000000	0.53656250	4.83597922	1.389024
65	0.33943346	9.01705740	3.06069099		65.00000000	0.52830769	4.76378079	1.410408
66	0.34924880	9.01186940	3.14738457		66.00000000	0.52030303	4.68890296	1.431878
67	0.35943407	9.00754830	3.23761975		67.00000000	0.51253731	4.61670461	1.453264
68	0.36959773	9.01352980	3.33138015		68.00000000	0.50500000	4.55183255	1.474605
69	0.37942573	9.01405050	3.42016269		69.00000000	0.49768116	4.48612310	1.495985
70	0.38955444	9.01477150	3.51174426		70.00000000	0.49057143	4.42238933	1.517467
71	0.39937350	9.00833420	3.59768996		71.00000000	0.48366197	4.35698868	1.538848
72	0.40950966	9.00498490	3.68762830		72.00000000	0.47694444	4.29487752	1.560208
73	0.41931757	9.00812720	3.77726601		73.00000000	0.47041096	4.23752175	1.581597
74	0.42946115	9.01449110	3.87137371		74.00000000	0.46405405	4.18321114	1.603067
75	0.43929586	8.99191470	3.95011090		75.00000000	0.45786667	4.11709801	1.624447
76	0.44942528	8.99949930	4.04460249		76.00000000	0.45184211	4.06635271	1.645798
77	0.45961425	9.00168610	4.13730321		77.00000000	0.44597403	4.01451819	1.667175
78	0.46946982	8.98977850	4.22042969		78.00000000	0.44025641	3.95780761	1.688657
79	0.47959030	8.98427960	4.30877335		79.00000000	0.43468354	3.90531850	1.710035
80	0.48942649	8.97910790	4.39461326		80.00000000	0.42925000	3.85428207	1.731383
81	0.49953511	8.95882610	4.47524818		81.00000000	0.42395062	3.79809986	1.752766
82	0.50935417	8.93610000	4.55163980		82.00000000	0.41878049	3.74226432	1.774247
83	0.51952231	8.91438960	4.63122428		83.00000000	0.41373494	3.68819444	1.795678
84	0.52926397	8.87467290	4.69704461		84.00000000	0.40880952	3.62805080	1.817057
85	0.53940535	8.82413100	4.75978347		85.00000000	0.40400000	3.56494892	1.838426
86	0.54955113	8.73686500	4.80135403		86.00000000	0.39930233	3.48865051	1.859891
87	0.55939555	8.63722800	4.83162691		87.00000000	0.39471264	3.40922310	1.881268
88	0.56951231	8.47068120	4.82415722		88.00000000	0.39022727	3.30549082	1.902646
89	0.57932019	8.27442740	4.79354285		89.00000000	0.38584270	3.19262738	1.924008
90	0.58945113	7.98292110	4.70554186		90.00000000	0.38155556	3.04592790	1.945493
91	0.59924042	7.59367660	4.55043796		91.00000000	0.37736264	2.86556983	1.966867
92	0.60935646	7.08483980	4.31719290		92.00000000	0.37326087	2.64449346	1.988362
93	0.61915922	6.42612460	3.97879429		93.00000000	0.36924731	2.37282923	2.009879
94	0.62926185	5.55774780	3.49727866		94.00000000	0.36531915	2.03035170	2.031256
95	0.63939351	4.47228810	2.85955199		95.00000000	0.36147368	1.61661446	2.052616
96	0.64916271	3.17029480	2.05803716		96.00000000	0.35770833	1.13404087	2.074048
97	0.65927356	1.53162440	1.00975947		97.00000000	0.35402062	0.54222662	2.095545
98	0.66898471	-0.36237362	-0.24242241		98.00000000	0.35040816	-0.12697867	2.116939
99	0.67909628	-2.64944080	-1.79922539		99.00000000	0.34686869	-0.91900805	2.138299
100	0.68881267	-5.25337790	-3.61859326		100.00000000	0.34340000	-1.80400997	2.159677
101	0.69908947	-8.36176010	-5.84561844		101.00000000	0.34000000	-2.84299843	2.181151
20:59 02/04/2018
Test Lot:	JK-PERC
Recipe:	Recipe_YJX-LID
Cell Name:	1-20-6h
Test Order:	4
Test Condition:	Light
1	-0.29987639	9.02605440	-2.70670061		1.00000000	34.34000000	309.95470810	0.000000
2	-0.29008755	9.01239490	-2.61438356		2.00000000	17.17000000	154.74282043	0.061775
3	-0.27995336	9.02376650	-2.52623375		3.00000000	11.44666667	103.29204720	0.083186
4	-0.27010053	9.01237200	-2.43424645		4.00000000	8.58500000	77.37121362	0.104667
5	-0.25995815	9.03161050	-2.34784076		5.00000000	6.86800000	62.02910091	0.126042
6	-0.24979569	9.01204780	-2.25117070		6.00000000	5.72333333	51.57895358	0.147387
7	-0.23996741	9.01645180	-2.16365459		7.00000000	4.90571429	44.23213640	0.168763
8	-0.22986448	9.01462940	-2.07214310		8.00000000	4.29250000	38.69529670	0.190246
9	-0.22001684	9.01822280	-1.98416088		9.00000000	3.81555556	34.40953011	0.211671
10	-0.20986776	9.01014520	-1.89093899		10.00000000	3.43400000	30.94083862	0.233044
11	-0.20003353	9.01788230	-1.80387883		11.00000000	3.12181818	28.15218893	0.254417
12	-0.18989487	9.01945590	-1.71274841		12.00000000	2.86166667	25.81067630	0.275902
13	-0.18011124	9.01572610	-1.62383361		13.00000000	2.64153846	23.81538725	0.297296
14	-0.16992943	9.01751520	-1.53234122		14.00000000	2.45285714	22.11867657	0.318646
15	-0.16011603	9.01010040	-1.44266151		15.00000000	2.28933333	20.62712318	0.340016
16	-0.14999226	9.02892880	-1.35426944		16.00000000	2.14625000	19.37833844	0.361500
17	-0.13981490	9.01182270	-1.25998709		17.00000000	2.02000000	18.20388185	0.382887
18	-0.12998661	9.02284050	-1.17284845		18.00000000	1.90777778	17.21357460	0.404253
19	-0.11987551	9.01569750	-1.08076134		19.00000000	1.80736842	16.29468696	0.425613
20	-0.11005317	9.02309420	-0.99302012		20.00000000	1.71700000	15.49265274	0.447093
21	-0.09986094	9.01401520	-0.90014799		21.00000000	1.63523810	14.74006105	0.468477
22	-0.09006465	9.00862980	-0.81135911		22.00000000	1.56090909	14.06165215	0.489863
23	-0.07992525	9.03460410	-0.72209303		23.00000000	1.49304348	13.48905673	0.511209
24	-0.07007911	9.00605680	-0.63113645		24.00000000	1.43083333	12.88616627	0.532675
25	-0.05994865	9.02158740	-0.54083195		25.00000000	1.37360000	12.39205245	0.554047
26	-0.04978394	9.01851650	-0.44897729		26.00000000	1.32076923	11.91137910	0.575426
27	-0.03998766	9.01089950	-0.36032479		27.00000000	1.27185185	11.46052922	0.596913
28	-0.02981552	9.01101490	-0.26866807		28.00000000	1.22642857	11.05136613	0.618289
29	-0.02003263	9.00996490	-0.18049332		29.00000000	1.18413793	10.66904120	0.639637
30	-0.00990961	9.00613690	-0.08924732		30.00000000	1.14466667	10.30902470	0.661019
31	-0.00068122	9.02614780	-0.00614880		31.00000000	1.10774194	9.99864243	0.682611
32	0.00946020	9.01978970	0.08532903		32.00000000	1.07312500	9.67936182	0.703994
33	0.01930681	9.01070120	0.17396791		33.00000000	1.04060606	9.37659028	0.725360
34	0.02943178	9.01128200	0.26521806		34.00000000	1.01000000	9.10139482	0.746733
35	0.03924341	9.02664180	0.35423621		35.00000000	0.98114286	8.85642513	0.768202
36	0.04941452	9.02713110	0.44607134		36.00000000	0.95388889	8.61088005	0.789580
37	0.05923657	9.00767900	0.53358402		37.00000000	0.92810811	8.36009992	0.810927
38	0.06936154	9.01308250	0.62516126		38.00000000	0.90368421	8.14498034	0.832302
39	0.07953339	9.02162550	0.71752047		39.00000000	0.88051282	7.94365691	0.853785
40	0.08935618	9.01910400	0.80591272		40.00000000	0.85850000	7.74290078	0.875148
41	0.09950274	9.01765540	0.89728138		41.00000000	0.83756098	7.55283625	0.896524
42	0.10930990	9.01203440	0.98510458		42.00000000	0.81761905	7.36841098	0.917905
43	0.11948622	9.00773910	1.07630070		43.00000000	0.79860465	7.19362234	0.939377
44	0.12928893	9.01954460	1.16612727		44.00000000	0.78045455	7.03934458	0.960772
45	0.13944812	9.01169400	1.25666379		45.00000000	0.76311111	6.87692382	0.982104
46	0.14925976	9.01624010	1.34576183		46.00000000	0.74652174	6.73081924	1.003480
47	0.15945692	8.99962810	1.43505298		47.00000000	0.73063830	6.57547296	1.024955
48	0.16958858	9.02410890	1.53038581		48.00000000	0.71541667	6.45599791	1.046316
49	0.17938904	9.00327300	1.61508850		49.00000000	0.70081633	6.30964071	1.067681
50	0.18954378	9.02146340	1.70996227		50.00000000	0.68680000	6.19594106	1.089046
51	0.19930853	9.02123830	1.79800974		51.00000000	0.67333333	6.07430046	1.110516
52	0.20950048	9.00768380	1.88711408		52.00000000	0.66038462	5.94853580	1.131892
53	0.21928011	9.01459980	1.97672244		53.00000000	0.64792453	5.84078032	1.153279
54	0.22944750	9.01244160	2.06788219		54.00000000	0.63592593	5.73124527	1.174630
55	0.23925391	9.01872160	2.15776441		55.00000000	0.62436364	5.63096181	1.196094
56	0.24939227	9.02664850	2.25117636		56.00000000	0.61321429	5.53526981	1.217473
57	0.25954702	9.01327990	2.33936994		57.00000000	0.60245614	5.43010582	1.238848
58	0.26937056	9.00535770	2.42577825		58.00000000	0.59206897	5.33179282	1.260331
59	0.27952901	9.02617650	2.52307818		59.00000000	0.58203390	5.25354070	1.281713
60	0.28936595	9.01548580	2.60877461		60.00000000	0.57233333	5.15986304	1.303057
61	0.29949611	9.02340790	2.70247556		61.00000000	0.56295082	5.07973487	1.324433
62	0.30930179	9.01719000	2.78903301		62.00000000	0.55387097	4.99435975	1.345919
63	0.31945133	9.01180460	2.87883297		63.00000000	0.54507937	4.91214873	1.367304
64	0.32925701	9.01450250	2.96808814		64.00000000	0.53656250	4.83684400	1.388667
65	0.33940208	9.01356700	3.05922339		65.00000000	0.52830769	4.76193678	1.410042
66	0.34924272	9.02144050	3.15067242		66.00000000	0.52030303	4.69388283	1.431528
67	0.35939226	9.00073340	3.23479392		67.00000000	0.51253731	4.61321172	1.452920
68	0.36953881	9.01777740	3.33241873		68.00000000	0.50500000	4.55397759	1.474264
69	0.37935042	9.02095130	3.42210166		69.00000000	0.49768116	4.48955750	1.495646
70	0.38951185	9.00430580	3.50728381		70.00000000	0.49057143	4.41725516	1.517112
71	0.39931160	9.00354670	3.59522064		71.00000000	0.48366197	4.35467315	1.538482
72	0.40947750	9.02493000	3.69550577		72.00000000	0.47694444	4.30439023	1.559842
73	0.41929731	8.99792770	3.77280688		73.00000000	0.47041096	4.23272380	1.581217
74	0.42942524	9.01103500	3.86956587		74.00000000	0.46405405	4.18160732	1.602688
75	0.43925473	9.00463490	3.95532847		75.00000000	0.45786667	4.12292217	1.624073
76	0.44940650	9.00367360	4.04630944		76.00000000	0.45184211	4.06823883	1.645432
77	0.45955899	8.99968340	4.13588541		77.00000000	0.44597403	4.01362504	1.666821
78	0.46942273	8.98801610	4.21917905		78.00000000	0.44025641	3.95703170	1.688300
79	0.47954845	8.98539830	4.30893383		79.00000000	0.43468354	3.90580478	1.709680
80	0.48939058	8.96771620	4.38871583		80.00000000	0.42925000	3.84939218	1.731055
81	0.49952152	8.96943190	4.48042426		81.00000000	0.42395062	3.80259619	1.752416
82	0.50933987	8.93348980	4.55018253		82.00000000	0.41878049	3.74117122	1.773903
83	0.51947153	8.91872880	4.63302570		83.00000000	0.41373494	3.68998972	1.795289
84	0.52927345	8.87683870	4.69827504		84.00000000	0.40880952	3.62893620	1.816664
85	0.53938133	8.81972410	4.75719452		85.00000000	0.40400000	3.56316854	1.838001
86	0.54952413	8.74327850	4.80464251		86.00000000	0.39930233	3.49121144	1.859472
87	0.55934095	8.63435750	4.82954973		87.00000000	0.39471264	3.40809008	1.880853
88	0.56950760	8.47799590	4.82828310		88.00000000	0.39022727	3.30834522	1.902234
89	0.57932371	8.26962380	4.79078914		89.00000000	0.38584270	3.19077395	1.923718
90	0.58945537	7.97761920	4.70245048		90.00000000	0.38155556	3.04390493	1.945089
91	0.59922236	7.61470990	4.56290444		91.00000000	0.37736264	2.87350701	1.966447
92	0.60938007	7.08078960	4.31489206		92.00000000	0.37326087	2.64298168	1.987919
93	0.61914629	6.44337180	3.98938975		93.00000000	0.36924731	2.37919772	2.009418
94	0.62926310	5.56455040	3.50156623		94.00000000	0.36531915	2.03283682	2.030814
95	0.63938361	4.48123740	2.86522975		95.00000000	0.36147368	1.61984939	2.052158
96	0.64915878	3.17553350	2.06142545		96.00000000	0.35770833	1.13591480	2.073525
97	0.65928817	1.53072350	1.00918790		97.00000000	0.35402062	0.54190768	2.095011
98	0.66899484	-0.36414006	-0.24360782		98.00000000	0.35040816	-0.12759765	2.116389
99	0.67908859	-2.66555070	-1.81014507		99.00000000	0.34686869	-0.92459607	2.137741
100	0.68885255	-5.28782320	-3.64253050		100.00000000	0.34340000	-1.81583849	2.159114
101	0.69911003	-8.42361070	-5.88903073		101.00000000	0.34000000	-2.86402764	2.180596
