# Supplementary material for: Study on the Electrical Injection Regeneration of Industrialized B-Doped Czochralski Silicon PERC Solar Cells
Source: Hindawi journal article supplement (doi:10.1155/2019/5357370), 2019-06-20
Supplement: f1 [file 5357370.f1.zip › section3.2/IVRawData_1-20-7h.csv]

22:02 02/04/2018
Test Lot:	JK-PERC
Recipe:	Recipe_YJX-LID
Cell Name:	1-20-7h
Test Order:	2
Test Condition:	Light
1	-0.29985827	9.02590180	-2.70649130		1.00000000	34.34000000	309.94946781	0.000000
2	-0.29007530	9.03002070	-2.61938596		2.00000000	17.17000000	155.04545542	0.061761
3	-0.27994549	9.02977560	-2.52784495		3.00000000	11.44666667	103.36083137	0.083163
4	-0.27015731	9.02459050	-2.43805909		4.00000000	8.58500000	77.47610944	0.104678
5	-0.25995156	9.03198150	-2.34787768		5.00000000	6.86800000	62.03164894	0.126076
6	-0.24982028	9.04428770	-2.25944649		6.00000000	5.72333333	51.76347327	0.147448
7	-0.23998371	9.02852730	-2.16669948		7.00000000	4.90571429	44.29137535	0.168805
8	-0.22984943	9.04138090	-2.07815625		8.00000000	4.29250000	38.81012751	0.190280
9	-0.22003669	9.02155490	-1.98507308		9.00000000	3.81555556	34.42224392	0.211693
10	-0.20986967	9.03534600	-1.89624508		10.00000000	3.43400000	31.02737816	0.233074
11	-0.20004873	9.02659130	-1.80575813		11.00000000	3.12181818	28.17937684	0.254432
12	-0.18991074	9.02223210	-1.71341877		12.00000000	2.86166667	25.81862086	0.275905
13	-0.18011437	9.02949330	-1.62634150		13.00000000	2.64153846	23.85175384	0.297284
14	-0.16998233	9.03016280	-1.53496811		14.00000000	2.45285714	22.14969933	0.318690
15	-0.16015916	9.02150820	-1.44487718		15.00000000	2.28933333	20.65323944	0.340169
16	-0.15002935	9.02764130	-1.35441116		16.00000000	2.14625000	19.37557514	0.361542
17	-0.13984148	9.02879910	-1.26260063		17.00000000	2.02000000	18.23817418	0.382894
18	-0.13007638	9.01989940	-1.17327586		18.00000000	1.90777778	17.20796363	0.404259
19	-0.11990563	9.02530770	-1.08218521		19.00000000	1.80736842	16.31205613	0.425745
20	-0.11005046	9.03067680	-0.99383014		20.00000000	1.71700000	15.50567207	0.447124
21	-0.09990353	9.02364440	-0.90149394		21.00000000	1.63523810	14.75580708	0.468472
22	-0.09006473	9.03111080	-0.81338459		22.00000000	1.56090909	14.09674295	0.489848
23	-0.07995502	9.02220540	-0.72137060		23.00000000	1.49304348	13.47054493	0.511314
24	-0.07009985	9.04180150	-0.63382896		24.00000000	1.43083333	12.93731098	0.532695
25	-0.05994325	9.01528840	-0.54040567		25.00000000	1.37360000	12.38340015	0.554062
26	-0.04978441	9.03138070	-0.44962197		26.00000000	1.32076923	11.92836974	0.575437
27	-0.04001409	9.01741790	-0.36082379		27.00000000	1.27185185	11.46881966	0.596904
28	-0.02985004	9.03200530	-0.26960573		28.00000000	1.22642857	11.07710936	0.618293
29	-0.02003358	9.01894950	-0.18068182		29.00000000	1.18413793	10.67968020	0.639644
30	-0.00988069	9.03086380	-0.08923120		30.00000000	1.14466667	10.33732876	0.661016
31	-0.00064180	9.01167490	-0.00578369		31.00000000	1.10774194	9.98261020	0.682614
32	0.00948334	9.03405570	0.08567301		32.00000000	1.07312500	9.69467102	0.703987
33	0.01928166	9.03112890	0.17413517		33.00000000	1.04060606	9.39784747	0.725352
34	0.02944989	9.03313640	0.26602484		34.00000000	1.01000000	9.12346776	0.746728
35	0.03926756	9.02805520	0.35450969		35.00000000	0.98114286	8.85781187	0.768204
36	0.04941122	9.01600930	0.44549204		36.00000000	0.95388889	8.60027109	0.789599
37	0.05919243	9.03351210	0.53471551		37.00000000	0.92810811	8.38407582	0.810969
38	0.06936289	9.02224730	0.62580911		38.00000000	0.90368421	8.15326243	0.832327
39	0.07947975	9.01870920	0.71680479		39.00000000	0.88051282	7.94108908	0.853796
40	0.08933464	9.03236390	0.80690295		40.00000000	0.85850000	7.75428441	0.875168
41	0.09946937	9.01950840	0.89716483		41.00000000	0.83756098	7.55438826	0.896547
42	0.10927811	9.02879430	0.98664958		42.00000000	0.81761905	7.38211420	0.917906
43	0.11946420	9.01924320	1.07747667		43.00000000	0.79860465	7.20280957	0.939375
44	0.12928486	9.02415280	1.16668633		44.00000000	0.78045455	7.04294107	0.960757
45	0.13940991	9.01817040	1.25722232		45.00000000	0.76311111	6.88186603	0.982146
46	0.14923726	9.02693370	1.34715485		46.00000000	0.74652174	6.73880224	1.003625
47	0.15940325	9.04193500	1.44131383		47.00000000	0.73063830	6.60638400	1.025011
48	0.16955361	9.01432900	1.52841202		48.00000000	0.71541667	6.44900121	1.046360
49	0.17933482	9.03697490	1.62064427		49.00000000	0.70081633	6.33325955	1.067731
50	0.18951868	9.01931860	1.70932936		50.00000000	0.68680000	6.19446801	1.089218
51	0.19926341	9.02797790	1.79894566		51.00000000	0.67333333	6.07883845	1.110617
52	0.20947555	9.02462670	1.89043864		52.00000000	0.66038462	5.95972463	1.131956
53	0.21927238	9.02119260	1.97809837		53.00000000	0.64792453	5.84505196	1.153327
54	0.22942124	9.01769160	2.06884999		54.00000000	0.63592593	5.73458388	1.174803
55	0.23928134	9.03114410	2.16098426		55.00000000	0.62436364	5.63871797	1.196174
56	0.24940938	9.02397160	2.25066316		56.00000000	0.61321429	5.53362830	1.217548
57	0.25952625	9.02558520	2.34237628		57.00000000	0.60245614	5.43751922	1.238925
58	0.26938114	9.01693060	2.42899104		58.00000000	0.59206897	5.33864477	1.260393
59	0.27949801	9.01779650	2.52045618		59.00000000	0.58203390	5.24866325	1.281782
60	0.28934693	9.02747440	2.61207200		60.00000000	0.57233333	5.16672451	1.303189
61	0.29948911	9.02403160	2.70259919		61.00000000	0.56295082	5.08008599	1.324594
62	0.30931273	9.01838870	2.78950243		62.00000000	0.55387097	4.99502368	1.346083
63	0.31941697	9.01721760	2.88025232		63.00000000	0.54507937	4.91509924	1.367452
64	0.32925397	9.01276020	2.96748708		64.00000000	0.53656250	4.83590914	1.388804
65	0.33943188	9.04554750	3.07034719		65.00000000	0.52830769	4.77883233	1.410172
66	0.34920117	9.01167490	3.14688742		66.00000000	0.52030303	4.68880176	1.431659
67	0.35939470	9.01319220	3.23929351		67.00000000	0.51253731	4.61959732	1.453048
68	0.36954582	9.01417830	3.33115191		68.00000000	0.50500000	4.55216004	1.474410
69	0.37937689	9.02834700	3.42514621		69.00000000	0.49768116	4.49323820	1.495775
70	0.38948110	9.01540660	3.51133048		70.00000000	0.49057143	4.42270089	1.517249
71	0.39932927	9.01665500	3.60061426		71.00000000	0.48366197	4.36101314	1.538622
72	0.40948188	9.01952170	3.69333070		72.00000000	0.47694444	4.30181077	1.560007
73	0.41929585	9.01683330	3.78072078		73.00000000	0.47041096	4.24161720	1.581360
74	0.42944098	9.01843260	3.87288453		74.00000000	0.46405405	4.18504021	1.602834
75	0.43926239	9.01887990	3.96165474		75.00000000	0.45786667	4.12944448	1.624214
76	0.44936511	9.00862120	4.04816006		76.00000000	0.45184211	4.07047437	1.645602
77	0.45956236	9.00630470	4.13895864		77.00000000	0.44597403	4.01657797	1.667077
78	0.46941426	9.00385670	4.22653873		78.00000000	0.44025641	3.96400563	1.688475
79	0.47955346	8.99460980	4.31339625		79.00000000	0.43468354	3.90980887	1.709818
80	0.48935032	8.98580460	4.39720636		80.00000000	0.42925000	3.85715662	1.731188
81	0.49951482	8.97220520	4.48174947		81.00000000	0.42395062	3.80377193	1.752672
82	0.50932354	8.96097760	4.56403683		82.00000000	0.41878049	3.75268257	1.774057
83	0.51943672	8.92929460	4.63820350		83.00000000	0.41373494	3.69436116	1.795404
84	0.52925885	8.88982300	4.70501750		84.00000000	0.40880952	3.63424431	1.816799
85	0.53939134	8.82499120	4.76012383		85.00000000	0.40400000	3.56529644	1.838282
86	0.54953426	8.76780890	4.81821138		86.00000000	0.39930233	3.50100648	1.859663
87	0.55937129	8.63394070	4.82957855		87.00000000	0.39471264	3.40792556	1.881024
88	0.56946433	8.48578360	4.83235107		88.00000000	0.39022727	3.31138419	1.902393
89	0.57930583	8.27956960	4.79640294		89.00000000	0.38584270	3.19461146	1.923872
90	0.58940929	7.98019840	4.70360307		90.00000000	0.38155556	3.04488903	1.945270
91	0.59923291	7.63132380	4.57294037		91.00000000	0.37736264	2.87977648	1.966616
92	0.60934907	7.08621600	4.31797913		92.00000000	0.37326087	2.64500715	1.988087
93	0.61913174	6.43605230	3.98476426		93.00000000	0.36924731	2.37649501	2.009597
94	0.62924713	5.58010150	3.51126285		94.00000000	0.36531915	2.03851793	2.031016
95	0.63936919	4.46937270	2.85757920		95.00000000	0.36147368	1.61556062	2.052396
96	0.64914668	3.17823120	2.06313823		96.00000000	0.35770833	1.13687979	2.073786
97	0.65926355	1.53292510	1.01060164		97.00000000	0.35402062	0.54268709	2.095269
98	0.66897780	-0.36290392	-0.24277467		98.00000000	0.35040816	-0.12716450	2.116655
99	0.67908722	-2.67521760	-1.81670608		99.00000000	0.34686869	-0.92794922	2.138018
100	0.68878359	-5.28391080	-3.63947105		100.00000000	0.34340000	-1.81449497	2.159379
101	0.69902843	-8.42381480	-5.88848603		101.00000000	0.34000000	-2.86409703	2.180848
22:02 02/04/2018
Test Lot:	JK-PERC
Recipe:	Recipe_YJX-LID
Cell Name:	1-20-7h
Test Order:	3
Test Condition:	Light
1	-0.29983732	9.02929880	-2.70732075		1.00000000	34.34000000	310.06612079	0.000000
2	-0.29002979	9.02643970	-2.61793641		2.00000000	17.17000000	154.98396965	0.061803
3	-0.27990368	9.03076840	-2.52774531		3.00000000	11.44666667	103.37219562	0.083227
4	-0.27007011	9.02314380	-2.43688144		4.00000000	8.58500000	77.46368952	0.104714
5	-0.25990754	9.01863290	-2.34401069		5.00000000	6.86800000	61.93997076	0.126090
6	-0.24978073	9.02057550	-2.25316593		6.00000000	5.72333333	51.62776045	0.147435
7	-0.23993896	9.02021310	-2.16430055		7.00000000	4.90571429	44.25058826	0.168821
8	-0.22984190	9.02418040	-2.07413477		8.00000000	4.29250000	38.73629437	0.190315
9	-0.21997185	9.03285790	-1.98697446		9.00000000	3.81555556	34.46537114	0.211686
10	-0.20985173	9.01961230	-1.89278125		10.00000000	3.43400000	30.97334864	0.233046
11	-0.20001145	9.02161310	-1.80442592		11.00000000	3.12181818	28.16383580	0.254429
12	-0.18985261	9.02150820	-1.71275688		12.00000000	2.86166667	25.81654930	0.275900
13	-0.18010016	9.02567670	-1.62552582		13.00000000	2.64153846	23.84167214	0.297282
14	-0.16994654	9.03692820	-1.53579468		14.00000000	2.45285714	22.16629388	0.318629
15	-0.16013677	9.01046750	-1.44290716		15.00000000	2.28933333	20.62796360	0.340000
16	-0.14997868	9.03191850	-1.35459521		16.00000000	2.14625000	19.38475508	0.361490
17	-0.13986078	9.02237800	-1.26187682		17.00000000	2.02000000	18.22520356	0.382860
18	-0.13003390	9.02365780	-1.17338142		18.00000000	1.90777778	17.21513383	0.404235
19	-0.11989144	9.02092270	-1.08153141		19.00000000	1.80736842	16.30413082	0.425602
20	-0.11004297	9.03633590	-0.99438524		20.00000000	1.71700000	15.51538874	0.447079
21	-0.09986702	9.02204040	-0.90100433		21.00000000	1.63523810	14.75318416	0.468472
22	-0.09007438	9.02407170	-0.81283762		22.00000000	1.56090909	14.08575555	0.489857
23	-0.07994234	9.02649780	-0.72159934		23.00000000	1.49304348	13.47695367	0.511206
24	-0.07013407	9.02402970	-0.63289189		24.00000000	1.43083333	12.91188250	0.532682
25	-0.05996928	9.02769660	-0.54138443		25.00000000	1.37360000	12.40044405	0.554064
26	-0.04980077	9.02532200	-0.44946794		26.00000000	1.32076923	11.92036760	0.575454
27	-0.03998728	9.02684880	-0.36095914		27.00000000	1.27185185	11.48081436	0.596939
28	-0.02985301	9.01939870	-0.26925617		28.00000000	1.22642857	11.06164826	0.618325
29	-0.01999710	9.02518180	-0.18047745		29.00000000	1.18413793	10.68706010	0.639665
30	-0.00986580	9.02747250	-0.08906326		30.00000000	1.14466667	10.33344686	0.661049
31	-0.00062840	9.01887320	-0.00566747		31.00000000	1.10774194	9.99058405	0.682645
32	0.00952725	9.02732940	0.08600561		32.00000000	1.07312500	9.68745286	0.704032
33	0.01932185	9.01819900	0.17424825		33.00000000	1.04060606	9.38439254	0.725378
34	0.02947369	9.02214910	0.26591604		34.00000000	1.01000000	9.11237059	0.746751
35	0.03929806	9.02452090	0.35464617		35.00000000	0.98114286	8.85434422	0.768238
36	0.04947075	9.04016780	0.44722384		36.00000000	0.95388889	8.62331562	0.789610
37	0.05927353	9.02116970	0.53471657		37.00000000	0.92810811	8.37262074	0.810963
38	0.06944919	9.01765350	0.62626877		38.00000000	0.90368421	8.14911108	0.832347
39	0.07955415	9.02320860	0.71783367		39.00000000	0.88051282	7.94505085	0.853837
40	0.08937480	9.02760120	0.80684002		40.00000000	0.85850000	7.75019563	0.875225
41	0.09948943	9.01252170	0.89665063		41.00000000	0.83756098	7.54853647	0.896581
42	0.10931603	9.02056220	0.98609205		42.00000000	0.81761905	7.37538347	0.917952
43	0.11947011	9.03358270	1.07924312		43.00000000	0.79860465	7.21426116	0.939437
44	0.12934062	9.01764970	1.16634840		44.00000000	0.78045455	7.03786570	0.960816
45	0.13949768	9.03880120	1.26089180		45.00000000	0.76311111	6.89760963	0.982168
46	0.14926325	9.02658460	1.34733735		46.00000000	0.74652174	6.73854163	1.003547
47	0.15942106	9.01869110	1.43776929		47.00000000	0.73063830	6.58940111	1.025033
48	0.16957587	9.03288170	1.53175877		48.00000000	0.71541667	6.46227412	1.046415
49	0.17937493	9.03235240	1.62017758		49.00000000	0.70081633	6.33002003	1.067791
50	0.18953721	9.01732920	1.70911942		50.00000000	0.68680000	6.19310169	1.089154
51	0.19928938	9.03016950	1.79961688		51.00000000	0.67333333	6.08031413	1.110631
52	0.20945537	9.02487280	1.89030807		52.00000000	0.66038462	5.95988715	1.132013
53	0.21926634	9.02862930	1.97967450		53.00000000	0.64792453	5.84987038	1.153401
54	0.22941744	9.02684880	2.07091654		54.00000000	0.63592593	5.74040718	1.174777
55	0.23921055	9.01563930	2.15663604		55.00000000	0.62436364	5.62903734	1.196256
56	0.24941227	9.02521990	2.25100058		56.00000000	0.61321429	5.53439377	1.217635
57	0.25955445	9.02475930	2.34241644		57.00000000	0.60245614	5.43702166	1.239008
58	0.26937658	9.01108650	2.42737566		58.00000000	0.59206897	5.33518466	1.260498
59	0.27949938	9.03704830	2.52584940		59.00000000	0.58203390	5.25986845	1.281889
60	0.28934386	9.01924230	2.60966238		60.00000000	0.57233333	5.16201301	1.303242
61	0.29947487	9.01740650	2.70048664		61.00000000	0.56295082	5.07635638	1.324621
62	0.30930445	9.01700210	2.78899888		62.00000000	0.55387097	4.99425568	1.346103
63	0.31948754	9.02161980	2.88229512		63.00000000	0.54507937	4.91749879	1.367500
64	0.32927468	9.00757980	2.96596796		64.00000000	0.53656250	4.83312954	1.388850
65	0.33943325	9.04125600	3.06890291		65.00000000	0.52830769	4.77656509	1.410229
66	0.34924197	9.01622770	3.14884512		66.00000000	0.52030303	4.69117059	1.431706
67	0.35940647	9.01780510	3.24105750		67.00000000	0.51253731	4.62196160	1.453084
68	0.36955833	9.02943900	3.33690440		68.00000000	0.50500000	4.55986670	1.474436
69	0.37939608	9.01316740	3.41956038		69.00000000	0.49768116	4.48568360	1.495811
70	0.38952711	9.02498150	3.51547496		70.00000000	0.49057143	4.42739807	1.517288
71	0.39935520	9.01906010	3.60180855		71.00000000	0.48366197	4.36217639	1.538667
72	0.40950108	9.00908850	3.68923147		72.00000000	0.47694444	4.29683471	1.560032
73	0.41932842	9.02266500	3.78345986		73.00000000	0.47041096	4.24436049	1.581413
74	0.42946389	9.01451400	3.87140825		74.00000000	0.46405405	4.18322177	1.602890
75	0.43927041	9.01842120	3.96152558		75.00000000	0.45786667	4.12923445	1.624280
76	0.44942746	9.00245670	4.04595125		76.00000000	0.45184211	4.06768899	1.645623
77	0.45957783	9.01142880	4.14145289		77.00000000	0.44597403	4.01886318	1.667006
78	0.46944460	9.00673390	4.22816259		78.00000000	0.44025641	3.96527233	1.688486
79	0.47960094	8.99443820	4.31374102		79.00000000	0.43468354	3.90973428	1.709862
80	0.48940220	8.98815820	4.39882440		80.00000000	0.42925000	3.85816691	1.731233
81	0.49953026	8.97557160	4.48356961		81.00000000	0.42395062	3.80519912	1.752600
82	0.50934345	8.95802210	4.56270988		82.00000000	0.41878049	3.75144486	1.774080
83	0.51947445	8.91729550	4.63230718		83.00000000	0.41373494	3.68939672	1.795463
84	0.52928025	8.89178090	4.70624402		84.00000000	0.40880952	3.63504472	1.816846
85	0.53942460	8.81481840	4.75492989		85.00000000	0.40400000	3.56118663	1.838186
86	0.54952067	8.76047610	4.81406270		86.00000000	0.39930233	3.49807848	1.859651
87	0.55936438	8.65412040	4.84080669		87.00000000	0.39471264	3.41589074	1.881028
88	0.56950283	8.49121760	4.83577245		88.00000000	0.39022727	3.31350469	1.902406
89	0.57929742	8.29528140	4.80543511		89.00000000	0.38584270	3.20067374	1.923881
90	0.58941728	7.99430610	4.71198216		90.00000000	0.38155556	3.05027191	1.945266
91	0.59924984	7.63687710	4.57639738		91.00000000	0.37736264	2.88187208	1.966629
92	0.60932577	7.09860180	4.32536101		92.00000000	0.37326087	2.64963028	1.988107
93	0.61915904	6.45445390	3.99633348		93.00000000	0.36924731	2.38328975	2.009606
94	0.62925953	5.58384990	3.51369076		94.00000000	0.36531915	2.03988729	2.031042
95	0.63938683	4.51267190	2.88534298		95.00000000	0.36147368	1.63121214	2.052417
96	0.64917767	3.19208100	2.07222771		96.00000000	0.35770833	1.14183397	2.073807
97	0.65927744	1.55146110	1.02284330		97.00000000	0.35402062	0.54924922	2.095301
98	0.66900206	-0.36855364	-0.24656314		98.00000000	0.35040816	-0.12914420	2.116677
99	0.67909068	-2.69453070	-1.82983069		99.00000000	0.34686869	-0.93464833	2.138021
100	0.68883091	-5.35833550	-3.69098712		100.00000000	0.34340000	-1.84005241	2.159404
101	0.69910407	-8.54414270	-5.97324494		101.00000000	0.34000000	-2.90500852	2.180879
22:02 02/04/2018
Test Lot:	JK-PERC
Recipe:	Recipe_YJX-LID
Cell Name:	1-20-7h
Test Order:	4
Test Condition:	Light
1	-0.29987711	9.00472830	-2.70031190		1.00000000	34.34000000	309.22236982	0.000000
2	-0.29003108	9.02538870	-2.61764323		2.00000000	17.17000000	154.96592398	0.061789
3	-0.27993423	9.02519230	-2.52646026		3.00000000	11.44666667	103.30836786	0.083248
4	-0.27012691	9.02088450	-2.43678366		4.00000000	8.58500000	77.44429343	0.104734
5	-0.25994372	9.01895900	-2.34442175		5.00000000	6.86800000	61.94221041	0.126117
6	-0.24980445	9.03323750	-2.25654293		6.00000000	5.72333333	51.70022929	0.147463
7	-0.23998447	9.02386190	-2.16558672		7.00000000	4.90571429	44.26848824	0.168841
8	-0.22984520	9.02672100	-2.07474849		8.00000000	4.29250000	38.74719989	0.190318
9	-0.22002374	9.02450940	-1.98560631		9.00000000	3.81555556	34.43351698	0.211685
10	-0.20986809	9.03180410	-1.89548748		10.00000000	3.43400000	31.01521528	0.233035
11	-0.20007119	9.00885680	-1.80241270		11.00000000	3.12181818	28.12401296	0.254415
12	-0.18988876	9.05457590	-1.71936219		12.00000000	2.86166667	25.91117803	0.275889
13	-0.18012089	9.01037880	-1.62295745		13.00000000	2.64153846	23.80126215	0.297273
14	-0.16996002	9.02013400	-1.53306216		14.00000000	2.45285714	22.12510011	0.318613
15	-0.16015270	9.02280900	-1.44502722		15.00000000	2.28933333	20.65621740	0.339986
16	-0.14997622	9.02683450	-1.35381052		16.00000000	2.14625000	19.37384355	0.361462
17	-0.13983844	9.01625820	-1.26081948		17.00000000	2.02000000	18.21284156	0.382836
18	-0.12999986	9.02114200	-1.17274720		18.00000000	1.90777778	17.21033424	0.404177
19	-0.11986058	9.02053260	-1.08120627		19.00000000	1.80736842	16.30342576	0.425549
20	-0.11002052	9.01783560	-0.99214696		20.00000000	1.71700000	15.48362373	0.447016
21	-0.09986041	9.03399370	-0.90213829		21.00000000	1.63523810	14.77273065	0.468389
22	-0.09004043	9.01803400	-0.81198766		22.00000000	1.56090909	14.07633125	0.489782
23	-0.07991903	9.01927950	-0.72081202		23.00000000	1.49304348	13.46617644	0.511119
24	-0.07009235	9.02783390	-0.63278209		24.00000000	1.43083333	12.91732567	0.532581
25	-0.05993075	9.01337810	-0.54017854		25.00000000	1.37360000	12.38077616	0.553965
26	-0.04980413	9.02443410	-0.44945411		26.00000000	1.32076923	11.91919488	0.575345
27	-0.03998267	9.03011510	-0.36104810		27.00000000	1.27185185	11.48496861	0.596756
28	-0.02982331	9.02094170	-0.26903430		28.00000000	1.22642857	11.06354064	0.618219
29	-0.01998770	9.01859190	-0.18026092		29.00000000	1.18413793	10.67925675	0.639577
30	-0.00985587	9.04230980	-0.08911986		30.00000000	1.14466667	10.35043062	0.660967
31	-0.00065141	9.01734830	-0.00587403		31.00000000	1.10774194	9.98889486	0.682542
32	0.00950328	9.02284530	0.08574661		32.00000000	1.07312500	9.68264086	0.703917
33	0.01930586	9.02505870	0.17423647		33.00000000	1.04060606	9.39153078	0.725272
34	0.02946195	9.02633380	0.26593343		34.00000000	1.01000000	9.11659714	0.746650
35	0.03927495	9.02566240	0.35448244		35.00000000	0.98114286	8.85546419	0.768130
36	0.04936109	9.01971150	0.44522280		36.00000000	0.95388889	8.60380258	0.789508
37	0.05925447	9.02277850	0.53463993		37.00000000	0.92810811	8.37411388	0.810858
38	0.06938005	9.02683260	0.62628212		38.00000000	0.90368421	8.15740609	0.832235
39	0.07952870	9.01825810	0.71721038		39.00000000	0.88051282	7.94069188	0.853720
40	0.08935510	9.03163720	0.80702281		40.00000000	0.85850000	7.75366054	0.875103
41	0.09945984	9.02481650	0.89760682		41.00000000	0.83756098	7.55883411	0.896462
42	0.10928772	9.01315310	0.98502695		42.00000000	0.81761905	7.36932565	0.917836
43	0.11946094	9.03341290	1.07914000		43.00000000	0.79860465	7.21412556	0.939325
44	0.12930892	9.03058430	1.16773510		44.00000000	0.78045455	7.04796057	0.960696
45	0.13943972	9.01501660	1.25705139		45.00000000	0.76311111	6.87945933	0.982055
46	0.14926164	9.02215290	1.34666134		46.00000000	0.74652174	6.73523327	1.003424
47	0.15942369	9.02264690	1.43842366		47.00000000	0.73063830	6.59229137	1.024894
48	0.16959766	9.02098180	1.52993740		48.00000000	0.71541667	6.45376073	1.046272
49	0.17940322	9.02406020	1.61894546		49.00000000	0.70081633	6.32420872	1.067606
50	0.18954591	9.01912210	1.70953771		50.00000000	0.68680000	6.19433306	1.088984
51	0.19931947	9.02698420	1.79925371		51.00000000	0.67333333	6.07816936	1.110457
52	0.20943388	9.01705460	1.88847673		52.00000000	0.66038462	5.95472413	1.131830
53	0.21926847	9.02904700	1.97978532		53.00000000	0.64792453	5.85014102	1.153241
54	0.22938661	9.02294250	2.06974219		54.00000000	0.63592593	5.73792306	1.174596
55	0.23922268	9.01721670	2.15712275		55.00000000	0.62436364	5.63002221	1.196059
56	0.24941599	9.02945610	2.25209073		56.00000000	0.61321429	5.53699147	1.217432
57	0.25953189	9.01763060	2.34036271		57.00000000	0.60245614	5.43272693	1.238820
58	0.26935309	9.03906730	2.43470071		58.00000000	0.59206897	5.35175123	1.260185
59	0.27950248	9.01160910	2.51876709		59.00000000	0.58203390	5.24506197	1.281659
60	0.28931621	9.01815410	2.60909817		60.00000000	0.57233333	5.16139020	1.303029
61	0.29946041	9.02752490	2.70338631		61.00000000	0.56295082	5.08205254	1.324420
62	0.30932999	9.02283380	2.79103309		62.00000000	0.55387097	4.99748569	1.345907
63	0.31942058	9.02026080	2.88125694		63.00000000	0.54507937	4.91675803	1.367292
64	0.32924622	9.02719780	2.97217075		64.00000000	0.53656250	4.84365582	1.388657
65	0.33938819	9.01820090	3.06067088		65.00000000	0.52830769	4.76438491	1.410036
66	0.34922424	9.00947090	3.14632563		66.00000000	0.52030303	4.68765501	1.431505
67	0.35934985	9.02308560	3.24244446		67.00000000	0.51253731	4.62466805	1.452899
68	0.36953348	9.02380660	3.33459866		68.00000000	0.50500000	4.55702233	1.474262
69	0.37935466	9.02197460	3.42252811		69.00000000	0.49768116	4.49006678	1.495644
70	0.38949364	9.02098660	3.51361691		70.00000000	0.49057143	4.42543828	1.517124
71	0.39932969	9.01771070	3.60103962		71.00000000	0.48366197	4.36152374	1.538490
72	0.40945604	9.02314280	3.69458032		72.00000000	0.47694444	4.30353783	1.559849
73	0.41926011	9.00555130	3.77566843		73.00000000	0.47041096	4.23631002	1.581227
74	0.42944449	9.02791210	3.87698711		74.00000000	0.46405405	4.18943921	1.602700
75	0.43923962	9.00436970	3.95507593		75.00000000	0.45786667	4.12280074	1.624078
76	0.44938156	9.02749160	4.05678826		76.00000000	0.45184211	4.07900081	1.645419
77	0.45953989	9.00325300	4.13735389		77.00000000	0.44597403	4.01521699	1.666792
78	0.46942508	8.99793910	4.22385828		78.00000000	0.44025641	3.96140037	1.688268
79	0.47957450	8.99907110	4.31572502		79.00000000	0.43468354	3.91174812	1.709639
80	0.48936516	8.97321510	4.39117884		80.00000000	0.42925000	3.85175258	1.730979
81	0.49952871	8.97462370	4.48308220		81.00000000	0.42395062	3.80479726	1.752349
82	0.50934243	8.95056820	4.55890416		82.00000000	0.41878049	3.74832332	1.773831
83	0.51946950	8.92587570	4.63672019		83.00000000	0.41373494	3.69294665	1.795199
84	0.52925348	8.88493820	4.70238446		84.00000000	0.40880952	3.63224735	1.816562
85	0.53938204	8.83362580	4.76469910		85.00000000	0.40400000	3.56878482	1.837936
86	0.54953742	8.75741480	4.81252714		86.00000000	0.39930233	3.49685610	1.859408
87	0.55933625	8.64600090	4.83602172		87.00000000	0.39471264	3.41268587	1.880777
88	0.56949311	8.48710250	4.83334640		88.00000000	0.39022727	3.31189886	1.902155
89	0.57929045	8.30745790	4.81243103		89.00000000	0.38584270	3.20537196	1.923510
90	0.58941013	7.98749780	4.70791212		90.00000000	0.38155556	3.04767416	1.944977
91	0.59922904	7.62969830	4.57193679		91.00000000	0.37736264	2.87916307	1.966344
92	0.60932636	7.10382560	4.32854819		92.00000000	0.37326087	2.65158012	1.987836
93	0.61915499	6.45266390	3.99519905		93.00000000	0.36924731	2.38262880	2.009350
94	0.62923443	5.61395450	3.53249346		94.00000000	0.36531915	2.05088508	2.030727
95	0.63938087	4.49298290	2.87272732		95.00000000	0.36147368	1.62409508	2.052085
96	0.64914846	3.20028610	2.07746079		96.00000000	0.35770833	1.14476901	2.073514
97	0.65921372	1.54167630	1.01629417		97.00000000	0.35402062	0.54578520	2.095008
98	0.66898358	-0.38275403	-0.25605616		98.00000000	0.35040816	-0.13412014	2.116402
99	0.67906600	-2.71247290	-1.84194812		99.00000000	0.34686869	-0.94087191	2.137748
100	0.68878967	-5.37613580	-3.70302680		100.00000000	0.34340000	-1.84616503	2.159125
101	0.69906116	-8.56972980	-5.99076525		101.00000000	0.34000000	-2.91370813	2.180600
