# Supplementary material for: Study on the Electrical Injection Regeneration of Industrialized B-Doped Czochralski Silicon PERC Solar Cells
Source: Hindawi journal article supplement (doi:10.1155/2019/5357370), 2019-06-20
Supplement: f1 [file 5357370.f1.zip › section3.2/IVRawData_1-20-10min.csv]

12:45 02/04/2018
Test Lot:	JK-PERC
Recipe:	Recipe_YJX-LID
Cell Name:	1-20-10min
Test Order:	2
Test Condition:	Light
1	-0.29989398	9.00196930	-2.69963640		1.00000000	34.34000000	309.12762576	0.000000
2	-0.29003724	9.00182720	-2.61086512		2.00000000	17.17000000	154.56137302	0.061787
3	-0.27993491	8.99431420	-2.51782254		3.00000000	11.44666667	102.95491654	0.083208
4	-0.27008262	8.99860670	-2.43036727		4.00000000	8.58500000	77.25303852	0.104705
5	-0.25991553	9.00780490	-2.34126838		5.00000000	6.86800000	61.86560405	0.126141
6	-0.24978490	8.99898820	-2.24781137		6.00000000	5.72333333	51.50420913	0.147511
7	-0.23997135	8.99543380	-2.15864639		7.00000000	4.90571429	44.12902810	0.168893
8	-0.22981541	9.00585560	-2.06968440		8.00000000	4.29250000	38.65763516	0.190386
9	-0.21998250	9.01185700	-1.98245083		9.00000000	3.81555556	34.38524104	0.211778
10	-0.20980796	9.00141330	-1.88856816		10.00000000	3.43400000	30.91085327	0.233166
11	-0.20003086	8.99894330	-1.80006637		11.00000000	3.12181818	28.09306481	0.254517
12	-0.18986601	9.00290200	-1.70934508		12.00000000	2.86166667	25.76330456	0.275996
13	-0.18006957	8.99922180	-1.62048600		13.00000000	2.64153846	23.77179051	0.297372
14	-0.16991660	9.00430870	-1.52998152		14.00000000	2.45285714	22.08628291	0.318759
15	-0.16009486	9.00731090	-1.44202418		15.00000000	2.28933333	20.62073709	0.340117
16	-0.14996199	8.99549580	-1.34898245		16.00000000	2.14625000	19.30658286	0.361595
17	-0.13981424	8.99614620	-1.25778934		17.00000000	2.02000000	18.17221532	0.382983
18	-0.12997016	8.99664690	-1.16929564		18.00000000	1.90777778	17.16360303	0.404356
19	-0.11984772	9.00356100	-1.07905626		19.00000000	1.80736842	16.27275183	0.425852
20	-0.10998951	8.99217990	-0.98904546		20.00000000	1.71700000	15.43957289	0.447247
21	-0.09987228	8.99550250	-0.89840131		21.00000000	1.63523810	14.70978837	0.468601
22	-0.09004755	9.00478460	-0.81085882		22.00000000	1.56090909	14.05565014	0.489977
23	-0.07990352	9.00919060	-0.71986605		23.00000000	1.49304348	13.45111327	0.511462
24	-0.07008401	8.98358150	-0.62960544		24.00000000	1.43083333	12.85400786	0.532828
25	-0.05993105	9.00060370	-0.53941564		25.00000000	1.37360000	12.36322924	0.554165
26	-0.04981233	9.00081730	-0.44835166		26.00000000	1.32076923	11.88800254	0.575546
27	-0.03996900	9.00560860	-0.35994514		27.00000000	1.27185185	11.45379997	0.597029
28	-0.02983167	8.99356270	-0.26829299		28.00000000	1.22642857	11.02996225	0.618403
29	-0.01999950	9.00443270	-0.18008419		29.00000000	1.18413793	10.66249031	0.639761
30	-0.00986069	8.99185560	-0.08866586		30.00000000	1.14466667	10.29267738	0.661139
31	-0.00063735	9.00345130	-0.00573839		31.00000000	1.10774194	9.97350057	0.682734
32	0.00949977	9.00466730	0.08554223		32.00000000	1.07312500	9.66313360	0.704113
33	0.01933686	8.99118140	0.17386123		33.00000000	1.04060606	9.35627786	0.725460
34	0.02947241	9.00538830	0.26541053		34.00000000	1.01000000	9.09544218	0.746840
35	0.03927900	9.00607110	0.35374942		35.00000000	0.98114286	8.83624233	0.768318
36	0.04945176	8.99937530	0.44503496		36.00000000	0.95388889	8.58440411	0.789704
37	0.05926579	9.00210950	0.53351709		37.00000000	0.92810811	8.35493082	0.811059
38	0.06941026	9.00110150	0.62476883		38.00000000	0.90368421	8.13415330	0.832442
39	0.07953912	9.01160140	0.71677485		39.00000000	0.88051282	7.93483057	0.853917
40	0.08934421	8.99740310	0.80386588		40.00000000	0.85850000	7.72427056	0.875312
41	0.09952070	8.99656200	0.89534413		41.00000000	0.83756098	7.53516925	0.896684
42	0.10932951	8.99269010	0.98316640		42.00000000	0.81761905	7.35259472	0.918036
43	0.11951567	8.99134830	1.07460702		43.00000000	0.79860465	7.18053257	0.939514
44	0.12934160	9.01772500	1.16636698		44.00000000	0.78045455	7.03792447	0.960901
45	0.13950023	8.99131490	1.25429050		45.00000000	0.76311111	6.86137230	0.982284
46	0.14929415	8.99206920	1.34246333		46.00000000	0.74652174	6.71277514	1.003633
47	0.15947363	8.99733160	1.43483713		47.00000000	0.73063830	6.57379505	1.025107
48	0.16960843	9.01381780	1.52881949		48.00000000	0.71541667	6.44863548	1.046496
49	0.17943585	8.98958300	1.61305347		49.00000000	0.70081633	6.30004654	1.067885
50	0.18958108	9.00969790	1.70806826		50.00000000	0.68680000	6.18786052	1.089380
51	0.19934374	8.99973580	1.79404099		51.00000000	0.67333333	6.05982211	1.110768
52	0.20949046	8.99874310	1.88515083		52.00000000	0.66038462	5.94263150	1.132118
53	0.21932830	8.99209790	1.97222155		53.00000000	0.64792453	5.82620079	1.153490
54	0.22947055	8.99760530	2.06468544		54.00000000	0.63592593	5.72181048	1.174974
55	0.23927787	9.00718590	2.15522026		55.00000000	0.62436364	5.62375934	1.196354
56	0.24943799	8.99910350	2.24471829		56.00000000	0.61321429	5.51837882	1.217702
57	0.25957206	8.99712280	2.33540170		57.00000000	0.60245614	5.42037188	1.239076
58	0.26940319	8.99985600	2.42458992		58.00000000	0.59206897	5.32853543	1.260567
59	0.27954099	9.00586610	2.51750873		59.00000000	0.58203390	5.24171935	1.282007
60	0.28935799	8.98781200	2.60069521		60.00000000	0.57233333	5.14402440	1.303360
61	0.29951289	9.01456740	2.69997913		61.00000000	0.56295082	5.07475811	1.324738
62	0.30933210	8.98674390	2.77988836		62.00000000	0.55387097	4.97749654	1.346215
63	0.31946468	9.00505160	2.87679593		63.00000000	0.54507937	4.90846781	1.367597
64	0.32929659	8.99875450	2.96325917		64.00000000	0.53656250	4.82839421	1.388943
65	0.33942840	8.99544910	3.05331090		65.00000000	0.52830769	4.75236496	1.410325
66	0.34927294	8.99516490	3.14176769		66.00000000	0.52030303	4.68021156	1.431815
67	0.35940477	9.00200560	3.23536375		67.00000000	0.51253731	4.61386377	1.453204
68	0.36956936	9.00399680	3.32760133		68.00000000	0.50500000	4.54701838	1.474564
69	0.37941539	8.99847600	3.41416028		69.00000000	0.49768116	4.47837197	1.495939
70	0.38953084	8.98777870	3.50101699		70.00000000	0.49057143	4.40914744	1.517416
71	0.39935824	8.99604800	3.59264590		71.00000000	0.48366197	4.35104631	1.538801
72	0.40951166	8.98719980	3.68036311		72.00000000	0.47694444	4.28639502	1.560154
73	0.41931230	9.00102140	3.77423899		73.00000000	0.47041096	4.23417911	1.581528
74	0.42946944	8.99407390	3.86267988		74.00000000	0.46405405	4.17373646	1.603011
75	0.43929017	8.99294570	3.95051265		75.00000000	0.45786667	4.11757007	1.624394
76	0.44946665	8.98464970	4.03830040		76.00000000	0.45184211	4.05964304	1.645790
77	0.45959476	8.99249840	4.13290514		77.00000000	0.44597403	4.01042072	1.667154
78	0.46945268	8.97913930	4.21528101		78.00000000	0.44025641	3.95312364	1.688669
79	0.47958153	8.97868160	4.30600986		79.00000000	0.43468354	3.90288514	1.710050
80	0.48942906	8.96491530	4.38769007		80.00000000	0.42925000	3.84818989	1.731427
81	0.49955121	8.95113560	4.47155062		81.00000000	0.42395062	3.79483946	1.752915
82	0.50938088	8.91733070	4.54231776		82.00000000	0.41878049	3.73440410	1.774298
83	0.51951492	8.90275670	4.62511493		83.00000000	0.41373494	3.68338151	1.795647
84	0.52925301	8.85535430	4.68672292		84.00000000	0.40880952	3.62015317	1.817026
85	0.53941089	8.78738690	4.74001219		85.00000000	0.40400000	3.55010431	1.838509
86	0.54954422	8.69930080	4.78065047		86.00000000	0.39930233	3.47365104	1.859918
87	0.55939025	8.58394910	4.80177743		87.00000000	0.39471264	3.38819324	1.881264
88	0.56948340	8.40265560	4.78517288		88.00000000	0.39022727	3.27894538	1.902636
89	0.57931602	8.18083000	4.73928588		89.00000000	0.38584270	3.15651351	1.924115
90	0.58945602	7.84595970	4.62484818		90.00000000	0.38155556	2.99366951	1.945511
91	0.59926337	7.42808390	4.45137859		91.00000000	0.37736264	2.80308133	1.966873
92	0.60937583	6.85187150	4.17536488		92.00000000	0.37326087	2.55753551	1.988355
93	0.61915118	6.14291860	3.80339530		93.00000000	0.36924731	2.26825618	2.009861
94	0.62929189	5.22006180	3.28494256		94.00000000	0.36531915	1.90698853	2.031233
95	0.63939101	4.07276390	2.60408862		95.00000000	0.36147368	1.47219697	2.052577
96	0.64918864	2.71153350	1.76029675		96.00000000	0.35770833	0.96993813	2.073968
97	0.65924680	1.01285400	0.66772076		97.00000000	0.35402062	0.35857120	2.095450
98	0.66896856	-0.92581218	-0.61933924		98.00000000	0.35040816	-0.32441215	2.116959
99	0.67905569	-3.29104070	-2.23479991		99.00000000	0.34686869	-1.14155897	2.138350
100	0.68881541	-5.99328950	-4.12827016		100.00000000	0.34340000	-2.05809561	2.159736
101	0.69911170	-9.24467950	-6.46306360		101.00000000	0.34000000	-3.14319103	2.181220
12:45 02/04/2018
Test Lot:	JK-PERC
Recipe:	Recipe_YJX-LID
Cell Name:	1-20-10min
Test Order:	3
Test Condition:	Light
1	-0.29982892	8.99598220	-2.69725563		1.00000000	34.34000000	308.92202875	0.000000
2	-0.29003471	9.00945850	-2.61305568		2.00000000	17.17000000	154.69240245	0.061842
3	-0.27992117	8.97865100	-2.51331449		3.00000000	11.44666667	102.77562511	0.083313
4	-0.27008379	9.01743030	-2.43546175		4.00000000	8.58500000	77.41463913	0.104827
5	-0.25993678	8.99715230	-2.33869080		5.00000000	6.86800000	61.79244200	0.126219
6	-0.24975179	8.99096390	-2.24550933		6.00000000	5.72333333	51.45828339	0.147569
7	-0.23994194	9.00814630	-2.16143210		7.00000000	4.90571429	44.19139199	0.168939
8	-0.22982171	8.99489400	-2.06722192		8.00000000	4.29250000	38.61058250	0.190422
9	-0.21997167	9.00168800	-1.98011634		9.00000000	3.81555556	34.34644066	0.211793
10	-0.20981051	8.99798490	-1.88787180		10.00000000	3.43400000	30.89908015	0.233171
11	-0.19998056	8.99156950	-1.79813910		11.00000000	3.12181818	28.07004515	0.254526
12	-0.18985140	8.99284840	-1.70730486		12.00000000	2.86166667	25.73453450	0.276035
13	-0.18006983	8.99213410	-1.61921206		13.00000000	2.64153846	23.75306808	0.297420
14	-0.16990942	8.99971390	-1.52913617		14.00000000	2.45285714	22.07501252	0.318808
15	-0.16008765	9.00398920	-1.44142747		15.00000000	2.28933333	20.61313261	0.340242
16	-0.14992723	8.99674510	-1.34885707		16.00000000	2.14625000	19.30926417	0.361710
17	-0.13979509	9.00224690	-1.25846992		17.00000000	2.02000000	18.18453874	0.383085
18	-0.12997930	8.98523810	-1.16789496		18.00000000	1.90777778	17.14183758	0.404493
19	-0.11983674	9.01071640	-1.07981488		19.00000000	1.80736842	16.28568427	0.425849
20	-0.10999563	8.99500470	-0.98941121		20.00000000	1.71700000	15.44442307	0.447340
21	-0.09983075	9.00293640	-0.89876987		21.00000000	1.63523810	14.72194457	0.468721
22	-0.09005215	8.99636460	-0.81014197		22.00000000	1.56090909	14.04250729	0.490092
23	-0.07988281	8.99252130	-0.71834785		23.00000000	1.49304348	13.42622528	0.511450
24	-0.07006700	9.00522800	-0.63096927		24.00000000	1.43083333	12.88498040	0.532926
25	-0.05992742	8.99606230	-0.53911083		25.00000000	1.37360000	12.35699118	0.554310
26	-0.04978933	8.99382110	-0.44779634		26.00000000	1.32076923	11.87876218	0.575689
27	-0.03996385	8.98762990	-0.35918032		27.00000000	1.27185185	11.43093373	0.597030
28	-0.02982725	9.00476070	-0.26858727		28.00000000	1.22642857	11.04369580	0.618496
29	-0.02000772	8.99554160	-0.17998031		29.00000000	1.18413793	10.65196202	0.639863
30	-0.00985252	9.00227070	-0.08869502		30.00000000	1.14466667	10.30459919	0.661242
31	-0.00062173	8.99814990	-0.00559440		31.00000000	1.10774194	9.96762799	0.682843
32	0.00951690	8.98870940	0.08554461		32.00000000	1.07312500	9.64600877	0.704215
33	0.01933540	8.99548820	0.17393136		33.00000000	1.04060606	9.36075954	0.725565
34	0.02947097	8.99675460	0.26514304		34.00000000	1.01000000	9.08672215	0.746931
35	0.03931031	8.99643610	0.35365269		35.00000000	0.98114286	8.82678902	0.768416
36	0.04946076	8.99464700	0.44488209		36.00000000	0.95388889	8.57989383	0.789807
37	0.05925843	8.99236770	0.53287356		37.00000000	0.92810811	8.34588937	0.811151
38	0.06940293	8.99113080	0.62401079		38.00000000	0.90368421	8.12514294	0.832529
39	0.07954817	8.99688340	0.71568557		39.00000000	0.88051282	7.92187118	0.854016
40	0.08935476	9.00308800	0.80446878		40.00000000	0.85850000	7.72915105	0.875392
41	0.09952010	8.99976060	0.89565703		41.00000000	0.83756098	7.53784827	0.896732
42	0.10937209	8.99864770	0.98420091		42.00000000	0.81761905	7.35746576	0.918120
43	0.11951882	8.99322030	1.07485908		43.00000000	0.79860465	7.18202756	0.939598
44	0.12935296	9.00582030	1.16492951		44.00000000	0.78045455	7.02863339	0.960968
45	0.13950489	8.99692540	1.25511509		45.00000000	0.76311111	6.86565374	0.982320
46	0.14931373	8.99384590	1.34290468		46.00000000	0.74652174	6.71410148	1.003690
47	0.15945078	9.00523470	1.43589170		47.00000000	0.73063830	6.57956935	1.025157
48	0.16960421	8.99333380	1.52530727		48.00000000	0.71541667	6.43398089	1.046532
49	0.17941825	8.99997620	1.61475998		49.00000000	0.70081633	6.30733026	1.067875
50	0.18956721	8.99878410	1.70587440		50.00000000	0.68680000	6.18036492	1.089252
51	0.19934255	8.99391650	1.79287025		51.00000000	0.67333333	6.05590378	1.110727
52	0.20951757	8.99668980	1.88496458		52.00000000	0.66038462	5.94127553	1.132110
53	0.21931894	8.99763970	1.97335280		53.00000000	0.64792453	5.82979146	1.153482
54	0.22946642	8.98678870	2.06216623		54.00000000	0.63592593	5.71493193	1.174846
55	0.23929609	9.01023770	2.15611465		55.00000000	0.62436364	5.62566477	1.196334
56	0.24942569	8.98568340	2.24126028		56.00000000	0.61321429	5.51014943	1.217728
57	0.25959775	9.00146290	2.33675952		57.00000000	0.60245614	5.42298660	1.239107
58	0.26938200	8.99322890	2.42261399		58.00000000	0.59206897	5.32461173	1.260446
59	0.27953470	8.99449350	2.51427304		59.00000000	0.58203390	5.23510012	1.281916
60	0.28938743	8.99151330	2.60203093		60.00000000	0.57233333	5.14614278	1.303299
61	0.29951555	8.99829010	2.69512781		61.00000000	0.56295082	5.06559479	1.324683
62	0.30932960	8.98596760	2.77962576		62.00000000	0.55387097	4.97706657	1.346169
63	0.31947780	9.00074860	2.87553936		63.00000000	0.54507937	4.90612233	1.367547
64	0.32931715	8.98894500	2.96021375		64.00000000	0.53656250	4.82313080	1.388911
65	0.33943337	8.99731250	3.05398810		65.00000000	0.52830769	4.75334940	1.410295
66	0.34927198	8.99244120	3.14080774		66.00000000	0.52030303	4.67879441	1.431766
67	0.35939786	8.99558540	3.23299414		67.00000000	0.51253731	4.61057317	1.453157
68	0.36958253	8.99235060	3.32341569		68.00000000	0.50500000	4.54113705	1.474507
69	0.37938839	8.99140640	3.41123520		69.00000000	0.49768116	4.47485356	1.495878
70	0.38953885	8.98877430	3.50147680		70.00000000	0.49057143	4.40963585	1.517364
71	0.39934918	8.99437050	3.59189448		71.00000000	0.48366197	4.35023497	1.538741
72	0.40951377	8.99242400	3.68252145		72.00000000	0.47694444	4.28888667	1.560088
73	0.41933450	8.98374270	3.76719325		73.00000000	0.47041096	4.22605102	1.581477
74	0.42948198	9.00311660	3.86667634		74.00000000	0.46405405	4.17793276	1.602952
75	0.43928930	8.98101430	3.94526349		75.00000000	0.45786667	4.11210708	1.624344
76	0.44946879	8.99315550	4.04214272		76.00000000	0.45184211	4.06348631	1.645688
77	0.45960808	8.97192570	4.12356954		77.00000000	0.44597403	4.00124583	1.667060
78	0.46946305	8.97973920	4.21565575		78.00000000	0.44025641	3.95338775	1.688548
79	0.47962391	8.96900840	4.30175088		79.00000000	0.43468354	3.89868036	1.709921
80	0.48941639	8.96064570	4.38548687		80.00000000	0.42925000	3.84635717	1.731278
81	0.49955121	8.95138070	4.47167306		81.00000000	0.42395062	3.79494337	1.752656
82	0.50936973	8.92202190	4.54460789		82.00000000	0.41878049	3.73636868	1.774139
83	0.51952535	8.89539720	4.62138434		83.00000000	0.41373494	3.68033662	1.795528
84	0.52930444	8.85574150	4.68738330		84.00000000	0.40880952	3.62031147	1.816895
85	0.53943551	8.79291920	4.74321285		85.00000000	0.40400000	3.55233936	1.838262
86	0.54958898	8.70702170	4.78528317		86.00000000	0.39930233	3.47673401	1.859733
87	0.55939186	8.58187200	4.80062934		87.00000000	0.39471264	3.38737338	1.881120
88	0.56951624	8.41246510	4.79103549		88.00000000	0.39022727	3.28277331	1.902504
89	0.57933474	8.17896650	4.73835943		89.00000000	0.38584270	3.15579449	1.923841
90	0.58943683	7.85083530	4.62757147		90.00000000	0.38155556	2.99552982	1.945322
91	0.59924191	7.43943790	4.45802298		91.00000000	0.37736264	2.80736591	1.966695
92	0.60938489	6.87057070	4.18682197		92.00000000	0.37326087	2.56451519	1.988183
93	0.61914688	6.16013000	3.81402527		93.00000000	0.36924731	2.27461144	2.009680
94	0.62926751	5.24242260	3.29888622		94.00000000	0.36531915	1.91515736	2.031063
95	0.63940090	4.09249350	2.61674403		95.00000000	0.36147368	1.47932870	2.052425
96	0.64916581	2.72480540	1.76885050		96.00000000	0.35770833	0.97468560	2.073797
97	0.65923512	1.02741500	0.67730805		97.00000000	0.35402062	0.36372609	2.095316
98	0.66903275	-0.92990226	-0.62213507		98.00000000	0.35040816	-0.32584534	2.116726
99	0.67904705	-3.30915930	-2.24707486		99.00000000	0.34686869	-1.14784374	2.138067
100	0.68882686	-6.01595830	-4.14395367		100.00000000	0.34340000	-2.06588008	2.159445
101	0.69912612	-9.30111220	-6.50265048		101.00000000	0.34000000	-3.16237815	2.180935
12:46 02/04/2018
Test Lot:	JK-PERC
Recipe:	Recipe_YJX-LID
Cell Name:	1-20-10min
Test Order:	4
Test Condition:	Light
1	-0.29984841	8.99376200	-2.69676524		1.00000000	34.34000000	308.84578708	0.000000
2	-0.29005700	8.99316600	-2.60853075		2.00000000	17.17000000	154.41266022	0.061818
3	-0.27991724	9.00218580	-2.51986700		3.00000000	11.44666667	103.04502012	0.083254
4	-0.27011243	8.99677370	-2.43014041		4.00000000	8.58500000	77.23730221	0.104701
5	-0.25992280	9.01266100	-2.34259608		5.00000000	6.86800000	61.89895575	0.126163
6	-0.24979420	8.98665620	-2.24481460		6.00000000	5.72333333	51.43362898	0.147552
7	-0.23998789	8.98975660	-2.15743272		7.00000000	4.90571429	44.10117738	0.168948
8	-0.22979678	9.00875280	-2.07018239		8.00000000	4.29250000	38.67007139	0.190431
9	-0.22001579	8.99279210	-1.97855626		9.00000000	3.81555556	34.31249786	0.211824
10	-0.20985742	8.99465660	-1.88759543		10.00000000	3.43400000	30.88765076	0.233182
11	-0.20005335	8.99992850	-1.80046585		11.00000000	3.12181818	28.09614043	0.254555
12	-0.18989424	8.98986340	-1.70712328		12.00000000	2.86166667	25.72599243	0.276055
13	-0.18012516	9.00068570	-1.62124995		13.00000000	2.64153846	23.77565746	0.297440
14	-0.16995935	9.01460740	-1.53211681		14.00000000	2.45285714	22.11154415	0.318797
15	-0.16013294	8.99662400	-1.44065585		15.00000000	2.28933333	20.59627121	0.340175
16	-0.14998202	8.99205590	-1.34864671		16.00000000	2.14625000	19.29919998	0.361665
17	-0.13984823	8.99990460	-1.25862073		17.00000000	2.02000000	18.17980729	0.383064
18	-0.13001512	8.99720290	-1.16977241		18.00000000	1.90777778	17.16466375	0.404419
19	-0.11988505	8.99844460	-1.07877898		19.00000000	1.80736842	16.26350461	0.425794
20	-0.11006609	9.00346760	-0.99097648		20.00000000	1.71700000	15.45895387	0.447268
21	-0.09988167	8.99685380	-0.89862079		21.00000000	1.63523810	14.71199807	0.468640
22	-0.09008281	9.00053020	-0.81079304		22.00000000	1.56090909	14.04900941	0.490003
23	-0.07993338	8.99493690	-0.71899574		23.00000000	1.49304348	13.42983188	0.511375
24	-0.07010996	9.00253960	-0.63116766		24.00000000	1.43083333	12.88113374	0.532873
25	-0.05995531	8.99645520	-0.53938530		25.00000000	1.37360000	12.35753086	0.554245
26	-0.04979695	9.00677680	-0.44851001		26.00000000	1.32076923	11.89587367	0.575609
27	-0.03996534	8.99339100	-0.35942396		27.00000000	1.27185185	11.43826100	0.596991
28	-0.02984047	9.00361440	-0.26867209		28.00000000	1.22642857	11.04228995	0.618468
29	-0.01999397	8.99224660	-0.17979074		29.00000000	1.18413793	10.64806028	0.639852
30	-0.00986985	9.00325780	-0.08886080		30.00000000	1.14466667	10.30572910	0.661240
31	-0.00065676	8.97986700	-0.00589763		31.00000000	1.10774194	9.94737525	0.682717
32	0.00949172	8.99835300	0.08540984		32.00000000	1.07312500	9.65635756	0.704253
33	0.01933347	9.00042720	0.17400948		33.00000000	1.04060606	9.36589909	0.725633
34	0.02947219	8.98797890	0.26489545		34.00000000	1.01000000	9.07785869	0.747036
35	0.03930204	9.00522520	0.35392368		35.00000000	0.98114286	8.83541238	0.768442
36	0.04943555	8.99874970	0.44485812		36.00000000	0.95388889	8.58380735	0.789910
37	0.05924157	8.99290370	0.53275374		37.00000000	0.92810811	8.34638684	0.811288
38	0.06938922	8.99299720	0.62401710		38.00000000	0.90368421	8.12682957	0.832667
39	0.07953762	8.99423600	0.71538015		39.00000000	0.88051282	7.91954011	0.854138
40	0.08936449	8.99287030	0.80364328		40.00000000	0.85850000	7.72037915	0.875534
41	0.09948237	9.00131990	0.89547265		41.00000000	0.83756098	7.53915428	0.896888
42	0.10933603	9.00758840	0.98485396		42.00000000	0.81761905	7.36477585	0.918258
43	0.11946955	8.98730850	1.07370970		43.00000000	0.79860465	7.17730637	0.939751
44	0.12929417	8.99570940	1.16309278		44.00000000	0.78045455	7.02074229	0.961123
45	0.13942620	8.99876500	1.25466361		45.00000000	0.76311111	6.86705756	0.982494
46	0.14925678	8.99650380	1.34278919		46.00000000	0.74652174	6.71608566	1.003869
47	0.15939625	9.00479790	1.43533102		47.00000000	0.73063830	6.57925021	1.025339
48	0.16955507	8.99129390	1.52451947		48.00000000	0.71541667	6.43252151	1.046734
49	0.17937970	9.00200080	1.61477620		49.00000000	0.70081633	6.30874913	1.068078
50	0.18950577	8.98442650	1.70260066		50.00000000	0.68680000	6.17050412	1.089462
51	0.19930585	8.99867820	1.79348921		51.00000000	0.67333333	6.05910999	1.110955
52	0.20942819	8.98142910	1.88096444		52.00000000	0.66038462	5.93119760	1.132329
53	0.21926026	9.01031680	1.97560440		53.00000000	0.64792453	5.83800526	1.153680
54	0.22938558	8.99333950	2.06294240		54.00000000	0.63592593	5.71909775	1.175062
55	0.23922957	8.99606610	2.15212502		55.00000000	0.62436364	5.61681654	1.196540
56	0.24938467	9.00244620	2.24507207		56.00000000	0.61321429	5.52042862	1.217923
57	0.25951001	8.98422620	2.33149663		57.00000000	0.60245614	5.41260224	1.239296
58	0.26933241	8.99588490	2.42288336		58.00000000	0.59206897	5.32618427	1.260671
59	0.27950090	8.98956110	2.51259042		59.00000000	0.58203390	5.23222929	1.282157
60	0.28935751	8.99911210	2.60396067		60.00000000	0.57233333	5.15049183	1.303531
61	0.29947913	8.99495510	2.69380133		61.00000000	0.56295082	5.06371735	1.324921
62	0.30932236	9.00220300	2.78458268		62.00000000	0.55387097	4.98605889	1.346279
63	0.31943059	8.99531360	2.87337833		63.00000000	0.54507937	4.90315983	1.367754
64	0.32927680	8.99000170	2.96019899		64.00000000	0.53656250	4.82369779	1.389129
65	0.33942148	9.00089740	3.05509792		65.00000000	0.52830769	4.75524333	1.410517
66	0.34923941	8.99973490	3.14306211		66.00000000	0.52030303	4.68258934	1.431865
67	0.35938931	8.98928260	3.23065207		67.00000000	0.51253731	4.60734275	1.453340
68	0.36954364	8.99269390	3.32319284		68.00000000	0.50500000	4.54131042	1.474728
69	0.37939879	8.99924370	3.41430217		69.00000000	0.49768116	4.47875404	1.496114
70	0.38952115	8.99145030	3.50236006		70.00000000	0.49057143	4.41094862	1.517602
71	0.39934281	8.97992040	3.58606665		71.00000000	0.48366197	4.34324601	1.538995
72	0.40948600	9.01404000	3.69112318		72.00000000	0.47694444	4.29919630	1.560350
73	0.41930765	8.97472860	3.76317236		73.00000000	0.47041096	4.22181069	1.581730
74	0.42946571	8.99020860	3.86098632		74.00000000	0.46405405	4.17194275	1.603215
75	0.43926132	8.98324680	3.94599285		75.00000000	0.45786667	4.11312927	1.624604
76	0.44944915	8.97555450	4.03405534		76.00000000	0.45184211	4.05553344	1.645964
77	0.45955810	9.00824550	4.13981219		77.00000000	0.44597403	4.01744351	1.667339
78	0.46941474	8.96089940	4.20637826		78.00000000	0.44025641	3.94509340	1.688828
79	0.47956240	8.97417160	4.30367527		79.00000000	0.43468354	3.90092472	1.710220
80	0.48934832	8.95228770	4.38078695		80.00000000	0.42925000	3.84276950	1.731580
81	0.49951163	8.95641520	4.47383356		81.00000000	0.42395062	3.79707775	1.752956
82	0.50933027	8.91902830	4.54273109		82.00000000	0.41878049	3.73511502	1.774449
83	0.51948392	8.90074250	4.62379260		83.00000000	0.41373494	3.68254816	1.795838
84	0.52926314	8.84609990	4.68191461		84.00000000	0.40880952	3.61636989	1.817184
85	0.53939742	8.79502680	4.74401476		85.00000000	0.40400000	3.55319083	1.838574
86	0.54951155	8.68912790	4.77477614		86.00000000	0.39930233	3.46958898	1.860059
87	0.55936223	8.59647750	4.80854482		87.00000000	0.39471264	3.39313836	1.881449
88	0.56947196	8.40602680	4.78699656		88.00000000	0.39022727	3.28026091	1.902801
89	0.57929063	8.15896220	4.72641035		89.00000000	0.38584270	3.14807598	1.924171
90	0.58940327	7.86154220	4.63361868		90.00000000	0.38155556	2.99961510	1.945650
91	0.59919441	7.43436380	4.45462923		91.00000000	0.37736264	2.80545113	1.967026
92	0.60932422	6.86813020	4.18491808		92.00000000	0.37326087	2.56360425	1.988498
93	0.61913621	6.15023040	3.80783034		93.00000000	0.36924731	2.27095604	2.009901
94	0.62926227	5.24031350	3.29753157		94.00000000	0.36531915	1.91438687	2.031430
95	0.63936228	4.08368110	2.61095166		95.00000000	0.36147368	1.47614325	2.052826
96	0.64912587	2.73508000	1.77541118		96.00000000	0.35770833	0.97836091	2.074223
97	0.65926385	1.03606810	0.68304224		97.00000000	0.35402062	0.36678947	2.095594
98	0.66898650	-0.92038119	-0.61572259		98.00000000	0.35040816	-0.32250908	2.117087
99	0.67903668	-3.27719160	-2.22533330		99.00000000	0.34686869	-1.13675515	2.138474
100	0.68878913	-5.97671790	-4.11669832		100.00000000	0.34340000	-2.05240493	2.159858
101	0.69912058	-9.23750110	-6.45812713		101.00000000	0.34000000	-3.14075037	2.181398
