# Supplementary material for: Study on the Electrical Injection Regeneration of Industrialized B-Doped Czochralski Silicon PERC Solar Cells
Source: Hindawi journal article supplement (doi:10.1155/2019/5357370), 2019-06-20
Supplement: f1 [file 5357370.f1.zip › section3.2/IVRawData_1-20-20min.csv]

13:05 02/04/2018
Test Lot:	JK-PERC
Recipe:	Recipe_YJX-LID
Cell Name:	1-20-20min
Test Order:	2
Test Condition:	Light
1	-0.29989326	9.00846860	-2.70157902		1.00000000	34.34000000	309.35081172	0.000000
2	-0.29005963	8.99971490	-2.61045397		2.00000000	17.17000000	154.52510483	0.061801
3	-0.27995658	9.00032420	-2.51969998		3.00000000	11.44666667	103.02371101	0.083227
4	-0.27012813	8.99068830	-2.42863782		4.00000000	8.58500000	77.18505906	0.104718
5	-0.25991863	8.99644950	-2.33834483		5.00000000	6.86800000	61.78761517	0.126153
6	-0.24975975	9.00693990	-2.24957106		6.00000000	5.72333333	51.54971936	0.147515
7	-0.23993953	8.99468710	-2.15818100		7.00000000	4.90571429	44.12536500	0.168902
8	-0.22981636	9.01025200	-2.07070332		8.00000000	4.29250000	38.67650671	0.190394
9	-0.21995221	8.98291970	-1.97581304		9.00000000	3.81555556	34.27482917	0.211763
10	-0.20983499	9.00606540	-1.88978764		10.00000000	3.43400000	30.92682858	0.233122
11	-0.19999467	8.98993210	-1.79793850		11.00000000	3.12181818	28.06493348	0.254496
12	-0.18988416	9.00514890	-1.70993513		12.00000000	2.86166667	25.76973444	0.275981
13	-0.18007880	8.99900050	-1.62052921		13.00000000	2.64153846	23.77120594	0.297366
14	-0.16992141	8.99922280	-1.52916063		14.00000000	2.45285714	22.07380793	0.318757
15	-0.16012946	8.99502560	-1.44036859		15.00000000	2.28933333	20.59261194	0.340114
16	-0.14994079	9.00236030	-1.34982102		16.00000000	2.14625000	19.32131579	0.361597
17	-0.13981837	8.99574180	-1.25776996		17.00000000	2.02000000	18.17139844	0.382981
18	-0.13000782	8.99321460	-1.16918822		18.00000000	1.90777778	17.15705496	0.404376
19	-0.11981767	9.01313300	-1.07993260		19.00000000	1.80736842	16.29005196	0.425776
20	-0.11001679	8.99604510	-0.98971600		20.00000000	1.71700000	15.44620944	0.447240
21	-0.09988841	9.00691600	-0.89968649		21.00000000	1.63523810	14.72845216	0.468619
22	-0.09007562	8.99619580	-0.81033791		22.00000000	1.56090909	14.04224381	0.489971
23	-0.07996064	8.99075980	-0.71890694		23.00000000	1.49304348	13.42359528	0.511323
24	-0.07009724	9.00044920	-0.63090663		24.00000000	1.43083333	12.87814273	0.532808
25	-0.05996068	8.99825950	-0.53954174		25.00000000	1.37360000	12.36000925	0.554176
26	-0.04981816	9.00601010	-0.44866287		26.00000000	1.32076923	11.89486103	0.575540
27	-0.04000760	9.00442790	-0.36024557		27.00000000	1.27185185	11.45229830	0.596911
28	-0.02983829	8.99523740	-0.26840254		28.00000000	1.22642857	11.03201615	0.618385
29	-0.02003146	9.00474830	-0.18037822		29.00000000	1.18413793	10.66286402	0.639780
30	-0.00989117	8.98216530	-0.08884416		30.00000000	1.14466667	10.28158521	0.661161
31	-0.00066861	8.98919770	-0.00601025		31.00000000	1.10774194	9.95771126	0.682629
32	0.00951315	8.99914070	0.08561014		32.00000000	1.07312500	9.65720286	0.704096
33	0.01933236	8.99646280	0.17392283		33.00000000	1.04060606	9.36177371	0.725471
34	0.02948277	8.99812600	0.26528969		34.00000000	1.01000000	9.08810726	0.746847
35	0.03931315	9.00152590	0.35387829		35.00000000	0.98114286	8.83178284	0.768323
36	0.04945239	8.99841980	0.44499340		36.00000000	0.95388889	8.58349266	0.789694
37	0.05927384	8.99126240	0.53294660		37.00000000	0.92810811	8.34486354	0.811043
38	0.06941457	8.99969200	0.62470976		38.00000000	0.90368421	8.13287956	0.832430
39	0.07959029	8.98966030	0.71548968		39.00000000	0.88051282	7.91551115	0.853914
40	0.08938866	8.99386600	0.80394964		40.00000000	0.85850000	7.72123396	0.875294
41	0.09952642	8.99314980	0.89505600		41.00000000	0.83756098	7.53231132	0.896655
42	0.10933968	8.98590850	0.98251636		42.00000000	0.81761905	7.34704995	0.918037
43	0.11950051	9.00525380	1.07613242		43.00000000	0.79860465	7.19163757	0.939519
44	0.12931824	8.99242400	1.16288445		44.00000000	0.78045455	7.01817819	0.960888
45	0.13947907	9.00061800	1.25539783		45.00000000	0.76311111	6.86847160	0.982227
46	0.14930572	8.98633290	1.34171090		46.00000000	0.74652174	6.70849286	1.003601
47	0.15946209	8.99902920	1.43500400		47.00000000	0.73063830	6.57503538	1.025080
48	0.16958272	8.99309440	1.52507341		48.00000000	0.71541667	6.43380962	1.046444
49	0.17943320	9.00196840	1.61525200		49.00000000	0.70081633	6.30872643	1.067806
50	0.18956277	8.99499420	1.70511602		50.00000000	0.68680000	6.17776202	1.089174
51	0.19933882	8.99894050	1.79383818		51.00000000	0.67333333	6.05928660	1.110638
52	0.20947285	8.99716660	1.88466213		52.00000000	0.66038462	5.94159040	1.132027
53	0.21931663	8.97951890	1.96935782		53.00000000	0.64792453	5.81805055	1.153366
54	0.22945960	9.00382040	2.06601303		54.00000000	0.63592593	5.72576282	1.174741
55	0.23925500	8.98253060	2.14911536		55.00000000	0.62436364	5.60836547	1.196229
56	0.24939349	8.98535630	2.24088937		56.00000000	0.61321429	5.50994885	1.217605
57	0.25956029	9.00620170	2.33765233		57.00000000	0.60245614	5.42584152	1.238977
58	0.26934823	8.98501400	2.42009762		58.00000000	0.59206897	5.31974794	1.260343
59	0.27952543	8.99743370	2.51501152		59.00000000	0.58203390	5.23681141	1.281822
60	0.28934538	8.98133560	2.59870796		60.00000000	0.57233333	5.14031774	1.303201
61	0.29947793	8.99997710	2.69529451		61.00000000	0.56295082	5.06654449	1.324580
62	0.30928153	8.98680110	2.77945159		62.00000000	0.55387097	4.97752822	1.345924
63	0.31945649	9.00022220	2.87517939		63.00000000	0.54507937	4.90583540	1.367398
64	0.32925412	8.99889370	2.96292283		64.00000000	0.53656250	4.82846890	1.388778
65	0.33944100	8.99437810	3.05306070		65.00000000	0.52830769	4.75179914	1.410161
66	0.34924459	8.99130060	3.14016309		66.00000000	0.52030303	4.67820095	1.431640
67	0.35939425	9.00357340	3.23583251		67.00000000	0.51253731	4.61466732	1.453016
68	0.36956477	8.99811940	3.32538793		68.00000000	0.50500000	4.54405030	1.474351
69	0.37939069	8.98723700	3.40967405		69.00000000	0.49768116	4.47277853	1.495729
70	0.38953066	8.99679660	3.50452812		70.00000000	0.49057143	4.41357136	1.517214
71	0.39937964	8.98877240	3.58993269		71.00000000	0.48366197	4.34752738	1.538581
72	0.40950775	8.99660110	3.68417787		72.00000000	0.47694444	4.29087891	1.559943
73	0.41933736	8.98126220	3.76617878		73.00000000	0.47041096	4.22488416	1.581314
74	0.42946917	9.00001530	3.86522910		74.00000000	0.46405405	4.17649359	1.602791
75	0.43927872	8.97468570	3.94238845		75.00000000	0.45786667	4.10920943	1.624167
76	0.44945443	8.97687340	4.03469552		76.00000000	0.45184211	4.05612938	1.645512
77	0.45958772	8.98760410	4.13059248		77.00000000	0.44597403	4.00823798	1.666885
78	0.46945679	8.97891140	4.21521092		78.00000000	0.44025641	3.95302330	1.688356
79	0.47959083	8.97272300	4.30323567		79.00000000	0.43468354	3.90029504	1.709720
80	0.48941451	8.96623420	4.38820512		80.00000000	0.42925000	3.84875603	1.731075
81	0.49952176	8.94472980	4.46808717		81.00000000	0.42395062	3.79212372	1.752448
82	0.50935733	8.92428970	4.54565237		82.00000000	0.41878049	3.73731839	1.773920
83	0.51952118	8.89859200	4.62300702		83.00000000	0.41373494	3.68165843	1.795301
84	0.52925628	8.85754680	4.68791227		84.00000000	0.40880952	3.62104949	1.816655
85	0.53941935	8.78880310	4.74085046		85.00000000	0.40400000	3.55067645	1.838070
86	0.54957199	8.71290020	4.78836590		86.00000000	0.39930233	3.47908131	1.859541
87	0.55937332	8.58653550	4.80307887		87.00000000	0.39471264	3.38921413	1.880922
88	0.56948727	8.42119980	4.79576608		88.00000000	0.39022727	3.28618183	1.902290
89	0.57929683	8.18487930	4.74147463		89.00000000	0.38584270	3.15807590	1.923646
90	0.58941001	7.85752530	4.63130407		90.00000000	0.38155556	2.99808243	1.945127
91	0.59920913	7.44454190	4.46083748		91.00000000	0.37736264	2.80929197	1.966518
92	0.60934091	6.85683200	4.17814825		92.00000000	0.37326087	2.55938707	1.988002
93	0.61915714	6.17790410	3.82509343		93.00000000	0.36924731	2.28117448	2.009357
94	0.62926513	5.24508620	3.30054985		94.00000000	0.36531915	1.91613043	2.030849
95	0.63936496	4.09367750	2.61735395		95.00000000	0.36147368	1.47975669	2.052234
96	0.64917445	2.73293540	1.77415184		96.00000000	0.35770833	0.97759377	2.073617
97	0.65926015	1.03865540	0.68474411		97.00000000	0.35402062	0.36770543	2.095114
98	0.66897887	-0.92487776	-0.61872368		98.00000000	0.35040816	-0.32408472	2.116496
99	0.67905933	-3.29539750	-2.23777042		99.00000000	0.34686869	-1.14307020	2.137904
100	0.68885916	-6.03028490	-4.15401699		100.00000000	0.34340000	-2.07079983	2.159308
101	0.69912350	-9.30666450	-6.50650786		101.00000000	0.34000000	-3.16426593	2.180797
13:05 02/04/2018
Test Lot:	JK-PERC
Recipe:	Recipe_YJX-LID
Cell Name:	1-20-20min
Test Order:	3
Test Condition:	Light
1	-0.29986799	8.99882700	-2.69846016		1.00000000	34.34000000	309.01971918	0.000000
2	-0.29008266	8.99280550	-2.60865694		2.00000000	17.17000000	154.40647044	0.061787
3	-0.27995497	8.99538420	-2.51830251		3.00000000	11.44666667	102.96716448	0.083207
4	-0.27013540	9.00193120	-2.43174029		4.00000000	8.58500000	77.28157935	0.104653
5	-0.25999132	9.01595120	-2.34406905		5.00000000	6.86800000	61.92155284	0.126134
6	-0.24980406	8.97819810	-2.24279034		6.00000000	5.72333333	51.38522046	0.147502
7	-0.23998301	9.00983140	-2.16220646		7.00000000	4.90571429	44.19965861	0.168923
8	-0.22985753	8.98365880	-2.06496162		8.00000000	4.29250000	38.56235540	0.190301
9	-0.22002979	9.00977610	-1.98241914		9.00000000	3.81555556	34.37730125	0.211806
10	-0.20990655	8.98310660	-1.88561291		10.00000000	3.43400000	30.84798806	0.233190
11	-0.20006168	9.01204780	-1.80296542		11.00000000	3.12181818	28.13397468	0.254546
12	-0.18992057	8.99847130	-1.70899480		12.00000000	2.86166667	25.75062537	0.275903
13	-0.18013003	8.99673270	-1.62058173		13.00000000	2.64153846	23.76521546	0.297381
14	-0.16995990	8.99193100	-1.52826769		14.00000000	2.45285714	22.05592218	0.318800
15	-0.16015077	9.01275540	-1.44339972		15.00000000	2.28933333	20.63320136	0.340193
16	-0.15002529	8.97818470	-1.34695476		16.00000000	2.14625000	19.26942891	0.361551
17	-0.13986856	9.01417540	-1.26079973		17.00000000	2.02000000	18.20863431	0.383037
18	-0.13001178	8.99569320	-1.16954609		18.00000000	1.90777778	17.16178358	0.404423
19	-0.11990789	8.98836990	-1.07777647		19.00000000	1.80736842	16.24529591	0.425817
20	-0.11005558	9.01045890	-0.99165128		20.00000000	1.71700000	15.47095793	0.447296
21	-0.09990852	8.98391440	-0.89756962		21.00000000	1.63523810	14.69083907	0.468690
22	-0.09009343	9.00027080	-0.81086523		22.00000000	1.56090909	14.04860451	0.490026
23	-0.07994488	8.98846150	-0.71858147		23.00000000	1.49304348	13.42016382	0.511403
24	-0.07011862	8.99938580	-0.63102452		24.00000000	1.43083333	12.87662118	0.532889
25	-0.05996933	8.99762730	-0.53958166		25.00000000	1.37360000	12.35914086	0.554263
26	-0.04980292	8.99715330	-0.44808452		26.00000000	1.32076923	11.88316324	0.575614
27	-0.03998038	9.00330640	-0.35995559		27.00000000	1.27185185	11.45087192	0.597002
28	-0.02984747	8.98786740	-0.26826506		28.00000000	1.22642857	11.02297738	0.618472
29	-0.02002716	8.98977380	-0.18003961		29.00000000	1.18413793	10.64513215	0.639841
30	-0.00989275	8.99909210	-0.08902580		30.00000000	1.14466667	10.30096076	0.661209
31	-0.00064853	8.99494550	-0.00583352		31.00000000	1.10774194	9.96407834	0.682699
32	0.00949311	8.99747660	0.08541399		32.00000000	1.07312500	9.65541708	0.704187
33	0.01933025	8.99468330	0.17386949		33.00000000	1.04060606	9.35992196	0.725579
34	0.02945320	8.99386410	0.26489811		34.00000000	1.01000000	9.08380274	0.746923
35	0.03926132	8.98401450	0.35272429		35.00000000	0.98114286	8.81460166	0.768302
36	0.04940139	8.99102020	0.44416890		36.00000000	0.95388889	8.57643427	0.789775
37	0.05922961	9.00110820	0.53313212		37.00000000	0.92810811	8.35400150	0.811155
38	0.06934809	8.98390390	0.62301657		38.00000000	0.90368421	8.11861210	0.832512
39	0.07950528	8.99411110	0.71507932		39.00000000	0.88051282	7.91943013	0.853890
40	0.08935285	8.99184130	0.80344661		40.00000000	0.85850000	7.71949576	0.875367
41	0.09948398	9.00166230	0.89552121		41.00000000	0.83756098	7.53944106	0.896752
42	0.10929210	8.97693630	0.98110822		42.00000000	0.81761905	7.33971411	0.918116
43	0.11946641	9.01081560	1.07648979		43.00000000	0.79860465	7.19607925	0.939481
44	0.12924923	8.99209790	1.16222173		44.00000000	0.78045455	7.01792368	0.960956
45	0.13943544	8.99029060	1.25356513		45.00000000	0.76311111	6.86059065	0.982340
46	0.14924876	8.98633860	1.34119989		46.00000000	0.74652174	6.70849712	1.003725
47	0.15935981	8.99720000	1.43379208		47.00000000	0.73063830	6.57369889	1.025084
48	0.16953635	8.98651890	1.52354161		48.00000000	0.71541667	6.42910540	1.046555
49	0.17937647	8.99164580	1.61288968		49.00000000	0.70081633	6.30149218	1.067984
50	0.18951207	8.99069980	1.70384613		50.00000000	0.68680000	6.17481262	1.089364
51	0.19931796	8.99781700	1.79342653		51.00000000	0.67333333	6.05853011	1.110833
52	0.20941709	8.99395560	1.88348801		52.00000000	0.66038462	5.93946991	1.132215
53	0.21927732	8.99837970	1.97314058		53.00000000	0.64792453	5.83027092	1.153570
54	0.22939506	8.98898220	2.06202811		54.00000000	0.63592593	5.71632683	1.174943
55	0.23924263	8.98946950	2.15066433		55.00000000	0.62436364	5.61269787	1.196429
56	0.24940205	9.00241470	2.24522068		56.00000000	0.61321429	5.52040930	1.217798
57	0.25952426	8.98043440	2.33064059		57.00000000	0.60245614	5.41031785	1.239139
58	0.26932120	9.00767520	2.42595789		58.00000000	0.59206897	5.33316494	1.260518
59	0.27951559	8.99722290	2.51486407		59.00000000	0.58203390	5.23668872	1.281988
60	0.28933564	8.99026780	2.60120489		60.00000000	0.57233333	5.14542994	1.303359
61	0.29947048	8.98890880	2.69191283		61.00000000	0.56295082	5.06031358	1.324708
62	0.30929425	8.99249550	2.78132715		62.00000000	0.55387097	4.98068219	1.346080
63	0.31942612	9.01470950	2.87953368		63.00000000	0.54507937	4.91373213	1.367549
64	0.32927296	8.97813510	2.95625712		64.00000000	0.53656250	4.81733061	1.388930
65	0.33941749	8.99447630	3.05288257		65.00000000	0.52830769	4.75185102	1.410289
66	0.34921741	8.98796080	3.13875239		66.00000000	0.52030303	4.67646324	1.431665
67	0.35937461	8.99306580	3.23187951		67.00000000	0.51253731	4.60928178	1.453134
68	0.36952734	8.99367050	3.32340714		68.00000000	0.50500000	4.54180360	1.474519
69	0.37931535	8.98705670	3.40892856		69.00000000	0.49768116	4.47268880	1.495879
70	0.38949114	9.00241470	3.50636076		70.00000000	0.49057143	4.41632744	1.517255
71	0.39931786	8.97900580	3.58547738		71.00000000	0.48366197	4.34280365	1.538731
72	0.40946686	9.00125690	3.68571640		72.00000000	0.47694444	4.29309947	1.560119
73	0.41928914	8.98139380	3.76580088		73.00000000	0.47041096	4.22494607	1.581476
74	0.42944038	8.99793720	3.86407757		74.00000000	0.46405405	4.17552924	1.602839
75	0.43925220	8.97586060	3.94266652		75.00000000	0.45786667	4.10974737	1.624319
76	0.44941014	8.99443440	4.04219002		76.00000000	0.45184211	4.06406417	1.645681
77	0.45954797	8.97770790	4.12568744		77.00000000	0.44597403	4.00382454	1.667060
78	0.46940374	8.98463540	4.21742146		78.00000000	0.44025641	3.95554333	1.688419
79	0.47956017	8.96999930	4.30165439		79.00000000	0.43468354	3.89911109	1.709891
80	0.48935565	8.94723800	4.37838147		80.00000000	0.42925000	3.84060191	1.731281
81	0.49952027	8.95124440	4.47132802		81.00000000	0.42395062	3.79488559	1.752662
82	0.50933731	8.92211630	4.54436672		82.00000000	0.41878049	3.73640822	1.774133
83	0.51947439	8.89747240	4.62200905		83.00000000	0.41373494	3.68119521	1.795523
84	0.52924532	8.85325620	4.68554441		84.00000000	0.40880952	3.61929545	1.816865
85	0.53939730	8.78306770	4.73756300		85.00000000	0.40400000	3.54835935	1.838239
86	0.54951799	8.71378900	4.78838382		86.00000000	0.39930233	3.47943621	1.859721
87	0.55934918	8.58739570	4.80335274		87.00000000	0.39471264	3.38955366	1.881091
88	0.56949371	8.41931530	4.79474711		88.00000000	0.39022727	3.28544645	1.902444
89	0.57928997	8.17782120	4.73732980		89.00000000	0.38584270	3.15535258	1.923825
90	0.58940995	7.85053160	4.62718144		90.00000000	0.38155556	2.99541395	1.945307
91	0.59920317	7.44076970	4.45853279		91.00000000	0.37736264	2.80786848	1.966684
92	0.60932088	6.87855100	4.19124475		92.00000000	0.37326087	2.56749393	1.988157
93	0.61913645	6.17391490	3.82249575		93.00000000	0.36924731	2.27970148	2.009563
94	0.62924826	5.25277760	3.30530116		94.00000000	0.36531915	1.91894024	2.031054
95	0.63936377	4.10988520	2.62771170		95.00000000	0.36147368	1.48561534	2.052432
96	0.64914656	2.74235200	1.78018837		96.00000000	0.35770833	0.98096216	2.073766
97	0.65924424	1.04640330	0.68983535		97.00000000	0.35402062	0.37044834	2.095147
98	0.66898906	-0.91256559	-0.61049640		98.00000000	0.35040816	-0.31977043	2.116635
99	0.67904878	-3.29860520	-2.23991384		99.00000000	0.34686869	-1.14418285	2.138019
100	0.68880701	-6.03407480	-4.15631302		100.00000000	0.34340000	-2.07210129	2.159446
101	0.69909447	-9.33331300	-6.52486751		101.00000000	0.34000000	-3.17332642	2.180836
13:05 02/04/2018
Test Lot:	JK-PERC
Recipe:	Recipe_YJX-LID
Cell Name:	1-20-20min
Test Order:	4
Test Condition:	Light
1	-0.29987088	8.99410820	-2.69707114		1.00000000	34.34000000	308.85767559	0.000000
2	-0.29003650	8.99849410	-2.60989173		2.00000000	17.17000000	154.50414370	0.061802
3	-0.27991110	8.98522470	-2.51506413		3.00000000	11.44666667	102.85087207	0.083222
4	-0.27009833	9.00224590	-2.43149158		4.00000000	8.58500000	77.28428105	0.104775
5	-0.25996473	8.99035640	-2.33717557		5.00000000	6.86800000	61.74576776	0.126157
6	-0.24978650	8.98555370	-2.24447001		6.00000000	5.72333333	51.42731901	0.147531
7	-0.23995733	8.99729060	-2.15896583		7.00000000	4.90571429	44.13813703	0.168908
8	-0.22982895	8.99787520	-2.06797221		8.00000000	4.29250000	38.62337930	0.190403
9	-0.21999310	8.98929020	-1.97758182		9.00000000	3.81555556	34.29913616	0.211796
10	-0.20983867	9.00246430	-1.88906514		10.00000000	3.43400000	30.91446241	0.233171
11	-0.20000653	8.99409480	-1.79887769		11.00000000	3.12181818	28.07792868	0.254521
12	-0.18987966	8.99579720	-1.70811891		12.00000000	2.86166667	25.74297299	0.275999
13	-0.18007356	8.99860760	-1.62041131		13.00000000	2.64153846	23.77016808	0.297382
14	-0.16992062	8.99561880	-1.52854112		14.00000000	2.45285714	22.06496783	0.318762
15	-0.16010933	9.00319000	-1.44149472		15.00000000	2.28933333	20.61130297	0.340177
16	-0.14994970	8.99411010	-1.34866411		16.00000000	2.14625000	19.30360880	0.361643
17	-0.13980718	9.00614070	-1.25912313		17.00000000	2.02000000	18.19240421	0.383012
18	-0.12996984	8.98635670	-1.16795534		18.00000000	1.90777778	17.14397162	0.404377
19	-0.11982062	8.99672990	-1.07799375		19.00000000	1.80736842	16.26040551	0.425754
20	-0.11000708	8.99135970	-0.98911323		20.00000000	1.71700000	15.43816460	0.447297
21	-0.09984969	8.99927710	-0.89857499		21.00000000	1.63523810	14.71596074	0.468687
22	-0.09003094	8.99498080	-0.80982656		22.00000000	1.56090909	14.04034730	0.490044
23	-0.07992639	8.99911980	-0.71926712		23.00000000	1.49304348	13.43607713	0.511411
24	-0.07007638	8.99471570	-0.63031715		24.00000000	1.43083333	12.86993905	0.532886
25	-0.05996364	9.00151440	-0.53976357		25.00000000	1.37360000	12.36448018	0.554272
26	-0.04976977	8.99810220	-0.44783351		26.00000000	1.32076923	11.88441652	0.575669
27	-0.03995624	9.00018310	-0.35961346		27.00000000	1.27185185	11.44689954	0.597004
28	-0.02982415	8.98889640	-0.26808615		28.00000000	1.22642857	11.02423937	0.618484
29	-0.02002103	8.99025150	-0.17999410		29.00000000	1.18413793	10.64569781	0.639880
30	-0.00988150	8.98407650	-0.08877611		30.00000000	1.14466667	10.28377290	0.661262
31	-0.00066265	9.01078030	-0.00597102		31.00000000	1.10774194	9.98161921	0.682869
32	0.00948412	8.97637370	0.08513299		32.00000000	1.07312500	9.63277103	0.704259
33	0.01931003	8.99959560	0.17378242		33.00000000	1.04060606	9.36503372	0.725602
34	0.02942620	8.98283200	0.26433059		34.00000000	1.01000000	9.07266032	0.746969
35	0.03930197	9.00191210	0.35379291		35.00000000	0.98114286	8.83216176	0.768455
36	0.04943229	8.99227620	0.44450880		36.00000000	0.95388889	8.57763235	0.789832
37	0.05926340	8.99724580	0.53320741		37.00000000	0.92810811	8.35041678	0.811183
38	0.06941158	8.99027160	0.62402898		38.00000000	0.90368421	8.12436649	0.832561
39	0.07954041	8.98417660	0.71460508		39.00000000	0.88051282	7.91068268	0.854039
40	0.08937004	8.99533180	0.80391318		40.00000000	0.85850000	7.72249235	0.875427
41	0.09951524	9.00225260	0.89586130		41.00000000	0.83756098	7.53993547	0.896775
42	0.10935082	9.00041010	0.98420222		42.00000000	0.81761905	7.35890673	0.918141
43	0.11947295	8.98773480	1.07379119		43.00000000	0.79860465	7.17764681	0.939626
44	0.12930407	8.99358750	1.16290747		44.00000000	0.78045455	7.01908624	0.961005
45	0.13948722	8.98955250	1.25392769		45.00000000	0.76311111	6.86002740	0.982353
46	0.14927220	9.00850200	1.34471891		46.00000000	0.74652174	6.72504258	1.003735
47	0.15944271	9.00109580	1.43515911		47.00000000	0.73063830	6.57654531	1.025213
48	0.16960651	8.99407670	1.52545396		48.00000000	0.71541667	6.43451237	1.046603
49	0.17942795	9.00636290	1.61599323		49.00000000	0.70081633	6.31180616	1.067958
50	0.18956497	8.98457050	1.70315984		50.00000000	0.68680000	6.17060302	1.089321
51	0.19933729	8.99631120	1.79330029		51.00000000	0.67333333	6.05751621	1.110805
52	0.20949291	8.98345760	1.88197067		52.00000000	0.66038462	5.93253719	1.132183
53	0.21931510	8.99767970	1.97332702		53.00000000	0.64792453	5.82981738	1.153553
54	0.22946699	8.99187180	2.06333776		54.00000000	0.63592593	5.71816440	1.174934
55	0.23926090	8.98269370	2.14920738		55.00000000	0.62436364	5.60846730	1.196409
56	0.24940833	8.99806880	2.24419331		56.00000000	0.61321429	5.51774433	1.217783
57	0.25956023	8.98833560	2.33301446		57.00000000	0.60245614	5.41507797	1.239173
58	0.26938391	8.98990440	2.42173560		58.00000000	0.59206897	5.32264340	1.260519
59	0.27955589	8.98775200	2.51257901		59.00000000	0.58203390	5.23117633	1.281995
60	0.28934383	8.99523830	2.60271670		60.00000000	0.57233333	5.14827472	1.303387
61	0.29952180	8.99681850	2.69474327		61.00000000	0.56295082	5.06476635	1.324773
62	0.30936036	9.00546650	2.78593436		62.00000000	0.55387097	4.98786645	1.346250
63	0.31946313	8.98851780	2.87150003		63.00000000	0.54507937	4.89945558	1.367649
64	0.32928979	9.00084210	2.96388540		64.00000000	0.53656250	4.82951434	1.388990
65	0.33944616	8.99805550	3.05435539		65.00000000	0.52830769	4.75374194	1.410371
66	0.34924898	8.98794170	3.13902947		66.00000000	0.52030303	4.67645330	1.431862
67	0.35941726	8.98430730	3.22911511		67.00000000	0.51253731	4.60479273	1.453245
68	0.36955652	8.98270700	3.31961794		68.00000000	0.50500000	4.53626704	1.474606
69	0.37936902	8.99482250	3.41235700		69.00000000	0.49768116	4.47655369	1.495977
70	0.38951272	8.99437050	3.50342172		70.00000000	0.49057143	4.41238119	1.517444
71	0.39936319	8.98456380	3.58810406		71.00000000	0.48366197	4.34549184	1.538839
72	0.40947342	8.99936390	3.68500031		72.00000000	0.47694444	4.29219662	1.560190
73	0.41932315	8.97530360	3.76355258		73.00000000	0.47041096	4.22208117	1.581567
74	0.42942593	8.98464110	3.85823786		74.00000000	0.46405405	4.16935913	1.603064
75	0.43926299	8.99836540	3.95264889		75.00000000	0.45786667	4.12005157	1.624441
76	0.44944167	8.96900180	4.03104315		76.00000000	0.45184211	4.05257266	1.645795
77	0.45957795	8.98136140	4.12763566		77.00000000	0.44597403	4.00545390	1.667184
78	0.46944702	8.96846960	4.21022133		78.00000000	0.44025641	3.94842623	1.688676
79	0.47956842	8.98025700	4.30664766		79.00000000	0.43468354	3.90356994	1.710055
80	0.48940995	8.95327660	4.38182265		80.00000000	0.42925000	3.84319398	1.731404
81	0.49955067	8.95313260	4.47254339		81.00000000	0.42395062	3.79568609	1.752772
82	0.50934535	8.92355540	4.54517145		82.00000000	0.41878049	3.73701088	1.774247
83	0.51949573	8.89853760	4.62275229		83.00000000	0.41373494	3.68163592	1.795631
84	0.52927327	8.85133270	4.68477380		84.00000000	0.40880952	3.61850911	1.816993
85	0.53940952	8.79388050	4.74350286		85.00000000	0.40400000	3.55272772	1.838365
86	0.54955328	8.71270370	4.78809490		86.00000000	0.39930233	3.47900285	1.859851
87	0.55938214	8.58305840	4.80120958		87.00000000	0.39471264	3.38784167	1.881233
88	0.56948638	8.42289640	4.79672478		88.00000000	0.39022727	3.28684389	1.902623
89	0.57932049	8.18344210	4.74083569		89.00000000	0.38584270	3.15752137	1.923978
90	0.58944190	7.86120940	4.63372621		90.00000000	0.38155556	2.99948812	1.945442
91	0.59924549	7.44076630	4.45884565		91.00000000	0.37736264	2.80786719	1.966832
92	0.60934156	6.89122340	4.19910882		92.00000000	0.37326087	2.57222404	1.988314
93	0.61917192	6.17043350	3.82055916		93.00000000	0.36924731	2.27841598	2.009827
94	0.62924641	5.26215460	3.31119189		94.00000000	0.36531915	1.92236584	2.031210
95	0.63939011	4.11745070	2.63265726		95.00000000	0.36147368	1.48835007	2.052565
96	0.64915872	2.75751570	1.79006536		96.00000000	0.35770833	0.98638635	2.073950
97	0.65927565	1.04513820	0.68903417		97.00000000	0.35402062	0.37000047	2.095427
98	0.66900998	-0.92534322	-0.61906385		98.00000000	0.35040816	-0.32424782	2.116854
99	0.67907184	-3.32471510	-2.25772040		99.00000000	0.34686869	-1.15323956	2.138218
100	0.68882632	-6.08799410	-4.19357057		100.00000000	0.34340000	-2.09061717	2.159601
101	0.69913375	-9.41879840	-6.58499985		101.00000000	0.34000000	-3.20239146	2.181097
