# Supplementary material for: Study on the Electrical Injection Regeneration of Industrialized B-Doped Czochralski Silicon PERC Solar Cells
Source: Hindawi journal article supplement (doi:10.1155/2019/5357370), 2019-06-20
Supplement: f1 [file 5357370.f1.zip › section3.2/IVRawData_1-20-30min.csv]

13:26 02/04/2018
Test Lot:	JK-PERC
Recipe:	Recipe_YJX-LID
Cell Name:	1-20-30min
Test Order:	2
Test Condition:	Light
1	-0.29986179	9.01019950	-2.70181455		1.00000000	34.34000000	309.41025083	0.000000
2	-0.29006374	8.99813370	-2.61003231		2.00000000	17.17000000	154.49795563	0.061795
3	-0.27995607	9.00875950	-2.52205691		3.00000000	11.44666667	103.12026708	0.083247
4	-0.27010071	9.00357440	-2.43187184		4.00000000	8.58500000	77.29568622	0.104763
5	-0.25996995	9.01076980	-2.34252937		5.00000000	6.86800000	61.88596699	0.126158
6	-0.24979901	9.00652120	-2.24982008		6.00000000	5.72333333	51.54732300	0.147555
7	-0.23999949	9.01366710	-2.16327551		7.00000000	4.90571429	44.21847546	0.168906
8	-0.22985162	9.00174330	-2.06906528		8.00000000	4.29250000	38.63998312	0.190394
9	-0.22000891	9.00059320	-1.98021070		9.00000000	3.81555556	34.34226339	0.211789
10	-0.20984839	9.01421170	-1.89161781		10.00000000	3.43400000	30.95480298	0.233174
11	-0.20005184	9.00709060	-1.80188505		11.00000000	3.12181818	28.11849920	0.254669
12	-0.18992853	8.99984070	-1.70932651		12.00000000	2.86166667	25.75454414	0.276059
13	-0.18014464	9.01230050	-1.62351763		13.00000000	2.64153846	23.80633840	0.297414
14	-0.16999230	8.98974420	-1.52818729		14.00000000	2.45285714	22.05055827	0.318789
15	-0.16013843	9.00673680	-1.44232469		15.00000000	2.28933333	20.61942278	0.340276
16	-0.15002331	9.01912780	-1.35307941		16.00000000	2.14625000	19.35730304	0.361656
17	-0.13989107	8.99463560	-1.25826920		17.00000000	2.02000000	18.16916391	0.383003
18	-0.13007145	9.00910950	-1.17182794		18.00000000	1.90777778	17.18737890	0.404383
19	-0.11991167	9.00555990	-1.07987173		19.00000000	1.80736842	16.27636458	0.425874
20	-0.11008162	9.00339220	-0.99110800		20.00000000	1.71700000	15.45882441	0.447264
21	-0.09994939	9.00386810	-0.89993112		21.00000000	1.63523810	14.72346812	0.468612
22	-0.09009031	9.00647930	-0.81139653		22.00000000	1.56090909	14.05829542	0.489978
23	-0.07995882	8.99687390	-0.71937941		23.00000000	1.49304348	13.43272390	0.511459
24	-0.07013175	9.00444030	-0.63149715		24.00000000	1.43083333	12.88385333	0.532828
25	-0.05997420	9.00743390	-0.54021365		25.00000000	1.37360000	12.37261121	0.554170
26	-0.04983378	9.01826860	-0.44941440		26.00000000	1.32076923	11.91105168	0.575554
27	-0.03998140	8.98339270	-0.35916861		27.00000000	1.27185185	11.42554464	0.597043
28	-0.02987149	9.01610570	-0.26932453		28.00000000	1.22642857	11.05760963	0.618438
29	-0.02003102	8.99592210	-0.18019753		29.00000000	1.18413793	10.65241258	0.639795
30	-0.00988613	9.00965880	-0.08907069		30.00000000	1.14466667	10.31305611	0.661176
31	-0.00065748	9.00562670	-0.00592105		31.00000000	1.10774194	9.97591035	0.682772
32	0.00949985	9.01059340	0.08559930		32.00000000	1.07312500	9.66949304	0.704163
33	0.01932441	9.00867750	0.17408739		33.00000000	1.04060606	9.37448440	0.725523
34	0.02947645	8.99731920	0.26520907		34.00000000	1.01000000	9.08729239	0.746892
35	0.03926380	9.00781820	0.35368117		35.00000000	0.98114286	8.83795649	0.768376
36	0.04942850	8.99750140	0.44473297		36.00000000	0.95388889	8.58261661	0.789753
37	0.05922998	9.00084400	0.53311982		37.00000000	0.92810811	8.35375630	0.811135
38	0.06943189	9.00106720	0.62496114		38.00000000	0.90368421	8.13412231	0.832500
39	0.07955714	9.00509450	0.71641959		39.00000000	0.88051282	7.92910116	0.853974
40	0.08939733	8.99975400	0.80455394		40.00000000	0.85850000	7.72628881	0.875369
41	0.09951365	9.01218700	0.89683562		41.00000000	0.83756098	7.54825614	0.896755
42	0.10933077	8.99543000	0.98347729		42.00000000	0.81761905	7.35483491	0.918244
43	0.11949100	8.99758630	1.07513058		43.00000000	0.79860465	7.18551427	0.939635
44	0.12929396	8.99403190	1.16287400		44.00000000	0.78045455	7.01943308	0.960988
45	0.13945495	9.00394440	1.25564462		45.00000000	0.76311111	6.87101002	0.982372
46	0.14924526	9.00265790	1.34360402		46.00000000	0.74652174	6.72067983	1.003861
47	0.15942337	9.00478080	1.43557250		47.00000000	0.73063830	6.57923772	1.025246
48	0.16956647	8.99337580	1.52497499		48.00000000	0.71541667	6.43401094	1.046594
49	0.17938954	9.00055980	1.61460628		49.00000000	0.70081633	6.30773926	1.067976
50	0.18953712	8.99507810	1.70490120		50.00000000	0.68680000	6.17781964	1.089470
51	0.19930586	9.01744750	1.79723013		51.00000000	0.67333333	6.07174798	1.110861
52	0.20944451	9.00303170	1.88563556		52.00000000	0.66038462	5.94546363	1.132217
53	0.21927725	9.01616860	1.97704066		53.00000000	0.64792453	5.84179679	1.153587
54	0.22941887	8.99039170	2.06256550		54.00000000	0.63592593	5.71722317	1.175062
55	0.23924045	9.00946710	2.15542896		55.00000000	0.62436364	5.62518364	1.196441
56	0.24938804	8.99601750	2.24349917		56.00000000	0.61321429	5.51648645	1.217776
57	0.25954530	9.01002600	2.33850990		57.00000000	0.60245614	5.42814549	1.239155
58	0.26936612	8.99871640	2.42394932		58.00000000	0.59206897	5.32786071	1.260637
59	0.27952039	9.00033190	2.51577628		59.00000000	0.58203390	5.23849826	1.282006
60	0.28934497	9.00273800	2.60489696		60.00000000	0.57233333	5.15256705	1.303377
61	0.29949179	9.00855730	2.69798895		61.00000000	0.56295082	5.07137472	1.324759
62	0.30932230	8.98731610	2.77997729		62.00000000	0.55387097	4.97781347	1.346299
63	0.31946692	9.01118370	2.87877510		63.00000000	0.54507937	4.91181029	1.367675
64	0.32929742	9.00095080	2.96398988		64.00000000	0.53656250	4.82957266	1.389048
65	0.33943903	9.00310990	3.05600689		65.00000000	0.52830769	4.75641221	1.410423
66	0.34926212	8.99761490	3.14252605		66.00000000	0.52030303	4.68148630	1.431905
67	0.35940820	9.00668620	3.23707688		67.00000000	0.51253731	4.61626275	1.453298
68	0.36954537	9.00413800	3.32743751		68.00000000	0.50500000	4.54708969	1.474686
69	0.37937737	8.98702240	3.40947292		69.00000000	0.49768116	4.47267173	1.496044
70	0.38953015	8.98904990	3.50150596		70.00000000	0.49057143	4.40977105	1.517526
71	0.39935249	9.01595210	3.60054292		71.00000000	0.48366197	4.36067317	1.538913
72	0.40949410	8.99794480	3.68460531		72.00000000	0.47694444	4.29151978	1.560309
73	0.41932759	8.98607920	3.76811093		73.00000000	0.47041096	4.22715013	1.581795
74	0.42946327	8.99593070	3.86342182		74.00000000	0.46405405	4.17459811	1.603174
75	0.43928781	8.99473760	3.95127858		75.00000000	0.45786667	4.11839052	1.624532
76	0.44941902	8.99945550	4.04452647		76.00000000	0.45184211	4.06633292	1.645905
77	0.45957330	8.98321440	4.12844549		77.00000000	0.44597403	4.00628029	1.667395
78	0.46943432	8.98606970	4.21836952		78.00000000	0.44025641	3.95617479	1.688772
79	0.47954619	8.96739010	4.30027776		79.00000000	0.43468354	3.89797691	1.710128
80	0.48935586	8.97093960	4.38998186		80.00000000	0.42925000	3.85077582	1.731496
81	0.49951607	8.95574470	4.47353840		81.00000000	0.42395062	3.79679349	1.752979
82	0.50932723	8.92955590	4.54806597		82.00000000	0.41878049	3.73952378	1.774373
83	0.51946962	8.91595940	4.63157004		83.00000000	0.41373494	3.68884393	1.795726
84	0.52925920	8.85528180	4.68673936		84.00000000	0.40880952	3.62012354	1.817099
85	0.53938520	8.79422190	4.74347314		85.00000000	0.40400000	3.55286565	1.838594
86	0.54952753	8.70689960	4.78468103		86.00000000	0.39930233	3.47668526	1.859978
87	0.55935287	8.60234640	4.81174715		87.00000000	0.39471264	3.39545489	1.881336
88	0.56945878	8.42848870	4.79967689		88.00000000	0.39022727	3.28902616	1.902719
89	0.57928407	8.21067240	4.75631173		89.00000000	0.38584270	3.16802798	1.924201
90	0.58941972	7.88062950	4.64499843		90.00000000	0.38155556	3.00689797	1.945573
91	0.59921151	7.47409820	4.47856567		91.00000000	0.37736264	2.82044541	1.966928
92	0.60934275	6.90834280	4.20954860		92.00000000	0.37326087	2.57861404	1.988406
93	0.61915690	6.20336480	3.84085612		93.00000000	0.36924731	2.29057578	2.009911
94	0.62924790	5.27640720	3.32016815		94.00000000	0.36531915	1.92757259	2.031296
95	0.63935155	4.13402990	2.64309842		95.00000000	0.36147368	1.49434302	2.052651
96	0.64916569	2.75568340	1.78889512		96.00000000	0.35770833	0.98573092	2.074069
97	0.65922022	1.04247240	0.68721888		97.00000000	0.35402062	0.36905672	2.095566
98	0.66899270	-0.93545419	-0.62581202		98.00000000	0.35040816	-0.32779078	2.116973
99	0.67905098	-3.33682940	-2.26587727		99.00000000	0.34686869	-1.15744163	2.138371
100	0.68881375	-6.10620310	-4.20603666		100.00000000	0.34340000	-2.09687014	2.159719
101	0.69913548	-9.44902040	-6.60614541		101.00000000	0.34000000	-3.21266694	2.181198
13:27 02/04/2018
Test Lot:	JK-PERC
Recipe:	Recipe_YJX-LID
Cell Name:	1-20-30min
Test Order:	3
Test Condition:	Light
1	-0.29990736	8.99638080	-2.69808082		1.00000000	34.34000000	308.93571667	0.000000
2	-0.29009667	9.02335260	-2.61764454		2.00000000	17.17000000	154.93096414	0.061780
3	-0.27993092	8.99403100	-2.51770737		3.00000000	11.44666667	102.95167485	0.083201
4	-0.27011576	9.02528380	-2.43787139		4.00000000	8.58500000	77.48206142	0.104699
5	-0.25995746	9.00281050	-2.34034775		5.00000000	6.86800000	61.83130251	0.126081
6	-0.24982224	9.00822930	-2.25045602		6.00000000	5.72333333	51.55709903	0.147433
7	-0.23999144	8.99626540	-2.15902669		7.00000000	4.90571429	44.13310769	0.168821
8	-0.22985026	9.00953770	-2.07084458		8.00000000	4.29250000	38.67344058	0.190299
9	-0.22003064	9.00411420	-1.98118101		9.00000000	3.81555556	34.35569796	0.211674
10	-0.20985968	8.99231050	-1.88712340		10.00000000	3.43400000	30.87959426	0.233098
11	-0.20009884	8.99430660	-1.79975032		11.00000000	3.12181818	28.07858988	0.254492
12	-0.18993311	9.02321240	-1.71380679		12.00000000	2.86166667	25.82142615	0.275984
13	-0.18017228	9.00080970	-1.62169641		13.00000000	2.64153846	23.77598501	0.297371
14	-0.17000133	8.99673940	-1.52945766		14.00000000	2.45285714	22.06771650	0.318716
15	-0.16017202	8.99926760	-1.44143087		15.00000000	2.28933333	20.60232329	0.340089
16	-0.15000553	8.99676320	-1.34956423		16.00000000	2.14625000	19.30930302	0.361572
17	-0.13987404	9.01348500	-1.26075256		17.00000000	2.02000000	18.20723970	0.382945
18	-0.13005441	9.00292590	-1.17087022		18.00000000	1.90777778	17.17558197	0.404349
19	-0.11991546	8.99652580	-1.07882253		19.00000000	1.80736842	16.26003663	0.425715
20	-0.11009137	8.99731160	-0.99052636		20.00000000	1.71700000	15.44838402	0.447187
21	-0.09995615	9.00878050	-0.90048299		21.00000000	1.63523810	14.73150107	0.468580
22	-0.09011493	8.99753380	-0.81081212		22.00000000	1.56090909	14.04433230	0.489961
23	-0.08000278	9.01798250	-0.72146364		23.00000000	1.49304348	13.46423996	0.511298
24	-0.07014816	8.99940490	-0.63129172		24.00000000	1.43083333	12.87664851	0.532769
25	-0.05999210	9.00216290	-0.54005867		25.00000000	1.37360000	12.36537096	0.554141
26	-0.04984349	8.99557300	-0.44837072		26.00000000	1.32076923	11.88107603	0.575523
27	-0.04002757	9.01218130	-0.36073575		27.00000000	1.27185185	11.46215948	0.597002
28	-0.02987747	9.00259210	-0.26897463		28.00000000	1.22642857	11.04103617	0.618453
29	-0.02004667	9.00008200	-0.18042164		29.00000000	1.18413793	10.65733848	0.639836
30	-0.00989582	8.99853710	-0.08904787		30.00000000	1.14466667	10.30032547	0.661216
31	-0.00067758	9.00003240	-0.00609826		31.00000000	1.10774194	9.96971331	0.682671
32	0.00947827	9.00756170	0.08537612		32.00000000	1.07312500	9.66623965	0.704162
33	0.01929242	8.99778940	0.17358910		33.00000000	1.04060606	9.36315418	0.725548
34	0.02940576	9.01253990	0.26502061		34.00000000	1.01000000	9.10266530	0.746955
35	0.03926382	8.99454500	0.35316018		35.00000000	0.98114286	8.82493358	0.768367
36	0.04939801	9.00833320	0.44499372		36.00000000	0.95388889	8.59294895	0.789870
37	0.05922332	8.99736020	0.53285352		37.00000000	0.92810811	8.35052295	0.811248
38	0.06940588	8.99900720	0.62458405		38.00000000	0.90368421	8.13226072	0.832634
39	0.07952593	9.01541040	0.71695885		39.00000000	0.88051282	7.93818444	0.853989
40	0.08935421	9.00473500	0.80461098		40.00000000	0.85850000	7.73056500	0.875464
41	0.09951370	9.00766560	0.89638615		41.00000000	0.83756098	7.54446919	0.896850
42	0.10928840	9.00245190	0.98386356		42.00000000	0.81761905	7.36057615	0.918231
43	0.11944640	8.99422650	1.07432798		43.00000000	0.79860465	7.18283112	0.939719
44	0.12927915	8.99964810	1.16346686		44.00000000	0.78045455	7.02381627	0.961100
45	0.13943270	9.00622370	1.25576209		45.00000000	0.76311111	6.87274937	0.982458
46	0.14923939	9.00242520	1.34351645		46.00000000	0.74652174	6.72050612	1.003836
47	0.15939814	9.00005250	1.43459163		47.00000000	0.73063830	6.57578304	1.025315
48	0.16953680	8.99585820	1.52512901		48.00000000	0.71541667	6.43578689	1.046689
49	0.17938071	9.00847820	1.61594722		49.00000000	0.70081633	6.31328860	1.068051
50	0.18948364	8.99614240	1.70462181		50.00000000	0.68680000	6.17855060	1.089427
51	0.19928215	9.00630380	1.79479558		51.00000000	0.67333333	6.06424456	1.110901
52	0.20942378	8.99663260	1.88410881		52.00000000	0.66038462	5.94123776	1.132273
53	0.21924686	9.00388240	1.97407294		53.00000000	0.64792453	5.83383626	1.153636
54	0.22942050	9.00151060	2.06513106		54.00000000	0.63592593	5.72429396	1.175023
55	0.23920487	8.99273780	2.15110668		55.00000000	0.62436364	5.61473847	1.196515
56	0.24937329	9.01280210	2.24755211		56.00000000	0.61321429	5.52677900	1.217908
57	0.25954843	8.98686500	2.33252670		57.00000000	0.60245614	5.41419200	1.239268
58	0.26936257	9.00856020	2.42656893		58.00000000	0.59206897	5.33368892	1.260636
59	0.27949005	8.99821470	2.51491148		59.00000000	0.58203390	5.23726598	1.282112
60	0.28933397	9.00454810	2.60532165		60.00000000	0.57233333	5.15360303	1.303506
61	0.29947558	9.00849150	2.69782322		61.00000000	0.56295082	5.07133767	1.324848
62	0.30928603	8.99382880	2.78166560		62.00000000	0.55387097	4.98142066	1.346223
63	0.31944478	9.01739980	2.88056130		63.00000000	0.54507937	4.91519856	1.367692
64	0.32926857	8.98759560	2.95933275		64.00000000	0.53656250	4.82240676	1.389063
65	0.33941841	9.01695920	3.06052195		65.00000000	0.52830769	4.76372891	1.410431
66	0.34922585	8.99381540	3.14087283		66.00000000	0.52030303	4.67950941	1.431800
67	0.35937491	9.01148890	3.23850301		67.00000000	0.51253731	4.61872431	1.453271
68	0.36952624	8.98333550	3.31957819		68.00000000	0.50500000	4.53658443	1.474650
69	0.37936494	9.00429630	3.41591433		69.00000000	0.49768116	4.48126862	1.496049
70	0.38949913	8.99988170	3.50544609		70.00000000	0.49057143	4.41508482	1.517385
71	0.39932367	8.98939320	3.58967748		71.00000000	0.48366197	4.34782764	1.538923
72	0.40945861	9.00958440	3.68905191		72.00000000	0.47694444	4.29707123	1.560307
73	0.41930848	8.99231530	3.77055406		73.00000000	0.47041096	4.23008366	1.581682
74	0.42944938	9.00316140	3.86640208		74.00000000	0.46405405	4.17795355	1.603172
75	0.43927094	8.99165820	3.94977415		75.00000000	0.45786667	4.11698057	1.624541
76	0.44940811	8.98285290	4.03696694		76.00000000	0.45184211	4.05883117	1.645924
77	0.45953113	8.98470210	4.12875031		77.00000000	0.44597403	4.00694377	1.667308
78	0.46939069	8.97946360	4.21487662		78.00000000	0.44025641	3.95326641	1.688783
79	0.47954422	8.98159310	4.30707106		79.00000000	0.43468354	3.90415072	1.710158
80	0.48936805	8.97002600	4.38964413		80.00000000	0.42925000	3.85038366	1.731519
81	0.49948138	8.95123860	4.47097701		81.00000000	0.42395062	3.79488313	1.752890
82	0.50931638	8.94224170	4.55443017		82.00000000	0.41878049	3.74483634	1.774364
83	0.51944309	8.89786050	4.62193215		83.00000000	0.41373494	3.68135578	1.795745
84	0.52923793	8.86821650	4.69339654		84.00000000	0.40880952	3.62541136	1.817093
85	0.53937507	8.80694010	4.75024393		85.00000000	0.40400000	3.55800380	1.838461
86	0.54952788	8.71538160	4.78934517		86.00000000	0.39930233	3.48007214	1.859949
87	0.55934799	8.59783650	4.80918256		87.00000000	0.39471264	3.39367477	1.881331
88	0.56947249	8.43084340	4.80113338		88.00000000	0.39022727	3.28994503	1.902695
89	0.57926208	8.20609090	4.75347728		89.00000000	0.38584270	3.16626024	1.924069
90	0.58938956	7.87236930	4.63989228		90.00000000	0.38155556	3.00374624	1.945541
91	0.59921634	7.46155170	4.47108370		91.00000000	0.37736264	2.81571083	1.966944
92	0.60932225	6.91820810	4.21541813		92.00000000	0.37326087	2.58229637	1.988408
93	0.61912149	6.19685550	3.83660641		93.00000000	0.36924731	2.28817224	2.009810
94	0.62923712	5.27709870	3.32054639		94.00000000	0.36531915	1.92782521	2.031305
95	0.63936311	4.13701300	2.64505350		95.00000000	0.36147368	1.49542133	2.052677
96	0.64912885	2.76878980	1.79730134		96.00000000	0.35770833	0.99041918	2.074040
97	0.65925187	1.04717720	0.69035353		97.00000000	0.35402062	0.37072232	2.095403
98	0.66893429	-0.91655266	-0.61311350		98.00000000	0.35040816	-0.32116753	2.116885
99	0.67902905	-3.33752060	-2.26627344		99.00000000	0.34686869	-1.15768139	2.138307
100	0.68882161	-6.08659320	-4.19257693		100.00000000	0.34340000	-2.09013610	2.159696
101	0.69911581	-9.44153020	-6.60072303		101.00000000	0.34000000	-3.21012027	2.181053
13:27 02/04/2018
Test Lot:	JK-PERC
Recipe:	Recipe_YJX-LID
Cell Name:	1-20-30min
Test Order:	4
Test Condition:	Light
1	-0.29992035	9.00357440	-2.70035519		1.00000000	34.34000000	309.18274490	0.000000
2	-0.29009643	9.00370980	-2.61194407		2.00000000	17.17000000	154.59369727	0.061783
3	-0.27994356	9.00688930	-2.52142066		3.00000000	11.44666667	103.09885952	0.083200
4	-0.27013898	9.00691410	-2.43311859		4.00000000	8.58500000	77.32435755	0.104690
5	-0.25995633	8.99213980	-2.33756366		5.00000000	6.86800000	61.75801615	0.126080
6	-0.24981458	9.01624300	-2.25238896		6.00000000	5.72333333	51.60296410	0.147430
7	-0.23999141	8.99903390	-2.15969083		7.00000000	4.90571429	44.14668916	0.168807
8	-0.22981247	9.00807380	-2.07016769		8.00000000	4.29250000	38.66715679	0.190295
9	-0.22001460	8.99281880	-1.97855143		9.00000000	3.81555556	34.31259973	0.211665
10	-0.20987882	9.01945400	-1.89299236		10.00000000	3.43400000	30.97280504	0.233082
11	-0.20005268	8.99226000	-1.79892571		11.00000000	3.12181818	28.07220076	0.254474
12	-0.18989085	9.01257800	-1.71140610		12.00000000	2.86166667	25.79099404	0.275966
13	-0.18011382	9.00130650	-1.62125970		13.00000000	2.64153846	23.77729732	0.297363
14	-0.16996986	9.00593090	-1.53073681		14.00000000	2.45285714	22.09026194	0.318706
15	-0.16013998	8.99450970	-1.44038060		15.00000000	2.28933333	20.59143087	0.340076
16	-0.14998187	8.99479010	-1.34905544		16.00000000	2.14625000	19.30506825	0.361547
17	-0.13982898	8.99869820	-1.25827879		17.00000000	2.02000000	18.17737036	0.382912
18	-0.13002962	9.00265220	-1.17061144		18.00000000	1.90777778	17.17505981	0.404264
19	-0.11984100	9.00576110	-1.07925942		19.00000000	1.80736842	16.27672822	0.425640
20	-0.11003197	8.99085140	-0.98928109		20.00000000	1.71700000	15.43729185	0.447115
21	-0.09987015	9.02053550	-0.90088219		21.00000000	1.63523810	14.75072329	0.468544
22	-0.09006781	9.01069070	-0.81157319		22.00000000	1.56090909	14.06486903	0.489936
23	-0.07990673	8.99432560	-0.71870717		23.00000000	1.49304348	13.42891918	0.511281
24	-0.07008579	9.00716590	-0.63127430		24.00000000	1.43083333	12.88775321	0.532739
25	-0.05995076	8.99805930	-0.53944048		25.00000000	1.37360000	12.35973425	0.554104
26	-0.04982838	9.00424390	-0.44866686		26.00000000	1.32076923	11.89252829	0.575482
27	-0.03999553	8.99283030	-0.35967301		27.00000000	1.27185185	11.43754787	0.596960
28	-0.02982998	8.99681570	-0.26837484		28.00000000	1.22642857	11.03395183	0.618347
29	-0.02002020	9.00115490	-0.18020496		29.00000000	1.18413793	10.65860894	0.639692
30	-0.00987996	9.00305270	-0.08894981		30.00000000	1.14466667	10.30549432	0.661078
31	-0.00064404	9.00514700	-0.00579963		31.00000000	1.10774194	9.97537897	0.682671
32	0.00947516	8.98949620	0.08517691		32.00000000	1.07312500	9.64685311	0.704044
33	0.01932485	9.00214770	0.17396513		33.00000000	1.04060606	9.36768946	0.725412
34	0.02945885	8.99722770	0.26504794		34.00000000	1.01000000	9.08719998	0.746788
35	0.03927206	9.00786400	0.35375739		35.00000000	0.98114286	8.83800142	0.768271
36	0.04943286	8.99544050	0.44467031		36.00000000	0.95388889	8.58065074	0.789667
37	0.05925501	9.00330920	0.53349116		37.00000000	0.92810811	8.35604427	0.811009
38	0.06941133	9.00533010	0.62507194		38.00000000	0.90368421	8.13797462	0.832389
39	0.07954905	8.99716760	0.71571615		39.00000000	0.88051282	7.92212142	0.853869
40	0.08935706	9.00024700	0.80423564		40.00000000	0.85850000	7.72671205	0.875243
41	0.09947915	9.00214480	0.89552575		41.00000000	0.83756098	7.53984518	0.896599
42	0.10931991	8.99026390	0.98281484		42.00000000	0.81761905	7.35061101	0.917973
43	0.11946730	9.00119970	1.07534902		43.00000000	0.79860465	7.18839995	0.939456
44	0.12928499	8.99542710	1.16297370		44.00000000	0.78045455	7.02052197	0.960842
45	0.13944727	9.00575070	1.25582735		45.00000000	0.76311111	6.87238842	0.982186
46	0.14925155	9.00268840	1.34366520		46.00000000	0.74652174	6.72070260	1.003563
47	0.15943319	8.99755480	1.43450886		47.00000000	0.73063830	6.57395812	1.025037
48	0.16956718	8.99166580	1.52469141		48.00000000	0.71541667	6.43278757	1.046421
49	0.17942283	8.99437430	1.61379609		49.00000000	0.70081633	6.30340436	1.067781
50	0.18954046	8.99749180	1.70538873		50.00000000	0.68680000	6.17947737	1.089145
51	0.19929563	8.99329090	1.79232358		51.00000000	0.67333333	6.05548254	1.110622
52	0.20946608	8.99909690	1.88500555		52.00000000	0.66038462	5.94286515	1.132008
53	0.21927334	8.99882510	1.97320244		53.00000000	0.64792453	5.83055951	1.153387
54	0.22942372	9.00563910	2.06610722		54.00000000	0.63592593	5.72691938	1.174737
55	0.23927341	8.99296570	2.15177757		55.00000000	0.62436364	5.61488077	1.196208
56	0.24939923	9.00115300	2.24488063		56.00000000	0.61321429	5.51963561	1.217592
57	0.25955331	8.99296570	2.33415401		57.00000000	0.60245614	5.41786741	1.238975
58	0.26937100	9.00180240	2.42482451		58.00000000	0.59206897	5.32968783	1.260456
59	0.27950796	8.99642660	2.51457285		59.00000000	0.58203390	5.23622524	1.281836
60	0.28936437	8.99355320	2.60241386		60.00000000	0.57233333	5.14731028	1.303189
61	0.29948497	9.00892830	2.69803862		61.00000000	0.56295082	5.07158357	1.324574
62	0.30931157	8.98584270	2.77942511		62.00000000	0.55387097	4.97699739	1.346067
63	0.31944856	9.00165080	2.87556439		63.00000000	0.54507937	4.90661410	1.367437
64	0.32925582	9.00113680	2.96367668		64.00000000	0.53656250	4.82967246	1.388803
65	0.33940396	8.99576280	3.05319752		65.00000000	0.52830769	4.75253069	1.410174
66	0.34924918	9.00076960	3.14351140		66.00000000	0.52030303	4.68312770	1.431644
67	0.35938320	9.00692560	3.23693774		67.00000000	0.51253731	4.61638545	1.453014
68	0.36953950	9.01298520	3.33065404		68.00000000	0.50500000	4.55155753	1.474358
69	0.37936464	8.99620530	3.41284219		69.00000000	0.49768116	4.47724188	1.495745
70	0.38949862	9.00272560	3.50654920		70.00000000	0.49057143	4.41647996	1.517224
71	0.39934012	8.99708940	3.59289876		71.00000000	0.48366197	4.35155000	1.538610
72	0.40945554	9.00073430	3.68540052		72.00000000	0.47694444	4.29285022	1.559974
73	0.41929108	9.00031850	3.77375326		73.00000000	0.47041096	4.23384846	1.581343
74	0.42944294	8.99253370	3.86178011		74.00000000	0.46405405	4.17302172	1.602814
75	0.43925840	8.98856160	3.94830119		75.00000000	0.45786667	4.11556274	1.624209
76	0.44941694	8.99923900	4.04441045		76.00000000	0.45184211	4.06623510	1.645566
77	0.45954201	8.97906590	4.12625799		77.00000000	0.44597403	4.00443017	1.666930
78	0.46942222	8.98094650	4.21585584		78.00000000	0.44025641	3.95391927	1.688421
79	0.47954804	8.96491050	4.29910526		79.00000000	0.43468354	3.89689907	1.709795
80	0.48938060	8.96784400	4.38868888		80.00000000	0.42925000	3.84944704	1.731176
81	0.49952948	8.94144250	4.46651412		81.00000000	0.42395062	3.79073007	1.752544
82	0.50934416	8.94416430	4.55565785		82.00000000	0.41878049	3.74564149	1.774023
83	0.51949012	8.90716550	4.62718447		83.00000000	0.41373494	3.68520558	1.795405
84	0.52927130	8.85328770	4.68579109		84.00000000	0.40880952	3.61930833	1.816796
85	0.53939342	8.81330300	4.75383765		85.00000000	0.40400000	3.56057441	1.838145
86	0.54953635	8.71473310	4.78906262		86.00000000	0.39930233	3.47981319	1.859608
87	0.55935478	8.59935190	4.81008859		87.00000000	0.39471264	3.39427292	1.880982
88	0.56946868	8.41943930	4.79460698		88.00000000	0.39022727	3.28549484	1.902366
89	0.57929009	8.21146490	4.75682024		89.00000000	0.38584270	3.16833376	1.923851
90	0.58941215	7.86489680	4.63566573		90.00000000	0.38155556	3.00089507	1.945226
91	0.59922391	7.48141240	4.48304119		91.00000000	0.37736264	2.82320551	1.966570
92	0.60935414	6.89221480	4.19979962		92.00000000	0.37326087	2.57259409	1.988032
93	0.61914355	6.21202520	3.84613534		93.00000000	0.36924731	2.29377361	2.009550
94	0.62924260	5.28723480	3.32695337		94.00000000	0.36531915	1.93152812	2.030945
95	0.63935798	4.13710400	2.64509046		95.00000000	0.36147368	1.49545422	2.052314
96	0.64913398	2.76423410	1.79435828		96.00000000	0.35770833	0.98878957	2.073683
97	0.65925163	1.05537510	0.69575775		97.00000000	0.35402062	0.37362455	2.095154
98	0.66896212	-0.93830019	-0.62768728		98.00000000	0.35040816	-0.32878805	2.116531
99	0.67905813	-3.34393330	-2.27072509		99.00000000	0.34686869	-1.15990575	2.137871
100	0.68877757	-6.12660070	-4.21986514		100.00000000	0.34340000	-2.10387468	2.159253
101	0.69910210	-9.47477250	-6.62383335		101.00000000	0.34000000	-3.22142265	2.180739
