# Supplementary material for: Study on the Electrical Injection Regeneration of Industrialized B-Doped Czochralski Silicon PERC Solar Cells
Source: Hindawi journal article supplement (doi:10.1155/2019/5357370), 2019-06-20
Supplement: f1 [file 5357370.f1.zip › section3.2/IVRawData_1-20-40min.csv]

13:57 02/04/2018
Test Lot:	JK-PERC
Recipe:	Recipe_YJX-LID
Cell Name:	1-20-40min
Test Order:	2
Test Condition:	Light
1	-0.29994261	9.00210950	-2.70011622		1.00000000	34.34000000	309.13244023	0.000000
2	-0.29012609	9.02226070	-2.61759322		2.00000000	17.17000000	154.91221622	0.061775
3	-0.27995825	8.99501710	-2.51822925		3.00000000	11.44666667	102.96296240	0.083205
4	-0.27014324	9.02329540	-2.43758225		4.00000000	8.58500000	77.46499101	0.104697
5	-0.25998136	9.01447580	-2.34359568		5.00000000	6.86800000	61.91141979	0.126070
6	-0.24983363	8.99929240	-2.24832589		6.00000000	5.72333333	51.50595017	0.147450
7	-0.24000147	9.01492120	-2.16359434		7.00000000	4.90571429	44.22462772	0.168814
8	-0.22985969	9.00870800	-2.07073883		8.00000000	4.29250000	38.66987909	0.190348
9	-0.22006327	9.01075270	-1.98293570		9.00000000	3.81555556	34.38102752	0.211742
10	-0.20994382	9.01328560	-1.89228361		10.00000000	3.43400000	30.95162275	0.233121
11	-0.20012283	8.99871350	-1.80084801		11.00000000	3.12181818	28.09234742	0.254457
12	-0.18997510	9.01278500	-1.71220473		12.00000000	2.86166667	25.79158641	0.275932
13	-0.18016677	9.00674250	-1.62271570		13.00000000	2.64153846	23.79165673	0.297304
14	-0.17002052	9.00195600	-1.53051724		14.00000000	2.45285714	22.08051207	0.318678
15	-0.16021219	9.02262500	-1.44553451		15.00000000	2.28933333	20.65579617	0.340154
16	-0.15009423	8.98594860	-1.34873904		16.00000000	2.14625000	19.28609218	0.361532
17	-0.13990407	9.00882820	-1.26037173		17.00000000	2.02000000	18.19783296	0.382895
18	-0.13008234	9.00053600	-1.17081078		18.00000000	1.90777778	17.17102257	0.404289
19	-0.11993907	9.01013470	-1.08066718		19.00000000	1.80736842	16.28463293	0.425778
20	-0.11012255	9.01388650	-0.99263217		20.00000000	1.71700000	15.47684312	0.447176
21	-0.09994654	9.00760840	-0.90027926		21.00000000	1.63523810	14.72958440	0.468529
22	-0.09014714	9.01330090	-0.81252328		22.00000000	1.56090909	14.06894331	0.489899
23	-0.07999494	8.99987130	-0.71994416		23.00000000	1.49304348	13.43719915	0.511380
24	-0.07016577	9.01185040	-0.63232340		24.00000000	1.43083333	12.89445595	0.532766
25	-0.06000389	9.00749970	-0.54048504		25.00000000	1.37360000	12.37270159	0.554111
26	-0.04984797	9.00586610	-0.44892416		26.00000000	1.32076923	11.89467084	0.575534
27	-0.04002624	9.01483440	-0.36082993		27.00000000	1.27185185	11.46553383	0.597001
28	-0.02989042	8.99560070	-0.26888227		28.00000000	1.22642857	11.03246172	0.618383
29	-0.02005752	9.01667500	-0.18085216		29.00000000	1.18413793	10.67698688	0.639734
30	-0.00991128	9.00697610	-0.08927065		30.00000000	1.14466667	10.30998531	0.661108
31	-0.00069168	9.00607780	-0.00622935		31.00000000	1.10774194	9.97641005	0.682707
32	0.00945287	9.00831130	0.08515436		32.00000000	1.07312500	9.66704406	0.704090
33	0.01930558	9.00846100	0.17391353		33.00000000	1.04060606	9.37425911	0.725437
34	0.02945600	9.00864510	0.26535861		34.00000000	1.01000000	9.09873155	0.746813
35	0.03925810	9.00742630	0.35361441		35.00000000	0.98114286	8.83757198	0.768288
36	0.04941373	9.00612450	0.44502617		36.00000000	0.95388889	8.59084209	0.789678
37	0.05924560	9.01471420	0.53408213		37.00000000	0.92810811	8.36662934	0.811053
38	0.06938634	9.00482940	0.62481216		38.00000000	0.90368421	8.13752215	0.832422
39	0.07951369	9.01137640	0.71652780		39.00000000	0.88051282	7.93463245	0.853892
40	0.08937905	9.00297740	0.80467757		40.00000000	0.85850000	7.72905610	0.875273
41	0.09949598	9.01199440	0.89665719		41.00000000	0.83756098	7.54809482	0.896653
42	0.10929435	8.99898530	0.98353825		42.00000000	0.81761905	7.35774179	0.918001
43	0.11943808	9.00700090	1.07577889		43.00000000	0.79860465	7.19303281	0.939478
44	0.12929749	8.99879550	1.16352167		44.00000000	0.78045455	7.02315085	0.960855
45	0.13940845	9.01012990	1.25608824		45.00000000	0.76311111	6.87573024	0.982251
46	0.14924107	8.99741840	1.34278435		46.00000000	0.74652174	6.71676843	1.003737
47	0.15937215	9.00032040	1.43440041		47.00000000	0.73063830	6.57597878	1.025107
48	0.16955754	8.99902530	1.52585259		48.00000000	0.71541667	6.43805268	1.046477
49	0.17934327	9.00651840	1.61525846		49.00000000	0.70081633	6.31191514	1.067855
50	0.18946095	9.00293730	1.70570505		50.00000000	0.68680000	6.18321734	1.089326
51	0.19928463	8.99510380	1.79258593		51.00000000	0.67333333	6.05670323	1.110709
52	0.20941198	9.01745130	1.88836233		52.00000000	0.66038462	5.95498611	1.132051
53	0.21925576	8.98558810	1.97014195		53.00000000	0.64792453	5.82198293	1.153418
54	0.22939873	9.02218910	2.06967872		54.00000000	0.63592593	5.73744396	1.174892
55	0.23922539	8.99594780	2.15205912		55.00000000	0.62436364	5.61674268	1.196271
56	0.24939069	9.01162530	2.24741545		56.00000000	0.61321429	5.52605737	1.217616
57	0.25950688	9.00759980	2.33753412		57.00000000	0.60245614	5.42668381	1.238994
58	0.26932758	8.99123380	2.42158724		58.00000000	0.59206897	5.32343049	1.260473
59	0.27950779	9.00433540	2.51678189		59.00000000	0.58203390	5.24082843	1.281860
60	0.28932923	9.00744150	2.60611611		60.00000000	0.57233333	5.15525902	1.303205
61	0.29944989	9.00757030	2.69731594		61.00000000	0.56295082	5.07081908	1.324580
62	0.30928919	9.00721450	2.78583408		62.00000000	0.55387097	4.98883461	1.346054
63	0.31942770	8.99862860	2.87441124		63.00000000	0.54507937	4.90496676	1.367425
64	0.32927001	9.01204400	2.96739582		64.00000000	0.53656250	4.83552486	1.388770
65	0.33938098	8.99011520	3.05107411		65.00000000	0.52830769	4.74954701	1.410147
66	0.34924036	9.00473120	3.14481557		66.00000000	0.52030303	4.68518893	1.431632
67	0.35936996	8.99985790	3.23427857		67.00000000	0.51253731	4.61276299	1.453017
68	0.36955088	9.00365640	3.32730915		68.00000000	0.50500000	4.54684648	1.474426
69	0.37937680	9.00674530	3.41695021		69.00000000	0.49768116	4.48248744	1.495834
70	0.38949746	8.99352360	3.50295460		70.00000000	0.49057143	4.41196572	1.517331
71	0.39932039	9.00214290	3.59473921		71.00000000	0.48366197	4.35399419	1.538725
72	0.40945369	9.00809760	3.68839880		72.00000000	0.47694444	4.29636211	1.560104
73	0.41929302	9.00537400	3.77589046		73.00000000	0.47041096	4.23622662	1.581455
74	0.42943227	8.99296280	3.86186843		74.00000000	0.46405405	4.17322085	1.602928
75	0.43926489	9.01085950	3.95815421		75.00000000	0.45786667	4.12577220	1.624304
76	0.44939297	8.98713680	4.03875610		76.00000000	0.45184211	4.06076681	1.645688
77	0.45956126	8.99700450	4.13467472		77.00000000	0.44597403	4.01243032	1.667171
78	0.46942961	8.98168750	4.21627006		78.00000000	0.44025641	3.95424550	1.688556
79	0.47955769	8.97707370	4.30502473		79.00000000	0.43468354	3.90218621	1.709913
80	0.48936203	8.97466850	4.39186200		80.00000000	0.42925000	3.85237645	1.731285
81	0.49950725	8.96278950	4.47697834		81.00000000	0.42395062	3.79978014	1.752759
82	0.50931156	8.93319800	4.54978101		82.00000000	0.41878049	3.74104902	1.774134
83	0.51943743	8.91027260	4.62832910		83.00000000	0.41373494	3.68649110	1.795493
84	0.52924401	8.86634160	4.69245818		84.00000000	0.40880952	3.62464489	1.816862
85	0.53938699	8.81360630	4.75394457		85.00000000	0.40400000	3.56069695	1.838345
86	0.54952323	8.72447970	4.79430426		86.00000000	0.39930233	3.48370503	1.859714
87	0.55934918	8.60865120	4.81524199		87.00000000	0.39471264	3.39794347	1.881069
88	0.56946611	8.44585800	4.80962990		88.00000000	0.39022727	3.29580413	1.902441
89	0.57927561	8.21975230	4.76150203		89.00000000	0.38584270	3.17153139	1.923910
90	0.58939928	7.88261800	4.64600937		90.00000000	0.38155556	3.00765669	1.945310
91	0.59919840	7.49544810	4.49126051		91.00000000	0.37736264	2.82850206	1.966657
92	0.60931754	6.93401100	4.22501452		92.00000000	0.37326087	2.58819498	1.988125
93	0.61913455	6.23202990	3.85846503		93.00000000	0.36924731	2.30116029	2.009638
94	0.62925887	5.31936500	3.34725761		94.00000000	0.36531915	1.94326589	2.031017
95	0.63936615	4.18021440	2.67268759		95.00000000	0.36147368	1.51103750	2.052362
96	0.64915633	2.82268020	1.83236072		96.00000000	0.35770833	1.00969623	2.073739
97	0.65925467	1.11009100	0.73183268		97.00000000	0.35402062	0.39299510	2.095224
98	0.66898829	-0.84907258	-0.56801961		98.00000000	0.35040816	-0.29752196	2.116595
99	0.67905909	-3.24147560	-2.20115347		99.00000000	0.34686869	-1.12436638	2.137962
100	0.68879491	-5.98936080	-4.12544123		100.00000000	0.34340000	-2.05674650	2.159325
101	0.69908530	-9.29709150	-6.49946000		101.00000000	0.34000000	-3.16101111	2.180802
13:57 02/04/2018
Test Lot:	JK-PERC
Recipe:	Recipe_YJX-LID
Cell Name:	1-20-40min
Test Order:	3
Test Condition:	Light
1	-0.29993218	8.99881550	-2.69903435		1.00000000	34.34000000	309.01932427	0.000000
2	-0.29007846	9.00122640	-2.61106189		2.00000000	17.17000000	154.55105729	0.021602
3	-0.27994636	9.01115800	-2.52264088		3.00000000	11.44666667	103.14772191	0.043015
4	-0.27017003	9.00543020	-2.43299735		4.00000000	8.58500000	77.31161827	0.064373
5	-0.25999475	9.00601480	-2.34151657		5.00000000	6.86800000	61.85330965	0.085798
6	-0.24983065	8.99543760	-2.24733602		6.00000000	5.72333333	51.48388786	0.107299
7	-0.24003795	9.00993630	-2.16272664		7.00000000	4.90571429	44.20017322	0.128674
8	-0.22986564	8.99548720	-2.06775342		8.00000000	4.29250000	38.61312881	0.150031
9	-0.22002159	9.01444530	-1.98337259		9.00000000	3.81555556	34.39511684	0.171399
10	-0.20988800	9.01134010	-1.89137215		10.00000000	3.43400000	30.94494190	0.192875
11	-0.20005362	9.00217150	-1.80091700		11.00000000	3.12181818	28.10314266	0.214265
12	-0.18994607	9.01071930	-1.71155072		12.00000000	2.86166667	25.78567506	0.235619
13	-0.18014741	8.99534030	-1.62048726		13.00000000	2.64153846	23.76153738	0.256995
14	-0.16997884	9.03079510	-1.53504408		14.00000000	2.45285714	22.15125027	0.278476
15	-0.16016530	9.00052930	-1.44157248		15.00000000	2.28933333	20.60521174	0.299848
16	-0.15002948	9.00213620	-1.35058581		16.00000000	2.14625000	19.32083482	0.321207
17	-0.13987133	9.00382710	-1.25937727		17.00000000	2.02000000	18.18773074	0.342575
18	-0.13007118	9.00520040	-1.17131704		18.00000000	1.90777778	17.17992121	0.364057
19	-0.11992642	9.00101950	-1.07946004		19.00000000	1.80736842	16.26815840	0.385430
20	-0.11006673	9.01029210	-0.99173339		20.00000000	1.71700000	15.47067154	0.406819
21	-0.09990709	9.01004510	-0.90016741		21.00000000	1.63523810	14.73356899	0.428153
22	-0.09010397	8.99738310	-0.81069993		22.00000000	1.56090909	14.04409708	0.449627
23	-0.07997038	9.00592800	-0.72020744		23.00000000	1.49304348	13.44624207	0.470984
24	-0.07012334	9.00354670	-0.63135874		24.00000000	1.43083333	12.88257474	0.492356
25	-0.06001878	9.00297550	-0.54034759		25.00000000	1.37360000	12.36648715	0.513845
26	-0.04987328	9.00393010	-0.44905551		26.00000000	1.32076923	11.89211383	0.535225
27	-0.04004857	9.00686070	-0.36071188		27.00000000	1.27185185	11.45539246	0.556573
28	-0.02990977	8.99239350	-0.26896041		28.00000000	1.22642857	11.02852831	0.577952
29	-0.02008208	9.00399880	-0.18081906		29.00000000	1.18413793	10.66197651	0.599430
30	-0.00994031	8.99797730	-0.08944265		30.00000000	1.14466667	10.29968468	0.620819
31	-0.00070508	9.00473120	-0.00634906		31.00000000	1.10774194	9.97491837	0.642292
32	0.00945733	8.98736860	0.08499652		32.00000000	1.07312500	9.64456993	0.663659
33	0.01931376	9.00597760	0.17393931		33.00000000	1.04060606	9.37167487	0.685131
34	0.02942697	9.00121690	0.26487854		34.00000000	1.01000000	9.09122907	0.706523
35	0.03927372	8.99676610	0.35333651		35.00000000	0.98114286	8.82711280	0.727888
36	0.04939363	9.01620100	0.44534291		36.00000000	0.95388889	8.60045395	0.749277
37	0.05918903	8.99964810	0.53268047		37.00000000	0.92810811	8.35264637	0.770760
38	0.06936848	9.00992490	0.62500481		38.00000000	0.90368421	8.14212687	0.792130
39	0.07950848	8.99580960	0.71524311		39.00000000	0.88051282	7.92092568	0.813487
40	0.08935524	9.00871470	0.80497585		40.00000000	0.85850000	7.73398157	0.834863
41	0.09946919	8.99271390	0.89449792		41.00000000	0.83756098	7.53194623	0.856331
42	0.10931148	9.00974270	0.98486831		42.00000000	0.81761905	7.36653725	0.877704
43	0.11946040	9.00773530	1.07606766		43.00000000	0.79860465	7.19361931	0.899056
44	0.12928930	9.00027180	1.16363884		44.00000000	0.78045455	7.02430304	0.920423
45	0.13945535	9.01066880	1.25658597		45.00000000	0.76311111	6.87614148	0.941907
46	0.14925298	8.99404910	1.34238863		46.00000000	0.74652174	6.71425318	0.963275
47	0.15939820	8.99977970	1.43454868		47.00000000	0.73063830	6.57558372	0.984626
48	0.16955680	9.01309590	1.52823170		48.00000000	0.71541667	6.44811903	1.006005
49	0.17938942	9.00229840	1.61491709		49.00000000	0.70081633	6.30895770	1.027486
50	0.18953463	8.99341960	1.70456446		50.00000000	0.68680000	6.17668058	1.048877
51	0.19932556	9.00441740	1.79481054		51.00000000	0.67333333	6.06297438	1.070257
52	0.20944175	9.00358680	1.88572698		52.00000000	0.66038462	5.94583021	1.091601
53	0.21925798	8.99421600	1.97205363		53.00000000	0.64792453	5.82757316	1.113076
54	0.22941361	9.01241780	2.06757130		54.00000000	0.63592593	5.73123013	1.134441
55	0.23923507	9.00466250	2.15423106		55.00000000	0.62436364	5.62218382	1.155828
56	0.24940930	8.99304290	2.24294853		56.00000000	0.61321429	5.51466238	1.177287
57	0.25953516	9.01545520	2.33982761		57.00000000	0.60245614	5.43141634	1.198739
58	0.26936480	8.99783710	2.42370059		58.00000000	0.59206897	5.32734010	1.220100
59	0.27949065	9.00918870	2.51798401		59.00000000	0.58203390	5.24365322	1.241493
60	0.28932625	9.01126000	2.60719406		60.00000000	0.57233333	5.15744447	1.262847
61	0.29944840	8.99995520	2.69502218		61.00000000	0.56295082	5.06653216	1.284339
62	0.30928248	9.00467780	2.78498908		62.00000000	0.55387097	4.98742961	1.305734
63	0.31941655	8.99900720	2.87443183		63.00000000	0.54507937	4.90517313	1.327094
64	0.32925287	9.01057910	2.96675903		64.00000000	0.53656250	4.83473885	1.348461
65	0.33940032	8.99721620	3.05365806		65.00000000	0.52830769	4.75329853	1.369943
66	0.34927434	9.00790410	3.14622976		66.00000000	0.52030303	4.68683980	1.391319
67	0.35939485	8.99952130	3.23438161		67.00000000	0.51253731	4.61259047	1.453001
68	0.36955330	9.00047400	3.32615487		68.00000000	0.50500000	4.54523937	1.474395
69	0.37942076	9.00051210	3.41498114		69.00000000	0.49768116	4.47938530	1.495818
70	0.38954797	9.00251960	3.50691324		70.00000000	0.49057143	4.41637890	1.517185
71	0.39934549	9.00091270	3.59447389		71.00000000	0.48366197	4.35339918	1.538662
72	0.40953445	9.00114820	3.68628028		72.00000000	0.47694444	4.29304763	1.560027
73	0.41934907	8.99398710	3.77162013		73.00000000	0.47041096	4.23087010	1.581403
74	0.42951202	8.98861790	3.86071943		74.00000000	0.46405405	4.17120458	1.602896
75	0.43932217	8.99344640	3.95102039		75.00000000	0.45786667	4.11779933	1.624264
76	0.44948509	9.00110150	4.04586092		76.00000000	0.45184211	4.06707665	1.645610
77	0.45960337	8.98464110	4.12937133		77.00000000	0.44597403	4.00691656	1.666978
78	0.46948200	8.98072810	4.21629019		78.00000000	0.44025641	3.95382311	1.688454
79	0.47962111	8.97116180	4.30275858		79.00000000	0.43468354	3.89961641	1.709841
80	0.48941639	8.97509190	4.39255708		80.00000000	0.42925000	3.85255820	1.731197
81	0.49957412	8.94186500	4.46712434		81.00000000	0.42395062	3.79090919	1.752591
82	0.50936717	8.93650910	4.55196435		82.00000000	0.41878049	3.74243564	1.774061
83	0.51952189	8.90525150	4.62647309		83.00000000	0.41373494	3.68441369	1.795438
84	0.52933055	8.86117650	4.69049143		84.00000000	0.40880952	3.62253335	1.816784
85	0.53945106	8.81509880	4.75531439		85.00000000	0.40400000	3.56129992	1.838171
86	0.54960728	8.72303200	4.79424189		86.00000000	0.39930233	3.48312696	1.859643
87	0.55941153	8.60296150	4.81259586		87.00000000	0.39471264	3.39569768	1.881010
88	0.56954318	8.44942090	4.81231005		88.00000000	0.39022727	3.29719447	1.902372
89	0.57935703	8.21142290	4.75734558		89.00000000	0.38584270	3.16831755	1.923754
90	0.58947009	7.89929440	4.65639778		90.00000000	0.38155556	3.01401966	1.945233
91	0.59927505	7.50102230	4.49517551		91.00000000	0.37736264	2.83060556	1.966626
92	0.60939783	6.93018630	4.22324049		92.00000000	0.37326087	2.58676736	1.988087
93	0.61918414	6.24707510	3.86808982		93.00000000	0.36924731	2.30671569	2.009529
94	0.62931132	5.33296680	3.35609638		94.00000000	0.36531915	1.94823489	2.031032
95	0.63943261	4.18973020	2.67905012		95.00000000	0.36147368	1.51447721	2.052417
96	0.64920408	2.84359360	1.84607257		96.00000000	0.35770833	1.01717713	2.073842
97	0.65931934	1.13397170	0.74764947		97.00000000	0.35402062	0.40144936	2.095204
98	0.66902608	-0.83494496	-0.55859995		98.00000000	0.35040816	-0.29257153	2.116683
99	0.67907661	-3.24426250	-2.20310278		99.00000000	0.34686869	-1.12533307	2.138072
100	0.68887931	-5.99826570	-4.13208114		100.00000000	0.34340000	-2.05980444	2.159449
101	0.69915390	-9.32350540	-6.51856516		101.00000000	0.34000000	-3.16999184	2.180792
13:57 02/04/2018
Test Lot:	JK-PERC
Recipe:	Recipe_YJX-LID
Cell Name:	1-20-40min
Test Order:	4
Test Condition:	Light
1	-0.29988340	8.99803920	-2.69836259		1.00000000	34.34000000	308.99266613	0.000000
2	-0.29002085	9.01240440	-2.61378518		2.00000000	17.17000000	154.74298355	0.021594
3	-0.27991048	9.00856780	-2.52159254		3.00000000	11.44666667	103.11807275	0.043005
4	-0.27007699	9.00290200	-2.43147667		4.00000000	8.58500000	77.28991367	0.064416
5	-0.25995097	8.99481300	-2.33821036		5.00000000	6.86800000	61.77637568	0.085814
6	-0.24978477	9.00892640	-2.25029261		6.00000000	5.72333333	51.56108876	0.107314
7	-0.23997508	9.00267030	-2.16041653		7.00000000	4.90571429	44.16452830	0.128686
8	-0.22981559	9.00218110	-2.06884156		8.00000000	4.29250000	38.64186237	0.150069
9	-0.21998505	9.00930690	-1.98191283		9.00000000	3.81555556	34.37551099	0.171436
10	-0.20983821	8.99295230	-1.88706501		10.00000000	3.43400000	30.88179820	0.192913
11	-0.20000395	9.01976970	-1.80398957		11.00000000	3.12181818	28.15808105	0.214298
12	-0.18988167	8.99373150	-1.70774476		12.00000000	2.86166667	25.73706164	0.235676
13	-0.18010622	9.01393510	-1.62346578		13.00000000	2.64153846	23.81065626	0.257022
14	-0.16993853	9.00170230	-1.52973606		14.00000000	2.45285714	22.07988978	0.278497
15	-0.16014299	9.00578590	-1.44221348		15.00000000	2.28933333	20.61724585	0.299874
16	-0.14994031	9.00681590	-1.35048477		16.00000000	2.14625000	19.33087863	0.321271
17	-0.13979644	9.00347810	-1.25865419		17.00000000	2.02000000	18.18702576	0.342747
18	-0.13002472	9.01389030	-1.17202856		18.00000000	1.90777778	17.19649961	0.364129
19	-0.11984660	8.99799540	-1.07837916		19.00000000	1.80736842	16.26269274	0.385481
20	-0.11000193	8.99408910	-0.98936716		20.00000000	1.71700000	15.44285098	0.406852
21	-0.09986030	9.00800700	-0.89954225		21.00000000	1.63523810	14.73023621	0.428337
22	-0.09003423	8.99530030	-0.80988495		22.00000000	1.56090909	14.04084601	0.449721
23	-0.07988961	9.00545410	-0.71944222		23.00000000	1.49304348	13.44553451	0.471072
24	-0.07006876	9.00183580	-0.63074749		24.00000000	1.43083333	12.88012672	0.492435
25	-0.05990852	9.01502990	-0.54007707		25.00000000	1.37360000	12.38304507	0.513917
26	-0.04976464	8.99781890	-0.44777325		26.00000000	1.32076923	11.88404235	0.535294
27	-0.03995272	9.01412390	-0.36013878		27.00000000	1.27185185	11.46463018	0.556648
28	-0.02981778	9.00679590	-0.26856268		28.00000000	1.22642857	11.04619183	0.578021
29	-0.01995600	9.00473790	-0.17969850		29.00000000	1.18413793	10.66285171	0.599503
30	-0.00985231	9.00593090	-0.08872926		30.00000000	1.14466667	10.30878890	0.620883
31	-0.00057628	9.01113610	-0.00519293		31.00000000	1.10774194	9.98201334	0.642349
32	0.00953984	8.99845120	0.08584383		32.00000000	1.07312500	9.65646294	0.663731
33	0.01934330	9.01126480	0.17430760		33.00000000	1.04060606	9.37717676	0.685215
34	0.02951963	8.99062250	0.26539984		34.00000000	1.01000000	9.08052873	0.706600
35	0.03934095	9.01003170	0.35446318		35.00000000	0.98114286	8.84012825	0.727945
36	0.04946741	9.00388530	0.44539889		36.00000000	0.95388889	8.58870614	0.749318
37	0.05929245	9.00052260	0.53366301		37.00000000	0.92810811	8.35345800	0.770794
38	0.06943826	8.99611000	0.62467426		38.00000000	0.90368421	8.12964256	0.792180
39	0.07958259	8.99398520	0.71576467		39.00000000	0.88051282	7.91931928	0.813564
40	0.08944336	9.00386810	0.80533618		40.00000000	0.85850000	7.72982076	0.834922
41	0.09955865	8.99618340	0.89564788		41.00000000	0.83756098	7.53485215	0.856402
42	0.10938295	9.00263020	0.98473425		42.00000000	0.81761905	7.36072193	0.877779
43	0.11953397	9.00539020	1.07645004		43.00000000	0.79860465	7.19174650	0.899161
44	0.12936944	9.00208090	1.16459416		44.00000000	0.78045455	7.02571496	0.920516
45	0.13949962	9.00124840	1.25567073		45.00000000	0.76311111	6.86895267	0.941988
46	0.14929041	9.01231100	1.34545160		46.00000000	0.74652174	6.72788608	0.963354
47	0.15948312	8.99415590	1.43441604		47.00000000	0.73063830	6.57147476	0.984745
48	0.16958429	9.00354770	1.52686024		48.00000000	0.71541667	6.44128808	1.006229
49	0.17942941	9.00425050	1.61562735		49.00000000	0.70081633	6.31032576	1.027601
50	0.18959086	8.99638180	1.70563176		50.00000000	0.68680000	6.17871502	1.048964
51	0.19938166	8.99829960	1.79409591		51.00000000	0.67333333	6.05885506	1.070346
52	0.20951110	9.00792220	1.88725969		52.00000000	0.66038462	5.94869324	1.091823
53	0.21935922	8.99323460	1.97274893		53.00000000	0.64792453	5.82693729	1.113216
54	0.22947749	9.00531010	2.06651596		54.00000000	0.63592593	5.72671016	1.134564
55	0.23933974	9.00244810	2.15464359		55.00000000	0.62436364	5.62080123	1.155935
56	0.24947663	8.98978140	2.24274037		56.00000000	0.61321429	5.51266238	1.177416
57	0.25960681	9.00876140	2.33873581		57.00000000	0.60245614	5.42738362	1.198799
58	0.26941994	8.98493000	2.42071930		58.00000000	0.59206897	5.31969821	1.220166
59	0.27958587	9.01120950	2.51940685		59.00000000	0.58203390	5.24482939	1.241536
60	0.28940606	8.99613000	2.60353454		60.00000000	0.57233333	5.14878507	1.263002
61	0.29954088	8.99698640	2.69496522		61.00000000	0.56295082	5.06486087	1.324629
62	0.30932441	9.01739790	2.78930129		62.00000000	0.55387097	4.99447490	1.346127
63	0.31950685	8.99762060	2.87480142		63.00000000	0.54507937	4.90441732	1.367511
64	0.32929930	9.00235840	2.96447032		64.00000000	0.53656250	4.83032793	1.388862
65	0.33943862	9.00554080	3.05682834		65.00000000	0.52830769	4.75769648	1.410254
66	0.34924966	8.99795060	3.14253119		66.00000000	0.52030303	4.68166096	1.431743
67	0.35941872	9.01128200	3.23882344		67.00000000	0.51253731	4.61861827	1.453108
68	0.36956918	8.99353500	3.32373336		68.00000000	0.50500000	4.54173518	1.474466
69	0.37940851	9.00655080	3.41716202		69.00000000	0.49768116	4.48239064	1.495844
70	0.38957015	9.00142380	3.50668602		70.00000000	0.49057143	4.41584133	1.517325
71	0.39938194	8.98756890	3.58947270		71.00000000	0.48366197	4.34694530	1.538706
72	0.40952644	9.00004010	3.68575438		72.00000000	0.47694444	4.29251913	1.560078
73	0.41935834	9.00120160	3.77472896		73.00000000	0.47041096	4.23426388	1.581451
74	0.42946115	8.98841480	3.86017496		74.00000000	0.46405405	4.17111033	1.602935
75	0.43929306	8.99991990	3.95360235		75.00000000	0.45786667	4.12076332	1.624308
76	0.44945469	8.98622700	4.03890187		76.00000000	0.45184211	4.06035573	1.645694
77	0.45959991	8.98259740	4.12840096		77.00000000	0.44597403	4.00600513	1.667053
78	0.46945712	8.97763920	4.21461664		78.00000000	0.44025641	3.95246321	1.688525
79	0.47958899	8.97516630	4.30439094		79.00000000	0.43468354	3.90135710	1.709912
80	0.48938516	8.96959400	4.38958619		80.00000000	0.42925000	3.85019822	1.731292
81	0.49956983	8.94965270	4.47097648		81.00000000	0.42395062	3.79421079	1.752770
82	0.50938833	8.92611220	4.54685739		82.00000000	0.41878049	3.73808162	1.774159
83	0.51950008	8.90307330	4.62514729		83.00000000	0.41373494	3.68351250	1.795515
84	0.52932006	8.86698340	4.69347219		84.00000000	0.40880952	3.62490726	1.816902
85	0.53941619	8.80816460	4.75126659		85.00000000	0.40400000	3.55849850	1.838387
86	0.54960161	8.72746090	4.79662656		86.00000000	0.39930233	3.48489543	1.859754
87	0.55940449	8.60309980	4.81261266		87.00000000	0.39471264	3.39575227	1.881110
88	0.56953561	8.44434740	4.80935655		88.00000000	0.39022727	3.29521466	1.902476
89	0.57935488	8.21984100	4.76220500		89.00000000	0.38584270	3.17156562	1.923952
90	0.58945251	7.90741440	4.66104527		90.00000000	0.38155556	3.01711789	1.945339
91	0.59927619	7.50879860	4.49984422		91.00000000	0.37736264	2.83354004	1.966684
92	0.60939240	6.92917010	4.22258360		92.00000000	0.37326087	2.58638806	1.988163
93	0.61916554	6.24905400	3.86919889		93.00000000	0.36924731	2.30744639	2.009681
94	0.62928468	5.33795120	3.35909091		94.00000000	0.36531915	1.95005579	2.031078
95	0.63942921	4.19940090	2.68521960		95.00000000	0.36147368	1.51797291	2.052422
96	0.64919484	2.84372380	1.84613082		96.00000000	0.35770833	1.01722370	2.073843
97	0.65929395	1.13929070	0.75112747		97.00000000	0.35402062	0.40333240	2.095344
98	0.66901201	-0.83092052	-0.55589581		98.00000000	0.35040816	-0.29116133	2.116785
99	0.67910808	-3.23458500	-2.19663281		99.00000000	0.34686869	-1.12197625	2.138136
100	0.68883878	-6.00490140	-4.13640895		100.00000000	0.34340000	-2.06208314	2.159511
101	0.69914556	-9.34098430	-6.53070770		101.00000000	0.34000000	-3.17593466	2.180992
