# Supplementary material for: Study on the Electrical Injection Regeneration of Industrialized B-Doped Czochralski Silicon PERC Solar Cells
Source: Hindawi journal article supplement (doi:10.1155/2019/5357370), 2019-06-20
Supplement: f1 [file 5357370.f1.zip › section3.2/IVRawData_1-20-50min.csv]

14:19 02/04/2018
Test Lot:	JK-PERC
Recipe:	Recipe_YJX-LID
Cell Name:	1-20-50min
Test Order:	2
Test Condition:	Light
1	-0.29990548	9.00538060	-2.70076299		1.00000000	34.34000000	309.24476980	0.000000
2	-0.29015550	9.01439290	-2.61557568		2.00000000	17.17000000	154.77712609	0.061753
3	-0.27999321	9.00705150	-2.52191326		3.00000000	11.44666667	103.10071617	0.083276
4	-0.27019188	9.01518250	-2.43582911		4.00000000	8.58500000	77.39534176	0.104667
5	-0.26004747	8.99313930	-2.33864312		5.00000000	6.86800000	61.76488071	0.126033
6	-0.24985911	8.99884030	-2.24844223		6.00000000	5.72333333	51.50336265	0.147406
7	-0.24003248	9.00430300	-2.16132518		7.00000000	4.90571429	44.17253786	0.168887
8	-0.22988284	9.00223830	-2.06946011		8.00000000	4.29250000	38.64210790	0.190269
9	-0.22008523	8.99944310	-1.98064450		9.00000000	3.81555556	34.33787512	0.211615
10	-0.20991921	9.00646590	-1.89063021		10.00000000	3.43400000	30.92820390	0.232988
11	-0.20012385	9.00368500	-1.80185211		11.00000000	3.12181818	28.10786754	0.254462
12	-0.18997049	9.00289250	-1.71028390		12.00000000	2.86166667	25.76327737	0.275854
13	-0.18018629	9.00797270	-1.62311318		13.00000000	2.64153846	23.79490635	0.297211
14	-0.17004706	8.99642750	-1.52981605		14.00000000	2.45285714	22.06695145	0.318592
15	-0.16021968	9.01039410	-1.44364246		15.00000000	2.28933333	20.62779556	0.340076
16	-0.15007898	8.99598030	-1.35010755		16.00000000	2.14625000	19.30762272	0.361466
17	-0.13989435	9.01054100	-1.26052378		17.00000000	2.02000000	18.20129282	0.382819
18	-0.13005805	9.00359150	-1.17098955		18.00000000	1.90777778	17.17685178	0.404184
19	-0.11990170	9.00367550	-1.07955600		19.00000000	1.80736842	16.27295877	0.425658
20	-0.11010484	9.00957970	-0.99199833		20.00000000	1.71700000	15.46944834	0.447035
21	-0.09993660	8.99976540	-0.89940593		21.00000000	1.63523810	14.71675923	0.468411
22	-0.09010922	8.99766540	-0.81077263		22.00000000	1.56090909	14.04453772	0.489757
23	-0.07997967	9.00556470	-0.72026212		23.00000000	1.49304348	13.44569964	0.511237
24	-0.07017538	9.00020410	-0.63159274		24.00000000	1.43083333	12.87779203	0.532617
25	-0.05999968	9.01105310	-0.54066032		25.00000000	1.37360000	12.37758254	0.554006
26	-0.04984409	9.00586130	-0.44888893		26.00000000	1.32076923	11.89466450	0.575474
27	-0.04003160	8.98742010	-0.35978078		27.00000000	1.27185185	11.43066690	0.596932
28	-0.02991768	9.00809290	-0.26950126		28.00000000	1.22642857	11.04778251	0.618306
29	-0.02008882	8.99846650	-0.18076857		29.00000000	1.18413793	10.65542550	0.639687
30	-0.00992280	9.01022720	-0.08940670		30.00000000	1.14466667	10.31370673	0.661043
31	-0.00064694	8.99849990	-0.00582145		31.00000000	1.10774194	9.96801570	0.682652
32	0.00948613	9.00454140	0.08541822		32.00000000	1.07312500	9.66299849	0.704042
33	0.01927824	9.00104330	0.17352426		33.00000000	1.04060606	9.36654021	0.725452
34	0.02943429	9.00452800	0.26504191		34.00000000	1.01000000	9.09457328	0.746799
35	0.03924055	8.99936490	0.35314000		35.00000000	0.98114286	8.82966259	0.768275
36	0.04940776	9.00472640	0.44490338		36.00000000	0.95388889	8.58950846	0.789658
37	0.05919690	8.99945830	0.53274001		37.00000000	0.92810811	8.35247022	0.811056
38	0.06937899	9.00629900	0.62484796		38.00000000	0.90368421	8.13885020	0.832413
39	0.07953728	8.99882030	0.71574169		39.00000000	0.88051282	7.92357664	0.853894
40	0.08935098	8.99896240	0.80406607		40.00000000	0.85850000	7.72560922	0.875261
41	0.09946387	9.01012040	0.89618140		41.00000000	0.83756098	7.54652523	0.896651
42	0.10929394	9.00377180	0.98405769		42.00000000	0.81761905	7.36165532	0.918132
43	0.11942245	8.99699780	1.07444352		43.00000000	0.79860465	7.18504429	0.939503
44	0.12928824	8.99264050	1.16264266		44.00000000	0.78045455	7.01834715	0.960867
45	0.13942644	9.00476650	1.25550254		45.00000000	0.76311111	6.87163737	0.982242
46	0.14923865	9.00287720	1.34357724		46.00000000	0.74652174	6.72084354	1.003711
47	0.15940586	8.99789430	1.43431708		47.00000000	0.73063830	6.57420618	1.025103
48	0.16954108	9.00944330	1.52747075		48.00000000	0.71541667	6.44550589	1.046451
49	0.17935179	8.99324990	1.61295547		49.00000000	0.70081633	6.30261636	1.067828
50	0.18950635	9.02124500	1.70958321		50.00000000	0.68680000	6.19579107	1.089309
51	0.19931187	8.99878220	1.79356411		51.00000000	0.67333333	6.05918001	1.110685
52	0.20945601	8.99798110	1.88468122		52.00000000	0.66038462	5.94212829	1.132043
53	0.21926226	8.99963000	1.97327921		53.00000000	0.64792453	5.83108102	1.153410
54	0.22940417	8.99749180	2.06406214		54.00000000	0.63592593	5.72173830	1.174892
55	0.23925062	9.00475500	2.15439322		55.00000000	0.62436364	5.62224158	1.196277
56	0.24939774	9.00414940	2.24561451		56.00000000	0.61321429	5.52147304	1.217622
57	0.25954708	9.00438790	2.33706259		57.00000000	0.60245614	5.42474878	1.238992
58	0.26937568	8.99607180	2.42332296		58.00000000	0.59206897	5.32629492	1.260467
59	0.27949747	9.00665090	2.51733614		59.00000000	0.58203390	5.24217613	1.281844
60	0.28931788	8.99474810	2.60234145		60.00000000	0.57233333	5.14799416	1.303195
61	0.29945904	9.00680920	2.69717044		61.00000000	0.56295082	5.07039062	1.324566
62	0.30932707	8.99837020	2.78343949		62.00000000	0.55387097	4.98393601	1.346041
63	0.31944442	8.99599360	2.87371996		63.00000000	0.54507937	4.90353048	1.367415
64	0.32924771	9.00807760	2.96588892		64.00000000	0.53656250	4.83339664	1.388784
65	0.33942905	8.99488350	3.05312476		65.00000000	0.52830769	4.75206614	1.410160
66	0.34922042	9.00723360	3.14550990		66.00000000	0.52030303	4.68649094	1.431628
67	0.35938096	8.99520400	3.23270505		67.00000000	0.51253731	4.61037769	1.453013
68	0.36953476	8.99083330	3.32242543		68.00000000	0.50500000	4.54037082	1.474381
69	0.37935591	9.01637740	3.42041605		69.00000000	0.49768116	4.48728116	1.495732
70	0.38950825	8.98786260	3.50084663		70.00000000	0.49057143	4.40918860	1.517211
71	0.39932489	9.01185130	3.59865653		71.00000000	0.48366197	4.35868977	1.538585
72	0.40945342	8.98547740	3.67913445		72.00000000	0.47694444	4.28557353	1.559977
73	0.41926637	8.99132060	3.76975835		73.00000000	0.47041096	4.22961575	1.581451
74	0.42944625	9.00480650	3.86708038		74.00000000	0.46405405	4.17871696	1.602823
75	0.43925473	8.99984170	3.95322304		75.00000000	0.45786667	4.12072752	1.624186
76	0.44942045	8.99452110	4.04232172		76.00000000	0.45184211	4.06410335	1.645555
77	0.45953780	8.99009510	4.13128852		77.00000000	0.44597403	4.00934891	1.667032
78	0.46939838	8.97545430	4.21306371		78.00000000	0.44025641	3.95150129	1.688425
79	0.47952989	8.97926620	4.30582653		79.00000000	0.43468354	3.90313926	1.709779
80	0.48936367	8.96722510	4.38823418		80.00000000	0.42925000	3.84918137	1.731162
81	0.49949962	8.97278590	4.48190315		81.00000000	0.42395062	3.80401812	1.752648
82	0.50932819	8.92845150	4.54751204		82.00000000	0.41878049	3.73906127	1.774030
83	0.51946342	8.90800480	4.62738264		83.00000000	0.41373494	3.68555283	1.795389
84	0.52924663	8.86389730	4.69118777		84.00000000	0.40880952	3.62364563	1.816768
85	0.53939372	8.79912950	4.74619519		85.00000000	0.40400000	3.55484832	1.838241
86	0.54952073	8.72231200	4.79309126		86.00000000	0.39930233	3.48283947	1.859633
87	0.55937165	8.60951520	4.81591872		87.00000000	0.39471264	3.39828451	1.880985
88	0.56948453	8.43199160	4.80188877		88.00000000	0.39022727	3.29039309	1.902365
89	0.57929152	8.21376420	4.75816395		89.00000000	0.38584270	3.16922093	1.923842
90	0.58940667	7.89136310	4.65122205		90.00000000	0.38155556	3.01099343	1.945209
91	0.59919804	7.50368500	4.49619334		91.00000000	0.37736264	2.83161036	1.966548
92	0.60929751	6.92740960	4.22085342		92.00000000	0.37326087	2.58573093	1.988019
93	0.61912310	6.23352670	3.85932037		93.00000000	0.36924731	2.30171298	2.009520
94	0.62921143	5.34370950	3.36232310		94.00000000	0.36531915	1.95215941	2.030921
95	0.63935781	4.19734950	2.68360818		95.00000000	0.36147368	1.51723139	2.052347
96	0.64913952	2.84852390	1.84908944		96.00000000	0.35770833	1.01894074	2.073724
97	0.65923601	1.14919880	0.75759323		97.00000000	0.35402062	0.40684007	2.095210
98	0.66895747	-0.80943835	-0.54147983		98.00000000	0.35040816	-0.28363381	2.116588
99	0.67904949	-3.19489770	-2.16949365		99.00000000	0.34686869	-1.10820997	2.137970
100	0.68880290	-5.92323970	-4.07994468		100.00000000	0.34340000	-2.03404051	2.159330
101	0.69908696	-9.23349570	-6.45501644		101.00000000	0.34000000	-3.13938854	2.180811
14:19 02/04/2018
Test Lot:	JK-PERC
Recipe:	Recipe_YJX-LID
Cell Name:	1-20-50min
Test Order:	3
Test Condition:	Light
1	-0.29996577	9.00896260	-2.70238040		1.00000000	34.34000000	309.36777568	0.000000
2	-0.29006472	9.00030040	-2.61066962		2.00000000	17.17000000	154.53515787	0.021585
3	-0.27997223	9.01079270	-2.52277173		3.00000000	11.44666667	103.14354044	0.043042
4	-0.27015731	8.99336340	-2.42962286		4.00000000	8.58500000	77.20802479	0.104770
5	-0.26002085	9.01388360	-2.34379768		5.00000000	6.86800000	61.90735256	0.126166
6	-0.24985090	8.97949700	-2.24353541		6.00000000	5.72333333	51.39265450	0.147518
7	-0.24003747	9.02715110	-2.16685451		7.00000000	4.90571429	44.28462411	0.168906
8	-0.22986975	9.00052070	-2.06894744		8.00000000	4.29250000	38.63473510	0.190390
9	-0.22005484	9.01055430	-1.98281608		9.00000000	3.81555556	34.38027052	0.211763
10	-0.20988190	9.01005360	-1.89104717		10.00000000	3.43400000	30.94052406	0.233122
11	-0.20010717	8.99829960	-1.80062427		11.00000000	3.12181818	28.09105530	0.254497
12	-0.18992160	9.01118850	-1.71141934		12.00000000	2.86166667	25.78701776	0.275986
13	-0.18015133	9.00444600	-1.62216292		13.00000000	2.64153846	23.78559043	0.297383
14	-0.16998214	8.99448300	-1.52890147		14.00000000	2.45285714	22.06218187	0.318740
15	-0.16017316	9.00821300	-1.44287394		15.00000000	2.28933333	20.62280229	0.340116
16	-0.15003894	9.00468160	-1.35105288		16.00000000	2.14625000	19.32629788	0.361593
17	-0.13990398	9.00621320	-1.26000507		17.00000000	2.02000000	18.19255066	0.382984
18	-0.13009128	9.00028420	-1.17085849		18.00000000	1.90777778	17.17054219	0.404340
19	-0.11991762	9.00991820	-1.08044795		19.00000000	1.80736842	16.28424163	0.425718
20	-0.11011088	9.00290780	-0.99131810		20.00000000	1.71700000	15.45799269	0.447201
21	-0.09995284	9.01119330	-0.90069435		21.00000000	1.63523810	14.73544657	0.468590
22	-0.09012080	9.00392340	-0.81144078		22.00000000	1.56090909	14.05430589	0.489941
23	-0.08001188	8.99481200	-0.71969184		23.00000000	1.49304348	13.42964539	0.511312
24	-0.07016049	9.01321130	-0.63237135		24.00000000	1.43083333	12.89640317	0.532799
25	-0.06001138	9.00684930	-0.54051348		25.00000000	1.37360000	12.37180820	0.554158
26	-0.04986823	9.00899410	-0.44926259		26.00000000	1.32076923	11.89880221	0.575516
27	-0.04001312	9.00795270	-0.36043626		27.00000000	1.27185185	11.45678132	0.596882
28	-0.02989676	9.01122190	-0.26940631		28.00000000	1.22642857	11.05162000	0.618366
29	-0.02005802	8.99716470	-0.18046528		29.00000000	1.18413793	10.65388399	0.639755
30	-0.00994464	9.01155570	-0.08961664		30.00000000	1.14466667	10.31522742	0.661133
31	-0.00070505	9.00193980	-0.00634680		31.00000000	1.10774194	9.97182622	0.682606
32	0.00947511	9.00230500	0.08529785		32.00000000	1.07312500	9.66059855	0.704081
33	0.01929348	8.99863530	0.17361495		33.00000000	1.04060606	9.36403443	0.725443
34	0.02945495	8.99912550	0.26506876		34.00000000	1.01000000	9.08911676	0.746823
35	0.03927926	9.00535580	0.35372374		35.00000000	0.98114286	8.83554052	0.768317
36	0.04941320	9.00084110	0.44476033		36.00000000	0.95388889	8.58580232	0.789693
37	0.05920775	9.00144200	0.53295508		37.00000000	0.92810811	8.35431130	0.811036
38	0.06939229	9.00118830	0.62461303		38.00000000	0.90368421	8.13423174	0.832412
39	0.07955525	9.00393010	0.71630992		39.00000000	0.88051282	7.92807589	0.853910
40	0.08936394	8.98416140	0.80286006		40.00000000	0.85850000	7.71290256	0.875302
41	0.09949266	9.00876050	0.89630556		41.00000000	0.83756098	7.54538623	0.896660
42	0.10932145	9.00038240	0.98393485		42.00000000	0.81761905	7.35888409	0.918039
43	0.11947324	9.00897410	1.07633132		43.00000000	0.79860465	7.19460862	0.939517
44	0.12929086	9.00761890	1.16460279		44.00000000	0.78045455	7.03003711	0.960897
45	0.13944712	9.00307750	1.25545323		45.00000000	0.76311111	6.87034847	0.982258
46	0.14927070	8.99566270	1.34278887		46.00000000	0.74652174	6.71545776	1.003638
47	0.15941727	9.00417040	1.43542026		47.00000000	0.73063830	6.57879173	1.025130
48	0.16955493	8.99920080	1.52585886		48.00000000	0.71541667	6.43817824	1.046510
49	0.17934278	9.01002690	1.61588327		49.00000000	0.70081633	6.31437395	1.067869
50	0.18952212	8.99678130	1.70508907		50.00000000	0.68680000	6.17898940	1.089241
51	0.19928391	8.99048420	1.79165884		51.00000000	0.67333333	6.05359269	1.110729
52	0.20941263	8.99976830	1.88466515		52.00000000	0.66038462	5.94330853	1.132112
53	0.21927342	8.99625870	1.97264041		53.00000000	0.64792453	5.82889667	1.153459
54	0.22939321	8.99813270	2.06411054		54.00000000	0.63592593	5.72214587	1.174833
55	0.23920637	8.99469660	2.15158872		55.00000000	0.62436364	5.61596148	1.196312
56	0.24936263	9.00625320	2.24582298		56.00000000	0.61321429	5.52276312	1.217692
57	0.25951368	8.99966140	2.33553525		57.00000000	0.60245614	5.42190127	1.239046
58	0.26936182	9.00586320	2.42583570		58.00000000	0.59206897	5.33209211	1.260421
59	0.27948681	8.99431610	2.51379271		59.00000000	0.58203390	5.23499686	1.281912
60	0.28933197	9.00919720	2.60664877		60.00000000	0.57233333	5.15626386	1.303300
61	0.29946592	9.00572590	2.69690799		61.00000000	0.56295082	5.06978078	1.324687
62	0.30927163	9.00532050	2.78509015		62.00000000	0.55387097	4.98778558	1.346037
63	0.31942341	9.01334760	2.87907423		63.00000000	0.54507937	4.91298979	1.367513
64	0.32927975	8.99384880	2.96149228		64.00000000	0.53656250	4.82576200	1.388897
65	0.33941218	9.01691440	3.06045057		65.00000000	0.52830769	4.76370524	1.410280
66	0.34923500	9.00268360	3.14405221		66.00000000	0.52030303	4.68412356	1.431778
67	0.35939425	8.99141410	3.23146253		67.00000000	0.51253731	4.60843523	1.453143
68	0.36954829	9.00757500	3.32873394		68.00000000	0.50500000	4.54882538	1.474494
69	0.37939492	8.98871230	3.41027178		69.00000000	0.49768116	4.47351276	1.495870
70	0.38951248	9.00681110	3.50826533		70.00000000	0.49057143	4.41848419	1.517363
71	0.39934573	8.98965840	3.58998170		71.00000000	0.48366197	4.34795591	1.538758
72	0.40948117	9.00389000	3.68692341		72.00000000	0.47694444	4.29435531	1.560115
73	0.41928986	8.99329470	3.77079728		73.00000000	0.47041096	4.23054438	1.581503
74	0.42947587	8.99639700	3.86373543		74.00000000	0.46405405	4.17481450	1.602985
75	0.43926001	8.98406790	3.94634176		75.00000000	0.45786667	4.11350522	1.624374
76	0.44940957	8.99715330	4.04340680		76.00000000	0.45184211	4.06529269	1.645721
77	0.45952863	8.99347310	4.13275837		77.00000000	0.44597403	4.01085541	1.667098
78	0.46942362	8.98823170	4.21928826		78.00000000	0.44025641	3.95712662	1.688579
79	0.47957096	8.96206000	4.29794372		79.00000000	0.43468354	3.89566001	1.709952
80	0.48937073	8.96771240	4.38853596		80.00000000	0.42925000	3.84939055	1.731306
81	0.49951658	8.94083400	4.46609482		81.00000000	0.42395062	3.79047209	1.752672
82	0.50932747	8.94193550	4.55437339		82.00000000	0.41878049	3.74470811	1.774149
83	0.51944804	8.89925290	4.62269948		83.00000000	0.41373494	3.68193186	1.795542
84	0.52924031	8.87010100	4.69441500		84.00000000	0.40880952	3.62618177	1.816889
85	0.53937799	8.80311970	4.74820901		85.00000000	0.40400000	3.55646036	1.838253
86	0.54952461	8.72959800	4.79712894		86.00000000	0.39930233	3.48574878	1.859741
87	0.55935633	8.61743160	4.82021491		87.00000000	0.39471264	3.40140921	1.881131
88	0.56948060	8.44849300	4.81125286		88.00000000	0.39022727	3.29683238	1.902494
89	0.57927662	8.23472120	4.77018146		89.00000000	0.38584270	3.17730703	1.923865
90	0.58939272	7.91064410	4.66247604		90.00000000	0.38155556	3.01835020	1.945340
91	0.59920812	7.51884940	4.50535561		91.00000000	0.37736264	2.83733284	1.966724
92	0.60933232	6.95785190	4.23964404		92.00000000	0.37326087	2.59709385	1.988210
93	0.61914772	6.27833840	3.88721891		93.00000000	0.36924731	2.31825958	2.009594
94	0.62922883	5.37394140	3.38143886		94.00000000	0.36531915	1.96320370	2.031126
95	0.63934785	4.23802660	2.70957319		95.00000000	0.36147368	1.53193509	2.052499
96	0.64914018	2.88082240	1.87005757		96.00000000	0.35770833	1.03049418	2.073889
97	0.65925330	1.16587390	0.76860622		97.00000000	0.35402062	0.41274340	2.095380
98	0.66896445	-0.81744927	-0.54684450		98.00000000	0.35040816	-0.28644090	2.116752
99	0.67904776	-3.24427320	-2.20301645		99.00000000	0.34686869	-1.12533678	2.138112
100	0.68879622	-6.03241920	-4.15510754		100.00000000	0.34340000	-2.07153275	2.159489
101	0.69907826	-9.41488460	-6.58174114		101.00000000	0.34000000	-3.20106076	2.180970
14:19 02/04/2018
Test Lot:	JK-PERC
Recipe:	Recipe_YJX-LID
Cell Name:	1-20-50min
Test Order:	4
Test Condition:	Light
1	-0.29993698	9.00289150	-2.70030009		1.00000000	34.34000000	309.15929411	0.000000
2	-0.29013935	9.00476930	-2.61263791		2.00000000	17.17000000	154.61188888	0.061787
3	-0.28001499	9.00263500	-2.52087275		3.00000000	11.44666667	103.05016197	0.083220
4	-0.27021065	9.00297160	-2.43269881		4.00000000	8.58500000	77.29051119	0.104722
5	-0.26002452	9.00470920	-2.34144519		5.00000000	6.86800000	61.84434279	0.126100
6	-0.24981827	8.99876590	-2.24805613		6.00000000	5.72333333	51.50293683	0.147459
7	-0.24006157	9.00735760	-2.16232041		7.00000000	4.90571429	44.18752285	0.168837
8	-0.22985905	9.00933550	-2.07087730		8.00000000	4.29250000	38.67257263	0.190314
9	-0.22003759	9.00736900	-1.98195977		9.00000000	3.81555556	34.36811683	0.211687
10	-0.20994672	9.00615600	-1.89081291		10.00000000	3.43400000	30.92713970	0.233070
11	-0.20009327	9.00547220	-1.80193438		11.00000000	3.12181818	28.11344685	0.254423
12	-0.18992646	8.99604420	-1.70858683		12.00000000	2.86166667	25.74367982	0.275899
13	-0.18013106	9.00599100	-1.62225871		13.00000000	2.64153846	23.78967161	0.297276
14	-0.16998288	9.00894640	-1.53136665		14.00000000	2.45285714	22.09765853	0.318666
15	-0.16017407	9.00228120	-1.44193202		15.00000000	2.28933333	20.60922243	0.340084
16	-0.15004003	9.00467110	-1.35106112		16.00000000	2.14625000	19.32627535	0.361550
17	-0.13987175	8.99583720	-1.25826349		17.00000000	2.02000000	18.17159114	0.382929
18	-0.13004658	9.00848580	-1.17152277		18.00000000	1.90777778	17.18618902	0.404323
19	-0.11991476	9.00891490	-1.08030187		19.00000000	1.80736842	16.28242830	0.425679
20	-0.11007396	9.01126770	-0.99190592		20.00000000	1.71700000	15.47234664	0.447180
21	-0.09994810	9.01280980	-0.90081322		21.00000000	1.63523810	14.73808993	0.468565
22	-0.09016609	8.99791530	-0.81130686		22.00000000	1.56090909	14.04492779	0.489942
23	-0.08002907	9.01080420	-0.72112628		23.00000000	1.49304348	13.45352244	0.511312
24	-0.07018454	8.99277500	-0.63115381		24.00000000	1.43083333	12.86716223	0.532796
25	-0.06003190	9.01155850	-0.54098093		25.00000000	1.37360000	12.37827676	0.554179
26	-0.04990380	8.99129300	-0.44869968		26.00000000	1.32076923	11.87542314	0.575590
27	-0.04002132	8.99486450	-0.35998634		27.00000000	1.27185185	11.44013507	0.596948
28	-0.02992002	9.01290320	-0.26966623		28.00000000	1.22642857	11.05368200	0.618417
29	-0.02007996	8.99860950	-0.18069173		29.00000000	1.18413793	10.65559484	0.639790
30	-0.00995336	9.00237750	-0.08960388		30.00000000	1.14466667	10.30472145	0.661172
31	-0.00068267	8.99755760	-0.00614236		31.00000000	1.10774194	9.96697187	0.682772
32	0.00942661	9.01181890	0.08495091		32.00000000	1.07312500	9.67080816	0.704161
33	0.01928127	8.98612590	0.17326396		33.00000000	1.04060606	9.35101707	0.725520
34	0.02939866	9.02004430	0.26517719		34.00000000	1.01000000	9.11024474	0.746895
35	0.03925332	8.99318410	0.35301234		35.00000000	0.98114286	8.82359834	0.768382
36	0.04938559	9.01389500	0.44515651		36.00000000	0.95388889	8.59825429	0.789769
37	0.05920453	8.99691580	0.53265817		37.00000000	0.92810811	8.35011050	0.811124
38	0.06936359	8.99557400	0.62396534		38.00000000	0.90368421	8.12915819	0.832489
39	0.07949586	9.00407700	0.71578686		39.00000000	0.88051282	7.92820524	0.853972
40	0.08931778	8.99254800	0.80319439		40.00000000	0.85850000	7.72010246	0.875344
41	0.09946344	9.00426200	0.89559487		41.00000000	0.83756098	7.54161847	0.896685
42	0.10928684	8.99461940	0.98299353		42.00000000	0.81761905	7.35417215	0.918065
43	0.11947791	8.99846270	1.07511752		43.00000000	0.79860465	7.18621417	0.939535
44	0.12928420	9.00647640	1.16439510		44.00000000	0.78045455	7.02914544	0.960920
45	0.13942242	9.00543500	1.25555954		45.00000000	0.76311111	6.87214751	0.982289
46	0.14925922	9.00491620	1.34406677		46.00000000	0.74652174	6.72236570	1.003673
47	0.15939149	9.00127790	1.43472710		47.00000000	0.73063830	6.57667836	1.025161
48	0.16955502	9.00025840	1.52603899		48.00000000	0.71541667	6.43893486	1.046544
49	0.17937024	9.00723080	1.61562915		49.00000000	0.70081633	6.31241440	1.067883
50	0.18948613	8.99192050	1.70384422		50.00000000	0.68680000	6.17565100	1.089255
51	0.19929317	8.99849890	1.79333937		51.00000000	0.67333333	6.05898926	1.110748
52	0.20943958	9.00299550	1.88558360		52.00000000	0.66038462	5.94543972	1.132121
53	0.21923544	8.99323750	1.97163638		53.00000000	0.64792453	5.82693917	1.153495
54	0.22940642	8.99795340	2.06418828		54.00000000	0.63592593	5.72203185	1.174860
55	0.23922163	8.98570540	2.14957509		55.00000000	0.62436364	5.61034770	1.196347
56	0.24935910	9.00079730	2.24443071		56.00000000	0.61321429	5.51941749	1.217735
57	0.25949064	8.99611760	2.33440831		57.00000000	0.60245614	5.41976629	1.239121
58	0.26933339	8.99438570	2.42248839		58.00000000	0.59206897	5.32529664	1.260471
59	0.27947384	9.00418660	2.51643461		59.00000000	0.58203390	5.24074183	1.281938
60	0.28931361	8.99709220	2.60298122		60.00000000	0.57233333	5.14933577	1.303323
61	0.29945260	9.00630470	2.69696136		61.00000000	0.56295082	5.07010661	1.324707
62	0.30927822	8.99641130	2.78239407		62.00000000	0.55387097	4.98285103	1.346201
63	0.31941646	9.00523660	2.87642080		63.00000000	0.54507937	4.90856865	1.367577
64	0.32923985	8.99497130	2.96150300		64.00000000	0.53656250	4.82636429	1.388920
65	0.33940339	9.01244260	3.05885357		65.00000000	0.52830769	4.76134275	1.410303
66	0.34919256	8.99871920	3.14228579		66.00000000	0.52030303	4.68206087	1.431780
67	0.35935757	8.98857590	3.23011279		67.00000000	0.51253731	4.60698054	1.453178
68	0.36953002	9.00922200	3.32917799		68.00000000	0.50500000	4.54965711	1.474531
69	0.37935865	8.99466900	3.41220549		69.00000000	0.49768116	4.47647730	1.495910
70	0.38947007	9.00077920	3.50553411		70.00000000	0.49057143	4.41552511	1.517402
71	0.39933142	8.99903960	3.59359926		71.00000000	0.48366197	4.35249324	1.538775
72	0.40947041	8.99010660	3.68118264		72.00000000	0.47694444	4.28778140	1.560125
73	0.41928861	8.98345950	3.76666225		73.00000000	0.47041096	4.22591780	1.581503
74	0.42944318	9.00450040	3.86692129		74.00000000	0.46405405	4.17857492	1.602994
75	0.43925914	8.98187730	3.94537170		75.00000000	0.45786667	4.11250222	1.624373
76	0.44941077	8.98299030	4.03705259		76.00000000	0.45184211	4.05889325	1.645730
77	0.45954603	8.98870280	4.13072269		77.00000000	0.44597403	4.00872798	1.667103
78	0.46941409	8.97563360	4.21328888		78.00000000	0.44025641	3.95158023	1.688584
79	0.47956720	8.98452090	4.30868153		79.00000000	0.43468354	3.90542339	1.709970
80	0.48937124	8.95413490	4.38189610		80.00000000	0.42925000	3.84356241	1.731329
81	0.49948490	8.96104150	4.47590492		81.00000000	0.42395062	3.79903908	1.752716
82	0.50931352	8.92358780	4.54490391		82.00000000	0.41878049	3.73702445	1.774191
83	0.51943833	8.90737630	4.62683267		83.00000000	0.41373494	3.68529280	1.795564
84	0.52924466	8.85324950	4.68553502		84.00000000	0.40880952	3.61929271	1.816938
85	0.53939772	8.81162260	4.75296914		85.00000000	0.40400000	3.55989553	1.838294
86	0.54952705	8.71842380	4.79100971		86.00000000	0.39930233	3.48128690	1.859768
87	0.55933255	8.60509590	4.81311023		87.00000000	0.39471264	3.39654015	1.881154
88	0.56946188	8.45077420	4.81239376		88.00000000	0.39022727	3.29772257	1.902541
89	0.57926887	8.23280430	4.76900724		89.00000000	0.38584270	3.17656741	1.923884
90	0.58939892	7.91100070	4.66273527		90.00000000	0.38155556	3.01848627	1.945361
91	0.59918064	7.50676440	4.49790790		91.00000000	0.37736264	2.83277241	1.966732
92	0.60931069	6.96366640	4.24303638		92.00000000	0.37326087	2.59926418	1.988214
93	0.61911029	6.26620240	3.87947039		93.00000000	0.36924731	2.31377839	2.009751
94	0.62922174	5.35241940	3.36785865		94.00000000	0.36531915	1.95534130	2.031136
95	0.63935697	4.23238330	2.70600376		95.00000000	0.36147368	1.52989518	2.052492
96	0.64911413	2.86618830	1.86048332		96.00000000	0.35770833	1.02525944	2.073866
97	0.65923971	1.16544350	0.76830663		97.00000000	0.35402062	0.41259103	2.095344
98	0.66895223	-0.80760342	-0.54024811		98.00000000	0.35040816	-0.28299083	2.116732
99	0.67903388	-3.22380040	-2.18906969		99.00000000	0.34686869	-1.11823541	2.138090
100	0.68874341	-5.99940160	-4.13204832		100.00000000	0.34340000	-2.06019451	2.159463
101	0.69907069	-9.35203840	-6.53773594		101.00000000	0.34000000	-3.17969306	2.180958
