# Supplementary material for: Study on the Electrical Injection Regeneration of Industrialized B-Doped Czochralski Silicon PERC Solar Cells
Source: Hindawi journal article supplement (doi:10.1155/2019/5357370), 2019-06-20
Supplement: f1 [file 5357370.f1.zip › section3.2/IVRawData_1-20-60min.csv]

14:35 02/04/2018
Test Lot:	JK-PERC
Recipe:	Recipe_YJX-LID
Cell Name:	1-20-60min
Test Order:	2
Test Condition:	Light
1	-0.29994050	9.00583650	-2.70121510		1.00000000	34.34000000	309.26042541	0.000000
2	-0.29015321	9.01440810	-2.61555945		2.00000000	17.17000000	154.77738708	0.061756
3	-0.28001162	9.01274390	-2.52367302		3.00000000	11.44666667	103.16587518	0.083221
4	-0.27015954	9.00792790	-2.43357766		4.00000000	8.58500000	77.33306102	0.104669
5	-0.26000980	9.00873570	-2.34235957		5.00000000	6.86800000	61.87199679	0.126026
6	-0.24988458	9.00816820	-2.25100233		6.00000000	5.72333333	51.55674933	0.147406
7	-0.24006379	9.01134400	-2.16329739		7.00000000	4.90571429	44.20707899	0.168931
8	-0.22991326	9.01044750	-2.07162136		8.00000000	4.29250000	38.67734589	0.190337
9	-0.22008577	9.00650880	-1.98220442		9.00000000	3.81555556	34.36483469	0.211705
10	-0.20997918	9.02465150	-1.89498892		10.00000000	3.43400000	30.99065325	0.233073
11	-0.20013233	9.00297450	-1.80178626		11.00000000	3.12181818	28.10564948	0.254561
12	-0.18998255	9.01887700	-1.71342925		12.00000000	2.86166667	25.80901968	0.275954
13	-0.18018259	9.02342320	-1.62586376		13.00000000	2.64153846	23.83571944	0.297299
14	-0.17004474	9.00389390	-1.53106480		14.00000000	2.45285714	22.08526547	0.318681
15	-0.16024552	9.01275060	-1.44425291		15.00000000	2.28933333	20.63319037	0.340170
16	-0.15006524	9.01384540	-1.35266487		16.00000000	2.14625000	19.34596569	0.361538
17	-0.13989687	9.02286720	-1.26227088		17.00000000	2.02000000	18.22619174	0.382874
18	-0.13009988	9.00542740	-1.17160502		18.00000000	1.90777778	17.18035427	0.404249
19	-0.11996277	9.01589300	-1.08157150		19.00000000	1.80736842	16.29504030	0.425737
20	-0.11011964	9.01244740	-0.99244746		20.00000000	1.71700000	15.47437219	0.447130
21	-0.09998030	9.00730710	-0.90055322		21.00000000	1.63523810	14.72909171	0.468499
22	-0.09012452	9.01370530	-0.81235585		22.00000000	1.56090909	14.06957455	0.489872
23	-0.08000378	9.00954150	-0.72079734		23.00000000	1.49304348	13.45163718	0.511347
24	-0.07016140	9.00968650	-0.63213217		24.00000000	1.43083333	12.89135977	0.532736
25	-0.06003544	9.01276780	-0.54108545		25.00000000	1.37360000	12.37993785	0.554087
26	-0.04985218	9.00242710	-0.44879060		26.00000000	1.32076923	11.89012872	0.575471
27	-0.04005073	9.01401040	-0.36101770		27.00000000	1.27185185	11.46448582	0.596959
28	-0.02991064	9.01416400	-0.26961939		28.00000000	1.22642857	11.05522828	0.618332
29	-0.02010398	9.01393220	-0.18121593		29.00000000	1.18413793	10.67373903	0.639717
30	-0.00996091	9.00087170	-0.08965688		30.00000000	1.14466667	10.30299781	0.661097
31	-0.00066930	9.00394060	-0.00602633		31.00000000	1.10774194	9.97404259	0.682677
32	0.00948026	9.00837140	0.08540173		32.00000000	1.07312500	9.66710856	0.704063
33	0.01928962	9.00241180	0.17365307		33.00000000	1.04060606	9.36796428	0.725445
34	0.02946961	9.00393580	0.26534249		34.00000000	1.01000000	9.09397516	0.746791
35	0.03928492	9.00920960	0.35392606		35.00000000	0.98114286	8.83932165	0.768271
36	0.04942695	9.01855660	0.44575978		36.00000000	0.95388889	8.60270093	0.789650
37	0.05925938	9.00039960	0.53335811		37.00000000	0.92810811	8.35334384	0.811031
38	0.06937090	9.03165250	0.62653389		38.00000000	0.90368421	8.16176176	0.832435
39	0.07948986	8.99028400	0.71463645		39.00000000	0.88051282	7.91606032	0.853907
40	0.08932080	9.01439090	0.80517262		40.00000000	0.85850000	7.73885459	0.875290
41	0.09948294	9.02448460	0.89778225		41.00000000	0.83756098	7.55855613	0.896649
42	0.10929378	9.01271060	0.98503321		42.00000000	0.81761905	7.36896386	0.918007
43	0.11945145	8.99951650	1.07500530		43.00000000	0.79860465	7.18705574	0.939496
44	0.12930769	9.02231980	1.16665533		44.00000000	0.78045455	7.04151050	0.960891
45	0.13941176	9.00913910	1.25597994		45.00000000	0.76311111	6.87497415	0.982247
46	0.14923377	9.01211360	1.34491169		46.00000000	0.74652174	6.72773872	1.003623
47	0.15939218	9.00330830	1.43505694		47.00000000	0.73063830	6.57816185	1.025110
48	0.16955654	9.02034760	1.52945893		48.00000000	0.71541667	6.45330701	1.046487
49	0.17935845	8.99570660	1.61345599		49.00000000	0.70081633	6.30433805	1.067879
50	0.18950571	9.00622180	1.70673046		50.00000000	0.68680000	6.18547313	1.089218
51	0.19931580	9.00306800	1.79445370		51.00000000	0.67333333	6.06206579	1.110753
52	0.20943551	9.00548270	1.88606786		52.00000000	0.66038462	5.94708223	1.132130
53	0.21925305	9.00119400	1.97353924		53.00000000	0.64792453	5.83209438	1.153515
54	0.22937946	9.01456640	2.06775637		54.00000000	0.63592593	5.73259648	1.175008
55	0.23925506	9.01157950	2.15606599		55.00000000	0.62436364	5.62650255	1.196402
56	0.24941644	9.00290970	2.24547369		56.00000000	0.61321429	5.52071284	1.217757
57	0.25954732	9.00236230	2.33653901		57.00000000	0.60245614	5.42352845	1.239135
58	0.26937303	9.01678940	2.42887988		58.00000000	0.59206897	5.33856117	1.260620
59	0.27950093	9.01001360	2.51830718		59.00000000	0.58203390	5.24413334	1.281997
60	0.28934526	8.99466990	2.60256510		60.00000000	0.57233333	5.14794941	1.303354
61	0.29946423	9.01870350	2.70077910		61.00000000	0.56295082	5.07708653	1.324727
62	0.30927137	9.00256730	2.78423632		62.00000000	0.55387097	4.98626066	1.346199
63	0.31941861	9.01241680	2.87873365		63.00000000	0.54507937	4.91248243	1.367589
64	0.32925549	9.01295950	2.96756640		64.00000000	0.53656250	4.83601608	1.388933
65	0.33940646	9.01509570	3.05978172		65.00000000	0.52830769	4.76274441	1.410299
66	0.34924707	8.99952320	3.14305711		66.00000000	0.52030303	4.68247919	1.431785
67	0.35938391	9.01951310	3.24146788		67.00000000	0.51253731	4.62283701	1.453185
68	0.36954081	9.00128560	3.32634237		68.00000000	0.50500000	4.54564923	1.474545
69	0.37937623	8.99650290	3.41305935		69.00000000	0.49768116	4.47738999	1.495919
70	0.38946766	8.99974820	3.50511087		70.00000000	0.49057143	4.41501933	1.517413
71	0.39934474	8.99635890	3.59264861		71.00000000	0.48366197	4.35119668	1.538808
72	0.40945178	9.00444510	3.68688607		72.00000000	0.47694444	4.29462007	1.560178
73	0.41929093	9.01123050	3.77832722		73.00000000	0.47041096	4.23898158	1.581556
74	0.42940542	9.00381090	3.86628520		74.00000000	0.46405405	4.17825495	1.603033
75	0.43925124	9.01208310	3.95856868		75.00000000	0.45786667	4.12633245	1.624420
76	0.44939923	9.00182820	4.04541466		76.00000000	0.45184211	4.06740501	1.645790
77	0.45954499	8.99084190	4.13169635		77.00000000	0.44597403	4.00968196	1.667168
78	0.46939155	8.99264910	4.22107350		78.00000000	0.44025641	3.95907141	1.688652
79	0.47954103	8.98261740	4.30753360		79.00000000	0.43468354	3.90459597	1.710078
80	0.48937270	8.97296330	4.39112328		80.00000000	0.42925000	3.85164450	1.731465
81	0.49950582	8.96471690	4.47792827		81.00000000	0.42395062	3.80059726	1.752819
82	0.50931519	8.93582340	4.55115059		82.00000000	0.41878049	3.74214848	1.774297
83	0.51946169	8.91285990	4.62988927		83.00000000	0.41373494	3.68756155	1.795669
84	0.52924722	8.89182850	4.70597551		84.00000000	0.40880952	3.63506417	1.817054
85	0.53937364	8.81122210	4.75254094		85.00000000	0.40400000	3.55973373	1.838546
86	0.54951936	8.74249360	4.80416949		86.00000000	0.39930233	3.49089803	1.859927
87	0.55933022	8.61207580	4.81699425		87.00000000	0.39471264	3.39929521	1.881277
88	0.56947005	8.45195200	4.81313353		88.00000000	0.39022727	3.29818218	1.902661
89	0.57928908	8.23412320	4.76993765		89.00000000	0.38584270	3.17707630	1.924146
90	0.58941990	7.92649220	4.67203224		90.00000000	0.38155556	3.02439713	1.945544
91	0.59922111	7.52878380	4.51140619		91.00000000	0.37736264	2.84108171	1.966907
92	0.60933858	6.97978640	4.25305313		92.00000000	0.37326087	2.60528114	1.988384
93	0.61913902	6.28867240	3.89356247		93.00000000	0.36924731	2.32207538	2.009921
94	0.62923789	5.39601330	3.39537602		94.00000000	0.36531915	1.97126699	2.031331
95	0.63936949	4.26398900	2.72626447		95.00000000	0.36147368	1.54131981	2.052692
96	0.64912301	2.91884020	1.89468634		96.00000000	0.35770833	1.04409346	2.074074
97	0.65926504	1.22796440	0.80955400		97.00000000	0.35402062	0.43472472	2.095556
98	0.66896647	-0.73393512	-0.49097799		98.00000000	0.35040816	-0.25717686	2.116932
99	0.67906612	-3.12329200	-2.12092178		99.00000000	0.34686869	-1.08337219	2.138288
100	0.68880254	-5.88049510	-4.05049996		100.00000000	0.34340000	-2.01936202	2.159665
101	0.69911349	-9.18868060	-6.42393056		101.00000000	0.34000000	-3.12415140	2.181140
14:35 02/04/2018
Test Lot:	JK-PERC
Recipe:	Recipe_YJX-LID
Cell Name:	1-20-60min
Test Order:	3
Test Condition:	Light
1	-0.29996654	9.01092150	-2.70297494		1.00000000	34.34000000	309.43504431	0.000000
2	-0.29012716	9.00651740	-2.61303531		2.00000000	17.17000000	154.64190376	0.021582
3	-0.27996770	9.01067830	-2.52269888		3.00000000	11.44666667	103.14223094	0.042979
4	-0.27016103	9.01243020	-2.43480743		4.00000000	8.58500000	77.37171327	0.064346
5	-0.26003510	9.01695440	-2.34472464		5.00000000	6.86800000	61.92844282	0.085726
6	-0.24987490	9.01246360	-2.25198844		6.00000000	5.72333333	51.58133334	0.107278
7	-0.24005932	9.00821780	-2.16250664		7.00000000	4.90571429	44.19174275	0.128664
8	-0.22992890	9.01839160	-2.07358886		8.00000000	4.29250000	38.71144594	0.150011
9	-0.22005898	9.00784590	-1.98225738		9.00000000	3.81555556	34.36993647	0.171400
10	-0.20990995	9.01019760	-1.89133013		10.00000000	3.43400000	30.94101856	0.192942
11	-0.20007651	9.00807290	-1.80230379		11.00000000	3.12181818	28.12156576	0.214335
12	-0.18993716	9.00719640	-1.71080130		12.00000000	2.86166667	25.77559370	0.235710
13	-0.18016623	9.01722340	-1.62459915		13.00000000	2.64153846	23.81934243	0.257094
14	-0.17004995	9.00738720	-1.53170574		14.00000000	2.45285714	22.09383403	0.278582
15	-0.16019566	9.00861840	-1.44314157		15.00000000	2.28933333	20.62373039	0.299974
16	-0.15003100	9.01369190	-1.35233321		16.00000000	2.14625000	19.34563624	0.321322
17	-0.13993929	9.00439830	-1.26006910		17.00000000	2.02000000	18.18888457	0.342692
18	-0.13011402	9.01594830	-1.17310128		18.00000000	1.90777778	17.20042581	0.364185
19	-0.11993523	9.01241210	-1.08090572		19.00000000	1.80736842	16.28874903	0.385564
20	-0.11013974	9.02838520	-0.99438400		20.00000000	1.71700000	15.50173739	0.406913
21	-0.09998030	8.99506570	-0.89932932		21.00000000	1.63523810	14.70907410	0.428301
22	-0.09015577	9.01196670	-0.81248082		22.00000000	1.56090909	14.06686075	0.449773
23	-0.08001345	9.01247880	-0.72111949		23.00000000	1.49304348	13.45602270	0.471177
24	-0.07019414	9.00623700	-0.63218506		24.00000000	1.43083333	12.88642411	0.492533
25	-0.06003172	9.01905730	-0.54142949		25.00000000	1.37360000	12.38857711	0.513909
26	-0.04989832	9.00238230	-0.44920378		26.00000000	1.32076923	11.89006955	0.535387
27	-0.04005520	9.01552960	-0.36111881		27.00000000	1.27185185	11.46641802	0.556753
28	-0.02991436	9.01134200	-0.26956852		28.00000000	1.22642857	11.05176730	0.578136
29	-0.02011068	9.00661280	-0.18112913		29.00000000	1.18413793	10.66507185	0.599494
30	-0.00996612	9.01401900	-0.08983480		30.00000000	1.14466667	10.31804708	0.620971
31	-0.00070130	9.00213340	-0.00631322		31.00000000	1.10774194	9.97204068	0.642466
32	0.00946612	9.01412770	0.08532883		32.00000000	1.07312500	9.67328579	0.663868
33	0.01925985	9.01032730	0.17353752		33.00000000	1.04060606	9.37620120	0.685338
34	0.02945770	9.01189140	0.26546962		34.00000000	1.01000000	9.10201031	0.706791
35	0.03929236	9.01145550	0.35408137		35.00000000	0.98114286	8.84152520	0.728163
36	0.04941207	9.00630380	0.44502010		36.00000000	0.95388889	8.59101312	0.749542
37	0.05920951	9.01513860	0.53378198		37.00000000	0.92810811	8.36702323	0.770904
38	0.06937016	9.00133900	0.62442431		38.00000000	0.90368421	8.13436793	0.792405
39	0.07954122	9.01433090	0.71701089		39.00000000	0.88051282	7.93723393	0.813783
40	0.08936248	9.00176140	0.80441972		40.00000000	0.85850000	7.72801216	0.835189
41	0.09950452	9.01827340	0.89735899		41.00000000	0.83756098	7.55335387	0.856566
42	0.10931610	9.00687120	0.98459603		42.00000000	0.81761905	7.36418945	0.878045
43	0.11947303	9.01216510	1.07671067		43.00000000	0.79860465	7.19715697	0.899445
44	0.12932406	9.00886060	1.16506243		44.00000000	0.78045455	7.03100620	0.920837
45	0.13943706	9.01344010	1.25680759		45.00000000	0.76311111	6.87825629	0.942193
46	0.14927396	9.00699330	1.34450956		46.00000000	0.74652174	6.72391630	0.963662
47	0.15942121	9.01454640	1.43710989		47.00000000	0.73063830	6.58637284	0.985038
48	0.16956548	9.01226520	1.52816907		48.00000000	0.71541667	6.44752473	1.006430
49	0.17937334	9.00783060	1.61576466		49.00000000	0.70081633	6.31283475	1.027933
50	0.18952134	9.01625730	1.70877317		50.00000000	0.68680000	6.19236551	1.049322
51	0.19930241	8.99481870	1.79268904		51.00000000	0.67333333	6.05651126	1.070687
52	0.20944519	9.02371690	1.88997410		52.00000000	0.66038462	5.95912381	1.092065
53	0.21924338	9.01009560	1.97540381		53.00000000	0.64792453	5.83786194	1.113542
54	0.22940031	9.00234890	2.06514163		54.00000000	0.63592593	5.72482706	1.134928
55	0.23922677	9.01123520	2.15572869		55.00000000	0.62436364	5.62628758	1.156281
56	0.24937104	9.01487350	2.24804838		56.00000000	0.61321429	5.52804921	1.177648
57	0.25952277	9.00890730	2.33801658		57.00000000	0.60245614	5.42747152	1.199154
58	0.26932541	9.01024250	2.42668726		58.00000000	0.59206897	5.33468496	1.220536
59	0.27950689	9.00861360	2.51796957		59.00000000	0.58203390	5.24331849	1.241893
60	0.28929988	9.01471140	2.60795493		60.00000000	0.57233333	5.15941982	1.263275
61	0.29944190	9.00866700	2.69757236		61.00000000	0.56295082	5.07143647	1.284749
62	0.30927804	9.00378420	2.78467273		62.00000000	0.55387097	4.98693467	1.306132
63	0.31942827	9.01409050	2.87935533		63.00000000	0.54507937	4.91339473	1.327498
64	0.32924655	9.00921250	2.96625213		64.00000000	0.53656250	4.83400558	1.348879
65	0.33937296	9.00476840	3.05597491		65.00000000	0.52830769	4.75728841	1.370355
66	0.34923592	8.99930760	3.14288147		66.00000000	0.52030303	4.68236701	1.391724
67	0.35938689	9.00834180	3.23747994		67.00000000	0.51253731	4.61711130	1.413072
68	0.36952966	8.99758240	3.32487357		68.00000000	0.50500000	4.54377911	1.434453
69	0.37939110	9.00118540	3.41496963		69.00000000	0.49768116	4.47972039	1.455944
70	0.38953018	9.00869850	3.50915995		70.00000000	0.49057143	4.41941009	1.477320
71	0.39930677	8.99343010	3.59113752		71.00000000	0.48366197	4.34978014	1.498703
72	0.40947041	9.00848010	3.68870604		72.00000000	0.47694444	4.29654454	1.520070
73	0.41930208	9.00129030	3.77425975		73.00000000	0.47041096	4.23430560	1.541545
74	0.42942104	9.00691800	3.86776009		74.00000000	0.46405405	4.17969681	1.562930
75	0.43926686	8.99245070	3.95008558		75.00000000	0.45786667	4.11734343	1.584321
76	0.44944909	9.00274560	4.04627582		76.00000000	0.45184211	4.06781953	1.605677
77	0.45956358	9.00096990	4.13651795		77.00000000	0.44597403	4.01419878	1.627150
78	0.46944663	8.97244070	4.21208205		78.00000000	0.44025641	3.95017453	1.648525
79	0.47954923	8.98920440	4.31076605		79.00000000	0.43468354	3.90745923	1.669953
80	0.48938015	8.96625900	4.38790917		80.00000000	0.42925000	3.84876668	1.691435
81	0.49951252	8.95816330	4.47471472		81.00000000	0.42395062	3.79781886	1.712814
82	0.50934494	8.92559810	4.54620823		82.00000000	0.41878049	3.73786633	1.734180
83	0.51946467	8.91290000	4.62993666		83.00000000	0.41373494	3.68757814	1.755562
84	0.52926284	8.87275700	4.69602057		84.00000000	0.40880952	3.62726756	1.777053
85	0.53939670	8.80892180	4.75150335		85.00000000	0.40400000	3.55880441	1.798443
86	0.54953724	8.72755430	4.79611610		86.00000000	0.39930233	3.48493273	1.819793
87	0.55936521	8.61524490	4.81906827		87.00000000	0.39471264	3.40054609	1.841165
88	0.56946927	8.45113560	4.81266202		88.00000000	0.39022727	3.29786360	1.862645
89	0.57927418	8.23276810	4.76902999		89.00000000	0.38584270	3.17655344	1.884039
90	0.58941174	7.91769310	4.66678127		90.00000000	0.38155556	3.02103979	1.905445
91	0.59918314	7.51734300	4.50426518		91.00000000	0.37736264	2.83676438	1.926850
92	0.60930878	6.98249860	4.25449770		92.00000000	0.37326087	2.60629350	1.948337
93	0.61912483	6.28949170	3.89398048		93.00000000	0.36924731	2.32237790	1.969723
94	0.62926888	5.39410260	3.39434090		94.00000000	0.36531915	1.97056897	1.991202
95	0.63937074	4.25724890	2.72196038		95.00000000	0.36147368	1.53888344	2.052920
96	0.64917487	2.91331510	1.89125095		96.00000000	0.35770833	1.04211709	2.074319
97	0.65931320	1.22365630	0.80677275		97.00000000	0.35402062	0.43319956	2.095716
98	0.66900349	-0.74447399	-0.49805570		98.00000000	0.35040816	-0.26086976	2.117206
99	0.67909563	-3.12676600	-2.12337313		99.00000000	0.34686869	-1.08457722	2.138586
100	0.68884766	-5.89005570	-4.05735109		100.00000000	0.34340000	-2.02264513	2.159938
101	0.69915122	-9.20417590	-6.43511081		101.00000000	0.34000000	-3.12941981	2.181375
14:36 02/04/2018
Test Lot:	JK-PERC
Recipe:	Recipe_YJX-LID
Cell Name:	1-20-60min
Test Order:	4
Test Condition:	Light
1	-0.29994345	9.01504520	-2.70400376		1.00000000	34.34000000	309.57665217	0.000000
2	-0.29015261	9.00707050	-2.61342501		2.00000000	17.17000000	154.65140049	0.061811
3	-0.28000748	9.00819400	-2.52236170		3.00000000	11.44666667	103.11379399	0.083226
4	-0.27015781	9.01035210	-2.43421699		4.00000000	8.58500000	77.35387278	0.104726
5	-0.26001716	9.01396370	-2.34378524		5.00000000	6.86800000	61.90790269	0.126106
6	-0.24989659	9.01068590	-2.25173968		6.00000000	5.72333333	51.57115897	0.147452
7	-0.24003279	9.01501460	-2.16389911		7.00000000	4.90571429	44.22508591	0.168833
8	-0.22991446	9.01233100	-2.07206522		8.00000000	4.29250000	38.68543082	0.190309
9	-0.22005811	9.01021860	-1.98277168		9.00000000	3.81555556	34.37898964	0.211668
10	-0.20990404	9.01266670	-1.89179515		10.00000000	3.43400000	30.94949745	0.233024
11	-0.20009384	9.00194930	-1.80123460		11.00000000	3.12181818	28.10244900	0.254409
12	-0.18996806	9.01041510	-1.71169108		12.00000000	2.86166667	25.78480454	0.275897
13	-0.18015786	9.00515170	-1.62234886		13.00000000	2.64153846	23.78745457	0.297290
14	-0.17001422	9.00258640	-1.53056770		14.00000000	2.45285714	22.08205836	0.318643
15	-0.16020922	9.00330920	-1.44241314		15.00000000	2.28933333	20.61157586	0.340019
16	-0.15003283	9.00683880	-1.35132151		16.00000000	2.14625000	19.33092777	0.361507
17	-0.13987580	9.00818920	-1.26002767		17.00000000	2.02000000	18.19654218	0.382888
18	-0.13005368	9.01841740	-1.17287837		18.00000000	1.90777778	17.20513631	0.404268
19	-0.11991525	9.00204090	-1.07948199		19.00000000	1.80736842	16.27000445	0.425632
20	-0.11008272	9.00901990	-0.99173742		20.00000000	1.71700000	15.46848717	0.447110
21	-0.09993759	8.99872970	-0.89931134		21.00000000	1.63523810	14.71506561	0.468511
22	-0.09013929	9.02283860	-0.81331228		22.00000000	1.56090909	14.08383080	0.489902
23	-0.07996811	9.01064210	-0.72056402		23.00000000	1.49304348	13.45328042	0.511252
24	-0.07015344	9.00761510	-0.63191517		24.00000000	1.43083333	12.88839594	0.532729
25	-0.06003138	9.00021650	-0.54029545		25.00000000	1.37360000	12.36269738	0.554110
26	-0.04981183	9.00414180	-0.44851277		26.00000000	1.32076923	11.89239344	0.575498
27	-0.04002321	9.01948070	-0.36098855		27.00000000	1.27185185	11.47144323	0.596980
28	-0.02988775	9.00324730	-0.26908684		28.00000000	1.22642857	11.04183972	0.618354
29	-0.02009541	9.00697420	-0.18099884		29.00000000	1.18413793	10.66549979	0.639711
30	-0.00991977	9.00360580	-0.08931367		30.00000000	1.14466667	10.30612744	0.661086
31	-0.00062385	9.00518320	-0.00561787		31.00000000	1.10774194	9.97541907	0.682678
32	0.00950693	9.01401710	0.08569563		32.00000000	1.07312500	9.67316710	0.704069
33	0.01930718	9.01015000	0.17396060		33.00000000	1.04060606	9.37601670	0.725414
34	0.02946095	8.99914550	0.26512339		34.00000000	1.01000000	9.08913696	0.746786
35	0.03928725	9.00238130	0.35367884		35.00000000	0.98114286	8.83262211	0.768270
36	0.04943730	8.99560550	0.44471847		36.00000000	0.95388889	8.58080814	0.789652
37	0.05924276	9.00935080	0.53373883		37.00000000	0.92810811	8.36165153	0.811006
38	0.06938835	9.01207260	0.62533280		38.00000000	0.90368421	8.14406771	0.832387
39	0.07953914	9.01443770	0.71700065		39.00000000	0.88051282	7.93732796	0.853871
40	0.08935428	9.00874330	0.80496974		40.00000000	0.85850000	7.73400612	0.875251
41	0.09948497	9.00562860	0.89592472		41.00000000	0.83756098	7.54276308	0.896613
42	0.10932021	9.01364800	0.98537389		42.00000000	0.81761905	7.36973029	0.917991
43	0.11947398	9.01693920	1.07728961		43.00000000	0.79860465	7.20096958	0.939469
44	0.12930177	9.01042370	1.16506373		44.00000000	0.78045455	7.03222613	0.960852
45	0.13942279	9.01053050	1.25627330		45.00000000	0.76311111	6.87603594	0.982201
46	0.14926323	9.01488490	1.34559084		46.00000000	0.74652174	6.72980755	1.003575
47	0.15943040	9.00269790	1.43530373		47.00000000	0.73063830	6.57771587	1.025051
48	0.16957672	8.99592780	1.52549993		48.00000000	0.71541667	6.43583668	1.046427
49	0.17940675	9.00945570	1.61635717		49.00000000	0.70081633	6.31397365	1.067813
50	0.18953820	9.00405690	1.70661274		50.00000000	0.68680000	6.18398628	1.089180
51	0.19932504	9.00597100	1.79511553		51.00000000	0.67333333	6.06402047	1.110665
52	0.20945574	9.01039510	1.88727897		52.00000000	0.66038462	5.95032630	1.132050
53	0.21925971	9.01186750	1.97593945		53.00000000	0.64792453	5.83901000	1.153440
54	0.22943060	9.01236630	2.06771261		54.00000000	0.63592593	5.73119738	1.174779
55	0.23923904	9.00154020	2.15351984		55.00000000	0.62436364	5.62023437	1.196251
56	0.24939504	9.00573060	2.24598454		56.00000000	0.61321429	5.52244266	1.217623
57	0.25955850	9.00389960	2.33703867		57.00000000	0.60245614	5.42445460	1.239007
58	0.26937810	9.01265810	2.42781271		58.00000000	0.59206897	5.33611516	1.260500
59	0.27949986	9.00891490	2.51799045		59.00000000	0.58203390	5.24349386	1.281874
60	0.28932989	9.00893690	2.60655472		60.00000000	0.57233333	5.15611489	1.303235
61	0.29947770	8.99871160	2.69491345		61.00000000	0.56295082	5.06583207	1.324613
62	0.30930325	9.00679020	2.78582948		62.00000000	0.55387097	4.98859960	1.346106
63	0.31944066	9.00092600	2.87526174		63.00000000	0.54507937	4.90621903	1.367501
64	0.32927513	9.00040720	2.96361025		64.00000000	0.53656250	4.82928099	1.388857
65	0.33941478	9.00591090	3.05673927		65.00000000	0.52830769	4.75789200	1.410236
66	0.34924850	9.00051400	3.14341601		66.00000000	0.52030303	4.68299471	1.431711
67	0.35937029	9.00403500	3.23578267		67.00000000	0.51253731	4.61490391	1.453093
68	0.36956125	9.00844760	3.32917316		68.00000000	0.50500000	4.54926604	1.474440
69	0.37933546	8.99383450	3.41168035		69.00000000	0.49768116	4.47606198	1.495820
70	0.38951081	9.00308510	3.50679897		70.00000000	0.49057143	4.41665632	1.517304
71	0.39930362	9.01274200	3.59882051		71.00000000	0.48366197	4.35912057	1.538688
72	0.40945888	8.99169540	3.68172953		72.00000000	0.47694444	4.28853917	1.560047
73	0.41928518	9.00995160	3.77773918		73.00000000	0.47041096	4.23837997	1.581422
74	0.42943671	8.99535660	3.86293634		74.00000000	0.46405405	4.17433170	1.602894
75	0.43925187	9.00024320	3.95337366		75.00000000	0.45786667	4.12091135	1.624282
76	0.44942573	8.99610810	4.04308245		76.00000000	0.45184211	4.06482042	1.645633
77	0.45953485	8.99793720	4.13486572		77.00000000	0.44597403	4.01284628	1.667006
78	0.46943036	8.98341080	4.21708577		78.00000000	0.44025641	3.95500419	1.688479
79	0.47954097	8.98804190	4.31013433		79.00000000	0.43468354	3.90695391	1.709850
80	0.48934641	8.97272010	4.39076837		80.00000000	0.42925000	3.85154010	1.731216
81	0.49952623	8.95949750	4.47550401		81.00000000	0.42395062	3.79838450	1.752588
82	0.50933099	8.94292830	4.55491052		82.00000000	0.41878049	3.74512388	1.774061
83	0.51946610	8.90778640	4.62729306		83.00000000	0.41373494	3.68546247	1.795444
84	0.52924109	8.87289430	4.69590025		84.00000000	0.40880952	3.62732369	1.816822
85	0.53940380	8.81051250	4.75242392		85.00000000	0.40400000	3.55944705	1.838168
86	0.54954934	8.72182180	4.79307141		86.00000000	0.39930233	3.48264373	1.859651
87	0.55937117	8.62965680	4.82718122		87.00000000	0.39471264	3.40623465	1.881037
88	0.56950265	8.44529340	4.80961697		88.00000000	0.39022727	3.29558381	1.902427
89	0.57931179	8.24333480	4.77546104		89.00000000	0.38584270	3.18063053	1.923906
90	0.58940232	7.90472410	4.65906272		90.00000000	0.38155556	3.01609140	1.945279
91	0.59921896	7.53958270	4.51786090		91.00000000	0.37736264	2.84515681	1.966640
92	0.60935187	6.98516320	4.25642226		92.00000000	0.37326087	2.60728809	1.988125
93	0.61914545	6.30836580	3.90579598		93.00000000	0.36924731	2.32934711	2.009640
94	0.62924266	5.40478280	3.40091991		94.00000000	0.36531915	1.97447065	2.031028
95	0.63939196	4.27109100	2.73090125		95.00000000	0.36147368	1.54388700	2.052388
96	0.64914232	2.92007090	1.89554160		96.00000000	0.35770833	1.04453369	2.073811
97	0.65925443	1.22463180	0.80734394		97.00000000	0.35402062	0.43354491	2.095325
98	0.66896164	-0.73746258	-0.49333418		98.00000000	0.35040816	-0.25841291	2.116705
99	0.67906111	-3.14065860	-2.13269912		99.00000000	0.34686869	-1.08939612	2.138116
100	0.68877500	-5.90390630	-4.06646306		100.00000000	0.34340000	-2.02740142	2.159504
101	0.69906867	-9.22115800	-6.44622266		101.00000000	0.34000000	-3.13519372	2.180977
