# Supplementary material for: Study on the Electrical Injection Regeneration of Industrialized B-Doped Czochralski Silicon PERC Solar Cells
Source: Hindawi journal article supplement (doi:10.1155/2019/5357370), 2019-06-20
Supplement: f1 [file 5357370.f1.zip › section3.2/IVRawData_1-20-after.csv]

12:29 02/04/2018
Test Lot:	JK-PERC
Recipe:	Recipe_YJX-LID
Cell Name:	1-20-after
Test Order:	2
Test Condition:	Light
1	-0.29984778	9.00026890	-2.69871065		1.00000000	34.34000000	309.06923403	0.000000
2	-0.29003865	8.99609380	-2.60921490		2.00000000	17.17000000	154.46293055	0.061785
3	-0.27989754	9.01270870	-2.52263499		3.00000000	11.44666667	103.16547225	0.083205
4	-0.27008095	9.00825500	-2.43295807		4.00000000	8.58500000	77.33586918	0.104698
5	-0.25993314	9.00473020	-2.34062780		5.00000000	6.86800000	61.84448701	0.126076
6	-0.24975410	9.00669570	-2.24945918		6.00000000	5.72333333	51.54832172	0.147436
7	-0.23993231	9.00125030	-2.15969078		7.00000000	4.90571429	44.15756219	0.168814
8	-0.22978303	9.01095200	-2.07056385		8.00000000	4.29250000	38.67951146	0.190337
9	-0.21995007	9.00134750	-1.97984701		9.00000000	3.81555556	34.34514146	0.211739
10	-0.20982459	8.99672130	-1.88773336		10.00000000	3.43400000	30.89474094	0.233096
11	-0.20000355	9.00296780	-1.80062552		11.00000000	3.12181818	28.10562857	0.254482
12	-0.18983044	9.00347520	-1.70913366		12.00000000	2.86166667	25.76494486	0.275958
13	-0.18007489	9.00140570	-1.62092714		13.00000000	2.64153846	23.77755936	0.297328
14	-0.16990626	9.02189450	-1.53287635		14.00000000	2.45285714	22.12941837	0.318692
15	-0.16009860	9.00429820	-1.44157554		15.00000000	2.28933333	20.61384001	0.340071
16	-0.14996718	9.00270560	-1.35011037		16.00000000	2.14625000	19.32205689	0.361562
17	-0.13981938	9.00847150	-1.25955890		17.00000000	2.02000000	18.19711243	0.382939
18	-0.13002513	8.98575690	-1.16837421		18.00000000	1.90777778	17.14282733	0.404282
19	-0.11985426	9.00159740	-1.07887980		19.00000000	1.80736842	16.26920288	0.425658
20	-0.11003544	8.99939350	-0.99025222		20.00000000	1.71700000	15.45195864	0.447149
21	-0.09989509	9.00468160	-0.89952348		21.00000000	1.63523810	14.72479839	0.468535
22	-0.09005246	9.00615690	-0.81102655		22.00000000	1.56090909	14.05779218	0.489916
23	-0.07992029	8.99595550	-0.71895939		23.00000000	1.49304348	13.43135269	0.511271
24	-0.07010817	9.00418950	-0.63126723		24.00000000	1.43083333	12.88349448	0.532753
25	-0.05992911	9.00915620	-0.53991075		25.00000000	1.37360000	12.37497696	0.554134
26	-0.04981928	8.99910930	-0.44832911		26.00000000	1.32076923	11.88574667	0.575521
27	-0.03997218	8.99626260	-0.35960018		27.00000000	1.27185185	11.44191325	0.596924
28	-0.02981991	9.00922110	-0.26865419		28.00000000	1.22642857	11.04916616	0.618386
29	-0.02002194	8.99245070	-0.18004629		29.00000000	1.18413793	10.64830197	0.639756
30	-0.00987414	9.01738360	-0.08903892		30.00000000	1.14466667	10.32189843	0.661118
31	-0.00062025	9.00428960	-0.00558490		31.00000000	1.10774194	9.97442919	0.682609
32	0.00951022	8.99535940	0.08554786		32.00000000	1.07312500	9.65314506	0.704109
33	0.01933025	8.99863530	0.17394583		33.00000000	1.04060606	9.36403443	0.725502
34	0.02947701	8.99646280	0.26518882		34.00000000	1.01000000	9.08642743	0.746884
35	0.03932011	9.00554940	0.35409918		35.00000000	0.98114286	8.83573047	0.768244
36	0.04944901	9.00000760	0.44504145		36.00000000	0.95388889	8.58500725	0.789721
37	0.05926903	9.00197320	0.53353825		37.00000000	0.92810811	8.35480432	0.811100
38	0.06942845	9.00303940	0.62506708		38.00000000	0.90368421	8.13590455	0.832481
39	0.07957372	9.00165080	0.71629485		39.00000000	0.88051282	7.92606894	0.853820
40	0.08939226	9.00636580	0.80509939		40.00000000	0.85850000	7.73196504	0.875299
41	0.09953009	8.99892230	0.89566357		41.00000000	0.83756098	7.53714614	0.896684
42	0.10934565	9.00090980	0.98421033		42.00000000	0.81761905	7.35931530	0.918073
43	0.11950582	9.00828840	1.07654289		43.00000000	0.79860465	7.19406102	0.939572
44	0.12935188	9.00496390	1.16480901		44.00000000	0.78045455	7.02796501	0.960945
45	0.13946888	8.99114420	1.25398481		45.00000000	0.76311111	6.86124204	0.982309
46	0.14929709	9.01174930	1.34542795		46.00000000	0.74652174	6.72746676	1.003681
47	0.15942971	9.00864030	1.43624491		47.00000000	0.73063830	6.58205761	1.025161
48	0.16958168	8.99022960	1.52457824		48.00000000	0.71541667	6.43176009	1.046555
49	0.17941585	9.00816820	1.61620815		49.00000000	0.70081633	6.31307135	1.067909
50	0.18954550	9.01185800	1.70815713		50.00000000	0.68680000	6.18934407	1.089278
51	0.19931863	9.01136210	1.79613235		51.00000000	0.67333333	6.06765048	1.110755
52	0.20947656	8.99624060	1.88450153		52.00000000	0.66038462	5.94097889	1.132131
53	0.21931519	9.00638200	1.97523638		53.00000000	0.64792453	5.83545581	1.153474
54	0.22940837	8.98624900	2.06152074		54.00000000	0.63592593	5.71458872	1.174876
55	0.23925892	9.00283240	2.15400796		55.00000000	0.62436364	5.62104117	1.196364
56	0.24940567	8.99950500	2.24452757		56.00000000	0.61321429	5.51862503	1.217735
57	0.25955838	9.00283620	2.33676158		57.00000000	0.60245614	5.42381395	1.239081
58	0.26938808	9.00571820	2.42603313		58.00000000	0.59206897	5.33200626	1.260461
59	0.27949616	9.00027280	2.51554169		59.00000000	0.58203390	5.23846386	1.281934
60	0.28936157	8.99625870	2.60317154		60.00000000	0.57233333	5.14885873	1.303313
61	0.29949272	9.00210000	2.69606341		61.00000000	0.56295082	5.06773957	1.324657
62	0.30929488	8.99922940	2.78341558		62.00000000	0.55387097	4.98441190	1.346044
63	0.31947142	9.01071170	2.87866486		63.00000000	0.54507937	4.91155301	1.367524
64	0.32927135	8.98980710	2.96008592		64.00000000	0.53656250	4.82359337	1.388898
65	0.33944342	8.99358080	3.05281182		65.00000000	0.52830769	4.75137792	1.410269
66	0.34924036	9.00255390	3.14405516		66.00000000	0.52030303	4.68405607	1.431648
67	0.35942656	8.99636270	3.23353170		67.00000000	0.51253731	4.61097157	1.453126
68	0.36956441	9.00294300	3.32716732		68.00000000	0.50500000	4.54648622	1.474505
69	0.37940824	9.01205830	3.41924918		69.00000000	0.49768116	4.48513162	1.495885
70	0.38954532	9.00006770	3.50593425		70.00000000	0.49057143	4.41517607	1.517238
71	0.39934525	8.99152760	3.59072384		71.00000000	0.48366197	4.34885997	1.538716
72	0.40950766	9.00686260	3.68837923		72.00000000	0.47694444	4.29577308	1.560102
73	0.41933364	8.98723030	3.76864800		73.00000000	0.47041096	4.22769162	1.581498
74	0.42946103	8.98737240	3.85972621		74.00000000	0.46405405	4.17062660	1.602976
75	0.43930489	9.00528430	3.95606543		75.00000000	0.45786667	4.12321950	1.624356
76	0.44946504	8.99426170	4.04260619		76.00000000	0.45184211	4.06398614	1.645717
77	0.45957533	8.98360730	4.12864429		77.00000000	0.44597403	4.00645552	1.667093
78	0.46944448	8.99023630	4.22041680		78.00000000	0.44025641	3.95800916	1.688596
79	0.47961059	8.98030280	4.30704832		79.00000000	0.43468354	3.90358985	1.709983
80	0.48939788	8.96288200	4.38641545		80.00000000	0.42925000	3.84731710	1.731332
81	0.49952158	8.96536160	4.47839159		81.00000000	0.42395062	3.80087058	1.752696
82	0.50932747	8.93186470	4.54924405		82.00000000	0.41878049	3.74049066	1.774171
83	0.51949060	8.91147140	4.62942562		83.00000000	0.41373494	3.68698708	1.795545
84	0.52927488	8.86914540	4.69421587		84.00000000	0.40880952	3.62579111	1.816911
85	0.53940380	8.81408980	4.75435353		85.00000000	0.40400000	3.56089228	1.838288
86	0.54956174	8.71807190	4.79111876		86.00000000	0.39930233	3.48114638	1.859813
87	0.55934823	8.61958120	4.82134749		87.00000000	0.39471264	3.40225768	1.881210
88	0.56950766	8.44784740	4.81111380		88.00000000	0.39022727	3.29658045	1.902571
89	0.57929271	8.21634200	4.75966702		89.00000000	0.38584270	3.17021555	1.923936
90	0.58942014	7.90049080	4.65670839		90.00000000	0.38155556	3.01447616	1.945430
91	0.59923494	7.50078060	4.49472981		91.00000000	0.37736264	2.83051435	1.966802
92	0.60934967	6.93076320	4.22325827		92.00000000	0.37326087	2.58698270	1.988270
93	0.61915708	6.24338630	3.86563683		93.00000000	0.36924731	2.30535361	2.009679
94	0.62923980	5.33749630	3.35856510		94.00000000	0.36531915	1.94988961	2.031178
95	0.63935381	4.20477820	2.68834096		95.00000000	0.36147368	1.51991667	2.052570
96	0.64915156	2.84954790	1.84978846		96.00000000	0.35770833	1.01930703	2.073949
97	0.65927672	1.16170040	0.76588203		97.00000000	0.35402062	0.41126589	2.095318
98	0.66897172	-0.79865396	-0.53427691		98.00000000	0.35040816	-0.27985487	2.116792
99	0.67904478	-3.18536520	-2.16300561		99.00000000	0.34686869	-1.10490344	2.138164
100	0.68881494	-5.93302440	-4.08675585		100.00000000	0.34340000	-2.03740058	2.159543
101	0.69909269	-9.25430390	-6.46961621		101.00000000	0.34000000	-3.14646333	2.180901
12:30 02/04/2018
Test Lot:	JK-PERC
Recipe:	Recipe_YJX-LID
Cell Name:	1-20-after
Test Order:	3
Test Condition:	Light
1	-0.29983884	8.99110700	-2.69588309		1.00000000	34.34000000	308.75461438	0.000000
2	-0.29001334	9.01099210	-2.61330792		2.00000000	17.17000000	154.71873436	0.021550
3	-0.27990872	8.99838830	-2.51872735		3.00000000	11.44666667	103.00155141	0.042935
4	-0.27010924	8.99143120	-2.42866865		4.00000000	8.58500000	77.19143685	0.064343
5	-0.25996813	9.00517080	-2.34105741		5.00000000	6.86800000	61.84751305	0.085845
6	-0.24982928	8.99393750	-2.24694893		6.00000000	5.72333333	51.47530229	0.107234
7	-0.23999037	9.00079150	-2.16010328		7.00000000	4.90571429	44.15531144	0.128591
8	-0.22982173	9.00634860	-2.06985462		8.00000000	4.29250000	38.65975137	0.149967
9	-0.21998951	8.99912930	-1.97971405		9.00000000	3.81555556	34.33667780	0.171438
10	-0.20987000	9.00453190	-1.88978111		10.00000000	3.43400000	30.92156254	0.192814
11	-0.20006607	8.99961190	-1.80051698		11.00000000	3.12181818	28.09515206	0.214159
12	-0.18989371	9.00621030	-1.71022269		12.00000000	2.86166667	25.77277181	0.235530
13	-0.18013072	8.99936680	-1.62106242		13.00000000	2.64153846	23.77217353	0.257011
14	-0.16995017	8.99168490	-1.52813838		14.00000000	2.45285714	22.05531853	0.278397
15	-0.16015145	8.98907470	-1.43961335		15.00000000	2.28933333	20.57898835	0.299747
16	-0.15002151	8.99978070	-1.35016069		16.00000000	2.14625000	19.31577933	0.321127
17	-0.13982534	9.00567440	-1.25922148		17.00000000	2.02000000	18.19146229	0.342606
18	-0.13002290	8.99445820	-1.16948554		18.00000000	1.90777778	17.15942748	0.363986
19	-0.11987584	9.00015930	-1.07890166		19.00000000	1.80736842	16.26660370	0.385337
20	-0.11003395	8.99438190	-0.98968737		20.00000000	1.71700000	15.44335372	0.406701
21	-0.09986978	8.99672320	-0.89850077		21.00000000	1.63523810	14.71178451	0.428184
22	-0.09005469	8.99501710	-0.81004349		22.00000000	1.56090909	14.04040396	0.449561
23	-0.07990615	9.00744720	-0.71975044		23.00000000	1.49304348	13.44851030	0.470919
24	-0.07010147	8.99891950	-0.63083749		24.00000000	1.43083333	12.87595398	0.492286
25	-0.05992316	8.98410610	-0.53835604		25.00000000	1.37360000	12.34056814	0.513764
26	-0.04980216	9.01061820	-0.44874823		26.00000000	1.32076923	11.90094727	0.535155
27	-0.03995803	8.98798180	-0.35914208		27.00000000	1.27185185	11.43138130	0.556507
28	-0.02981619	8.99800490	-0.26828624		28.00000000	1.22642857	11.03541030	0.577884
29	-0.02000482	8.98934840	-0.17983028		29.00000000	1.18413793	10.64462842	0.599359
30	-0.00986000	9.00453000	-0.08878465		30.00000000	1.14466667	10.30718534	0.620730
31	-0.00062992	8.98812010	-0.00566184		31.00000000	1.10774194	9.95651756	0.642237
32	0.00951320	8.99800300	0.08559979		32.00000000	1.07312500	9.65598197	0.663604
33	0.01932727	9.00485230	0.17403919		33.00000000	1.04060606	9.37050388	0.685086
34	0.02948520	9.00124070	0.26540335		34.00000000	1.01000000	9.09125311	0.706463
35	0.03926950	8.99632070	0.35328098		35.00000000	0.98114286	8.82667580	0.727849
36	0.04943263	8.99511720	0.44465232		36.00000000	0.95388889	8.58034235	0.749250
37	0.05923926	8.99719050	0.53298692		37.00000000	0.92810811	8.35036545	0.770767
38	0.06941803	8.99919130	0.62470611		38.00000000	0.90368421	8.13242709	0.792146
39	0.07954321	8.99780750	0.71571450		39.00000000	0.88051282	7.92268486	0.813499
40	0.08934760	8.99128250	0.80334952		40.00000000	0.85850000	7.71901603	0.834860
41	0.09948842	8.98965840	0.89436687		41.00000000	0.83756098	7.52938706	0.856345
42	0.10932332	9.00137420	0.98406011		42.00000000	0.81761905	7.35969500	0.877715
43	0.11949093	8.99700160	1.07506009		43.00000000	0.79860465	7.18504732	0.899087
44	0.12930872	9.00644400	1.16461175		44.00000000	0.78045455	7.02912016	0.920443
45	0.13947631	8.99168970	1.25412770		45.00000000	0.76311111	6.86165832	0.941924
46	0.14927104	9.00902560	1.34478662		46.00000000	0.74652174	6.72543346	0.963313
47	0.15943418	8.99806980	1.43459988		47.00000000	0.73063830	6.57433440	0.984684
48	0.16956680	8.99773790	1.52571762		48.00000000	0.71541667	6.43713166	1.006030
49	0.17937194	8.99709320	1.61382606		49.00000000	0.70081633	6.30530981	1.027506
50	0.18952614	8.99161430	1.70414595		50.00000000	0.68680000	6.17544070	1.048876
51	0.19930226	9.00147060	1.79401343		51.00000000	0.67333333	6.06099020	1.070262
52	0.20944530	8.98497770	1.88186135		52.00000000	0.66038462	5.93354104	1.091735
53	0.21931222	9.00675580	1.97529161		53.00000000	0.64792453	5.83569800	1.113112
54	0.22944261	8.99831010	2.06459575		54.00000000	0.63592593	5.72225868	1.134472
55	0.23927157	8.99366760	2.15192897		55.00000000	0.62436364	5.61531901	1.155842
56	0.24938929	9.00115200	2.24479091		56.00000000	0.61321429	5.51963499	1.177320
57	0.25953457	8.99281600	2.33394663		57.00000000	0.60245614	5.41777722	1.198702
58	0.26937693	8.99961660	2.42428909		58.00000000	0.59206897	5.32839369	1.220052
59	0.27951699	8.98560520	2.51162932		59.00000000	0.58203390	5.22992682	1.241421
60	0.28934595	8.99437140	2.60248494		60.00000000	0.57233333	5.14777856	1.262902
61	0.29948750	9.00742720	2.69761185		61.00000000	0.56295082	5.07073853	1.284286
62	0.30934250	8.98634240	2.77985762		62.00000000	0.55387097	4.97727416	1.305623
63	0.31946471	9.01204110	2.87902910		63.00000000	0.54507937	4.91227764	1.327009
64	0.32930854	8.99709990	2.96282183		64.00000000	0.53656250	4.82750642	1.348492
65	0.33945307	8.99827480	3.05449201		65.00000000	0.52830769	4.75385779	1.369932
66	0.34926641	8.98097040	3.13675129		66.00000000	0.52030303	4.67282611	1.391299
67	0.35939381	9.00424960	3.23607157		67.00000000	0.51253731	4.61501390	1.412673
68	0.36956811	8.97953030	3.31854804		68.00000000	0.50500000	4.53466280	1.434160
69	0.37937400	8.98702530	3.40944374		69.00000000	0.49768116	4.47267317	1.455535
70	0.38952225	9.01500700	3.51154581		70.00000000	0.49057143	4.42250486	1.476887
71	0.39931995	8.98671150	3.58857319		71.00000000	0.48366197	4.34653060	1.498266
72	0.40946671	8.99199870	3.68192412		72.00000000	0.47694444	4.28868382	1.519739
73	0.41929939	8.98520280	3.76749005		73.00000000	0.47041096	4.22673787	1.541112
74	0.42946923	8.99026580	3.86104253		74.00000000	0.46405405	4.17196929	1.562489
75	0.43929297	8.99134250	3.94983355		75.00000000	0.45786667	4.11683602	1.583842
76	0.44944569	8.98993590	4.04048794		76.00000000	0.45184211	4.06203156	1.605321
77	0.45957163	8.96843240	4.12163710		77.00000000	0.44597403	3.99968790	1.626695
78	0.46941397	8.99349210	4.22167083		78.00000000	0.44025641	3.95944255	1.648075
79	0.47956148	8.95756820	4.29570466		79.00000000	0.43468354	3.89370749	1.669418
80	0.48938745	8.96268180	4.38622399		80.00000000	0.42925000	3.84723116	1.690933
81	0.49948287	8.94744680	4.46909641		81.00000000	0.42395062	3.79327559	1.712320
82	0.50933266	8.93166450	4.54918844		82.00000000	0.41878049	3.74040682	1.733712
83	0.51949060	8.89146140	4.61903062		83.00000000	0.41373494	3.67870825	1.755189
84	0.52923918	8.86133670	4.68976657		84.00000000	0.40880952	3.62259884	1.776587
85	0.53942537	8.79986760	4.74687184		85.00000000	0.40400000	3.55514651	1.797953
86	0.54955727	8.71342280	4.78852485		86.00000000	0.39930233	3.47928999	1.819324
87	0.55938101	8.60251050	4.81208101		87.00000000	0.39471264	3.39551966	1.840809
88	0.56951064	8.42264650	4.79678680		88.00000000	0.39022727	3.28674637	1.862199
89	0.57928079	8.18735220	4.74277585		89.00000000	0.38584270	3.15903005	1.883559
90	0.58943725	7.88451670	4.64742784		90.00000000	0.38155556	3.00838115	1.904936
91	0.59923565	7.45869210	4.46951421		91.00000000	0.37736264	2.81463172	1.926420
92	0.60933852	6.91022970	4.21066914		92.00000000	0.37326087	2.57931835	1.947794
93	0.61915708	6.19457530	3.83541515		93.00000000	0.36924731	2.28733028	1.969142
94	0.62927181	5.29000470	3.32885083		94.00000000	0.36531915	1.93254001	1.990609
95	0.63938361	4.15556430	2.65699970		95.00000000	0.36147368	1.50212714	2.012119
96	0.64919621	2.81287380	1.82610701		96.00000000	0.35770833	1.00618840	2.033562
97	0.65927446	1.11867950	0.73751682		97.00000000	0.35402062	0.39603561	2.054923
98	0.66897839	-0.82772523	-0.55373029		98.00000000	0.35040816	-0.29004168	2.076300
99	0.67906487	-3.19616460	-2.17040310		99.00000000	0.34686869	-1.10864942	2.097791
100	0.68880004	-5.92640210	-4.08210600		100.00000000	0.34340000	-2.03512648	2.119171
101	0.69910091	-9.19312570	-6.42692254		101.00000000	0.34000000	-3.12566274	2.140528
12:30 02/04/2018
Test Lot:	JK-PERC
Recipe:	Recipe_YJX-LID
Cell Name:	1-20-after
Test Order:	4
Test Condition:	Light
1	-0.29985315	8.99058060	-2.69585391		1.00000000	34.34000000	308.73653780	0.000000
2	-0.29004976	8.98579310	-2.60632713		2.00000000	17.17000000	154.28606753	0.061780
3	-0.27991366	9.00024510	-2.51929155		3.00000000	11.44666667	103.02280558	0.083208
4	-0.27009243	8.99611470	-2.42978248		4.00000000	8.58500000	77.23164470	0.104715
5	-0.25996080	9.01055530	-2.34239116		5.00000000	6.86800000	61.88449380	0.126099
6	-0.24976590	8.98687930	-2.24461600		6.00000000	5.72333333	51.43490586	0.147442
7	-0.23995583	9.00746730	-2.16139429		7.00000000	4.90571429	44.18806101	0.168817
8	-0.22982495	8.99462800	-2.06718993		8.00000000	4.29250000	38.60944069	0.190295
9	-0.21997392	8.99493310	-1.97865069		9.00000000	3.81555556	34.32066696	0.211681
10	-0.20987579	8.99661830	-1.88817237		10.00000000	3.43400000	30.89438724	0.233026
11	-0.20003742	8.98989300	-1.79831500		11.00000000	3.12181818	28.06481142	0.254411
12	-0.18990132	8.98544880	-1.70634859		12.00000000	2.86166667	25.71335932	0.275883
13	-0.18011059	9.00098900	-1.62117344		13.00000000	2.64153846	23.77645864	0.297260
14	-0.16996258	8.99506950	-1.52882522		14.00000000	2.45285714	22.06362047	0.318597
15	-0.16016069	8.98254680	-1.43865089		15.00000000	2.28933333	20.56404381	0.339968
16	-0.15000674	8.99641800	-1.34952334		16.00000000	2.14625000	19.30856213	0.361451
17	-0.13984236	8.99193100	-1.25745285		17.00000000	2.02000000	18.16370062	0.382828
18	-0.13002931	9.00104430	-1.17039958		18.00000000	1.90777778	17.17199229	0.404231
19	-0.11988278	8.99932380	-1.07886396		19.00000000	1.80736842	16.26509365	0.425600
20	-0.11005707	8.99061780	-0.98948105		20.00000000	1.71700000	15.43689076	0.447065
21	-0.09989864	8.99709610	-0.89879770		21.00000000	1.63523810	14.71239429	0.468444
22	-0.09007591	9.00311180	-0.81096349		22.00000000	1.56090909	14.05303906	0.489834
23	-0.07992716	9.00832370	-0.72000974		23.00000000	1.49304348	13.44981895	0.511194
24	-0.07010368	8.99031730	-0.63025435		24.00000000	1.43083333	12.86364567	0.532678
25	-0.05996387	9.00574870	-0.54001952		25.00000000	1.37360000	12.37029641	0.554052
26	-0.04980470	8.98271850	-0.44738159		26.00000000	1.32076923	11.86409820	0.575432
27	-0.03996484	8.99688720	-0.35955919		27.00000000	1.27185185	11.44270765	0.596910
28	-0.02982652	8.99693580	-0.26834725		28.00000000	1.22642857	11.03409912	0.618363
29	-0.02000750	8.99341960	-0.17993586		29.00000000	1.18413793	10.64944928	0.639746
30	-0.00984089	9.00148300	-0.08858262		30.00000000	1.14466667	10.30369754	0.661128
31	-0.00061286	8.99363140	-0.00551186		31.00000000	1.10774194	9.96262265	0.682584
32	0.00951483	9.00090410	0.08564211		32.00000000	1.07312500	9.65909521	0.704086
33	0.01935962	8.99480630	0.17413603		33.00000000	1.04060606	9.36004995	0.725462
34	0.02949840	8.99488260	0.26533466		34.00000000	1.01000000	9.08483143	0.746841
35	0.03930746	8.98800750	0.35329575		35.00000000	0.98114286	8.81851936	0.768215
36	0.04944252	8.98689940	0.44433497		36.00000000	0.95388889	8.57250348	0.789690
37	0.05927317	9.00083540	0.53350800		37.00000000	0.92810811	8.35374831	0.811088
38	0.06942907	8.99314880	0.62438596		38.00000000	0.90368421	8.12696657	0.832467
39	0.07959539	8.99500270	0.71596072		39.00000000	0.88051282	7.92021520	0.853812
40	0.08939775	8.99309730	0.80396267		40.00000000	0.85850000	7.72057403	0.875292
41	0.09952685	8.99520020	0.89526396		41.00000000	0.83756098	7.53402866	0.896669
42	0.10935601	8.98888680	0.98298879		42.00000000	0.81761905	7.34948506	0.918058
43	0.11950000	8.98616980	1.07384729		43.00000000	0.79860465	7.17639700	0.939534
44	0.12929417	8.99214270	1.16263163		44.00000000	0.78045455	7.01795864	0.960903
45	0.13946272	8.98980330	1.25374242		45.00000000	0.76311111	6.86021878	0.982245
46	0.14925244	8.99708750	1.34283726		46.00000000	0.74652174	6.71652141	1.003632
47	0.15942322	8.99174020	1.43349218		47.00000000	0.73063830	6.56970975	1.025111
48	0.16959475	8.98386860	1.52361695		48.00000000	0.71541667	6.42720933	1.046491
49	0.17940456	8.99348930	1.61347299		49.00000000	0.70081633	6.30278413	1.067856
50	0.18953590	8.99354930	1.70460046		50.00000000	0.68680000	6.17676966	1.089234
51	0.19933082	8.98366640	1.79072159		51.00000000	0.67333333	6.04900204	1.110716
52	0.20944132	9.00363250	1.88573268		52.00000000	0.66038462	5.94586039	1.132096
53	0.21926823	8.98068140	1.96917811		53.00000000	0.64792453	5.81880376	1.153441
54	0.22943977	9.00202080	2.06542158		54.00000000	0.63592593	5.72461841	1.174822
55	0.23925181	8.98427580	2.14950425		55.00000000	0.62436364	5.60945511	1.196316
56	0.24941589	8.99498270	2.24349162		56.00000000	0.61321429	5.51585189	1.217686
57	0.25955170	8.99390510	2.33438336		57.00000000	0.60245614	5.41843335	1.239056
58	0.26938456	8.99449730	2.42297870		58.00000000	0.59206897	5.32536271	1.260444
59	0.27955833	8.98630710	2.51219701		59.00000000	0.58203390	5.23033535	1.281915
60	0.28938302	8.97820660	2.59814054		60.00000000	0.57233333	5.13852691	1.303320
61	0.29949278	8.99863150	2.69502516		61.00000000	0.56295082	5.06578698	1.324659
62	0.30933681	8.98241710	2.77859225		62.00000000	0.55387097	4.97510005	1.346032
63	0.31950241	8.99919320	2.87526392		63.00000000	0.54507937	4.90527452	1.367511
64	0.32928914	8.98658560	2.95918504		64.00000000	0.53656250	4.82186484	1.388880
65	0.33945173	8.98924060	3.05141327		65.00000000	0.52830769	4.74908496	1.410252
66	0.34926227	8.98689560	3.13878356		66.00000000	0.52030303	4.67590901	1.431608
67	0.35942265	8.99519160	3.23307560		67.00000000	0.51253731	4.61037134	1.453086
68	0.36959493	8.98781390	3.32185045		68.00000000	0.50500000	4.53884602	1.474466
69	0.37940770	8.99628640	3.41326033		69.00000000	0.49768116	4.47728225	1.495856
70	0.38954425	8.98618030	3.50051487		70.00000000	0.49057143	4.40836331	1.517201
71	0.39937639	8.99229810	3.59131155		71.00000000	0.48366197	4.34923263	1.538677
72	0.40952557	8.98602960	3.68000889		72.00000000	0.47694444	4.28583690	1.560053
73	0.41935772	8.99205400	3.77088726		73.00000000	0.47041096	4.22996074	1.581434
74	0.42950693	8.98463440	3.85896274		74.00000000	0.46405405	4.16935602	1.602927
75	0.43927133	8.99054240	3.94928752		75.00000000	0.45786667	4.11646968	1.624305
76	0.44946072	8.98198130	4.03704778		76.00000000	0.45184211	4.05843734	1.645654
77	0.45957792	8.97970010	4.12687189		77.00000000	0.44597403	4.00471301	1.667031
78	0.46946365	8.97749230	4.21460630		78.00000000	0.44025641	3.95239853	1.688505
79	0.47959423	8.97287750	4.30334028		79.00000000	0.43468354	3.90036219	1.709901
80	0.48939437	8.95950220	4.38472993		80.00000000	0.42925000	3.84586632	1.731249
81	0.49954057	8.94127660	4.46653041		81.00000000	0.42395062	3.79065973	1.752634
82	0.50933403	8.93510720	4.55095416		82.00000000	0.41878049	3.74184855	1.774113
83	0.51949733	8.89623640	4.62157106		83.00000000	0.41373494	3.68068383	1.795482
84	0.52928555	8.85130980	4.68487038		84.00000000	0.40880952	3.61849974	1.816830
85	0.53943032	8.79804610	4.74593282		85.00000000	0.40400000	3.55441062	1.838215
86	0.54955870	8.71004490	4.78668095		86.00000000	0.39930233	3.47794118	1.859693
87	0.55938858	8.58873560	4.80444061		87.00000000	0.39471264	3.39008253	1.881079
88	0.56948495	8.42275330	4.79663124		88.00000000	0.39022727	3.28678805	1.902436
89	0.57930219	8.18881990	4.74380130		89.00000000	0.38584270	3.15959635	1.923809
90	0.58940822	7.87656120	4.64250992		90.00000000	0.38155556	3.00534568	1.945290
91	0.59924108	7.45244650	4.46581209		91.00000000	0.37736264	2.81227487	1.966669
92	0.60936123	6.91083620	4.21119565		92.00000000	0.37326087	2.57954473	1.988152
93	0.61914653	6.18739460	3.83090390		93.00000000	0.36924731	2.28467882	2.009597
94	0.62927336	5.28507420	3.32575640		94.00000000	0.36531915	1.93073881	2.031094
95	0.63939875	4.15247730	2.65508880		95.00000000	0.36147368	1.50101127	2.052464
96	0.64915574	2.79250960	1.81277364		96.00000000	0.35770833	0.99890395	2.073839
97	0.65930569	1.10160090	0.72629174		97.00000000	0.35402062	0.38998943	2.095204
98	0.66901201	-0.85800803	-0.57401768		98.00000000	0.35040816	-0.30065302	2.116676
99	0.67910391	-3.21935180	-2.18627440		99.00000000	0.34686869	-1.11669233	2.138067
100	0.68884820	-5.96672580	-4.11016833		100.00000000	0.34340000	-2.04897364	2.159447
101	0.69910532	-9.26140210	-6.47469548		101.00000000	0.34000000	-3.14887671	2.180798
