# Supplementary material for: Study on the Electrical Injection Regeneration of Industrialized B-Doped Czochralski Silicon PERC Solar Cells
Source: Hindawi journal article supplement (doi:10.1155/2019/5357370), 2019-06-20
Supplement: f1 [file 5357370.f1.zip › section3.2/IVRawData_1-20.csv]

11:19 02/04/2018
Test Lot:	JK-PERC
Recipe:	Recipe_YJX-LID
Cell Name:	1-20
Test Order:	2
Test Condition:	Light
1	-0.29986838	9.03594110	-2.70959302		1.00000000	34.34000000	310.29421737	0.000000
2	-0.29004502	9.03204250	-2.61969895		2.00000000	17.17000000	155.08016973	0.061783
3	-0.27991503	9.01666260	-2.52389938		3.00000000	11.44666667	103.21073123	0.083228
4	-0.27006191	9.03501320	-2.44001292		4.00000000	8.58500000	77.56558832	0.104609
5	-0.25989991	9.02795030	-2.34636347		5.00000000	6.86800000	62.00396266	0.126144
6	-0.24974832	9.00983140	-2.25019026		6.00000000	5.72333333	51.56626838	0.147546
7	-0.23993912	9.04856400	-2.17110448		7.00000000	4.90571429	44.38966968	0.168938
8	-0.22978233	9.02047060	-2.07274475		8.00000000	4.29250000	38.72037005	0.190292
9	-0.21996270	9.02701090	-1.98560569		9.00000000	3.81555556	34.44306159	0.211764
10	-0.20979622	9.02826880	-1.89409667		10.00000000	3.43400000	31.00307506	0.233147
11	-0.19998106	9.01754000	-1.80333721		11.00000000	3.12181818	28.15112033	0.254528
12	-0.18986893	9.02667050	-1.71388427		12.00000000	2.86166667	25.83132208	0.276020
13	-0.18006419	9.02580260	-1.62522383		13.00000000	2.64153846	23.84200471	0.297388
14	-0.16992600	9.02935890	-1.53432284		14.00000000	2.45285714	22.14772747	0.318728
15	-0.16009074	9.02554420	-1.44490605		15.00000000	2.28933333	20.66247919	0.340111
16	-0.14994809	9.02778820	-1.35369960		16.00000000	2.14625000	19.37589042	0.361584
17	-0.13979726	9.03011320	-1.26238508		17.00000000	2.02000000	18.24082866	0.382969
18	-0.12996720	9.03235630	-1.17391006		18.00000000	1.90777778	17.23172863	0.404324
19	-0.11985730	9.03806690	-1.08327830		19.00000000	1.80736842	16.33511670	0.425701
20	-0.11003246	9.01885700	-0.99236702		20.00000000	1.71700000	15.48537747	0.447182
21	-0.09987269	9.04636760	-0.90348509		21.00000000	1.63523810	14.79296492	0.468564
22	-0.09006646	9.01043220	-0.81153776		22.00000000	1.56090909	14.06446553	0.489913
23	-0.07990222	9.04259300	-0.72252329		23.00000000	1.49304348	13.50098451	0.511293
24	-0.07011386	9.02222920	-0.63258332		24.00000000	1.43083333	12.90930628	0.532774
25	-0.05993027	9.04623410	-0.54214324		25.00000000	1.37360000	12.42590716	0.554140
26	-0.04979506	9.01606460	-0.44895546		26.00000000	1.32076923	11.90814071	0.575502
27	-0.03995013	9.03356740	-0.36089215		27.00000000	1.27185185	11.48935943	0.596880
28	-0.02981938	9.03453250	-0.26940416		28.00000000	1.22642857	11.08020879	0.618359
29	-0.02000720	9.02618500	-0.18058868		29.00000000	1.18413793	10.68824803	0.639740
30	-0.00987199	9.03680320	-0.08921121		30.00000000	1.14466667	10.34412740	0.661101
31	-0.00065599	9.02530380	-0.00592055		31.00000000	1.10774194	9.99770750	0.682594
32	0.00948273	9.03076550	0.08563632		32.00000000	1.07312500	9.69114023	0.704088
33	0.01933259	9.03526500	0.17467508		33.00000000	1.04060606	9.40215152	0.725486
34	0.02945933	9.02748780	0.26594372		34.00000000	1.01000000	9.11776268	0.746892
35	0.03929802	9.02858920	0.35480572		35.00000000	0.98114286	8.85833580	0.768256
36	0.04945007	9.02123360	0.44610060		36.00000000	0.95388889	8.60525450	0.789730
37	0.05927462	9.03128150	0.53532579		37.00000000	0.92810811	8.38200559	0.811163
38	0.06943187	9.02643010	0.62672193		38.00000000	0.90368421	8.15704236	0.832554
39	0.07957275	9.02823730	0.71840162		39.00000000	0.88051282	7.94947869	0.853919
40	0.08938688	9.01811220	0.80610091		40.00000000	0.85850000	7.74204932	0.875404
41	0.09950990	9.03534030	0.89910576		41.00000000	0.83756098	7.56764844	0.896781
42	0.10936348	9.02812390	0.98734705		42.00000000	0.81761905	7.38156606	0.918171
43	0.11949542	9.02799890	1.07880452		43.00000000	0.79860465	7.20980191	0.939665
44	0.12934230	9.02763650	1.16765527		44.00000000	0.78045455	7.04565994	0.961043
45	0.13946830	9.02667520	1.25893504		45.00000000	0.76311111	6.88835614	0.982399
46	0.14926532	9.02763650	1.34751305		46.00000000	0.74652174	6.73932690	1.003779
47	0.15946276	9.02187250	1.43865269		47.00000000	0.73063830	6.59172557	1.025261
48	0.16959471	9.03400330	1.53211917		48.00000000	0.71541667	6.46307653	1.046690
49	0.17941852	9.02194400	1.61870384		49.00000000	0.70081633	6.32272565	1.068044
50	0.18955716	9.02995970	1.71169352		50.00000000	0.68680000	6.20177632	1.089416
51	0.19933854	9.02288060	1.79860785		51.00000000	0.67333333	6.07540627	1.110897
52	0.20945561	9.02457620	1.89024811		52.00000000	0.66038462	5.95969128	1.132285
53	0.21927495	9.02214620	1.97833066		53.00000000	0.64792453	5.84566982	1.153627
54	0.22942252	9.03390310	2.07258081		54.00000000	0.63592593	5.74489319	1.175017
55	0.23924708	9.01391220	2.15655217		55.00000000	0.62436364	5.62795900	1.196492
56	0.24940433	9.04260440	2.25526469		56.00000000	0.61321429	5.54505420	1.217875
57	0.25953552	9.02136040	2.34136346		57.00000000	0.60245614	5.43497397	1.239230
58	0.26938540	9.04004960	2.43525738		58.00000000	0.59206897	5.35233281	1.260600
59	0.27952403	9.01736640	2.52057060		59.00000000	0.58203390	5.24841292	1.282081
60	0.28935975	9.01203160	2.60771921		60.00000000	0.57233333	5.15788609	1.303462
61	0.29947531	9.03404140	2.70547235		61.00000000	0.56295082	5.08572101	1.324812
62	0.30931327	9.01760480	2.78926483		62.00000000	0.55387097	4.99458950	1.346184
63	0.31944597	9.03480630	2.88613246		63.00000000	0.54507937	4.92468648	1.367677
64	0.32928467	9.02218440	2.97086701		64.00000000	0.53656250	4.84096582	1.389062
65	0.33945382	9.03932670	3.06843398		65.00000000	0.52830769	4.77554583	1.410427
66	0.34924489	9.01480290	3.14837385		66.00000000	0.52030303	4.69042927	1.431783
67	0.35939172	9.03415490	3.24680047		67.00000000	0.51253731	4.63034148	1.453265
68	0.36954898	9.01302050	3.33075253		68.00000000	0.50500000	4.55157535	1.474679
69	0.37939066	9.03426840	3.42751705		69.00000000	0.49768116	4.49618517	1.496060
70	0.38956055	9.02309700	3.51504263		70.00000000	0.49057143	4.42647359	1.517412
71	0.39934343	9.01629160	3.60059681		71.00000000	0.48366197	4.36083737	1.538888
72	0.40947759	9.01995180	3.69346812		72.00000000	0.47694444	4.30201590	1.560261
73	0.41934383	9.02134990	3.78304742		73.00000000	0.47041096	4.24374186	1.581638
74	0.42946759	9.02496620	3.87593048		74.00000000	0.46405405	4.18807215	1.603141
75	0.43930256	9.00908760	3.95771525		75.00000000	0.45786667	4.12496091	1.624521
76	0.44944346	9.01368330	4.05114101		76.00000000	0.45184211	4.07276164	1.645882
77	0.45956644	9.00578980	4.13875876		77.00000000	0.44597403	4.01634833	1.667263
78	0.46946841	9.01364990	4.23162389		78.00000000	0.44025641	3.96831715	1.688738
79	0.47955868	8.99009610	4.31127862		79.00000000	0.43468354	3.90784684	1.710128
80	0.48942715	9.00480650	4.40719678		80.00000000	0.42925000	3.86531319	1.731475
81	0.49953973	8.97892480	4.48532967		81.00000000	0.42395062	3.80662071	1.752849
82	0.50934869	8.96102620	4.56428696		82.00000000	0.41878049	3.75270292	1.774334
83	0.51952899	8.94428440	4.64681504		83.00000000	0.41373494	3.70056297	1.795713
84	0.52926272	8.90734290	4.71432453		84.00000000	0.40880952	3.64140661	1.817062
85	0.53938425	8.85731890	4.77749831		85.00000000	0.40400000	3.57835684	1.838432
86	0.54953778	8.78271770	4.82643519		86.00000000	0.39930233	3.50695960	1.859924
87	0.55936384	8.68261910	4.85674316		87.00000000	0.39471264	3.42713954	1.881298
88	0.56951219	8.53720660	4.86204323		88.00000000	0.39022727	3.33145085	1.902659
89	0.57928461	8.33997730	4.83122050		89.00000000	0.38584270	3.21791933	1.924040
90	0.58944708	8.05780980	4.74965246		90.00000000	0.38155556	3.07450209	1.945515
91	0.59925079	7.68560740	4.60560631		91.00000000	0.37736264	2.90026108	1.966914
92	0.60937083	7.16281600	4.36481113		92.00000000	0.37326087	2.67359893	1.988365
93	0.61914998	6.50418660	4.02706700		93.00000000	0.36924731	2.40165342	2.009776
94	0.62923503	5.62627510	3.54024938		94.00000000	0.36531915	2.05538603	2.031275
95	0.63938040	4.50786160	2.88223835		95.00000000	0.36147368	1.62947334	2.052649
96	0.64917594	3.14510320	2.04172533		96.00000000	0.35770833	1.12502962	2.074028
97	0.65927362	1.42633020	0.94034187		97.00000000	0.35402062	0.50495030	2.095400
98	0.66897386	-0.60581547	-0.40527471		98.00000000	0.35040816	-0.21228269	2.116995
99	0.67907232	-3.08252430	-2.09325693		99.00000000	0.34686869	-1.06923116	2.138419
100	0.68882394	-5.96031050	-4.10560456		100.00000000	0.34340000	-2.04677063	2.159818
101	0.69911218	-9.47371670	-6.62319073		101.00000000	0.34000000	-3.22106368	2.181185
11:19 02/04/2018
Test Lot:	JK-PERC
Recipe:	Recipe_YJX-LID
Cell Name:	1-20
Test Order:	3
Test Condition:	Light
1	-0.29983711	9.02259640	-2.70530923		1.00000000	34.34000000	309.83596038	0.000000
2	-0.28999591	9.01902200	-2.61547949		2.00000000	17.17000000	154.85660774	0.021571
3	-0.27985549	9.03232770	-2.52774649		3.00000000	11.44666667	103.39004441	0.043095
4	-0.27008054	9.01827910	-2.43566169		4.00000000	8.58500000	77.42192607	0.064457
5	-0.25989544	9.02469440	-2.34547692		5.00000000	6.86800000	61.98160114	0.085843
6	-0.24977289	9.01829240	-2.25252496		6.00000000	5.72333333	51.61469350	0.107353
7	-0.23995177	9.02890970	-2.16650286		7.00000000	4.90571429	44.29325130	0.128755
8	-0.22978827	9.01249310	-2.07096520		8.00000000	4.29250000	38.68612663	0.150111
9	-0.21995229	9.03236770	-1.98668996		9.00000000	3.81555556	34.46350076	0.171499
10	-0.20979846	9.02684590	-1.89381837		10.00000000	3.43400000	30.99818882	0.192995
11	-0.19996692	9.03351780	-1.80640473		11.00000000	3.12181818	28.20100011	0.214387
12	-0.18987116	9.02191930	-1.71300228		12.00000000	2.86166667	25.81772573	0.235808
13	-0.18006940	9.01670930	-1.62363343		13.00000000	2.64153846	23.81798441	0.257195
14	-0.16992824	9.02661510	-1.53387682		14.00000000	2.45285714	22.14099732	0.278685
15	-0.16011234	9.02874280	-1.44561314		15.00000000	2.28933333	20.66980185	0.300069
16	-0.14995776	9.03112980	-1.35428800		16.00000000	2.14625000	19.38306233	0.321410
17	-0.13980693	9.01502510	-1.26036298		17.00000000	2.02000000	18.21035070	0.342788
18	-0.12999995	9.03294660	-1.17428261		18.00000000	1.90777778	17.23285479	0.364271
19	-0.11985581	9.02029710	-1.08113502		19.00000000	1.80736842	16.30300013	0.385642
20	-0.11001311	9.00943760	-0.99115625		20.00000000	1.71700000	15.46920436	0.406996
21	-0.09989874	9.02389140	-0.90147539		21.00000000	1.63523810	14.75621098	0.428369
22	-0.09006051	9.02425190	-0.81272873		22.00000000	1.56090909	14.08603683	0.449846
23	-0.07991488	9.02677730	-0.72137378		23.00000000	1.49304348	13.47737098	0.471241
24	-0.07009302	9.02454280	-0.63255747		24.00000000	1.43083333	12.91261666	0.492595
25	-0.05995037	9.01985650	-0.54074371		25.00000000	1.37360000	12.38967489	0.513974
26	-0.04978911	9.03311350	-0.44975064		26.00000000	1.32076923	11.93065837	0.535446
27	-0.03994268	9.00120540	-0.35953228		27.00000000	1.27185185	11.44819976	0.556827
28	-0.02981417	9.01920410	-0.26890009		28.00000000	1.22642857	11.06140960	0.578190
29	-0.01997743	9.03156380	-0.18042740		29.00000000	1.18413793	10.69461727	0.599579
30	-0.00984073	9.02493000	-0.08881187		30.00000000	1.14466667	10.33053654	0.621056
31	-0.00060613	9.02591420	-0.00547084		31.00000000	1.10774194	9.99838367	0.642559
32	0.00953260	9.02322580	0.08601478		32.00000000	1.07312500	9.68304919	0.663950
33	0.01935641	9.01907060	0.17457682		33.00000000	1.04060606	9.38529953	0.685294
34	0.02948984	9.02191070	0.26605473		34.00000000	1.01000000	9.11212981	0.706781
35	0.03932333	9.00187300	0.35398362		35.00000000	0.98114286	8.83212339	0.728161
36	0.04946346	9.02807710	0.44655995		36.00000000	0.95388889	8.61178243	0.749548
37	0.05929546	9.01201820	0.53437177		37.00000000	0.92810811	8.36412716	0.771041
38	0.06943038	9.03101440	0.62702677		38.00000000	0.90368421	8.16118512	0.792490
39	0.07954893	9.02412890	0.71785983		39.00000000	0.88051282	7.94586119	0.813867
40	0.08941070	9.02226640	0.80668715		40.00000000	0.85850000	7.74561570	0.835263
41	0.09955009	9.02077580	0.89801905		41.00000000	0.83756098	7.55544978	0.856619
42	0.10936348	9.02358150	0.98685027		42.00000000	0.81761905	7.37785211	0.878121
43	0.11953040	9.02999970	1.07935948		43.00000000	0.79860465	7.21139976	0.899511
44	0.12930733	9.01391030	1.16556467		44.00000000	0.78045455	7.03494727	0.920913
45	0.13948318	9.02813530	1.25927302		45.00000000	0.76311111	6.88947036	0.942260
46	0.14929806	9.01662540	1.34616468		46.00000000	0.74652174	6.73110687	0.963741
47	0.15944564	9.03435520	1.44048855		47.00000000	0.73063830	6.60084591	0.985123
48	0.16954483	9.02045920	1.52937222		48.00000000	0.71541667	6.45338685	1.006514
49	0.17939173	9.01845260	1.61783581		49.00000000	0.70081633	6.32027882	1.027865
50	0.18955195	9.01259990	1.70835589		50.00000000	0.68680000	6.18985361	1.049343
51	0.19932887	9.03087620	1.80011435		51.00000000	0.67333333	6.08078997	1.070766
52	0.20948909	9.01817890	1.88921009		52.00000000	0.66038462	5.95546660	1.092147
53	0.21929504	9.01810070	1.97762475		53.00000000	0.64792453	5.84304864	1.113641
54	0.22943667	9.02230260	2.07004706		54.00000000	0.63592593	5.73751613	1.135029
55	0.23928280	9.02236650	2.15889712		55.00000000	0.62436364	5.63323756	1.156386
56	0.24941401	9.01708600	2.24898758		56.00000000	0.61321429	5.52940595	1.177761
57	0.25954297	9.01935390	2.34090990		57.00000000	0.60245614	5.43376514	1.199246
58	0.26939210	9.00941470	2.42706515		58.00000000	0.59206897	5.33419484	1.220640
59	0.27951214	9.02393820	2.52230028		59.00000000	0.58203390	5.25223793	1.241999
60	0.28937092	9.02338790	2.61110606		60.00000000	0.57233333	5.16438567	1.263386
61	0.29950139	9.02175710	2.70202879		61.00000000	0.56295082	5.07880555	1.284880
62	0.30934975	9.01671410	2.78931825		62.00000000	0.55387097	4.99409616	1.306268
63	0.31947351	9.01119330	2.87883755		63.00000000	0.54507937	4.91181552	1.327626
64	0.32930252	9.01553250	2.96883757		64.00000000	0.53656250	4.83739666	1.348999
65	0.33942702	9.02507310	3.06335367		65.00000000	0.52830769	4.76801554	1.370474
66	0.34927839	9.01961800	3.15035765		66.00000000	0.52030303	4.69293458	1.391860
67	0.35939470	9.00572780	3.23661084		67.00000000	0.51253731	4.61577153	1.413199
68	0.36957577	9.02102660	3.33395285		68.00000000	0.50500000	4.55561843	1.434585
69	0.37941894	9.01002690	3.41857486		69.00000000	0.49768116	4.48412063	1.456067
70	0.38956502	9.01533220	3.51205807		70.00000000	0.49057143	4.42266440	1.477449
71	0.39935085	9.00916770	3.59781878		71.00000000	0.48366197	4.35739181	1.498818
72	0.40952301	9.00895690	3.68937515		72.00000000	0.47694444	4.29677194	1.520187
73	0.41935650	9.01780220	3.78167397		73.00000000	0.47041096	4.24207298	1.541665
74	0.42948174	9.00367550	3.86691422		74.00000000	0.46405405	4.17819212	1.563051
75	0.43928024	9.02367780	3.96392335		75.00000000	0.45786667	4.13164128	1.584417
76	0.44946057	9.00787260	4.04868355		76.00000000	0.45184211	4.07013612	1.605791
77	0.45956644	8.99911400	4.13569078		77.00000000	0.44597403	4.01337110	1.627279
78	0.46944162	9.00314140	4.22644928		78.00000000	0.44025641	3.96369071	1.648663
79	0.47956911	8.98666290	4.30972593		79.00000000	0.43468354	3.90635448	1.670048
80	0.48936015	8.99260430	4.40062219		80.00000000	0.42925000	3.86007540	1.691403
81	0.49950701	8.98005580	4.48560082		81.00000000	0.42395062	3.80710020	1.712882
82	0.50930923	8.95596600	4.56135615		82.00000000	0.41878049	3.75058381	1.734265
83	0.51951408	8.93297770	4.64080769		83.00000000	0.41373494	3.69588499	1.755652
84	0.52925086	8.90319540	4.71202382		84.00000000	0.40880952	3.63971107	1.777129
85	0.53939170	8.84149840	4.76903085		85.00000000	0.40400000	3.57196535	1.798517
86	0.54954451	8.78699870	4.82884689		86.00000000	0.39930233	3.50866902	1.819878
87	0.55938840	8.67015930	4.84998654		87.00000000	0.39471264	3.42222150	1.841255
88	0.56948465	8.51844220	4.85112207		88.00000000	0.39022727	3.32412847	1.862741
89	0.57932258	8.33087730	4.82626533		89.00000000	0.38584270	3.21440816	1.884122
90	0.58944410	8.03728010	4.73752733		90.00000000	0.38155556	3.06666887	1.905479
91	0.59922177	7.66169120	4.59105216		91.00000000	0.37736264	2.89123600	1.926858
92	0.60936040	7.15136620	4.35775937		92.00000000	0.37326087	2.66932517	1.948330
93	0.61914927	6.48177290	4.01318496		93.00000000	0.36924731	2.39337722	1.969758
94	0.62929010	5.60330680	3.52610550		94.00000000	0.36531915	2.04699527	1.991222
95	0.63940120	4.48434350	2.86729462		95.00000000	0.36147368	1.62097217	2.012633
96	0.64918482	3.11873460	2.02463516		96.00000000	0.35770833	1.11559736	2.034136
97	0.65931010	1.40167070	0.92413565		97.00000000	0.35402062	0.49622033	2.055520
98	0.66898656	-0.62586778	-0.41869713		98.00000000	0.35040816	-0.21930918	2.076893
99	0.67909020	-3.08026340	-2.09177669		99.00000000	0.34686869	-1.06844692	2.098268
100	0.68883806	-5.96058850	-4.10588022		100.00000000	0.34340000	-2.04686609	2.119757
101	0.69913900	-9.43705750	-6.59781494		101.00000000	0.34000000	-3.20859955	2.141139
11:19 02/04/2018
Test Lot:	JK-PERC
Recipe:	Recipe_YJX-LID
Cell Name:	1-20
Test Order:	4
Test Condition:	Light
1	-0.29983714	9.01731010	-2.70372447		1.00000000	34.34000000	309.65442883	0.000000
2	-0.29005527	9.02763180	-2.61851218		2.00000000	17.17000000	155.00443801	0.061779
3	-0.27990794	9.01070310	-2.52216734		3.00000000	11.44666667	103.14251482	0.083192
4	-0.27010971	9.02108670	-2.43668311		4.00000000	8.58500000	77.44602932	0.104606
5	-0.25992221	9.01654240	-2.34359963		5.00000000	6.86800000	61.92561320	0.126086
6	-0.24976000	9.02095130	-2.25307280		6.00000000	5.72333333	51.62991127	0.147512
7	-0.23995656	9.03394320	-2.16775393		7.00000000	4.90571429	44.31794421	0.168903
8	-0.22983752	9.01815130	-2.07270953		8.00000000	4.29250000	38.71041446	0.190275
9	-0.22000356	9.02570250	-1.98568668		9.00000000	3.81555556	34.43806932	0.211779
10	-0.20985550	9.02466960	-1.89387655		10.00000000	3.43400000	30.99071541	0.233179
11	-0.20003195	9.01593300	-1.80347466		11.00000000	3.12181818	28.14610357	0.254557
12	-0.18989877	9.01147940	-1.71126885		12.00000000	2.86166667	25.78785022	0.275919
13	-0.18009384	9.02486130	-1.62532193		13.00000000	2.64153846	23.83951823	0.297388
14	-0.16994950	9.01855850	-1.53269951		14.00000000	2.45285714	22.12123564	0.318761
15	-0.16014978	9.02083970	-1.44468549		15.00000000	2.28933333	20.65170902	0.340141
16	-0.14998013	9.01794430	-1.35251246		16.00000000	2.14625000	19.35476295	0.361492
17	-0.13984025	9.01914600	-1.26123963		17.00000000	2.02000000	18.21867492	0.382978
18	-0.13000554	9.02172950	-1.17287482		18.00000000	1.90777778	17.21145506	0.404360
19	-0.11989246	9.02337460	-1.08183458		19.00000000	1.80736842	16.30856230	0.425751
20	-0.11003914	9.01155570	-0.99162384		20.00000000	1.71700000	15.47284114	0.447230
21	-0.09987471	9.02644350	-0.90151338		21.00000000	1.63523810	14.76038428	0.468605
22	-0.09008540	9.01893520	-0.81247440		22.00000000	1.56090909	14.07773794	0.489971
23	-0.07992915	9.02211760	-0.72113020		23.00000000	1.49304348	13.47041384	0.511344
24	-0.07011901	9.01543900	-0.63215364		24.00000000	1.43083333	12.89959064	0.532831
25	-0.05995531	9.00704860	-0.54002043		25.00000000	1.37360000	12.37208196	0.554196
26	-0.04976855	9.02294730	-0.44905896		26.00000000	1.32076923	11.91723116	0.575543
27	-0.03997254	9.02100470	-0.36059251		27.00000000	1.27185185	11.47338153	0.596934
28	-0.02982001	9.01562310	-0.26884601		28.00000000	1.22642857	11.05701776	0.618415
29	-0.01999871	9.01816940	-0.18035171		29.00000000	1.18413793	10.67875646	0.639805
30	-0.00987148	9.01383880	-0.08897995		30.00000000	1.14466667	10.31784081	0.661173
31	-0.00062479	9.02568910	-0.00563915		31.00000000	1.10774194	9.99813431	0.682663
32	0.00950892	9.02449420	0.08581323		32.00000000	1.07312500	9.68441034	0.704141
33	0.01932995	9.00557520	0.17407735		33.00000000	1.04060606	9.37125613	0.725525
34	0.02947475	9.02849290	0.26611259		34.00000000	1.01000000	9.11877783	0.746884
35	0.03928238	9.01346680	0.35407045		35.00000000	0.98114286	8.84349857	0.768253
36	0.04943983	9.02070430	0.44598211		36.00000000	0.95388889	8.60474960	0.789739
37	0.05927054	9.00935170	0.53398912		37.00000000	0.92810811	8.36165236	0.811116
38	0.06937291	9.02350330	0.62598666		38.00000000	0.90368421	8.15439746	0.832481
39	0.07956609	9.01451300	0.71724956		39.00000000	0.88051282	7.93739427	0.853855
40	0.08935065	9.02567100	0.80644955		40.00000000	0.85850000	7.74853855	0.875319
41	0.09951480	9.01920410	0.89754427		41.00000000	0.83756098	7.55413339	0.896716
42	0.10931573	9.02266690	0.98631942		42.00000000	0.81761905	7.37710432	0.918077
43	0.11947095	9.01243880	1.07672463		43.00000000	0.79860465	7.19737554	0.939440
44	0.12930016	9.00557330	1.16442207		44.00000000	0.78045455	7.02844062	0.960925
45	0.13946059	9.01809310	1.25766858		45.00000000	0.76311111	6.88180705	0.982293
46	0.14927939	9.01762580	1.34614568		46.00000000	0.74652174	6.73185370	1.003673
47	0.15939143	9.00663660	1.43558069		47.00000000	0.73063830	6.58059363	1.025022
48	0.16953847	9.01154900	1.52780423		48.00000000	0.71541667	6.44701235	1.046484
49	0.17938629	9.01586630	1.61732281		49.00000000	0.70081633	6.31846630	1.067863
50	0.18952513	9.01540950	1.70864666		50.00000000	0.68680000	6.19178324	1.089253
51	0.19931638	9.01645760	1.79712769		51.00000000	0.67333333	6.07108145	1.110736
52	0.20946267	9.01633360	1.88858531		52.00000000	0.66038462	5.95424800	1.132140
53	0.21926807	9.01695440	1.97713019		53.00000000	0.64792453	5.84230593	1.153496
54	0.22940394	9.02314090	2.06994407		54.00000000	0.63592593	5.73804923	1.174871
55	0.23926516	9.01394270	2.15672244		55.00000000	0.62436364	5.62797804	1.196356
56	0.24939731	9.02451420	2.25068957		56.00000000	0.61321429	5.53396103	1.217732
57	0.25957486	9.01373580	2.33973921		57.00000000	0.60245614	5.43038048	1.239082
58	0.26938918	9.01969810	2.42980908		58.00000000	0.59206897	5.34028332	1.260463
59	0.27951685	9.01336670	2.51938787		59.00000000	0.58203390	5.24608496	1.281952
60	0.28936023	9.02766510	2.61224725		60.00000000	0.57233333	5.16683366	1.303328
61	0.29950130	9.01682760	2.70055159		61.00000000	0.56295082	5.07603049	1.324685
62	0.30936030	9.02000520	2.79043151		62.00000000	0.55387097	4.99591901	1.346065
63	0.31945521	9.00569340	2.87691568		63.00000000	0.54507937	4.90881764	1.367541
64	0.32928294	9.01245210	2.96764672		64.00000000	0.53656250	4.83574383	1.388944
65	0.33944634	9.02170090	3.06238335		65.00000000	0.52830769	4.76623398	1.410293
66	0.34923312	9.01243400	3.14744044		66.00000000	0.52030303	4.68919672	1.431671
67	0.35941291	9.01618190	3.24053217		67.00000000	0.51253731	4.62112965	1.453155
68	0.36957633	9.01428130	3.33146500		68.00000000	0.50500000	4.55221206	1.474528
69	0.37939289	9.01978300	3.42204154		69.00000000	0.49768116	4.48897606	1.495895
70	0.38953769	9.00375560	3.50730216		70.00000000	0.49057143	4.41698525	1.517267
71	0.39934605	9.00793650	3.59728386		71.00000000	0.48366197	4.35679633	1.538745
72	0.40950054	9.02114680	3.69416449		72.00000000	0.47694444	4.30258585	1.560136
73	0.41929552	9.01098350	3.77826501		73.00000000	0.47041096	4.23886539	1.581495
74	0.42946264	9.01670930	3.87233978		74.00000000	0.46405405	4.18424050	1.602851
75	0.43927771	9.00970360	3.95776197		75.00000000	0.45786667	4.12524295	1.624333
76	0.44943368	9.00723360	4.04815414		76.00000000	0.45184211	4.06984739	1.645707
77	0.45955762	9.00183010	4.13685962		77.00000000	0.44597403	4.01458241	1.667093
78	0.46942854	8.99616910	4.22305853		78.00000000	0.44025641	3.96062111	1.688449
79	0.47955397	8.99532700	4.31374477		79.00000000	0.43468354	3.91012062	1.709925
80	0.48938543	8.99548720	4.40226037		80.00000000	0.42925000	3.86131288	1.731325
81	0.49952129	8.97482870	4.48311801		81.00000000	0.42395062	3.80488417	1.752708
82	0.50934380	8.95238300	4.55984078		82.00000000	0.41878049	3.74908332	1.774185
83	0.51946253	8.93576150	4.64179328		83.00000000	0.41373494	3.69703675	1.795564
84	0.52923149	8.89849660	4.70936461		84.00000000	0.40880952	3.63779016	1.816916
85	0.53938222	8.84054470	4.76843263		85.00000000	0.40400000	3.57158006	1.838295
86	0.54954863	8.78248500	4.82640260		86.00000000	0.39930233	3.50686668	1.859786
87	0.55937040	8.66012860	4.84421960		87.00000000	0.39471264	3.41826225	1.881170
88	0.56950253	8.51295470	4.84814924		88.00000000	0.39022727	3.32198710	1.902525
89	0.57931018	8.33409210	4.82802439		89.00000000	0.38584270	3.21564857	1.923910
90	0.58945572	8.01898100	4.72683422		90.00000000	0.38155556	3.05968675	1.945397
91	0.59925592	7.64938120	4.58393697		91.00000000	0.37736264	2.88659066	1.966759
92	0.60937095	7.15371180	4.35926416		92.00000000	0.37326087	2.67020069	1.988214
93	0.61915994	6.46426490	4.00241387		93.00000000	0.36924731	2.38691244	2.009626
94	0.62926602	5.59354110	3.51982535		94.00000000	0.36531915	2.04342767	2.031157
95	0.63938999	4.46036200	2.85191081		95.00000000	0.36147368	1.61230349	2.052535
96	0.64912617	3.11260870	2.02047576		96.00000000	0.35770833	1.11340607	2.073873
97	0.65930295	1.36733830	0.90149017		97.00000000	0.35402062	0.48406595	2.095252
98	0.66899228	-0.64735961	-0.43307858		98.00000000	0.35040816	-0.22684009	2.116747
99	0.67907530	-3.13040070	-2.12577779		99.00000000	0.34686869	-1.08583798	2.138145
100	0.68880624	-6.01958080	-4.14632482		100.00000000	0.34340000	-2.06712405	2.159544
101	0.69911927	-9.53492740	-6.66605148		101.00000000	0.34000000	-3.24187532	2.180946
15:47 02/04/2018
Test Lot:	JK-PERC
Recipe:	Recipe_YJX-LID
Cell Name:	1-20
Test Order:	2
Test Condition:	Light
1	-0.29992473	8.99249080	-2.69707038		1.00000000	34.34000000	308.80213407	0.000000
2	-0.29011270	9.00856690	-2.61349967		2.00000000	17.17000000	154.67709367	0.061794
3	-0.27999780	8.99888230	-2.51966725		3.00000000	11.44666667	103.00720606	0.083213
4	-0.27014410	8.99948980	-2.43115907		4.00000000	8.58500000	77.26061993	0.104707
5	-0.25998080	9.00447180	-2.34098978		5.00000000	6.86800000	61.84271232	0.126091
6	-0.24981450	9.00376700	-2.24927155		6.00000000	5.72333333	51.53155980	0.147456
7	-0.23999579	8.99345400	-2.15839110		7.00000000	4.90571429	44.11931577	0.168840
8	-0.22988234	8.99885940	-2.06867886		8.00000000	4.29250000	38.62760397	0.190327
9	-0.22006960	8.99465180	-1.97944942		9.00000000	3.81555556	34.31959365	0.211764
10	-0.20993829	9.00957300	-1.89145435		10.00000000	3.43400000	30.93887368	0.233124
11	-0.20011215	9.00042440	-1.80109428		11.00000000	3.12181818	28.09768854	0.254505
12	-0.18995181	9.00451850	-1.71042459		12.00000000	2.86166667	25.76793044	0.275982
13	-0.18016213	8.99483680	-1.62052896		13.00000000	2.64153846	23.76020736	0.297374
14	-0.16999137	9.00229550	-1.53031255		14.00000000	2.45285714	22.08134482	0.318725
15	-0.16019128	9.00008390	-1.44173496		15.00000000	2.28933333	20.60419208	0.340107
16	-0.15004361	9.02099130	-1.35354210		16.00000000	2.14625000	19.36130258	0.361587
17	-0.13989666	8.98514750	-1.25699212		17.00000000	2.02000000	18.14999795	0.382962
18	-0.13007647	8.99156090	-1.16959050		18.00000000	1.90777778	17.15390007	0.404344
19	-0.11995111	9.01057620	-1.08082862		19.00000000	1.80736842	16.28543088	0.425708
20	-0.11013688	8.99312020	-0.99047420		20.00000000	1.71700000	15.44118738	0.447248
21	-0.09998771	9.00573160	-0.90046246		21.00000000	1.63523810	14.72651539	0.468629
22	-0.09015561	9.00460530	-0.81181567		22.00000000	1.56090909	14.05537027	0.490021
23	-0.08000048	9.00079820	-0.72006819		23.00000000	1.49304348	13.43858305	0.511376
24	-0.07017285	9.00182630	-0.63168377		24.00000000	1.43083333	12.88011313	0.532855
25	-0.06001921	9.00325010	-0.54036796		25.00000000	1.37360000	12.36686434	0.554227
26	-0.04984771	8.99781800	-0.44852063		26.00000000	1.32076923	11.88404116	0.575618
27	-0.04001115	8.98471070	-0.35948856		27.00000000	1.27185185	11.42722094	0.597103
28	-0.02986867	9.00230030	-0.26888675		28.00000000	1.22642857	11.04067830	0.618480
29	-0.02005964	8.99471000	-0.18043067		29.00000000	1.18413793	10.65097729	0.639841
30	-0.00992313	8.99905780	-0.08929879		30.00000000	1.14466667	10.30092150	0.661226
31	-0.00065520	9.00127890	-0.00589763		31.00000000	1.10774194	9.97109411	0.682825
32	0.00948186	9.00525950	0.08538657		32.00000000	1.07312500	9.66376910	0.704226
33	0.01933228	8.99493220	0.17389258		33.00000000	1.04060606	9.36018096	0.725575
34	0.02944470	9.00544640	0.26516262		34.00000000	1.01000000	9.09550086	0.746958
35	0.03925940	9.00410940	0.35349593		35.00000000	0.98114286	8.83431762	0.768439
36	0.04943433	8.99505230	0.44466438		36.00000000	0.95388889	8.58028044	0.789835
37	0.05926838	9.00021080	0.53342792		37.00000000	0.92810811	8.35316862	0.811196
38	0.06937856	8.99403950	0.62399353		38.00000000	0.90368421	8.12777149	0.832571
39	0.07951553	9.00291920	0.71587191		39.00000000	0.88051282	7.92718578	0.854059
40	0.08938606	8.99029640	0.80360718		40.00000000	0.85850000	7.71816946	0.875453
41	0.09948582	8.98744390	0.89412318		41.00000000	0.83756098	7.52753228	0.896812
42	0.10932434	9.00968840	0.98497824		42.00000000	0.81761905	7.36649285	0.918198
43	0.11946280	8.99331380	1.07436645		43.00000000	0.79860465	7.18210223	0.939682
44	0.12928718	8.99483200	1.16291646		44.00000000	0.78045455	7.02005752	0.961073
45	0.13941075	8.99266430	1.25367407		45.00000000	0.76311111	6.86240205	0.982428
46	0.14921801	8.99879740	1.34278264		46.00000000	0.74652174	6.71779789	1.003809
47	0.15939294	9.00413420	1.43519542		47.00000000	0.73063830	6.57876529	1.025293
48	0.16953439	9.00156590	1.52607498		48.00000000	0.71541667	6.43987027	1.046689
49	0.17935653	8.99371430	1.61308139		49.00000000	0.70081633	6.30294182	1.068058
50	0.18950838	8.99554630	1.70473141		50.00000000	0.68680000	6.17814120	1.089423
51	0.19925909	9.00560470	1.79444860		51.00000000	0.67333333	6.06377383	1.110905
52	0.20942582	9.00530240	1.88594284		52.00000000	0.66038462	5.94696316	1.132282
53	0.21926062	8.99902440	1.97313167		53.00000000	0.64792453	5.83068864	1.153679
54	0.22938792	8.99844170	2.06413382		54.00000000	0.63592593	5.72234237	1.175034
55	0.23922049	8.99405290	2.15156174		55.00000000	0.62436364	5.61555957	1.196513
56	0.24936192	9.00002380	2.24426321		56.00000000	0.61321429	5.51894317	1.217890
57	0.25951529	8.99014950	2.33308125		57.00000000	0.60245614	5.41617077	1.239281
58	0.26933891	8.99539470	2.42280980		58.00000000	0.59206897	5.32589403	1.260769
59	0.27949226	9.00095840	2.51569821		59.00000000	0.58203390	5.23886291	1.282151
60	0.28931513	8.99909110	2.60357321		60.00000000	0.57233333	5.15047981	1.303513
61	0.29945731	9.00019450	2.69517403		61.00000000	0.56295082	5.06666687	1.324899
62	0.30930626	8.99007890	2.78068768		62.00000000	0.55387097	4.97934370	1.346379
63	0.31944323	9.00703620	2.87723674		63.00000000	0.54507937	4.90954957	1.367772
64	0.32923487	8.99062630	2.96002768		64.00000000	0.53656250	4.82403292	1.389121
65	0.33940235	8.99057960	3.05142384		65.00000000	0.52830769	4.74979236	1.410504
66	0.34924534	9.00209520	3.14393980		66.00000000	0.52030303	4.68381741	1.431989
67	0.35938826	8.97822670	3.22666927		67.00000000	0.51253731	4.60167619	1.453380
68	0.36955056	8.98973370	3.32216112		68.00000000	0.50500000	4.53981552	1.474752
69	0.37933400	9.00392720	3.41549572		69.00000000	0.49768116	4.48108493	1.496133
70	0.38951337	9.00464820	3.50743087		70.00000000	0.49057143	4.41742313	1.517612
71	0.39932734	8.99559500	3.59218702		71.00000000	0.48366197	4.35082722	1.539011
72	0.40947846	8.99212840	3.68208289		72.00000000	0.47694444	4.28874568	1.560361
73	0.41929689	8.99863720	3.77310059		73.00000000	0.47041096	4.23305755	1.581744
74	0.42942268	8.99447630	3.86243212		74.00000000	0.46405405	4.17392319	1.603225
75	0.43924782	8.99000070	3.94883821		75.00000000	0.45786667	4.11622165	1.624594
76	0.44940341	8.98881910	4.03960596		76.00000000	0.45184211	4.06152695	1.645942
77	0.45953590	8.98851200	4.13054395		77.00000000	0.44597403	4.00864288	1.667323
78	0.46941090	8.99130440	4.22061629		78.00000000	0.44025641	3.95847940	1.688807
79	0.47953966	8.96863560	4.30081647		79.00000000	0.43468354	3.89851831	1.710198
80	0.48934841	8.96165850	4.38537334		80.00000000	0.42925000	3.84679191	1.731561
81	0.49948540	8.95445920	4.47262164		81.00000000	0.42395062	3.79624851	1.752920
82	0.50929487	8.92224500	4.54405361		82.00000000	0.41878049	3.73646211	1.774391
83	0.51945418	8.90976330	4.62821379		83.00000000	0.41373494	3.68628038	1.795786
84	0.52922648	8.86182690	4.68991346		84.00000000	0.40880952	3.62279924	1.817172
85	0.53936863	8.81863980	4.75649767		85.00000000	0.40400000	3.56273048	1.838523
86	0.54952127	8.73083590	4.79778003		86.00000000	0.39930233	3.48624308	1.859999
87	0.55932254	8.63727380	4.83102192		87.00000000	0.39471264	3.40924118	1.881372
88	0.56945729	8.47531510	4.82632997		88.00000000	0.39022727	3.30729910	1.902766
89	0.57926607	8.28563690	4.79958832		89.00000000	0.38584270	3.19695248	1.924254
90	0.58941346	7.97674040	4.70159816		90.00000000	0.38155556	3.04356961	1.945630
91	0.59921026	7.61379000	4.56226109		91.00000000	0.37736264	2.87315987	1.966996
92	0.60932195	7.09915300	4.32566975		92.00000000	0.37326087	2.64983602	1.988466
93	0.61913514	6.43072840	3.98148993		93.00000000	0.36924731	2.37452917	2.009970
94	0.62922299	5.57656960	3.50890580		94.00000000	0.36531915	2.03722766	2.031368
95	0.63934660	4.48148540	2.86522245		95.00000000	0.36147368	1.61993904	2.052718
96	0.64914715	3.15777300	2.04985934		96.00000000	0.35770833	1.12956172	2.074094
97	0.65925360	1.50262330	0.99060982		97.00000000	0.35402062	0.53195963	2.095588
98	0.66897082	-0.42932853	-0.28720826		98.00000000	0.35040816	-0.15044022	2.116973
99	0.67903632	-2.80917720	-1.90753335		99.00000000	0.34686869	-0.97441561	2.138330
100	0.68877959	-5.51590590	-3.79924340		100.00000000	0.34340000	-1.89416209	2.159710
101	0.69903195	-8.80678180	-6.15622185		101.00000000	0.34000000	-2.99430581	2.181185
15:49 02/04/2018
Test Lot:	JK-PERC
Recipe:	Recipe_YJX-LID
Cell Name:	1-20
Test Order:	3
Test Condition:	Light
1	-0.29992616	9.01379390	-2.70347259		1.00000000	34.34000000	309.53368253	0.000000
2	-0.29010665	9.00594520	-2.61268459		2.00000000	17.17000000	154.63207908	0.061787
3	-0.27997231	8.99412160	-2.51810500		3.00000000	11.44666667	102.95271191	0.083200
4	-0.27013421	9.00458150	-2.43244551		4.00000000	8.58500000	77.30433218	0.104698
5	-0.25996938	9.00027940	-2.33979706		5.00000000	6.86800000	61.81391892	0.126085
6	-0.24983430	8.99955180	-2.24839672		6.00000000	5.72333333	51.50743480	0.147465
7	-0.24001034	8.99508950	-2.15891449		7.00000000	4.90571429	44.12733906	0.168810
8	-0.22984028	9.00172810	-2.06895971		8.00000000	4.29250000	38.63991787	0.190294
9	-0.22004087	8.99625780	-1.97954439		9.00000000	3.81555556	34.32572143	0.211675
10	-0.20989835	9.00162120	-1.88942544		10.00000000	3.43400000	30.91156720	0.233073
11	-0.20008482	8.99268250	-1.79929926		11.00000000	3.12181818	28.07351973	0.254485
12	-0.18994156	9.00314810	-1.71007200		12.00000000	2.86166667	25.76400881	0.275947
13	-0.18011238	8.98969080	-1.61915461		13.00000000	2.64153846	23.74661401	0.297325
14	-0.16997731	9.00371070	-1.53042652		14.00000000	2.45285714	22.08481610	0.318717
15	-0.16014740	9.00450130	-1.44204747		15.00000000	2.28933333	20.61430498	0.340078
16	-0.15002497	8.99302960	-1.34917900		16.00000000	2.14625000	19.30128978	0.361557
17	-0.13988096	9.00700190	-1.25990807		17.00000000	2.02000000	18.19414384	0.382931
18	-0.13008602	8.99767300	-1.17047147		18.00000000	1.90777778	17.16556060	0.404285
19	-0.11991597	8.99972530	-1.07921079		19.00000000	1.80736842	16.26581931	0.425652
20	-0.11008903	9.00455470	-0.99130269		20.00000000	1.71700000	15.46082042	0.447140
21	-0.09994055	8.99189380	-0.89865484		21.00000000	1.63523810	14.70388729	0.468572
22	-0.09010543	9.01295950	-0.81211658		22.00000000	1.56090909	14.06841042	0.489964
23	-0.07996291	8.99569990	-0.71932233		23.00000000	1.49304348	13.43097107	0.511307
24	-0.07014640	9.01398560	-0.63229861		24.00000000	1.43083333	12.89751106	0.532781
25	-0.06000239	8.98624900	-0.53919639		25.00000000	1.37360000	12.34351163	0.554146
26	-0.04987922	9.00530430	-0.44917755		26.00000000	1.32076923	11.89392883	0.575521
27	-0.04001953	9.00366880	-0.36032260		27.00000000	1.27185185	11.45133284	0.597017
28	-0.02988966	8.99998380	-0.26900649		28.00000000	1.22642857	11.03783727	0.618388
29	-0.02004486	8.99991890	-0.18040214		29.00000000	1.18413793	10.65714535	0.639729
30	-0.00992244	8.99576850	-0.08925997		30.00000000	1.14466667	10.29715634	0.661105
31	-0.00066042	8.99711890	-0.00594190		31.00000000	1.10774194	9.96648590	0.682708
32	0.00947891	8.99680330	0.08527991		32.00000000	1.07312500	9.65469454	0.704085
33	0.01931971	9.01351830	0.17413857		33.00000000	1.04060606	9.37952177	0.725457
34	0.02948650	9.00009250	0.26538125		34.00000000	1.01000000	9.09009343	0.746834
35	0.03930349	9.00086500	0.35376536		35.00000000	0.98114286	8.83113440	0.768325
36	0.04944646	8.99195000	0.44462010		36.00000000	0.95388889	8.57732119	0.789715
37	0.05925749	9.00416090	0.53356397		37.00000000	0.92810811	8.35683474	0.811059
38	0.06940790	9.00107190	0.62474553		38.00000000	0.90368421	8.13412655	0.832427
39	0.07951516	8.99662300	0.71536791		39.00000000	0.88051282	7.92164189	0.853911
40	0.08938944	9.00979520	0.80538057		40.00000000	0.85850000	7.73490918	0.875286
41	0.09948404	8.99129300	0.89449016		41.00000000	0.83756098	7.53075614	0.896651
42	0.10933080	8.99531460	0.98346494		42.00000000	0.81761905	7.35474056	0.918027
43	0.11945517	8.98636250	1.07346746		43.00000000	0.79860465	7.17655089	0.939498
44	0.12929298	9.00642110	1.16446702		44.00000000	0.78045455	7.02910229	0.960881
45	0.13944861	8.99708180	1.25463055		45.00000000	0.76311111	6.86577309	0.982224
46	0.14925517	8.99659820	1.34278879		46.00000000	0.74652174	6.71615613	1.003594
47	0.15942569	9.00825980	1.43614803		47.00000000	0.73063830	6.58177961	1.025085
48	0.16955601	8.99971200	1.52595526		48.00000000	0.71541667	6.43854396	1.046464
49	0.17935066	9.01496220	1.61683942		49.00000000	0.70081633	6.31783269	1.067825
50	0.18952118	8.99514770	1.70477101		50.00000000	0.68680000	6.17786744	1.089203
51	0.19930467	8.99286460	1.79231991		51.00000000	0.67333333	6.05519550	1.110691
52	0.20944764	9.00016120	1.88506252		52.00000000	0.66038462	5.94356799	1.132073
53	0.21925941	8.99510290	1.97226095		53.00000000	0.64792453	5.82814780	1.153463
54	0.22935550	8.98516460	2.06079692		54.00000000	0.63592593	5.71389912	1.174811
55	0.23921715	9.00507930	2.15416941		55.00000000	0.62436364	5.62244406	1.196280
56	0.24937351	8.99573710	2.24329854		56.00000000	0.61321429	5.51631450	1.217657
57	0.25951126	8.98673820	2.33215975		57.00000000	0.60245614	5.41411561	1.239036
58	0.26934165	9.00735860	2.42605683		58.00000000	0.59206897	5.33297749	1.260522
59	0.27949506	8.99901580	2.51518046		59.00000000	0.58203390	5.23773225	1.281890
60	0.28930905	9.00008770	2.60380682		60.00000000	0.57233333	5.15105019	1.303231
61	0.29945576	8.99989220	2.69506956		61.00000000	0.56295082	5.06649669	1.324608
62	0.30927721	9.00276950	2.78435143		62.00000000	0.55387097	4.98637266	1.346090
63	0.31943655	8.99317840	2.87274988		63.00000000	0.54507937	4.90199597	1.367459
64	0.32927066	8.99429800	2.96155844		64.00000000	0.53656250	4.82600302	1.388825
65	0.33937716	8.99025630	3.05108765		65.00000000	0.52830769	4.74962156	1.410207
66	0.34924623	8.99536610	3.14159770		66.00000000	0.52030303	4.68031624	1.431683
67	0.35938028	8.99129100	3.23129268		67.00000000	0.51253731	4.60837213	1.453053
68	0.36955154	9.00312140	3.32711738		68.00000000	0.50500000	4.54657631	1.474404
69	0.37936181	8.99073510	3.41074154		69.00000000	0.49768116	4.47451947	1.495792
70	0.38951001	9.00411130	3.50719148		70.00000000	0.49057143	4.41715974	1.517268
71	0.39932474	8.97706030	3.58476227		71.00000000	0.48366197	4.34186269	1.538647
72	0.40949303	8.99439530	3.68314218		72.00000000	0.47694444	4.28982687	1.560004
73	0.41929886	8.99303150	3.77076786		73.00000000	0.47041096	4.23042057	1.581376
74	0.42944553	8.98606590	3.85902583		74.00000000	0.46405405	4.17002031	1.602857
75	0.43926477	8.98911670	3.94860228		75.00000000	0.45786667	4.11581690	1.624234
76	0.44942710	8.99004080	4.04036797		76.00000000	0.45184211	4.06207896	1.645572
77	0.45955369	8.97012330	4.12225326		77.00000000	0.44597403	4.00044200	1.666945
78	0.46942648	8.98513130	4.21785856		78.00000000	0.44025641	3.95576165	1.688425
79	0.47957096	8.98231890	4.30765930		79.00000000	0.43468354	3.90446622	1.709796
80	0.48937604	8.95518020	4.38245062		80.00000000	0.42925000	3.84401110	1.731173
81	0.49950188	8.94767000	4.46937799		81.00000000	0.42395062	3.79337022	1.752548
82	0.50932038	8.93450450	4.55052523		82.00000000	0.41878049	3.74159615	1.774036
83	0.51945293	8.90284440	4.62460861		83.00000000	0.41373494	3.68341779	1.795422
84	0.52924311	8.86450390	4.69147761		84.00000000	0.40880952	3.62389362	1.816802
85	0.53936452	8.80737880	4.75038764		85.00000000	0.40400000	3.55818104	1.838153
86	0.54953724	8.73206620	4.79859556		86.00000000	0.39930233	3.48673434	1.859624
87	0.55933559	8.60878560	4.81520017		87.00000000	0.39471264	3.39799652	1.881001
88	0.56946373	8.46228500	4.81896438		88.00000000	0.39022727	3.30221440	1.902387
89	0.57928216	8.26404380	4.78721314		89.00000000	0.38584270	3.18862094	1.923872
90	0.58941621	7.96476170	4.69455965		90.00000000	0.38155556	3.03899908	1.945246
91	0.59920269	7.56212090	4.53124319		91.00000000	0.37736264	2.85366189	1.966597
92	0.60931516	7.05258890	4.29724933		92.00000000	0.37326087	2.63245547	1.988081
93	0.61911798	6.37383650	3.94615678		93.00000000	0.36924731	2.35352199	2.009612
94	0.62925279	5.51079990	3.46768621		94.00000000	0.36531915	2.01320073	2.031043
95	0.63934213	4.39656210	2.81090738		95.00000000	0.36147368	1.58924150	2.052389
96	0.64912862	3.06263710	1.98804539		96.00000000	0.35770833	1.09553081	2.073768
97	0.65925598	1.39136530	0.91726589		97.00000000	0.35402062	0.49257200	2.095257
98	0.66898066	-0.55303836	-0.36997197		98.00000000	0.35040816	-0.19378916	2.116629
99	0.67906779	-2.92078110	-1.98340837		99.00000000	0.34686869	-1.01312750	2.137980
100	0.68882525	-5.64620780	-3.88925050		100.00000000	0.34340000	-1.93890776	2.159355
101	0.69909924	-8.91681100	-6.23373579		101.00000000	0.34000000	-3.03171574	2.180831
15:50 02/04/2018
Test Lot:	JK-PERC
Recipe:	Recipe_YJX-LID
Cell Name:	1-20
Test Order:	4
Test Condition:	Light
1	-0.29986009	9.00370880	-2.69985293		1.00000000	34.34000000	309.18736019	0.000000
2	-0.29005694	9.00086210	-2.61076252		2.00000000	17.17000000	154.54480226	0.061788
3	-0.27995384	8.99330900	-2.51771139		3.00000000	11.44666667	102.94341035	0.083218
4	-0.27011794	8.99863430	-2.43069256		4.00000000	8.58500000	77.25327547	0.104721
5	-0.25996646	8.99328900	-2.33795351		5.00000000	6.86800000	61.76590885	0.126111
6	-0.24983135	9.00134940	-2.24881927		6.00000000	5.72333333	51.51772307	0.147456
7	-0.23999992	8.99587540	-2.15900938		7.00000000	4.90571429	44.13119446	0.168832
8	-0.22983652	8.99603560	-2.06761752		8.00000000	4.29250000	38.61548281	0.190327
9	-0.22001924	9.00916480	-1.98218959		9.00000000	3.81555556	34.37496880	0.211701
10	-0.20987073	8.99017430	-1.88677444		10.00000000	3.43400000	30.87225855	0.233101
11	-0.20005789	8.99910830	-1.80034262		11.00000000	3.12181818	28.09357991	0.254478
12	-0.18991832	9.00140760	-1.70953221		12.00000000	2.86166667	25.75902808	0.275963
13	-0.18011965	8.99590870	-1.62033993		13.00000000	2.64153846	23.76303883	0.297355
14	-0.16998006	9.00852010	-1.53126879		14.00000000	2.45285714	22.09661287	0.318744
15	-0.16013822	8.99238400	-1.44002437		15.00000000	2.28933333	20.58656444	0.340141
16	-0.15002172	9.00712680	-1.35126465		16.00000000	2.14625000	19.33154589	0.361618
17	-0.13986948	8.99358080	-1.25792747		17.00000000	2.02000000	18.16703322	0.382989
18	-0.13005443	9.00079350	-1.17059307		18.00000000	1.90777778	17.17151382	0.404381
19	-0.11989625	8.99934010	-1.07898713		19.00000000	1.80736842	16.26512311	0.425865
20	-0.11006854	9.00037960	-0.99065864		20.00000000	1.71700000	15.45365177	0.447314
21	-0.09990068	8.99669460	-0.89877589		21.00000000	1.63523810	14.71173774	0.468702
22	-0.09008413	8.99959560	-0.81072072		22.00000000	1.56090909	14.04755059	0.490089
23	-0.07991776	8.99796960	-0.71909757		23.00000000	1.49304348	13.43435983	0.511434
24	-0.07011089	8.99203870	-0.63043981		24.00000000	1.43083333	12.86610871	0.532923
25	-0.05997355	8.98461910	-0.53883949		25.00000000	1.37360000	12.34127280	0.554307
26	-0.04980942	9.00334170	-0.44845118		26.00000000	1.32076923	11.89133669	0.575701
27	-0.04000105	8.99686810	-0.35988420		27.00000000	1.27185185	11.44268335	0.597074
28	-0.02986892	8.99708840	-0.26873334		28.00000000	1.22642857	11.03428627	0.618549
29	-0.02003377	8.99331860	-0.18017005		29.00000000	1.18413793	10.64932968	0.639923
30	-0.00987633	8.98897170	-0.08877805		30.00000000	1.14466667	10.28937627	0.661310
31	-0.00062619	8.99225900	-0.00563089		31.00000000	1.10774194	9.96110239	0.682788
32	0.00951764	9.00266080	0.08568406		32.00000000	1.07312500	9.66098037	0.704290
33	0.01933763	8.98699570	0.17378716		33.00000000	1.04060606	9.35192219	0.725671
34	0.02946426	9.00124260	0.26521493		34.00000000	1.01000000	9.09125503	0.747059
35	0.03930955	8.99666500	0.35365489		35.00000000	0.98114286	8.82701360	0.768554
36	0.04944958	9.00392910	0.44524053		36.00000000	0.95388889	8.58874792	0.789942
37	0.05923236	8.98864080	0.53241839		37.00000000	0.92810811	8.34243041	0.811281
38	0.06940365	8.99891090	0.62455724		38.00000000	0.90368421	8.13217369	0.832655
39	0.07953996	9.00694850	0.71641228		39.00000000	0.88051282	7.93073363	0.854141
40	0.08938079	8.99137780	0.80365641		40.00000000	0.85850000	7.71909784	0.875509
41	0.09949774	9.00268750	0.89574709		41.00000000	0.83756098	7.54029973	0.896870
42	0.10929689	8.99549960	0.98318013		42.00000000	0.81761905	7.35489182	0.918248
43	0.11945403	8.99739270	1.07477482		43.00000000	0.79860465	7.18535966	0.939721
44	0.12930231	8.98891640	1.16228765		44.00000000	0.78045455	7.01544066	0.961105
45	0.13946021	9.00843720	1.25631854		45.00000000	0.76311111	6.87443852	0.982470
46	0.14925414	8.98507980	1.34106036		46.00000000	0.74652174	6.70755740	1.003858
47	0.15940608	9.00199700	1.43497305		47.00000000	0.73063830	6.57720377	1.025333
48	0.16955951	8.98638150	1.52372644		48.00000000	0.71541667	6.42900710	1.046710
49	0.17938322	8.99281120	1.61315943		49.00000000	0.70081633	6.30230891	1.068068
50	0.18950687	9.00043300	1.70564389		50.00000000	0.68680000	6.18149738	1.089449
51	0.19932909	8.99111560	1.79219089		51.00000000	0.67333333	6.05401784	1.110924
52	0.20947134	9.00150300	1.88555690		52.00000000	0.66038462	5.94445410	1.132320
53	0.21930176	8.99516300	1.97265508		53.00000000	0.64792453	5.82818674	1.153669
54	0.22944254	8.99665640	2.06421570		54.00000000	0.63592593	5.72120705	1.175048
55	0.23927294	9.00574300	2.15483060		55.00000000	0.62436364	5.62285845	1.196526
56	0.24941297	8.99790290	2.24419369		56.00000000	0.61321429	5.51764260	1.217909
57	0.25956714	8.99648090	2.33519082		57.00000000	0.60245614	5.41998516	1.239287
58	0.26937968	8.99641420	2.42345118		58.00000000	0.59206897	5.32649765	1.260656
59	0.27953386	9.00040150	2.51591697		59.00000000	0.58203390	5.23853877	1.282140
60	0.28938213	8.99728870	2.60365457		60.00000000	0.57233333	5.14944823	1.303521
61	0.29949537	8.99340720	2.69348382		61.00000000	0.56295082	5.06284595	1.324899
62	0.30932653	9.00622750	2.78586510		62.00000000	0.55387097	4.98828794	1.346259
63	0.31944793	8.98556330	2.87041960		63.00000000	0.54507937	4.89784514	1.367725
64	0.32927984	9.02004910	2.97012032		64.00000000	0.53656250	4.83982010	1.389099
65	0.33944294	8.97406010	3.04618134		65.00000000	0.52830769	4.74106498	1.410472
66	0.34927335	9.00995060	3.14693563		66.00000000	0.52030303	4.68790460	1.431956
67	0.35943869	9.00284480	3.23597074		67.00000000	0.51253731	4.61429389	1.453330
68	0.36957574	8.99259470	3.32344484		68.00000000	0.50500000	4.54126032	1.474689
69	0.37938604	8.97792340	3.40609881		69.00000000	0.49768116	4.46814333	1.496085
70	0.38952681	8.99840740	3.50512093		70.00000000	0.49057143	4.41436157	1.517567
71	0.39935723	8.98950860	3.59002525		71.00000000	0.48366197	4.34788346	1.538942
72	0.40948090	8.99096870	3.68162996		72.00000000	0.47694444	4.28819257	1.560305
73	0.41928747	8.99124430	3.76991607		73.00000000	0.47041096	4.22957985	1.581679
74	0.42946398	8.99439050	3.86276674		74.00000000	0.46405405	4.17388338	1.603157
75	0.43927652	8.99454880	3.95109410		75.00000000	0.45786667	4.11830408	1.624536
76	0.44945675	8.97566700	4.03417412		76.00000000	0.45184211	4.05558427	1.645877
77	0.45955360	8.98390290	4.12858492		77.00000000	0.44597403	4.00658735	1.667251
78	0.46943313	8.96359440	4.20780818		78.00000000	0.44025641	3.94627989	1.688731
79	0.47957912	8.98633770	4.30965993		79.00000000	0.43468354	3.90621312	1.710107
80	0.48935893	8.94716840	4.37837675		80.00000000	0.42925000	3.84057204	1.731472
81	0.49951681	8.95253660	4.47194252		81.00000000	0.42395062	3.79543342	1.752847
82	0.50931221	8.93108560	4.54871094		82.00000000	0.41878049	3.74016438	1.774336
83	0.51946789	8.90076070	4.62365938		83.00000000	0.41373494	3.68255569	1.795728
84	0.52927971	8.87930770	4.69963740		84.00000000	0.40880952	3.62994555	1.817072
85	0.53939295	8.80448910	4.74907935		85.00000000	0.40400000	3.55701360	1.838438
86	0.54956049	8.73550220	4.80068687		86.00000000	0.39930233	3.48810634	1.859929
87	0.55937898	8.62489510	4.82458502		87.00000000	0.39471264	3.40435515	1.881313
88	0.56950712	8.46922780	4.82328553		88.00000000	0.39022727	3.30492367	1.902677
89	0.57929957	8.25016980	4.77931982		89.00000000	0.38584270	3.18326776	1.924080
90	0.58941579	7.95099740	4.68644341		90.00000000	0.38155556	3.03374723	1.945559
91	0.59921938	7.59295750	4.54984729		91.00000000	0.37736264	2.86529847	1.966948
92	0.60933787	7.06420090	4.30448513		92.00000000	0.37326087	2.63678977	1.988454
93	0.61912137	6.39895300	3.96172855		93.00000000	0.36924731	2.36279619	2.009844
94	0.62926733	5.51478000	3.47027089		94.00000000	0.36531915	2.01465474	2.031331
95	0.63936645	4.42516330	2.82930095		95.00000000	0.36147368	1.59958008	2.052709
96	0.64915890	3.08679220	2.00381863		96.00000000	0.35770833	1.10417129	2.074085
97	0.65927732	1.40321530	0.92510802		97.00000000	0.35402062	0.49676715	2.095584
98	0.66900653	-0.53089035	-0.35516911		98.00000000	0.35040816	-0.18602831	2.116966
99	0.67907584	-2.91834470	-1.98177738		99.00000000	0.34686869	-1.01228239	2.138326
100	0.68882066	-5.63253120	-3.87980386		100.00000000	0.34340000	-1.93421121	2.159714
101	0.69910359	-8.93092060	-6.24363865		101.00000000	0.34000000	-3.03651300	2.181195
