# Supplementary material for: Study on the Electrical Injection Regeneration of Industrialized B-Doped Czochralski Silicon PERC Solar Cells
Source: Hindawi journal article supplement (doi:10.1155/2019/5357370), 2019-06-20
Supplement: f1 [file 5357370.f1.zip › section3.2/IVRawData_1-30-1.5h.csv]

15:54 02/04/2018
Test Lot:	JK-PERC
Recipe:	Recipe_YJX-LID
Cell Name:	1-30-1.5h
Test Order:	2
Test Condition:	Light
1	-0.29988492	9.03121850	-2.70832624		1.00000000	34.34000000	310.13204329	0.000000
2	-0.29009444	9.02478310	-2.61803940		2.00000000	17.17000000	154.95552583	0.061732
3	-0.27997944	9.01861000	-2.52502538		3.00000000	11.44666667	103.23302247	0.083286
4	-0.27011529	9.03120330	-2.43946610		4.00000000	8.58500000	77.53288033	0.104690
5	-0.25997573	9.02027890	-2.34505359		5.00000000	6.86800000	61.95127549	0.126049
6	-0.24982798	9.03644850	-2.25755768		6.00000000	5.72333333	51.71860692	0.147431
7	-0.24001293	9.02386190	-2.16584353		7.00000000	4.90571429	44.26848824	0.168917
8	-0.22987635	9.01353170	-2.07199777		8.00000000	4.29250000	38.69058482	0.190292
9	-0.22004792	9.03902340	-1.98901830		9.00000000	3.81555556	34.48889595	0.211648
10	-0.20988230	9.02112480	-1.89337442		10.00000000	3.43400000	30.97854256	0.233027
11	-0.20007247	9.02516370	-1.80568679		11.00000000	3.12181818	28.17492013	0.254504
12	-0.18990463	9.03566460	-1.71591454		12.00000000	2.86166667	25.85706020	0.275899
13	-0.18014467	9.00776290	-1.62270048		13.00000000	2.64153846	23.79435215	0.297250
14	-0.17002222	9.02035240	-1.53366034		14.00000000	2.45285714	22.12563582	0.318624
15	-0.16021314	9.02376370	-1.44572552		15.00000000	2.28933333	20.65840303	0.340120
16	-0.15007506	9.01950650	-1.35360298		16.00000000	2.14625000	19.35811583	0.361498
17	-0.13987149	9.02898880	-1.26289812		17.00000000	2.02000000	18.23855738	0.382845
18	-0.13006687	9.02021690	-1.17323138		18.00000000	1.90777778	17.20856935	0.404219
19	-0.11992806	9.02667710	-1.08255187		19.00000000	1.80736842	16.31453114	0.425709
20	-0.11011972	9.02027890	-0.99331059		20.00000000	1.71700000	15.48781887	0.447088
21	-0.09993848	9.02944280	-0.90238881		21.00000000	1.63523810	14.76528885	0.468447
22	-0.09012269	9.02736470	-0.81357041		22.00000000	1.56090909	14.09089563	0.489818
23	-0.08001216	9.03702450	-0.72307183		23.00000000	1.49304348	13.49267049	0.511281
24	-0.07018074	9.01165960	-0.63244498		24.00000000	1.43083333	12.89418294	0.532649
25	-0.06003448	9.03202440	-0.54223292		25.00000000	1.37360000	12.40638872	0.554000
26	-0.04987558	9.02757840	-0.45025567		26.00000000	1.32076923	11.92334778	0.575387
27	-0.04005234	9.01846310	-0.36121058		27.00000000	1.27185185	11.47014899	0.596861
28	-0.02992767	9.02539920	-0.27010920		28.00000000	1.22642857	11.06900745	0.618237
29	-0.02006797	9.02306940	-0.18107468		29.00000000	1.18413793	10.68455873	0.639636
30	-0.00994032	9.02021880	-0.08966388		30.00000000	1.14466667	10.32514379	0.660983
31	-0.00066043	9.02699280	-0.00596167		31.00000000	1.10774194	9.99957848	0.682579
32	0.00947892	9.02880380	0.08558334		32.00000000	1.07312500	9.68903508	0.703973
33	0.01930634	9.01500230	0.17404671		33.00000000	1.04060606	9.38106603	0.725358
34	0.02942105	9.02988820	0.26566877		34.00000000	1.01000000	9.12018708	0.746838
35	0.03926707	9.01097010	0.35383443		35.00000000	0.98114286	8.84104895	0.768229
36	0.04941676	9.03355790	0.44640918		36.00000000	0.95388889	8.61701051	0.789582
37	0.05923823	9.02231030	0.53446565		37.00000000	0.92810811	8.37367934	0.810963
38	0.06939610	9.01876540	0.62586715		38.00000000	0.90368421	8.15011589	0.832457
39	0.07952420	9.02212330	0.71747717		39.00000000	0.88051282	7.94409523	0.853833
40	0.08935088	9.02365680	0.80627167		40.00000000	0.85850000	7.74680936	0.875192
41	0.09949610	9.02087780	0.89754212		41.00000000	0.83756098	7.55553521	0.896568
42	0.10930863	9.02030370	0.98599704		42.00000000	0.81761905	7.37517212	0.918051
43	0.11946949	9.02767370	1.07853157		43.00000000	0.79860465	7.20954221	0.939448
44	0.12927532	9.02164270	1.16627575		44.00000000	0.78045455	7.04098205	0.960813
45	0.13942501	9.01454640	1.25685322		45.00000000	0.76311111	6.87910052	0.982187
46	0.14924945	9.02697750	1.34727143		46.00000000	0.74652174	6.73883494	1.003674
47	0.15938500	9.02421280	1.43832416		47.00000000	0.73063830	6.59343548	1.025061
48	0.16951831	9.01272110	1.52782125		48.00000000	0.71541667	6.44785089	1.046409
49	0.17935093	9.03159900	1.61982568		49.00000000	0.70081633	6.32949203	1.067792
50	0.18949765	9.02764700	1.71071789		50.00000000	0.68680000	6.20018796	1.089270
51	0.19926776	9.01883700	1.79716345		51.00000000	0.67333333	6.07268358	1.110650
52	0.20942265	9.02110480	1.88922367		52.00000000	0.66038462	5.95739882	1.131994
53	0.21923965	9.01857850	1.97722999		53.00000000	0.64792453	5.84335822	1.153373
54	0.22939678	9.02215290	2.06965282		54.00000000	0.63592593	5.73742094	1.174859
55	0.23921973	9.01444150	2.15643226		55.00000000	0.62436364	5.62828947	1.196242
56	0.24936645	9.02502060	2.25053735		56.00000000	0.61321429	5.53427156	1.217608
57	0.25949752	9.01818660	2.34019706		57.00000000	0.60245614	5.43306189	1.238970
58	0.26930931	9.02035900	2.42926666		58.00000000	0.59206897	5.34067462	1.260447
59	0.27949697	9.02290440	2.52187444		59.00000000	0.58203390	5.25163622	1.281831
60	0.28929088	9.01992700	2.60938262		60.00000000	0.57233333	5.16240489	1.303224
61	0.29944056	9.02330300	2.70194290		61.00000000	0.56295082	5.07967582	1.324601
62	0.30927172	9.02353190	2.79072323		62.00000000	0.55387097	4.99787235	1.346084
63	0.31943256	9.01864720	2.88084956		63.00000000	0.54507937	4.91587849	1.367478
64	0.32925701	9.01539900	2.96838332		64.00000000	0.53656250	4.83732503	1.388858
65	0.33940744	9.01991560	3.06142646		65.00000000	0.52830769	4.76529080	1.410323
66	0.34922591	9.01023390	3.14660713		66.00000000	0.52030303	4.68805200	1.431694
67	0.35938454	9.02266220	3.24260530		67.00000000	0.51253731	4.62445104	1.453048
68	0.36952457	9.02108860	3.33351389		68.00000000	0.50500000	4.55564974	1.474433
69	0.37935346	9.02137570	3.42229009		69.00000000	0.49768116	4.48976872	1.495913
70	0.38948604	9.02571960	3.51539179		70.00000000	0.49057143	4.42776016	1.517286
71	0.39929855	9.01412960	3.59932888		71.00000000	0.48366197	4.35979170	1.538643
72	0.40945047	9.01342680	3.69055184		72.00000000	0.47694444	4.29890384	1.560020
73	0.41928461	9.01582340	3.78019600		73.00000000	0.47041096	4.24114213	1.581514
74	0.42942610	9.01711180	3.87218315		74.00000000	0.46405405	4.18442729	1.602892
75	0.43926245	9.00288490	3.95462928		75.00000000	0.45786667	4.12212090	1.624230
76	0.44941065	9.01335810	4.05069912		76.00000000	0.45184211	4.07261470	1.645605
77	0.45954397	9.00150110	4.13658555		77.00000000	0.44597403	4.01443569	1.667091
78	0.46939668	8.99526980	4.22234978		78.00000000	0.44025641	3.96022519	1.688478
79	0.47953373	8.99967000	4.31564532		79.00000000	0.43468354	3.91200845	1.709890
80	0.48935816	8.98392110	4.39635510		80.00000000	0.42925000	3.85634813	1.731266
81	0.49947286	8.96838280	4.47946381		81.00000000	0.42395062	3.80215142	1.752748
82	0.50931519	8.95086100	4.55880947		82.00000000	0.41878049	3.74844594	1.774137
83	0.51944107	8.91383930	4.63021422		83.00000000	0.41373494	3.68796677	1.795485
84	0.52923423	8.89224910	4.70608261		84.00000000	0.40880952	3.63523612	1.816853
85	0.53936380	8.82876590	4.76191673		85.00000000	0.40400000	3.56682142	1.838333
86	0.54950011	8.75198360	4.80921595		86.00000000	0.39930233	3.49468740	1.859700
87	0.55934614	8.65281200	4.83991699		87.00000000	0.39471264	3.41537430	1.881057
88	0.56946754	8.52071860	4.85227266		88.00000000	0.39022727	3.32501678	1.902431
89	0.57927561	8.31516740	4.81677367		89.00000000	0.38584270	3.20834661	1.923903
90	0.58938289	8.05065250	4.74491684		90.00000000	0.38155556	3.07177119	1.945286
91	0.59918350	7.66963820	4.59552066		91.00000000	0.37736264	2.89423490	1.966682
92	0.60931009	7.18938730	4.38056622		92.00000000	0.37326087	2.68351696	1.988145
93	0.61910927	6.53723290	4.04726149		93.00000000	0.36924731	2.41385568	2.009655
94	0.62922770	5.69139770	3.58118508		94.00000000	0.36531915	2.07917656	2.031041
95	0.63936919	4.59465410	2.93768027		95.00000000	0.36147368	1.66084655	2.052423
96	0.64914227	3.27040860	2.12296046		96.00000000	0.35770833	1.16985241	2.073956
97	0.65923834	1.58963380	1.04794755		97.00000000	0.35402062	0.56276314	2.095330
98	0.66902411	-0.39339837	-0.26319299		98.00000000	0.35040816	-0.13785000	2.116683
99	0.67904651	-2.81527190	-1.91170056		99.00000000	0.34686869	-0.97652967	2.138061
100	0.68879652	-5.61344390	-3.86652062		100.00000000	0.34340000	-1.92765664	2.159543
101	0.69907349	-8.98919490	-6.28410785		101.00000000	0.34000000	-3.05632627	2.180923
15:54 02/04/2018
Test Lot:	JK-PERC
Recipe:	Recipe_YJX-LID
Cell Name:	1-30-1.5h
Test Order:	3
Test Condition:	Light
1	-0.29995713	9.02159880	-2.70609288		1.00000000	34.34000000	309.80170279	0.000000
2	-0.29004160	9.02800940	-2.61849829		2.00000000	17.17000000	155.01092140	0.021575
3	-0.27994522	9.02177240	-2.52560206		3.00000000	11.44666667	103.26922141	0.042971
4	-0.27014655	9.01818660	-2.43623200		4.00000000	8.58500000	77.42113196	0.064363
5	-0.25998837	9.02356340	-2.34602154		5.00000000	6.86800000	61.97383343	0.085744
6	-0.24985775	9.02360820	-2.25461844		6.00000000	5.72333333	51.64511760	0.107248
7	-0.24000549	9.03781220	-2.16912455		7.00000000	4.90571429	44.33692442	0.128616
8	-0.22985700	9.02377220	-2.07417721		8.00000000	4.29250000	38.73454217	0.150013
9	-0.22002782	9.03335090	-1.98758851		9.00000000	3.81555556	34.46725221	0.171397
10	-0.20989719	9.01408770	-1.89203168		10.00000000	3.43400000	30.95437716	0.192868
11	-0.20003973	9.02247330	-1.80485312		11.00000000	3.12181818	28.16652119	0.214257
12	-0.18993738	9.02716160	-1.71459542		12.00000000	2.86166667	25.83272745	0.235698
13	-0.18011788	9.03101160	-1.62664666		13.00000000	2.64153846	23.85576449	0.257059
14	-0.16998203	9.01931290	-1.53312112		14.00000000	2.45285714	22.12308607	0.278550
15	-0.16015731	9.02377700	-1.44522385		15.00000000	2.28933333	20.65843348	0.299922
16	-0.15001255	9.01594160	-1.35250439		16.00000000	2.14625000	19.35046466	0.321315
17	-0.13989010	9.02706150	-1.26279654		17.00000000	2.02000000	18.23466423	0.342777
18	-0.13004455	9.01827810	-1.17277792		18.00000000	1.90777778	17.20487055	0.364222
19	-0.11990573	9.02138230	-1.08171543		19.00000000	1.80736842	16.30496148	0.385602
20	-0.11012716	9.02527900	-0.99392834		20.00000000	1.71700000	15.49640404	0.406975
21	-0.09990871	9.02484320	-0.90166044		21.00000000	1.63523810	14.75776740	0.428318
22	-0.09013758	9.01358510	-0.81246274		22.00000000	1.56090909	14.06938692	0.449805
23	-0.07996099	9.01901250	-0.72116914		23.00000000	1.49304348	13.46577779	0.471202
24	-0.07012005	9.02632240	-0.63292620		24.00000000	1.43083333	12.91516297	0.532898
25	-0.05998363	9.00702000	-0.54027376		25.00000000	1.37360000	12.37204267	0.554273
26	-0.04982562	9.02398300	-0.44962558		26.00000000	1.32076923	11.91859909	0.575668
27	-0.04000701	9.01465030	-0.36064924		27.00000000	1.27185185	11.46529968	0.597027
28	-0.02987060	9.02267070	-0.26951255		28.00000000	1.22642857	11.06566114	0.618498
29	-0.02004603	9.02486710	-0.18091277		29.00000000	1.18413793	10.68668746	0.639871
30	-0.00991259	9.02343850	-0.08944564		30.00000000	1.14466667	10.32882927	0.661245
31	-0.00065219	9.02256390	-0.00588446		31.00000000	1.10774194	9.99467240	0.682773
32	0.00949965	9.02685170	0.08575191		32.00000000	1.07312500	9.68694023	0.704239
33	0.01933063	9.02069000	0.17437562		33.00000000	1.04060606	9.38698468	0.725623
34	0.02948983	9.01490590	0.26584806		34.00000000	1.01000000	9.10505496	0.747011
35	0.03931709	9.02451320	0.35481763		35.00000000	0.98114286	8.85433667	0.768497
36	0.04945323	9.01449680	0.44579594		36.00000000	0.95388889	8.59882834	0.789869
37	0.05929983	9.01868920	0.53480677		37.00000000	0.92810811	8.37031857	0.811234
38	0.06942480	9.01494220	0.62586057		38.00000000	0.90368421	8.14666092	0.832613
39	0.07953563	9.01556490	0.71705860		39.00000000	0.88051282	7.93832048	0.854093
40	0.08940531	9.02594380	0.80696733		40.00000000	0.85850000	7.74877275	0.875477
41	0.09952655	9.01337720	0.89707037		41.00000000	0.83756098	7.54925300	0.896823
42	0.10934042	9.03022580	0.98736868		42.00000000	0.81761905	7.38328462	0.918196
43	0.11950186	9.01706890	1.07755651		43.00000000	0.79860465	7.20107316	0.939661
44	0.12932912	9.02050780	1.16661434		44.00000000	0.78045455	7.04009631	0.961034
45	0.13947269	9.02311990	1.25847880		45.00000000	0.76311111	6.88564305	0.982399
46	0.14929251	9.02157310	1.34685329		46.00000000	0.74652174	6.73480044	1.003773
47	0.15945618	9.01548960	1.43757553		47.00000000	0.73063830	6.58706198	1.025250
48	0.16958562	9.02997880	1.53135455		48.00000000	0.71541667	6.46019733	1.046641
49	0.17939128	9.01793000	1.61773801		49.00000000	0.70081633	6.31991258	1.067997
50	0.18955272	9.02064800	1.70988836		50.00000000	0.68680000	6.19538105	1.089371
51	0.19932118	9.02255440	1.79838619		51.00000000	0.67333333	6.07518663	1.110860
52	0.20945658	9.01261620	1.88775177		52.00000000	0.66038462	5.95179308	1.132251
53	0.21927936	9.03821470	1.98189393		53.00000000	0.64792453	5.85608100	1.153598
54	0.22943932	9.01982690	2.06950295		54.00000000	0.63592593	5.73594177	1.174975
55	0.23925467	9.02302460	2.15880077		55.00000000	0.62436364	5.63364845	1.196456
56	0.24939154	9.01692870	2.24874573		56.00000000	0.61321429	5.52930949	1.217833
57	0.25953436	9.02315520	2.34181881		57.00000000	0.60245614	5.43605526	1.239265
58	0.26937875	9.01595210	2.42870591		58.00000000	0.59206897	5.33806543	1.260622
59	0.27953273	9.01504610	2.52000045		59.00000000	0.58203390	5.24706242	1.282088
60	0.28934735	9.00768470	2.60634970		60.00000000	0.57233333	5.15539821	1.303467
61	0.29948497	9.01768970	2.70066253		61.00000000	0.56295082	5.07651581	1.324846
62	0.30930406	9.02039430	2.79004458		62.00000000	0.55387097	4.99613452	1.346213
63	0.31945208	9.00032140	2.87517139		63.00000000	0.54507937	4.90588947	1.367691
64	0.32928008	9.02097030	2.97042582		64.00000000	0.53656250	4.84031438	1.389063
65	0.33942515	9.02186300	3.06224720		65.00000000	0.52830769	4.76631962	1.410454
66	0.34924498	9.00318050	3.14431559		66.00000000	0.52030303	4.68438210	1.431934
67	0.35938704	9.01484390	3.23981807		67.00000000	0.51253731	4.62044387	1.453312
68	0.36957082	9.01266960	3.33081969		68.00000000	0.50500000	4.55139815	1.474683
69	0.37940180	9.02554510	3.42430806		69.00000000	0.49768116	4.49184375	1.496066
70	0.38952303	8.99079040	3.50211992		70.00000000	0.49057143	4.41062489	1.517536
71	0.39935625	9.03009410	3.60622452		71.00000000	0.48366197	4.36751312	1.538921
72	0.40949386	9.01418970	3.69125534		72.00000000	0.47694444	4.29926770	1.560272
73	0.41931370	9.01370720	3.77957092		73.00000000	0.47041096	4.24014665	1.581653
74	0.42944238	9.01779460	3.87262318		74.00000000	0.46405405	4.18474414	1.603135
75	0.43928528	9.00557800	3.95601785		75.00000000	0.45786667	4.12335398	1.624500
76	0.44944522	9.01044850	4.04970301		76.00000000	0.45184211	4.07130002	1.645853
77	0.45959476	8.98966880	4.13160467		77.00000000	0.44597403	4.00915879	1.667236
78	0.46944061	9.00779630	4.22862539		78.00000000	0.44025641	3.96574006	1.688708
79	0.47958568	8.97494320	4.30425424		79.00000000	0.43468354	3.90126012	1.710088
80	0.48939434	8.99113750	4.40021180		80.00000000	0.42925000	3.85944577	1.731455
81	0.49954310	8.95970250	4.47575756		81.00000000	0.42395062	3.79847141	1.752830
82	0.50933611	8.95056720	4.55884708		82.00000000	0.41878049	3.74832290	1.774321
83	0.51948196	8.91301440	4.63015019		83.00000000	0.41373494	3.68762548	1.795693
84	0.52926826	8.89541240	4.70805944		84.00000000	0.40880952	3.63652931	1.817038
85	0.53939921	8.82023140	4.75762585		85.00000000	0.40400000	3.56337349	1.838432
86	0.54956061	8.76310920	4.81585964		86.00000000	0.39930233	3.49912988	1.859907
87	0.55937004	8.66552350	4.84723423		87.00000000	0.39471264	3.42039169	1.881287
88	0.56948459	8.49922660	4.84017858		88.00000000	0.39022727	3.31663002	1.902647
89	0.57929772	8.30546860	4.81133902		89.00000000	0.38584270	3.20460440	1.924009
90	0.58942562	8.03035930	4.73329951		90.00000000	0.38155556	3.06402820	1.945480
91	0.59924024	7.66955850	4.59590808		91.00000000	0.37736264	2.89420482	1.966858
92	0.60937339	7.15777540	4.36175786		92.00000000	0.37326087	2.67171747	1.988346
93	0.61912400	6.53016090	4.04297934		93.00000000	0.36924731	2.41124436	2.009739
94	0.62925863	5.66796970	3.56661885		94.00000000	0.36531915	2.07061787	2.031239
95	0.63937914	4.57185750	2.92315032		95.00000000	0.36147368	1.65260617	2.052624
96	0.64917588	3.25583720	2.11361098		96.00000000	0.35770833	1.16464010	2.074016
97	0.65927929	1.55058550	1.02226891		97.00000000	0.35402062	0.54893924	2.095513
98	0.66902167	-0.39379054	-0.26345440		98.00000000	0.35040816	-0.13798742	2.116890
99	0.67907369	-2.81080630	-1.90874461		99.00000000	0.34686869	-0.97498069	2.138250
100	0.68880421	-5.57857080	-3.84254305		100.00000000	0.34340000	-1.91568121	2.159624
101	0.69909590	-8.92192460	-6.23728091		101.00000000	0.34000000	-3.03345436	2.181096
15:54 02/04/2018
Test Lot:	JK-PERC
Recipe:	Recipe_YJX-LID
Cell Name:	1-30-1.5h
Test Order:	4
Test Condition:	Light
1	-0.29988310	9.03792290	-2.71032034		1.00000000	34.34000000	310.36227239	0.000000
2	-0.29002878	9.00414850	-2.61146220		2.00000000	17.17000000	154.60122975	0.021587
3	-0.27992287	9.02165320	-2.52536706		3.00000000	11.44666667	103.26785696	0.042997
4	-0.27009755	9.03372380	-2.43998667		4.00000000	8.58500000	77.55451882	0.064346
5	-0.25995445	9.02987190	-2.34735538		5.00000000	6.86800000	62.01716021	0.085728
6	-0.24984482	9.02487750	-2.25481889		6.00000000	5.72333333	51.65238223	0.107224
7	-0.24001803	9.02360730	-2.16582845		7.00000000	4.90571429	44.26723924	0.128607
8	-0.22985332	9.02289300	-2.07394191		8.00000000	4.29250000	38.73076820	0.149970
9	-0.22003098	9.03172490	-1.98725928		9.00000000	3.81555556	34.46104812	0.171344
10	-0.20988935	9.01942630	-1.89308152		10.00000000	3.43400000	30.97270991	0.192911
11	-0.20005214	9.02092840	-1.80465603		11.00000000	3.12181818	28.16169830	0.214308
12	-0.18990605	9.02731510	-1.71434175		12.00000000	2.86166667	25.83316671	0.235659
13	-0.18013209	9.02516080	-1.62572108		13.00000000	2.64153846	23.84030937	0.257031
14	-0.16995920	9.01725580	-1.53256558		14.00000000	2.45285714	22.11804030	0.278523
15	-0.16019046	9.02513120	-1.44573992		15.00000000	2.28933333	20.66153369	0.299896
16	-0.15003172	9.02760220	-1.35442669		16.00000000	2.14625000	19.37549122	0.321244
17	-0.13986179	9.02169990	-1.26179110		17.00000000	2.02000000	18.22383380	0.342627
18	-0.13005808	9.00948720	-1.17175661		18.00000000	1.90777778	17.18809947	0.364115
19	-0.11993208	9.02003380	-1.08179142		19.00000000	1.80736842	16.30252425	0.385514
20	-0.11005541	9.00782970	-0.99136039		20.00000000	1.71700000	15.46644359	0.406865
21	-0.09990485	9.01426120	-0.90056841		21.00000000	1.63523810	14.74046331	0.428236
22	-0.09006763	9.02776910	-0.81310979		22.00000000	1.56090909	14.09152686	0.449722
23	-0.07992526	9.01305010	-0.72037038		23.00000000	1.49304348	13.45687567	0.471099
24	-0.07009847	9.02906800	-0.63292383		24.00000000	1.43083333	12.91909146	0.492446
25	-0.05996279	9.00829700	-0.54016259		25.00000000	1.37360000	12.37379676	0.513823
26	-0.04982637	9.02499100	-0.44968253		26.00000000	1.32076923	11.91993042	0.535299
27	-0.03998841	9.03289320	-0.36121104		27.00000000	1.27185185	11.48850194	0.556673
28	-0.02985869	9.01678850	-0.26922947		28.00000000	1.22642857	11.05844704	0.578059
29	-0.02000882	9.01974680	-0.18047446		29.00000000	1.18413793	10.68062431	0.599420
30	-0.00986123	9.03745560	-0.08912046		30.00000000	1.14466667	10.34487418	0.620892
31	-0.00062391	9.01862430	-0.00562682		31.00000000	1.10774194	9.99030834	0.642388
32	0.00950709	9.01760100	0.08573114		32.00000000	1.07312500	9.67701307	0.663774
33	0.01933063	9.02414990	0.17444250		33.00000000	1.04060606	9.39058508	0.685199
34	0.02948239	9.01874070	0.26589404		34.00000000	1.01000000	9.10892811	0.706680
35	0.03932454	9.02342510	0.35484201		35.00000000	0.98114286	8.85326908	0.728052
36	0.04947406	9.01634120	0.44607504		36.00000000	0.95388889	8.60058769	0.749459
37	0.05926634	9.02413460	0.53482747		37.00000000	0.92810811	8.37537249	0.770811
38	0.06939280	9.02220340	0.62607596		38.00000000	0.90368421	8.15322276	0.792296
39	0.07955721	9.02601340	0.71808444		39.00000000	0.88051282	7.94752052	0.813682
40	0.08936884	9.01180170	0.80537429		40.00000000	0.85850000	7.73663176	0.835055
41	0.09952655	9.03335000	0.89905820		41.00000000	0.83756098	7.56598144	0.856420
42	0.10933149	9.00806520	0.98486519		42.00000000	0.81761905	7.36516569	0.877895
43	0.11947432	9.02090360	1.07776632		43.00000000	0.79860465	7.20413557	0.899274
44	0.12931199	9.01490590	1.16573542		44.00000000	0.78045455	7.03572429	0.920653
45	0.13946524	9.01129910	1.25676299		45.00000000	0.76311111	6.87662247	0.942010
46	0.14928953	9.01825520	1.34633108		46.00000000	0.74652174	6.73232356	0.963490
47	0.15942119	9.02008060	1.43799198		47.00000000	0.73063830	6.59041634	0.984861
48	0.16956849	9.02053830	1.52959906		48.00000000	0.71541667	6.45344344	1.006242
49	0.17938161	9.02173810	1.61833391		49.00000000	0.70081633	6.32258135	1.027713
50	0.18954082	9.00969700	1.70770536		50.00000000	0.68680000	6.18785990	1.049097
51	0.19931896	9.01824000	1.79750622		51.00000000	0.67333333	6.07228160	1.070458
52	0.20946550	9.02149770	1.88969253		52.00000000	0.66038462	5.95765829	1.091832
53	0.21927713	9.01338390	1.97642895		53.00000000	0.64792453	5.83999251	1.113316
54	0.22944081	9.03093050	2.07206401		54.00000000	0.63592593	5.74300284	1.134684
55	0.23927030	9.01827340	2.15780498		55.00000000	0.62436364	5.63068197	1.156021
56	0.24942578	9.02200320	2.25032019		56.00000000	0.61321429	5.53242125	1.177406
57	0.25957307	9.02026940	2.34141902		57.00000000	0.60245614	5.43431669	1.198894
58	0.26938397	9.00557140	2.42595658		58.00000000	0.59206897	5.33191934	1.220266
59	0.27954093	9.02776910	2.52363097		59.00000000	0.58203390	5.25446764	1.241625
60	0.28936142	9.00526910	2.60577745		60.00000000	0.57233333	5.15401568	1.262996
61	0.29950446	9.02776620	2.70385624		61.00000000	0.56295082	5.08218838	1.324674
62	0.30932522	9.00850300	2.78655717		62.00000000	0.55387097	4.98954827	1.346124
63	0.31947497	9.01206400	2.87912888		63.00000000	0.54507937	4.91229012	1.367619
64	0.32931286	9.02211760	2.97109935		64.00000000	0.53656250	4.84092997	1.389000
65	0.33945289	9.01512810	3.06021129		65.00000000	0.52830769	4.76276152	1.410353
66	0.34927443	9.02226450	3.15124629		66.00000000	0.52030303	4.69431156	1.431727
67	0.35942787	9.01132010	3.23891959		67.00000000	0.51253731	4.61863779	1.453221
68	0.36958504	9.01877980	3.33320609		68.00000000	0.50500000	4.55448380	1.474614
69	0.37939316	9.00926880	3.41805496		69.00000000	0.49768116	4.48374334	1.495967
70	0.38953993	9.01145650	3.51032213		70.00000000	0.49057143	4.42076309	1.517337
71	0.39937779	9.03440380	3.60814022		71.00000000	0.48366197	4.36959756	1.538806
72	0.40949479	8.99555780	3.68363405		72.00000000	0.47694444	4.29038132	1.560180
73	0.41931033	9.02771950	3.78541604		73.00000000	0.47041096	4.24673819	1.581549
74	0.42948687	9.01244160	3.87072533		74.00000000	0.46405405	4.18226006	1.602921
75	0.43930689	9.01486780	3.96029354		75.00000000	0.45786667	4.12760747	1.624413
76	0.44945216	9.01674840	4.05259704		76.00000000	0.45184211	4.07414658	1.645795
77	0.45959148	8.99047950	4.13194778		77.00000000	0.44597403	4.00952034	1.667183
78	0.46945170	9.00209810	4.22605026		78.00000000	0.44025641	3.96323139	1.688524
79	0.47960067	8.98140240	4.30748661		79.00000000	0.43468354	3.90406783	1.709998
80	0.48937529	8.97945020	4.39432105		80.00000000	0.42925000	3.85442900	1.731372
81	0.49952877	8.97993760	4.48573718		81.00000000	0.42395062	3.80705009	1.752745
82	0.50934803	8.94618130	4.55671982		82.00000000	0.41878049	3.74648617	1.774234
83	0.51946950	8.92952630	4.63861656		83.00000000	0.41373494	3.69445703	1.795618
84	0.52924711	8.88591100	4.70284272		84.00000000	0.40880952	3.63264504	1.816967
85	0.53940052	8.84274770	4.76978271		85.00000000	0.40400000	3.57247007	1.838342
86	0.54957187	8.76028160	4.81440434		86.00000000	0.39930233	3.49800082	1.859820
87	0.55940604	8.66552930	4.84754943		87.00000000	0.39471264	3.42039398	1.881195
88	0.56951779	8.50177670	4.84191308		88.00000000	0.39022727	3.31762513	1.902569
89	0.57930732	8.32889750	4.82499129		89.00000000	0.38584270	3.21364427	1.923945
90	0.58945626	8.04014970	4.73931657		90.00000000	0.38155556	3.06776379	1.945417
91	0.59926069	7.67561820	4.59969626		91.00000000	0.37736264	2.89649153	1.966810
92	0.60937095	7.17256830	4.37075476		92.00000000	0.37326087	2.67723908	1.988279
93	0.61915827	6.54296260	4.05112940		93.00000000	0.36924731	2.41597135	2.009679
94	0.62928414	5.67383480	3.57045425		94.00000000	0.36531915	2.07276050	2.031174
95	0.63940114	4.59333320	2.93698248		95.00000000	0.36147368	1.66036907	2.052560
96	0.64920032	3.24897000	2.10923236		96.00000000	0.35770833	1.16218364	2.073931
97	0.65933073	1.55746050	1.02688157		97.00000000	0.35402062	0.55137313	2.095315
98	0.66904056	-0.42248520	-0.28265973		98.00000000	0.35040816	-0.14804226	2.116803
99	0.67909282	-2.86912080	-1.94839933		99.00000000	0.34686869	-0.99520816	2.138191
100	0.68885255	-5.66399340	-3.90165630		100.00000000	0.34340000	-1.94501533	2.159542
101	0.69914222	-9.06825830	-6.34000224		101.00000000	0.34000000	-3.08320782	2.180919
