# Supplementary material for: Study on the Electrical Injection Regeneration of Industrialized B-Doped Czochralski Silicon PERC Solar Cells
Source: Hindawi journal article supplement (doi:10.1155/2019/5357370), 2019-06-20
Supplement: f1 [file 5357370.f1.zip › section3.2/IVRawData_1-30-2.5h.csv]

17:33 02/04/2018
Test Lot:	JK-PERC
Recipe:	Recipe_YJX-LID
Cell Name:	1-30-2.5h
Test Order:	2
Test Condition:	Light
1	-0.29994699	9.01803680	-2.70493299		1.00000000	34.34000000	309.67938371	0.000000
2	-0.29012841	9.02400970	-2.61812159		2.00000000	17.17000000	154.94224655	0.061730
3	-0.27999127	9.02516270	-2.52696677		3.00000000	11.44666667	103.30802904	0.083101
4	-0.27020171	9.02116780	-2.43753497		4.00000000	8.58500000	77.44672556	0.104614
5	-0.26003554	9.01346870	-2.34382220		5.00000000	6.86800000	61.90450303	0.125989
6	-0.24986269	9.04128740	-2.25908039		6.00000000	5.72333333	51.74630155	0.147420
7	-0.24006644	9.01970860	-2.16532933		7.00000000	4.90571429	44.24811333	0.168824
8	-0.22988540	9.02674480	-2.07511684		8.00000000	4.29250000	38.74730205	0.190326
9	-0.22008245	9.01964860	-1.98506636		9.00000000	3.81555556	34.41497032	0.211715
10	-0.20995423	9.02771950	-1.89540790		10.00000000	3.43400000	31.00118876	0.233103
11	-0.20010217	9.02108100	-1.80513788		11.00000000	3.12181818	28.16217469	0.254505
12	-0.18999109	9.02284810	-1.71426075		12.00000000	2.86166667	25.82038365	0.275969
13	-0.18016505	9.02990440	-1.62687318		13.00000000	2.64153846	23.85283978	0.297338
14	-0.17002942	9.00931170	-1.53184804		14.00000000	2.45285714	22.09855456	0.318696
15	-0.16021529	9.02431960	-1.44583398		15.00000000	2.28933333	20.65967567	0.340065
16	-0.15005063	9.01076700	-1.35207127		16.00000000	2.14625000	19.33935867	0.361561
17	-0.13994326	9.02896120	-1.26354226		17.00000000	2.02000000	18.23850162	0.382940
18	-0.13007779	9.02133750	-1.17347564		18.00000000	1.90777778	17.21070721	0.404321
19	-0.11991014	9.02618220	-1.08233077		19.00000000	1.80736842	16.31363667	0.425674
20	-0.11008412	9.03060820	-0.99412656		20.00000000	1.71700000	15.50555428	0.447156
21	-0.09995070	9.03035260	-0.90259007		21.00000000	1.63523810	14.76677658	0.468551
22	-0.09016040	9.01872920	-0.81313223		22.00000000	1.56090909	14.07741640	0.489938
23	-0.07998829	9.01979730	-0.72147813		23.00000000	1.49304348	13.46694953	0.511296
24	-0.07016449	9.03912450	-0.63422560		24.00000000	1.43083333	12.93348064	0.532772
25	-0.06000206	9.02119060	-0.54128997		25.00000000	1.37360000	12.39150741	0.554151
26	-0.04985897	9.03384400	-0.45041815		26.00000000	1.32076923	11.93162319	0.575545
27	-0.04008579	9.01953510	-0.36155518		27.00000000	1.27185185	11.47151242	0.597024
28	-0.02989209	9.02556320	-0.26979292		28.00000000	1.22642857	11.06920858	0.618402
29	-0.02008616	9.02303500	-0.18123811		29.00000000	1.18413793	10.68451800	0.639758
30	-0.00991702	9.03026580	-0.08955333		30.00000000	1.14466667	10.33664425	0.661136
31	-0.00068791	9.01870060	-0.00620406		31.00000000	1.10774194	9.99039286	0.682734
32	0.00948549	9.04213050	0.08576899		32.00000000	1.07312500	9.70333629	0.704130
33	0.01932909	9.01518820	0.17425540		33.00000000	1.04060606	9.38125948	0.725496
34	0.02942351	9.03135590	0.26573423		34.00000000	1.01000000	9.12166946	0.746873
35	0.03925744	9.01684000	0.35397809		35.00000000	0.98114286	8.84680816	0.768376
36	0.04939727	9.02391910	0.44575694		36.00000000	0.95388889	8.60781616	0.789751
37	0.05923566	9.00994300	0.53370994		37.00000000	0.92810811	8.36220115	0.811115
38	0.06938442	9.02950380	0.62650687		38.00000000	0.90368421	8.15982001	0.832497
39	0.07951680	9.01511100	0.71685276		39.00000000	0.88051282	7.93792081	0.853970
40	0.08933138	9.01818370	0.80560680		40.00000000	0.85850000	7.74211071	0.875365
41	0.09949725	9.02869420	0.89833025		41.00000000	0.83756098	7.56208192	0.896712
42	0.10927313	9.01534460	0.98513492		42.00000000	0.81761905	7.37111747	0.918088
43	0.11946728	9.02228070	1.07786733		43.00000000	0.79860465	7.20523533	0.939567
44	0.12930121	9.02794460	1.16732416		44.00000000	0.78045455	7.04590040	0.960948
45	0.13943657	9.02397440	1.25827204		45.00000000	0.76311111	6.88629513	0.982305
46	0.14924742	9.02259450	1.34659895		46.00000000	0.74652174	6.73556294	1.003688
47	0.15937907	9.02048680	1.43767680		47.00000000	0.73063830	6.59071312	1.025166
48	0.16952856	9.01900770	1.52897939		48.00000000	0.71541667	6.45234843	1.046536
49	0.17938779	9.01854710	1.61781723		49.00000000	0.70081633	6.32034505	1.067896
50	0.18954325	9.02526760	1.71067855		50.00000000	0.68680000	6.19855379	1.089267
51	0.19928043	9.02500920	1.79850771		51.00000000	0.67333333	6.07683953	1.110741
52	0.20945151	9.01331230	1.88785187		52.00000000	0.66038462	5.95225278	1.132107
53	0.21927799	9.02441980	1.97885663		53.00000000	0.64792453	5.84714294	1.153482
54	0.22940740	9.01905630	2.06903826		54.00000000	0.63592593	5.73545173	1.174845
55	0.23924877	9.02094080	2.15824899		55.00000000	0.62436364	5.63234740	1.196328
56	0.24938859	9.02738570	2.25132699		56.00000000	0.61321429	5.53572187	1.217730
57	0.25955597	9.01786990	2.34064197		57.00000000	0.60245614	5.43287109	1.239121
58	0.26937947	9.02690980	2.43166418		58.00000000	0.59206897	5.34455315	1.260612
59	0.27950886	9.01490400	2.51974554		59.00000000	0.58203390	5.24697972	1.281982
60	0.28935024	9.01793480	2.60934160		60.00000000	0.57233333	5.16126468	1.303382
61	0.29948708	9.01349070	2.69942401		61.00000000	0.56295082	5.07415198	1.324757
62	0.30931208	9.01747610	2.78921429		62.00000000	0.55387097	4.99451821	1.346233
63	0.31945264	9.02210900	2.88213654		63.00000000	0.54507937	4.91776545	1.367631
64	0.32926872	9.03183650	2.97390124		64.00000000	0.53656250	4.84614477	1.388974
65	0.33938250	9.01777460	3.06047489		65.00000000	0.52830769	4.76415969	1.410360
66	0.34921271	9.01776790	3.14911917		66.00000000	0.52030303	4.69197196	1.431849
67	0.35939792	9.01868720	3.24129742		67.00000000	0.51253731	4.62241371	1.453227
68	0.36954519	9.01263140	3.33057458		68.00000000	0.50500000	4.55137886	1.474592
69	0.37935606	9.02054020	3.42199659		69.00000000	0.49768116	4.48935291	1.495967
70	0.38950184	9.02326010	3.51457641		70.00000000	0.49057143	4.42655360	1.517445
71	0.39934319	9.02013300	3.60212869		71.00000000	0.48366197	4.36269531	1.538835
72	0.40945175	9.01239780	3.69014205		72.00000000	0.47694444	4.29841306	1.560189
73	0.41931248	9.01370910	3.77956072		73.00000000	0.47041096	4.24014754	1.581566
74	0.42943594	9.01265140	3.87035643		74.00000000	0.46405405	4.18235742	1.603044
75	0.43925497	9.01302340	3.95901532		75.00000000	0.45786667	4.12676298	1.624414
76	0.44941863	9.00994110	4.04923539		76.00000000	0.45184211	4.07107075	1.645754
77	0.45955101	9.00679020	4.13907953		77.00000000	0.44597403	4.01679449	1.667134
78	0.46940875	8.99578760	4.22270141		78.00000000	0.44025641	3.96045316	1.688610
79	0.47954336	8.98128510	4.30691563		79.00000000	0.43468354	3.90401684	1.709998
80	0.48937282	8.97872640	4.39394466		80.00000000	0.42925000	3.85411831	1.731371
81	0.49950519	8.96036240	4.47574752		81.00000000	0.42395062	3.79875117	1.752734
82	0.50932944	8.94628720	4.55660745		82.00000000	0.41878049	3.74653052	1.774210
83	0.51946330	8.91758540	4.63235834		83.00000000	0.41373494	3.68951666	1.795585
84	0.52922207	8.88929650	4.70441189		84.00000000	0.40880952	3.63402907	1.816967
85	0.53938645	8.82640170	4.76084148		85.00000000	0.40400000	3.56586629	1.838321
86	0.54954714	8.75888250	4.81341883		86.00000000	0.39930233	3.49744215	1.859794
87	0.55936170	8.64747430	4.83706593		87.00000000	0.39471264	3.41326744	1.881159
88	0.56948221	8.50657460	4.84434290		88.00000000	0.39022727	3.31949741	1.902555
89	0.57928634	8.30545430	4.81123622		89.00000000	0.38584270	3.20459888	1.924034
90	0.58943361	8.02073000	4.72768784		90.00000000	0.38155556	3.06035409	1.945415
91	0.59921175	7.66696450	4.59413522		91.00000000	0.37736264	2.89322594	1.966801
92	0.60934114	7.14927290	4.35634610		92.00000000	0.37326087	2.66854382	1.988280
93	0.61914825	6.50201320	4.02571009		93.00000000	0.36924731	2.40085090	2.009846
94	0.62925607	5.64336300	3.55112042		94.00000000	0.36531915	2.06162857	2.031230
95	0.63937432	4.54584880	2.90649899		95.00000000	0.36147368	1.64320471	2.052572
96	0.64916211	3.23911830	2.10271287		96.00000000	0.35770833	1.15865961	2.073947
97	0.65928406	1.56150960	1.02947839		97.00000000	0.35402062	0.55280659	2.095429
98	0.66895872	-0.37492853	-0.25081171		98.00000000	0.35040816	-0.13137802	2.116804
99	0.67907399	-2.75347920	-1.86981611		99.00000000	0.34686869	-0.95509571	2.138154
100	0.68877542	-5.44238470	-3.74858081		100.00000000	0.34340000	-1.86891491	2.159531
101	0.69908494	-8.70867630	-6.08810445		101.00000000	0.34000000	-2.96094994	2.181041
17:33 02/04/2018
Test Lot:	JK-PERC
Recipe:	Recipe_YJX-LID
Cell Name:	1-30-2.5h
Test Order:	3
Test Condition:	Light
1	-0.29993656	9.02730560	-2.70761899		1.00000000	34.34000000	309.99767430	0.000000
2	-0.29007185	9.02556800	-2.61806321		2.00000000	17.17000000	154.96900256	0.021602
3	-0.27996075	9.02282140	-2.52603585		3.00000000	11.44666667	103.28122896	0.043012
4	-0.27014440	9.02159120	-2.43713234		4.00000000	8.58500000	77.45036045	0.064431
5	-0.26002067	9.03204150	-2.34851748		5.00000000	6.86800000	62.03206102	0.085797
6	-0.24987088	9.00957580	-2.25123063		6.00000000	5.72333333	51.56480550	0.107270
7	-0.24005304	9.03483870	-2.16884050		7.00000000	4.90571429	44.32233728	0.128654
8	-0.22991070	9.01876260	-2.07351002		8.00000000	4.29250000	38.71303846	0.150025
9	-0.22010030	9.03012940	-1.98753419		9.00000000	3.81555556	34.45496040	0.171383
10	-0.20993116	9.01620580	-1.89278254		10.00000000	3.43400000	30.96165072	0.192861
11	-0.20010886	9.01607230	-1.80419595		11.00000000	3.12181818	28.14653843	0.214234
12	-0.18995088	9.00797370	-1.71107253		12.00000000	2.86166667	25.77781807	0.235630
13	-0.18017176	9.02201840	-1.62551293		13.00000000	2.64153846	23.83200860	0.257123
14	-0.17003089	9.00990770	-1.53196263		14.00000000	2.45285714	22.10001646	0.278508
15	-0.16020338	9.03336520	-1.44717564		15.00000000	2.28933333	20.68038406	0.299873
16	-0.15008560	9.01755620	-1.35340533		16.00000000	2.14625000	19.35392999	0.321250
17	-0.13993657	9.02217200	-1.26253180		17.00000000	2.02000000	18.22478744	0.342742
18	-0.13010086	9.02748780	-1.17448393		18.00000000	1.90777778	17.22244061	0.364109
19	-0.11993396	9.01489930	-1.08119257		19.00000000	1.80736842	16.29324431	0.385453
20	-0.11011016	9.01971530	-0.99316229		20.00000000	1.71700000	15.48685117	0.406836
21	-0.09997452	9.02015970	-0.90178615		21.00000000	1.63523810	14.75010877	0.428314
22	-0.09014924	9.02565860	-0.81365625		22.00000000	1.56090909	14.08823256	0.449684
23	-0.08001955	9.01716710	-0.72154964		23.00000000	1.49304348	13.46302253	0.471038
24	-0.07017343	9.02921490	-0.63361095		24.00000000	1.43083333	12.91930165	0.492416
25	-0.06000652	9.01726720	-0.54109484		25.00000000	1.37360000	12.38611823	0.513905
26	-0.04984780	9.01316170	-0.44928632		26.00000000	1.32076923	11.90430665	0.535292
27	-0.04004932	9.02320000	-0.36137301		27.00000000	1.27185185	11.47617363	0.556657
28	-0.02988316	9.02049350	-0.26956081		28.00000000	1.22642857	11.06299096	0.578038
29	-0.02012040	9.01048660	-0.18129455		29.00000000	1.18413793	10.66965896	0.599533
30	-0.00992521	9.02786640	-0.08960344		30.00000000	1.14466667	10.33389774	0.620901
31	-0.00064623	9.01149650	-0.00582351		31.00000000	1.10774194	9.98241257	0.642370
32	0.00948921	9.02508930	0.08564094		32.00000000	1.07312500	9.68504896	0.663751
33	0.01931570	9.01447010	0.17412076		33.00000000	1.04060606	9.38051222	0.685233
34	0.02946519	9.02270130	0.26585564		34.00000000	1.01000000	9.11292831	0.706617
35	0.03926117	9.01335240	0.35387472		35.00000000	0.98114286	8.84338633	0.727967
36	0.04939057	9.02393250	0.44569716		36.00000000	0.95388889	8.60782895	0.749335
37	0.05922971	9.01094720	0.53371578		37.00000000	0.92810811	8.36313316	0.770816
38	0.06940153	9.00964070	0.62528287		38.00000000	0.90368421	8.14187004	0.792202
39	0.07951903	9.02353760	0.71754298		39.00000000	0.88051282	7.94534054	0.813587
40	0.08931202	9.01986600	0.80558249		40.00000000	0.85850000	7.74355496	0.834951
41	0.09948981	9.01877400	0.89727609		41.00000000	0.83756098	7.55377315	0.856426
42	0.10929769	9.01607420	0.98543608		42.00000000	0.81761905	7.37171400	0.877811
43	0.11945463	9.01820180	1.07726596		43.00000000	0.79860465	7.20197790	0.899203
44	0.12927070	9.01873400	1.16585806		44.00000000	0.78045455	7.03871194	0.920701
45	0.13942689	9.01667310	1.25716669		45.00000000	0.76311111	6.88072343	0.942100
46	0.14920278	9.01614950	1.34523457		46.00000000	0.74652174	6.73075161	0.963454
47	0.15939915	9.01595880	1.43713617		47.00000000	0.73063830	6.58740479	0.984828
48	0.16951665	9.01535130	1.52825215		48.00000000	0.71541667	6.44973258	1.006315
49	0.17933197	9.01056860	1.61588302		49.00000000	0.70081633	6.31475359	1.027696
50	0.18951571	9.02515130	1.71040796		50.00000000	0.68680000	6.19847391	1.049089
51	0.19928341	9.01654150	1.79684714		51.00000000	0.67333333	6.07113794	1.070489
52	0.20941207	9.02851390	1.89067978		52.00000000	0.66038462	5.96229168	1.091978
53	0.21924897	9.02493570	1.97870786		53.00000000	0.64792453	5.84747721	1.113355
54	0.22939847	9.01812360	2.06874376		54.00000000	0.63592593	5.73485860	1.134720
55	0.23919304	9.02246380	2.15811054		55.00000000	0.62436364	5.63329831	1.156095
56	0.24933733	9.02050110	2.24914766		56.00000000	0.61321429	5.53150014	1.217779
57	0.25951809	9.01413150	2.33933019		57.00000000	0.60245614	5.43061887	1.239192
58	0.26934680	9.01782130	2.42892131		58.00000000	0.59206897	5.33917213	1.260684
59	0.27951118	9.01018810	2.51844831		59.00000000	0.58203390	5.24423490	1.282061
60	0.28933471	9.01920990	2.60957048		60.00000000	0.57233333	5.16199447	1.303436
61	0.29946485	9.01512620	2.69971342		61.00000000	0.56295082	5.07507268	1.324805
62	0.30928764	9.01251890	2.78746070		62.00000000	0.55387097	4.99177256	1.346277
63	0.31943864	9.01916600	2.88107012		63.00000000	0.54507937	4.91616128	1.367674
64	0.32923162	9.01549340	2.96818550		64.00000000	0.53656250	4.83737568	1.389029
65	0.33939153	9.01562500	3.05982676		65.00000000	0.52830769	4.76302404	1.410404
66	0.34921581	9.00145820	3.14345152		66.00000000	0.52030303	4.68348598	1.431892
67	0.35935265	9.01456550	3.23940800		67.00000000	0.51253731	4.62030118	1.453259
68	0.36952224	9.01190850	3.33010062		68.00000000	0.50500000	4.55101379	1.474655
69	0.37936437	9.02023790	3.42195687		69.00000000	0.49768116	4.48920246	1.496023
70	0.38946548	9.00416470	3.50681133		70.00000000	0.49057143	4.41718594	1.517498
71	0.39928976	9.01989080	3.60155003		71.00000000	0.48366197	4.36257817	1.538903
72	0.40944743	9.01015280	3.68918391		72.00000000	0.47694444	4.29734232	1.560290
73	0.41925383	8.99975400	3.77318133		73.00000000	0.47041096	4.23358291	1.581640
74	0.42941600	9.00385950	3.86640133		74.00000000	0.46405405	4.17827750	1.603111
75	0.43921867	9.00443360	3.95491535		75.00000000	0.45786667	4.12283000	1.624472
76	0.44938380	9.01088910	4.04934759		76.00000000	0.45184211	4.07149910	1.645850
77	0.45952958	8.99242780	4.13228657		77.00000000	0.44597403	4.01038923	1.667336
78	0.46936724	8.99483590	4.22188130		78.00000000	0.44025641	3.96003416	1.688729
79	0.47953907	8.97150990	4.30218951		79.00000000	0.43468354	3.89976772	1.710080
80	0.48935440	8.97922040	4.39402101		80.00000000	0.42925000	3.85433036	1.731465
81	0.49947187	8.97644330	4.48348092		81.00000000	0.42395062	3.80556868	1.752942
82	0.50929391	8.93998340	4.55307910		82.00000000	0.41878049	3.74389061	1.774320
83	0.51944786	8.90919110	4.62786025		83.00000000	0.41373494	3.68604364	1.795684
84	0.52921110	8.88882640	4.70406560		84.00000000	0.40880952	3.63383689	1.817066
85	0.53937179	8.83687780	4.76636260		85.00000000	0.40400000	3.57009863	1.838538
86	0.54953319	8.75922200	4.81348321		86.00000000	0.39930233	3.49757771	1.859911
87	0.55934107	8.65282150	4.83987844		87.00000000	0.39471264	3.41537805	1.881254
88	0.56947571	8.51405140	4.84854547		88.00000000	0.39022727	3.32241506	1.902641
89	0.57927614	8.32197480	4.82072144		89.00000000	0.38584270	3.21097320	1.924112
90	0.58939141	8.05105590	4.74522319		90.00000000	0.38155556	3.07192511	1.945484
91	0.59920597	7.69243380	4.60935226		91.00000000	0.37736264	2.90283711	1.966841
92	0.60932201	7.18878360	4.38028407		92.00000000	0.37326087	2.68329162	1.988313
93	0.61910754	6.54809380	4.05397424		93.00000000	0.36924731	2.41786603	2.009847
94	0.62923771	5.70639040	3.59067603		94.00000000	0.36531915	2.08465368	2.031253
95	0.63938123	4.60911040	2.94697868		95.00000000	0.36147368	1.66607212	2.052615
96	0.64914149	3.28615690	2.13318079		96.00000000	0.35770833	1.17548571	2.073985
97	0.65925306	1.59130750	1.04907434		97.00000000	0.35402062	0.56335567	2.095477
98	0.66897905	-0.38138029	-0.25513542		98.00000000	0.35040816	-0.13363877	2.116857
99	0.67905039	-2.80718900	-1.90622279		99.00000000	0.34686869	-0.97372596	2.138222
100	0.68880993	-5.59425210	-3.85337640		100.00000000	0.34340000	-1.92106617	2.159592
101	0.69908518	-8.98076730	-6.27832132		101.00000000	0.34000000	-3.05346088	2.181066
17:33 02/04/2018
Test Lot:	JK-PERC
Recipe:	Recipe_YJX-LID
Cell Name:	1-30-2.5h
Test Order:	4
Test Condition:	Light
1	-0.29994485	9.01528930	-2.70408960		1.00000000	34.34000000	309.58503456	0.000000
2	-0.29007193	9.02672960	-2.61840088		2.00000000	17.17000000	154.98894723	0.021600
3	-0.27997127	9.01447870	-2.52379505		3.00000000	11.44666667	103.18573285	0.042996
4	-0.27020180	9.01430800	-2.43568225		4.00000000	8.58500000	77.38783418	0.064367
5	-0.26004755	9.01887420	-2.34533614		5.00000000	6.86800000	61.94162801	0.085744
6	-0.24989925	9.01593880	-2.25307634		6.00000000	5.72333333	51.60122307	0.107227
7	-0.24005164	9.01356410	-2.16372084		7.00000000	4.90571429	44.21797017	0.128611
8	-0.22994204	9.02565000	-2.07537637		8.00000000	4.29250000	38.74260263	0.149971
9	-0.22007507	9.02053640	-1.98519518		9.00000000	3.81555556	34.41835778	0.171344
10	-0.20992900	9.01462840	-1.89243193		10.00000000	3.43400000	30.95623393	0.192832
11	-0.20009702	9.03052810	-1.80698176		11.00000000	3.12181818	28.19166681	0.214267
12	-0.18995394	9.00947670	-1.71138560		12.00000000	2.86166667	25.78211916	0.235666
13	-0.18017256	9.01481530	-1.62422235		13.00000000	2.64153846	23.81298134	0.257020
14	-0.17004213	9.02466870	-1.53457389		14.00000000	2.45285714	22.13622308	0.278503
15	-0.16025108	9.01793960	-1.44513456		15.00000000	2.28933333	20.64506972	0.299881
16	-0.15006407	9.02698140	-1.35462557		16.00000000	2.14625000	19.37415883	0.321258
17	-0.13993512	9.01921460	-1.26210488		17.00000000	2.02000000	18.21881349	0.342715
18	-0.13010016	9.01585200	-1.17296379		18.00000000	1.90777778	17.20024209	0.364172
19	-0.11997940	9.02431300	-1.08273166		19.00000000	1.80736842	16.31025834	0.385532
20	-0.11013848	9.01914120	-0.99335450		20.00000000	1.71700000	15.48586544	0.406915
21	-0.10000135	9.01746560	-0.90175873		21.00000000	1.63523810	14.74570327	0.428271
22	-0.09016267	9.02478690	-0.81369884		22.00000000	1.56090909	14.08687192	0.449778
23	-0.08004860	9.01619720	-0.72173395		23.00000000	1.49304348	13.46157443	0.471160
24	-0.07022034	9.02140430	-0.63348611		24.00000000	1.43083333	12.90812599	0.492532
25	-0.06004599	9.01403140	-0.54125645		25.00000000	1.37360000	12.38167353	0.513901
26	-0.04991629	9.03850650	-0.45116874		26.00000000	1.32076923	11.93778128	0.535386
27	-0.04006273	9.00785640	-0.36087931		27.00000000	1.27185185	11.45665884	0.556775
28	-0.02992187	9.01655480	-0.26979217		28.00000000	1.22642857	11.05816042	0.578158
29	-0.02010850	9.02214720	-0.18142180		29.00000000	1.18413793	10.68346672	0.599517
30	-0.00994382	9.01135440	-0.08960727		30.00000000	1.14466667	10.31499700	0.621005
31	-0.00066261	9.02517220	-0.00598014		31.00000000	1.10774194	9.99756172	0.642487
32	0.00949219	9.01628590	0.08558427		32.00000000	1.07312500	9.67560181	0.663890
33	0.01929561	9.01984880	0.17404346		33.00000000	1.04060606	9.38610933	0.685378
34	0.02943320	9.01365570	0.26530071		34.00000000	1.01000000	9.10379226	0.706751
35	0.03924332	9.00660610	0.35344911		35.00000000	0.98114286	8.83676724	0.728110
36	0.04941961	9.02645590	0.44608395		36.00000000	0.95388889	8.61023599	0.749479
37	0.05923792	9.01410290	0.53397667		37.00000000	0.92810811	8.36606199	0.770988
38	0.06938444	9.01842690	0.62573851		38.00000000	0.90368421	8.14980999	0.792374
39	0.07951831	9.01633260	0.71696354		39.00000000	0.88051282	7.93899645	0.813720
40	0.08933513	9.01820470	0.80564248		40.00000000	0.85850000	7.74212873	0.835104
41	0.09946454	9.01623920	0.89679605		41.00000000	0.83756098	7.55165010	0.856583
42	0.10930815	9.02936840	0.98698356		42.00000000	0.81761905	7.38258359	0.877957
43	0.11945839	9.01774790	1.07724565		43.00000000	0.79860465	7.20161542	0.899326
44	0.12927075	9.01408290	1.16525726		44.00000000	0.78045455	7.03508197	0.920690
45	0.13945225	9.01821330	1.25761014		45.00000000	0.76311111	6.88189877	0.942165
46	0.14924525	9.02522750	1.34697233		46.00000000	0.74652174	6.73752853	0.963567
47	0.15938284	9.02000430	1.43763390		47.00000000	0.73063830	6.59036059	0.984919
48	0.16950630	9.01497550	1.52809514		48.00000000	0.71541667	6.44946372	1.006287
49	0.17932013	9.02209380	1.61784303		49.00000000	0.70081633	6.32283063	1.027766
50	0.18950015	9.02451520	1.71014698		50.00000000	0.68680000	6.19803704	1.049144
51	0.19924700	9.01435660	1.79608351		51.00000000	0.67333333	6.06966678	1.070491
52	0.20943372	9.02521230	1.89018379		52.00000000	0.66038462	5.96011135	1.091883
53	0.21924904	9.02635380	1.97901941		53.00000000	0.64792453	5.84839603	1.113364
54	0.22941864	9.01882080	2.06908560		54.00000000	0.63592593	5.73530197	1.134749
55	0.23922876	9.02225880	2.15838379		55.00000000	0.62436364	5.63317031	1.156126
56	0.24938272	9.01118280	2.24723328		56.00000000	0.61321429	5.52578602	1.177492
57	0.25949278	9.02051450	2.34075838		57.00000000	0.60245614	5.43446435	1.198975
58	0.26935872	9.01074030	2.42712147		58.00000000	0.59206897	5.33497969	1.220363
59	0.27949557	9.01995370	2.52103710		59.00000000	0.58203390	5.24991881	1.241742
60	0.28928187	9.00441840	2.60481499		60.00000000	0.57233333	5.15352880	1.263118
61	0.29946783	9.02414800	2.70244202		61.00000000	0.56295082	5.08015151	1.284584
62	0.30929285	9.01827810	2.78928894		62.00000000	0.55387097	4.99496242	1.305963
63	0.31941926	9.01851840	2.88068847		63.00000000	0.54507937	4.91580828	1.327349
64	0.32924056	9.02360530	2.97093686		64.00000000	0.53656250	4.84172822	1.348839
65	0.33941981	9.01430320	3.05963308		65.00000000	0.52830769	4.76232572	1.370215
66	0.34918752	9.01658150	3.14847773		66.00000000	0.52030303	4.69135468	1.391570
67	0.35940325	9.01741410	3.24088793		67.00000000	0.51253731	4.62176120	1.412948
68	0.36951926	9.01289270	3.33043744		68.00000000	0.50500000	4.55151081	1.434424
69	0.37934577	9.01618390	3.42025122		69.00000000	0.49768116	4.48718486	1.455810
70	0.38949972	9.01710220	3.51215878		70.00000000	0.49057143	4.42353271	1.477156
71	0.39933962	9.01089570	3.59840766		71.00000000	0.48366197	4.35822758	1.498535
72	0.40946829	8.99981210	3.68513767		72.00000000	0.47694444	4.29241038	1.520016
73	0.41930518	9.00814820	3.77716320		73.00000000	0.47041096	4.23753163	1.541401
74	0.42943832	9.01301480	3.87053393		74.00000000	0.46405405	4.18252606	1.562756
75	0.43926331	9.01018430	3.95784338		75.00000000	0.45786667	4.12546305	1.584141
76	0.44941655	9.00591180	4.04740581		76.00000000	0.45184211	4.06925015	1.605612
77	0.45956531	9.00275800	4.13735527		77.00000000	0.44597403	4.01499623	1.627001
78	0.46941113	8.98955730	4.21979825		78.00000000	0.44025641	3.95771023	1.648350
79	0.47953311	8.99051670	4.31125043		79.00000000	0.43468354	3.90802966	1.669714
80	0.48935735	8.96769140	4.38840570		80.00000000	0.42925000	3.84938153	1.691197
81	0.49949124	8.96177860	4.47632991		81.00000000	0.42395062	3.79935157	1.712576
82	0.50932890	8.95482440	4.56095086		82.00000000	0.41878049	3.75010573	1.733940
83	0.51946276	8.91606710	4.63156482		83.00000000	0.41373494	3.68888848	1.755327
84	0.52920443	8.87382790	4.69606904		84.00000000	0.40880952	3.62770536	1.776802
85	0.53938371	8.83291240	4.76432906		85.00000000	0.40400000	3.56849661	1.798193
86	0.54954731	8.75041010	4.80876433		86.00000000	0.39930233	3.49405910	1.819552
87	0.55934852	8.65533450	4.84134854		87.00000000	0.39471264	3.41636996	1.840914
88	0.56946379	8.51459880	4.84875570		88.00000000	0.39022727	3.32262867	1.862392
89	0.57929397	8.31014440	4.81401654		89.00000000	0.38584270	3.20640852	1.883759
90	0.58941072	8.03743650	4.73735123		90.00000000	0.38155556	3.06672855	1.905142
91	0.59920448	7.68375730	4.60414180		91.00000000	0.37736264	2.89956292	1.926494
92	0.60933387	7.17814640	4.37388773		92.00000000	0.37326087	2.67932117	1.947970
93	0.61911798	6.54125310	4.04980741		93.00000000	0.36924731	2.41534012	1.969351
94	0.62921685	5.70539380	3.58992991		94.00000000	0.36531915	2.08428961	1.990850
95	0.63936412	4.60131260	2.94191418		95.00000000	0.36147368	1.66325342	2.012354
96	0.64915788	3.28367350	2.13162253		96.00000000	0.35770833	1.17459737	2.033739
97	0.65925080	1.58323170	1.04374676		97.00000000	0.35402062	0.56049667	2.055105
98	0.66902000	-0.39503905	-0.26428903		98.00000000	0.35040816	-0.13842491	2.076479
99	0.67905188	-2.82933280	-1.92126376		99.00000000	0.34686869	-0.98140695	2.097969
100	0.68880844	-5.63495450	-3.88140422		100.00000000	0.34340000	-1.93504338	2.119347
101	0.69909638	-9.03574470	-6.31685641		101.00000000	0.34000000	-3.07215320	2.140683
