# Supplementary material for: Study on the Electrical Injection Regeneration of Industrialized B-Doped Czochralski Silicon PERC Solar Cells
Source: Hindawi journal article supplement (doi:10.1155/2019/5357370), 2019-06-20
Supplement: f1 [file 5357370.f1.zip › section3.2/IVRawData_1-30-2h.csv]

16:41 02/04/2018
Test Lot:	JK-PERC
Recipe:	Recipe_YJX-LID
Cell Name:	1-30-2h
Test Order:	2
Test Condition:	Light
1	-0.29987949	9.02348230	-2.70595727		1.00000000	34.34000000	309.86638218	0.000000
2	-0.29010245	9.02622410	-2.61852973		2.00000000	17.17000000	154.98026780	0.061759
3	-0.27997929	9.01903440	-2.52514285		3.00000000	11.44666667	103.23788043	0.083306
4	-0.27016354	9.02328400	-2.43776235		4.00000000	8.58500000	77.46489314	0.104699
5	-0.25996819	9.01576230	-2.34381141		5.00000000	6.86800000	61.92025548	0.126106
6	-0.24984281	9.02577210	-2.25502426		6.00000000	5.72333333	51.65750232	0.147476
7	-0.23999652	9.00977230	-2.16231400		7.00000000	4.90571429	44.19936868	0.168965
8	-0.22984064	9.02123930	-2.07344741		8.00000000	4.29250000	38.72366970	0.190346
9	-0.22002785	9.01366620	-1.98325759		9.00000000	3.81555556	34.39214415	0.211697
10	-0.20987493	9.03147600	-1.89548039		10.00000000	3.43400000	31.01408858	0.233061
11	-0.20008671	9.00507640	-1.80179611		11.00000000	3.12181818	28.11221123	0.254558
12	-0.18992634	9.03004550	-1.71504349		12.00000000	2.86166667	25.84098021	0.275947
13	-0.18018651	9.01228900	-1.62389290		13.00000000	2.64153846	23.80630802	0.297303
14	-0.17001125	9.01124480	-1.53201299		14.00000000	2.45285714	22.10329617	0.318689
15	-0.16020666	9.02362250	-1.44564442		15.00000000	2.28933333	20.65807978	0.340165
16	-0.15006490	9.02019980	-1.35361538		16.00000000	2.14625000	19.35960382	0.361536
17	-0.13988295	9.00956540	-1.26028459		17.00000000	2.02000000	18.19932211	0.382896
18	-0.13008803	9.02970030	-1.17465592		18.00000000	1.90777778	17.22666157	0.404291
19	-0.11992023	9.01399140	-1.08095992		19.00000000	1.80736842	16.29160340	0.425776
20	-0.11011936	9.01446530	-0.99266715		20.00000000	1.71700000	15.47783692	0.447147
21	-0.09994411	9.02561660	-0.90205719		21.00000000	1.63523810	14.75903210	0.468489
22	-0.09012314	9.02324010	-0.81320272		22.00000000	1.56090909	14.08445750	0.489865
23	-0.07996947	9.02598190	-0.72180302		23.00000000	1.49304348	13.47618341	0.511342
24	-0.07015744	9.01417830	-0.63241166		24.00000000	1.43083333	12.89778678	0.532736
25	-0.06002684	9.01880070	-0.54137013		25.00000000	1.37360000	12.38822464	0.554128
26	-0.04987169	9.01437000	-0.44956184		26.00000000	1.32076923	11.90590253	0.575470
27	-0.04002244	9.01752760	-0.36090343		27.00000000	1.27185185	11.46895918	0.596952
28	-0.02989929	9.01792340	-0.26962947		28.00000000	1.22642857	11.05983891	0.618338
29	-0.02007088	9.01739410	-0.18098699		29.00000000	1.18413793	10.67783839	0.639727
30	-0.00992614	9.00445560	-0.08937949		30.00000000	1.14466667	10.30710018	0.661146
31	-0.00067084	9.02440640	-0.00605391		31.00000000	1.10774194	9.99671341	0.682740
32	0.00949900	9.01207730	0.08560568		32.00000000	1.07312500	9.67108545	0.704109
33	0.01931522	9.01036170	0.17403709		33.00000000	1.04060606	9.37623699	0.725481
34	0.02944106	9.02401640	0.26567658		34.00000000	1.01000000	9.11425656	0.746828
35	0.03928258	9.01314540	0.35405963		35.00000000	0.98114286	8.84318323	0.768320
36	0.04939279	9.02341080	0.44569146		36.00000000	0.95388889	8.60733130	0.789723
37	0.05922539	9.01252650	0.53377038		37.00000000	0.92810811	8.36459892	0.811085
38	0.06941077	9.01778790	0.62593161		38.00000000	0.90368421	8.14923254	0.832442
39	0.07953363	9.02117060	0.71748644		39.00000000	0.88051282	7.94325637	0.853919
40	0.08936697	9.00813580	0.80502982		40.00000000	0.85850000	7.73348458	0.875299
41	0.09947792	9.02027990	0.89731872		41.00000000	0.83756098	7.55503443	0.896686
42	0.10932392	9.01809220	0.98589319		42.00000000	0.81761905	7.37336396	0.918054
43	0.11945050	9.01151850	1.07643039		43.00000000	0.79860465	7.19664059	0.939536
44	0.12930617	9.01314740	1.16545557		44.00000000	0.78045455	7.03435186	0.960911
45	0.13942011	9.01339720	1.25664883		45.00000000	0.76311111	6.87822355	0.982301
46	0.14924005	9.01270680	1.34505681		46.00000000	0.74652174	6.72818155	1.003787
47	0.15939045	9.01095770	1.43626060		47.00000000	0.73063830	6.58375080	1.025169
48	0.16953713	9.01557160	1.52847413		48.00000000	0.71541667	6.44989018	1.046540
49	0.17935483	9.01651000	1.61715462		49.00000000	0.70081633	6.31891742	1.067922
50	0.18951938	9.01294990	1.70812868		50.00000000	0.68680000	6.19009399	1.089391
51	0.19929764	9.01827530	1.79732098		51.00000000	0.67333333	6.07230537	1.110766
52	0.20945399	9.01360230	1.88793497		52.00000000	0.66038462	5.95244429	1.132109
53	0.21925458	9.01381590	1.97632042		53.00000000	0.64792453	5.84027242	1.153477
54	0.22940052	9.01278310	2.06753713		54.00000000	0.63592593	5.73146244	1.174962
55	0.23919739	9.01698020	2.15683813		55.00000000	0.62436364	5.62987455	1.196339
56	0.24937682	9.00635340	2.24597577		56.00000000	0.61321429	5.52282457	1.217702
57	0.25952721	9.00996780	2.33833181		57.00000000	0.60245614	5.42811043	1.239071
58	0.26930472	9.01469230	2.42769919		58.00000000	0.59206897	5.33731954	1.260558
59	0.27950576	9.01079560	2.51856927		59.00000000	0.58203390	5.24458849	1.281962
60	0.28931898	9.00800230	2.60618604		60.00000000	0.57233333	5.15557998	1.303315
61	0.29947162	9.02258110	2.70200698		61.00000000	0.56295082	5.07926943	1.324691
62	0.30929679	9.00855060	2.78631578		62.00000000	0.55387097	4.98957464	1.346188
63	0.31945908	9.01598260	2.88023751		63.00000000	0.54507937	4.91442607	1.367572
64	0.32926562	8.99902530	2.96306964		64.00000000	0.53656250	4.82853951	1.388931
65	0.33942273	9.01774790	3.06082861		65.00000000	0.52830769	4.76414558	1.410298
66	0.34923524	9.01673700	3.14896231		66.00000000	0.52030303	4.69143558	1.431773
67	0.35939828	9.01757430	3.24090069		67.00000000	0.51253731	4.62184331	1.453163
68	0.36953899	9.00891490	3.32914531		68.00000000	0.50500000	4.54950202	1.474530
69	0.37937605	9.00928690	3.41790768		69.00000000	0.49768116	4.48375235	1.495892
70	0.38950190	9.01326750	3.51068482		70.00000000	0.49057143	4.42165151	1.517376
71	0.39930400	9.01151180	3.59833271		71.00000000	0.48366197	4.35852557	1.538756
72	0.40947747	9.00836750	3.68872353		72.00000000	0.47694444	4.29649083	1.560136
73	0.41929740	9.00656320	3.77642853		73.00000000	0.47041096	4.23678603	1.581487
74	0.42944333	9.00585940	3.86750625		74.00000000	0.46405405	4.17920556	1.602972
75	0.43928263	9.00518510	3.95582139		75.00000000	0.45786667	4.12317408	1.624344
76	0.44942409	8.99196430	4.04120537		76.00000000	0.45184211	4.06294808	1.645725
77	0.45957077	8.99003310	4.13155643		77.00000000	0.44597403	4.00932126	1.667224
78	0.46943241	9.00654700	4.22796506		78.00000000	0.44025641	3.96519005	1.688618
79	0.47956717	8.98280530	4.30785852		79.00000000	0.43468354	3.90467765	1.709963
80	0.48936701	8.97312260	4.39115018		80.00000000	0.42925000	3.85171288	1.731331
81	0.49951369	8.96187020	4.47657685		81.00000000	0.42395062	3.79939040	1.752824
82	0.50933141	8.95406150	4.56058477		82.00000000	0.41878049	3.74978624	1.774222
83	0.51947886	8.91507050	4.63119066		83.00000000	0.41373494	3.68847616	1.795575
84	0.52921468	8.88353060	4.70129480		84.00000000	0.40880952	3.63167191	1.816957
85	0.53939110	8.81793980	4.75631825		85.00000000	0.40400000	3.56244768	1.838439
86	0.54954225	8.75543310	4.81148041		86.00000000	0.39930233	3.49606480	1.859824
87	0.55934060	8.64251520	4.83410964		87.00000000	0.39471264	3.41131002	1.881178
88	0.56947762	8.49193570	4.83596733		88.00000000	0.39022727	3.31378491	1.902551
89	0.57927972	8.29616450	4.80579985		89.00000000	0.38584270	3.20101448	1.924043
90	0.58939439	8.01109980	4.72169728		90.00000000	0.38155556	3.05667963	1.945439
91	0.59921360	7.64363670	4.58017106		91.00000000	0.37736264	2.88442290	1.966785
92	0.60932750	7.12506150	4.34149591		92.00000000	0.37326087	2.65950665	1.988258
93	0.61909461	6.48147300	4.01264500		93.00000000	0.36924731	2.39326648	2.009758
94	0.62923163	5.60934070	3.52957459		94.00000000	0.36531915	2.04919957	2.031205
95	0.63933218	4.51753900	2.88820806		95.00000000	0.36147368	1.63297147	2.052582
96	0.64912081	3.19195910	2.07196708		96.00000000	0.35770833	1.14179037	2.073964
97	0.65923554	1.51095090	0.99607253		97.00000000	0.35402062	0.53490777	2.095454
98	0.66899443	-0.43802795	-0.29303826		98.00000000	0.35040816	-0.15348857	2.116845
99	0.67904437	-2.80363870	-1.90379507		99.00000000	0.34686869	-0.97249447	2.138250
100	0.68879730	-5.52929500	-3.80856347		100.00000000	0.34340000	-1.89875990	2.159625
101	0.69907123	-8.78014180	-6.13794453		101.00000000	0.34000000	-2.98524821	2.181097
16:41 02/04/2018
Test Lot:	JK-PERC
Recipe:	Recipe_YJX-LID
Cell Name:	1-30-2h
Test Order:	3
Test Condition:	Light
1	-0.29988232	9.00878240	-2.70157457		1.00000000	34.34000000	309.36158762	0.000000
2	-0.29007623	9.01666260	-2.61551949		2.00000000	17.17000000	154.81609684	0.061800
3	-0.27995083	9.01615520	-2.52408013		3.00000000	11.44666667	103.20492319	0.083235
4	-0.27013877	9.01455970	-2.43518207		4.00000000	8.58500000	77.38999502	0.104737
5	-0.25995901	9.02190300	-2.34532497		5.00000000	6.86800000	61.96242980	0.126108
6	-0.24982394	9.01325510	-2.25172690		6.00000000	5.72333333	51.58586336	0.147508
7	-0.23997915	9.01320840	-2.16298209		7.00000000	4.90571429	44.21622521	0.168853
8	-0.22983810	9.00963500	-2.07075739		8.00000000	4.29250000	38.67385824	0.190356
9	-0.22000447	9.00923350	-1.98207164		9.00000000	3.81555556	34.37523093	0.211746
10	-0.20986642	9.02180100	-1.89337308		10.00000000	3.43400000	30.98086463	0.233125
11	-0.20005064	9.01977350	-1.80441146		11.00000000	3.12181818	28.15809291	0.254553
12	-0.18992820	9.00826550	-1.71092365		12.00000000	2.86166667	25.77865311	0.276026
13	-0.18014370	9.03238010	-1.62712637		13.00000000	2.64153846	23.85937943	0.297396
14	-0.16999447	8.99945350	-1.52985733		14.00000000	2.45285714	22.07437380	0.318777
15	-0.16016158	9.02227690	-1.44502212		15.00000000	2.28933333	20.65499925	0.340144
16	-0.15000342	9.01259420	-1.35191995		16.00000000	2.14625000	19.34328030	0.361642
17	-0.13986239	9.01210020	-1.26045387		17.00000000	2.02000000	18.20444240	0.383035
18	-0.13004884	9.01511100	-1.17240473		18.00000000	1.90777778	17.19882843	0.404403
19	-0.11990260	9.02584460	-1.08222223		19.00000000	1.80736842	16.31302650	0.425760
20	-0.11007418	9.02168460	-0.99305453		20.00000000	1.71700000	15.49023246	0.447229
21	-0.09989891	9.01303960	-0.90039279		21.00000000	1.63523810	14.73846571	0.468602
22	-0.09011513	9.02361010	-0.81316380		22.00000000	1.56090909	14.08503504	0.489974
23	-0.07996442	9.02227210	-0.72146077		23.00000000	1.49304348	13.47064452	0.511327
24	-0.07013004	8.99535470	-0.63084461		24.00000000	1.43083333	12.87085335	0.532817
25	-0.06000687	9.02069470	-0.54130364		25.00000000	1.37360000	12.39082624	0.554214
26	-0.04982639	9.01575850	-0.44922267		26.00000000	1.32076923	11.90773642	0.575593
27	-0.03998010	9.01385590	-0.36037482		27.00000000	1.27185185	11.46428932	0.597065
28	-0.02985023	9.01819990	-0.26919531		28.00000000	1.22642857	11.06017802	0.618445
29	-0.02001510	9.00610730	-0.18025812		29.00000000	1.18413793	10.66447326	0.639790
30	-0.00988523	9.01809120	-0.08914589		30.00000000	1.14466667	10.32270839	0.661164
31	-0.00063140	9.00860400	-0.00568799		31.00000000	1.10774194	9.97920843	0.682773
32	0.00949306	9.02240850	0.08565023		32.00000000	1.07312500	9.68217212	0.704151
33	0.01933014	9.01632210	0.17428673		33.00000000	1.04060606	9.38243942	0.725494
34	0.02948428	9.01350020	0.26575655		34.00000000	1.01000000	9.10363520	0.746886
35	0.03928117	9.01388740	0.35407602		35.00000000	0.98114286	8.84391124	0.768365
36	0.04944126	9.01148800	0.44553935		36.00000000	0.95388889	8.59595828	0.789746
37	0.05926569	9.02132420	0.53465502		37.00000000	0.92810811	8.37276414	0.811119
38	0.06941909	9.01535800	0.62583791		38.00000000	0.90368421	8.14703668	0.832492
39	0.07956207	9.00280950	0.71628214		39.00000000	0.88051282	7.92708919	0.853973
40	0.08933291	9.01522250	0.80535604		40.00000000	0.85850000	7.73956852	0.875349
41	0.09949821	9.01085380	0.89656384		41.00000000	0.83756098	7.54713950	0.896700
42	0.10934944	9.01611230	0.98590683		42.00000000	0.81761905	7.37174515	0.918079
43	0.11947976	9.00945470	1.07644749		43.00000000	0.79860465	7.19499243	0.939556
44	0.12928335	9.01668450	1.16570718		44.00000000	0.78045455	7.03711240	0.960942
45	0.13940772	8.99965190	1.25462095		45.00000000	0.76311111	6.86773436	0.982297
46	0.14926861	9.01241590	1.34527079		46.00000000	0.74652174	6.72796439	1.003669
47	0.15940936	9.00967220	1.43622608		47.00000000	0.73063830	6.58281156	1.025140
48	0.16955680	8.99938200	1.52590641		48.00000000	0.71541667	6.43830787	1.046529
49	0.17938644	9.02516080	1.61899147		49.00000000	0.70081633	6.32498004	1.067904
50	0.18949667	9.01468850	1.70825345		50.00000000	0.68680000	6.19128806	1.089270
51	0.19926900	9.02259250	1.79792298		51.00000000	0.67333333	6.07521228	1.110759
52	0.20944993	9.00457380	1.88600735		52.00000000	0.66038462	5.94648201	1.132136
53	0.21928106	9.01882080	1.97765658		53.00000000	0.64792453	5.84351521	1.153518
54	0.22941510	9.00556660	2.06601296		54.00000000	0.63592593	5.72687328	1.174861
55	0.23923953	9.01810840	2.15748802		55.00000000	0.62436364	5.63057895	1.196322
56	0.24936762	9.01057150	2.24694477		56.00000000	0.61321429	5.52541117	1.217715
57	0.25953293	9.01291940	2.33914938		57.00000000	0.60245614	5.42988864	1.239097
58	0.26937002	9.01649760	2.42877414		58.00000000	0.59206897	5.33838841	1.260571
59	0.27952415	9.01435660	2.51973037		59.00000000	0.58203390	5.24666111	1.281956
60	0.28935900	9.02055640	2.61017918		60.00000000	0.57233333	5.16276511	1.303305
61	0.29949453	8.99992940	2.69542963		61.00000000	0.56295082	5.06651763	1.324681
62	0.30931449	9.01967330	2.78991565		62.00000000	0.55387097	4.99573518	1.346179
63	0.31946269	9.00997540	2.87835098		63.00000000	0.54507937	4.91115167	1.367552
64	0.32928413	9.02067470	2.97036502		64.00000000	0.53656250	4.84015577	1.388893
65	0.33943307	9.00499250	3.05659225		65.00000000	0.52830769	4.75740681	1.410275
66	0.34924632	9.01171110	3.14730694		66.00000000	0.52030303	4.68882059	1.431750
67	0.35942578	9.00486370	3.23658016		67.00000000	0.51253731	4.61532865	1.453143
68	0.36955908	9.01565840	3.33181842		68.00000000	0.50500000	4.55290749	1.474486
69	0.37939319	9.01097390	3.41870213		69.00000000	0.49768116	4.48459194	1.495861
70	0.38951308	9.00626950	3.50805977		70.00000000	0.49057143	4.41821849	1.517337
71	0.39932412	9.00821020	3.59719561		71.00000000	0.48366197	4.35692871	1.538725
72	0.40949389	9.01283450	3.69070066		72.00000000	0.47694444	4.29862134	1.560079
73	0.41933098	9.00199700	3.77481622		73.00000000	0.47041096	4.23463804	1.581463
74	0.42949033	9.00433830	3.86727623		74.00000000	0.46405405	4.17849969	1.602942
75	0.43929985	9.00697330	3.95676202		75.00000000	0.45786667	4.12399284	1.624306
76	0.44943094	9.00263120	4.04606100		76.00000000	0.45184211	4.06776783	1.645667
77	0.45957243	8.99731060	4.13491590		77.00000000	0.44597403	4.01256683	1.667046
78	0.46942738	8.98521800	4.21790734		78.00000000	0.44025641	3.95579982	1.688526
79	0.47955769	8.98271370	4.30772943		79.00000000	0.43468354	3.90463783	1.709919
80	0.48936501	8.96042730	4.38491960		80.00000000	0.42925000	3.84626342	1.731281
81	0.49951020	8.97241500	4.48181281		81.00000000	0.42395062	3.80386088	1.752648
82	0.50932646	8.92788030	4.54720567		82.00000000	0.41878049	3.73882207	1.774123
83	0.51948059	8.90779880	4.62742858		83.00000000	0.41373494	3.68546760	1.795494
84	0.52925146	8.87834840	4.69887885		84.00000000	0.40880952	3.62955338	1.816902
85	0.53940332	8.81521420	4.75495581		85.00000000	0.40400000	3.56134654	1.838258
86	0.54954857	8.74181180	4.80405017		86.00000000	0.39930233	3.49062578	1.859739
87	0.55936849	8.63879870	4.83227178		87.00000000	0.39471264	3.40984307	1.881119
88	0.56947500	8.49462990	4.83747936		88.00000000	0.39022727	3.31483626	1.902504
89	0.57929498	8.29214670	4.80359896		89.00000000	0.38584270	3.19946424	1.923986
90	0.58942604	8.01838970	4.72624769		90.00000000	0.38155556	3.05946114	1.945378
91	0.59920585	7.64392660	4.58028554		91.00000000	0.37736264	2.88453230	1.966738
92	0.60935104	7.13156560	4.34562692		92.00000000	0.37326087	2.66193438	1.988203
93	0.61915088	6.48721930	4.01656754		93.00000000	0.36924731	2.39538829	2.009719
94	0.62923658	5.61991930	3.53625880		94.00000000	0.36531915	2.05306414	2.031092
95	0.63939887	4.52509550	2.89334095		95.00000000	0.36147368	1.63570294	2.052448
96	0.64915335	3.21001050	2.08378907		96.00000000	0.35770833	1.14824751	2.073876
97	0.65929335	1.52163100	1.00320120		97.00000000	0.35402062	0.53868875	2.095373
98	0.66903818	-0.42394254	-0.28363375		98.00000000	0.35040816	-0.14855293	2.116757
99	0.67907840	-2.80661890	-1.90591427		99.00000000	0.34686869	-0.97352821	2.138100
100	0.68880236	-5.52082440	-3.80275688		100.00000000	0.34340000	-1.89585110	2.159472
101	0.69908154	-8.79244330	-6.14663480		101.00000000	0.34000000	-2.98943072	2.180974
16:41 02/04/2018
Test Lot:	JK-PERC
Recipe:	Recipe_YJX-LID
Cell Name:	1-30-2h
Test Order:	4
Test Condition:	Light
1	-0.29993409	9.02596860	-2.70719568		1.00000000	34.34000000	309.95176172	0.000000
2	-0.29009748	9.00720880	-2.61296857		2.00000000	17.17000000	154.65377510	0.061792
3	-0.27997205	9.01537130	-2.52405198		3.00000000	11.44666667	103.19595015	0.083264
4	-0.27010936	9.01924800	-2.43618330		4.00000000	8.58500000	77.43024408	0.104700
5	-0.25996906	9.01607040	-2.34389935		5.00000000	6.86800000	61.92237151	0.126189
6	-0.24983397	9.01123430	-2.25131244		6.00000000	5.72333333	51.57429764	0.147566
7	-0.24000925	9.01164150	-2.16287732		7.00000000	4.90571429	44.20853844	0.168970
8	-0.22985332	9.01075360	-2.07115163		8.00000000	4.29250000	38.67865983	0.190343
9	-0.22003603	9.01268100	-1.98311455		9.00000000	3.81555556	34.38838506	0.211841
10	-0.20986968	9.01486210	-1.89194622		10.00000000	3.43400000	30.95703645	0.233221
11	-0.20003752	9.00855540	-1.80204908		11.00000000	3.12181818	28.12307204	0.254593
12	-0.18988828	9.01997570	-1.71278767		12.00000000	2.86166667	25.81216379	0.275956
13	-0.18013501	9.01224230	-1.62342036		13.00000000	2.64153846	23.80618466	0.297436
14	-0.16995749	9.01266100	-1.53176924		14.00000000	2.45285714	22.10676991	0.318822
15	-0.16014914	9.02537250	-1.44540564		15.00000000	2.28933333	20.66208611	0.340208
16	-0.15002149	9.00605580	-1.35110191		16.00000000	2.14625000	19.32924726	0.361574
17	-0.13986854	9.01828670	-1.26137459		17.00000000	2.02000000	18.21693913	0.383055
18	-0.13005647	9.00523950	-1.17118966		18.00000000	1.90777778	17.17999580	0.404418
19	-0.11992808	9.01427170	-1.08106430		19.00000000	1.80736842	16.29211001	0.425798
20	-0.11012941	9.02846150	-0.99429914		20.00000000	1.71700000	15.50186840	0.447281
21	-0.09993774	9.00505260	-0.89994464		21.00000000	1.63523810	14.72540506	0.468654
22	-0.09008846	9.02515410	-0.81306227		22.00000000	1.56090909	14.08744508	0.490012
23	-0.07998017	9.00893590	-0.72053618		23.00000000	1.49304348	13.45073299	0.511383
24	-0.07016289	9.01821520	-0.63274400		24.00000000	1.43083333	12.90356292	0.532861
25	-0.05999802	9.01458170	-0.54085709		25.00000000	1.37360000	12.38242942	0.554233
26	-0.04984953	9.01083370	-0.44918585		26.00000000	1.32076923	11.90123189	0.575593
27	-0.04001588	9.01272960	-0.36065231		27.00000000	1.27185185	11.46285683	0.596970
28	-0.02987483	9.01599690	-0.26935138		28.00000000	1.22642857	11.05747620	0.618461
29	-0.02003746	9.01845170	-0.18070684		29.00000000	1.18413793	10.67909074	0.639833
30	-0.00990757	9.00421140	-0.08920989		30.00000000	1.14466667	10.30682065	0.661195
31	-0.00064777	9.02755070	-0.00584781		31.00000000	1.10774194	10.00019649	0.682688
32	0.00948860	9.00947480	0.08548731		32.00000000	1.07312500	9.66829264	0.704177
33	0.01928848	9.01925950	0.17396781		33.00000000	1.04060606	9.38549610	0.725568
34	0.02947390	9.02502730	0.26600271		34.00000000	1.01000000	9.11527757	0.746923
35	0.03925517	9.01275630	0.35379726		35.00000000	0.98114286	8.84280147	0.768294
36	0.04943389	9.01735400	0.44576286		36.00000000	0.95388889	8.60155379	0.789769
37	0.05922335	9.01381110	0.53382805		37.00000000	0.92810811	8.36579117	0.811150
38	0.06937081	9.01639560	0.62547463		38.00000000	0.90368421	8.14797434	0.832509
39	0.07953464	9.01767920	0.71721782		39.00000000	0.88051282	7.94018215	0.853890
40	0.08938364	9.00138950	0.80457695		40.00000000	0.85850000	7.72769289	0.875370
41	0.09950430	9.02744010	0.89826910		41.00000000	0.83756098	7.56103154	0.896744
42	0.10928111	9.00769810	0.98437125		42.00000000	0.81761905	7.36486554	0.918130
43	0.11943749	9.01768400	1.07704954		43.00000000	0.79860465	7.20156439	0.939493
44	0.12930362	9.00444030	1.16430673		44.00000000	0.78045455	7.02755636	0.960967
45	0.13943768	9.01784800	1.25742780		45.00000000	0.76311111	6.88162001	0.982344
46	0.14924723	9.01274590	1.34512736		46.00000000	0.74652174	6.72821074	1.003719
47	0.15943488	9.00654130	1.43595683		47.00000000	0.73063830	6.58052401	1.025076
48	0.16955927	9.02064990	1.52953481		48.00000000	0.71541667	6.45352328	1.046545
49	0.17938891	8.99960710	1.61442971		49.00000000	0.70081633	6.30707159	1.067918
50	0.18952298	9.02200510	1.70987729		50.00000000	0.68680000	6.19631310	1.089320
51	0.19927299	9.00365920	1.79418609		51.00000000	0.67333333	6.06246386	1.110813
52	0.20944054	9.01488690	1.88808278		52.00000000	0.66038462	5.95329262	1.132181
53	0.21924192	9.01939490	1.97742946		53.00000000	0.64792453	5.84388719	1.153538
54	0.22942361	9.00817010	2.06668690		54.00000000	0.63592593	5.72852891	1.174926
55	0.23923688	9.01465700	2.15663841		55.00000000	0.62436364	5.62842403	1.196402
56	0.24936722	9.01149750	2.24717208		56.00000000	0.61321429	5.52597900	1.217791
57	0.25950798	9.01332860	2.33903070		57.00000000	0.60245614	5.43013516	1.239153
58	0.26934880	9.00954340	2.42670970		58.00000000	0.59206897	5.33427104	1.260532
59	0.27951634	9.00744250	2.51772736		59.00000000	0.58203390	5.24263687	1.282017
60	0.28930208	9.00804520	2.60604621		60.00000000	0.57233333	5.15560454	1.303395
61	0.29944655	9.01777080	2.70034035		61.00000000	0.56295082	5.07656146	1.324764
62	0.30930451	9.01716040	2.78904838		62.00000000	0.55387097	4.99434336	1.346137
63	0.31943262	9.01446150	2.87951305		63.00000000	0.54507937	4.91359695	1.367614
64	0.32926524	9.00245760	2.96419636		64.00000000	0.53656250	4.83038116	1.388999
65	0.33942536	9.01036450	3.05834621		65.00000000	0.52830769	4.76024488	1.410344
66	0.34921110	9.01142790	3.14689065		66.00000000	0.52030303	4.68867324	1.431719
67	0.35939056	9.02004050	3.24171741		67.00000000	0.51253731	4.62310732	1.453203
68	0.36954024	8.99955370	3.32569723		68.00000000	0.50500000	4.54477462	1.474583
69	0.37936914	9.01214890	3.41893118		69.00000000	0.49768116	4.48517671	1.495926
70	0.38952032	9.01163100	3.51021339		70.00000000	0.49057143	4.42084869	1.517301
71	0.39933360	8.99972250	3.59389158		71.00000000	0.48366197	4.35282353	1.538786
72	0.40951455	9.00710870	3.68854207		72.00000000	0.47694444	4.29589045	1.560180
73	0.41930550	9.00048830	3.77395425		73.00000000	0.47041096	4.23392833	1.581549
74	0.42946488	9.00493720	3.86730427		74.00000000	0.46405405	4.17877761	1.602920
75	0.43928856	9.00120740	3.95412744		75.00000000	0.45786667	4.12135283	1.624393
76	0.44944867	8.99841590	4.04432606		76.00000000	0.45184211	4.06586318	1.645762
77	0.45958051	8.99127960	4.13221686		77.00000000	0.44597403	4.00987716	1.667142
78	0.46942577	8.98800850	4.21920281		78.00000000	0.44025641	3.95702836	1.688499
79	0.47958216	8.98873620	4.31083752		79.00000000	0.43468354	3.90725571	1.709975
80	0.48939618	8.97016720	4.38996556		80.00000000	0.42925000	3.85044427	1.731354
81	0.49950421	8.96021750	4.47566636		81.00000000	0.42395062	3.79868974	1.752741
82	0.50934875	8.93543620	4.55125326		82.00000000	0.41878049	3.74198633	1.774232
83	0.51946121	8.91960430	4.63338844		83.00000000	0.41373494	3.69035195	1.795602
84	0.52924246	8.87541100	4.69724435		84.00000000	0.40880952	3.62835254	1.816960
85	0.53938550	8.82645030	4.76085931		85.00000000	0.40400000	3.56588592	1.838339
86	0.54953295	8.74744700	4.80701035		86.00000000	0.39930233	3.49287593	1.859820
87	0.55933058	8.64390950	4.83480291		87.00000000	0.39471264	3.41186037	1.881215
88	0.56946540	8.48666860	4.83286413		88.00000000	0.39022727	3.31172954	1.902558
89	0.57928461	8.30152320	4.80894463		89.00000000	0.38584270	3.20308210	1.923940
90	0.58940381	8.01230910	4.72248551		90.00000000	0.38155556	3.05714105	1.945429
91	0.59922379	7.64227060	4.57943035		91.00000000	0.37736264	2.88390739	1.966804
92	0.60932803	7.12654110	4.34240125		92.00000000	0.37326087	2.66005893	1.988287
93	0.61913240	6.48618410	4.01580673		93.00000000	0.36924731	2.39500604	2.009695
94	0.62923521	5.62081670	3.53681578		94.00000000	0.36531915	2.05339197	2.031192
95	0.63936555	4.52646640	2.89406668		95.00000000	0.36147368	1.63619849	2.052591
96	0.64916468	3.19781300	2.07590725		96.00000000	0.35770833	1.14388436	2.073968
97	0.65927416	1.51848420	1.00109740		97.00000000	0.35402062	0.53757472	2.095391
98	0.66900408	-0.44088316	-0.29495263		98.00000000	0.35040816	-0.15448906	2.116895
99	0.67906523	-2.84362600	-1.93100754		99.00000000	0.34686869	-0.98636482	2.138271
100	0.68878174	-5.56731370	-3.83466402		100.00000000	0.34340000	-1.91181552	2.159614
101	0.69909817	-8.88285160	-6.20998530		101.00000000	0.34000000	-3.02016954	2.181056
