# Supplementary material for: Study on the Electrical Injection Regeneration of Industrialized B-Doped Czochralski Silicon PERC Solar Cells
Source: Hindawi journal article supplement (doi:10.1155/2019/5357370), 2019-06-20
Supplement: f1 [file 5357370.f1.zip › section3.2/IVRawData_1-30-3h.csv]

18:15 02/04/2018
Test Lot:	JK-PERC
Recipe:	Recipe_YJX-LID
Cell Name:	1-30-3h
Test Order:	2
Test Condition:	Light
1	-0.29993901	9.01128010	-2.70283443		1.00000000	34.34000000	309.44735863	0.000000
2	-0.29015684	9.01823040	-2.61670124		2.00000000	17.17000000	154.84301597	0.061728
3	-0.28000924	9.01374630	-2.52393225		3.00000000	11.44666667	103.17734931	0.083103
4	-0.27015486	9.03157330	-2.43992342		4.00000000	8.58500000	77.53605678	0.104605
5	-0.26001397	9.02212240	-2.34587786		5.00000000	6.86800000	61.96393664	0.126033
6	-0.24988049	9.01452260	-2.25255332		6.00000000	5.72333333	51.59311768	0.147435
7	-0.24004920	9.01219080	-2.16336919		7.00000000	4.90571429	44.21123315	0.168799
8	-0.22988001	9.02385140	-2.07440305		8.00000000	4.29250000	38.73488213	0.190281
9	-0.22007699	9.01499840	-1.98399371		9.00000000	3.81555556	34.39722723	0.211650
10	-0.20994279	9.01009180	-1.89160381		10.00000000	3.43400000	30.94065524	0.233032
11	-0.20008694	9.00995640	-1.80277461		11.00000000	3.12181818	28.12744571	0.254444
12	-0.19000036	9.02267360	-1.71431123		12.00000000	2.86166667	25.81988429	0.275908
13	-0.18019436	9.01284500	-1.62406384		13.00000000	2.64153846	23.80777672	0.297291
14	-0.17004676	9.01640510	-1.53321047		14.00000000	2.45285714	22.11595365	0.318680
15	-0.16021845	9.01525500	-1.44441018		15.00000000	2.28933333	20.63892378	0.340045
16	-0.15008721	9.01721290	-1.35336833		16.00000000	2.14625000	19.35319319	0.361541
17	-0.13993885	9.02332120	-1.26271319		17.00000000	2.02000000	18.22710882	0.382915
18	-0.13011649	9.01031880	-1.17239106		18.00000000	1.90777778	17.18968598	0.404283
19	-0.11997112	9.01571750	-1.08162573		19.00000000	1.80736842	16.29472310	0.425653
20	-0.11015546	9.01120950	-0.99263393		20.00000000	1.71700000	15.47224671	0.447122
21	-0.09997360	9.03772830	-0.90353427		21.00000000	1.63523810	14.77883761	0.468513
22	-0.09016092	9.01487160	-0.81278913		22.00000000	1.56090909	14.07139503	0.489892
23	-0.08001852	9.01731110	-0.72155189		23.00000000	1.49304348	13.46323753	0.511232
24	-0.07022519	9.01521870	-0.63309548		24.00000000	1.43083333	12.89927542	0.532704
25	-0.06002697	9.01646330	-0.54123097		25.00000000	1.37360000	12.38501399	0.554075
26	-0.04990317	9.02557560	-0.45040486		26.00000000	1.32076923	11.92070254	0.575458
27	-0.04006667	9.00499820	-0.36080033		27.00000000	1.27185185	11.45302364	0.596945
28	-0.02991832	9.02987100	-0.27015856		28.00000000	1.22642857	11.07449179	0.618329
29	-0.02012201	9.00629330	-0.18122472		29.00000000	1.18413793	10.66469351	0.639673
30	-0.00995281	9.01163010	-0.08969108		30.00000000	1.14466667	10.31531259	0.661048
31	-0.00067081	9.00347140	-0.00603961		31.00000000	1.10774194	9.97352283	0.682634
32	0.00946394	9.01665690	0.08533312		32.00000000	1.07312500	9.67599994	0.704026
33	0.01931579	9.01736450	0.17417754		33.00000000	1.04060606	9.38352415	0.725366
34	0.02944749	9.00869850	0.26528351		34.00000000	1.01000000	9.09878549	0.746725
35	0.03924723	9.01618480	0.35386031		35.00000000	0.98114286	8.84616532	0.768213
36	0.04941614	9.01968570	0.44571805		36.00000000	0.95388889	8.60377797	0.789602
37	0.05925906	9.01341440	0.53412644		37.00000000	0.92810811	8.36542299	0.810948
38	0.06937363	9.01442910	0.62536367		38.00000000	0.90368421	8.14619724	0.832333
39	0.07951128	9.01504990	0.71679813		39.00000000	0.88051282	7.93786701	0.853811
40	0.08932369	9.01346780	0.80511616		40.00000000	0.85850000	7.73806211	0.875195
41	0.09949706	9.01160340	0.89662802		41.00000000	0.83756098	7.54776734	0.896556
42	0.10930648	9.00814250	0.98464835		42.00000000	0.81761905	7.36522889	0.917931
43	0.11947837	9.02052690	1.07775785		43.00000000	0.79860465	7.20383474	0.939412
44	0.12928928	9.00622180	1.16440793		44.00000000	0.78045455	7.02894674	0.960798
45	0.13940683	9.00774670	1.25574141		45.00000000	0.76311111	6.87391159	0.982148
46	0.14923039	9.00933550	1.34446665		46.00000000	0.74652174	6.72566481	1.003523
47	0.15937623	9.02497480	1.43836646		47.00000000	0.73063830	6.59399223	1.025002
48	0.16956300	9.00365830	1.52668731		48.00000000	0.71541667	6.44136721	1.046397
49	0.17936274	9.01927850	1.61772250		49.00000000	0.70081633	6.32085763	1.067773
50	0.18951082	9.01064870	1.70761542		50.00000000	0.68680000	6.18851353	1.089132
51	0.19928080	9.01225470	1.79596933		51.00000000	0.67333333	6.06825150	1.110619
52	0.20944300	9.01576900	1.88828971		52.00000000	0.66038462	5.95387514	1.132006
53	0.21925391	9.01908870	1.97747046		53.00000000	0.64792453	5.84368879	1.153387
54	0.22938487	9.01134970	2.06706728		54.00000000	0.63592593	5.73055090	1.174738
55	0.23922257	9.00897500	2.15515015		55.00000000	0.62436364	5.62487639	1.196202
56	0.24937809	9.02018360	2.24943616		56.00000000	0.61321429	5.53130544	1.217579
57	0.25950158	9.00027850	2.33558649		57.00000000	0.60245614	5.42227305	1.238948
58	0.26934749	9.01650710	2.42857356		58.00000000	0.59206897	5.33839403	1.260431
59	0.27947247	9.01463600	2.51934259		59.00000000	0.58203390	5.24682373	1.281809
60	0.28927892	9.01539230	2.60796295		60.00000000	0.57233333	5.15980953	1.303164
61	0.29945081	9.00614640	2.69689783		61.00000000	0.56295082	5.07001750	1.324531
62	0.30925950	9.01330090	2.78744893		62.00000000	0.55387097	4.99220569	1.346006
63	0.31944925	9.01457600	2.87969954		63.00000000	0.54507937	4.91365936	1.367405
64	0.32927206	9.01411060	2.96809477		64.00000000	0.53656250	4.83663372	1.388748
65	0.33943501	8.99981310	3.05485165		65.00000000	0.52830769	4.75467049	1.410115
66	0.34924594	9.01625630	3.14889091		66.00000000	0.52030303	4.69118547	1.431608
67	0.35938358	9.00277710	3.23545026		67.00000000	0.51253731	4.61425919	1.452976
68	0.36953610	9.01889320	3.33280662		68.00000000	0.50500000	4.55454107	1.474320
69	0.37937382	9.00144000	3.41491068		69.00000000	0.49768116	4.47984710	1.495697
70	0.38948244	9.01768020	3.51222809		70.00000000	0.49057143	4.42381626	1.517167
71	0.39933726	8.98954770	3.58986135		71.00000000	0.48366197	4.34790237	1.538563
72	0.40948161	9.01169400	3.69012297		72.00000000	0.47694444	4.29807739	1.559919
73	0.41931707	8.99986650	3.77379765		73.00000000	0.47041096	4.23363583	1.581285
74	0.42944133	8.99660020	3.86351196		74.00000000	0.46405405	4.17490880	1.602767
75	0.43927383	9.00875470	3.95731018		75.00000000	0.45786667	4.12480849	1.624142
76	0.44945091	8.99089430	4.04096562		76.00000000	0.45184211	4.06246461	1.645492
77	0.45954317	8.98933220	4.13098622		77.00000000	0.44597403	4.00900867	1.666875
78	0.46942180	8.99061390	4.22039016		78.00000000	0.44025641	3.95817540	1.688351
79	0.47953117	8.98213480	4.30721361		79.00000000	0.43468354	3.90438619	1.709732
80	0.48936442	8.96870990	4.38896752		80.00000000	0.42925000	3.84981872	1.731100
81	0.49948272	8.95824810	4.47449013		81.00000000	0.42395062	3.79785481	1.752460
82	0.50932562	8.93246750	4.54953455		82.00000000	0.41878049	3.74074310	1.773928
83	0.51945359	8.92126270	4.63418194		83.00000000	0.41373494	3.69103809	1.795316
84	0.52921909	8.87976740	4.69934242		84.00000000	0.40880952	3.63013348	1.816706
85	0.53933889	8.82548620	4.75992793		85.00000000	0.40400000	3.56549642	1.838051
86	0.54950333	8.74228100	4.80391252		86.00000000	0.39930233	3.49081313	1.859524
87	0.55935073	8.65547940	4.84144872		87.00000000	0.39471264	3.41642716	1.880890
88	0.56948316	8.49918940	4.84014524		88.00000000	0.39022727	3.31661550	1.902276
89	0.57926953	8.31873230	4.81878815		89.00000000	0.38584270	3.20972210	1.923761
90	0.58937067	8.02449320	4.72940093		90.00000000	0.38155556	3.06178996	1.945129
91	0.59921807	7.67932510	4.60159037		91.00000000	0.37736264	2.89789037	1.966499
92	0.60931998	7.18634560	4.37878396		92.00000000	0.37326087	2.68238161	1.987967
93	0.61913460	6.54796700	4.05407293		93.00000000	0.36924731	2.41781921	2.009473
94	0.62925071	5.69066100	3.58085247		94.00000000	0.36531915	2.07890743	2.030862
95	0.63933700	4.60708950	2.94548278		95.00000000	0.36147368	1.66534162	2.052213
96	0.64914417	3.29508040	2.13898223		96.00000000	0.35770833	1.17867772	2.073592
97	0.65926468	1.60641220	1.05905082		97.00000000	0.35402062	0.56870304	2.095082
98	0.66896772	-0.35042718	-0.23442447		98.00000000	0.35040816	-0.12279254	2.116512
99	0.67908454	-2.75771670	-1.87272278		99.00000000	0.34686869	-0.95656557	2.137887
100	0.68879795	-5.50303790	-3.79048122		100.00000000	0.34340000	-1.88974321	2.159285
101	0.69907254	-8.83608630	-6.17706529		101.00000000	0.34000000	-3.00426934	2.180769
18:15 02/04/2018
Test Lot:	JK-PERC
Recipe:	Recipe_YJX-LID
Cell Name:	1-30-3h
Test Order:	3
Test Condition:	Light
1	-0.29996210	9.00658890	-2.70163532		1.00000000	34.34000000	309.28626283	0.000000
2	-0.29013085	9.01476670	-2.61546193		2.00000000	17.17000000	154.78354424	0.061784
3	-0.27997729	9.01765730	-2.52473925		3.00000000	11.44666667	103.22211723	0.083185
4	-0.27018771	9.01229670	-2.43501181		4.00000000	8.58500000	77.37056717	0.104660
5	-0.26001334	9.01512530	-2.34405284		5.00000000	6.86800000	61.91588056	0.126048
6	-0.24986352	9.01388360	-2.25224069		6.00000000	5.72333333	51.58946047	0.147432
7	-0.24002406	9.01905540	-2.16479029		7.00000000	4.90571429	44.24490892	0.168807
8	-0.22988243	9.00832180	-2.07085491		8.00000000	4.29250000	38.66822133	0.190299
9	-0.22006606	9.02267360	-1.98558423		9.00000000	3.81555556	34.42651238	0.211670
10	-0.20992069	9.01390550	-1.89220526		10.00000000	3.43400000	30.95375149	0.233050
11	-0.20010804	9.01602360	-1.80417881		11.00000000	3.12181818	28.14638640	0.254539
12	-0.18992919	9.02103140	-1.71335719		12.00000000	2.86166667	25.81518486	0.275901
13	-0.18016045	9.00483320	-1.62231480		13.00000000	2.64153846	23.78661324	0.297273
14	-0.17001508	9.03013710	-1.53525948		14.00000000	2.45285714	22.14963629	0.318643
15	-0.16019721	9.01458450	-1.44411129		15.00000000	2.28933333	20.63738878	0.340119
16	-0.15006675	9.02059080	-1.35369074		16.00000000	2.14625000	19.36044300	0.361504
17	-0.13993032	9.01367380	-1.26128626		17.00000000	2.02000000	18.20762108	0.382848
18	-0.13010278	9.01587300	-1.17299014		18.00000000	1.90777778	17.20028216	0.404218
19	-0.11995445	9.01085660	-1.08089235		19.00000000	1.80736842	16.28593767	0.425708
20	-0.11014030	9.00945950	-0.99230457		20.00000000	1.71700000	15.46924196	0.447089
21	-0.09997857	9.01840310	-0.90164708		21.00000000	1.63523810	14.74723631	0.468436
22	-0.09016666	9.00327110	-0.81179487		22.00000000	1.56090909	14.05328771	0.489813
23	-0.07999749	9.01337150	-0.72104707		23.00000000	1.49304348	13.45735554	0.511293
24	-0.07020790	9.01970670	-0.63325468		24.00000000	1.43083333	12.90569700	0.532676
25	-0.06005064	9.01597690	-0.54141516		25.00000000	1.37360000	12.38434587	0.554033
26	-0.04989784	9.01312640	-0.44973556		26.00000000	1.32076923	11.90426002	0.575409
27	-0.04007030	9.01480480	-0.36122589		27.00000000	1.27185185	11.46549618	0.596885
28	-0.02994355	9.01917740	-0.27006617		28.00000000	1.22642857	11.06137685	0.618263
29	-0.02012121	9.01373860	-0.18136735		29.00000000	1.18413793	10.67350978	0.639614
30	-0.00996842	9.01793380	-0.08989451		30.00000000	1.14466667	10.32252822	0.660991
31	-0.00064177	9.00364490	-0.00577831		31.00000000	1.10774194	9.97371503	0.682592
32	0.00950784	9.02720170	0.08582917		32.00000000	1.07312500	9.68731582	0.703966
33	0.01930831	8.99616720	0.17370077		33.00000000	1.04060606	9.36146611	0.725337
34	0.02945561	9.01746850	0.26561500		34.00000000	1.01000000	9.10764319	0.746710
35	0.03929627	9.00862030	0.35400517		35.00000000	0.98114286	8.83874346	0.768187
36	0.04942942	9.01539610	0.44562584		36.00000000	0.95388889	8.59968617	0.789594
37	0.05923957	9.00905420	0.53369253		37.00000000	0.92810811	8.36137625	0.810966
38	0.06936827	9.02022550	0.62571740		38.00000000	0.90368421	8.15143536	0.832333
39	0.07952375	9.00609210	0.71619822		39.00000000	0.88051282	7.92997956	0.853810
40	0.08936292	9.01181600	0.80532218		40.00000000	0.85850000	7.73664404	0.875189
41	0.09951022	9.01922890	0.89750548		41.00000000	0.83756098	7.55415416	0.896574
42	0.10932036	9.00241370	0.98414711		42.00000000	0.81761905	7.36054492	0.918061
43	0.11946990	9.00826840	1.07621692		43.00000000	0.79860465	7.19404504	0.939437
44	0.12929791	9.01067260	1.16506113		44.00000000	0.78045455	7.03242039	0.960806
45	0.13944744	9.00279240	1.25541635		45.00000000	0.76311111	6.87013091	0.982180
46	0.14926355	9.00708290	1.34442917		46.00000000	0.74652174	6.72398319	1.003655
47	0.15940489	9.01160720	1.43649425		47.00000000	0.73063830	6.58422535	1.025045
48	0.16953358	9.01074310	1.52762354		48.00000000	0.71541667	6.44643579	1.046402
49	0.17936903	9.01100640	1.61629548		49.00000000	0.70081633	6.31506040	1.067765
50	0.18947166	9.01155380	1.70743406		50.00000000	0.68680000	6.18913515	1.089254
51	0.19930415	9.01258850	1.79624629		51.00000000	0.67333333	6.06847626	1.110625
52	0.20942166	9.00795750	1.88646141		52.00000000	0.66038462	5.94871655	1.131976
53	0.21926755	9.01997180	1.97778712		53.00000000	0.64792453	5.84426097	1.153355
54	0.22939102	9.00987150	2.06678361		54.00000000	0.63592593	5.72961088	1.174833
55	0.23922797	9.01595970	2.15686974		55.00000000	0.62436364	5.62923738	1.196212
56	0.24934846	9.00890060	2.24635549		56.00000000	0.61321429	5.52438655	1.217546
57	0.25950173	9.01106170	2.33838610		57.00000000	0.60245614	5.42876945	1.238916
58	0.26935726	9.00750730	2.42623749		58.00000000	0.59206897	5.33306553	1.260391
59	0.27950010	9.01462460	2.51958848		59.00000000	0.58203390	5.24681710	1.281757
60	0.28930652	9.00988670	2.60661897		60.00000000	0.57233333	5.15665849	1.303104
61	0.29946795	9.01349350	2.69925242		61.00000000	0.56295082	5.07415355	1.324489
62	0.30930564	8.99954800	2.78361095		62.00000000	0.55387097	4.98458836	1.345962
63	0.31943211	9.01139740	2.87852969		63.00000000	0.54507937	4.91192677	1.367334
64	0.32925490	9.01330950	2.96767632		64.00000000	0.53656250	4.83620388	1.388697
65	0.33942825	9.00650880	3.05706352		65.00000000	0.52830769	4.75820788	1.410047
66	0.34922352	9.01319790	3.14762070		66.00000000	0.52030303	4.68959418	1.431515
67	0.35940504	9.00417420	3.23614559		67.00000000	0.51253731	4.61497525	1.452896
68	0.36952332	9.00734710	3.32842480		68.00000000	0.50500000	4.54871029	1.474273
69	0.37935877	9.00801750	3.41727044		69.00000000	0.49768116	4.48312059	1.495630
70	0.38948151	8.99605660	3.50379771		70.00000000	0.49057143	4.41320834	1.517107
71	0.39933929	9.00107000	3.59448090		71.00000000	0.48366197	4.35347526	1.538518
72	0.40945011	9.00012210	3.68510098		72.00000000	0.47694444	4.29255823	1.559916
73	0.41931906	9.01337150	3.77947846		73.00000000	0.47041096	4.23998873	1.581402
74	0.42942989	8.99074460	3.86089446		74.00000000	0.46405405	4.17219148	1.602773
75	0.43926311	9.01040940	3.95794046		75.00000000	0.45786667	4.12556612	1.624141
76	0.44941637	9.00101660	4.04520421		76.00000000	0.45184211	4.06703829	1.645520
77	0.45952794	8.98755740	4.13003374		77.00000000	0.44597403	4.00821716	1.666988
78	0.46943188	8.98415950	4.21745088		78.00000000	0.44025641	3.95533381	1.688384
79	0.47957322	8.98774430	4.31028147		79.00000000	0.43468354	3.90682455	1.709730
80	0.48933423	8.97002890	4.38934218		80.00000000	0.42925000	3.85038491	1.731102
81	0.49947631	8.94752120	4.46907487		81.00000000	0.42395062	3.79330714	1.752594
82	0.50932145	8.94084360	4.55376343		82.00000000	0.41878049	3.74425084	1.773962
83	0.51945686	8.91668700	4.63183423		83.00000000	0.41373494	3.68914496	1.795329
84	0.52925360	8.87929060	4.69939652		84.00000000	0.40880952	3.62993856	1.816702
85	0.53934956	8.82427980	4.75937143		85.00000000	0.40400000	3.56500904	1.838182
86	0.54952955	8.74751470	4.80701782		86.00000000	0.39930233	3.49290296	1.859569
87	0.55931664	8.64978500	4.83796868		87.00000000	0.39471264	3.41417950	1.880909
88	0.56945872	8.50432590	4.84286254		88.00000000	0.39022727	3.31861990	1.902279
89	0.57926965	8.29622550	4.80575164		89.00000000	0.38584270	3.20103802	1.923764
90	0.58941770	8.05252270	4.74629941		90.00000000	0.38155556	3.07248477	1.945136
91	0.59916008	7.66840700	4.59460335		91.00000000	0.37736264	2.89377029	1.966474
92	0.60930365	7.17445140	4.37141942		92.00000000	0.37326087	2.67794197	1.987944
93	0.61912644	6.54269600	4.05075608		93.00000000	0.36924731	2.41587291	2.009482
94	0.62923956	5.68413880	3.57668500		94.00000000	0.36531915	2.07652475	2.030869
95	0.63937044	4.61696960	2.95195388		95.00000000	0.36147368	1.66891301	2.052253
96	0.64913595	3.29006390	2.13569876		96.00000000	0.35770833	1.17688327	2.073616
97	0.65929741	1.60754470	1.05985006		97.00000000	0.35402062	0.56910397	2.095095
98	0.66898847	-0.35958806	-0.24056027		98.00000000	0.35040816	-0.12600259	2.116466
99	0.67905462	-2.75633720	-1.87170351		99.00000000	0.34686869	-0.95608707	2.137840
100	0.68876058	-5.49628020	-3.78562114		100.00000000	0.34340000	-1.88742262	2.159207
101	0.69910955	-8.83490470	-6.17656625		101.00000000	0.34000000	-3.00386760	2.180680
18:15 02/04/2018
Test Lot:	JK-PERC
Recipe:	Recipe_YJX-LID
Cell Name:	1-30-3h
Test Order:	4
Test Condition:	Light
1	-0.29994383	9.02706050	-2.70761110		1.00000000	34.34000000	309.98925757	0.000000
2	-0.29010081	9.00968740	-2.61371761		2.00000000	17.17000000	154.69633266	0.061816
3	-0.27999502	9.01699540	-2.52471381		3.00000000	11.44666667	103.21454068	0.083265
4	-0.27014306	9.01231580	-2.43461457		4.00000000	8.58500000	77.37073114	0.104665
5	-0.25998819	9.02132130	-2.34543700		5.00000000	6.86800000	61.95843469	0.126158
6	-0.24983031	9.00626280	-2.25003743		6.00000000	5.72333333	51.54584409	0.147542
7	-0.24002001	9.01252750	-2.16318694		7.00000000	4.90571429	44.21288491	0.168922
8	-0.22985843	9.02107240	-2.07356954		8.00000000	4.29250000	38.72295328	0.190276
9	-0.22005260	9.02068330	-1.98502481		9.00000000	3.81555556	34.41891828	0.211759
10	-0.20987314	9.00593850	-1.89010459		10.00000000	3.43400000	30.92639281	0.233133
11	-0.20008294	9.02541640	-1.80583185		11.00000000	3.12181818	28.17570902	0.254530
12	-0.18993178	9.01352410	-1.71195468		12.00000000	2.86166667	25.79370147	0.276001
13	-0.18014827	9.01831050	-1.62463303		13.00000000	2.64153846	23.82221404	0.297459
14	-0.17000157	9.01379390	-1.53235911		14.00000000	2.45285714	22.10954875	0.318845
15	-0.16016969	9.00568870	-1.44243837		15.00000000	2.28933333	20.61702333	0.340223
16	-0.15002002	9.02466390	-1.35388026		16.00000000	2.14625000	19.36918490	0.361566
17	-0.13988745	9.00941850	-1.26030458		17.00000000	2.02000000	18.19902537	0.383054
18	-0.13004591	9.02016930	-1.17303612		18.00000000	1.90777778	17.20847854	0.404433
19	-0.11990738	9.00362400	-1.07960096		19.00000000	1.80736842	16.27286569	0.425836
20	-0.11009932	9.02756400	-0.99392866		20.00000000	1.71700000	15.50032739	0.447201
21	-0.09993848	9.00557520	-0.90000345		21.00000000	1.63523810	14.72625964	0.468676
22	-0.09012447	9.01533990	-0.81250269		22.00000000	1.56090909	14.07212601	0.490059
23	-0.07999711	9.00835900	-0.72064266		23.00000000	1.49304348	13.44987165	0.511446
24	-0.07018161	9.01983260	-0.63302636		24.00000000	1.43083333	12.90587715	0.532794
25	-0.06002151	9.00853250	-0.54070568		25.00000000	1.37360000	12.37412024	0.554274
26	-0.04986587	9.01166630	-0.44937456		26.00000000	1.32076923	11.90233157	0.575637
27	-0.04004441	9.02185820	-0.36127501		27.00000000	1.27185185	11.47446706	0.597022
28	-0.02991631	9.01125050	-0.26958340		28.00000000	1.22642857	11.05165508	0.618514
29	-0.02007774	9.00989910	-0.18089842		29.00000000	1.18413793	10.66896328	0.639885
30	-0.00995262	9.01348880	-0.08970783		30.00000000	1.14466667	10.31744018	0.661230
31	-0.00065811	9.00954530	-0.00592927		31.00000000	1.10774194	9.98025115	0.682723
32	0.00947053	9.01252940	0.08535339		32.00000000	1.07312500	9.67157061	0.704203
33	0.01930882	9.01715560	0.17411063		33.00000000	1.04060606	9.38330677	0.725585
34	0.02945300	9.01230910	0.26543956		34.00000000	1.01000000	9.10243219	0.746945
35	0.03928683	9.02159120	0.35442972		35.00000000	0.98114286	8.85146977	0.768318
36	0.04942953	9.00343700	0.44503561		36.00000000	0.95388889	8.58827852	0.789790
37	0.05924773	9.01194000	0.53393694		37.00000000	0.92810811	8.36405458	0.811165
38	0.06943284	9.01500610	0.62593748		38.00000000	0.90368421	8.14671867	0.832513
39	0.07955172	9.01388260	0.71706986		39.00000000	0.88051282	7.93683919	0.853887
40	0.08935801	9.00692650	0.80484102		40.00000000	0.85850000	7.73244640	0.875359
41	0.09953568	9.01500890	0.89731505		41.00000000	0.83756098	7.55061965	0.896741
42	0.10934421	9.00330160	0.98445890		42.00000000	0.81761905	7.36127088	0.918100
43	0.11951370	9.01168160	1.07701941		43.00000000	0.79860465	7.19677084	0.939479
44	0.12930213	9.00675960	1.16459320		44.00000000	0.78045455	7.02936647	0.960957
45	0.13946193	9.01666450	1.25748143		45.00000000	0.76311111	6.88071687	0.982340
46	0.14927791	9.01687150	1.34601973		46.00000000	0.74652174	6.73129059	1.003685
47	0.15941836	9.01500420	1.43715718		47.00000000	0.73063830	6.58670732	1.025056
48	0.16956925	9.01003740	1.52782528		48.00000000	0.71541667	6.44593092	1.046549
49	0.17939489	9.00521090	1.61548882		49.00000000	0.70081633	6.31099882	1.067924
50	0.18953907	9.01537610	1.70876600		50.00000000	0.68680000	6.19176031	1.089325
51	0.19933346	9.00670340	1.79533735		51.00000000	0.67333333	6.06451362	1.110693
52	0.20948136	9.01691820	1.88887629		52.00000000	0.66038462	5.95463406	1.132166
53	0.21928096	8.99941350	1.97340003		53.00000000	0.64792453	5.83094075	1.153552
54	0.22940727	9.02127460	2.06954598		54.00000000	0.63592593	5.73686240	1.174931
55	0.23926045	9.01468560	2.15685773		55.00000000	0.62436364	5.62844188	1.196281
56	0.24940315	9.01097200	2.24736480		56.00000000	0.61321429	5.52565676	1.217756
57	0.25952947	9.01439480	2.33950110		57.00000000	0.60245614	5.43077750	1.239126
58	0.26934916	9.00669000	2.42594439		58.00000000	0.59206897	5.33258163	1.260501
59	0.27952981	9.01938340	2.52118653		59.00000000	0.58203390	5.24958688	1.281993
60	0.28930411	9.00116920	2.60407524		60.00000000	0.57233333	5.15166917	1.303368
61	0.29949665	9.00719740	2.69762545		61.00000000	0.56295082	5.07060916	1.324717
62	0.30930963	9.00981710	2.78682319		62.00000000	0.55387097	4.99027612	1.346094
63	0.31942183	8.99719520	2.87390056		63.00000000	0.54507937	4.90418545	1.367582
64	0.32928988	9.01941010	2.97000047		64.00000000	0.53656250	4.83947723	1.388960
65	0.33943629	8.99605560	3.05358774		65.00000000	0.52830769	4.75268537	1.410306
66	0.34925154	9.00813670	3.14610562		66.00000000	0.52030303	4.68696082	1.431680
67	0.35941133	9.02024270	3.24197743		67.00000000	0.51253731	4.62321096	1.453165
68	0.36954585	9.00504110	3.32777557		68.00000000	0.50500000	4.54754576	1.474554
69	0.37939382	9.00951670	3.41815496		69.00000000	0.49768116	4.48386672	1.495904
70	0.38954246	9.00119880	3.50634912		70.00000000	0.49057143	4.41573095	1.517287
71	0.39934951	9.00472550	3.59603272		71.00000000	0.48366197	4.35524329	1.538768
72	0.40950558	9.00201990	3.68637738		72.00000000	0.47694444	4.29346338	1.560148
73	0.41931933	9.00261400	3.77497007		73.00000000	0.47041096	4.23492828	1.581509
74	0.42945233	8.99406620	3.86252269		74.00000000	0.46405405	4.17373288	1.602890
75	0.43930104	8.99711230	3.95244079		75.00000000	0.45786667	4.11947782	1.624357
76	0.44942811	9.00171280	4.04562277		76.00000000	0.45184211	4.06735286	1.645749
77	0.45954627	8.99310490	4.13274781		77.00000000	0.44597403	4.01069120	1.667084
78	0.46945080	8.98673820	4.21883144		78.00000000	0.44025641	3.95646910	1.688495
79	0.47958678	8.98765280	4.31035947		79.00000000	0.43468354	3.90678477	1.709979
80	0.48939681	8.97125240	4.39050231		80.00000000	0.42925000	3.85091009	1.731360
81	0.49954173	8.95853900	4.47516407		81.00000000	0.42395062	3.79797814	1.752733
82	0.50936067	8.92605880	4.54658329		82.00000000	0.41878049	3.73805926	1.774098
83	0.51950115	8.91078660	4.62916389		83.00000000	0.41373494	3.68670376	1.795584
84	0.52923894	8.86591150	4.69218560		84.00000000	0.40880952	3.62446906	1.816971
85	0.53940028	8.81796930	4.75641511		85.00000000	0.40400000	3.56245960	1.838353
86	0.54953551	8.73922060	4.80251205		86.00000000	0.39930233	3.48959111	1.859720
87	0.55933213	8.64193920	4.83371426		87.00000000	0.39471264	3.41108267	1.881191
88	0.56947851	8.50159840	4.84147759		88.00000000	0.39022727	3.31755556	1.902574
89	0.57927740	8.30294130	4.80970625		89.00000000	0.38584270	3.20362926	1.923955
90	0.58942157	8.02494720	4.73007698		90.00000000	0.38155556	3.06196319	1.945443
91	0.59923458	7.66987610	4.59605498		91.00000000	0.37736264	2.89432467	1.966820
92	0.60932291	7.16809510	4.36768457		92.00000000	0.37326087	2.67556941	1.988282
93	0.61916864	6.54210230	4.05066458		93.00000000	0.36924731	2.41565369	2.009702
94	0.62922722	5.68435100	3.57674838		94.00000000	0.36531915	2.07660227	2.031196
95	0.63938707	4.59797000	2.93988257		95.00000000	0.36147368	1.66204516	2.052635
96	0.64920229	3.27115200	2.12363937		96.00000000	0.35770833	1.17011833	2.073996
97	0.65927428	1.59216450	1.04967310		97.00000000	0.35402062	0.56365906	2.095377
98	0.66903514	-0.36317161	-0.24297457		98.00000000	0.35040816	-0.12725830	2.116878
99	0.67905056	-2.78254440	-1.88948833		99.00000000	0.34686869	-0.96517752	2.138246
100	0.68878245	-5.51081940	-3.79575569		100.00000000	0.34340000	-1.89241538	2.159589
101	0.69906431	-8.84183600	-6.18101198		101.00000000	0.34000000	-3.00622424	2.180971
