# Supplementary material for: Study on the Electrical Injection Regeneration of Industrialized B-Doped Czochralski Silicon PERC Solar Cells
Source: Hindawi journal article supplement (doi:10.1155/2019/5357370), 2019-06-20
Supplement: f1 [file 5357370.f1.zip › section3.2/IVRawData_1-30-4h.csv]

19:17 02/04/2018
Test Lot:	JK-PERC
Recipe:	Recipe_YJX-LID
Cell Name:	1-30-4h
Test Order:	2
Test Condition:	Light
1	-0.29981014	9.05180550	-2.71382307		1.00000000	34.34000000	310.83900087	0.000000
2	-0.29004711	9.05372620	-2.62600712		2.00000000	17.17000000	155.45247885	0.061738
3	-0.27991784	9.04815960	-2.53274129		3.00000000	11.44666667	103.57126689	0.083249
4	-0.27011088	9.05082420	-2.44472609		4.00000000	8.58500000	77.70132576	0.104623
5	-0.25991538	9.05396650	-2.35326514		5.00000000	6.86800000	62.18264192	0.125967
6	-0.24979432	9.05631350	-2.26221567		6.00000000	5.72333333	51.83230093	0.147441
7	-0.24000746	9.06190400	-2.17492456		7.00000000	4.90571429	44.45511191	0.168929
8	-0.22981419	9.04136560	-2.07783411		8.00000000	4.29250000	38.81006184	0.190305
9	-0.21999234	9.05679040	-1.99242451		9.00000000	3.81555556	34.55668693	0.211663
10	-0.20983407	9.03775600	-1.89642913		10.00000000	3.43400000	31.03565410	0.233040
11	-0.20004943	9.05658340	-1.81176435		11.00000000	3.12181818	28.27300672	0.254528
12	-0.18989711	9.05840780	-1.72016546		12.00000000	2.86166667	25.92214365	0.275917
13	-0.18009087	9.03621390	-1.62733962		13.00000000	2.64153846	23.86950656	0.297256
14	-0.16997726	9.06469540	-1.54079209		14.00000000	2.45285714	22.23440286	0.318628
15	-0.16014722	9.04341790	-1.44827824		15.00000000	2.28933333	20.70339805	0.340109
16	-0.14997703	9.05585960	-1.35817093		16.00000000	2.14625000	19.43613867	0.361479
17	-0.13982172	9.04703140	-1.26497149		17.00000000	2.02000000	18.27500343	0.382820
18	-0.13001849	9.05754470	-1.17764829		18.00000000	1.90777778	17.27978250	0.404198
19	-0.11989295	9.04481510	-1.08440956		19.00000000	1.80736842	16.34731319	0.425675
20	-0.11009120	9.05344960	-0.99670513		20.00000000	1.71700000	15.54477296	0.447059
21	-0.09991208	9.04965310	-0.90416964		21.00000000	1.63523810	14.79833750	0.468423
22	-0.09006865	9.03907110	-0.81413690		22.00000000	1.56090909	14.10916825	0.489779
23	-0.07990069	9.06254100	-0.72410327		23.00000000	1.49304348	13.53076774	0.511250
24	-0.07011531	9.04188440	-0.63397448		24.00000000	1.43083333	12.93742960	0.532642
25	-0.05992428	9.05582430	-0.54266373		25.00000000	1.37360000	12.43908026	0.554020
26	-0.04979652	9.04495720	-0.45040737		26.00000000	1.32076923	11.94630116	0.575377
27	-0.03999699	9.05590440	-0.36220894		27.00000000	1.27185185	11.51776878	0.596854
28	-0.02984020	9.04679110	-0.26995808		28.00000000	1.22642857	11.09524308	0.618223
29	-0.02000793	9.04893400	-0.18105045		29.00000000	1.18413793	10.71518598	0.639620
30	-0.00986975	9.04675770	-0.08928922		30.00000000	1.14466667	10.35552198	0.661106
31	-0.00068725	9.03747370	-0.00621104		31.00000000	1.10774194	10.01118861	0.682618
32	0.00947454	9.05383300	0.08578090		32.00000000	1.07312500	9.71589454	0.703973
33	0.01927676	9.04859160	0.17442754		33.00000000	1.04060606	9.41601926	0.725348
34	0.02941093	9.05555530	0.26633232		34.00000000	1.01000000	9.14611085	0.746830
35	0.03926972	9.04779050	0.35530419		35.00000000	0.98114286	8.87717502	0.768199
36	0.04939422	9.04966450	0.44700108		36.00000000	0.95388889	8.63237441	0.789555
37	0.05923365	9.05276200	0.53622814		37.00000000	0.92810811	8.40194181	0.810935
38	0.06935145	9.04615020	0.62736363		38.00000000	0.90368421	8.17486310	0.832419
39	0.07952134	9.06142330	0.72057655		39.00000000	0.88051282	7.97869939	0.853788
40	0.08932878	9.05164910	0.80857278		40.00000000	0.85850000	7.77084075	0.875145
41	0.09948155	9.06141280	0.90144342		41.00000000	0.83756098	7.58948575	0.896530
42	0.10929717	9.05311200	0.98947952		42.00000000	0.81761905	7.40199681	0.918013
43	0.11943804	9.04693410	1.08054808		43.00000000	0.79860465	7.22492365	0.939408
44	0.12927152	9.05436420	1.17047142		44.00000000	0.78045455	7.06651970	0.960753
45	0.13941909	9.05082610	1.26185794		45.00000000	0.76311111	6.90678596	0.982124
46	0.14922653	9.04894730	1.35034301		46.00000000	0.74652174	6.75523588	1.003615
47	0.15937410	9.04929730	1.44222361		47.00000000	0.73063830	6.61176318	1.025006
48	0.16951273	9.04194830	1.53272534		48.00000000	0.71541667	6.46876051	1.046366
49	0.17936780	9.06861210	1.62661700		49.00000000	0.70081633	6.35543142	1.067740
50	0.18949825	9.05999760	1.71685369		50.00000000	0.68680000	6.22240635	1.089208
51	0.19929154	9.04605290	1.80280181		51.00000000	0.67333333	6.09100895	1.110597
52	0.20942274	9.03396420	1.89191754		52.00000000	0.66038462	5.96589097	1.131967
53	0.21925993	9.04876520	1.98403162		53.00000000	0.64792453	5.86291692	1.153341
54	0.22937624	9.04284100	2.07421287		54.00000000	0.63592593	5.75057704	1.174814
55	0.23925141	9.06196690	2.16808836		55.00000000	0.62436364	5.65796261	1.196181
56	0.24938111	9.04534440	2.25573803		56.00000000	0.61321429	5.54673441	1.217569
57	0.25952795	9.04383370	2.34712762		57.00000000	0.60245614	5.44851314	1.238927
58	0.26936066	9.05460450	2.43895424		58.00000000	0.59206897	5.36095032	1.260406
59	0.27951121	9.04601000	2.52846120		59.00000000	0.58203390	5.26508446	1.281787
60	0.28933576	9.05703260	2.62052341		60.00000000	0.57233333	5.18364166	1.303179
61	0.29946399	9.04699420	2.70924898		61.00000000	0.56295082	5.09301280	1.324670
62	0.30929896	9.04499340	2.79760705		62.00000000	0.55387097	5.00975925	1.346066
63	0.31942272	9.04805950	2.89015578		63.00000000	0.54507937	4.93191053	1.367416
64	0.32925099	9.05249980	2.98054452		64.00000000	0.53656250	4.85723192	1.388783
65	0.33941641	9.05818370	3.07449619		65.00000000	0.52830769	4.78550813	1.410270
66	0.34920153	9.04333110	3.15794506		66.00000000	0.52030303	4.70527258	1.431653
67	0.35938182	9.04644680	3.25112852		67.00000000	0.51253731	4.63664154	1.452993
68	0.36953759	9.04279420	3.34165238		68.00000000	0.50500000	4.56661107	1.474376
69	0.37937331	9.04642010	3.43197034		69.00000000	0.49768116	4.50223284	1.495849
70	0.38951492	9.04661560	3.52379175		70.00000000	0.49057143	4.43801114	1.517221
71	0.39931640	9.04019070	3.60989641		71.00000000	0.48366197	4.37239646	1.538598
72	0.40946546	9.03874870	3.70105539		72.00000000	0.47694444	4.31098098	1.559973
73	0.41930115	9.03710370	3.78926797		73.00000000	0.47041096	4.25115262	1.581450
74	0.42943087	9.04170130	3.88278566		74.00000000	0.46405405	4.19583814	1.602832
75	0.43924797	9.04287240	3.97206334		75.00000000	0.45786667	4.14042984	1.624180
76	0.44940150	9.02956200	4.05789871		76.00000000	0.45184211	4.07993630	1.645572
77	0.45953420	9.01903340	4.14455430		77.00000000	0.44597403	4.02225464	1.667048
78	0.46939892	9.03773120	4.24230126		78.00000000	0.44025641	3.97891909	1.688413
79	0.47955245	9.00623510	4.31896211		79.00000000	0.43468354	3.91486219	1.709769
80	0.48935094	9.01901820	4.41346503		80.00000000	0.42925000	3.87141356	1.731145
81	0.49950969	8.98559670	4.48839262		81.00000000	0.42395062	3.80944927	1.752621
82	0.50931937	8.96470360	4.56589719		82.00000000	0.41878049	3.75424295	1.774010
83	0.51943415	8.95113950	4.64952754		83.00000000	0.41373494	3.70339916	1.795363
84	0.52923936	8.90542700	4.71310249		84.00000000	0.40880952	3.64062337	1.816716
85	0.53938025	8.86478140	4.78148801		85.00000000	0.40400000	3.58137169	1.838183
86	0.54951888	8.78269860	4.82625870		86.00000000	0.39930233	3.50695198	1.859564
87	0.55934191	8.69445510	4.86317312		87.00000000	0.39471264	3.43181136	1.880936
88	0.56945676	8.54997540	4.86884129		88.00000000	0.39022727	3.33643358	1.902301
89	0.57925898	8.34941010	4.83647078		89.00000000	0.38584270	3.22155891	1.923780
90	0.58939910	8.08114050	4.76301694		90.00000000	0.38155556	3.08340405	1.945170
91	0.59920651	7.72484110	4.62877508		91.00000000	0.37736264	2.91506641	1.966559
92	0.60930943	7.22408200	4.40170129		92.00000000	0.37326087	2.69646713	1.988097
93	0.61914366	6.60121540	4.08710066		93.00000000	0.36924731	2.43748104	2.009509
94	0.62922651	5.74494460	3.61487144		94.00000000	0.36531915	2.09873827	2.030871
95	0.63935691	4.65612270	2.97692422		95.00000000	0.36147368	1.68306583	2.052245
96	0.64913982	3.34637900	2.17226786		96.00000000	0.35770833	1.19702765	2.073748
97	0.65925688	1.64619120	1.08526287		97.00000000	0.35402062	0.58278563	2.095117
98	0.66897649	-0.32274127	-0.21590632		98.00000000	0.35040816	-0.11309118	2.116460
99	0.67905778	-2.74831560	-1.86626509		99.00000000	0.34686869	-0.95330462	2.137868
100	0.68880194	-5.51405530	-3.79809199		100.00000000	0.34340000	-1.89352659	2.159380
101	0.69907606	-8.85708330	-6.19177490		101.00000000	0.34000000	-3.01140832	2.180767
19:17 02/04/2018
Test Lot:	JK-PERC
Recipe:	Recipe_YJX-LID
Cell Name:	1-30-4h
Test Order:	3
Test Condition:	Light
1	-0.29985285	9.05312630	-2.71460572		1.00000000	34.34000000	310.88435714	0.000000
2	-0.29000789	9.04356580	-2.62270544		2.00000000	17.17000000	155.27802479	0.061798
3	-0.27990168	9.04869560	-2.53274510		3.00000000	11.44666667	103.57740230	0.083223
4	-0.27009541	9.04997060	-2.44435552		4.00000000	8.58500000	77.69399760	0.104726
5	-0.25990584	9.05430980	-2.35326799		5.00000000	6.86800000	62.18499971	0.126112
6	-0.24976018	9.04823210	-2.25988808		6.00000000	5.72333333	51.78604839	0.147460
7	-0.23991448	9.05726720	-2.17296955		7.00000000	4.90571429	44.43236509	0.168831
8	-0.22982614	9.04252430	-2.07820846		8.00000000	4.29250000	38.81503556	0.190322
9	-0.21994843	9.04884910	-1.99028015		9.00000000	3.81555556	34.52638645	0.211689
10	-0.20983626	9.04833220	-1.89866819		10.00000000	3.43400000	31.07197277	0.233042
11	-0.19999205	9.04478550	-1.80888519		11.00000000	3.12181818	28.23617582	0.254410
12	-0.18987839	9.06511020	-1.72126853		12.00000000	2.86166667	25.94132369	0.275885
13	-0.18007140	9.05232520	-1.63006487		13.00000000	2.64153846	23.91206518	0.297313
14	-0.16991457	9.04736230	-1.53727867		14.00000000	2.45285714	22.19188724	0.318667
15	-0.16011502	9.06320760	-1.45115567		15.00000000	2.28933333	20.74870327	0.340075
16	-0.14999987	9.04423810	-1.35663454		16.00000000	2.14625000	19.41119602	0.361558
17	-0.13981402	9.04654980	-1.26483449		17.00000000	2.02000000	18.27403060	0.382939
18	-0.13001966	9.05005460	-1.17668502		18.00000000	1.90777778	17.26549305	0.404294
19	-0.11985391	9.05326650	-1.08506939		19.00000000	1.80736842	16.36258798	0.425669
20	-0.11000970	9.05080700	-0.99567656		20.00000000	1.71700000	15.54023562	0.447133
21	-0.09988190	9.04046540	-0.90297888		21.00000000	1.63523810	14.78331342	0.468518
22	-0.09000569	9.04730220	-0.81430866		22.00000000	1.56090909	14.12201625	0.489869
23	-0.07990394	9.03723910	-0.72211099		23.00000000	1.49304348	13.49299090	0.511246
24	-0.07007164	9.03813360	-0.63331683		24.00000000	1.43083333	12.93206283	0.532719
25	-0.05990141	9.05971150	-0.54268952		25.00000000	1.37360000	12.44441972	0.554108
26	-0.04979743	9.05224510	-0.45077858		26.00000000	1.32076923	11.95592680	0.575503
27	-0.03993833	9.05600830	-0.36168188		27.00000000	1.27185185	11.51790093	0.596873
28	-0.02980607	9.04471870	-0.26958754		28.00000000	1.22642857	11.09270143	0.618348
29	-0.01997600	9.05711170	-0.18092485		29.00000000	1.18413793	10.72486951	0.639727
30	-0.00986830	9.05004120	-0.08930852		30.00000000	1.14466667	10.35928049	0.661112
31	-0.00062623	9.05667970	-0.00567156		31.00000000	1.10774194	10.03246390	0.682596
32	0.00952145	9.05042460	0.08617320		32.00000000	1.07312500	9.71223690	0.704070
33	0.01933264	9.03426550	0.17465620		33.00000000	1.04060606	9.40111143	0.725432
34	0.02945568	9.07061580	0.26718116		34.00000000	1.01000000	9.16132196	0.746808
35	0.03930706	9.04350090	0.35547341		35.00000000	0.98114286	8.87296631	0.768294
36	0.04946285	9.05274770	0.44777467		36.00000000	0.95388889	8.63531544	0.789676
37	0.05927850	9.04679200	0.53628025		37.00000000	0.92810811	8.39640101	0.811036
38	0.06939931	9.05533410	0.62843389		38.00000000	0.90368421	8.18316245	0.832423
39	0.07956850	9.04254820	0.71950198		39.00000000	0.88051282	7.96207962	0.853900
40	0.08940499	9.06133560	0.81012857		40.00000000	0.85850000	7.77915661	0.875282
41	0.09951165	9.04351430	0.89993506		41.00000000	0.83756098	7.57449466	0.896643
42	0.10933177	9.04370780	0.98876458		42.00000000	0.81761905	7.39430776	0.918023
43	0.11947193	9.04870610	1.08106638		43.00000000	0.79860465	7.22633878	0.939501
44	0.12933299	9.05379390	1.17095424		44.00000000	0.78045455	7.06607460	0.960878
45	0.13944933	9.04544640	1.26138144		45.00000000	0.76311111	6.90268065	0.982233
46	0.14927837	9.05422780	1.35160037		46.00000000	0.74652174	6.75917788	1.003608
47	0.15945426	9.05032630	1.44311308		47.00000000	0.73063830	6.61251500	1.025084
48	0.16955200	9.02996160	1.53104805		48.00000000	0.71541667	6.46018503	1.046456
49	0.17940709	9.05739690	1.62496122		49.00000000	0.70081633	6.34757162	1.067811
50	0.18953088	9.03917880	1.71320351		50.00000000	0.68680000	6.20810800	1.089187
51	0.19931081	9.05447670	1.80465509		51.00000000	0.67333333	6.09668098	1.110659
52	0.20945916	9.05223560	1.89607366		52.00000000	0.66038462	5.97795713	1.132039
53	0.21929565	9.03890510	1.98219257		53.00000000	0.64792453	5.85652832	1.153384
54	0.22944994	9.04769130	2.07599223		54.00000000	0.63592593	5.75366147	1.174757
55	0.23925592	9.05788610	2.16715287		55.00000000	0.62436364	5.65541470	1.196232
56	0.24941023	9.03940390	2.25451981		56.00000000	0.61321429	5.54309161	1.217604
57	0.25957793	9.04992100	2.34915976		57.00000000	0.60245614	5.45218048	1.238964
58	0.26940176	9.04550650	2.43687537		58.00000000	0.59206897	5.35556368	1.260336
59	0.27953449	9.05866530	2.53220938		59.00000000	0.58203390	5.27245028	1.281812
60	0.28938511	9.04636960	2.61788466		60.00000000	0.57233333	5.17753887	1.303200
61	0.29951113	9.04872890	2.71019502		61.00000000	0.56295082	5.09398935	1.324589
62	0.30931190	9.03787520	2.79552235		62.00000000	0.55387097	5.00581668	1.345937
63	0.31949076	9.04991910	2.89136553		63.00000000	0.54507937	4.93292416	1.367414
64	0.32932055	9.03988460	2.97701977		64.00000000	0.53656250	4.85046308	1.388783
65	0.33942720	9.04539490	3.07025306		65.00000000	0.52830769	4.77875171	1.410158
66	0.34923840	9.04452040	3.15869383		66.00000000	0.52030303	4.70589137	1.431648
67	0.35942248	9.05066010	3.25301070		67.00000000	0.51253731	4.63880101	1.453021
68	0.36958644	9.03583430	3.33952183		68.00000000	0.50500000	4.56309632	1.474374
69	0.37937680	9.04939370	3.43313002		69.00000000	0.49768116	4.50371275	1.495757
70	0.38958767	9.03173260	3.51865166		70.00000000	0.49057143	4.43070996	1.517224
71	0.39938694	9.04306510	3.61168210		71.00000000	0.48366197	4.37378670	1.538600
72	0.40951073	9.04324530	3.70330598		72.00000000	0.47694444	4.31312561	1.559967
73	0.41929141	9.03658200	3.78896121		73.00000000	0.47041096	4.25090720	1.581379
74	0.42945611	9.04558660	3.88468243		74.00000000	0.46405405	4.19764113	1.602850
75	0.43928963	9.03177740	3.96756615		75.00000000	0.45786667	4.13534981	1.624233
76	0.44944468	9.03272720	4.05971119		76.00000000	0.45184211	4.08136647	1.645574
77	0.45957294	9.03399660	4.15178038		77.00000000	0.44597403	4.02892783	1.666944
78	0.46946302	9.03109460	4.23976494		78.00000000	0.44025641	3.97599729	1.688428
79	0.47956967	9.01344010	4.32257249		79.00000000	0.43468354	3.91799409	1.709797
80	0.48940095	9.01040170	4.40969915		80.00000000	0.42925000	3.86771493	1.731161
81	0.49952549	8.98831270	4.48989131		81.00000000	0.42395062	3.81060072	1.752529
82	0.50933516	8.97494220	4.57125362		82.00000000	0.41878049	3.75853067	1.774004
83	0.51946568	8.94484230	4.64653859		83.00000000	0.41373494	3.70079379	1.795391
84	0.52929622	8.91116520	4.71664606		84.00000000	0.40880952	3.64296920	1.816749
85	0.53942072	8.86497400	4.78195066		85.00000000	0.40400000	3.58144950	1.838118
86	0.54954451	8.78907490	4.82998786		86.00000000	0.39930233	3.50949805	1.859598
87	0.55934530	8.69652080	4.86435804		87.00000000	0.39471264	3.43262672	1.880979
88	0.56950629	8.54940130	4.86893782		88.00000000	0.39022727	3.33620955	1.902390
89	0.57931823	8.34645650	4.83525441		89.00000000	0.38584270	3.22041928	1.923761
90	0.58945018	8.09341530	4.77066511		90.00000000	0.38155556	3.08808757	1.945233
91	0.59923679	7.72491500	4.62905327		91.00000000	0.37736264	2.91509430	1.966619
92	0.60938221	7.24471090	4.41479794		92.00000000	0.37326087	2.70416709	1.988097
93	0.61917627	6.59433410	4.08305519		93.00000000	0.36924731	2.43494014	2.009488
94	0.62926430	5.75633720	3.62225750		94.00000000	0.36531915	2.10290021	2.030973
95	0.63938957	4.65801620	2.97828698		95.00000000	0.36147368	1.68375028	2.052405
96	0.64915311	3.33725600	2.16639011		96.00000000	0.35770833	1.19376428	2.073797
97	0.65930742	1.64116780	1.08203411		97.00000000	0.35402062	0.58100724	2.095291
98	0.66900176	-0.34481326	-0.23068068		98.00000000	0.35040816	-0.12082538	2.116671
99	0.67908609	-2.78818060	-1.89341466		99.00000000	0.34686869	-0.96713254	2.138017
100	0.68880796	-5.58374640	-3.84612897		100.00000000	0.34340000	-1.91745851	2.159396
101	0.69912302	-8.99182610	-6.28639262		101.00000000	0.34000000	-3.05722087	2.180879
19:18 02/04/2018
Test Lot:	JK-PERC
Recipe:	Recipe_YJX-LID
Cell Name:	1-30-4h
Test Order:	4
Test Condition:	Light
1	-0.29983222	9.05140020	-2.71390142		1.00000000	34.34000000	310.82508287	0.000000
2	-0.29000738	9.04606150	-2.62342459		2.00000000	17.17000000	155.32087596	0.061794
3	-0.27990043	9.05446620	-2.53434898		3.00000000	11.44666667	103.64345644	0.083223
4	-0.27007112	9.04691310	-2.44330995		4.00000000	8.58500000	77.66774896	0.104723
5	-0.25995079	9.04708480	-2.35179684		5.00000000	6.86800000	62.13537841	0.126117
6	-0.24978356	9.04722310	-2.25984759		6.00000000	5.72333333	51.78027354	0.147471
7	-0.23995574	9.04800420	-2.17112054		7.00000000	4.90571429	44.38692346	0.168844
8	-0.22983317	9.05368330	-2.08083673		8.00000000	4.29250000	38.86293557	0.190311
9	-0.22000460	9.04423430	-1.98977315		9.00000000	3.81555556	34.50877843	0.211694
10	-0.20983516	9.05489640	-1.90003563		10.00000000	3.43400000	31.09451424	0.233103
11	-0.20001626	9.05119710	-1.81038659		11.00000000	3.12181818	28.25619167	0.254499
12	-0.18985350	9.04455470	-1.71714037		12.00000000	2.86166667	25.88250070	0.275978
13	-0.18008819	9.04451660	-1.62881062		13.00000000	2.64153846	23.89143846	0.297355
14	-0.16991502	9.04924770	-1.53760310		14.00000000	2.45285714	22.19651186	0.318738
15	-0.16009985	9.04531380	-1.44815338		15.00000000	2.28933333	20.70773839	0.340084
16	-0.14998248	9.04526710	-1.35663159		16.00000000	2.14625000	19.41340451	0.361554
17	-0.13980559	9.05050750	-1.26531154		17.00000000	2.02000000	18.28202515	0.382933
18	-0.12999712	9.04868510	-1.17630300		18.00000000	1.90777778	17.26288035	0.404315
19	-0.11985296	9.05094810	-1.08478292		19.00000000	1.80736842	16.35839778	0.425710
20	-0.11005566	9.04506680	-0.99546080		20.00000000	1.71700000	15.53037970	0.447176
21	-0.09985345	9.04446790	-0.90312131		21.00000000	1.63523810	14.78985846	0.468544
22	-0.09003009	9.04937270	-0.81471583		22.00000000	1.56090909	14.12524811	0.489919
23	-0.07987626	9.04992490	-0.72287415		23.00000000	1.49304348	13.51193135	0.511281
24	-0.07005215	9.04699330	-0.63376137		24.00000000	1.43083333	12.94473958	0.532776
25	-0.05993629	9.04169270	-0.54192551		25.00000000	1.37360000	12.41966909	0.554170
26	-0.04976906	9.03222370	-0.44952531		26.00000000	1.32076923	11.92948315	0.575534
27	-0.03996282	9.05731110	-0.36195573		27.00000000	1.27185185	11.51955790	0.596886
28	-0.02982388	9.03237720	-0.26938054		28.00000000	1.22642857	11.07756547	0.618369
29	-0.01997819	9.05755140	-0.18095352		29.00000000	1.18413793	10.72539018	0.639755
30	-0.00982139	9.04151730	-0.08880024		30.00000000	1.14466667	10.34952347	0.661132
31	-0.00066046	9.05824950	-0.00598264		31.00000000	1.10774194	10.03420283	0.682599
32	0.00952367	9.04704280	0.08616109		32.00000000	1.07312500	9.70860780	0.704076
33	0.01932219	9.03918930	0.17465693		33.00000000	1.04060606	9.40623517	0.725452
34	0.02946308	9.05866150	0.26689604		34.00000000	1.01000000	9.14924812	0.746857
35	0.03926531	9.05281540	0.35546162		35.00000000	0.98114286	8.88210517	0.768340
36	0.04941960	9.05153560	0.44732324		36.00000000	0.95388889	8.63415924	0.789724
37	0.05924044	9.04690650	0.53594274		37.00000000	0.92810811	8.39650728	0.811081
38	0.06935453	9.04237370	0.62712961		38.00000000	0.90368421	8.17145034	0.832459
39	0.07953189	9.04308610	0.71921376		39.00000000	0.88051282	7.96255325	0.853944
40	0.08931626	9.05283360	0.80856528		40.00000000	0.85850000	7.77185765	0.875320
41	0.09951670	9.04322340	0.89995172		41.00000000	0.83756098	7.57425101	0.896668
42	0.10927874	9.05323790	0.98932643		42.00000000	0.81761905	7.40209975	0.918047
43	0.11947098	9.04259200	1.08032733		43.00000000	0.79860465	7.22145603	0.939527
44	0.12930448	9.04795930	1.16994167		44.00000000	0.78045455	7.06152096	0.960895
45	0.13943644	9.05094340	1.26203133		45.00000000	0.76311111	6.90687547	0.982257
46	0.14926770	9.04866700	1.35067371		46.00000000	0.74652174	6.75502663	1.003636
47	0.15942198	9.04703330	1.44229596		47.00000000	0.73063830	6.61010901	1.025110
48	0.16954650	9.05747990	1.53566402		48.00000000	0.71541667	6.47987208	1.046497
49	0.17936213	9.04446130	1.62223384		49.00000000	0.70081633	6.33850614	1.067846
50	0.18954842	9.06466580	1.71819308		50.00000000	0.68680000	6.22561247	1.089218
51	0.19929558	9.03638080	1.80091075		51.00000000	0.67333333	6.08449641	1.110721
52	0.20944911	9.04481700	1.89442887		52.00000000	0.66038462	5.97305800	1.132097
53	0.21929081	9.04659080	1.98383422		53.00000000	0.64792453	5.86150808	1.153465
54	0.22942796	9.03972050	2.07396463		54.00000000	0.63592593	5.74859263	1.174839
55	0.23926519	9.04884720	2.16507414		55.00000000	0.62436364	5.64977114	1.196311
56	0.24941501	9.05583570	2.25866135		56.00000000	0.61321429	5.55316782	1.217715
57	0.25955516	9.05228810	2.34956809		57.00000000	0.60245614	5.45360655	1.239077
58	0.26936409	9.04612540	2.43670134		58.00000000	0.59206897	5.35593011	1.260441
59	0.27952731	9.04789070	2.52913255		59.00000000	0.58203390	5.26617910	1.281918
60	0.28936005	9.04558940	2.61743220		60.00000000	0.57233333	5.17709233	1.303291
61	0.29949424	9.04162410	2.70791434		61.00000000	0.56295082	5.08998970	1.324685
62	0.30929500	9.04022410	2.79609611		62.00000000	0.55387097	5.00711767	1.346040
63	0.31947532	9.05838110	2.89392920		63.00000000	0.54507937	4.93753662	1.367508
64	0.32929990	9.03957840	2.97673226		64.00000000	0.53656250	4.85029879	1.388889
65	0.33944821	9.04610160	3.07068300		65.00000000	0.52830769	4.77912506	1.410278
66	0.34925863	9.05055430	3.16098420		66.00000000	0.52030303	4.70903083	1.431743
67	0.35938391	9.02977280	3.24515506		67.00000000	0.51253731	4.62809549	1.453127
68	0.36957836	9.05488300	3.34648881		68.00000000	0.50500000	4.57271592	1.474483
69	0.37936795	9.04667570	3.43201881		69.00000000	0.49768116	4.50236005	1.495864
70	0.38949770	9.03877540	3.52058223		70.00000000	0.49057143	4.43416496	1.517350
71	0.39935276	9.04530910	3.61226915		71.00000000	0.48366197	4.37487204	1.538726
72	0.40948471	9.03881550	3.70125674		72.00000000	0.47694444	4.31101284	1.560064
73	0.41930407	9.03884220	3.79002332		73.00000000	0.47041096	4.25197043	1.581458
74	0.42946282	9.04182620	3.88312818		74.00000000	0.46405405	4.19589610	1.602937
75	0.43927622	9.02077390	3.96261146		75.00000000	0.45786667	4.13031168	1.624321
76	0.44943124	9.03646760	4.06127084		76.00000000	0.45184211	4.08305654	1.645684
77	0.45958555	9.03017140	4.15013629		77.00000000	0.44597403	4.02722189	1.667061
78	0.46940416	9.02630140	4.23698343		78.00000000	0.44025641	3.97388705	1.688537
79	0.47956589	9.00720500	4.31954828		79.00000000	0.43468354	3.91528379	1.709925
80	0.48935398	9.01428410	4.41117580		80.00000000	0.42925000	3.86938145	1.731279
81	0.49952835	8.99378780	4.49265198		81.00000000	0.42395062	3.81292189	1.752661
82	0.50935364	8.98159030	4.57480571		82.00000000	0.41878049	3.76131477	1.774140
83	0.51948559	8.95268340	4.65079002		83.00000000	0.41373494	3.70403793	1.795515
84	0.52925289	8.91125970	4.71630995		84.00000000	0.40880952	3.64300783	1.816871
85	0.53940940	8.86040310	4.77938472		85.00000000	0.40400000	3.57960285	1.838252
86	0.54957336	8.78599360	4.82854802		86.00000000	0.39930233	3.50826768	1.859743
87	0.55937260	8.69090940	4.86145659		87.00000000	0.39471264	3.43041183	1.881143
88	0.56948745	8.54167080	4.86437432		88.00000000	0.39022727	3.33319290	1.902502
89	0.57931203	8.36358830	4.84512732		89.00000000	0.38584270	3.22702946	1.923865
90	0.58944696	8.08415320	4.76517953		90.00000000	0.38155556	3.08455357	1.945342
91	0.59922683	7.73774480	4.63666429		91.00000000	0.37736264	2.91993578	1.966721
92	0.60931343	7.23853540	4.41053683		92.00000000	0.37326087	2.70186202	1.988208
93	0.61913127	6.61800100	4.09741136		93.00000000	0.36924731	2.44367908	2.009596
94	0.62928480	5.75844340	3.62370090		94.00000000	0.36531915	2.10366964	2.031094
95	0.63936841	4.67264030	2.98753860		95.00000000	0.36147368	1.68903650	2.052477
96	0.64917135	3.33843060	2.16721350		96.00000000	0.35770833	1.19418445	2.073860
97	0.65929365	1.64063910	1.08166294		97.00000000	0.35402062	0.58082007	2.095342
98	0.66895223	-0.35302955	-0.23615990		98.00000000	0.35040816	-0.12370444	2.116733
99	0.67909390	-2.81008670	-1.90831274		99.00000000	0.34686869	-0.97473108	2.138080
100	0.68877852	-5.63175770	-3.87903373		100.00000000	0.34340000	-1.93394559	2.159451
101	0.69912559	-9.07656960	-6.34566208		101.00000000	0.34000000	-3.08603366	2.180940
19:51 02/04/2018
Test Lot:	JK-PERC
Recipe:	Recipe_YJX-LID
Cell Name:	1-30-4h
Test Order:	5
Test Condition:	Light
1	-0.29983714	8.94158840	-2.68102029		1.00000000	34.34000000	307.05414566	0.000000
2	-0.29002887	8.93866630	-2.59247129		2.00000000	17.17000000	153.47690037	0.061792
3	-0.27988714	8.94816590	-2.50447656		3.00000000	11.44666667	102.42667234	0.083211
4	-0.27004093	8.92502020	-2.41012076		4.00000000	8.58500000	76.62129842	0.104705
5	-0.25988731	8.95102410	-2.32625758		5.00000000	6.86800000	61.47563352	0.126084
6	-0.24974559	8.94611260	-2.23425217		6.00000000	5.72333333	51.20158445	0.147432
7	-0.23991129	8.92806240	-2.14194297		7.00000000	4.90571429	43.79852326	0.168805
8	-0.22974873	8.94129470	-2.05425110		8.00000000	4.29250000	38.38050750	0.190290
9	-0.21998140	8.94598100	-1.96794942		9.00000000	3.81555556	34.13388750	0.211668
10	-0.20982778	8.94199090	-1.87627810		10.00000000	3.43400000	30.70679675	0.233033
11	-0.19997485	8.93026260	-1.78582792		11.00000000	3.12181818	27.87865615	0.254411
12	-0.18984878	8.94874000	-1.69890737		12.00000000	2.86166667	25.60831097	0.275869
13	-0.18004498	8.92528920	-1.60695352		13.00000000	2.64153846	23.57649470	0.297261
14	-0.16991442	8.95218560	-1.52110542		14.00000000	2.45285714	21.95843239	0.318609
15	-0.16007043	8.93705080	-1.43055756		15.00000000	2.28933333	20.45988830	0.339979
16	-0.14995255	8.94728760	-1.34166859		16.00000000	2.14625000	19.20311601	0.361464
17	-0.13978998	8.94524000	-1.25045492		17.00000000	2.02000000	18.06938480	0.382835
18	-0.12997502	8.93182950	-1.16091472		18.00000000	1.90777778	17.03994584	0.404193
19	-0.11981322	8.95508100	-1.07293709		19.00000000	1.80736842	16.18513061	0.425566
20	-0.10997518	8.93913080	-0.98308252		20.00000000	1.71700000	15.34848758	0.447038
21	-0.09986547	8.93662360	-0.89246015		21.00000000	1.63523810	14.61350735	0.468416
22	-0.09002222	8.94290730	-0.80506038		22.00000000	1.56090909	13.95906530	0.489784
23	-0.07989837	8.93786910	-0.71412119		23.00000000	1.49304348	13.34462717	0.511143
24	-0.07007895	8.94192600	-0.62664076		24.00000000	1.43083333	12.79440579	0.532620
25	-0.05992384	8.94462590	-0.53599629		25.00000000	1.37360000	12.28633814	0.554000
26	-0.04978213	8.93952080	-0.44502836		26.00000000	1.32076923	11.80704401	0.575375
27	-0.03995748	8.93245030	-0.35691822		27.00000000	1.27185185	11.36075346	0.596731
28	-0.02982471	8.95002270	-0.26693180		28.00000000	1.22642857	10.97656355	0.618199
29	-0.01997550	8.94347480	-0.17865040		29.00000000	1.18413793	10.59030775	0.639567
30	-0.00989110	8.94151020	-0.08844139		30.00000000	1.14466667	10.23504868	0.660947
31	-0.00066859	8.93893720	-0.00597649		31.00000000	1.10774194	9.90203560	0.682542
32	0.00947440	8.94135670	0.08471399		32.00000000	1.07312500	9.59519341	0.703930
33	0.01933672	8.94302560	0.17292879		33.00000000	1.04060606	9.30616664	0.725276
34	0.02944242	8.93848320	0.26317055		34.00000000	1.01000000	9.02786803	0.746658
35	0.03927869	8.94006350	0.35115395		35.00000000	0.98114286	8.77147945	0.768144
36	0.04944467	8.93945790	0.44200853		36.00000000	0.95388889	8.52724956	0.789536
37	0.05925638	8.92722130	0.52899481		37.00000000	0.92810811	8.28542647	0.810877
38	0.06939706	8.94637680	0.62085220		38.00000000	0.90368421	8.08469946	0.832256
39	0.07952210	8.93885330	0.71083641		39.00000000	0.88051282	7.87077493	0.853739
40	0.08942313	8.94578270	0.79995986		40.00000000	0.85850000	7.67995445	0.875106
41	0.09951244	8.93814090	0.88945624		41.00000000	0.83756098	7.48623801	0.896482
42	0.10937998	8.93175600	0.97695529		42.00000000	0.81761905	7.30277383	0.917849
43	0.11950503	8.94810200	1.06934320		43.00000000	0.79860465	7.14599588	0.939326
44	0.12928027	8.93655010	1.15531961		44.00000000	0.78045455	6.97457115	0.960710
45	0.13944699	8.94650170	1.24756273		45.00000000	0.76311111	6.82717485	0.982061
46	0.14925647	8.94587420	1.33522960		46.00000000	0.74652174	6.67828957	1.003444
47	0.15944925	8.94353960	1.42604068		47.00000000	0.73063830	6.53449255	1.024921
48	0.16958620	8.92936130	1.51429645		48.00000000	0.71541667	6.38821390	1.046303
49	0.17941503	8.94193270	1.60431712		49.00000000	0.70081633	6.26665243	1.067656
50	0.18951254	8.93002220	1.69235119		50.00000000	0.68680000	6.13313925	1.089033
51	0.19931978	8.95536520	1.78498142		51.00000000	0.67333333	6.02994590	1.110502
52	0.20945971	8.93215940	1.87092752		52.00000000	0.66038462	5.89866065	1.131878
53	0.21927960	8.95103260	1.96277885		53.00000000	0.64792453	5.79959358	1.153237
54	0.22943518	8.93769550	2.05062178		54.00000000	0.63592593	5.68371229	1.174596
55	0.23921859	8.93497660	2.13741250		55.00000000	0.62436364	5.57867448	1.196071
56	0.24940541	8.93992140	2.22966476		56.00000000	0.61321429	5.48208752	1.217448
57	0.25955430	8.93531040	2.31919824		57.00000000	0.60245614	5.38313262	1.238829
58	0.26938161	8.93655400	2.40734330		58.00000000	0.59206897	5.29105628	1.260181
59	0.27951187	8.94132140	2.49920546		59.00000000	0.58203390	5.20415215	1.281654
60	0.28934219	8.94031050	2.58680902		60.00000000	0.57233333	5.11683771	1.303040
61	0.29947618	8.93540570	2.67594117		61.00000000	0.56295082	5.03019396	1.324431
62	0.30930576	8.93738650	2.76438512		62.00000000	0.55387097	4.95015891	1.345906
63	0.31942856	8.95582580	2.86074654		63.00000000	0.54507937	4.88163584	1.367298
64	0.32926631	8.92788600	2.93965208		64.00000000	0.53656250	4.79036883	1.388649
65	0.33940849	8.94576550	3.03626876		65.00000000	0.52830769	4.72611673	1.410020
66	0.34924105	8.92902090	3.11838063		66.00000000	0.52030303	4.64579663	1.431498
67	0.35938320	8.93900680	3.21252887		67.00000000	0.51253731	4.58157453	1.452865
68	0.36953652	8.93308450	3.30110096		68.00000000	0.50500000	4.51120767	1.474206
69	0.37934750	8.93386170	3.38903810		69.00000000	0.49768116	4.44621465	1.495596
70	0.38952464	8.91989040	3.47451710		70.00000000	0.49057143	4.37584338	1.517086
71	0.39932817	8.94469640	3.57186924		71.00000000	0.48366197	4.32620950	1.538455
72	0.40947703	8.93681910	3.65942214		72.00000000	0.47694444	4.26236622	1.559819
73	0.41932446	8.93155190	3.74521818		73.00000000	0.47041096	4.20149989	1.581185
74	0.42945173	8.93266390	3.83614797		74.00000000	0.46405405	4.14523890	1.602662
75	0.43926048	8.92257020	3.91933247		75.00000000	0.45786667	4.08534748	1.624032
76	0.44945920	8.92341140	4.01070935		76.00000000	0.45184211	4.03197299	1.645375
77	0.45957980	8.91819950	4.09862434		77.00000000	0.44597403	3.97728534	1.666748
78	0.46943763	8.91059970	4.18297081		78.00000000	0.44025641	3.92294864	1.688232
79	0.47958428	8.91159920	4.27386289		79.00000000	0.43468354	3.87372553	1.709608
80	0.48937440	8.88560580	4.34838801		80.00000000	0.42925000	3.81414629	1.730975
81	0.49950615	8.88039020	4.43580952		81.00000000	0.42395062	3.76484691	1.752343
82	0.50930518	8.85174270	4.50823841		82.00000000	0.41878049	3.70693713	1.773820
83	0.51946598	8.79132080	4.56679207		83.00000000	0.41373494	3.63727658	1.795217
84	0.52924645	8.76852610	4.64071131		84.00000000	0.40880952	3.58465698	1.816583
85	0.53936327	8.67083360	4.67672916		85.00000000	0.40400000	3.50301677	1.837941
86	0.54951066	8.57127290	4.71000583		86.00000000	0.39930233	3.42252920	1.859415
87	0.55932462	8.41738700	4.70805179		87.00000000	0.39471264	3.32244908	1.880795
88	0.56943250	8.20542050	4.67243311		88.00000000	0.39022727	3.20197886	1.902182
89	0.57926583	7.91043710	4.58224591		89.00000000	0.38584270	3.05218438	1.923528
90	0.58939159	7.51042370	4.42658057		90.00000000	0.38155556	2.86564389	1.944996
91	0.59918994	7.00578590	4.19779643		91.00000000	0.37736264	2.64372184	1.966375
92	0.60928220	6.33480690	3.85968508		92.00000000	0.37326087	2.36453553	1.987858
93	0.61907679	5.50758360	3.40961718		93.00000000	0.36924731	2.03366044	2.009369
94	0.62920928	4.45748380	2.80469017		94.00000000	0.36531915	1.62840419	2.030758
95	0.63932395	3.15847830	2.01929082		95.00000000	0.36147368	1.14170679	2.052168
96	0.64912301	1.66127770	1.07837358		96.00000000	0.35770833	0.59425288	2.073565
97	0.65916169	-0.16243102	-0.10706831		97.00000000	0.35402062	-0.05750393	2.095056
98	0.66895705	-2.23369770	-1.49424782		98.00000000	0.35040816	-0.78270591	2.116449
99	0.67899352	-4.70338300	-3.19356658		99.00000000	0.34686869	-1.63145629	2.137800
100	0.68887967	-7.49037360	-5.15996609		100.00000000	0.34340000	-2.57219429	2.159183
101	0.69671530	-9.99475570	-6.96349922		101.00000000	0.34000000	-3.39821694	2.180666
