# Supplementary material for: Study on the Electrical Injection Regeneration of Industrialized B-Doped Czochralski Silicon PERC Solar Cells
Source: Hindawi journal article supplement (doi:10.1155/2019/5357370), 2019-06-20
Supplement: f1 [file 5357370.f1.zip › section3.2/IVRawData_1-30-5h.csv]

20:24 02/04/2018
Test Lot:	JK-PERC
Recipe:	Recipe_YJX-LID
Cell Name:	1-30-5h
Test Order:	2
Test Condition:	Light
1	-0.29985061	9.02192970	-2.70523112		1.00000000	34.34000000	309.81306590	0.000000
2	-0.29006884	9.03020760	-2.61938184		2.00000000	17.17000000	155.04866449	0.061814
3	-0.27992237	9.02072530	-2.52510281		3.00000000	11.44666667	103.25723560	0.083243
4	-0.27008328	9.02921300	-2.43863946		4.00000000	8.58500000	77.51579361	0.104652
5	-0.25990629	9.03377720	-2.34793552		5.00000000	6.86800000	62.04398181	0.126129
6	-0.24975833	9.02525420	-2.25413242		6.00000000	5.72333333	51.65453820	0.147558
7	-0.23994158	9.03460310	-2.16777694		7.00000000	4.90571429	44.32118149	0.168942
8	-0.22980998	9.02859020	-2.07486013		8.00000000	4.29250000	38.75522343	0.190427
9	-0.21996719	9.03055760	-1.98642638		9.00000000	3.81555556	34.45659422	0.211820
10	-0.20981625	9.02103230	-1.89275917		10.00000000	3.43400000	30.97822492	0.233163
11	-0.19999057	9.03434940	-1.80678469		11.00000000	3.12181818	28.20359622	0.254535
12	-0.18984260	9.02364920	-1.71307303		12.00000000	2.86166667	25.82267613	0.276048
13	-0.18009210	9.04204560	-1.62840098		13.00000000	2.64153846	23.88491122	0.297430
14	-0.16995604	9.02832510	-1.53441838		14.00000000	2.45285714	22.14519171	0.318767
15	-0.16012961	9.04200740	-1.44789312		15.00000000	2.28933333	20.70016894	0.340148
16	-0.14999653	9.02869030	-1.35427222		16.00000000	2.14625000	19.37782656	0.361624
17	-0.13982847	9.03621010	-1.26351943		17.00000000	2.02000000	18.25314440	0.383007
18	-0.13002884	9.02735040	-1.17381590		18.00000000	1.90777778	17.22217849	0.404365
19	-0.11986152	9.03437610	-1.08287405		19.00000000	1.80736842	16.32844607	0.425776
20	-0.11007752	9.02484890	-0.99343299		20.00000000	1.71700000	15.49566556	0.447258
21	-0.09990574	9.03066160	-0.90221490		21.00000000	1.63523810	14.76728187	0.468632
22	-0.09007559	9.02659420	-0.81307580		22.00000000	1.56090909	14.08969295	0.489978
23	-0.07994027	9.03194620	-0.72201625		23.00000000	1.49304348	13.48508837	0.511350
24	-0.07008334	9.03788570	-0.63340517		24.00000000	1.43083333	12.93170812	0.532839
25	-0.05995472	9.03173730	-0.54149526		25.00000000	1.37360000	12.40599436	0.554221
26	-0.04981941	9.03486160	-0.45011144		26.00000000	1.32076923	11.93296721	0.575577
27	-0.03997884	9.02817820	-0.36093608		27.00000000	1.27185185	11.48250516	0.596946
28	-0.02985841	9.04199220	-0.26997951		28.00000000	1.22642857	11.08935758	0.618426
29	-0.02002380	9.02302460	-0.18067524		29.00000000	1.18413793	10.68450568	0.639820
30	-0.00986020	9.04026030	-0.08913879		30.00000000	1.14466667	10.34808462	0.661202
31	-0.00066123	9.02646060	-0.00596860		31.00000000	1.10774194	9.99898894	0.682676
32	0.00949174	9.02768420	0.08568840		32.00000000	1.07312500	9.68783361	0.704154
33	0.01932458	9.03283880	0.17455580		33.00000000	1.04060606	9.39962680	0.725533
34	0.02944621	9.02605530	0.26578309		34.00000000	1.01000000	9.11631585	0.746919
35	0.03925970	9.03396890	0.35467089		35.00000000	0.98114286	8.86361406	0.768275
36	0.04940514	9.03314970	0.44628405		36.00000000	0.95388889	8.61662113	0.789759
37	0.05925883	9.03096680	0.53516449		37.00000000	0.92810811	8.38171351	0.811145
38	0.06938641	9.03065780	0.62660491		38.00000000	0.90368421	8.16086286	0.832524
39	0.07951846	9.03724670	0.71862794		39.00000000	0.88051282	7.95741158	0.854000
40	0.08934609	9.02737900	0.80656100		40.00000000	0.85850000	7.75000487	0.875382
41	0.09949079	9.03185460	0.89858637		41.00000000	0.83756098	7.56472895	0.896733
42	0.10932884	9.03243350	0.98750548		42.00000000	0.81761905	7.38508968	0.918109
43	0.11950778	9.03733350	1.08003166		43.00000000	0.79860465	7.21725657	0.939593
44	0.12930043	9.01985550	1.16627119		44.00000000	0.78045455	7.03958722	0.960957
45	0.13944736	9.03046800	1.25927492		45.00000000	0.76311111	6.89125047	0.982299
46	0.14926457	9.03372380	1.34841490		46.00000000	0.74652174	6.74387120	1.003684
47	0.15942343	9.02133270	1.43821180		47.00000000	0.73063830	6.59133117	1.025146
48	0.16950411	9.02470680	1.52972489		48.00000000	0.71541667	6.45642566	1.046533
49	0.17935705	9.04371170	1.62205345		49.00000000	0.70081633	6.33798081	1.067874
50	0.18952259	9.02838800	1.71108348		50.00000000	0.68680000	6.20069688	1.089243
51	0.19928399	9.03608320	1.80074671		51.00000000	0.67333333	6.08429602	1.110729
52	0.20941529	9.01446530	1.88776686		52.00000000	0.66038462	5.95301420	1.132094
53	0.21924888	9.03722290	1.98140100		53.00000000	0.64792453	5.85543838	1.153449
54	0.22938837	9.02592850	2.07044303		54.00000000	0.63592593	5.73982194	1.174859
55	0.23925544	9.03275590	2.16113599		55.00000000	0.62436364	5.63972432	1.196347
56	0.24935326	9.02689650	2.25088607		56.00000000	0.61321429	5.53542189	1.217735
57	0.25953293	9.02047440	2.34111015		57.00000000	0.60245614	5.43444019	1.239096
58	0.26932335	9.03728960	2.43395311		58.00000000	0.59206897	5.35069870	1.260473
59	0.27947104	9.02303310	2.52167644		59.00000000	0.58203390	5.25171113	1.281952
60	0.28931877	9.02415940	2.61085870		60.00000000	0.57233333	5.16482723	1.303342
61	0.29946420	9.03947930	2.70700044		61.00000000	0.56295082	5.08878228	1.324706
62	0.30925685	9.02231220	2.79021185		62.00000000	0.55387097	4.99719679	1.346071
63	0.31943804	9.02741340	2.88369924		63.00000000	0.54507937	4.92065676	1.367547
64	0.32927683	9.02123550	2.97048383		64.00000000	0.53656250	4.84045667	1.388930
65	0.33942673	9.04195590	3.06908152		65.00000000	0.52830769	4.77693486	1.410323
66	0.34925139	9.02621080	3.15241667		66.00000000	0.52030303	4.69636483	1.431676
67	0.35938045	9.03630160	3.24747014		67.00000000	0.51253731	4.63144175	1.453138
68	0.36956239	9.01771930	3.33260990		68.00000000	0.50500000	4.55394825	1.474530
69	0.37938258	9.02477360	3.42384189		69.00000000	0.49768116	4.49145979	1.495901
70	0.38953546	9.02056500	3.51382994		70.00000000	0.49057143	4.42523146	1.517381
71	0.39932290	9.02911280	3.60553151		71.00000000	0.48366197	4.36703850	1.538780
72	0.40949515	9.03144360	3.69833235		72.00000000	0.47694444	4.30749685	1.560130
73	0.41931757	9.01856230	3.78164163		73.00000000	0.47041096	4.24243054	1.581500
74	0.42943770	9.01846690	3.87286968		74.00000000	0.46405405	4.18505613	1.602984
75	0.43926832	9.02488710	3.96434699		75.00000000	0.45786667	4.13219497	1.624367
76	0.44942865	9.00675870	4.04789540		76.00000000	0.45184211	4.06963281	1.645725
77	0.45952645	9.00585460	4.13842839		77.00000000	0.44597403	4.01637723	1.667103
78	0.46942255	9.00128650	4.22540686		78.00000000	0.44025641	3.96287408	1.688590
79	0.47956726	8.99681570	4.31457825		79.00000000	0.43468354	3.91076774	1.709978
80	0.48935843	8.97866920	4.39378746		80.00000000	0.42925000	3.85409375	1.731319
81	0.49948376	8.96062280	4.47568557		81.00000000	0.42395062	3.79886157	1.752692
82	0.50930321	8.94505880	4.55574716		82.00000000	0.41878049	3.74601609	1.774174
83	0.51945835	8.92840100	4.63793245		83.00000000	0.41373494	3.69399145	1.795556
84	0.52925026	8.88034250	4.69992358		84.00000000	0.40880952	3.63036859	1.816890
85	0.53936738	8.83124920	4.76328774		85.00000000	0.40400000	3.56782468	1.838266
86	0.54953367	8.75022320	4.80854227		86.00000000	0.39930233	3.49398447	1.859752
87	0.55933380	8.65346150	4.84017350		87.00000000	0.39471264	3.41563067	1.881138
88	0.56945986	8.50116350	4.84107138		88.00000000	0.39022727	3.31738585	1.902511
89	0.57929718	8.31416030	4.81636962		89.00000000	0.38584270	3.20795803	1.923901
90	0.58942699	8.01750950	4.72573649		90.00000000	0.38155556	3.05912529	1.945391
91	0.59922707	7.66272350	4.59171135		91.00000000	0.37736264	2.89162555	1.966764
92	0.60934055	7.15754700	4.36138363		92.00000000	0.37326087	2.67163222	1.988229
93	0.61914587	6.51851270	4.03591022		93.00000000	0.36924731	2.40694329	2.009634
94	0.62925482	5.65766860	3.56011524		94.00000000	0.36531915	2.06685468	2.031124
95	0.63939428	4.56543300	2.91911175		95.00000000	0.36147368	1.65028389	2.052560
96	0.64917433	3.24147580	2.10428288		96.00000000	0.35770833	1.15950291	2.073974
97	0.65927434	1.57398440	1.03768753		97.00000000	0.35402062	0.55722293	2.095323
98	0.66904539	-0.38182247	-0.25545656		98.00000000	0.35040816	-0.13379371	2.116809
99	0.67909408	-2.74465890	-1.86388161		99.00000000	0.34686869	-0.95203623	2.138195
100	0.68881458	-5.45408730	-3.75685485		100.00000000	0.34340000	-1.87293358	2.159582
101	0.69909251	-8.66151050	-6.05519712		101.00000000	0.34000000	-2.94491357	2.181066
