# Supplementary material for: Study on the Electrical Injection Regeneration of Industrialized B-Doped Czochralski Silicon PERC Solar Cells
Source: Hindawi journal article supplement (doi:10.1155/2019/5357370), 2019-06-20
Supplement: f1 [file 5357370.f1.zip › section3.2/IVRawData_1-30-6h.csv]

21:27 02/04/2018
Test Lot:	JK-PERC
Recipe:	Recipe_YJX-LID
Cell Name:	1-30-6h
Test Order:	2
Test Condition:	Light
1	-0.29988107	9.04812620	-2.71336177		1.00000000	34.34000000	310.71265371	0.000000
2	-0.29010358	9.06009860	-2.62836704		2.00000000	17.17000000	155.56189296	0.061791
3	-0.27995467	9.04907610	-2.53333111		3.00000000	11.44666667	103.58175776	0.083207
4	-0.27013621	9.07054420	-2.45028243		4.00000000	8.58500000	77.87062196	0.104712
5	-0.25999030	9.05646710	-2.35459360		5.00000000	6.86800000	62.19981604	0.126077
6	-0.24981831	9.06059650	-2.26350291		6.00000000	5.72333333	51.85681397	0.147426
7	-0.24001029	9.05450820	-2.17317514		7.00000000	4.90571429	44.41883023	0.168820
8	-0.22986659	9.06498720	-2.08373770		8.00000000	4.29250000	38.91145756	0.190307
9	-0.22004516	9.04575820	-1.99047531		9.00000000	3.81555556	34.51459295	0.211749
10	-0.20990594	9.06882570	-1.90360038		10.00000000	3.43400000	31.14234745	0.233109
11	-0.20006442	9.05357550	-1.81129833		11.00000000	3.12181818	28.26361661	0.254492
12	-0.18991105	9.06262590	-1.72109280		12.00000000	2.86166667	25.93421445	0.275980
13	-0.18011791	9.05477520	-1.63092718		13.00000000	2.64153846	23.91853695	0.297360
14	-0.16997793	9.05960180	-1.53993236		14.00000000	2.45285714	22.22190899	0.318699
15	-0.16013791	9.06166930	-1.45111678		15.00000000	2.28933333	20.74518158	0.340074
16	-0.14999197	9.05934430	-1.35882890		16.00000000	2.14625000	19.44361770	0.361564
17	-0.13985051	9.05233860	-1.26597417		17.00000000	2.02000000	18.28572397	0.382937
18	-0.13004547	9.04783250	-1.17662963		18.00000000	1.90777778	17.26125378	0.404313
19	-0.11988986	9.05710980	-1.08585563		19.00000000	1.80736842	16.36953424	0.425673
20	-0.11006398	9.05251410	-0.99635573		20.00000000	1.71700000	15.54316671	0.447139
21	-0.09991060	9.06017880	-0.90520792		21.00000000	1.63523810	14.81554952	0.468513
22	-0.09008844	9.04837990	-0.81515438		22.00000000	1.56090909	14.12369844	0.489890
23	-0.07993953	9.06623170	-0.72475029		23.00000000	1.49304348	13.53627811	0.511251
24	-0.07012630	9.06336780	-0.63558040		24.00000000	1.43083333	12.96816876	0.532721
25	-0.05998856	9.06362150	-0.54371356		25.00000000	1.37360000	12.44979049	0.554100
26	-0.04982849	9.05905060	-0.45139877		26.00000000	1.32076923	11.96491529	0.575492
27	-0.04001971	9.06740190	-0.36287482		27.00000000	1.27185185	11.53239190	0.596973
28	-0.02987304	9.05559640	-0.27051820		28.00000000	1.22642857	11.10604216	0.618347
29	-0.02002706	9.06279280	-0.18150106		29.00000000	1.18413793	10.73159672	0.639704
30	-0.00991016	9.05164240	-0.08970319		30.00000000	1.14466667	10.36111333	0.661081
31	-0.00069904	9.06686120	-0.00633806		31.00000000	1.10774194	10.04374237	0.682679
32	0.00946380	9.05673600	0.08571116		32.00000000	1.07312500	9.71900982	0.704064
33	0.01928197	9.06242180	0.17474135		33.00000000	1.04060606	9.43041105	0.725414
34	0.02940454	9.06564620	0.26657112		34.00000000	1.01000000	9.15630266	0.746794
35	0.03923982	9.05736350	0.35540931		35.00000000	0.98114286	8.88656750	0.768274
36	0.04939588	9.05424120	0.44724219		36.00000000	0.95388889	8.63674008	0.789638
37	0.05922968	9.06313800	0.53680673		37.00000000	0.92810811	8.41157186	0.811005
38	0.06935522	9.05357550	0.62791272		38.00000000	0.90368421	8.18157323	0.832382
39	0.07951574	9.06311130	0.72066000		39.00000000	0.88051282	7.98018569	0.853852
40	0.08931679	9.05188660	0.80848548		40.00000000	0.85850000	7.77104465	0.875243
41	0.09948625	9.06841850	0.90218292		41.00000000	0.83756098	7.59535345	0.896595
42	0.10929772	9.05638030	0.98984172		42.00000000	0.81761905	7.40466904	0.917961
43	0.11945005	9.05831150	1.08201576		43.00000000	0.79860465	7.23400970	0.939455
44	0.12927268	9.05413630	1.17045246		44.00000000	0.78045455	7.06634183	0.960840
45	0.13943246	9.05869870	1.26307664		45.00000000	0.76311111	6.91279363	0.982176
46	0.14922160	9.05670450	1.35145594		46.00000000	0.74652174	6.76102679	1.003556
47	0.15939330	9.06387710	1.44472128		47.00000000	0.73063830	6.62241574	1.025034
48	0.16954711	9.05125050	1.53461336		48.00000000	0.71541667	6.47541546	1.046425
49	0.17935188	9.06447120	1.62572995		49.00000000	0.70081633	6.35252941	1.067780
50	0.18947966	9.05113030	1.71500509		50.00000000	0.68680000	6.21631629	1.089123
51	0.19927698	9.06358340	1.80616353		51.00000000	0.67333333	6.10281282	1.110591
52	0.20942263	9.05368520	1.89604657		52.00000000	0.66038462	5.97891442	1.131971
53	0.21927132	9.05959800	1.98651001		53.00000000	0.64792453	5.86993576	1.153351
54	0.22941174	9.06482030	2.07957620		54.00000000	0.63592593	5.76455424	1.174721
55	0.23923884	9.04858680	2.16477341		55.00000000	0.62436364	5.64960856	1.196196
56	0.24938597	9.06311130	2.26021280		56.00000000	0.61321429	5.55762932	1.217573
57	0.25951150	9.05574800	2.35007075		57.00000000	0.60245614	5.45569099	1.239009
58	0.26934308	9.05770210	2.43962938		58.00000000	0.59206897	5.36278431	1.260515
59	0.27949393	9.05757900	2.53153835		59.00000000	0.58203390	5.27181801	1.281876
60	0.28931135	9.05554490	2.61987192		60.00000000	0.57233333	5.18279020	1.303246
61	0.29945028	9.05760860	2.71230343		61.00000000	0.56295082	5.09898819	1.324632
62	0.30927813	9.04917430	2.79871171		62.00000000	0.55387097	5.01207493	1.346107
63	0.31941333	9.06181140	2.89446336		63.00000000	0.54507937	4.93940640	1.367498
64	0.32920247	9.05346200	2.98042205		64.00000000	0.53656250	4.85774820	1.388831
65	0.33938310	9.05151270	3.07193044		65.00000000	0.52830769	4.78198379	1.410205
66	0.34919012	9.05456350	3.16176412		66.00000000	0.52030303	4.71111683	1.431691
67	0.35934690	9.06503390	3.25749183		67.00000000	0.51253731	4.64616812	1.453068
68	0.36949477	9.04521080	3.34215808		68.00000000	0.50500000	4.56783145	1.474434
69	0.37928540	9.06283760	3.43740198		69.00000000	0.49768116	4.51040352	1.495797
70	0.38946453	9.04287910	3.52188066		70.00000000	0.49057143	4.43617812	1.517268
71	0.39930874	9.04382710	3.61127920		71.00000000	0.48366197	4.37415525	1.538647
72	0.40943503	9.04667090	3.70402397		72.00000000	0.47694444	4.31475943	1.560001
73	0.41926438	9.05972480	3.79841990		73.00000000	0.47041096	4.26179383	1.581375
74	0.42941225	9.03717330	3.88067292		74.00000000	0.46405405	4.19373691	1.602852
75	0.43923861	9.04400730	3.97247720		75.00000000	0.45786667	4.14094948	1.624222
76	0.44937381	9.03788950	4.06139084		76.00000000	0.45184211	4.08369902	1.645564
77	0.45952094	9.04741860	4.15747830		77.00000000	0.44597403	4.03491370	1.666937
78	0.46938822	9.02555470	4.23648906		78.00000000	0.44025641	3.97355831	1.688415
79	0.47950411	9.02915100	4.32951501		79.00000000	0.43468354	3.92482336	1.709802
80	0.48934981	9.00780680	4.40796855		80.00000000	0.42925000	3.86660107	1.731166
81	0.49946493	8.99667360	4.49352295		81.00000000	0.42395062	3.81414533	1.752526
82	0.50929499	8.97481250	4.57082704		82.00000000	0.41878049	3.75847636	1.773989
83	0.51944661	8.95649720	4.65242211		83.00000000	0.41373494	3.70561583	1.795395
84	0.52923948	8.92533210	4.72363812		84.00000000	0.40880952	3.64876077	1.816787
85	0.53937465	8.85303690	4.77510368		85.00000000	0.40400000	3.57662691	1.838156
86	0.54951435	8.80299760	4.83737350		86.00000000	0.39930233	3.51505741	1.859642
87	0.55930573	8.68308070	4.85649679		87.00000000	0.39471264	3.42732174	1.881014
88	0.56946623	8.54906180	4.86840199		88.00000000	0.39022727	3.33607707	1.902406
89	0.57923454	8.33663270	4.82886561		89.00000000	0.38584270	3.21662884	1.923884
90	0.58940178	8.07944300	4.76203809		90.00000000	0.38155556	3.08275636	1.945254
91	0.59921324	7.70834300	4.61894118		91.00000000	0.37736264	2.90884064	1.966628
92	0.60930383	7.19836330	4.38599033		92.00000000	0.37326087	2.68686734	1.988100
93	0.61910707	6.57917070	4.07321110		93.00000000	0.36924731	2.42934110	2.009601
94	0.62922370	5.72479300	3.60217543		94.00000000	0.36531915	2.09137651	2.030975
95	0.63932991	4.61499880	2.95050677		95.00000000	0.36147368	1.66820062	2.052337
96	0.64911234	3.30854490	2.14761732		96.00000000	0.35770833	1.18349408	2.073714
97	0.65923715	1.63439310	1.07745265		97.00000000	0.35402062	0.57860886	2.095208
98	0.66897047	-0.31437147	-0.21030523		98.00000000	0.35040816	-0.11015833	2.116585
99	0.67906624	-2.69527200	-1.83026822		99.00000000	0.34686869	-0.93490546	2.137950
100	0.68876386	-5.38493110	-3.70894593		100.00000000	0.34340000	-1.84918534	2.159327
101	0.69906127	-8.63796420	-6.03846622		101.00000000	0.34000000	-2.93690783	2.180812
21:27 02/04/2018
Test Lot:	JK-PERC
Recipe:	Recipe_YJX-LID
Cell Name:	1-30-6h
Test Order:	3
Test Condition:	Light
1	-0.29990119	9.05644040	-2.71603725		1.00000000	34.34000000	310.99816334	0.000000
2	-0.29004997	9.06645870	-2.62972607		2.00000000	17.17000000	155.67109588	0.021587
3	-0.27990183	9.05691430	-2.53504689		3.00000000	11.44666667	103.67147902	0.042975
4	-0.27011016	9.05480190	-2.44579399		4.00000000	8.58500000	77.73547431	0.064351
5	-0.25999400	9.05729200	-2.35484158		5.00000000	6.86800000	62.20548146	0.085726
6	-0.24981906	9.05151080	-2.26123992		6.00000000	5.72333333	51.80481348	0.107208
7	-0.23998944	9.06065270	-2.17446097		7.00000000	4.90571429	44.44897339	0.128590
8	-0.22984353	9.05508420	-2.08125252		8.00000000	4.29250000	38.86894893	0.149936
9	-0.22003922	9.06379700	-1.99439082		9.00000000	3.81555556	34.58342100	0.171316
10	-0.20989478	9.05961990	-1.90156693		10.00000000	3.43400000	31.11073474	0.192804
11	-0.20006740	9.05087470	-1.81078497		11.00000000	3.12181818	28.25518520	0.214186
12	-0.18993115	9.05813600	-1.72042219		12.00000000	2.86166667	25.92136585	0.235581
13	-0.18014248	9.07576940	-1.63493161		13.00000000	2.64153846	23.97399394	0.256976
14	-0.16999803	9.04992390	-1.53846923		14.00000000	2.45285714	22.19817048	0.278456
15	-0.16019596	9.06439300	-1.45207914		15.00000000	2.28933333	20.75141704	0.299818
16	-0.15004408	9.05423260	-1.35853400		16.00000000	2.14625000	19.43264672	0.321185
17	-0.13987508	9.06021600	-1.26729844		17.00000000	2.02000000	18.30163632	0.342555
18	-0.13005663	9.06767750	-1.17931158		18.00000000	1.90777778	17.29911363	0.364094
19	-0.11990549	9.05414100	-1.08564121		19.00000000	1.80736842	16.36416852	0.385462
20	-0.11006398	9.06594850	-0.99783437		20.00000000	1.71700000	15.56623357	0.406799
21	-0.09992326	9.05032920	-0.90433841		21.00000000	1.63523810	14.79944308	0.428188
22	-0.09010630	9.04961680	-0.81542750		22.00000000	1.56090909	14.12562913	0.449670
23	-0.07997600	9.06166080	-0.72471538		23.00000000	1.49304348	13.52945356	0.471062
24	-0.07015755	9.05666920	-0.63539372		24.00000000	1.43083333	12.95858418	0.492453
25	-0.05994613	9.05750560	-0.54296242		25.00000000	1.37360000	12.44138969	0.513788
26	-0.04984114	9.06101320	-0.45161122		26.00000000	1.32076923	11.96750743	0.535263
27	-0.04001227	9.04930500	-0.36208323		27.00000000	1.27185185	11.50937532	0.556650
28	-0.02981863	9.06684110	-0.27036074		28.00000000	1.22642857	11.11983298	0.578042
29	-0.01998732	9.05454540	-0.18097613		29.00000000	1.18413793	10.72183066	0.639730
30	-0.00985086	9.04836750	-0.08913423		30.00000000	1.14466667	10.35736467	0.661138
31	-0.00061946	9.07375050	-0.00562080		31.00000000	1.10774194	10.05137394	0.682691
32	0.00953317	9.05926800	0.08636354		32.00000000	1.07312500	9.72172697	0.704160
33	0.01933368	9.06562330	0.17527183		33.00000000	1.04060606	9.43374255	0.725546
34	0.02949143	9.05626300	0.26708216		34.00000000	1.01000000	9.14682563	0.746916
35	0.03931129	9.05772970	0.35607104		35.00000000	0.98114286	8.88692680	0.768272
36	0.04945788	9.05219080	0.44770218		36.00000000	0.95388889	8.63478422	0.789750
37	0.05929709	9.05261800	0.53679392		37.00000000	0.92810811	8.40180817	0.811134
38	0.06942582	9.05779650	0.62884496		38.00000000	0.90368421	8.18538768	0.832493
39	0.07954338	9.05491730	0.72025875		39.00000000	0.88051282	7.97297077	0.853866
40	0.08936027	9.04611110	0.80836290		40.00000000	0.85850000	7.76608638	0.875341
41	0.09950090	9.06379600	0.90185588		41.00000000	0.83756098	7.59148182	0.896710
42	0.10932449	9.04694840	0.98905302		42.00000000	0.81761905	7.39695733	0.918094
43	0.11950010	9.05616570	1.08221271		43.00000000	0.79860465	7.23229605	0.939442
44	0.12930359	9.05908490	1.17137220		44.00000000	0.78045455	7.07020399	0.960919
45	0.13946879	9.05369090	1.26270731		45.00000000	0.76311111	6.90897212	0.982315
46	0.14925367	9.05823040	1.35197413		46.00000000	0.74652174	6.76216591	1.003699
47	0.15943523	9.04601760	1.44225390		47.00000000	0.73063830	6.60936690	1.025171
48	0.16960788	9.06782910	1.53797527		48.00000000	0.71541667	6.48727607	1.046534
49	0.17937563	9.05446530	1.62415042		49.00000000	0.70081633	6.34551711	1.067889
50	0.18953338	9.05582520	1.71638116		50.00000000	0.68680000	6.21954075	1.089267
51	0.19932124	9.04954050	1.80376563		51.00000000	0.67333333	6.09335727	1.110748
52	0.20945965	9.05513760	1.89668595		52.00000000	0.66038462	5.97987356	1.132119
53	0.21932194	9.05880740	1.98679521		53.00000000	0.64792453	5.86942351	1.153476
54	0.22944397	9.05817320	2.07834322		54.00000000	0.63592593	5.76032718	1.174857
55	0.23926754	9.05512140	2.16659662		55.00000000	0.62436364	5.65368853	1.196334
56	0.24942455	9.05713560	2.25907197		56.00000000	0.61321429	5.55396494	1.217721
57	0.25958455	9.05509760	2.35056344		57.00000000	0.60245614	5.45529915	1.239074
58	0.26939175	9.04377650	2.43631878		58.00000000	0.59206897	5.35453940	1.260457
59	0.27954355	9.05876260	2.53231866		59.00000000	0.58203390	5.27250691	1.281943
60	0.28937158	9.05827710	2.62120796		60.00000000	0.57233333	5.18435393	1.303327
61	0.29951745	9.05221560	2.71129653		61.00000000	0.56295082	5.09595219	1.324702
62	0.30933282	9.05696490	2.80161649		62.00000000	0.55387097	5.01638991	1.346080
63	0.31945932	9.06138900	2.89474517		63.00000000	0.54507937	4.93917616	1.367560
64	0.32930374	9.04763980	2.97942162		64.00000000	0.53656250	4.85462423	1.388942
65	0.33946747	9.05301480	3.07320403		65.00000000	0.52830769	4.78277736	1.410296
66	0.34926498	9.04964540	3.16072422		66.00000000	0.52030303	4.70855792	1.431659
67	0.35944358	9.06180290	3.25720688		67.00000000	0.51253731	4.64451211	1.453137
68	0.36956486	9.04604910	3.34310187		68.00000000	0.50500000	4.56825480	1.474511
69	0.37940854	9.04024510	3.42994619		69.00000000	0.49768116	4.49915966	1.495864
70	0.38958117	9.06264590	3.53063619		70.00000000	0.49057143	4.44587515	1.517228
71	0.39936903	9.04240610	3.61125695		71.00000000	0.48366197	4.37346796	1.538705
72	0.40948066	9.04464240	3.70360614		72.00000000	0.47694444	4.31379194	1.560086
73	0.41929531	9.05097770	3.79503250		73.00000000	0.47041096	4.25767910	1.581473
74	0.42943817	9.04097460	3.88253959		74.00000000	0.46405405	4.19550092	1.602818
75	0.43931162	9.03984260	3.97130790		75.00000000	0.45786667	4.13904260	1.624285
76	0.44941428	9.04081730	4.06307240		76.00000000	0.45184211	4.08502192	1.645669
77	0.45960256	9.04346560	4.15639994		77.00000000	0.44597403	4.03315076	1.667057
78	0.46943507	9.02396200	4.23616423		78.00000000	0.44025641	3.97285712	1.688539
79	0.47959283	9.03024670	4.33084157		79.00000000	0.43468354	3.92529964	1.709912
80	0.48940375	9.01295570	4.41097432		80.00000000	0.42925000	3.86881123	1.731260
81	0.49954364	9.01256850	4.50217127		81.00000000	0.42395062	3.82088398	1.752691
82	0.50936872	8.97647000	4.57233303		82.00000000	0.41878049	3.75917049	1.774187
83	0.51951683	8.96132180	4.65555749		83.00000000	0.41373494	3.70761194	1.795560
84	0.52928752	8.91556170	4.71889554		84.00000000	0.40880952	3.64476653	1.816927
85	0.53941852	8.88040920	4.79025719		85.00000000	0.40400000	3.58768532	1.838300
86	0.54957551	8.79217050	4.83196159		86.00000000	0.39930233	3.51073413	1.859778
87	0.55938274	8.69974140	4.86648518		87.00000000	0.39471264	3.43389793	1.881164
88	0.56950849	8.54950810	4.86901745		88.00000000	0.39022727	3.33625123	1.902510
89	0.57933354	8.36869530	4.84826587		89.00000000	0.38584270	3.22899996	1.923917
90	0.58946896	8.09181500	4.76987377		90.00000000	0.38155556	3.08747697	1.945398
91	0.59925681	7.73834420	4.63725546		91.00000000	0.37736264	2.92016198	1.966775
92	0.60936993	7.25148580	4.41883739		92.00000000	0.37326087	2.70669590	1.988251
93	0.61916667	6.61403800	4.09519188		93.00000000	0.36924731	2.44221575	2.009648
94	0.62926865	5.76603130	3.62838273		94.00000000	0.36531915	2.10644165	2.031140
95	0.63942641	4.66971350	2.98593814		95.00000000	0.36147368	1.68797854	2.052522
96	0.64918745	3.34040740	2.16855056		96.00000000	0.35770833	1.19489156	2.073881
97	0.65929461	1.64276870	1.08306855		97.00000000	0.35402062	0.58157399	2.095259
98	0.66901845	-0.34459487	-0.23054033		98.00000000	0.35040816	-0.12074886	2.116728
99	0.67913526	-2.78330210	-1.89023860		99.00000000	0.34686869	-0.96544034	2.138097
100	0.68882340	-5.58358910	-3.84610683		100.00000000	0.34340000	-1.91740450	2.159455
101	0.69911212	-8.96397970	-6.26682685		101.00000000	0.34000000	-3.04775310	2.180821
21:27 02/04/2018
Test Lot:	JK-PERC
Recipe:	Recipe_YJX-LID
Cell Name:	1-30-6h
Test Order:	4
Test Condition:	Light
1	-0.29988807	9.06091690	-2.71726088		1.00000000	34.34000000	311.15188635	0.000000
2	-0.29008451	9.04079150	-2.62259357		2.00000000	17.17000000	155.23039006	0.061809
3	-0.27991253	9.06017110	-2.53605541		3.00000000	11.44666667	103.70875852	0.083237
4	-0.27009854	9.05608370	-2.44603499		4.00000000	8.58500000	77.74647856	0.104743
5	-0.25992060	9.06049160	-2.35500841		5.00000000	6.86800000	62.22745631	0.126126
6	-0.24977390	9.04996590	-2.26044528		6.00000000	5.72333333	51.79597150	0.147470
7	-0.23997778	9.06104370	-2.17444915		7.00000000	4.90571429	44.45089152	0.168851
8	-0.22982961	9.04710200	-2.07929192		8.00000000	4.29250000	38.83468534	0.190330
9	-0.21997990	9.04468730	-1.98964941		9.00000000	3.81555556	34.51050688	0.211703
10	-0.20982800	9.06345650	-1.90176695		10.00000000	3.43400000	31.12390962	0.233089
11	-0.19999318	9.04623220	-1.80918474		11.00000000	3.12181818	28.24069216	0.254451
12	-0.18987775	9.05694290	-1.71971194		12.00000000	2.86166667	25.91795160	0.275936
13	-0.18010023	9.07408430	-1.63424467		13.00000000	2.64153846	23.96954268	0.297314
14	-0.16995057	9.04729840	-1.53759352		14.00000000	2.45285714	22.19173050	0.318692
15	-0.16011722	9.05800630	-1.45034279		15.00000000	2.28933333	20.73679576	0.340040
16	-0.14998990	9.05501750	-1.35816117		16.00000000	2.14625000	19.43433131	0.361527
17	-0.13981047	9.06303310	-1.26710692		17.00000000	2.02000000	18.30732686	0.382904
18	-0.13001880	9.06064990	-1.17805483		18.00000000	1.90777778	17.28570653	0.404286
19	-0.11986244	9.06267930	-1.08627485		19.00000000	1.80736842	16.37960038	0.425769
20	-0.11004325	9.05740740	-0.99670655		20.00000000	1.71700000	15.55156851	0.447144
21	-0.09992039	9.05957320	-0.90523604		21.00000000	1.63523810	14.81455922	0.468504
22	-0.09007067	9.06124400	-0.81615227		22.00000000	1.56090909	14.14377813	0.489874
23	-0.07994259	9.05267240	-0.72369409		23.00000000	1.49304348	13.51603349	0.511337
24	-0.07011595	9.05488010	-0.63489148		24.00000000	1.43083333	12.95602428	0.532721
25	-0.05995215	9.06523610	-0.54348037		25.00000000	1.37360000	12.45200831	0.554056
26	-0.04980100	9.05906300	-0.45115039		26.00000000	1.32076923	11.96493167	0.575434
27	-0.04001827	9.05159760	-0.36222926		27.00000000	1.27185185	11.51229117	0.596916
28	-0.02984033	9.06153110	-0.27039904		28.00000000	1.22642857	11.11332064	0.618308
29	-0.02003527	9.06031130	-0.18152576		29.00000000	1.18413793	10.72865828	0.639670
30	-0.00988635	9.05042930	-0.08947572		30.00000000	1.14466667	10.35972474	0.661046
31	-0.00064024	9.06224160	-0.00580202		31.00000000	1.10774194	10.03862505	0.682633
32	0.00949135	9.05299280	0.08592510		32.00000000	1.07312500	9.71499290	0.704022
33	0.01932962	9.05264280	0.17498414		33.00000000	1.04060606	9.42023496	0.725365
34	0.02944103	9.05943010	0.26671898		34.00000000	1.01000000	9.15002440	0.746740
35	0.03928154	9.05269910	0.35560393		35.00000000	0.98114286	8.88199106	0.768229
36	0.04943314	9.05365560	0.44755061		36.00000000	0.95388889	8.63618148	0.789615
37	0.05926769	9.05886270	0.53689786		37.00000000	0.92810811	8.40760392	0.810971
38	0.06942376	9.04888730	0.62820775		38.00000000	0.90368421	8.17733658	0.832352
39	0.07955229	9.06520940	0.72115812		39.00000000	0.88051282	7.98203310	0.853832
40	0.08936823	9.05424310	0.80916170		40.00000000	0.85850000	7.77306770	0.875233
41	0.09951685	9.06176760	0.90179860		41.00000000	0.83756098	7.58978291	0.896600
42	0.10933875	9.05995080	0.99060370		42.00000000	0.81761905	7.40758834	0.917948
43	0.11948291	9.04776290	1.08105304		43.00000000	0.79860465	7.22558553	0.939413
44	0.12933011	9.06435970	1.17229464		44.00000000	0.78045455	7.07432073	0.960795
45	0.13945270	9.03602030	1.26009743		45.00000000	0.76311111	6.89548749	0.982175
46	0.14928798	9.05315970	1.35152792		46.00000000	0.74652174	6.75838052	1.003538
47	0.15943810	9.06117340	1.44469627		47.00000000	0.73063830	6.62044031	1.025015
48	0.16958524	9.05906960	1.53628449		48.00000000	0.71541667	6.48100938	1.046385
49	0.17938705	9.05458640	1.62427554		49.00000000	0.70081633	6.34560198	1.067774
50	0.18954833	9.05142120	1.71568177		50.00000000	0.68680000	6.21651608	1.089253
51	0.19932482	9.05680470	1.80524597		51.00000000	0.67333333	6.09824850	1.110642
52	0.20945112	9.04333020	1.89413564		52.00000000	0.66038462	5.97207614	1.132008
53	0.21929981	9.05726050	1.98625551		53.00000000	0.64792453	5.86842124	1.153380
54	0.22941941	9.05124090	2.07653035		54.00000000	0.63592593	5.75591875	1.174852
55	0.23925693	9.04645250	2.16442645		55.00000000	0.62436364	5.64827598	1.196226
56	0.24940258	9.05997370	2.25958082		56.00000000	0.61321429	5.55570530	1.217562
57	0.25952441	9.04927440	2.34850760		57.00000000	0.60245614	5.45179093	1.238941
58	0.26937014	9.05079170	2.43801303		58.00000000	0.59206897	5.35869288	1.260424
59	0.27948600	9.06775760	2.53431130		59.00000000	0.58203390	5.27774230	1.281811
60	0.28935555	9.05910590	2.62130257		60.00000000	0.57233333	5.18482828	1.303176
61	0.29947141	9.04659750	2.70919731		61.00000000	0.56295082	5.09278948	1.324553
62	0.30932680	9.06223010	2.80319064		62.00000000	0.55387097	5.01930616	1.346023
63	0.31946278	9.04785440	2.89045272		63.00000000	0.54507937	4.93179873	1.367414
64	0.32927725	9.05476670	2.98152868		64.00000000	0.53656250	4.85844826	1.388757
65	0.33942512	9.05838490	3.07464338		65.00000000	0.52830769	4.78561442	1.410123
66	0.34924403	9.02778430	3.15289977		66.00000000	0.52030303	4.69718353	1.431609
67	0.35939118	9.09195420	3.26756815		67.00000000	0.51253731	4.65996578	1.452985
68	0.36956286	9.03915980	3.34053775		68.00000000	0.50500000	4.56477570	1.474350
69	0.37935796	9.04925440	3.43290669		69.00000000	0.49768116	4.50364342	1.495730
70	0.38951924	9.05397220	3.52669637		70.00000000	0.49057143	4.44162008	1.517211
71	0.39935455	9.04688640	3.61291525		71.00000000	0.48366197	4.37563492	1.538606
72	0.40950465	9.04628090	3.70449409		72.00000000	0.47694444	4.31457342	1.559969
73	0.41931167	9.05596540	3.79727198		73.00000000	0.47041096	4.26002537	1.581331
74	0.42948413	9.03252410	3.87932575		74.00000000	0.46405405	4.19157943	1.602805
75	0.43927774	9.04616740	3.97377997		75.00000000	0.45786667	4.14193851	1.624188
76	0.44941372	9.04643250	4.06559088		76.00000000	0.45184211	4.08755911	1.645564
77	0.45957574	9.03198340	4.15088045		77.00000000	0.44597403	4.02803000	1.666917
78	0.46944228	9.03399470	4.24093907		78.00000000	0.44025641	3.97727408	1.688391
79	0.47958273	9.03977870	4.33532175		79.00000000	0.43468354	3.92944305	1.709757
80	0.48937932	8.99953080	4.40418426		80.00000000	0.42925000	3.86304860	1.731144
81	0.49952200	9.01203730	4.50171090		81.00000000	0.42395062	3.82065878	1.752629
82	0.50937736	8.97806550	4.57322330		82.00000000	0.41878049	3.75983865	1.774005
83	0.51949477	8.95713810	4.65318640		83.00000000	0.41373494	3.70588099	1.795356
84	0.52924371	8.91112900	4.71615897		84.00000000	0.40880952	3.64295440	1.816733
85	0.53942209	8.86765770	4.78341045		85.00000000	0.40400000	3.58253371	1.838219
86	0.54951489	8.79382510	4.83233783		86.00000000	0.39930233	3.51139481	1.859631
87	0.55935615	8.70328710	4.86823716		87.00000000	0.39471264	3.43529746	1.880974
88	0.56947726	8.55563160	4.87223764		88.00000000	0.39022727	3.33864079	1.902356
89	0.57927680	8.37106610	4.84916438		89.00000000	0.38584270	3.22991472	1.923843
90	0.58941501	8.09032150	4.76855693		90.00000000	0.38155556	3.08690711	1.945215
91	0.59924662	7.73397970	4.63456119		91.00000000	0.37736264	2.91851498	1.966576
92	0.60931933	7.25426960	4.42016669		92.00000000	0.37326087	2.70773498	1.988055
93	0.61917990	6.61466220	4.09566588		93.00000000	0.36924731	2.44244624	2.009553
94	0.62926304	5.76488490	3.62762900		94.00000000	0.36531915	2.10602285	2.030998
95	0.63937593	4.66888900	2.98517525		95.00000000	0.36147368	1.68768051	2.052357
96	0.64917177	3.34609720	2.17219184		96.00000000	0.35770833	1.19692685	2.073741
97	0.65926456	1.64127930	1.08203728		97.00000000	0.35402062	0.58104671	2.095225
98	0.66896367	-0.33747175	-0.22575634		98.00000000	0.35040816	-0.11825286	2.116613
99	0.67910933	-2.79714040	-1.89956414		99.00000000	0.34686869	-0.97024042	2.137972
100	0.68879133	-5.59913780	-3.85663757		100.00000000	0.34340000	-1.92274392	2.159346
101	0.69911784	-9.01307770	-6.30120341		101.00000000	0.34000000	-3.06444642	2.180831
