# Supplementary material for: Study on the Electrical Injection Regeneration of Industrialized B-Doped Czochralski Silicon PERC Solar Cells
Source: Hindawi journal article supplement (doi:10.1155/2019/5357370), 2019-06-20
Supplement: f1 [file 5357370.f1.zip › section3.2/IVRawData_1-30-7h.csv]

22:32 02/04/2018
Test Lot:	JK-PERC
Recipe:	Recipe_YJX-LID
Cell Name:	1-30-7h
Test Order:	2
Test Condition:	Light
1	-0.29989246	9.07185750	-2.72058166		1.00000000	34.34000000	311.52758655	0.000000
2	-0.29005748	9.07426550	-2.63205858		2.00000000	17.17000000	155.80513864	0.061720
3	-0.27992028	9.06062600	-2.53625297		3.00000000	11.44666667	103.71396561	0.083237
4	-0.27008009	9.06928250	-2.44943263		4.00000000	8.58500000	77.85979026	0.104619
5	-0.25997415	9.05491830	-2.35404469		5.00000000	6.86800000	62.18917888	0.125981
6	-0.24979232	9.06971650	-2.26554553		6.00000000	5.72333333	51.90901077	0.147345
7	-0.23995286	9.07410050	-2.17735637		7.00000000	4.90571429	44.51494445	0.168858
8	-0.22981122	9.06744190	-2.08379989		8.00000000	4.29250000	38.92199436	0.190233
9	-0.22001493	9.07409190	-1.99643569		9.00000000	3.81555556	34.62270176	0.211571
10	-0.20983979	9.05595300	-1.90029928		10.00000000	3.43400000	31.09814260	0.232946
11	-0.20000926	9.06097130	-1.81227816		11.00000000	3.12181818	28.28670495	0.254428
12	-0.18993758	9.07593630	-1.72386138		12.00000000	2.86166667	25.97230438	0.275809
13	-0.18009588	9.06316760	-1.63223914		13.00000000	2.64153846	23.94070580	0.297165
14	-0.16995275	9.07096770	-1.54163591		14.00000000	2.45285714	22.24978792	0.318537
15	-0.16013338	9.06974600	-1.45236908		15.00000000	2.28933333	20.76367184	0.340011
16	-0.15000960	9.05862520	-1.35888074		16.00000000	2.14625000	19.44207434	0.361397
17	-0.13983670	9.08787540	-1.27081851		17.00000000	2.02000000	18.35750831	0.382791
18	-0.13001658	9.06368830	-1.17842975		18.00000000	1.90777778	17.29150312	0.404163
19	-0.11984740	9.06615640	-1.08655527		19.00000000	1.80736842	16.38588478	0.425655
20	-0.11004664	9.07230470	-0.99837665		20.00000000	1.71700000	15.57714717	0.447031
21	-0.09991095	9.06168940	-0.90536201		21.00000000	1.63523810	14.81801971	0.468421
22	-0.09008861	9.07072450	-0.81716893		22.00000000	1.56090909	14.15857633	0.489778
23	-0.07997078	9.05133910	-0.72384262		23.00000000	1.49304348	13.51404281	0.511265
24	-0.07009559	9.06836130	-0.63565214		24.00000000	1.43083333	12.97531363	0.532648
25	-0.05997032	9.06857300	-0.54384522		25.00000000	1.37360000	12.45659187	0.554033
26	-0.04985919	9.06174560	-0.45181131		26.00000000	1.32076923	11.96847477	0.575506
27	-0.04007704	9.07124810	-0.36354875		27.00000000	1.27185185	11.53728369	0.596941
28	-0.02990562	9.06633850	-0.27113450		28.00000000	1.22642857	11.11921657	0.618315
29	-0.02008477	9.06681250	-0.18210482		29.00000000	1.18413793	10.73635659	0.639699
30	-0.00990665	9.06883340	-0.08984178		30.00000000	1.14466667	10.38079130	0.661056
31	-0.00070355	9.05965810	-0.00637396		31.00000000	1.10774194	10.03576320	0.682665
32	0.00945798	9.07072450	0.08579073		32.00000000	1.07312500	9.73402123	0.704038
33	0.01928004	9.05973150	0.17467202		33.00000000	1.04060606	9.42761151	0.725420
34	0.02946978	9.07152840	0.26733590		34.00000000	1.01000000	9.16224368	0.746778
35	0.03926951	9.06533240	0.35599120		35.00000000	0.98114286	8.89438613	0.768243
36	0.04942054	9.07088090	0.44828786		36.00000000	0.95388889	8.65261250	0.789611
37	0.05924038	9.06825260	0.53720668		37.00000000	0.92810811	8.41631876	0.810995
38	0.06937876	9.04737190	0.62769541		38.00000000	0.90368421	8.17596713	0.832356
39	0.07953946	9.06349280	0.72090528		39.00000000	0.88051282	7.98052161	0.853833
40	0.08929901	9.07453730	0.81034718		40.00000000	0.85850000	7.79049027	0.875209
41	0.09949097	9.05350020	0.90074152		41.00000000	0.83756098	7.58285846	0.896592
42	0.10930038	9.06439400	0.99074171		42.00000000	0.81761905	7.41122119	0.918083
43	0.11947523	9.06475640	1.08301386		43.00000000	0.79860465	7.23915662	0.939459
44	0.12927869	9.06271360	1.17161574		44.00000000	0.78045455	7.07303602	0.960828
45	0.13946916	9.07442760	1.26560279		45.00000000	0.76311111	6.92479653	0.982204
46	0.14928007	9.05402090	1.35158487		46.00000000	0.74652174	6.75902343	1.003669
47	0.15942216	9.06831460	1.44569030		47.00000000	0.73063830	6.62565794	1.025045
48	0.16958436	9.05954270	1.53635675		48.00000000	0.71541667	6.48134784	1.046382
49	0.17938782	9.07064440	1.62716312		49.00000000	0.70081633	6.35685569	1.067765
50	0.18954034	9.05194470	1.71570868		50.00000000	0.68680000	6.21687562	1.089244
51	0.19929095	9.06517510	1.80660736		51.00000000	0.67333333	6.10388457	1.110616
52	0.20944719	9.06237030	1.89808799		52.00000000	0.66038462	5.98464993	1.131982
53	0.21926852	9.06347470	1.98733468		53.00000000	0.64792453	5.87244757	1.153353
54	0.22940689	9.05490880	2.07725847		54.00000000	0.63592593	5.75825126	1.174834
55	0.23925278	9.07404520	2.17099054		55.00000000	0.62436364	5.66550386	1.196215
56	0.24937776	9.05820470	2.25891480		56.00000000	0.61321429	5.55462052	1.217557
57	0.25949901	9.05908390	2.35082330		57.00000000	0.60245614	5.45770072	1.238931
58	0.26937690	9.06408020	2.44165383		58.00000000	0.59206897	5.36656059	1.260428
59	0.27947882	9.05994990	2.53206411		59.00000000	0.58203390	5.27319796	1.281805
60	0.28933883	9.06775570	2.62365382		60.00000000	0.57233333	5.18977885	1.303151
61	0.29944965	9.05992700	2.71299197		61.00000000	0.56295082	5.10029333	1.324530
62	0.30929330	9.06025220	2.80227530		62.00000000	0.55387097	5.01821065	1.346000
63	0.31943616	9.05533890	2.89260269		63.00000000	0.54507937	4.93587838	1.367395
64	0.32924482	9.05688290	2.98193178		64.00000000	0.53656250	4.85958373	1.388757
65	0.33941075	9.06456760	3.07661169		65.00000000	0.52830769	4.78888079	1.410119
66	0.34921122	9.05759910	3.16301523		66.00000000	0.52030303	4.71269626	1.431605
67	0.35938013	9.05887030	3.25557799		67.00000000	0.51253731	4.64300905	1.452990
68	0.36953783	9.06925870	3.35143418		68.00000000	0.50500000	4.57997564	1.474368
69	0.37934577	9.05138400	3.43360423		69.00000000	0.49768116	4.50470328	1.495733
70	0.38948041	9.05147930	3.52537387		70.00000000	0.49057143	4.44039713	1.517198
71	0.39933002	9.05408380	3.61556746		71.00000000	0.48366197	4.37911602	1.538575
72	0.40946543	9.05937100	3.70949924		72.00000000	0.47694444	4.32081667	1.559961
73	0.41930237	9.05020240	3.79477132		73.00000000	0.47041096	4.25731439	1.581442
74	0.42943332	9.05047420	3.88657518		74.00000000	0.46405405	4.19990924	1.602813
75	0.43923751	9.04967690	3.97495755		75.00000000	0.45786667	4.14354540	1.624181
76	0.44942576	9.04194830	4.06368449		76.00000000	0.45184211	4.08553296	1.645556
77	0.45953882	9.02505110	4.14736133		77.00000000	0.44597403	4.02493837	1.667022
78	0.46941075	9.02532480	4.23658448		78.00000000	0.44025641	3.97345710	1.688403
79	0.47954169	9.02735420	4.32899269		79.00000000	0.43468354	3.92404232	1.709743
80	0.48935258	9.01043030	4.40927731		80.00000000	0.42925000	3.86772721	1.731123
81	0.49946046	8.99570750	4.49300021		81.00000000	0.42395062	3.81373575	1.752603
82	0.50928622	8.97875020	4.57275375		82.00000000	0.41878049	3.76012539	1.773974
83	0.51944619	8.93821240	4.64292038		83.00000000	0.41373494	3.69805077	1.795336
84	0.52922511	8.91906360	4.72019241		84.00000000	0.40880952	3.64619814	1.816713
85	0.53936648	8.85349270	4.77527719		85.00000000	0.40400000	3.57681105	1.838191
86	0.54952198	8.78572080	4.82794669		86.00000000	0.39930233	3.50815875	1.859580
87	0.55932617	8.68639370	4.85852732		87.00000000	0.39471264	3.42862942	1.880996
88	0.56948686	8.54157920	4.86431712		88.00000000	0.39022727	3.33315716	1.902380
89	0.57928437	8.36393830	4.84509873		89.00000000	0.38584270	3.22716451	1.923878
90	0.58940488	8.07225420	4.75782602		90.00000000	0.38155556	3.08001344	1.945246
91	0.59922767	7.72381780	4.62832534		91.00000000	0.37736264	2.91468026	1.966590
92	0.60932142	7.23303320	4.40724206		92.00000000	0.37326087	2.69980826	1.988061
93	0.61910105	6.60618210	4.08989427		93.00000000	0.36924731	2.43931498	2.009565
94	0.62922829	5.75476650	3.62106188		94.00000000	0.36531915	2.10232640	2.030951
95	0.63933462	4.64966630	2.97269264		95.00000000	0.36147368	1.68073201	2.052314
96	0.64913213	3.32161470	2.15616683		96.00000000	0.35770833	1.18816926	2.073681
97	0.65923703	1.62029620	1.06815925		97.00000000	0.35402062	0.57361826	2.095159
98	0.66897577	-0.38582650	-0.25810858		98.00000000	0.35040816	-0.13519676	2.116549
99	0.67902184	-2.85440090	-1.93820055		99.00000000	0.34686869	-0.99010229	2.137927
100	0.68882751	-5.68767170	-3.91782473		100.00000000	0.34340000	-1.95314646	2.159288
101	0.69910878	-9.12127690	-6.37676477		101.00000000	0.34000000	-3.10123415	2.180813
22:33 02/04/2018
Test Lot:	JK-PERC
Recipe:	Recipe_YJX-LID
Cell Name:	1-30-7h
Test Order:	3
Test Condition:	Light
1	-0.29989469	9.06096460	-2.71733517		1.00000000	34.34000000	311.15352436	0.000000
2	-0.29005820	9.06534390	-2.62947733		2.00000000	17.17000000	155.65195476	0.021590
3	-0.27991286	9.06773850	-2.53817662		3.00000000	11.44666667	103.79538003	0.042981
4	-0.27012995	9.05857660	-2.44699284		4.00000000	8.58500000	77.76788011	0.064337
5	-0.25996524	9.06413560	-2.35636019		5.00000000	6.86800000	62.25248330	0.085704
6	-0.24981317	9.06280710	-2.26400857		6.00000000	5.72333333	51.86946597	0.107187
7	-0.23999082	9.07570270	-2.17808533		7.00000000	4.90571429	44.52280439	0.128583
8	-0.22983950	9.04950330	-2.07993331		8.00000000	4.29250000	38.84499292	0.149932
9	-0.22001939	9.07442380	-1.99654919		9.00000000	3.81555556	34.62396814	0.171371
10	-0.20986137	9.05962470	-1.90126525		10.00000000	3.43400000	31.11075122	0.192860
11	-0.20001149	9.07020850	-1.81414592		11.00000000	3.12181818	28.31554181	0.214233
12	-0.18989590	9.05959800	-1.72038052		12.00000000	2.86166667	25.92554961	0.235604
13	-0.18010108	9.05500510	-1.63081620		13.00000000	2.64153846	23.91914424	0.256981
14	-0.16997880	9.07258700	-1.54214745		14.00000000	2.45285714	22.25375983	0.278451
15	-0.16011180	9.06123830	-1.45081117		15.00000000	2.28933333	20.74419488	0.299837
16	-0.14997089	9.06488510	-1.35946889		16.00000000	2.14625000	19.45550965	0.321184
17	-0.13984935	9.06738850	-1.26806839		17.00000000	2.02000000	18.31612477	0.342557
18	-0.13003966	9.06599810	-1.17893931		18.00000000	1.90777778	17.29590971	0.364024
19	-0.11989205	9.06563280	-1.08689730		19.00000000	1.80736842	16.38493844	0.385395
20	-0.11010916	9.05989840	-0.99757780		20.00000000	1.71700000	15.55584555	0.406750
21	-0.09994146	9.06742860	-0.90621207		21.00000000	1.63523810	14.82740467	0.428126
22	-0.09012805	9.06884670	-0.81735746		22.00000000	1.56090909	14.15564526	0.449609
23	-0.07997227	9.04772760	-0.72356729		23.00000000	1.49304348	13.50865069	0.470989
24	-0.07011569	9.07674220	-0.63642200		24.00000000	1.43083333	12.98730530	0.492360
25	-0.05999339	9.05972000	-0.54352335		25.00000000	1.37360000	12.44443139	0.513717
26	-0.04981677	9.06781390	-0.45172919		26.00000000	1.32076923	11.97648959	0.535192
27	-0.04003015	9.05807780	-0.36259619		27.00000000	1.27185185	11.52053302	0.556573
28	-0.02985799	9.05125520	-0.27025227		28.00000000	1.22642857	11.10071798	0.577944
29	-0.02003788	9.07080080	-0.18175958		29.00000000	1.18413793	10.74107929	0.599288
30	-0.00990144	9.06301400	-0.08973691		30.00000000	1.14466667	10.37413003	0.620762
31	-0.00068495	9.05150600	-0.00619980		31.00000000	1.10774194	10.02673278	0.642295
32	0.00949817	9.07177930	0.08616530		32.00000000	1.07312500	9.73515316	0.663692
33	0.01931056	9.06622030	0.17507377		33.00000000	1.04060606	9.43436379	0.685159
34	0.02946308	9.06381320	0.26704783		34.00000000	1.01000000	9.15445133	0.706539
35	0.03929110	9.07062440	0.35639477		35.00000000	0.98114286	8.89957834	0.727884
36	0.04941831	9.04711820	0.44709331		36.00000000	0.95388889	8.62994553	0.749249
37	0.05928057	9.05939770	0.53704623		37.00000000	0.92810811	8.40810046	0.770726
38	0.06937354	9.06747340	0.62904274		38.00000000	0.90368421	8.19413254	0.792100
39	0.07955137	9.05078510	0.72000235		39.00000000	0.88051282	7.96933232	0.813437
40	0.08933324	9.07984450	0.81113196		40.00000000	0.85850000	7.79504650	0.834816
41	0.09953041	9.06574630	0.90231748		41.00000000	0.83756098	7.59311532	0.856301
42	0.10934132	9.05307770	0.98987547		42.00000000	0.81761905	7.40196877	0.877682
43	0.11947969	9.05871490	1.08233245		43.00000000	0.79860465	7.23433185	0.899037
44	0.12931664	9.06298260	1.17199446		44.00000000	0.78045455	7.07324597	0.920414
45	0.13943939	9.06319810	1.26376681		45.00000000	0.76311111	6.91622717	0.941879
46	0.14929792	9.05910210	1.35250510		46.00000000	0.74652174	6.76281665	0.963258
47	0.15943854	9.06486320	1.44528855		47.00000000	0.73063830	6.62313622	0.984607
48	0.16956650	9.05514530	1.53544930		48.00000000	0.71541667	6.47820187	1.005987
49	0.17936772	9.07132820	1.62710346		49.00000000	0.70081633	6.35733491	1.027467
50	0.18949494	9.05928610	1.71668888		50.00000000	0.68680000	6.22191769	1.048836
51	0.19929840	9.06614690	1.80686857		51.00000000	0.67333333	6.10453891	1.070200
52	0.20942114	9.05643080	1.89660806		52.00000000	0.66038462	5.98072757	1.091581
53	0.21925883	9.07658390	1.99012117		53.00000000	0.64792453	5.88094134	1.113056
54	0.22941954	9.05510710	2.07741851		54.00000000	0.63592593	5.75837737	1.134440
55	0.23924980	9.07061770	2.17014347		55.00000000	0.62436364	5.66336385	1.155802
56	0.24938519	9.05841450	2.25903442		56.00000000	0.61321429	5.55474918	1.177168
57	0.25954515	9.06882000	2.35376825		57.00000000	0.60245614	5.46356629	1.198632
58	0.26936498	9.04302120	2.43587322		58.00000000	0.59206897	5.35409221	1.219998
59	0.27949667	9.08047680	2.53796303		59.00000000	0.58203390	5.28514531	1.241381
60	0.28929567	9.05394080	2.61926587		60.00000000	0.57233333	5.18187212	1.262742
61	0.29944447	9.07074070	2.71618314		61.00000000	0.56295082	5.10638091	1.284221
62	0.30928811	9.06199260	2.80276656		62.00000000	0.55387097	5.01917461	1.305614
63	0.31942201	9.05883220	2.89359039		63.00000000	0.54507937	4.93778250	1.326994
64	0.32926047	9.05241390	2.98060206		64.00000000	0.53656250	4.85718583	1.348479
65	0.33941224	9.06361960	3.07630343		65.00000000	0.52830769	4.78837995	1.369922
66	0.34924397	9.05714130	3.16315198		66.00000000	0.52030303	4.71245806	1.391288
67	0.35941139	9.05543230	3.25462551		67.00000000	0.51253731	4.64124694	1.412669
68	0.36955050	9.05241200	3.34532338		68.00000000	0.50500000	4.57146806	1.434160
69	0.37937406	9.06220150	3.43796418		69.00000000	0.49768116	4.51008695	1.455552
70	0.38952062	9.06097320	3.52943590		70.00000000	0.49057143	4.44505457	1.476891
71	0.39934641	9.05032250	3.61421380		71.00000000	0.48366197	4.37729683	1.498277
72	0.40947881	9.05396080	3.70740509		72.00000000	0.47694444	4.31823630	1.519757
73	0.41928601	9.05165290	3.79523143		73.00000000	0.47041096	4.25799672	1.541118
74	0.42944595	9.04751210	3.88541743		74.00000000	0.46405405	4.19853467	1.562486
75	0.43927249	9.04967980	3.97527538		75.00000000	0.45786667	4.14354672	1.583860
76	0.44941682	9.03627590	4.06105438		76.00000000	0.45184211	4.08296993	1.605341
77	0.45956415	9.03129960	4.15046152		77.00000000	0.44597403	4.02772504	1.626715
78	0.46941149	9.02356240	4.23576387		78.00000000	0.44025641	3.97268119	1.648058
79	0.47958040	9.01785660	4.32478728		79.00000000	0.43468354	3.91991387	1.669449
80	0.48938608	9.02325060	4.41585324		80.00000000	0.42925000	3.87323032	1.690936
81	0.49951404	8.99306580	4.49216263		81.00000000	0.42395062	3.81261580	1.712316
82	0.50933164	8.95634270	4.56174872		82.00000000	0.41878049	3.75074156	1.733672
83	0.51948935	8.95437720	4.65170359		83.00000000	0.41373494	3.70473871	1.755056
84	0.52924150	8.89931110	4.70988476		84.00000000	0.40880952	3.63812313	1.776533
85	0.53938806	8.86326890	4.78074142		85.00000000	0.40400000	3.58076064	1.797918
86	0.54953235	8.77180290	4.82038946		86.00000000	0.39930233	3.50260130	1.819283
87	0.55937004	8.67451190	4.85226207		87.00000000	0.39471264	3.42393952	1.840648
88	0.56947720	8.53273300	4.85919690		88.00000000	0.39022727	3.32970513	1.862132
89	0.57930374	8.34031870	4.83157782		89.00000000	0.38584270	3.21805106	1.883509
90	0.58944207	8.06822110	4.75574895		90.00000000	0.38155556	3.07847458	1.904903
91	0.59925079	7.70083620	4.61473218		91.00000000	0.37736264	2.90600786	1.926256
92	0.60933256	7.22367100	4.40161794		92.00000000	0.37326087	2.69631372	1.947723
93	0.61912113	6.58597560	4.07751666		93.00000000	0.36924731	2.43185379	1.969114
94	0.62922752	5.72766350	3.60400350		94.00000000	0.36531915	2.09242516	1.990603
95	0.63938004	4.63459830	2.96326965		95.00000000	0.36147368	1.67528532	2.012104
96	0.64913958	3.30113010	2.14289421		96.00000000	0.35770833	1.18084175	2.033485
97	0.65927202	1.60265120	1.05658309		97.00000000	0.35402062	0.56737157	2.054836
98	0.66903377	-0.40839332	-0.27322892		98.00000000	0.35040816	-0.14310435	2.076206
99	0.67909181	-2.84483860	-1.93190659		99.00000000	0.34686869	-0.98678543	2.097693
100	0.68877470	-5.66904350	-3.90469374		100.00000000	0.34340000	-1.94674954	2.119078
101	0.69904107	-9.04472640	-6.32263522		101.00000000	0.34000000	-3.07520698	2.140416
22:33 02/04/2018
Test Lot:	JK-PERC
Recipe:	Recipe_YJX-LID
Cell Name:	1-30-7h
Test Order:	4
Test Condition:	Light
1	-0.29991111	9.06371970	-2.71831024		1.00000000	34.34000000	311.24813450	0.000000
2	-0.29011178	9.05269050	-2.62629215		2.00000000	17.17000000	155.43469589	0.061799
3	-0.27997082	9.07141970	-2.53973281		3.00000000	11.44666667	103.83751750	0.083228
4	-0.27011791	9.05535510	-2.44601359		4.00000000	8.58500000	77.74022353	0.104709
5	-0.25997028	9.06483460	-2.35658759		5.00000000	6.86800000	62.25728403	0.126098
6	-0.24983230	9.06335740	-2.26431942		6.00000000	5.72333333	51.87261552	0.147454
7	-0.23999129	9.06161210	-2.17470798		7.00000000	4.90571429	44.45367993	0.168817
8	-0.22985630	9.06308360	-2.08320686		8.00000000	4.29250000	38.90328635	0.190291
9	-0.22004209	9.07160850	-1.99613569		9.00000000	3.81555556	34.61322621	0.211674
10	-0.20988105	9.06224920	-1.90199438		10.00000000	3.43400000	31.11976375	0.233110
11	-0.20005046	9.06838040	-1.81413367		11.00000000	3.12181818	28.30983481	0.254493
12	-0.18989463	9.05712410	-1.71989923		12.00000000	2.86166667	25.91847013	0.275987
13	-0.18013401	9.05742840	-1.63155090		13.00000000	2.64153846	23.92554548	0.297368
14	-0.17000051	9.08073040	-1.54372880		14.00000000	2.45285714	22.27373442	0.318754
15	-0.16017215	9.05255510	-1.44996721		15.00000000	2.28933333	20.72431614	0.340243
16	-0.15001185	9.07371230	-1.36116437		16.00000000	2.14625000	19.47445502	0.361617
17	-0.13988207	9.06950190	-1.26866070		17.00000000	2.02000000	18.32039384	0.382974
18	-0.13003585	9.05757520	-1.17780949		18.00000000	1.90777778	17.27984069	0.404337
19	-0.11986811	9.06864930	-1.08704185		19.00000000	1.80736842	16.39039037	0.425812
20	-0.11004943	9.06512450	-0.99761178		20.00000000	1.71700000	15.56481877	0.447186
21	-0.09989806	9.04980950	-0.90405844		21.00000000	1.63523810	14.79859325	0.468539
22	-0.09006004	9.08250430	-0.81797070		22.00000000	1.56090909	14.17696353	0.489926
23	-0.07991314	9.05393700	-0.72352853		23.00000000	1.49304348	13.51792159	0.511408
24	-0.07011977	9.07298660	-0.63619572		24.00000000	1.43083333	12.98193166	0.532784
25	-0.05993863	9.06398490	-0.54328282		25.00000000	1.37360000	12.45028966	0.554147
26	-0.04984308	9.05100150	-0.45112979		26.00000000	1.32076923	11.95428429	0.575524
27	-0.04003557	9.07348250	-0.36326206		27.00000000	1.27185185	11.54012552	0.597015
28	-0.02984326	9.05662540	-0.27027925		28.00000000	1.22642857	11.10730415	0.618404
29	-0.02000598	9.05748840	-0.18120397		29.00000000	1.18413793	10.72531557	0.639745
30	-0.00985982	9.06745820	-0.08940353		30.00000000	1.14466667	10.37921715	0.661128
31	-0.00068124	9.05734830	-0.00617022		31.00000000	1.10774194	10.03320454	0.682725
32	0.00950118	9.06235120	0.08610306		32.00000000	1.07312500	9.72503563	0.704103
33	0.01930097	9.06758500	0.17501318		33.00000000	1.04060606	9.43578391	0.725468
34	0.02945652	9.06354900	0.26698059		34.00000000	1.01000000	9.15418449	0.746845
35	0.03926002	9.06111620	0.35573962		35.00000000	0.98114286	8.89024944	0.768325
36	0.04942525	9.05825610	0.44770655		36.00000000	0.95388889	8.64056985	0.789711
37	0.05922727	9.06269360	0.53675856		37.00000000	0.92810811	8.41115941	0.811081
38	0.06936421	9.07443330	0.62944085		38.00000000	0.90368421	8.20042209	0.832444
39	0.07953166	9.05219940	0.71993646		39.00000000	0.88051282	7.97057763	0.853918
40	0.08933145	9.06553840	0.80983767		40.00000000	0.85850000	7.78276472	0.875302
41	0.09950337	9.06516650	0.90201460		41.00000000	0.83756098	7.59262970	0.896675
42	0.10926519	9.06620120	0.99062020		42.00000000	0.81761905	7.41269879	0.918045
43	0.11944382	9.05918500	1.08206366		43.00000000	0.79860465	7.23470728	0.939518
44	0.12927113	9.05237960	1.17021134		44.00000000	0.78045455	7.06497081	0.960891
45	0.13943115	9.06817720	1.26438638		45.00000000	0.76311111	6.92002678	0.982286
46	0.14922796	9.05678370	1.35152536		46.00000000	0.74652174	6.76108592	1.003770
47	0.15938053	9.07671830	1.44665217		47.00000000	0.73063830	6.63179801	1.025151
48	0.16953459	9.06313420	1.53651474		48.00000000	0.71541667	6.48391726	1.046506
49	0.17935522	9.06785870	1.62636779		49.00000000	0.70081633	6.35490342	1.067883
50	0.18951151	9.06389620	1.71771266		50.00000000	0.68680000	6.22508391	1.089359
51	0.19930087	9.05627160	1.80492281		51.00000000	0.67333333	6.09788954	1.110735
52	0.20947130	9.06941030	1.89978117		52.00000000	0.66038462	5.98929903	1.132074
53	0.21926662	9.05347440	1.98512473		53.00000000	0.64792453	5.86596813	1.153448
54	0.22938868	9.06984620	2.08052005		54.00000000	0.63592593	5.76775034	1.174929
55	0.23924503	9.04801270	2.16469207		55.00000000	0.62436364	5.64925011	1.196293
56	0.24938421	9.06843570	2.26152467		56.00000000	0.61321429	5.56089432	1.217650
57	0.25953603	9.05961610	2.35129680		57.00000000	0.60245614	5.45802135	1.239029
58	0.26936334	9.06753440	2.44246135		58.00000000	0.59206897	5.36860571	1.260508
59	0.27950549	9.05348490	2.53049873		59.00000000	0.58203390	5.26943511	1.281899
60	0.28933582	9.05504320	2.61994835		60.00000000	0.57233333	5.18250306	1.303252
61	0.29948762	9.06822200	2.71582022		61.00000000	0.56295082	5.10496301	1.324628
62	0.30930379	9.05993460	2.80227211		62.00000000	0.55387097	5.01803474	1.346113
63	0.31942138	9.05338290	2.89184406		63.00000000	0.54507937	4.93481220	1.367486
64	0.32926956	9.05467610	2.98142922		64.00000000	0.53656250	4.85839964	1.388851
65	0.33941469	9.05334950	3.07283981		65.00000000	0.52830769	4.78295418	1.410221
66	0.34923530	9.06712910	3.16656155		66.00000000	0.52030303	4.71765475	1.431699
67	0.35937074	9.05404190	3.25375774		67.00000000	0.51253731	4.64053431	1.453085
68	0.36954191	9.06201740	3.34879522		68.00000000	0.50500000	4.57631879	1.474455
69	0.37931269	9.05837250	3.43595564		69.00000000	0.49768116	4.50818133	1.495820
70	0.38950694	9.04380230	3.52262376		70.00000000	0.49057143	4.43663101	1.517288
71	0.39934319	9.05591300	3.61641719		71.00000000	0.48366197	4.38000074	1.538656
72	0.40949577	9.05476470	3.70788784		72.00000000	0.47694444	4.31861972	1.560037
73	0.41926876	9.04763220	3.79338953		73.00000000	0.47041096	4.25610534	1.581382
74	0.42942801	9.05565740	3.88875294		74.00000000	0.46405405	4.20231453	1.602868
75	0.43924791	9.04027080	3.97092005		75.00000000	0.45786667	4.13923866	1.624244
76	0.44939974	9.04104140	4.06304165		76.00000000	0.45184211	4.08512318	1.645624
77	0.45952922	9.03297810	4.15091738		77.00000000	0.44597403	4.02847361	1.667102
78	0.46937814	9.03230860	4.23956821		78.00000000	0.44025641	3.97653176	1.688479
79	0.47955230	9.01224040	4.32184061		79.00000000	0.43468354	3.91747260	1.709834
80	0.48937961	9.01501750	4.41176575		80.00000000	0.42925000	3.86969626	1.731211
81	0.49947637	8.98578450	4.48818702		81.00000000	0.42395062	3.80952889	1.752697
82	0.50934833	8.98175050	4.57483962		82.00000000	0.41878049	3.76138186	1.774074
83	0.51944804	8.93887620	4.64328172		83.00000000	0.41373494	3.69832541	1.795428
84	0.52926350	8.91406920	4.71789146		84.00000000	0.40880952	3.64415638	1.816808
85	0.53936768	8.85163880	4.77428788		85.00000000	0.40400000	3.57606208	1.838295
86	0.54952097	8.77905750	4.82427619		86.00000000	0.39930233	3.50549808	1.859656
87	0.55935949	8.68157010	4.85611862		87.00000000	0.39471264	3.42672549	1.881021
88	0.56948751	8.53755000	4.86202809		88.00000000	0.39022727	3.33158485	1.902402
89	0.57928729	8.35031030	4.83722862		89.00000000	0.38584270	3.22190624	1.923931
90	0.58941674	8.07108880	4.75723485		90.00000000	0.38155556	3.07956877	1.945307
91	0.59920985	7.71227650	4.62127204		91.00000000	0.37736264	2.91032500	1.966649
92	0.60934156	7.23508020	4.40863506		92.00000000	0.37326087	2.70057233	1.988142
93	0.61914289	6.59781460	4.08499000		93.00000000	0.36924731	2.43622530	2.009648
94	0.62926048	5.74084470	3.61248669		94.00000000	0.36531915	2.09724050	2.031025
95	0.63937879	4.65096660	2.97372940		95.00000000	0.36147368	1.68120203	2.052392
96	0.64914954	3.31733510	2.15344655		96.00000000	0.35770833	1.18663841	2.073769
97	0.65925300	1.60300920	1.05678862		97.00000000	0.35402062	0.56749831	2.095259
98	0.66900069	-0.39911318	-0.26700699		98.00000000	0.35040816	-0.13985252	2.116644
99	0.67906022	-2.85816190	-1.94086405		99.00000000	0.34686869	-0.99140687	2.138012
100	0.68876624	-5.68133210	-3.91310975		100.00000000	0.34340000	-1.95096944	2.159372
101	0.69907957	-9.10147190	-6.36265306		101.00000000	0.34000000	-3.09450045	2.180882
