# Supplementary material for: Study on the Electrical Injection Regeneration of Industrialized B-Doped Czochralski Silicon PERC Solar Cells
Source: Hindawi journal article supplement (doi:10.1155/2019/5357370), 2019-06-20
Supplement: f1 [file 5357370.f1.zip › section3.2/IVRawData_1-30-8h.csv]

23:35 02/04/2018
Test Lot:	JK-PERC
Recipe:	Recipe_YJX-LID
Cell Name:	1-30-8h
Test Order:	2
Test Condition:	Light
1	-0.29976606	9.06432440	-2.71717681		1.00000000	34.34000000	311.26889990	0.000000
2	-0.28999400	9.05178830	-2.62496430		2.00000000	17.17000000	155.41920511	0.061786
3	-0.27981627	9.06024460	-2.53520385		3.00000000	11.44666667	103.70959985	0.083209
4	-0.26999208	9.05588720	-2.44501782		4.00000000	8.58500000	77.74479161	0.104705
5	-0.25987393	9.07446290	-2.35821634		5.00000000	6.86800000	62.32341120	0.126079
6	-0.24968056	9.05366230	-2.26052347		6.00000000	5.72333333	51.81712723	0.147453
7	-0.23988317	9.05087570	-2.17115275		7.00000000	4.90571429	44.40101022	0.168817
8	-0.22967643	9.06701950	-2.08248067		8.00000000	4.29250000	38.92018120	0.190332
9	-0.21987234	9.05007460	-1.98986108		9.00000000	3.81555556	34.53106242	0.211732
10	-0.20971248	9.06950280	-1.90198792		10.00000000	3.43400000	31.14467262	0.233124
11	-0.19988979	9.05891420	-1.81078446		11.00000000	3.12181818	28.28028306	0.254480
12	-0.18975896	9.06055160	-1.71932085		12.00000000	2.86166667	25.92827850	0.275950
13	-0.18001145	9.06413940	-1.63164888		13.00000000	2.64153846	23.94327285	0.297310
14	-0.16982999	9.05118080	-1.53716194		14.00000000	2.45285714	22.20125348	0.318696
15	-0.16000359	9.05323510	-1.44855012		15.00000000	2.28933333	20.72587289	0.340188
16	-0.14985117	9.05952170	-1.35757993		16.00000000	2.14625000	19.44399845	0.361560
17	-0.13975607	9.04712770	-1.26439101		17.00000000	2.02000000	18.27519795	0.382920
18	-0.12990509	9.06753350	-1.17791876		18.00000000	1.90777778	17.29883891	0.404286
19	-0.11979733	9.04787350	-1.08391109		19.00000000	1.80736842	16.35284084	0.425770
20	-0.10994934	9.06557080	-0.99675353		20.00000000	1.71700000	15.56558506	0.447170
21	-0.09978948	9.07007690	-0.90509824		21.00000000	1.63523810	14.83173527	0.468510
22	-0.08993702	9.05737880	-0.81459362		22.00000000	1.56090909	14.13774491	0.489880
23	-0.07984190	9.05152990	-0.72269138		23.00000000	1.49304348	13.51432769	0.511370
24	-0.07000731	9.05592730	-0.63398110		24.00000000	1.43083333	12.95752265	0.532748
25	-0.05986903	9.06615350	-0.54278183		25.00000000	1.37360000	12.45326845	0.554088
26	-0.04975234	9.05816650	-0.45066498		26.00000000	1.32076923	11.96374760	0.575467
27	-0.03992295	9.06757740	-0.36200447		27.00000000	1.27185185	11.53261511	0.596941
28	-0.02974523	9.05779930	-0.26942631		28.00000000	1.22642857	11.10874386	0.618315
29	-0.01993147	9.06330010	-0.18064492		29.00000000	1.18413793	10.73219743	0.639675
30	-0.00979394	9.05173970	-0.08865220		30.00000000	1.14466667	10.36122471	0.661050
31	-0.00062922	9.04793830	-0.00569318		31.00000000	1.10774194	10.02278068	0.682642
32	0.00959593	9.06072810	0.08694608		32.00000000	1.07312500	9.72329384	0.704018
33	0.01936177	9.05330180	0.17528793		33.00000000	1.04060606	9.42092072	0.725382
34	0.02951911	9.06285950	0.26752752		34.00000000	1.01000000	9.15348810	0.746768
35	0.03934003	9.05797670	0.35634105		35.00000000	0.98114286	8.88716914	0.768250
36	0.04952788	9.05333520	0.44839254		36.00000000	0.95388889	8.63587585	0.789624
37	0.05935253	9.07088470	0.53837991		37.00000000	0.92810811	8.41876164	0.810996
38	0.06947041	9.04914470	0.62864782		38.00000000	0.90368421	8.17756918	0.832358
39	0.07964338	9.05670640	0.72130675		39.00000000	0.88051282	7.97454610	0.853835
40	0.08949408	9.05926800	0.81075085		40.00000000	0.85850000	7.77738158	0.875220
41	0.09964174	9.05289460	0.90204617		41.00000000	0.83756098	7.58235123	0.896602
42	0.10940014	9.05052190	0.99012836		42.00000000	0.81761905	7.39987910	0.917938
43	0.11953440	9.06093880	1.08309388		43.00000000	0.79860465	7.23610787	0.939408
44	0.12941636	9.04666040	1.17078586		44.00000000	0.78045455	7.06050723	0.960783
45	0.13950448	9.07762810	1.26636979		45.00000000	0.76311111	6.92723887	0.982166
46	0.14935815	9.05845170	1.35295359		46.00000000	0.74652174	6.76233112	1.003652
47	0.15947008	9.04455760	1.44233632		47.00000000	0.73063830	6.60830017	1.025020
48	0.16967654	9.06462860	1.53805482		48.00000000	0.71541667	6.48498638	1.046458
49	0.17942080	9.06761070	1.62691797		49.00000000	0.70081633	6.35472962	1.067847
50	0.18955953	9.05440330	1.71634843		50.00000000	0.68680000	6.21856419	1.089331
51	0.19937226	9.04999450	1.80431786		51.00000000	0.67333333	6.09366296	1.110731
52	0.20955864	9.05581380	1.89772402		52.00000000	0.66038462	5.98032011	1.132079
53	0.21938550	9.07210250	1.99028774		53.00000000	0.64792453	5.87803773	1.153446
54	0.22949000	9.06307790	2.07988575		54.00000000	0.63592593	5.76344621	1.174939
55	0.23931986	9.04578400	2.16483576		55.00000000	0.62436364	5.64785859	1.196317
56	0.24948241	9.05566690	2.25922960		56.00000000	0.61321429	5.55306431	1.217683
57	0.25963601	9.05580710	2.35121362		57.00000000	0.60245614	5.45572659	1.239062
58	0.26949936	9.05997560	2.44165763		58.00000000	0.59206897	5.36413038	1.260543
59	0.27956739	9.04796890	2.52951705		59.00000000	0.58203390	5.26622461	1.281975
60	0.28940767	9.05639460	2.62099006		60.00000000	0.57233333	5.18327651	1.303322
61	0.29953969	9.04427050	2.70911798		61.00000000	0.56295082	5.09147949	1.324698
62	0.30935839	9.05041030	2.79982036		62.00000000	0.55387097	5.01275951	1.346174
63	0.31954327	9.06485840	2.89661450		63.00000000	0.54507937	4.94106726	1.367546
64	0.32934409	9.04270650	2.97816194		64.00000000	0.53656250	4.85197721	1.388895
65	0.33948579	9.06392770	3.07707466		65.00000000	0.52830769	4.78854273	1.410268
66	0.34934542	9.04720120	3.16059830		66.00000000	0.52030303	4.70728620	1.431749
67	0.35942385	9.04412170	3.25067304		67.00000000	0.51253731	4.63544984	1.453127
68	0.36968020	9.05440330	3.34723362		68.00000000	0.50500000	4.57247367	1.474504
69	0.37941775	9.04707430	3.43262057		69.00000000	0.49768116	4.50255843	1.495865
70	0.38966963	9.05133630	3.52703087		70.00000000	0.49057143	4.44032698	1.517333
71	0.39944515	9.03604510	3.60940439		71.00000000	0.48366197	4.37039139	1.538730
72	0.40955931	9.03897190	3.70199509		72.00000000	0.47694444	4.31108743	1.560110
73	0.41937947	9.04411890	3.79291779		73.00000000	0.47041096	4.25445264	1.581469
74	0.42956287	9.03120040	3.87946836		74.00000000	0.46405405	4.19096516	1.602948
75	0.43931457	9.02974700	3.96689942		75.00000000	0.45786667	4.13442016	1.624319
76	0.44947413	9.02504540	4.05652443		76.00000000	0.45184211	4.07789551	1.645715
77	0.45964414	9.02233030	4.14706125		77.00000000	0.44597403	4.02372497	1.667193
78	0.46949556	9.02164270	4.23562119		78.00000000	0.44025641	3.97183603	1.688575
79	0.47963876	9.00150870	4.31747247		79.00000000	0.43468354	3.91280771	1.709934
80	0.48940906	8.99903870	4.40421107		80.00000000	0.42925000	3.86283736	1.731306
81	0.49959022	8.98729710	4.48996574		81.00000000	0.42395062	3.81017015	1.752778
82	0.50940001	8.96141910	4.56494698		82.00000000	0.41878049	3.75286746	1.774165
83	0.51956552	8.92842010	4.63889923		83.00000000	0.41373494	3.69399935	1.795510
84	0.52938497	8.86708450	4.69410126		84.00000000	0.40880952	3.62494859	1.816884
85	0.53947973	8.84785750	4.77323978		85.00000000	0.40400000	3.57453443	1.838374
86	0.54961330	8.75802900	4.81352922		86.00000000	0.39930233	3.49710135	1.859761
87	0.55945653	8.65524200	4.84223166		87.00000000	0.39471264	3.41633345	1.881151
88	0.56958705	8.52458190	4.85549146		88.00000000	0.39022727	3.32652435	1.902524
89	0.57933354	8.29804230	4.80733422		89.00000000	0.38584270	3.20173902	1.924005
90	0.58949834	8.04828450	4.74445035		90.00000000	0.38155556	3.07086766	1.945394
91	0.59927613	7.66503100	4.59347011		91.00000000	0.37736264	2.89249631	1.966749
92	0.60940289	7.20231150	4.38910944		92.00000000	0.37326087	2.68834105	1.988224
93	0.61920303	6.55559400	4.05924367		93.00000000	0.36924731	2.42063546	2.009724
94	0.62932390	5.70326280	3.58919959		94.00000000	0.36531915	2.08351111	2.031102
95	0.63945293	4.60505960	2.94471885		95.00000000	0.36147368	1.66460786	2.052438
96	0.64922398	3.27280160	2.12478128		96.00000000	0.35770833	1.17070841	2.073819
97	0.65931284	1.57508040	1.03847073		97.00000000	0.35402062	0.55761094	2.095307
98	0.66908169	-0.43477944	-0.29090296		98.00000000	0.35040816	-0.15235026	2.116682
99	0.67915934	-2.88719680	-1.96086667		99.00000000	0.34686869	-1.00147816	2.138046
100	0.68888801	-5.70397280	-3.92939847		100.00000000	0.34340000	-1.95874426	2.159415
101	0.69917709	-9.11276150	-6.37143407		101.00000000	0.34000000	-3.09833891	2.180886
23:35 02/04/2018
Test Lot:	JK-PERC
Recipe:	Recipe_YJX-LID
Cell Name:	1-30-8h
Test Order:	3
Test Condition:	Light
1	-0.29981992	9.05504890	-2.71488404		1.00000000	34.34000000	310.95037923	0.000000
2	-0.29001212	9.07406140	-2.63158778		2.00000000	17.17000000	155.80163424	0.061787
3	-0.27988428	9.05581000	-2.53457886		3.00000000	11.44666667	103.65883847	0.083205
4	-0.27005047	9.05815320	-2.44615853		4.00000000	8.58500000	77.76424522	0.104732
5	-0.25989804	9.05335810	-2.35295003		5.00000000	6.86800000	62.17846343	0.126122
6	-0.24972108	9.06419560	-2.26352071		6.00000000	5.72333333	51.87741282	0.147522
7	-0.23991255	9.04782960	-2.17068787		7.00000000	4.90571429	44.38606692	0.168868
8	-0.22979960	9.05926800	-2.08181616		8.00000000	4.29250000	38.88690789	0.190353
9	-0.21995758	9.06628040	-1.99419710		9.00000000	3.81555556	34.59289655	0.211741
10	-0.20979029	9.04658130	-1.89788491		10.00000000	3.43400000	31.06596018	0.233126
11	-0.19997506	9.07893280	-1.81556013		11.00000000	3.12181818	28.34277749	0.254593
12	-0.18983009	9.04380610	-1.71678653		12.00000000	2.86166667	25.88035846	0.275976
13	-0.18008409	9.06706620	-1.63283437		13.00000000	2.64153846	23.95100410	0.297324
14	-0.16996072	9.06901840	-1.54137690		14.00000000	2.45285714	22.24500656	0.318697
15	-0.16011572	9.05812450	-1.45034813		15.00000000	2.28933333	20.73706636	0.340178
16	-0.14995214	9.05284310	-1.35749320		16.00000000	2.14625000	19.42966450	0.361561
17	-0.13981538	9.06103990	-1.26687274		17.00000000	2.02000000	18.30330060	0.382926
18	-0.13001354	9.05488870	-1.17725813		18.00000000	1.90777778	17.27471544	0.404302
19	-0.11985891	9.06100850	-1.08604260		19.00000000	1.80736842	16.37658063	0.425779
20	-0.11001316	9.05616570	-0.99629741		20.00000000	1.71700000	15.54943651	0.447158
21	-0.09990765	9.06542210	-0.90570504		21.00000000	1.63523810	14.82412357	0.468504
22	-0.09004255	9.06726260	-0.81643948		22.00000000	1.56090909	14.15317262	0.489882
23	-0.07988866	9.05746360	-0.72358867		23.00000000	1.49304348	13.52318696	0.511363
24	-0.07011735	9.06146720	-0.63536610		24.00000000	1.43083333	12.96544932	0.532735
25	-0.05995825	9.05614190	-0.54299041		25.00000000	1.37360000	12.43951651	0.554134
26	-0.04981031	9.05706500	-0.45113524		26.00000000	1.32076923	11.96229277	0.575516
27	-0.03999136	9.05040930	-0.36193821		27.00000000	1.27185185	11.51077983	0.596996
28	-0.02977048	9.05747510	-0.26964542		28.00000000	1.22642857	11.10834625	0.618378
29	-0.02005723	9.04716010	-0.18146093		29.00000000	1.18413793	10.71308544	0.639742
30	-0.00982444	9.06447600	-0.08905338		30.00000000	1.14466667	10.37580353	0.661112
31	-0.00067313	9.05582810	-0.00609578		31.00000000	1.10774194	10.03152055	0.682704
32	0.00951330	9.05996040	0.08619010		32.00000000	1.07312500	9.72247000	0.704092
33	0.01927317	9.05186460	0.17445813		33.00000000	1.04060606	9.41942516	0.725456
34	0.02947441	9.06399540	0.26715588		34.00000000	1.01000000	9.15463535	0.746824
35	0.03929829	9.05015280	0.35565552		35.00000000	0.98114286	8.87949278	0.768295
36	0.04945338	9.05667110	0.44788298		36.00000000	0.95388889	8.63905793	0.789674
37	0.05925195	9.04912950	0.53617860		37.00000000	0.92810811	8.39857046	0.811065
38	0.06940705	9.05348010	0.62837531		38.00000000	0.90368421	8.18148702	0.832407
39	0.07955320	9.06398200	0.72106879		39.00000000	0.88051282	7.98095236	0.853878
40	0.08935103	9.06113340	0.80962158		40.00000000	0.85850000	7.77898302	0.875260
41	0.09950538	9.04843040	0.90036751		41.00000000	0.83756098	7.57861219	0.896639
42	0.10927716	9.06870460	0.99100228		42.00000000	0.81761905	7.41474562	0.918125
43	0.11948658	9.05756860	1.08225790		43.00000000	0.79860465	7.23341641	0.939499
44	0.12929557	9.05786900	1.17114234		44.00000000	0.78045455	7.06925503	0.960851
45	0.13947597	9.05328850	1.26271620		45.00000000	0.76311111	6.90866505	0.982239
46	0.14921352	9.06069090	1.35197758		46.00000000	0.74652174	6.76400273	1.003710
47	0.15940879	9.05160810	1.44290589		47.00000000	0.73063830	6.61345154	1.025107
48	0.16955718	9.05886360	1.53599537		48.00000000	0.71541667	6.48086200	1.046471
49	0.17932153	9.05722810	1.62415600		49.00000000	0.70081633	6.34745333	1.067843
50	0.18947959	9.05857370	1.71641483		50.00000000	0.68680000	6.22142842	1.089323
51	0.19924393	9.04525660	1.80221247		51.00000000	0.67333333	6.09047278	1.110713
52	0.20944665	9.05973340	1.89753081		52.00000000	0.66038462	5.98290856	1.132080
53	0.21927723	9.05484390	1.98552109		53.00000000	0.64792453	5.86685546	1.153468
54	0.22938395	9.06566430	2.07951789		54.00000000	0.63592593	5.76509096	1.174940
55	0.23918848	9.04984860	2.16461953		55.00000000	0.62436364	5.65039638	1.196318
56	0.24937408	9.05055140	2.25697293		56.00000000	0.61321429	5.54992741	1.217681
57	0.25954255	9.04205040	2.34679682		57.00000000	0.60245614	5.44743878	1.239062
58	0.26934412	9.05612560	2.43921418		58.00000000	0.59206897	5.36185092	1.260537
59	0.27952898	9.05488010	2.53110140		59.00000000	0.58203390	5.27024716	1.281925
60	0.28927472	9.05901430	2.62054383		60.00000000	0.57233333	5.18477585	1.303279
61	0.29945883	9.05623250	2.71196879		61.00000000	0.56295082	5.09821351	1.324654
62	0.30927899	9.04974170	2.79889497		62.00000000	0.55387097	5.01238919	1.346139
63	0.31943110	9.04678820	2.88982551		63.00000000	0.54507937	4.93121757	1.367507
64	0.32928997	9.06623650	2.98542075		64.00000000	0.53656250	4.86460252	1.388869
65	0.33943909	9.05777070	3.07456144		65.00000000	0.52830769	4.78528994	1.410240
66	0.34917814	9.04739760	3.15915347		66.00000000	0.52030303	4.70738839	1.431719
67	0.35936075	9.05400090	3.25365255		67.00000000	0.51253731	4.64051330	1.453094
68	0.36952478	9.05206490	3.34496229		68.00000000	0.50500000	4.57129277	1.474486
69	0.37942755	9.04627420	3.43240566		69.00000000	0.49768116	4.50216023	1.495833
70	0.38951939	9.04683020	3.52391578		70.00000000	0.49057143	4.43811642	1.517309
71	0.39938793	9.04067520	3.61073655		71.00000000	0.48366197	4.37263079	1.538693
72	0.40946338	9.04936500	3.70538358		72.00000000	0.47694444	4.31604436	1.560081
73	0.41926938	9.03770160	3.78923155		73.00000000	0.47041096	4.25143388	1.581563
74	0.42945871	9.04127310	3.88285348		74.00000000	0.46405405	4.19563944	1.602951
75	0.43925729	9.03035550	3.96664948		75.00000000	0.45786667	4.13469877	1.624307
76	0.44950020	9.03383830	4.06071212		76.00000000	0.45184211	4.08186852	1.645689
77	0.45958012	9.01666640	4.14388063		77.00000000	0.44597403	4.02119902	1.667162
78	0.46939209	9.02415560	4.23586726		78.00000000	0.44025641	3.97294235	1.688538
79	0.47955909	9.00470450	4.31828790		79.00000000	0.43468354	3.91419687	1.709893
80	0.48935321	8.99539380	4.40192483		80.00000000	0.42925000	3.86127279	1.731269
81	0.49950978	8.98111920	4.48615688		81.00000000	0.42395062	3.80755103	1.752746
82	0.50931060	8.95815090	4.56248121		82.00000000	0.41878049	3.75149880	1.774140
83	0.51945227	8.92786500	4.63759974		83.00000000	0.41373494	3.69376969	1.795499
84	0.52922112	8.88881020	4.70414609		84.00000000	0.40880952	3.63383027	1.816882
85	0.53945881	8.84409430	4.77102459		85.00000000	0.40400000	3.57301410	1.838356
86	0.54948664	8.75747590	4.81211601		86.00000000	0.39930233	3.49688049	1.859732
87	0.55933505	8.66847320	4.84858089		87.00000000	0.39471264	3.42155597	1.881091
88	0.56946260	8.50672530	4.84426191		88.00000000	0.39022727	3.31955621	1.902473
89	0.57925075	8.32583050	4.82274356		89.00000000	0.38584270	3.21246089	1.923953
90	0.58943713	8.05762390	4.74946271		90.00000000	0.38155556	3.07443116	1.945331
91	0.59922004	7.69891310	4.61334302		91.00000000	0.37736264	2.90528215	1.966682
92	0.60931635	7.21063660	4.39355877		92.00000000	0.37326087	2.69144849	1.988168
93	0.61913800	6.56638570	4.06549891		93.00000000	0.36924731	2.42462027	2.009668
94	0.62923282	5.72242980	3.60074064		94.00000000	0.36531915	2.09051318	2.031036
95	0.63940275	4.62722970	2.95866340		95.00000000	0.36147368	1.67262177	2.052391
96	0.64913434	3.28800730	2.13435845		96.00000000	0.35770833	1.17614761	2.073759
97	0.65925896	1.57296030	1.03698817		97.00000000	0.35402062	0.55686038	2.095372
98	0.66900617	-0.43764308	-0.29278592		98.00000000	0.35040816	-0.15335371	2.116792
99	0.67908084	-2.90805910	-1.97480722		99.00000000	0.34686869	-1.00871464	2.138185
100	0.68879610	-5.75753020	-3.96576435		100.00000000	0.34340000	-1.97713587	2.159531
101	0.69911116	-9.21500870	-6.44231542		101.00000000	0.34000000	-3.13310296	2.180997
