# Supplementary material for: Study on the Electrical Injection Regeneration of Industrialized B-Doped Czochralski Silicon PERC Solar Cells
Source: Hindawi journal article supplement (doi:10.1155/2019/5357370), 2019-06-20
Supplement: f1 [file 5357370.f1.zip › section3.2/IVRawData_1-30-10min.csv]

13:23 02/04/2018
Test Lot:	JK-PERC
Recipe:	Recipe_YJX-LID
Cell Name:	1-30-10min
Test Order:	2
Test Condition:	Light
1	-0.29989937	9.01989940	-2.70506215		1.00000000	34.34000000	309.74334540	0.000000
2	-0.29012224	9.02521990	-2.61841701		2.00000000	17.17000000	154.96302568	0.061803
3	-0.27996176	9.02465920	-2.52655947		3.00000000	11.44666667	103.30226564	0.083227
4	-0.27012360	9.02191160	-2.43703124		4.00000000	8.58500000	77.45311109	0.104598
5	-0.26000407	9.02587700	-2.34676476		5.00000000	6.86800000	61.98972324	0.126088
6	-0.24985032	9.02486230	-2.25486473		6.00000000	5.72333333	51.65229523	0.147463
7	-0.24001661	9.02538010	-2.16624114		7.00000000	4.90571429	44.27593609	0.168849
8	-0.22993356	9.03753760	-2.07803319		8.00000000	4.29250000	38.79363015	0.190261
9	-0.22006039	9.03062150	-1.98728209		9.00000000	3.81555556	34.45683803	0.211730
10	-0.20993119	9.01089100	-1.89166707		10.00000000	3.43400000	30.94339969	0.233102
11	-0.20010270	9.03627590	-1.80818321		11.00000000	3.12181818	28.20961040	0.254469
12	-0.18994968	9.02020650	-1.71338534		12.00000000	2.86166667	25.81282427	0.275840
13	-0.18018296	9.02002140	-1.62525416		13.00000000	2.64153846	23.82673345	0.297328
14	-0.17002846	9.02553650	-1.53459807		14.00000000	2.45285714	22.13835167	0.318708
15	-0.16021633	9.03387450	-1.44737422		15.00000000	2.28933333	20.68155002	0.340124
16	-0.15007672	9.01929000	-1.35358546		16.00000000	2.14625000	19.35765116	0.361497
17	-0.13990360	9.01149850	-1.26074108		17.00000000	2.02000000	18.20322697	0.382973
18	-0.13007733	9.04498580	-1.17654760		18.00000000	1.90777778	17.25582291	0.404358
19	-0.11995707	9.01711080	-1.08166619		19.00000000	1.80736842	16.29724131	0.425739
20	-0.11014867	9.02202030	-0.99376354		20.00000000	1.71700000	15.49080886	0.447083
21	-0.09997109	9.03142640	-0.90288151		21.00000000	1.63523810	14.76853250	0.468559
22	-0.09014929	9.02309700	-0.81342580		22.00000000	1.56090909	14.08423414	0.489938
23	-0.07998883	9.02766130	-0.72211207		23.00000000	1.49304348	13.47869083	0.511335
24	-0.07015512	9.02025130	-0.63281682		24.00000000	1.43083333	12.90647624	0.532808
25	-0.06001252	9.03031160	-0.54193178		25.00000000	1.37360000	12.40403601	0.554191
26	-0.04987067	9.02362250	-0.45001414		26.00000000	1.32076923	11.91812295	0.575543
27	-0.04002506	9.02242280	-0.36112297		27.00000000	1.27185185	11.47518515	0.596914
28	-0.02988395	9.01969050	-0.26954397		28.00000000	1.22642857	11.06200613	0.618405
29	-0.02009341	9.02229880	-0.18128872		29.00000000	1.18413793	10.68364623	0.639793
30	-0.00992104	9.02605060	-0.08954782		30.00000000	1.14466667	10.33181925	0.661132
31	-0.00065895	9.02761460	-0.00594879		31.00000000	1.10774194	10.00026727	0.682626
32	0.00947971	9.02764420	0.08557946		32.00000000	1.07312500	9.68779068	0.704115
33	0.01925285	9.01552680	0.17357461		33.00000000	1.04060606	9.38161183	0.725491
34	0.02945247	9.03886410	0.26621686		34.00000000	1.01000000	9.12925274	0.746836
35	0.03925241	9.02883630	0.35440357		35.00000000	0.98114286	8.85857824	0.768236
36	0.04941109	9.02784630	0.44607571		36.00000000	0.95388889	8.61156228	0.789714
37	0.05921772	9.01191040	0.53366480		37.00000000	0.92810811	8.36402711	0.811106
38	0.06940022	9.03203390	0.62682515		38.00000000	0.90368421	8.16210642	0.832454
39	0.07953806	9.02373790	0.71773062		39.00000000	0.88051282	7.94551691	0.853825
40	0.08933279	9.01762290	0.80556940		40.00000000	0.85850000	7.74162926	0.875295
41	0.09950636	9.02526660	0.89807139		41.00000000	0.83756098	7.55921110	0.896669
42	0.10925344	9.01890660	0.98534657		42.00000000	0.81761905	7.37402982	0.918017
43	0.11945976	9.02501110	1.07812566		43.00000000	0.79860465	7.20741584	0.939395
44	0.12927458	9.01845930	1.16585754		44.00000000	0.78045455	7.03849755	0.960881
45	0.13943326	9.01507280	1.25700099		45.00000000	0.76311111	6.87950222	0.982265
46	0.14921534	9.02565860	1.34676672		46.00000000	0.74652174	6.73785035	1.003642
47	0.15939710	9.01166340	1.43643301		47.00000000	0.73063830	6.58426641	1.025007
48	0.16952674	9.02862260	1.53059296		48.00000000	0.71541667	6.45922709	1.046494
49	0.17931998	9.01430510	1.61644501		49.00000000	0.70081633	6.31737219	1.067884
50	0.18948536	9.02208710	1.70955342		50.00000000	0.68680000	6.19636942	1.089299
51	0.19927265	9.03516960	1.80046219		51.00000000	0.67333333	6.08368086	1.110658
52	0.20943281	9.00886150	1.88675118		52.00000000	0.66038462	5.94931354	1.132141
53	0.21924615	9.03024960	1.97984746		53.00000000	0.64792453	5.85092021	1.153519
54	0.22937059	9.01807690	2.06848162		54.00000000	0.63592593	5.73482890	1.174909
55	0.23920700	9.01953220	2.15753524		55.00000000	0.62436364	5.63146792	1.196393
56	0.24938279	9.03147320	2.25229398		56.00000000	0.61321429	5.53822839	1.217765
57	0.25954595	9.01155190	2.33891180		57.00000000	0.60245614	5.42906478	1.239114
58	0.26936150	9.02647970	2.43138611		58.00000000	0.59206897	5.34429850	1.260504
59	0.27948520	9.00664520	2.51722404		59.00000000	0.58203390	5.24217282	1.281988
60	0.28930151	9.03152940	2.61283509		60.00000000	0.57233333	5.16904533	1.303399
61	0.29945871	9.01433180	2.69942017		61.00000000	0.56295082	5.07462548	1.324750
62	0.30929735	9.01369290	2.78791133		62.00000000	0.55387097	4.99242281	1.346119
63	0.31943667	9.03251740	2.88531728		63.00000000	0.54507937	4.92343885	1.367608
64	0.32925150	9.01698400	2.96885551		64.00000000	0.53656250	4.83817548	1.388979
65	0.33938116	9.02768610	3.06382658		65.00000000	0.52830769	4.76939601	1.410332
66	0.34922871	9.01997280	3.15003347		66.00000000	0.52030303	4.69311918	1.431711
67	0.35936508	9.03119750	3.24549701		67.00000000	0.51253731	4.62882570	1.453195
68	0.36953118	9.02046870	3.33334444		68.00000000	0.50500000	4.55533669	1.474585
69	0.37935868	9.01895810	3.42142004		69.00000000	0.49768116	4.48856552	1.495932
70	0.38948983	9.01787190	3.51236939		70.00000000	0.49057143	4.42391030	1.517309
71	0.39932102	9.01751800	3.60088449		71.00000000	0.48366197	4.36143054	1.538794
72	0.40945810	9.00398830	3.68675594		72.00000000	0.47694444	4.29440220	1.560166
73	0.41928187	9.02969550	3.78598761		73.00000000	0.47041096	4.24766772	1.581508
74	0.42942938	9.01417540	3.87095175		74.00000000	0.46405405	4.18306464	1.602879
75	0.43923452	9.01024820	3.95761204		75.00000000	0.45786667	4.12549231	1.624355
76	0.44936419	9.00849440	4.04809479		76.00000000	0.45184211	4.07041707	1.645722
77	0.45951691	9.01196580	4.14115068		77.00000000	0.44597403	4.01910267	1.667104
78	0.46936521	9.00462630	4.22645831		78.00000000	0.44025641	3.96434445	1.688470
79	0.47952688	8.99651530	4.31407091		79.00000000	0.43468354	3.91063716	1.709947
80	0.48934618	8.98135570	4.39499210		80.00000000	0.42925000	3.85524693	1.731334
81	0.49946541	8.97598840	4.48319573		81.00000000	0.42395062	3.80537582	1.752721
82	0.50932044	8.96334170	4.56521314		82.00000000	0.41878049	3.75367261	1.774085
83	0.51944190	8.91858960	4.63268913		83.00000000	0.41373494	3.68993213	1.795602
84	0.52920830	8.90176110	4.71088586		84.00000000	0.40880952	3.63912472	1.816984
85	0.53936625	8.83945750	4.76770504		85.00000000	0.40400000	3.57114083	1.838409
86	0.54949445	8.76416400	4.81585948		86.00000000	0.39930233	3.49955107	1.859896
87	0.55932415	8.65012070	4.83822141		87.00000000	0.39471264	3.41431201	1.881282
88	0.56947464	8.50152590	4.84140340		88.00000000	0.39022727	3.31752727	1.902647
89	0.57924253	8.28995130	4.80189236		89.00000000	0.38584270	3.19861716	1.924031
90	0.58942211	8.00067520	4.71577486		90.00000000	0.38155556	3.05270207	1.945526
91	0.59920561	7.61484770	4.56285946		91.00000000	0.37736264	2.87355901	1.966911
92	0.60933083	7.09650330	4.32411825		92.00000000	0.37326087	2.64884699	1.988375
93	0.61911064	6.44110060	3.98775391		93.00000000	0.36924731	2.37835908	2.009824
94	0.62922096	5.52394340	3.47578097		94.00000000	0.36531915	2.01800230	2.031346
95	0.63932830	4.42815590	2.83104538		95.00000000	0.36147368	1.60066183	2.052729
96	0.64912528	3.07735420	1.99758841		96.00000000	0.35770833	1.10079524	2.074089
97	0.65925711	1.36126690	0.89742488		97.00000000	0.35402062	0.48191655	2.095495
98	0.66897964	-0.62262601	-0.41652412		98.00000000	0.35040816	-0.21817324	2.116970
99	0.67906320	-3.05775740	-2.07641052		99.00000000	0.34686869	-1.06064029	2.138370
100	0.68876266	-5.86488960	-4.03951696		100.00000000	0.34340000	-2.01400309	2.159712
101	0.69904709	-9.25543310	-6.46998358		101.00000000	0.34000000	-3.14684725	2.181087
13:24 02/04/2018
Test Lot:	JK-PERC
Recipe:	Recipe_YJX-LID
Cell Name:	1-30-10min
Test Order:	3
Test Condition:	Light
1	-0.29994699	9.01271150	-2.70333569		1.00000000	34.34000000	309.49651291	0.000000
2	-0.29009694	9.02943990	-2.61941288		2.00000000	17.17000000	155.03548308	0.021573
3	-0.27994987	9.02254100	-2.52585918		3.00000000	11.44666667	103.27801931	0.042958
4	-0.27014816	9.02054690	-2.43688415		4.00000000	8.58500000	77.44139514	0.064326
5	-0.25999960	9.01490970	-2.34387292		5.00000000	6.86800000	61.91439982	0.085699
6	-0.24988307	9.02198700	-2.25444181		6.00000000	5.72333333	51.63583893	0.107182
7	-0.24004340	9.02166460	-2.16559104		7.00000000	4.90571429	44.25770891	0.128566
8	-0.22994696	9.00492480	-2.07065508		8.00000000	4.29250000	38.65363970	0.149916
9	-0.22007081	9.02494620	-1.98612722		9.00000000	3.81555556	34.43518361	0.171296
10	-0.20994014	9.01739120	-1.89311237		10.00000000	3.43400000	30.96572138	0.192780
11	-0.20009972	9.02769280	-1.80643880		11.00000000	3.12181818	28.18281552	0.214307
12	-0.18996903	9.01727580	-1.71300314		12.00000000	2.86166667	25.80443758	0.235719
13	-0.18019487	9.01748470	-1.62490448		13.00000000	2.64153846	23.82003266	0.257101
14	-0.17003217	9.01803020	-1.53335524		14.00000000	2.45285714	22.11993979	0.278582
15	-0.16024163	9.03194520	-1.44729362		15.00000000	2.28933333	20.67713321	0.300007
16	-0.15007523	9.03150460	-1.35540513		16.00000000	2.14625000	19.38386675	0.321375
17	-0.13994379	9.01082040	-1.26100836		17.00000000	2.02000000	18.20185721	0.342735
18	-0.13008998	9.02517990	-1.17408547		18.00000000	1.90777778	17.21803765	0.364222
19	-0.11995335	9.02184680	-1.08220075		19.00000000	1.80736842	16.30580101	0.385605
20	-0.11012783	9.02492430	-0.99389533		20.00000000	1.71700000	15.49579502	0.406992
21	-0.09996439	9.01568890	-0.90124782		21.00000000	1.63523810	14.74279794	0.428341
22	-0.09015599	9.02190490	-0.81337876		22.00000000	1.56090909	14.08237338	0.449811
23	-0.08001041	9.01095580	-0.72097030		23.00000000	1.49304348	13.45374879	0.471193
24	-0.07016182	9.03431990	-0.63386432		24.00000000	1.43083333	12.92660606	0.492578
25	-0.06003337	9.00720600	-0.54073289		25.00000000	1.37360000	12.37229816	0.514075
26	-0.04987067	9.02017310	-0.44984211		26.00000000	1.32076923	11.91356709	0.535452
27	-0.04005334	9.01936720	-0.36125576		27.00000000	1.27185185	11.47129888	0.556811
28	-0.02990330	9.02519320	-0.26988306		28.00000000	1.22642857	11.06875480	0.578189
29	-0.02006215	9.02182480	-0.18099719		29.00000000	1.18413793	10.68308495	0.599675
30	-0.00994039	9.02408980	-0.08970300		30.00000000	1.14466667	10.32957479	0.621058
31	-0.00063737	9.01411150	-0.00574533		31.00000000	1.10774194	9.98530932	0.642527
32	0.00946185	9.02178190	0.08536273		32.00000000	1.07312500	9.68149970	0.663906
33	0.01930793	9.02414320	0.17423753		33.00000000	1.04060606	9.39057811	0.685391
34	0.02942493	9.01281830	0.26520157		34.00000000	1.01000000	9.10294648	0.706755
35	0.03926357	9.02132130	0.35420931		35.00000000	0.98114286	8.85120496	0.728114
36	0.04940960	9.01520630	0.44543772		36.00000000	0.95388889	8.59950512	0.749479
37	0.05924080	9.03234580	0.53508335		37.00000000	0.92810811	8.38299337	0.770969
38	0.06938757	9.02027990	0.62589530		38.00000000	0.90368421	8.15148452	0.792356
39	0.07951201	9.01501660	0.71680207		39.00000000	0.88051282	7.93783769	0.813707
40	0.08933576	9.04026790	0.80761922		40.00000000	0.85850000	7.76106999	0.835084
41	0.09943043	9.00533010	0.89540388		41.00000000	0.83756098	7.54251306	0.856570
42	0.10928471	9.02842040	0.98666831		42.00000000	0.81761905	7.38180849	0.877959
43	0.11941733	9.01961040	1.07709779		43.00000000	0.79860465	7.20310282	0.899313
44	0.12927830	9.01801870	1.16583413		44.00000000	0.78045455	7.03815369	0.920694
45	0.13939977	9.01203250	1.25627526		45.00000000	0.76311111	6.87718213	0.942168
46	0.14922129	9.02550320	1.34679723		46.00000000	0.74652174	6.73773435	0.963558
47	0.15937029	9.01079370	1.43605281		47.00000000	0.73063830	6.58363097	0.984923
48	0.16951483	9.02855400	1.53047380		48.00000000	0.71541667	6.45917801	1.006281
49	0.17934082	9.01267810	1.61634108		49.00000000	0.70081633	6.31623196	1.027765
50	0.18950546	9.02179530	1.70967947		50.00000000	0.68680000	6.19616901	1.049177
51	0.19928008	9.02146630	1.79779853		51.00000000	0.67333333	6.07445398	1.070561
52	0.20943132	9.01628970	1.88829345		52.00000000	0.66038462	5.95421901	1.091918
53	0.21925582	9.00962260	1.97541219		53.00000000	0.64792453	5.83755547	1.113392
54	0.22937952	9.02812670	2.07086737		54.00000000	0.63592593	5.74121983	1.134781
55	0.23922932	9.01876260	2.15755244		55.00000000	0.62436364	5.63098741	1.156209
56	0.24940141	9.02888770	2.25181732		56.00000000	0.61321429	5.53664292	1.177683
57	0.25952435	9.00791840	2.33777417		57.00000000	0.60245614	5.42687575	1.199073
58	0.26935557	9.03480530	2.43357513		58.00000000	0.59206897	5.34922783	1.220420
59	0.27951199	9.01938720	2.52102686		59.00000000	0.58203390	5.24958909	1.241797
60	0.28929183	9.02153110	2.60985524		60.00000000	0.57233333	5.16332297	1.263293
61	0.29947433	9.01991270	2.70123231		61.00000000	0.56295082	5.07776725	1.284666
62	0.30929810	9.02257250	2.79066453		62.00000000	0.55387097	4.99734096	1.306011
63	0.31943667	9.02026650	2.88140389		63.00000000	0.54507937	4.91676114	1.327388
64	0.32926935	9.02657510	2.97217452		64.00000000	0.53656250	4.84332170	1.348870
65	0.33937892	9.01622580	3.05991697		65.00000000	0.52830769	4.76334145	1.370247
66	0.34921756	9.00962920	3.14632073		66.00000000	0.52030303	4.68773737	1.391612
67	0.35938069	9.01764770	3.24076845		67.00000000	0.51253731	4.62188093	1.412991
68	0.36949623	9.02567010	3.33495108		68.00000000	0.50500000	4.55796340	1.434468
69	0.37932369	9.01836400	3.42087911		69.00000000	0.49768116	4.48826985	1.455857
70	0.38949278	9.01395990	3.51087230		70.00000000	0.49057143	4.42199119	1.477208
71	0.39932251	9.01883980	3.60142575		71.00000000	0.48366197	4.36206984	1.498576
72	0.40941867	9.01342770	3.69026558		72.00000000	0.47694444	4.29890427	1.520061
73	0.41926399	9.02374460	3.78333117		73.00000000	0.47041096	4.24486835	1.541426
74	0.42941821	8.99970250	3.86463614		74.00000000	0.46405405	4.17634843	1.562785
75	0.43924645	9.01616760	3.96031961		75.00000000	0.45786667	4.12820261	1.584168
76	0.44937533	9.00368310	4.04603306		76.00000000	0.45184211	4.06824313	1.605641
77	0.45953998	9.01530360	4.14289244		77.00000000	0.44597403	4.02059124	1.627041
78	0.46936074	8.99483780	4.22182373		78.00000000	0.44025641	3.96003500	1.648407
79	0.47950158	9.00180910	4.31638169		79.00000000	0.43468354	3.91293828	1.669767
80	0.48934171	8.98079300	4.39467660		80.00000000	0.42925000	3.85500540	1.691238
81	0.49947357	8.97502230	4.48278643		81.00000000	0.42395062	3.80496624	1.712612
82	0.50925863	8.94579220	4.55572188		82.00000000	0.41878049	3.74632322	1.733997
83	0.51944780	8.91868970	4.63279374		83.00000000	0.41373494	3.68997355	1.755354
84	0.52922839	8.88757900	4.70355913		84.00000000	0.40880952	3.63332694	1.776831
85	0.53935432	8.83826260	4.76695511		85.00000000	0.40400000	3.57065809	1.798257
86	0.54952347	8.74924560	4.80791580		86.00000000	0.39930233	3.49359412	1.819655
87	0.55932117	8.63911820	4.83204170		87.00000000	0.39471264	3.40996918	1.841145
88	0.56946868	8.47709660	4.82744101		88.00000000	0.39022727	3.30799429	1.862538
89	0.57928646	8.28060910	4.79684473		89.00000000	0.38584270	3.19501254	1.883897
90	0.58935434	7.97554210	4.70042035		90.00000000	0.38155556	3.04311240	1.905270
91	0.59919149	7.57121710	4.53660886		91.00000000	0.37736264	2.85709445	1.926747
92	0.60931075	7.05032680	4.29583991		92.00000000	0.37326087	2.63161111	1.948125
93	0.61911887	6.37515400	3.94697814		93.00000000	0.36924731	2.35400848	1.969471
94	0.62921798	5.49046520	3.45469942		94.00000000	0.36531915	2.00577207	1.990948
95	0.63931417	4.35979030	2.78727572		95.00000000	0.36147368	1.57594946	2.012452
96	0.64909548	3.02755260	1.96517071		96.00000000	0.35770833	1.08298079	2.033836
97	0.65922290	1.32317300	0.87226594		97.00000000	0.35402062	0.46843052	2.055193
98	0.66894919	-0.61574090	-0.41189938		98.00000000	0.35040816	-0.21576064	2.076568
99	0.67902672	-3.00766130	-2.04228239		99.00000000	0.34686869	-1.04326353	2.098046
100	0.68877453	-5.72447540	-3.94287285		100.00000000	0.34340000	-1.96578485	2.119424
101	0.69901884	-8.99773880	-6.28958894		101.00000000	0.34000000	-3.05923119	2.140780
13:24 02/04/2018
Test Lot:	JK-PERC
Recipe:	Recipe_YJX-LID
Cell Name:	1-30-10min
Test Order:	4
Test Condition:	Light
1	-0.29992443	9.02080250	-2.70555905		1.00000000	34.34000000	309.77435785	0.000000
2	-0.29007605	9.01569270	-2.61523653		2.00000000	17.17000000	154.79944366	0.061780
3	-0.27998057	9.03138640	-2.52861271		3.00000000	11.44666667	103.37926966	0.083213
4	-0.27014259	9.01859470	-2.43630653		4.00000000	8.58500000	77.42463550	0.104705
5	-0.26000020	9.02630330	-2.34684066		5.00000000	6.86800000	61.99265106	0.126141
6	-0.24984962	9.02083110	-2.25385122		6.00000000	5.72333333	51.62922333	0.147515
7	-0.23998784	9.01999470	-2.16468904		7.00000000	4.90571429	44.24951686	0.168907
8	-0.22984469	9.01820370	-2.07278623		8.00000000	4.29250000	38.71063938	0.190398
9	-0.22004022	9.03640170	-1.98837182		9.00000000	3.81555556	34.47889271	0.211775
10	-0.20988220	9.00956060	-1.89094640		10.00000000	3.43400000	30.93883110	0.233121
11	-0.20003752	9.02115440	-1.80456935		11.00000000	3.12181818	28.16240383	0.254525
12	-0.18991746	9.02098940	-1.71324339		12.00000000	2.86166667	25.81506467	0.276010
13	-0.18015690	9.01567550	-1.62423615		13.00000000	2.64153846	23.81525359	0.297394
14	-0.16994677	9.01714130	-1.53243404		14.00000000	2.45285714	22.11775945	0.318740
15	-0.16016984	9.03061580	-1.44643229		15.00000000	2.28933333	20.67408977	0.340113
16	-0.15001777	9.01863770	-1.35295592		16.00000000	2.14625000	19.35625116	0.361592
17	-0.13985975	9.02134510	-1.26172307		17.00000000	2.02000000	18.22311710	0.382988
18	-0.13002923	9.01883320	-1.17271194		18.00000000	1.90777778	17.20592956	0.404348
19	-0.11989949	9.02713390	-1.08234875		19.00000000	1.80736842	16.31535674	0.425715
20	-0.11007268	9.01803680	-0.99263948		20.00000000	1.71700000	15.48396919	0.447197
21	-0.09989606	9.02735140	-0.90179682		21.00000000	1.63523810	14.76186891	0.468606
22	-0.09010274	9.01234820	-0.81203727		22.00000000	1.56090909	14.06745624	0.489993
23	-0.07993653	9.01982590	-0.72101362		23.00000000	1.49304348	13.46699224	0.511357
24	-0.07013875	9.02576260	-0.63305572		24.00000000	1.43083333	12.91436199	0.532832
25	-0.05995915	9.01705460	-0.54065494		25.00000000	1.37360000	12.38582620	0.554210
26	-0.04981528	9.03123000	-0.44989321		26.00000000	1.32076923	11.92817070	0.575601
27	-0.04001005	9.02315040	-0.36101670		27.00000000	1.27185185	11.47611055	0.597082
28	-0.02987808	9.03282360	-0.26988344		28.00000000	1.22642857	11.07811294	0.618476
29	-0.02005276	9.01069740	-0.18068936		29.00000000	1.18413793	10.66990858	0.639822
30	-0.00995205	9.03336240	-0.08990050		30.00000000	1.14466667	10.34018883	0.661208
31	-0.00068048	9.02303220	-0.00614000		31.00000000	1.10774194	9.99519115	0.682818
32	0.00949966	9.02589420	0.08574290		32.00000000	1.07312500	9.68591271	0.704193
33	0.01929939	9.01601120	0.17400355		33.00000000	1.04060606	9.38211590	0.725534
34	0.02942586	9.01747130	0.26534688		34.00000000	1.01000000	9.10764601	0.746914
35	0.03927546	9.01781650	0.35417893		35.00000000	0.98114286	8.84776625	0.768397
36	0.04943394	9.02094460	0.44594079		36.00000000	0.95388889	8.60497882	0.789781
37	0.05925228	9.02770520	0.53491213		37.00000000	0.92810811	8.37868639	0.811136
38	0.06940927	9.02556230	0.62645765		38.00000000	0.90368421	8.15625814	0.832507
39	0.07951862	9.02050020	0.71729769		39.00000000	0.88051282	7.94266607	0.853985
40	0.08934738	9.02418230	0.80628702		40.00000000	0.85850000	7.74726050	0.875364
41	0.09950585	9.03261470	0.89879799		41.00000000	0.83756098	7.56536558	0.896709
42	0.10933610	9.00906370	0.98501589		42.00000000	0.81761905	7.36598208	0.918094
43	0.11947894	9.02075390	1.07779011		43.00000000	0.79860465	7.20401602	0.939579
44	0.12931068	9.02283860	1.16674939		44.00000000	0.78045455	7.04191540	0.960941
45	0.13949372	9.02127650	1.25841142		45.00000000	0.76311111	6.88423633	0.982295
46	0.14926368	9.02882480	1.34767562		46.00000000	0.74652174	6.74021399	1.003666
47	0.15943481	9.01460740	1.43724222		47.00000000	0.73063830	6.58641741	1.025141
48	0.16959625	9.02809050	1.53113029		48.00000000	0.71541667	6.45884641	1.046523
49	0.17940418	9.02168370	1.61852777		49.00000000	0.70081633	6.32254323	1.067884
50	0.18953288	9.01914500	1.70942453		50.00000000	0.68680000	6.19434879	1.089245
51	0.19930582	9.01967910	1.79767454		51.00000000	0.67333333	6.07325059	1.110712
52	0.20948513	9.02639960	1.89089649		52.00000000	0.66038462	5.96089543	1.132079
53	0.21930720	9.01485440	1.97702248		53.00000000	0.64792453	5.84094528	1.153456
54	0.22944185	9.02015970	2.06960213		54.00000000	0.63592593	5.73615341	1.174824
55	0.23928252	9.01342110	2.15675411		55.00000000	0.62436364	5.62765237	1.196304
56	0.24943058	9.02506830	2.25112802		56.00000000	0.61321429	5.53430081	1.217725
57	0.25954887	9.01678560	2.34029651		57.00000000	0.60245614	5.43221785	1.239118
58	0.26937687	9.02124500	2.43011474		58.00000000	0.59206897	5.34119919	1.260612
59	0.27953163	9.01551250	2.52012090		59.00000000	0.58203390	5.24733389	1.282013
60	0.28931424	9.02363490	2.61066607		60.00000000	0.57233333	5.16452704	1.303371
61	0.29946080	9.02173520	2.70165604		61.00000000	0.56295082	5.07879323	1.324751
62	0.30930519	9.01566890	2.78859318		62.00000000	0.55387097	4.99351726	1.346235
63	0.31943464	9.01436420	2.87950018		63.00000000	0.54507937	4.91354391	1.367611
64	0.32926342	9.01933860	2.96973827		64.00000000	0.53656250	4.83943887	1.388960
65	0.33943304	9.01532550	3.06009934		65.00000000	0.52830769	4.76286581	1.410347
66	0.34920079	9.01744460	3.14889878		66.00000000	0.52030303	4.69180375	1.431832
67	0.35938308	9.02111430	3.24203584		67.00000000	0.51253731	4.62365769	1.453210
68	0.36955345	9.00325780	3.32718498		68.00000000	0.50500000	4.54664519	1.474580
69	0.37935469	9.01650710	3.42045426		69.00000000	0.49768116	4.48734571	1.495954
70	0.38951239	9.01038170	3.50965531		70.00000000	0.49057143	4.42023582	1.517427
71	0.39934936	9.01498320	3.60012777		71.00000000	0.48366197	4.36020455	1.538801
72	0.40949443	9.01308250	3.69080708		72.00000000	0.47694444	4.29873963	1.560141
73	0.41926512	9.01805210	3.78095470		73.00000000	0.47041096	4.24219054	1.581525
74	0.42944518	9.00954910	3.86910743		74.00000000	0.46405405	4.18091779	1.603010
75	0.43924418	9.02101610	3.96242882		75.00000000	0.45786667	4.13042257	1.624406
76	0.44940490	9.00591090	4.04730049		76.00000000	0.45184211	4.06924974	1.645766
77	0.45954102	9.01576900	4.14311568		77.00000000	0.44597403	4.02079880	1.667147
78	0.46944645	9.00429530	4.22703446		78.00000000	0.44025641	3.96419873	1.688623
79	0.47956249	9.00092320	4.31650514		79.00000000	0.43468354	3.91255320	1.710017
80	0.48939648	8.97575470	4.39270276		80.00000000	0.42925000	3.85284270	1.731384
81	0.49948499	8.98186780	4.48630815		81.00000000	0.42395062	3.80786840	1.752737
82	0.50934500	8.94160560	4.55436210		82.00000000	0.41878049	3.74456995	1.774232
83	0.51945436	8.92950820	4.63847197		83.00000000	0.41373494	3.69444954	1.795615
84	0.52923626	8.88412280	4.70179992		84.00000000	0.40880952	3.63191401	1.817007
85	0.53941184	8.83618260	4.76634151		85.00000000	0.40400000	3.56981777	1.838351
86	0.54954201	8.75410180	4.81074670		86.00000000	0.39930233	3.49553321	1.859823
87	0.55932909	8.64471530	4.83524074		87.00000000	0.39471264	3.41217843	1.881224
88	0.56949872	8.48685260	4.83325169		88.00000000	0.39022727	3.31180134	1.902610
89	0.57931483	8.26936720	4.79056705		89.00000000	0.38584270	3.19067494	1.924088
90	0.58939886	7.97007890	4.69755542		90.00000000	0.38155556	3.04102788	1.945473
91	0.59924775	7.58685970	4.54640860		91.00000000	0.37736264	2.86299739	1.966860
92	0.60935116	7.04189730	4.29098829		92.00000000	0.37326087	2.62846471	1.988337
93	0.61911666	6.38170720	3.95102125		93.00000000	0.36924731	2.35642823	2.009838
94	0.62925875	5.48652270	3.45244242		94.00000000	0.36531915	2.00433180	2.031224
95	0.63935691	4.36168240	2.78867178		95.00000000	0.36147368	1.57663341	2.052574
96	0.64911497	3.02792360	1.96547054		96.00000000	0.35770833	1.08311350	2.073959
97	0.65925783	1.32300730	0.87220292		97.00000000	0.35402062	0.46837186	2.095445
98	0.66899282	-0.62922740	-0.42094861		98.00000000	0.35040816	-0.22048642	2.116806
99	0.67905456	-3.02037860	-2.05100186		99.00000000	0.34686869	-1.04767476	2.138208
100	0.68881929	-5.73810580	-3.95251796		100.00000000	0.34340000	-1.97046553	2.159588
101	0.69910055	-9.02052500	-6.30625399		101.00000000	0.34000000	-3.06697850	2.181073
