# Supplementary material for: Study on the Electrical Injection Regeneration of Industrialized B-Doped Czochralski Silicon PERC Solar Cells
Source: Hindawi journal article supplement (doi:10.1155/2019/5357370), 2019-06-20
Supplement: f1 [file 5357370.f1.zip › section3.2/IVRawData_1-30-20min.csv]

13:55 02/04/2018
Test Lot:	JK-PERC
Recipe:	Recipe_YJX-LID
Cell Name:	1-30-20min
Test Order:	2
Test Condition:	Light
1	-0.29989880	9.02449230	-2.70643441		1.00000000	34.34000000	309.90106558	0.000000
2	-0.29012635	9.03942870	-2.62257645		2.00000000	17.17000000	155.20699078	0.061804
3	-0.27998549	9.01277640	-2.52344662		3.00000000	11.44666667	103.16624719	0.083244
4	-0.27016243	9.03545280	-2.44103988		4.00000000	8.58500000	77.56936229	0.104740
5	-0.25999108	9.02260970	-2.34579804		5.00000000	6.86800000	61.96728342	0.126178
6	-0.24983755	9.02563190	-2.25494176		6.00000000	5.72333333	51.65669991	0.147537
7	-0.24002343	9.02734380	-2.16677402		7.00000000	4.90571429	44.28556944	0.168919
8	-0.22984758	9.03418830	-2.07648632		8.00000000	4.29250000	38.77925328	0.190410
9	-0.22002825	9.03440860	-1.98782511		9.00000000	3.81555556	34.47128792	0.211800
10	-0.20987622	9.03386590	-1.89599363		10.00000000	3.43400000	31.02229550	0.233165
11	-0.20004275	9.02621940	-1.80562975		11.00000000	3.12181818	28.17821584	0.254546
12	-0.18991677	9.02735710	-1.71444650		12.00000000	2.86166667	25.83328690	0.276031
13	-0.18013912	9.01115130	-1.62326087		13.00000000	2.64153846	23.80330274	0.297428
14	-0.17001314	9.03070830	-1.53533907		14.00000000	2.45285714	22.15103736	0.318784
15	-0.16014098	9.01825900	-1.44419283		15.00000000	2.28933333	20.64580094	0.340172
16	-0.15004700	9.03072550	-1.35503327		16.00000000	2.14625000	19.38219460	0.361671
17	-0.13985775	9.02270790	-1.26189563		17.00000000	2.02000000	18.22586996	0.383043
18	-0.13004588	9.02295680	-1.17339836		18.00000000	1.90777778	17.21379647	0.404456
19	-0.11988119	9.02435490	-1.08185040		19.00000000	1.80736842	16.31033407	0.425817
20	-0.11007004	9.01990220	-0.99282100		20.00000000	1.71700000	15.48717208	0.447317
21	-0.09993588	9.01556020	-0.90097796		21.00000000	1.63523810	14.74258749	0.468713
22	-0.09009199	9.04230400	-0.81463914		22.00000000	1.56090909	14.11421452	0.490095
23	-0.07994591	9.01596070	-0.72078922		23.00000000	1.49304348	13.46122132	0.511440
24	-0.07012361	9.03089520	-0.63327893		24.00000000	1.43083333	12.92170588	0.532913
25	-0.05998721	9.01925180	-0.54103975		25.00000000	1.37360000	12.38884427	0.554286
26	-0.04988803	9.03246880	-0.45061207		26.00000000	1.32076923	11.92980687	0.575667
27	-0.04005009	9.02169130	-0.36131954		27.00000000	1.27185185	11.47425479	0.597163
28	-0.02992411	9.03280930	-0.27029879		28.00000000	1.22642857	11.07809541	0.618542
29	-0.02006161	9.02713870	-0.18109895		29.00000000	1.18413793	10.68937734	0.639893
30	-0.00991182	9.02146430	-0.08941912		30.00000000	1.14466667	10.32656947	0.661284
31	-0.00067600	9.02075200	-0.00609807		31.00000000	1.10774194	9.99266528	0.682877
32	0.00949368	9.03448870	0.08577052		32.00000000	1.07312500	9.69513569	0.704278
33	0.01929487	9.01739790	0.17398949		33.00000000	1.04060606	9.38355891	0.725632
34	0.02945330	9.01300140	0.26546265		34.00000000	1.01000000	9.10313141	0.747005
35	0.03927310	9.03197000	0.35471344		35.00000000	0.98114286	8.86165285	0.768492
36	0.04942707	9.02280330	0.44597073		36.00000000	0.95388889	8.60675181	0.789868
37	0.05926547	9.03337380	0.53536716		37.00000000	0.92810811	8.38394747	0.811220
38	0.06938744	9.02257250	0.62605317		38.00000000	0.90368421	8.15355631	0.832604
39	0.07952727	9.01867390	0.71723048		39.00000000	0.88051282	7.94105799	0.854093
40	0.08935227	9.02766610	0.80664248		40.00000000	0.85850000	7.75025135	0.875478
41	0.09950550	9.03582670	0.89911444		41.00000000	0.83756098	7.56805583	0.896847
42	0.10932530	9.02202890	0.98633602		42.00000000	0.81761905	7.37658268	0.918234
43	0.11948819	9.01809880	1.07755630		43.00000000	0.79860465	7.20189565	0.939759
44	0.12929533	9.03383260	1.16803237		44.00000000	0.78045455	7.05049572	0.961158
45	0.13946271	9.02416320	1.25853426		45.00000000	0.76311111	6.88643921	0.982506
46	0.14928623	9.01178840	1.34533592		46.00000000	0.74652174	6.72749595	1.003897
47	0.15942754	9.02650640	1.43907371		47.00000000	0.73063830	6.59511127	1.025398
48	0.16957034	9.02396110	1.53019615		48.00000000	0.71541667	6.45589217	1.046779
49	0.17942810	9.02478410	1.61929986		49.00000000	0.70081633	6.32471604	1.068204
50	0.18954486	9.02073000	1.70983300		50.00000000	0.68680000	6.19543736	1.089567
51	0.19931702	9.02205180	1.79824848		51.00000000	0.67333333	6.07484821	1.111033
52	0.20946653	9.02558990	1.89055900		52.00000000	0.66038462	5.96036071	1.132434
53	0.21928558	9.02570340	1.97920660		53.00000000	0.64792453	5.84797462	1.153813
54	0.22941424	9.02377610	2.07018274		54.00000000	0.63592593	5.73845317	1.175163
55	0.23922957	9.02291010	2.15854690		55.00000000	0.62436364	5.63357696	1.196634
56	0.24937610	9.02361110	2.25027294		56.00000000	0.61321429	5.53340724	1.218017
57	0.25952262	9.02252100	2.34154829		57.00000000	0.60245614	5.43567318	1.239407
58	0.26934466	9.02926160	2.43198340		58.00000000	0.59206897	5.34594557	1.260895
59	0.27948299	9.01489260	2.51950914		59.00000000	0.58203390	5.24697308	1.282279
60	0.28930876	9.03317640	2.61337706		60.00000000	0.57233333	5.16998796	1.303649
61	0.29944709	9.02454190	2.70237281		61.00000000	0.56295082	5.08037326	1.325029
62	0.30925646	9.02491280	2.79101258		62.00000000	0.55387097	4.99863719	1.346509
63	0.31942531	9.03007600	2.88443483		63.00000000	0.54507937	4.92210809	1.367904
64	0.32924512	9.02040670	2.96992489		64.00000000	0.53656250	4.84001197	1.389264
65	0.33940578	9.03115270	3.06522543		65.00000000	0.52830769	4.77122744	1.410646
66	0.34919581	9.01557830	3.14820217		66.00000000	0.52030303	4.69083271	1.432142
67	0.35936391	9.03069880	3.24530723		67.00000000	0.51253731	4.62857010	1.453530
68	0.36954841	9.03272910	3.33803068		68.00000000	0.50500000	4.56152820	1.474867
69	0.37934068	9.02152820	3.42223264		69.00000000	0.49768116	4.48984461	1.496256
70	0.38951474	9.01681710	3.51218317		70.00000000	0.49057143	4.42339285	1.517740
71	0.39931294	9.03159620	3.60643323		71.00000000	0.48366197	4.36823963	1.539121
72	0.40946394	9.00126460	3.68569327		72.00000000	0.47694444	4.29310314	1.560481
73	0.41929266	9.02591230	3.78449878		73.00000000	0.47041096	4.24588806	1.581857
74	0.42946672	9.00755980	3.86844716		74.00000000	0.46405405	4.17999464	1.603370
75	0.43928578	9.00967410	3.95782171		75.00000000	0.45786667	4.12522945	1.624760
76	0.44943604	9.01335240	4.05092541		76.00000000	0.45184211	4.07261212	1.646111
77	0.45955354	9.00477410	4.13817581		77.00000000	0.44597403	4.01589536	1.667487
78	0.46941799	8.99668500	4.22320579		78.00000000	0.44025641	3.96084824	1.688963
79	0.47957864	8.99334240	4.31301492		79.00000000	0.43468354	3.90925795	1.710361
80	0.48937762	8.98301700	4.39608748		80.00000000	0.42925000	3.85596005	1.731738
81	0.49950776	8.96163080	4.47640413		81.00000000	0.42395062	3.79928891	1.753108
82	0.50933647	8.95191290	4.55953572		82.00000000	0.41878049	3.74888645	1.774580
83	0.51948524	8.92251680	4.63511578		83.00000000	0.41373494	3.69155695	1.795971
84	0.52924925	8.88497920	4.70236858		84.00000000	0.40880952	3.63226412	1.817357
85	0.53939056	8.83067230	4.76318128		85.00000000	0.40400000	3.56759161	1.838722
86	0.54950804	8.75273420	4.80969781		86.00000000	0.39930233	3.49498712	1.860215
87	0.55935091	8.65588760	4.84167861		87.00000000	0.39471264	3.41658828	1.881597
88	0.56949222	8.48453430	4.83187627		88.00000000	0.39022727	3.31089668	1.902980
89	0.57928818	8.28420160	4.79894007		89.00000000	0.38584270	3.19639868	1.924474
90	0.58940870	7.98290400	4.70519307		90.00000000	0.38155556	3.04592137	1.945846
91	0.59921879	7.61722040	4.56438159		91.00000000	0.37736264	2.87445438	1.967216
92	0.60933036	7.07047650	4.30825599		92.00000000	0.37326087	2.63913221	1.988698
93	0.61911148	6.41470430	3.97141707		93.00000000	0.36924731	2.36861232	2.010210
94	0.62921256	5.52530000	3.47658816		94.00000000	0.36531915	2.01849789	2.031606
95	0.63934052	4.40406890	2.81569970		95.00000000	0.36147368	1.59195501	2.052959
96	0.64911938	3.04864050	1.97893163		96.00000000	0.35770833	1.09052411	2.074338
97	0.65924209	1.32443080	0.87312053		97.00000000	0.35402062	0.46887581	2.095824
98	0.66895765	-0.67476261	-0.45138761		98.00000000	0.35040816	-0.23644233	2.117254
99	0.67902458	-3.12852310	-2.12434408		99.00000000	0.34686869	-1.08518670	2.138619
100	0.68877292	-5.96715550	-4.11001512		100.00000000	0.34340000	-2.04912120	2.160007
101	0.69907725	-9.40069290	-6.57181054		101.00000000	0.34000000	-3.19623559	2.181508
13:55 02/04/2018
Test Lot:	JK-PERC
Recipe:	Recipe_YJX-LID
Cell Name:	1-30-20min
Test Order:	3
Test Condition:	Light
1	-0.29993156	9.02589890	-2.70715194		1.00000000	34.34000000	309.94936823	0.000000
2	-0.29004672	9.01996900	-2.61621242		2.00000000	17.17000000	154.87286773	0.021598
3	-0.27996466	9.01818180	-2.52477220		3.00000000	11.44666667	103.22812100	0.043010
4	-0.27015427	9.03062530	-2.43966199		4.00000000	8.58500000	77.52791820	0.064363
5	-0.26001638	9.03285600	-2.34869052		5.00000000	6.86800000	62.03765501	0.085740
6	-0.24985988	9.02791980	-2.25571496		6.00000000	5.72333333	51.66979432	0.107221
7	-0.24007255	9.02399640	-2.16641383		7.00000000	4.90571429	44.26914805	0.128602
8	-0.22988406	9.02702050	-2.07516812		8.00000000	4.29250000	38.74848550	0.149998
9	-0.22005653	9.02789780	-1.98664786		9.00000000	3.81555556	34.44644561	0.171348
10	-0.20992461	9.02287480	-1.89412347		10.00000000	3.43400000	30.98455206	0.192832
11	-0.20009634	9.02082730	-1.80503453		11.00000000	3.12181818	28.16138268	0.214266
12	-0.18995400	9.02398780	-1.71414258		12.00000000	2.86166667	25.82364509	0.235650
13	-0.18014657	9.01972200	-1.62487198		13.00000000	2.64153846	23.82594258	0.257164
14	-0.17000645	9.01409820	-1.53245483		14.00000000	2.45285714	22.11029516	0.278621
15	-0.16018489	9.03899100	-1.44790978		15.00000000	2.28933333	20.69326340	0.300007
16	-0.15004998	9.00760460	-1.35159089		16.00000000	2.14625000	19.33257137	0.321391
17	-0.13988678	9.02833560	-1.26294480		17.00000000	2.02000000	18.23723791	0.342776
18	-0.13003843	9.01531310	-1.17233716		18.00000000	1.90777778	17.19921399	0.364272
19	-0.11988119	9.02901650	-1.08240924		19.00000000	1.80736842	16.31875930	0.385657
20	-0.11010875	9.01950840	-0.99312680		20.00000000	1.71700000	15.48649592	0.407063
21	-0.09993588	9.03106400	-0.90252735		21.00000000	1.63523810	14.76793989	0.428428
22	-0.09010092	9.01872060	-0.81259504		22.00000000	1.56090909	14.07740297	0.449899
23	-0.07999132	9.01722910	-0.72130004		23.00000000	1.49304348	13.46311510	0.471273
24	-0.07017050	9.02676490	-0.63341260		24.00000000	1.43083333	12.91579611	0.492648
25	-0.06000805	9.03254890	-0.54202564		25.00000000	1.37360000	12.40710917	0.514010
26	-0.04983444	9.01759150	-0.44938663		26.00000000	1.32076923	11.91015739	0.535486
27	-0.04003223	9.02430820	-0.36126315		27.00000000	1.27185185	11.47758310	0.556875
28	-0.02986159	9.02209570	-0.26941414		28.00000000	1.22642857	11.06495594	0.578263
29	-0.02006757	9.01668830	-0.18094300		29.00000000	1.18413793	10.67700263	0.599753
30	-0.00993936	9.02319720	-0.08968478		30.00000000	1.14466667	10.32855306	0.621123
31	-0.00064698	9.01733110	-0.00583401		31.00000000	1.10774194	9.98887581	0.642590
32	0.00949591	9.02762600	0.08572553		32.00000000	1.07312500	9.68777115	0.663971
33	0.01926659	9.02744580	0.17392805		33.00000000	1.04060606	9.39401481	0.685450
34	0.02946893	9.01085090	0.26554014		34.00000000	1.01000000	9.10095941	0.706847
35	0.03924705	9.02149110	0.35406692		35.00000000	0.98114286	8.85137155	0.728195
36	0.04940102	9.02050690	0.44562223		36.00000000	0.95388889	8.60456130	0.749578
37	0.05923347	9.02860550	0.53479561		37.00000000	0.92810811	8.37952197	0.771062
38	0.06935915	9.01946160	0.62558223		38.00000000	0.90368421	8.15074504	0.792443
39	0.07951611	9.03020100	0.71804641		39.00000000	0.88051282	7.95120775	0.813806
40	0.08934186	9.02286820	0.80611980		40.00000000	0.85850000	7.74613235	0.835178
41	0.09946755	9.02322670	0.89751822		41.00000000	0.83756098	7.55750256	0.856648
42	0.10926501	9.02302650	0.98590108		42.00000000	0.81761905	7.37739833	0.878027
43	0.11944354	9.01797010	1.07713827		43.00000000	0.79860465	7.20179287	0.899368
44	0.12926854	9.02299500	1.16638939		44.00000000	0.78045455	7.04203746	0.920740
45	0.13943443	9.03040980	1.25915004		45.00000000	0.76311111	6.89120606	0.942226
46	0.14924455	9.01683520	1.34571351		46.00000000	0.74652174	6.73126349	0.963611
47	0.15939182	9.01056670	1.43621063		47.00000000	0.73063830	6.58346512	0.984960
48	0.16950858	9.00055890	1.52567196		48.00000000	0.71541667	6.43914985	1.006340
49	0.17936930	9.02816490	1.61937562		49.00000000	0.70081633	6.32708536	1.027820
50	0.18952402	9.02529140	1.71050951		50.00000000	0.68680000	6.19857013	1.049216
51	0.19930288	9.01856900	1.79742678		51.00000000	0.67333333	6.07250313	1.070576
52	0.20945090	9.01831250	1.88889367		52.00000000	0.66038462	5.95555483	1.091936
53	0.21924241	9.01688190	1.97688292		53.00000000	0.64792453	5.84225895	1.113412
54	0.22942987	9.02144430	2.06978879		54.00000000	0.63592593	5.73697032	1.134788
55	0.23922139	9.01334190	2.15618418		55.00000000	0.62436364	5.62760292	1.156165
56	0.24937908	9.03229900	2.25246641		56.00000000	0.61321429	5.53873478	1.177529
57	0.25950775	9.01535130	2.33955353		57.00000000	0.60245614	5.43135375	1.199016
58	0.26934168	9.01246070	2.42743131		58.00000000	0.59206897	5.33599828	1.220384
59	0.27949193	9.01714040	2.52021797		59.00000000	0.58203390	5.24828138	1.241769
60	0.28934300	9.02785780	2.61214746		60.00000000	0.57233333	5.16694395	1.263250
61	0.29947314	9.02196690	2.70183676		61.00000000	0.56295082	5.07892366	1.284618
62	0.30927506	9.02398780	2.79089437		62.00000000	0.55387097	4.99812486	1.305986
63	0.31944096	9.01669030	2.88030021		63.00000000	0.54507937	4.91481182	1.327357
64	0.32926521	9.01320360	2.96773438		64.00000000	0.53656250	4.83614706	1.348898
65	0.33943853	9.02505590	3.06345171		65.00000000	0.52830769	4.76800646	1.370274
66	0.34922409	9.00790500	3.14577743		66.00000000	0.52030303	4.68684027	1.391613
67	0.35937509	9.01671500	3.24038276		67.00000000	0.51253731	4.62140288	1.412994
68	0.36948216	9.02173140	3.33336880		68.00000000	0.50500000	4.55597436	1.434487
69	0.37933174	9.02416130	3.42315081		69.00000000	0.49768116	4.49115506	1.455859
70	0.38948050	9.01439190	3.51092986		70.00000000	0.49057143	4.42220311	1.477218
71	0.39931294	9.02169320	3.60247884		71.00000000	0.48366197	4.36344992	1.498591
72	0.40947065	9.02569200	3.69575597		72.00000000	0.47694444	4.30475366	1.520071
73	0.41925916	9.00315860	3.77465671		73.00000000	0.47041096	4.23518447	1.541458
74	0.42942283	9.02618410	3.87604952		74.00000000	0.46405405	4.18863732	1.562806
75	0.43922773	9.00531290	3.95538314		75.00000000	0.45786667	4.12323260	1.584175
76	0.44942412	9.01417350	4.05118699		76.00000000	0.45184211	4.07298313	1.605653
77	0.45954236	9.00267510	4.13711056		77.00000000	0.44597403	4.01495926	1.627023
78	0.46940234	9.00296690	4.22601373		78.00000000	0.44025641	3.96361389	1.648363
79	0.47954592	8.99085040	4.31152563		79.00000000	0.43468354	3.90817472	1.669740
80	0.48933741	8.97421740	4.39142030		80.00000000	0.42925000	3.85218282	1.691213
81	0.49947280	8.97472950	4.48263327		81.00000000	0.42395062	3.80484211	1.712603
82	0.50930005	8.93959330	4.55293531		82.00000000	0.41878049	3.74372724	1.733963
83	0.51945400	8.92192270	4.63452843		83.00000000	0.41373494	3.69131115	1.755324
84	0.52921128	8.87670330	4.69765152		84.00000000	0.40880952	3.62888085	1.776791
85	0.53938311	8.82253460	4.75872615		85.00000000	0.40400000	3.56430398	1.798170
86	0.54952890	8.74734880	4.80692096		86.00000000	0.39930233	3.49283672	1.819552
87	0.55936205	8.64742660	4.83704227		87.00000000	0.39471264	3.41324861	1.840908
88	0.56948626	8.47927760	4.82883209		88.00000000	0.39022727	3.30884537	1.862375
89	0.57927334	8.27572150	4.79390483		89.00000000	0.38584270	3.19312670	1.883742
90	0.58944684	7.99113940	4.71035187		90.00000000	0.38155556	3.04906363	1.905126
91	0.59925640	7.59134670	4.54916309		91.00000000	0.37736264	2.86469061	1.966817
92	0.60936445	7.05972430	4.30194502		92.00000000	0.37326087	2.63511883	1.988305
93	0.61916292	6.40024190	3.96279246		93.00000000	0.36924731	2.36327212	2.009810
94	0.62928063	5.50678300	3.46531188		94.00000000	0.36531915	2.01173328	2.031193
95	0.63940138	4.39844700	2.81237308		95.00000000	0.36147368	1.58992284	2.052561
96	0.64912611	3.04202840	1.97466006		96.00000000	0.35770833	1.08815891	2.073943
97	0.65927583	1.33504520	0.88016303		97.00000000	0.35402062	0.47263353	2.095429
98	0.66902965	-0.65656501	-0.43926146		98.00000000	0.35040816	-0.23006574	2.116803
99	0.67908412	-3.08623240	-2.09581141		99.00000000	0.34686869	-1.07051738	2.138158
100	0.68880439	-5.87943120	-4.04977802		100.00000000	0.34340000	-2.01899667	2.159531
101	0.69908363	-9.24610040	-6.46379743		101.00000000	0.34000000	-3.14367414	2.181013
13:56 02/04/2018
Test Lot:	JK-PERC
Recipe:	Recipe_YJX-LID
Cell Name:	1-30-20min
Test Order:	4
Test Condition:	Light
1	-0.29988718	9.01338580	-2.70299885		1.00000000	34.34000000	309.51966837	0.000000
2	-0.29003561	9.02762130	-2.61833165		2.00000000	17.17000000	155.00425772	0.021604
3	-0.27990121	9.02385900	-2.52578905		3.00000000	11.44666667	103.29310602	0.043010
4	-0.27012482	9.02779290	-2.43863093		4.00000000	8.58500000	77.50360205	0.064420
5	-0.25993609	9.02110100	-2.34490972		5.00000000	6.86800000	61.95692167	0.085768
6	-0.24981062	9.02201180	-2.25379436		6.00000000	5.72333333	51.63598087	0.107302
7	-0.23997022	9.01308730	-2.16287254		7.00000000	4.90571429	44.21563113	0.128686
8	-0.22980829	9.02033810	-2.07294847		8.00000000	4.29250000	38.71980129	0.150131
9	-0.22002371	9.03028960	-1.98687782		9.00000000	3.81555556	34.45557165	0.171569
10	-0.20985582	9.02230070	-1.89338231		10.00000000	3.43400000	30.98258060	0.193041
11	-0.20002212	9.02844330	-1.80588837		11.00000000	3.12181818	28.18515845	0.214422
12	-0.18990707	9.01578040	-1.71216044		12.00000000	2.86166667	25.80015824	0.235801
13	-0.18011728	9.03638080	-1.62760833		13.00000000	2.64153846	23.86994744	0.257173
14	-0.16996875	9.02913950	-1.53467155		14.00000000	2.45285714	22.14718932	0.278666
15	-0.16016258	9.03248880	-1.44666671		15.00000000	2.28933333	20.67837769	0.300062
16	-0.15000214	9.02702520	-1.35407310		16.00000000	2.14625000	19.37425284	0.321440
17	-0.13985285	9.01709750	-1.26106678		17.00000000	2.02000000	18.21453695	0.342822
18	-0.13004968	9.01258660	-1.17208400		18.00000000	1.90777778	17.19401244	0.364327
19	-0.11991378	9.01231290	-1.08070051		19.00000000	1.80736842	16.28856974	0.385704
20	-0.11007264	9.02902410	-0.99384852		20.00000000	1.71700000	15.50283438	0.407091
21	-0.09989805	9.02040480	-0.90112083		21.00000000	1.63523810	14.75050956	0.428432
22	-0.09008891	9.03251740	-0.81372966		22.00000000	1.56090909	14.09893852	0.449909
23	-0.07995228	9.02357100	-0.72145505		23.00000000	1.49304348	13.47258383	0.471311
24	-0.07010667	9.02533820	-0.63273641		24.00000000	1.43083333	12.91375474	0.492701
25	-0.05998790	9.03159140	-0.54178623		25.00000000	1.37360000	12.40579395	0.514191
26	-0.04984085	9.02117060	-0.44962284		26.00000000	1.32076923	11.91488455	0.535584
27	-0.04002055	9.01785660	-0.36089956		27.00000000	1.27185185	11.46937762	0.556932
28	-0.02989508	9.02273650	-0.26973545		28.00000000	1.22642857	11.06574184	0.578306
29	-0.02002640	9.03776930	-0.18099399		29.00000000	1.18413793	10.70196544	0.599806
30	-0.00989424	9.01482770	-0.08919482		30.00000000	1.14466667	10.31897277	0.621189
31	-0.00063067	9.03487400	-0.00569801		31.00000000	1.10774194	10.00830881	0.642651
32	0.00951766	9.01796820	0.08582998		32.00000000	1.07312500	9.67740712	0.664037
33	0.01935183	9.03064630	0.17475950		33.00000000	1.04060606	9.39734527	0.685528
34	0.02949338	9.03324130	0.26642080		34.00000000	1.01000000	9.12357371	0.706923
35	0.03930670	9.01107790	0.35419577		35.00000000	0.98114286	8.84115472	0.728281
36	0.04946091	9.03913590	0.44708386		36.00000000	0.95388889	8.62233130	0.749665
37	0.05926605	9.01464270	0.53426223		37.00000000	0.92810811	8.36656298	0.771153
38	0.06942323	9.03425980	0.62718749		38.00000000	0.90368421	8.16411794	0.792528
39	0.07957446	9.01803210	0.71760502		39.00000000	0.88051282	7.94049288	0.813882
40	0.08935801	9.02197170	0.80618543		40.00000000	0.85850000	7.74536270	0.835278
41	0.09950849	9.01738450	0.89730635		41.00000000	0.83756098	7.55260936	0.856779
42	0.10935456	9.02859690	0.98731824		42.00000000	0.81761905	7.38195280	0.878162
43	0.11952365	9.00923540	1.07681670		43.00000000	0.79860465	7.19481729	0.899536
44	0.12930349	9.02014260	1.16633592		44.00000000	0.78045455	7.03981129	0.920914
45	0.13948448	9.02045150	1.25821299		45.00000000	0.76311111	6.88360677	0.942397
46	0.14930525	9.03040120	1.34828631		46.00000000	0.74652174	6.74139081	0.963789
47	0.15940587	9.02165510	1.43810478		47.00000000	0.73063830	6.59156673	0.985158
48	0.16958016	9.03163150	1.53158551		48.00000000	0.71541667	6.46137970	1.006523
49	0.17939572	9.01755620	1.61771099		49.00000000	0.70081633	6.31965061	1.028005
50	0.18953802	9.03640080	1.71274152		50.00000000	0.68680000	6.20620007	1.049382
51	0.19932306	9.03614520	1.80111211		51.00000000	0.67333333	6.08433777	1.070781
52	0.20945941	9.01019000	1.88726908		52.00000000	0.66038462	5.95019086	1.092151
53	0.21927942	9.01901630	1.97768466		53.00000000	0.64792453	5.84364188	1.113630
54	0.22943959	9.03573510	2.07315536		54.00000000	0.63592593	5.74605821	1.135032
55	0.23924622	9.01516150	2.15684331		55.00000000	0.62436364	5.62873902	1.156420
56	0.24941829	9.03189470	2.25271973		56.00000000	0.61321429	5.53848686	1.177894
57	0.25954643	9.01845070	2.34070668		57.00000000	0.60245614	5.43322100	1.199301
58	0.26939994	9.03088860	2.43292085		58.00000000	0.59206897	5.34690887	1.220656
59	0.27954522	9.01314350	2.51958118		59.00000000	0.58203390	5.24595505	1.242040
60	0.28935185	9.01891990	2.60964116		60.00000000	0.57233333	5.16182849	1.263526
61	0.29948372	9.02944660	2.70417226		61.00000000	0.56295082	5.08313436	1.284904
62	0.30933204	9.01988220	2.79013856		62.00000000	0.55387097	4.99585088	1.306254
63	0.31946763	9.01619630	2.88038286		63.00000000	0.54507937	4.91454255	1.327638
64	0.32930997	9.01595880	2.96904512		64.00000000	0.53656250	4.83762539	1.349135
65	0.33941731	9.01953510	3.06138634		65.00000000	0.52830769	4.76508977	1.370534
66	0.34926337	9.02194500	3.15103491		66.00000000	0.52030303	4.69414532	1.391886
67	0.35941908	9.01360130	3.23966029		67.00000000	0.51253731	4.61980699	1.413262
68	0.36956063	9.01977250	3.33335281		68.00000000	0.50500000	4.55498511	1.434745
69	0.37939253	9.01064010	3.41856954		69.00000000	0.49768116	4.48442581	1.456134
70	0.38950729	9.02580830	3.51561813		70.00000000	0.49057143	4.42780367	1.477473
71	0.39935264	9.00935750	3.59791070		71.00000000	0.48366197	4.35748361	1.498846
72	0.40949643	9.01322080	3.69088174		72.00000000	0.47694444	4.29880559	1.520333
73	0.41933578	9.01591870	3.78069730		73.00000000	0.47041096	4.24118696	1.541710
74	0.42949373	9.01469610	3.87175545		74.00000000	0.46405405	4.18330627	1.563080
75	0.43929440	9.02168850	3.96317724		75.00000000	0.45786667	4.13073044	1.584456
76	0.44945529	8.99396230	4.04238393		76.00000000	0.45184211	4.06385086	1.605947
77	0.45960057	9.01416490	4.14291533		77.00000000	0.44597403	4.02008341	1.627332
78	0.46945706	8.99130060	4.22102955		78.00000000	0.44025641	3.95847773	1.648705
79	0.47956064	8.99347310	4.31291572		79.00000000	0.43468354	3.90931476	1.670080
80	0.48939854	8.97890760	4.39426427		80.00000000	0.42925000	3.85419609	1.691561
81	0.49952522	8.96136280	4.47642672		81.00000000	0.42395062	3.79917529	1.712933
82	0.50936902	8.94638820	4.55701299		82.00000000	0.41878049	3.74657281	1.734372
83	0.51950687	8.91744040	4.63267155		83.00000000	0.41373494	3.68945667	1.755726
84	0.52926439	8.89212420	4.70628469		84.00000000	0.40880952	3.63518506	1.777204
85	0.53942382	8.83228780	4.76434642		85.00000000	0.40400000	3.56824427	1.798588
86	0.54956681	8.75550460	4.81173473		86.00000000	0.39930233	3.49609335	1.819971
87	0.55938834	8.66023540	4.84443470		87.00000000	0.39471264	3.41830441	1.841466
88	0.56950295	8.49529460	4.83809534		88.00000000	0.39022727	3.31509564	1.862860
89	0.57928479	8.29261970	4.80378846		89.00000000	0.38584270	3.19964675	1.924575
90	0.58941495	8.00164700	4.71629037		90.00000000	0.38155556	3.05307287	1.945980
91	0.59922731	7.62077330	4.56657548		91.00000000	0.37736264	2.87579511	1.967332
92	0.60934258	7.10537530	4.32960772		92.00000000	0.37326087	2.65215856	1.988820
93	0.61916834	6.44110390	3.98812761		93.00000000	0.36924731	2.37836030	2.010349
94	0.62925380	5.55761430	3.49714992		94.00000000	0.36531915	2.03030293	2.031743
95	0.63937503	4.42943530	2.83207033		95.00000000	0.36147368	1.60112430	2.053106
96	0.64916658	3.08415150	2.00212808		96.00000000	0.35770833	1.10322669	2.074491
97	0.65931833	1.35701260	0.89470328		97.00000000	0.35402062	0.48041044	2.096020
98	0.66898853	-0.65850508	-0.44053235		98.00000000	0.35040816	-0.23074556	2.117417
99	0.67907029	-3.12843350	-2.12442624		99.00000000	0.34686869	-1.08515562	2.138770
100	0.68881565	-5.98951530	-4.12567187		100.00000000	0.34340000	-2.05679955	2.160164
101	0.69913191	-9.47307210	-6.62292699		101.00000000	0.34000000	-3.22084451	2.181662
