# Supplementary material for: Study on the Electrical Injection Regeneration of Industrialized B-Doped Czochralski Silicon PERC Solar Cells
Source: Hindawi journal article supplement (doi:10.1155/2019/5357370), 2019-06-20
Supplement: f1 [file 5357370.f1.zip › section3.2/IVRawData_1-30-30min.csv]

14:20 02/04/2018
Test Lot:	JK-PERC
Recipe:	Recipe_YJX-LID
Cell Name:	1-30-30min
Test Order:	2
Test Condition:	Light
1	-0.29994768	9.01942540	-2.70535572		1.00000000	34.34000000	309.72706824	0.000000
2	-0.29013517	9.02266410	-2.61779218		2.00000000	17.17000000	154.91914260	0.061793
3	-0.28000337	9.02170660	-2.52610825		3.00000000	11.44666667	103.26846821	0.083223
4	-0.27019757	9.02557660	-2.43868887		4.00000000	8.58500000	77.48457511	0.104720
5	-0.26003376	9.02877900	-2.34778735		5.00000000	6.86800000	62.00965417	0.126121
6	-0.24984987	9.02547840	-2.25501460		6.00000000	5.72333333	51.65582138	0.147462
7	-0.24000908	9.02468400	-2.16600610		7.00000000	4.90571429	44.27252122	0.168829
8	-0.22988473	9.03293320	-2.07653341		8.00000000	4.29250000	38.77386576	0.190332
9	-0.22007893	9.02025320	-1.98516767		9.00000000	3.81555556	34.41727721	0.211763
10	-0.20992777	9.02719880	-1.89505971		10.00000000	3.43400000	30.99940068	0.233133
11	-0.20011750	9.01874730	-1.80480916		11.00000000	3.12181818	28.15488930	0.254528
12	-0.18995668	9.02733420	-1.71480243		12.00000000	2.86166667	25.83322137	0.276015
13	-0.18017693	9.02370260	-1.62586303		13.00000000	2.64153846	23.83645748	0.297405
14	-0.17004885	9.03241730	-1.53595217		14.00000000	2.45285714	22.15522929	0.318769
15	-0.16019094	9.03127570	-1.44672854		15.00000000	2.28933333	20.67560050	0.340153
16	-0.15004426	9.02461050	-1.35409100		16.00000000	2.14625000	19.36907029	0.361640
17	-0.13988715	9.01347060	-1.26086871		17.00000000	2.02000000	18.20721061	0.383020
18	-0.13007614	9.02784440	-1.17430715		18.00000000	1.90777778	17.22312093	0.404369
19	-0.11990862	9.01800820	-1.08133692		19.00000000	1.80736842	16.29886324	0.425747
20	-0.11007899	9.01806160	-0.99269911		20.00000000	1.71700000	15.48401177	0.447228
21	-0.09996208	9.02762600	-0.90242025		21.00000000	1.63523810	14.76231794	0.468613
22	-0.09013990	9.01624770	-0.81272363		22.00000000	1.56090909	14.07354300	0.489968
23	-0.07998056	9.02464680	-0.72179630		23.00000000	1.49304348	13.47419005	0.511346
24	-0.07016955	9.01884750	-0.63284843		24.00000000	1.43083333	12.90446763	0.532822
25	-0.06000351	9.01876930	-0.54115783		25.00000000	1.37360000	12.38818151	0.554211
26	-0.04985236	9.02319150	-0.44982743		26.00000000	1.32076923	11.91755370	0.575594
27	-0.04001009	9.01340200	-0.36062700		27.00000000	1.27185185	11.46371203	0.596927
28	-0.02992444	9.03251270	-0.27029285		28.00000000	1.22642857	11.07773165	0.618425
29	-0.02006058	9.01945210	-0.18093540		29.00000000	1.18413793	10.68027535	0.639800
30	-0.00996897	9.02116390	-0.08993170		30.00000000	1.14466667	10.32622561	0.661189
31	-0.00064545	9.03126240	-0.00582924		31.00000000	1.10774194	10.00430809	0.682707
32	0.00946083	9.02627280	0.08539607		32.00000000	1.07312500	9.68631900	0.704184
33	0.01927901	9.02607540	0.17401382		33.00000000	1.04060606	9.39258876	0.725577
34	0.02940234	9.01884940	0.26517524		34.00000000	1.01000000	9.10903789	0.746946
35	0.03925252	9.02781960	0.35436463		35.00000000	0.98114286	8.85758072	0.768321
36	0.04938328	9.02548980	0.44570832		36.00000000	0.95388889	8.60931444	0.789802
37	0.05919104	9.02199360	0.53402119		37.00000000	0.92810811	8.37338541	0.811192
38	0.06937167	9.02697850	0.62621657		38.00000000	0.90368421	8.15753794	0.832569
39	0.07950988	9.02105900	0.71726329		39.00000000	0.88051282	7.94315810	0.853948
40	0.08932880	9.03335000	0.80693834		40.00000000	0.85850000	7.75513098	0.875443
41	0.09946775	9.01210210	0.89641355		41.00000000	0.83756098	7.54818503	0.896810
42	0.10925840	9.02781110	0.98636420		42.00000000	0.81761905	7.38131031	0.918219
43	0.11942935	9.01552010	1.07671771		43.00000000	0.79860465	7.19983628	0.939572
44	0.12928325	9.03162290	1.16763756		44.00000000	0.78045455	7.04877115	0.961048
45	0.13943113	9.02001760	1.25767125		45.00000000	0.76311111	6.88327565	0.982447
46	0.14922772	9.01280780	1.34496076		46.00000000	0.74652174	6.72825695	1.003832
47	0.15939198	9.03294660	1.43977924		47.00000000	0.73063830	6.59981673	1.025329
48	0.16953912	9.02058320	1.52934174		48.00000000	0.71541667	6.45347556	1.046707
49	0.17937219	9.02165790	1.61823453		49.00000000	0.70081633	6.32252515	1.068061
50	0.18952008	9.02128220	1.70971412		50.00000000	0.68680000	6.19581661	1.089450
51	0.19929658	9.02601910	1.79885474		51.00000000	0.67333333	6.07751953	1.110954
52	0.20945933	9.02672960	1.89073273		52.00000000	0.66038462	5.96111336	1.132340
53	0.21926412	9.02457330	1.97876512		53.00000000	0.64792453	5.84724240	1.153709
54	0.22939265	9.02974220	2.07135649		54.00000000	0.63592593	5.74224717	1.175081
55	0.23925474	9.02220540	2.15860541		55.00000000	0.62436364	5.63313697	1.196618
56	0.24936020	9.03228380	2.25229209		56.00000000	0.61321429	5.53872546	1.218011
57	0.25954604	9.01428790	2.33962273		57.00000000	0.60245614	5.43071310	1.239360
58	0.26934114	9.01725390	2.42871745		58.00000000	0.59206897	5.33883619	1.260736
59	0.27947414	9.02301120	2.52169830		59.00000000	0.58203390	5.25169838	1.282223
60	0.28932509	9.02231880	2.61038320		60.00000000	0.57233333	5.16377379	1.303611
61	0.29945660	9.02413460	2.70233667		61.00000000	0.56295082	5.08014397	1.324977
62	0.30928889	9.02031990	2.78988473		62.00000000	0.55387097	4.99609331	1.346353
63	0.31945017	9.00612260	2.87700740		63.00000000	0.54507937	4.90905159	1.367837
64	0.32925868	9.02815820	2.97259945		64.00000000	0.53656250	4.84417113	1.389229
65	0.33936116	9.00927350	3.05739751		65.00000000	0.52830769	4.75966849	1.410593
66	0.34920987	9.01817320	3.14923509		66.00000000	0.52030303	4.69218284	1.431967
67	0.35936072	9.01947210	3.24124399		67.00000000	0.51253731	4.62281600	1.453465
68	0.36951977	9.02400970	3.33454999		68.00000000	0.50500000	4.55712490	1.474851
69	0.37934837	9.02279280	3.42278174		69.00000000	0.49768116	4.49047398	1.496220
70	0.38947541	9.00069050	3.50554762		70.00000000	0.49057143	4.41548160	1.517600
71	0.39931667	9.02613260	3.60428521		71.00000000	0.48366197	4.36559709	1.539083
72	0.40946454	9.01285460	3.69044436		72.00000000	0.47694444	4.29863093	1.560475
73	0.41923508	9.00760270	3.77630304		73.00000000	0.47041096	4.23727502	1.581859
74	0.42941871	9.01415440	3.87084655		74.00000000	0.46405405	4.18305489	1.603206
75	0.43924135	9.00598240	3.95579987		75.00000000	0.45786667	4.12353914	1.624677
76	0.44939965	9.02100180	4.05403505		76.00000000	0.45184211	4.07606844	1.646058
77	0.45954010	9.00130270	4.13645954		77.00000000	0.44597403	4.01434720	1.667440
78	0.46937388	8.99859710	4.22370644		78.00000000	0.44025641	3.96169006	1.688926
79	0.47953293	8.99145600	4.31169924		79.00000000	0.43468354	3.90843796	1.710331
80	0.48935634	8.97580050	4.39236488		80.00000000	0.42925000	3.85286236	1.731679
81	0.49949452	8.96270940	4.47682423		81.00000000	0.42395062	3.79974618	1.753068
82	0.50931793	8.95854760	4.56274892		82.00000000	0.41878049	3.75166493	1.774548
83	0.51946950	8.91683860	4.63202569		83.00000000	0.41373494	3.68920768	1.795929
84	0.52925122	8.88794040	4.70395330		84.00000000	0.40880952	3.63347468	1.817304
85	0.53938645	8.81966970	4.75721033		85.00000000	0.40400000	3.56314656	1.838683
86	0.54951274	8.74990650	4.80818510		86.00000000	0.39930233	3.49385801	1.860165
87	0.55931383	8.64496520	4.83524860		87.00000000	0.39471264	3.41227707	1.881538
88	0.56945354	8.47315690	4.82506919		88.00000000	0.39022727	3.30645691	1.902891
89	0.57926428	8.28761480	4.80071922		89.00000000	0.38584270	3.19771564	1.924274
90	0.58939058	7.97531560	4.70057589		90.00000000	0.38155556	3.04302597	1.945780
91	0.59921098	7.59960410	4.55376622		91.00000000	0.37736264	2.86780665	1.967172
92	0.60931492	7.07851030	4.31304194		92.00000000	0.37326087	2.64213091	1.988646
93	0.61910486	6.39666410	3.96020583		93.00000000	0.36924731	2.36195102	2.010054
94	0.62921405	5.52325820	3.47531166		94.00000000	0.36531915	2.01775198	2.031550
95	0.63935000	4.38132050	2.80119726		95.00000000	0.36147368	1.58373206	2.052951
96	0.64909893	3.05671810	1.98411245		96.00000000	0.35770833	1.09341354	2.074318
97	0.65923417	1.32815580	0.87556569		97.00000000	0.35402062	0.47019454	2.095697
98	0.66896307	-0.64366221	-0.43058625		98.00000000	0.35040816	-0.22554449	2.117196
99	0.67905068	-3.08965130	-2.09802982		99.00000000	0.34686869	-1.07170329	2.138577
100	0.68873411	-5.86725140	-4.04097617		100.00000000	0.34340000	-2.01481413	2.159951
101	0.69904500	-9.23804380	-6.45780833		101.00000000	0.34000000	-3.14093489	2.181319
14:21 02/04/2018
Test Lot:	JK-PERC
Recipe:	Recipe_YJX-LID
Cell Name:	1-30-30min
Test Order:	3
Test Condition:	Light
1	-0.29994246	9.02303310	-2.70639074		1.00000000	34.34000000	309.85095665	0.000000
2	-0.29008010	9.02325530	-2.61746680		2.00000000	17.17000000	154.92929350	0.021595
3	-0.27998626	9.00582890	-2.52150835		3.00000000	11.44666667	103.08672148	0.042981
4	-0.27020577	9.03331850	-2.44085478		4.00000000	8.58500000	77.55103932	0.064347
5	-0.26003450	9.01902100	-2.34525662		5.00000000	6.86800000	61.94263623	0.085780
6	-0.24984838	9.02661990	-2.25528636		6.00000000	5.72333333	51.66235456	0.107276
7	-0.24005894	9.01964570	-2.16524659		7.00000000	4.90571429	44.24780476	0.128670
8	-0.22988994	9.01434330	-2.07230684		8.00000000	4.29250000	38.69406862	0.150013
9	-0.22000505	9.02006820	-1.98446056		9.00000000	3.81555556	34.41657133	0.171377
10	-0.20985742	9.01849560	-1.89259822		10.00000000	3.43400000	30.96951389	0.233070
11	-0.20004772	9.00986100	-1.80240215		11.00000000	3.12181818	28.12714789	0.254479
12	-0.18991423	9.02254100	-1.71350893		12.00000000	2.86166667	25.81950483	0.275964
13	-0.18010972	9.02584740	-1.62564285		13.00000000	2.64153846	23.84212306	0.297352
14	-0.16995019	9.03040310	-1.53471872		14.00000000	2.45285714	22.15028875	0.318725
15	-0.16012782	9.02065850	-1.44445838		15.00000000	2.28933333	20.65129419	0.340089
16	-0.15000997	9.02522280	-1.35387340		16.00000000	2.14625000	19.37038443	0.361566
17	-0.13984151	9.01122470	-1.26014327		17.00000000	2.02000000	18.20267389	0.382933
18	-0.13000500	9.03353400	-1.17440459		18.00000000	1.90777778	17.23397542	0.404307
19	-0.11986481	9.02631760	-1.08193784		19.00000000	1.80736842	16.31388139	0.425676
20	-0.11005510	9.01553150	-0.99220522		20.00000000	1.71700000	15.47966759	0.447162
21	-0.09990674	9.03362750	-0.90252023		21.00000000	1.63523810	14.77213183	0.468532
22	-0.09008213	9.00996780	-0.81163710		22.00000000	1.56090909	14.06374065	0.489915
23	-0.07994121	9.03126620	-0.72197031		23.00000000	1.49304348	13.48407310	0.511396
24	-0.07012182	9.00915150	-0.63173807		24.00000000	1.43083333	12.89059427	0.532769
25	-0.05997345	9.02690980	-0.54137491		25.00000000	1.37360000	12.39936330	0.554143
26	-0.04985932	9.02984910	-0.45022213		26.00000000	1.32076923	11.92634685	0.575519
27	-0.03998411	9.02339080	-0.36079222		27.00000000	1.27185185	11.47641630	0.596994
28	-0.02986179	9.02897640	-0.26962137		28.00000000	1.22642857	11.07339463	0.618373
29	-0.02001635	9.01223090	-0.18039193		29.00000000	1.18413793	10.67172445	0.639718
30	-0.00989924	9.02802470	-0.08937058		30.00000000	1.14466667	10.33407894	0.661099
31	-0.00063285	9.01992420	-0.00570829		31.00000000	1.10774194	9.99174829	0.682699
32	0.00949447	9.01000310	0.08554517		32.00000000	1.07312500	9.66885958	0.704077
33	0.01931209	9.03036790	0.17439527		33.00000000	1.04060606	9.39705557	0.725430
34	0.02947133	9.01573850	0.26570580		34.00000000	1.01000000	9.10589589	0.746803
35	0.03928449	9.02174660	0.35441471		35.00000000	0.98114286	8.85162224	0.768284
36	0.04946011	9.01955030	0.44610791		36.00000000	0.95388889	8.60364881	0.789665
37	0.05924052	9.02258970	0.53450287		37.00000000	0.92810811	8.37393866	0.811022
38	0.06943176	9.02097420	0.62634211		38.00000000	0.90368421	8.15211195	0.832400
39	0.07953518	9.02701380	0.71796516		39.00000000	0.88051282	7.94840138	0.853884
40	0.08940193	9.02784440	0.80710672		40.00000000	0.85850000	7.75040442	0.875258
41	0.09952246	9.02042480	0.89773490		41.00000000	0.83756098	7.55515580	0.896615
42	0.10936391	9.00906180	0.98526622		42.00000000	0.81761905	7.36598053	0.917991
43	0.11952538	9.01598550	1.07763909		43.00000000	0.79860465	7.20020796	0.939465
44	0.12930952	9.02899460	1.16753496		44.00000000	0.78045455	7.04671988	0.960848
45	0.13947025	9.01438710	1.25723882		45.00000000	0.76311111	6.87897896	0.982209
46	0.14929903	9.02865410	1.34796930		46.00000000	0.74652174	6.74008656	1.003569
47	0.15944859	9.02224250	1.43858385		47.00000000	0.73063830	6.59199590	1.025041
48	0.16961603	9.02017310	1.52996595		48.00000000	0.71541667	6.45318217	1.046408
49	0.17940389	9.01893330	1.61803172		49.00000000	0.70081633	6.32061570	1.067793
50	0.18957354	9.02041820	1.71003261		50.00000000	0.68680000	6.19522322	1.089166
51	0.19936362	9.01916500	1.79809338		51.00000000	0.67333333	6.07290443	1.110630
52	0.20948194	9.00764180	1.88693828		52.00000000	0.66038462	5.94850807	1.132008
53	0.21931742	9.02938840	1.98030217		53.00000000	0.64792453	5.85036222	1.153399
54	0.22941712	9.01250930	2.06762393		54.00000000	0.63592593	5.73128832	1.174874
55	0.23926750	9.02348230	2.15902605		55.00000000	0.62436364	5.63393422	1.196250
56	0.24939846	9.01781180	2.24902838		56.00000000	0.61321429	5.52985102	1.217614
57	0.25955248	9.02817150	2.34328430		57.00000000	0.60245614	5.43907736	1.238998
58	0.26939541	9.01325700	2.42813006		58.00000000	0.59206897	5.33646975	1.260484
59	0.27952415	9.02284620	2.52210341		59.00000000	0.58203390	5.25160235	1.281866
60	0.28935516	9.01241970	2.60779014		60.00000000	0.57233333	5.15810821	1.303224
61	0.29948613	9.02360730	2.70244523		61.00000000	0.56295082	5.07984713	1.324612
62	0.30930746	9.02120400	2.79032570		62.00000000	0.55387097	4.99658299	1.346092
63	0.31947935	9.01863960	2.88126912		63.00000000	0.54507937	4.91587435	1.367464
64	0.32928658	9.01775840	2.96942682		64.00000000	0.53656250	4.83859099	1.388819
65	0.33946145	9.01396850	3.05989482		65.00000000	0.52830769	4.76214890	1.410198
66	0.34926715	9.01628780	3.14909314		66.00000000	0.52030303	4.69120186	1.431666
67	0.35940778	9.01329040	3.23944669		67.00000000	0.51253731	4.61964765	1.453044
68	0.36956999	9.01597880	3.33203519		68.00000000	0.50500000	4.55306929	1.474391
69	0.37941888	9.01465890	3.42033178		69.00000000	0.49768116	4.48642589	1.495756
70	0.38952082	9.02428340	3.51514627		70.00000000	0.49057143	4.42705560	1.517246
71	0.39936152	9.00955580	3.59806990		71.00000000	0.48366197	4.35757952	1.538626
72	0.40950513	9.01313020	3.69092305		72.00000000	0.47694444	4.29876238	1.559988
73	0.41934732	9.00724120	3.77716246		73.00000000	0.47041096	4.23710497	1.581373
74	0.42947826	9.01627920	3.87229590		74.00000000	0.46405405	4.18404092	1.602847
75	0.43931302	9.00939370	3.95794395		75.00000000	0.45786667	4.12510106	1.624235
76	0.44947299	9.00471400	4.04737573		76.00000000	0.45184211	4.06870893	1.645599
77	0.45958683	9.01028350	4.14100763		77.00000000	0.44597403	4.01835241	1.666958
78	0.46947220	8.98893830	4.22005664		78.00000000	0.44025641	3.95743771	1.688424
79	0.47957337	8.99282360	4.31271872		79.00000000	0.43468354	3.90903244	1.709790
80	0.48941258	8.97846320	4.39417284		80.00000000	0.42925000	3.85400533	1.731172
81	0.49955174	8.95413590	4.47305417		81.00000000	0.42395062	3.79611144	1.752529
82	0.50935894	8.94990730	4.55871530		82.00000000	0.41878049	3.74804654	1.774009
83	0.51950479	8.91870310	4.63330898		83.00000000	0.41373494	3.68997909	1.795383
84	0.52927774	8.87539770	4.69755044		84.00000000	0.40880952	3.62834711	1.816771
85	0.53943032	8.82797810	4.76207905		85.00000000	0.40400000	3.56650315	1.838257
86	0.54957616	8.74037840	4.80350360		86.00000000	0.39930233	3.49005342	1.859643
87	0.55938709	8.64605050	4.83648903		87.00000000	0.39471264	3.41270545	1.880989
88	0.56953216	8.47675800	4.82778629		88.00000000	0.39022727	3.30786216	1.902358
89	0.57933414	8.26962850	4.79087812		89.00000000	0.38584270	3.19077576	1.923838
90	0.58945024	7.97587010	4.70137854		90.00000000	0.38155556	3.04323755	1.945222
91	0.59926337	7.59224940	4.54975696		91.00000000	0.37736264	2.86503126	1.966564
92	0.60935938	7.06055120	4.30241310		92.00000000	0.37326087	2.63542748	1.988041
93	0.61915022	6.39585640	3.95999590		93.00000000	0.36924731	2.36165278	2.009545
94	0.62926406	5.51469660	3.47020037		94.00000000	0.36531915	2.01462427	2.030923
95	0.63939577	4.39395900	2.80947880		95.00000000	0.36147368	1.58830055	2.052300
96	0.64914119	3.04990910	1.97982162		96.00000000	0.35770833	1.09097790	2.073726
97	0.65930116	1.34659060	0.88780874		97.00000000	0.35402062	0.47672084	2.095231
98	0.66898406	-0.63969535	-0.42794599		98.00000000	0.35040816	-0.22415447	2.116624
99	0.67910236	-3.05589080	-2.07526265		99.00000000	0.34686869	-1.05999283	2.137970
100	0.68879348	-5.84206720	-4.02397780		100.00000000	0.34340000	-2.00616588	2.159358
101	0.69908297	-9.18868920	-6.42365614		101.00000000	0.34000000	-3.12415433	2.180826
14:21 02/04/2018
Test Lot:	JK-PERC
Recipe:	Recipe_YJX-LID
Cell Name:	1-30-30min
Test Order:	4
Test Condition:	Light
1	-0.29993564	9.02576730	-2.70714929		1.00000000	34.34000000	309.94484908	0.000000
2	-0.29003361	9.02216910	-2.61673227		2.00000000	17.17000000	154.91064345	0.021713
3	-0.27991578	9.02652650	-2.52666721		3.00000000	11.44666667	103.32364000	0.043107
4	-0.27013135	9.01979450	-2.43652927		4.00000000	8.58500000	77.43493578	0.064462
5	-0.25996736	9.01197050	-2.34281818		5.00000000	6.86800000	61.89421339	0.085842
6	-0.24982643	9.04092880	-2.25866297		6.00000000	5.72333333	51.74424917	0.107331
7	-0.24001598	9.01614950	-2.16401996		7.00000000	4.90571429	44.23065340	0.128712
8	-0.22986463	9.03173350	-2.07607608		8.00000000	4.29250000	38.76871605	0.150076
9	-0.22006905	9.01607420	-1.98415888		9.00000000	3.81555556	34.40133200	0.171456
10	-0.20990504	9.03414730	-1.89631305		10.00000000	3.43400000	31.02326183	0.192919
11	-0.20007689	9.01173110	-1.80303913		11.00000000	3.12181818	28.13298600	0.254541
12	-0.18991753	9.01270390	-1.71167046		12.00000000	2.86166667	25.79135433	0.276027
13	-0.18014520	9.02157880	-1.62519412		13.00000000	2.64153846	23.83084738	0.297406
14	-0.17000222	9.01865860	-1.53319198		14.00000000	2.45285714	22.12148117	0.318758
15	-0.16017036	9.02041050	-1.44480240		15.00000000	2.28933333	20.65072644	0.340135
16	-0.15001622	9.02998350	-1.35464399		16.00000000	2.14625000	19.38060209	0.361606
17	-0.13989854	9.01734350	-1.26151319		17.00000000	2.02000000	18.21503387	0.382998
18	-0.13007039	9.02254390	-1.17356580		18.00000000	1.90777778	17.21300875	0.404362
19	-0.11989839	9.01913550	-1.08137983		19.00000000	1.80736842	16.30090069	0.425722
20	-0.11006057	9.01155570	-0.99181696		20.00000000	1.71700000	15.47284114	0.447197
21	-0.09990270	9.03024200	-0.90214553		21.00000000	1.63523810	14.76659573	0.468583
22	-0.09006636	9.01098820	-0.81158689		22.00000000	1.56090909	14.06533340	0.489966
23	-0.07993753	9.02865510	-0.72172834		23.00000000	1.49304348	13.48017461	0.511325
24	-0.07010640	9.01509860	-0.63201606		24.00000000	1.43083333	12.89910358	0.532808
25	-0.05999245	9.02123550	-0.54120599		25.00000000	1.37360000	12.39156908	0.554247
26	-0.04979886	9.02216630	-0.44929357		26.00000000	1.32076923	11.91619964	0.575632
27	-0.04000718	9.02660750	-0.36112909		27.00000000	1.27185185	11.48050746	0.597112
28	-0.02986420	9.00535110	-0.26893760		28.00000000	1.22642857	11.04441988	0.618497
29	-0.01998842	9.03114030	-0.18051819		29.00000000	1.18413793	10.69411579	0.639851
30	-0.00989382	9.01671410	-0.08920971		30.00000000	1.14466667	10.32113207	0.661234
31	-0.00061271	9.02060600	-0.00552700		31.00000000	1.10774194	9.99250355	0.682836
32	0.00953155	9.01445770	0.08592176		32.00000000	1.07312500	9.67363992	0.704218
33	0.01935347	9.01356030	0.17444363		33.00000000	1.04060606	9.37956548	0.725555
34	0.02949020	9.02669240	0.26619897		34.00000000	1.01000000	9.11695932	0.746929
35	0.03932477	9.01917270	0.35467687		35.00000000	0.98114286	8.84909687	0.768410
36	0.04946969	9.01911740	0.44617295		36.00000000	0.95388889	8.60323588	0.789785
37	0.05928193	9.01966000	0.53470285		37.00000000	0.92810811	8.37121958	0.811135
38	0.06940080	9.02372360	0.62625365		38.00000000	0.90368421	8.15459654	0.832506
39	0.07954870	9.00511740	0.71634540		39.00000000	0.88051282	7.92912132	0.853973
40	0.08936541	9.02198310	0.80625320		40.00000000	0.85850000	7.74537249	0.875363
41	0.09951480	9.02378650	0.89800028		41.00000000	0.83756098	7.55797142	0.896714
42	0.10934936	9.01871200	0.98619039		42.00000000	0.81761905	7.37387072	0.918094
43	0.11948015	9.01544760	1.07716703		43.00000000	0.79860465	7.19977839	0.939576
44	0.12932885	9.02271560	1.16689743		44.00000000	0.78045455	7.04181940	0.960940
45	0.13947080	9.01838970	1.25780203		45.00000000	0.76311111	6.88203338	0.982297
46	0.14929792	9.01243020	1.34553708		46.00000000	0.74652174	6.72797507	1.003668
47	0.15944284	9.03761200	1.44098252		47.00000000	0.73063830	6.60322545	1.025153
48	0.16958256	9.01557450	1.52888420		48.00000000	0.71541667	6.44989226	1.046551
49	0.17942308	9.02715970	1.61968080		49.00000000	0.70081633	6.32638090	1.067916
50	0.18954344	9.02005670	1.70969258		50.00000000	0.68680000	6.19497494	1.089281
51	0.19931325	9.02243710	1.79829126		51.00000000	0.67333333	6.07510765	1.110755
52	0.20946935	9.01948640	1.88930595		52.00000000	0.66038462	5.95633006	1.132138
53	0.21928605	9.01879690	1.97769635		53.00000000	0.64792453	5.84349973	1.153525
54	0.22945553	9.00846000	2.06704096		54.00000000	0.63592593	5.72871327	1.174879
55	0.23929085	9.01739030	2.15777899		55.00000000	0.62436364	5.63013060	1.196356
56	0.24944024	9.01844500	2.24956309		56.00000000	0.61321429	5.53023931	1.217744
57	0.25957251	9.02702620	2.34316785		57.00000000	0.60245614	5.43838736	1.239119
58	0.26936242	9.01179600	2.42743918		58.00000000	0.59206897	5.33560474	1.260589
59	0.27952296	9.01885220	2.52097626		59.00000000	0.58203390	5.24927770	1.281980
60	0.28937539	9.00850680	2.60684017		60.00000000	0.57233333	5.15586873	1.303329
61	0.29952925	9.01232150	2.69945390		61.00000000	0.56295082	5.07349378	1.324697
62	0.30933702	9.03350450	2.79439736		62.00000000	0.55387097	5.00339588	1.346189
63	0.31947747	9.00580120	2.87715058		63.00000000	0.54507937	4.90887640	1.367565
64	0.32929716	9.02543260	2.97204932		64.00000000	0.53656250	4.84270868	1.388911
65	0.33947036	9.03248500	3.06626093		65.00000000	0.52830769	4.77193131	1.410294
66	0.34926176	9.00203990	3.14406830		66.00000000	0.52030303	4.68378864	1.431776
67	0.35940146	9.02787400	3.24463110		67.00000000	0.51253731	4.62712229	1.453152
68	0.36958286	9.01831440	3.33301443		68.00000000	0.50500000	4.55424877	1.474509
69	0.37941745	9.01623540	3.42091704		69.00000000	0.49768116	4.48721049	1.495878
70	0.38950133	9.02323630	3.51456254		70.00000000	0.49057143	4.42654192	1.517352
71	0.39934856	9.00872520	3.59762144		71.00000000	0.48366197	4.35717779	1.538726
72	0.40949050	9.01381210	3.69107042		72.00000000	0.47694444	4.29908760	1.560077
73	0.41932654	9.01410770	3.77985459		73.00000000	0.47041096	4.24033505	1.581464
74	0.42945585	9.01824950	3.87294000		74.00000000	0.46405405	4.18495524	1.602941
75	0.43927702	9.00383570	3.95517811		75.00000000	0.45786667	4.12255624	1.624311
76	0.44942641	9.00294400	4.04616080		76.00000000	0.45184211	4.06790917	1.645679
77	0.45961225	9.00341320	4.13807900		77.00000000	0.44597403	4.01528843	1.667059
78	0.46944460	8.98900220	4.21983854		78.00000000	0.44025641	3.95746584	1.688535
79	0.47958356	8.98847010	4.31072249		79.00000000	0.43468354	3.90714004	1.709923
80	0.48940474	8.97606850	4.39293047		80.00000000	0.42925000	3.85297740	1.731281
81	0.49951988	8.96394730	4.47766988		81.00000000	0.42395062	3.80027099	1.752648
82	0.50935745	8.94788930	4.55767408		82.00000000	0.41878049	3.74720145	1.774145
83	0.51950014	8.91769120	4.63274183		83.00000000	0.41373494	3.68956043	1.795523
84	0.52925503	8.87514590	4.69721561		84.00000000	0.40880952	3.62824417	1.816913
85	0.53941339	8.82485580	4.76024538		85.00000000	0.40400000	3.56524174	1.838252
86	0.54955679	8.75840280	4.81323973		86.00000000	0.39930233	3.49725061	1.859721
87	0.55940104	8.64638710	4.83679794		87.00000000	0.39471264	3.41283831	1.881111
88	0.56951696	8.47034360	4.82400434		88.00000000	0.39022727	3.30535908	1.902488
89	0.57933664	8.28635030	4.80058634		89.00000000	0.38584270	3.19722774	1.923957
90	0.58946073	7.97117760	4.69869617		90.00000000	0.38155556	3.04144710	1.945349
91	0.59926552	7.59839340	4.55345517		91.00000000	0.37736264	2.86734977	1.966691
92	0.60935462	7.07154660	4.30907959		92.00000000	0.37326087	2.63953163	1.988161
93	0.61917430	6.39671750	3.96068308		93.00000000	0.36924731	2.36197074	2.009666
94	0.62929165	5.52465820	3.47662127		94.00000000	0.36531915	2.01826343	2.031094
95	0.63938004	4.39462800	2.80983743		95.00000000	0.36147368	1.58854237	2.052453
96	0.64917070	3.05666210	1.98429548		96.00000000	0.35770833	1.09339351	2.073847
97	0.65929031	1.34664420	0.88782947		97.00000000	0.35402062	0.47673981	2.095334
98	0.66901100	-0.63991845	-0.42811248		98.00000000	0.35040816	-0.22423265	2.116722
99	0.67909938	-3.06306390	-2.08012480		99.00000000	0.34686869	-1.06248095	2.138074
100	0.68877244	-5.84623910	-4.02672837		100.00000000	0.34340000	-2.00759851	2.159441
101	0.69909745	-9.20741270	-6.43687874		101.00000000	0.34000000	-3.13052032	2.180910
