# Supplementary material for: Study on the Electrical Injection Regeneration of Industrialized B-Doped Czochralski Silicon PERC Solar Cells
Source: Hindawi journal article supplement (doi:10.1155/2019/5357370), 2019-06-20
Supplement: f1 [file 5357370.f1.zip › section3.2/IVRawData_1-30-40min.csv]

14:34 02/04/2018
Test Lot:	JK-PERC
Recipe:	Recipe_YJX-LID
Cell Name:	1-30-40min
Test Order:	2
Test Condition:	Light
1	-0.29994196	9.03219220	-2.70913343		1.00000000	34.34000000	310.16548015	0.000000
2	-0.29016879	9.01609420	-2.61618914		2.00000000	17.17000000	154.80633741	0.061795
3	-0.28002051	9.02448080	-2.52703972		3.00000000	11.44666667	103.30022356	0.083216
4	-0.27021384	9.02507780	-2.43870093		4.00000000	8.58500000	77.48029291	0.104728
5	-0.26008046	9.03247450	-2.34917012		5.00000000	6.86800000	62.03503487	0.126130
6	-0.24990538	9.02648350	-2.25576679		6.00000000	5.72333333	51.66157390	0.147513
7	-0.24008757	9.02852060	-2.16763557		7.00000000	4.90571429	44.29134249	0.168947
8	-0.22993630	9.03329750	-2.07708300		8.00000000	4.29250000	38.77542952	0.190436
9	-0.22014454	9.02121930	-1.98597217		9.00000000	3.81555556	34.42096342	0.211817
10	-0.20997244	9.03700730	-1.89752247		10.00000000	3.43400000	31.03308307	0.233167
11	-0.20014271	9.02187350	-1.80566221		11.00000000	3.12181818	28.16464873	0.254530
12	-0.19000039	9.01902680	-1.71361861		12.00000000	2.86166667	25.80944836	0.276012
13	-0.18023169	9.01709750	-1.62516672		13.00000000	2.64153846	23.81900986	0.297402
14	-0.17007746	9.03469940	-1.53659873		14.00000000	2.45285714	22.16082696	0.318754
15	-0.16023508	9.03620910	-1.44791769		15.00000000	2.28933333	20.68689470	0.340134
16	-0.15012476	9.03609940	-1.35654225		16.00000000	2.14625000	19.39372834	0.361623
17	-0.13994969	9.02025990	-1.26238258		17.00000000	2.02000000	18.22092500	0.383000
18	-0.13015866	9.04167840	-1.17685274		18.00000000	1.90777778	17.24951313	0.404361
19	-0.12002899	9.02328590	-1.08305589		19.00000000	1.80736842	16.30840199	0.425766
20	-0.11016800	9.02739430	-0.99452998		20.00000000	1.71700000	15.50003601	0.447245
21	-0.10002196	9.01960750	-0.90215882		21.00000000	1.63523810	14.74920579	0.468641
22	-0.09019446	9.02085400	-0.81363109		22.00000000	1.56090909	14.08073302	0.489987
23	-0.08007596	9.02053170	-0.72232771		23.00000000	1.49304348	13.46804603	0.511353
24	-0.07022093	9.02425380	-0.63369145		24.00000000	1.43083333	12.91220315	0.532832
25	-0.06005255	9.01893810	-0.54161021		25.00000000	1.37360000	12.38841337	0.554214
26	-0.04993181	9.02095890	-0.45043280		26.00000000	1.32076923	11.91460495	0.575615
27	-0.04009464	9.02374940	-0.36180395		27.00000000	1.27185185	11.47687239	0.596984
28	-0.02996125	9.01940540	-0.27023261		28.00000000	1.22642857	11.06165648	0.618462
29	-0.02015161	9.01959230	-0.18175933		29.00000000	1.18413793	10.68044136	0.639860
30	-0.00999738	9.03305050	-0.09030684		30.00000000	1.14466667	10.33983181	0.661240
31	-0.00069237	9.02584550	-0.00624924		31.00000000	1.10774194	9.99830756	0.682730
32	0.00944007	9.02150150	0.08516362		32.00000000	1.07312500	9.68119880	0.704200
33	0.01927250	9.02037530	0.17384514		33.00000000	1.04060606	9.38665721	0.725563
34	0.02941900	9.03121950	0.26568942		34.00000000	1.01000000	9.12153170	0.746946
35	0.03925365	9.02240280	0.35416226		35.00000000	0.98114286	8.85226606	0.768438
36	0.04936592	9.02251820	0.44540490		36.00000000	0.95388889	8.60647986	0.789814
37	0.05921025	9.02020840	0.53408881		37.00000000	0.92810811	8.37172855	0.811172
38	0.06934708	9.03139970	0.62630116		38.00000000	0.90368421	8.16153331	0.832549
39	0.07951665	9.02140620	0.71735199		39.00000000	0.88051282	7.94346382	0.854026
40	0.08931037	9.02654840	0.80616438		40.00000000	0.85850000	7.74929180	0.875408
41	0.09942561	9.01948740	0.89676807		41.00000000	0.83756098	7.55437067	0.896765
42	0.10924687	9.01876830	0.98527221		42.00000000	0.81761905	7.37391675	0.918142
43	0.11938965	9.03003980	1.07809329		43.00000000	0.79860465	7.21143178	0.939625
44	0.12924144	9.02729130	1.16670013		44.00000000	0.78045455	7.04539053	0.960991
45	0.13938421	9.01936910	1.25715764		45.00000000	0.76311111	6.88278078	0.982332
46	0.14919877	9.03757100	1.34839448		46.00000000	0.74652174	6.74674322	1.003713
47	0.15933932	9.02965070	1.43877840		47.00000000	0.73063830	6.59740862	1.025187
48	0.16948135	9.03093720	1.53057543		48.00000000	0.71541667	6.46088299	1.046550
49	0.17929964	9.02350900	1.61791192		49.00000000	0.70081633	6.32382243	1.067918
50	0.18945655	9.01797010	1.70851350		50.00000000	0.68680000	6.19354186	1.089294
51	0.19923763	9.02846910	1.79881079		51.00000000	0.67333333	6.07916919	1.110774
52	0.20939529	9.01496120	1.88769041		52.00000000	0.66038462	5.95334168	1.132157
53	0.21920688	9.02801320	1.97900261		53.00000000	0.64792453	5.84947119	1.153501
54	0.22936305	9.03140640	2.07147092		54.00000000	0.63592593	5.74330548	1.174876
55	0.23916794	9.03245450	2.16027354		55.00000000	0.62436364	5.63953614	1.196375
56	0.24935091	9.02168370	2.24956504		56.00000000	0.61321429	5.53222533	1.217760
57	0.25947806	9.02586750	2.34201459		57.00000000	0.60245614	5.43768930	1.239122
58	0.26929858	9.02329540	2.42996064		58.00000000	0.59206897	5.34241317	1.260493
59	0.27946889	9.01666830	2.51987828		59.00000000	0.58203390	5.24800660	1.281969
60	0.28928941	9.02419850	2.61060506		60.00000000	0.57233333	5.16484961	1.303362
61	0.29943889	9.02798370	2.70332942		61.00000000	0.56295082	5.08231082	1.324743
62	0.30924302	9.01098630	2.78658462		62.00000000	0.55387097	4.99092370	1.346091
63	0.31940368	9.03126810	2.88462027		63.00000000	0.54507937	4.92275788	1.367568
64	0.32921228	9.02030180	2.96959412		64.00000000	0.53656250	4.83995568	1.388947
65	0.33937368	9.02033140	3.06126306		65.00000000	0.52830769	4.76551047	1.410332
66	0.34919271	9.02239610	3.15055494		66.00000000	0.52030303	4.69438003	1.431830
67	0.35934439	9.01989650	3.24124921		67.00000000	0.51253731	4.62303352	1.453199
68	0.36951324	9.01960560	3.33286369		68.00000000	0.50500000	4.55490083	1.474546
69	0.37931812	9.02083400	3.42176579		69.00000000	0.49768116	4.48949912	1.495922
70	0.38946611	9.02168370	3.51364006		70.00000000	0.49057143	4.42578026	1.517402
71	0.39928365	9.01910690	3.60118192		71.00000000	0.48366197	4.36219903	1.538790
72	0.40940559	8.99617290	3.68308347		72.00000000	0.47694444	4.29067469	1.560144
73	0.41923058	9.01837440	3.78077833		73.00000000	0.47041096	4.24234215	1.581524
74	0.42939270	9.02198220	3.87397330		74.00000000	0.46405405	4.18668742	1.602997
75	0.43921024	9.01341060	3.95878223		75.00000000	0.45786667	4.12694027	1.624377
76	0.44933218	9.01017000	4.04855933		76.00000000	0.45184211	4.07117418	1.645724
77	0.45950994	8.99973300	4.13546677		77.00000000	0.44597403	4.01364716	1.667100
78	0.46936321	9.00780680	4.22793311		78.00000000	0.44025641	3.96574469	1.688575
79	0.47947174	8.98764990	4.30932414		79.00000000	0.43468354	3.90678351	1.709953
80	0.48933098	8.98213770	4.39523824		80.00000000	0.42925000	3.85558261	1.731308
81	0.49947152	8.97427080	4.48239268		81.00000000	0.42395062	3.80464765	1.752680
82	0.50928086	8.94924740	4.55768041		82.00000000	0.41878049	3.74777019	1.774153
83	0.51940429	8.92660240	4.63651558		83.00000000	0.41373494	3.69324731	1.795542
84	0.52918762	8.88503550	4.70185079		84.00000000	0.40880952	3.63228713	1.816899
85	0.53934526	8.84269810	4.76926731		85.00000000	0.40400000	3.57245003	1.838273
86	0.54948658	8.74353500	4.80445514		86.00000000	0.39930233	3.49131386	1.859749
87	0.55929518	8.67298130	4.85075664		87.00000000	0.39471264	3.42333538	1.881129
88	0.56942308	8.48969170	4.83422640		88.00000000	0.39022727	3.31290924	1.902499
89	0.57922196	8.30030250	4.80771748		89.00000000	0.38584270	3.20261110	1.923859
90	0.58938116	8.00521950	4.71812555		90.00000000	0.38155556	3.05443597	1.945336
91	0.59919792	7.62604280	4.56950898		91.00000000	0.37736264	2.87778362	1.966720
92	0.60928637	7.10677530	4.33006132		92.00000000	0.37326087	2.65268113	1.988191
93	0.61909127	6.44888730	3.99244983		93.00000000	0.36924731	2.38123430	2.009564
94	0.62919760	5.58382940	3.51333206		94.00000000	0.36531915	2.03987980	2.031043
95	0.63933736	4.47030740	2.85803453		95.00000000	0.36147368	1.61589849	2.052419
96	0.64909983	3.13257810	2.03335591		96.00000000	0.35770833	1.12054929	2.073801
97	0.65921509	1.43984430	0.94916709		97.00000000	0.35402062	0.50973457	2.095300
98	0.66895968	-0.54083246	-0.36179511		98.00000000	0.35040816	-0.18951211	2.116679
99	0.67900199	-2.96460600	-2.01297337		99.00000000	0.34686869	-1.02832899	2.138088
100	0.68875700	-5.75465110	-3.96355623		100.00000000	0.34340000	-1.97614719	2.159475
101	0.69904417	-9.12473200	-6.37859071		101.00000000	0.34000000	-3.10240888	2.180961
14:34 02/04/2018
Test Lot:	JK-PERC
Recipe:	Recipe_YJX-LID
Cell Name:	1-30-40min
Test Order:	3
Test Condition:	Light
1	-0.29998735	9.04026510	-2.71196517		1.00000000	34.34000000	310.44270353	0.000000
2	-0.29011744	9.02184390	-2.61739426		2.00000000	17.17000000	154.90505976	0.021579
3	-0.28004730	9.03558350	-2.53039076		3.00000000	11.44666667	103.42731246	0.042972
4	-0.27024138	9.02600100	-2.43919897		4.00000000	8.58500000	77.48821859	0.064347
5	-0.26010352	9.02022460	-2.34619217		5.00000000	6.86800000	61.95090255	0.085726
6	-0.24994186	9.02740290	-2.25632587		6.00000000	5.72333333	51.66683593	0.107208
7	-0.24013297	9.03236290	-2.16896813		7.00000000	4.90571429	44.31019171	0.128576
8	-0.22999585	9.02491470	-2.07569293		8.00000000	4.29250000	38.73944635	0.149921
9	-0.22013858	9.02869800	-1.98756476		9.00000000	3.81555556	34.44949881	0.171304
10	-0.20999700	9.03242110	-1.89678133		10.00000000	3.43400000	31.01733406	0.192788
11	-0.20017099	9.02193550	-1.80592976		11.00000000	3.12181818	28.16484228	0.214167
12	-0.19003165	9.04278470	-1.71841530		12.00000000	2.86166667	25.87743555	0.235527
13	-0.18022500	9.01187710	-1.62416555		13.00000000	2.64153846	23.80521997	0.256905
14	-0.17008565	9.04286860	-1.53806218		14.00000000	2.45285714	22.18086484	0.278391
15	-0.16026783	9.01299670	-1.44449342		15.00000000	2.28933333	20.63375378	0.299782
16	-0.15014710	9.03610230	-1.35674456		16.00000000	2.14625000	19.39373456	0.321151
17	-0.13996680	9.00991440	-1.26108889		17.00000000	2.02000000	18.20002709	0.342515
18	-0.13013634	9.02967930	-1.17508942		18.00000000	1.90777778	17.22662151	0.363992
19	-0.11998061	9.03405860	-1.08391186		19.00000000	1.80736842	16.32787223	0.385364
20	-0.11017694	9.03079890	-0.99498579		20.00000000	1.71700000	15.50588171	0.406748
21	-0.10000261	9.03022000	-0.90304557		21.00000000	1.63523810	14.76655975	0.428104
22	-0.09019893	9.03018280	-0.81451280		22.00000000	1.56090909	14.09529443	0.449576
23	-0.08005288	9.02917190	-0.72281123		23.00000000	1.49304348	13.48094622	0.470964
24	-0.07019860	9.03321080	-0.63411872		24.00000000	1.43083333	12.92501912	0.492350
25	-0.06007711	9.00895690	-0.54123208		25.00000000	1.37360000	12.37470320	0.513822
26	-0.04992288	9.04314040	-0.45145958		26.00000000	1.32076923	11.94390159	0.535276
27	-0.04009687	9.01973630	-0.36166321		27.00000000	1.27185185	11.47176832	0.556655
28	-0.02996794	9.02102950	-0.27034170		28.00000000	1.22642857	11.06364832	0.578034
29	-0.02015310	9.03141120	-0.18201095		29.00000000	1.18413793	10.69443657	0.599392
30	-0.01000185	9.02560900	-0.09027275		30.00000000	1.14466667	10.33131377	0.620888
31	-0.00071023	9.01906680	-0.00640565		31.00000000	1.10774194	9.99079851	0.642386
32	0.00943635	9.02409840	0.08515455		32.00000000	1.07312500	9.68398560	0.663781
33	0.01925017	9.02676010	0.17376665		33.00000000	1.04060606	9.39330127	0.685143
34	0.02938253	9.02037810	0.26504152		34.00000000	1.01000000	9.11058188	0.706613
35	0.03921197	9.03645800	0.35433736		35.00000000	0.98114286	8.86605622	0.727994
36	0.04935178	9.01587770	0.44494959		36.00000000	0.95388889	8.60014556	0.749377
37	0.05918346	9.03169160	0.53452672		37.00000000	0.92810811	8.38238620	0.770736
38	0.06932922	9.01712890	0.62515049		38.00000000	0.90368421	8.14863701	0.792216
39	0.07947200	9.02342220	0.71710939		39.00000000	0.88051282	7.94523893	0.813597
40	0.08926572	9.01789670	0.80498903		40.00000000	0.85850000	7.74186432	0.834981
41	0.09940478	9.02107240	0.89673767		41.00000000	0.83756098	7.55569820	0.856473
42	0.10924315	9.02679730	0.98611577		42.00000000	0.81761905	7.38048141	0.877842
43	0.11940752	9.02473930	1.07762174		43.00000000	0.79860465	7.20719878	0.899206
44	0.12922804	9.02734470	1.16658606		44.00000000	0.78045455	7.04543220	0.920581
45	0.13938943	9.02366640	1.25780372		45.00000000	0.76311111	6.88606009	0.942065
46	0.14921068	9.02499960	1.34662633		46.00000000	0.74652174	6.73735840	0.963455
47	0.15935941	9.02559850	1.43831405		47.00000000	0.73063830	6.59444793	0.984799
48	0.16949177	9.01440720	1.52786783		48.00000000	0.71541667	6.44905715	1.006182
49	0.17929442	9.03524020	1.61996815		49.00000000	0.70081633	6.33204385	1.027660
50	0.18947814	9.02347760	1.70975175		50.00000000	0.68680000	6.19732442	1.049042
51	0.19924432	9.02810860	1.79879936		51.00000000	0.67333333	6.07892646	1.070393
52	0.20939678	9.01992990	1.88874428		52.00000000	0.66038462	5.95662294	1.091769
53	0.21923517	9.02927210	1.97953400		53.00000000	0.64792453	5.85028687	1.113243
54	0.22936156	9.01579090	2.06787587		54.00000000	0.63592593	5.73337518	1.134631
55	0.23921037	9.01992990	2.15766077		55.00000000	0.62436364	5.63171623	1.155970
56	0.24935985	9.02437400	2.25031655		56.00000000	0.61321429	5.53387506	1.177342
57	0.25949073	9.02005290	2.34062011		57.00000000	0.60245614	5.43418626	1.198826
58	0.26929560	9.01542190	2.42781345		58.00000000	0.59206897	5.33775152	1.220194
59	0.27947113	9.03600220	2.52530175		59.00000000	0.58203390	5.25925959	1.241531
60	0.28929090	9.01947590	2.60925230		60.00000000	0.57233333	5.16214671	1.262919
61	0.29943517	9.02555370	2.70256821		61.00000000	0.56295082	5.08094285	1.284395
62	0.30924228	9.01507950	2.78784374		62.00000000	0.55387097	4.99319081	1.305775
63	0.31939846	9.02420040	2.88231571		63.00000000	0.54507937	4.91890542	1.327151
64	0.32923311	9.01923850	2.96943194		64.00000000	0.53656250	4.83938516	1.348510
65	0.33934987	9.02756120	3.06350172		65.00000000	0.52830769	4.76933002	1.369981
66	0.34919122	9.02412700	3.15114592		66.00000000	0.52030303	4.69528062	1.391359
67	0.35933399	9.01847460	3.24064446		67.00000000	0.51253731	4.62230474	1.412741
68	0.36949983	9.02333070	3.33411916		68.00000000	0.50500000	4.55678200	1.434101
69	0.37933525	9.02235790	3.42249839		69.00000000	0.49768116	4.49025754	1.455583
70	0.38945791	9.02428050	3.51457742		70.00000000	0.49057143	4.42705418	1.476952
71	0.39928290	9.01331420	3.59886223		71.00000000	0.48366197	4.35939732	1.498353
72	0.40943015	9.02610970	3.69556145		72.00000000	0.47694444	4.30495288	1.519830
73	0.41924620	9.01340770	3.77883693		73.00000000	0.47041096	4.24000576	1.541194
74	0.42939046	9.01803020	3.87225614		74.00000000	0.46405405	4.18485347	1.562559
75	0.43921545	9.01117800	3.95784860		75.00000000	0.45786667	4.12591803	1.583930
76	0.44933665	9.01322080	4.04997044		76.00000000	0.45184211	4.07255266	1.605411
77	0.45951590	8.99941730	4.13537534		77.00000000	0.44597403	4.01350636	1.626803
78	0.46936470	9.00885960	4.22844068		78.00000000	0.44025641	3.96620819	1.648147
79	0.47951046	8.98806760	4.30987243		79.00000000	0.43468354	3.90696508	1.669515
80	0.48942068	8.98661140	4.39823346		80.00000000	0.42925000	3.85750294	1.691001
81	0.49955660	8.97987370	4.48595517		81.00000000	0.42395062	3.80702300	1.752626
82	0.50934792	8.94873240	4.55801823		82.00000000	0.41878049	3.74755452	1.774099
83	0.51950467	8.91699120	4.63241857		83.00000000	0.41373494	3.68927082	1.795495
84	0.52928412	8.88156890	4.70087338		84.00000000	0.40880952	3.63086995	1.816845
85	0.53941631	8.83851620	4.76763979		85.00000000	0.40400000	3.57076054	1.838216
86	0.54959989	8.75207520	4.81013957		86.00000000	0.39930233	3.49472398	1.859701
87	0.55939937	8.64847850	4.83795342		87.00000000	0.39471264	3.41366381	1.881069
88	0.56952786	8.48230740	4.83091038		88.00000000	0.39022727	3.31002768	1.902416
89	0.57933706	8.28536510	4.80001906		89.00000000	0.38584270	3.19684761	1.923786
90	0.58945513	7.99697830	4.71385988		90.00000000	0.38155556	3.05129150	1.945268
91	0.59923750	7.62624930	4.56993456		91.00000000	0.37736264	2.87786155	1.966637
92	0.60936970	7.09044840	4.32070441		92.00000000	0.37326087	2.64658694	1.988098
93	0.61917669	6.45118050	3.99442059		93.00000000	0.36924731	2.38208106	2.009546
94	0.62927318	5.55391220	3.49492799		94.00000000	0.36531915	2.02895048	2.031052
95	0.63939792	4.46366930	2.85406087		95.00000000	0.36147368	1.61349899	2.052435
96	0.64918327	3.11774020	2.02398478		96.00000000	0.35770833	1.11524165	2.073832
97	0.65932810	1.42330380	0.93842419		97.00000000	0.35402062	0.50387889	2.095204
98	0.66904134	-0.54523283	-0.36478330		98.00000000	0.35040816	-0.19105403	2.116681
99	0.67911100	-2.96207930	-2.01158064		99.00000000	0.34686869	-1.02745256	2.138057
100	0.68882942	-5.73226400	-3.94855209		100.00000000	0.34340000	-1.96845946	2.159442
101	0.69911861	-9.05642800	-6.33151735		101.00000000	0.34000000	-3.07918552	2.180797
14:34 02/04/2018
Test Lot:	JK-PERC
Recipe:	Recipe_YJX-LID
Cell Name:	1-30-40min
Test Order:	4
Test Condition:	Light
1	-0.29990140	9.02666660	-2.70710995		1.00000000	34.34000000	309.97573104	0.000000
2	-0.29006884	9.02807520	-2.61876330		2.00000000	17.17000000	155.01205118	0.021519
3	-0.27992520	9.02618220	-2.52665586		3.00000000	11.44666667	103.31969892	0.042891
4	-0.27012762	9.01931860	-2.43636707		4.00000000	8.58500000	77.43085018	0.064282
5	-0.26001003	9.02752400	-2.34724679		5.00000000	6.86800000	62.00103483	0.085819
6	-0.24983065	9.02256770	-2.25411395		6.00000000	5.72333333	51.63916247	0.107221
7	-0.23997353	9.03661440	-2.16854826		7.00000000	4.90571429	44.33104836	0.128592
8	-0.22983733	9.02037140	-2.07321808		8.00000000	4.29250000	38.71994423	0.149965
9	-0.22002265	9.03215890	-1.98727954		9.00000000	3.81555556	34.46270407	0.171479
10	-0.20989686	9.02686500	-1.89471062		10.00000000	3.43400000	30.99825441	0.192880
11	-0.20004198	9.02920150	-1.80621935		11.00000000	3.12181818	28.18752541	0.214240
12	-0.18990429	9.03308490	-1.71542157		12.00000000	2.86166667	25.84967796	0.235624
13	-0.18013202	9.01590540	-1.62405325		13.00000000	2.64153846	23.81586088	0.257099
14	-0.16999432	9.03641800	-1.53613973		14.00000000	2.45285714	22.16504244	0.278464
15	-0.16016029	9.02553650	-1.44553254		15.00000000	2.28933333	20.66246156	0.299815
16	-0.15002409	9.03520580	-1.35549853		16.00000000	2.14625000	19.39181045	0.321188
17	-0.13989383	9.02376940	-1.26236966		17.00000000	2.02000000	18.22801419	0.342662
18	-0.13003673	9.02442360	-1.17350654		18.00000000	1.90777778	17.21659480	0.364047
19	-0.11991019	9.02310470	-1.08196220		19.00000000	1.80736842	16.30807449	0.385386
20	-0.11010890	9.02234080	-0.99344002		20.00000000	1.71700000	15.49135915	0.406759
21	-0.09992282	9.01948360	-0.90125225		21.00000000	1.63523810	14.74900318	0.428245
22	-0.09010070	9.03174020	-0.81376610		22.00000000	1.56090909	14.09772538	0.449616
23	-0.07996895	9.01837730	-0.72119018		23.00000000	1.49304348	13.46482941	0.470958
24	-0.07013790	9.03137110	-0.63344137		24.00000000	1.43083333	12.92238682	0.492336
25	-0.06000838	9.03079700	-0.54192353		25.00000000	1.37360000	12.40470276	0.513822
26	-0.04985804	9.01823520	-0.44963150		26.00000000	1.32076923	11.91100757	0.535204
27	-0.04002475	9.01815510	-0.36094937		27.00000000	1.27185185	11.46975726	0.556553
28	-0.02991831	9.01895810	-0.26983196		28.00000000	1.22642857	11.06110790	0.577930
29	-0.02006194	9.02529430	-0.18106495		29.00000000	1.18413793	10.68719332	0.599397
30	-0.00992052	9.03352260	-0.08961728		30.00000000	1.14466667	10.34037220	0.620779
31	-0.00060599	9.02422140	-0.00546859		31.00000000	1.10774194	9.99650848	0.642270
32	0.00954266	9.02243420	0.08609805		32.00000000	1.07312500	9.68219970	0.663622
33	0.01938088	9.03893470	0.17518253		33.00000000	1.04060606	9.40597023	0.685113
34	0.02945652	9.01485730	0.26554632		34.00000000	1.01000000	9.10500587	0.706482
35	0.03934163	9.03723530	0.35553952		35.00000000	0.98114286	8.86681886	0.727879
36	0.04947234	9.02756600	0.44661478		36.00000000	0.95388889	8.61129490	0.749290
37	0.05928228	9.02793310	0.53519643		37.00000000	0.92810811	8.37889791	0.770759
38	0.06944871	9.02536960	0.62680027		38.00000000	0.90368421	8.15608400	0.792135
39	0.07958017	9.03020760	0.71862541		39.00000000	0.88051282	7.95121356	0.813498
40	0.08939681	9.01937200	0.80630304		40.00000000	0.85850000	7.74313086	0.834861
41	0.09954314	9.02848910	0.89872415		41.00000000	0.83756098	7.56191014	0.856339
42	0.10933745	9.02322480	0.98657639		42.00000000	0.81761905	7.37756047	0.877716
43	0.11948900	9.03254410	1.07928966		43.00000000	0.79860465	7.21343173	0.899088
44	0.12934582	9.01629260	1.16621976		44.00000000	0.78045455	7.03680654	0.920455
45	0.13950333	9.03020290	1.25974338		45.00000000	0.76311111	6.89104817	0.941935
46	0.14929242	9.01521590	1.34590340		46.00000000	0.74652174	6.73005465	0.963314
47	0.15943952	9.02449700	1.43886147		47.00000000	0.73063830	6.59364313	0.984703
48	0.16959180	9.02673820	1.53086078		48.00000000	0.71541667	6.45787895	1.006051
49	0.17939951	9.02449040	1.61898916		49.00000000	0.70081633	6.32451021	1.027522
50	0.18955851	9.01903150	1.70963417		50.00000000	0.68680000	6.19427083	1.048900
51	0.19934462	9.03073220	1.80022788		51.00000000	0.67333333	6.08069301	1.070272
52	0.20946194	9.02801800	1.89102616		52.00000000	0.66038462	5.96196419	1.091765
53	0.21929346	9.01570700	1.97708558		53.00000000	0.64792453	5.84149771	1.113162
54	0.22945990	9.02643300	2.07120441		54.00000000	0.63592593	5.74014276	1.134573
55	0.23927133	9.01192190	2.15629454		55.00000000	0.62436364	5.62671633	1.155963
56	0.24941692	9.03302670	2.25298970		56.00000000	0.61321429	5.53918102	1.177457
57	0.25956327	9.02642440	2.34292823		57.00000000	0.60245614	5.43802481	1.198833
58	0.26939479	9.02752400	2.43196793		58.00000000	0.59206897	5.34491680	1.220185
59	0.27952772	9.02251910	2.52204419		59.00000000	0.58203390	5.25141196	1.241558
60	0.28937265	9.02721880	2.61223023		60.00000000	0.57233333	5.16657823	1.263045
61	0.29948920	9.01944830	2.70122736		61.00000000	0.56295082	5.07750581	1.284430
62	0.30930510	9.01609900	2.78872540		62.00000000	0.55387097	4.99375548	1.305772
63	0.31949386	9.02701000	2.88407427		63.00000000	0.54507937	4.92043688	1.327156
64	0.32930306	9.02732560	2.97272594		64.00000000	0.53656250	4.84372439	1.348642
65	0.33945686	9.02927020	3.06504771		65.00000000	0.52830769	4.77023290	1.370013
66	0.34925413	9.00249390	3.14415817		66.00000000	0.52030303	4.68402486	1.391369
67	0.35942057	9.03616050	3.24778196		67.00000000	0.51253731	4.63136943	1.412745
68	0.36958477	9.02580830	3.33580128		68.00000000	0.50500000	4.55803319	1.434278
69	0.37941852	9.00286100	3.41585220		69.00000000	0.49768116	4.48055430	1.455664
70	0.38956040	9.02942850	3.51750778		70.00000000	0.49057143	4.42957964	1.477016
71	0.39937404	9.01903440	3.60196821		71.00000000	0.48366197	4.36216396	1.498389
72	0.40950701	9.02208040	3.69460517		72.00000000	0.47694444	4.30303112	1.519871
73	0.41934669	9.01353740	3.77979707		73.00000000	0.47041096	4.24006677	1.541246
74	0.42950496	9.01615240	3.87248218		74.00000000	0.46405405	4.18398207	1.562624
75	0.43932605	9.01394460	3.96006068		75.00000000	0.45786667	4.12718477	1.583983
76	0.44946793	9.01617430	4.05248120		76.00000000	0.45184211	4.07388718	1.605463
77	0.45958972	9.00349520	4.13791384		77.00000000	0.44597403	4.01532500	1.626845
78	0.46943387	9.00221350	4.22594392		78.00000000	0.44025641	3.96328220	1.648223
79	0.47960851	8.98606200	4.30979181		79.00000000	0.43468354	3.90609328	1.669571
80	0.48940653	8.98381420	4.39673733		80.00000000	0.42925000	3.85630225	1.691045
81	0.49953872	8.97239880	4.48206061		81.00000000	0.42395062	3.80385401	1.712432
82	0.50936282	8.95093150	4.55927171		82.00000000	0.41878049	3.74847546	1.733827
83	0.51950246	8.93878560	4.64372111		83.00000000	0.41373494	3.69828792	1.755305
84	0.52928561	8.87108610	4.69533822		84.00000000	0.40880952	3.62658448	1.776683
85	0.53941256	8.82938190	4.76267949		85.00000000	0.40400000	3.56707029	1.798032
86	0.54956937	8.75668140	4.81240388		86.00000000	0.39930233	3.49656325	1.819412
87	0.55939567	8.64877890	4.83808947		87.00000000	0.39471264	3.41378238	1.840890
88	0.56950778	8.49747280	4.83937687		88.00000000	0.39022727	3.31594564	1.862290
89	0.57930505	8.28514480	4.79962622		89.00000000	0.38584270	3.19676261	1.883642
90	0.58944023	7.99645330	4.71343127		90.00000000	0.38155556	3.05109118	1.905016
91	0.59924495	7.62647630	4.57012741		91.00000000	0.37736264	2.87794721	1.926499
92	0.60935706	7.09549760	4.32369156		92.00000000	0.37326087	2.64847160	1.947873
93	0.61917889	6.43872550	3.98672291		93.00000000	0.36924731	2.37748208	1.969209
94	0.62928653	5.57108690	3.50580994		94.00000000	0.36531915	2.03522472	1.990683
95	0.63938522	4.45579150	2.84896723		95.00000000	0.36147368	1.61065137	2.012182
96	0.64918554	3.11848330	2.02447427		96.00000000	0.35770833	1.11550746	2.033567
97	0.65930802	1.41591810	0.93352616		97.00000000	0.35402062	0.50126420	2.054918
98	0.66903836	-0.55519515	-0.37144685		98.00000000	0.35040816	-0.19454491	2.076297
99	0.67910653	-2.99146990	-2.03152674		99.00000000	0.34686869	-1.03764724	2.097786
100	0.68885916	-5.77306990	-3.97683208		100.00000000	0.34340000	-1.98247220	2.119170
101	0.69912684	-9.13911440	-6.38940017		101.00000000	0.34000000	-3.10729890	2.140523
