# Supplementary material for: Study on the Electrical Injection Regeneration of Industrialized B-Doped Czochralski Silicon PERC Solar Cells
Source: Hindawi journal article supplement (doi:10.1155/2019/5357370), 2019-06-20
Supplement: f1 [file 5357370.f1.zip › section3.2/IVRawData_1-30-50min.csv]

15:07 02/04/2018
Test Lot:	JK-PERC
Recipe:	Recipe_YJX-LID
Cell Name:	1-30-50min
Test Order:	2
Test Condition:	Light
1	-0.29990777	9.01376150	-2.70329711		1.00000000	34.34000000	309.53256991	0.000000
2	-0.29009211	9.01059720	-2.61390315		2.00000000	17.17000000	154.71195392	0.061803
3	-0.27998316	9.01903820	-2.52517882		3.00000000	11.44666667	103.23792393	0.083237
4	-0.27018163	9.00180240	-2.43212165		4.00000000	8.58500000	77.28047360	0.104742
5	-0.25999528	9.01068590	-2.34273580		5.00000000	6.86800000	61.88539076	0.126219
6	-0.24985434	9.00883670	-2.25089695		6.00000000	5.72333333	51.56057538	0.147615
7	-0.24006546	9.00249290	-2.16118760		7.00000000	4.90571429	44.16365803	0.169006
8	-0.22988358	9.01628300	-2.07269541		8.00000000	4.29250000	38.70239478	0.190498
9	-0.22004928	9.00492670	-1.98152764		9.00000000	3.81555556	34.35879810	0.211890
10	-0.20990835	9.01059720	-1.89139959		10.00000000	3.43400000	30.94239078	0.233249
11	-0.20010158	9.01250650	-1.80341679		11.00000000	3.12181818	28.13540666	0.254623
12	-0.18994577	9.01620960	-1.71259087		12.00000000	2.86166667	25.80138647	0.276099
13	-0.18015093	9.01010800	-1.62317934		13.00000000	2.64153846	23.80054682	0.297473
14	-0.17000328	9.00952240	-1.53164836		14.00000000	2.45285714	22.09907137	0.318854
15	-0.16019876	9.01187420	-1.44369107		15.00000000	2.28933333	20.63118400	0.340208
16	-0.15003996	9.01757140	-1.35299605		16.00000000	2.14625000	19.35396262	0.361707
17	-0.13989680	9.01818080	-1.26161464		17.00000000	2.02000000	18.21672522	0.383101
18	-0.13006920	9.01678370	-1.17280584		18.00000000	1.90777778	17.20201957	0.404492
19	-0.11990295	9.00031570	-1.07916440		19.00000000	1.80736842	16.26688638	0.425886
20	-0.11006866	9.01087570	-0.99181501		20.00000000	1.71700000	15.47167358	0.447361
21	-0.09991879	9.01050380	-0.90031864		21.00000000	1.63523810	14.73431907	0.468747
22	-0.09011874	9.00777530	-0.81176932		22.00000000	1.56090909	14.06031835	0.490129
23	-0.07995249	9.01993750	-0.72116649		23.00000000	1.49304348	13.46715886	0.511603
24	-0.07017551	9.00868320	-0.63218890		24.00000000	1.43083333	12.88992421	0.532994
25	-0.06000182	9.00993820	-0.54061269		25.00000000	1.37360000	12.37605111	0.554333
26	-0.04985791	9.00070290	-0.44875621		26.00000000	1.32076923	11.88785145	0.575703
27	-0.04003850	9.00738810	-0.36064231		27.00000000	1.27185185	11.45606324	0.597188
28	-0.02989086	9.00104330	-0.26904893		28.00000000	1.22642857	11.03913668	0.618554
29	-0.02002754	9.02696040	-0.18078783		29.00000000	1.18413793	10.68916621	0.639919
30	-0.00988809	9.00821400	-0.08907405		30.00000000	1.14466667	10.31140229	0.661292
31	-0.00066040	9.01083950	-0.00595072		31.00000000	1.10774194	9.98168479	0.682889
32	0.00946843	9.00871470	0.08529836		32.00000000	1.07312500	9.66747696	0.704285
33	0.01930393	9.00632860	0.17385751		33.00000000	1.04060606	9.37204012	0.725638
34	0.02943118	9.00698570	0.26508623		34.00000000	1.01000000	9.09705556	0.747011
35	0.03924435	9.01419350	0.35375620		35.00000000	0.98114286	8.84421157	0.768497
36	0.04939021	9.00505160	0.44476141		36.00000000	0.95388889	8.58981867	0.789871
37	0.05921380	9.00948430	0.53348582		37.00000000	0.92810811	8.36177543	0.811221
38	0.06937753	9.00993160	0.62508677		38.00000000	0.90368421	8.14213292	0.832608
39	0.07951892	9.00853920	0.71634933		39.00000000	0.88051282	7.93213426	0.854131
40	0.08933656	9.01161000	0.80506623		40.00000000	0.85850000	7.73646719	0.875537
41	0.09944595	9.00466630	0.89547757		41.00000000	0.83756098	7.54195709	0.896894
42	0.10932015	9.00771520	0.98472478		42.00000000	0.81761905	7.36487952	0.918274
43	0.11945261	9.00510500	1.07568330		43.00000000	0.79860465	7.19151874	0.939754
44	0.12925686	9.00926020	1.16450868		44.00000000	0.78045455	7.03131807	0.961122
45	0.13941611	9.00320240	1.25519146		45.00000000	0.76311111	6.87044379	0.982484
46	0.14924343	9.00495340	1.34393013		46.00000000	0.74652174	6.72239347	1.003853
47	0.15935877	9.00616460	1.43521131		47.00000000	0.73063830	6.58024877	1.025342
48	0.16951059	9.00472450	1.52639616		48.00000000	0.71541667	6.44212999	1.046713
49	0.17932153	9.00718120	1.61518151		49.00000000	0.70081633	6.31237964	1.068106
50	0.18949269	9.00561240	1.70649772		50.00000000	0.68680000	6.18505460	1.089446
51	0.19929841	9.00749970	1.79518037		51.00000000	0.67333333	6.06504980	1.110918
52	0.20944874	9.01185700	1.88752209		52.00000000	0.66038462	5.95129172	1.132317
53	0.21927531	9.00708100	1.97503048		53.00000000	0.64792453	5.83590871	1.153700
54	0.22942787	9.01029010	2.06721167		54.00000000	0.63592593	5.72987707	1.175203
55	0.23926561	9.01206400	2.15627699		55.00000000	0.62436364	5.62680505	1.196575
56	0.24936010	8.99763200	2.24365042		56.00000000	0.61321429	5.51747648	1.217928
57	0.25953126	9.01224140	2.33895837		57.00000000	0.60245614	5.42948017	1.239306
58	0.26934296	9.00387670	2.42513080		58.00000000	0.59206897	5.33091596	1.260785
59	0.27948436	9.00557040	2.51691608		59.00000000	0.58203390	5.24154725	1.282164
60	0.28932655	9.00567050	2.60557958		60.00000000	0.57233333	5.15424542	1.303521
61	0.29943892	9.00939750	2.69776426		61.00000000	0.56295082	5.07184771	1.324899
62	0.30928335	9.01205440	2.78727838		62.00000000	0.55387097	4.99151529	1.346389
63	0.31944856	8.99943450	2.87485639		63.00000000	0.54507937	4.90540604	1.367775
64	0.32925579	9.00641160	2.96541317		64.00000000	0.53656250	4.83250272	1.389125
65	0.33939195	8.99963950	3.05440520		65.00000000	0.52830769	4.75457878	1.410503
66	0.34926021	9.01278880	3.14780851		66.00000000	0.52030303	4.68938132	1.432002
67	0.35934949	9.00584410	3.23624548		67.00000000	0.51253731	4.61583114	1.453377
68	0.36951917	8.98273370	3.31929230		68.00000000	0.50500000	4.53628052	1.474731
69	0.37934202	9.00943760	3.41765826		69.00000000	0.49768116	4.48382735	1.496102
70	0.38945514	8.99149700	3.50178472		70.00000000	0.49057143	4.41097153	1.517581
71	0.39929658	9.00797180	3.59685233		71.00000000	0.48366197	4.35681340	1.538975
72	0.40945658	8.99425220	3.68275575		72.00000000	0.47694444	4.28975862	1.560321
73	0.41927797	9.00488000	3.77554781		73.00000000	0.47041096	4.23599424	1.581690
74	0.42944688	8.99527360	3.86299218		74.00000000	0.46405405	4.17429318	1.603166
75	0.43924218	8.99655530	3.95166656		75.00000000	0.45786667	4.11922279	1.624550
76	0.44939253	8.99404910	4.04185848		76.00000000	0.45184211	4.06389008	1.645922
77	0.45956367	8.99050240	4.13170828		77.00000000	0.44597403	4.00953055	1.667294
78	0.46938726	8.98038100	4.21527643		78.00000000	0.44025641	3.95367030	1.688770
79	0.47954506	8.98162270	4.30709280		79.00000000	0.43468354	3.90416359	1.710145
80	0.48936641	8.96288780	4.38613623		80.00000000	0.42925000	3.84731959	1.731527
81	0.49951151	8.95712180	4.47418544		81.00000000	0.42395062	3.79737732	1.752879
82	0.50930756	8.92473130	4.54543312		82.00000000	0.41878049	3.73750333	1.774353
83	0.51945192	8.90869520	4.62763883		83.00000000	0.41373494	3.68583847	1.795724
84	0.52924949	8.87284280	4.69594753		84.00000000	0.40880952	3.62730264	1.817105
85	0.53937674	8.80591490	4.74970567		85.00000000	0.40400000	3.55758962	1.838597
86	0.54954714	8.73429970	4.79990942		86.00000000	0.39930233	3.48762618	1.859980
87	0.55936033	8.62136750	4.82245097		87.00000000	0.39471264	3.40296276	1.881342
88	0.56946975	8.47913930	4.82861334		88.00000000	0.39022727	3.30879140	1.902727
89	0.57929778	8.26094440	4.78554675		89.00000000	0.38584270	3.18742506	1.924222
90	0.58940274	7.97309730	4.69936539		90.00000000	0.38155556	3.04217957	1.945611
91	0.59920841	7.58853340	4.54711303		91.00000000	0.37736264	2.86362898	1.966971
92	0.60933566	7.07685900	4.31218255		92.00000000	0.37326087	2.64151454	1.988433
93	0.61911535	6.39788580	3.96102931		93.00000000	0.36924731	2.36240213	2.009936
94	0.62923962	5.52712150	3.47788383		94.00000000	0.36531915	2.01916332	2.031321
95	0.63935798	4.40948630	2.81924025		95.00000000	0.36147368	1.59391326	2.052666
96	0.64913172	3.09415560	2.00851455		96.00000000	0.35770833	1.10680524	2.074041
97	0.65924478	1.42118390	0.93690807		97.00000000	0.35402062	0.50312840	2.095529
98	0.66895747	-0.53845143	-0.36020111		98.00000000	0.35040816	-0.18867778	2.116911
99	0.67904085	-2.91414550	-1.97882384		99.00000000	0.34686869	-1.01082582	2.138320
100	0.68880862	-5.62258580	-3.87288557		100.00000000	0.34340000	-1.93079596	2.159716
101	0.69908845	-8.87928580	-6.20740615		101.00000000	0.34000000	-3.01895717	2.181209
15:08 02/04/2018
Test Lot:	JK-PERC
Recipe:	Recipe_YJX-LID
Cell Name:	1-30-50min
Test Order:	3
Test Condition:	Light
1	-0.29998964	8.99895000	-2.69959177		1.00000000	34.34000000	309.02394300	0.000000
2	-0.29008317	9.00889490	-2.61332879		2.00000000	17.17000000	154.68272543	0.021584
3	-0.27995488	9.00475980	-2.52092645		3.00000000	11.44666667	103.07448384	0.042986
4	-0.27019352	9.00111960	-2.43204419		4.00000000	8.58500000	77.27461177	0.064345
5	-0.26001239	9.00473790	-2.34134342		5.00000000	6.86800000	61.84453990	0.085716
6	-0.24986848	9.01231480	-2.25189340		6.00000000	5.72333333	51.58048171	0.107240
7	-0.24006397	9.00653360	-2.16214421		7.00000000	4.90571429	44.18348055	0.128629
8	-0.22988804	9.00691890	-2.07058293		8.00000000	4.29250000	38.66219938	0.150030
9	-0.22003292	9.00862120	-1.98219323		9.00000000	3.81555556	34.37289467	0.171429
10	-0.20990983	9.00323770	-1.88986810		10.00000000	3.43400000	30.91711826	0.192915
11	-0.20008075	9.01176360	-1.80308042		11.00000000	3.12181818	28.13308746	0.214284
12	-0.18992791	9.00412560	-1.71013476		12.00000000	2.86166667	25.76680609	0.235650
13	-0.18014795	9.00927350	-1.62300215		13.00000000	2.64153846	23.79834246	0.257027
14	-0.16998021	8.99952600	-1.52974132		14.00000000	2.45285714	22.07455163	0.278508
15	-0.16016974	9.01671700	-1.44420522		15.00000000	2.28933333	20.64227079	0.299883
16	-0.15003996	9.00626660	-1.35129988		16.00000000	2.14625000	19.32969969	0.321226
17	-0.13989605	9.00820920	-1.26021288		17.00000000	2.02000000	18.19658258	0.342599
18	-0.13008185	9.00202940	-1.17100064		18.00000000	1.90777778	17.17387164	0.364075
19	-0.11989923	9.00476650	-1.07966457		19.00000000	1.80736842	16.27493061	0.385457
20	-0.11008132	9.00338080	-0.99110404		20.00000000	1.71700000	15.45880483	0.406834
21	-0.09992921	9.00715920	-0.90007834		21.00000000	1.63523810	14.72884985	0.428200
22	-0.09013734	9.01118660	-0.81224439		22.00000000	1.56090909	14.06564308	0.449679
23	-0.07996961	9.01096250	-0.72060313		23.00000000	1.49304348	13.45375879	0.471069
24	-0.07015765	9.00444600	-0.63173074		24.00000000	1.43083333	12.88386149	0.492454
25	-0.06004201	9.00418190	-0.54062920		25.00000000	1.37360000	12.36814426	0.513811
26	-0.04986014	9.01185040	-0.44933210		26.00000000	1.32076923	11.90257472	0.535287
27	-0.04003850	9.00044060	-0.36036414		27.00000000	1.27185185	11.44722704	0.556663
28	-0.02988640	9.01168350	-0.26932675		28.00000000	1.22642857	11.05218612	0.578084
29	-0.02008188	8.99632550	-0.18066309		29.00000000	1.18413793	10.65289026	0.599563
30	-0.00995210	9.00531860	-0.08962184		30.00000000	1.14466667	10.30808802	0.620937
31	-0.00071175	9.00380330	-0.00640848		31.00000000	1.10774194	9.97389049	0.642427
32	0.00945577	9.00289540	0.08512935		32.00000000	1.07312500	9.66123213	0.663808
33	0.01926671	9.00505830	0.17349787		33.00000000	1.04060606	9.37071824	0.685285
34	0.02940736	9.00808720	0.26490409		34.00000000	1.01000000	9.09816807	0.706673
35	0.03924659	9.00870610	0.35356095		35.00000000	0.98114286	8.83882764	0.728019
36	0.04940510	8.99578950	0.44443786		36.00000000	0.95388889	8.58098365	0.749387
37	0.05919669	9.00915050	0.53331184		37.00000000	0.92810811	8.36146563	0.770861
38	0.06936413	9.00339130	0.62451240		38.00000000	0.90368421	8.13622256	0.792251
39	0.07950924	9.00131510	0.71568775		39.00000000	0.88051282	7.92577335	0.813591
40	0.08933581	9.02679350	0.80641595		40.00000000	0.85850000	7.74950222	0.834973
41	0.09944669	8.99606510	0.89462892		41.00000000	0.83756098	7.53475306	0.856462
42	0.10932164	9.01212790	0.98522060		42.00000000	0.81761905	7.36848743	0.877839
43	0.11947122	8.99564740	1.07472097		43.00000000	0.79860465	7.18396585	0.899208
44	0.12928663	9.00640200	1.16440736		44.00000000	0.78045455	7.02908738	0.920586
45	0.13944291	8.99420260	1.25417778		45.00000000	0.76311111	6.86357594	0.942047
46	0.14925161	9.00708580	1.34432206		46.00000000	0.74652174	6.72398536	0.963408
47	0.15940194	9.00806710	1.43590337		47.00000000	0.73063830	6.58163881	0.984757
48	0.16954036	9.00844290	1.52729465		48.00000000	0.71541667	6.44479019	1.006139
49	0.17938180	8.99628540	1.61376987		49.00000000	0.70081633	6.30474369	1.027614
50	0.18950310	9.01105310	1.70762250		50.00000000	0.68680000	6.18879127	1.048989
51	0.19930810	9.00051400	1.79387534		51.00000000	0.67333333	6.06034609	1.070359
52	0.20941228	9.00378130	1.88550237		52.00000000	0.66038462	5.94595865	1.091717
53	0.21928053	9.00314710	1.97421487		53.00000000	0.64792453	5.83335984	1.113191
54	0.22940628	9.00085260	2.06485211		54.00000000	0.63592593	5.72387552	1.134572
55	0.23921871	8.99545760	2.15188176		55.00000000	0.62436364	5.61643662	1.155961
56	0.24941146	9.01271150	2.24787353		56.00000000	0.61321429	5.52672344	1.177304
57	0.25952384	8.99239350	2.33374049		57.00000000	0.60245614	5.41752268	1.198783
58	0.26933998	9.00941560	2.42659582		58.00000000	0.59206897	5.33419537	1.220158
59	0.27947244	8.99506190	2.51387190		59.00000000	0.58203390	5.23543094	1.241549
60	0.28926924	9.01603790	2.60806243		60.00000000	0.57233333	5.16017902	1.263036
61	0.29944116	9.00301360	2.69587284		61.00000000	0.56295082	5.06825389	1.284422
62	0.30925059	9.00438400	2.78461106		62.00000000	0.55387097	4.98726688	1.305790
63	0.31939870	9.00217630	2.87528341		63.00000000	0.54507937	4.90690054	1.327170
64	0.32925206	8.99736500	2.96240096		64.00000000	0.53656250	4.82764866	1.348648
65	0.33936146	9.01947020	3.06086058		65.00000000	0.52830769	4.76505549	1.370031
66	0.34921035	8.99484160	3.14109178		66.00000000	0.52030303	4.68004334	1.391409
67	0.35935619	9.00041580	3.23435513		67.00000000	0.51253731	4.61304893	1.412791
68	0.36952513	8.99692250	3.32458896		68.00000000	0.50500000	4.54344586	1.434273
69	0.37933311	8.99806210	3.41326288		69.00000000	0.49768116	4.47816598	1.455650
70	0.38949609	8.99173070	3.50224395		70.00000000	0.49057143	4.41108617	1.476993
71	0.39931148	8.99534700	3.59194532		71.00000000	0.48366197	4.35070727	1.498371
72	0.40945363	8.99579810	3.68336219		72.00000000	0.47694444	4.29049593	1.519848
73	0.41929507	8.99687390	3.77234487		73.00000000	0.47041096	4.23222808	1.541233
74	0.42943200	8.99184230	3.86138482		74.00000000	0.46405405	4.17270087	1.562575
75	0.43923846	8.99036600	3.94891452		75.00000000	0.45786667	4.11638891	1.583953
76	0.44942304	8.99404910	4.04213289		76.00000000	0.45184211	4.06389008	1.605427
77	0.45956516	8.98268890	4.12813086		77.00000000	0.44597403	4.00604593	1.626821
78	0.46938875	8.97825340	4.21429114		78.00000000	0.44025641	3.95273361	1.648185
79	0.47956514	8.97541430	4.30429582		79.00000000	0.43468354	3.90146490	1.669561
80	0.48937309	8.96265130	4.38608036		80.00000000	0.42925000	3.84721807	1.691039
81	0.49951077	8.95342350	4.47233147		81.00000000	0.42395062	3.79580942	1.712417
82	0.50931501	8.92358970	4.54491818		82.00000000	0.41878049	3.73702525	1.733796
83	0.51941550	8.90067100	4.62314648		83.00000000	0.41373494	3.68251858	1.755168
84	0.52923089	8.85438060	4.68601173		84.00000000	0.40880952	3.61975512	1.776651
85	0.53937823	8.82146070	4.75810386		85.00000000	0.40400000	3.56387012	1.798033
86	0.54953825	8.71977710	4.79185105		86.00000000	0.39930233	3.48182727	1.819419
87	0.55932236	8.63000390	4.82695415		87.00000000	0.39471264	3.40637165	1.840768
88	0.56948459	8.45820050	4.81681484		88.00000000	0.39022727	3.30062051	1.862240
89	0.57928514	8.26403710	4.78723389		89.00000000	0.38584270	3.18861836	1.883619
90	0.58940792	7.95881030	4.69098582		90.00000000	0.38155556	3.03672829	1.905010
91	0.59920692	7.58349080	4.54408017		91.00000000	0.37736264	2.86172609	1.926500
92	0.60930073	7.06928400	4.30731990		92.00000000	0.37326087	2.63868709	1.947871
93	0.61910868	6.39582300	3.95970954		93.00000000	0.36924731	2.36164045	1.969229
94	0.62921584	5.53368850	3.48188446		94.00000000	0.36531915	2.02156237	1.990700
95	0.63933563	4.41426850	2.82219913		95.00000000	0.36147368	1.59564190	2.012210
96	0.64911383	3.09545060	2.00929979		96.00000000	0.35770833	1.10726848	2.033605
97	0.65922844	1.41203530	0.93085383		97.00000000	0.35402062	0.49988961	2.054962
98	0.66895527	-0.53415436	-0.35732537		98.00000000	0.35040816	-0.18717205	2.076341
99	0.67904305	-2.90130760	-1.97011276		99.00000000	0.34686869	-1.00637276	2.097840
100	0.68876916	-5.61242960	-3.86566842		100.00000000	0.34340000	-1.92730832	2.119218
101	0.69904083	-8.85823250	-6.19226620		101.00000000	0.34000000	-3.01179905	2.140633
15:08 02/04/2018
Test Lot:	JK-PERC
Recipe:	Recipe_YJX-LID
Cell Name:	1-30-50min
Test Order:	4
Test Condition:	Light
1	-0.29989663	9.00334840	-2.70007384		1.00000000	34.34000000	309.17498406	0.000000
2	-0.29005581	9.01506520	-2.61487204		2.00000000	17.17000000	154.78866948	0.061787
3	-0.27993217	8.99969480	-2.51930409		3.00000000	11.44666667	103.01650648	0.083214
4	-0.27014270	9.01094150	-2.43424007		4.00000000	8.58500000	77.35893278	0.104586
5	-0.25996324	9.00420090	-2.34076124		5.00000000	6.86800000	61.84085178	0.126067
6	-0.24979717	9.01162050	-2.25107730		6.00000000	5.72333333	51.57650800	0.147441
7	-0.24002482	9.00647260	-2.16177696		7.00000000	4.90571429	44.18318130	0.168823
8	-0.22985056	9.00507350	-2.06982119		8.00000000	4.29250000	38.65427800	0.190313
9	-0.21999337	9.00475690	-1.98098682		9.00000000	3.81555556	34.35815022	0.211755
10	-0.20987791	9.01588150	-1.89223437		10.00000000	3.43400000	30.96053707	0.233129
11	-0.20005941	9.00241370	-1.80101757		11.00000000	3.12181818	28.10389877	0.254509
12	-0.18991195	8.99305150	-1.70788795		12.00000000	2.86166667	25.73511571	0.275989
13	-0.18012173	9.00497060	-1.62199088		13.00000000	2.64153846	23.78697618	0.297373
14	-0.16999066	9.01319310	-1.53215864		14.00000000	2.45285714	22.10807508	0.318725
15	-0.16016173	9.00993060	-1.44304607		15.00000000	2.28933333	20.62673445	0.340097
16	-0.14998600	8.99778080	-1.34954115		16.00000000	2.14625000	19.31148704	0.361595
17	-0.13986234	9.01160430	-1.26038406		17.00000000	2.02000000	18.20344069	0.382968
18	-0.13002153	8.99394420	-1.16940639		18.00000000	1.90777778	17.15844688	0.404310
19	-0.11988374	9.01308440	-1.08052227		19.00000000	1.80736842	16.28996412	0.425688
20	-0.11006078	9.00536250	-0.99113722		20.00000000	1.71700000	15.46220741	0.447167
21	-0.09990587	9.00204470	-0.89935712		21.00000000	1.63523810	14.72048643	0.468571
22	-0.09010673	9.00003530	-0.81096378		22.00000000	1.56090909	14.04823692	0.489916
23	-0.07992057	9.01074600	-0.72014394		23.00000000	1.49304348	13.45343555	0.511280
24	-0.07010728	9.01795580	-0.63222436		24.00000000	1.43083333	12.90319176	0.532761
25	-0.05999108	9.01433750	-0.54077982		25.00000000	1.37360000	12.38209399	0.554137
26	-0.04979821	9.00210860	-0.44828892		26.00000000	1.32076923	11.88970805	0.575487
27	-0.04000354	9.00026420	-0.36004241		27.00000000	1.27185185	11.44700269	0.596866
28	-0.02988882	8.99706650	-0.26891172		28.00000000	1.22642857	11.03425941	0.618349
29	-0.02001823	9.01165580	-0.18039739		29.00000000	1.18413793	10.67104345	0.639725
30	-0.00987821	8.99790950	-0.08888323		30.00000000	1.14466667	10.29960707	0.661096
31	-0.00062388	9.01311970	-0.00562308		31.00000000	1.10774194	9.98421066	0.682575
32	0.00951370	8.99066830	0.08553454		32.00000000	1.07312500	9.64811092	0.704061
33	0.01933713	9.01486680	0.17432161		33.00000000	1.04060606	9.38092503	0.725466
34	0.02947909	8.99376200	0.26512792		34.00000000	1.01000000	9.08369962	0.746850
35	0.03929358	9.00590130	0.35387410		35.00000000	0.98114286	8.83607573	0.768213
36	0.04943331	9.00699140	0.44524543		36.00000000	0.95388889	8.59166902	0.789694
37	0.05922771	8.99645900	0.53283966		37.00000000	0.92810811	8.34968654	0.811080
38	0.06935479	9.01016900	0.62489835		38.00000000	0.90368421	8.14234746	0.832472
39	0.07949676	8.99912450	0.71540120		39.00000000	0.88051282	7.92384450	0.853954
40	0.08935888	9.00900270	0.80503440		40.00000000	0.85850000	7.73422882	0.875320
41	0.09948447	9.00703810	0.89606038		41.00000000	0.83756098	7.54394362	0.896679
42	0.10930715	9.00019740	0.98378593		42.00000000	0.81761905	7.35873283	0.918060
43	0.11949228	9.00206470	1.07567724		43.00000000	0.79860465	7.18909074	0.939541
44	0.12930380	9.00294780	1.16411536		44.00000000	0.78045455	7.02639153	0.960942
45	0.13946213	9.00785920	1.25625523		45.00000000	0.76311111	6.87399744	0.982288
46	0.14926398	8.99638370	1.34283604		46.00000000	0.74652174	6.71599601	1.003659
47	0.15942007	9.00312810	1.43527931		47.00000000	0.73063830	6.57803019	1.025141
48	0.16954418	9.00564480	1.52685466		48.00000000	0.71541667	6.44278838	1.046516
49	0.17939588	8.99989510	1.61454410		49.00000000	0.70081633	6.30727342	1.067908
50	0.18954231	8.99401760	1.70474687		50.00000000	0.68680000	6.17709129	1.089291
51	0.19932257	9.00033760	1.79397042		51.00000000	0.67333333	6.06022732	1.110770
52	0.20948984	9.00611020	1.88668858		52.00000000	0.66038462	5.94749662	1.132155
53	0.21929689	9.00262260	1.97424714		53.00000000	0.64792453	5.83302000	1.153504
54	0.22944406	8.99446960	2.06372762		54.00000000	0.63592593	5.71981641	1.174874
55	0.23925707	9.00731180	2.15506303		55.00000000	0.62436364	5.62383795	1.196348
56	0.24941689	9.00997730	2.24724052		56.00000000	0.61321429	5.52504679	1.217725
57	0.25954694	8.99388600	2.33433559		57.00000000	0.60245614	5.41842185	1.239065
58	0.26938823	9.00751400	2.42651825		58.00000000	0.59206897	5.33306950	1.260446
59	0.27953690	9.00472350	2.51715249		59.00000000	0.58203390	5.24105432	1.281936
60	0.28937745	9.00224020	2.60504531		60.00000000	0.57233333	5.15228214	1.303314
61	0.29952088	8.98477360	2.69112730		61.00000000	0.56295082	5.05798566	1.324694
62	0.30929074	9.01352500	2.78779982		62.00000000	0.55387097	4.99232981	1.346059
63	0.31946394	8.99583820	2.87384591		63.00000000	0.54507937	4.90344577	1.367538
64	0.32929260	9.00729660	2.96603612		64.00000000	0.53656250	4.83297758	1.388922
65	0.33941519	9.00782590	3.05739294		65.00000000	0.52830769	4.75890371	1.410305
66	0.34925276	9.00058650	3.14347968		66.00000000	0.52030303	4.68303243	1.431656
67	0.35939175	9.00132750	3.23500284		67.00000000	0.51253731	4.61351621	1.453139
68	0.36953893	9.00303270	3.32697107		68.00000000	0.50500000	4.54653151	1.474524
69	0.37937722	8.99389740	3.41207979		69.00000000	0.49768116	4.47609329	1.495918
70	0.38950133	9.00038430	3.50566166		70.00000000	0.49057143	4.41533138	1.517405
71	0.39933965	8.98834320	3.58940183		71.00000000	0.48366197	4.34731980	1.538775
72	0.40948460	8.99203970	3.68210178		72.00000000	0.47694444	4.28870338	1.560139
73	0.41932139	8.99122910	3.77021468		73.00000000	0.47041096	4.22957270	1.581515
74	0.42945445	8.99178120	3.86156045		74.00000000	0.46405405	4.17267252	1.602998
75	0.43928158	8.99098870	3.94957572		75.00000000	0.45786667	4.11667403	1.624393
76	0.44946671	8.98065660	4.03650618		76.00000000	0.45184211	4.05783878	1.645747
77	0.45957518	8.98798940	4.13065685		77.00000000	0.44597403	4.00840982	1.667158
78	0.46943060	8.97696970	4.21406427		78.00000000	0.44025641	3.95216846	1.688652
79	0.47958821	8.97083000	4.30230430		79.00000000	0.43468354	3.89947218	1.710049
80	0.48938408	8.96629050	4.38795983		80.00000000	0.42925000	3.84878020	1.731410
81	0.49952754	8.94038770	4.46596987		81.00000000	0.42395062	3.79028288	1.752785
82	0.50934726	8.93050480	4.54872815		82.00000000	0.41878049	3.73992116	1.774256
83	0.51948178	8.89074900	4.61858212		83.00000000	0.41373494	3.67841350	1.795641
84	0.52927321	8.86303230	4.69096556		84.00000000	0.40880952	3.62329201	1.816988
85	0.53942633	8.79058460	4.74187279		85.00000000	0.40400000	3.55139618	1.838362
86	0.54954374	8.71920970	4.79158711		86.00000000	0.39930233	3.48160071	1.859833
87	0.55938351	8.61147400	4.81711655		87.00000000	0.39471264	3.39905767	1.881206
88	0.56952178	8.44861600	4.81167082		88.00000000	0.39022727	3.29688038	1.902550
89	0.57931542	8.24638270	4.77725666		89.00000000	0.38584270	3.18180654	1.923932
90	0.58941495	7.94288730	4.68165652		90.00000000	0.38155556	3.03065278	1.945404
91	0.59924060	7.55479430	4.52713947		91.00000000	0.37736264	2.85089710	1.966795
92	0.60934538	7.04313950	4.29170452		92.00000000	0.37326087	2.62892837	1.988279
93	0.61917698	6.36028770	3.93814373		93.00000000	0.36924731	2.34851914	2.009668
94	0.62926906	5.49181270	3.45582782		94.00000000	0.36531915	2.00626434	2.031166
95	0.63940507	4.39414360	2.80963770		95.00000000	0.36147368	1.58836728	2.052546
96	0.64915109	3.05864930	1.98552553		96.00000000	0.35770833	1.09410434	2.073928
97	0.65928710	1.39720640	0.92116016		97.00000000	0.35402062	0.49463987	2.095284
98	0.66899890	-0.53410304	-0.35731435		98.00000000	0.35040816	-0.18715407	2.116779
99	0.67909324	-2.87158490	-1.95007389		99.00000000	0.34686869	-0.99606288	2.138159
100	0.68877602	-5.54012540	-3.81590552		100.00000000	0.34340000	-1.90247906	2.159551
101	0.69906455	-8.72050860	-6.09619842		101.00000000	0.34000000	-2.96497292	2.181041
