# Supplementary material for: Study on the Electrical Injection Regeneration of Industrialized B-Doped Czochralski Silicon PERC Solar Cells
Source: Hindawi journal article supplement (doi:10.1155/2019/5357370), 2019-06-20
Supplement: f1 [file 5357370.f1.zip › section3.2/IVRawData_1-30-60min.csv]

15:21 02/04/2018
Test Lot:	JK-PERC
Recipe:	Recipe_YJX-LID
Cell Name:	1-30-60min
Test Order:	2
Test Condition:	Light
1	-0.29992115	9.02276710	-2.70611868		1.00000000	34.34000000	309.84182221	0.000000
2	-0.29013181	9.01453110	-2.61540222		2.00000000	17.17000000	154.77949899	0.061792
3	-0.28001499	9.02531910	-2.52722464		3.00000000	11.44666667	103.30981930	0.083222
4	-0.27018991	9.01466460	-2.43567142		4.00000000	8.58500000	77.39089559	0.104726
5	-0.26000535	9.03272720	-2.34855740		5.00000000	6.86800000	62.03677041	0.126098
6	-0.24988483	9.02043250	-2.25406924		6.00000000	5.72333333	51.62694201	0.147573
7	-0.24006347	9.02607350	-2.16683052		7.00000000	4.90571429	44.27933771	0.168939
8	-0.22990870	9.01563930	-2.07277391		8.00000000	4.29250000	38.69963170	0.190422
9	-0.22010373	9.03156570	-1.98788130		9.00000000	3.81555556	34.46044068	0.211820
10	-0.20993853	9.01517010	-1.89263156		10.00000000	3.43400000	30.95809412	0.233208
11	-0.20008741	9.02718830	-1.80622673		11.00000000	3.12181818	28.18124057	0.254553
12	-0.18995868	9.02406410	-1.71419930		12.00000000	2.86166667	25.82386343	0.276034
13	-0.18013956	9.03057770	-1.62676429		13.00000000	2.64153846	23.85461832	0.297403
14	-0.17000189	9.01733970	-1.53296479		14.00000000	2.45285714	22.11824609	0.318788
15	-0.16019320	9.02980520	-1.44651339		15.00000000	2.28933333	20.67223404	0.340282
16	-0.15003546	9.03518390	-1.35559797		16.00000000	2.14625000	19.39176345	0.361660
17	-0.13991714	9.01899720	-1.26191229		17.00000000	2.02000000	18.21837434	0.383044
18	-0.13007718	9.02494340	-1.17393919		18.00000000	1.90777778	17.21758646	0.404418
19	-0.11993357	9.01626210	-1.08135250		19.00000000	1.80736842	16.29570740	0.425887
20	-0.11010255	9.02594850	-0.99377995		20.00000000	1.71700000	15.49755357	0.447276
21	-0.09996042	9.00403210	-0.90004680		21.00000000	1.63523810	14.72373630	0.468617
22	-0.09015768	9.02088830	-0.81330236		22.00000000	1.56090909	14.08078656	0.489983
23	-0.07999025	9.01120850	-0.72080878		23.00000000	1.49304348	13.45412608	0.511465
24	-0.07016444	9.02135180	-0.63297805		24.00000000	1.43083333	12.90805087	0.532838
25	-0.06001338	9.01632210	-0.54109993		25.00000000	1.37360000	12.38482004	0.554175
26	-0.04988241	9.02414890	-0.45014631		26.00000000	1.32076923	11.91881820	0.575558
27	-0.04006999	9.02487180	-0.36162656		27.00000000	1.27185185	11.47829991	0.597035
28	-0.02993903	9.01774690	-0.26998260		28.00000000	1.22642857	11.05962245	0.618414
29	-0.02012141	9.01346300	-0.18136354		29.00000000	1.18413793	10.67318343	0.639761
30	-0.00997407	9.02554420	-0.09002140		30.00000000	1.14466667	10.33123959	0.661129
31	-0.00066478	9.01622680	-0.00599378		31.00000000	1.10774194	9.98765253	0.682725
32	0.00949352	9.01474950	0.08558167		32.00000000	1.07312500	9.67395306	0.704111
33	0.01930193	9.03041930	0.17430454		33.00000000	1.04060606	9.39710905	0.725455
34	0.02945419	9.01526740	0.26553738		34.00000000	1.01000000	9.10542007	0.746833
35	0.03926856	9.02800750	0.35451683		35.00000000	0.98114286	8.85776507	0.768322
36	0.04939030	9.01638510	0.44532197		36.00000000	0.95388889	8.60062956	0.789703
37	0.05923072	9.03279880	0.53501917		37.00000000	0.92810811	8.38341381	0.811063
38	0.06935991	9.01319310	0.62515423		38.00000000	0.90368421	8.14508029	0.832436
39	0.07951737	9.02689270	0.71779478		39.00000000	0.88051282	7.94829475	0.853912
40	0.08930569	9.02006530	0.80554316		40.00000000	0.85850000	7.74372606	0.875312
41	0.09947135	9.02603150	0.89783150		41.00000000	0.83756098	7.55985175	0.896712
42	0.10931548	9.01831150	0.98584105		42.00000000	0.81761905	7.37354326	0.918077
43	0.11946700	9.01082800	1.07649659		43.00000000	0.79860465	7.19608915	0.939561
44	0.12927914	9.02409270	1.16662694		44.00000000	0.78045455	7.04289417	0.960949
45	0.13946488	9.02144910	1.25817532		45.00000000	0.76311111	6.88436805	0.982336
46	0.14923906	9.01376060	1.34520516		46.00000000	0.74652174	6.72896824	1.003835
47	0.15939504	9.01690960	1.43725067		47.00000000	0.73063830	6.58809948	1.025202
48	0.16957633	9.01704600	1.52907757		48.00000000	0.71541667	6.45094499	1.046556
49	0.17939515	9.01162240	1.61664135		49.00000000	0.70081633	6.31549211	1.067934
50	0.18952806	9.01973340	1.70949257		50.00000000	0.68680000	6.19475290	1.089416
51	0.19928811	9.02064420	1.79770713		51.00000000	0.67333333	6.07390043	1.110805
52	0.20945749	9.01640700	1.88855398		52.00000000	0.66038462	5.95429647	1.132146
53	0.21927185	9.02482510	1.97889010		53.00000000	0.64792453	5.84740555	1.153527
54	0.22942783	9.00534730	2.06607729		54.00000000	0.63592593	5.72673382	1.175012
55	0.23926453	9.03413390	2.16154780		55.00000000	0.62436364	5.64058469	1.196399
56	0.24937809	9.01783560	2.24885062		56.00000000	0.61321429	5.52986562	1.217802
57	0.25953928	9.02115150	2.34134317		57.00000000	0.60245614	5.43484811	1.239183
58	0.26935586	9.02377220	2.43060592		58.00000000	0.59206897	5.34269547	1.260655
59	0.27948654	9.01148890	2.51858985		59.00000000	0.58203390	5.24499201	1.282030
60	0.28929049	9.02939610	2.61211842		60.00000000	0.57233333	5.16782437	1.303374
61	0.29946956	9.01875880	2.70084373		61.00000000	0.56295082	5.07711766	1.324740
62	0.30930030	9.02518080	2.79149113		62.00000000	0.55387097	4.99878562	1.346205
63	0.31941831	9.02201940	2.88179819		63.00000000	0.54507937	4.91771661	1.367570
64	0.32926914	9.02748010	2.97247061		64.00000000	0.53656250	4.84380729	1.388927
65	0.33937675	9.01050280	3.05795516		65.00000000	0.52830769	4.76031794	1.410308
66	0.34920451	9.02435300	3.15134477		66.00000000	0.52030303	4.69539821	1.431789
67	0.35935158	9.01353840	3.23902927		67.00000000	0.51253731	4.61977476	1.453171
68	0.36952019	9.01568410	3.33147730		68.00000000	0.50500000	4.55292047	1.474575
69	0.37934574	9.01845460	3.42111233		69.00000000	0.49768116	4.48831494	1.495945
70	0.38947642	9.01796050	3.51228297		70.00000000	0.49057143	4.42395377	1.517418
71	0.39931384	9.02600860	3.60421015		71.00000000	0.48366197	4.36553712	1.538804
72	0.40947279	9.01594640	3.69178473		72.00000000	0.47694444	4.30010555	1.560180
73	0.41928419	9.01017190	3.77782263		73.00000000	0.47041096	4.23848360	1.581554
74	0.42942902	9.01446630	3.87107343		74.00000000	0.46405405	4.18319963	1.603026
75	0.43923369	9.00475310	3.95519093		75.00000000	0.45786667	4.12297629	1.624388
76	0.44942763	9.00965120	4.04918619		76.00000000	0.45184211	4.07093977	1.645786
77	0.45953599	9.00231650	4.13688843		77.00000000	0.44597403	4.01479933	1.667274
78	0.46939948	8.99688630	4.22313375		78.00000000	0.44025641	3.96093687	1.688657
79	0.47957107	8.99513530	4.31380666		79.00000000	0.43468354	3.91003729	1.710025
80	0.48938546	8.97770690	4.39355922		80.00000000	0.42925000	3.85368069	1.731400
81	0.49948114	8.97537230	4.48302919		81.00000000	0.42395062	3.80511463	1.752874
82	0.50934094	8.94843100	4.55780226		82.00000000	0.41878049	3.74742830	1.774262
83	0.51944333	8.91506480	4.63087095		83.00000000	0.41373494	3.68847380	1.795617
84	0.52922493	8.89868450	4.70940568		84.00000000	0.40880952	3.63786697	1.816987
85	0.53939950	8.82350350	4.75939338		85.00000000	0.40400000	3.56469541	1.838474
86	0.54955995	8.75329590	4.81046086		86.00000000	0.39930233	3.49521141	1.859849
87	0.55937433	8.64705370	4.83693987		87.00000000	0.39471264	3.41310143	1.881219
88	0.56949759	8.49542430	4.83812366		88.00000000	0.39022727	3.31514626	1.902601
89	0.57929182	8.29250050	4.80377771		89.00000000	0.38584270	3.19960075	1.924081
90	0.58942401	8.00628850	4.71909867		90.00000000	0.38155556	3.05484386	1.945468
91	0.59922421	7.62799600	4.57087988		91.00000000	0.37736264	2.87852069	1.966815
92	0.60931098	7.12363860	4.34051122		92.00000000	0.37326087	2.65897554	1.988292
93	0.61913729	6.48210760	4.01331453		93.00000000	0.36924731	2.39350081	2.009798
94	0.62924337	5.59727950	3.52205102		94.00000000	0.36531915	2.04479338	2.031177
95	0.63934803	4.51952080	2.88954672		95.00000000	0.36147368	1.63368783	2.052512
96	0.64915270	3.20663380	2.08159499		96.00000000	0.35770833	1.14703963	2.073885
97	0.65922904	1.54041100	1.01548366		97.00000000	0.35402062	0.54533726	2.095383
98	0.66896600	-0.37682575	-0.25208361		98.00000000	0.35040816	-0.13204282	2.116751
99	0.67902452	-2.74000950	-1.86053364		99.00000000	0.34686869	-0.95042350	2.138173
100	0.68876517	-5.41445880	-3.72929064		100.00000000	0.34340000	-1.85932515	2.159539
101	0.69902980	-8.64750670	-6.04486488		101.00000000	0.34000000	-2.94015228	2.181016
15:21 02/04/2018
Test Lot:	JK-PERC
Recipe:	Recipe_YJX-LID
Cell Name:	1-30-60min
Test Order:	3
Test Condition:	Light
1	-0.29999259	9.01835820	-2.70544063		1.00000000	34.34000000	309.69042059	0.000000
2	-0.29012734	9.03038220	-2.61996077		2.00000000	17.17000000	155.05166237	0.021658
3	-0.27997926	9.01943780	-2.52525552		3.00000000	11.44666667	103.24249802	0.043057
4	-0.27018917	9.01656720	-2.43617881		4.00000000	8.58500000	77.40722941	0.064411
5	-0.26005524	9.02369880	-2.34666016		5.00000000	6.86800000	61.97476336	0.085792
6	-0.24991013	9.01715950	-2.25347950		6.00000000	5.72333333	51.60820954	0.107288
7	-0.24010515	9.03591820	-2.16957049		7.00000000	4.90571429	44.32763300	0.128666
8	-0.22988562	9.00987820	-2.07124144		8.00000000	4.29250000	38.67490217	0.150025
9	-0.22006279	9.04216860	-1.98984485		9.00000000	3.81555556	34.50089664	0.171405
10	-0.20991917	9.01494980	-1.89241078		10.00000000	3.43400000	30.95733761	0.192883
11	-0.20011272	9.02408220	-1.80583363		11.00000000	3.12181818	28.17154389	0.214321
12	-0.18995421	9.01638030	-1.71269940		12.00000000	2.86166667	25.80187496	0.235691
13	-0.18018571	9.02347470	-1.62590120		13.00000000	2.64153846	23.83585548	0.257053
14	-0.17001382	9.02268890	-1.53398181		14.00000000	2.45285714	22.13136692	0.278532
15	-0.16019768	9.01576140	-1.44430406		15.00000000	2.28933333	20.64008310	0.299908
16	-0.15007192	9.01605130	-1.35305613		16.00000000	2.14625000	19.35070010	0.321285
17	-0.13990597	9.02555080	-1.26272844		17.00000000	2.02000000	18.23161262	0.342631
18	-0.13010174	9.02455140	-1.17410984		18.00000000	1.90777778	17.21683862	0.364108
19	-0.11996409	9.01921560	-1.08198199		19.00000000	1.80736842	16.30104546	0.385494
20	-0.11012041	9.02758880	-0.99412178		20.00000000	1.71700000	15.50036997	0.406873
21	-0.09997754	9.03787900	-0.90358489		21.00000000	1.63523810	14.77908404	0.428356
22	-0.09013832	9.01311110	-0.81242673		22.00000000	1.56090909	14.06864705	0.449744
23	-0.07999918	9.03133010	-0.72249899		23.00000000	1.49304348	13.48416851	0.471089
24	-0.07018527	9.02523420	-0.63343854		24.00000000	1.43083333	12.91360593	0.492468
25	-0.06007515	9.00677390	-0.54108328		25.00000000	1.37360000	12.37170463	0.513946
26	-0.04988986	9.03151890	-0.45058117		26.00000000	1.32076923	11.92855227	0.535333
27	-0.04006255	9.01389690	-0.36111970		27.00000000	1.27185185	11.46434146	0.556680
28	-0.02993457	9.01291750	-0.26979777		28.00000000	1.22642857	11.05369953	0.578064
29	-0.02008642	9.02124500	-0.18120455		29.00000000	1.18413793	10.68239839	0.599536
30	-0.00996439	9.02360340	-0.08991474		30.00000000	1.14466667	10.32901803	0.620911
31	-0.00070125	9.02329640	-0.00632755		31.00000000	1.10774194	9.99548382	0.642389
32	0.00944588	9.01911070	0.08519348		32.00000000	1.07312500	9.67863317	0.663765
33	0.01928630	9.02458480	0.17405088		33.00000000	1.04060606	9.39103764	0.685240
34	0.02941177	9.01776700	0.26522846		34.00000000	1.01000000	9.10794467	0.706622
35	0.03924698	9.02858830	0.35434479		35.00000000	0.98114286	8.85833492	0.727962
36	0.04940370	9.01319790	0.44528530		36.00000000	0.95388889	8.59758933	0.749353
37	0.05923072	9.02654930	0.53464901		37.00000000	0.92810811	8.37761359	0.770838
38	0.06936809	9.01172920	0.62512648		38.00000000	0.90368421	8.14375739	0.792220
39	0.07950323	9.02439790	0.71746879		39.00000000	0.88051282	7.94609805	0.813578
40	0.08931909	9.02301120	0.80592713		40.00000000	0.85850000	7.74625512	0.834962
41	0.09948400	9.02137180	0.89748213		41.00000000	0.83756098	7.55594897	0.856445
42	0.10931251	9.02104190	0.98611273		42.00000000	0.81761905	7.37577569	0.877826
43	0.11944468	9.01487350	1.07677868		43.00000000	0.79860465	7.19931991	0.899213
44	0.12928137	9.02119830	1.16627288		44.00000000	0.78045455	7.04063522	0.920577
45	0.13944478	9.01592640	1.25722387		45.00000000	0.76311111	6.88015361	0.942053
46	0.14923608	9.01519870	1.34539291		46.00000000	0.74652174	6.73004181	0.963441
47	0.15940398	9.03594970	1.44036635		47.00000000	0.73063830	6.60201091	0.984823
48	0.16952869	9.01867870	1.52892479		48.00000000	0.71541667	6.45211305	1.006168
49	0.17936614	9.01754670	1.61744254		49.00000000	0.70081633	6.31964395	1.027644
50	0.18952137	9.03067590	1.71150607		50.00000000	0.68680000	6.20226821	1.049030
51	0.19931342	9.00062750	1.79394585		51.00000000	0.67333333	6.06042252	1.070421
52	0.20944706	9.03569130	1.89249898		52.00000000	0.66038462	5.96703152	1.091894
53	0.21926738	9.01080130	1.97577479		53.00000000	0.64792453	5.83831918	1.113286
54	0.22940922	9.02227690	2.06979351		54.00000000	0.63592593	5.73749979	1.134627
55	0.23924443	9.01701930	2.15727164		55.00000000	0.62436364	5.62989896	1.156003
56	0.24938776	9.01990510	2.24945393		56.00000000	0.61321429	5.53113466	1.177505
57	0.25948569	9.02659610	2.34227252		57.00000000	0.60245614	5.43812825	1.198882
58	0.26933280	9.00981520	2.42663876		58.00000000	0.59206897	5.33443196	1.220239
59	0.27948359	9.01958660	2.52082644		59.00000000	0.58203390	5.24970515	1.241618
60	0.28931653	9.02069950	2.60983748		60.00000000	0.57233333	5.16284701	1.263090
61	0.29946584	9.00754360	2.69745161		61.00000000	0.56295082	5.07080405	1.284485
62	0.30924523	9.02715970	2.79160608		62.00000000	0.55387097	4.99988168	1.305833
63	0.31938705	9.00940610	2.87748764		63.00000000	0.54507937	4.91084136	1.327204
64	0.32923716	9.01480010	2.96800718		64.00000000	0.53656250	4.83700368	1.348682
65	0.33937153	9.02207660	3.06183594		65.00000000	0.52830769	4.76643247	1.370049
66	0.34922314	9.01370330	3.14779377		66.00000000	0.52030303	4.68985714	1.391406
67	0.35936421	9.02763370	3.24420845		67.00000000	0.51253731	4.62699912	1.412780
68	0.36953434	9.01184750	3.33018712		68.00000000	0.50500000	4.55098299	1.434262
69	0.37935168	9.02062420	3.42198894		69.00000000	0.49768116	4.48939471	1.455650
70	0.38946450	9.01053620	3.50928398		70.00000000	0.49057143	4.42031162	1.477007
71	0.39928111	9.01925090	3.60121651		71.00000000	0.48366197	4.36226867	1.498381
72	0.40947875	9.02104470	3.69392611		72.00000000	0.47694444	4.30253715	1.519856
73	0.41923732	9.01670270	3.78013828		73.00000000	0.47041096	4.24155576	1.541242
74	0.42943496	9.00574970	3.86738376		74.00000000	0.46405405	4.17915466	1.562598
75	0.43926048	9.01626490	3.96048885		75.00000000	0.45786667	4.12824716	1.584000
76	0.44943136	8.99973960	4.04476521		76.00000000	0.45184211	4.06646129	1.605482
77	0.45954567	9.01540090	4.14298845		77.00000000	0.44597403	4.02063464	1.626853
78	0.46942180	8.98151870	4.21612067		78.00000000	0.44025641	3.95417118	1.648242
79	0.47955918	8.98819450	4.31037118		79.00000000	0.43468354	3.90702024	1.669577
80	0.48935568	8.98928740	4.39895885		80.00000000	0.42925000	3.85865162	1.691041
81	0.49951538	8.95024680	4.47078593		81.00000000	0.42395062	3.79446266	1.712438
82	0.50931489	8.95547580	4.56115717		82.00000000	0.41878049	3.75037852	1.733820
83	0.51947975	8.91162870	4.62941065		83.00000000	0.41373494	3.68705216	1.755304
84	0.52923387	8.89219570	4.70605114		84.00000000	0.40880952	3.63521429	1.776695
85	0.53939205	8.82600690	4.76067796		85.00000000	0.40400000	3.56570679	1.798047
86	0.54951978	8.75433440	4.81067991		86.00000000	0.39930233	3.49562608	1.819426
87	0.55935574	8.66059020	4.84435084		87.00000000	0.39471264	3.41844445	1.840916
88	0.56949085	8.50901030	4.84580351		88.00000000	0.39022727	3.32044788	1.862289
89	0.57928365	8.30859380	4.81303254		89.00000000	0.38584270	3.20581024	1.883639
90	0.58938676	8.02275560	4.72850593		90.00000000	0.38155556	3.06112697	1.905025
91	0.59920710	7.66197400	4.59110922		91.00000000	0.37736264	2.89134272	1.926511
92	0.60929310	7.15886260	4.36184559		92.00000000	0.37326087	2.67212328	1.947898
93	0.61911273	6.50515270	4.02742285		93.00000000	0.36924731	2.40201015	1.969252
94	0.62919575	5.65575550	3.55857732		94.00000000	0.36531915	2.06615579	1.990731
95	0.63934726	4.56669470	2.91970374		95.00000000	0.36147368	1.65073996	2.012243
96	0.64912444	3.23843770	2.10214906		96.00000000	0.35770833	1.15841615	2.033632
97	0.65924096	1.55323310	1.02395488		97.00000000	0.35402062	0.54987654	2.054972
98	0.66898018	-0.40742028	-0.27255609		98.00000000	0.35040816	-0.14276339	2.076361
99	0.67903566	-2.82036660	-1.91512950		99.00000000	0.34686869	-0.97829686	2.097843
100	0.68875104	-5.57238250	-3.83798424		100.00000000	0.34340000	-1.91355615	2.119210
101	0.69903356	-8.91924570	-6.23485207		101.00000000	0.34000000	-3.03254354	2.140563
15:21 02/04/2018
Test Lot:	JK-PERC
Recipe:	Recipe_YJX-LID
Cell Name:	1-30-60min
Test Order:	4
Test Condition:	Light
1	-0.29995054	9.02315520	-2.70650027		1.00000000	34.34000000	309.85514957	0.000000
2	-0.29016548	9.01686670	-2.61638345		2.00000000	17.17000000	154.81960124	0.061797
3	-0.28000903	9.03051660	-2.52862619		3.00000000	11.44666667	103.36931335	0.083218
4	-0.27020165	9.01103590	-2.43479677		4.00000000	8.58500000	77.35974320	0.104701
5	-0.26000649	9.02818490	-2.34738667		5.00000000	6.86800000	62.00557389	0.126089
6	-0.24987459	9.00948050	-2.25124025		6.00000000	5.72333333	51.56426006	0.147447
7	-0.24004115	9.02330880	-2.16596542		7.00000000	4.90571429	44.26577488	0.168821
8	-0.22987725	9.01795480	-2.07302265		8.00000000	4.29250000	38.70957098	0.190325
9	-0.22010410	9.01679990	-1.98463463		9.00000000	3.81555556	34.40410095	0.211758
10	-0.20995435	9.01206400	-1.89212204		10.00000000	3.43400000	30.94742778	0.233123
11	-0.20010900	9.01994420	-1.80497201		11.00000000	3.12181818	28.15862580	0.254506
12	-0.18995701	9.02366450	-1.71410833		12.00000000	2.86166667	25.82271991	0.275991
13	-0.18020172	9.02425480	-1.62618624		13.00000000	2.64153846	23.83791614	0.297374
14	-0.17004973	9.01243400	-1.53256197		14.00000000	2.45285714	22.10621311	0.318759
15	-0.16025276	9.01845070	-1.44523162		15.00000000	2.28933333	20.64623980	0.340100
16	-0.15008886	9.01149650	-1.35252524		16.00000000	2.14625000	19.34092436	0.361582
17	-0.13993166	9.03172300	-1.26382399		17.00000000	2.02000000	18.24408046	0.382962
18	-0.13013098	9.01577380	-1.17323148		18.00000000	1.90777778	17.20009291	0.404341
19	-0.11995889	9.02159790	-1.08222087		19.00000000	1.80736842	16.30535115	0.425750
20	-0.11015225	9.02585220	-0.99421793		20.00000000	1.71700000	15.49738823	0.447221
21	-0.10001515	9.01424980	-0.90156155		21.00000000	1.63523810	14.74044467	0.468586
22	-0.09017352	9.01194000	-0.81263835		22.00000000	1.56090909	14.06681907	0.489995
23	-0.08002153	9.01469420	-0.72136962		23.00000000	1.49304348	13.45933038	0.511361
24	-0.07021787	9.02911660	-0.63400534		24.00000000	1.43083333	12.91916100	0.532838
25	-0.06006216	9.02134420	-0.54184137		25.00000000	1.37360000	12.39171839	0.554218
26	-0.04989975	9.01933670	-0.45006261		26.00000000	1.32076923	11.91246240	0.575580
27	-0.04007822	9.02246760	-0.36160443		27.00000000	1.27185185	11.47524213	0.596938
28	-0.02995972	9.01943870	-0.27021986		28.00000000	1.22642857	11.06169732	0.618426
29	-0.02006897	9.01796630	-0.18098132		29.00000000	1.18413793	10.67851596	0.639811
30	-0.00994452	9.01838210	-0.08968350		30.00000000	1.14466667	10.32304138	0.661203
31	-0.00066930	9.01835060	-0.00603594		31.00000000	1.10774194	9.99000515	0.682666
32	0.00948398	9.00619130	0.08541450		32.00000000	1.07312500	9.66476904	0.704142
33	0.01929927	9.01635270	0.17400903		33.00000000	1.04060606	9.38247126	0.725527
34	0.02944799	9.03013800	0.26591944		34.00000000	1.01000000	9.12043938	0.746907
35	0.03925585	9.02680020	0.35435468		35.00000000	0.98114286	8.85658054	0.768397
36	0.04941648	9.01147460	0.44531531		36.00000000	0.95388889	8.59594549	0.789781
37	0.05925187	9.02004620	0.53445458		37.00000000	0.92810811	8.37157801	0.811128
38	0.06940208	9.01712040	0.62580688		38.00000000	0.90368421	8.14862933	0.832500
39	0.07952327	9.01597880	0.71698007		39.00000000	0.88051282	7.93868492	0.853977
40	0.08936163	9.01908110	0.80595979		40.00000000	0.85850000	7.74288112	0.875357
41	0.09947389	9.01330570	0.89658854		41.00000000	0.83756098	7.54919312	0.896717
42	0.10932044	9.00841900	0.98480433		42.00000000	0.81761905	7.36545496	0.918095
43	0.11945353	9.02431300	1.07798604		43.00000000	0.79860465	7.20685834	0.939585
44	0.12928893	9.01447200	1.16547144		44.00000000	0.78045455	7.03538565	0.960981
45	0.13941458	9.02069660	1.25761663		45.00000000	0.76311111	6.88379381	0.982338
46	0.14920457	9.01874730	1.34563831		46.00000000	0.74652174	6.73269092	1.003710
47	0.15935403	9.00832560	1.43551299		47.00000000	0.73063830	6.58182768	1.025182
48	0.16953699	9.02199840	1.52956245		48.00000000	0.71541667	6.45448802	1.046556
49	0.17935228	9.02421670	1.61851384		49.00000000	0.70081633	6.32431840	1.067892
50	0.18949580	9.01316550	1.70795701		50.00000000	0.68680000	6.19024207	1.089267
51	0.19926345	9.01372240	1.79610542		51.00000000	0.67333333	6.06923975	1.110745
52	0.20943823	9.02416800	1.89000577		52.00000000	0.66038462	5.95942171	1.132130
53	0.21920590	9.00948050	1.97493128		53.00000000	0.64792453	5.83746340	1.153488
54	0.22939779	9.02630230	2.07061380		54.00000000	0.63592593	5.74005965	1.174852
55	0.23923764	9.01628970	2.15703587		55.00000000	0.62436364	5.62944342	1.196389
56	0.24934840	9.01298140	2.24737249		56.00000000	0.61321429	5.52688895	1.217763
57	0.25950310	9.01280780	2.33885156		57.00000000	0.60245614	5.42982140	1.239114
58	0.26930499	9.02544500	2.43059738		58.00000000	0.59206897	5.34368588	1.260480
59	0.27949241	9.00770950	2.51758644		59.00000000	0.58203390	5.24279228	1.281953
60	0.28931588	9.01944350	2.60946823		60.00000000	0.57233333	5.16212816	1.303330
61	0.29944900	9.01521970	2.69959852		61.00000000	0.56295082	5.07512532	1.324721
62	0.30929330	9.01643280	2.78872225		62.00000000	0.55387097	4.99394036	1.346064
63	0.31943086	9.01537800	2.87978995		63.00000000	0.54507937	4.91409652	1.367542
64	0.32925436	9.01458550	2.96809158		64.00000000	0.53656250	4.83688853	1.388946
65	0.33943284	9.02307700	3.06272865		65.00000000	0.52830769	4.76696099	1.410329
66	0.34921241	9.01110550	3.14678987		66.00000000	0.52030303	4.68850550	1.431806
67	0.35938942	9.01154330	3.23865332		67.00000000	0.51253731	4.61875219	1.453204
68	0.36952773	9.00946520	3.32924722		68.00000000	0.50500000	4.54977993	1.474557
69	0.37936386	9.02792640	3.42486901		69.00000000	0.49768116	4.49302888	1.495926
70	0.38950142	9.01356890	3.51079789		70.00000000	0.49057143	4.42179937	1.517415
71	0.39929363	9.00535490	3.59578085		71.00000000	0.48366197	4.35554771	1.538793
72	0.40946245	9.01747230	3.69231630		72.00000000	0.47694444	4.30083332	1.560143
73	0.41925988	9.00779150	3.77660558		73.00000000	0.47041096	4.23736384	1.581517
74	0.42943615	9.00014310	3.86498680		74.00000000	0.46405405	4.17655289	1.603000
75	0.43928269	9.02079390	3.96267861		75.00000000	0.45786667	4.13032083	1.624386
76	0.44940314	9.00456240	4.04667862		76.00000000	0.45184211	4.06864043	1.645735
77	0.45955709	8.99437710	4.13342977		77.00000000	0.44597403	4.01125857	1.667099
78	0.46939245	9.00676820	4.22770899		78.00000000	0.44025641	3.96528744	1.688592
79	0.47955087	8.99762440	4.31481861		79.00000000	0.43468354	3.91111926	1.709982
80	0.48935276	8.96622470	4.38764680		80.00000000	0.42925000	3.84875195	1.731323
81	0.49947840	8.97779660	4.48421548		81.00000000	0.42395062	3.80614241	1.752697
82	0.50932199	8.94751360	4.55716543		82.00000000	0.41878049	3.74704411	1.774193
83	0.51945436	8.92562390	4.63645425		83.00000000	0.41373494	3.69284247	1.795574
84	0.52920789	8.88641260	4.70275966		84.00000000	0.40880952	3.63285010	1.816929
85	0.53936177	8.84541130	4.77087670		85.00000000	0.40400000	3.57354617	1.838304
86	0.54949266	8.75039390	4.80827722		86.00000000	0.39930233	3.49405263	1.859773
87	0.55932653	8.68100550	4.85551668		87.00000000	0.39471264	3.42650263	1.881134
88	0.56945074	8.52193260	4.85282083		88.00000000	0.39022727	3.32549052	1.902501
89	0.57928312	8.32882210	4.82474605		89.00000000	0.38584270	3.21361518	1.923870
90	0.58939761	8.06153580	4.75144993		90.00000000	0.38155556	3.07592377	1.945364
91	0.59920251	7.69427970	4.61043171		91.00000000	0.37736264	2.90353368	1.966730
92	0.60933113	7.20372300	4.38945268		92.00000000	0.37326087	2.68886791	1.988210
93	0.61910772	6.56249090	4.06288878		93.00000000	0.36924731	2.42318212	2.009593
94	0.62919617	5.70791630	3.59139907		94.00000000	0.36531915	2.08521112	2.031083
95	0.63935006	4.62236790	2.95531119		95.00000000	0.36147368	1.67086435	2.052473
96	0.64911550	3.27884510	2.12834918		96.00000000	0.35770833	1.17287022	2.073856
97	0.65926719	1.57519910	1.03847708		97.00000000	0.35402062	0.55765296	2.095346
98	0.66900289	-0.43297216	-0.28965963		98.00000000	0.35040816	-0.15171698	2.116728
99	0.67904890	-2.89300630	-1.96449275		99.00000000	0.34686869	-1.00349330	2.138079
100	0.68880463	-5.75833180	-3.96636560		100.00000000	0.34340000	-1.97741114	2.159456
101	0.69907093	-9.23503210	-6.45594248		101.00000000	0.34000000	-3.13991091	2.180931
