# Supplementary material for: Study on the Electrical Injection Regeneration of Industrialized B-Doped Czochralski Silicon PERC Solar Cells
Source: Hindawi journal article supplement (doi:10.1155/2019/5357370), 2019-06-20
Supplement: f1 [file 5357370.f1.zip › section3.2/IVRawData_1-30-after.csv]

13:09 02/04/2018
Test Lot:	JK-PERC
Recipe:	Recipe_YJX-LID
Cell Name:	1-30-after
Test Order:	2
Test Condition:	Light
1	-0.29990608	8.99998190	-2.69914929		1.00000000	34.34000000	309.05937845	0.000000
2	-0.29005733	9.01404000	-2.61458837		2.00000000	17.17000000	154.77106680	0.061738
3	-0.27995405	9.02030660	-2.52527136		3.00000000	11.44666667	103.25244288	0.083191
4	-0.27011943	9.01942730	-2.43632256		4.00000000	8.58500000	77.43178337	0.104660
5	-0.25994244	9.02291300	-2.34543802		5.00000000	6.86800000	61.96936648	0.126064
6	-0.24979003	9.02063180	-2.25326389		6.00000000	5.72333333	51.62808267	0.147441
7	-0.23997478	9.02011300	-2.16459963		7.00000000	4.90571429	44.25009720	0.168939
8	-0.22982535	9.02343080	-2.07381314		8.00000000	4.29250000	38.73307671	0.190388
9	-0.21998106	9.01273820	-1.98263170		9.00000000	3.81555556	34.38860331	0.211762
10	-0.20986214	9.02308850	-1.89360466		10.00000000	3.43400000	30.98528591	0.233137
11	-0.20002083	9.01491450	-1.80317068		11.00000000	3.12181818	28.14292399	0.254624
12	-0.18987884	9.02791120	-1.71420931		12.00000000	2.86166667	25.83487255	0.276016
13	-0.18010527	9.01449870	-1.62355872		13.00000000	2.64153846	23.81214503	0.297357
14	-0.16999230	9.01695730	-1.53281331		14.00000000	2.45285714	22.11730812	0.318726
15	-0.16015175	9.01885990	-1.44438620		15.00000000	2.28933333	20.64717660	0.340204
16	-0.14995988	9.02783490	-1.35381304		16.00000000	2.14625000	19.37599065	0.361569
17	-0.13984765	9.01316740	-1.26047028		17.00000000	2.02000000	18.20659815	0.382907
18	-0.13007483	9.02192210	-1.17352498		18.00000000	1.90777778	17.21182250	0.404279
19	-0.11987924	9.02175520	-1.08152116		19.00000000	1.80736842	16.30563545	0.425763
20	-0.11003273	9.01501270	-0.99194646		20.00000000	1.71700000	15.47877681	0.447157
21	-0.09988775	9.00842950	-0.89983176		21.00000000	1.63523810	14.73092710	0.468515
22	-0.09006059	9.01049900	-0.81149087		22.00000000	1.56090909	14.06456980	0.489896
23	-0.07991934	9.03241060	-0.72186428		23.00000000	1.49304348	13.48578174	0.511375
24	-0.07012641	9.01454730	-0.63215788		24.00000000	1.43083333	12.89831476	0.532752
25	-0.05997474	9.01244830	-0.54051925		25.00000000	1.37360000	12.37949898	0.554101
26	-0.04980743	9.02555180	-0.44953957		26.00000000	1.32076923	11.92067111	0.575483
27	-0.03996614	9.00836750	-0.36002964		27.00000000	1.27185185	11.45730889	0.596956
28	-0.02983009	9.02406120	-0.26918855		28.00000000	1.22642857	11.06736649	0.618336
29	-0.02003047	9.01079750	-0.18049053		29.00000000	1.18413793	10.67002711	0.639694
30	-0.00987061	9.02891640	-0.08912089		30.00000000	1.14466667	10.33509964	0.661080
31	-0.00064858	9.02106950	-0.00585086		31.00000000	1.10774194	9.99301699	0.682681
32	0.00949173	9.01484970	0.08556650		32.00000000	1.07312500	9.67406058	0.704080
33	0.01932233	9.02987380	0.17447816		33.00000000	1.04060606	9.39654140	0.725482
34	0.02945436	9.01546860	0.26554488		34.00000000	1.01000000	9.10562329	0.746850
35	0.03928496	9.02103610	0.35439103		35.00000000	0.98114286	8.85092513	0.768330
36	0.04942146	9.02058890	0.44581066		36.00000000	0.95388889	8.60463952	0.789704
37	0.05921112	9.02161790	0.53418014		37.00000000	0.92810811	8.37303672	0.811137
38	0.06938782	9.01340580	0.62542054		38.00000000	0.90368421	8.14527250	0.832501
39	0.07952804	9.02317330	0.71759530		39.00000000	0.88051282	7.94501977	0.853981
40	0.08936013	9.01105590	0.80522908		40.00000000	0.85850000	7.73599149	0.875362
41	0.09951598	9.00911710	0.89655114		41.00000000	0.83756098	7.54568491	0.896743
42	0.10929076	9.01684570	0.98545792		42.00000000	0.81761905	7.37234479	0.918224
43	0.11946893	9.00613120	1.07595286		43.00000000	0.79860465	7.19233827	0.939599
44	0.12927794	9.02186680	1.16632835		44.00000000	0.78045455	7.04115695	0.960951
45	0.13941371	9.00175290	1.25496777		45.00000000	0.76311111	6.86933766	0.982321
46	0.14925472	9.02925680	1.34765920		46.00000000	0.74652174	6.74053649	1.003806
47	0.15942696	9.01130960	1.43664570		47.00000000	0.73063830	6.58400791	1.025186
48	0.16953741	9.01286030	1.52801699		48.00000000	0.71541667	6.44795047	1.046529
49	0.17936279	9.01982590	1.61782114		49.00000000	0.70081633	6.32124125	1.067912
50	0.18950823	9.01539710	1.70849195		50.00000000	0.68680000	6.19177473	1.089396
51	0.19929938	9.01903340	1.79748776		51.00000000	0.67333333	6.07281582	1.110767
52	0.20941652	9.00471500	1.88573608		52.00000000	0.66038462	5.94657525	1.132122
53	0.21925531	9.03159810	1.98022584		53.00000000	0.64792453	5.85179394	1.153492
54	0.22942753	9.01281550	2.06778800		54.00000000	0.63592593	5.73148304	1.174961
55	0.23921794	9.01626300	2.15685186		55.00000000	0.62436364	5.62942675	1.196357
56	0.24940580	9.00635530	2.24623725		56.00000000	0.61321429	5.52282573	1.217700
57	0.25955197	9.01673700	2.34031185		57.00000000	0.60245614	5.43218857	1.239088
58	0.26938406	9.02209570	2.43040877		58.00000000	0.59206897	5.34170287	1.260567
59	0.27952653	9.01645470	2.52033830		59.00000000	0.58203390	5.24788228	1.281945
60	0.28933629	9.00053410	2.60418114		60.00000000	0.57233333	5.15130568	1.303307
61	0.29946607	9.02476410	2.70261064		61.00000000	0.56295082	5.08049835	1.324678
62	0.30927062	9.01679900	2.78863102		62.00000000	0.55387097	4.99414319	1.346156
63	0.31946146	9.00475980	2.87667371		63.00000000	0.54507937	4.90830875	1.367536
64	0.32927942	9.02203560	2.97077065		64.00000000	0.53656250	4.84088598	1.388897
65	0.33944121	9.01576710	3.06032289		65.00000000	0.52830769	4.76309911	1.410256
66	0.34922865	9.02283000	3.15103074		66.00000000	0.52030303	4.69460579	1.431747
67	0.35940757	9.00732800	3.23730187		67.00000000	0.51253731	4.61659169	1.453135
68	0.36954111	9.02526280	3.33520563		68.00000000	0.50500000	4.55775771	1.474524
69	0.37938657	9.00635810	3.41689131		69.00000000	0.49768116	4.48229474	1.495870
70	0.38947767	9.01740930	3.51207956		70.00000000	0.49057143	4.42368336	1.517349
71	0.39933583	9.00935940	3.59776001		71.00000000	0.48366197	4.35748453	1.538731
72	0.40950805	9.01671030	3.69241545		72.00000000	0.47694444	4.30046988	1.560112
73	0.41930217	9.00269030	3.77484758		73.00000000	0.47041096	4.23496418	1.581589
74	0.42946771	9.02545170	3.87614007		74.00000000	0.46405405	4.18829745	1.602980
75	0.43928638	9.00013730	3.95363773		75.00000000	0.45786667	4.12086287	1.624342
76	0.44941545	9.00488470	4.04693431		76.00000000	0.45184211	4.06878606	1.645713
77	0.45957652	9.00783730	4.13979052		77.00000000	0.44597403	4.01726147	1.667203
78	0.46941978	8.99980640	4.22468714		78.00000000	0.44025641	3.96222246	1.688588
79	0.47956297	9.00220970	4.31712642		79.00000000	0.43468354	3.91311242	1.709936
80	0.48936826	8.98506930	4.39700773		80.00000000	0.42925000	3.85684100	1.731317
81	0.49949956	8.97379110	4.48240471		81.00000000	0.42395062	3.80444428	1.752798
82	0.50933981	8.96320720	4.56531825		82.00000000	0.41878049	3.75361628	1.774192
83	0.51947629	8.91679100	4.63206151		83.00000000	0.41373494	3.68918799	1.795541
84	0.52926224	8.89732550	4.70901842		84.00000000	0.40880952	3.63731140	1.816905
85	0.53941590	8.84569360	4.77150777		85.00000000	0.40400000	3.57366021	1.838378
86	0.54955089	8.75655840	4.81217446		86.00000000	0.39930233	3.49651413	1.859742
87	0.55936140	8.66109940	4.84468469		87.00000000	0.39471264	3.41864544	1.881080
88	0.56950384	8.49517630	4.83803552		88.00000000	0.39022727	3.31504948	1.902460
89	0.57930094	8.28480720	4.79939660		89.00000000	0.38584270	3.19663235	1.923935
90	0.58943003	7.99361090	4.71167431		90.00000000	0.38155556	3.05000665	1.945321
91	0.59921449	7.60295150	4.55579871		91.00000000	0.37736264	2.86906983	1.966685
92	0.60935616	7.06598140	4.30569929		92.00000000	0.37326087	2.63745436	1.988190
93	0.61914289	6.40597490	3.96621381		93.00000000	0.36924731	2.36538901	2.009694
94	0.62924957	5.50106530	3.46154297		94.00000000	0.36531915	2.00964449	2.031103
95	0.63938165	4.37104750	2.79476756		95.00000000	0.36147368	1.58001864	2.052461
96	0.64914447	3.01305510	1.95590806		96.00000000	0.35770833	1.07779492	2.073840
97	0.65926164	1.29349430	0.85275117		97.00000000	0.35402062	0.45792365	2.095312
98	0.66900593	-0.70982748	-0.47487879		98.00000000	0.35040816	-0.24872934	2.116673
99	0.67909181	-3.16995690	-2.15269177		99.00000000	0.34686869	-1.09955879	2.138068
100	0.68879288	-5.99024150	-4.12603569		100.00000000	0.34340000	-2.05704893	2.159412
101	0.69909388	-9.40802000	-6.57708920		101.00000000	0.34000000	-3.19872680	2.180880
13:09 02/04/2018
Test Lot:	JK-PERC
Recipe:	Recipe_YJX-LID
Cell Name:	1-30-after
Test Order:	3
Test Condition:	Light
1	-0.29989117	9.01741310	-2.70424256		1.00000000	34.34000000	309.65796585	0.000000
2	-0.28998885	9.01120280	-2.61314834		2.00000000	17.17000000	154.72235208	0.021600
3	-0.27986473	9.01844410	-2.52394442		3.00000000	11.44666667	103.23112346	0.043011
4	-0.27006808	9.00788690	-2.43274272		4.00000000	8.58500000	77.33270904	0.064415
5	-0.25992534	9.01864240	-2.34417369		5.00000000	6.86800000	61.94003600	0.085751
6	-0.24979226	9.01970580	-2.25305270		6.00000000	5.72333333	51.62278286	0.107249
7	-0.23997925	9.00678250	-2.16144091		7.00000000	4.90571429	44.18470158	0.128630
8	-0.22978216	9.00960920	-2.07024746		8.00000000	4.29250000	38.67374749	0.150020
9	-0.21995427	9.01875110	-1.98371281		9.00000000	3.81555556	34.41154586	0.171501
10	-0.20985618	9.01325890	-1.89148808		10.00000000	3.43400000	30.95153106	0.192958
11	-0.20000520	9.00789550	-1.80162594		11.00000000	3.12181818	28.12101195	0.214374
12	-0.18985428	9.01671700	-1.71186231		12.00000000	2.86166667	25.80283848	0.235773
13	-0.18007104	8.99908920	-1.62047535		13.00000000	2.64153846	23.77144024	0.257130
14	-0.16994466	9.02454850	-1.53367383		14.00000000	2.45285714	22.13592825	0.278620
15	-0.16013463	9.01193050	-1.44312216		15.00000000	2.28933333	20.63131289	0.300002
16	-0.14994276	9.01164720	-1.35123125		16.00000000	2.14625000	19.34124780	0.321386
17	-0.13982011	9.01564030	-1.26056782		17.00000000	2.02000000	18.21159341	0.342741
18	-0.13000709	9.01009460	-1.17137618		18.00000000	1.90777778	17.18925825	0.364213
19	-0.11987551	9.01895810	-1.08115220		19.00000000	1.80736842	16.30058006	0.385585
20	-0.11006697	9.00672530	-0.99134296		20.00000000	1.71700000	15.46454734	0.406966
21	-0.09988105	9.01381490	-0.90030932		21.00000000	1.63523810	14.73973351	0.428332
22	-0.09009409	9.00340270	-0.81115337		22.00000000	1.56090909	14.05349312	0.449818
23	-0.07991636	9.01626780	-0.72054729		23.00000000	1.49304348	13.46167984	0.471205
24	-0.07012270	9.01142020	-0.63190508		24.00000000	1.43083333	12.89384040	0.492589
25	-0.05995018	9.00809380	-0.54003682		25.00000000	1.37360000	12.37351764	0.514069
26	-0.04980669	9.00166890	-0.44834331		26.00000000	1.32076923	11.88912731	0.535460
27	-0.03999144	9.01406860	-0.36048560		27.00000000	1.27185185	11.46455984	0.556818
28	-0.02984572	9.02381420	-0.26932221		28.00000000	1.22642857	11.06706356	0.578194
29	-0.01999326	8.99377250	-0.17981480		29.00000000	1.18413793	10.64986716	0.599675
30	-0.00986019	9.01797680	-0.08891894		30.00000000	1.14466667	10.32257744	0.621055
31	-0.00066123	9.01157860	-0.00595873		31.00000000	1.10774194	9.98250352	0.642508
32	0.00950140	9.01292040	0.08563539		32.00000000	1.07312500	9.67199020	0.663892
33	0.01933647	9.00298880	0.17408600		33.00000000	1.04060606	9.36856471	0.685377
34	0.02947743	9.01839540	0.26583916		34.00000000	1.01000000	9.10857935	0.706755
35	0.03927677	9.01429560	0.35405242		35.00000000	0.98114286	8.84431174	0.728107
36	0.04946017	9.01544860	0.44590558		36.00000000	0.95388889	8.59973625	0.749473
37	0.05926843	9.00910570	0.53395559		37.00000000	0.92810811	8.36142405	0.770945
38	0.06939005	9.01921650	0.62584389		38.00000000	0.90368421	8.15052354	0.792317
39	0.07958907	9.00514510	0.71671111		39.00000000	0.88051282	7.92914571	0.813645
40	0.08937725	9.01647000	0.80586727		40.00000000	0.85850000	7.74063950	0.835031
41	0.09954426	9.01152990	0.89704611		41.00000000	0.83756098	7.54770577	0.856511
42	0.10933913	9.00975800	0.98511910		42.00000000	0.81761905	7.36654976	0.877891
43	0.11947712	9.01464270	1.07704355		43.00000000	0.79860465	7.19913559	0.899246
44	0.12933451	9.01133160	1.16547616		44.00000000	0.78045455	7.03293471	0.920620
45	0.13947102	9.01798820	1.25774801		45.00000000	0.76311111	6.88172700	0.942107
46	0.14928599	9.00600150	1.34446985		46.00000000	0.74652174	6.72317590	0.963497
47	0.15939718	9.01871970	1.43755849		47.00000000	0.73063830	6.58942201	0.984861
48	0.16956940	9.01923370	1.52938605		48.00000000	0.71541667	6.45251011	1.006213
49	0.17939480	9.01649190	1.61751176		49.00000000	0.70081633	6.31890473	1.027726
50	0.18953055	9.00624660	1.70695887		50.00000000	0.68680000	6.18549016	1.049106
51	0.19931501	9.03612710	1.80103576		51.00000000	0.67333333	6.08432558	1.070491
52	0.20946193	9.00977420	1.88720469		52.00000000	0.66038462	5.94991627	1.091842
53	0.21928807	9.00565910	1.97483360		53.00000000	0.64792453	5.83498742	1.113330
54	0.22942010	9.00688740	2.06636101		54.00000000	0.63592593	5.72771321	1.134711
55	0.23923878	9.01971050	2.15786454		55.00000000	0.62436364	5.63157925	1.156098
56	0.24940804	9.00529860	2.24599387		56.00000000	0.61321429	5.52217775	1.177577
57	0.25952891	9.00421430	2.33685392		57.00000000	0.60245614	5.42464419	1.198970
58	0.26935279	9.01766490	2.42893320		58.00000000	0.59206897	5.33907953	1.220317
59	0.27952281	9.02424340	2.52248187		59.00000000	0.58203390	5.25241557	1.241683
60	0.28935191	8.99989030	2.60413545		60.00000000	0.57233333	5.15093722	1.263169
61	0.29954374	9.00308040	2.69681637		61.00000000	0.56295082	5.06829149	1.284550
62	0.30935496	9.01427360	2.78861025		62.00000000	0.55387097	4.99274444	1.346259
63	0.31952271	9.00675390	2.87786241		63.00000000	0.54507937	4.90939570	1.367632
64	0.32935625	9.01527980	2.96923875		64.00000000	0.53656250	4.83726107	1.388996
65	0.33950913	9.00404360	3.05695501		65.00000000	0.52830769	4.75690550	1.410373
66	0.34930620	9.00760650	3.14641280		66.00000000	0.52030303	4.68668496	1.431847
67	0.35945684	9.02285100	3.24332551		67.00000000	0.51253731	4.62454781	1.453227
68	0.36962533	9.00008010	3.32665758		68.00000000	0.50500000	4.54504045	1.474570
69	0.37942392	9.00683400	3.41740826		69.00000000	0.49768116	4.48253159	1.495962
70	0.38960356	9.01542660	3.51244230		70.00000000	0.49057143	4.42271071	1.517445
71	0.39941627	9.00646970	3.59733053		71.00000000	0.48366197	4.35608689	1.538827
72	0.40954235	9.00775150	3.68905572		72.00000000	0.47694444	4.29619703	1.560187
73	0.41936845	9.00528340	3.77653174		73.00000000	0.47041096	4.23618400	1.581562
74	0.42954364	9.01477720	3.87224021		74.00000000	0.46405405	4.18334391	1.603042
75	0.43933627	8.98967650	3.94949094		75.00000000	0.45786667	4.11607321	1.624427
76	0.44950920	9.00200940	4.04648604		76.00000000	0.45184211	4.06748688	1.645774
77	0.45964792	9.00766850	4.14035609		77.00000000	0.44597403	4.01718619	1.667148
78	0.46947852	8.98333360	4.21748216		78.00000000	0.44025641	3.95497020	1.688634
79	0.47962394	8.98872380	4.31120712		79.00000000	0.43468354	3.90725032	1.710009
80	0.48944113	8.98146920	4.39590043		80.00000000	0.42925000	3.85529565	1.731369
81	0.49956718	8.97314170	4.48268709		81.00000000	0.42395062	3.80416896	1.752723
82	0.50940371	8.94779870	4.55804185		82.00000000	0.41878049	3.74716350	1.774199
83	0.51954466	8.92172340	4.63523375		83.00000000	0.41373494	3.69122869	1.795592
84	0.52933282	8.87933830	4.70012518		84.00000000	0.40880952	3.62995806	1.816975
85	0.53945816	8.81925680	4.75762005		85.00000000	0.40400000	3.56297975	1.838329
86	0.54959834	8.74537090	4.80644133		86.00000000	0.39930233	3.49204694	1.859802
87	0.55942971	8.63925170	4.83305407		87.00000000	0.39471264	3.41002188	1.881184
88	0.56956911	8.47195630	4.82536461		88.00000000	0.39022727	3.30598840	1.902556
89	0.57934988	8.26267240	4.78697826		89.00000000	0.38584270	3.18809180	1.924053
90	0.58948338	7.95696070	4.69049609		90.00000000	0.38155556	3.03602256	1.945441
91	0.59930056	7.55811360	4.52958171		91.00000000	0.37736264	2.85214968	1.966798
92	0.60939014	7.02523660	4.28110992		92.00000000	0.37326087	2.62224592	1.988279
93	0.61921698	6.33863930	3.92499308		93.00000000	0.36924731	2.34052552	2.009786
94	0.62931478	5.44667860	3.42767534		94.00000000	0.36531915	1.98977599	2.031186
95	0.63946837	4.31996580	2.76248149		95.00000000	0.36147368	1.56155395	2.052540
96	0.64921784	2.98704460	1.93924264		96.00000000	0.35770833	1.06849075	2.073916
97	0.65934610	1.27951740	0.84364481		97.00000000	0.35402062	0.45297554	2.095396
98	0.66909260	-0.65983427	-0.44149023		98.00000000	0.35040816	-0.23121131	2.116767
99	0.67917252	-3.04361270	-2.06713811		99.00000000	0.34686869	-1.05573394	2.138138
100	0.68886393	-5.75831220	-3.96669357		100.00000000	0.34340000	-1.97740441	2.159521
101	0.69917083	-9.01845930	-6.30544367		101.00000000	0.34000000	-3.06627616	2.181007
13:09 02/04/2018
Test Lot:	JK-PERC
Recipe:	Recipe_YJX-LID
Cell Name:	1-30-after
Test Order:	4
Test Condition:	Light
1	-0.29983261	9.02330680	-2.70548163		1.00000000	34.34000000	309.86035551	0.000000
2	-0.29001889	9.02008440	-2.61599487		2.00000000	17.17000000	154.87484915	0.021585
3	-0.27983820	8.99633500	-2.51751819		3.00000000	11.44666667	102.97804797	0.042972
4	-0.27008399	9.02085400	-2.43638824		4.00000000	8.58500000	77.44403159	0.064337
5	-0.25988543	9.01028820	-2.34164262		5.00000000	6.86800000	61.88265936	0.085724
6	-0.24973750	9.02103040	-2.25288958		6.00000000	5.72333333	51.63036399	0.107272
7	-0.23997883	9.01226900	-2.16275377		7.00000000	4.90571429	44.21161678	0.128708
8	-0.22976913	9.00397210	-2.06883484		8.00000000	4.29250000	38.64955024	0.150065
9	-0.21992859	9.01851370	-1.98342900		9.00000000	3.81555556	34.41064005	0.171443
10	-0.20975684	9.01237770	-1.89040787		10.00000000	3.43400000	30.94850502	0.192937
11	-0.19996914	9.01160530	-1.80204296		11.00000000	3.12181818	28.13259327	0.214326
12	-0.18979813	9.00498290	-1.70912892		12.00000000	2.86166667	25.76925940	0.235687
13	-0.18002756	9.01240440	-1.62248117		13.00000000	2.64153846	23.80661285	0.257063
14	-0.16986845	9.00783350	-1.53014671		14.00000000	2.45285714	22.09492874	0.278539
15	-0.16007034	9.00825880	-1.44195505		15.00000000	2.28933333	20.62290715	0.299916
16	-0.14988890	9.01998620	-1.35199581		16.00000000	2.14625000	19.35914538	0.321262
17	-0.13973650	9.02104090	-1.26056868		17.00000000	2.02000000	18.22250262	0.342625
18	-0.12994510	9.00749970	-1.17048045		18.00000000	1.90777778	17.18430776	0.364110
19	-0.11977259	9.00347610	-1.07836965		19.00000000	1.80736842	16.27259838	0.385493
20	-0.10996778	9.01059340	-0.99087495		20.00000000	1.71700000	15.47118887	0.406873
21	-0.09981612	9.00220780	-0.89856546		21.00000000	1.63523810	14.72075314	0.428232
22	-0.08996888	9.01975060	-0.81149689		22.00000000	1.56090909	14.07901071	0.449703
23	-0.07984700	9.00709060	-0.71918917		23.00000000	1.49304348	13.44797788	0.471098
24	-0.07003847	9.01355080	-0.63129529		24.00000000	1.43083333	12.89688894	0.492475
25	-0.05986448	9.00591560	-0.53913442		25.00000000	1.37360000	12.37052567	0.513907
26	-0.04976492	9.01782510	-0.44877134		26.00000000	1.32076923	11.91046592	0.535369
27	-0.03989833	9.01204400	-0.35956552		27.00000000	1.27185185	11.46198485	0.556729
28	-0.02977347	9.01868060	-0.26851738		28.00000000	1.22642857	11.06076756	0.578111
29	-0.01996568	9.01914980	-0.18007344		29.00000000	1.18413793	10.67991738	0.599470
30	-0.00983635	9.01288510	-0.08865388		30.00000000	1.14466667	10.31674914	0.620957
31	-0.00058977	9.00499150	-0.00531089		31.00000000	1.10774194	9.97520671	0.642454
32	0.00955424	9.00810910	0.08606559		32.00000000	1.07312500	9.66682708	0.663867
33	0.01936770	9.01154990	0.17453299		33.00000000	1.04060606	9.37747344	0.685236
34	0.02951535	8.99760820	0.26556753		34.00000000	1.01000000	9.08758428	0.706707
35	0.03933848	9.01787660	0.35474959		35.00000000	0.98114286	8.84782521	0.728100
36	0.04950177	9.01910110	0.44646143		36.00000000	0.95388889	8.60322033	0.749479
37	0.05927876	9.01113410	0.53416882		37.00000000	0.92810811	8.36330662	0.770840
38	0.06944129	9.01510140	0.62602026		38.00000000	0.90368421	8.14680479	0.792322
39	0.07957108	9.00837900	0.71680641		39.00000000	0.88051282	7.93199320	0.813698
40	0.08942027	9.00622460	0.80533900		40.00000000	0.85850000	7.73184382	0.835091
41	0.09957015	9.01016330	0.89714329		41.00000000	0.83756098	7.54656116	0.856572
42	0.10937021	9.00747970	0.98514995		42.00000000	0.81761905	7.36468697	0.877946
43	0.11953870	9.00846960	1.07686074		43.00000000	0.79860465	7.19420572	0.899314
44	0.12934472	9.01511290	1.16605725		44.00000000	0.78045455	7.03588584	0.920692
45	0.13953851	9.01075360	1.25734713		45.00000000	0.76311111	6.87620619	0.942172
46	0.14934677	9.02070330	1.34721290		46.00000000	0.74652174	6.73415112	0.963560
47	0.15949069	9.00657650	1.43646510		47.00000000	0.73063830	6.58054972	0.984910
48	0.16965398	9.00217440	1.52725472		48.00000000	0.71541667	6.44030560	1.006285
49	0.17947935	9.02555660	1.61990103		49.00000000	0.70081633	6.32525742	1.027769
50	0.18961583	8.99931050	1.70641173		50.00000000	0.68680000	6.18072645	1.049157
51	0.19940548	9.01035980	1.79671512		51.00000000	0.67333333	6.06697560	1.070517
52	0.20955536	9.02239700	1.89069165		52.00000000	0.66038462	5.95825217	1.091894
53	0.21938072	9.00615310	1.97577635		53.00000000	0.64792453	5.83530750	1.113384
54	0.22951944	9.01141170	2.06829417		54.00000000	0.63592593	5.73059033	1.134772
55	0.23936120	9.02193360	2.15950085		55.00000000	0.62436364	5.63296727	1.156120
56	0.24947982	9.00801180	2.24731716		56.00000000	0.61321429	5.52384152	1.177498
57	0.25963193	9.01581380	2.34079314		57.00000000	0.60245614	5.43163238	1.198966
58	0.26944315	9.01649670	2.42943327		58.00000000	0.59206897	5.33838787	1.220351
59	0.27961537	9.00262360	2.51727193		59.00000000	0.58203390	5.23983211	1.241698
60	0.28942287	9.02828500	2.61299216		60.00000000	0.57233333	5.16718845	1.263088
61	0.29951471	9.00668720	2.69763530		61.00000000	0.56295082	5.07032194	1.284566
62	0.30933848	8.99406050	2.78220900		62.00000000	0.55387097	4.98154899	1.346189
63	0.31949568	9.02737430	2.88420709		63.00000000	0.54507937	4.92063545	1.367688
64	0.32932687	9.00684070	2.96619466		64.00000000	0.53656250	4.83273296	1.389082
65	0.33946472	9.00880150	3.05817028		65.00000000	0.52830769	4.75941913	1.410477
66	0.34927210	9.00623800	3.14562766		66.00000000	0.52030303	4.68597292	1.431838
67	0.35942110	9.00783820	3.23760711		67.00000000	0.51253731	4.61685319	1.453326
68	0.36961031	9.00448230	3.32814949		68.00000000	0.50500000	4.54726356	1.474712
69	0.37942886	9.00899030	3.41827092		69.00000000	0.49768116	4.48360474	1.496112
70	0.38955703	9.00347610	3.50736741		70.00000000	0.49057143	4.41684813	1.517458
71	0.39937782	9.01529310	3.60050810		71.00000000	0.48366197	4.36035444	1.538935
72	0.40952015	8.99777030	3.68476824		72.00000000	0.47694444	4.29143656	1.560329
73	0.41934985	9.00907520	3.77795433		73.00000000	0.47041096	4.23796770	1.581713
74	0.42948920	8.99817280	3.86461804		74.00000000	0.46405405	4.17563857	1.603198
75	0.43932933	8.99870490	3.95339499		75.00000000	0.45786667	4.12020702	1.624586
76	0.44951257	9.00066760	4.04591322		76.00000000	0.45184211	4.06688060	1.645936
77	0.45963478	8.99214460	4.13310240		77.00000000	0.44597403	4.01026293	1.667314
78	0.46948236	8.98379040	4.21773112		78.00000000	0.44025641	3.95517131	1.688795
79	0.47964850	8.99101160	4.31252523		79.00000000	0.43468354	3.90824479	1.710182
80	0.48943579	8.97328470	4.39184669		80.00000000	0.42925000	3.85178246	1.731540
81	0.49957883	8.96754260	4.47999444		81.00000000	0.42395062	3.80179522	1.752918
82	0.50941080	8.92850690	4.54827784		82.00000000	0.41878049	3.73908447	1.774406
83	0.51953149	8.91637900	4.63233967		83.00000000	0.41373494	3.68901753	1.795790
84	0.52931952	8.89252760	4.70698844		84.00000000	0.40880952	3.63534997	1.817142
85	0.53946412	8.81692410	4.75641420		85.00000000	0.40400000	3.56203734	1.838516
86	0.54961908	8.74670700	4.80735705		86.00000000	0.39930233	3.49258045	1.860001
87	0.55943465	8.62676720	4.82611249		87.00000000	0.39471264	3.40509409	1.881383
88	0.56955314	8.46491050	4.82121636		88.00000000	0.39022727	3.30323894	1.902724
89	0.57934713	8.26142120	4.78623066		89.00000000	0.38584270	3.18760903	1.924105
90	0.58947754	7.94819780	4.68528409		90.00000000	0.38155556	3.03267903	1.945580
91	0.59928268	7.55345870	4.52665697		91.00000000	0.37736264	2.85039310	1.966969
92	0.60939670	7.01317070	4.27380308		92.00000000	0.37326087	2.61774219	1.988446
93	0.61918920	6.34070590	3.92609661		93.00000000	0.36924731	2.34128861	2.009850
94	0.62928760	5.44202570	3.42459929		94.00000000	0.36531915	1.98807620	2.031341
95	0.63942546	4.31146960	2.75686343		95.00000000	0.36147368	1.55848280	2.052708
96	0.64920902	2.97656040	1.93240986		96.00000000	0.35770833	1.06474046	2.074109
97	0.65932083	1.29079680	0.85104922		97.00000000	0.35402062	0.45696868	2.095487
98	0.66905081	-0.66449773	-0.44458274		98.00000000	0.35040816	-0.23284543	2.116972
99	0.67914176	-3.03430060	-2.06072025		99.00000000	0.34686869	-1.05250386	2.138414
100	0.68888217	-5.73919150	-3.95362669		100.00000000	0.34340000	-1.97083836	2.159813
101	0.69913685	-8.98736190	-6.28339589		101.00000000	0.34000000	-3.05570305	2.181185
