# Supplementary material for: Study on the Electrical Injection Regeneration of Industrialized B-Doped Czochralski Silicon PERC Solar Cells
Source: Hindawi journal article supplement (doi:10.1155/2019/5357370), 2019-06-20
Supplement: f1 [file 5357370.f1.zip › section3.2/IVRawData_1-30.csv]

11:16 02/04/2018
Test Lot:	JK-PERC
Recipe:	Recipe_YJX-LID
Cell Name:	1-30
Test Order:	2
Test Condition:	Light
1	-0.29987687	9.02675630	-2.70691543		1.00000000	34.34000000	309.97881134	0.000000
2	-0.29006091	9.03147600	-2.61967815		2.00000000	17.17000000	155.07044292	0.061789
3	-0.27991006	9.02982710	-2.52753945		3.00000000	11.44666667	103.36142087	0.083208
4	-0.27010602	9.02960210	-2.43894989		4.00000000	8.58500000	77.51913403	0.104627
5	-0.25995141	9.02897070	-2.34709366		5.00000000	6.86800000	62.01097077	0.126132
6	-0.24977598	9.03970810	-2.25790195		6.00000000	5.72333333	51.73726269	0.147523
7	-0.23996302	9.03373240	-2.16776171		7.00000000	4.90571429	44.31691009	0.168913
8	-0.22981809	9.02066990	-2.07311313		8.00000000	4.29250000	38.72122555	0.190403
9	-0.22000365	9.03221700	-1.98712071		9.00000000	3.81555556	34.46292575	0.211783
10	-0.20984979	9.02629760	-1.89416666		10.00000000	3.43400000	30.99630596	0.233139
11	-0.20003013	9.03400420	-1.80707303		11.00000000	3.12181818	28.20251857	0.254511
12	-0.18987629	9.02892110	-1.71437804		12.00000000	2.86166667	25.83776255	0.275988
13	-0.18010055	9.02198890	-1.62486516		13.00000000	2.64153846	23.83193068	0.297375
14	-0.16998316	9.03470330	-1.53574742		14.00000000	2.45285714	22.16083652	0.318731
15	-0.16014415	9.02726080	-1.44566301		15.00000000	2.28933333	20.66640906	0.340116
16	-0.14996201	9.03386880	-1.35473712		16.00000000	2.14625000	19.38894091	0.361604
17	-0.13981485	9.03057000	-1.26260779		17.00000000	2.02000000	18.24175140	0.382981
18	-0.12998553	9.03546430	-1.17447962		18.00000000	1.90777778	17.23765800	0.404335
19	-0.11984879	9.02850530	-1.08205544		19.00000000	1.80736842	16.31783537	0.425719
20	-0.11003508	9.02809140	-0.99340676		20.00000000	1.71700000	15.50123293	0.447196
21	-0.09987602	9.02650640	-0.90153150		21.00000000	1.63523810	14.76048713	0.468587
22	-0.09008092	9.03716370	-0.81407599		22.00000000	1.56090909	14.10619098	0.489940
23	-0.07991739	9.01870920	-0.72075174		23.00000000	1.49304348	13.46532495	0.511308
24	-0.07008210	9.03664590	-0.63330710		24.00000000	1.43083333	12.92993418	0.532804
25	-0.05995876	9.02410130	-0.54107395		25.00000000	1.37360000	12.39550555	0.554183
26	-0.04979449	9.03487010	-0.44988676		26.00000000	1.32076923	11.93297843	0.575566
27	-0.04000609	9.02797130	-0.36117387		27.00000000	1.27185185	11.48224202	0.596946
28	-0.02984703	9.03118230	-0.26955397		28.00000000	1.22642857	11.07610001	0.618429
29	-0.02002811	9.04139900	-0.18108217		29.00000000	1.18413793	10.70626351	0.639807
30	-0.00988915	9.02247620	-0.08922460		30.00000000	1.14466667	10.32772776	0.661168
31	-0.00066345	9.03897570	-0.00599688		31.00000000	1.10774194	10.01285244	0.682658
32	0.00949094	9.02564810	0.08566191		32.00000000	1.07312500	9.68564862	0.704139
33	0.01928948	9.04202180	0.17441592		33.00000000	1.04060606	9.40918269	0.725513
34	0.02942295	9.02154160	0.26544037		34.00000000	1.01000000	9.11175702	0.746894
35	0.03926540	9.02531430	0.35438259		35.00000000	0.98114286	8.85512266	0.768246
36	0.04939440	9.03407100	0.44623254		36.00000000	0.95388889	8.61749995	0.789718
37	0.05925174	9.02357860	0.53466274		37.00000000	0.92810811	8.37485646	0.811096
38	0.06935246	9.03940300	0.62690486		38.00000000	0.90368421	8.16876576	0.832481
39	0.07953505	9.03751560	0.71879927		39.00000000	0.88051282	7.95764835	0.853971
40	0.08934252	9.02992250	0.80675603		40.00000000	0.85850000	7.75218847	0.875342
41	0.09948046	9.03457160	0.89876332		41.00000000	0.83756098	7.56700460	0.896705
42	0.10931621	9.02534480	0.98661649		42.00000000	0.81761905	7.37929382	0.918090
43	0.11948317	9.03049950	1.07899271		43.00000000	0.79860465	7.21179890	0.939574
44	0.12924896	9.02639290	1.16665189		44.00000000	0.78045455	7.04468937	0.960960
45	0.13943602	9.03039930	1.25916294		45.00000000	0.76311111	6.89119804	0.982312
46	0.14924349	9.03704170	1.34871964		46.00000000	0.74652174	6.74634809	1.003692
47	0.15939111	9.02883050	1.43911532		47.00000000	0.73063830	6.59680935	1.025174
48	0.16956104	9.02652260	1.53054656		48.00000000	0.71541667	6.45772471	1.046553
49	0.17937446	9.02412990	1.61869843		49.00000000	0.70081633	6.32425757	1.067915
50	0.18952876	9.03211690	1.71184592		50.00000000	0.68680000	6.20325789	1.089285
51	0.19933847	9.01808170	1.79765061		51.00000000	0.67333333	6.07217501	1.110772
52	0.20943695	9.02135750	1.88940560		52.00000000	0.66038462	5.95756570	1.132158
53	0.21927568	9.04759690	1.98391796		53.00000000	0.64792453	5.86215995	1.153498
54	0.22940023	9.01414970	2.06784801		54.00000000	0.63592593	5.73233149	1.174879
55	0.23926128	9.03924940	2.16274238		55.00000000	0.62436364	5.64377863	1.196376
56	0.24938136	9.02543160	2.25077441		56.00000000	0.61321429	5.53452359	1.217758
57	0.25954756	9.02596570	2.34266737		57.00000000	0.60245614	5.43774846	1.239098
58	0.26937291	9.03652570	2.43419522		58.00000000	0.59206897	5.35024642	1.260480
59	0.27950937	9.02397920	2.52228674		59.00000000	0.58203390	5.25226179	1.281964
60	0.28934586	9.03313640	2.61370062		60.00000000	0.57233333	5.16996507	1.303360
61	0.29948080	9.03040790	2.70443378		61.00000000	0.56295082	5.08367553	1.324726
62	0.30930167	9.03672120	2.79507296		62.00000000	0.55387097	5.00517752	1.346093
63	0.31946939	9.02975370	2.88472991		63.00000000	0.54507937	4.92193241	1.367571
64	0.32925007	9.02887920	2.97275911		64.00000000	0.53656250	4.84455800	1.388954
65	0.33942297	9.02636910	3.06375701		65.00000000	0.52830769	4.76870023	1.410331
66	0.34920514	9.02299310	3.15087557		66.00000000	0.52030303	4.69469065	1.431698
67	0.35936093	9.02879710	3.24459692		67.00000000	0.51253731	4.62759541	1.453168
68	0.36953014	9.02868370	3.33637075		68.00000000	0.50500000	4.55948527	1.474549
69	0.37932196	9.02248570	3.42242696		69.00000000	0.49768116	4.49032114	1.495936
70	0.38949341	9.02258970	3.51423923		70.00000000	0.49057143	4.42622472	1.517413
71	0.39932543	9.01923470	3.60160977		71.00000000	0.48366197	4.36226084	1.538789
72	0.40947005	9.03243540	3.69851177		72.00000000	0.47694444	4.30796988	1.560144
73	0.41928348	9.01034830	3.77789019		73.00000000	0.47041096	4.23856658	1.581529
74	0.42941472	9.03726670	3.88073535		74.00000000	0.46405405	4.19378025	1.603007
75	0.43922889	9.01931860	3.96154530		75.00000000	0.45786667	4.12964534	1.624386
76	0.44938692	9.01646610	4.05188193		76.00000000	0.45184211	4.07401902	1.645726
77	0.45956132	9.01068690	4.14096317		77.00000000	0.44597403	4.01853231	1.667101
78	0.46940154	9.01714040	4.23265959		78.00000000	0.44025641	3.96985386	1.688588
79	0.47954914	8.99390980	4.31302171		79.00000000	0.43468354	3.90950459	1.709963
80	0.48937076	8.99008180	4.39948316		80.00000000	0.42925000	3.85899261	1.731320
81	0.49951538	8.98416230	4.48772725		81.00000000	0.42395062	3.80884115	1.752700
82	0.50933999	8.96343520	4.56543600		82.00000000	0.41878049	3.75371177	1.774179
83	0.51948464	8.95375440	4.65133788		83.00000000	0.41373494	3.70448104	1.795588
84	0.52927941	8.89500050	4.70794062		84.00000000	0.40880952	3.63636092	1.816942
85	0.53939873	8.85249520	4.77502467		85.00000000	0.40400000	3.57640806	1.838323
86	0.54952699	8.77046110	4.81960509		86.00000000	0.39930233	3.50206551	1.859825
87	0.55936426	8.67389970	4.85186949		87.00000000	0.39471264	3.42369788	1.881207
88	0.56946129	8.52214810	4.85303345		88.00000000	0.39022727	3.32557461	1.902573
89	0.57928288	8.31534390	4.81693636		89.00000000	0.38584270	3.20841471	1.923952
90	0.58940369	8.01839350	4.72607072		90.00000000	0.38155556	3.05946259	1.945432
91	0.59920967	7.63402800	4.57438340		91.00000000	0.37736264	2.88079694	1.966821
92	0.60935354	7.10371490	4.32867382		92.00000000	0.37326087	2.65153880	1.988288
93	0.61913425	6.41989330	3.97477582		93.00000000	0.36924731	2.37052834	2.009685
94	0.62920368	5.51934580	3.47279269		94.00000000	0.36531915	2.01632271	2.031167
95	0.63938105	4.36364940	2.79003474		95.00000000	0.36147368	1.57734443	2.052553
96	0.64912307	2.96599440	1.92529539		96.00000000	0.35770833	1.06096091	2.073922
97	0.65923345	1.19072520	0.78496588		97.00000000	0.35402062	0.42154127	2.095340
98	0.66898584	-0.87353969	-0.58438568		98.00000000	0.35040816	-0.30609544	2.116842
99	0.67903668	-3.41106580	-2.31623880		99.00000000	0.34686869	-1.18319191	2.138211
100	0.68878758	-6.34518430	-4.37048414		100.00000000	0.34340000	-2.17893629	2.159610
101	0.69897538	-9.88654140	-6.91044903		101.00000000	0.34000000	-3.36142408	2.181103
11:16 02/04/2018
Test Lot:	JK-PERC
Recipe:	Recipe_YJX-LID
Cell Name:	1-30
Test Order:	3
Test Condition:	Light
1	-0.29985619	9.03862090	-2.71028643		1.00000000	34.34000000	310.38624171	0.000000
2	-0.29007375	9.02497290	-2.61790773		2.00000000	17.17000000	154.95878469	0.061721
3	-0.27992067	9.03148170	-2.52809841		3.00000000	11.44666667	103.38036053	0.083248
4	-0.27010250	9.00858020	-2.43324003		4.00000000	8.58500000	77.33866102	0.104705
5	-0.25994718	9.04270650	-2.35062605		5.00000000	6.86800000	62.10530824	0.126086
6	-0.24982908	9.02686880	-2.25517433		6.00000000	5.72333333	51.66377910	0.147473
7	-0.24001466	9.01845840	-2.16456223		7.00000000	4.90571429	44.24198021	0.168946
8	-0.22983178	9.03539180	-2.07662018		8.00000000	4.29250000	38.78441930	0.190336
9	-0.22001141	9.01166250	-1.98266857		9.00000000	3.81555556	34.38449892	0.211673
10	-0.20987171	9.02856450	-1.89484027		10.00000000	3.43400000	31.00409049	0.233053
11	-0.20004985	9.01865860	-1.80418130		11.00000000	3.12181818	28.15461239	0.254535
12	-0.18986028	9.01593110	-1.71176720		12.00000000	2.86166667	25.80058950	0.275913
13	-0.18008977	9.02165410	-1.62470761		13.00000000	2.64153846	23.83104629	0.297277
14	-0.16997464	9.01442810	-1.53222417		14.00000000	2.45285714	22.11110435	0.318645
15	-0.16013862	9.03501610	-1.44685501		15.00000000	2.28933333	20.68416352	0.340126
16	-0.14998703	9.02724460	-1.35396961		16.00000000	2.14625000	19.37472372	0.361519
17	-0.13980044	9.03458120	-1.26303843		17.00000000	2.02000000	18.24985402	0.382854
18	-0.12999569	9.01214310	-1.17153976		18.00000000	1.90777778	17.19316634	0.404224
19	-0.11985450	9.01906390	-1.08097539		19.00000000	1.80736842	16.30077128	0.425702
20	-0.11003486	9.02458100	-0.99301851		20.00000000	1.71700000	15.49520558	0.447086
21	-0.09986913	9.01728340	-0.90054820		21.00000000	1.63523810	14.74540533	0.468482
22	-0.09008223	9.02706620	-0.81317824		22.00000000	1.56090909	14.09042970	0.489862
23	-0.07991649	9.01920220	-0.72078294		23.00000000	1.49304348	13.46606102	0.511349
24	-0.07007601	9.02960590	-0.63275876		24.00000000	1.43083333	12.91986111	0.532739
25	-0.05994227	9.03082080	-0.54132792		25.00000000	1.37360000	12.40473545	0.554099
26	-0.04977057	9.01290230	-0.44857729		26.00000000	1.32076923	11.90396404	0.575465
27	-0.03994647	9.02696230	-0.36059525		27.00000000	1.27185185	11.48095872	0.596935
28	-0.02981571	9.03371140	-0.26934649		28.00000000	1.22642857	11.07920177	0.618309
29	-0.01999904	9.01559260	-0.18030323		29.00000000	1.18413793	10.67570517	0.639689
30	-0.00987275	9.03818040	-0.08923170		30.00000000	1.14466667	10.34570383	0.661045
31	-0.00065674	9.01945300	-0.00592346		31.00000000	1.10774194	9.99122632	0.682636
32	0.00954005	9.02156540	0.08606620		32.00000000	1.07312500	9.68126737	0.704003
33	0.01930880	9.03205390	0.17439812		33.00000000	1.04060606	9.39881003	0.725398
34	0.02943257	9.02119830	0.26551707		34.00000000	1.01000000	9.11141028	0.746810
35	0.03928170	9.02525710	0.35452748		35.00000000	0.98114286	8.85506654	0.768274
36	0.04941292	9.00956150	0.44518875		36.00000000	0.95388889	8.59412061	0.789659
37	0.05925982	9.02815250	0.53500670		37.00000000	0.92810811	8.37910154	0.811020
38	0.06941038	9.00044440	0.62472430		38.00000000	0.90368421	8.13355949	0.832380
39	0.07950513	9.03956600	0.71869188		39.00000000	0.88051282	7.95945375	0.853874
40	0.08935724	9.01989170	0.80599265		40.00000000	0.85850000	7.74357702	0.875250
41	0.09951004	9.02728270	0.89830530		41.00000000	0.83756098	7.56089971	0.896621
42	0.10932419	9.02189250	0.98631109		42.00000000	0.81761905	7.37647115	0.917987
43	0.11949337	9.01865670	1.07766968		43.00000000	0.79860465	7.20234119	0.939461
44	0.12929189	9.02159880	1.16641956		44.00000000	0.78045455	7.04094779	0.960849
45	0.13946329	9.02815060	1.25909559		45.00000000	0.76311111	6.88948204	0.982228
46	0.14926033	9.01167770	1.34508599		46.00000000	0.74652174	6.72741331	1.003570
47	0.15942727	9.02527520	1.43887499		47.00000000	0.73063830	6.59421171	1.025026
48	0.16957486	9.01843170	1.52929929		48.00000000	0.71541667	6.45193635	1.046398
49	0.17938900	9.02675530	1.61930061		49.00000000	0.70081633	6.32609749	1.067777
50	0.18954553	9.01885220	1.70948312		50.00000000	0.68680000	6.19414769	1.089257
51	0.19930014	9.02903560	1.79948806		51.00000000	0.67333333	6.07955064	1.110646
52	0.20944549	9.01705460	1.88858142		52.00000000	0.66038462	5.95472413	1.132008
53	0.21928197	9.01650520	1.97715702		53.00000000	0.64792453	5.84201488	1.153389
54	0.22946975	9.01533890	2.06874756		54.00000000	0.63592593	5.73308774	1.174882
55	0.23925115	9.02606770	2.15949708		55.00000000	0.62436364	5.63554845	1.196279
56	0.24943149	9.02387050	2.25083746		56.00000000	0.61321429	5.53356630	1.217621
57	0.25952920	9.01179120	2.33882296		57.00000000	0.60245614	5.42920894	1.238998
58	0.26939175	9.01338290	2.42813099		58.00000000	0.59206897	5.33654429	1.260483
59	0.27953488	9.01980110	2.52134902		59.00000000	0.58203390	5.24983000	1.281855
60	0.28933337	9.03611470	2.61444952		60.00000000	0.57233333	5.17166965	1.303198
61	0.29949588	9.01567270	2.70015683		61.00000000	0.56295082	5.07538034	1.324584
62	0.30931747	9.03704930	2.79531723		62.00000000	0.55387097	5.00535924	1.346069
63	0.31945017	9.02527330	2.88312509		63.00000000	0.54507937	4.91949024	1.367448
64	0.32925463	9.02970120	2.97307093		64.00000000	0.53656250	4.84499905	1.388805
65	0.33939105	9.01454450	3.05945572		65.00000000	0.52830769	4.76245320	1.410179
66	0.34925807	9.03136830	3.15427826		66.00000000	0.52030303	4.69904829	1.431652
67	0.35939375	9.01967140	3.24161353		67.00000000	0.51253731	4.62291815	1.453037
68	0.36954206	9.02751640	3.33604701		68.00000000	0.50500000	4.55889578	1.474381
69	0.37937483	9.02794360	3.42497457		69.00000000	0.49768116	4.49303744	1.495754
70	0.38952762	9.01668930	3.51224952		70.00000000	0.49057143	4.42333015	1.517227
71	0.39933434	9.02073290	3.60228842		71.00000000	0.48366197	4.36298546	1.538605
72	0.40949234	9.01186940	3.69029149		72.00000000	0.47694444	4.29816104	1.559978
73	0.41933030	9.01990320	3.78231871		73.00000000	0.47041096	4.24306131	1.581340
74	0.42947865	9.01528070	3.87187058		74.00000000	0.46405405	4.18357756	1.602808
75	0.43929726	9.01325130	3.95949660		75.00000000	0.45786667	4.12686733	1.624189
76	0.44942698	9.01277730	4.05058528		76.00000000	0.45184211	4.07235227	1.645579
77	0.45955077	8.99772260	4.13491035		77.00000000	0.44597403	4.01275057	1.666923
78	0.46939692	9.00128360	4.22517480		78.00000000	0.44025641	3.96287281	1.688392
79	0.47957426	9.00004200	4.31618848		79.00000000	0.43468354	3.91217016	1.709758
80	0.48936313	8.98616220	4.39749646		80.00000000	0.42925000	3.85731012	1.731139
81	0.49951443	8.97877790	4.48502912		81.00000000	0.42395062	3.80655843	1.752620
82	0.50935239	8.95325090	4.56035974		82.00000000	0.41878049	3.74944678	1.774002
83	0.51949775	8.92641450	4.63725225		83.00000000	0.41373494	3.69316957	1.795361
84	0.52928513	8.89747620	4.70930185		84.00000000	0.40880952	3.63737301	1.816735
85	0.53942525	8.82637120	4.76116749		85.00000000	0.40400000	3.56585396	1.838211
86	0.54952967	8.76634980	4.81736931		86.00000000	0.39930233	3.50042386	1.859593
87	0.55933934	8.64055630	4.83300306		87.00000000	0.39471264	3.41053682	1.880945
88	0.56947207	8.48054220	4.82943192		88.00000000	0.39022727	3.30933885	1.902318
89	0.57930034	8.27056030	4.79113839		89.00000000	0.38584270	3.19113529	1.923796
90	0.58943158	7.95869780	4.69110782		90.00000000	0.38155556	3.03668536	1.945183
91	0.59923458	7.56243320	4.53167148		91.00000000	0.37736264	2.85377974	1.966533
92	0.60933822	7.01239970	4.27292315		92.00000000	0.37326087	2.61745441	1.988009
93	0.61915910	6.32727480	3.91758977		93.00000000	0.36924731	2.33632921	2.009528
94	0.62923151	5.39715960	3.39606288		94.00000000	0.36531915	1.97168575	2.030923
95	0.63936496	4.27060170	2.73047309		95.00000000	0.36147368	1.54371013	2.052270
96	0.64915973	2.87575630	1.86682518		96.00000000	0.35770833	1.02868199	2.073640
97	0.65929765	1.14969020	0.75798805		97.00000000	0.35402062	0.40701404	2.095139
98	0.66898006	-0.85461026	-0.57171722		98.00000000	0.35040816	-0.29946241	2.116552
99	0.67905694	-3.27837590	-2.22620391		99.00000000	0.34686869	-1.13716594	2.137907
100	0.68883467	-6.06002000	-4.17435188		100.00000000	0.34340000	-2.08101087	2.159296
101	0.69910431	-9.37666320	-6.55526566		101.00000000	0.34000000	-3.18806549	2.180782
11:16 02/04/2018
Test Lot:	JK-PERC
Recipe:	Recipe_YJX-LID
Cell Name:	1-30
Test Order:	4
Test Condition:	Light
1	-0.29985917	9.03064730	-2.70792240		1.00000000	34.34000000	310.11242828	0.000000
2	-0.28998667	9.02057740	-2.61584720		2.00000000	17.17000000	154.88331396	0.021576
3	-0.27988642	9.03963090	-2.53006993		3.00000000	11.44666667	103.47364170	0.042985
4	-0.27007869	9.02937220	-2.43864102		4.00000000	8.58500000	77.51716034	0.064338
5	-0.25994051	9.01359180	-2.34299765		5.00000000	6.86800000	61.90534848	0.085772
6	-0.24977699	9.04045490	-2.25809761		6.00000000	5.72333333	51.74153688	0.107275
7	-0.23996031	9.02750970	-2.16624403		7.00000000	4.90571429	44.28638330	0.128661
8	-0.22982286	9.02061940	-2.07314455		8.00000000	4.29250000	38.72100877	0.150007
9	-0.22001438	9.02497290	-1.98562382		9.00000000	3.81555556	34.43528549	0.171396
10	-0.20982334	9.02244190	-1.89311889		10.00000000	3.43400000	30.98306548	0.192879
11	-0.20000668	9.01247880	-1.80255596		11.00000000	3.12181818	28.13532018	0.214255
12	-0.18986177	9.01547720	-1.71169446		12.00000000	2.86166667	25.79929059	0.235609
13	-0.18009052	9.02919580	-1.62607257		13.00000000	2.64153846	23.85096798	0.256992
14	-0.16995230	9.01715950	-1.53248700		14.00000000	2.45285714	22.11780409	0.278466
15	-0.16011852	9.03001120	-1.44587203		15.00000000	2.28933333	20.67270564	0.299846
16	-0.14993343	9.01880840	-1.35222088		16.00000000	2.14625000	19.35661753	0.321218
17	-0.13984361	9.01987460	-1.26137183		17.00000000	2.02000000	18.22014669	0.342594
18	-0.12998749	9.02216430	-1.17276849		18.00000000	1.90777778	17.21228456	0.364072
19	-0.11984855	9.02469640	-1.08159678		19.00000000	1.80736842	16.31095128	0.385442
20	-0.11002742	9.00814150	-0.99114257		20.00000000	1.71700000	15.46697896	0.406844
21	-0.09985424	9.03290370	-0.90197372		21.00000000	1.63523810	14.77094824	0.428189
22	-0.09004874	9.00959780	-0.81130291		22.00000000	1.56090909	14.06316311	0.449668
23	-0.07991351	9.03805350	-0.72226260		23.00000000	1.49304348	13.49420683	0.471055
24	-0.07009090	9.01192470	-0.63165389		24.00000000	1.43083333	12.89456226	0.492437
25	-0.05992515	9.02403070	-0.54076639		25.00000000	1.37360000	12.39540857	0.513918
26	-0.04975867	9.01544380	-0.44859645		26.00000000	1.32076923	11.90732077	0.535306
27	-0.03995019	9.02480790	-0.36054277		27.00000000	1.27185185	11.47821864	0.556659
28	-0.02979635	9.02271370	-0.26884397		28.00000000	1.22642857	11.06571387	0.578041
29	-0.02001319	9.01609800	-0.18044086		29.00000000	1.18413793	10.67630363	0.599517
30	-0.00985935	9.02276520	-0.08895862		30.00000000	1.14466667	10.32805857	0.620888
31	-0.00061655	9.02687740	-0.00556552		31.00000000	1.10774194	9.99945064	0.642358
32	0.00954824	9.01994510	0.08612459		32.00000000	1.07312500	9.67952859	0.663744
33	0.01935048	9.02985290	0.17473199		33.00000000	1.04060606	9.39651965	0.685228
34	0.02949881	9.01835440	0.26603076		34.00000000	1.01000000	9.10853794	0.706617
35	0.03932264	9.02541540	0.35490317		35.00000000	0.98114286	8.85522185	0.727962
36	0.04946800	9.01915550	0.44615955		36.00000000	0.95388889	8.60327222	0.749332
37	0.05928066	9.02559380	0.53504316		37.00000000	0.92810811	8.37672679	0.770826
38	0.06945058	9.02760310	0.62697227		38.00000000	0.90368421	8.15810238	0.792202
39	0.07955351	9.02116010	0.71766492		39.00000000	0.88051282	7.94324712	0.813598
40	0.08935203	9.02571390	0.80646590		40.00000000	0.85850000	7.74857538	0.834998
41	0.09954353	9.03353790	0.89923029		41.00000000	0.83756098	7.56613882	0.856484
42	0.10933536	9.01660250	0.98583348		42.00000000	0.81761905	7.37214595	0.877869
43	0.11950155	9.01542380	1.07735712		43.00000000	0.79860465	7.19975938	0.899223
44	0.12931049	9.02668570	1.16724515		44.00000000	0.78045455	7.04491788	0.920597
45	0.13948488	8.99122910	1.25414051		45.00000000	0.76311111	6.86130683	0.942079
46	0.14928563	9.03745940	1.34916282		46.00000000	0.74652174	6.74665991	0.963447
47	0.15944216	9.02247140	1.43856233		47.00000000	0.73063830	6.59216315	0.984800
48	0.16955104	9.02456090	1.53012369		48.00000000	0.71541667	6.45632128	1.006213
49	0.17937189	9.01212120	1.61652121		49.00000000	0.70081633	6.31584167	1.027713
50	0.18955892	9.02021220	1.70986168		50.00000000	0.68680000	6.19508174	1.049089
51	0.19933139	9.02420230	1.79880679		51.00000000	0.67333333	6.07629622	1.070500
52	0.20945665	9.03474620	1.89238767		52.00000000	0.66038462	5.96640739	1.091853
53	0.21928048	9.01422790	1.97664422		53.00000000	0.64792453	5.84053936	1.113329
54	0.22943701	9.02372360	2.07037616		54.00000000	0.63592593	5.73841979	1.134717
55	0.23927571	9.02869320	2.16034698		55.00000000	0.62436364	5.63718772	1.156099
56	0.24942851	9.01206970	2.24786712		56.00000000	0.61321429	5.52632988	1.177589
57	0.25957984	9.02562900	2.34287133		57.00000000	0.60245614	5.43754561	1.198971
58	0.26938206	9.01762680	2.42918688		58.00000000	0.59206897	5.33905697	1.220314
59	0.27952743	9.01968480	2.52124931		59.00000000	0.58203390	5.24976231	1.241703
60	0.28936687	9.01852990	2.60966377		60.00000000	0.57233333	5.16160528	1.263187
61	0.29949737	9.02382850	2.70261290		61.00000000	0.56295082	5.07997165	1.284580
62	0.30932564	9.01240830	2.78776897		62.00000000	0.55387097	4.99171131	1.305944
63	0.31946951	9.03109650	2.88515997		63.00000000	0.54507937	4.92266435	1.327317
64	0.32929185	9.00757880	2.96612229		64.00000000	0.53656250	4.83312900	1.348790
65	0.33944911	9.01838970	3.06128436		65.00000000	0.52830769	4.76448465	1.370185
66	0.34925807	9.02219960	3.15107602		66.00000000	0.52030303	4.69427779	1.391534
67	0.35938108	9.01094150	3.23836189		67.00000000	0.51253731	4.61844375	1.412900
68	0.36957780	9.02017500	3.33365643		68.00000000	0.50500000	4.55518838	1.434385
69	0.37938377	9.00793080	3.41746275		69.00000000	0.49768116	4.48307744	1.455761
70	0.38953954	9.01877500	3.51316946		70.00000000	0.49057143	4.42435334	1.477131
71	0.39935368	9.02370170	3.60364848		71.00000000	0.48366197	4.36442136	1.498507
72	0.40952286	9.00457290	3.68757845		72.00000000	0.47694444	4.29468102	1.519984
73	0.41933030	9.02128510	3.78289819		73.00000000	0.47041096	4.24371137	1.541369
74	0.42946303	9.00437450	3.86704596		74.00000000	0.46405405	4.17851649	1.562725
75	0.43929800	9.01239680	3.95912789		75.00000000	0.45786667	4.12647608	1.584100
76	0.44945973	9.00128080	4.04571324		76.00000000	0.45184211	4.06715767	1.605580
77	0.45958501	8.99793620	4.13531660		77.00000000	0.44597403	4.01284583	1.626956
78	0.46943858	8.99794480	4.22398243		78.00000000	0.44025641	3.96140288	1.648301
79	0.47958320	9.01193620	4.32197320		79.00000000	0.43468354	3.91734037	1.669681
80	0.48939067	8.97718910	4.39335259		80.00000000	0.42925000	3.85345842	1.691154
81	0.49951071	8.97199920	4.48160969		81.00000000	0.42395062	3.80368460	1.712525
82	0.50934422	8.93766210	4.55234653		82.00000000	0.41878049	3.74291849	1.733913
83	0.51947987	8.92430500	4.63599680		83.00000000	0.41373494	3.69229679	1.755253
84	0.52925462	8.88166430	4.70066186		84.00000000	0.40880952	3.63090895	1.776730
85	0.53941560	8.82219790	4.75883117		85.00000000	0.40400000	3.56416795	1.798097
86	0.54954159	8.75165840	4.80940027		86.00000000	0.39930233	3.49455755	1.819484
87	0.55936468	8.62971400	4.82715721		87.00000000	0.39471264	3.40625723	1.840972
88	0.56951970	8.47066210	4.82420894		88.00000000	0.39022727	3.30548337	1.862349
89	0.57931226	8.26040080	4.78535146		89.00000000	0.38584270	3.18721532	1.883690
90	0.58945984	7.95555970	4.68948295		90.00000000	0.38155556	3.03548800	1.905070
91	0.59926361	7.55817840	4.52934127		91.00000000	0.37736264	2.85217413	1.926565
92	0.60938883	7.00415710	4.26825510		92.00000000	0.37326087	2.61437777	1.947932
93	0.61914939	6.31883380	3.91230209		93.00000000	0.36924731	2.33321239	1.969285
94	0.62925977	5.39248850	3.39327607		94.00000000	0.36531915	1.96997931	1.990756
95	0.63938582	4.24984980	2.71729370		95.00000000	0.36147368	1.53620886	2.012247
96	0.64917690	2.84492590	1.84686018		96.00000000	0.35770833	1.01765370	2.033651
97	0.65925002	1.11971650	0.73817313		97.00000000	0.35402062	0.39640273	2.054992
98	0.66900909	-0.88571781	-0.59255327		98.00000000	0.35040816	-0.31036275	2.076405
99	0.67907482	-3.31694030	-2.25245064		99.00000000	0.34686869	-1.15054273	2.097909
100	0.68881750	-6.10319760	-4.20398931		100.00000000	0.34340000	-2.09583806	2.119285
101	0.69913930	-9.42181970	-6.58716443		101.00000000	0.34000000	-3.20341870	2.140642
