# Supplementary material for: Study on the Electrical Injection Regeneration of Industrialized B-Doped Czochralski Silicon PERC Solar Cells
Source: Hindawi journal article supplement (doi:10.1155/2019/5357370), 2019-06-20
Supplement: f1 [file 5357370.f1.zip › section3.3/IVMeasurementData.csv]

[DateTime]	[Grade]	[CellName]	[Order]	[Area (cm2)]	[Isc (A)]	[Jsc (mA/cm2)]	[Voc (V)]	[FF (%)]	[Eff (%)]	[Pmpp (W)]	[Rss (ohm)]	[Rshs (ohm)]	[Vmpp (V)]	[Impp (A)]	[Jmpp (mA/cm2)]	[IVLV1 (A)]	[IVLV2 (A)]	[Irradiance (W/m2)]	[Temp (deg C)]	[Rsh (ohm)]	[IVRV1 (mA)]	[IVRV2 (mA)]	[Rs (ohm)]	TkCurrent (%/K)	TkVoltage (%/K)	TkPower (%/K)	[Compensation]
0:01:18	Light	3-14-2.5h	1	244.67	9.10039	37.19	0.6701	81.68%	20.36%	4.9812	1.8375	193.1507	0.5738	8.6808	35.48	9.1177	9.0621	51	24.99	0	0	0	0	0	0	0	0
0:01:27	Light	3-14-2.5h	2	244.67	9.09873	37.19	0.6702	81.68%	20.36%	4.9805	1.8448	868.331	0.5732	8.6894	35.51	9.1045	9.0611	51	25.08	0	0	0	0	0	0	0	0
0:01:47	Light	3-14-2.5h	3	244.67	9.09619	37.18	0.6701	81.67%	20.35%	4.9782	1.8522	39.5164	0.573	8.6886	35.51	9.1162	9.0721	51	25.09	0	0	0	0	0	0	0	0
0:09:26	Light	3-8-1.5h	1	244.67	9.10453	37.21	0.6693	81.65%	20.34%	4.9757	1.8203	697.1635	0.5719	8.7008	35.56	9.1028	9.0756	51	24.98	0	0	0	0	0	0	0	0
0:09:33	Light	3-8-1.5h	2	244.67	9.10651	37.22	0.6692	81.71%	20.35%	4.9795	1.8081	79.3837	0.5729	8.6915	35.52	9.1019	9.0595	51	25.06	0	0	0	0	0	0	0	0
0:09:50	Light	3-8-1.5h	3	244.67	9.09996	37.19	0.6692	81.68%	20.33%	4.974	1.8228	430.4851	0.5719	8.6966	35.54	9.1078	9.0528	51	25.09	0	0	0	0	0	0	0	0
0:11:26	Light	3-6-1h	1	244.67	9.11535	37.26	0.6697	81.03%	20.22%	4.9468	1.8937	251.2737	0.5698	8.6813	35.48	9.1056	9.0558	51	25.01	0	0	0	0	0	0	0	0
0:11:33	Light	3-6-1h	2	244.67	9.10827	37.23	0.6697	81.13%	20.23%	4.9486	1.8766	793.7875	0.5703	8.6768	35.46	9.1033	9.0589	51	25.09	0	0	0	0	0	0	0	0
0:11:53	Light	3-6-1h	3	244.67	9.10114	37.2	0.6697	81.08%	20.20%	4.9419	1.8986	183.2742	0.5695	8.6776	35.47	9.0945	9.0627	51	25.1	0	0	0	0	0	0	0	0
0:13:12	Light	3-12-2h	1	244.67	9.1018	37.2	0.6683	80.57%	20.03%	4.901	1.9598	84.2336	0.5685	8.6205	35.23	9.0985	9.0269	51	25.02	0	0	0	0	0	0	0	0
0:13:27	Light	3-12-2h	2	244.67	9.09326	37.17	0.6684	80.62%	20.03%	4.8999	1.9623	73.6193	0.5685	8.6184	35.22	9.0956	9.0166	51	25.09	0	0	0	0	0	0	0	0
0:13:48	Light	3-12-2h	3	244.67	9.08334	37.12	0.6684	80.70%	20.02%	4.8993	1.9623	300.7611	0.5686	8.6165	35.22	9.0958	9.0179	51	25.08	0	0	0	0	0	0	0	0
0:15:09	Light	3-14-3h	1	244.67	9.10318	37.21	0.6701	81.68%	20.36%	4.9824	1.8497	82.2709	0.573	8.6947	35.54	9.1012	9.0643	51	25.03	0	0	0	0	0	0	0	0
0:15:23	Light	3-14-3h	2	244.67	9.10192	37.2	0.6701	81.65%	20.35%	4.98	1.8546	228.6548	0.5728	8.6944	35.54	9.0991	9.0489	51	25.1	0	0	0	0	0	0	0	0
0:15:41	Light	3-14-3h	3	244.67	9.09941	37.19	0.67	81.66%	20.35%	4.9787	1.8522	145.636	0.573	8.6895	35.52	9.0964	9.0673	51	25.1	0	0	0	0	0	0	0	0
0:16:49	Light	3-14-3h	4	244.67	9.08645	37.14	0.6691	81.71%	20.30%	4.9677	1.813	151.3227	0.572	8.6853	35.5	9.0977	9.0753	51	25.03	0	0	0	0	0	0	0	0
0:17:07	Light	3-8-2h	1	244.67	9.08997	37.15	0.6691	81.63%	20.29%	4.9649	1.8228	102.893	0.5717	8.6845	35.49	9.0887	9.0601	51	25.08	0	0	0	0	0	0	0	0
0:17:16	Light	3-8-2h	2	244.67	9.09007	37.15	0.6691	81.69%	20.31%	4.9686	1.8155	262.7571	0.572	8.6858	35.5	9.0867	9.0536	51	25.09988	0	0	0	0	0	0	0	0
0:33:44	Light	3-18-4h	1	244.67	9.09554	37.17	0.6707	81.40%	20.30%	4.9658	1.9011	40.6212	0.5727	8.6703	35.44	9.1081	9.0506	51	24.99	0	0	0	0	0	0	0	0
0:33:59	Light	3-18-4h	2	244.67	9.11325	37.25	0.6707	81.23%	20.29%	4.9651	1.8962	60.3059	0.5726	8.6718	35.44	9.1031	9.058	51	25.08	0	0	0	0	0	0	0	0
0:34:22	Light	3-18-4h	3	244.67	9.10482	37.21	0.6707	81.29%	20.29%	4.964	1.8937	52.2825	0.5727	8.667	35.42	9.0826	9.049	51	25.05	0	0	0	0	0	0	0	0
0:35:36	Light	3-14-3h	1	244.67	9.10046	37.19	0.6699	81.67%	20.35%	4.9788	1.8448	56.7905	0.5729	8.6911	35.52	9.0963	9.0706	51	25.04	0	0	0	0	0	0	0	0
0:35:54	Light	3-14-3h	2	244.67	9.11352	37.25	0.67	81.52%	20.35%	4.9779	1.8448	550.4047	0.5729	8.6886	35.51	9.1046	9.0699	51	25.1	0	0	0	0	0	0	0	0
0:36:13	Light	3-14-3h	3	244.67	9.10218	37.2	0.67	81.60%	20.34%	4.9764	1.8448	141.2406	0.5729	8.6866	35.5	9.0978	9.0698	51	25.1	0	0	0	0	0	0	0	0
0:44:50	Light	3-6-1.5h	1	244.67	9.09151	37.16	0.6696	81.20%	20.20%	4.9433	1.8889	193.3363	0.5698	8.6759	35.46	9.0754	9.0558	51	24.99	0	0	0	0	0	0	0	0
0:44:58	Light	3-6-1.5h	2	244.67	9.10336	37.21	0.6696	81.14%	20.22%	4.9462	1.8766	436.6268	0.5702	8.6737	35.45	9.1128	9.0564	51	25.07	0	0	0	0	0	0	0	0
0:45:16	Light	3-6-1.5h	3	244.67	9.09716	37.18	0.6696	81.09%	20.19%	4.9393	1.8864	86.9086	0.5694	8.674	35.45	9.0981	9.0497	51	25.1	0	0	0	0	0	0	0	0
0:46:33	Light	3-12-2.5h	1	244.67	9.0984	37.19	0.6683	80.58%	20.03%	4.8997	1.9525	50.833	0.5686	8.6176	35.22	9.0967	9.0171	51	25.02	0	0	0	0	0	0	0	0
0:46:47	Light	3-12-2.5h	2	244.67	9.08198	37.12	0.6682	80.72%	20.02%	4.8986	1.9574	223.4574	0.5684	8.6188	35.23	9.1047	9.0157	51	25.1	0	0	0	0	0	0	0	0
0:47:05	Light	3-12-2.5h	3	244.67	9.08883	37.15	0.6683	80.61%	20.01%	4.8966	1.9598	230.479	0.5684	8.6144	35.21	9.0971	9.0232	51	25.1	0	0	0	0	0	0	0	0
0:48:25	Light	3-8-2.5	1	244.67	9.09725	37.18	0.6689	81.53%	20.28%	4.9612	1.9329	186.1435	0.5716	8.679	35.47	9.0882	9.0599	51	25.04	0	0	0	0	0	0	0	0
0:48:41	Light	3-8-2.5	2	244.67	9.09668	37.18	0.6688	81.49%	20.26%	4.9579	1.9402	116.5414	0.5714	8.6772	35.46	9.1043	9.0584	51	25.1	0	0	0	0	0	0	0	0
0:49:00	Light	3-8-2h	1	244.67	9.09379	37.17	0.6689	81.49%	20.26%	4.9571	1.9402	170.3034	0.5716	8.6728	35.45	9.0918	9.0566	51	25.09	0	0	0	0	0	0	0	0
0:57:52	Light	3-16-4h	1	244.67	9.11397	37.25	0.6702	81.25%	20.28%	4.9631	1.9035	55.6969	0.5709	8.6931	35.53	9.1115	9.0532	51	24.99	0	0	0	0	0	0	0	0
0:58:02	Light	3-16-4h	2	244.67	9.09983	37.19	0.6701	81.35%	20.28%	4.9608	1.9035	120.2989	0.5709	8.6901	35.52	9.1209	9.06	51	25.08	0	0	0	0	0	0	0	0
0:58:21	Light	3-16-4h	3	244.67	9.10461	37.21	0.6702	81.37%	20.29%	4.9649	1.8937	87.9678	0.5712	8.6922	35.53	9.1079	9.0633	51	25.09	0	0	0	0	0	0	0	0
1:17:15	Light	3-6-2h	1	244.67	9.10205	37.2	0.6695	81.14%	20.21%	4.9446	1.8791	79.7246	0.5697	8.6791	35.47	9.1223	9.0695	51	25.02	0	0	0	0	0	0	0	0
1:17:25	Light	3-6-2h	2	244.67	9.0991	37.19	0.6694	81.14%	20.20%	4.9421	1.8889	1829.5695	0.5692	8.6826	35.49	9.1091	9.0597	51	25.09988	0	0	0	0	0	0	0	0
1:17:49	Light	3-6-2h	3	244.67	9.10284	37.2	0.6695	81.07%	20.19%	4.9408	1.8913	179.0687	0.5692	8.6796	35.47	9.0996	9.0501	51	25.1	0	0	0	0	0	0	0	0
1:19:02	Light	3-12-3h	1	244.67	9.1192	37.27	0.6682	80.52%	20.05%	4.9064	1.95	59.3339	0.5684	8.6318	35.28	9.1146	9.0406	51	25.05	0	0	0	0	0	0	0	0
1:19:20	Light	3-12-3h	2	244.67	9.09454	37.17	0.6682	80.73%	20.05%	4.9057	1.9525	362.2803	0.5681	8.6356	35.29	9.1048	9.0347	51	25.1	0	0	0	0	0	0	0	0
1:19:44	Light	3-12-3h	3	244.67	9.11989	37.27	0.6681	80.49%	20.05%	4.9045	1.95	101.9181	0.5685	8.6268	35.26	9.1	9.0287	51	25.07	0	0	0	0	0	0	0	0
1:20:48	Light	3-8-2.5h	1	244.67	9.10644	37.22	0.6687	81.52%	20.29%	4.9642	1.9304	57.3285	0.5716	8.685	35.5	9.1078	9.051	51	25.06	0	0	0	0	0	0	0	0
1:21:09	Light	3-8-2.5h	2	244.67	9.09673	37.18	0.6688	81.58%	20.28%	4.9631	1.9304	171.8631	0.5714	8.6854	35.5	9.0946	9.059	51	25.08	0	0	0	0	0	0	0	0
1:21:29	Light	3-8-2.5h	3	244.67	9.10975	37.23	0.6687	81.45%	20.28%	4.9614	1.9304	37.9183	0.5715	8.6819	35.48	9.0837	9.0576	51	25.1	0	0	0	0	0	0	0	0
1:40:59	Light	3-14-4h	1	244.67	9.11985	37.27	0.6698	81.32%	20.30%	4.9676	1.857	77.7247	0.5721	8.6832	35.49	9.1102	9.0645	51	25.02	0	0	0	0	0	0	0	0
1:41:08	Light	3-14-4h	2	244.67	9.10467	37.21	0.6698	81.46%	20.30%	4.9677	1.8546	59.49	0.5721	8.6827	35.49	9.1065	9.053	51	25.1	0	0	0	0	0	0	0	0
1:41:27	Light	3-14-4h	3	244.67	9.11299	37.25	0.6698	81.37%	20.30%	4.9665	1.8595	147.3913	0.572	8.6825	35.49	9.1074	9.0564	51	25.1	0	0	0	0	0	0	0	0
1:42:41	Light	3-18-5h	1	244.67	9.10586	37.22	0.6704	81.16%	20.25%	4.9547	1.8986	55.9405	0.5719	8.6635	35.41	9.0894	9.0439	51	25.04	0	0	0	0	0	0	0	0
1:43:00	Light	3-18-5h	2	244.67	9.08931	37.15	0.6704	81.30%	20.25%	4.9537	1.8986	72.8838	0.5719	8.6622	35.4	9.086	9.0329	51	25.09	0	0	0	0	0	0	0	0
1:43:19	Light	3-18-5h	3	244.67	9.09119	37.16	0.6704	81.30%	20.25%	4.9548	1.8962	1088.763	0.572	8.6625	35.4	9.098	9.0339	51	25.1	0	0	0	0	0	0	0	0
1:48:54	Light	3-6-2.5h	1	244.67	9.11874	37.27	0.6694	80.99%	20.21%	4.9438	1.884	367.1876	0.5695	8.6805	35.48	9.1186	9.0592	51	25	0	0	0	0	0	0	0	0
1:49:03	Light	3-6-2.5h	2	244.67	9.11032	37.24	0.6694	81.01%	20.19%	4.9405	1.8815	160.398	0.5693	8.6775	35.47	9.1014	9.0578	51	25.09	0	0	0	0	0	0	0	0
1:49:20	Light	3-6-2.5h	3	244.67	9.1231	37.29	0.6694	80.89%	20.19%	4.9402	1.8864	322.8949	0.5693	8.6772	35.46	9.1209	9.037	51	25.1	0	0	0	0	0	0	0	0
1:51:43	Light	3-8-3h	1	244.67	9.11114	37.24	0.6689	81.43%	20.28%	4.963	1.9427	406.415	0.5714	8.6851	35.5	9.1126	9.0503	51	25.01	0	0	0	0	0	0	0	0
1:51:55	Light	3-8-3h	2	244.67	9.10187	37.2	0.6689	81.53%	20.29%	4.964	1.9353	165.2239	0.5715	8.6852	35.5	9.1051	9.0567	51	25.1	0	0	0	0	0	0	0	0
1:52:12	Light	3-8-3h	3	244.67	9.10925	37.23	0.6689	81.46%	20.29%	4.9636	1.9378	133.1372	0.5716	8.684	35.49	9.0994	9.0479	51	25.09	0	0	0	0	0	0	0	0
1:58:35	Light	3-16-5h	1	244.67	9.12007	37.27	0.6701	81.04%	20.24%	4.9525	1.9451	290.5917	0.5691	8.703	35.57	9.1068	9.0587	51	25.03	0	0	0	0	0	0	0	0
1:58:44	Light	3-16-5h	2	244.67	9.11546	37.26	0.6701	81.18%	20.27%	4.9587	1.9207	69.1896	0.57	8.6993	35.56	9.1136	9.0607	51	25.1	0	0	0	0	0	0	0	0
1:59:02	Light	3-16-5h	3	244.67	9.1139	37.25	0.6701	81.15%	20.26%	4.9562	1.9231	77.3541	0.5697	8.6999	35.56	9.1024	9.0677	51	25.1	0	0	0	0	0	0	0	0
2:19:42	Light	3-6-3h	1	244.67	9.12173	37.28	0.6693	80.84%	20.17%	4.9357	1.9035	36.1336	0.5684	8.684	35.49	9.1016	9.0513	51	25.04	0	0	0	0	0	0	0	0
2:19:49	Light	3-6-3h	2	244.67	9.11383	37.25	0.6693	80.92%	20.18%	4.9362	1.8913	251.6222	0.5688	8.6785	35.47	9.1249	9.0567	51	25.1	0	0	0	0	0	0	0	0
2:20:08	Light	3-6-3h	3	244.67	9.10623	37.22	0.6693	81.00%	20.18%	4.9369	1.8889	121.3264	0.5691	8.6758	35.46	9.1112	9.057	51	25.1	0	0	0	0	0	0	0	0
2:21:00	Light	3-12-4h	1	244.67	9.09996	37.19	0.6681	80.59%	20.03%	4.8999	1.9671	211.8422	0.5679	8.6281	35.26	9.1024	9.0178	51	25.06	0	0	0	0	0	0	0	0
2:21:16	Light	3-12-4h	2	244.67	9.11246	37.24	0.6681	80.51%	20.03%	4.9014	1.95	80.8075	0.5682	8.6257	35.25	9.1085	9.0309	51	25.1	0	0	0	0	0	0	0	0
2:21:33	Light	3-12-4h	3	244.67	9.10272	37.2	0.668	80.58%	20.03%	4.8996	1.9476	142.616	0.5683	8.6222	35.24	9.1019	9.0221	51	25.1	0	0	0	0	0	0	0	0
2:43:12	Light	3-14-5h	1	244.67	9.11005	37.23	0.6698	81.40%	20.30%	4.9673	1.8766	45.1968	0.5712	8.6966	35.54	9.128	9.0663	51	25.01	0	0	0	0	0	0	0	0
2:43:22	Light	3-14-5h	2	244.67	9.12048	37.28	0.6698	81.36%	20.31%	4.97	1.8668	56.843	0.5715	8.696	35.54	9.1214	9.0755	51	25.08	0	0	0	0	0	0	0	0
2:43:37	Light	3-14-5h	3	244.67	9.12453	37.29	0.6698	81.30%	20.31%	4.9685	1.8644	37.6782	0.5715	8.6938	35.53	9.1186	9.0676	51	25.09	0	0	0	0	0	0	0	0
2:44:34	Light	3-18-6h	1	244.67	9.10822	37.23	0.6704	81.07%	20.23%	4.9504	1.9256	32.0996	0.5707	8.6743	35.45	9.1073	9.0519	51	25.04	0	0	0	0	0	0	0	0
2:44:45	Light	3-18-6h	2	244.67	9.11205	37.24	0.6703	81.08%	20.24%	4.9523	1.9133	41.8434	0.571	8.6724	35.45	9.1061	9.0484	51	25.1	0	0	0	0	0	0	0	0
2:45:06	Light	3-18-6h	3	244.67	9.10451	37.21	0.6703	81.15%	20.24%	4.9525	1.9133	126.2864	0.5711	8.6716	35.44	9.0968	9.0522	51	25.07	0	0	0	0	0	0	0	0
2:52:52	Light	3-8-4h	1	244.67	9.11634	37.26	0.6689	81.38%	20.28%	4.9624	1.835	152.4708	0.5707	8.6953	35.54	9.1135	9.0462	51	25.02	0	0	0	0	0	0	0	0
2:53:04	Light	3-8-4h	2	244.67	9.11163	37.24	0.6689	81.49%	20.30%	4.9664	1.9427	152.477	0.5712	8.6941	35.53	9.1161	9.0673	51	25.09	0	0	0	0	0	0	0	0
2:53:19	Light	3-8-4h	3	244.67	9.09934	37.19	0.6689	81.60%	20.30%	4.9668	1.9353	80.8205	0.5718	8.6865	35.5	9.1013	9.0685	51	25.1	0	0	0	0	0	0	0	0
3:00:35	Light	3-16-6h	1	244.67	9.10655	37.22	0.67	81.08%	20.22%	4.9469	1.9476	74.3715	0.5686	8.6996	35.56	9.1146	9.0667	51	25.03	0	0	0	0	0	0	0	0
3:00:45	Light	3-16-6h	2	244.67	9.12209	37.28	0.6699	81.05%	20.24%	4.9531	1.9158	56.6441	0.5696	8.6958	35.54	9.1203	9.0608	51	25.1	0	0	0	0	0	0	0	0
3:01:02	Light	3-16-6h	3	244.67	9.10468	37.21	0.6699	81.21%	20.25%	4.9534	1.9207	160.5428	0.5695	8.6984	35.55	9.11	9.0654	51	25.1	0	0	0	0	0	0	0	0
3:22:34	Light	3-6-4h	1	244.67	9.10407	37.21	0.6691	80.95%	20.15%	4.9311	1.8815	416.4713	0.5687	8.6704	35.44	9.1136	9.0521	51	25.03	0	0	0	0	0	0	0	0
3:22:45	Light	3-6-4h	2	244.67	9.1092	37.23	0.6691	80.83%	20.14%	4.9265	1.8913	41.2142	0.5684	8.6666	35.42	9.103	9.0511	51	25.09988	0	0	0	0	0	0	0	0
3:23:08	Light	3-6-4h	3	244.67	9.10338	37.21	0.6691	80.92%	20.15%	4.9289	1.884	156.1113	0.5686	8.6679	35.43	9.1008	9.0254	51	25.09	0	0	0	0	0	0	0	0
3:24:13	Light	3-12-5h	1	244.67	9.10345	37.21	0.6679	80.65%	20.04%	4.9034	1.95	848.0139	0.568	8.6324	35.28	9.1032	9.0342	51	25.06	0	0	0	0	0	0	0	0
3:24:32	Light	3-12-5h	2	244.67	9.11437	37.25	0.668	80.51%	20.04%	4.902	1.95	64.7779	0.5683	8.6264	35.26	9.1069	9.0333	51	25.1	0	0	0	0	0	0	0	0
3:24:51	Light	3-12-5h	3	244.67	9.1096	37.23	0.6679	80.61%	20.05%	4.9046	1.9451	27.0216	0.5682	8.6317	35.28	9.0997	9.0405	51	25.1	0	0	0	0	0	0	0	0
3:44:17	Light	3-14-6h	1	244.67	9.10577	37.22	0.6697	81.41%	20.29%	4.9646	1.8619	143.65	0.5714	8.6883	35.51	9.113	9.0549	51	25.04	0	0	0	0	0	0	0	0
3:44:33	Light	3-14-6h	2	244.67	9.10682	37.22	0.6697	81.42%	20.29%	4.9654	1.8595	37.3941	0.5716	8.687	35.5	9.1121	9.0588	51	25.1	0	0	0	0	0	0	0	0
3:44:51	Light	3-14-6h	3	244.67	9.10968	37.23	0.6696	81.39%	20.29%	4.9646	1.8595	74.2584	0.5714	8.6889	35.51	9.1093	9.0484	51	25.1	0	0	0	0	0	0	0	0
3:46:49	Light	3-18-7h	1	244.67	9.10641	37.22	0.6701	81.21%	20.25%	4.9556	1.8889	54.4604	0.5717	8.6678	35.43	9.0939	9.0494	51	25.05	0	0	0	0	0	0	0	0
3:47:09	Light	3-18-7h	2	244.67	9.11153	37.24	0.6702	81.08%	20.24%	4.951	1.9035	27.492	0.5711	8.6686	35.43	9.0973	9.0427	51	25.1	0	0	0	0	0	0	0	0
3:47:28	Light	3-18-7h	3	244.67	9.10519	37.21	0.6702	81.08%	20.22%	4.9477	1.9035	25.5603	0.571	8.6644	35.41	9.1018	9.0476	51	25.1	0	0	0	0	0	0	0	0
3:54:28	Light	3-8-5h	1	244.67	9.10101	37.2	0.6688	81.49%	20.27%	4.9603	1.9402	76.7764	0.5712	8.6843	35.49	9.0972	9.0536	51	25.02	0	0	0	0	0	0	0	0
3:54:39	Light	3-8-5h	2	244.67	9.10103	37.2	0.6688	81.42%	20.25%	4.9558	1.9378	43.066	0.5711	8.6783	35.47	9.0977	9.0652	51	25.1	0	0	0	0	0	0	0	0
3:54:56	Light	3-8-5h	3	244.67	9.09471	37.17	0.6687	81.49%	20.26%	4.9562	1.9378	67.9608	0.5711	8.6777	35.47	9.0919	9.0639	51	25.1	0	0	0	0	0	0	0	0
4:02:13	Light	3-16-7h	1	244.67	9.10363	37.21	0.6698	81.09%	20.21%	4.9447	1.9231	85.5842	0.5691	8.6886	35.51	9.0976	9.0656	51	25.03	0	0	0	0	0	0	0	0
4:02:25	Light	3-16-7h	2	244.67	9.10502	37.21	0.6698	81.17%	20.23%	4.9505	1.8937	418.7048	0.5702	8.6821	35.48	9.1053	9.0514	51	25.1	0	0	0	0	0	0	0	0
4:02:42	Light	3-16-7h	3	244.67	9.10198	37.2	0.6698	81.22%	20.24%	4.9516	1.8913	333.1584	0.5702	8.6836	35.49	9.1098	9.0542	51	25.09	0	0	0	0	0	0	0	0
4:23:59	Light	3-6-5h	1	244.67	9.10201	37.2	0.669	80.87%	20.13%	4.9243	1.9011	39.6921	0.568	8.67	35.44	9.0961	9.0457	51	25.05	0	0	0	0	0	0	0	0
4:24:15	Light	3-6-5h	2	244.67	9.09866	37.19	0.669	80.98%	20.15%	4.9292	1.8742	161.9835	0.5689	8.6652	35.42	9.101	9.0323	51	25.1	0	0	0	0	0	0	0	0
4:24:32	Light	3-6-5h	3	244.67	9.09727	37.18	0.669	81.02%	20.15%	4.931	1.999	129.3898	0.569	8.666	35.42	9.1079	9.0439	51	25.09	0	0	0	0	0	0	0	0
4:26:33	Light	3-12-6h	1	244.67	9.091	37.16	0.6678	80.60%	20.00%	4.8934	1.9623	183.711	0.567	8.6297	35.27	9.0896	9.0215	51	25.07	0	0	0	0	0	0	0	0
4:26:54	Light	3-12-6h	2	244.67	9.09125	37.16	0.6678	80.56%	19.99%	4.8908	1.9598	65.1661	0.5677	8.6155	35.21	9.0911	9.0057	51	25.09	0	0	0	0	0	0	0	0
4:27:13	Light	3-12-6h	3	244.67	9.09423	37.17	0.6678	80.55%	19.99%	4.892	1.9574	124.6144	0.5677	8.6173	35.22	9.0875	9.0112	51	25.1	0	0	0	0	0	0	0	0
4:46:45	Light	3-14-7h	1	244.67	9.09832	37.19	0.6696	81.32%	20.25%	4.9541	1.8644	10654.0531	0.5713	8.6723	35.44	9.0812	9.0536	51	25.04	0	0	0	0	0	0	0	0
4:46:59	Light	3-14-7h	2	244.67	9.09313	37.16	0.6695	81.38%	20.25%	4.9541	1.8595	82.4262	0.5711	8.6749	35.46	9.1006	9.0335	51	25.1	0	0	0	0	0	0	0	0
4:47:18	Light	3-14-7h	3	244.67	9.10537	37.21	0.6696	81.24%	20.24%	4.9533	1.8595	134.1077	0.5713	8.6701	35.44	9.0913	9.0377	51	25.09	0	0	0	0	0	0	0	0
4:48:42	Light	3-18-8h	1	244.67	9.10461	37.21	0.6701	81.11%	20.22%	4.9484	1.8962	97.8775	0.5714	8.6603	35.4	9.0963	9.0395	51	25.07	0	0	0	0	0	0	0	0
4:49:02	Light	3-18-8h	2	244.67	9.10085	37.2	0.6702	81.09%	20.21%	4.9459	1.8986	225.785	0.571	8.6616	35.4	9.1001	9.0455	51	25.1	0	0	0	0	0	0	0	0
4:49:21	Light	3-18-8h	3	244.67	9.09778	37.18	0.67	81.13%	20.21%	4.9454	1.8937	207.5862	0.5713	8.6566	35.38	9.0787	9.0368	51	25.1	0	0	0	0	0	0	0	0
4:56:25	Light	3-8-6h	1	244.67	9.08776	37.14	0.6687	81.41%	20.22%	4.9473	1.9549	539.2069	0.5707	8.6687	35.43	9.0695	9.0381	51	25.02	0	0	0	0	0	0	0	0
4:56:34	Light	3-8-6h	2	244.67	9.07766	37.1	0.6686	81.46%	20.21%	4.9439	1.9427	3647.022	0.5709	8.6598	35.39	9.085	9.0365	51	25.1	0	0	0	0	0	0	0	0
4:56:51	Light	3-8-6h	3	244.67	9.07873	37.11	0.6687	81.45%	20.21%	4.9448	1.95	42.1708	0.5707	8.6646	35.41	9.0866	9.0428	51	25.1	0	0	0	0	0	0	0	0
5:03:05	Light	3-16-8h	1	244.67	9.08523	37.13	0.6697	81.09%	20.16%	4.9337	1.9329	189.855	0.5687	8.6752	35.46	9.0811	9.0454	51	25.02	0	0	0	0	0	0	0	0
5:03:17	Light	3-16-8h	2	244.67	9.09741	37.18	0.6696	80.95%	20.15%	4.9311	1.9182	55.2829	0.5688	8.6688	35.43	9.0826	9.0521	51	25.09	0	0	0	0	0	0	0	0
5:03:32	Light	3-16-8h	3	244.67	9.08971	37.15	0.6697	81.00%	20.15%	4.9306	1.9158	126.7713	0.5689	8.6668	35.42	9.0804	9.0423	51	25.1	0	0	0	0	0	0	0	0
5:26:16	Light	3-6-6h	1	244.67	9.10778	37.22	0.6688	80.91%	20.14%	4.9285	2.0112	110.435	0.5682	8.6732	35.45	9.1121	9.0505	51	25.04	0	0	0	0	0	0	0	0
5:26:31	Light	3-6-6h	2	244.67	9.11288	37.25	0.6689	80.93%	20.16%	4.9331	1.9916	243.0335	0.5691	8.6688	35.43	9.0981	9.032	51	25.1	0	0	0	0	0	0	0	0
5:26:40	Light	3-6-6h	3	244.67	9.10125	37.2	0.6688	81.04%	20.16%	4.933	1.9867	44.2147	0.569	8.6689	35.43	9.1092	9.0504	51	25.09771	0	0	0	0	0	0	0	0
5:28:50	Light	3-12-7h	1	244.67	9.09765	37.18	0.6677	80.46%	19.98%	4.8878	1.9696	48.6445	0.5669	8.6212	35.24	9.0952	9.002	51	25.09	0	0	0	0	0	0	0	0
5:29:12	Light	3-12-7h	2	244.67	9.09315	37.16	0.6678	80.50%	19.98%	4.8885	1.9623	142.4736	0.5674	8.6161	35.22	9.0947	9.0117	51	25.1	0	0	0	0	0	0	0	0
5:29:31	Light	3-12-7h	3	244.67	9.07858	37.11	0.6677	80.65%	19.98%	4.8886	1.9525	52.9388	0.5673	8.6167	35.22	9.082	9.015	51	25.1	0	0	0	0	0	0	0	0
5:49:01	Light	3-14-8h	1	244.67	9.0898	37.15	0.6695	81.37%	20.24%	4.9517	1.8668	79.1853	0.571	8.672	35.44	9.1054	9.0449	51	25.03	0	0	0	0	0	0	0	0
5:49:14	Light	3-14-8h	2	244.67	9.08625	37.14	0.6695	81.38%	20.23%	4.9502	1.8619	407.2166	0.5711	8.6677	35.43	9.0965	9.0328	51	25.1	0	0	0	0	0	0	0	0
5:49:32	Light	3-14-8h	3	244.67	9.11743	37.26	0.6695	81.12%	20.24%	4.9517	1.8619	27.4662	0.5709	8.6737	35.45	9.0908	9.0336	51	25.1	0	0	0	0	0	0	0	0
5:51:04	Light	3-18-9h	1	244.67	9.08702	37.14	0.6701	80.92%	20.14%	4.9275	1.9329	307.2813	0.5699	8.6467	35.34	9.0897	9.0172	51	25.07	0	0	0	0	0	0	0	0
5:51:24	Light	3-18-9h	2	244.67	9.08429	37.13	0.67	81.05%	20.16%	4.9332	1.9158	171.3824	0.5705	8.6469	35.34	9.079	9.0242	51	25.1	0	0	0	0	0	0	0	0
5:51:43	Light	3-18-9h	3	244.67	9.07419	37.09	0.67	81.14%	20.16%	4.933	1.9158	57.293	0.5704	8.6486	35.35	9.0789	9.0075	51	25.1	0	0	0	0	0	0	0	0
5:58:11	Light	3-8-7h	1	244.67	9.09027	37.15	0.6687	81.33%	20.21%	4.9438	1.9623	52.9875	0.5704	8.6676	35.43	9.0899	9.041	51	25.01	0	0	0	0	0	0	0	0
5:58:24	Light	3-8-7h	2	244.67	9.08906	37.15	0.6686	81.37%	20.21%	4.9449	1.95	143.3763	0.5707	8.6643	35.41	9.0743	9.0403	51	25.08	0	0	0	0	0	0	0	0
5:58:39	Light	3-8-7h	3	244.67	9.07831	37.1	0.6687	81.44%	20.21%	4.9441	1.95	49.5096	0.5706	8.6646	35.41	9.0767	9.037	51	25.1	0	0	0	0	0	0	0	0
6:05:11	Light	3-16-9h	1	244.67	9.09745	37.18	0.6697	81.03%	20.18%	4.9371	1.9182	100.3279	0.569	8.6771	35.46	9.0914	9.0453	51	25.01	0	0	0	0	0	0	0	0
6:05:24	Light	3-16-9h	2	244.67	9.08447	37.13	0.6696	81.23%	20.20%	4.9412	1.8913	84.8403	0.5697	8.6735	35.45	9.0826	9.0424	51	25.1	0	0	0	0	0	0	0	0
6:05:39	Light	3-16-9h	3	244.67	9.08537	37.13	0.6695	81.18%	20.18%	4.9379	1.8937	102.3992	0.5696	8.6695	35.43	9.0937	9.0313	51	25.1	0	0	0	0	0	0	0	0
6:27:52	Light	3-6-7h	1	244.67	9.1073	37.22	0.6687	80.83%	20.12%	4.9226	2.0185	45.6078	0.5676	8.6718	35.44	9.0854	9.0469	51	25.05	0	0	0	0	0	0	0	0
6:28:05	Light	3-6-7h	2	244.67	9.09823	37.19	0.6688	80.95%	20.13%	4.926	1.9965	107.364	0.5685	8.6655	35.42	9.0884	9.0272	51	25.1	0	0	0	0	0	0	0	0
6:28:22	Light	3-6-7h	3	244.67	9.10866	37.23	0.6687	80.91%	20.14%	4.9284	1.9867	81.3578	0.5687	8.6658	35.42	9.0913	9.0507	51	25.09	0	0	0	0	0	0	0	0
6:29:58	Light	3-12-8h	1	244.67	9.07365	37.09	0.6677	80.59%	19.95%	4.8823	1.9794	128.6709	0.5667	8.6155	35.21	9.0935	9.0114	51	25.07	0	0	0	0	0	0	0	0
6:30:17	Light	3-12-8h	2	244.67	9.08983	37.15	0.6677	80.49%	19.97%	4.8853	1.9549	61.9472	0.5675	8.6091	35.19	9.0753	9.0072	51	25.1	0	0	0	0	0	0	0	0
6:30:37	Light	3-12-8h	3	244.67	9.08393	37.13	0.6677	80.55%	19.97%	4.8856	1.9549	81.3085	0.5675	8.6097	35.19	9.081	9.0017	51	25.1	0	0	0	0	0	0	0	0
6:50:07	Light	3-14-9h	1	244.67	9.10156	37.2	0.6695	81.29%	20.24%	4.9533	1.8693	203.1114	0.5708	8.678	35.47	9.104	9.0575	51	25.05	0	0	0	0	0	0	0	0
6:50:22	Light	3-14-9h	2	244.67	9.09473	37.17	0.6694	81.38%	20.25%	4.9545	1.8619	50.8444	0.5709	8.6788	35.47	9.1052	9.065	51	25.1	0	0	0	0	0	0	0	0
6:50:39	Light	3-14-9h	3	244.67	9.09525	37.17	0.6694	81.34%	20.24%	4.9523	1.8546	40.4231	0.571	8.6728	35.45	9.0999	9.0385	51	25.1	0	0	0	0	0	0	0	0
6:52:06	Light	3-18-10h	1	244.67	9.09316	37.16	0.6699	81.02%	20.17%	4.9352	1.9231	489.5582	0.57	8.6577	35.39	9.0825	9.035	51	25.07	0	0	0	0	0	0	0	0
6:52:25	Light	3-18-10h	2	244.67	9.10168	37.2	0.6699	80.93%	20.17%	4.9344	1.9207	49.3757	0.5701	8.6552	35.37	9.0871	9.029	51	25.1	0	0	0	0	0	0	0	0
6:52:43	Light	3-18-10h	3	244.67	9.08855	37.15	0.6699	80.98%	20.15%	4.9306	1.9158	32.1202	0.5706	8.6418	35.32	9.082	9.0234	51	25.1	0	0	0	0	0	0	0	0
6:58:57	Light	3-8-8h	1	244.67	9.08404	37.13	0.6686	81.42%	20.21%	4.945	1.9769	58.5421	0.5696	8.682	35.48	9.0891	9.0512	51	25.04	0	0	0	0	0	0	0	0
6:59:10	Light	3-8-8h	2	244.67	9.09774	37.18	0.6686	81.37%	20.23%	4.9498	1.9525	146.2544	0.5704	8.6773	35.47	9.0933	9.0589	51	25.09	0	0	0	0	0	0	0	0
6:59:25	Light	3-8-8h	3	244.67	9.09634	37.18	0.6685	81.39%	20.23%	4.949	1.95	68110.0902	0.5704	8.6759	35.46	9.0883	9.0515	51	25.1	0	0	0	0	0	0	0	0
7:05:56	Light	3-16-10h	1	244.67	9.08246	37.12	0.6695	81.15%	20.17%	4.9347	1.9109	203.2945	0.5687	8.6766	35.46	9.1047	9.0538	51	25.04	0	0	0	0	0	0	0	0
7:06:09	Light	3-16-10h	2	244.67	9.08557	37.13	0.6695	81.19%	20.18%	4.9383	1.8937	103.8492	0.5694	8.6723	35.44	9.1016	9.0509	51	25.1	0	0	0	0	0	0	0	0
7:06:26	Light	3-16-10h	3	244.67	9.09316	37.16	0.6694	81.13%	20.18%	4.9383	1.8937	96.4638	0.5692	8.675	35.46	9.0935	9.0491	51	25.09	0	0	0	0	0	0	0	0
7:29:00	Light	3-6-8h	1	244.67	9.11448	37.25	0.6686	80.67%	20.09%	4.9159	2.0332	252.8867	0.5669	8.6711	35.44	9.1124	9.047	51	25.05	0	0	0	0	0	0	0	0
7:29:15	Light	3-6-8h	2	244.67	9.10169	37.2	0.6686	80.91%	20.12%	4.9239	1.999	49.6641	0.568	8.6693	35.43	9.0954	9.0446	51	25.09	0	0	0	0	0	0	0	0
7:29:31	Light	3-6-8h	3	244.67	9.09778	37.18	0.6685	80.96%	20.13%	4.9241	1.999	114.9056	0.5679	8.6702	35.44	9.0922	9.0427	51	25.1	0	0	0	0	0	0	0	0
7:31:22	Light	3-12-9h	1	244.67	9.0798	37.11	0.6676	80.67%	19.99%	4.8898	1.9671	52.837	0.567	8.6236	35.25	9.091	9.0215	51	25.06	0	0	0	0	0	0	0	0
7:31:40	Light	3-12-9h	2	244.67	9.0971	37.18	0.6675	80.57%	20.00%	4.8925	1.9476	164.1888	0.5675	8.6212	35.24	9.0981	9.0098	51	25.1	0	0	0	0	0	0	0	0
7:31:59	Light	3-12-9h	3	244.67	9.08804	37.14	0.6675	80.65%	20.00%	4.8922	1.9427	146.2123	0.5675	8.6202	35.23	9.0866	9.0198	51	25.09	0	0	0	0	0	0	0	0
7:51:10	Light	3-14-10h	1	244.67	9.09394	37.17	0.6693	81.33%	20.23%	4.95	1.8717	79.5061	0.5705	8.6769	35.46	9.1039	9.047	51	25.04	0	0	0	0	0	0	0	0
7:51:26	Light	3-14-10h	2	244.67	9.09947	37.19	0.6693	81.28%	20.23%	4.9502	1.8619	62.6885	0.5706	8.6754	35.46	9.1001	9.0389	51	25.1	0	0	0	0	0	0	0	0
7:51:46	Light	3-14-10h	3	244.67	9.08703	37.14	0.6694	81.37%	20.23%	4.9496	1.8595	141.2941	0.5708	8.6719	35.44	9.0877	9.0464	51	25.09	0	0	0	0	0	0	0	0
7:53:18	Light	3-18-11h	1	244.67	9.07371	37.09	0.6699	81.06%	20.14%	4.9275	1.9378	94.6158	0.5694	8.654	35.37	9.0905	9.0254	51	25.08	0	0	0	0	0	0	0	0
7:53:38	Light	3-18-11h	2	244.67	9.0742	37.09	0.6699	81.11%	20.15%	4.9306	1.9207	56.6646	0.57	8.6504	35.36	9.0714	9.0294	51	25.1	0	0	0	0	0	0	0	0
7:53:59	Light	3-18-11h	3	244.67	9.083	37.12	0.6698	81.06%	20.15%	4.9313	1.9158	541.304	0.57	8.6508	35.36	9.0886	9.0061	51	25.09	0	0	0	0	0	0	0	0
8:00:19	Light	3-8-9h	1	244.67	9.08424	37.13	0.6686	81.25%	20.17%	4.9352	1.9843	57.6113	0.5692	8.6697	35.43	9.0886	9.0245	51	25.02	0	0	0	0	0	0	0	0
8:00:28	Light	3-8-9h	2	244.67	9.08597	37.14	0.6685	81.28%	20.18%	4.9369	1.9574	24847.0891	0.5701	8.6605	35.4	9.0775	9.0331	51	25.1	0	0	0	0	0	0	0	0
8:00:46	Light	3-8-9h	3	244.67	9.07566	37.09	0.6685	81.31%	20.16%	4.9334	1.9671	54.4612	0.5697	8.6601	35.4	9.0823	9.0382	51	25.1	0	0	0	0	0	0	0	0
8:07:41	Light	3-16-11h	1	244.67	9.10995	37.23	0.6694	80.82%	20.14%	4.9284	1.9011	48.6686	0.5689	8.6631	35.41	9.0803	9.0313	51	25.03	0	0	0	0	0	0	0	0
8:07:54	Light	3-16-11h	2	244.67	9.083	37.12	0.6694	81.02%	20.13%	4.9264	1.9035	103.2355	0.5688	8.6612	35.4	9.0881	9.0259	51	25.1	0	0	0	0	0	0	0	0
8:08:12	Light	3-16-11h	3	244.67	9.08214	37.12	0.6693	81.03%	20.13%	4.9253	1.9035	145.4743	0.5686	8.6617	35.4	9.0921	9.0434	51	25.1	0	0	0	0	0	0	0	0
8:30:02	Light	3-6-9h	1	244.67	9.08941	37.15	0.6684	80.86%	20.08%	4.9125	2.0185	144.0818	0.5671	8.6622	35.4	9.0982	9.0336	51	25.05	0	0	0	0	0	0	0	0
8:30:18	Light	3-6-9h	2	244.67	9.08197	37.12	0.6684	80.91%	20.07%	4.9117	2.0087	77.8076	0.5674	8.6573	35.38	9.0966	9.0361	51	25.1	0	0	0	0	0	0	0	0
8:30:35	Light	3-6-9h	3	244.67	9.1038	37.21	0.6683	80.73%	20.08%	4.9118	2.0038	64.3718	0.5675	8.6556	35.38	9.0915	9.0313	51	25.1	0	0	0	0	0	0	0	0
8:32:58	Light	3-12-10h	1	244.67	9.08401	37.13	0.6675	80.40%	19.93%	4.8753	1.9794	889.2541	0.5665	8.6054	35.17	9.0858	8.9969	51	25.08	0	0	0	0	0	0	0	0
8:33:17	Light	3-12-10h	2	244.67	9.06645	37.06	0.6674	80.53%	19.92%	4.8727	1.972	66.973	0.5666	8.6006	35.15	9.0805	8.9943	51	25.1	0	0	0	0	0	0	0	0
8:33:38	Light	3-12-10h	3	244.67	9.07704	37.1	0.6673	80.42%	19.91%	4.8711	1.972	37.8644	0.5664	8.6002	35.15	9.0827	8.9972	51	25.1	0	0	0	0	0	0	0	0
8:52:34	Light	3-14-11h	1	244.67	9.07924	37.11	0.6693	81.19%	20.17%	4.9339	1.8986	406.4325	0.569	8.6707	35.44	9.0856	9.0269	51	25.06	0	0	0	0	0	0	0	0
8:52:51	Light	3-14-11h	2	244.67	9.08202	37.12	0.6693	81.18%	20.17%	4.9347	1.8913	44.7017	0.5695	8.6649	35.41	9.0939	9.0194	51	25.1	0	0	0	0	0	0	0	0
8:53:09	Light	3-14-11h	3	244.67	9.0837	37.13	0.6692	81.19%	20.17%	4.9355	1.884	89.9281	0.5693	8.6695	35.43	9.067	9.0253	51	25.1	0	0	0	0	0	0	0	0
8:55:00	Light	3-18-12h	1	244.67	9.06307	37.04	0.6698	81.11%	20.12%	4.9236	1.906	215.5607	0.5704	8.6315	35.28	9.0635	9.0114	51	25.09	0	0	0	0	0	0	0	0
8:55:21	Light	3-18-12h	2	244.67	9.05946	37.03	0.6698	81.19%	20.14%	4.9267	1.8986	78.3799	0.5705	8.6359	35.3	9.056	9.0114	51	25.09	0	0	0	0	0	0	0	0
8:55:41	Light	3-18-12h	3	244.67	9.07829	37.1	0.6697	80.97%	20.12%	4.9228	1.9035	59.8308	0.5704	8.63	35.27	9.0672	9.0054	51	25.1	0	0	0	0	0	0	0	0
9:01:18	Light	3-8-10h	1	244.67	9.07055	37.07	0.6685	81.24%	20.13%	4.9263	1.9818	74.1826	0.5693	8.6531	35.37	9.0778	9.0133	51	25.04	0	0	0	0	0	0	0	0
9:01:41	Light	3-8-10h	2	244.67	9.05687	37.02	0.6685	81.39%	20.14%	4.9276	1.972	228.0266	0.5695	8.6522	35.36	9.0677	9.0295	51	25.03	0	0	0	0	0	0	0	0
9:01:51	Light	3-8-10h	3	244.67	9.06724	37.06	0.6684	81.30%	20.14%	4.927	1.9598	44.7661	0.5697	8.6484	35.35	9.0671	9.0168	51	25.1	0	0	0	0	0	0	0	0
9:09:11	Light	3-16-12h	1	244.67	9.08536	37.13	0.6693	80.86%	20.10%	4.9171	1.928	52.5015	0.5679	8.6586	35.39	9.0872	9.0255	51	25.03	0	0	0	0	0	0	0	0
9:09:22	Light	3-16-12h	2	244.67	9.07772	37.1	0.6692	81.03%	20.12%	4.9225	1.8962	174.9452	0.5688	8.6537	35.37	9.0692	9.0202	51	25.1	0	0	0	0	0	0	0	0
9:09:44	Light	3-16-12h	3	244.67	9.07235	37.08	0.6693	81.04%	20.11%	4.921	1.8986	708.014	0.5685	8.6564	35.38	9.0847	9.0128	51	25.05	0	0	0	0	0	0	0	0
9:31:03	Light	3-6-10h	1	244.67	9.09936	37.19	0.6683	80.59%	20.03%	4.901	2.0528	91.5427	0.5659	8.6612	35.4	9.0972	9.021	51	25.05	0	0	0	0	0	0	0	0
9:31:15	Light	3-6-10h	2	244.67	9.08627	37.14	0.6683	80.93%	20.08%	4.9141	2.0014	526.2098	0.5675	8.6594	35.39	9.0958	9.0414	51	990	0	0	0	0	0	0	0	0
9:31:35	Light	3-6-10h	3	244.67	9.08323	37.12	0.6682	80.96%	20.08%	4.9136	1.9941	102.3928	0.5675	8.6577	35.39	9.0878	9.0353	51	25.1	0	0	0	0	0	0	0	0
9:33:26	Light	3-12-11h	1	244.67	9.07306	37.08	0.6673	80.53%	19.93%	4.8758	1.9696	185.0436	0.5663	8.6103	35.19	9.0831	9.0013	51	25.07	0	0	0	0	0	0	0	0
9:33:46	Light	3-12-11h	2	244.67	9.07441	37.09	0.6673	80.55%	19.93%	4.8773	1.9574	204.2135	0.5667	8.607	35.18	9.0742	8.9868	51	25.1	0	0	0	0	0	0	0	0
9:34:06	Light	3-12-11h	3	244.67	9.07578	37.09	0.6672	80.54%	19.93%	4.8772	1.9549	44.288	0.5666	8.6072	35.18	9.0727	9.0003	51	25.1	0	0	0	0	0	0	0	0
9:54:54	Light	3-14-12h	1	244.67	9.07989	37.11	0.6692	81.10%	20.14%	4.9278	1.9109	160.226	0.5688	8.6637	35.41	9.0792	9.0312	51	25.06	0	0	0	0	0	0	0	0
9:55:06	Light	3-14-12h	2	244.67	9.08006	37.11	0.6692	81.19%	20.16%	4.9332	1.8864	38.7103	0.5694	8.6643	35.41	9.078	9.0193	51	25.12155	0	0	0	0	0	0	0	0
9:55:39	Light	3-14-12h	3	244.67	9.08518	37.13	0.6692	81.13%	20.16%	4.9323	1.8864	32.0151	0.5695	8.6606	35.4	9.0712	9.0316	51	25.03	0	0	0	0	0	0	0	0
10:03:23	Light	3-8-11h	1	244.67	9.06376	37.04	0.6684	81.22%	20.11%	4.9203	2.0087	72.1434	0.5682	8.6588	35.39	9.0669	9.0083	51	25.04	0	0	0	0	0	0	0	0
10:03:37	Light	3-8-11h	2	244.67	9.06864	37.06	0.6684	81.27%	20.13%	4.9263	1.9794	129.278	0.5691	8.6555	35.38	9.0696	9.0292	51	25.1	0	0	0	0	0	0	0	0
10:03:54	Light	3-8-11h	3	244.67	9.05534	37.01	0.6683	81.39%	20.13%	4.9255	1.9769	124.9469	0.5691	8.6553	35.38	9.0723	9.0153	51	25.09	0	0	0	0	0	0	0	0
10:32:55	Light	3-6-11h	1	244.67	9.08421	37.13	0.6682	80.85%	20.06%	4.9077	1.9941	48.0271	0.5672	8.6524	35.36	9.0933	9.0222	51	25.06	0	0	0	0	0	0	0	0
10:33:14	Light	3-6-11h	2	244.67	9.08805	37.14	0.6681	80.82%	20.06%	4.9071	1.9916	206.3691	0.5674	8.6487	35.35	9.0815	9.0189	51	25.1	0	0	0	0	0	0	0	0
10:33:31	Light	3-6-11h	3	244.67	9.07972	37.11	0.668	80.89%	20.05%	4.9064	1.9916	55.2348	0.5672	8.6502	35.35	9.0909	9.0198	51	25.1	0	0	0	0	0	0	0	0
10:35:14	Light	3-12-12h	1	244.67	9.07457	37.09	0.6672	80.54%	19.93%	4.8761	1.9451	52.4335	0.5669	8.6008	35.15	9.0692	9.0027	51	25.09	0	0	0	0	0	0	0	0
10:35:36	Light	3-12-12h	2	244.67	9.0792	37.11	0.6672	80.48%	19.93%	4.8752	1.9476	102.0851	0.5668	8.6008	35.15	9.0777	9.0008	51	25.09	0	0	0	0	0	0	0	0
10:35:55	Light	3-12-12h	3	244.67	9.07571	37.09	0.6671	80.46%	19.91%	4.8714	1.9525	48.2723	0.5664	8.6001	35.15	9.0704	8.9943	51	25.09	0	0	0	0	0	0	0	0
11:04:52	Light	3-8-12h	1	244.67	9.07838	37.1	0.6683	81.31%	20.16%	4.9333	1.9647	144.6812	0.5693	8.6649	35.41	9.0846	9.0338	51	25.05	0	0	0	0	0	0	0	0
11:05:07	Light	3-8-12h	2	244.67	9.07841	37.1	0.6682	81.29%	20.15%	4.931	1.9598	313.9423	0.5693	8.661	35.4	9.0782	9.039	51	25.1	0	0	0	0	0	0	0	0
11:05:24	Light	3-8-12h	3	244.67	9.07786	37.1	0.6682	81.34%	20.17%	4.9338	1.95	46.0007	0.5697	8.661	35.4	9.0871	9.0266	51	25.1	0	0	0	0	0	0	0	0
11:34:31	Light	3-8-12h	4	244.67	9.09118	37.16	0.668	80.76%	20.05%	4.9045	2.0038	66.8501	0.5667	8.6551	35.37	9.0905	9.0386	51	25.06	0	0	0	0	0	0	0	0
11:34:50	Light	3-8-12h	5	244.67	9.09181	37.16	0.6679	80.84%	20.06%	4.9091	1.9965	1187.9777	0.5665	8.666	35.42	9.0847	9.0223	51	25.08	0	0	0	0	0	0	0	0
11:35:10	Light	3-8-12h	6	244.67	9.08658	37.14	0.6678	80.84%	20.05%	4.9056	1.999	56.8338	0.5667	8.6565	35.38	9.0876	9.0325	51	25.09	0	0	0	0	0	0	0	0
11:38:31	Light	3-8-12h	7	244.67	9.08651	37.14	0.6672	81.48%	20.19%	4.9398	1.8937	542.0404	0.5687	8.6868	35.5	9.0905	9.0624	51	25.06	0	0	0	0	0	0	0	0
11:38:57	Light	3-8-12h	8	244.67	9.09634	37.18	0.6673	81.27%	20.16%	4.9333	1.9084	218.1966	0.5685	8.6773	35.47	9.1	9.0537	51	25.05	0	0	0	0	0	0	0	0
11:39:18	Light	000	1	244.67	9.08751	37.14	0.6673	81.31%	20.15%	4.9306	1.9084	65.0276	0.5684	8.674	35.45	9.0811	9.0534	51	25.08	0	0	0	0	0	0	0	0
