# Supplementary material for: Study on the Electrical Injection Regeneration of Industrialized B-Doped Czochralski Silicon PERC Solar Cells
Source: Hindawi journal article supplement (doi:10.1155/2019/5357370), 2019-06-20
Supplement: f1 [file 5357370.f1.zip › section3.3/IVRawData_000.csv]

11:39 04/04/2018
Test Lot:	JK-PERC
Recipe:	Recipe_YJX-LID
Cell Name:	000
Test Order:	2
Test Condition:	Light
1	-0.29988444	9.08541490	-2.72457456		1.00000000	34.34000000	311.99314767	0.000000
2	-0.29006436	9.09801290	-2.63900929		2.00000000	17.17000000	156.21288149	0.061795
3	-0.27993095	9.09714510	-2.54657247		3.00000000	11.44666667	104.13198758	0.083222
4	-0.27012652	9.08518310	-2.45414889		4.00000000	8.58500000	77.99629691	0.104716
5	-0.25997749	9.08756260	-2.36256171		5.00000000	6.86800000	62.41337994	0.126091
6	-0.24979644	9.08219050	-2.26869885		6.00000000	5.72333333	51.98040363	0.147538
7	-0.23996967	9.09948540	-2.18360051		7.00000000	4.90571429	44.63947552	0.168909
8	-0.22982955	9.08912470	-2.08894944		8.00000000	4.29250000	39.01506777	0.190394
9	-0.21997599	9.09375950	-2.00040875		9.00000000	3.81555556	34.69774458	0.211786
10	-0.20991552	9.08801360	-1.90771510		10.00000000	3.43400000	31.20823870	0.233162
11	-0.20007014	9.08260440	-1.81715793		11.00000000	3.12181818	28.35423955	0.254501
12	-0.18993971	9.08732220	-1.72604334		12.00000000	2.86166667	26.00488703	0.275974
13	-0.18013230	9.09517770	-1.63833528		13.00000000	2.64153846	24.02526171	0.297339
14	-0.17000112	9.07346730	-1.54249960		14.00000000	2.45285714	22.25591908	0.318708
15	-0.16015723	9.08853440	-1.45559449		15.00000000	2.28933333	20.80668475	0.340191
16	-0.15000150	9.07634640	-1.36146557		16.00000000	2.14625000	19.48010846	0.361577
17	-0.13985021	9.09966850	-1.27259055		17.00000000	2.02000000	18.38133037	0.382937
18	-0.13004801	9.08158970	-1.18104267		18.00000000	1.90777778	17.32565502	0.404307
19	-0.11988780	9.09258270	-1.09008974		19.00000000	1.80736842	16.43364684	0.425781
20	-0.11008708	9.07855890	-0.99943204		20.00000000	1.71700000	15.58788563	0.447163
21	-0.09991497	9.08418660	-0.90764621		21.00000000	1.63523810	14.85480799	0.468517
22	-0.09010830	9.10525610	-0.82045913		22.00000000	1.56090909	14.21247702	0.489886
23	-0.07995851	9.08948520	-0.72678172		23.00000000	1.49304348	13.57099660	0.511365
24	-0.07012504	9.06228260	-0.63549296		24.00000000	1.43083333	12.96661602	0.532757
25	-0.05998568	9.10625930	-0.54624515		25.00000000	1.37360000	12.50835777	0.554100
26	-0.04979942	9.08199210	-0.45227794		26.00000000	1.32076923	11.99521572	0.575485
27	-0.03999721	9.07539650	-0.36299057		27.00000000	1.27185185	11.54255984	0.596953
28	-0.02985636	9.09786130	-0.27162902		28.00000000	1.22642857	11.15787704	0.618331
29	-0.02004373	9.08538150	-0.18210496		29.00000000	1.18413793	10.75834485	0.639702
30	-0.00986641	9.08411310	-0.08962757		30.00000000	1.14466667	10.39828146	0.661074
31	-0.00063135	9.08774470	-0.00573751		31.00000000	1.10774194	10.06687590	0.682669
32	0.00952642	9.08394810	0.08653750		32.00000000	1.07312500	9.74821180	0.704041
33	0.01933356	9.08374600	0.17562111		33.00000000	1.04060606	9.45260114	0.725397
34	0.02947189	9.09896280	0.26816362		34.00000000	1.01000000	9.18995243	0.746778
35	0.03927382	9.08311560	0.35672862		35.00000000	0.98114286	8.91183399	0.768253
36	0.04943671	9.08934880	0.44934751		36.00000000	0.95388889	8.67022883	0.789628
37	0.05924385	9.08156010	0.53802656		37.00000000	0.92810811	8.42866956	0.810998
38	0.06940823	9.09619050	0.63135048		38.00000000	0.90368421	8.22008373	0.832360
39	0.07955252	9.07792660	0.72217190		39.00000000	0.88051282	7.99323075	0.853833
40	0.08939315	9.09211540	0.81277280		40.00000000	0.85850000	7.80558107	0.875213
41	0.09954711	9.09705160	0.90558520		41.00000000	0.83756098	7.61933541	0.896602
42	0.10936243	9.08681680	0.99375637		42.00000000	0.81761905	7.42955450	0.917946
43	0.11948439	9.09115890	1.08625158		43.00000000	0.79860465	7.26024178	0.939431
44	0.12930419	9.09035970	1.17542160		44.00000000	0.78045455	7.09461255	0.960805
45	0.13944401	9.07690240	1.26571967		45.00000000	0.76311111	6.92668508	0.982193
46	0.14927422	9.09668640	1.35790077		46.00000000	0.74652174	6.79087415	1.003670
47	0.15943860	9.08937550	1.44919730		47.00000000	0.73063830	6.64104584	1.025044
48	0.16956651	9.09060670	1.54146245		48.00000000	0.71541667	6.50357154	1.046402
49	0.17938183	9.08273320	1.62927730		49.00000000	0.70081633	6.36532772	1.067779
50	0.18952760	9.09210010	1.72320391		50.00000000	0.68680000	6.24445435	1.089265
51	0.19930497	9.08111100	1.80991056		51.00000000	0.67333333	6.11461474	1.110660
52	0.20944777	9.09709170	1.90536557		52.00000000	0.66038462	6.00757940	1.132013
53	0.21927872	9.07657340	1.99029940		53.00000000	0.64792453	5.88093454	1.153383
54	0.22943120	9.08885480	2.08526686		54.00000000	0.63592593	5.77983840	1.174872
55	0.23924801	9.08251290	2.17297314		55.00000000	0.62436364	5.67079078	1.196249
56	0.24942431	9.09064670	2.26742828		56.00000000	0.61321429	5.57451442	1.217590
57	0.25956115	9.08206560	2.35735139		57.00000000	0.60245614	5.47154619	1.238985
58	0.26934966	9.09878440	2.45075448		58.00000000	0.59206897	5.38710787	1.260466
59	0.27952895	9.08468530	2.53943254		59.00000000	0.58203390	5.28759480	1.281856
60	0.28934205	9.08748250	2.62939082		60.00000000	0.57233333	5.20106915	1.303192
61	0.29950643	9.08804700	2.72192851		61.00000000	0.56295082	5.11612351	1.324561
62	0.30932844	9.08115580	2.80905976		62.00000000	0.55387097	5.02978855	1.346041
63	0.31946975	9.07677840	2.89975613		63.00000000	0.54507937	4.94756461	1.367421
64	0.32931706	9.09091380	2.99379301		64.00000000	0.53656250	4.87784344	1.388768
65	0.33940852	9.07869630	3.08138687		65.00000000	0.52830769	4.79634509	1.410152
66	0.34925660	9.08941840	3.17453937		66.00000000	0.52030303	4.72925194	1.431639
67	0.35940236	9.08133600	3.26385359		67.00000000	0.51253731	4.65452356	1.453006
68	0.36955187	9.09242250	3.36012174		68.00000000	0.50500000	4.59167336	1.474378
69	0.37938431	9.08139990	3.44534063		69.00000000	0.49768116	4.51964163	1.495753
70	0.38952115	9.08246420	3.53781190		70.00000000	0.49057143	4.45559744	1.517237
71	0.39935955	9.08007810	3.62621590		71.00000000	0.48366197	4.39168848	1.538629
72	0.40948448	9.08940030	3.72196836		72.00000000	0.47694444	4.33513898	1.560011
73	0.41933256	9.07549000	3.80564845		73.00000000	0.47041096	4.26920995	1.581363
74	0.42948651	9.08352090	3.90124969		74.00000000	0.46405405	4.21524470	1.602840
75	0.43928027	9.07776640	3.98768368		75.00000000	0.45786667	4.15640664	1.624212
76	0.44943348	9.08034130	4.08100939		76.00000000	0.45184211	4.10288053	1.645608
77	0.45956734	9.06837560	4.16752925		77.00000000	0.44597403	4.04425998	1.667077
78	0.46942583	9.07877920	4.26181346		78.00000000	0.44025641	3.99699074	1.688446
79	0.47956938	9.06822870	4.34884482		79.00000000	0.43468354	3.94180979	1.709795
80	0.48937428	9.05795570	4.43273055		80.00000000	0.42925000	3.88812748	1.731180
81	0.49953568	9.05337430	4.52248349		81.00000000	0.42395062	3.83818362	1.752652
82	0.50934285	9.03198150	4.60037520		82.00000000	0.41878049	3.78241762	1.774037
83	0.51949155	9.00051310	4.67569050		83.00000000	0.41373494	3.72382675	1.795388
84	0.52927417	8.98583410	4.75596989		84.00000000	0.40880952	3.67349456	1.816755
85	0.53939760	8.91962810	4.81122599		85.00000000	0.40400000	3.60352975	1.838241
86	0.54954487	8.86140350	4.86973883		86.00000000	0.39930233	3.53837903	1.859627
87	0.55938697	8.76723770	4.90427853		87.00000000	0.39471264	3.46053957	1.880984
88	0.56950152	8.63626860	4.91836809		88.00000000	0.39022727	3.37010754	1.902362
89	0.57928556	8.44229790	4.89050127		89.00000000	0.38584270	3.25739899	1.923836
90	0.58942538	8.17598530	4.81913324		90.00000000	0.38155556	3.11959261	1.945218
91	0.59923249	7.82238250	4.68742574		91.00000000	0.37736264	2.95187489	1.966574
92	0.60936713	7.33217860	4.46798863		92.00000000	0.37326087	2.73681536	1.988041
93	0.61916906	6.69056130	4.14258855		93.00000000	0.36924731	2.47047177	2.009540
94	0.62926275	5.84608510	3.67872359		94.00000000	0.36531915	2.13568683	2.030910
95	0.63938099	4.75176620	3.03818898		95.00000000	0.36147368	1.71763843	2.052244
96	0.64916879	3.41095950	2.21428845		96.00000000	0.35770833	1.22012864	2.073630
97	0.65930337	1.68405140	1.11030076		97.00000000	0.35402062	0.59618892	2.095109
98	0.66898024	-0.34891886	-0.23341982		98.00000000	0.35040816	-0.12226402	2.116493
99	0.67909777	-2.84422780	-1.93150876		99.00000000	0.34686869	-0.98657356	2.137923
100	0.68885726	-5.73671440	-3.95177736		100.00000000	0.34340000	-1.96998772	2.159309
101	0.69913405	-9.26395800	-6.47674848		101.00000000	0.34000000	-3.14974572	2.180871
