# Supplementary material for: Study on the Electrical Injection Regeneration of Industrialized B-Doped Czochralski Silicon PERC Solar Cells
Source: Hindawi journal article supplement (doi:10.1155/2019/5357370), 2019-06-20
Supplement: f1 [file 5357370.f1.zip › section3.3/IVRawData_3-6-1.5h.csv]

00:44 04/04/2018
Test Lot:	JK-PERC
Recipe:	Recipe_YJX-LID
Cell Name:	3-6-1.5h
Test Order:	2
Test Condition:	Light
1	-0.29992580	9.09523870	-2.72789674		1.00000000	34.34000000	312.33049696	0.000000
2	-0.29009113	9.10857770	-2.64231760		2.00000000	17.17000000	156.39427911	0.061811
3	-0.27997440	9.10519220	-2.54922072		3.00000000	11.44666667	104.22410005	0.083241
4	-0.27017996	9.10846610	-2.46092501		4.00000000	8.58500000	78.19618147	0.104741
5	-0.25998509	9.10457610	-2.36705404		5.00000000	6.86800000	62.53022865	0.126115
6	-0.24984676	9.10976600	-2.27604552		6.00000000	5.72333333	52.13822741	0.147485
7	-0.24004710	9.10186770	-2.18487695		7.00000000	4.90571429	44.65116240	0.168853
8	-0.22987975	9.09226320	-2.09012719		8.00000000	4.29250000	39.02853979	0.190327
9	-0.22003542	9.10417560	-2.00324110		9.00000000	3.81555556	34.73748779	0.211713
10	-0.20989935	9.10622310	-1.91139031		10.00000000	3.43400000	31.27077013	0.233095
11	-0.20004682	9.10536380	-1.82149907		11.00000000	3.12181818	28.42529026	0.254436
12	-0.18994498	9.10778330	-1.72997772		12.00000000	2.86166667	26.06343988	0.275899
13	-0.18012895	9.09520530	-1.63830978		13.00000000	2.64153846	24.02533462	0.297281
14	-0.16999955	9.10531230	-1.54789899		14.00000000	2.45285714	22.33403031	0.318670
15	-0.16017681	9.09949590	-1.45752823		15.00000000	2.28933333	20.83177928	0.340148
16	-0.15001617	9.11414720	-1.36726946		16.00000000	2.14625000	19.56123843	0.361519
17	-0.13988456	9.09545710	-1.27231401		17.00000000	2.02000000	18.37282334	0.382878
18	-0.13008489	9.10690590	-1.18467085		18.00000000	1.90777778	17.37395270	0.404244
19	-0.11990490	9.10196110	-1.09136974		19.00000000	1.80736842	16.45059706	0.425720
20	-0.11007992	9.10357000	-1.00212026		20.00000000	1.71700000	15.63082969	0.447090
21	-0.09992896	9.09786510	-0.90914020		21.00000000	1.63523810	14.87717560	0.468433
22	-0.09011886	9.10065560	-0.82014074		22.00000000	1.56090909	14.20529606	0.489803
23	-0.07998353	9.10430240	-0.72819426		23.00000000	1.49304348	13.59311932	0.511281
24	-0.07014218	9.10554600	-0.63868285		24.00000000	1.43083333	13.02851874	0.532655
25	-0.05997484	9.09338470	-0.54537431		25.00000000	1.37360000	12.49067322	0.553997
26	-0.04986556	9.11874680	-0.45471137		26.00000000	1.32076923	12.04376020	0.575375
27	-0.04003834	9.10229110	-0.36444066		27.00000000	1.27185185	11.57676579	0.596858
28	-0.02989110	9.09190560	-0.27176708		28.00000000	1.22642857	11.15057280	0.618289
29	-0.02010408	9.10323910	-0.18301225		29.00000000	1.18413793	10.77949071	0.639649
30	-0.00993749	9.11153890	-0.09054580		30.00000000	1.14466667	10.42967486	0.661018
31	-0.00071238	9.09034540	-0.00647581		31.00000000	1.10774194	10.06975681	0.682616
32	0.00946442	9.10695270	0.08619205		32.00000000	1.07312500	9.77289862	0.703990
33	0.01927647	9.09523200	0.17532397		33.00000000	1.04060606	9.46455354	0.725344
34	0.02942491	9.11089800	0.26808736		34.00000000	1.01000000	9.20200698	0.746721
35	0.03926896	9.09195230	0.35703150		35.00000000	0.98114286	8.92050406	0.768188
36	0.04940177	9.11252020	0.45017464		36.00000000	0.95388889	8.69233177	0.789564
37	0.05920935	9.09324070	0.53840491		37.00000000	0.92810811	8.43951042	0.810935
38	0.06934217	9.11597630	0.63212154		38.00000000	0.90368421	8.23796385	0.832304
39	0.07951145	9.10118680	0.72364855		39.00000000	0.88051282	8.01371166	0.853780
40	0.08934135	9.09844110	0.81286701		40.00000000	0.85850000	7.81101168	0.875164
41	0.09949054	9.10232450	0.90559516		41.00000000	0.83756098	7.62375179	0.896547
42	0.10928770	9.10689740	0.99527187		42.00000000	0.81761905	7.44597278	0.917890
43	0.11943019	9.09546380	1.08627297		43.00000000	0.79860465	7.26367970	0.939361
44	0.12929583	9.10402680	1.17711270		44.00000000	0.78045455	7.10527910	0.960751
45	0.13943756	9.10630990	1.26976163		45.00000000	0.76311111	6.94912627	0.982134
46	0.14924291	9.10538580	1.35891427		46.00000000	0.74652174	6.79736844	1.003610
47	0.15939358	9.09913060	1.45034300		47.00000000	0.73063830	6.64817329	1.024975
48	0.16953236	9.09876820	1.54253565		48.00000000	0.71541667	6.50941042	1.046334
49	0.17938012	9.10667510	1.63355647		49.00000000	0.70081633	6.38210659	1.067726
50	0.18951145	9.10895820	1.72625188		50.00000000	0.68680000	6.25603249	1.089211
51	0.19930711	9.07542510	1.80879675		51.00000000	0.67333333	6.11078623	1.110594
52	0.20943993	9.11747170	1.90956263		52.00000000	0.66038462	6.02103804	1.131927
53	0.21923634	9.10167880	1.99541875		53.00000000	0.64792453	5.89720094	1.153294
54	0.22942498	9.09361930	2.08630343		54.00000000	0.63592593	5.78286827	1.174778
55	0.23923777	9.09780220	2.17653791		55.00000000	0.62436364	5.68033686	1.196153
56	0.24938993	9.10035510	2.26953692		56.00000000	0.61321429	5.58046775	1.217506
57	0.25953019	9.10254670	2.36238567		57.00000000	0.60245614	5.48388515	1.238881
58	0.26935339	9.09233950	2.44905247		58.00000000	0.59206897	5.38329204	1.260354
59	0.27948099	9.10124680	2.54362547		59.00000000	0.58203390	5.29723415	1.281744
60	0.28928113	9.10086630	2.63270889		60.00000000	0.57233333	5.20872915	1.303101
61	0.29944223	9.10459420	2.72629999		61.00000000	0.56295082	5.12543877	1.324467
62	0.30926320	9.09555050	2.81291905		62.00000000	0.55387097	5.03776136	1.345926
63	0.31940347	9.10596750	2.90847762		63.00000000	0.54507937	4.96347498	1.367291
64	0.32919466	9.09603600	2.99436648		64.00000000	0.53656250	4.88059182	1.388668
65	0.33938554	9.10340980	3.08956565		65.00000000	0.52830769	4.80940142	1.410037
66	0.34920576	9.10123630	3.17820414		66.00000000	0.52030303	4.73540083	1.431510
67	0.35935345	9.10064600	3.27034854		67.00000000	0.51253731	4.66442065	1.452886
68	0.36949819	9.09905340	3.36208376		68.00000000	0.50500000	4.59502197	1.474268
69	0.37932736	9.09726620	3.45084197		69.00000000	0.49768116	4.52753799	1.495635
70	0.38947877	9.10455420	3.54603057		70.00000000	0.49057143	4.46643416	1.517105
71	0.39928338	9.07881160	3.62501858		71.00000000	0.48366197	4.39107592	1.538491
72	0.40945265	9.11813450	3.73344433		72.00000000	0.47694444	4.34884359	1.559879
73	0.41926098	9.08819580	3.81032588		73.00000000	0.47041096	4.27518690	1.581225
74	0.42942581	9.10093980	3.90817845		74.00000000	0.46405405	4.22332801	1.602704
75	0.43926165	9.08740810	3.99174988		75.00000000	0.45786667	4.16082126	1.624079
76	0.44939670	9.09074120	4.08534910		76.00000000	0.45184211	4.10757964	1.645467
77	0.45953473	9.08819770	4.17634248		77.00000000	0.44597403	4.05310012	1.666937
78	0.46942267	9.08559700	4.26498520		78.00000000	0.44025641	3.99999232	1.688300
79	0.47951010	9.06528000	4.34689332		79.00000000	0.43468354	3.94052804	1.709661
80	0.48935115	9.06566430	4.43629325		80.00000000	0.42925000	3.89143640	1.731034
81	0.49949515	9.05576610	4.52331125		81.00000000	0.42395062	3.83919763	1.752514
82	0.50931466	9.03274150	4.60050767		82.00000000	0.41878049	3.78273589	1.773898
83	0.51946157	9.01478290	4.68283328		83.00000000	0.41373494	3.72973066	1.795241
84	0.52923715	8.99204730	4.75892549		84.00000000	0.40880952	3.67603457	1.816621
85	0.53937519	8.92742440	4.81523123		85.00000000	0.40400000	3.60667946	1.838105
86	0.54952663	8.86720180	4.87276352		86.00000000	0.39930233	3.54069430	1.859483
87	0.55933416	8.78219320	4.91218066		87.00000000	0.39471264	3.46644270	1.880835
88	0.56946403	8.65577410	4.92915200		88.00000000	0.39022727	3.37771912	1.902208
89	0.57928425	8.47451690	4.90915417		89.00000000	0.38584270	3.26983045	1.923681
90	0.58941036	8.22078230	4.84541425		90.00000000	0.38155556	3.13668516	1.945067
91	0.59918594	7.88482000	4.72447328		91.00000000	0.37736264	2.97543647	1.966425
92	0.60931724	7.42604400	4.52481663		92.00000000	0.37326087	2.77185164	1.987898
93	0.61911595	6.81616780	4.21999820		93.00000000	0.36924731	2.51685164	2.009396
94	0.62921673	6.01443580	3.78438363		94.00000000	0.36531915	2.19718857	2.030768
95	0.63935548	4.96389770	3.17369520		95.00000000	0.36147368	1.79431839	2.052165
96	0.64914376	3.69999580	2.40182919		96.00000000	0.35770833	1.32351933	2.073563
97	0.65927058	2.05957370	1.35781635		97.00000000	0.35402062	0.72913156	2.095053
98	0.66896433	0.14521104	0.09714101		98.00000000	0.35040816	0.05088313	2.116430
99	0.67906439	-2.23067160	-1.51476965		99.00000000	0.34686869	-0.77375013	2.137805
100	0.68879080	-4.93041130	-3.39602194		100.00000000	0.34340000	-1.69310324	2.159161
101	0.69900775	-8.22004990	-5.74587859		101.00000000	0.34000000	-2.79481697	2.180635
00:45 04/04/2018
Test Lot:	JK-PERC
Recipe:	Recipe_YJX-LID
Cell Name:	3-6-1.5h
Test Order:	3
Test Condition:	Light
1	-0.29992878	9.10950280	-2.73220206		1.00000000	34.34000000	312.82032615	0.000000
2	-0.29006433	9.10404010	-2.64075729		2.00000000	17.17000000	156.31636852	0.021573
3	-0.27996922	9.11444760	-2.55176479		3.00000000	11.44666667	104.33004353	0.042970
4	-0.27017623	9.09280200	-2.45665896		4.00000000	8.58500000	78.06170517	0.064311
5	-0.26006845	9.10080240	-2.36683157		5.00000000	6.86800000	62.50431088	0.085685
6	-0.24989961	9.08795550	-2.27107654		6.00000000	5.72333333	52.01339865	0.107217
7	-0.24006420	9.11244490	-2.18757179		7.00000000	4.90571429	44.70305112	0.128613
8	-0.22990654	9.09313770	-2.09057183		8.00000000	4.29250000	39.03229358	0.149960
9	-0.22003840	9.10359290	-2.00314002		9.00000000	3.81555556	34.73526447	0.171337
10	-0.20992391	9.09992980	-1.91029284		10.00000000	3.43400000	31.24915893	0.192826
11	-0.20012721	9.09506320	-1.82016962		11.00000000	3.12181818	28.39313366	0.214206
12	-0.18997550	9.10387990	-1.72951414		12.00000000	2.86166667	26.05226965	0.235541
13	-0.18015945	9.10839460	-1.64096336		13.00000000	2.64153846	24.06017466	0.256910
14	-0.17000552	9.10426430	-1.54777519		14.00000000	2.45285714	22.33145972	0.278384
15	-0.16021402	9.09295750	-1.45681927		15.00000000	2.28933333	20.81681070	0.299747
16	-0.15006678	9.10816380	-1.36683281		16.00000000	2.14625000	19.54839656	0.321087
17	-0.13991657	9.09109780	-1.27199522		17.00000000	2.02000000	18.36401756	0.342470
18	-0.13008340	9.09861470	-1.18357874		18.00000000	1.90777778	17.35813493	0.363956
19	-0.11995923	9.11954780	-1.09397393		19.00000000	1.80736842	16.48238271	0.385350
20	-0.11009778	9.09643650	-1.00149746		20.00000000	1.71700000	15.61858147	0.406703
21	-0.09997882	9.10040570	-0.90984781		21.00000000	1.63523810	14.88133008	0.428092
22	-0.09015905	9.10479450	-0.82087963		22.00000000	1.56090909	14.21175651	0.449567
23	-0.07998651	9.11209580	-0.72884470		23.00000000	1.49304348	13.60475521	0.470951
24	-0.07015929	9.09155180	-0.63785686		24.00000000	1.43083333	13.00849537	0.492314
25	-0.06000163	9.11782550	-0.54708443		25.00000000	1.37360000	12.52424511	0.513684
26	-0.04984769	9.10646150	-0.45393609		26.00000000	1.32076923	12.02753415	0.535159
27	-0.04005025	9.10101320	-0.36449788		27.00000000	1.27185185	11.57514049	0.556528
28	-0.02989855	9.10835740	-0.27232663		28.00000000	1.22642857	11.17074975	0.577944
29	-0.02007729	9.10540390	-0.18281182		29.00000000	1.18413793	10.78205414	0.599290
30	-0.00992632	9.10627840	-0.09039187		30.00000000	1.14466667	10.42365334	0.620762
31	-0.00070494	9.10295200	-0.00641704		31.00000000	1.10774194	10.08372167	0.642277
32	0.00948377	9.10884480	0.08638622		32.00000000	1.07312500	9.77492908	0.663659
33	0.01929880	9.09706400	0.17556238		33.00000000	1.04060606	9.46645993	0.685141
34	0.02943235	9.10010530	0.26783751		34.00000000	1.01000000	9.19110635	0.706530
35	0.03927194	9.10067080	0.35740096		35.00000000	0.98114286	8.92905815	0.727876
36	0.04939433	9.10277840	0.44962562		36.00000000	0.95388889	8.68303917	0.749248
37	0.05921159	9.08054730	0.53767361		37.00000000	0.92810811	8.42772958	0.770739
38	0.06937045	9.11545370	0.63234312		38.00000000	0.90368421	8.23749158	0.792116
39	0.07947423	9.10515020	0.72362483		39.00000000	0.88051282	8.01720148	0.813471
40	0.08932200	9.08516310	0.81150495		40.00000000	0.85850000	7.79961252	0.834842
41	0.09945556	9.11009310	0.90604939		41.00000000	0.83756098	7.63025846	0.856315
42	0.10927728	9.10068420	0.99449802		42.00000000	0.81761905	7.44089275	0.877714
43	0.11942870	9.09884360	1.08666306		43.00000000	0.79860465	7.26637882	0.899069
44	0.12926754	9.10661510	1.17718973		44.00000000	0.78045455	7.10729915	0.920445
45	0.13938621	9.10081100	1.26852755		45.00000000	0.76311111	6.94492999	0.941930
46	0.14921388	9.10751630	1.35896784		46.00000000	0.74652174	6.79895891	0.963305
47	0.15937573	9.09970090	1.45027147		47.00000000	0.73063830	6.64858998	0.984658
48	0.16954128	9.10296730	1.54332873		48.00000000	0.71541667	6.51241452	1.006047
49	0.17935929	9.10428910	1.63293883		49.00000000	0.70081633	6.38043444	1.027521
50	0.18949135	9.10091110	1.72454393		50.00000000	0.68680000	6.25050574	1.048899
51	0.19925576	9.11278720	1.81577534		51.00000000	0.67333333	6.13594338	1.070254
52	0.20941165	9.09556870	1.90471805		52.00000000	0.66038462	6.00657364	1.091644
53	0.21925421	9.09931760	1.99506369		53.00000000	0.64792453	5.89567106	1.113127
54	0.22939894	9.10275360	2.08816203		54.00000000	0.63592593	5.78867701	1.134514
55	0.23923628	9.09214780	2.17517162		55.00000000	0.62436364	5.67680646	1.155876
56	0.24936984	9.11182880	2.27221529		56.00000000	0.61321429	5.58750359	1.177244
57	0.25949967	9.09401320	2.35989342		57.00000000	0.60245614	5.47874409	1.198717
58	0.26932436	9.10442450	2.45204330		58.00000000	0.59206897	5.39044720	1.220102
59	0.27951971	9.09776210	2.54300382		59.00000000	0.58203390	5.29520594	1.241487
60	0.28931835	9.10036180	2.63290166		60.00000000	0.57233333	5.20844040	1.262840
61	0.29945639	9.10229970	2.72574181		61.00000000	0.56295082	5.12414708	1.284315
62	0.30927959	9.10116480	2.81480452		62.00000000	0.55387097	5.04087096	1.305700
63	0.31942132	9.09235670	2.90429258		63.00000000	0.54507937	4.95605602	1.327091
64	0.32927132	9.10425570	2.99777029		64.00000000	0.53656250	4.88500220	1.348568
65	0.33940041	9.10578440	3.09050696		65.00000000	0.52830769	4.81065594	1.369958
66	0.34920576	9.09338470	3.17546232		66.00000000	0.52030303	4.73131562	1.391317
67	0.35936388	9.11348440	3.27505711		67.00000000	0.51253731	4.67100081	1.412683
68	0.36952573	9.09765530	3.36181772		68.00000000	0.50500000	4.59431593	1.434166
69	0.37932810	9.10256480	3.45285861		69.00000000	0.49768116	4.53017500	1.455540
70	0.38948622	9.10302260	3.54550186		70.00000000	0.49057143	4.46568280	1.476900
71	0.39929602	9.09495160	3.63157798		71.00000000	0.48366197	4.39888222	1.498298
72	0.40944669	9.10879520	3.72956604		72.00000000	0.47694444	4.34438927	1.519776
73	0.41925651	9.08590790	3.80932604		73.00000000	0.47041096	4.27411065	1.541166
74	0.42940941	9.10192390	3.90845177		74.00000000	0.46405405	4.22378469	1.562508
75	0.43922818	9.08631520	3.99096569		75.00000000	0.45786667	4.16032085	1.583881
76	0.44936246	9.08995340	4.08468382		76.00000000	0.45184211	4.10722368	1.605363
77	0.45953399	9.08544060	4.17506877		77.00000000	0.44597403	4.05187052	1.626747
78	0.46936613	9.07500840	4.25950157		78.00000000	0.44025641	3.99533062	1.648096
79	0.47951382	9.07902050	4.35351580		79.00000000	0.43468354	3.94650081	1.669478
80	0.48934671	9.06439210	4.43563045		80.00000000	0.42925000	3.89089031	1.690958
81	0.49946314	9.05636980	4.52332290		81.00000000	0.42395062	3.83945357	1.712326
82	0.50929010	9.03763480	4.60277793		82.00000000	0.41878049	3.78478511	1.733681
83	0.51944000	9.01819420	4.68441080		83.00000000	0.41373494	3.73114203	1.755058
84	0.52920961	8.97879120	4.75166259		84.00000000	0.40880952	3.67061535	1.776526
85	0.53936255	8.93630600	4.81990879		85.00000000	0.40400000	3.61026762	1.797899
86	0.54951769	8.87546830	4.87722684		86.00000000	0.39930233	3.54399513	1.819264
87	0.55934459	8.78571130	4.91424008		87.00000000	0.39471264	3.46783133	1.840634
88	0.56945211	8.66093440	4.93198737		88.00000000	0.39022727	3.37973281	1.862114
89	0.57926863	8.47786620	4.91096194		89.00000000	0.38584270	3.27112276	1.883486
90	0.58940965	8.23327060	4.85276914		90.00000000	0.38155556	3.14145014	1.904882
91	0.59920305	7.89748380	4.73219638		91.00000000	0.37736264	2.98021532	1.926225
92	0.60931951	7.44869710	4.53863647		92.00000000	0.37326087	2.78030716	1.947690
93	0.61913377	6.84998560	4.24105741		93.00000000	0.36924731	2.52933877	1.969071
94	0.62922567	6.03083850	3.79475840		94.00000000	0.36531915	2.20318079	1.990547
95	0.63934952	5.01612520	3.20705724		95.00000000	0.36147368	1.81319726	2.012055
96	0.64913106	3.71999910	2.41476696		96.00000000	0.35770833	1.33067468	2.033462
97	0.65926540	2.08568550	1.37502029		97.00000000	0.35402062	0.73837567	2.054813
98	0.66898066	0.13838828	0.09257908		98.00000000	0.35040816	0.04849238	2.076196
99	0.67903978	-2.24422550	-1.52391839		99.00000000	0.34686869	-0.77845155	2.097720
100	0.68876255	-4.99699260	-3.44174137		100.00000000	0.34340000	-1.71596726	2.119103
101	0.69900924	-8.34768200	-5.83510685		101.00000000	0.34000000	-2.83821188	2.140473
00:45 04/04/2018
Test Lot:	JK-PERC
Recipe:	Recipe_YJX-LID
Cell Name:	3-6-1.5h
Test Order:	4
Test Condition:	Light
1	-0.29988912	9.10881140	-2.73163343		1.00000000	34.34000000	312.79658348	0.000000
2	-0.29011026	9.09435750	-2.63836642		2.00000000	17.17000000	156.15011828	0.061791
3	-0.27997491	9.10532190	-2.54926168		3.00000000	11.44666667	104.22558468	0.083219
4	-0.27014324	9.09791180	-2.45773937		4.00000000	8.58500000	78.10557280	0.104571
5	-0.25995874	9.11219790	-2.36879548		5.00000000	6.86800000	62.58257518	0.126046
6	-0.24979660	9.09080220	-2.27085148		6.00000000	5.72333333	52.02969126	0.147578
7	-0.24002966	9.10399150	-2.18522798		7.00000000	4.90571429	44.66158116	0.168993
8	-0.22981319	9.09392360	-2.08990359		8.00000000	4.29250000	39.03566705	0.190422
9	-0.22002243	9.09693430	-2.00152959		9.00000000	3.81555556	34.70985821	0.211893
10	-0.20986326	9.10573580	-1.91095940		10.00000000	3.43400000	31.26909674	0.233279
11	-0.20003974	9.09045030	-1.81845131		11.00000000	3.12181818	28.37873303	0.254634
12	-0.18991779	9.11473750	-1.73105080		12.00000000	2.86166667	26.08334048	0.275984
13	-0.18010247	9.10762980	-1.64030662		13.00000000	2.64153846	24.05815441	0.297492
14	-0.16995670	9.09416870	-1.54561490		14.00000000	2.45285714	22.30669665	0.318867
15	-0.16012649	9.11106970	-1.45892361		15.00000000	2.28933333	20.85827557	0.340253
16	-0.14998370	9.10287380	-1.36528269		16.00000000	2.14625000	19.53704289	0.361620
17	-0.13984239	9.10171220	-1.27280519		17.00000000	2.02000000	18.38545864	0.383085
18	-0.13002335	9.11039070	-1.18456352		18.00000000	1.90777778	17.38060092	0.404474
19	-0.11986865	9.08721640	-1.08927236		19.00000000	1.80736842	16.42394796	0.425867
20	-0.11008459	9.09290700	-1.00098894		20.00000000	1.71700000	15.61252132	0.447216
21	-0.09990681	9.11313250	-0.91046400		21.00000000	1.63523810	14.90214143	0.468684
22	-0.09008256	9.09866330	-0.81963091		22.00000000	1.56090909	14.20218626	0.490069
23	-0.07993009	9.09555050	-0.72700816		23.00000000	1.49304348	13.58005236	0.511455
24	-0.07013486	9.09199050	-0.63766551		24.00000000	1.43083333	13.00912307	0.532929
25	-0.05997867	9.10185050	-0.54591690		25.00000000	1.37360000	12.50230185	0.554382
26	-0.04983811	9.10485940	-0.45376899		26.00000000	1.32076923	12.02541815	0.575753
27	-0.04006447	9.09587100	-0.36442124		27.00000000	1.27185185	11.56860038	0.597140
28	-0.02988148	9.10416030	-0.27204581		28.00000000	1.22642857	11.16560231	0.618479
29	-0.02007509	9.09299370	-0.18254270		29.00000000	1.18413793	10.76735875	0.639966
30	-0.00988615	9.12209610	-0.09018246		30.00000000	1.14466667	10.44175934	0.661356
31	-0.00062754	9.09691720	-0.00570870		31.00000000	1.10774194	10.07703667	0.682831
32	0.00946890	9.10086630	0.08617521		32.00000000	1.07312500	9.76636715	0.704199
33	0.01931074	9.10086250	0.17574434		33.00000000	1.04060606	9.47041267	0.725664
34	0.02944282	9.09541030	0.26779454		34.00000000	1.01000000	9.18636440	0.747046
35	0.03926531	9.11307720	0.35782776		35.00000000	0.98114286	8.94123060	0.768421
36	0.04942344	9.10727310	0.45011277		36.00000000	0.95388889	8.68732662	0.789777
37	0.05924667	9.10410020	0.53938759		37.00000000	0.92810811	8.44958921	0.811247
38	0.06939736	9.10151390	0.63162104		38.00000000	0.90368421	8.22489440	0.832624
39	0.07952721	9.11500840	0.72489122		39.00000000	0.88051282	8.02588176	0.854006
40	0.08935714	9.10184100	0.81331446		40.00000000	0.85850000	7.81393050	0.875493
41	0.09954653	9.09494110	0.90536982		41.00000000	0.83756098	7.61756774	0.896880
42	0.10932957	9.10243800	0.99516563		42.00000000	0.81761905	7.44232669	0.918238
43	0.11950184	9.09787850	1.08721322		43.00000000	0.79860465	7.26560809	0.939617
44	0.12932433	9.10032560	1.17689351		44.00000000	0.78045455	7.10239048	0.961102
45	0.13944897	9.09632020	1.26847248		45.00000000	0.76311111	6.94150301	0.982473
46	0.14926997	9.09954070	1.35828817		46.00000000	0.74652174	6.79300495	1.003822
47	0.15943258	9.09543510	1.45010868		47.00000000	0.73063830	6.64547322	1.025208
48	0.16958997	9.10553360	1.54420717		48.00000000	0.71541667	6.51425050	1.046676
49	0.17940202	9.09891990	1.63236461		49.00000000	0.70081633	6.37667162	1.068058
50	0.18955196	9.09955120	1.72483777		50.00000000	0.68680000	6.24957176	1.089466
51	0.19932161	9.09805390	1.81343875		51.00000000	0.67333333	6.12602296	1.110848
52	0.20949091	9.10666850	1.90776427		52.00000000	0.66038462	6.01390377	1.132324
53	0.21929032	9.08586790	1.99244288		53.00000000	0.64792453	5.88695667	1.153710
54	0.22943953	9.10513690	2.08907833		54.00000000	0.63592593	5.79019261	1.175051
55	0.23927243	9.09594630	2.17640917		55.00000000	0.62436364	5.67917811	1.196434
56	0.24943057	9.09479140	2.26851900		56.00000000	0.61321429	5.57705601	1.217903
57	0.25955075	9.09952070	2.36178742		57.00000000	0.60245614	5.48206212	1.239278
58	0.26937547	9.10328390	2.45220138		58.00000000	0.59206897	5.38977188	1.260629
59	0.27950233	9.09598920	2.54235018		59.00000000	0.58203390	5.29417405	1.281998
60	0.28934342	9.10014820	2.63306800		60.00000000	0.57233333	5.20831815	1.303466
61	0.29947850	9.10706620	2.72737052		61.00000000	0.56295082	5.12683038	1.324851
62	0.30929577	9.10110950	2.81493467		62.00000000	0.55387097	5.04084033	1.346211
63	0.31942636	9.09921360	2.90652868		63.00000000	0.54507937	4.95979357	1.367568
64	0.32927638	9.10631180	2.99849338		64.00000000	0.53656250	4.88610543	1.389042
65	0.33940995	9.08638190	3.08400843		65.00000000	0.52830769	4.80040545	1.410415
66	0.34923765	9.10340790	3.17925278		66.00000000	0.52030303	4.73653072	1.431787
67	0.35936454	9.09609130	3.26881267		67.00000000	0.51253731	4.66208620	1.453144
68	0.36952639	9.09479430	3.36076651		68.00000000	0.50500000	4.59287112	1.474624
69	0.37935928	9.10628320	3.45455304		69.00000000	0.49768116	4.53202558	1.496018
70	0.38950551	9.09287550	3.54172511		70.00000000	0.49057143	4.46070492	1.517399
71	0.39934659	9.09242820	3.63103020		71.00000000	0.48366197	4.39766175	1.538876
72	0.40948984	9.10079570	3.72668338		72.00000000	0.47694444	4.34057395	1.560256
73	0.41933021	9.08316900	3.80884716		73.00000000	0.47041096	4.27282224	1.581612
74	0.42947197	9.09926890	3.90788094		74.00000000	0.46405405	4.22255262	1.602986
75	0.43927285	9.07800390	3.98772065		75.00000000	0.45786667	4.15651539	1.624469
76	0.44945854	9.07359980	4.07820692		76.00000000	0.45184211	4.09983444	1.645844
77	0.45958391	9.08127500	4.17360787		77.00000000	0.44597403	4.05001277	1.667189
78	0.46944064	9.09201430	4.26816101		78.00000000	0.44025641	4.00281758	1.688574
79	0.47958538	9.06360440	4.34677216		79.00000000	0.43468354	3.93979968	1.710056
80	0.48939744	9.06907370	4.43838145		80.00000000	0.42925000	3.89289989	1.731433
81	0.49952951	9.04966260	4.52057352		81.00000000	0.42395062	3.83661005	1.752796
82	0.50933713	9.04742150	4.60818770		82.00000000	0.41878049	3.78888359	1.774173
83	0.51946253	9.01414490	4.68251052		83.00000000	0.41373494	3.72946670	1.795649
84	0.52926785	8.98452760	4.75522161		84.00000000	0.40880952	3.67296045	1.817032
85	0.53940815	8.93870070	4.82160801		85.00000000	0.40400000	3.61123508	1.838373
86	0.54954022	8.86551190	4.87195536		86.00000000	0.39930233	3.54001952	1.859752
87	0.55936944	8.77741910	4.90982001		87.00000000	0.39471264	3.46455830	1.881227
88	0.56949407	8.62669280	4.91285039		88.00000000	0.39022727	3.36637080	1.902604
89	0.57929718	8.45825580	4.89984373		89.00000000	0.38584270	3.26355623	1.923954
90	0.58942407	8.23098370	4.85153991		90.00000000	0.38155556	3.14057756	1.945335
91	0.59925175	7.87882090	4.72139721		91.00000000	0.37736264	2.97317263	1.966811
92	0.60933918	7.40294460	4.51090419		92.00000000	0.37326087	2.76322954	1.988326
93	0.61914754	6.79948760	4.20988602		93.00000000	0.36924731	2.51069252	2.009715
94	0.62926847	6.00479030	3.77862520		94.00000000	0.36531915	2.19366488	2.031076
95	0.63937896	4.95764640	3.16981480		95.00000000	0.36147368	1.79205871	2.052560
96	0.64919329	3.69005730	2.39556044		96.00000000	0.35770833	1.31996425	2.073941
97	0.65932012	2.05187770	1.35284425		97.00000000	0.35402062	0.72640701	2.095329
98	0.66899526	0.13541551	0.09059233		98.00000000	0.35040816	0.04745070	2.116663
99	0.67910802	-2.25151250	-1.52902020		99.00000000	0.34686869	-0.78097918	2.138149
100	0.68880171	-4.94048880	-3.40301713		100.00000000	0.34340000	-1.69656385	2.159587
101	0.69905514	-8.24082470	-5.76079086		101.00000000	0.34000000	-2.80188040	2.180978
