# Supplementary material for: Study on the Electrical Injection Regeneration of Industrialized B-Doped Czochralski Silicon PERC Solar Cells
Source: Hindawi journal article supplement (doi:10.1155/2019/5357370), 2019-06-20
Supplement: f1 [file 5357370.f1.zip › section3.3/IVRawData_3-6-1h.csv]

00:11 04/04/2018
Test Lot:	JK-PERC
Recipe:	Recipe_YJX-LID
Cell Name:	3-6-1h
Test Order:	2
Test Condition:	Light
1	-0.29993245	9.10867210	-2.73198634		1.00000000	34.34000000	312.79179991	0.000000
2	-0.29009843	9.09939100	-2.63971904		2.00000000	17.17000000	156.23654347	0.061791
3	-0.27996969	9.10947610	-2.55037720		3.00000000	11.44666667	104.27313642	0.083272
4	-0.27016026	9.11972140	-2.46378630		4.00000000	8.58500000	78.29280822	0.104771
5	-0.25997645	9.10839650	-2.36796859		5.00000000	6.86800000	62.55646716	0.126161
6	-0.24984549	9.10437300	-2.27468653		6.00000000	5.72333333	52.10736147	0.147504
7	-0.24001223	9.11922260	-2.18872495		7.00000000	4.90571429	44.73630058	0.168879
8	-0.22991624	9.10324000	-2.09298271		8.00000000	4.29250000	39.07565770	0.190377
9	-0.22006884	9.11664580	-2.00628967		9.00000000	3.81555556	34.78506853	0.211752
10	-0.20992820	9.10121540	-1.91060177		10.00000000	3.43400000	31.25357368	0.233096
11	-0.20011057	9.10508540	-1.82202383		11.00000000	3.12181818	28.42442115	0.254472
12	-0.18996844	9.11561780	-1.73167969		12.00000000	2.86166667	26.08585960	0.275955
13	-0.18017909	9.10283090	-1.64013979		13.00000000	2.64153846	24.04547793	0.297326
14	-0.17002356	9.10144040	-1.54745930		14.00000000	2.45285714	22.32453310	0.318685
15	-0.16018806	9.10346510	-1.45826641		15.00000000	2.28933333	20.84086610	0.340071
16	-0.15006678	9.11116030	-1.36728249		16.00000000	2.14625000	19.55482779	0.361544
17	-0.13990007	9.11104490	-1.27463582		17.00000000	2.02000000	18.40431070	0.382926
18	-0.13008691	9.10273740	-1.18414698		18.00000000	1.90777778	17.36600013	0.404278
19	-0.11993883	9.11178300	-1.09285659		19.00000000	1.80736842	16.46834885	0.425646
20	-0.11011004	9.09207150	-1.00112836		20.00000000	1.71700000	15.61108677	0.447124
21	-0.09993218	9.11781410	-0.91116303		21.00000000	1.63523810	14.90979696	0.468492
22	-0.09012646	9.10126400	-0.82026466		22.00000000	1.56090909	14.20624572	0.489871
23	-0.07998060	9.11091140	-0.72869620		23.00000000	1.49304348	13.60298685	0.511239
24	-0.07013469	9.10947320	-0.63889010		24.00000000	1.43083333	13.03413790	0.532709
25	-0.05998661	9.10524560	-0.54619278		25.00000000	1.37360000	12.50696536	0.554097
26	-0.04985638	9.11250020	-0.45431630		26.00000000	1.32076923	12.03550988	0.575482
27	-0.04000377	9.10674950	-0.36430434		27.00000000	1.27185185	11.58243622	0.596833
28	-0.02987206	9.10614010	-0.27201918		28.00000000	1.22642857	11.16803039	0.618313
29	-0.02006485	9.12440300	-0.18307979		29.00000000	1.18413793	10.80455169	0.639678
30	-0.00992495	9.10283090	-0.09034516		30.00000000	1.14466667	10.41970710	0.661060
31	-0.00067594	9.11659720	-0.00616229		31.00000000	1.10774194	10.09883703	0.682661
32	0.00950692	9.09783080	0.08649231		32.00000000	1.07312500	9.76310968	0.704046
33	0.01929152	9.10763070	0.17570004		33.00000000	1.04060606	9.47745570	0.725395
34	0.02945271	9.11030770	0.26832326		34.00000000	1.01000000	9.20141078	0.746776
35	0.03928941	9.10324000	0.35766094		35.00000000	0.98114286	8.93157890	0.768252
36	0.04940372	9.11746690	0.45043675		36.00000000	0.95388889	8.69705037	0.789647
37	0.05926647	9.11146550	0.54000437		37.00000000	0.92810811	8.45642501	0.811000
38	0.06938822	9.09985350	0.63142262		38.00000000	0.90368421	8.22339393	0.832392
39	0.07953378	9.10861680	0.72444271		39.00000000	0.88051282	8.02025387	0.853878
40	0.08936378	9.11418250	0.81447784		40.00000000	0.85850000	7.82452568	0.875254
41	0.09950636	9.10004710	0.90551259		41.00000000	0.83756098	7.62184433	0.896597
42	0.10928874	9.11596490	0.99627232		42.00000000	0.81761905	7.45338654	0.917973
43	0.11947821	9.10156250	1.08743840		43.00000000	0.79860465	7.26855015	0.939451
44	0.12930003	9.10473820	1.17724292		44.00000000	0.78045455	7.10583431	0.960824
45	0.13944708	9.12372210	1.27227641		45.00000000	0.76311111	6.96241371	0.982187
46	0.14927337	9.09910110	1.35825349		46.00000000	0.74652174	6.79267678	1.003562
47	0.15938394	9.12549590	1.45445749		47.00000000	0.73063830	6.66743679	1.025043
48	0.16954216	9.10119530	1.54303631		48.00000000	0.71541667	6.51114680	1.046435
49	0.17940044	9.10434150	1.63332287		49.00000000	0.70081633	6.38047117	1.067789
50	0.18949465	9.11260890	1.72679063		50.00000000	0.68680000	6.25853979	1.089168
51	0.19929935	9.10562800	1.81474574		51.00000000	0.67333333	6.13112285	1.110653
52	0.20944417	9.10652260	1.90730807		52.00000000	0.66038462	6.01380742	1.132025
53	0.21925706	9.10891060	1.99719296		53.00000000	0.64792453	5.90188660	1.153396
54	0.22941452	9.10670760	2.08921095		54.00000000	0.63592593	5.79119146	1.174756
55	0.23924899	9.11463170	2.18066643		55.00000000	0.62436364	5.69084459	1.196240
56	0.24941167	9.09891890	2.26937656		56.00000000	0.61321429	5.57958705	1.217646
57	0.25954607	9.10660550	2.36358367		57.00000000	0.60245614	5.48633040	1.239032
58	0.26936790	9.10790440	2.45337708		58.00000000	0.59206897	5.39250754	1.260387
59	0.27949113	9.09414580	2.54173309		59.00000000	0.58203390	5.29310113	1.281850
60	0.28933007	9.11086460	2.63604709		60.00000000	0.57233333	5.21445151	1.303225
61	0.29948753	9.10125730	2.72571307		61.00000000	0.56295082	5.12356026	1.324612
62	0.30928332	9.09998700	2.81447419		62.00000000	0.55387097	5.04021861	1.346112
63	0.31944153	9.11087800	2.91039281		63.00000000	0.54507937	4.96615160	1.367484
64	0.32927078	9.10266590	2.99724190		64.00000000	0.53656250	4.88414917	1.388844
65	0.33939847	9.09934430	3.08830353		65.00000000	0.52830769	4.80725359	1.410228
66	0.34923965	9.09558770	3.17653986		66.00000000	0.52030303	4.73246184	1.431706
67	0.35940456	9.10292910	3.27163423		67.00000000	0.51253731	4.66559083	1.453097
68	0.36956725	9.09949970	3.36287708		68.00000000	0.50500000	4.59524735	1.474486
69	0.37936300	9.09546280	3.45048205		69.00000000	0.49768116	4.52664047	1.495853
70	0.38952196	9.10806940	3.54779304		70.00000000	0.49057143	4.46815862	1.517343
71	0.39934304	9.09270760	3.63110949		71.00000000	0.48366197	4.39779689	1.538717
72	0.40948561	9.10559080	3.72860840		72.00000000	0.47694444	4.34286095	1.560067
73	0.41928214	9.09822650	3.81472388		73.00000000	0.47041096	4.27990545	1.581453
74	0.42945746	9.09693620	3.90674711		74.00000000	0.46405405	4.22147012	1.602928
75	0.43926662	9.10545920	3.99972429		75.00000000	0.45786667	4.16908625	1.624308
76	0.44942412	9.08438490	4.08274169		76.00000000	0.45184211	4.10470760	1.645664
77	0.45955554	9.08535290	4.17522426		77.00000000	0.44597403	4.05183141	1.667033
78	0.46942720	9.09921460	4.27141883		78.00000000	0.44025641	4.00598756	1.688509
79	0.47956532	9.06964490	4.34948716		79.00000000	0.43468354	3.94242539	1.709878
80	0.48936185	9.07923600	4.44303173		80.00000000	0.42925000	3.89726205	1.731218
81	0.49948731	9.05580330	4.52325883		81.00000000	0.42395062	3.83921340	1.752592
82	0.50931954	9.04902550	4.60884551		82.00000000	0.41878049	3.78955531	1.774075
83	0.51947552	9.01207640	4.68155307		83.00000000	0.41373494	3.72861089	1.795458
84	0.52922815	8.97706990	4.75091810		84.00000000	0.40880952	3.66991167	1.816843
85	0.53942579	8.94830510	4.82694655		85.00000000	0.40400000	3.61511526	1.838224
86	0.54953045	8.87271600	4.87582762		86.00000000	0.39930233	3.54289613	1.859696
87	0.55933958	8.79604430	4.91997572		87.00000000	0.39471264	3.47190990	1.881085
88	0.56946355	8.65562250	4.92906152		88.00000000	0.39022727	3.37765996	1.902469
89	0.57930768	8.47861960	4.91172945		89.00000000	0.38584270	3.27141345	1.923807
90	0.58942944	8.22769070	4.84964312		90.00000000	0.38155556	3.13932110	1.945272
91	0.59924608	7.89115430	4.72874328		91.00000000	0.37736264	2.97782680	1.966644
92	0.60936260	7.42921920	4.52708833		92.00000000	0.37326087	2.77303682	1.988118
93	0.61915839	6.83670470	4.23300307		93.00000000	0.36924731	2.52443483	2.009617
94	0.62926894	6.01386590	3.78433902		94.00000000	0.36531915	2.19698037	2.031001
95	0.63937432	4.98370360	3.18645210		95.00000000	0.36147368	1.80147770	2.052373
96	0.64918572	3.71065260	2.40890268		96.00000000	0.35770833	1.32733136	2.073758
97	0.65927696	2.08251930	1.37295699		97.00000000	0.35402062	0.73725477	2.095266
98	0.66900277	0.17288838	0.11566281		98.00000000	0.35040816	0.06058150	2.116662
99	0.67909551	-2.18547200	-1.48414422		99.00000000	0.34686869	-0.75807180	2.138012
100	0.68879527	-4.89577390	-3.37218591		100.00000000	0.34340000	-1.68120876	2.159383
101	0.69905019	-8.16670510	-5.70893675		101.00000000	0.34000000	-2.77667973	2.180882
00:11 04/04/2018
Test Lot:	JK-PERC
Recipe:	Recipe_YJX-LID
Cell Name:	3-6-1h
Test Order:	3
Test Condition:	Light
1	-0.29992351	9.10508920	-2.73083031		1.00000000	34.34000000	312.66876313	0.000000
2	-0.29007462	9.10893060	-2.64226958		2.00000000	17.17000000	156.40033840	0.021592
3	-0.27998757	9.11634730	-2.55246393		3.00000000	11.44666667	104.35178876	0.042985
4	-0.27017590	9.10656550	-2.46037453		4.00000000	8.58500000	78.17986482	0.064344
5	-0.26004270	9.11285590	-2.36973165		5.00000000	6.86800000	62.58709432	0.085714
6	-0.24990205	9.10780720	-2.27605969		6.00000000	5.72333333	52.12701654	0.107192
7	-0.24005316	9.10292910	-2.18518690		7.00000000	4.90571429	44.65636933	0.128571
8	-0.22991697	9.10204320	-2.09271419		8.00000000	4.29250000	39.07052044	0.149916
9	-0.22004874	9.11215310	-2.00511781		9.00000000	3.81555556	34.76792638	0.171283
10	-0.20989992	9.10788730	-1.91174482		10.00000000	3.43400000	31.27648499	0.192759
11	-0.20008823	9.10231490	-1.82126608		11.00000000	3.12181818	28.41577215	0.214130
12	-0.18990666	9.10516550	-1.72913157		12.00000000	2.86166667	26.05594861	0.235473
13	-0.18011582	9.10297110	-1.63958910		13.00000000	2.64153846	24.04584827	0.256860
14	-0.17000420	9.10483550	-1.54786028		14.00000000	2.45285714	22.33286079	0.278341
15	-0.16016796	9.09792900	-1.45719673		15.00000000	2.28933333	20.82819212	0.299720
16	-0.15007049	9.11025240	-1.36718004		16.00000000	2.14625000	19.55287921	0.321109
17	-0.13986585	9.10000230	-1.27277956		17.00000000	2.02000000	18.38200465	0.342479
18	-0.13004449	9.11874200	-1.18584215		18.00000000	1.90777778	17.39653335	0.363956
19	-0.11993288	9.10140230	-1.09155739		19.00000000	1.80736842	16.44958710	0.385329
20	-0.11008026	9.10111520	-1.00185313		20.00000000	1.71700000	15.62661480	0.406701
21	-0.09992994	9.11990830	-0.91135193		21.00000000	1.63523810	14.91322148	0.428059
22	-0.09010860	9.09635730	-0.81965999		22.00000000	1.56090909	14.19858680	0.449528
23	-0.07995902	9.10929580	-0.72837037		23.00000000	1.49304348	13.60057469	0.470892
24	-0.07013544	9.11327650	-0.63916363		24.00000000	1.43083333	13.03957979	0.492279
25	-0.06000224	9.09792610	-0.54589593		25.00000000	1.37360000	12.49691129	0.513755
26	-0.04988839	9.10835460	-0.45440112		26.00000000	1.32076923	12.03003450	0.535197
27	-0.04004917	9.09605310	-0.36428940		27.00000000	1.27185185	11.56883198	0.556577
28	-0.02992416	9.10741520	-0.27253175		28.00000000	1.22642857	11.16959421	0.577958
29	-0.02008718	9.10064600	-0.18280631		29.00000000	1.18413793	10.77642013	0.599291
30	-0.00995696	9.10347180	-0.09064287		30.00000000	1.14466667	10.42044072	0.620781
31	-0.00066776	9.10836980	-0.00608216		31.00000000	1.10774194	10.08972319	0.642280
32	0.00946896	9.10678100	0.08623173		32.00000000	1.07312500	9.77271436	0.663696
33	0.01931385	9.09945770	0.17574554		33.00000000	1.04060606	9.46895083	0.685039
34	0.02941029	9.10319140	0.26772750		34.00000000	1.01000000	9.19422331	0.706511
35	0.03924476	9.11210350	0.35760231		35.00000000	0.98114286	8.94027526	0.727894
36	0.04939702	9.10414790	0.44971776		36.00000000	0.95388889	8.68434552	0.749274
37	0.05922033	9.10175420	0.53900884		37.00000000	0.92810811	8.44741187	0.770623
38	0.06936365	9.10608010	0.63163099		38.00000000	0.90368421	8.22902081	0.792099
39	0.07951219	9.10005860	0.72356562		39.00000000	0.88051282	8.01271826	0.813459
40	0.08933922	9.10462470	0.81340006		40.00000000	0.85850000	7.81632030	0.834845
41	0.09950488	9.10409450	0.90590184		41.00000000	0.83756098	7.62523427	0.856332
42	0.10930437	9.10806470	0.99555127		42.00000000	0.81761905	7.44692719	0.877701
43	0.11948565	9.10993000	1.08850591		43.00000000	0.79860465	7.27523247	0.899051
44	0.12928067	9.09076120	1.17525970		44.00000000	0.78045455	7.09492590	0.920440
45	0.13946196	9.11100480	1.27063859		45.00000000	0.76311111	6.95270900	0.941906
46	0.14928527	9.10707660	1.35955239		46.00000000	0.74652174	6.79863066	0.963295
47	0.15942116	9.09812640	1.45043386		47.00000000	0.73063830	6.64743959	0.984643
48	0.16954736	9.11360550	1.54518775		48.00000000	0.71541667	6.52002527	1.006020
49	0.17939003	9.10381700	1.63313400		49.00000000	0.70081633	6.38010359	1.027497
50	0.18953484	9.09103490	1.72306785		50.00000000	0.68680000	6.24372277	1.048877
51	0.19932912	9.10330010	1.81455280		51.00000000	0.67333333	6.12955540	1.070221
52	0.20946501	9.10823820	1.90785721		52.00000000	0.66038462	6.01494038	1.091601
53	0.21926078	9.10226540	1.99576981		53.00000000	0.64792453	5.89758102	1.113070
54	0.22940187	9.10453990	2.08859848		54.00000000	0.63592593	5.78981297	1.134437
55	0.23926611	9.09894750	2.17706977		55.00000000	0.62436364	5.68105195	1.155797
56	0.24940945	9.10521890	2.27092764		56.00000000	0.61321429	5.58345030	1.177160
57	0.25955725	9.10709000	2.36381124		57.00000000	0.60245614	5.48662229	1.198643
58	0.26937607	9.09627720	2.45031940		58.00000000	0.59206897	5.38562343	1.220035
59	0.27951717	9.10479350	2.54494611		59.00000000	0.58203390	5.29929845	1.241386
60	0.28932261	9.10969160	2.63563975		60.00000000	0.57233333	5.21378016	1.262781
61	0.29946148	9.10780910	2.72743799		61.00000000	0.56295082	5.12724860	1.284264
62	0.30926991	9.09489060	2.81277600		62.00000000	0.55387097	5.03739586	1.305644
63	0.31942290	9.09824660	2.90618831		63.00000000	0.54507937	4.95926648	1.327018
64	0.32927451	9.10085300	2.99667891		64.00000000	0.53656250	4.88317644	1.348384
65	0.33941039	9.10198780	3.08930923		65.00000000	0.52830769	4.80865017	1.369856
66	0.34922326	9.09779930	3.17716313		66.00000000	0.52030303	4.73361254	1.391239
67	0.35939413	9.09984490	3.27043084		67.00000000	0.51253731	4.66401006	1.412617
68	0.36954567	9.10526750	3.36481218		68.00000000	0.50500000	4.59816009	1.433955
69	0.37937418	9.09121890	3.44897372		69.00000000	0.49768116	4.52452836	1.455416
70	0.38947955	9.11351490	3.54952768		70.00000000	0.49057143	4.47083002	1.476789
71	0.39934453	9.09253690	3.63105487		71.00000000	0.48366197	4.39771433	1.498175
72	0.40947744	9.10386560	3.72782758		72.00000000	0.47694444	4.34203812	1.519668
73	0.41930073	9.10564420	3.81800326		73.00000000	0.47041096	4.28339482	1.541041
74	0.42943215	9.10695460	3.91081909		74.00000000	0.46405405	4.22611920	1.562400
75	0.43926960	9.09775540	3.99636738		75.00000000	0.45786667	4.16555894	1.583783
76	0.44944048	9.09934620	4.08961452		76.00000000	0.45184211	4.11146774	1.605235
77	0.45956445	9.08972640	4.17731511		77.00000000	0.44597403	4.05378188	1.626618
78	0.46943912	9.07407570	4.25972611		78.00000000	0.44025641	3.99491999	1.647966
79	0.47956011	9.08028600	4.35454295		79.00000000	0.43468354	3.94705090	1.669334
80	0.48936555	9.06721880	4.43718452		80.00000000	0.42925000	3.89210367	1.690816
81	0.49953866	9.05894370	4.52529260		81.00000000	0.42395062	3.84054477	1.712189
82	0.50934857	9.04679490	4.60797205		82.00000000	0.41878049	3.78862118	1.733548
83	0.51946437	9.01461980	4.68277380		83.00000000	0.41373494	3.72966318	1.754943
84	0.52926904	8.99239540	4.75939648		84.00000000	0.40880952	3.67617688	1.776420
85	0.53940719	8.92607690	4.81479006		85.00000000	0.40400000	3.60613507	1.797803
86	0.54955274	8.91300960	4.89816885		86.00000000	0.39930233	3.55898546	1.819162
87	0.55937904	8.76859760	4.90496971		87.00000000	0.39471264	3.46107634	1.840538
88	0.56949484	8.66592880	4.93520174		88.00000000	0.39022727	3.38168176	1.862020
89	0.57932407	8.48355670	4.91472860		89.00000000	0.38584270	3.27331839	1.883382
90	0.58944064	8.22953510	4.85082244		90.00000000	0.38155556	3.14002484	1.904730
91	0.59924382	7.91383460	4.74231648		91.00000000	0.37736264	2.98638550	1.926100
92	0.60936409	7.45060630	4.54013193		92.00000000	0.37326087	2.78101979	1.947571
93	0.61912709	6.86801720	4.25217550		93.00000000	0.36924731	2.53599689	1.968951
94	0.62924808	6.05187420	3.80813022		94.00000000	0.36531915	2.21086553	1.990430
95	0.63935941	5.02227690	3.21104000		95.00000000	0.36147368	1.81542093	2.011867
96	0.64916116	3.74851630	2.43339119		96.00000000	0.35770833	1.34087552	2.033367
97	0.65926582	2.10603880	1.38843940		97.00000000	0.35402062	0.74558116	2.054760
98	0.66898638	0.18040326	0.12068732		98.00000000	0.35040816	0.06321477	2.076134
99	0.67908132	-2.21524570	-1.50433197		99.00000000	0.34686869	-0.76839937	2.097533
100	0.68878704	-4.98531720	-3.43382188		100.00000000	0.34340000	-1.71195793	2.119027
101	0.69904649	-8.33435920	-5.82610455		101.00000000	0.34000000	-2.83368213	2.140407
00:11 04/04/2018
Test Lot:	JK-PERC
Recipe:	Recipe_YJX-LID
Cell Name:	3-6-1h
Test Order:	4
Test Condition:	Light
1	-0.29990491	9.11313530	-2.73307402		1.00000000	34.34000000	312.94506620	0.000000
2	-0.29006720	9.10764120	-2.64182798		2.00000000	17.17000000	156.37819940	0.061791
3	-0.27993175	9.10124970	-2.54772876		3.00000000	11.44666667	104.17897157	0.083221
4	-0.27012977	9.11099910	-2.46115209		4.00000000	8.58500000	78.21792727	0.104582
5	-0.25996381	9.10740760	-2.36759638		5.00000000	6.86800000	62.54967540	0.126065
6	-0.24982762	9.10529800	-2.27475493		6.00000000	5.72333333	52.11265555	0.147442
7	-0.24002935	9.10727210	-2.18601260		7.00000000	4.90571429	44.67767484	0.168834
8	-0.22985001	9.11216740	-2.09443177		8.00000000	4.29250000	39.11397856	0.190324
9	-0.22005321	9.10452180	-2.00347925		9.00000000	3.81555556	34.73880873	0.211756
10	-0.20986940	9.10242940	-1.91032140		10.00000000	3.43400000	31.25774256	0.233115
11	-0.20006293	9.12810990	-1.82619641		11.00000000	3.12181818	28.49629945	0.254486
12	-0.18991336	9.10010620	-1.72823174		12.00000000	2.86166667	26.04147058	0.275979
13	-0.18013071	9.10079570	-1.63933279		13.00000000	2.64153846	24.04010187	0.297354
14	-0.16996774	9.10770990	-1.54801687		14.00000000	2.45285714	22.33991128	0.318712
15	-0.16016276	9.10029790	-1.45752883		15.00000000	2.28933333	20.83361533	0.340096
16	-0.15003254	9.09924320	-1.36518257		16.00000000	2.14625000	19.52925072	0.361577
17	-0.13985170	9.11167140	-1.27428274		17.00000000	2.02000000	18.40557623	0.382949
18	-0.13005492	9.10691550	-1.18439917		18.00000000	1.90777778	17.37397102	0.404306
19	-0.11988971	9.10134120	-1.09115716		19.00000000	1.80736842	16.44947667	0.425676
20	-0.11008622	9.10525610	-1.00236323		20.00000000	1.71700000	15.63372472	0.447156
21	-0.09990986	9.09790800	-0.90897069		21.00000000	1.63523810	14.87724575	0.468542
22	-0.09006171	9.10135460	-0.81968355		22.00000000	1.56090909	14.20638713	0.489892
23	-0.07992107	9.10536290	-0.72771032		23.00000000	1.49304348	13.59470270	0.511309
24	-0.07013693	9.10479260	-0.63858217		24.00000000	1.43083333	13.02744075	0.532786
25	-0.05997768	9.09962080	-0.54577412		25.00000000	1.37360000	12.49923913	0.554171
26	-0.04978494	9.10130310	-0.45310779		26.00000000	1.32076923	12.02072109	0.575534
27	-0.03998145	9.10971260	-0.36421949		27.00000000	1.27185185	11.58620484	0.596916
28	-0.02985346	9.09919830	-0.27164252		28.00000000	1.22642857	11.15951677	0.618404
29	-0.02003731	9.10478210	-0.18243538		29.00000000	1.18413793	10.78131784	0.639784
30	-0.00991677	9.10896300	-0.09033145		30.00000000	1.14466667	10.42672631	0.661157
31	-0.00060970	9.10062890	-0.00554868		31.00000000	1.10774194	10.08114827	0.682625
32	0.00954115	9.10920330	0.08691229		32.00000000	1.07312500	9.77531379	0.704102
33	0.01932129	9.10552500	0.17593048		33.00000000	1.04060606	9.47526450	0.725469
34	0.02949216	9.10086540	0.26840416		34.00000000	1.01000000	9.19187405	0.746846
35	0.03931025	9.10074230	0.35775249		35.00000000	0.98114286	8.92912830	0.768194
36	0.04945284	9.09580900	0.44981360		36.00000000	0.95388889	8.67639114	0.789666
37	0.05928582	9.11704350	0.54051140		37.00000000	0.92810811	8.46160199	0.811054
38	0.06941129	9.09600260	0.63136523		38.00000000	0.90368421	8.21991393	0.832447
39	0.07956355	9.10261920	0.72423671		39.00000000	0.88051282	8.01497291	0.853912
40	0.08936378	9.10082240	0.81328393		40.00000000	0.85850000	7.81305603	0.875297
41	0.09952870	9.10452840	0.90616188		41.00000000	0.83756098	7.62559769	0.896635
42	0.10933563	9.10174660	0.99514520		42.00000000	0.81761905	7.44176139	0.918004
43	0.11948640	9.10460570	1.08787656		43.00000000	0.79860465	7.27098046	0.939504
44	0.12930524	9.10455510	1.17726668		44.00000000	0.78045455	7.10569141	0.960882
45	0.13947165	9.10190870	1.26945822		45.00000000	0.76311111	6.94576766	0.982226
46	0.14929198	9.11121460	1.36023127		46.00000000	0.74652174	6.80171977	1.003604
47	0.15944870	9.10220430	1.45133464		47.00000000	0.73063830	6.65041906	1.025081
48	0.16954440	9.10036660	1.54291619		48.00000000	0.71541667	6.51055394	1.046467
49	0.17939375	9.11159800	1.63456373		49.00000000	0.70081633	6.38555664	1.067831
50	0.18952592	9.10338400	1.72532723		50.00000000	0.68680000	6.25220413	1.089203
51	0.19930382	9.09453010	1.81257459		51.00000000	0.67333333	6.12365027	1.110675
52	0.20949033	9.11875440	1.91029087		52.00000000	0.66038462	6.02188512	1.132053
53	0.21927567	9.09967230	1.99533674		53.00000000	0.64792453	5.89590088	1.153402
54	0.22944133	9.11356540	2.09102857		54.00000000	0.63592593	5.79555252	1.174777
55	0.23926091	9.09983730	2.17723535		55.00000000	0.62436364	5.68160751	1.196258
56	0.24943848	9.10542010	2.27124215		56.00000000	0.61321429	5.58357368	1.217636
57	0.25956917	9.10787490	2.36412353		57.00000000	0.60245614	5.48709516	1.238993
58	0.26940513	9.10188670	2.45209497		58.00000000	0.59206897	5.38894464	1.260365
59	0.27952239	9.10689160	2.54558011		59.00000000	0.58203390	5.30051962	1.281840
60	0.28937697	9.09468080	2.63179117		60.00000000	0.57233333	5.20518898	1.303221
61	0.29951432	9.10739230	2.72779441		61.00000000	0.56295082	5.12701396	1.324583
62	0.30932349	9.09566020	2.81350136		62.00000000	0.55387097	5.03782212	1.345941
63	0.31947652	9.09548660	2.90579441		63.00000000	0.54507937	4.95776206	1.367405
64	0.32929015	9.10094740	2.99685233		64.00000000	0.53656250	4.88322709	1.388772
65	0.33946845	9.10399440	3.09051887		65.00000000	0.52830769	4.80971027	1.410144
66	0.34926051	9.09228900	3.17557749		66.00000000	0.52030303	4.73074552	1.431513
67	0.35941127	9.10303970	3.27173506		67.00000000	0.51253731	4.66564751	1.452993
68	0.36957842	9.11602590	3.36908645		68.00000000	0.50500000	4.60359308	1.474378
69	0.37940842	9.08624940	3.44739953		69.00000000	0.49768116	4.52205514	1.495765
70	0.38955250	9.10562990	3.54712089		70.00000000	0.49057143	4.46696187	1.517239
71	0.39933488	9.10352710	3.63535590		71.00000000	0.48366197	4.40302987	1.538620
72	0.40950200	9.09243970	3.72337224		72.00000000	0.47694444	4.33658860	1.559974
73	0.41932756	9.08455850	3.80940575		73.00000000	0.47041096	4.27347588	1.581344
74	0.42947683	9.10958860	3.91235723		74.00000000	0.46405405	4.22734152	1.602828
75	0.43929866	9.08733940	3.99205602		75.00000000	0.45786667	4.16078980	1.624206
76	0.44946432	9.08903500	4.08519694		76.00000000	0.45184211	4.10680871	1.645555
77	0.45958456	9.08201690	4.17395474		77.00000000	0.44597403	4.05034364	1.666936
78	0.46944582	9.09481720	4.26952392		78.00000000	0.44025641	4.00405157	1.688405
79	0.47957057	9.07537170	4.35228118		79.00000000	0.43468354	3.94491474	1.709787
80	0.48939386	9.06213760	4.43495450		80.00000000	0.42925000	3.88992256	1.731152
81	0.49953273	9.06267450	4.52710253		81.00000000	0.42395062	3.84212645	1.752532
82	0.50935453	9.04072860	4.60493607		82.00000000	0.41878049	3.78608073	1.774006
83	0.51949716	9.01721570	4.68441795		83.00000000	0.41373494	3.73073719	1.795384
84	0.52927577	8.97944550	4.75260293		84.00000000	0.40880952	3.67088284	1.816735
85	0.53938782	8.93673710	4.82036714		85.00000000	0.40400000	3.61044179	1.838116
86	0.54957289	8.88238140	4.88151602		86.00000000	0.39930233	3.54675555	1.859588
87	0.55938649	8.76354120	4.90220655		87.00000000	0.39471264	3.45908052	1.880957
88	0.56951940	8.65694430	4.93029772		88.00000000	0.39022727	3.37817576	1.902324
89	0.57932413	8.46289250	4.90275783		89.00000000	0.38584270	3.26534526	1.923700
90	0.58946002	8.22861190	4.85043774		90.00000000	0.38155556	3.13967258	1.945188
91	0.59927064	7.86812690	4.71513744		91.00000000	0.37736264	2.96913712	1.966575
92	0.60937601	7.41687770	4.51966734		92.00000000	0.37326087	2.76843022	1.988051
93	0.61916953	6.79690170	4.20843443		93.00000000	0.36924731	2.50973768	2.009439
94	0.62930471	5.99522400	3.77282270		94.00000000	0.36531915	2.19017013	2.030938
95	0.63940114	4.97871450	3.18339573		95.00000000	0.36147368	1.79967427	2.052316
96	0.64920956	3.68812700	2.39436731		96.00000000	0.35770833	1.31927376	2.073703
97	0.65932757	2.06653760	1.36252521		97.00000000	0.35402062	0.73159692	2.095046
98	0.66902661	0.15966322	0.10681894		98.00000000	0.35040816	0.05594730	2.116522
99	0.67912751	-2.19505880	-1.49072482		99.00000000	0.34686869	-0.76139716	2.137898
100	0.68886524	-4.87171940	-3.35595815		100.00000000	0.34340000	-1.67294844	2.159288
101	0.69901526	-8.10688590	-5.66683696		101.00000000	0.34000000	-2.75634121	2.180765
