# Supplementary material for: Study on the Electrical Injection Regeneration of Industrialized B-Doped Czochralski Silicon PERC Solar Cells
Source: Hindawi journal article supplement (doi:10.1155/2019/5357370), 2019-06-20
Supplement: f1 [file 5357370.f1.zip › section3.3/IVRawData_3-6-2.5h.csv]

01:48 04/04/2018
Test Lot:	JK-PERC
Recipe:	Recipe_YJX-LID
Cell Name:	3-6-2.5h
Test Order:	2
Test Condition:	Light
1	-0.29991618	9.10389330	-2.73040490		1.00000000	34.34000000	312.62769592	0.000000
2	-0.29004571	9.12245850	-2.64592995		2.00000000	17.17000000	156.63261245	0.061879
3	-0.27995497	9.11083790	-2.55062435		3.00000000	11.44666667	104.28872450	0.083299
4	-0.27011353	9.12319950	-2.46429962		4.00000000	8.58500000	78.32266771	0.104798
5	-0.25995058	9.10512830	-2.36688338		5.00000000	6.86800000	62.53402116	0.126184
6	-0.24980922	9.13476940	-2.28194962		6.00000000	5.72333333	52.28133020	0.147574
7	-0.23996036	9.10824580	-2.18561794		7.00000000	4.90571429	44.68245154	0.168927
8	-0.22985472	9.13334470	-2.09934239		8.00000000	4.29250000	39.20488212	0.190404
9	-0.21999542	9.10447410	-2.00294260		9.00000000	3.81555556	34.73862673	0.211789
10	-0.20986597	9.11335090	-1.91258223		10.00000000	3.43400000	31.29524699	0.233171
11	-0.20002306	9.11824420	-1.82385911		11.00000000	3.12181818	28.46550053	0.254636
12	-0.18989211	9.11484620	-1.73083738		12.00000000	2.86166667	26.08365154	0.276039
13	-0.18010947	9.12139030	-1.64284877		13.00000000	2.64153846	24.09450330	0.297394
14	-0.16995993	9.11936570	-1.54992676		14.00000000	2.45285714	22.36850130	0.318767
15	-0.16014306	9.10793880	-1.45857319		15.00000000	2.28933333	20.85110789	0.340258
16	-0.15000169	9.11298560	-1.36696324		16.00000000	2.14625000	19.55874534	0.361632
17	-0.13984396	9.12181090	-1.27563016		17.00000000	2.02000000	18.42605802	0.382989
18	-0.13002634	9.11672210	-1.18541401		18.00000000	1.90777778	17.39267983	0.404358
19	-0.11988796	9.11745640	-1.09307325		19.00000000	1.80736842	16.47860278	0.425835
20	-0.11010087	9.09693910	-1.00158091		20.00000000	1.71700000	15.61944443	0.447231
21	-0.09993717	9.12386700	-0.91181346		21.00000000	1.63523810	14.91969489	0.468576
22	-0.09012031	9.10361290	-0.82042040		22.00000000	1.56090909	14.20991214	0.489939
23	-0.07995810	9.12081240	-0.72928287		23.00000000	1.49304348	13.61776947	0.511410
24	-0.07017919	9.11163710	-0.63944735		24.00000000	1.43083333	13.03723408	0.532778
25	-0.06000434	9.10515210	-0.54634860		25.00000000	1.37360000	12.50683692	0.554131
26	-0.04984734	9.11618800	-0.45441774		26.00000000	1.32076923	12.04038061	0.575515
27	-0.04007067	9.11739160	-0.36533997		27.00000000	1.27185185	11.59597139	0.596992
28	-0.02982957	9.10479450	-0.27159210		28.00000000	1.22642857	11.16638011	0.618357
29	-0.02005959	9.11259650	-0.18279498		29.00000000	1.18413793	10.79057117	0.639709
30	-0.00991897	9.11327270	-0.09039430		30.00000000	1.14466667	10.43165948	0.661083
31	-0.00066179	9.11867330	-0.00603469		31.00000000	1.10774194	10.10113681	0.682676
32	0.00946894	9.11975480	0.08635445		32.00000000	1.07312500	9.78663687	0.704055
33	0.01931679	9.10744480	0.17592657		33.00000000	1.04060606	9.47726226	0.725410
34	0.02949210	9.11511040	0.26882374		34.00000000	1.01000000	9.20626150	0.746778
35	0.03930347	9.11255650	0.35815513		35.00000000	0.98114286	8.94071972	0.768256
36	0.04942148	9.11468600	0.45046125		36.00000000	0.95388889	8.69439770	0.789644
37	0.05926783	9.10935400	0.53989168		37.00000000	0.92810811	8.45446531	0.811037
38	0.06942380	9.11321070	0.63267367		38.00000000	0.90368421	8.23546462	0.832379
39	0.07954329	9.11285690	0.72486657		39.00000000	0.88051282	8.02398733	0.853856
40	0.08935764	9.11695290	0.81466937		40.00000000	0.85850000	7.82690406	0.875244
41	0.09953667	9.10715290	0.90649569		41.00000000	0.83756098	7.62779587	0.896616
42	0.10928702	9.11848830	0.99653241		42.00000000	0.81761905	7.45544972	0.918098
43	0.11950773	9.10943790	1.08864825		43.00000000	0.79860465	7.27483948	0.939487
44	0.12933920	9.11666580	1.17914226		44.00000000	0.78045455	7.11514326	0.960834
45	0.13946316	9.11863330	1.27171341		45.00000000	0.76311111	6.95853039	0.982211
46	0.14930579	9.10288910	1.35911405		46.00000000	0.74652174	6.79550460	1.003695
47	0.15946026	9.12826630	1.45559572		47.00000000	0.73063830	6.66946095	1.025069
48	0.16958199	9.09990690	1.54318032		48.00000000	0.71541667	6.51022506	1.046434
49	0.17942835	9.14357280	1.64061618		49.00000000	0.70081633	6.40796510	1.067814
50	0.18954560	9.10073570	1.72500441		50.00000000	0.68680000	6.25038528	1.089286
51	0.19928181	9.11855510	1.81716216		51.00000000	0.67333333	6.13982710	1.110679
52	0.20945117	9.10211470	1.90644857		52.00000000	0.66038462	6.01089652	1.132022
53	0.21926701	9.10541250	1.99651657		53.00000000	0.64792453	5.89962010	1.153396
54	0.22941925	9.10812950	2.08958024		54.00000000	0.63592593	5.79209569	1.174889
55	0.23920979	9.12056730	2.18172899		55.00000000	0.62436364	5.69455057	1.196264
56	0.24938585	9.10482120	2.27061357		56.00000000	0.61321429	5.58320643	1.217598
57	0.25954777	9.11185550	2.36496178		57.00000000	0.60245614	5.48949330	1.238981
58	0.26937103	9.11116980	2.45428519		58.00000000	0.59206897	5.39444088	1.260447
59	0.27953890	9.10307600	2.54466385		59.00000000	0.58203390	5.29829881	1.281823
60	0.28934807	9.11104300	2.63626271		60.00000000	0.57233333	5.21455361	1.303190
61	0.29947871	9.10544200	2.72688602		61.00000000	0.56295082	5.12591604	1.324565
62	0.30931464	9.10840320	2.81736246		62.00000000	0.55387097	5.04488009	1.346038
63	0.31945348	9.11091610	2.91051385		63.00000000	0.54507937	4.96617236	1.367413
64	0.32929093	9.11664390	3.00202815		64.00000000	0.53656250	4.89164924	1.388762
65	0.33937469	9.09851650	3.08780622		65.00000000	0.52830769	4.80681626	1.410141
66	0.34924635	9.10750010	3.18076117		66.00000000	0.52030303	4.73865990	1.431620
67	0.35940304	9.11489010	3.27591921		67.00000000	0.51253731	4.67172128	1.452995
68	0.36953595	9.10798550	3.36572807		68.00000000	0.50500000	4.59953268	1.474392
69	0.37940907	9.10240650	3.45353558		69.00000000	0.49768116	4.53009622	1.495734
70	0.38949212	9.10956950	3.54810554		70.00000000	0.49057143	4.46889452	1.517207
71	0.39935187	9.10361290	3.63554484		71.00000000	0.48366197	4.40307137	1.538597
72	0.40948400	9.10489650	3.72830944		72.00000000	0.47694444	4.34252980	1.559976
73	0.41932142	9.10604670	3.81836043		73.00000000	0.47041096	4.28358416	1.581446
74	0.42947665	9.09860520	3.90763848		74.00000000	0.46405405	4.22224463	1.602829
75	0.43925008	9.09735300	3.99601303		75.00000000	0.45786667	4.16537469	1.624172
76	0.44941422	9.10409070	4.09150782		76.00000000	0.45184211	4.11361151	1.645547
77	0.45955381	9.08848000	4.17664561		77.00000000	0.44597403	4.05322602	1.667031
78	0.46941727	9.06749530	4.25643889		78.00000000	0.44025641	3.99202293	1.688396
79	0.47955239	9.08701800	4.35770120		79.00000000	0.43468354	3.94997719	1.709753
80	0.48939726	9.07474800	4.44115681		80.00000000	0.42925000	3.89533558	1.731128
81	0.49950856	9.05924890	4.52517237		81.00000000	0.42395062	3.84067416	1.752601
82	0.50934225	9.04619030	4.60760692		82.00000000	0.41878049	3.78836799	1.773997
83	0.51948631	9.02733140	4.68957508		83.00000000	0.41373494	3.73492241	1.795365
84	0.52924860	8.98079590	4.75307366		84.00000000	0.40880952	3.67143490	1.816737
85	0.53943282	8.93998340	4.82252046		85.00000000	0.40400000	3.61175329	1.838222
86	0.54953372	8.87008860	4.87441279		86.00000000	0.39930233	3.54184701	1.859590
87	0.55932724	8.77652930	4.90895191		87.00000000	0.39471264	3.46420708	1.880928
88	0.56949437	8.65244390	4.92751809		88.00000000	0.39022727	3.37641959	1.902319
89	0.57927001	8.45630930	4.89848637		89.00000000	0.38584270	3.26280518	1.923796
90	0.58941478	8.22566990	4.84833141		90.00000000	0.38155556	3.13855005	1.945189
91	0.59923959	7.87571720	4.71944155		91.00000000	0.37736264	2.97200141	1.966536
92	0.60938960	7.43308500	4.52964469		92.00000000	0.37326087	2.77447977	1.988004
93	0.61915410	6.80884500	4.21572430		93.00000000	0.36924731	2.51414771	2.009508
94	0.62927431	5.99876070	3.77486600		94.00000000	0.36531915	2.19146215	2.030935
95	0.63936031	4.95102450	3.16548856		95.00000000	0.36147368	1.78966507	2.052320
96	0.64916199	3.66211560	2.37730625		96.00000000	0.35770833	1.30996927	2.073743
97	0.65928149	2.04489760	1.34816314		97.00000000	0.35402062	0.72393591	2.095246
98	0.66897231	0.10213216	0.06832359		98.00000000	0.35040816	0.03578794	2.116623
99	0.67910671	-2.25501660	-1.53139690		99.00000000	0.34686869	-0.78219465	2.138014
100	0.68884361	-4.97086620	-3.42414942		100.00000000	0.34340000	-1.70699545	2.159367
101	0.69906586	-8.26650910	-5.77883429		101.00000000	0.34000000	-2.81061309	2.180849
01:49 04/04/2018
Test Lot:	JK-PERC
Recipe:	Recipe_YJX-LID
Cell Name:	3-6-2.5h
Test Order:	3
Test Condition:	Light
1	-0.29993850	9.12233830	-2.73614047		1.00000000	34.34000000	313.26109722	0.000000
2	-0.29004273	9.11046410	-2.64242388		2.00000000	17.17000000	156.42666860	0.021546
3	-0.27994603	9.11300370	-2.55114921		3.00000000	11.44666667	104.31351569	0.043002
4	-0.27014852	9.11811070	-2.46324411		4.00000000	8.58500000	78.27898036	0.064422
5	-0.26001683	9.11476140	-2.36999137		5.00000000	6.86800000	62.60018130	0.085824
6	-0.24984421	9.09228610	-2.27165504		6.00000000	5.72333333	52.03818411	0.107320
7	-0.23999086	9.13243290	-2.19170043		7.00000000	4.90571429	44.80110654	0.128725
8	-0.22987778	9.09927940	-2.09172215		8.00000000	4.29250000	39.05865682	0.150099
9	-0.22003412	9.11237810	-2.00503410		9.00000000	3.81555556	34.76878488	0.171475
10	-0.20984587	9.11371520	-1.91247550		10.00000000	3.43400000	31.29649800	0.192948
11	-0.20005654	9.10890390	-1.82229580		11.00000000	3.12181818	28.43634181	0.214340
12	-0.18990996	9.10794260	-1.72968901		12.00000000	2.86166667	26.06389574	0.235682
13	-0.18009385	9.12222770	-1.64285711		13.00000000	2.64153846	24.09671532	0.257060
14	-0.16995919	9.11526390	-1.54922287		14.00000000	2.45285714	22.35844017	0.278551
15	-0.16015199	9.11322780	-1.45950157		15.00000000	2.28933333	20.86321618	0.299928
16	-0.14998680	9.11185930	-1.36665862		16.00000000	2.14625000	19.55632802	0.321285
17	-0.13988265	9.11578460	-1.27514011		17.00000000	2.02000000	18.41388489	0.342669
18	-0.13004644	9.10767170	-1.18442028		18.00000000	1.90777778	17.37541368	0.364145
19	-0.11985521	9.11292740	-1.09223183		19.00000000	1.80736842	16.47041721	0.385516
20	-0.11009640	9.10301400	-1.00220907		20.00000000	1.71700000	15.62987504	0.406868
21	-0.09989773	9.11309050	-0.91037703		21.00000000	1.63523810	14.90207275	0.428245
22	-0.09010319	9.11395840	-0.82119670		22.00000000	1.56090909	14.22606052	0.449736
23	-0.07997522	9.11634830	-0.72908194		23.00000000	1.49304348	13.61110437	0.471107
24	-0.07015910	9.11260990	-0.63933251		24.00000000	1.43083333	13.03862600	0.492447
25	-0.06003336	9.12080100	-0.54755235		25.00000000	1.37360000	12.52833225	0.513823
26	-0.04980269	9.10688590	-0.45354739		26.00000000	1.32076923	12.02809468	0.535295
27	-0.04001336	9.10829450	-0.36445345		27.00000000	1.27185185	11.58440123	0.556685
28	-0.02989507	9.11627010	-0.27253149		28.00000000	1.22642857	11.18045412	0.578051
29	-0.02006108	9.10685440	-0.18269334		29.00000000	1.18413793	10.78377173	0.599427
30	-0.00995619	9.11347100	-0.09073541		30.00000000	1.14466667	10.43188647	0.620904
31	-0.00064468	9.11026670	-0.00587318		31.00000000	1.10774194	10.09182447	0.642407
32	0.00949574	9.11109160	0.08651652		32.00000000	1.07312500	9.77734017	0.663801
33	0.01930934	9.10787390	0.17586707		33.00000000	1.04060606	9.47770878	0.685138
34	0.02943777	9.11259650	0.26825451		34.00000000	1.01000000	9.20372247	0.706623
35	0.03926626	9.09914400	0.35728937		35.00000000	0.98114286	8.92756014	0.727993
36	0.04941925	9.11021520	0.45021998		36.00000000	0.95388889	8.69013305	0.749375
37	0.05922318	9.10525700	0.53924227		37.00000000	0.92810811	8.45066285	0.770769
38	0.06939551	9.11444760	0.63250176		38.00000000	0.90368421	8.23658238	0.792235
39	0.07953808	9.12170700	0.72552303		39.00000000	0.88051282	8.03177996	0.813630
40	0.08936955	9.08733180	0.81213075		40.00000000	0.85850000	7.80147435	0.835019
41	0.09950393	9.11809440	0.90728620		41.00000000	0.83756098	7.63696004	0.856499
42	0.10933614	9.10971640	0.99602123		42.00000000	0.81761905	7.44827765	0.877869
43	0.11948019	9.10571100	1.08795208		43.00000000	0.79860465	7.27186316	0.899212
44	0.12931761	9.10870360	1.17791578		44.00000000	0.78045455	7.10892913	0.920589
45	0.13947953	9.11354160	1.27115250		45.00000000	0.76311111	6.95464486	0.942065
46	0.14928049	9.11209960	1.36025869		46.00000000	0.74652174	6.80238044	0.963441
47	0.15944687	9.11462120	1.45329782		47.00000000	0.73063830	6.65949132	0.984785
48	0.16956338	9.10372160	1.54365781		48.00000000	0.71541667	6.51295416	1.006164
49	0.17942537	9.11299900	1.63510322		49.00000000	0.70081633	6.38653848	1.027647
50	0.18950392	9.11586480	1.72749211		50.00000000	0.68680000	6.26077594	1.049046
51	0.19928703	9.10138030	1.81378705		51.00000000	0.67333333	6.12826274	1.070410
52	0.20947871	9.11954980	1.91035153		52.00000000	0.66038462	6.02241039	1.091790
53	0.21925361	9.10754680	1.99686251		53.00000000	0.64792453	5.90100296	1.113270
54	0.22943562	9.12207600	2.09292916		54.00000000	0.63592593	5.80096463	1.134636
55	0.23928049	9.10285570	2.17813577		55.00000000	0.62436364	5.68349209	1.155985
56	0.24941562	9.11954780	2.27455767		56.00000000	0.61321429	5.59223699	1.177347
57	0.25954181	9.11357310	2.36535326		57.00000000	0.60245614	5.49052807	1.198824
58	0.26937625	9.10199450	2.45186115		58.00000000	0.59206897	5.38900847	1.220197
59	0.27951360	9.11635490	2.54814518		59.00000000	0.58203390	5.30602758	1.241548
60	0.28935325	9.11068440	2.63620614		60.00000000	0.57233333	5.21434837	1.262926
61	0.29948020	9.10193730	2.72585000		61.00000000	0.56295082	5.12394306	1.284410
62	0.30929232	9.12823770	2.82329382		62.00000000	0.55387097	5.05586585	1.305800
63	0.31945348	9.10939600	2.91002825		63.00000000	0.54507937	4.96534379	1.327211
64	0.32924625	9.11415580	3.00080162		64.00000000	0.53656250	4.89031422	1.348587
65	0.33938882	9.11133670	3.09228581		65.00000000	0.52830769	4.81358927	1.370061
66	0.34924263	9.10077290	3.17837786		66.00000000	0.52030303	4.73515972	1.391426
67	0.35936880	9.12310890	3.27856070		67.00000000	0.51253731	4.67593373	1.412811
68	0.36955157	9.10803890	3.36589008		68.00000000	0.50500000	4.59955964	1.434159
69	0.37936294	9.10831640	3.45535769		69.00000000	0.49768116	4.53303747	1.455639
70	0.38950402	9.11265370	3.54941525		70.00000000	0.49057143	4.47040754	1.477034
71	0.39932209	9.11316390	3.63908766		71.00000000	0.48366197	4.40769082	1.498414
72	0.40946093	9.10830310	3.72949426		72.00000000	0.47694444	4.34415456	1.519896
73	0.41930506	9.10566620	3.81805191		73.00000000	0.47041096	4.28340517	1.541278
74	0.42945731	9.09594820	3.90632145		74.00000000	0.46405405	4.22101164	1.562633
75	0.43926197	9.09785750	3.99634281		75.00000000	0.45786667	4.16560569	1.584009
76	0.44940975	9.09619520	4.08791881		76.00000000	0.45184211	4.11004399	1.605492
77	0.45956644	9.09025860	4.17757778		77.00000000	0.44597403	4.05401922	1.626874
78	0.46944779	9.09226130	4.26834197		78.00000000	0.44025641	4.00292632	1.648271
79	0.47957027	9.08365350	4.35625016		79.00000000	0.43468354	3.94851470	1.669646
80	0.48940918	9.06335640	4.43568982		80.00000000	0.42925000	3.89044573	1.691129
81	0.49951452	9.05777740	4.52449133		81.00000000	0.42395062	3.84005032	1.712509
82	0.50934452	9.04746820	4.60827835		82.00000000	0.41878049	3.78890315	1.733850
83	0.51946402	9.01470280	4.68281376		83.00000000	0.41373494	3.72969752	1.755226
84	0.52925378	8.99643040	4.76139480		84.00000000	0.40880952	3.67782643	1.776702
85	0.53937328	8.92910390	4.81612006		85.00000000	0.40400000	3.60735798	1.798071
86	0.54956347	8.86509900	4.87193457		86.00000000	0.39930233	3.53985465	1.819421
87	0.55937856	8.78246500	4.91272262		87.00000000	0.39471264	3.46654998	1.840802
88	0.56949657	8.65112500	4.92678601		88.00000000	0.39022727	3.37590491	1.862286
89	0.57932806	8.45431610	4.89782254		89.00000000	0.38584270	3.26203612	1.883659
90	0.58941853	8.21104240	4.83974054		90.00000000	0.38155556	3.13296884	1.905009
91	0.59922838	7.87330720	4.71790912		91.00000000	0.37736264	2.97109197	1.926377
92	0.60934567	7.41184430	4.51637523		92.00000000	0.37326087	2.76655145	1.947856
93	0.61916226	6.79588080	4.20775291		93.00000000	0.36924731	2.50936072	1.969240
94	0.62928176	5.98786120	3.76805183		94.00000000	0.36531915	2.18748036	1.990714
95	0.63938636	4.93832450	3.15749733		95.00000000	0.36147368	1.78507435	2.012108
96	0.64916646	3.67338900	2.38464093		96.00000000	0.35770833	1.31400186	2.033601
97	0.65925026	2.01612640	1.32913185		97.00000000	0.35402062	0.71375032	2.055027
98	0.66898423	0.10574383	0.07074095		98.00000000	0.35040816	0.03705350	2.076426
99	0.67909777	-2.27586700	-1.54553620		99.00000000	0.34686869	-0.78942700	2.097787
100	0.68880272	-4.97522350	-3.42694748		100.00000000	0.34340000	-1.70849175	2.119267
101	0.69900554	-8.27126030	-5.78165677		101.00000000	0.34000000	-2.81222850	2.140655
01:49 04/04/2018
Test Lot:	JK-PERC
Recipe:	Recipe_YJX-LID
Cell Name:	3-6-2.5h
Test Order:	4
Test Condition:	Light
1	-0.29993525	9.11016750	-2.73246037		1.00000000	34.34000000	312.84315195	0.000000
2	-0.29011387	9.12484170	-2.64724314		2.00000000	17.17000000	156.67353199	0.061796
3	-0.28000146	9.10239700	-2.54868445		3.00000000	11.44666667	104.19210433	0.083216
4	-0.27016965	9.12107660	-2.46423807		4.00000000	8.58500000	78.30444261	0.104708
5	-0.26000142	9.11029050	-2.36868847		5.00000000	6.86800000	62.56947515	0.126083
6	-0.24988158	9.11322310	-2.27722659		6.00000000	5.72333333	52.15801354	0.147488
7	-0.24005349	9.11877540	-2.18899386		7.00000000	4.90571429	44.73410675	0.168900
8	-0.22991131	9.10636040	-2.09365525		8.00000000	4.29250000	39.08905202	0.190429
9	-0.22006685	9.11659910	-2.00626125		9.00000000	3.81555556	34.78489034	0.211815
10	-0.20992467	9.09798240	-1.90989095		10.00000000	3.43400000	31.24247156	0.233178
11	-0.20010550	9.11254220	-1.82346981		11.00000000	3.12181818	28.44769992	0.254553
12	-0.18995515	9.11556630	-1.73154876		12.00000000	2.86166667	26.08571223	0.276023
13	-0.18020147	9.11244680	-1.64207631		13.00000000	2.64153846	24.07087870	0.297423
14	-0.17001018	9.11434080	-1.54953072		14.00000000	2.45285714	22.35617593	0.318768
15	-0.16025352	9.10641570	-1.45933517		15.00000000	2.28933333	20.84762101	0.340148
16	-0.15002279	9.11465450	-1.36740590		16.00000000	2.14625000	19.56232722	0.361633
17	-0.13990889	9.10486220	-1.27385116		17.00000000	2.02000000	18.39182164	0.383007
18	-0.13010462	9.11144260	-1.18544078		18.00000000	1.90777778	17.38260772	0.404376
19	-0.11991034	9.10973360	-1.09235125		19.00000000	1.80736842	16.46464483	0.425754
20	-0.11008745	9.11135860	-1.00304623		20.00000000	1.71700000	15.64420272	0.447229
21	-0.09990137	9.10975360	-0.91007687		21.00000000	1.63523810	14.89661612	0.468620
22	-0.09012314	9.09802250	-0.81994235		22.00000000	1.56090909	14.20118603	0.490012
23	-0.07995566	9.11886020	-0.72910449		23.00000000	1.49304348	13.61485475	0.511354
24	-0.07014320	9.11197470	-0.63914306		24.00000000	1.43083333	13.03771713	0.532826
25	-0.06004047	9.11483670	-0.54725908		25.00000000	1.37360000	12.52013969	0.554201
26	-0.04986480	9.10439490	-0.45398882		26.00000000	1.32076923	12.02480465	0.575625
27	-0.04003447	9.11310770	-0.36483846		27.00000000	1.27185185	11.59052290	0.597039
28	-0.02989155	9.10540290	-0.27217464		28.00000000	1.22642857	11.16712627	0.618499
29	-0.02005230	9.11456490	-0.18276796		29.00000000	1.18413793	10.79290202	0.639889
30	-0.00992649	9.10398580	-0.09037066		30.00000000	1.14466667	10.42102908	0.661267
31	-0.00066851	9.12449930	-0.00609984		31.00000000	1.10774194	10.10759051	0.682745
32	0.00947718	9.10333820	0.08627395		32.00000000	1.07312500	9.76901981	0.704228
33	0.01929160	9.11693100	0.17588014		33.00000000	1.04060606	9.48713365	0.725613
34	0.02944018	9.10782720	0.26813606		34.00000000	1.01000000	9.19890547	0.746977
35	0.03923152	9.10422130	0.35717248		35.00000000	0.98114286	8.93254170	0.768346
36	0.04940318	9.12376690	0.45074313		36.00000000	0.95388889	8.70305987	0.789827
37	0.05922727	9.10807130	0.53944623		37.00000000	0.92810811	8.45327482	0.811205
38	0.06935056	9.11573980	0.63218162		38.00000000	0.90368421	8.23775012	0.832594
39	0.07951774	9.10505200	0.72401319		39.00000000	0.88051282	8.01711502	0.853935
40	0.08933812	9.11404040	0.81423120		40.00000000	0.85850000	7.82440368	0.875410
41	0.09950233	9.10267540	0.90573744		41.00000000	0.83756098	7.62404569	0.896808
42	0.10931005	9.11017700	0.99583390		42.00000000	0.81761905	7.44865424	0.918195
43	0.11945193	9.11126710	1.08835844		43.00000000	0.79860465	7.27630028	0.939679
44	0.12928347	9.11619000	1.17857268		44.00000000	0.78045455	7.11477192	0.961058
45	0.13944098	9.10378550	1.26944077		45.00000000	0.76311111	6.94719987	0.982394
46	0.14924349	9.11233040	1.35995599		46.00000000	0.74652174	6.80255274	1.003773
47	0.15938315	9.11026380	1.45202254		47.00000000	0.73063830	6.65630764	1.025259
48	0.16955480	9.11332800	1.54520851		48.00000000	0.71541667	6.51982674	1.046633
49	0.17933498	9.11677740	1.63495709		49.00000000	0.70081633	6.38918645	1.067992
50	0.18951111	9.10725310	1.72592564		50.00000000	0.68680000	6.25486143	1.089364
51	0.19929129	9.12086960	1.81770987		51.00000000	0.67333333	6.14138553	1.110841
52	0.20941979	9.09936430	1.90558696		52.00000000	0.66038462	6.00908019	1.132221
53	0.21924238	9.10919570	1.99712175		53.00000000	0.64792453	5.90207133	1.153567
54	0.22942670	9.11045930	2.09018261		54.00000000	0.63592593	5.79357727	1.174943
55	0.23922995	9.10837650	2.17899645		55.00000000	0.62436364	5.68693907	1.196426
56	0.24938895	9.10636710	2.27102733		56.00000000	0.61321429	5.58415440	1.217803
57	0.25953904	9.10774040	2.36381420		57.00000000	0.60245614	5.48701413	1.239158
58	0.26936162	9.10713010	2.45311132		58.00000000	0.59206897	5.39204910	1.260528
59	0.27950054	9.10657880	2.54529369		59.00000000	0.58203390	5.30033756	1.282007
60	0.28931868	9.11265750	2.63646204		60.00000000	0.57233333	5.21547764	1.303401
61	0.29947397	9.10577960	2.72694397		61.00000000	0.56295082	5.12610609	1.324746
62	0.30931517	9.10536580	2.81642777		62.00000000	0.55387097	5.04319777	1.346120
63	0.31946376	9.10510250	2.90875028		63.00000000	0.54507937	4.96300349	1.367583
64	0.32928115	9.10650250	2.99859962		64.00000000	0.53656250	4.88620775	1.388969
65	0.33939922	9.11301610	3.09295056		65.00000000	0.52830769	4.81447651	1.410338
66	0.34925160	9.10204320	3.17890315		66.00000000	0.52030303	4.73582066	1.431708
67	0.35940763	9.11828800	3.27718228		67.00000000	0.51253731	4.67346283	1.453194
68	0.36952421	9.09549810	3.36100675		68.00000000	0.50500000	4.59322654	1.474568
69	0.37933788	9.11122700	3.45623353		69.00000000	0.49768116	4.53448602	1.495966
70	0.38950878	9.08895590	3.54022812		70.00000000	0.49057143	4.45878208	1.517298
71	0.39930683	9.11805920	3.64090331		71.00000000	0.48366197	4.41005849	1.538766
72	0.40945020	9.08108040	3.71825019		72.00000000	0.47694444	4.33117085	1.560129
73	0.41929811	9.10825440	3.81907386		73.00000000	0.47041096	4.28462269	1.581493
74	0.42945638	9.08751580	3.90269164		74.00000000	0.46405405	4.21709855	1.602985
75	0.43927452	9.10295300	3.99869531		75.00000000	0.45786667	4.16793875	1.624360
76	0.44938067	9.09467320	4.08697034		76.00000000	0.45184211	4.10935629	1.645697
77	0.45951885	9.07943820	4.17217300		77.00000000	0.44597403	4.04919361	1.667084
78	0.46939951	9.09490200	4.26914254		78.00000000	0.44025641	4.00408891	1.688565
79	0.47955328	9.06733890	4.34827211		79.00000000	0.43468354	3.94142301	1.709945
80	0.48934093	9.08681960	4.44655275		80.00000000	0.42925000	3.90051731	1.731301
81	0.49949619	9.03700830	4.51395121		81.00000000	0.42395062	3.83124525	1.752674
82	0.50929129	9.03044800	4.59912851		82.00000000	0.41878049	3.78177542	1.774139
83	0.51944727	9.02686880	4.68898235		83.00000000	0.41373494	3.73473102	1.795523
84	0.52921855	8.98353960	4.75425580		84.00000000	0.40880952	3.67255655	1.816875
85	0.53937906	8.92978480	4.81653893		85.00000000	0.40400000	3.60763306	1.838248
86	0.54951942	8.87023070	4.87436403		86.00000000	0.39930233	3.54190375	1.859723
87	0.55935544	8.77906990	4.91062051		87.00000000	0.39471264	3.46520989	1.881104
88	0.56948990	8.64190010	4.92147482		88.00000000	0.39022727	3.37230511	1.902475
89	0.57927155	8.46139430	4.90144499		89.00000000	0.38584270	3.26476719	1.923855
90	0.58944541	8.20915320	4.83884767		90.00000000	0.38155556	3.13224801	1.945324
91	0.59920031	7.87588550	4.71923303		91.00000000	0.37736264	2.97206492	1.966709
92	0.60931021	7.40215490	4.51020856		92.00000000	0.37326087	2.76293477	1.988176
93	0.61913502	6.80021620	4.21025199		93.00000000	0.36924731	2.51096155	2.009579
94	0.62924123	5.97478720	3.75958245		94.00000000	0.36531915	2.18270417	2.031066
95	0.63935930	4.94841530	3.16381534		95.00000000	0.36147368	1.78872191	2.052447
96	0.64917296	3.64882180	2.36871645		96.00000000	0.35770833	1.30521396	2.073810
97	0.65925455	2.02211790	1.33309043		97.00000000	0.35402062	0.71587143	2.095173
98	0.66897815	0.10144769	0.06786629		98.00000000	0.35040816	0.03554810	2.116658
99	0.67910445	-2.26116800	-1.53556925		99.00000000	0.34686869	-0.78432837	2.138062
100	0.68882954	-4.96336170	-3.41891016		100.00000000	0.34340000	-1.70441841	2.159480
101	0.69901681	-8.23129750	-5.75381532		101.00000000	0.34000000	-2.79864115	2.180840
