# Supplementary material for: Study on the Electrical Injection Regeneration of Industrialized B-Doped Czochralski Silicon PERC Solar Cells
Source: Hindawi journal article supplement (doi:10.1155/2019/5357370), 2019-06-20
Supplement: f1 [file 5357370.f1.zip › section3.3/IVRawData_3-6-2h.csv]

01:17 04/04/2018
Test Lot:	JK-PERC
Recipe:	Recipe_YJX-LID
Cell Name:	3-6-2h
Test Order:	2
Test Condition:	Light
1	-0.29992110	9.11906430	-2.73499980		1.00000000	34.34000000	313.14866806	0.000000
2	-0.29012966	9.10827830	-2.64258169		2.00000000	17.17000000	156.38913841	0.061779
3	-0.27997798	9.10628030	-2.54955796		3.00000000	11.44666667	104.23655517	0.083212
4	-0.27015153	9.11702160	-2.46297733		4.00000000	8.58500000	78.26963044	0.104564
5	-0.26000583	9.10843850	-2.36824711		5.00000000	6.86800000	62.55675562	0.126038
6	-0.24980800	9.09552960	-2.27213606		6.00000000	5.72333333	52.05674774	0.147424
7	-0.24002101	9.10360340	-2.18505608		7.00000000	4.90571429	44.65967725	0.168814
8	-0.22987157	9.11658570	-2.09564387		8.00000000	4.29250000	39.13294412	0.190225
9	-0.22006895	9.11119170	-2.00509039		9.00000000	3.81555556	34.76425811	0.211699
10	-0.20992322	9.10953810	-1.91230357		10.00000000	3.43400000	31.28215384	0.233132
11	-0.20006032	9.11976810	-1.82450372		11.00000000	3.12181818	28.47025787	0.254541
12	-0.18991832	9.10251520	-1.72873439		12.00000000	2.86166667	26.04836433	0.275920
13	-0.18014026	9.11383340	-1.64176832		13.00000000	2.64153846	24.07454146	0.297447
14	-0.16998561	9.10783100	-1.54820021		14.00000000	2.45285714	22.34020832	0.318853
15	-0.16013759	9.11469650	-1.45960553		15.00000000	2.28933333	20.86657852	0.340239
16	-0.15001643	9.11201950	-1.36695264		16.00000000	2.14625000	19.55667185	0.361602
17	-0.13988410	9.11703300	-1.27532796		17.00000000	2.02000000	18.41640666	0.383080
18	-0.13006213	9.10785390	-1.18458688		18.00000000	1.90777778	17.37576127	0.404450
19	-0.11991418	9.11292740	-1.09276922		19.00000000	1.80736842	16.47041721	0.425832
20	-0.11006691	9.10505390	-1.00216515		20.00000000	1.71700000	15.63337755	0.447195
21	-0.09991672	9.11042790	-0.91028406		21.00000000	1.63523810	14.89771877	0.468674
22	-0.09009103	9.10185620	-0.81999557		22.00000000	1.56090909	14.20717009	0.490052
23	-0.07993563	9.10500050	-0.72781398		23.00000000	1.49304348	13.59416162	0.511446
24	-0.07013302	9.10711290	-0.63870929		24.00000000	1.43083333	13.03076071	0.532921
25	-0.05998432	9.10521220	-0.54616992		25.00000000	1.37360000	12.50691948	0.554299
26	-0.04980064	9.10615540	-0.45349235		26.00000000	1.32076923	12.02712986	0.575665
27	-0.04001142	9.10551450	-0.36432454		27.00000000	1.27185185	11.58086548	0.597046
28	-0.02987016	9.10984710	-0.27211259		28.00000000	1.22642857	11.17257676	0.618528
29	-0.02002214	9.11331270	-0.18246803		29.00000000	1.18413793	10.79141925	0.639919
30	-0.00992182	9.11465640	-0.09043397		30.00000000	1.14466667	10.43324336	0.661273
31	-0.00062232	9.10101510	-0.00566373		31.00000000	1.10774194	10.08157608	0.682771
32	0.00950533	9.11791420	0.08666881		32.00000000	1.07312500	9.78466168	0.704268
33	0.01931586	9.10487370	0.17586846		33.00000000	1.04060606	9.47458675	0.725652
34	0.02945757	9.10995860	0.26835725		34.00000000	1.01000000	9.20105819	0.747008
35	0.03928001	9.11315250	0.35796468		35.00000000	0.98114286	8.94130448	0.768392
36	0.04939046	9.11647220	0.45026674		36.00000000	0.95388889	8.69610154	0.789875
37	0.05921885	9.10566140	0.53922676		37.00000000	0.92810811	8.45103818	0.811268
38	0.06939107	9.11940480	0.63280528		38.00000000	0.90368421	8.24106213	0.832626
39	0.07954618	9.11305900	0.72490900		39.00000000	0.88051282	8.02416528	0.853997
40	0.08938275	9.10327820	0.81367607		40.00000000	0.85850000	7.81516433	0.875490
41	0.09949767	9.10406210	0.90583295		41.00000000	0.83756098	7.62520713	0.896871
42	0.10934466	9.10723020	0.99582699		42.00000000	0.81761905	7.44624488	0.918219
43	0.11945214	9.10107140	1.08714246		43.00000000	0.79860465	7.26815795	0.939610
44	0.12929021	9.11075120	1.17793094		44.00000000	0.78045455	7.11052719	0.961093
45	0.13947210	9.09749510	1.26884675		45.00000000	0.76311111	6.94239959	0.982484
46	0.14929081	9.11570930	1.36089163		46.00000000	0.74652174	6.80507516	1.003850
47	0.15941392	9.11259840	1.45267503		47.00000000	0.73063830	6.65801338	1.025216
48	0.16957870	9.10982990	1.54483311		48.00000000	0.71541667	6.51732414	1.046684
49	0.17941305	9.10846520	1.63417752		49.00000000	0.70081633	6.38336112	1.068066
50	0.18951233	9.10060600	1.72467705		50.00000000	0.68680000	6.25029620	1.089451
51	0.19931988	9.12232880	1.81826148		51.00000000	0.67333333	6.14236806	1.110799
52	0.20946309	9.09891220	1.90588627		52.00000000	0.66038462	6.00878163	1.132282
53	0.21930933	9.12148570	2.00042692		53.00000000	0.64792453	5.91003432	1.153651
54	0.22944583	9.10809420	2.08981423		54.00000000	0.63592593	5.79207324	1.175041
55	0.23927124	9.09902570	2.17713516		55.00000000	0.62436364	5.68110077	1.196535
56	0.24942635	9.10588650	2.27124803		56.00000000	0.61321429	5.58385969	1.217903
57	0.25956360	9.10340790	2.36291333		57.00000000	0.60245614	5.48440399	1.239283
58	0.26938900	9.09891510	2.45114764		58.00000000	0.59206897	5.38718525	1.260668
59	0.27954784	9.10786720	2.54608460		59.00000000	0.58203390	5.30108745	1.282151
60	0.28934571	9.11409760	2.63712504		60.00000000	0.57233333	5.21630186	1.303526
61	0.29951569	9.10510060	2.72712049		61.00000000	0.56295082	5.12572385	1.324881
62	0.30931580	9.10283760	2.81565149		62.00000000	0.55387097	5.04179747	1.346272
63	0.31943741	9.11069490	2.91029678		63.00000000	0.54507937	4.96605179	1.367763
64	0.32925689	9.10748860	2.99870337		64.00000000	0.53656250	4.88673685	1.389146
65	0.33939114	9.10323810	3.08955836		65.00000000	0.52830769	4.80931071	1.410500
66	0.34926122	9.11147400	3.18228453		66.00000000	0.52030303	4.74072753	1.431868
67	0.35939103	9.10108850	3.27084957		67.00000000	0.51253731	4.66464745	1.453349
68	0.36953199	9.09854790	3.36220451		68.00000000	0.50500000	4.59476669	1.474747
69	0.37936857	9.11530880	3.45806166		69.00000000	0.49768116	4.53651745	1.496099
70	0.38949540	9.08726120	3.53944644		70.00000000	0.49057143	4.45795071	1.517475
71	0.39931187	9.11084460	3.63806839		71.00000000	0.48366197	4.40656906	1.538966
72	0.40948334	9.09825800	3.72558507		72.00000000	0.47694444	4.33936361	1.560343
73	0.41927305	9.09032060	3.81132644		73.00000000	0.47041096	4.27618643	1.581712
74	0.42946535	9.10567280	3.91057096		74.00000000	0.46405405	4.22552438	1.603091
75	0.43926248	9.07503320	3.98632159		75.00000000	0.45786667	4.15515520	1.624580
76	0.44943321	9.10469340	4.09195158		76.00000000	0.45184211	4.11388383	1.645964
77	0.45954889	9.08200930	4.17362729		77.00000000	0.44597403	4.05034025	1.667366
78	0.46942267	9.08454420	4.26449099		78.00000000	0.44025641	3.99952882	1.688743
79	0.47959489	9.07426260	4.35196997		79.00000000	0.43468354	3.94443263	1.710223
80	0.48936078	9.07739640	4.44212178		80.00000000	0.42925000	3.89647240	1.731609
81	0.49954861	9.06949900	4.53065562		81.00000000	0.42395062	3.84501970	1.752998
82	0.50935763	9.04289340	4.60606675		82.00000000	0.41878049	3.78698731	1.774369
83	0.51946515	9.02480410	4.68807122		83.00000000	0.41373494	3.73387678	1.795856
84	0.52928382	8.99061870	4.75858901		84.00000000	0.40880952	3.67545055	1.817233
85	0.53941512	8.94526480	4.82521109		85.00000000	0.40400000	3.61388698	1.838626
86	0.54953003	8.87151430	4.87516352		86.00000000	0.39930233	3.54241629	1.860104
87	0.55935025	8.77898310	4.91052639		87.00000000	0.39471264	3.46517563	1.881534
88	0.56950390	8.65361880	4.92826966		88.00000000	0.39022727	3.37687806	1.902889
89	0.57930624	8.47447870	4.90931839		89.00000000	0.38584270	3.26981571	1.924272
90	0.58943307	8.21256070	4.84075487		90.00000000	0.38155556	3.13354816	1.945746
91	0.59924132	7.89115760	4.72870770		91.00000000	0.37736264	2.97782804	1.967131
92	0.60935849	7.42490860	4.52443109		92.00000000	0.37326087	2.77142784	1.988592
93	0.61916381	6.82650900	4.22672732		93.00000000	0.36924731	2.52067010	2.010006
94	0.62927800	6.02545020	3.79168325		94.00000000	0.36531915	2.20121234	2.031500
95	0.63938397	4.97292040	3.17960559		95.00000000	0.36147368	1.79757986	2.052880
96	0.64917666	3.69922800	2.40145248		96.00000000	0.35770833	1.32324468	2.074262
97	0.65928113	2.05815200	1.35690078		97.00000000	0.35402062	0.72862824	2.095639
98	0.66899043	0.12228997	0.08181082		98.00000000	0.35040816	0.04285140	2.117114
99	0.67909420	-2.26060250	-1.53516205		99.00000000	0.34686869	-0.78413222	2.138497
100	0.68879902	-4.99331330	-3.43938931		100.00000000	0.34340000	-1.71470379	2.159844
101	0.69901890	-8.30413530	-5.80474752		101.00000000	0.34000000	-2.82340600	2.181217
01:17 04/04/2018
Test Lot:	JK-PERC
Recipe:	Recipe_YJX-LID
Cell Name:	3-6-2h
Test Order:	3
Test Condition:	Light
1	-0.29992855	9.10431580	-2.73064424		1.00000000	34.34000000	312.64220457	0.000000
2	-0.29006565	9.11186790	-2.64303989		2.00000000	17.17000000	156.45077184	0.021591
3	-0.27993110	9.10627840	-2.54913053		3.00000000	11.44666667	104.23653342	0.042982
4	-0.27011061	9.11796950	-2.46286030		4.00000000	8.58500000	78.27776816	0.064324
5	-0.25998050	9.09902190	-2.36556826		5.00000000	6.86800000	62.49208241	0.085705
6	-0.24983107	9.11514850	-2.27724730		6.00000000	5.72333333	52.16903325	0.107197
7	-0.24003291	9.10492040	-2.18548054		7.00000000	4.90571429	44.66613808	0.128647
8	-0.22987306	9.09478000	-2.09064491		8.00000000	4.29250000	39.03934315	0.150002
9	-0.22006820	9.11174960	-2.00520633		9.00000000	3.81555556	34.76638681	0.171375
10	-0.20990759	9.09987830	-1.91013352		10.00000000	3.43400000	31.24898208	0.192852
11	-0.20007744	9.10809140	-1.82232361		11.00000000	3.12181818	28.43380533	0.214248
12	-0.18991013	9.11796570	-1.73159405		12.00000000	2.86166667	26.09257851	0.235584
13	-0.18012241	9.10010720	-1.63913324		13.00000000	2.64153846	24.03828317	0.256955
14	-0.16997966	9.10246850	-1.54723450		14.00000000	2.45285714	22.32705488	0.278440
15	-0.16016886	9.10439300	-1.45824025		15.00000000	2.28933333	20.84299037	0.299810
16	-0.15005960	9.11725810	-1.36813210		16.00000000	2.14625000	19.56791520	0.321210
17	-0.13991685	9.11559580	-1.27542545		17.00000000	2.02000000	18.41350352	0.342577
18	-0.13006586	9.10170080	-1.18382054		18.00000000	1.90777778	17.36402253	0.364058
19	-0.11993726	9.11096670	-1.09274438		19.00000000	1.80736842	16.46687350	0.385448
20	-0.11009593	9.10949990	-1.00291886		20.00000000	1.71700000	15.64101133	0.406864
21	-0.09996287	9.10495190	-0.91015710		21.00000000	1.63523810	14.88876420	0.428208
22	-0.09012304	9.11073780	-0.82108734		22.00000000	1.56090909	14.22103346	0.449695
23	-0.07997657	9.09992030	-0.72778038		23.00000000	1.49304348	13.58657666	0.471075
24	-0.07017246	9.11424060	-0.63956867		24.00000000	1.43083333	13.04095926	0.492466
25	-0.06000813	9.11012080	-0.54668132		25.00000000	1.37360000	12.51366193	0.513935
26	-0.04985199	9.10698320	-0.45400124		26.00000000	1.32076923	12.02822320	0.535373
27	-0.04004863	9.09911920	-0.36440725		27.00000000	1.27185185	11.57273160	0.556748
28	-0.02991109	9.11461160	-0.27262800		28.00000000	1.22642857	11.17842008	0.578125
29	-0.02007722	9.11556240	-0.18301512		29.00000000	1.18413793	10.79408320	0.599469
30	-0.00992554	9.10871890	-0.09040896		30.00000000	1.14466667	10.42644690	0.620969
31	-0.00065060	9.09896180	-0.00591979		31.00000000	1.10774194	10.07930156	0.642452
32	0.00950980	9.10112190	0.08654983		32.00000000	1.07312500	9.76664144	0.663847
33	0.01930767	9.10394190	0.17577593		33.00000000	1.04060606	9.47361712	0.685210
34	0.02947451	9.11121460	0.26854862		34.00000000	1.01000000	9.20232675	0.706683
35	0.03934181	9.10639950	0.35826221		35.00000000	0.98114286	8.93467882	0.768290
36	0.04946810	9.11121940	0.45071471		36.00000000	0.95388889	8.69109095	0.789765
37	0.05928181	9.09838580	0.53936875		37.00000000	0.92810811	8.44428563	0.811140
38	0.06942374	9.11829190	0.63302588		38.00000000	0.90368421	8.24005642	0.832507
39	0.07956268	9.11183170	0.72496174		39.00000000	0.88051282	8.02308463	0.853879
40	0.08939722	9.11647610	0.81498764		40.00000000	0.85850000	7.82649473	0.875353
41	0.09953692	9.11084560	0.90686549		41.00000000	0.83756098	7.63088873	0.896725
42	0.10936551	9.09829040	0.99503917		42.00000000	0.81761905	7.43893553	0.918117
43	0.11952678	9.11108780	1.08901899		43.00000000	0.79860465	7.27615709	0.939630
44	0.12933305	9.11237910	1.17853178		44.00000000	0.78045455	7.11179769	0.961017
45	0.13947943	9.10503960	1.26996573		45.00000000	0.76311111	6.94815689	0.982379
46	0.14928272	9.10416700	1.35909481		46.00000000	0.74652174	6.79645858	1.003753
47	0.15945591	9.10108280	1.45122144		47.00000000	0.73063830	6.64959965	1.025229
48	0.16957773	9.10643770	1.54424903		48.00000000	0.71541667	6.51489730	1.046617
49	0.17941600	9.11319830	1.63505359		49.00000000	0.70081633	6.38667816	1.067970
50	0.18954229	9.10601430	1.72597480		50.00000000	0.68680000	6.25401062	1.089343
51	0.19933814	9.10914990	1.81580100		51.00000000	0.67333333	6.13349427	1.110819
52	0.20947486	9.10548690	1.90737059		52.00000000	0.66038462	6.01312346	1.132195
53	0.21929228	9.09914300	1.99537181		53.00000000	0.64792453	5.89555794	1.153546
54	0.22945058	9.11216550	2.09079166		54.00000000	0.63592593	5.79466228	1.174920
55	0.23925164	9.10069560	2.17735635		55.00000000	0.62436364	5.68214340	1.196389
56	0.24939579	9.10633280	2.27108106		56.00000000	0.61321429	5.58413336	1.217783
57	0.25956526	9.10335060	2.36291357		57.00000000	0.60245614	5.48436947	1.239125
58	0.26940724	9.09442520	2.45010399		58.00000000	0.59206897	5.38452692	1.260489
59	0.27955139	9.13168810	2.55277610		59.00000000	0.58203390	5.31495202	1.281964
60	0.28939041	9.09858230	2.63304246		60.00000000	0.57233333	5.20742194	1.303335
61	0.29948694	9.09956070	2.72519959		61.00000000	0.56295082	5.12260515	1.324682
62	0.30934158	9.10373590	2.81616405		62.00000000	0.55387097	5.04229501	1.346061
63	0.31950361	9.10727210	2.90980631		63.00000000	0.54507937	4.96418609	1.367534
64	0.32932252	9.11252590	3.00095999		64.00000000	0.53656250	4.88943968	1.388909
65	0.33946070	9.11064720	3.09270668		65.00000000	0.52830769	4.81322500	1.410281
66	0.34928930	9.08909990	3.17472534		66.00000000	0.52030303	4.72908622	1.431633
67	0.35942975	9.12095550	3.27834276		67.00000000	0.51253731	4.67483003	1.453102
68	0.36958283	9.10238740	3.36408610		68.00000000	0.50500000	4.59670564	1.474488
69	0.37940100	9.09607410	3.45105961		69.00000000	0.49768116	4.52694470	1.495862
70	0.38956973	9.10301490	3.54625906		70.00000000	0.49057143	4.46567902	1.517238
71	0.39939979	9.10878090	3.63804518		71.00000000	0.48366197	4.40557093	1.538706
72	0.40953055	9.10085580	3.72707848		72.00000000	0.47694444	4.34060261	1.560080
73	0.41934204	9.09959220	3.81584156		73.00000000	0.47041096	4.28054789	1.581466
74	0.42947873	9.10275650	3.90944030		74.00000000	0.46405405	4.22417106	1.602939
75	0.43932223	9.09527970	3.99575856		75.00000000	0.45786667	4.16442540	1.624314
76	0.44947010	9.08993430	4.08565368		76.00000000	0.45184211	4.10721505	1.645680
77	0.45958969	9.09370420	4.17937269		77.00000000	0.44597403	4.05555587	1.667057
78	0.46947113	9.08234980	4.26390102		78.00000000	0.44025641	3.99856272	1.688580
79	0.47958553	9.06689740	4.34835280		79.00000000	0.43468354	3.94123110	1.709970
80	0.48942453	9.08018490	4.44406523		80.00000000	0.42925000	3.89766937	1.731351
81	0.49953744	9.05970950	4.52566409		81.00000000	0.42395062	3.84086943	1.752740
82	0.50933921	9.04749300	4.60824294		82.00000000	0.41878049	3.78891353	1.774229
83	0.51951611	9.01637740	4.68415331		83.00000000	0.41373494	3.73039036	1.795608
84	0.52930826	8.99231530	4.75970676		84.00000000	0.40880952	3.67614414	1.816970
85	0.53942639	8.93532180	4.81994838		85.00000000	0.40400000	3.60987001	1.838353
86	0.54955637	8.87351610	4.87649730		86.00000000	0.39930233	3.54321561	1.859834
87	0.55938494	8.77110100	4.90642181		87.00000000	0.39471264	3.46206446	1.881226
88	0.56952095	8.64827160	4.92537186		88.00000000	0.39022727	3.37479144	1.902575
89	0.57932723	8.46670630	4.90499351		89.00000000	0.38584270	3.26681679	1.923959
90	0.58947432	8.20327760	4.83562149		90.00000000	0.38155556	3.13000614	1.945426
91	0.59926718	7.87678770	4.72030035		91.00000000	0.37736264	2.97240538	1.966816
92	0.60938901	7.39552500	4.50675166		92.00000000	0.37326087	2.76046009	1.988265
93	0.61917448	6.79360060	4.20642412		93.00000000	0.36924731	2.50851876	2.009674
94	0.62928438	5.97623210	3.76074951		94.00000000	0.36531915	2.18323202	2.031168
95	0.63942927	4.92086600	3.14654575		95.00000000	0.36147368	1.77876356	2.052550
96	0.64921170	3.65181450	2.37080070		96.00000000	0.35770833	1.30628448	2.073945
97	0.65928817	2.02083850	1.33231492		97.00000000	0.35402062	0.71541850	2.095311
98	0.66902745	0.09593353	0.06418217		98.00000000	0.35040816	0.03361589	2.116823
99	0.67913139	-2.25886340	-1.53406504		99.00000000	0.34686869	-0.78352898	2.138202
100	0.68884838	-4.94329070	-3.40517779		100.00000000	0.34340000	-1.69752603	2.159580
101	0.69906992	-8.19888970	-5.73159717		101.00000000	0.34000000	-2.78762250	2.180931
01:17 04/04/2018
Test Lot:	JK-PERC
Recipe:	Recipe_YJX-LID
Cell Name:	3-6-2h
Test Order:	4
Test Condition:	Light
1	-0.29988939	9.10849380	-2.73154065		1.00000000	34.34000000	312.78567709	0.000000
2	-0.29009628	9.11726860	-2.64488570		2.00000000	17.17000000	156.54350186	0.061759
3	-0.27994442	9.09711170	-2.54668566		3.00000000	11.44666667	104.13160526	0.083174
4	-0.27012151	9.11014270	-2.46084550		4.00000000	8.58500000	78.21057508	0.104661
5	-0.25994509	9.11721710	-2.36997582		5.00000000	6.86800000	62.61704704	0.126057
6	-0.24980068	9.09583850	-2.27214664		6.00000000	5.72333333	52.05851568	0.147403
7	-0.24000978	9.11881730	-2.18860533		7.00000000	4.90571429	44.73431230	0.168779
8	-0.22984378	9.10447980	-2.09260805		8.00000000	4.29250000	39.08097954	0.190270
9	-0.22003429	9.10821150	-2.00411885		9.00000000	3.81555556	34.75288699	0.211657
10	-0.20989583	9.11254880	-1.91268599		10.00000000	3.43400000	31.29249258	0.233054
11	-0.20007814	9.09653950	-1.82001870		11.00000000	3.12181818	28.39774240	0.254456
12	-0.18995084	9.11513420	-1.73142740		12.00000000	2.86166667	26.08447570	0.275953
13	-0.18016963	9.08881950	-1.63752925		13.00000000	2.64153846	24.00846628	0.297337
14	-0.17001778	9.11880870	-1.55035961		14.00000000	2.45285714	22.36713505	0.318701
15	-0.16021051	9.10878560	-1.45932319		15.00000000	2.28933333	20.85304650	0.340080
16	-0.15004674	9.10386940	-1.36600592		16.00000000	2.14625000	19.53917970	0.361555
17	-0.13986586	9.11570170	-1.27497546		17.00000000	2.02000000	18.41371743	0.382925
18	-0.13005190	9.09844880	-1.18327055		18.00000000	1.90777778	17.35781843	0.404263
19	-0.11993725	9.10708330	-1.09227853		19.00000000	1.80736842	16.45985476	0.425634
20	-0.11009128	9.10435300	-1.00230988		20.00000000	1.71700000	15.63217410	0.447116
21	-0.09993347	9.10620400	-0.91001455		21.00000000	1.63523810	14.89081168	0.468519
22	-0.09010834	9.10671330	-0.82059084		22.00000000	1.56090909	14.21475158	0.489875
23	-0.07999295	9.10648250	-0.72845440		23.00000000	1.49304348	13.59637431	0.511252
24	-0.07016187	9.10118390	-0.63855610		24.00000000	1.43083333	13.02227730	0.532720
25	-0.06000703	9.12133600	-0.54734430		25.00000000	1.37360000	12.52906713	0.554102
26	-0.04983731	9.10301490	-0.45366978		26.00000000	1.32076923	12.02298199	0.575475
27	-0.04000623	9.10801320	-0.36437725		27.00000000	1.27185185	11.58404346	0.596837
28	-0.02988042	9.10729410	-0.27212976		28.00000000	1.22642857	11.16944569	0.618316
29	-0.02003222	9.11194520	-0.18253250		29.00000000	1.18413793	10.78979994	0.639689
30	-0.00989748	9.10721870	-0.09013850		30.00000000	1.14466667	10.42472967	0.661074
31	-0.00066107	9.10243700	-0.00601737		31.00000000	1.10774194	10.08315118	0.682550
32	0.00949207	9.10866740	0.08646010		32.00000000	1.07312500	9.77473870	0.704025
33	0.01930129	9.09952830	0.17563260		33.00000000	1.04060606	9.46902430	0.725417
34	0.02946328	9.10068990	0.26813614		34.00000000	1.01000000	9.19169680	0.746803
35	0.03930152	9.09789470	0.35756107		35.00000000	0.98114286	8.92633440	0.768281
36	0.04942704	9.11694530	0.45062362		36.00000000	0.95388889	8.69655282	0.789659
37	0.05923998	9.08962060	0.53846891		37.00000000	0.92810811	8.43615058	0.811005
38	0.06937517	9.11421780	0.63230043		38.00000000	0.90368421	8.23637472	0.832380
39	0.07954535	9.10795310	0.72449531		39.00000000	0.88051282	8.01966947	0.853861
40	0.08936052	9.10643580	0.81375584		40.00000000	0.85850000	7.81787513	0.875239
41	0.09952177	9.11925130	0.90756404		41.00000000	0.83756098	7.63792902	0.896577
42	0.10933693	9.10274120	0.99526578		42.00000000	0.81761905	7.44257459	0.917960
43	0.11946395	9.09946820	1.08705841		43.00000000	0.79860465	7.26687763	0.939446
44	0.12927316	9.10522750	1.17706153		44.00000000	0.78045455	7.10621619	0.960819
45	0.13943367	9.10362240	1.26935148		45.00000000	0.76311111	6.94707540	0.982173
46	0.14925405	9.10441680	1.35887108		46.00000000	0.74652174	6.79664506	1.003551
47	0.15944134	9.11443810	1.45321822		47.00000000	0.73063830	6.65935754	1.025007
48	0.16957878	9.10068990	1.54328389		48.00000000	0.71541667	6.51078523	1.046380
49	0.17938724	9.11483570	1.63508522		49.00000000	0.70081633	6.38782567	1.067726
50	0.18952765	9.10711380	1.72604988		50.00000000	0.68680000	6.25476576	1.089106
51	0.19930337	9.09963700	1.81358832		51.00000000	0.67333333	6.12708891	1.110581
52	0.20945197	9.11271950	1.90867705		52.00000000	0.66038462	6.01789976	1.131947
53	0.21927607	9.10793970	1.99715322		53.00000000	0.64792453	5.90125753	1.153305
54	0.22941498	9.10326860	2.08842618		54.00000000	0.63592593	5.78900451	1.174677
55	0.23926514	9.11846830	2.18173159		55.00000000	0.62436364	5.69324003	1.196153
56	0.24940257	9.10022260	2.26961890		56.00000000	0.61321429	5.58038650	1.217539
57	0.25951320	9.11281110	2.36489477		57.00000000	0.60245614	5.49006900	1.238902
58	0.26933804	9.10233880	2.45160609		58.00000000	0.59206897	5.38921232	1.260272
59	0.27951345	9.10225390	2.54420239		59.00000000	0.58203390	5.29782032	1.281744
60	0.28934944	9.11245250	2.63668303		60.00000000	0.57233333	5.21536031	1.303162
61	0.29946977	9.10809140	2.72759804		61.00000000	0.56295082	5.12740752	1.324559
62	0.30929685	9.09649280	2.81351657		62.00000000	0.55387097	5.03828327	1.345900
63	0.31947744	9.10107710	2.90758881		63.00000000	0.54507937	4.96080933	1.367409
64	0.32925391	9.09813310	2.99559590		64.00000000	0.53656250	4.88171704	1.388795
65	0.33943972	9.11266900	3.09320181		65.00000000	0.52830769	4.81429313	1.410170
66	0.34924522	9.09476380	3.17630278		66.00000000	0.52030303	4.73203317	1.431648
67	0.35939902	9.09493260	3.26870986		67.00000000	0.51253731	4.66149232	1.453033
68	0.36956099	9.11024570	3.36679142		68.00000000	0.50500000	4.60067408	1.474388
69	0.37937766	9.10090070	3.45267841		69.00000000	0.49768116	4.52934681	1.495769
70	0.38952550	9.09131240	3.54129801		70.00000000	0.49057143	4.45993811	1.517244
71	0.39934441	9.09268090	3.63111129		71.00000000	0.48366197	4.39778397	1.538622
72	0.40948257	9.12623880	3.73703572		72.00000000	0.47694444	4.35270889	1.559961
73	0.41931784	9.08751110	3.81055553		73.00000000	0.47041096	4.27486481	1.581348
74	0.42947462	9.09632590	3.90664111		74.00000000	0.46405405	4.22118691	1.602827
75	0.43929350	9.11033920	4.00211279		75.00000000	0.45786667	4.17132064	1.624211
76	0.44940862	9.08241940	4.08171757		76.00000000	0.45184211	4.10381950	1.645556
77	0.45954901	9.09147260	4.17797723		77.00000000	0.44597403	4.05456064	1.666927
78	0.46941257	9.08105370	4.26276076		78.00000000	0.44025641	3.99799210	1.688403
79	0.47955820	9.07542990	4.35219683		79.00000000	0.43468354	3.94494004	1.709793
80	0.48936591	9.07128430	4.43917730		80.00000000	0.42925000	3.89384879	1.731149
81	0.49952567	9.05010130	4.52075792		81.00000000	0.42395062	3.83679603	1.752536
82	0.50932670	9.03957370	4.60409624		82.00000000	0.41878049	3.78559708	1.774013
83	0.51946634	9.01764490	4.68436299		83.00000000	0.41373494	3.73091477	1.795391
84	0.52924806	8.98072620	4.75303192		84.00000000	0.40880952	3.67140640	1.816746
85	0.53941005	8.93568610	4.81999889		85.00000000	0.40400000	3.61001718	1.838118
86	0.54954970	8.87115100	4.87513837		86.00000000	0.39930233	3.54227122	1.859594
87	0.55936635	8.77098270	4.90619258		87.00000000	0.39471264	3.46201777	1.880986
88	0.56948966	8.64958480	4.92584911		88.00000000	0.39022727	3.37530389	1.902356
89	0.57928175	8.46861840	4.90571609		89.00000000	0.38584270	3.26755456	1.923714
90	0.58943331	8.19759370	4.83193479		90.00000000	0.38155556	3.12783742	1.945185
91	0.59923881	7.86739210	4.71444668		91.00000000	0.37736264	2.96885983	1.966562
92	0.60936064	7.39544200	4.50649127		92.00000000	0.37326087	2.76042911	1.988040
93	0.61916608	6.78537270	4.20127262		93.00000000	0.36924731	2.50548063	2.009413
94	0.62926561	5.96913290	3.75617006		94.00000000	0.36531915	2.18063855	2.030899
95	0.63940001	4.91746470	3.14422698		95.00000000	0.36147368	1.77753408	2.052284
96	0.64919215	3.64105150	2.36374205		96.00000000	0.35770833	1.30243446	2.073675
97	0.65923208	2.00869250	1.32419453		97.00000000	0.35402062	0.71111856	2.095157
98	0.66900629	0.11185768	0.07483349		98.00000000	0.35040816	0.03919584	2.116543
99	0.67909980	-2.25230030	-1.52953668		99.00000000	0.34686869	-0.78125245	2.137895
100	0.68880409	-4.92890980	-3.39505323		100.00000000	0.34340000	-1.69258763	2.159267
101	0.69906878	-8.16777320	-5.70983525		101.00000000	0.34000000	-2.77704289	2.180747
