# Supplementary material for: Study on the Electrical Injection Regeneration of Industrialized B-Doped Czochralski Silicon PERC Solar Cells
Source: Hindawi journal article supplement (doi:10.1155/2019/5357370), 2019-06-20
Supplement: f1 [file 5357370.f1.zip › section3.3/IVRawData_3-6-3h.csv]

02:19 04/04/2018
Test Lot:	JK-PERC
Recipe:	Recipe_YJX-LID
Cell Name:	3-6-3h
Test Order:	2
Test Condition:	Light
1	-0.29990706	9.12092590	-2.73543007		1.00000000	34.34000000	313.21259541	0.000000
2	-0.29012531	9.12870790	-2.64846921		2.00000000	17.17000000	156.73991464	0.061808
3	-0.27997294	9.12628940	-2.55511407		3.00000000	11.44666667	104.46559267	0.083278
4	-0.27015847	9.13033200	-2.46663652		4.00000000	8.58500000	78.38390022	0.104794
5	-0.26001281	9.11599920	-2.37027657		5.00000000	6.86800000	62.60868251	0.126173
6	-0.24983065	9.11960890	-2.27835782		6.00000000	5.72333333	52.19456160	0.147524
7	-0.24001171	9.12864110	-2.19098076		7.00000000	4.90571429	44.78250505	0.168910
8	-0.22989953	9.11097720	-2.09460938		8.00000000	4.29250000	39.10886963	0.190396
9	-0.22008131	9.12297340	-2.00779594		9.00000000	3.81555556	34.80921184	0.211772
10	-0.20991778	9.12499810	-1.91549934		10.00000000	3.43400000	31.33524348	0.233120
11	-0.20008469	9.13681030	-1.82813586		11.00000000	3.12181818	28.52346052	0.254489
12	-0.18995836	9.11182210	-1.73086678		12.00000000	2.86166667	26.07499758	0.275957
13	-0.18014984	9.13022140	-1.64480792		13.00000000	2.64153846	24.11783099	0.297329
14	-0.17002650	9.10688880	-1.54841243		14.00000000	2.45285714	22.33789724	0.318663
15	-0.16021648	9.12324710	-1.46169454		15.00000000	2.28933333	20.88615369	0.340043
16	-0.15002838	9.12022780	-1.36829300		16.00000000	2.14625000	19.57428892	0.361531
17	-0.13989164	9.12248610	-1.27615954		17.00000000	2.02000000	18.42742192	0.382904
18	-0.13009875	9.12114430	-1.18664947		18.00000000	1.90777778	17.40111640	0.404255
19	-0.11993520	9.13490300	-1.09559642		19.00000000	1.80736842	16.51013521	0.425631
20	-0.11012147	9.12289330	-1.00462642		20.00000000	1.71700000	15.66400780	0.447102
21	-0.09994751	9.11854550	-0.91137587		21.00000000	1.63523810	14.91099297	0.468491
22	-0.09012335	9.11644940	-0.82160494		22.00000000	1.56090909	14.22994875	0.489829
23	-0.07997544	9.13292880	-0.73041001		23.00000000	1.49304348	13.63585978	0.511222
24	-0.07015501	9.12023640	-0.63983028		24.00000000	1.43083333	13.04953825	0.532706
25	-0.05999817	9.12062550	-0.54722084		25.00000000	1.37360000	12.52809119	0.554078
26	-0.04985249	9.12474920	-0.45489150		26.00000000	1.32076923	12.05168798	0.575462
27	-0.04002313	9.11880970	-0.36496330		27.00000000	1.27185185	11.59777500	0.596808
28	-0.02989160	9.12923050	-0.27288726		28.00000000	1.22642857	11.19634912	0.618277
29	-0.02006595	9.12571720	-0.18311617		29.00000000	1.18413793	10.80610788	0.639672
30	-0.00991432	9.11952020	-0.09041384		30.00000000	1.14466667	10.43881079	0.661054
31	-0.00066175	9.12258820	-0.00603688		31.00000000	1.10774194	10.10547351	0.682601
32	0.00948223	9.10949710	0.08637833		32.00000000	1.07312500	9.77562908	0.704070
33	0.01930164	9.11809160	0.17599412		33.00000000	1.04060606	9.48834138	0.725446
34	0.02941874	9.11444190	0.26813543		34.00000000	1.01000000	9.20558632	0.746825
35	0.03924709	9.12116430	0.35797914		35.00000000	0.98114286	8.94916520	0.768188
36	0.04940438	9.11461540	0.45030191		36.00000000	0.95388889	8.69433036	0.789677
37	0.05922603	9.12613580	0.54050475		37.00000000	0.92810811	8.47004063	0.811051
38	0.06935503	9.12775990	0.63305609		38.00000000	0.90368421	8.24861250	0.832431
39	0.07950712	9.11901280	0.72502644		39.00000000	0.88051282	8.02940768	0.853789
40	0.08933993	9.11603260	0.81442569		40.00000000	0.85850000	7.82611399	0.875264
41	0.09950913	9.12409500	0.90793073		41.00000000	0.83756098	7.64198591	0.896658
42	0.10929579	9.11547660	0.99628322		42.00000000	0.81761905	7.45298730	0.918030
43	0.11944193	9.10413840	1.08741586		43.00000000	0.79860465	7.27060727	0.939389
44	0.12927102	9.11952880	1.17889079		44.00000000	0.78045455	7.11737770	0.960866
45	0.13942087	9.13252830	1.27326504		45.00000000	0.76311111	6.96913382	0.982243
46	0.14925218	9.11567500	1.36053437		46.00000000	0.74652174	6.80504955	1.003635
47	0.15939310	9.11822030	1.45338140		47.00000000	0.73063830	6.66212096	1.025114
48	0.16951914	9.12424180	1.54673362		48.00000000	0.71541667	6.52763465	1.046494
49	0.17933556	9.10700040	1.63320902		49.00000000	0.70081633	6.38233457	1.067859
50	0.18952264	9.12562560	1.72951266		50.00000000	0.68680000	6.26747966	1.089237
51	0.19930111	9.10164830	1.81396861		51.00000000	0.67333333	6.12844319	1.110715
52	0.20944352	9.11455730	1.90898496		52.00000000	0.66038462	6.01911342	1.132114
53	0.21928079	9.11547370	1.99884827		53.00000000	0.64792453	5.90613900	1.153473
54	0.22940460	9.13377950	2.09533103		54.00000000	0.63592593	5.80840719	1.174852
55	0.23923963	9.11801530	2.18139061		55.00000000	0.62436364	5.69295719	1.196326
56	0.24935971	9.10851760	2.27129731		56.00000000	0.61321429	5.58547311	1.217697
57	0.25953189	9.13558200	2.37097486		57.00000000	0.60245614	5.50378747	1.239061
58	0.26936546	9.09397130	2.44960176		58.00000000	0.59206897	5.38425818	1.260442
59	0.27948627	9.12674330	2.55079944		59.00000000	0.58203390	5.31207398	1.281913
60	0.28931832	9.11203860	2.63627970		60.00000000	0.57233333	5.21512343	1.303300
61	0.29948530	9.12983610	2.73425170		61.00000000	0.56295082	5.13964872	1.324647
62	0.30928835	9.11010650	2.81764981		62.00000000	0.55387097	5.04582350	1.346024
63	0.31942928	9.10056500	2.90698693		63.00000000	0.54507937	4.96053019	1.367508
64	0.32925165	9.11838530	3.00224341		64.00000000	0.53656250	4.89258361	1.388888
65	0.33939406	9.10700700	3.09086408		65.00000000	0.52830769	4.81130185	1.410236
66	0.34922388	9.11147500	3.18194465		66.00000000	0.52030303	4.74072805	1.431624
67	0.35934100	9.11518480	3.27545962		67.00000000	0.51253731	4.67187233	1.453098
68	0.36951765	9.11433890	3.36790909		68.00000000	0.50500000	4.60274114	1.474484
69	0.37937278	9.10328010	3.45353668		69.00000000	0.49768116	4.53053099	1.495839
70	0.38947424	9.10951710	3.54792225		70.00000000	0.49057143	4.46886882	1.517204
71	0.39927953	9.10239410	3.63439964		71.00000000	0.48366197	4.40248188	1.538684
72	0.40944278	9.11356930	3.73148515		72.00000000	0.47694444	4.34666625	1.560048
73	0.41927484	9.11624240	3.82221107		73.00000000	0.47041096	4.28838033	1.581416
74	0.42942914	9.09222220	3.90446516		74.00000000	0.46405405	4.21928257	1.602770
75	0.43923220	9.10891630	4.00092935		75.00000000	0.45786667	4.17066914	1.624250
76	0.44936344	9.09458730	4.08677503		76.00000000	0.45184211	4.10931747	1.645621
77	0.45953041	9.09879110	4.18117120		77.00000000	0.44597403	4.05782450	1.667009
78	0.46940786	9.09366230	4.26863656		78.00000000	0.44025641	4.00354312	1.688495
79	0.47956070	9.07995890	4.35439145		79.00000000	0.43468354	3.94690872	1.709869
80	0.48934513	9.07815840	4.44235260		80.00000000	0.42925000	3.89679949	1.731232
81	0.49948382	9.05129530	4.52097555		81.00000000	0.42395062	3.83730223	1.752605
82	0.50930846	9.04767890	4.60805941		82.00000000	0.41878049	3.78899138	1.774080
83	0.51944935	9.01844600	4.68462591		83.00000000	0.41373494	3.73124621	1.795451
84	0.52925611	8.98313520	4.75437919		84.00000000	0.40880952	3.67239122	1.816793
85	0.53938287	8.92968370	4.81651842		85.00000000	0.40400000	3.60759221	1.838186
86	0.54952604	8.85608670	4.86665025		86.00000000	0.39930233	3.53625601	1.859667
87	0.55934918	8.76964660	4.90529463		87.00000000	0.39471264	3.46149039	1.881032
88	0.56946033	8.63773160	4.91884549		88.00000000	0.39022727	3.37067844	1.902391
89	0.57929015	8.43817810	4.88815346		89.00000000	0.38584270	3.25580939	1.923795
90	0.58939236	8.18494610	4.82414470		90.00000000	0.38155556	3.12301166	1.945270
91	0.59918946	7.83798550	4.69643830		91.00000000	0.37736264	2.95776288	1.966649
92	0.60931921	7.35633090	4.48235373		92.00000000	0.37326087	2.74583047	1.988100
93	0.61911482	6.74811840	4.17786011		93.00000000	0.36924731	2.49172458	2.009513
94	0.62925124	5.91360000	3.72114013		94.00000000	0.36531915	2.16035132	2.031026
95	0.63934678	4.86995840	3.11359222		95.00000000	0.36147368	1.76036180	2.052409
96	0.64912677	3.58401160	2.32647787		96.00000000	0.35770833	1.28203082	2.073765
97	0.65915304	1.97175660	1.29968936		97.00000000	0.35402062	0.69804249	2.095183
98	0.66897696	0.06698903	0.04481412		98.00000000	0.35040816	0.02347350	2.116675
99	0.67905015	-2.24193740	-1.52238793		99.00000000	0.34686869	-0.77765788	2.138075
100	0.68878394	-4.85586170	-3.34463955		100.00000000	0.34340000	-1.66750291	2.159442
101	0.69903207	-8.01266000	-5.60110631		101.00000000	0.34000000	-2.72430440	2.180807
02:19 04/04/2018
Test Lot:	JK-PERC
Recipe:	Recipe_YJX-LID
Cell Name:	3-6-3h
Test Order:	3
Test Condition:	Light
1	-0.29992864	9.11903480	-2.73505971		1.00000000	34.34000000	313.14765503	0.000000
2	-0.29010224	9.11792180	-2.64512954		2.00000000	17.17000000	156.55471731	0.021584
3	-0.27994913	9.11635110	-2.55211456		3.00000000	11.44666667	104.35183226	0.042979
4	-0.27014506	9.12268450	-2.46444815		4.00000000	8.58500000	78.31824643	0.064342
5	-0.25999939	9.11176490	-2.36905332		5.00000000	6.86800000	62.57960133	0.085712
6	-0.24987233	9.11206050	-2.27685179		6.00000000	5.72333333	52.15135960	0.107206
7	-0.24004519	9.12412830	-2.19020311		7.00000000	4.90571429	44.76036655	0.128598
8	-0.22990102	9.12361240	-2.09752780		8.00000000	4.29250000	39.16310623	0.149943
9	-0.22006272	9.13357260	-2.00995883		9.00000000	3.81555556	34.84965368	0.171366
10	-0.20992745	9.09579370	-1.90945678		10.00000000	3.43400000	31.23495557	0.192859
11	-0.20008469	9.11396310	-1.82356448		11.00000000	3.12181818	28.45213571	0.214231
12	-0.18995167	9.10437870	-1.72939194		12.00000000	2.86166667	26.05369705	0.235574
13	-0.18017961	9.13236140	-1.64546532		13.00000000	2.64153846	24.12348388	0.256960
14	-0.17000863	9.11433030	-1.54951481		14.00000000	2.45285714	22.35615018	0.278440
15	-0.16020457	9.10862260	-1.45924297		15.00000000	2.28933333	20.85267334	0.299824
16	-0.15006486	9.12718390	-1.36966957		16.00000000	2.14625000	19.58921845	0.321176
17	-0.13991322	9.10715200	-1.27421096		17.00000000	2.02000000	18.39644704	0.342548
18	-0.13011065	9.12159820	-1.18681707		18.00000000	1.90777778	17.40198234	0.364016
19	-0.11994115	9.11642930	-1.09343501		19.00000000	1.80736842	16.47674643	0.385389
20	-0.11011774	9.12680050	-1.00502264		20.00000000	1.71700000	15.67071646	0.406729
21	-0.09995793	9.11632440	-0.91124890		21.00000000	1.63523810	14.90736095	0.428108
22	-0.09016429	9.11433510	-0.82178754		22.00000000	1.56090909	14.22664852	0.449576
23	-0.08000670	9.11579700	-0.72932487		23.00000000	1.49304348	13.61028126	0.470964
24	-0.07020710	9.11903000	-0.64022069		24.00000000	1.43083333	13.04781209	0.492362
25	-0.06006069	9.11847880	-0.54766210		25.00000000	1.37360000	12.52514248	0.513710
26	-0.04987855	9.10941510	-0.45436437		26.00000000	1.32076923	12.03143517	0.535189
27	-0.04007002	9.11358070	-0.36518132		27.00000000	1.27185185	11.59112449	0.556581
28	-0.02991839	9.12505150	-0.27300683		28.00000000	1.22642857	11.19122388	0.577962
29	-0.02008679	9.12298680	-0.18325150		29.00000000	1.18413793	10.80287471	0.599398
30	-0.00995153	9.11847880	-0.09074284		30.00000000	1.14466667	10.43761873	0.620870
31	-0.00070417	9.11285690	-0.00641703		31.00000000	1.10774194	10.09469374	0.642356
32	0.00949414	9.12697700	0.08665276		32.00000000	1.07312500	9.79438719	0.663735
33	0.01930387	9.11680700	0.17598967		33.00000000	1.04060606	9.48700462	0.685090
34	0.02944628	9.11090090	0.26828215		34.00000000	1.01000000	9.20200991	0.706575
35	0.03926123	9.11663340	0.35793020		35.00000000	0.98114286	8.94471974	0.727975
36	0.04941033	9.11273670	0.45026335		36.00000000	0.95388889	8.69253829	0.749332
37	0.05924761	9.10664650	0.53954700		37.00000000	0.92810811	8.45195245	0.770694
38	0.06938406	9.11416150	0.63237754		38.00000000	0.90368421	8.23632384	0.792174
39	0.07952201	9.12357900	0.72552530		39.00000000	0.88051282	8.03342828	0.813552
40	0.08933621	9.11939530	0.81469220		40.00000000	0.85850000	7.82900087	0.834929
41	0.09948532	9.10774800	0.90608718		41.00000000	0.83756098	7.62829430	0.856287
42	0.10929952	9.11936660	0.99674239		42.00000000	0.81761905	7.45616783	0.877756
43	0.11944341	9.12350560	1.08974262		43.00000000	0.79860465	7.28607401	0.899144
44	0.12927547	9.11106110	1.17783671		44.00000000	0.78045455	7.11076905	0.920540
45	0.13942607	9.12014290	1.27158568		45.00000000	0.76311111	6.95968238	0.942010
46	0.14924176	9.11425020	1.36022674		46.00000000	0.74652174	6.80398591	0.963421
47	0.15941319	9.11653610	1.45329610		47.00000000	0.73063830	6.66089042	0.984776
48	0.16953848	9.11489960	1.54532622		48.00000000	0.71541667	6.52095109	1.006153
49	0.17935343	9.13236140	1.63792034		49.00000000	0.70081633	6.40010797	1.027631
50	0.18950403	9.11494640	1.72731908		50.00000000	0.68680000	6.26014519	1.049005
51	0.19928177	9.12491610	1.81842943		51.00000000	0.67333333	6.14411017	1.070350
52	0.20940557	9.11399650	1.90852163		52.00000000	0.66038462	6.01874307	1.091730
53	0.21922795	9.11595730	1.99847263		53.00000000	0.64792453	5.90645233	1.113210
54	0.22939195	9.11941050	2.09191936		54.00000000	0.63592593	5.79926957	1.134584
55	0.23919572	9.11256980	2.17968769		55.00000000	0.62436364	5.68955722	1.155946
56	0.24934706	9.11373420	2.27248283		56.00000000	0.61321429	5.58867201	1.177335
57	0.25951776	9.10436340	2.36274400		57.00000000	0.60245614	5.48497963	1.198803
58	0.26932526	9.11620430	2.45522409		58.00000000	0.59206897	5.39742165	1.220184
59	0.27946320	9.11570170	2.54750317		59.00000000	0.58203390	5.30564740	1.241531
60	0.28928187	9.12068840	2.63844980		60.00000000	0.57233333	5.22007399	1.262904
61	0.29943991	9.11040690	2.72801942		61.00000000	0.56295082	5.12871103	1.284383
62	0.30926529	9.12561230	2.82223513		62.00000000	0.55387097	5.05441172	1.305765
63	0.31940395	9.11289690	2.91069527		63.00000000	0.54507937	4.96725206	1.327121
64	0.32923529	9.12342070	3.00375206		64.00000000	0.53656250	4.89528542	1.348492
65	0.33936504	9.11420820	3.09304363		65.00000000	0.52830769	4.81510630	1.369965
66	0.34920081	9.11274620	3.18217835		66.00000000	0.52030303	4.74138946	1.391352
67	0.35934696	9.11359790	3.27494370		67.00000000	0.51253731	4.67105898	1.412721
68	0.36951837	9.10405830	3.36411678		68.00000000	0.50500000	4.59754944	1.434083
69	0.37934524	9.11389160	3.45731140		69.00000000	0.49768116	4.53581214	1.455565
70	0.38948542	9.11558340	3.55038683		70.00000000	0.49057143	4.47184477	1.476939
71	0.39932418	9.11701200	3.64064334		71.00000000	0.48366197	4.40955200	1.498320
72	0.40944350	9.09755230	3.72493366		72.00000000	0.47694444	4.33902703	1.519657
73	0.41927856	9.12280460	3.82499638		73.00000000	0.47041096	4.29146726	1.541122
74	0.42941427	9.09743880	3.90657004		74.00000000	0.46405405	4.22170336	1.562515
75	0.43925005	9.11574840	4.00409294		75.00000000	0.45786667	4.17379733	1.583889
76	0.44939840	9.08338170	4.08205720		76.00000000	0.45184211	4.10425431	1.605378
77	0.45953858	9.11330700	4.18791616		77.00000000	0.44597403	4.06429821	1.626764
78	0.46940711	9.08309650	4.26367008		78.00000000	0.44025641	3.99889146	1.648101
79	0.47953093	9.08321860	4.35568426		79.00000000	0.43468354	3.94832565	1.669481
80	0.48933321	9.07411290	4.44026479		80.00000000	0.42925000	3.89506296	1.690963
81	0.49947861	9.05671600	4.52363592		81.00000000	0.42395062	3.83960034	1.712343
82	0.50929576	9.04329970	4.60571419		82.00000000	0.41878049	3.78715746	1.733704
83	0.51942998	9.01379870	4.68203728		83.00000000	0.41373494	3.72932346	1.755086
84	0.52922112	8.98305890	4.75402449		84.00000000	0.40880952	3.67236003	1.776563
85	0.53933823	8.91917320	4.81045109		85.00000000	0.40400000	3.60334597	1.797924
86	0.54953867	8.86876010	4.87372663		86.00000000	0.39930233	3.54131653	1.819274
87	0.55933803	8.77187820	4.90644507		87.00000000	0.39471264	3.46237123	1.840647
88	0.56944543	8.62873270	4.91359240		88.00000000	0.39022727	3.36716683	1.862122
89	0.57929015	8.45056340	4.89532814		89.00000000	0.38584270	3.26058817	1.883486
90	0.58940357	8.19104290	4.82782993		90.00000000	0.38155556	3.12533792	1.904829
91	0.59919167	7.85196920	4.70483454		91.00000000	0.37736264	2.96303981	1.926210
92	0.60928500	7.37973640	4.49636269		92.00000000	0.37326087	2.75456683	1.947677
93	0.61911929	6.75508360	4.18220256		93.00000000	0.36924731	2.49429646	1.969060
94	0.62922370	5.95063070	3.74427787		94.00000000	0.36531915	2.17387934	1.990520
95	0.63936388	4.90043350	3.13316018		95.00000000	0.36147368	1.77137775	2.011921
96	0.64913571	3.60319570	2.33896300		96.00000000	0.35770833	1.28889313	2.033415
97	0.65915829	1.99437870	1.31461125		97.00000000	0.35402062	0.70605118	2.054795
98	0.66896802	0.07552296	0.05052244		98.00000000	0.35040816	0.02646386	2.076152
99	0.67907768	-2.27805470	-1.54697610		99.00000000	0.34686869	-0.79018584	2.097517
100	0.68878990	-4.92889070	-3.39497013		100.00000000	0.34340000	-1.69258107	2.119003
101	0.69903952	-8.13746360	-5.68840865		101.00000000	0.34000000	-2.76673762	2.140379
02:20 04/04/2018
Test Lot:	JK-PERC
Recipe:	Recipe_YJX-LID
Cell Name:	3-6-3h
Test Order:	4
Test Condition:	Light
1	-0.29993758	9.11488630	-2.73389694		1.00000000	34.34000000	313.00519554	0.000000
2	-0.29016182	9.12248800	-2.64699772		2.00000000	17.17000000	156.63311896	0.061750
3	-0.27996036	9.12553020	-2.55478672		3.00000000	11.44666667	104.45690236	0.083229
4	-0.27016971	9.10998630	-2.46124236		4.00000000	8.58500000	78.20923239	0.104665
5	-0.25999355	9.12540150	-2.37254553		5.00000000	6.86800000	62.67325750	0.126036
6	-0.24986130	9.11083030	-2.27644390		6.00000000	5.72333333	52.14431875	0.147470
7	-0.23999771	9.11876300	-2.18848224		7.00000000	4.90571429	44.73404592	0.168999
8	-0.22987513	9.11431880	-2.09515522		8.00000000	4.29250000	39.12321345	0.190408
9	-0.22005770	9.12087060	-2.00711781		9.00000000	3.81555556	34.80118849	0.211762
10	-0.20989196	9.11604600	-1.91338476		10.00000000	3.43400000	31.30450196	0.233129
11	-0.20008345	9.11298180	-1.82335684		11.00000000	3.12181818	28.44907227	0.254617
12	-0.18994227	9.12569710	-1.73335562		12.00000000	2.86166667	26.11470320	0.275983
13	-0.18010548	9.09541800	-1.63813462		13.00000000	2.64153846	24.02589647	0.297324
14	-0.16997844	9.12772180	-1.55151591		14.00000000	2.45285714	22.38899762	0.318705
15	-0.16017738	9.10861110	-1.45899346		15.00000000	2.28933333	20.85264701	0.340189
16	-0.15001833	9.11747460	-1.36778831		16.00000000	2.14625000	19.56837986	0.361580
17	-0.13986523	9.11574360	-1.27497558		17.00000000	2.02000000	18.41380207	0.382928
18	-0.13002622	9.11399460	-1.18505827		18.00000000	1.90777778	17.38747636	0.404305
19	-0.11989695	9.12641140	-1.09422889		19.00000000	1.80736842	16.49478776	0.425796
20	-0.11008323	9.12565040	-1.00458107		20.00000000	1.71700000	15.66874174	0.447178
21	-0.09993312	9.12082390	-0.91147237		21.00000000	1.63523810	14.91471870	0.468522
22	-0.09010005	9.11449050	-0.82121605		22.00000000	1.56090909	14.22689108	0.489897
23	-0.07996706	9.12114430	-0.72939108		23.00000000	1.49304348	13.61826501	0.511377
24	-0.07014069	9.11368080	-0.63923986		24.00000000	1.43083333	13.04015828	0.532760
25	-0.05997346	9.11090560	-0.54641250		25.00000000	1.37360000	12.51473993	0.554117
26	-0.04985162	9.11650850	-0.45447274		26.00000000	1.32076923	12.04080392	0.575487
27	-0.04000442	9.12277510	-0.36495130		27.00000000	1.27185185	11.60281840	0.596958
28	-0.02989003	9.12373640	-0.27270873		28.00000000	1.22642857	11.18961100	0.618333
29	-0.02007036	9.10610770	-0.18276287		29.00000000	1.18413793	10.78288753	0.639685
30	-0.00992099	9.12133790	-0.09049269		30.00000000	1.14466667	10.44089145	0.661064
31	-0.00064909	9.10532000	-0.00591019		31.00000000	1.10774194	10.08634480	0.682656
32	0.00947105	9.11951540	0.08637136		32.00000000	1.07312500	9.78637996	0.704036
33	0.01932244	9.11134820	0.17605344		33.00000000	1.04060606	9.48132416	0.725429
34	0.02945589	9.11083410	0.26836772		34.00000000	1.01000000	9.20194244	0.746778
35	0.03925518	9.12199400	0.35808554		35.00000000	0.98114286	8.94997926	0.768255
36	0.04941617	9.12403010	0.45087465		36.00000000	0.95388889	8.70331093	0.789636
37	0.05924672	9.11149120	0.53982600		37.00000000	0.92810811	8.45644886	0.811018
38	0.06939283	9.12105270	0.63293566		38.00000000	0.90368421	8.24255131	0.832434
39	0.07954340	9.11164470	0.72477117		39.00000000	0.88051282	8.02291997	0.853906
40	0.08935758	9.11319730	0.81433323		40.00000000	0.85850000	7.82367988	0.875269
41	0.09950145	9.11864090	0.90731796		41.00000000	0.83756098	7.63741777	0.896637
42	0.10934391	9.10931490	0.99604811		42.00000000	0.81761905	7.44794937	0.918006
43	0.11946843	9.10682870	1.08797853		43.00000000	0.79860465	7.27275576	0.939500
44	0.12931313	9.11913490	1.17922388		44.00000000	0.78045455	7.11707028	0.960899
45	0.13946369	9.11502650	1.27121523		45.00000000	0.76311111	6.95577800	0.982266
46	0.14930317	9.11647510	1.36111863		46.00000000	0.74652174	6.80564685	1.003626
47	0.15940984	9.11897950	1.45365506		47.00000000	0.73063830	6.66267566	1.025099
48	0.16954626	9.11257460	1.54500294		48.00000000	0.71541667	6.51928775	1.046480
49	0.17940509	9.11269660	1.63486415		49.00000000	0.70081633	6.38632656	1.067857
50	0.18953930	9.12577250	1.72969253		50.00000000	0.68680000	6.26758055	1.089215
51	0.19930212	9.11120610	1.81588269		51.00000000	0.67333333	6.13487877	1.110697
52	0.20945641	9.11204530	1.90857630		52.00000000	0.66038462	6.01745453	1.132063
53	0.21927506	9.11681370	1.99908987		53.00000000	0.64792453	5.90700722	1.153461
54	0.22940552	9.10624120	2.08902200		54.00000000	0.63592593	5.79089487	1.174942
55	0.23927031	9.11623100	2.18124342		55.00000000	0.62436364	5.69184314	1.196309
56	0.24940376	9.11351110	2.27294394		56.00000000	0.61321429	5.58853520	1.217668
57	0.25953200	9.10846710	2.36393868		57.00000000	0.60245614	5.48745193	1.239048
58	0.26937222	9.12619300	2.45834287		58.00000000	0.59206897	5.40333565	1.260522
59	0.27951014	9.10828880	2.54585908		59.00000000	0.58203390	5.30133284	1.281893
60	0.28934965	9.11833380	2.63838669		60.00000000	0.57233333	5.21872638	1.303227
61	0.29944587	9.10364910	2.72605012		61.00000000	0.56295082	5.12490672	1.324611
62	0.30929875	9.11564540	2.81945773		62.00000000	0.55387097	5.04889134	1.346084
63	0.31945974	9.11527820	2.91196440		63.00000000	0.54507937	4.96855005	1.367451
64	0.32926500	9.10714720	2.99866482		64.00000000	0.53656250	4.88655367	1.388816
65	0.33940217	9.11463930	3.09352836		65.00000000	0.52830769	4.81533405	1.410197
66	0.34924015	9.09874060	3.17764553		66.00000000	0.52030303	4.73410231	1.431686
67	0.35937807	9.10761640	3.27307760		67.00000000	0.51253731	4.66799324	1.453088
68	0.36952865	9.10765270	3.36553861		68.00000000	0.50500000	4.59936461	1.474441
69	0.37934059	9.11547370	3.45786917		69.00000000	0.49768116	4.53659952	1.495818
70	0.38950157	9.11542320	3.55047165		70.00000000	0.49057143	4.47176618	1.517303
71	0.39929119	9.11586380	3.63988410		71.00000000	0.48366197	4.40899666	1.538685
72	0.40949461	9.09736540	3.72532210		72.00000000	0.47694444	4.33893789	1.560046
73	0.41931102	9.09859750	3.81514220		73.00000000	0.47041096	4.28007997	1.581422
74	0.42944077	9.11340240	3.91366654		74.00000000	0.46405405	4.22911133	1.602903
75	0.43925196	9.10360240	3.99877520		75.00000000	0.45786667	4.16823609	1.624288
76	0.44940549	9.10160640	4.09031188		76.00000000	0.45184211	4.11248900	1.645661
77	0.45959553	9.09621720	4.18058077		77.00000000	0.44597403	4.05667661	1.667024
78	0.46943054	9.09234050	4.26822231		78.00000000	0.44025641	4.00296119	1.688493
79	0.47955579	9.08169460	4.35517923		79.00000000	0.43468354	3.94766320	1.709875
80	0.48937222	9.07181450	4.43949400		80.00000000	0.42925000	3.89407637	1.731248
81	0.49953097	9.05703640	4.52427018		81.00000000	0.42395062	3.83973617	1.752610
82	0.50933921	9.04173090	4.60530807		82.00000000	0.41878049	3.78650048	1.774080
83	0.51946223	9.00802040	4.67932636		83.00000000	0.41373494	3.72693278	1.795450
84	0.52926821	8.98356060	4.75471304		84.00000000	0.40880952	3.67256513	1.816850
85	0.53937560	8.92458340	4.81370253		85.00000000	0.40400000	3.60553169	1.838333
86	0.54951650	8.85685350	4.86698714		86.00000000	0.39930233	3.53656220	1.859718
87	0.55935597	8.77750020	4.90974714		87.00000000	0.39471264	3.46459031	1.881064
88	0.56948948	8.62385180	4.91119288		88.00000000	0.39022727	3.36526217	1.902449
89	0.57929021	8.45855900	4.89996042		89.00000000	0.38584270	3.26367321	1.923936
90	0.58944154	8.19038870	4.82775533		90.00000000	0.38155556	3.12508831	1.945312
91	0.59923118	7.86061950	4.71032830		91.00000000	0.37736264	2.96630411	1.966663
92	0.60934675	7.37670520	4.49497134		92.00000000	0.37326087	2.75343540	1.988143
93	0.61914307	6.77279140	4.19332686		93.00000000	0.36924731	2.50083502	2.009658
94	0.62928474	5.94745830	3.74264475		94.00000000	0.36531915	2.17272040	2.031043
95	0.63937724	4.90192840	3.13418145		95.00000000	0.36147368	1.77191812	2.052409
96	0.64915270	3.60182930	2.33813722		96.00000000	0.35770833	1.28840436	2.073795
97	0.65915519	1.97992960	1.30508087		97.00000000	0.35402062	0.70093590	2.095276
98	0.66899240	0.06866672	0.04593751		98.00000000	0.35040816	0.02406138	2.116675
99	0.67909539	-2.28786660	-1.55367966		99.00000000	0.34686869	-0.79358928	2.138026
100	0.68878973	-4.94930600	-3.40903114		100.00000000	0.34340000	-1.69959168	2.159457
101	0.69903779	-8.17543890	-5.71494074		101.00000000	0.34000000	-2.77964923	2.180953
