# Supplementary material for: Study on the Electrical Injection Regeneration of Industrialized B-Doped Czochralski Silicon PERC Solar Cells
Source: Hindawi journal article supplement (doi:10.1155/2019/5357370), 2019-06-20
Supplement: f1 [file 5357370.f1.zip › section3.3/IVRawData_3-6-4h.csv]

03:22 04/04/2018
Test Lot:	JK-PERC
Recipe:	Recipe_YJX-LID
Cell Name:	3-6-4h
Test Order:	2
Test Condition:	Light
1	-0.29993644	9.09972100	-2.72933792		1.00000000	34.34000000	312.48441914	0.000000
2	-0.29015601	9.10891150	-2.64300542		2.00000000	17.17000000	156.40001046	0.061808
3	-0.28002650	9.10751820	-2.55034645		3.00000000	11.44666667	104.25072500	0.083237
4	-0.27021253	9.11458110	-2.46287402		4.00000000	8.58500000	78.24867874	0.104603
5	-0.26001009	9.09776020	-2.36550945		5.00000000	6.86800000	62.48341705	0.126088
6	-0.24986123	9.11584570	-2.27769642		6.00000000	5.72333333	52.17302356	0.147484
7	-0.24002942	9.09640220	-2.18340414		7.00000000	4.90571429	44.62435022	0.168870
8	-0.22992074	9.10735800	-2.09397049		8.00000000	4.29250000	39.09333422	0.190345
9	-0.22013211	9.10622500	-2.00457252		9.00000000	3.81555556	34.74530739	0.211727
10	-0.20996241	9.11091800	-1.91295030		10.00000000	3.43400000	31.28689241	0.233075
11	-0.20014028	9.10617450	-1.82251231		11.00000000	3.12181818	28.42782112	0.254458
12	-0.19001970	9.11283680	-1.73161851		12.00000000	2.86166667	26.07790131	0.275928
13	-0.18021767	9.09674550	-1.63939428		13.00000000	2.64153846	24.02940311	0.297299
14	-0.17006880	9.11250970	-1.54975359		14.00000000	2.45285714	22.35168451	0.318654
15	-0.16022211	9.10372640	-1.45861825		15.00000000	2.28933333	20.84146431	0.340022
16	-0.15008590	9.10491850	-1.36651989		16.00000000	2.14625000	19.54143133	0.361514
17	-0.13994448	9.11018180	-1.27491965		17.00000000	2.02000000	18.40256724	0.382903
18	-0.13010299	9.10435580	-1.18450391		18.00000000	1.90777778	17.36908768	0.404262
19	-0.11999209	9.11183740	-1.09334841		19.00000000	1.80736842	16.46844717	0.425631
20	-0.11014093	9.09775070	-1.00203472		20.00000000	1.71700000	15.62083795	0.447121
21	-0.10000844	9.11377530	-0.91145445		21.00000000	1.63523810	14.90319256	0.468494
22	-0.09020045	9.10659890	-0.82141936		22.00000000	1.56090909	14.21457301	0.489831
23	-0.08004787	9.10687920	-0.72898626		23.00000000	1.49304348	13.59696660	0.511210
24	-0.07022723	9.10594650	-0.63948538		24.00000000	1.43083333	13.02909178	0.532704
25	-0.06003669	9.10099600	-0.54639363		25.00000000	1.37360000	12.50112811	0.554089
26	-0.04991685	9.10939880	-0.45471248		26.00000000	1.32076923	12.03141365	0.575445
27	-0.04008355	9.10932250	-0.36513402		27.00000000	1.27185185	11.58570869	0.596812
28	-0.02992725	9.10721970	-0.27255400		28.00000000	1.22642857	11.16935445	0.618274
29	-0.02009693	9.10598950	-0.18300243		29.00000000	1.18413793	10.78274757	0.639653
30	-0.00998677	9.10674190	-0.09094692		30.00000000	1.14466667	10.42418389	0.661030
31	-0.00070498	9.10412880	-0.00641821		31.00000000	1.10774194	10.08502526	0.682514
32	0.00948164	9.10334970	0.08631465		32.00000000	1.07312500	9.76903215	0.703989
33	0.01926553	9.10455610	0.17540409		33.00000000	1.04060606	9.47425626	0.725369
34	0.02940964	9.10466960	0.26776504		34.00000000	1.01000000	9.19571630	0.746771
35	0.03921139	9.10612490	0.35706383		35.00000000	0.98114286	8.93440940	0.768131
36	0.04936146	9.10433770	0.44940336		36.00000000	0.95388889	8.68452657	0.789609
37	0.05918479	9.09826560	0.53847897		37.00000000	0.92810811	8.44417407	0.810993
38	0.06935123	9.11316390	0.63200916		38.00000000	0.90368421	8.23542232	0.832382
39	0.07946929	9.10226150	0.72335029		39.00000000	0.88051282	8.01465795	0.853864
40	0.08932687	9.11368180	0.81409663		40.00000000	0.85850000	7.82409583	0.875247
41	0.09945237	9.10263820	0.90527893		41.00000000	0.83756098	7.62401453	0.896605
42	0.10926529	9.11052420	0.99546407		42.00000000	0.81761905	7.44893812	0.917980
43	0.11941908	9.09751510	1.08641688		43.00000000	0.79860465	7.26531787	0.939454
44	0.12924092	9.10262870	1.17643211		44.00000000	0.78045455	7.10418794	0.960830
45	0.13940662	9.10252860	1.26895275		45.00000000	0.76311111	6.94624071	0.982184
46	0.14919497	9.09778400	1.35734361		46.00000000	0.74652174	6.79169353	1.003566
47	0.15933909	9.11653710	1.45262073		47.00000000	0.73063830	6.66089115	1.025053
48	0.16951221	9.10459420	1.54333988		48.00000000	0.71541667	6.51357843	1.046440
49	0.17933406	9.10414410	1.63268312		49.00000000	0.70081633	6.38033282	1.067788
50	0.18947370	9.10247990	1.72468055		50.00000000	0.68680000	6.25158320	1.089158
51	0.19925612	9.11362460	1.81594548		51.00000000	0.67333333	6.13650723	1.110649
52	0.20939428	9.10328290	1.90617537		52.00000000	0.66038462	6.01166798	1.132023
53	0.21920422	9.10416410	1.99567119		53.00000000	0.64792453	5.89881123	1.153385
54	0.22937958	9.10252000	2.08793221		54.00000000	0.63592593	5.78852846	1.174769
55	0.23915157	9.11190220	2.17912572		55.00000000	0.62436364	5.68914039	1.196240
56	0.24932098	9.09181590	2.26678045		56.00000000	0.61321429	5.57523139	1.217628
57	0.25948370	9.09822560	2.36084124		57.00000000	0.60245614	5.48128188	1.238980
58	0.26931894	9.10296250	2.45160021		58.00000000	0.59206897	5.38958159	1.260356
59	0.27945784	9.10485840	2.54442406		59.00000000	0.58203390	5.29933623	1.281839
60	0.28925589	9.11149690	2.63555415		60.00000000	0.57233333	5.21481339	1.303215
61	0.29943570	9.09883980	2.72451746		61.00000000	0.56295082	5.12219932	1.324579
62	0.30926797	9.10366340	2.81547150		62.00000000	0.55387097	5.04225486	1.345949
63	0.31938082	9.09289550	2.90409642		63.00000000	0.54507937	4.95634971	1.367425
64	0.32923618	9.09498500	2.99439812		64.00000000	0.53656250	4.88002789	1.388854
65	0.33934978	9.10960770	3.09134337		65.00000000	0.52830769	4.81267582	1.410255
66	0.34919021	9.10545920	3.17953721		66.00000000	0.52030303	4.73759801	1.431629
67	0.35934624	9.08925250	3.26618871		67.00000000	0.51253731	4.65858106	1.453101
68	0.36949036	9.10649870	3.36476348		68.00000000	0.50500000	4.59878184	1.474487
69	0.37930772	9.09541030	3.44995934		69.00000000	0.49768116	4.52661434	1.495875
70	0.38941240	9.09367660	3.54119043		70.00000000	0.49057143	4.46109792	1.517375
71	0.39926699	9.10517500	3.63539582		71.00000000	0.48366197	4.40382689	1.538746
72	0.40944833	9.09591290	3.72430635		72.00000000	0.47694444	4.33824512	1.560098
73	0.41925529	9.09521010	3.81321495		73.00000000	0.47041096	4.27848650	1.581478
74	0.42942247	9.10750960	3.91096927		74.00000000	0.46405405	4.22637675	1.602943
75	0.43919668	9.08613680	3.99060112		75.00000000	0.45786667	4.16023917	1.624325
76	0.44935715	9.09329610	4.08613762		76.00000000	0.45184211	4.10873405	1.645695
77	0.45953029	9.08535190	4.17499439		77.00000000	0.44597403	4.05183096	1.667069
78	0.46938190	9.08261490	4.26321504		78.00000000	0.44025641	3.99867943	1.688551
79	0.47948062	9.06372170	4.34587890		79.00000000	0.43468354	3.93985067	1.709932
80	0.48933446	9.07439610	4.44041472		80.00000000	0.42925000	3.89518453	1.731274
81	0.49947634	9.05213450	4.52132701		81.00000000	0.42395062	3.83765801	1.752648
82	0.50927883	9.02805810	4.59779887		82.00000000	0.41878049	3.78077458	1.774123
83	0.51943117	9.00866510	4.67938145		83.00000000	0.41373494	3.72719951	1.795499
84	0.52919567	8.98113060	4.75277543		84.00000000	0.40880952	3.67157172	1.816866
85	0.53931153	8.92734910	4.81462230		85.00000000	0.40400000	3.60664904	1.838245
86	0.54948467	8.84606270	4.86077584		86.00000000	0.39930233	3.53225341	1.859722
87	0.55930352	8.76246550	4.90087780		87.00000000	0.39471264	3.45865592	1.881106
88	0.56942010	8.63060000	4.91443712		88.00000000	0.39022727	3.36789550	1.902465
89	0.57920247	8.44522950	4.89149779		89.00000000	0.38584270	3.25853012	1.923834
90	0.58937341	8.18236060	4.82246577		90.00000000	0.38155556	3.12202514	1.945303
91	0.59914392	7.83946940	4.69697043		91.00000000	0.37736264	2.95832285	1.966675
92	0.60927981	7.36604930	4.48798512		92.00000000	0.37326087	2.74945797	1.988146
93	0.61908305	6.75790070	4.18370178		93.00000000	0.36924731	2.49533667	2.009587
94	0.62919146	5.93605470	3.73491492		94.00000000	0.36531915	2.16855445	2.031087
95	0.63933182	4.87517500	3.11685451		95.00000000	0.36147368	1.76224747	2.052477
96	0.64911348	3.59770180	2.33531674		96.00000000	0.35770833	1.28692791	2.073870
97	0.65913111	1.95652600	1.28960715		97.00000000	0.35402062	0.69265054	2.095220
98	0.66893059	0.03688183	0.02467139		98.00000000	0.35040816	0.01292370	2.116709
99	0.67905611	-2.33560850	-1.58600922		99.00000000	0.34686869	-0.81014945	2.138082
100	0.68876040	-5.02627370	-3.46189828		100.00000000	0.34340000	-1.72602239	2.159466
101	0.69902432	-8.28233810	-5.78955576		101.00000000	0.34000000	-2.81599495	2.180961
03:22 04/04/2018
Test Lot:	JK-PERC
Recipe:	Recipe_YJX-LID
Cell Name:	3-6-4h
Test Order:	3
Test Condition:	Light
1	-0.29997441	9.09646510	-2.72870675		1.00000000	34.34000000	312.37261153	0.000000
2	-0.29012996	9.09733300	-2.63940886		2.00000000	17.17000000	156.20120761	0.021594
3	-0.28000194	9.12934210	-2.55623350		3.00000000	11.44666667	104.50053590	0.042975
4	-0.27021626	9.08811950	-2.45575766		4.00000000	8.58500000	78.02150591	0.064345
5	-0.26006815	9.11310390	-2.37002807		5.00000000	6.86800000	62.58879759	0.085725
6	-0.24991481	9.11569600	-2.27814743		6.00000000	5.72333333	52.17216677	0.107213
7	-0.24010609	9.09596160	-2.18399577		7.00000000	4.90571429	44.62218876	0.128609
8	-0.22995126	9.11139870	-2.09517761		8.00000000	4.29250000	39.11067892	0.149955
9	-0.22013658	9.10247520	-2.00378776		9.00000000	3.81555556	34.73099982	0.171321
10	-0.20999070	9.10255340	-1.91145156		10.00000000	3.43400000	31.25816838	0.192841
11	-0.20017451	9.10686590	-1.82296242		11.00000000	3.12181818	28.42997955	0.214240
12	-0.19003756	9.09710310	-1.72879128		12.00000000	2.86166667	26.03287670	0.235589
13	-0.18023925	9.11076070	-1.64211668		13.00000000	2.64153846	24.06642480	0.256969
14	-0.17009410	9.11509990	-1.55042471		14.00000000	2.45285714	22.35803790	0.278452
15	-0.16026603	9.10051060	-1.45850270		15.00000000	2.28933333	20.83410227	0.299824
16	-0.15009482	9.10866830	-1.36716393		16.00000000	2.14625000	19.54947934	0.321182
17	-0.13996606	9.09939380	-1.27360630		17.00000000	2.02000000	18.38077548	0.342558
18	-0.13015807	9.11384010	-1.18623984		18.00000000	1.90777778	17.38718161	0.364044
19	-0.12000176	9.10041240	-1.09206550		19.00000000	1.80736842	16.44779799	0.385427
20	-0.11016996	9.10665700	-1.00328004		20.00000000	1.71700000	15.63613007	0.406768
21	-0.10001142	9.10190770	-0.91029471		21.00000000	1.63523810	14.88378621	0.428147
22	-0.09022427	9.10447600	-0.82144474		22.00000000	1.56090909	14.21125936	0.449634
23	-0.08006796	9.10542580	-0.72905289		23.00000000	1.49304348	13.59479661	0.471012
24	-0.07019969	9.10188390	-0.63894944		24.00000000	1.43083333	13.02327888	0.492404
25	-0.06007539	9.11093620	-0.54734302		25.00000000	1.37360000	12.51478196	0.513751
26	-0.04990866	9.11045070	-0.45469039		26.00000000	1.32076923	12.03280296	0.535229
27	-0.04011928	9.08471490	-0.36447221		27.00000000	1.27185185	11.55441147	0.556616
28	-0.02993097	9.10488800	-0.27251811		28.00000000	1.22642857	11.16649478	0.577994
29	-0.02012968	9.11031720	-0.18338776		29.00000000	1.18413793	10.78787216	0.599411
30	-0.00996816	9.09065250	-0.09061709		30.00000000	1.14466667	10.40576690	0.620884
31	-0.00070275	9.11033540	-0.00640225		31.00000000	1.10774194	10.09190057	0.642374
32	0.00943847	9.09389210	0.08583243		32.00000000	1.07312500	9.75888296	0.663761
33	0.01926404	9.10569950	0.17541257		33.00000000	1.04060606	9.47544609	0.685110
34	0.02939103	9.08890340	0.26713225		34.00000000	1.01000000	9.17979243	0.706632
35	0.03921065	9.10997960	0.35720819		35.00000000	0.98114286	8.93819141	0.728028
36	0.04936369	9.10189910	0.44930331		36.00000000	0.95388889	8.68220042	0.749394
37	0.05918479	9.09551240	0.53831602		37.00000000	0.92810811	8.44161881	0.770747
38	0.06936016	9.09659190	0.63094106		38.00000000	0.90368421	8.22044647	0.792216
39	0.07945590	9.09800530	0.72289017		39.00000000	0.88051282	8.01091031	0.813588
40	0.08929412	9.10460470	0.81298767		40.00000000	0.85850000	7.81630313	0.834971
41	0.09942929	9.08374500	0.90319035		41.00000000	0.83756098	7.60819032	0.856339
42	0.10924966	9.10995010	0.99525895		42.00000000	0.81761905	7.44846872	0.877819
43	0.11942279	9.09866330	1.08658776		43.00000000	0.79860465	7.26623483	0.899192
44	0.12920967	9.10097790	1.17593435		44.00000000	0.78045455	7.10289957	0.920576
45	0.13935898	9.10547540	1.26892976		45.00000000	0.76311111	6.94848945	0.942070
46	0.14918754	9.10508350	1.35836501		46.00000000	0.74652174	6.79714277	0.963475
47	0.15931749	9.09444430	1.44890404		47.00000000	0.73063830	6.64474930	0.984833
48	0.16958411	9.10910990	1.54476030		48.00000000	0.71541667	6.51680904	1.006212
49	0.17940357	9.10513970	1.63349457		49.00000000	0.70081633	6.38103056	1.067894
50	0.18955274	9.10705180	1.72626662		50.00000000	0.68680000	6.25472318	1.089320
51	0.19931714	9.10298350	1.81438064		51.00000000	0.67333333	6.12934222	1.110804
52	0.20946407	9.10264970	1.90667805		52.00000000	0.66038462	6.01124982	1.132171
53	0.21929544	9.09940810	1.99545870		53.00000000	0.64792453	5.89572970	1.153527
54	0.22948703	9.10127070	2.08862358		54.00000000	0.63592593	5.78773400	1.174896
55	0.23930724	9.10086730	2.17790344		55.00000000	0.62436364	5.68225060	1.196383
56	0.24946013	9.09783460	2.26954700		56.00000000	0.61321429	5.57892215	1.217778
57	0.25962493	9.09770110	2.36199001		57.00000000	0.60245614	5.48096589	1.239129
58	0.26943323	9.10244560	2.45250132		58.00000000	0.59206897	5.38927555	1.260512
59	0.27955040	9.08802800	2.54056186		59.00000000	0.58203390	5.28954036	1.282003
60	0.28941303	9.09888080	2.63333466		60.00000000	0.57233333	5.20759278	1.303382
61	0.29956293	9.09060670	2.72320878		61.00000000	0.56295082	5.11756449	1.324739
62	0.30936974	9.09345050	2.81323842		62.00000000	0.55387097	5.03659823	1.346106
63	0.31952488	9.10089680	2.90796296		63.00000000	0.54507937	4.96071105	1.367581
64	0.32931679	9.09871100	2.99635830		64.00000000	0.53656250	4.88202712	1.388978
65	0.33950022	9.10561850	3.09135948		65.00000000	0.52830769	4.81056830	1.410329
66	0.34927800	9.09516910	3.17674247		66.00000000	0.52030303	4.73224404	1.431701
67	0.35943758	9.09503560	3.26909759		67.00000000	0.51253731	4.66154511	1.453185
68	0.36960462	9.09384730	3.36112798		68.00000000	0.50500000	4.59239289	1.474566
69	0.37945011	9.08207510	3.44619440		69.00000000	0.49768116	4.51997767	1.495970
70	0.38952935	9.11245060	3.54956696		70.00000000	0.49057143	4.47030791	1.517330
71	0.39937484	9.10021780	3.63439803		71.00000000	0.48366197	4.40142929	1.538807
72	0.40951434	9.08137420	3.71895296		72.00000000	0.47694444	4.33131097	1.560184
73	0.41931891	9.08879570	3.81110391		73.00000000	0.47041096	4.27546910	1.581572
74	0.42949638	9.09448530	3.90604851		74.00000000	0.46405405	4.22033277	1.602932
75	0.43928161	9.07286260	3.98554169		75.00000000	0.45786667	4.15416136	1.624404
76	0.44946650	9.09884450	4.08962579		76.00000000	0.45184211	4.11124105	1.645771
77	0.45961639	9.07297330	4.17008723		77.00000000	0.44597403	4.04631043	1.667144
78	0.46945521	9.06729890	4.25669071		78.00000000	0.44025641	3.99193646	1.688651
79	0.47959620	9.07240200	4.35108952		79.00000000	0.43468354	3.94362386	1.710032
80	0.48942682	9.05934620	4.43388700		80.00000000	0.42925000	3.88872436	1.731378
81	0.49951199	9.05109690	4.52113142		81.00000000	0.42395062	3.83721812	1.752767
82	0.50938803	9.02649210	4.59798703		82.00000000	0.41878049	3.78011876	1.774245
83	0.51949698	8.99223140	4.67143706		83.00000000	0.41373494	3.72040032	1.795625
84	0.52927852	8.97641850	4.75102550		84.00000000	0.40880952	3.66964537	1.816979
85	0.53941727	8.90751270	4.80486618		85.00000000	0.40400000	3.59863513	1.838354
86	0.54954779	8.85525230	4.86638433		86.00000000	0.39930233	3.53592284	1.859828
87	0.55940747	8.74437050	4.89166618		87.00000000	0.39471264	3.45151360	1.881211
88	0.56953877	8.62201790	4.91057347		88.00000000	0.39022727	3.36454653	1.902560
89	0.57935822	8.41979500	4.87807744		89.00000000	0.38584270	3.24871641	1.923934
90	0.58948731	8.17431640	4.81865579		90.00000000	0.38155556	3.11895584	1.945429
91	0.59930009	7.82563920	4.68990628		91.00000000	0.37736264	2.95310385	1.966814
92	0.60940385	7.33614300	4.47067379		92.00000000	0.37326087	2.73829512	1.988285
93	0.61920768	6.73434590	4.16995870		93.00000000	0.36924731	2.48663912	2.009679
94	0.62927425	5.89979980	3.71259209		94.00000000	0.36531915	2.15530984	2.031169
95	0.63942116	4.84623380	3.09878444		95.00000000	0.36147368	1.75178599	2.052560
96	0.64923024	3.56543560	2.31478861		96.00000000	0.35770833	1.27538603	2.073907
97	0.65928489	1.92486190	1.26903237		97.00000000	0.35402062	0.68144080	2.095299
98	0.66901654	0.02265716	0.01515801		98.00000000	0.35040816	0.00793925	2.116790
99	0.67915154	-2.30785250	-1.56738158		99.00000000	0.34686869	-0.80052177	2.138169
100	0.68883556	-4.96915960	-3.42293384		100.00000000	0.34340000	-1.70640941	2.159525
101	0.69912314	-8.17516800	-5.71544912		101.00000000	0.34000000	-2.77955712	2.180888
03:23 04/04/2018
Test Lot:	JK-PERC
Recipe:	Recipe_YJX-LID
Cell Name:	3-6-4h
Test Order:	4
Test Condition:	Light
1	-0.29995257	9.10035230	-2.72967406		1.00000000	34.34000000	312.50609798	0.000000
2	-0.29011121	9.11831950	-2.64532670		2.00000000	17.17000000	156.56154582	0.061796
3	-0.27995652	9.10481640	-2.54895271		3.00000000	11.44666667	104.21979839	0.083215
4	-0.27013898	9.10616020	-2.45992883		4.00000000	8.58500000	78.17638532	0.104715
5	-0.25999248	9.09271720	-2.36403809		5.00000000	6.86800000	62.44878173	0.126095
6	-0.24982888	9.11228180	-2.27651116		6.00000000	5.72333333	52.15262617	0.147498
7	-0.24002251	9.09879880	-2.18391653		7.00000000	4.90571429	44.63610726	0.168896
8	-0.22986856	9.10398390	-2.09271967		8.00000000	4.29250000	39.07885089	0.190394
9	-0.22002944	9.10228540	-2.00277076		9.00000000	3.81555556	34.73027563	0.211774
10	-0.20987849	9.10336300	-1.91060008		10.00000000	3.43400000	31.26094854	0.233131
11	-0.20006318	9.10103030	-1.82078106		11.00000000	3.12181818	28.41176186	0.254496
12	-0.18989956	9.10044570	-1.72817063		12.00000000	2.86166667	26.04244211	0.275972
13	-0.18015125	9.10455320	-1.64019664		13.00000000	2.64153846	24.05002745	0.297359
14	-0.16996828	9.09949110	-1.54662485		14.00000000	2.45285714	22.31975174	0.318731
15	-0.16016415	9.09889030	-1.45731603		15.00000000	2.28933333	20.83039286	0.340083
16	-0.14999680	9.11336990	-1.36697632		16.00000000	2.14625000	19.55957015	0.361559
17	-0.13985850	9.09629730	-1.27219450		17.00000000	2.02000000	18.37452055	0.382939
18	-0.13008189	9.10778430	-1.18475780		18.00000000	1.90777778	17.37562849	0.404328
19	-0.11992721	9.08985330	-1.09012075		19.00000000	1.80736842	16.42871381	0.425748
20	-0.11011266	9.10723970	-1.00282239		20.00000000	1.71700000	15.63713056	0.447209
21	-0.09995723	9.10985850	-0.91059620		21.00000000	1.63523810	14.89678766	0.468584
22	-0.09010248	9.10633370	-0.82050324		22.00000000	1.56090909	14.21415906	0.489996
23	-0.08000064	9.10343840	-0.72828089		23.00000000	1.49304348	13.59182933	0.511350
24	-0.07014515	9.11207680	-0.63916795		24.00000000	1.43083333	13.03786322	0.532843
25	-0.06002396	9.09891700	-0.54615299		25.00000000	1.37360000	12.49827239	0.554226
26	-0.04985067	9.10113050	-0.45369741		26.00000000	1.32076923	12.02049313	0.575598
27	-0.04004057	9.09046940	-0.36398759		27.00000000	1.27185185	11.56173034	0.596968
28	-0.02989184	9.09615330	-0.27190079		28.00000000	1.22642857	11.15578230	0.618448
29	-0.02008696	9.11153410	-0.18302303		29.00000000	1.18413793	10.78931314	0.639849
30	-0.00994344	9.09435750	-0.09042919		30.00000000	1.14466667	10.41000789	0.661233
31	-0.00066326	9.10258200	-0.00603739		31.00000000	1.10774194	10.08331180	0.682700
32	0.00948377	9.11477850	0.08644248		32.00000000	1.07312500	9.78129668	0.704176
33	0.01929210	9.09024430	0.17536987		33.00000000	1.04060606	9.45936331	0.725548
34	0.02945617	9.09211440	0.26781884		34.00000000	1.01000000	9.18303554	0.746935
35	0.03928980	9.09563450	0.35736561		35.00000000	0.98114286	8.92411682	0.768424
36	0.04942409	9.09671780	0.44959703		36.00000000	0.95388889	8.67725803	0.789813
37	0.05922944	9.10583780	0.53933368		37.00000000	0.92810811	8.45120189	0.811162
38	0.06938979	9.09959320	0.63141886		38.00000000	0.90368421	8.22315870	0.832549
39	0.07954121	9.10629560	0.72432573		39.00000000	0.88051282	8.01821002	0.854032
40	0.08937112	9.08568950	0.81199820		40.00000000	0.85850000	7.80006444	0.875415
41	0.09950765	9.11004070	0.90651870		41.00000000	0.83756098	7.63021458	0.896769
42	0.10933755	9.10088830	0.99506883		42.00000000	0.81761905	7.44105962	0.918135
43	0.11947557	9.10801120	1.08818483		43.00000000	0.79860465	7.27370011	0.939620
44	0.12926753	9.07708840	1.17337280		44.00000000	0.78045455	7.08425490	0.960992
45	0.13947253	9.11606500	1.27144065		45.00000000	0.76311111	6.95657049	0.982344
46	0.14926820	9.08535770	1.35615499		46.00000000	0.74652174	6.78241703	1.003724
47	0.15943897	9.10790730	1.45215536		47.00000000	0.73063830	6.65458589	1.025198
48	0.16956732	9.09429740	1.54209564		48.00000000	0.71541667	6.50621193	1.046575
49	0.17935778	9.09927750	1.63202621		49.00000000	0.70081633	6.37692223	1.067936
50	0.18953748	9.09991360	1.72477469		50.00000000	0.68680000	6.24982066	1.089317
51	0.19932497	9.10078620	1.81401394		51.00000000	0.67333333	6.12786271	1.110803
52	0.20944065	9.10549260	1.90706029		52.00000000	0.66038462	6.01312723	1.132189
53	0.21925791	9.10026260	1.99530456		53.00000000	0.64792453	5.89628335	1.153542
54	0.22941230	9.09735680	2.08704555		54.00000000	0.63592593	5.78524505	1.174932
55	0.23919235	9.09426780	2.17527929		55.00000000	0.62436364	5.67813011	1.196413
56	0.24938619	9.11426640	2.27297217		56.00000000	0.61321429	5.58899836	1.217788
57	0.25954801	9.09562780	2.36075210		57.00000000	0.60245614	5.47971682	1.239153
58	0.26934370	9.11006550	2.45373875		58.00000000	0.59206897	5.39378706	1.260516
59	0.27949065	9.10260580	2.54409321		59.00000000	0.58203390	5.29802514	1.281987
60	0.28932205	9.10303310	2.63370820		60.00000000	0.57233333	5.20996928	1.303378
61	0.29946527	9.09248350	2.72288303		61.00000000	0.56295082	5.11862104	1.324760
62	0.30930486	9.09528920	2.81321715		62.00000000	0.55387097	5.03761663	1.346095
63	0.31941831	9.10207650	2.90736989		63.00000000	0.54507937	4.96135408	1.367562
64	0.32926163	9.09213450	2.99369103		64.00000000	0.53656250	4.87849842	1.388951
65	0.33941454	9.09363370	3.08651150		65.00000000	0.52830769	4.80423663	1.410359
66	0.34923103	9.09413050	3.17595256		66.00000000	0.52030303	4.73170366	1.431851
67	0.35938096	9.09922410	3.27008789		67.00000000	0.51253731	4.66369187	1.453223
68	0.36953983	9.09680270	3.36163092		68.00000000	0.50500000	4.59388536	1.474574
69	0.37939504	9.10209180	3.45328848		69.00000000	0.49768116	4.52993960	1.495960
70	0.38952711	9.09551240	3.54294866		70.00000000	0.49057143	4.46199851	1.517438
71	0.39934808	9.09146880	3.63066061		71.00000000	0.48366197	4.39719773	1.538830
72	0.40949950	9.09104160	3.72277699		72.00000000	0.47694444	4.33592179	1.560181
73	0.41932493	9.09489540	3.81371638		73.00000000	0.47041096	4.27833847	1.581554
74	0.42946669	9.08348660	3.90105492		74.00000000	0.46405405	4.21522878	1.603047
75	0.43926534	9.09381680	3.99459853		75.00000000	0.45786667	4.16375559	1.624416
76	0.44943088	9.07862190	4.08021303		76.00000000	0.45184211	4.10210363	1.645771
77	0.45957041	9.08116820	4.17343619		77.00000000	0.44597403	4.04996514	1.667151
78	0.46943825	9.06844140	4.25707326		78.00000000	0.44025641	3.99243946	1.688633
79	0.47958520	9.07170100	4.35065354		79.00000000	0.43468354	3.94331914	1.710013
80	0.48937196	9.06875510	4.43799446		80.00000000	0.42925000	3.89276313	1.731375
81	0.49952412	9.02544210	4.50842602		81.00000000	0.42395062	3.82634175	1.752745
82	0.50936222	9.03572750	4.60245822		82.00000000	0.41878049	3.78398637	1.774280
83	0.51948833	9.00973990	4.68045473		83.00000000	0.41373494	3.72764419	1.795663
84	0.52925569	8.95742990	4.74077074		84.00000000	0.40880952	3.66188265	1.817010
85	0.53941232	8.91727920	4.81009026		85.00000000	0.40400000	3.60258080	1.838385
86	0.54953176	8.85830690	4.86792098		86.00000000	0.39930233	3.53714255	1.859864
87	0.55936313	8.75128750	4.89514757		87.00000000	0.39471264	3.45424382	1.881240
88	0.56949222	8.63211440	4.91592199		88.00000000	0.39022727	3.36848646	1.902623
89	0.57929015	8.42736720	4.88189081		89.00000000	0.38584270	3.25163809	1.924003
90	0.58943337	8.17230420	4.81702881		90.00000000	0.38155556	3.11818807	1.945476
91	0.59922308	7.83615490	4.69560487		91.00000000	0.37736264	2.95707208	1.966858
92	0.60935813	7.35911180	4.48433460		92.00000000	0.37326087	2.74686847	1.988343
93	0.61911511	6.73498110	4.16972856		93.00000000	0.36924731	2.48687367	2.009729
94	0.62923974	5.92217830	3.72646993		94.00000000	0.36531915	2.16348514	2.031215
95	0.63938743	4.85495330	3.10419611		95.00000000	0.36147368	1.75493786	2.052591
96	0.64916080	3.57555080	2.32110742		96.00000000	0.35770833	1.27900432	2.073968
97	0.65921319	1.93727250	1.27707558		97.00000000	0.35402062	0.68583441	2.095454
98	0.66899848	0.01913684	0.01280252		98.00000000	0.35040816	0.00670570	2.116844
99	0.67907470	-2.32806180	-1.58092787		99.00000000	0.34686869	-0.80753174	2.138268
100	0.68879747	-5.00542780	-3.44772600		100.00000000	0.34340000	-1.71886391	2.159661
101	0.69904339	-8.22812750	-5.75181814		101.00000000	0.34000000	-2.79756335	2.181149
