# Supplementary material for: Study on the Electrical Injection Regeneration of Industrialized B-Doped Czochralski Silicon PERC Solar Cells
Source: Hindawi journal article supplement (doi:10.1155/2019/5357370), 2019-06-20
Supplement: f1 [file 5357370.f1.zip › section3.3/IVRawData_3-6-5h.csv]

04:24 04/04/2018
Test Lot:	JK-PERC
Recipe:	Recipe_YJX-LID
Cell Name:	3-6-5h
Test Order:	2
Test Condition:	Light
1	-0.29988295	9.10868170	-2.73153834		1.00000000	34.34000000	312.79212958	0.000000
2	-0.29010105	9.10059450	-2.64009202		2.00000000	17.17000000	156.25720757	0.061787
3	-0.27995226	9.10522170	-2.54902739		3.00000000	11.44666667	104.22443773	0.083179
4	-0.27012867	9.10190580	-2.45868571		4.00000000	8.58500000	78.13986129	0.104567
5	-0.25998878	9.11343960	-2.36939204		5.00000000	6.86800000	62.59110317	0.126074
6	-0.24981169	9.10128690	-2.27360786		6.00000000	5.72333333	52.08969869	0.147510
7	-0.23998067	9.09970280	-2.18375277		7.00000000	4.90571429	44.64054202	0.168910
8	-0.22988470	9.10368630	-2.09279819		8.00000000	4.29250000	39.07757344	0.190271
9	-0.22001052	9.11386200	-2.00514552		9.00000000	3.81555556	34.77444679	0.211750
10	-0.20988849	9.09709930	-1.90937644		10.00000000	3.43400000	31.23943900	0.233146
11	-0.20006120	9.10500140	-1.82155751		11.00000000	3.12181818	28.42415892	0.254538
12	-0.18995406	9.10451600	-1.72943978		12.00000000	2.86166667	26.05408995	0.275991
13	-0.18014462	9.09656050	-1.63869643		13.00000000	2.64153846	24.02891443	0.297441
14	-0.16998316	9.11936950	-1.55013924		14.00000000	2.45285714	22.36851062	0.318820
15	-0.16019160	9.09424210	-1.45682119		15.00000000	2.28933333	20.81975158	0.340199
16	-0.15001151	9.10219100	-1.36543342		16.00000000	2.14625000	19.53557743	0.361548
17	-0.13984782	9.10612680	-1.27347198		17.00000000	2.02000000	18.39437614	0.383056
18	-0.13007261	9.10654540	-1.18451213		18.00000000	1.90777778	17.37326495	0.404433
19	-0.11993645	9.10890870	-1.09249017		19.00000000	1.80736842	16.46315393	0.425807
20	-0.11011957	9.10598950	-1.00274765		20.00000000	1.71700000	15.63498397	0.447172
21	-0.09992759	9.11347100	-0.91068718		21.00000000	1.63523810	14.90269496	0.468642
22	-0.09013974	9.09802250	-0.82009337		22.00000000	1.56090909	14.20118603	0.490031
23	-0.07998943	9.10175040	-0.72804385		23.00000000	1.49304348	13.58930908	0.511417
24	-0.07012195	9.10832120	-0.63869325		24.00000000	1.43083333	13.03248958	0.532774
25	-0.05998728	9.09973340	-0.54586823		25.00000000	1.37360000	12.49939380	0.554247
26	-0.04986525	9.10848330	-0.45419682		26.00000000	1.32076923	12.03020448	0.575627
27	-0.04006922	9.10358140	-0.36477340		27.00000000	1.27185185	11.57840686	0.597008
28	-0.02990179	9.09625340	-0.27199429		28.00000000	1.22642857	11.15590506	0.618513
29	-0.02011320	9.10531520	-0.18313704		29.00000000	1.18413793	10.78194910	0.639894
30	-0.00995099	9.10844610	-0.09063803		30.00000000	1.14466667	10.42613464	0.661246
31	-0.00065808	9.10148050	-0.00598947		31.00000000	1.10774194	10.08209162	0.682748
32	0.00948458	9.10962770	0.08640099		32.00000000	1.07312500	9.77576923	0.704241
33	0.01927587	9.11028390	0.17560865		33.00000000	1.04060606	9.48021664	0.725628
34	0.02942737	9.10240170	0.26785978		34.00000000	1.01000000	9.19342572	0.746986
35	0.03926332	9.09741500	0.35719471		35.00000000	0.98114286	8.92586375	0.768361
36	0.04941110	9.10625360	0.44995003		36.00000000	0.95388889	8.68635413	0.789853
37	0.05924184	9.10635380	0.53947715		37.00000000	0.92810811	8.45168080	0.811222
38	0.06937027	9.09787370	0.63112195		38.00000000	0.90368421	8.22160481	0.832561
39	0.07953443	9.11278340	0.72478000		39.00000000	0.88051282	8.02392261	0.853953
40	0.08936591	9.10308070	0.81350506		40.00000000	0.85850000	7.81499478	0.875455
41	0.09950253	9.09916210	0.90538961		41.00000000	0.83756098	7.62110309	0.896843
42	0.10931987	9.10257340	0.99509214		42.00000000	0.81761905	7.44243739	0.918209
43	0.11946393	9.10979460	1.08829186		43.00000000	0.79860465	7.27512434	0.939591
44	0.12926862	9.10272030	1.17669609		44.00000000	0.78045455	7.10425943	0.961069
45	0.13943426	9.10377500	1.26937813		45.00000000	0.76311111	6.94719186	0.982461
46	0.14924937	9.10478310	1.35888314		46.00000000	0.74652174	6.79691851	1.003826
47	0.15938747	9.10094450	1.45057652		47.00000000	0.73063830	6.64949860	1.025205
48	0.16955237	9.09554390	1.54217102		48.00000000	0.71541667	6.50710370	1.046687
49	0.17938758	9.08979800	1.63059687		49.00000000	0.70081633	6.37027884	1.068062
50	0.18952420	9.10438060	1.72550045		50.00000000	0.68680000	6.25288860	1.089437
51	0.19930582	9.09606840	1.81289937		51.00000000	0.67333333	6.12468606	1.110799
52	0.20943499	9.09890370	1.90562881		52.00000000	0.66038462	6.00877602	1.132277
53	0.21923745	9.10964110	1.99717449		53.00000000	0.64792453	5.90235991	1.153669
54	0.22939268	9.09089280	2.08538426		54.00000000	0.63592593	5.78113442	1.175092
55	0.23925169	9.10266020	2.17782684		55.00000000	0.62436364	5.68337002	1.196457
56	0.24936748	9.09970950	2.26917163		56.00000000	0.61321429	5.58007186	1.217923
57	0.25952715	9.10011860	2.36172784		57.00000000	0.60245614	5.48242233	1.239309
58	0.26934376	9.09048750	2.44846608		58.00000000	0.59206897	5.38219553	1.260692
59	0.27946401	9.10473440	2.54444559		59.00000000	0.58203390	5.29926406	1.282183
60	0.28934014	9.10457610	2.63431932		60.00000000	0.57233333	5.21085239	1.303562
61	0.29943880	9.09529210	2.72348335		61.00000000	0.56295082	5.12020214	1.324927
62	0.30925390	9.10093120	2.81449847		62.00000000	0.55387097	5.04074157	1.346298
63	0.31941956	9.10757540	2.90913773		63.00000000	0.54507937	4.96435142	1.367776
64	0.32922274	9.10088160	2.99621718		64.00000000	0.53656250	4.88319178	1.389161
65	0.33940402	9.09610460	3.08725447		65.00000000	0.52830769	4.80554203	1.410508
66	0.34922507	9.09593490	3.17652850		66.00000000	0.52030303	4.73264249	1.431880
67	0.35935798	9.09511660	3.26840273		67.00000000	0.51253731	4.66158663	1.453385
68	0.36952734	9.09640880	3.36137175		68.00000000	0.50500000	4.59368644	1.474760
69	0.37934396	9.09299560	3.44937296		69.00000000	0.49768116	4.52541259	1.496108
70	0.38950586	9.09465980	3.54242329		70.00000000	0.49057143	4.46158025	1.517492
71	0.39933586	9.09500500	3.63196164		71.00000000	0.48366197	4.39890805	1.538969
72	0.40947843	9.09239010	3.72313762		72.00000000	0.47694444	4.33656494	1.560349
73	0.41927418	9.08822250	3.81045704		73.00000000	0.47041096	4.27519946	1.581700
74	0.42946514	9.09593110	3.90638532		74.00000000	0.46405405	4.22100370	1.603097
75	0.43928844	9.07639030	3.98715334		75.00000000	0.45786667	4.15577657	1.624595
76	0.44941986	9.08555410	4.08322845		76.00000000	0.45184211	4.10523589	1.645983
77	0.45956615	9.07823280	4.17204850		77.00000000	0.44597403	4.04865603	1.667326
78	0.46941251	9.08303930	4.26369228		78.00000000	0.44025641	3.99886628	1.688711
79	0.47957441	9.06547260	4.34756867		79.00000000	0.43468354	3.94061176	1.710199
80	0.48936200	9.05986310	4.43355273		80.00000000	0.42925000	3.88894624	1.731573
81	0.49950010	9.04567430	4.51831522		81.00000000	0.42395062	3.83491920	1.752946
82	0.50930703	9.02886010	4.59846192		82.00000000	0.41878049	3.78111044	1.774314
83	0.51944959	9.00301930	4.67661468		83.00000000	0.41373494	3.72486365	1.795784
84	0.52925575	8.96303560	4.74373813		84.00000000	0.40880952	3.66417432	1.817167
85	0.53939837	8.91640570	4.80949470		85.00000000	0.40400000	3.60222790	1.838560
86	0.54955137	8.84520910	4.86089678		86.00000000	0.39930233	3.53191256	1.859927
87	0.55933666	8.74781610	4.89297424		87.00000000	0.39471264	3.45287362	1.881414
88	0.56946808	8.61819650	4.90778781		88.00000000	0.39022727	3.36305532	1.902790
89	0.57926834	8.40786930	4.87041249		89.00000000	0.38584270	3.24411496	1.924188
90	0.58939451	8.16213230	4.81071597		90.00000000	0.38155556	3.11430692	1.945678
91	0.59919548	7.81550220	4.68301359		91.00000000	0.37736264	2.94927852	1.967050
92	0.60931867	7.31604860	4.45780500		92.00000000	0.37326087	2.73079466	1.988519
93	0.61914349	6.71397730	4.15691534		93.00000000	0.36924731	2.47911807	2.009916
94	0.62921089	5.86978530	3.69333283		94.00000000	0.36531915	2.14434497	2.031399
95	0.63936090	4.81072190	3.07578748		95.00000000	0.36147368	1.73894937	2.052783
96	0.64913136	3.53495550	2.29465047		96.00000000	0.35770833	1.26448304	2.074126
97	0.65923226	1.90618550	1.25661898		97.00000000	0.35402062	0.67482897	2.095492
98	0.66896397	0.01009330	0.00675206		98.00000000	0.35040816	0.00353678	2.116980
99	0.67907012	-2.29901000	-1.56118900		99.00000000	0.34686869	-0.79745458	2.138420
100	0.68880856	-4.91708800	-3.38693230		100.00000000	0.34340000	-1.68852802	2.159781
101	0.69902110	-8.04884910	-5.62631535		101.00000000	0.34000000	-2.73660869	2.181172
04:24 04/04/2018
Test Lot:	JK-PERC
Recipe:	Recipe_YJX-LID
Cell Name:	3-6-5h
Test Order:	3
Test Condition:	Light
1	-0.29989451	9.11162950	-2.73252766		1.00000000	34.34000000	312.89335703	0.000000
2	-0.29012823	9.09754750	-2.63945535		2.00000000	17.17000000	156.20489058	0.061796
3	-0.28000095	9.11214350	-2.55140884		3.00000000	11.44666667	104.30366926	0.083224
4	-0.27019075	9.11502270	-2.46279482		4.00000000	8.58500000	78.25246988	0.104663
5	-0.25999647	9.10878750	-2.36825260		5.00000000	6.86800000	62.55915255	0.126141
6	-0.24981636	9.09448340	-2.27195074		6.00000000	5.72333333	52.05075999	0.147572
7	-0.24003518	9.10948850	-2.18659771		7.00000000	4.90571429	44.68854787	0.168971
8	-0.22991088	9.09723760	-2.09155390		8.00000000	4.29250000	39.04989240	0.190318
9	-0.22003740	9.11373420	-2.00536238		9.00000000	3.81555556	34.77395916	0.211812
10	-0.20992279	9.11594580	-1.91364478		10.00000000	3.43400000	31.30415788	0.233183
11	-0.20004335	9.08850380	-1.81809475		11.00000000	3.12181818	28.37265641	0.254556
12	-0.18990640	9.10467240	-1.72903556		12.00000000	2.86166667	26.05453752	0.275917
13	-0.18011779	9.10639100	-1.64022302		13.00000000	2.64153846	24.05488207	0.297401
14	-0.17000838	9.10308840	-1.54760131		14.00000000	2.45285714	22.32857540	0.318770
15	-0.16017807	9.10535810	-1.45847869		15.00000000	2.28933333	20.84519981	0.340148
16	-0.15003590	9.10084060	-1.36545281		16.00000000	2.14625000	19.53267914	0.361480
17	-0.13988258	9.09574890	-1.27233682		17.00000000	2.02000000	18.37341278	0.382950
18	-0.13004856	9.10769940	-1.18444319		18.00000000	1.90777778	17.37546652	0.404323
19	-0.11988332	9.09481240	-1.09031631		19.00000000	1.80736842	16.43767673	0.425701
20	-0.11008502	9.10001090	-1.00177488		20.00000000	1.71700000	15.62471872	0.447200
21	-0.09993170	9.09841060	-0.90921966		21.00000000	1.63523810	14.87806762	0.468573
22	-0.09008874	9.10533810	-0.82028844		22.00000000	1.56090909	14.21260502	0.489925
23	-0.07997189	9.10143950	-0.72785929		23.00000000	1.49304348	13.58884489	0.511310
24	-0.07011850	9.11001400	-0.63878053		24.00000000	1.43083333	13.03491170	0.532784
25	-0.06000612	9.09903140	-0.54599756		25.00000000	1.37360000	12.49842953	0.554171
26	-0.04985652	9.10026450	-0.45370749		26.00000000	1.32076923	12.01934934	0.575513
27	-0.04006119	9.09568500	-0.36438397		27.00000000	1.27185185	11.56836381	0.596886
28	-0.02989745	9.09625910	-0.27195495		28.00000000	1.22642857	11.15591205	0.618391
29	-0.02004705	9.11182020	-0.18266508		29.00000000	1.18413793	10.78965192	0.639776
30	-0.00994582	9.10412980	-0.09054806		30.00000000	1.14466667	10.42119391	0.661126
31	-0.00065660	9.09753420	-0.00597343		31.00000000	1.10774194	10.07772014	0.682616
32	0.00946377	9.11488910	0.08626120		32.00000000	1.07312500	9.78141537	0.704102
33	0.01927445	9.08507630	0.17510980		33.00000000	1.04060606	9.45398546	0.725473
34	0.02938506	9.11911770	0.26796578		34.00000000	1.01000000	9.21030888	0.746856
35	0.03923890	9.09458540	0.35686153		35.00000000	0.98114286	8.92308750	0.768227
36	0.04939193	9.09562020	0.44925026		36.00000000	0.95388889	8.67621105	0.789703
37	0.05921749	9.09578700	0.53862971		37.00000000	0.92810811	8.44187366	0.811096
38	0.06933778	9.11256790	0.63184521		38.00000000	0.90368421	8.23488373	0.832436
39	0.07950197	9.09820840	0.72332551		39.00000000	0.88051282	8.01108914	0.853812
40	0.08931860	9.11434360	0.81408044		40.00000000	0.85850000	7.82466398	0.875292
41	0.09949546	9.09736920	0.90514690		41.00000000	0.83756098	7.61960142	0.896672
42	0.10929274	9.10639480	0.99526284		42.00000000	0.81761905	7.44556184	0.918051
43	0.11948372	9.10180660	1.08751771		43.00000000	0.79860465	7.26874508	0.939455
44	0.12927729	9.09676840	1.17600557		44.00000000	0.78045455	7.09961425	0.960945
45	0.13942511	9.09357070	1.26787210		45.00000000	0.76311111	6.93940484	0.982342
46	0.14924993	9.09998890	1.35817271		46.00000000	0.74652174	6.79333954	1.003727
47	0.15939999	9.09825520	1.45026179		47.00000000	0.73063830	6.64753369	1.025071
48	0.16957162	9.10611060	1.54413793		48.00000000	0.71541667	6.51466329	1.046543
49	0.17937411	9.10035800	1.63236862		49.00000000	0.70081633	6.37767946	1.067905
50	0.18953384	9.10788630	1.72625266		50.00000000	0.68680000	6.25529631	1.089283
51	0.19931400	9.10097030	1.81395079		51.00000000	0.67333333	6.12798667	1.110762
52	0.20946108	9.09445860	1.90493512		52.00000000	0.66038462	6.00584054	1.132156
53	0.21929260	9.10484600	1.99662535		53.00000000	0.64792453	5.89925305	1.153518
54	0.22938982	9.08360580	2.08368670		54.00000000	0.63592593	5.77650043	1.174894
55	0.23923324	9.10439010	2.17807274		55.00000000	0.62436364	5.68445011	1.196371
56	0.24941157	9.10404970	2.27065533		56.00000000	0.61321429	5.58273333	1.217762
57	0.25952068	9.09528640	2.36041491		57.00000000	0.60245614	5.47951114	1.239108
58	0.26937455	9.10826020	2.45353349		58.00000000	0.59206897	5.39271819	1.260476
59	0.27950376	9.09254930	2.54140172		59.00000000	0.58203390	5.29217191	1.281959
60	0.28930178	9.10322190	2.63357830		60.00000000	0.57233333	5.21007733	1.303333
61	0.29945332	9.09678360	2.72406205		61.00000000	0.56295082	5.12104178	1.324666
62	0.30924466	9.10800650	2.81660237		62.00000000	0.55387097	5.04466037	1.346045
63	0.31943414	9.09440330	2.90506290		63.00000000	0.54507937	4.95717158	1.367538
64	0.32923737	9.09848590	2.99556157		64.00000000	0.53656250	4.88190634	1.388936
65	0.33940306	9.09855940	3.08807890		65.00000000	0.52830769	4.80683892	1.410294
66	0.34924352	9.09686370	3.17702070		66.00000000	0.52030303	4.73312575	1.431666
67	0.35937721	9.08905510	3.26639926		67.00000000	0.51253731	4.65847988	1.453142
68	0.36953768	9.09443190	3.36073527		68.00000000	0.50500000	4.59268811	1.474528
69	0.37935802	9.09967710	3.45203549		69.00000000	0.49768116	4.52873785	1.495871
70	0.38949394	9.09284780	3.54160912		70.00000000	0.49057143	4.46069134	1.517253
71	0.39933884	9.09098910	3.63038504		71.00000000	0.48366197	4.39696571	1.538732
72	0.40945765	9.09087370	3.72232778		72.00000000	0.47694444	4.33584171	1.560100
73	0.41928098	9.09460070	3.81319309		73.00000000	0.47041096	4.27819984	1.581470
74	0.42942137	9.08630280	3.90185260		74.00000000	0.46405405	4.21653565	1.602831
75	0.43922982	9.08096410	3.98863023		75.00000000	0.45786667	4.15787076	1.624309
76	0.44936943	9.10178180	4.09006250		76.00000000	0.45184211	4.11256825	1.645697
77	0.45954928	9.07879920	4.17215564		77.00000000	0.44597403	4.04890863	1.667079
78	0.46941873	9.06885150	4.25708875		78.00000000	0.44025641	3.99262001	1.688421
79	0.47953904	9.06744580	4.34819425		79.00000000	0.43468354	3.94146948	1.709884
80	0.48937798	9.06175040	4.43462111		80.00000000	0.42925000	3.88975636	1.731243
81	0.49949977	9.03234100	4.51165225		81.00000000	0.42395062	3.82926654	1.752619
82	0.50931489	9.03865430	4.60352122		82.00000000	0.41878049	3.78521206	1.774109
83	0.51944935	8.99750420	4.67374771		83.00000000	0.41373494	3.72258186	1.795483
84	0.52925110	8.96107290	4.74265769		84.00000000	0.40880952	3.66337195	1.816837
85	0.53937733	8.92507170	4.81398134		85.00000000	0.40400000	3.60572897	1.838212
86	0.54950875	8.84809210	4.86210403		86.00000000	0.39930233	3.53306375	1.859684
87	0.55934399	8.75816920	4.89882931		87.00000000	0.39471264	3.45696012	1.881079
88	0.56946355	8.62002750	4.90879146		88.00000000	0.39022727	3.36376982	1.902434
89	0.57928538	8.44233610	4.89052188		89.00000000	0.38584270	3.25741373	1.923813
90	0.58942872	8.18112660	4.82219098		90.00000000	0.38155556	3.12155430	1.945317
91	0.59920371	7.83747770	4.69624571		91.00000000	0.37736264	2.95757126	1.966699
92	0.60932618	7.35564140	4.48198488		92.00000000	0.37326087	2.74557311	1.988159
93	0.61910486	6.74774500	4.17756172		93.00000000	0.36924731	2.49158670	2.009573
94	0.62926388	5.92301850	3.72714160		94.00000000	0.36531915	2.16379208	2.031070
95	0.63935363	4.86489820	3.11039032		95.00000000	0.36147368	1.75853268	2.052443
96	0.64916360	3.57729940	2.32225256		96.00000000	0.35770833	1.27962981	2.073799
97	0.65923774	1.92168650	1.26684827		97.00000000	0.35402062	0.68031664	2.095175
98	0.66895163	0.00434755	0.00290830		98.00000000	0.35040816	0.00152342	2.116671
99	0.67907786	-2.37509820	-1.61287660		99.00000000	0.34686869	-0.82384719	2.138072
100	0.68876874	-5.06386420	-3.48783136		100.00000000	0.34340000	-1.73893097	2.159461
101	0.69904977	-8.33472060	-5.82638452		101.00000000	0.34000000	-2.83380500	2.180846
04:24 04/04/2018
Test Lot:	JK-PERC
Recipe:	Recipe_YJX-LID
Cell Name:	3-6-5h
Test Order:	4
Test Condition:	Light
1	-0.29989606	9.08979230	-2.72599290		1.00000000	34.34000000	312.14346758	0.000000
2	-0.29016402	9.10064980	-2.64068113		2.00000000	17.17000000	156.25815707	0.061815
3	-0.27996606	9.10257430	-2.54841186		3.00000000	11.44666667	104.19413382	0.083243
4	-0.27011716	9.10085200	-2.45829630		4.00000000	8.58500000	78.13081442	0.104750
5	-0.25996462	9.10679820	-2.36744533		5.00000000	6.86800000	62.54549004	0.126135
6	-0.24980389	9.09433840	-2.27180111		6.00000000	5.72333333	52.04993011	0.147488
7	-0.23998922	9.10474680	-2.18504108		7.00000000	4.90571429	44.66528644	0.168881
8	-0.22981583	9.11853690	-2.09558413		8.00000000	4.29250000	39.14131964	0.190377
9	-0.21999151	9.10397430	-2.00279705		9.00000000	3.81555556	34.73671972	0.211742
10	-0.20987915	9.09643460	-1.90915196		10.00000000	3.43400000	31.23715642	0.233100
11	-0.20003471	9.09559630	-1.81943497		11.00000000	3.12181818	28.39479790	0.254487
12	-0.18989258	9.10416790	-1.72881393		12.00000000	2.86166667	26.05309381	0.275972
13	-0.18009876	9.09910960	-1.63873836		13.00000000	2.64153846	24.03564797	0.297356
14	-0.16994993	9.10342690	-1.54712676		14.00000000	2.45285714	22.32940570	0.318698
15	-0.16014569	9.10213850	-1.45766825		15.00000000	2.28933333	20.83782907	0.340072
16	-0.15001993	9.10011390	-1.36519845		16.00000000	2.14625000	19.53111946	0.361575
17	-0.13984653	9.10104850	-1.27275005		17.00000000	2.02000000	18.38411797	0.382954
18	-0.13000211	9.10892390	-1.18417933		18.00000000	1.90777778	17.37780260	0.404312
19	-0.11989868	9.09352870	-1.09030209		19.00000000	1.80736842	16.43535661	0.425691
20	-0.11003341	9.10450360	-1.00179958		20.00000000	1.71700000	15.63243268	0.447167
21	-0.09992402	9.10703180	-0.91001123		21.00000000	1.63523810	14.89216533	0.468561
22	-0.09007662	9.10606580	-0.82024361		22.00000000	1.56090909	14.21374089	0.489910
23	-0.07996277	9.09319310	-0.72711689		23.00000000	1.49304348	13.57653265	0.511285
24	-0.07012429	9.10623070	-0.63856797		24.00000000	1.43083333	13.02949843	0.532769
25	-0.05998365	9.10906790	-0.54639512		25.00000000	1.37360000	12.51221567	0.554149
26	-0.04986459	9.09427450	-0.45348223		26.00000000	1.32076923	12.01143794	0.575513
27	-0.04002239	9.10486700	-0.36439856		27.00000000	1.27185185	11.58004195	0.596882
28	-0.02988398	9.10267730	-0.27202422		28.00000000	1.22642857	11.16378352	0.618367
29	-0.02003434	9.10575870	-0.18242789		29.00000000	1.18413793	10.78247427	0.639746
30	-0.00993835	9.10614400	-0.09050007		30.00000000	1.14466667	10.42349950	0.661145
31	-0.00063650	9.09708500	-0.00579027		31.00000000	1.10774194	10.07722255	0.682610
32	0.00946673	9.09997560	0.08614700		32.00000000	1.07312500	9.76541132	0.704087
33	0.01931534	9.09820460	0.17573492		33.00000000	1.04060606	9.46764685	0.725462
34	0.02946612	9.10101700	0.26817163		34.00000000	1.01000000	9.19202717	0.746845
35	0.03925742	9.10278420	0.35735184		35.00000000	0.98114286	8.93113170	0.768337
36	0.04941043	9.09754090	0.44951340		36.00000000	0.95388889	8.67804318	0.789723
37	0.05929105	9.10023400	0.53956239		37.00000000	0.92810811	8.44600096	0.811063
38	0.06942396	9.09509940	0.63141781		38.00000000	0.90368421	8.21909772	0.832444
39	0.07956729	9.11125370	0.72495777		39.00000000	0.88051282	8.02257569	0.853918
40	0.08936381	9.08429340	0.81180703		40.00000000	0.85850000	7.79886588	0.875307
41	0.09954733	9.10531620	0.90640995		41.00000000	0.83756098	7.62625752	0.896675
42	0.10932077	9.10087200	0.99491433		42.00000000	0.81761905	7.44104630	0.918055
43	0.11947601	9.10711860	1.08808219		43.00000000	0.79860465	7.27298727	0.939536
44	0.12932687	9.09333040	1.17601196		44.00000000	0.78045455	7.09693104	0.960920
45	0.13947317	9.09777740	1.26889585		45.00000000	0.76311111	6.94261502	0.982273
46	0.14927787	9.11014940	1.35994370		46.00000000	0.74652174	6.80092457	1.003653
47	0.15942493	9.09829810	1.45049554		47.00000000	0.73063830	6.64756504	1.025145
48	0.16957124	9.10165120	1.54337828		48.00000000	0.71541667	6.51147296	1.046531
49	0.17942283	9.10167600	1.63304847		49.00000000	0.70081633	6.37860314	1.067898
50	0.18955053	9.09467510	1.72390049		50.00000000	0.68680000	6.24622286	1.089276
51	0.19934109	9.10786630	1.81557200		51.00000000	0.67333333	6.13262998	1.110766
52	0.20946433	9.09726050	1.90555158		52.00000000	0.66038462	6.00769088	1.132157
53	0.21928912	9.09261420	1.99391137		53.00000000	0.64792453	5.89132777	1.153512
54	0.22948605	9.09698200	2.08763047		54.00000000	0.63592593	5.78500670	1.174887
55	0.23926024	9.09990020	2.17724431		55.00000000	0.62436364	5.68164678	1.196355
56	0.24940729	9.09718890	2.26890523		56.00000000	0.61321429	5.57852619	1.217719
57	0.25956550	9.10198970	2.36256251		57.00000000	0.60245614	5.48354958	1.239073
58	0.26935607	9.10104850	2.45142266		58.00000000	0.59206897	5.38844837	1.260449
59	0.27949941	9.09180640	2.54115452		59.00000000	0.58203390	5.29173952	1.281936
60	0.28934205	9.09791090	2.63240819		60.00000000	0.57233333	5.20703767	1.303319
61	0.29949060	9.09229850	2.72305793		61.00000000	0.56295082	5.11851689	1.324704
62	0.30930424	9.10356240	2.81577045		62.00000000	0.55387097	5.04219892	1.346047
63	0.31945723	9.09833810	2.90652989		63.00000000	0.54507937	4.95931635	1.367527
64	0.32928875	9.10548780	2.99833470		64.00000000	0.53656250	4.88566330	1.388910
65	0.33942240	9.09386920	3.08666291		65.00000000	0.52830769	4.80436105	1.410295
66	0.34923083	9.09697530	3.17694423		66.00000000	0.52030303	4.73318382	1.431771
67	0.35939351	9.10241890	3.27135028		67.00000000	0.51253731	4.66532933	1.453158
68	0.36955172	9.08434010	3.35713351		68.00000000	0.50500000	4.58759175	1.474505
69	0.37936088	9.10396580	3.45368848		69.00000000	0.49768116	4.53087225	1.495891
70	0.38951316	9.08936120	3.54042580		70.00000000	0.49057143	4.45898091	1.517391
71	0.39933199	9.09276100	3.63103034		71.00000000	0.48366197	4.39782271	1.538780
72	0.40950808	9.08871080	3.72190051		72.00000000	0.47694444	4.33481012	1.560138
73	0.41935223	9.08091830	3.80810334		73.00000000	0.47041096	4.27176349	1.581516
74	0.42948887	9.08621410	3.90242783		74.00000000	0.46405405	4.21649449	1.602992
75	0.43929207	9.09168820	3.99390653		75.00000000	0.45786667	4.16278097	1.624367
76	0.44945773	9.08114050	4.08158879		76.00000000	0.45184211	4.10324164	1.645723
77	0.45959213	9.07558630	4.17106804		77.00000000	0.44597403	4.04747576	1.667111
78	0.46946383	9.07704540	4.26134450		78.00000000	0.44025641	3.99622742	1.688604
79	0.47957963	9.06394960	4.34688560		79.00000000	0.43468354	3.93994974	1.709987
80	0.48939323	9.05349060	4.43071701		80.00000000	0.42925000	3.88621084	1.731347
81	0.49952841	9.04390140	4.51768569		81.00000000	0.42395062	3.83416758	1.752718
82	0.50932270	9.02639960	4.59735022		82.00000000	0.41878049	3.78008003	1.774200
83	0.51947641	8.99992940	4.67525101		83.00000000	0.41373494	3.72358525	1.795590
84	0.52923203	8.97129150	4.74789481		84.00000000	0.40880952	3.66754941	1.816941
85	0.53940809	8.92169190	4.81243279		85.00000000	0.40400000	3.60436353	1.838309
86	0.54951644	8.84796910	4.86210448		86.00000000	0.39930233	3.53301464	1.859791
87	0.55934274	8.76735020	4.90395368		87.00000000	0.39471264	3.46058398	1.881171
88	0.56949651	8.62383270	4.91124263		88.00000000	0.39022727	3.36525471	1.902534
89	0.57930934	8.43574140	4.88690378		89.00000000	0.38584270	3.25486921	1.923910
90	0.58941847	8.20395660	4.83556355		90.00000000	0.38155556	3.13026522	1.945390
91	0.59923732	7.82508520	4.68908308		91.00000000	0.37736264	2.95289479	1.966772
92	0.60935831	7.37323140	4.49293983		92.00000000	0.37326087	2.75213876	1.988260
93	0.61914593	6.75505540	4.18236506		93.00000000	0.36924731	2.49428605	2.009640
94	0.62926394	5.92171290	3.72632039		94.00000000	0.36531915	2.16331512	2.031148
95	0.63937151	4.87906120	3.11953273		95.00000000	0.36147368	1.76365223	2.052536
96	0.64915985	3.57916240	2.32344853		96.00000000	0.35770833	1.28029622	2.073928
97	0.65925038	1.93277910	1.27418536		97.00000000	0.35402062	0.68424365	2.095429
98	0.66897243	-0.00346539	-0.00231825		98.00000000	0.35040816	-0.00121430	2.116808
99	0.67905104	-2.38276890	-1.61802170		99.00000000	0.34686869	-0.82650792	2.138159
100	0.68882525	-5.08652730	-3.50372844		100.00000000	0.34340000	-1.74671347	2.159568
101	0.69908166	-8.38903810	-5.86462268		101.00000000	0.34000000	-2.85227295	2.181052
