# Supplementary material for: Study on the Electrical Injection Regeneration of Industrialized B-Doped Czochralski Silicon PERC Solar Cells
Source: Hindawi journal article supplement (doi:10.1155/2019/5357370), 2019-06-20
Supplement: f1 [file 5357370.f1.zip › section3.3/IVRawData_3-6-6h.csv]

05:26 04/04/2018
Test Lot:	JK-PERC
Recipe:	Recipe_YJX-LID
Cell Name:	3-6-6h
Test Order:	2
Test Condition:	Light
1	-0.29990938	9.10731320	-2.73136866		1.00000000	34.34000000	312.74513529	0.000000
2	-0.29012454	9.11032390	-2.64312853		2.00000000	17.17000000	156.42426136	0.061826
3	-0.28000331	9.10201260	-2.54859366		3.00000000	11.44666667	104.18770423	0.083253
4	-0.27016115	9.11310390	-2.46200663		4.00000000	8.58500000	78.23599698	0.104754
5	-0.26001686	9.11392020	-2.36977291		5.00000000	6.86800000	62.59440393	0.126146
6	-0.24982415	9.09458450	-2.27204684		6.00000000	5.72333333	52.05133862	0.147495
7	-0.23999466	9.10856150	-2.18600612		7.00000000	4.90571429	44.68400027	0.168872
8	-0.22986077	9.09689900	-2.09102021		8.00000000	4.29250000	39.04843896	0.190362
9	-0.22003351	9.10177230	-2.00269491		9.00000000	3.81555556	34.72831786	0.211749
10	-0.20985273	9.12026500	-1.91391251		10.00000000	3.43400000	31.31899001	0.233094
11	-0.20008427	9.10341070	-1.82144928		11.00000000	3.12181818	28.41919304	0.254480
12	-0.18993102	9.10509300	-1.72933960		12.00000000	2.86166667	26.05574114	0.275954
13	-0.18015066	9.11116310	-1.64138205		13.00000000	2.64153846	24.06748776	0.297330
14	-0.16997954	9.10320570	-1.54735872		14.00000000	2.45285714	22.32886312	0.318674
15	-0.16016941	9.10827260	-1.45886665		15.00000000	2.28933333	20.85187207	0.340044
16	-0.15004146	9.10360810	-1.36591865		16.00000000	2.14625000	19.53861888	0.361512
17	-0.13988896	9.10909560	-1.27426191		17.00000000	2.02000000	18.40037311	0.382885
18	-0.13005129	9.10221100	-1.18375428		18.00000000	1.90777778	17.36499587	0.404220
19	-0.11991144	9.10535050	-1.09183569		19.00000000	1.80736842	16.45672296	0.425590
20	-0.11009534	9.10886860	-1.00284399		20.00000000	1.71700000	15.63992739	0.447068
21	-0.09992424	9.09864140	-0.90917480		21.00000000	1.63523810	14.87844503	0.468453
22	-0.09010293	9.11689380	-0.82145887		22.00000000	1.56090909	14.23064241	0.489810
23	-0.07999583	9.10438540	-0.72831289		23.00000000	1.49304348	13.59324325	0.511193
24	-0.07020504	9.10559370	-0.63925857		24.00000000	1.43083333	13.02858699	0.532675
25	-0.05999002	9.10648350	-0.54629815		25.00000000	1.37360000	12.50866574	0.554061
26	-0.04986729	9.10052870	-0.45381871		26.00000000	1.32076923	12.01969829	0.575457
27	-0.04007204	9.10439590	-0.36483171		27.00000000	1.27185185	11.57944279	0.596809
28	-0.02988977	9.10311220	-0.27208989		28.00000000	1.22642857	11.16431689	0.618291
29	-0.02006028	9.10410880	-0.18263094		29.00000000	1.18413793	10.78052056	0.639664
30	-0.00989438	9.10759350	-0.09011398		30.00000000	1.14466667	10.42515869	0.661055
31	-0.00068486	9.10750290	-0.00623736		31.00000000	1.10774194	10.08876289	0.682587
32	0.00947190	9.11162660	0.08630442		32.00000000	1.07312500	9.77791430	0.704051
33	0.01926688	9.09735970	0.17527769		33.00000000	1.04060606	9.46676764	0.725433
34	0.02945109	9.10374830	0.26811530		34.00000000	1.01000000	9.19478578	0.746796
35	0.03922969	9.09872820	0.35694030		35.00000000	0.98114286	8.92715218	0.768161
36	0.04938935	9.10492990	0.44968654		36.00000000	0.95388889	8.68509147	0.789654
37	0.05921483	9.10049920	0.53888455		37.00000000	0.92810811	8.44624710	0.811036
38	0.06935737	9.10939880	0.63180397		38.00000000	0.90368421	8.23201986	0.832416
39	0.07953043	9.10022350	0.72374464		39.00000000	0.88051282	8.01286346	0.853788
40	0.08936559	9.10242940	0.81344395		40.00000000	0.85850000	7.81443564	0.875271
41	0.09945454	9.10700610	0.90573308		41.00000000	0.83756098	7.62767291	0.896647
42	0.10928822	9.10016540	0.99454088		42.00000000	0.81761905	7.44046857	0.918030
43	0.11946499	9.10689260	1.08795483		43.00000000	0.79860465	7.27280679	0.939370
44	0.12926888	9.10258010	1.17668033		44.00000000	0.78045455	7.10415001	0.960838
45	0.13943748	9.10670850	1.26981648		45.00000000	0.76311111	6.94943044	0.982204
46	0.14922129	9.10982320	1.35937957		46.00000000	0.74652174	6.80068106	1.003584
47	0.15936680	9.09833910	1.44997319		47.00000000	0.73063830	6.64759499	1.025068
48	0.16957261	9.10307030	1.54363139		48.00000000	0.71541667	6.51248821	1.046448
49	0.17937204	9.10297390	1.63281900		49.00000000	0.70081633	6.37951273	1.067787
50	0.18952054	9.09861470	1.72437437		50.00000000	0.68680000	6.24892858	1.089170
51	0.19929838	9.11211780	1.81603032		51.00000000	0.67333333	6.13549265	1.110656
52	0.20942827	9.09518810	1.90478951		52.00000000	0.66038462	6.00632230	1.132027
53	0.21921656	9.11232090	1.99757164		53.00000000	0.64792453	5.90409622	1.153388
54	0.22938439	9.10530850	2.08861564		54.00000000	0.63592593	5.79030174	1.174762
55	0.23918085	9.09689240	2.17580246		55.00000000	0.62436364	5.67976882	1.196236
56	0.24936061	9.11225410	2.27223724		56.00000000	0.61321429	5.58776439	1.217639
57	0.25950387	9.09216400	2.35945174		57.00000000	0.60245614	5.47763003	1.238985
58	0.26933384	9.09905530	2.45068350		58.00000000	0.59206897	5.38726826	1.260361
59	0.27950168	9.10379310	2.54452547		59.00000000	0.58203390	5.29871619	1.281837
60	0.28933388	9.10388470	2.63406228		60.00000000	0.57233333	5.21045668	1.303215
61	0.29943547	9.08751490	2.72112430		61.00000000	0.56295082	5.11582396	1.324581
62	0.30925798	9.11125470	2.81772822		62.00000000	0.55387097	5.04645946	1.345949
63	0.31941170	9.09448720	2.90488562		63.00000000	0.54507937	4.95721731	1.367424
64	0.32925281	9.09925080	2.99595389		64.00000000	0.53656250	4.88231676	1.388795
65	0.33937746	9.10385510	3.08964322		65.00000000	0.52830769	4.80963668	1.410145
66	0.34915981	9.11545560	3.18275075		66.00000000	0.52030303	4.74279917	1.431515
67	0.35937378	9.09907050	3.26996736		67.00000000	0.51253731	4.66361315	1.452993
68	0.36948207	9.11600780	3.36820143		68.00000000	0.50500000	4.60358394	1.474362
69	0.37932470	9.09497170	3.44994741		69.00000000	0.49768116	4.52639606	1.495717
70	0.38943449	9.08332250	3.53735907		70.00000000	0.49057143	4.45601850	1.517084
71	0.39928898	9.09615140	3.63199301		71.00000000	0.48366197	4.39946252	1.538563
72	0.40942633	9.09401700	3.72333001		72.00000000	0.47694444	4.33734089	1.559946
73	0.41927639	9.10259630	3.81650372		73.00000000	0.47041096	4.28196105	1.581333
74	0.42943752	9.08652020	3.90209270		74.00000000	0.46405405	4.21663654	1.602674
75	0.43922803	9.08626650	3.99094293		75.00000000	0.45786667	4.16029855	1.624134
76	0.44942042	9.08363440	4.08237079		76.00000000	0.45184211	4.10436849	1.645539
77	0.45954362	9.09029390	4.17738657		77.00000000	0.44597403	4.05403497	1.666919
78	0.46940556	9.07135200	4.25814307		78.00000000	0.44025641	3.99372087	1.688394
79	0.47949600	9.07726290	4.35251125		79.00000000	0.43468354	3.94573681	1.709779
80	0.48937434	9.04927250	4.42848176		80.00000000	0.42925000	3.88440022	1.731123
81	0.49950570	9.05051900	4.52078583		81.00000000	0.42395062	3.83697312	1.752510
82	0.50931185	9.03506660	4.60166648		82.00000000	0.41878049	3.78370960	1.773995
83	0.51943129	9.00787730	4.67897333		83.00000000	0.41373494	3.72687357	1.795376
84	0.52923447	8.96279340	4.74341921		84.00000000	0.40880952	3.66407530	1.816746
85	0.53933090	8.92909050	4.81573442		85.00000000	0.40400000	3.60735256	1.838127
86	0.54951137	8.84184070	4.85869200		86.00000000	0.39930233	3.53056755	1.859606
87	0.55933982	8.76332000	4.90167383		87.00000000	0.39471264	3.45899320	1.880988
88	0.56943846	8.61950780	4.90827925		88.00000000	0.39022727	3.36356702	1.902331
89	0.57926023	8.43295760	4.88487696		89.00000000	0.38584270	3.25379510	1.923707
90	0.58938938	8.17039780	4.81554569		90.00000000	0.38155556	3.11746067	1.945188
91	0.59918880	7.83113530	4.69232856		91.00000000	0.37736264	2.95517787	1.966583
92	0.60930604	7.31912420	4.45958658		92.00000000	0.37326087	2.73194266	1.988050
93	0.61908466	6.73599240	4.17014956		93.00000000	0.36924731	2.48724709	2.009502
94	0.62922269	5.89089300	3.70668354		94.00000000	0.36531915	2.15205602	2.031000
95	0.63935035	4.82290120	3.08352357		95.00000000	0.36147368	1.74335187	2.052395
96	0.64912748	3.53905220	2.29729604		96.00000000	0.35770833	1.26594846	2.073743
97	0.65922236	1.89509460	1.24928873		97.00000000	0.35402062	0.67090256	2.095120
98	0.66892803	-0.02297405	-0.01536799		98.00000000	0.35040816	-0.00805030	2.116610
99	0.67904007	-2.36334420	-1.60480541		99.00000000	0.34686869	-0.81977010	2.137989
100	0.68876064	-5.02296300	-3.45961921		100.00000000	0.34340000	-1.72488549	2.159361
101	0.69899988	-8.24019810	-5.75989748		101.00000000	0.34000000	-2.80166735	2.180720
05:26 04/04/2018
Test Lot:	JK-PERC
Recipe:	Recipe_YJX-LID
Cell Name:	3-6-6h
Test Order:	3
Test Condition:	Light
1	-0.29994810	9.10327720	-2.73051070		1.00000000	34.34000000	312.60653905	0.000000
2	-0.29006797	9.10203740	-2.64020951		2.00000000	17.17000000	156.28198216	0.021576
3	-0.27999064	9.10776330	-2.55008848		3.00000000	11.44666667	104.25353057	0.043026
4	-0.27019316	9.10347080	-2.45969554		4.00000000	8.58500000	78.15329682	0.064413
5	-0.26003918	9.09958080	-2.36624753		5.00000000	6.86800000	62.49592093	0.085793
6	-0.24986063	9.11023330	-2.27628863		6.00000000	5.72333333	52.14090192	0.107339
7	-0.24007431	9.11338230	-2.18788897		7.00000000	4.90571429	44.70764974	0.128820
8	-0.22989278	9.09815220	-2.09159950		8.00000000	4.29250000	39.05381832	0.150195
9	-0.22005063	9.10859300	-2.00435163		9.00000000	3.81555556	34.75434262	0.171571
10	-0.20989217	9.10727600	-1.91154592		10.00000000	3.43400000	31.27438578	0.192933
11	-0.20006640	9.10867120	-1.82233906		11.00000000	3.12181818	28.43561536	0.214429
12	-0.18991762	9.10640810	-1.72946735		12.00000000	2.86166667	26.05950451	0.235811
13	-0.18013726	9.09818740	-1.63892255		13.00000000	2.64153846	24.03321195	0.257211
14	-0.17001006	9.10383130	-1.54774291		14.00000000	2.45285714	22.33039763	0.278566
15	-0.16020662	9.10815050	-1.45918601		15.00000000	2.28933333	20.85159254	0.300056
16	-0.15002508	9.11132620	-1.36692744		16.00000000	2.14625000	19.55518386	0.321441
17	-0.13988970	9.10871980	-1.27421608		17.00000000	2.02000000	18.39961400	0.342820
18	-0.13004979	9.10739330	-1.18441459		18.00000000	1.90777778	17.37488255	0.364177
19	-0.11994344	9.09850120	-1.09130553		19.00000000	1.80736842	16.44434375	0.385652
20	-0.11010874	9.10887340	-1.00296657		20.00000000	1.71700000	15.63993563	0.407028
21	-0.09989723	9.10746290	-0.90981030		21.00000000	1.63523810	14.89287029	0.428418
22	-0.09009434	9.11708450	-0.82139774		22.00000000	1.56090909	14.23094008	0.490093
23	-0.07994908	9.09970950	-0.72751341		23.00000000	1.49304348	13.58626192	0.511501
24	-0.07012833	9.11726950	-0.63937888		24.00000000	1.43083333	13.04529311	0.532980
25	-0.06000912	9.10210130	-0.54620907		25.00000000	1.37360000	12.50264635	0.554372
26	-0.04981325	9.10448460	-0.45352395		26.00000000	1.32076923	12.02492312	0.575714
27	-0.03998580	9.11027530	-0.36428160		27.00000000	1.27185185	11.58692051	0.597089
28	-0.02988147	9.10772710	-0.27215227		28.00000000	1.22642857	11.16997674	0.618568
29	-0.02005476	9.09396840	-0.18237738		29.00000000	1.18413793	10.76851293	0.639940
30	-0.00993332	9.09706120	-0.09036402		30.00000000	1.14466667	10.41310272	0.661293
31	-0.00063282	9.11349300	-0.00576717		31.00000000	1.10774194	10.09539837	0.682787
32	0.00948544	9.10375690	0.08635315		32.00000000	1.07312500	9.76946912	0.704279
33	0.01932303	9.10262680	0.17589035		33.00000000	1.04060606	9.47224862	0.725671
34	0.02945014	9.11268520	0.26836986		34.00000000	1.01000000	9.20381205	0.747013
35	0.03925275	9.10229970	0.35729030		35.00000000	0.98114286	8.93065633	0.768380
36	0.04940442	9.11352250	0.45024829		36.00000000	0.95388889	8.69328785	0.789863
37	0.05923903	9.11900330	0.54020095		37.00000000	0.92810811	8.46342090	0.811248
38	0.06940410	9.10113810	0.63165633		38.00000000	0.90368421	8.22455480	0.832589
39	0.07956917	9.10675910	0.72461724		39.00000000	0.88051282	8.01861814	0.853970
40	0.08938368	9.09563730	0.81300157		40.00000000	0.85850000	7.80860462	0.875449
41	0.09953833	9.11453440	0.90724557		41.00000000	0.83756098	7.63397832	0.896852
42	0.10935731	9.09281350	0.99436562		42.00000000	0.81761905	7.43445751	0.918208
43	0.11947698	9.11291220	1.08878323		43.00000000	0.79860465	7.27761407	0.939585
44	0.12931904	9.09545420	1.17621541		44.00000000	0.78045455	7.09858857	0.961061
45	0.13949080	9.10272030	1.26974574		45.00000000	0.76311111	6.94638700	0.982436
46	0.14928970	9.10142990	1.35874974		46.00000000	0.74652174	6.79441528	1.003831
47	0.15943317	9.09725950	1.45040492		47.00000000	0.73063830	6.64680620	1.025195
48	0.16960494	9.11046410	1.54517972		48.00000000	0.71541667	6.51777786	1.046667
49	0.17941350	9.10316750	1.63323114		49.00000000	0.70081633	6.37964841	1.068046
50	0.18956071	9.10470290	1.72589395		50.00000000	0.68680000	6.25310995	1.089434
51	0.19936481	9.09812070	1.81384510		51.00000000	0.67333333	6.12606794	1.110791
52	0.20951276	9.11834430	1.91040948		52.00000000	0.66038462	6.02161429	1.132265
53	0.21930644	9.09652040	1.99492551		53.00000000	0.64792453	5.89385869	1.153642
54	0.22945066	9.11194710	2.09074228		54.00000000	0.63592593	5.79452340	1.175013
55	0.23927857	9.10348610	2.17826914		55.00000000	0.62436364	5.68388568	1.196529
56	0.24944364	9.10273840	2.27062020		56.00000000	0.61321429	5.58192923	1.217901
57	0.25956851	9.10561560	2.36353107		57.00000000	0.60245614	5.48573403	1.239240
58	0.26941207	9.10265830	2.45236602		58.00000000	0.59206897	5.38940148	1.260617
59	0.27954215	9.09373860	2.54208324		59.00000000	0.58203390	5.29286413	1.282097
60	0.28936708	9.11976620	2.63896012		60.00000000	0.57233333	5.21954619	1.303492
61	0.29951429	9.09788420	2.72494633		61.00000000	0.56295082	5.12166137	1.324851
62	0.30934519	9.10772510	2.81743095		62.00000000	0.55387097	5.04450452	1.346233
63	0.31948346	9.10257820	2.90812318		63.00000000	0.54507937	4.96162755	1.367715
64	0.32930467	9.09928700	2.99643770		64.00000000	0.53656250	4.88233618	1.389104
65	0.33942881	9.09878640	3.08839024		65.00000000	0.52830769	4.80695885	1.410456
66	0.34926787	9.10812090	3.18117399		66.00000000	0.52030303	4.73898290	1.431827
67	0.35942775	9.10625460	3.27304060		67.00000000	0.51253731	4.66729527	1.453312
68	0.36958462	9.09907340	3.36287758		68.00000000	0.50500000	4.59503207	1.474695
69	0.37942147	9.10190770	3.45345920		69.00000000	0.49768116	4.52984798	1.496038
70	0.38954112	9.10778050	3.54785502		70.00000000	0.49057143	4.46801689	1.517415
71	0.39936161	9.09086990	3.63054444		71.00000000	0.48366197	4.39690806	1.538887
72	0.40950510	9.09089470	3.72276774		72.00000000	0.47694444	4.33585172	1.560275
73	0.41934118	9.10099320	3.81642123		73.00000000	0.47041096	4.28120694	1.581618
74	0.42948020	9.08094500	3.90008607		74.00000000	0.46405405	4.21404934	1.602996
75	0.43931481	9.09495160	3.99554693		75.00000000	0.45786667	4.16427517	1.624469
76	0.44948584	9.08784580	4.08485800		76.00000000	0.45184211	4.10627138	1.645834
77	0.45962262	9.08414940	4.17528055		77.00000000	0.44597403	4.05129468	1.667197
78	0.46946096	9.07938290	4.26241581		78.00000000	0.44025641	3.99725652	1.688566
79	0.47959849	9.06851200	4.34924466		79.00000000	0.43468354	3.94193294	1.710044
80	0.48940483	9.06177430	4.43487611		80.00000000	0.42925000	3.88976662	1.731423
81	0.49956095	9.03203200	4.51205049		81.00000000	0.42395062	3.82913554	1.752817
82	0.50938737	9.03682330	4.60324365		82.00000000	0.41878049	3.78444527	1.774163
83	0.51951301	8.98841570	4.66959890		83.00000000	0.41373494	3.71882163	1.795678
84	0.52929330	8.97073940	4.74815226		84.00000000	0.40880952	3.66732370	1.817064
85	0.53945315	8.92038820	4.81213151		85.00000000	0.40400000	3.60383683	1.838445
86	0.54956758	8.86404510	4.87139181		86.00000000	0.39930233	3.53943382	1.859936
87	0.55941635	8.76570510	4.90367875		87.00000000	0.39471264	3.45993463	1.881304
88	0.56953305	8.63257120	4.91653460		88.00000000	0.39022727	3.36866472	1.902656
89	0.57935053	8.44434830	4.89223766		89.00000000	0.38584270	3.25819012	1.924035
90	0.58946055	8.18965050	4.82747589		90.00000000	0.38155556	3.12480665	1.945516
91	0.59923190	7.85173610	4.70501074		91.00000000	0.37736264	2.96295184	1.966888
92	0.60936195	7.35982510	4.48479737		92.00000000	0.37326087	2.74713472	1.988362
93	0.61917722	6.74368620	4.17553687		93.00000000	0.36924731	2.49008800	2.009770
94	0.62929392	5.93845270	3.73703218		94.00000000	0.36531915	2.16943049	2.031257
95	0.63941807	4.86085700	3.10811980		95.00000000	0.36147368	1.75707189	2.052653
96	0.64921695	3.57329920	2.31984641		96.00000000	0.35770833	1.27819890	2.074005
97	0.65928972	1.90551610	1.25628718		97.00000000	0.35402062	0.67459199	2.095376
98	0.66900897	-0.01659904	-0.01110490		98.00000000	0.35040816	-0.00581644	2.116893
99	0.67910260	-2.41424870	-1.63952257		99.00000000	0.34686869	-0.83742728	2.138285
100	0.68880695	-5.12917850	-3.53301380		100.00000000	0.34340000	-1.76135990	2.159651
101	0.69905758	-8.41971020	-5.88586224		101.00000000	0.34000000	-2.86270147	2.181034
05:26 04/04/2018
Test Lot:	JK-PERC
Recipe:	Recipe_YJX-LID
Cell Name:	3-6-6h
Test Order:	4
Test Condition:	Light
1	-0.29993540	9.09512710	-2.72795058		1.00000000	34.34000000	312.32666461	0.000000
2	-0.29007465	9.10311790	-2.64058374		2.00000000	17.17000000	156.30053434	0.061804
3	-0.27987599	9.10664080	-2.54873011		3.00000000	11.44666667	104.24068169	0.083224
4	-0.27009043	9.10146430	-2.45821841		4.00000000	8.58500000	78.13607102	0.104596
5	-0.25997886	9.10890580	-2.36812295		5.00000000	6.86800000	62.55996503	0.126088
6	-0.24982636	9.10284420	-2.27413043		6.00000000	5.72333333	52.09861164	0.147462
7	-0.23995966	9.10972020	-2.18596536		7.00000000	4.90571429	44.68968452	0.168853
8	-0.22979301	9.10041900	-2.09121267		8.00000000	4.29250000	39.06354856	0.190341
9	-0.21997246	9.10183620	-2.00215330		9.00000000	3.81555556	34.72856168	0.211717
10	-0.20984824	9.10321140	-1.91029289		10.00000000	3.43400000	31.26042795	0.233095
11	-0.20000833	9.10151580	-1.82037898		11.00000000	3.12181818	28.41327751	0.254480
12	-0.18987966	9.10650920	-1.72914087		12.00000000	2.86166667	26.05979383	0.275970
13	-0.18010747	9.10446640	-1.63978241		13.00000000	2.64153846	24.04979817	0.297362
14	-0.16992743	9.09936430	-1.54623159		14.00000000	2.45285714	22.31944072	0.318722
15	-0.16010463	9.11246200	-1.45894736		15.00000000	2.28933333	20.86146301	0.340093
16	-0.14996479	9.10666280	-1.36567877		16.00000000	2.14625000	19.54517503	0.361579
17	-0.13982345	9.09584520	-1.27181246		17.00000000	2.02000000	18.37360730	0.382959
18	-0.13000439	9.11060430	-1.18441855		18.00000000	1.90777778	17.38100843	0.404300
19	-0.11988538	9.10179620	-1.09117230		19.00000000	1.80736842	16.45029903	0.425690
20	-0.11005887	9.10054780	-1.00159601		20.00000000	1.71700000	15.62564057	0.447171
21	-0.09990116	9.09588810	-0.90868973		21.00000000	1.63523810	14.87394273	0.468560
22	-0.09007092	9.10581490	-0.82016911		22.00000000	1.56090909	14.21334926	0.489918
23	-0.07994223	9.09358880	-0.72696180		23.00000000	1.49304348	13.57712345	0.511289
24	-0.07012540	9.10176280	-0.63826477		24.00000000	1.43083333	13.02310561	0.532772
25	-0.05992527	9.10605720	-0.54568290		25.00000000	1.37360000	12.50808017	0.554156
26	-0.04980105	9.10370540	-0.45337407		26.00000000	1.32076923	12.02389398	0.575510
27	-0.03999463	9.09825130	-0.36388120		27.00000000	1.27185185	11.57162776	0.596884
28	-0.02986595	9.10227010	-0.27184792		28.00000000	1.22642857	11.16328412	0.618374
29	-0.02004092	9.10164450	-0.18240537		29.00000000	1.18413793	10.77760249	0.639759
30	-0.00987577	9.09999370	-0.08986945		30.00000000	1.14466667	10.41645946	0.661131
31	-0.00065211	9.10121060	-0.00593500		31.00000000	1.10774194	10.08179265	0.682612
32	0.00949646	9.10178470	0.08643473		32.00000000	1.07312500	9.76735271	0.704085
33	0.01932790	9.10210130	0.17592451		33.00000000	1.04060606	9.47170178	0.725488
34	0.02945183	9.10182950	0.26806555		34.00000000	1.01000000	9.19284780	0.746874
35	0.03931751	9.09176250	0.35746544		35.00000000	0.98114286	8.92031784	0.768239
36	0.04944591	9.11224650	0.45056327		36.00000000	0.95388889	8.69207069	0.789733
37	0.05931009	9.10533240	0.54003812		37.00000000	0.92810811	8.45073283	0.811111
38	0.06942955	9.09735010	0.63162496		38.00000000	0.90368421	8.22113164	0.832512
39	0.07958772	9.10560320	0.72469420		39.00000000	0.88051282	8.01760036	0.854006
40	0.08940279	9.10627560	0.81412642		40.00000000	0.85850000	7.81773760	0.875376
41	0.09954756	9.11313440	0.90719028		41.00000000	0.83756098	7.63280574	0.896742
42	0.10934626	9.09923930	0.99496779		42.00000000	0.81761905	7.43971137	0.918115
43	0.11953121	9.10056300	1.08780131		43.00000000	0.79860465	7.26775194	0.939590
44	0.12933512	9.10145760	1.17713811		44.00000000	0.78045455	7.10327395	0.960974
45	0.13950147	9.09803960	1.26918990		45.00000000	0.76311111	6.94281511	0.982328
46	0.14927933	9.09876730	1.35825789		46.00000000	0.74652174	6.79242759	1.003703
47	0.15948214	9.10990520	1.45286718		47.00000000	0.73063830	6.65604563	1.025193
48	0.16959937	9.10393240	1.54402120		48.00000000	0.71541667	6.51310497	1.046581
49	0.17943454	9.10597710	1.63392681		49.00000000	0.70081633	6.38161742	1.067939
50	0.18956666	9.11278720	1.72748063		50.00000000	0.68680000	6.25866225	1.089320
51	0.19931847	9.10916900	1.81562563		51.00000000	0.67333333	6.13350713	1.110807
52	0.20948482	9.10014530	1.90634230		52.00000000	0.66038462	6.00959595	1.132204
53	0.21932667	9.11425590	1.99899940		53.00000000	0.64792453	5.90534995	1.153557
54	0.22944018	9.08969020	2.08554016		54.00000000	0.63592593	5.78036966	1.174938
55	0.23929024	9.11479380	2.18108120		55.00000000	0.62436364	5.69094580	1.196414
56	0.24946254	9.09300420	2.26836392		56.00000000	0.61321429	5.57596008	1.217836
57	0.25956637	9.09768770	2.36145377		57.00000000	0.60245614	5.48095782	1.239192
58	0.26939559	9.09014030	2.44884371		58.00000000	0.59206897	5.38198996	1.260580
59	0.27956715	9.11026100	2.54692970		59.00000000	0.58203390	5.30248072	1.282074
60	0.28933904	9.09821990	2.63247021		60.00000000	0.57233333	5.20721452	1.303457
61	0.29953295	9.09942150	2.72557657		61.00000000	0.56295082	5.12252679	1.324836
62	0.30935916	9.10362530	2.81628988		62.00000000	0.55387097	5.04223375	1.346198
63	0.31949130	9.10783290	2.90987337		63.00000000	0.54507937	4.96449177	1.367677
64	0.32930785	9.09769920	2.99594376		64.00000000	0.53656250	4.88148423	1.389071
65	0.33943400	9.10594180	3.09086625		65.00000000	0.52830769	4.81073910	1.410450
66	0.34929076	9.09467700	3.17668664		66.00000000	0.52030303	4.73198800	1.431820
67	0.35939234	9.11261750	3.27500493		67.00000000	0.51253731	4.67055649	1.453294
68	0.36954531	9.09104540	3.35955319		68.00000000	0.50500000	4.59097793	1.474677
69	0.37939611	9.09426980	3.45033059		69.00000000	0.49768116	4.52604674	1.496068
70	0.38956842	9.08811470	3.54044248		70.00000000	0.49057143	4.45836941	1.517547
71	0.39935446	9.09712510	3.63297748		71.00000000	0.48366197	4.39993346	1.538923
72	0.40954164	9.09419250	3.72445051		72.00000000	0.47694444	4.33742459	1.560281
73	0.41932470	9.09077640	3.81198709		73.00000000	0.47041096	4.27640084	1.581669
74	0.42950222	9.08681490	3.90280717		74.00000000	0.46405405	4.21677329	1.603153
75	0.43931878	9.09787940	3.99686928		75.00000000	0.45786667	4.16561571	1.624558
76	0.44948885	9.08494380	4.08358094		76.00000000	0.45184211	4.10496013	1.645909
77	0.45962691	9.07347490	4.17041323		77.00000000	0.44597403	4.04653413	1.667288
78	0.46947995	9.08214660	4.26388573		78.00000000	0.44025641	3.99847326	1.688783
79	0.47960684	9.05245400	4.34161886		79.00000000	0.43468354	3.93495279	1.710158
80	0.48943084	9.07307150	4.44064101		80.00000000	0.42925000	3.89461594	1.731525
81	0.49954063	9.05040930	4.52104716		81.00000000	0.42395062	3.83692661	1.752905
82	0.50937134	9.02130030	4.59519182		82.00000000	0.41878049	3.77794454	1.774389
83	0.51951683	9.00416090	4.67781313		83.00000000	0.41373494	3.72533597	1.795785
84	0.52928501	8.98788740	4.75715407		84.00000000	0.40880952	3.67433397	1.817138
85	0.53941715	8.92009740	4.81165352		85.00000000	0.40400000	3.60371935	1.838520
86	0.54956412	8.85525890	4.86653256		86.00000000	0.39930233	3.53592547	1.859996
87	0.55937701	8.75874140	4.89943858		87.00000000	0.39471264	3.45718597	1.881375
88	0.56951505	8.62797070	4.91375916		88.00000000	0.39022727	3.36686948	1.902716
89	0.57929885	8.44788840	4.89385204		89.00000000	0.38584270	3.25955604	1.924097
90	0.58946002	8.19102100	4.82827940		90.00000000	0.38155556	3.12532957	1.945583
91	0.59927285	7.83822390	4.69723478		91.00000000	0.37736264	2.95785284	1.967006
92	0.60937595	7.36441660	4.48769836		92.00000000	0.37326087	2.74884854	1.988528
93	0.61918056	6.77125260	4.19262798		93.00000000	0.36924731	2.50026682	2.009916
94	0.62930226	5.93438720	3.73452328		94.00000000	0.36531915	2.16794528	2.031440
95	0.63940465	4.86271190	3.10924060		95.00000000	0.36147368	1.75774239	2.052835
96	0.64920557	3.57018830	2.31778613		96.00000000	0.35770833	1.27708611	2.074226
97	0.65931386	1.90483520	1.25588425		97.00000000	0.35402062	0.67435094	2.095598
98	0.66902024	-0.03763381	-0.02517778		98.00000000	0.35040816	-0.01318719	2.117101
99	0.67912781	-2.43988660	-1.65699484		99.00000000	0.34686869	-0.84632026	2.138478
100	0.68885058	-5.16771790	-3.55978547		100.00000000	0.34340000	-1.77459433	2.159872
101	0.69910848	-8.49789330	-5.94094927		101.00000000	0.34000000	-2.88928372	2.181363
