# Supplementary material for: Study on the Electrical Injection Regeneration of Industrialized B-Doped Czochralski Silicon PERC Solar Cells
Source: Hindawi journal article supplement (doi:10.1155/2019/5357370), 2019-06-20
Supplement: f1 [file 5357370.f1.zip › section3.3/IVRawData_3-6-7h.csv]

06:27 04/04/2018
Test Lot:	JK-PERC
Recipe:	Recipe_YJX-LID
Cell Name:	3-6-7h
Test Order:	2
Test Condition:	Light
1	-0.29995450	9.10227580	-2.73026859		1.00000000	34.34000000	312.57215097	0.000000
2	-0.29015908	9.08363150	-2.63569816		2.00000000	17.17000000	155.96595286	0.061793
3	-0.28006595	9.09972760	-2.54852386		3.00000000	11.44666667	104.16154859	0.083205
4	-0.27023706	9.09828570	-2.45869398		4.00000000	8.58500000	78.10878273	0.104712
5	-0.25999433	9.08911990	-2.36311964		5.00000000	6.86800000	62.42407547	0.126080
6	-0.24990046	9.10048010	-2.27421416		6.00000000	5.72333333	52.08508111	0.147418
7	-0.24004997	9.09968760	-2.18437974		7.00000000	4.90571429	44.64046745	0.168792
8	-0.22993377	9.10687540	-2.09397819		8.00000000	4.29250000	39.09126265	0.190314
9	-0.22008850	9.09479900	-2.00166067		9.00000000	3.81555556	34.70171085	0.211720
10	-0.20994774	9.11527440	-1.91373126		10.00000000	3.43400000	31.30185229	0.233130
11	-0.20016199	9.09021660	-1.81951584		11.00000000	3.12181818	28.37800346	0.254485
12	-0.19001454	9.11140820	-1.73130004		12.00000000	2.86166667	26.07381313	0.275961
13	-0.18022284	9.11126610	-1.64205825		13.00000000	2.64153846	24.06775984	0.297346
14	-0.17008209	9.09939860	-1.54764473		14.00000000	2.45285714	22.31952485	0.318721
15	-0.16024277	9.10583210	-1.45914376		15.00000000	2.28933333	20.84628495	0.340090
16	-0.15007892	9.10418320	-1.36634598		16.00000000	2.14625000	19.53985319	0.361574
17	-0.13999027	9.09298520	-1.27292945		17.00000000	2.02000000	18.36783010	0.382949
18	-0.13016136	9.10710910	-1.18539371		18.00000000	1.90777778	17.37434036	0.404335
19	-0.11998637	9.10704710	-1.09272152		19.00000000	1.80736842	16.45978934	0.425812
20	-0.11011653	9.11084370	-1.00325449		20.00000000	1.71700000	15.64331863	0.447177
21	-0.09997354	9.09777360	-0.90953661		21.00000000	1.63523810	14.87702597	0.468542
22	-0.09011485	9.10148620	-0.82017910		22.00000000	1.56090909	14.20659255	0.489919
23	-0.08004332	9.10124300	-0.72849367		23.00000000	1.49304348	13.58855151	0.511389
24	-0.07023674	9.10396670	-0.63943290		24.00000000	1.43083333	13.02625902	0.532769
25	-0.06002453	9.09974380	-0.54620784		25.00000000	1.37360000	12.49940808	0.554114
26	-0.04987038	9.10217380	-0.45392883		26.00000000	1.32076923	12.02187109	0.575490
27	-0.04008166	9.10841370	-0.36508031		27.00000000	1.27185185	11.58455283	0.596976
28	-0.02995430	9.09939670	-0.27256603		28.00000000	1.22642857	11.15976010	0.618359
29	-0.02012762	9.10793020	-0.18332099		29.00000000	1.18413793	10.78504562	0.639711
30	-0.00998538	9.09011840	-0.09076826		30.00000000	1.14466667	10.40515553	0.661079
31	-0.00070054	9.10763260	-0.00638022		31.00000000	1.10774194	10.08890656	0.682673
32	0.00944374	9.10288140	0.08596522		32.00000000	1.07312500	9.76852960	0.704050
33	0.01923887	9.09333900	0.17494559		33.00000000	1.04060606	9.46258367	0.725406
34	0.02934957	9.10269640	0.26716023		34.00000000	1.01000000	9.19372336	0.746773
35	0.03920648	9.09702870	0.35666246		35.00000000	0.98114286	8.92548473	0.768250
36	0.04934248	9.10124110	0.44907783		36.00000000	0.95388889	8.68157276	0.789629
37	0.05916664	9.10444550	0.53867949		37.00000000	0.92810811	8.44990969	0.811023
38	0.06937707	9.09529970	0.63100526		38.00000000	0.90368421	8.21927873	0.832387
39	0.07950638	9.10306170	0.72375144		39.00000000	0.88051282	8.01536253	0.853872
40	0.08928514	9.09920310	0.81242365		40.00000000	0.85850000	7.81166586	0.875263
41	0.09942784	9.09422680	0.90421935		41.00000000	0.83756098	7.61696947	0.896621
42	0.10924977	9.10795020	0.99504146		42.00000000	0.81761905	7.44683357	0.917978
43	0.11944829	9.10661320	1.08776937		43.00000000	0.79860465	7.27258366	0.939452
44	0.12918463	9.09587760	1.17504758		44.00000000	0.78045455	7.09891902	0.960842
45	0.13937497	9.10039520	1.26836731		45.00000000	0.76311111	6.94461269	0.982225
46	0.14918871	9.09760950	1.35726063		46.00000000	0.74652174	6.79156327	1.003596
47	0.15932173	9.08963780	1.44817682		47.00000000	0.73063830	6.64123749	1.025070
48	0.16953886	9.09564020	1.54206447		48.00000000	0.71541667	6.50717259	1.046446
49	0.17931464	9.10202880	1.63212702		49.00000000	0.70081633	6.37885039	1.067832
50	0.18943278	9.10294150	1.72439551		50.00000000	0.68680000	6.25190022	1.089322
51	0.19923238	9.08542160	1.81011017		51.00000000	0.67333333	6.11751721	1.110702
52	0.20939146	9.10419180	1.90634001		52.00000000	0.66038462	6.01226820	1.132053
53	0.21926400	9.08544350	1.99211068		53.00000000	0.64792453	5.88668169	1.153419
54	0.22939777	9.10131930	2.08782235		54.00000000	0.63592593	5.78776490	1.174886
55	0.23924203	9.09911160	2.17688993		55.00000000	0.62436364	5.68115441	1.196263
56	0.24932295	9.09981250	2.26879210		56.00000000	0.61321429	5.58013502	1.217620
57	0.25951776	9.10164170	2.36203767		57.00000000	0.60245614	5.48333993	1.239004
58	0.26938581	9.10191540	2.45192685		58.00000000	0.59206897	5.38896164	1.260487
59	0.27949205	9.09760000	2.54270687		59.00000000	0.58203390	5.29511159	1.281860
60	0.28928423	9.08712770	2.62876274		60.00000000	0.57233333	5.20086609	1.303213
61	0.29941577	9.10254290	2.72544489		61.00000000	0.56295082	5.12428399	1.324593
62	0.30921313	9.09934520	2.81363701		62.00000000	0.55387097	5.03986313	1.346074
63	0.31938112	9.09946540	2.90619745		63.00000000	0.54507937	4.95993082	1.367468
64	0.32916510	9.09362790	2.99330494		64.00000000	0.53656250	4.87929972	1.388814
65	0.33934352	9.09067060	3.08486016		65.00000000	0.52830769	4.80267121	1.410229
66	0.34921905	9.10045810	3.17805333		66.00000000	0.52030303	4.73499593	1.431727
67	0.35928211	9.09599400	3.26802792		67.00000000	0.51253731	4.66203633	1.453103
68	0.36949253	9.10057540	3.36259463		68.00000000	0.50500000	4.59579058	1.474472
69	0.37932563	9.08052350	3.44447530		69.00000000	0.49768116	4.51920546	1.495847
70	0.38945195	9.09333710	3.54141787		70.00000000	0.49057143	4.46093137	1.517327
71	0.39927018	9.08960440	3.62920798		71.00000000	0.48366197	4.39629599	1.538715
72	0.40945753	9.07727810	3.71675987		72.00000000	0.47694444	4.32935736	1.560072
73	0.41924000	9.09737300	3.81398266		73.00000000	0.47041096	4.27950396	1.581436
74	0.42931050	9.08168510	3.89886277		74.00000000	0.46405405	4.21439279	1.602915
75	0.43921879	9.09360120	3.99408052		75.00000000	0.45786667	4.16365687	1.624287
76	0.44936892	9.06890870	4.07528571		76.00000000	0.45184211	4.09771480	1.645662
77	0.45952949	9.08370490	4.17423028		77.00000000	0.44597403	4.05109645	1.667009
78	0.46941394	9.06033900	4.25304943		78.00000000	0.44025641	3.98887232	1.688490
79	0.47952759	9.08108430	4.35463047		79.00000000	0.43468354	3.94739791	1.709875
80	0.48933092	9.05006030	4.42847433		80.00000000	0.42925000	3.88473838	1.731269
81	0.49941781	9.04692750	4.51819672		81.00000000	0.42395062	3.83545050	1.752761
82	0.50923902	9.03000550	4.59843115		82.00000000	0.41878049	3.78159011	1.774146
83	0.51943749	9.00292300	4.67645573		83.00000000	0.41373494	3.72482381	1.795496
84	0.52915007	8.95882130	4.74056092		84.00000000	0.40880952	3.66245147	1.816872
85	0.53936046	8.92896180	4.81592894		85.00000000	0.40400000	3.60730057	1.838369
86	0.54950392	8.84531780	4.86053680		86.00000000	0.39930233	3.53195597	1.859744
87	0.55934966	8.74224000	4.88996897		87.00000000	0.39471264	3.45067266	1.881089
88	0.56943208	8.60078330	4.89756192		88.00000000	0.39022727	3.35626021	1.902467
89	0.57928896	8.42735580	4.88187418		89.00000000	0.38584270	3.25163369	1.923941
90	0.58936471	8.13992880	4.79738678		90.00000000	0.38155556	3.10583506	1.945321
91	0.59917474	7.78910780	4.66703664		91.00000000	0.37736264	2.93931826	1.966688
92	0.60929215	7.32037730	4.46024842		92.00000000	0.37326087	2.73241040	1.988166
93	0.61906123	6.68013530	4.13541278		93.00000000	0.36924731	2.46662200	2.009661
94	0.62929469	5.85170890	3.68244934		94.00000000	0.36531915	2.13774132	2.031049
95	0.63931835	4.78248550	3.05753074		95.00000000	0.36147368	1.72874265	2.052397
96	0.64912838	3.49822660	2.27079817		96.00000000	0.35770833	1.25134481	2.073773
97	0.65919662	1.85115490	1.22027505		97.00000000	0.35402062	0.65534700	2.095239
98	0.66891289	-0.03266768	-0.02185183		98.00000000	0.35040816	-0.01144702	2.116609
99	0.67904216	-2.37084960	-1.60990683		99.00000000	0.34686869	-0.82237349	2.137964
100	0.68873608	-4.98809860	-3.43548348		100.00000000	0.34340000	-1.71291306	2.159330
101	0.69896883	-8.13065810	-5.68307658		101.00000000	0.34000000	-2.76442375	2.180948
06:28 04/04/2018
Test Lot:	JK-PERC
Recipe:	Recipe_YJX-LID
Cell Name:	3-6-7h
Test Order:	3
Test Condition:	Light
1	-0.30001256	9.09615800	-2.72896165		1.00000000	34.34000000	312.36206572	0.000000
2	-0.29015163	9.10479260	-2.64177041		2.00000000	17.17000000	156.32928894	0.021599
3	-0.27997738	9.10702900	-2.54976212		3.00000000	11.44666667	104.24512529	0.042995
4	-0.27018794	9.10341070	-2.45963178		4.00000000	8.58500000	78.15278086	0.064341
5	-0.26008067	9.09992120	-2.36671360		5.00000000	6.86800000	62.49825880	0.085711
6	-0.24991162	9.10704520	-2.27595642		6.00000000	5.72333333	52.12265536	0.107204
7	-0.24009091	9.08502480	-2.18123187		7.00000000	4.90571429	44.56853595	0.128582
8	-0.22993153	9.11433030	-2.09567191		8.00000000	4.29250000	39.12326281	0.149936
9	-0.22012123	9.09284970	-2.00152926		9.00000000	3.81555556	34.69427319	0.171308
10	-0.20997229	9.10500620	-1.91179900		10.00000000	3.43400000	31.26659129	0.192782
11	-0.20016572	9.10069370	-1.82164691		11.00000000	3.12181818	28.41071106	0.214178
12	-0.18999593	9.10260490	-1.72945788		12.00000000	2.86166667	26.04862102	0.235619
13	-0.18016925	9.09470270	-1.63858576		13.00000000	2.64153846	24.02400698	0.256990
14	-0.17000990	9.09564210	-1.54634920		14.00000000	2.45285714	22.31031069	0.278478
15	-0.16020554	9.09809880	-1.45756583		15.00000000	2.28933333	20.82858085	0.299845
16	-0.15010051	9.09616760	-1.36533940		16.00000000	2.14625000	19.52264971	0.321245
17	-0.13994114	9.10133460	-1.27365114		17.00000000	2.02000000	18.38469589	0.342643
18	-0.13010927	9.10832210	-1.18507714		18.00000000	1.90777778	17.37665450	0.364109
19	-0.11992013	9.09785180	-1.09101557		19.00000000	1.80736842	16.44317004	0.385496
20	-0.11015970	9.10196690	-1.00266994		20.00000000	1.71700000	15.62807717	0.406892
21	-0.10001968	9.09456540	-0.90963552		21.00000000	1.63523810	14.87177980	0.428250
22	-0.09016175	9.10470390	-0.82089602		22.00000000	1.56090909	14.21161509	0.449732
23	-0.08003141	9.09776500	-0.72810696		23.00000000	1.49304348	13.58335870	0.471110
24	-0.07019283	9.10883140	-0.63937464		24.00000000	1.43083333	13.03321959	0.492482
25	-0.06005281	9.09321020	-0.54607284		25.00000000	1.37360000	12.49043353	0.513858
26	-0.04992545	9.10234260	-0.45443855		26.00000000	1.32076923	12.02209403	0.535334
27	-0.04006305	9.09799000	-0.36449326		27.00000000	1.27185185	11.57129543	0.556703
28	-0.02995727	9.09773640	-0.27254338		28.00000000	1.22642857	11.15772386	0.578081
29	-0.02014921	9.10299020	-0.18341805		29.00000000	1.18413793	10.77919598	0.599431
30	-0.01001366	9.10008430	-0.09112514		30.00000000	1.14466667	10.41656316	0.620901
31	-0.00071021	9.09806820	-0.00646155		31.00000000	1.10774194	10.07831168	0.642393
32	0.00942290	9.10038470	0.08575200		32.00000000	1.07312500	9.76585033	0.663771
33	0.01924929	9.09746270	0.17511972		33.00000000	1.04060606	9.46687482	0.685295
34	0.02939944	9.09543320	0.26740061		34.00000000	1.01000000	9.18638753	0.706677
35	0.03921392	9.10701370	0.35712172		35.00000000	0.98114286	8.93528144	0.728039
36	0.04937002	9.09290700	0.44891701		36.00000000	0.95388889	8.67362296	0.749418
37	0.05918302	9.10852910	0.53907022		37.00000000	0.92810811	8.45369971	0.770894
38	0.06935028	9.09248640	0.63056648		38.00000000	0.90368421	8.21673639	0.792274
39	0.07949298	9.09224890	0.72276995		39.00000000	0.88051282	8.00584172	0.813634
40	0.08931343	9.09670160	0.81245758		40.00000000	0.85850000	7.80951832	0.835006
41	0.09948292	9.11048510	0.90633762		41.00000000	0.83756098	7.63058679	0.856493
42	0.10927582	9.09488770	0.99385131		42.00000000	0.81761905	7.43615342	0.877883
43	0.11943489	9.10644630	1.08762741		43.00000000	0.79860465	7.27245037	0.899242
44	0.12926650	9.10054020	1.17639498		44.00000000	0.78045455	7.10255797	0.920620
45	0.13936156	9.09491250	1.26748119		45.00000000	0.76311111	6.94042878	0.942094
46	0.14919391	9.09742640	1.35728062		46.00000000	0.74652174	6.79142658	0.963473
47	0.15937755	9.09569550	1.44964966		47.00000000	0.73063830	6.64566348	0.984826
48	0.16950314	9.10962200	1.54410953		48.00000000	0.71541667	6.51717541	1.006210
49	0.17928189	9.09057520	1.62977550		49.00000000	0.70081633	6.37082352	1.027688
50	0.18947819	9.10934160	1.72602156		50.00000000	0.68680000	6.25629581	1.049076
51	0.19928002	9.08843610	1.81114373		51.00000000	0.67333333	6.11954697	1.070419
52	0.20940933	9.11340520	1.90843208		52.00000000	0.66038462	6.01835259	1.091787
53	0.21922679	9.09039500	1.99285812		53.00000000	0.64792453	5.88988989	1.113267
54	0.22934046	9.10055350	2.08712513		54.00000000	0.63592593	5.78727791	1.134645
55	0.23917058	9.09581090	2.17545037		55.00000000	0.62436364	5.67909357	1.156006
56	0.24933189	9.10767650	2.27083420		56.00000000	0.61321429	5.58495734	1.177383
57	0.25949916	9.09978100	2.36138553		57.00000000	0.60245614	5.48221894	1.198857
58	0.26931512	9.09788320	2.45019751		58.00000000	0.59206897	5.38657429	1.220257
59	0.27947345	9.09091280	2.54066876		59.00000000	0.58203390	5.29121942	1.241641
60	0.28933558	9.09763810	2.63227040		60.00000000	0.57233333	5.20688154	1.262992
61	0.29938525	9.09810160	2.72383742		61.00000000	0.56295082	5.12178375	1.284467
62	0.30923843	9.09472560	2.81243867		62.00000000	0.55387097	5.03730447	1.305833
63	0.31938931	9.09235570	2.90400121		63.00000000	0.54507937	4.95605547	1.327215
64	0.32921794	9.09796050	2.99521181		64.00000000	0.53656250	4.88162443	1.348700
65	0.33937851	9.08866600	3.08449792		65.00000000	0.52830769	4.80161216	1.370071
66	0.34914237	9.09412190	3.17514327		66.00000000	0.52030303	4.73169918	1.391420
67	0.35930666	9.09897800	3.26932339		67.00000000	0.51253731	4.66356574	1.412803
68	0.36948064	9.09211730	3.35936132		68.00000000	0.50500000	4.59151924	1.434282
69	0.37930554	9.09246920	3.44882394		69.00000000	0.49768116	4.52515061	1.455655
70	0.38939315	9.09669880	3.54219220		70.00000000	0.49057143	4.46258053	1.477016
71	0.39925826	9.09907340	3.63288021		71.00000000	0.48366197	4.40087578	1.498391
72	0.40936226	9.08785340	3.72022421		72.00000000	0.47694444	4.33440119	1.519870
73	0.41922960	9.10124300	3.81551046		73.00000000	0.47041096	4.28132445	1.541238
74	0.42930382	9.08195880	3.89891961		74.00000000	0.46405405	4.21451980	1.562577
75	0.43915924	9.09947010	3.99611637		75.00000000	0.45786667	4.16634404	1.583954
76	0.44943243	9.07032390	4.07649771		76.00000000	0.45184211	4.09835425	1.605430
77	0.45961010	9.08747670	4.17669607		77.00000000	0.44597403	4.05277857	1.667042
78	0.46949902	9.06339360	4.25525441		78.00000000	0.44025641	3.99021713	1.688518
79	0.47962761	9.06274220	4.34674138		79.00000000	0.43468354	3.93942490	1.709906
80	0.48939297	9.07236190	4.43995014		80.00000000	0.42925000	3.89431135	1.731267
81	0.49959150	9.02718070	4.50990275		81.00000000	0.42395062	3.82707883	1.752639
82	0.50941193	9.03415490	4.60210628		82.00000000	0.41878049	3.78332780	1.774132
83	0.51949960	9.00112630	4.67608151		83.00000000	0.41373494	3.72408045	1.795495
84	0.52930588	8.96721650	4.74640042		84.00000000	0.40880952	3.66588351	1.816839
85	0.53942400	8.91515920	4.80905084		85.00000000	0.40400000	3.60172432	1.838221
86	0.54957640	8.84518720	4.86110614		86.00000000	0.39930233	3.53190382	1.859694
87	0.55944896	8.75015450	4.89526483		87.00000000	0.39471264	3.45379662	1.881081
88	0.56954849	8.60806560	4.90271076		88.00000000	0.39022727	3.35910196	1.902437
89	0.57932055	8.43973350	4.88931105		89.00000000	0.38584270	3.25640953	1.923801
90	0.58947068	8.16037940	4.81030439		90.00000000	0.38155556	3.11363810	1.945272
91	0.59928894	7.82238250	4.68786732		91.00000000	0.37736264	2.95187489	1.966633
92	0.60939664	7.33852960	4.47207528		92.00000000	0.37326087	2.73918594	1.988112
93	0.61916649	6.72418880	4.16339238		93.00000000	0.36924731	2.48288864	2.009497
94	0.62926751	5.89650680	3.71048015		94.00000000	0.36531915	2.15410685	2.030990
95	0.63942808	4.83336500	3.09058930		95.00000000	0.36147368	1.74713425	2.052365
96	0.64920759	3.52136230	2.28609513		96.00000000	0.35770833	1.25962064	2.073751
97	0.65932202	1.88357330	1.24188135		97.00000000	0.35402062	0.66682378	2.095239
98	0.66903901	-0.05616667	-0.03757769		98.00000000	0.35040816	-0.01968126	2.116608
99	0.67912591	-2.42648010	-1.64788551		99.00000000	0.34686869	-0.84166997	2.137971
100	0.68886673	-5.11428450	-3.52306044		100.00000000	0.34340000	-1.75624530	2.159344
101	0.69907862	-8.37483790	-5.85467012		101.00000000	0.34000000	-2.84744489	2.180812
06:28 04/04/2018
Test Lot:	JK-PERC
Recipe:	Recipe_YJX-LID
Cell Name:	3-6-7h
Test Order:	4
Test Condition:	Light
1	-0.29988700	9.11410330	-2.73320110		1.00000000	34.34000000	312.97830732	0.000000
2	-0.29009384	9.10161500	-2.64032245		2.00000000	17.17000000	156.27472955	0.061806
3	-0.27994269	9.10278320	-2.54825762		3.00000000	11.44666667	104.19652503	0.083237
4	-0.27015397	9.10094260	-2.45865577		4.00000000	8.58500000	78.13159222	0.104728
5	-0.25998643	9.09680560	-2.36504601		5.00000000	6.86800000	62.47686086	0.126091
6	-0.24985017	9.10795020	-2.27562291		6.00000000	5.72333333	52.12783498	0.147466
7	-0.23997885	9.10047720	-2.18392205		7.00000000	4.90571429	44.64434101	0.168827
8	-0.22990882	9.09258170	-2.09046473		8.00000000	4.29250000	39.02990695	0.190306
9	-0.22009631	9.10631180	-2.00426562		9.00000000	3.81555556	34.74563858	0.211683
10	-0.20991611	9.10602090	-1.91150048		10.00000000	3.43400000	31.27007577	0.233058
11	-0.20007531	9.10606770	-1.82189932		11.00000000	3.12181818	28.42748771	0.254417
12	-0.18995765	9.08259010	-1.72530747		12.00000000	2.86166667	25.99134534	0.275888
13	-0.18014140	9.10465430	-1.64012517		13.00000000	2.64153846	24.05029451	0.297257
14	-0.17000216	9.08973790	-1.54527508		14.00000000	2.45285714	22.29582853	0.318650
15	-0.16015764	9.10580060	-1.45836353		15.00000000	2.28933333	20.84621284	0.340135
16	-0.15004072	9.09750840	-1.36499671		16.00000000	2.14625000	19.52552740	0.361516
17	-0.13986796	9.10091400	-1.27292628		17.00000000	2.02000000	18.38384628	0.382872
18	-0.13004652	9.09363270	-1.18259529		18.00000000	1.90777778	17.34863038	0.404249
19	-0.11993629	9.09504990	-1.09082654		19.00000000	1.80736842	16.43810598	0.425729
20	-0.11010517	9.11489110	-1.00359663		20.00000000	1.71700000	15.65026802	0.447106
21	-0.09995178	9.08487130	-0.90804907		21.00000000	1.63523810	14.85592764	0.468458
22	-0.09011024	9.10335060	-0.82030506		22.00000000	1.56090909	14.20950271	0.489830
23	-0.07996726	9.09721760	-0.72747957		23.00000000	1.49304348	13.58254141	0.511307
24	-0.07014209	9.09516530	-0.63795390		24.00000000	1.43083333	13.01366568	0.532675
25	-0.06002294	9.10696030	-0.54662649		25.00000000	1.37360000	12.50932067	0.554030
26	-0.04986433	9.10265640	-0.45389789		26.00000000	1.32076923	12.02250849	0.575399
27	-0.04003098	9.10060410	-0.36430609		27.00000000	1.27185185	11.57462018	0.596873
28	-0.02992075	9.09832950	-0.27222885		28.00000000	1.22642857	11.15845125	0.618255
29	-0.02001892	9.10247610	-0.18222176		29.00000000	1.18413793	10.77858722	0.639603
30	-0.00994219	9.09642030	-0.09043833		30.00000000	1.14466667	10.41236910	0.660976
31	-0.00062238	9.10987470	-0.00566982		31.00000000	1.10774194	10.09139023	0.682584
32	0.00950326	9.09004970	0.08638515		32.00000000	1.07312500	9.75475958	0.703965
33	0.01931253	9.10252480	0.17579274		33.00000000	1.04060606	9.47214247	0.725305
34	0.02947903	9.09165380	0.26801309		34.00000000	1.01000000	9.18257034	0.746692
35	0.03926149	9.10496620	0.35747454		35.00000000	0.98114286	8.93327255	0.768165
36	0.04944362	9.08909230	0.44939763		36.00000000	0.95388889	8.66998416	0.789547
37	0.05925214	9.10649490	0.53957927		37.00000000	0.92810811	8.45181175	0.810901
38	0.06940896	9.09540560	0.63130265		38.00000000	0.90368421	8.21937443	0.832267
39	0.07952932	9.10618110	0.72420842		39.00000000	0.88051282	8.01810920	0.853754
40	0.08936314	9.09623620	0.81286826		40.00000000	0.85850000	7.80911878	0.875120
41	0.09948275	9.10572720	0.90586280		41.00000000	0.83756098	7.62660176	0.896499
42	0.10932551	9.09863950	0.99471340		42.00000000	0.81761905	7.43922096	0.917851
43	0.11945702	9.09786220	1.08680351		43.00000000	0.79860465	7.26559507	0.939316
44	0.12927820	9.10543540	1.17713430		44.00000000	0.78045455	7.10637845	0.960704
45	0.13943353	9.09220600	1.26775838		45.00000000	0.76311111	6.93836342	0.982091
46	0.14925693	9.10962100	1.35967406		46.00000000	0.74652174	6.80053011	1.003564
47	0.15944576	9.08694270	1.44887448		47.00000000	0.73063830	6.63926835	1.024933
48	0.16951625	9.10326390	1.54315116		48.00000000	0.71541667	6.51262672	1.046294
49	0.17938654	9.09270000	1.63110799		49.00000000	0.70081633	6.37231261	1.067667
50	0.18954262	9.09770200	1.72440227		50.00000000	0.68680000	6.24830173	1.089139
51	0.19929382	9.09130860	1.81184162		51.00000000	0.67333333	6.12148112	1.110510
52	0.20940822	9.10013480	1.90564303		52.00000000	0.66038462	6.00958902	1.131845
53	0.21924949	9.08149720	1.99111363		53.00000000	0.64792453	5.88412479	1.153220
54	0.22937208	9.09810070	2.08685028		54.00000000	0.63592593	5.78571811	1.174711
55	0.23927140	9.11325070	2.18054025		55.00000000	0.62436364	5.68998235	1.196086
56	0.24933891	9.08849620	2.26611574		56.00000000	0.61321429	5.57319571	1.217453
57	0.25956199	9.10274510	2.36272663		57.00000000	0.60245614	5.48400468	1.238833
58	0.26933849	9.09384630	2.44932283		58.00000000	0.59206897	5.38418417	1.260302
59	0.27956602	9.09962270	2.54394530		59.00000000	0.58203390	5.29628887	1.281691
60	0.28932393	9.09193420	2.63051413		60.00000000	0.57233333	5.20361701	1.303037
61	0.29945692	9.09652710	2.72401799		61.00000000	0.56295082	5.12089739	1.324404
62	0.30933020	9.09874150	2.81451553		62.00000000	0.55387097	5.03952876	1.345887
63	0.31945428	9.09588240	2.90571856		63.00000000	0.54507937	4.95797780	1.367256
64	0.32930818	9.10170360	2.99726545		64.00000000	0.53656250	4.88363284	1.388603
65	0.33940697	9.09148690	3.08571402		65.00000000	0.52830769	4.80310246	1.409979
66	0.34923854	9.09166720	3.17516058		66.00000000	0.52030303	4.73042199	1.431447
67	0.35939837	9.08642670	3.26564695		67.00000000	0.51253731	4.65713273	1.452842
68	0.36957601	9.09961890	3.36300085		68.00000000	0.50500000	4.59530754	1.474199
69	0.37935627	9.08237170	3.44545465		69.00000000	0.49768116	4.52012528	1.495556
70	0.38954136	9.09784700	3.54398769		70.00000000	0.49057143	4.46314380	1.517026
71	0.39937517	9.07981110	3.62625110		71.00000000	0.48366197	4.39155934	1.538400
72	0.40945163	9.09274670	3.72303996		72.00000000	0.47694444	4.33673502	1.559778
73	0.41932562	9.07877350	3.80696233		73.00000000	0.47041096	4.27075455	1.581136
74	0.42944300	9.09547230	3.90598691		74.00000000	0.46405405	4.22079079	1.602603
75	0.43926418	9.08346270	3.99003979		75.00000000	0.45786667	4.15901479	1.623970
76	0.44945747	9.08434100	4.08302492		76.00000000	0.45184211	4.10468776	1.645354
77	0.45955327	9.06576250	4.16620080		77.00000000	0.44597403	4.04309460	1.666837
78	0.46942282	9.08171370	4.26316366		78.00000000	0.44025641	3.99828267	1.688217
79	0.47955063	9.06445790	4.34686650		79.00000000	0.43468354	3.94017069	1.709585
80	0.48939115	9.04946800	4.42872955		80.00000000	0.42925000	3.88448414	1.730958
81	0.49952117	9.05073930	4.52103588		81.00000000	0.42395062	3.83706651	1.752429
82	0.50937361	9.03258900	4.60096247		82.00000000	0.41878049	3.78267203	1.773804
83	0.51948577	8.99792670	4.67429488		83.00000000	0.41373494	3.72275666	1.795154
84	0.52915883	8.95649340	4.73940757		84.00000000	0.40880952	3.66149980	1.816525
85	0.53935432	8.92823410	4.81548163		85.00000000	0.40400000	3.60700658	1.838007
86	0.54955208	8.85154250	4.86438359		86.00000000	0.39930233	3.53444151	1.859386
87	0.55935466	8.75395680	4.89656653		87.00000000	0.39471264	3.45529743	1.880744
88	0.56945568	8.61757950	4.90732959		88.00000000	0.39022727	3.36281455	1.902116
89	0.57928354	8.43315410	4.88518736		89.00000000	0.38584270	3.25387092	1.923600
90	0.58944929	8.18343730	4.82372131		90.00000000	0.38155556	3.12243597	1.944995
91	0.59925258	7.82637120	4.68997313		91.00000000	0.37736264	2.95338008	1.966356
92	0.60936773	7.34115600	4.47346357		92.00000000	0.37326087	2.74016627	1.987827
93	0.61919039	6.73382380	4.16951898		93.00000000	0.36924731	2.48644634	2.009335
94	0.62926608	5.90465830	3.71560118		94.00000000	0.36531915	2.15708474	2.030715
95	0.63940287	4.83834740	3.09365321		95.00000000	0.36147368	1.74893526	2.052125
96	0.64914584	3.54045890	2.29827417		96.00000000	0.35770833	1.26645165	2.073520
97	0.65923196	1.87400560	1.23540438		97.00000000	0.35402062	0.66343662	2.095002
98	0.66896605	-0.05830714	-0.03900550		98.00000000	0.35040816	-0.02043130	2.116393
99	0.67909163	-2.44799280	-1.66241142		99.00000000	0.34686869	-0.84913205	2.137765
100	0.68881977	-5.17530250	-3.56485068		100.00000000	0.34340000	-1.77719888	2.159125
101	0.69908524	-8.46752550	-5.91952210		101.00000000	0.34000000	-2.87895867	2.180603
