# Supplementary material for: Study on the Electrical Injection Regeneration of Industrialized B-Doped Czochralski Silicon PERC Solar Cells
Source: Hindawi journal article supplement (doi:10.1155/2019/5357370), 2019-06-20
Supplement: f1 [file 5357370.f1.zip › section3.3/IVRawData_3-6-8h.csv]

07:29 04/04/2018
Test Lot:	JK-PERC
Recipe:	Recipe_YJX-LID
Cell Name:	3-6-8h
Test Order:	2
Test Condition:	Light
1	-0.29991475	9.11081120	-2.73246666		1.00000000	34.34000000	312.86525661	0.000000
2	-0.29011288	9.10814760	-2.64239093		2.00000000	17.17000000	156.38689429	0.061814
3	-0.27996719	9.11170290	-2.55097786		3.00000000	11.44666667	104.29862586	0.083242
4	-0.27015564	9.10803600	-2.46058729		4.00000000	8.58500000	78.19248906	0.104744
5	-0.26000026	9.10800460	-2.36808356		5.00000000	6.86800000	62.55377559	0.126121
6	-0.24981734	9.10950280	-2.27571176		6.00000000	5.72333333	52.13672103	0.147487
7	-0.23998868	9.11024380	-2.18635538		7.00000000	4.90571429	44.69225316	0.168869
8	-0.22987869	9.11166570	-2.09457777		8.00000000	4.29250000	39.11182502	0.190350
9	-0.22006121	9.10015200	-2.00259046		9.00000000	3.81555556	34.72213552	0.211742
10	-0.20988797	9.10782910	-1.91162376		10.00000000	3.43400000	31.27628513	0.233122
11	-0.20006749	9.09695150	-1.82000425		11.00000000	3.12181818	28.39902859	0.254469
12	-0.18992923	9.10549070	-1.72939884		12.00000000	2.86166667	26.05687922	0.275951
13	-0.18014449	9.10499380	-1.64021446		13.00000000	2.64153846	24.05119131	0.297328
14	-0.16998762	9.10481360	-1.54770559		14.00000000	2.45285714	22.33280707	0.318708
15	-0.16016863	9.10829450	-1.45886305		15.00000000	2.28933333	20.85192221	0.340189
16	-0.15004897	9.10737320	-1.36655197		16.00000000	2.14625000	19.54669973	0.361568
17	-0.13987647	9.11589530	-1.27509926		17.00000000	2.02000000	18.41410851	0.382927
18	-0.13005154	9.11289790	-1.18514641		18.00000000	1.90777778	17.38538410	0.404313
19	-0.11996016	9.10710620	-1.09248992		19.00000000	1.80736842	16.45989615	0.425789
20	-0.11007122	9.09603690	-1.00121188		20.00000000	1.71700000	15.61789536	0.447161
21	-0.09996720	9.11327650	-0.91102871		21.00000000	1.63523810	14.90237691	0.468516
22	-0.09011398	9.09450440	-0.81954194		22.00000000	1.56090909	14.19569460	0.489895
23	-0.08002037	9.10224150	-0.72836471		23.00000000	1.49304348	13.59004231	0.511376
24	-0.07018725	9.10791590	-0.63925955		24.00000000	1.43083333	13.03190967	0.532763
25	-0.06002517	9.12351510	-0.54764052		25.00000000	1.37360000	12.53206034	0.554101
26	-0.04985490	9.10291290	-0.45382479		26.00000000	1.32076923	12.02284727	0.575478
27	-0.04007090	9.10587790	-0.36488071		27.00000000	1.27185185	11.58132767	0.596964
28	-0.02991552	9.10006050	-0.27223300		28.00000000	1.22642857	11.16057420	0.618345
29	-0.02010919	9.10568620	-0.18310797		29.00000000	1.18413793	10.78238842	0.639715
30	-0.00993073	9.10976510	-0.09046665		30.00000000	1.14466667	10.42764445	0.661083
31	-0.00067813	9.11626530	-0.00618205		31.00000000	1.10774194	10.09846937	0.682673
32	0.00949863	9.08947280	0.08633749		32.00000000	1.07312500	9.75414050	0.704066
33	0.01929649	9.11799810	0.17594532		33.00000000	1.04060606	9.48824408	0.725411
34	0.02941065	9.09035590	0.26735325		34.00000000	1.01000000	9.18125946	0.746797
35	0.03924572	9.11655620	0.35778582		35.00000000	0.98114286	8.94464400	0.768284
36	0.04941719	9.08517070	0.44896358		36.00000000	0.95388889	8.66624338	0.789666
37	0.05921802	9.11245350	0.53962148		37.00000000	0.92810811	8.45734198	0.811037
38	0.06938726	9.10212140	0.63157124		38.00000000	0.90368421	8.22544339	0.832412
39	0.07953788	9.10392380	0.72410683		39.00000000	0.88051282	8.01612162	0.853895
40	0.08935287	9.11236000	0.81421550		40.00000000	0.85850000	7.82296106	0.875288
41	0.09952135	9.09886070	0.90553094		41.00000000	0.83756098	7.62085064	0.896757
42	0.10930805	9.10571100	0.99532751		42.00000000	0.81761905	7.44500276	0.918119
43	0.11946686	9.12341500	1.08994574		43.00000000	0.79860465	7.28600165	0.939602
44	0.12930268	9.09659580	1.17621422		44.00000000	0.78045455	7.09947954	0.960988
45	0.13944587	9.10124020	1.26913036		45.00000000	0.76311111	6.94525752	0.982373
46	0.14925861	9.10745530	1.35936612		46.00000000	0.74652174	6.79891337	1.003868
47	0.15941966	9.10200120	1.45103794		47.00000000	0.73063830	6.65027066	1.025249
48	0.16955765	9.10731030	1.54421413		48.00000000	0.71541667	6.51552158	1.046598
49	0.17937931	9.10267260	1.63283113		49.00000000	0.70081633	6.37930157	1.067982
50	0.18951654	9.10364340	1.72529100		50.00000000	0.68680000	6.25238229	1.089464
51	0.19930027	9.11241720	1.81610721		51.00000000	0.67333333	6.13569425	1.110849
52	0.20943154	9.10343170	1.90654572		52.00000000	0.66038462	6.01176624	1.132216
53	0.21925546	9.11831190	1.99923967		53.00000000	0.64792453	5.90797794	1.153597
54	0.22942692	9.09790420	2.08730414		54.00000000	0.63592593	5.78559315	1.175075
55	0.23923744	9.09926130	2.17688398		55.00000000	0.62436364	5.68124787	1.196448
56	0.24937689	9.10915950	2.27161387		56.00000000	0.61321429	5.58586674	1.217795
57	0.25950745	9.09069440	2.35910292		57.00000000	0.60245614	5.47674466	1.239171
58	0.26931199	9.11065290	2.45360806		58.00000000	0.59206897	5.39413484	1.260663
59	0.27949536	9.10478210	2.54474435		59.00000000	0.58203390	5.29929182	1.282050
60	0.28931481	9.09976480	2.63269672		60.00000000	0.57233333	5.20809872	1.303414
61	0.29945725	9.09922790	2.72482976		61.00000000	0.56295082	5.12241780	1.324792
62	0.30929306	9.09835340	2.81405756		62.00000000	0.55387097	5.03931380	1.346275
63	0.31942731	9.10456470	2.90824661		63.00000000	0.54507937	4.96271035	1.367668
64	0.32926390	9.10246180	2.99711207		64.00000000	0.53656250	4.88403966	1.389018
65	0.33941898	9.10231020	3.08949684		65.00000000	0.52830769	4.80882050	1.410401
66	0.34921685	9.10643200	3.18011950		66.00000000	0.52030303	4.73810416	1.431890
67	0.35935408	9.09029580	3.26663488		67.00000000	0.51253731	4.65911579	1.453274
68	0.36952034	9.09565260	3.36102864		68.00000000	0.50500000	4.59330456	1.474648
69	0.37932339	9.09503170	3.44995826		69.00000000	0.49768116	4.52642592	1.496011
70	0.38948369	9.09523200	3.54244452		70.00000000	0.49057143	4.46186096	1.517484
71	0.39932549	9.09814640	3.63312177		71.00000000	0.48366197	4.40042743	1.538877
72	0.40944707	9.09576320	3.72423359		72.00000000	0.47694444	4.33817373	1.560257
73	0.41930300	9.09597680	3.81397036		73.00000000	0.47041096	4.27884717	1.581639
74	0.42942980	9.08587460	3.90174531		74.00000000	0.46405405	4.21633694	1.603127
75	0.43924925	9.08753400	3.99169249		75.00000000	0.45786667	4.16087890	1.624520
76	0.44941178	9.08014680	4.08072494		76.00000000	0.45184211	4.10279265	1.645910
77	0.45953488	9.08638190	4.17550942		77.00000000	0.44597403	4.05229032	1.667398
78	0.46942130	9.07097150	4.25810723		78.00000000	0.44025641	3.99355335	1.688770
79	0.47957194	9.07090000	4.35014911		79.00000000	0.43468354	3.94297096	1.710119
80	0.48938096	9.06908420	4.43823713		80.00000000	0.42925000	3.89290439	1.731498
81	0.49948022	9.04703430	4.51881468		81.00000000	0.42395062	3.83549578	1.752988
82	0.50933689	9.01984790	4.59414128		82.00000000	0.41878049	3.77733630	1.774381
83	0.51946223	9.00598430	4.67826869		83.00000000	0.41373494	3.72609037	1.795733
84	0.52922732	8.95053290	4.73686654		84.00000000	0.40880952	3.65906309	1.817114
85	0.53939134	8.91895100	4.81080493		85.00000000	0.40400000	3.60325620	1.838597
86	0.54955685	8.83351990	4.85452137		86.00000000	0.39930233	3.52724504	1.859976
87	0.55934358	8.73500920	4.88587132		87.00000000	0.39471264	3.44781857	1.881332
88	0.56948972	8.58888150	4.89127972		88.00000000	0.39022727	3.35161580	1.902721
89	0.57926303	8.40728950	4.87003199		89.00000000	0.38584270	3.24389125	1.924210
90	0.58938611	8.11752610	4.78435713		90.00000000	0.38155556	3.09728718	1.945582
91	0.59919363	7.77363300	4.65791138		91.00000000	0.37736264	2.93347865	1.966937
92	0.60926986	7.25566910	4.42066050		92.00000000	0.37326087	2.70825736	1.988397
93	0.61912799	6.64842410	4.11622545		93.00000000	0.36924731	2.45491273	2.009935
94	0.62919974	5.79328300	3.64513216		94.00000000	0.36531915	2.11639722	2.031348
95	0.63933992	4.73735000	3.02877697		95.00000000	0.36147368	1.71242736	2.052702
96	0.64913929	3.43465950	2.22957243		96.00000000	0.35770833	1.22860633	2.074076
97	0.65921402	1.82533570	1.20328688		97.00000000	0.35402062	0.64620647	2.095558
98	0.66895604	-0.06619409	-0.04428093		98.00000000	0.35040816	-0.02319495	2.116949
99	0.67904568	-2.34209820	-1.59039166		99.00000000	0.34686869	-0.81240053	2.138322
100	0.68877727	-4.91029310	-3.38209828		100.00000000	0.34340000	-1.68619465	2.159686
101	0.69904923	-7.97950170	-5.57806452		101.00000000	0.34000000	-2.71303058	2.181168
07:29 04/04/2018
Test Lot:	JK-PERC
Recipe:	Recipe_YJX-LID
Cell Name:	3-6-8h
Test Order:	3
Test Condition:	Light
1	-0.29994610	9.10873510	-2.73212957		1.00000000	34.34000000	312.79396333	0.000000
2	-0.29011297	9.10228440	-2.64069076		2.00000000	17.17000000	156.28622315	0.061792
3	-0.27997991	9.11249640	-2.55131592		3.00000000	11.44666667	104.30770879	0.083260
4	-0.27013043	9.10011860	-2.45821895		4.00000000	8.58500000	78.12451818	0.104773
5	-0.25998992	9.10575770	-2.36740522		5.00000000	6.86800000	62.53834388	0.126155
6	-0.24984570	9.10056880	-2.27373798		6.00000000	5.72333333	52.08558877	0.147507
7	-0.24000141	9.10751150	-2.18581560		7.00000000	4.90571429	44.67884927	0.168884
8	-0.22987653	9.10847950	-2.09382566		8.00000000	4.29250000	39.09814825	0.190378
9	-0.22003075	9.09747980	-2.00172530		9.00000000	3.81555556	34.71193959	0.211759
10	-0.20990589	9.10579970	-1.91136099		10.00000000	3.43400000	31.26931617	0.233125
11	-0.20009434	9.10204790	-1.82126827		11.00000000	3.12181818	28.41493863	0.254508
12	-0.18993524	9.10140710	-1.72867794		12.00000000	2.86166667	26.04519332	0.275989
13	-0.18011254	9.10912040	-1.64066681		13.00000000	2.64153846	24.06209189	0.297385
14	-0.16997799	9.11554050	-1.54944125		14.00000000	2.45285714	22.35911863	0.318798
15	-0.16017464	9.09030720	-1.45603668		15.00000000	2.28933333	20.81074328	0.340174
16	-0.14997385	9.10180760	-1.36503313		16.00000000	2.14625000	19.53475456	0.361653
17	-0.13983111	9.11002640	-1.27386510		17.00000000	2.02000000	18.40225333	0.383029
18	-0.13003521	9.10298730	-1.18370887		18.00000000	1.90777778	17.36647688	0.404419
19	-0.11988652	9.10978790	-1.09214077		19.00000000	1.80736842	16.46474297	0.425774
20	-0.11006232	9.10813240	-1.00246218		20.00000000	1.71700000	15.63866333	0.447242
21	-0.09989801	9.10165020	-0.90923674		21.00000000	1.63523810	14.88336514	0.468637
22	-0.09006117	9.10169700	-0.81970944		22.00000000	1.56090909	14.20692159	0.490014
23	-0.07993406	9.10290720	-0.72763234		23.00000000	1.49304348	13.59103623	0.511495
24	-0.07009573	9.10026840	-0.63788991		24.00000000	1.43083333	13.02096737	0.532891
25	-0.05995002	9.10319900	-0.54573693		25.00000000	1.37360000	12.50415415	0.554234
26	-0.04980728	9.10133360	-0.45331267		26.00000000	1.32076923	12.02076138	0.575627
27	-0.04000170	9.10051060	-0.36403588		27.00000000	1.27185185	11.57450126	0.597117
28	-0.02984482	9.10167690	-0.27163791		28.00000000	1.22642857	11.16255660	0.618503
29	-0.02000723	9.10898880	-0.18224565		29.00000000	1.18413793	10.78629915	0.639903
30	-0.00989427	9.10845090	-0.09012146		30.00000000	1.14466667	10.42614013	0.661284
31	-0.00061711	9.10189440	-0.00561683		31.00000000	1.10774194	10.08255012	0.682891
32	0.00949118	9.09848980	0.08635545		32.00000000	1.07312500	9.76381687	0.704293
33	0.01933594	9.09635640	0.17588656		33.00000000	1.04060606	9.46572360	0.725716
34	0.02945010	9.12111470	0.26861774		34.00000000	1.01000000	9.21232585	0.747114
35	0.03930378	9.09853650	0.35760688		35.00000000	0.98114286	8.92696410	0.768603
36	0.04944995	9.11046890	0.45051220		36.00000000	0.95388889	8.69037506	0.789978
37	0.05925972	9.08766370	0.53853241		37.00000000	0.92810811	8.43433436	0.811322
38	0.06941184	9.11885360	0.63295638		38.00000000	0.90368421	8.24056402	0.832723
39	0.07956917	9.09799190	0.72391965		39.00000000	0.88051282	8.01089851	0.854207
40	0.08937597	9.10222820	0.81352043		40.00000000	0.85850000	7.81426291	0.875584
41	0.09954371	9.10275360	0.90612189		41.00000000	0.83756098	7.62411119	0.896946
42	0.10934604	9.11076740	0.99622634		42.00000000	0.81761905	7.44913696	0.918330
43	0.11949221	9.10815050	1.08835303		43.00000000	0.79860465	7.27381135	0.939807
44	0.12931687	9.09567550	1.17622429		44.00000000	0.78045455	7.09876129	0.961181
45	0.13947345	9.10823060	1.27035635		45.00000000	0.76311111	6.95059197	0.982550
46	0.14928322	9.09135150	1.35718623		46.00000000	0.74652174	6.78689153	1.003926
47	0.15943386	9.09189890	1.44955654		47.00000000	0.73063830	6.64288954	1.025421
48	0.16960680	9.09660050	1.54284530		48.00000000	0.71541667	6.50785961	1.046797
49	0.17940840	9.09335420	1.63142413		49.00000000	0.70081633	6.37277109	1.068197
50	0.18955679	9.10888000	1.72665005		50.00000000	0.68680000	6.25597878	1.089568
51	0.19933605	9.09540840	1.81304278		51.00000000	0.67333333	6.12424166	1.111045
52	0.20949636	9.10891340	1.90828420		52.00000000	0.66038462	6.01538627	1.132433
53	0.21934409	9.09653850	1.99527196		53.00000000	0.64792453	5.89387042	1.153820
54	0.22946942	9.10016350	2.08820924		54.00000000	0.63592593	5.78702990	1.175296
55	0.23928440	9.10699460	2.17916174		55.00000000	0.62436364	5.68607626	1.196694
56	0.24942759	9.09883310	2.26950001		56.00000000	0.61321429	5.57953444	1.218043
57	0.25956258	9.11098290	2.36487023		57.00000000	0.60245614	5.48896759	1.239423
58	0.26939395	9.09418680	2.44991890		58.00000000	0.59206897	5.38438577	1.260919
59	0.27956542	9.10377030	2.54509937		59.00000000	0.58203390	5.29870292	1.282293
60	0.28938562	9.09800050	2.63283052		60.00000000	0.57233333	5.20708895	1.303651
61	0.29950127	9.10819440	2.72791579		61.00000000	0.56295082	5.12746550	1.325036
62	0.30934379	9.10331250	2.81605319		62.00000000	0.55387097	5.04206050	1.346532
63	0.31945944	9.09500980	2.90548674		63.00000000	0.54507937	4.95750217	1.367927
64	0.32930714	9.09643840	2.99552211		64.00000000	0.53656250	4.88080773	1.389280
65	0.33943471	9.08794020	3.08476235		65.00000000	0.52830769	4.80122871	1.410662
66	0.34926903	9.11285020	3.18283635		66.00000000	0.52030303	4.74144357	1.432150
67	0.35938990	9.09353450	3.26812445		67.00000000	0.51253731	4.66077574	1.453539
68	0.36954799	9.09781170	3.36207803		68.00000000	0.50500000	4.59439491	1.474884
69	0.37940016	9.09611990	3.45106935		69.00000000	0.49768116	4.52696750	1.496270
70	0.38952029	9.09321400	3.54199135		70.00000000	0.49057143	4.46087098	1.517765
71	0.39937845	9.09473610	3.63224161		71.00000000	0.48366197	4.39877800	1.539138
72	0.40951568	9.08961960	3.72234175		72.00000000	0.47694444	4.33524357	1.560504
73	0.41931280	9.09205440	3.81241479		73.00000000	0.47041096	4.27700203	1.581890
74	0.42946342	9.09804060	3.90727563		74.00000000	0.46405405	4.22198262	1.603361
75	0.43929255	9.08427910	3.99065613		75.00000000	0.45786667	4.15938859	1.624742
76	0.44942978	9.09579090	4.08791930		76.00000000	0.45184211	4.10986131	1.646103
77	0.45958117	9.06976600	4.16829367		77.00000000	0.44597403	4.04488006	1.667478
78	0.46944377	9.07104970	4.25834777		78.00000000	0.44025641	3.99358778	1.688959
79	0.47960779	9.07949730	4.35459763		79.00000000	0.43468354	3.94670807	1.710332
80	0.48938856	9.05195710	4.42992425		80.00000000	0.42925000	3.88555259	1.731728
81	0.49953619	9.04459100	4.51810053		81.00000000	0.42395062	3.83445994	1.753084
82	0.50934893	9.03346920	4.60118787		82.00000000	0.41878049	3.78304064	1.774559
83	0.51952416	8.99374770	4.67246922		83.00000000	0.41373494	3.72102766	1.795948
84	0.52928776	8.97958660	4.75278528		84.00000000	0.40880952	3.67094052	1.817338
85	0.53943318	8.91100310	4.80689074		85.00000000	0.40400000	3.60004525	1.838828
86	0.54959649	8.85248470	4.86529452		86.00000000	0.39930233	3.53481773	1.860217
87	0.55937278	8.74269390	4.89042499		87.00000000	0.39471264	3.45085182	1.881571
88	0.56953007	8.61324880	4.90550419		88.00000000	0.39022727	3.36112459	1.902943
89	0.57931679	8.41622640	4.87566126		89.00000000	0.38584270	3.24733949	1.924429
90	0.58945996	8.14992140	4.80405234		90.00000000	0.38155556	3.10964779	1.945813
91	0.59925264	7.82354160	4.68827796		91.00000000	0.37736264	2.95231229	1.967169
92	0.60934371	7.30442430	4.45090500		92.00000000	0.37326087	2.72645577	1.988650
93	0.61917579	6.70375300	4.15080156		93.00000000	0.36924731	2.47534277	2.010147
94	0.62924159	5.85933490	3.68693721		94.00000000	0.36531915	2.14052724	2.031544
95	0.63937366	4.78109070	3.05690346		95.00000000	0.36147368	1.72823847	2.052890
96	0.64918786	3.49158190	2.26669258		96.00000000	0.35770833	1.24896794	2.074264
97	0.65924251	1.83962310	1.21275775		97.00000000	0.35402062	0.65126451	2.095801
98	0.66900539	-0.08299227	-0.05552228		98.00000000	0.35040816	-0.02908117	2.117186
99	0.67912924	-2.44793750	-1.66246593		99.00000000	0.34686869	-0.84911287	2.138539
100	0.68882215	-5.11015560	-3.51998837		100.00000000	0.34340000	-1.75482743	2.159930
101	0.69905019	-8.34288790	-5.83209737		101.00000000	0.34000000	-2.83658189	2.181409
07:29 04/04/2018
Test Lot:	JK-PERC
Recipe:	Recipe_YJX-LID
Cell Name:	3-6-8h
Test Order:	4
Test Condition:	Light
1	-0.29991612	9.10932540	-2.73203353		1.00000000	34.34000000	312.81423424	0.000000
2	-0.29010236	9.10087780	-2.64018613		2.00000000	17.17000000	156.26207183	0.061779
3	-0.27998272	9.10572050	-2.54944439		3.00000000	11.44666667	104.23014732	0.083268
4	-0.27015033	9.09251310	-2.45634541		4.00000000	8.58500000	78.05922496	0.104713
5	-0.25999346	9.11547850	-2.36996479		5.00000000	6.86800000	62.60510634	0.126087
6	-0.24982692	9.10541820	-2.27477858		6.00000000	5.72333333	52.11334350	0.147463
7	-0.23998562	9.10987760	-2.18623962		7.00000000	4.90571429	44.69045668	0.169017
8	-0.22981833	9.10746960	-2.09306345		8.00000000	4.29250000	39.09381326	0.190428
9	-0.22001052	9.09835430	-2.00173366		9.00000000	3.81555556	34.71527630	0.211784
10	-0.20986779	9.10366440	-1.91056593		10.00000000	3.43400000	31.26198355	0.233161
11	-0.20005551	9.09882640	-1.82027036		11.00000000	3.12181818	28.40488169	0.254645
12	-0.18989195	9.09175490	-1.72645107		12.00000000	2.86166667	26.01757194	0.276023
13	-0.18011615	9.10981750	-1.64082526		13.00000000	2.64153846	24.06393330	0.297393
14	-0.16996224	9.09837910	-1.54638089		14.00000000	2.45285714	22.31702416	0.318774
15	-0.16014253	9.09949590	-1.45721630		15.00000000	2.28933333	20.83177928	0.340247
16	-0.15004669	9.09506610	-1.36468456		16.00000000	2.14625000	19.52028562	0.361627
17	-0.13984740	9.10368440	-1.27312659		17.00000000	2.02000000	18.38944249	0.382973
18	-0.13005224	9.10546020	-1.18418550		18.00000000	1.90777778	17.37119463	0.404346
19	-0.11990727	9.09580900	-1.09065363		19.00000000	1.80736842	16.43947795	0.425828
20	-0.11009053	9.10295010	-1.00214860		20.00000000	1.71700000	15.62976532	0.447200
21	-0.09991729	9.10286330	-0.90953346		21.00000000	1.63523810	14.88534884	0.468561
22	-0.09007822	9.10360620	-0.82003664		22.00000000	1.56090909	14.20990168	0.489943
23	-0.07996601	9.10420230	-0.72802672		23.00000000	1.49304348	13.59296987	0.511425
24	-0.07013885	9.09955880	-0.63823258		24.00000000	1.43083333	13.01995205	0.532821
25	-0.05998868	9.09806060	-0.54578063		25.00000000	1.37360000	12.49709604	0.554173
26	-0.04986381	9.09927370	-0.45372447		26.00000000	1.32076923	12.01804073	0.575547
27	-0.04002400	9.10669040	-0.36448615		27.00000000	1.27185185	11.58236105	0.597026
28	-0.02989616	9.10682680	-0.27225911		28.00000000	1.22642857	11.16887258	0.618399
29	-0.02007643	9.08446880	-0.18238373		29.00000000	1.18413793	10.75726409	0.639741
30	-0.00992478	9.10693360	-0.09038428		30.00000000	1.14466667	10.42440333	0.661119
31	-0.00065283	9.09685710	-0.00593868		31.00000000	1.10774194	10.07697009	0.682708
32	0.00948225	9.11116600	0.08639435		32.00000000	1.07312500	9.77742001	0.704085
33	0.01933071	9.09894470	0.17588910		33.00000000	1.04060606	9.46841700	0.725467
34	0.02944190	9.08881470	0.26759193		34.00000000	1.01000000	9.17970285	0.746805
35	0.03930748	9.09766480	0.35760627		35.00000000	0.98114286	8.92610884	0.768272
36	0.04941940	9.10734460	0.45007953		36.00000000	0.95388889	8.68739482	0.789664
37	0.05927010	9.08473400	0.53845312		37.00000000	0.92810811	8.43161529	0.811042
38	0.06940287	9.10942080	0.63221991		38.00000000	0.90368421	8.23203974	0.832455
39	0.07954083	9.09638790	0.72353428		39.00000000	0.88051282	8.00948617	0.853934
40	0.08937219	9.10213760	0.81347795		40.00000000	0.85850000	7.81418513	0.875305
41	0.09954365	9.09490590	0.90534009		41.00000000	0.83756098	7.61753826	0.896674
42	0.10935267	9.09951590	0.99505636		42.00000000	0.81761905	7.43993752	0.918042
43	0.11951520	9.09663870	1.08718659		43.00000000	0.79860465	7.26461798	0.939532
44	0.12933464	9.09689710	1.17654391		44.00000000	0.78045455	7.09971469	0.960921
45	0.13948900	9.10783670	1.27044303		45.00000000	0.76311111	6.95029138	0.982283
46	0.14927791	9.10466580	1.35912548		46.00000000	0.74652174	6.79683095	1.003639
47	0.15943152	9.08973220	1.44918982		47.00000000	0.73063830	6.64130646	1.025110
48	0.16959256	9.10757640	1.54457720		48.00000000	0.71541667	6.51571195	1.046488
49	0.17939042	9.09680370	1.63187944		49.00000000	0.70081633	6.37518855	1.067870
50	0.18954328	9.09190180	1.72330889		50.00000000	0.68680000	6.24431816	1.089219
51	0.19933815	9.09217260	1.81241687		51.00000000	0.67333333	6.12206288	1.110688
52	0.20946646	9.10745620	1.90770661		52.00000000	0.66038462	6.01442396	1.132077
53	0.21929632	9.10358810	1.99638337		53.00000000	0.64792453	5.89843803	1.153458
54	0.22944099	9.08563520	2.08461714		54.00000000	0.63592593	5.77779098	1.174941
55	0.23928350	9.10102080	2.17772411		55.00000000	0.62436364	5.68234644	1.196326
56	0.24943040	9.11171720	2.27273927		56.00000000	0.61321429	5.58743515	1.217673
57	0.25954530	9.10461240	2.36305936		57.00000000	0.60245614	5.48512965	1.239052
58	0.26937443	9.08763980	2.44797779		58.00000000	0.59206897	5.38050950	1.260534
59	0.27951387	9.11079600	2.54659385		59.00000000	0.58203390	5.30279211	1.281923
60	0.28934151	9.09842590	2.63255229		60.00000000	0.57233333	5.20733242	1.303270
61	0.29949436	9.10197540	2.72599030		61.00000000	0.56295082	5.12396451	1.324652
62	0.30931902	9.09515670	2.81330496		62.00000000	0.55387097	5.03754324	1.346142
63	0.31945625	9.09331700	2.90491695		63.00000000	0.54507937	4.95657946	1.367513
64	0.32928684	9.10689350	2.99878018		64.00000000	0.53656250	4.88641754	1.388871
65	0.33945236	9.10147000	3.08951547		65.00000000	0.52830769	4.80837661	1.410247
66	0.34925914	9.08932880	3.17453116		66.00000000	0.52030303	4.72920532	1.431726
67	0.35936734	9.10000610	3.27024499		67.00000000	0.51253731	4.66409268	1.453098
68	0.36956114	9.10655310	3.36542815		68.00000000	0.50500000	4.59880932	1.474442
69	0.37936196	9.09643460	3.45084126		69.00000000	0.49768116	4.52712412	1.495822
70	0.38950440	9.09539700	3.54269715		70.00000000	0.49057143	4.46194190	1.517300
71	0.39935735	9.09296320	3.63134169		71.00000000	0.48366197	4.39792051	1.538686
72	0.40948564	9.09237100	3.72319536		72.00000000	0.47694444	4.33655584	1.560060
73	0.41933039	9.09549710	3.81401835		73.00000000	0.47041096	4.27862151	1.581437
74	0.42945868	9.08383460	3.90113162		74.00000000	0.46405405	4.21539027	1.602923
75	0.43931532	9.08998110	3.99336796		75.00000000	0.45786667	4.16199935	1.624307
76	0.44942281	9.08380790	4.08247047		76.00000000	0.45184211	4.10444689	1.645673
77	0.45957342	9.07144450	4.16899477		77.00000000	0.44597403	4.04562863	1.667041
78	0.46944943	9.07538510	4.26043436		78.00000000	0.44025641	3.99549647	1.688518
79	0.47957474	9.06642630	4.34802904		79.00000000	0.43468354	3.94102632	1.709888
80	0.48941949	9.06706050	4.43759613		80.00000000	0.42925000	3.89203572	1.731270
81	0.49951428	9.04274750	4.51698151		81.00000000	0.42395062	3.83367838	1.752606
82	0.50933594	9.01940350	4.59390636		82.00000000	0.41878049	3.77715020	1.774071
83	0.51950371	9.00781250	4.67959201		83.00000000	0.41373494	3.72684676	1.795469
84	0.52928591	8.95931910	4.74204136		84.00000000	0.40880952	3.66265497	1.816860
85	0.53941125	8.91581630	4.80929162		85.00000000	0.40400000	3.60198979	1.838341
86	0.54955298	8.84685330	4.86181459		86.00000000	0.39930233	3.53256910	1.859717
87	0.55938578	8.74926570	4.89421482		87.00000000	0.39471264	3.45344579	1.881059
88	0.56948209	8.61096380	4.90378966		88.00000000	0.39022727	3.36023292	1.902427
89	0.57933575	8.42417340	4.88042481		89.00000000	0.38584270	3.25040578	1.923910
90	0.58943951	8.15379430	4.80616852		90.00000000	0.38155556	3.11112551	1.945287
91	0.59922546	7.79733940	4.67236429		91.00000000	0.37736264	2.94242456	1.966630
92	0.60933959	7.32390590	4.46274582		92.00000000	0.37326087	2.73372748	1.988114
93	0.61914641	6.68503090	4.13901288		93.00000000	0.36924731	2.46842969	2.009611
94	0.62927616	5.85671520	3.68549125		94.00000000	0.36531915	2.13957021	2.031003
95	0.63937843	4.77561430	3.05342477		95.00000000	0.36147368	1.72625890	2.052414
96	0.64915472	3.47397610	2.25514798		96.00000000	0.35770833	1.24267020	2.073797
97	0.65928525	1.83104830	1.20718314		97.00000000	0.35402062	0.64822885	2.095269
98	0.66900343	-0.09498391	-0.06354456		98.00000000	0.35040816	-0.03328314	2.116647
99	0.67909974	-2.43634510	-1.65452132		99.00000000	0.34686869	-0.84509183	2.137986
100	0.68877554	-5.11226750	-3.52120481		100.00000000	0.34340000	-1.75555266	2.159364
101	0.69905865	-8.32099060	-5.81686046		101.00000000	0.34000000	-2.82913680	2.180860
