# Supplementary material for: Study on the Electrical Injection Regeneration of Industrialized B-Doped Czochralski Silicon PERC Solar Cells
Source: Hindawi journal article supplement (doi:10.1155/2019/5357370), 2019-06-20
Supplement: f1 [file 5357370.f1.zip › section3.3/IVRawData_3-6-9h.csv]

08:30 04/04/2018
Test Lot:	JK-PERC
Recipe:	Recipe_YJX-LID
Cell Name:	3-6-9h
Test Order:	2
Test Condition:	Light
1	-0.29995462	9.07951640	-2.72344289		1.00000000	34.34000000	311.79059318	0.000000
2	-0.29012904	9.10223870	-2.64082378		2.00000000	17.17000000	156.28543848	0.061799
3	-0.28000799	9.09168430	-2.54574425		3.00000000	11.44666667	104.06947962	0.083212
4	-0.27017421	9.08550260	-2.45466849		4.00000000	8.58500000	77.99903982	0.104745
5	-0.26002708	9.08800320	-2.36312694		5.00000000	6.86800000	62.41640598	0.126135
6	-0.24987403	9.10008720	-2.27387546		6.00000000	5.72333333	52.08283241	0.147532
7	-0.24004321	9.08975030	-2.18193284		7.00000000	4.90571429	44.59171790	0.168900
8	-0.22988792	9.08728030	-2.08905597		8.00000000	4.29250000	39.00715069	0.190385
9	-0.22008093	9.09244060	-2.00107278		9.00000000	3.81555556	34.69271224	0.211766
10	-0.20992489	9.09729860	-1.90974941		10.00000000	3.43400000	31.24012339	0.233155
11	-0.20011045	9.08642580	-1.81828876		11.00000000	3.12181818	28.36616927	0.254552
12	-0.18998270	9.10880760	-1.73051586		12.00000000	2.86166667	26.06637108	0.276022
13	-0.18014742	9.07647040	-1.63510273		13.00000000	2.64153846	23.97584566	0.297412
14	-0.17000031	9.09704490	-1.54650045		14.00000000	2.45285714	22.31375156	0.318780
15	-0.16020076	9.09403230	-1.45687089		15.00000000	2.28933333	20.81927128	0.340139
16	-0.15006185	9.08662800	-1.36355621		16.00000000	2.14625000	19.50217535	0.361627
17	-0.13991845	9.09421630	-1.27244865		17.00000000	2.02000000	18.37031693	0.383006
18	-0.13006607	9.09187980	-1.18254507		18.00000000	1.90777778	17.34528624	0.404359
19	-0.11992119	9.09681800	-1.09090124		19.00000000	1.80736842	16.44130159	0.425734
20	-0.11010973	9.08404920	-1.00024220		20.00000000	1.71700000	15.59731248	0.447214
21	-0.09994922	9.09627530	-0.90916560		21.00000000	1.63523810	14.87457590	0.468596
22	-0.09014075	9.08899780	-0.81928903		22.00000000	1.56090909	14.18709929	0.489980
23	-0.07999437	9.09823510	-0.72780761		23.00000000	1.49304348	13.58406058	0.511318
24	-0.07018665	9.08877750	-0.63791080		24.00000000	1.43083333	13.00452581	0.532786
25	-0.06001050	9.08582690	-0.54524505		25.00000000	1.37360000	12.48029183	0.554177
26	-0.04989167	9.09848020	-0.45393840		26.00000000	1.32076923	12.01699269	0.575560
27	-0.04002366	9.08478360	-0.36360627		27.00000000	1.27185185	11.55449885	0.597040
28	-0.02989813	9.09694480	-0.27198163		28.00000000	1.22642857	11.15675302	0.618490
29	-0.02008295	9.09135720	-0.18258129		29.00000000	1.18413793	10.76542091	0.639862
30	-0.00998199	9.09071160	-0.09074335		30.00000000	1.14466667	10.40583454	0.661249
31	-0.00065727	9.08923820	-0.00597409		31.00000000	1.10774194	10.06853032	0.682721
32	0.00947549	9.09191610	0.08615039		32.00000000	1.07312500	9.75676246	0.704217
33	0.01931569	9.08720870	0.17552572		33.00000000	1.04060606	9.45620445	0.725609
34	0.02941786	9.10697170	0.26790763		34.00000000	1.01000000	9.19804142	0.746998
35	0.03927220	9.08813670	0.35691112		35.00000000	0.98114286	8.91676041	0.768359
36	0.04936693	9.09501550	0.44899298		36.00000000	0.95388889	8.67563423	0.789827
37	0.05920415	9.08163070	0.53767023		37.00000000	0.92810811	8.42873509	0.811211
38	0.06937181	9.10433010	0.63158388		38.00000000	0.90368421	8.22743936	0.832598
39	0.07952384	9.08099840	0.72215585		39.00000000	0.88051282	7.99593551	0.853953
40	0.08934395	9.10203170	0.81321147		40.00000000	0.85850000	7.81409421	0.875433
41	0.09949598	9.09795280	0.90520970		41.00000000	0.83756098	7.62009022	0.896812
42	0.10928632	9.08983230	0.99339432		42.00000000	0.81761905	7.43202003	0.918196
43	0.11943314	9.08642390	1.08522014		43.00000000	0.79860465	7.25646039	0.939677
44	0.12929046	9.09694670	1.17614842		44.00000000	0.78045455	7.09975340	0.961063
45	0.13944845	9.08647920	1.26709544		45.00000000	0.76311111	6.93399324	0.982410
46	0.14925218	9.10960010	1.35962767		46.00000000	0.74652174	6.80051451	1.003780
47	0.15940420	9.09013270	1.44900533		47.00000000	0.73063830	6.64159908	1.025263
48	0.16956219	9.07404040	1.53861416		48.00000000	0.71541667	6.49171974	1.046648
49	0.17937262	9.10291100	1.63281300		49.00000000	0.70081633	6.37946865	1.068006
50	0.18952391	9.09718320	1.72413373		50.00000000	0.68680000	6.24794542	1.089376
51	0.19930382	9.09824850	1.81331568		51.00000000	0.67333333	6.12615399	1.110860
52	0.20945214	9.08387370	1.90263679		52.00000000	0.66038462	5.99885044	1.132235
53	0.21926406	9.09223650	1.99360069		53.00000000	0.64792453	5.89108305	1.153579
54	0.22940120	9.08344170	2.08375243		54.00000000	0.63592593	5.77639607	1.174955
55	0.23922801	9.08925440	2.17440424		55.00000000	0.62436364	5.67499993	1.196417
56	0.24938674	9.08489510	2.26565237		56.00000000	0.61321429	5.57098746	1.217783
57	0.25950825	9.08084490	2.35655417		57.00000000	0.60245614	5.47081077	1.239115
58	0.26936111	9.10449500	2.45239688		58.00000000	0.59206897	5.39048894	1.260502
59	0.27950719	9.08154770	2.53835788		59.00000000	0.58203390	5.28576861	1.281988
60	0.28931537	9.08848380	2.62943805		60.00000000	0.57233333	5.20164223	1.303371
61	0.29948157	9.08244230	2.72002408		61.00000000	0.56295082	5.11296834	1.324731
62	0.30929050	9.10056500	2.81471830		62.00000000	0.55387097	5.04053874	1.346105
63	0.31941798	9.09111020	2.90386406		63.00000000	0.54507937	4.95537658	1.367634
64	0.32923287	9.07081320	2.98640986		64.00000000	0.53656250	4.86705821	1.389005
65	0.33937895	9.09423450	3.08639176		65.00000000	0.52830769	4.80455404	1.410363
66	0.34916705	9.08699800	3.17288029		66.00000000	0.52030303	4.72799260	1.431745
67	0.35936224	9.09189610	3.26728415		67.00000000	0.51253731	4.65993600	1.453227
68	0.36950609	9.08830830	3.35818526		68.00000000	0.50500000	4.58959569	1.474601
69	0.37933439	9.07339290	3.44184996		69.00000000	0.49768116	4.51565670	1.495994
70	0.38947600	9.08501530	3.53839542		70.00000000	0.49057143	4.45684893	1.517334
71	0.39928940	9.08188630	3.62630093		71.00000000	0.48366197	4.39256304	1.538813
72	0.40944591	9.07663060	3.71638928		72.00000000	0.47694444	4.32904854	1.560208
73	0.41926304	9.07415390	3.80445735		73.00000000	0.47041096	4.26858144	1.581591
74	0.42940614	9.08754250	3.90224655		74.00000000	0.46405405	4.21711094	1.603088
75	0.43923813	9.06682400	3.98249482		75.00000000	0.45786667	4.15139648	1.624475
76	0.44937232	9.07158570	4.07651951		76.00000000	0.45184211	4.09892438	1.645825
77	0.45953700	9.06452940	4.16548665		77.00000000	0.44597403	4.04254467	1.667198
78	0.46941292	9.06694790	4.25614249		78.00000000	0.44025641	3.99178193	1.688673
79	0.47954410	9.06297590	4.34609662		79.00000000	0.43468354	3.93952649	1.710061
80	0.48934487	9.04904170	4.42810213		80.00000000	0.42925000	3.88430115	1.731411
81	0.49949542	9.03362080	4.51225222		81.00000000	0.42395062	3.82980911	1.752790
82	0.50931627	9.02053830	4.59430692		82.00000000	0.41878049	3.77762543	1.774271
83	0.51944226	8.98450470	4.66693143		83.00000000	0.41373494	3.71720351	1.795655
84	0.52923781	8.95320800	4.73837619		84.00000000	0.40880952	3.66015670	1.817005
85	0.53936452	8.91525650	4.80857304		85.00000000	0.40400000	3.60176363	1.838371
86	0.54953367	8.82606790	4.85022148		86.00000000	0.39930233	3.52426944	1.859858
87	0.55933887	8.73280720	4.88459851		87.00000000	0.39471264	3.44694942	1.881235
88	0.56946564	8.58340450	4.88795394		88.00000000	0.39022727	3.34947853	1.902569
89	0.57927233	8.39165400	4.86105297		89.00000000	0.38584270	3.23785841	1.923954
90	0.58939308	8.12422850	4.78836406		90.00000000	0.38155556	3.09984452	1.945432
91	0.59921318	7.77129460	4.65666215		91.00000000	0.37736264	2.93259623	1.966850
92	0.60933620	7.26641990	4.42769269		92.00000000	0.37326087	2.71227021	1.988323
93	0.61913699	6.63572650	4.10842373		93.00000000	0.36924731	2.45022417	2.009717
94	0.62924063	5.79562230	3.64684103		94.00000000	0.36531915	2.11725181	2.031208
95	0.63935393	4.73644110	3.02826223		95.00000000	0.36147368	1.71209881	2.052601
96	0.64911604	3.42705560	2.22455676		96.00000000	0.35770833	1.22588635	2.073960
97	0.65927100	1.79721860	1.18485410		97.00000000	0.35402062	0.63625244	2.095326
98	0.66895491	-0.10260654	-0.06863915		98.00000000	0.35040816	-0.03595417	2.116828
99	0.67910177	-2.40968280	-1.63641985		99.00000000	0.34686869	-0.83584351	2.138209
100	0.68882513	-5.02054210	-3.45827556		100.00000000	0.34340000	-1.72405416	2.159607
101	0.69902998	-8.13458250	-5.68631704		101.00000000	0.34000000	-2.76575805	2.180975
08:30 04/04/2018
Test Lot:	JK-PERC
Recipe:	Recipe_YJX-LID
Cell Name:	3-6-9h
Test Order:	3
Test Condition:	Light
1	-0.29994282	9.07946590	-2.72332061		1.00000000	34.34000000	311.78885901	0.000000
2	-0.29012245	9.08472350	-2.63568224		2.00000000	17.17000000	155.98470250	0.061790
3	-0.27999023	9.08792880	-2.54453127		3.00000000	11.44666667	104.02649166	0.083218
4	-0.27014902	9.09753040	-2.45768892		4.00000000	8.58500000	78.10229848	0.104715
5	-0.26001981	9.10009570	-2.36620515		5.00000000	6.86800000	62.49945727	0.126112
6	-0.24983700	9.09117700	-2.27131239		6.00000000	5.72333333	52.03183636	0.147526
7	-0.24003524	9.09111020	-2.18218682		7.00000000	4.90571429	44.59838918	0.168912
8	-0.22989783	9.09374330	-2.09063185		8.00000000	4.29250000	39.03489312	0.190394
9	-0.22006629	9.09010510	-2.00042571		9.00000000	3.81555556	34.68380101	0.211772
10	-0.20988572	9.10102840	-1.91017590		10.00000000	3.43400000	31.25293153	0.233115
11	-0.20009735	9.09259510	-1.81940418		11.00000000	3.12181818	28.38542870	0.254497
12	-0.18993835	9.09664250	-1.72780127		12.00000000	2.86166667	26.03155862	0.275982
13	-0.18012916	9.08299920	-1.63611302		13.00000000	2.64153846	23.99309173	0.297352
14	-0.17000440	9.10756590	-1.54832628		14.00000000	2.45285714	22.33955807	0.318714
15	-0.16016692	9.09540080	-1.45678233		15.00000000	2.28933333	20.82240423	0.340092
16	-0.15003024	9.09644030	-1.36474112		16.00000000	2.14625000	19.52323499	0.361583
17	-0.13985562	9.09364320	-1.27179711		17.00000000	2.02000000	18.36915926	0.382967
18	-0.13005684	9.10827350	-1.18459327		18.00000000	1.90777778	17.37656178	0.404334
19	-0.11994547	9.08100320	-1.08922520		19.00000000	1.80736842	16.41271842	0.425692
20	-0.11008938	9.10497380	-1.00236092		20.00000000	1.71700000	15.63324001	0.447179
21	-0.09992667	9.08570100	-0.90790380		21.00000000	1.63523810	14.85728440	0.468563
22	-0.09012342	9.10232350	-0.82033254		22.00000000	1.56090909	14.20789950	0.489953
23	-0.07996442	9.09447100	-0.72723412		23.00000000	1.49304348	13.57844061	0.511295
24	-0.07012992	9.08961770	-0.63745413		24.00000000	1.43083333	13.00572799	0.532770
25	-0.05999176	9.10170460	-0.54602730		25.00000000	1.37360000	12.50210144	0.554155
26	-0.04986700	9.08059600	-0.45282208		26.00000000	1.32076923	11.99337179	0.575546
27	-0.04004738	9.10456180	-0.36461386		27.00000000	1.27185185	11.57965379	0.597020
28	-0.02988764	9.09230140	-0.27174742		28.00000000	1.22642857	11.15105822	0.618408
29	-0.02008514	9.07726960	-0.18231820		29.00000000	1.18413793	10.74873924	0.639768
30	-0.00992837	9.09556100	-0.09030412		30.00000000	1.14466667	10.41138549	0.661147
31	-0.00066620	9.08135700	-0.00604996		31.00000000	1.10774194	10.05979998	0.682753
32	0.00949483	9.09073640	0.08631496		32.00000000	1.07312500	9.75549650	0.704133
33	0.01930821	9.08819290	0.17547676		33.00000000	1.04060606	9.45722861	0.725485
34	0.02945352	9.09683800	0.26793393		34.00000000	1.01000000	9.18780638	0.746868
35	0.03924459	9.08223340	0.35642848		35.00000000	0.98114286	8.91096843	0.768348
36	0.04942636	9.09329320	0.44944840		36.00000000	0.95388889	8.67399135	0.789737
37	0.05924347	9.09216980	0.53865166		37.00000000	0.92810811	8.43851651	0.811076
38	0.06935231	9.09552760	0.63079589		38.00000000	0.90368421	8.21948468	0.832449
39	0.07954079	9.08577630	0.72268982		39.00000000	0.88051282	8.00014252	0.853928
40	0.08935344	9.09246830	0.81244328		40.00000000	0.85850000	7.80588404	0.875298
41	0.09950842	9.08944420	0.90447623		41.00000000	0.83756098	7.61296375	0.896654
42	0.10934413	9.09126660	0.99407664		42.00000000	0.81761905	7.43319274	0.918038
43	0.11949986	9.09061910	1.08632771		43.00000000	0.79860465	7.25981070	0.939529
44	0.12930655	9.09159090	1.17560225		44.00000000	0.78045455	7.09557344	0.960910
45	0.13945037	9.08895020	1.26745747		45.00000000	0.76311111	6.93587889	0.982270
46	0.14928535	9.08778190	1.35667270		46.00000000	0.74652174	6.78422675	1.003650
47	0.15942247	9.09624670	1.45014612		47.00000000	0.73063830	6.64606621	1.025176
48	0.16956331	9.08171560	1.53992576		48.00000000	0.71541667	6.49721070	1.046563
49	0.17939158	9.09484670	1.63153892		49.00000000	0.70081633	6.37381705	1.067928
50	0.18951829	9.08327960	1.72144762		50.00000000	0.68680000	6.23839643	1.089295
51	0.19931084	9.09660050	1.81305109		51.00000000	0.67333333	6.12504434	1.110781
52	0.20945838	9.07923220	1.90172127		52.00000000	0.66038462	5.99578526	1.132149
53	0.21926580	9.09774590	1.99482453		53.00000000	0.64792453	5.89465272	1.153539
54	0.22942452	9.08276560	2.08380914		54.00000000	0.63592593	5.77596612	1.174887
55	0.23925205	9.09173580	2.17521643		55.00000000	0.62436364	5.67654922	1.196358
56	0.24938545	9.08905700	2.26667857		56.00000000	0.61321429	5.57353960	1.217750
57	0.25956351	9.07916930	2.35662105		57.00000000	0.60245614	5.46980129	1.239124
58	0.26932332	9.09901430	2.45057674		58.00000000	0.59206897	5.38724398	1.260599
59	0.27949020	9.09054760	2.54071897		59.00000000	0.58203390	5.29100686	1.281984
60	0.28932667	9.08433910	2.62834158		60.00000000	0.57233333	5.19927008	1.303327
61	0.29946601	9.09295080	2.72302970		61.00000000	0.56295082	5.11888411	1.324698
62	0.30928758	9.08297440	2.80925117		62.00000000	0.55387097	5.03079582	1.346193
63	0.31942472	9.09508230	2.90519412		63.00000000	0.54507937	4.95754169	1.367564
64	0.32926193	9.08637330	2.99179681		64.00000000	0.53656250	4.87540717	1.388927
65	0.33937895	9.08743190	3.08408310		65.00000000	0.52830769	4.80096018	1.410293
66	0.34921539	9.08074470	3.17113580		66.00000000	0.52030303	4.72473898	1.431778
67	0.35937113	9.08863160	3.26619181		67.00000000	0.51253731	4.65826282	1.453170
68	0.36953878	9.08839800	3.35851551		68.00000000	0.50500000	4.58964099	1.474531
69	0.37934321	9.07594110	3.44289663		69.00000000	0.49768116	4.51692489	1.495905
70	0.38950118	9.09358310	3.54196135		70.00000000	0.49057143	4.46105205	1.517389
71	0.39932275	9.08069420	3.62612778		71.00000000	0.48366197	4.39198646	1.538768
72	0.40946883	9.09423920	3.72380748		72.00000000	0.47694444	4.33744686	1.560112
73	0.41929114	9.07452960	3.80486986		73.00000000	0.47041096	4.26875817	1.581510
74	0.42944911	9.08540250	3.90171802		74.00000000	0.46405405	4.21611786	1.602985
75	0.43927738	9.07228280	3.98524862		75.00000000	0.45786667	4.15389588	1.624357
76	0.44943607	9.08145240	4.08153228		76.00000000	0.45184211	4.10338257	1.645733
77	0.45957470	9.06230260	4.16480500		77.00000000	0.44597403	4.04155158	1.667110
78	0.46942529	9.05838390	4.25223449		78.00000000	0.44025641	3.98801158	1.688582
79	0.47954828	9.05720420	4.34336670		79.00000000	0.43468354	3.93701762	1.709957
80	0.48936462	9.04026790	4.42398727		80.00000000	0.42925000	3.88053500	1.731321
81	0.49951589	9.03605560	4.51365336		81.00000000	0.42395062	3.83084135	1.752693
82	0.50932187	9.00838850	4.58816928		82.00000000	0.41878049	3.77253733	1.774175
83	0.51944035	9.00016880	4.67505083		83.00000000	0.41373494	3.72368430	1.795552
84	0.52924705	8.94745640	4.73541490		84.00000000	0.40880952	3.65780539	1.816944
85	0.53938568	8.89969830	4.80036982		85.00000000	0.40400000	3.59547811	1.838293
86	0.54953843	8.83292680	4.85403273		86.00000000	0.39930233	3.52700821	1.859770
87	0.55934733	8.72911830	4.88260901		87.00000000	0.39471264	3.44549336	1.881175
88	0.56948000	8.58388230	4.88834929		88.00000000	0.39022727	3.34966498	1.902558
89	0.57927924	8.39962290	4.86572717		89.00000000	0.38584270	3.24093315	1.924034
90	0.58940595	8.12154290	4.78688571		90.00000000	0.38155556	3.09881981	1.945419
91	0.59921336	7.75839190	4.64893208		91.00000000	0.37736264	2.92772723	1.966781
92	0.60931778	7.29457710	4.44471552		92.00000000	0.37326087	2.72278019	1.988254
93	0.61914158	6.63491920	4.10795436		93.00000000	0.36924731	2.44992608	2.009760
94	0.62923181	5.80855610	3.65492827		94.00000000	0.36531915	2.12197677	2.031141
95	0.63935775	4.73118830	3.02492191		95.00000000	0.36147368	1.71020007	2.052494
96	0.64915478	3.43503280	2.22986796		96.00000000	0.35770833	1.22873986	2.073885
97	0.65925020	1.79078720	1.18057682		97.00000000	0.35402062	0.63397559	2.095368
98	0.66896909	-0.11597964	-0.07758679		98.00000000	0.35040816	-0.04064021	2.116754
99	0.67907196	-2.44572880	-1.66082585		99.00000000	0.34686869	-0.84834674	2.138157
100	0.68881840	-5.08924720	-3.50556711		100.00000000	0.34340000	-1.74764749	2.159550
101	0.69902396	-8.24040410	-5.76023991		101.00000000	0.34000000	-2.80173739	2.181043
08:30 04/04/2018
Test Lot:	JK-PERC
Recipe:	Recipe_YJX-LID
Cell Name:	3-6-9h
Test Order:	4
Test Condition:	Light
1	-0.29995960	9.09629440	-2.72852083		1.00000000	34.34000000	312.36674970	0.000000
2	-0.29015097	9.08709720	-2.63663007		2.00000000	17.17000000	156.02545892	0.061785
3	-0.27999032	9.10141660	-2.54830855		3.00000000	11.44666667	104.18088201	0.083207
4	-0.27016905	9.08327390	-2.45401948		4.00000000	8.58500000	77.97990643	0.104705
5	-0.26005679	9.10353950	-2.36743726		5.00000000	6.86800000	62.52310929	0.126098
6	-0.24985595	9.09066200	-2.27135599		6.00000000	5.72333333	52.02888885	0.147439
7	-0.24008305	9.09217450	-2.18287699		7.00000000	4.90571429	44.60361033	0.168822
8	-0.22992836	9.08571530	-2.08906362		8.00000000	4.29250000	39.00043293	0.190358
9	-0.22011602	9.09820750	-2.00266122		9.00000000	3.81555556	34.71471617	0.211732
10	-0.20995165	9.09313390	-1.90911847		10.00000000	3.43400000	31.22582181	0.233091
11	-0.20013635	9.09067730	-1.81937497		11.00000000	3.12181818	28.37944168	0.254463
12	-0.18996602	9.09973620	-1.72864067		12.00000000	2.86166667	26.04041176	0.275943
13	-0.18018793	9.09013840	-1.63793322		13.00000000	2.64153846	24.01195020	0.297312
14	-0.17003769	9.07830430	-1.54365389		14.00000000	2.45285714	22.26778355	0.318669
15	-0.16021642	9.09746270	-1.45756290		15.00000000	2.28933333	20.82712461	0.340039
16	-0.15009744	9.08115480	-1.36305809		16.00000000	2.14625000	19.49042849	0.361517
17	-0.13995689	9.09226800	-1.27252555		17.00000000	2.02000000	18.36638136	0.382897
18	-0.13012670	9.09588720	-1.18361778		18.00000000	1.90777778	17.35293147	0.404291
19	-0.11997275	9.09449860	-1.09109201		19.00000000	1.80736842	16.43710957	0.425633
20	-0.11017530	9.08502770	-1.00094565		20.00000000	1.71700000	15.59899256	0.447112
21	-0.09996999	9.09634300	-0.90936133		21.00000000	1.63523810	14.87468660	0.468492
22	-0.09013161	9.09008120	-0.81930366		22.00000000	1.56090909	14.18879038	0.489874
23	-0.08002082	9.09773830	-0.72800851		23.00000000	1.49304348	13.58331884	0.511356
24	-0.07018393	9.08975410	-0.63795462		24.00000000	1.43083333	13.00592316	0.532739
25	-0.06002477	9.09103780	-0.54568743		25.00000000	1.37360000	12.48744952	0.554088
26	-0.04986858	9.08098790	-0.45285601		26.00000000	1.32076923	11.99388940	0.575505
27	-0.04006220	9.10731120	-0.36485896		27.00000000	1.27185185	11.58315062	0.596992
28	-0.02990751	9.08269790	-0.27164086		28.00000000	1.22642857	11.13928021	0.618361
29	-0.02006987	9.08623120	-0.18235945		29.00000000	1.18413793	10.75935101	0.639727
30	-0.00997322	9.08585740	-0.09061529		30.00000000	1.14466667	10.40027810	0.661107
31	-0.00065210	9.10511300	-0.00593745		31.00000000	1.10774194	10.08611550	0.682712
32	0.00949718	9.08463380	0.08627837		32.00000000	1.07312500	9.74894765	0.704108
33	0.01929732	9.07933710	0.17520691		33.00000000	1.04060606	9.44801321	0.725462
34	0.02944503	9.08947560	0.26763992		34.00000000	1.01000000	9.18037036	0.746828
35	0.03927272	9.09630490	0.35723662		35.00000000	0.98114286	8.92477458	0.768313
36	0.04939140	9.09326740	0.44912921		36.00000000	0.95388889	8.67396674	0.789697
37	0.05924141	9.08604430	0.53827008		37.00000000	0.92810811	8.43283139	0.811046
38	0.06937126	9.08542820	0.63026761		38.00000000	0.90368421	8.21035801	0.832418
39	0.07948250	9.10094260	0.72336563		39.00000000	0.88051282	8.01349664	0.853898
40	0.08932433	9.09103300	0.81205039		40.00000000	0.85850000	7.80465183	0.875274
41	0.09948468	9.08589740	0.90390761		41.00000000	0.83756098	7.60999309	0.896634
42	0.10928706	9.08564190	0.99294309		42.00000000	0.81761905	7.42859388	0.918001
43	0.11945784	9.09794710	1.08682111		43.00000000	0.79860465	7.26566287	0.939469
44	0.12927733	9.07984920	1.17381866		44.00000000	0.78045455	7.08640958	0.960841
45	0.13941017	9.08621980	1.26671145		45.00000000	0.76311111	6.93379529	0.982258
46	0.14924678	9.09146980	1.35687259		46.00000000	0.74652174	6.78697985	1.003644
47	0.15937811	9.08363910	1.44773323		47.00000000	0.73063830	6.63685461	1.025142
48	0.16953327	9.09078600	1.54119068		48.00000000	0.71541667	6.50369982	1.046515
49	0.17934978	9.09215740	1.63067643		49.00000000	0.70081633	6.37193235	1.067907
50	0.18949005	9.08617970	1.72174065		50.00000000	0.68680000	6.24038822	1.089270
51	0.19928871	9.09152030	1.81183735		51.00000000	0.67333333	6.12162367	1.110747
52	0.20943418	9.08682060	1.90309082		52.00000000	0.66038462	6.00079653	1.132142
53	0.21924104	9.09480760	1.99395508		53.00000000	0.64792453	5.89274892	1.153528
54	0.22940511	9.08550170	2.08426052		54.00000000	0.63592593	5.77770608	1.175005
55	0.23923130	9.08812050	2.17416288		55.00000000	0.62436364	5.67429196	1.196390
56	0.24939762	9.08858970	2.26667264		56.00000000	0.61321429	5.57325304	1.217733
57	0.25954756	9.09102440	2.35955320		57.00000000	0.60245614	5.47694347	1.239103
58	0.26938120	9.08751110	2.44800465		58.00000000	0.59206897	5.38043330	1.260584
59	0.27950361	9.08928680	2.54048847		59.00000000	0.58203390	5.29027303	1.281983
60	0.28931493	9.09200760	2.63045354		60.00000000	0.57233333	5.20365902	1.303342
61	0.29946038	9.08853440	2.72165597		61.00000000	0.56295082	5.11639789	1.324709
62	0.30927914	9.08537200	2.80991604		62.00000000	0.55387097	5.03212378	1.346183
63	0.31944323	9.09194090	2.90435897		63.00000000	0.54507937	4.95582937	1.367563
64	0.32924932	9.07927230	2.98934423		64.00000000	0.53656250	4.87159704	1.388926
65	0.33941713	9.08525850	3.08369237		65.00000000	0.52830769	4.79981195	1.410297
66	0.34922770	9.07798670	3.17028442		66.00000000	0.52030303	4.72330399	1.431786
67	0.35936499	9.08009820	3.26306940		67.00000000	0.51253731	4.65388914	1.453167
68	0.36955288	9.09258650	3.36019153		68.00000000	0.50500000	4.59175618	1.474510
69	0.37935302	9.08716390	3.44724307		69.00000000	0.49768116	4.52251027	1.495893
70	0.38952306	9.08692550	3.53956703		70.00000000	0.49057143	4.45778602	1.517378
71	0.39931428	9.08152480	3.62638254		71.00000000	0.48366197	4.39238819	1.538757
72	0.40946496	9.08517460	3.72006065		72.00000000	0.47694444	4.33312355	1.560100
73	0.41926587	9.07262130	3.80384046		73.00000000	0.47041096	4.26786049	1.581476
74	0.42941132	9.07674220	3.89765585		74.00000000	0.46405405	4.21209902	1.602946
75	0.43923008	9.08429720	3.99009659		75.00000000	0.45786667	4.15939688	1.624321
76	0.44939789	9.06667710	4.07454556		76.00000000	0.45184211	4.09670647	1.645692
77	0.45954561	9.07806020	4.17178271		77.00000000	0.44597403	4.04857906	1.667058
78	0.46940902	9.05686860	4.25137581		78.00000000	0.44025641	3.98734446	1.688543
79	0.47952992	9.05287650	4.34112514		79.00000000	0.43468354	3.93513644	1.709907
80	0.48934793	9.04038140	4.42389192		80.00000000	0.42925000	3.88058372	1.731305
81	0.49949268	9.03130630	4.51107139		81.00000000	0.42395062	3.82882788	1.752651
82	0.50929725	9.01621250	4.59193223		82.00000000	0.41878049	3.77581387	1.774127
83	0.51946211	8.98990920	4.66991720		83.00000000	0.41373494	3.71943954	1.795518
84	0.52924585	8.95012570	4.73681688		84.00000000	0.40880952	3.65889663	1.816902
85	0.53936529	8.91260430	4.80714940		85.00000000	0.40400000	3.60069214	1.838387
86	0.54951674	8.82225130	4.84797477		86.00000000	0.39930233	3.52274546	1.859764
87	0.55935931	8.73348430	4.88515575		87.00000000	0.39471264	3.44721668	1.881134
88	0.56946307	8.58091930	4.88651665		88.00000000	0.39022727	3.34850874	1.902509
89	0.57928336	8.39223670	4.86148307		89.00000000	0.38584270	3.23808324	1.923999
90	0.58941764	8.12820050	4.79090476		90.00000000	0.38155556	3.10136006	1.945386
91	0.59923267	7.77044680	4.65630558		91.00000000	0.37736264	2.93227630	1.966734
92	0.60932606	7.28169580	4.43692701		92.00000000	0.37326087	2.71797211	1.988217
93	0.61913145	6.65253070	4.11879098		93.00000000	0.36924731	2.45642908	2.009726
94	0.62922478	5.80112550	3.65021192		94.00000000	0.36531915	2.11926223	2.031125
95	0.63937998	4.73534200	3.02768287		95.00000000	0.36147368	1.71170152	2.052471
96	0.64916223	3.43817420	2.23193283		96.00000000	0.35770833	1.22986356	2.073844
97	0.65927792	1.78446920	1.17646114		97.00000000	0.35402062	0.63173889	2.095322
98	0.66899252	-0.13103531	-0.08766164		98.00000000	0.35040816	-0.04591584	2.116697
99	0.67906952	-2.47090480	-1.67791614		99.00000000	0.34686869	-0.85707950	2.138075
100	0.68879968	-5.11611130	-3.52397583		100.00000000	0.34340000	-1.75687262	2.159453
101	0.69903523	-8.29274560	-5.79692133		101.00000000	0.34000000	-2.81953350	2.180958
