# Supplementary material for: Study on the Electrical Injection Regeneration of Industrialized B-Doped Czochralski Silicon PERC Solar Cells
Source: Hindawi journal article supplement (doi:10.1155/2019/5357370), 2019-06-20
Supplement: f1 [file 5357370.f1.zip › section3.3/IVRawData_3-6-10h.csv]

09:31 04/04/2018
Test Lot:	JK-PERC
Recipe:	Recipe_YJX-LID
Cell Name:	3-6-10h
Test Order:	2
Test Condition:	Light
1	-0.30002436	9.08341790	-2.72524664		1.00000000	34.34000000	311.92457069	0.000000
2	-0.29018825	9.10236840	-2.64140036		2.00000000	17.17000000	156.28766543	0.061820
3	-0.28006932	9.07538890	-2.54173800		3.00000000	11.44666667	103.88295161	0.083262
4	-0.27025631	9.10948470	-2.46189572		4.00000000	8.58500000	78.20492615	0.104805
5	-0.26008007	9.09895040	-2.36645566		5.00000000	6.86800000	62.49159135	0.126201
6	-0.24992467	9.09631250	-2.27339290		6.00000000	5.72333333	52.06122854	0.147569
7	-0.24010421	9.09387590	-2.18347789		7.00000000	4.90571429	44.61195692	0.168922
8	-0.22995031	9.09925750	-2.09237708		8.00000000	4.29250000	39.05856282	0.190418
9	-0.22012164	9.08560940	-1.99993924		9.00000000	3.81555556	34.66664742	0.211796
10	-0.20996924	9.09608360	-1.90989776		10.00000000	3.43400000	31.23595108	0.233177
11	-0.20014131	9.10960480	-1.82320824		11.00000000	3.12181818	28.43852989	0.254532
12	-0.19003057	9.09089180	-1.72754735		12.00000000	2.86166667	26.01510203	0.276005
13	-0.18024583	9.08453940	-1.63745034		13.00000000	2.64153846	23.99716023	0.297381
14	-0.17010979	9.09772400	-1.54761192		14.00000000	2.45285714	22.31541730	0.318773
15	-0.16029155	9.09344200	-1.45760191		15.00000000	2.28933333	20.81791989	0.340260
16	-0.15014955	9.09293270	-1.36529975		16.00000000	2.14625000	19.51570681	0.361638
17	-0.14001426	9.10943790	-1.27545121		17.00000000	2.02000000	18.40106456	0.382976
18	-0.13017741	9.07797050	-1.18174669		18.00000000	1.90777778	17.31875039	0.404354
19	-0.12001681	9.09800620	-1.09191368		19.00000000	1.80736842	16.44344910	0.425845
20	-0.11018591	9.09074310	-1.00167180		20.00000000	1.71700000	15.60880590	0.447216
21	-0.10004839	9.08808610	-0.90924838		21.00000000	1.63523810	14.86118460	0.468565
22	-0.09023610	9.09611510	-0.82079793		22.00000000	1.56090909	14.19820875	0.489940
23	-0.08007997	9.08983520	-0.72791368		23.00000000	1.49304348	13.57151916	0.511420
24	-0.07025354	9.09507080	-0.63896088		24.00000000	1.43083333	13.01353047	0.532794
25	-0.06012420	9.10060310	-0.54716644		25.00000000	1.37360000	12.50058842	0.554142
26	-0.04994424	9.08447930	-0.45371745		26.00000000	1.32076923	11.99850074	0.575522
27	-0.04015056	9.09738160	-0.36526500		27.00000000	1.27185185	11.57052163	0.597001
28	-0.02999666	9.09664440	-0.27286896		28.00000000	1.22642857	11.15638460	0.618396
29	-0.02013525	9.09467510	-0.18312359		29.00000000	1.18413793	10.76934976	0.639740
30	-0.00999996	9.08710480	-0.09087067		30.00000000	1.14466667	10.40170596	0.661151
31	-0.00070493	9.09949300	-0.00641450		31.00000000	1.10774194	10.07988999	0.682754
32	0.00944430	9.09751030	0.08591963		32.00000000	1.07312500	9.76276574	0.704137
33	0.01925631	9.07799910	0.17480876		33.00000000	1.04060606	9.44662088	0.725515
34	0.02939132	9.09413430	0.26728857		34.00000000	1.01000000	9.18507564	0.746893
35	0.03923756	9.09277730	0.35677839		35.00000000	0.98114286	8.92131350	0.768364
36	0.04936289	9.09323500	0.44886836		36.00000000	0.95388889	8.67393583	0.789747
37	0.05918904	9.08357140	0.53764783		37.00000000	0.92810811	8.43053627	0.811107
38	0.06933446	9.09506420	0.63060138		38.00000000	0.90368421	8.21906591	0.832472
39	0.07948287	9.08826160	0.72236110		39.00000000	0.88051282	8.00233085	0.853949
40	0.08930530	9.09527780	0.81225649		40.00000000	0.85850000	7.80829599	0.875321
41	0.09945742	9.09103200	0.90417059		41.00000000	0.83756098	7.61429363	0.896707
42	0.10926273	9.10072610	0.99437018		42.00000000	0.81761905	7.44092701	0.918053
43	0.11942750	9.09128190	1.08574907		43.00000000	0.79860465	7.26034001	0.939520
44	0.12922537	9.08659930	1.17421916		44.00000000	0.78045455	7.09167773	0.960884
45	0.13937823	9.08981320	1.26692207		45.00000000	0.76311111	6.93653745	0.982263
46	0.14919174	9.08805080	1.35586211		46.00000000	0.74652174	6.78442749	1.003741
47	0.15933865	9.08224300	1.44715234		47.00000000	0.73063830	6.63583457	1.025125
48	0.16948631	9.10928150	1.54389851		48.00000000	0.71541667	6.51693181	1.046467
49	0.17930874	9.08009050	1.62813959		49.00000000	0.70081633	6.36347567	1.067846
50	0.18945417	9.09390260	1.72287777		50.00000000	0.68680000	6.24569231	1.089328
51	0.19925277	9.09723190	1.81264866		51.00000000	0.67333333	6.12546948	1.110704
52	0.20939671	9.08873370	1.90315093		52.00000000	0.66038462	6.00205991	1.132042
53	0.21921542	9.09508040	1.99378187		53.00000000	0.64792453	5.89292568	1.153422
54	0.22935936	9.08474640	2.08367162		54.00000000	0.63592593	5.77722577	1.174900
55	0.23915127	9.09281730	2.17455881		55.00000000	0.62436364	5.67722447	1.196274
56	0.24930264	9.09143730	2.26651932		56.00000000	0.61321429	5.57499923	1.217635
57	0.25947562	9.10754200	2.36318511		57.00000000	0.60245614	5.48689460	1.239009
58	0.26925486	9.07598690	2.44375358		58.00000000	0.59206897	5.37361017	1.260523
59	0.27945611	9.08985520	2.54021557		59.00000000	0.58203390	5.29060386	1.281895
60	0.28924876	9.09048460	2.62941140		60.00000000	0.57233333	5.20278735	1.303230
61	0.29939717	9.08128170	2.71891004		61.00000000	0.56295082	5.11231498	1.324618
62	0.30923226	9.08636190	2.80979623		62.00000000	0.55387097	5.03267206	1.346081
63	0.31939256	9.08016010	2.90013558		63.00000000	0.54507937	4.94940790	1.367451
64	0.32920754	9.09118840	2.99288777		64.00000000	0.53656250	4.87799078	1.388809
65	0.33935073	9.08174420	3.08189652		65.00000000	0.52830769	4.79795532	1.410178
66	0.34918210	9.08318610	3.17168600		66.00000000	0.52030303	4.72600925	1.431661
67	0.35933125	9.08762740	3.26546851		67.00000000	0.51253731	4.65774813	1.453043
68	0.36949751	9.09007550	3.35876026		68.00000000	0.50500000	4.59048813	1.474411
69	0.37931547	9.07742500	3.44320773		69.00000000	0.49768116	4.51766340	1.495768
70	0.38947952	9.09699440	3.54309301		70.00000000	0.49057143	4.46272554	1.517244
71	0.39929375	9.08046440	3.62577268		71.00000000	0.48366197	4.39187532	1.538613
72	0.40941983	9.06938930	3.71318783		72.00000000	0.47694444	4.32559484	1.559985
73	0.41924447	9.07973000	3.80662659		73.00000000	0.47041096	4.27120450	1.581344
74	0.42938769	9.08222960	3.89979759		74.00000000	0.46405405	4.21464547	1.602823
75	0.43918926	9.08223340	3.98881937		75.00000000	0.45786667	4.15845193	1.624215
76	0.44937265	9.06855680	4.07516140		76.00000000	0.45184211	4.09755580	1.645593
77	0.45952031	9.05890180	4.16274936		77.00000000	0.44597403	4.04003491	1.667068
78	0.46933007	9.06614690	4.25501536		78.00000000	0.44025641	3.99142929	1.688449
79	0.47949633	9.05730820	4.34294604		79.00000000	0.43468354	3.93706283	1.709804
80	0.48931059	9.05217460	4.42932489		80.00000000	0.42925000	3.88564595	1.731178
81	0.49940243	9.02096270	4.50509069		81.00000000	0.42395062	3.82444271	1.752660
82	0.50926429	9.02300170	4.59509255		82.00000000	0.41878049	3.77865705	1.774033
83	0.51942682	8.97285270	4.66074034		83.00000000	0.41373494	3.71238267	1.795369
84	0.52918524	8.95078660	4.73662416		84.00000000	0.40880952	3.65916681	1.816754
85	0.53929424	8.88665870	4.79252385		85.00000000	0.40400000	3.59021011	1.838235
86	0.54948056	8.81982230	4.84632090		86.00000000	0.39930233	3.52177556	1.859607
87	0.55924422	8.70888610	4.87039421		87.00000000	0.39471264	3.43750746	1.880960
88	0.56941789	8.56987950	4.87984270		88.00000000	0.39022727	3.34420070	1.902333
89	0.57920241	8.36115930	4.84280362		89.00000000	0.38584270	3.22609225	1.923803
90	0.58933365	8.09039210	4.76794031		90.00000000	0.38155556	3.08693405	1.945175
91	0.59913826	7.70168780	4.61437583		91.00000000	0.37736264	2.90632922	1.966526
92	0.60924274	7.21023750	4.39278485		92.00000000	0.37326087	2.69129952	1.988003
93	0.61905253	6.55884790	4.06027139		93.00000000	0.36924731	2.42183696	2.009505
94	0.62918752	5.71341420	3.59480891		94.00000000	0.36531915	2.08721961	2.030874
95	0.63930613	4.62624220	2.95758500		95.00000000	0.36147368	1.67226481	2.052231
96	0.64910251	3.34618090	2.17201442		96.00000000	0.35770833	1.19695679	2.073646
97	0.65922040	1.73209440	1.14183196		97.00000000	0.35402062	0.61319713	2.095140
98	0.66892749	-0.11385329	-0.07615960		98.00000000	0.35040816	-0.03989512	2.116543
99	0.67900592	-2.33724760	-1.58700496		99.00000000	0.34686869	-0.81071801	2.137917
100	0.68875617	-4.84107110	-3.33431759		100.00000000	0.34340000	-1.66242382	2.159270
101	0.69894850	-7.79287100	-5.44681550		101.00000000	0.34000000	-2.64957614	2.180759
09:31 04/04/2018
Test Lot:	JK-PERC
Recipe:	Recipe_YJX-LID
Cell Name:	3-6-10h
Test Order:	3
Test Condition:	Light
1	-0.30003330	9.11102200	-2.73361000		1.00000000	34.34000000	312.87249548	0.000000
2	-0.29016444	9.08613490	-2.63647325		2.00000000	17.17000000	156.00893623	0.021592
3	-0.28002468	9.09684090	-2.54733996		3.00000000	11.44666667	104.12850550	0.042983
4	-0.27021685	9.09848020	-2.45856266		4.00000000	8.58500000	78.11045252	0.064326
5	-0.26007113	9.09970860	-2.36657150		5.00000000	6.86800000	62.49679866	0.085715
6	-0.24995743	9.08810620	-2.27163967		6.00000000	5.72333333	52.01426115	0.107202
7	-0.24012803	9.09980680	-2.18511868		7.00000000	4.90571429	44.64105222	0.128568
8	-0.22995923	9.08998390	-2.09032570		8.00000000	4.29250000	39.01875589	0.149924
9	-0.22013505	9.09828950	-2.00285241		9.00000000	3.81555556	34.71502905	0.171297
10	-0.20997667	9.09063820	-1.90882194		10.00000000	3.43400000	31.21725158	0.192802
11	-0.20014429	9.09692100	-1.82069679		11.00000000	3.12181818	28.39893338	0.214190
12	-0.19002612	9.09558490	-1.72839871		12.00000000	2.86166667	26.02853212	0.235530
13	-0.18023020	9.08827500	-1.63798162		13.00000000	2.64153846	24.00702796	0.256906
14	-0.17009936	9.09815310	-1.54759002		14.00000000	2.45285714	22.31646982	0.278390
15	-0.16027294	9.08947660	-1.45679714		15.00000000	2.28933333	20.80884176	0.299754
16	-0.15012127	9.10303970	-1.36655988		16.00000000	2.14625000	19.53739896	0.321109
17	-0.13997482	9.09040450	-1.27242773		17.00000000	2.02000000	18.36261709	0.342484
18	-0.13019677	9.10211850	-1.18506643		18.00000000	1.90777778	17.36481941	0.363955
19	-0.12002872	9.09394930	-1.09153509		19.00000000	1.80736842	16.43611679	0.385336
20	-0.11023653	9.08687780	-1.00170588		20.00000000	1.71700000	15.60216918	0.406679
21	-0.09998539	9.09174440	-0.90904162		21.00000000	1.63523810	14.86716680	0.428051
22	-0.09017925	9.08134840	-0.81894919		22.00000000	1.56090909	14.17515928	0.489757
23	-0.08002331	9.08851810	-0.72729331		23.00000000	1.49304348	13.56955268	0.511167
24	-0.07017326	9.09782890	-0.63842428		24.00000000	1.43083333	13.01747685	0.532643
25	-0.06003741	9.08576300	-0.54548566		25.00000000	1.37360000	12.48020406	0.554030
26	-0.04987254	9.09421440	-0.45355157		26.00000000	1.32076923	12.01135856	0.575402
27	-0.04008872	9.09518050	-0.36461415		27.00000000	1.27185185	11.56772216	0.596763
28	-0.02991939	9.08010200	-0.27167108		28.00000000	1.22642857	11.13609652	0.618248
29	-0.02010952	9.08919430	-0.18277933		29.00000000	1.18413793	10.76285973	0.639612
30	-0.00997516	9.10389710	-0.09081286		30.00000000	1.14466667	10.42092755	0.660993
31	-0.00067882	9.08546730	-0.00616744		31.00000000	1.10774194	10.06435313	0.682461
32	0.00949477	9.09744360	0.08637812		32.00000000	1.07312500	9.76269416	0.703947
33	0.01930436	9.08665080	0.17541194		33.00000000	1.04060606	9.45562389	0.725325
34	0.02945554	9.09526060	0.26790580		34.00000000	1.01000000	9.18621321	0.746709
35	0.03928224	9.08116820	0.35672867		35.00000000	0.98114286	8.90992331	0.768191
36	0.04942748	9.10651400	0.45011200		36.00000000	0.95388889	8.68660252	0.789558
37	0.05927130	9.08464620	0.53845874		37.00000000	0.92810811	8.43153380	0.810909
38	0.06938452	9.10474010	0.63172805		38.00000000	0.90368421	8.22780987	0.832282
39	0.07955506	9.07445910	0.72191911		39.00000000	0.88051282	7.99017758	0.853771
40	0.08937208	9.10362340	0.81360980		40.00000000	0.85850000	7.81546069	0.875152
41	0.09951881	9.08350940	0.90398001		41.00000000	0.83756098	7.60799300	0.896498
42	0.10931053	9.09372520	0.99403992		42.00000000	0.81761905	7.43520294	0.917887
43	0.11947065	9.08359810	1.08522337		43.00000000	0.79860465	7.25420369	0.939366
44	0.12930480	9.09153370	1.17557895		44.00000000	0.78045455	7.09552880	0.960742
45	0.13944705	9.09123040	1.26774526		45.00000000	0.76311111	6.93761893	0.982111
46	0.14926259	9.09829140	1.35803454		46.00000000	0.74652174	6.79207232	1.003483
47	0.15941302	9.09131530	1.44927403		47.00000000	0.73063830	6.64246314	1.024954
48	0.16956198	9.09460450	1.54209915		48.00000000	0.71541667	6.50643164	1.046341
49	0.17938943	9.09163570	1.63094335		49.00000000	0.70081633	6.37156673	1.067680
50	0.18951829	9.08896730	1.72252554		50.00000000	0.68680000	6.24230274	1.089057
51	0.19928992	9.09575460	1.81269221		51.00000000	0.67333333	6.12447476	1.110548
52	0.20942399	9.08795070	1.90323490		52.00000000	0.66038462	6.00154283	1.131922
53	0.21927674	9.10876370	1.99734001		53.00000000	0.64792453	5.90179142	1.153275
54	0.22942121	9.08106990	2.08339004		54.00000000	0.63592593	5.77488778	1.174662
55	0.23924346	9.10020540	2.17716463		55.00000000	0.62436364	5.68183734	1.196145
56	0.24939539	9.08348270	2.26537871		56.00000000	0.61321429	5.57012136	1.217540
57	0.25954136	9.09297560	2.36000325		57.00000000	0.60245614	5.47811898	1.238901
58	0.26936510	9.08465100	2.44708793		58.00000000	0.59206897	5.37873992	1.260260
59	0.27945971	9.08944130	2.54013263		59.00000000	0.58203390	5.29036295	1.281725
60	0.28933108	9.09828000	2.63241518		60.00000000	0.57233333	5.20724892	1.303097
61	0.29947183	9.08770180	2.72151069		61.00000000	0.56295082	5.11592918	1.324483
62	0.30929333	9.10126400	2.81496025		62.00000000	0.55387097	5.04092590	1.345836
63	0.31943411	9.09652900	2.90574165		63.00000000	0.54507937	4.95833025	1.367321
64	0.32924816	9.08146860	2.99005683		64.00000000	0.53656250	4.87277550	1.388687
65	0.33939934	9.09443470	3.08664513		65.00000000	0.52830769	4.80465981	1.410075
66	0.34922454	9.09042930	3.17460099		66.00000000	0.52030303	4.72977791	1.431553
67	0.35937870	9.08814240	3.26608480		67.00000000	0.51253731	4.65801209	1.452951
68	0.36956039	9.09330270	3.36052449		68.00000000	0.50500000	4.59211786	1.474305
69	0.37937075	9.07926750	3.44440852		69.00000000	0.49768116	4.51858038	1.495683
70	0.38952565	9.09335990	3.54209693		70.00000000	0.49057143	4.46094256	1.517170
71	0.39931142	9.07194900	3.62253284		71.00000000	0.48366197	4.38775674	1.538545
72	0.40950724	9.08862300	3.72185692		72.00000000	0.47694444	4.33476825	1.559878
73	0.41929153	9.07128330	3.80351225		73.00000000	0.47041096	4.26723108	1.581260
74	0.42945164	9.08698460	3.90242044		74.00000000	0.46405405	4.21685204	1.602726
75	0.43926719	9.07150840	3.98481600		75.00000000	0.45786667	4.15354131	1.624094
76	0.44942358	9.07649330	4.07919011		76.00000000	0.45184211	4.10114184	1.645447
77	0.45957327	9.06281660	4.16502826		77.00000000	0.44597403	4.04178081	1.666831
78	0.46944091	9.07157330	4.25856763		78.00000000	0.44025641	3.99381830	1.688313
79	0.47958094	9.06307220	4.34647668		79.00000000	0.43468354	3.93956835	1.709708
80	0.48937565	9.03750420	4.42273449		80.00000000	0.42925000	3.87934868	1.731056
81	0.49950376	9.04139610	4.51621135		81.00000000	0.42395062	3.83310546	1.752434
82	0.50928581	9.01052190	4.58893094		82.00000000	0.41878049	3.77343076	1.773903
83	0.51947492	8.98793790	4.66900832		83.00000000	0.41373494	3.71862395	1.795285
84	0.52925253	8.95636840	4.74018064		84.00000000	0.40880952	3.66144870	1.816650
85	0.53938287	8.90216160	4.80167347		85.00000000	0.40400000	3.59647329	1.838022
86	0.54951173	8.82783890	4.85100103		86.00000000	0.39930233	3.52497660	1.859501
87	0.55935258	8.73111720	4.88377293		87.00000000	0.39471264	3.44628235	1.880887
88	0.56946653	8.58978180	4.89159324		88.00000000	0.39022727	3.35196713	1.902247
89	0.57929254	8.40724090	4.87025194		89.00000000	0.38584270	3.24387250	1.923608
90	0.58943325	8.12286280	4.78788542		90.00000000	0.38155556	3.09932343	1.945084
91	0.59921384	7.77517510	4.65899253		91.00000000	0.37736264	2.93406058	1.966473
92	0.60934269	7.28101590	4.43663381		92.00000000	0.37326087	2.71771833	1.987941
93	0.61914933	6.65035630	4.11756365		93.00000000	0.36924731	2.45562619	2.009321
94	0.62924021	5.79890440	3.64890382		94.00000000	0.36531915	2.11845082	2.030806
95	0.63934153	4.72736840	3.02240295		95.00000000	0.36147368	1.70881927	2.052200
96	0.64916748	3.42694540	2.22466151		96.00000000	0.35770833	1.22584693	2.073607
97	0.65924573	1.77774370	1.17196994		97.00000000	0.35402062	0.62935792	2.095090
98	0.66901070	-0.13891298	-0.09293427		98.00000000	0.35040816	-0.04867624	2.116478
99	0.67906284	-2.47463990	-1.68043600		99.00000000	0.34686869	-0.85837509	2.137821
100	0.68882853	-5.12087680	-3.52740604		100.00000000	0.34340000	-1.75850909	2.159193
101	0.69905865	-8.28529360	-5.79190616		101.00000000	0.34000000	-2.81699982	2.180721
09:31 04/04/2018
Test Lot:	JK-PERC
Recipe:	Recipe_YJX-LID
Cell Name:	3-6-10h
Test Order:	4
Test Condition:	Light
1	-0.30000582	9.09877110	-2.72968428		1.00000000	34.34000000	312.45179957	0.000000
2	-0.29016453	9.09253410	-2.63833088		2.00000000	17.17000000	156.11881050	0.061783
3	-0.28003672	9.09031770	-2.54562275		3.00000000	11.44666667	104.05383661	0.083245
4	-0.27020806	9.08903600	-2.45593078		4.00000000	8.58500000	78.02937406	0.104757
5	-0.26005715	9.08945850	-2.36377867		5.00000000	6.86800000	62.42640098	0.126146
6	-0.24989435	9.09423450	-2.27259782		6.00000000	5.72333333	52.04933546	0.147492
7	-0.24005009	9.09245870	-2.18264553		7.00000000	4.90571429	44.60500454	0.168918
8	-0.22991928	9.09327030	-2.09071816		8.00000000	4.29250000	39.03286276	0.190409
9	-0.22011073	9.10202220	-2.00345275		9.00000000	3.81555556	34.72927137	0.211785
10	-0.20996653	9.08157630	-1.90682706		10.00000000	3.43400000	31.18613301	0.233150
11	-0.20015426	9.09715370	-1.82083407		11.00000000	3.12181818	28.39965982	0.254553
12	-0.19001304	9.08739090	-1.72672277		12.00000000	2.86166667	26.00508363	0.276033
13	-0.18020226	9.09043600	-1.63811711		13.00000000	2.64153846	24.01273633	0.297423
14	-0.17007592	9.09806160	-1.54736120		14.00000000	2.45285714	22.31624538	0.318800
15	-0.16024728	9.08494760	-1.45583814		15.00000000	2.28933333	20.79847337	0.340132
16	-0.15010753	9.09426310	-1.36511737		16.00000000	2.14625000	19.51856218	0.361619
17	-0.13998418	9.09114740	-1.27261681		17.00000000	2.02000000	18.36411775	0.382983
18	-0.13013841	9.08694840	-1.18256102		18.00000000	1.90777778	17.33587823	0.404353
19	-0.11999719	9.08837030	-1.09057890		19.00000000	1.80736842	16.42603348	0.425744
20	-0.11018120	9.09605880	-1.00221467		20.00000000	1.71700000	15.61793296	0.447216
21	-0.09999458	9.09146120	-0.90909682		21.00000000	1.63523810	14.86670370	0.468601
22	-0.09018752	9.09611890	-0.82035641		22.00000000	1.56090909	14.19821468	0.489984
23	-0.08005001	9.10251240	-0.72865625		23.00000000	1.49304348	13.59044677	0.511466
24	-0.07021393	9.08922480	-0.63819018		24.00000000	1.43083333	13.00516582	0.532852
25	-0.06007791	9.08769800	-0.54596993		25.00000000	1.37360000	12.48286197	0.554197
26	-0.04989724	9.09777640	-0.45395395		26.00000000	1.32076923	12.01606314	0.575578
27	-0.04008870	9.09232040	-0.36449929		27.00000000	1.27185185	11.56408454	0.597059
28	-0.02994821	9.08904080	-0.27220054		28.00000000	1.22642857	11.14705932	0.618439
29	-0.02011436	9.09660430	-0.18297241		29.00000000	1.18413793	10.77163420	0.639775
30	-0.00995155	9.09585190	-0.09051786		30.00000000	1.14466667	10.41171847	0.661165
31	-0.00069004	9.08279800	-0.00626747		31.00000000	1.10774194	10.06139624	0.682758
32	0.00944429	9.08910080	0.08584006		32.00000000	1.07312500	9.75374130	0.704136
33	0.01925776	9.09104730	0.17507321		33.00000000	1.04060606	9.46019892	0.725499
34	0.02941210	9.08500580	0.26720905		34.00000000	1.01000000	9.17585586	0.746870
35	0.03924566	9.09328370	0.35687193		35.00000000	0.98114286	8.92181035	0.768374
36	0.04939851	9.08417800	0.44874484		36.00000000	0.95388889	8.66529646	0.789766
37	0.05920454	9.09924790	0.53871680		37.00000000	0.92810811	8.44508575	0.811115
38	0.06933953	9.08006760	0.62960761		38.00000000	0.90368421	8.20551372	0.832507
39	0.07951768	9.08483220	0.72240475		39.00000000	0.88051282	7.99931122	0.853989
40	0.08934083	9.09669780	0.81270651		40.00000000	0.85850000	7.80951506	0.875380
41	0.09945795	9.08699510	0.90377390		41.00000000	0.83756098	7.61091248	0.896734
42	0.10927440	9.08062650	0.99228001		42.00000000	0.81761905	7.42449319	0.918104
43	0.11940938	9.09788320	1.08637259		43.00000000	0.79860465	7.26561184	0.939582
44	0.12922435	9.09135910	1.17482497		44.00000000	0.78045455	7.09539253	0.960978
45	0.13942483	9.10728550	1.26978173		45.00000000	0.76311111	6.94987076	0.982361
46	0.14922640	9.07489870	1.35421446		46.00000000	0.74652174	6.77460916	1.003704
47	0.15938072	9.09061340	1.44886851		47.00000000	0.73063830	6.64195030	1.025160
48	0.16949041	9.09074020	1.54079328		48.00000000	0.71541667	6.50366705	1.046532
49	0.17934407	9.09118370	1.63044989		49.00000000	0.70081633	6.37124996	1.067918
50	0.18944184	9.08321860	1.72074164		50.00000000	0.68680000	6.23835453	1.089290
51	0.19928731	9.08779430	1.81108208		51.00000000	0.67333333	6.11911483	1.110771
52	0.20941783	9.08835510	1.90326360		52.00000000	0.66038462	6.00180989	1.132151
53	0.21921048	9.08895110	1.99239333		53.00000000	0.64792453	5.88895435	1.153532
54	0.22935662	9.09193330	2.08529509		54.00000000	0.63592593	5.78179610	1.175011
55	0.23921251	9.08616920	2.17352534		55.00000000	0.62436364	5.67307364	1.196403
56	0.24936387	9.09910490	2.26898801		56.00000000	0.61321429	5.57970111	1.217760
57	0.25949737	9.08209510	2.35677979		57.00000000	0.60245614	5.47156396	1.239132
58	0.26936072	9.09600350	2.45010605		58.00000000	0.59206897	5.38546138	1.260617
59	0.27948973	9.07561490	2.53654116		59.00000000	0.58203390	5.28231552	1.281997
60	0.28930619	9.09926510	2.63247372		60.00000000	0.57233333	5.20781273	1.303338
61	0.29947242	9.08009720	2.71923868		61.00000000	0.56295082	5.11164816	1.324724
62	0.30927399	9.10001280	2.81439727		62.00000000	0.55387097	5.04023290	1.346198
63	0.31943503	9.08666130	2.90259792		63.00000000	0.54507937	4.95295157	1.367575
64	0.32926413	9.09249590	2.99383275		64.00000000	0.53656250	4.87869233	1.388932
65	0.33936116	9.08385940	3.08270906		65.00000000	0.52830769	4.79907280	1.410307
66	0.34920812	9.08538820	3.17269133		66.00000000	0.52030303	4.72715501	1.431785
67	0.35935873	9.09175110	3.26720013		67.00000000	0.51253731	4.65986168	1.453164
68	0.36951008	9.07004740	3.35147394		68.00000000	0.50500000	4.58037394	1.474522
69	0.37933251	9.09305290	3.44929058		69.00000000	0.49768116	4.52544111	1.495891
70	0.38947940	9.07887940	3.53603650		70.00000000	0.49057143	4.45383884	1.517365
71	0.39932635	9.08290960	3.62704514		71.00000000	0.48366197	4.39305797	1.538742
72	0.40945017	9.07469370	3.71563488		72.00000000	0.47694444	4.32812475	1.560107
73	0.41928822	9.08529760	3.80935826		73.00000000	0.47041096	4.27382356	1.581486
74	0.42942321	9.07285400	3.89609409		74.00000000	0.46405405	4.21029468	1.602963
75	0.43923146	9.08078190	3.98856509		75.00000000	0.45786667	4.15778734	1.624341
76	0.44936198	9.06644440	4.07411541		76.00000000	0.45184211	4.09660132	1.645702
77	0.45949474	9.07508370	4.16995323		77.00000000	0.44597403	4.04725161	1.667068
78	0.46937519	9.06034090	4.25269923		78.00000000	0.44025641	3.98887316	1.688553
79	0.47950944	9.06358340	4.34607380		79.00000000	0.43468354	3.93979056	1.709939
80	0.48931175	9.04102990	4.42388216		80.00000000	0.42925000	3.88086208	1.731328
81	0.49948096	9.03532220	4.51297141		81.00000000	0.42395062	3.83053042	1.752676
82	0.50926167	9.02071090	4.59390230		82.00000000	0.41878049	3.77769771	1.774152
83	0.51943535	8.98472400	4.66698326		83.00000000	0.41373494	3.71729424	1.795539
84	0.52921832	8.95645430	4.73991970		84.00000000	0.40880952	3.66148382	1.816929
85	0.53932726	8.90702630	4.80380209		85.00000000	0.40400000	3.59843863	1.838409
86	0.54948384	8.83220390	4.85315331		86.00000000	0.39930233	3.52671956	1.859804
87	0.55930477	8.73515030	4.88561123		87.00000000	0.39471264	3.44787427	1.881150
88	0.56945539	8.58307270	4.88767701		88.00000000	0.39022727	3.34934905	1.902523
89	0.57924652	8.40958600	4.87122343		89.00000000	0.38584270	3.24477734	1.923995
90	0.58937478	8.12731270	4.79003313		90.00000000	0.38155556	3.10102131	1.945363
91	0.59918678	7.76819090	4.65459729		91.00000000	0.37736264	2.93142501	1.966719
92	0.60931283	7.29093220	4.44245853		92.00000000	0.37326087	2.72141969	1.988199
93	0.61911440	6.66781760	4.12814189		93.00000000	0.36924731	2.46207372	2.009707
94	0.62919730	5.81863260	3.66106792		94.00000000	0.36531915	2.12565791	2.031101
95	0.63933450	4.74662920	3.03468381		95.00000000	0.36147368	1.71578154	2.052443
96	0.64911973	3.43757390	2.23139704		96.00000000	0.35770833	1.22964883	2.073870
97	0.65926737	1.78256180	1.17518483		97.00000000	0.35402062	0.63106363	2.095362
98	0.66894090	-0.14378661	-0.09618474		98.00000000	0.35040816	-0.05038400	2.116738
99	0.67906547	-2.49656750	-1.69533278		99.00000000	0.34686869	-0.86598109	2.138070
100	0.68878520	-5.17026950	-3.56120511		100.00000000	0.34340000	-1.77547055	2.159446
101	0.69905412	-8.39434620	-5.86810230		101.00000000	0.34000000	-2.85407771	2.180922
