# Supplementary material for: Study on the Electrical Injection Regeneration of Industrialized B-Doped Czochralski Silicon PERC Solar Cells
Source: Hindawi journal article supplement (doi:10.1155/2019/5357370), 2019-06-20
Supplement: f1 [file 5357370.f1.zip › section3.3/IVRawData_3-6-11h.csv]

10:32 04/04/2018
Test Lot:	JK-PERC
Recipe:	Recipe_YJX-LID
Cell Name:	3-6-11h
Test Order:	2
Test Condition:	Light
1	-0.29995915	9.08980270	-2.72656949		1.00000000	34.34000000	312.14382472	0.000000
2	-0.29010668	9.08449940	-2.63547396		2.00000000	17.17000000	155.98085470	0.061793
3	-0.27999073	9.08420370	-2.54349283		3.00000000	11.44666667	103.98385169	0.083210
4	-0.27018216	9.08401200	-2.45433798		4.00000000	8.58500000	77.98624302	0.104723
5	-0.26000962	9.08927540	-2.36329904		5.00000000	6.86800000	62.42514345	0.126116
6	-0.24986540	9.08353810	-2.26966188		6.00000000	5.72333333	51.98811639	0.147472
7	-0.24004714	9.08838460	-2.18164073		7.00000000	4.90571429	44.58501817	0.168887
8	-0.22990811	9.07660390	-2.08678485		8.00000000	4.29250000	38.96132224	0.190364
9	-0.22008167	9.09268670	-2.00113367		9.00000000	3.81555556	34.69365125	0.211737
10	-0.20992404	9.09021380	-1.90825441		10.00000000	3.43400000	31.21579419	0.233088
11	-0.20011026	9.08995630	-1.81899352		11.00000000	3.12181818	28.37719085	0.254466
12	-0.18997049	9.08039190	-1.72500650		12.00000000	2.86166667	25.98505482	0.275950
13	-0.18016042	9.09209250	-1.63803520		13.00000000	2.64153846	24.01711203	0.297325
14	-0.17005488	9.08069230	-1.54421604		14.00000000	2.45285714	22.27364097	0.318667
15	-0.16020463	9.08676720	-1.45574218		15.00000000	2.28933333	20.80263904	0.340032
16	-0.15004700	9.07791230	-1.36211351		16.00000000	2.14625000	19.48346927	0.361508
17	-0.13993029	9.09339620	-1.27244157		17.00000000	2.02000000	18.36866032	0.382891
18	-0.13010758	9.09173390	-1.18290350		18.00000000	1.90777778	17.34500790	0.404237
19	-0.12001247	9.09330460	-1.09130995		19.00000000	1.80736842	16.43495158	0.425615
20	-0.11015179	9.07210450	-0.99930855		20.00000000	1.71700000	15.57680343	0.447119
21	-0.10001276	9.08356480	-0.90847239		21.00000000	1.63523810	14.85379120	0.468499
22	-0.09018707	9.07219310	-0.81819454		22.00000000	1.56090909	14.16086868	0.489855
23	-0.08002572	9.09344960	-0.72770983		23.00000000	1.49304348	13.57691562	0.511227
24	-0.07019407	9.08053400	-0.63739960		24.00000000	1.43083333	12.99273073	0.532712
25	-0.06007737	9.09528540	-0.54642082		25.00000000	1.37360000	12.49328403	0.554084
26	-0.04991974	9.05722810	-0.45213444		26.00000000	1.32076923	11.96250819	0.575470
27	-0.04008958	9.09553430	-0.36463612		27.00000000	1.27185185	11.56817214	0.596842
28	-0.02994088	9.08053870	-0.27187927		28.00000000	1.22642857	11.13663211	0.618314
29	-0.02011965	9.08666230	-0.18282044		29.00000000	1.18413793	10.75986150	0.639697
30	-0.00999104	9.08764360	-0.09079501		30.00000000	1.14466667	10.40232271	0.661125
31	-0.00071461	9.08437060	-0.00649176		31.00000000	1.10774194	10.06313827	0.682580
32	0.00943761	9.08206270	0.08571296		32.00000000	1.07312500	9.74618853	0.704057
33	0.01928461	9.10162730	0.17552130		33.00000000	1.04060606	9.47120853	0.725446
34	0.02940474	9.07194900	0.26675829		34.00000000	1.01000000	9.16266849	0.746835
35	0.03924950	9.08883860	0.35673239		35.00000000	0.98114286	8.91744907	0.768323
36	0.04940387	9.08835120	0.44899971		36.00000000	0.95388889	8.66927723	0.789719
37	0.05919356	9.08988480	0.53806263		37.00000000	0.92810811	8.43639578	0.811070
38	0.06937695	9.08487800	0.63028115		38.00000000	0.90368421	8.20986080	0.832439
39	0.07949262	9.09010510	0.72259628		39.00000000	0.88051282	8.00395408	0.853906
40	0.08934110	9.08905220	0.81202596		40.00000000	0.85850000	7.80295131	0.875279
41	0.09948356	9.08604340	0.90391198		41.00000000	0.83756098	7.61011537	0.896641
42	0.10929484	9.09155850	0.99366043		42.00000000	0.81761905	7.43343140	0.918020
43	0.11943581	9.08302590	1.08483856		43.00000000	0.79860465	7.25374673	0.939489
44	0.12926197	9.08641720	1.17452819		44.00000000	0.78045455	7.09153561	0.960873
45	0.13941336	9.08186050	1.26613269		45.00000000	0.76311111	6.93046866	0.982218
46	0.14920899	9.08900550	1.35616133		46.00000000	0.74652174	6.78514019	1.003595
47	0.15941174	9.08417030	1.44812339		47.00000000	0.73063830	6.63724273	1.025085
48	0.16952145	9.08185100	1.53956855		48.00000000	0.71541667	6.49730757	1.046454
49	0.17930296	9.08706090	1.62933692		49.00000000	0.70081633	6.36836064	1.067791
50	0.18947072	9.07370470	1.71920136		50.00000000	0.68680000	6.23182039	1.089172
51	0.19927157	9.09328750	1.81203368		51.00000000	0.67333333	6.12281358	1.110653
52	0.20941925	9.07546710	1.90057751		52.00000000	0.66038462	5.99329885	1.132046
53	0.21923648	9.07931900	1.99051794		53.00000000	0.64792453	5.88271348	1.153394
54	0.22937372	9.08308600	2.08342122		54.00000000	0.63592593	5.77616987	1.174765
55	0.23921849	9.07076450	2.16989459		55.00000000	0.62436364	5.66345551	1.196237
56	0.24934532	9.08593270	2.26553480		56.00000000	0.61321429	5.57162373	1.217607
57	0.25949672	9.07342910	2.35452509		57.00000000	0.60245614	5.46634308	1.238952
58	0.26933849	9.09143160	2.44867246		58.00000000	0.59206897	5.38275450	1.260333
59	0.27949360	9.08193590	2.53834296		59.00000000	0.58203390	5.28599456	1.281816
60	0.28927585	9.09606460	2.63127182		60.00000000	0.57233333	5.20598097	1.303184
61	0.29940194	9.08176420	2.71909782		61.00000000	0.56295082	5.11258660	1.324568
62	0.30923107	9.08348270	2.80889507		62.00000000	0.55387097	5.03107735	1.345913
63	0.31941149	9.08929730	2.90322599		63.00000000	0.54507937	4.95438840	1.367382
64	0.32922873	9.07729630	2.98850673		64.00000000	0.53656250	4.87053680	1.388773
65	0.33935556	9.07923700	3.08108956		65.00000000	0.52830769	4.79663075	1.410162
66	0.34919360	9.08652210	3.17295536		66.00000000	0.52030303	4.72774498	1.431605
67	0.35935169	9.07439710	3.26089993		67.00000000	0.51253731	4.65096711	1.453066
68	0.36954477	9.08628370	3.35778862		68.00000000	0.50500000	4.58857327	1.474438
69	0.37932849	9.07374480	3.44192991		69.00000000	0.49768116	4.51583183	1.495831
70	0.38946575	9.07343960	3.53379396		70.00000000	0.49057143	4.45117023	1.517181
71	0.39930233	9.08696940	3.62844805		71.00000000	0.48366197	4.39502154	1.538674
72	0.40942097	9.06846430	3.71281945		72.00000000	0.47694444	4.32515367	1.560095
73	0.41925383	9.08281040	3.80800305		73.00000000	0.47041096	4.27265355	1.581458
74	0.42943871	9.07018380	3.89508803		74.00000000	0.46405405	4.20905556	1.602816
75	0.43919790	9.06875990	3.98298030		75.00000000	0.45786667	4.15228287	1.624285
76	0.44936788	9.06229780	4.07230555		76.00000000	0.45184211	4.09472772	1.645668
77	0.45952746	9.06241130	4.16442685		77.00000000	0.44597403	4.04160005	1.667045
78	0.46937370	9.06591420	4.25530169		78.00000000	0.44025641	3.99132684	1.688404
79	0.47952732	9.03744130	4.33370001		79.00000000	0.43468354	3.92842702	1.709871
80	0.48936167	9.05404000	4.43070013		80.00000000	0.42925000	3.88644667	1.731251
81	0.49948999	9.02216430	4.50648076		81.00000000	0.42395062	3.82495212	1.752635
82	0.50926632	9.01052000	4.58875436		82.00000000	0.41878049	3.77342996	1.774125
83	0.51944447	8.97577380	4.66241606		83.00000000	0.41373494	3.71359123	1.795504
84	0.52920216	8.95249560	4.73768001		84.00000000	0.40880952	3.65986546	1.816847
85	0.53932381	8.89887050	4.79937274		85.00000000	0.40400000	3.59514368	1.838214
86	0.54950345	8.82380010	4.84870860		86.00000000	0.39930233	3.52336390	1.859693
87	0.55932736	8.71677970	4.87553338		87.00000000	0.39471264	3.44062316	1.881085
88	0.56942815	8.59192280	4.89248270		88.00000000	0.39022727	3.35280260	1.902420
89	0.57922381	8.38580320	4.85725688		89.00000000	0.38584270	3.23560092	1.923794
90	0.58935958	8.12199500	4.78677556		90.00000000	0.38155556	3.09899231	1.945276
91	0.59915519	7.76236150	4.65085918		91.00000000	0.37736264	2.92922521	1.966648
92	0.60928053	7.27142720	4.43033902		92.00000000	0.37326087	2.71413924	1.988112
93	0.61909628	6.63455870	4.10743061		93.00000000	0.36924731	2.44979297	2.009512
94	0.62917775	5.79759840	3.64771992		94.00000000	0.36531915	2.11797371	2.031024
95	0.63932914	4.71913000	3.01707732		95.00000000	0.36147368	1.70584131	2.052407
96	0.64910167	3.39534090	2.20392145		96.00000000	0.35770833	1.21454173	2.073751
97	0.65925008	1.75870980	1.15942958		97.00000000	0.35402062	0.62261953	2.095133
98	0.66896242	-0.15701428	-0.10503665		98.00000000	0.35040816	-0.05501909	2.116614
99	0.67903340	-2.51591250	-1.70838862		99.00000000	0.34686869	-0.87269127	2.137998
100	0.68877918	-5.18469000	-3.57110653		100.00000000	0.34340000	-1.78042255	2.159355
101	0.69897449	-8.38585090	-5.86149586		101.00000000	0.34000000	-2.85118931	2.180729
10:33 04/04/2018
Test Lot:	JK-PERC
Recipe:	Recipe_YJX-LID
Cell Name:	3-6-11h
Test Order:	3
Test Condition:	Light
1	-0.29993752	9.08678050	-2.72546641		1.00000000	34.34000000	312.04004237	0.000000
2	-0.29014978	9.08382510	-2.63566985		2.00000000	17.17000000	155.96927697	0.061790
3	-0.28001672	9.08827780	-2.54486974		3.00000000	11.44666667	104.03048655	0.083203
4	-0.27019846	9.08244130	-2.45406165		4.00000000	8.58500000	77.97275856	0.104703
5	-0.26005498	9.09215450	-2.36446006		5.00000000	6.86800000	62.44491711	0.126108
6	-0.24988990	9.07648180	-2.26812113		6.00000000	5.72333333	51.94773084	0.147457
7	-0.24007984	9.09415250	-2.18332268		7.00000000	4.90571429	44.61331384	0.168827
8	-0.22989616	9.08977130	-2.08970352		8.00000000	4.29250000	39.01784331	0.190295
9	-0.22013001	9.08708290	-2.00033965		9.00000000	3.81555556	34.67226964	0.211660
10	-0.20991433	9.08087440	-1.90620567		10.00000000	3.43400000	31.18372269	0.233081
11	-0.20013700	9.08883480	-1.81901213		11.00000000	3.12181818	28.37368973	0.254472
12	-0.18998384	9.08121970	-1.72528499		12.00000000	2.86166667	25.98742371	0.275954
13	-0.18021695	9.09073260	-1.63830410		13.00000000	2.64153846	24.01351981	0.297340
14	-0.17003997	9.08531860	-1.54486730		14.00000000	2.45285714	22.28498862	0.318735
15	-0.16022097	9.08627990	-1.45581258		15.00000000	2.28933333	20.80152345	0.340090
16	-0.15007079	9.08279510	-1.36306224		16.00000000	2.14625000	19.49394898	0.361568
17	-0.13992953	9.09426880	-1.27255676		17.00000000	2.02000000	18.37042298	0.382948
18	-0.13009490	9.08100130	-1.18139196		18.00000000	1.90777778	17.32453248	0.404325
19	-0.11997895	9.07897850	-1.08928631		19.00000000	1.80736842	16.40905904	0.425740
20	-0.11012796	9.07983970	-0.99994422		20.00000000	1.71700000	15.59008476	0.447205
21	-0.09995692	9.09513000	-0.90912120		21.00000000	1.63523810	14.87270306	0.468585
22	-0.09015356	9.08109760	-0.81869328		22.00000000	1.56090909	14.17476780	0.489969
23	-0.07998328	9.08668230	-0.72678265		23.00000000	1.49304348	13.56681175	0.511320
24	-0.07017098	9.08405210	-0.63743687		24.00000000	1.43083333	12.99776455	0.532813
25	-0.06000963	9.08433720	-0.54514771		25.00000000	1.37360000	12.47824558	0.554201
26	-0.04988028	9.08636670	-0.45323052		26.00000000	1.32076923	12.00099356	0.575553
27	-0.04005905	9.07730100	-0.36362807		27.00000000	1.27185185	11.54498209	0.596916
28	-0.02990366	9.08608440	-0.27170714		28.00000000	1.22642857	11.14343351	0.618389
29	-0.02008689	9.08056740	-0.18240039		29.00000000	1.18413793	10.75264429	0.639774
30	-0.00997541	9.08046050	-0.09058129		30.00000000	1.14466667	10.39410045	0.661158
31	-0.00066772	9.08843800	-0.00606852		31.00000000	1.10774194	10.06764390	0.682616
32	0.00945175	9.08254340	0.08584592		32.00000000	1.07312500	9.74670439	0.704088
33	0.01927865	9.08365440	0.17512058		33.00000000	1.04060606	9.45250582	0.725474
34	0.02939878	9.08025360	0.26694836		34.00000000	1.01000000	9.17105614	0.746856
35	0.03925471	9.08737280	0.35672215		35.00000000	0.98114286	8.91601091	0.768325
36	0.04939790	9.08947940	0.44900123		36.00000000	0.95388889	8.67035341	0.789711
37	0.05918685	9.08147340	0.53750380		37.00000000	0.92810811	8.42858910	0.811068
38	0.06934568	9.08142850	0.62975786		38.00000000	0.90368421	8.20674354	0.832440
39	0.07947549	9.09132190	0.72253722		39.00000000	0.88051282	8.00502549	0.853932
40	0.08930090	9.08301730	0.81112163		40.00000000	0.85850000	7.79777035	0.875308
41	0.09948131	9.09629150	0.90491097		41.00000000	0.83756098	7.61869878	0.896648
42	0.10924793	9.08457570	0.99247109		42.00000000	0.81761905	7.42772213	0.918038
43	0.11940899	9.09103300	1.08555107		43.00000000	0.79860465	7.26014124	0.939511
44	0.12920910	9.08073430	1.17331351		44.00000000	0.78045455	7.08710036	0.960886
45	0.13939101	9.08870510	1.26688378		45.00000000	0.76311111	6.93569185	0.982250
46	0.14921194	9.08480640	1.35556159		46.00000000	0.74652174	6.78200547	1.003617
47	0.15936482	9.08598800	1.44798684		47.00000000	0.73063830	6.63857081	1.025095
48	0.16952142	9.08137800	1.53948809		48.00000000	0.71541667	6.49696918	1.046461
49	0.17931260	9.07984450	1.62813052		49.00000000	0.70081633	6.36330327	1.067798
50	0.18949598	9.08658890	1.72187207		50.00000000	0.68680000	6.24066926	1.089177
51	0.19927377	9.08154870	1.80971445		51.00000000	0.67333333	6.11490946	1.110648
52	0.20943409	9.08086780	1.90184328		52.00000000	0.66038462	5.99686539	1.132026
53	0.21925876	9.09335610	1.99379798		53.00000000	0.64792453	5.89180846	1.153379
54	0.22940271	9.08483790	2.08408643		54.00000000	0.63592593	5.77728395	1.174747
55	0.23921546	9.07952790	2.17196344		55.00000000	0.62436364	5.66892706	1.196231
56	0.24939215	9.08974460	2.26691095		56.00000000	0.61321429	5.57396124	1.217622
57	0.25953016	9.08799080	2.35860771		57.00000000	0.60245614	5.47511586	1.238996
58	0.26930717	9.08271310	2.44603976		58.00000000	0.59206897	5.37759255	1.260365
59	0.27948833	9.07660200	2.53680434		59.00000000	0.58203390	5.28289005	1.281852
60	0.28931895	9.08518310	2.62851564		60.00000000	0.57233333	5.19975313	1.303219
61	0.29946515	9.09117320	2.72248955		61.00000000	0.56295082	5.11788340	1.324610
62	0.30927119	9.07700730	2.80725685		62.00000000	0.55387097	5.02749082	1.345965
63	0.31945905	9.08242990	2.90146443		63.00000000	0.54507937	4.95064512	1.367439
64	0.32921600	9.08186050	2.98989379		64.00000000	0.53656250	4.87298577	1.388819
65	0.33939865	9.08097460	3.08207052		65.00000000	0.52830769	4.79754873	1.410196
66	0.34922034	9.07805250	3.17024058		66.00000000	0.52030303	4.72333823	1.431668
67	0.35931963	9.07310580	3.26014502		67.00000000	0.51253731	4.65030527	1.453054
68	0.36949334	9.08791070	3.35792248		68.00000000	0.50500000	4.58939490	1.474412
69	0.37934107	9.06976410	3.44053402		69.00000000	0.49768116	4.51385071	1.495788
70	0.38946566	9.07625480	3.53488957		70.00000000	0.49057143	4.45255128	1.517276
71	0.39927769	9.08480450	3.62735975		71.00000000	0.48366197	4.39397446	1.538654
72	0.40944174	9.06645300	3.71218429		72.00000000	0.47694444	4.32419439	1.560001
73	0.41926715	9.07012840	3.80280688		73.00000000	0.47041096	4.26668780	1.581389
74	0.42940214	9.06495290	3.89251017		74.00000000	0.46405405	4.20662814	1.602875
75	0.43921044	9.07776360	3.98704854		75.00000000	0.45786667	4.15640536	1.624255
76	0.44940278	9.05316350	4.06851684		76.00000000	0.45184211	4.09060046	1.645594
77	0.45951769	9.07974820	4.17230492		77.00000000	0.44597403	4.04933186	1.666965
78	0.46941009	9.05091090	4.24858890		78.00000000	0.44025641	3.98472154	1.688440
79	0.47952947	9.03728580	4.33364487		79.00000000	0.43468354	3.92835942	1.709817
80	0.48934001	9.04670330	4.42691388		80.00000000	0.42925000	3.88329739	1.731181
81	0.49946684	9.01892280	4.50465287		81.00000000	0.42395062	3.82357789	1.752555
82	0.50930488	9.00126930	4.58439038		82.00000000	0.41878049	3.76955595	1.774038
83	0.51945031	8.98680110	4.66819662		83.00000000	0.41373494	3.71815361	1.795402
84	0.52923036	8.94676780	4.73490114		84.00000000	0.40880952	3.65752388	1.816753
85	0.53936464	8.88435550	4.79190721		85.00000000	0.40400000	3.58927962	1.838126
86	0.54950857	8.82197000	4.84774812		86.00000000	0.39930233	3.52263314	1.859605
87	0.55932277	8.71638200	4.87527092		87.00000000	0.39471264	3.44046618	1.880989
88	0.56946081	8.58291240	4.88763225		88.00000000	0.39022727	3.34928650	1.902412
89	0.57927877	8.39183430	4.86121145		89.00000000	0.38584270	3.23792798	1.923800
90	0.58939070	8.12435910	4.78842170		90.00000000	0.38155556	3.09989435	1.945299
91	0.59919232	7.76284220	4.65143543		91.00000000	0.37736264	2.92940661	1.966683
92	0.60931391	7.25909190	4.42306567		92.00000000	0.37326087	2.70953495	1.988173
93	0.61911553	6.63728570	4.10924665		93.00000000	0.36924731	2.45079990	2.009530
94	0.62921554	5.78165820	3.63790919		94.00000000	0.36531915	2.11215045	2.031019
95	0.63935578	4.70700500	3.00945085		95.00000000	0.36147368	1.70145844	2.052404
96	0.64914173	3.39851900	2.20612050		96.00000000	0.35770833	1.21567857	2.073779
97	0.65924847	1.74695480	1.15167728		97.00000000	0.35402062	0.61845802	2.095270
98	0.66896152	-0.17522490	-0.11721872		98.00000000	0.35040816	-0.06140024	2.116662
99	0.67904443	-2.52864600	-1.71706298		99.00000000	0.34686869	-0.87710812	2.138009
100	0.68875897	-5.19486280	-3.57800835		100.00000000	0.34340000	-1.78391589	2.159384
101	0.69902867	-8.40479660	-5.87519379		101.00000000	0.34000000	-2.85763084	2.180872
10:33 04/04/2018
Test Lot:	JK-PERC
Recipe:	Recipe_YJX-LID
Cell Name:	3-6-11h
Test Order:	4
Test Condition:	Light
1	-0.29994595	9.09952350	-2.72936522		1.00000000	34.34000000	312.47763699	0.000000
2	-0.29009852	9.08745100	-2.63625609		2.00000000	17.17000000	156.03153367	0.061788
3	-0.27999657	9.07882790	-2.54204067		3.00000000	11.44666667	103.92231670	0.083220
4	-0.27017593	9.09231760	-2.45652536		4.00000000	8.58500000	78.05754660	0.104573
5	-0.26001143	9.08389950	-2.36191770		5.00000000	6.86800000	62.38822177	0.126061
6	-0.24982983	9.08809190	-2.27047645		6.00000000	5.72333333	52.01417931	0.147444
7	-0.24002780	9.08655640	-2.18102614		7.00000000	4.90571429	44.57604954	0.168819
8	-0.22987895	9.08710770	-2.08893478		8.00000000	4.29250000	39.00640980	0.190296
9	-0.22001588	9.07521150	-1.99669064		9.00000000	3.81555556	34.62697366	0.211736
10	-0.20991094	9.08889290	-1.90785805		10.00000000	3.43400000	31.21125822	0.233102
11	-0.20011933	9.08575730	-1.81823566		11.00000000	3.12181818	28.36408233	0.254482
12	-0.18998982	9.08004280	-1.72511570		12.00000000	2.86166667	25.98405581	0.275979
13	-0.18019672	9.08049010	-1.63627453		13.00000000	2.64153846	23.98646385	0.297356
14	-0.17005605	9.08016970	-1.54413779		14.00000000	2.45285714	22.27235911	0.318694
15	-0.16024360	9.08614440	-1.45599649		15.00000000	2.28933333	20.80121325	0.340079
16	-0.15009549	9.08834740	-1.36411996		16.00000000	2.14625000	19.50586561	0.361547
17	-0.13993174	9.08409020	-1.27115255		17.00000000	2.02000000	18.34986220	0.382924
18	-0.13010515	9.08876800	-1.18249552		18.00000000	1.90777778	17.33934962	0.404263
19	-0.11996821	9.08091450	-1.08942106		19.00000000	1.80736842	16.41255810	0.425630
20	-0.11012524	9.08533190	-1.00052436		20.00000000	1.71700000	15.59951487	0.447127
21	-0.09998234	9.08876320	-0.90871578		21.00000000	1.63523810	14.86229182	0.468518
22	-0.09015723	9.07368950	-0.81805874		22.00000000	1.56090909	14.16320443	0.489863
23	-0.08003070	9.08747100	-0.72727668		23.00000000	1.49304348	13.56798931	0.511245
24	-0.07018849	9.08485410	-0.63765215		24.00000000	1.43083333	12.99891207	0.532727
25	-0.06004186	9.08364960	-0.54539922		25.00000000	1.37360000	12.47730109	0.554095
26	-0.04991012	9.07467940	-0.45291835		26.00000000	1.32076923	11.98555733	0.575459
27	-0.04005525	9.09009840	-0.36410615		27.00000000	1.27185185	11.56125848	0.596828
28	-0.02990862	9.07901000	-0.27154068		28.00000000	1.22642857	11.13475726	0.618309
29	-0.02008501	9.07802870	-0.18233229		29.00000000	1.18413793	10.74963812	0.639695
30	-0.00994880	9.08521180	-0.09038699		30.00000000	1.14466667	10.39953911	0.661063
31	-0.00065883	9.07995800	-0.00598217		31.00000000	1.10774194	10.05825025	0.682551
32	0.00948089	9.07627770	0.08605117		32.00000000	1.07312500	9.73998051	0.704030
33	0.01929678	9.08366780	0.17528552		33.00000000	1.04060606	9.45251977	0.725410
34	0.02945205	9.08231930	0.26749288		34.00000000	1.01000000	9.17314249	0.746813
35	0.03924859	9.08259300	0.35647893		35.00000000	0.98114286	8.91132125	0.768159
36	0.04943065	9.08088400	0.44887396		36.00000000	0.95388889	8.66215435	0.789638
37	0.05922719	9.08032990	0.53780240		37.00000000	0.92810811	8.42752780	0.811021
38	0.06940999	9.08159830	0.63035364		38.00000000	0.90368421	8.20689699	0.832408
39	0.07953251	9.09191890	0.72310315		39.00000000	0.88051282	8.00555115	0.853886
40	0.08935733	9.09031870	0.81228662		40.00000000	0.85850000	7.80403860	0.875278
41	0.09951558	9.08232590	0.90383293		41.00000000	0.83756098	7.60700174	0.896622
42	0.10930169	9.07187080	0.99157081		42.00000000	0.81761905	7.41733436	0.917989
43	0.11943389	9.08227440	1.08473136		43.00000000	0.79860465	7.25314658	0.939468
44	0.12926243	9.07660010	1.17326339		44.00000000	0.78045455	7.08387381	0.960866
45	0.13941920	9.08416840	1.26650749		45.00000000	0.76311111	6.93222984	0.982229
46	0.14921945	9.07990260	1.35489807		46.00000000	0.74652174	6.77834468	1.003606
47	0.15940672	9.07570360	1.44672814		47.00000000	0.73063830	6.63105663	1.025078
48	0.16954190	9.08344750	1.54002495		48.00000000	0.71541667	6.49844973	1.046463
49	0.17935704	9.07990930	1.62854566		49.00000000	0.70081633	6.36334868	1.067820
50	0.18948849	9.07241440	1.71911811		50.00000000	0.68680000	6.23093421	1.089193
51	0.19926494	9.09090420	1.81149848		51.00000000	0.67333333	6.12120883	1.110672
52	0.20942913	9.06931020	1.89937774		52.00000000	0.66038462	5.98923293	1.132042
53	0.21925098	9.06594090	1.98771643		53.00000000	0.64792453	5.87404548	1.153384
54	0.22941369	9.07742120	2.08248469		54.00000000	0.63592593	5.77256748	1.174758
55	0.23921916	9.07465270	2.17083080		55.00000000	0.62436364	5.66588316	1.196233
56	0.24938112	9.08393960	2.26536303		56.00000000	0.61321429	5.57040153	1.217622
57	0.25952971	9.07229140	2.35452916		57.00000000	0.60245614	5.46565766	1.238989
58	0.26933888	9.08722110	2.44754195		58.00000000	0.59206897	5.38026160	1.260369
59	0.27948895	9.08751300	2.53985947		59.00000000	0.58203390	5.28924062	1.281841
60	0.28931972	9.07063390	2.62431326		60.00000000	0.57233333	5.19142614	1.303221
61	0.29947796	9.08764650	2.72154984		61.00000000	0.56295082	5.11589805	1.324591
62	0.30927005	9.07324220	2.80608207		62.00000000	0.55387097	5.02540544	1.345960
63	0.31941488	9.09720420	2.90578239		63.00000000	0.54507937	4.95869829	1.367445
64	0.32923970	9.06904030	2.98588811		64.00000000	0.53656250	4.86610694	1.388818
65	0.33941433	9.07127480	3.07892066		65.00000000	0.52830769	4.79242426	1.410215
66	0.34923393	9.08682060	3.17342607		66.00000000	0.52030303	4.72790029	1.431559
67	0.35937804	9.08033660	3.26327357		67.00000000	0.51253731	4.65401133	1.453032
68	0.36954895	9.07662200	3.35425613		68.00000000	0.50500000	4.58369411	1.474424
69	0.37935218	9.07438370	3.44238724		69.00000000	0.49768116	4.51614980	1.495804
70	0.38949925	9.07727240	3.53559079		70.00000000	0.49057143	4.45305049	1.517282
71	0.39932111	9.07443050	3.62361166		71.00000000	0.48366197	4.38895695	1.538677
72	0.40948009	9.06652830	3.71256282		72.00000000	0.47694444	4.32423030	1.560024
73	0.41928408	9.07763290	3.80610696		73.00000000	0.47041096	4.27021800	1.581416
74	0.42942521	9.05977630	3.89049634		74.00000000	0.46405405	4.20422592	1.602889
75	0.43925673	9.05904870	3.97924811		75.00000000	0.45786667	4.14783643	1.624266
76	0.44942537	9.06754110	4.07518301		76.00000000	0.45184211	4.09709686	1.645614
77	0.45955014	9.05378150	4.16066656		77.00000000	0.44597403	4.03775139	1.666984
78	0.46941069	9.07348920	4.25919283		78.00000000	0.44025641	3.99466178	1.688467
79	0.47952574	9.03479480	4.33241666		79.00000000	0.43468354	3.92727663	1.709859
80	0.48934314	9.03612330	4.42176495		80.00000000	0.42925000	3.87875593	1.731216
81	0.49949393	9.01979160	4.50533115		81.00000000	0.42395062	3.82394622	1.752586
82	0.50930238	9.00293920	4.58521836		82.00000000	0.41878049	3.77025527	1.774065
83	0.51945245	8.98187070	4.66565474		83.00000000	0.41373494	3.71611373	1.795452
84	0.52923411	8.94599150	4.73452385		84.00000000	0.40880952	3.65720653	1.816793
85	0.53936702	8.90282920	4.80189246		85.00000000	0.40400000	3.59674300	1.838178
86	0.54951710	8.80955030	4.84099853		86.00000000	0.39930233	3.51767392	1.859656
87	0.55931437	8.70825390	4.87065154		87.00000000	0.39471264	3.43725792	1.881022
88	0.56946146	8.58039090	4.88620193		88.00000000	0.39022727	3.34830254	1.902382
89	0.57930565	8.39455510	4.86301320		89.00000000	0.38584270	3.23897778	1.923747
90	0.58939022	8.11808300	4.78471873		90.00000000	0.38155556	3.09749967	1.945217
91	0.59916443	7.75099370	4.64411972		91.00000000	0.37736264	2.92493542	1.966604
92	0.60931373	7.25827220	4.42256491		92.00000000	0.37326087	2.70922899	1.988077
93	0.61912292	6.61633160	4.09632254		93.00000000	0.36924731	2.44306266	2.009471
94	0.62920970	5.78328900	3.63890154		94.00000000	0.36531915	2.11274622	2.030950
95	0.63935459	4.69514040	3.00185957		95.00000000	0.36147368	1.69716970	2.052326
96	0.64910722	3.39387920	2.20299149		96.00000000	0.35770833	1.21401887	2.073721
97	0.65925801	1.72925200	1.14002323		97.00000000	0.35402062	0.61219086	2.095065
98	0.66896003	-0.19715787	-0.13189073		98.00000000	0.35040816	-0.06908573	2.116552
99	0.67902821	-2.53679510	-1.72255544		99.00000000	0.34686869	-0.87993479	2.137933
100	0.68879426	-5.20542240	-3.58546507		100.00000000	0.34340000	-1.78754205	2.159320
101	0.69904101	-8.40217690	-5.87346623		101.00000000	0.34000000	-2.85674015	2.180799
