# Supplementary material for: Study on the Electrical Injection Regeneration of Industrialized B-Doped Czochralski Silicon PERC Solar Cells
Source: Hindawi journal article supplement (doi:10.1155/2019/5357370), 2019-06-20
Supplement: f1 [file 5357370.f1.zip › section3.3/IVRawData_3-8-1.5h.csv]

00:09 04/04/2018
Test Lot:	JK-PERC
Recipe:	Recipe_YJX-LID
Cell Name:	3-8-1.5h
Test Order:	2
Test Condition:	Light
1	-0.29994151	9.10427380	-2.73074963		1.00000000	34.34000000	312.64076229	0.000000
2	-0.29011270	9.09907530	-2.63975730		2.00000000	17.17000000	156.23112290	0.061855
3	-0.27999136	9.11616610	-2.55244774		3.00000000	11.44666667	104.34971462	0.083279
4	-0.27014393	9.11025140	-2.46107912		4.00000000	8.58500000	78.21150827	0.104762
5	-0.25999284	9.11056040	-2.36868047		5.00000000	6.86800000	62.57132883	0.126154
6	-0.24987376	9.11351390	-2.27722799		6.00000000	5.72333333	52.15967789	0.147554
7	-0.24003229	9.11180880	-2.18712833		7.00000000	4.90571429	44.69993060	0.168898
8	-0.22988863	9.11211590	-2.09477184		8.00000000	4.29250000	39.11375750	0.190377
9	-0.22006056	9.10844420	-2.00440933		9.00000000	3.81555556	34.75377487	0.211765
10	-0.20992287	9.09289550	-1.90880672		10.00000000	3.43400000	31.22500315	0.233143
11	-0.20009999	9.11092570	-1.82309614		11.00000000	3.12181818	28.44265350	0.254624
12	-0.18996379	9.10142520	-1.72894123		12.00000000	2.86166667	26.04524511	0.276071
13	-0.18017441	9.10554220	-1.64058569		13.00000000	2.64153846	24.05263993	0.297439
14	-0.17001289	9.10326390	-1.54767220		14.00000000	2.45285714	22.32900588	0.318812
15	-0.16020045	9.10539150	-1.45868782		15.00000000	2.28933333	20.84527627	0.340160
16	-0.15005754	9.10449220	-1.36619770		16.00000000	2.14625000	19.54051638	0.361644
17	-0.13991910	9.10758500	-1.27432510		17.00000000	2.02000000	18.39732170	0.383042
18	-0.13009548	9.10396480	-1.18438467		18.00000000	1.90777778	17.36834174	0.404440
19	-0.11996002	9.11373620	-1.09328398		19.00000000	1.80736842	16.47187901	0.425799
20	-0.11011111	9.10750290	-1.00283725		20.00000000	1.71700000	15.63758248	0.447260
21	-0.09994885	9.11083890	-0.91061790		21.00000000	1.63523810	14.89839085	0.468638
22	-0.09015873	9.10266690	-0.82068490		22.00000000	1.56090909	14.20843552	0.490021
23	-0.07996522	9.10102460	-0.72776543		23.00000000	1.49304348	13.58822542	0.511382
24	-0.07015351	9.10045050	-0.63842856		24.00000000	1.43083333	13.02122792	0.532862
25	-0.05999498	9.10549830	-0.54628416		25.00000000	1.37360000	12.50731246	0.554237
26	-0.04983421	9.10830590	-0.45390520		26.00000000	1.32076923	12.02997018	0.575635
27	-0.04000315	9.11004640	-0.36443056		27.00000000	1.27185185	11.58662938	0.597126
28	-0.02990267	9.09932900	-0.27209424		28.00000000	1.22642857	11.15967707	0.618510
29	-0.02003663	9.10322380	-0.18239796		29.00000000	1.18413793	10.77947260	0.639880
30	-0.00993020	9.09556390	-0.09032075		30.00000000	1.14466667	10.41138881	0.661254
31	-0.00064841	9.10563180	-0.00590421		31.00000000	1.10774194	10.08669019	0.682852
32	0.00949801	9.08834930	0.08632119		32.00000000	1.07312500	9.75293484	0.704250
33	0.01932060	9.10918520	0.17599489		33.00000000	1.04060606	9.47907333	0.725596
34	0.02944609	9.09689710	0.26786808		34.00000000	1.01000000	9.18786607	0.746973
35	0.03926347	9.10473060	0.35748333		35.00000000	0.98114286	8.93304139	0.768458
36	0.04942618	9.10079100	0.44981736		36.00000000	0.95388889	8.68114342	0.789845
37	0.05926440	9.08431910	0.53837675		37.00000000	0.92810811	8.43123021	0.811206
38	0.06940479	9.11421680	0.63257028		38.00000000	0.90368421	8.23637381	0.832576
39	0.07951540	9.09850790	0.72347148		39.00000000	0.88051282	8.01135285	0.854052
40	0.08932980	9.10529520	0.81337421		40.00000000	0.85850000	7.81689593	0.875443
41	0.09947391	9.10914520	0.90612228		41.00000000	0.83756098	7.62946454	0.896797
42	0.10931361	9.10771180	0.99559686		42.00000000	0.81761905	7.44663865	0.918166
43	0.11944432	9.10103800	1.08706730		43.00000000	0.79860465	7.26813128	0.939650
44	0.12929742	9.10696220	1.17750672		44.00000000	0.78045455	7.10757004	0.961033
45	0.13944227	9.09865470	1.26873707		45.00000000	0.76311111	6.94328450	0.982382
46	0.14920682	9.10729790	1.35887096		46.00000000	0.74652174	6.79879587	1.003774
47	0.15939260	9.10391330	1.45109641		47.00000000	0.73063830	6.65166772	1.025255
48	0.16952032	9.10453700	1.54340403		48.00000000	0.71541667	6.51353751	1.046644
49	0.17935333	9.08986470	1.63029750		49.00000000	0.70081633	6.37032559	1.068046
50	0.18951158	9.10399340	1.72531217		50.00000000	0.68680000	6.25262267	1.089407
51	0.19929026	9.10278990	1.81409737		51.00000000	0.67333333	6.12921187	1.110879
52	0.20943734	9.09863760	1.90559446		52.00000000	0.66038462	6.00860029	1.132256
53	0.21923016	9.09802720	1.99456196		53.00000000	0.64792453	5.89483498	1.153625
54	0.22942115	9.10543540	2.08897946		54.00000000	0.63592593	5.79038244	1.174996
55	0.23926458	9.09788040	2.17680053		55.00000000	0.62436364	5.68038569	1.196471
56	0.24938338	9.09867290	2.26905780		56.00000000	0.61321429	5.57943620	1.217843
57	0.25955874	9.09765630	2.36137621		57.00000000	0.60245614	5.48093890	1.239231
58	0.26937166	9.10759830	2.45332887		58.00000000	0.59206897	5.39232630	1.260712
59	0.27953660	9.10963730	2.54647704		59.00000000	0.58203390	5.30211771	1.282101
60	0.28934357	9.09448240	2.63143000		60.00000000	0.57233333	5.20507543	1.303462
61	0.29947427	9.11648460	2.73015257		61.00000000	0.56295082	5.13213248	1.324837
62	0.30928123	9.08803370	2.81075824		62.00000000	0.55387097	5.03359802	1.346297
63	0.31946850	9.10640140	2.90920840		63.00000000	0.54507937	4.96371149	1.367667
64	0.32927844	9.11468410	3.00126896		64.00000000	0.53656250	4.89059769	1.389028
65	0.33941659	9.09748270	3.08783656		65.00000000	0.52830769	4.80627009	1.410400
66	0.34925702	9.10179040	3.17886419		66.00000000	0.52030303	4.73568913	1.431880
67	0.35938776	9.11792180	3.27686949		67.00000000	0.51253731	4.67327514	1.453242
68	0.36956459	9.09905340	3.36268794		68.00000000	0.50500000	4.59502197	1.474608
69	0.37939164	9.10093120	3.45281721		69.00000000	0.49768116	4.52936199	1.495991
70	0.38949257	9.09676840	3.54312370		70.00000000	0.49057143	4.46261467	1.517468
71	0.39933154	9.10643480	3.63648663		71.00000000	0.48366197	4.40443621	1.538854
72	0.40948758	9.10685540	3.72914418		72.00000000	0.47694444	4.34346409	1.560201
73	0.41928932	9.10521790	3.81772062		73.00000000	0.47041096	4.28319428	1.581568
74	0.42943564	9.09404180	3.90530566		74.00000000	0.46405405	4.22012697	1.603058
75	0.43927982	9.10280510	3.99867859		75.00000000	0.45786667	4.16787103	1.624435
76	0.44940010	9.09562020	4.08757263		76.00000000	0.45184211	4.10978418	1.645790
77	0.45955688	9.09079930	4.17773936		77.00000000	0.44597403	4.05426036	1.667165
78	0.46943527	9.09601780	4.26999157		78.00000000	0.44025641	4.00458014	1.688643
79	0.47951910	9.08929060	4.35848845		79.00000000	0.43468354	3.95096505	1.710040
80	0.48935956	9.08202740	4.44437693		80.00000000	0.42925000	3.89846026	1.731403
81	0.49949622	9.07559200	4.53322390		81.00000000	0.42395062	3.84760283	1.752766
82	0.50932103	9.04102990	4.60478666		82.00000000	0.41878049	3.78620691	1.774242
83	0.51947033	9.04411700	4.69815044		83.00000000	0.41373494	3.74186720	1.795617
84	0.52924234	9.00881860	4.76784824		84.00000000	0.40880952	3.68289084	1.816999
85	0.53939384	8.96272090	4.83443644		85.00000000	0.40400000	3.62093924	1.838362
86	0.54954171	8.92670440	4.90559640		86.00000000	0.39930233	3.56445383	1.859845
87	0.55938363	8.80516150	4.92546320		87.00000000	0.39471264	3.47550857	1.881231
88	0.56948382	8.70728680	4.95865895		88.00000000	0.39022727	3.39782078	1.902616
89	0.57930642	8.53061680	4.94184108		89.00000000	0.38584270	3.29147619	1.924107
90	0.58941853	8.30942630	4.89772983		90.00000000	0.38155556	3.17050777	1.945491
91	0.59922397	7.96901370	4.77522403		91.00000000	0.37736264	3.00720803	1.966844
92	0.60935396	7.52792790	4.58717268		92.00000000	0.37326087	2.80988091	1.988323
93	0.61915720	6.93101360	4.29138697		93.00000000	0.36924731	2.55925814	2.009827
94	0.62927675	6.12276270	3.85291221		94.00000000	0.36531915	2.23676246	2.031237
95	0.63936949	5.07699160	3.24607353		95.00000000	0.36147368	1.83519886	2.052595
96	0.64916825	3.76887700	2.44663529		96.00000000	0.35770833	1.34815871	2.073993
97	0.65931904	2.06315950	1.36028034		97.00000000	0.35402062	0.73040100	2.095475
98	0.66897869	0.06899101	0.04615351		98.00000000	0.35040816	0.02417501	2.116850
99	0.67909002	-2.44569850	-1.66084944		99.00000000	0.34686869	-0.84833623	2.138216
100	0.68879056	-5.31097030	-3.65814621		100.00000000	0.34340000	-1.82378720	2.159593
101	0.69903660	-8.81865690	-6.16456394		101.00000000	0.34000000	-2.99834335	2.181077
00:09 04/04/2018
Test Lot:	JK-PERC
Recipe:	Recipe_YJX-LID
Cell Name:	3-8-1.5h
Test Order:	3
Test Condition:	Light
1	-0.29994002	9.10874650	-2.73207761		1.00000000	34.34000000	312.79435481	0.000000
2	-0.29005688	9.10192870	-2.64007704		2.00000000	17.17000000	156.28011578	0.021528
3	-0.27996606	9.10152530	-2.54811818		3.00000000	11.44666667	104.18212627	0.042904
4	-0.27014023	9.10508820	-2.45965062		4.00000000	8.58500000	78.16718220	0.064293
5	-0.26000476	9.10117440	-2.36634867		5.00000000	6.86800000	62.50686578	0.085834
6	-0.24986260	9.10667320	-2.27541704		6.00000000	5.72333333	52.12052628	0.107231
7	-0.24002112	9.10827260	-2.18617779		7.00000000	4.90571429	44.68258301	0.128598
8	-0.22989087	9.10083390	-2.09219862		8.00000000	4.29250000	39.06532952	0.149974
9	-0.22007395	9.11020660	-2.00491915		9.00000000	3.81555556	34.76049940	0.171470
10	-0.20991839	9.10598560	-1.91151384		10.00000000	3.43400000	31.26995455	0.192848
11	-0.20008138	9.10451410	-1.82164375		11.00000000	3.12181818	28.42263765	0.214196
12	-0.18996899	9.10773470	-1.73018716		12.00000000	2.86166667	26.06330080	0.235591
13	-0.18015356	9.08823390	-1.63727769		13.00000000	2.64153846	24.00691939	0.257070
14	-0.17000471	9.10739140	-1.54829943		14.00000000	2.45285714	22.33913005	0.278450
15	-0.16021682	9.10070040	-1.45808528		15.00000000	2.28933333	20.83453678	0.299812
16	-0.15006424	9.10197070	-1.36588032		16.00000000	2.14625000	19.53510461	0.321180
17	-0.13991018	9.10317900	-1.27362741		17.00000000	2.02000000	18.38842158	0.342666
18	-0.13009177	9.10510830	-1.18449965		18.00000000	1.90777778	17.37052328	0.364043
19	-0.11994439	9.09827420	-1.09128695		19.00000000	1.80736842	16.44393348	0.385391
20	-0.11012376	9.09356590	-1.00141767		20.00000000	1.71700000	15.61365265	0.406758
21	-0.09997341	9.10726070	-0.91048391		21.00000000	1.63523810	14.89253964	0.428236
22	-0.09018255	9.09657480	-0.82035231		22.00000000	1.56090909	14.19892630	0.449624
23	-0.07998829	9.11007500	-0.72869928		23.00000000	1.49304348	13.60173807	0.470986
24	-0.07019519	9.10026360	-0.63879474		24.00000000	1.43083333	13.02096050	0.492368
25	-0.06006196	9.10416510	-0.54681401		25.00000000	1.37360000	12.50548118	0.513852
26	-0.04991831	9.09796050	-0.45415480		26.00000000	1.32076923	12.01630629	0.535246
27	-0.04008577	9.09980110	-0.36477250		27.00000000	1.27185185	11.57359888	0.556603
28	-0.02991979	9.11587430	-0.27274503		28.00000000	1.22642857	11.17996870	0.577978
29	-0.02007757	9.10706040	-0.18284762		29.00000000	1.18413793	10.78401566	0.599451
30	-0.00996518	9.10215090	-0.09070456		30.00000000	1.14466667	10.41892873	0.620829
31	-0.00066255	9.10689350	-0.00603381		31.00000000	1.10774194	10.08808783	0.642340
32	0.00945633	9.10096450	0.08606171		32.00000000	1.07312500	9.76647253	0.663699
33	0.01930273	9.10698220	0.17578965		33.00000000	1.04060606	9.47678087	0.685170
34	0.02941409	9.10569190	0.26783565		34.00000000	1.01000000	9.19674882	0.706577
35	0.03926124	9.09739300	0.35717494		35.00000000	0.98114286	8.92584216	0.727967
36	0.04941576	9.09933850	0.44965075		36.00000000	0.95388889	8.67975789	0.749381
37	0.05923389	9.10907650	0.53956603		37.00000000	0.92810811	8.45420776	0.770839
38	0.06936608	9.10599610	0.63164728		38.00000000	0.90368421	8.22894490	0.792206
39	0.07954666	9.09737590	0.72366587		39.00000000	0.88051282	8.01035611	0.813556
40	0.08934096	9.10560890	0.81350386		40.00000000	0.85850000	7.81716524	0.834932
41	0.09952005	9.09750460	0.90538411		41.00000000	0.83756098	7.61971483	0.856424
42	0.10930692	9.10714240	0.99547369		42.00000000	0.81761905	7.44617310	0.877808
43	0.11947781	9.10399630	1.08772554		43.00000000	0.79860465	7.27049379	0.899183
44	0.12930487	9.10757830	1.17765423		44.00000000	0.78045455	7.10805088	0.920546
45	0.13943408	9.10370450	1.26936666		45.00000000	0.76311111	6.94713806	0.942029
46	0.14928719	9.10114290	1.35868405		46.00000000	0.74652174	6.79420103	0.963424
47	0.15938962	9.10106750	1.45061569		47.00000000	0.73063830	6.64958847	0.984805
48	0.16953595	9.10538670	1.54369038		48.00000000	0.71541667	6.51414540	1.006149
49	0.17934068	9.10096260	1.63217282		49.00000000	0.70081633	6.37810318	1.027631
50	0.18949297	9.10539150	1.72540768		50.00000000	0.68680000	6.25358288	1.049007
51	0.19926569	9.10193250	1.81370286		51.00000000	0.67333333	6.12863455	1.070397
52	0.20943809	9.10118480	1.90613476		52.00000000	0.66038462	6.01028242	1.091882
53	0.21924654	9.09577080	1.99421628		53.00000000	0.64792453	5.89337301	1.113264
54	0.22940627	9.09964280	2.08751511		54.00000000	0.63592593	5.78669877	1.134624
55	0.23923704	9.09368610	2.17554655		55.00000000	0.62436364	5.67776692	1.155997
56	0.24935956	9.09970090	2.26909741		56.00000000	0.61321429	5.58006659	1.177464
57	0.25950962	9.09956070	2.36142354		57.00000000	0.60245614	5.48208622	1.198857
58	0.26936719	9.10058690	2.45139952		58.00000000	0.59206897	5.38817507	1.220207
59	0.27948302	9.10751440	2.54539563		59.00000000	0.58203390	5.30088211	1.241584
60	0.28928998	9.10803510	2.63486329		60.00000000	0.57233333	5.21283209	1.263065
61	0.29947948	9.10066030	2.72546101		61.00000000	0.56295082	5.12322418	1.284444
62	0.30929387	9.10073090	2.81480028		62.00000000	0.55387097	5.04063063	1.305779
63	0.31943724	9.10055730	2.90705691		63.00000000	0.54507937	4.96052599	1.327152
64	0.32925832	9.09084420	2.99323609		64.00000000	0.53656250	4.87780609	1.348637
65	0.33940989	9.09786030	3.08790376		65.00000000	0.52830769	4.80646958	1.370024
66	0.34923023	9.09659480	3.17680589		66.00000000	0.52030303	4.73298584	1.391368
67	0.35935575	9.09511660	3.26838245		67.00000000	0.51253731	4.66158663	1.412739
68	0.36951175	9.09923360	3.36227373		68.00000000	0.50500000	4.59511297	1.434211
69	0.37934327	9.10182570	3.45271632		69.00000000	0.49768116	4.52980717	1.455615
70	0.38947994	9.10000800	3.54427057		70.00000000	0.49057143	4.46420392	1.476966
71	0.39930996	9.09367660	3.63119564		71.00000000	0.48366197	4.39826556	1.498349
72	0.40947491	9.09611610	3.72463132		72.00000000	0.47694444	4.33834204	1.519836
73	0.41929156	9.09747120	3.81449289		73.00000000	0.47041096	4.27955015	1.541219
74	0.42945501	9.09772300	3.90706272		74.00000000	0.46405405	4.22183524	1.562591
75	0.43926269	9.09548190	3.99530585		75.00000000	0.45786667	4.16451798	1.583959
76	0.44944254	9.09986590	4.08986684		76.00000000	0.45184211	4.11170257	1.605430
77	0.45953158	9.09337620	4.17869353		77.00000000	0.44597403	4.05540959	1.626806
78	0.46938542	9.09297180	4.26810839		78.00000000	0.44025641	4.00323912	1.648179
79	0.47956747	9.07362650	4.35141610		79.00000000	0.43468354	3.94415613	1.669539
80	0.48936698	9.09043500	4.44855872		80.00000000	0.42925000	3.90206922	1.691012
81	0.49949250	9.05949400	4.52514931		81.00000000	0.42395062	3.84077807	1.712398
82	0.50931805	9.05655000	4.61266439		82.00000000	0.41878049	3.79270643	1.733786
83	0.51946217	9.02648540	4.68891769		83.00000000	0.41373494	3.73457239	1.755261
84	0.52924979	9.00126550	4.76391788		84.00000000	0.40880952	3.67980306	1.776640
85	0.53938270	8.97844790	4.84281947		85.00000000	0.40400000	3.62729295	1.797998
86	0.54952383	8.91595840	4.89953161		86.00000000	0.39930233	3.56016292	1.819380
87	0.55934644	8.83319380	4.94081551		87.00000000	0.39471264	3.48657328	1.840859
88	0.56947565	8.68710990	4.94709756		88.00000000	0.39022727	3.38994720	1.862245
89	0.57928038	8.54697230	4.95109336		89.00000000	0.38584270	3.29778684	1.883582
90	0.58942372	8.31618400	4.90175611		90.00000000	0.38155556	3.17308621	1.904951
91	0.59920686	7.99059060	4.78801670		91.00000000	0.37736264	3.01535034	1.926427
92	0.60934949	7.56827070	4.61172189		92.00000000	0.37326087	2.82493930	1.947800
93	0.61914754	6.96826790	4.31438593		93.00000000	0.36924731	2.57301419	1.969160
94	0.62924325	6.16784520	3.88107496		94.00000000	0.36531915	2.25323196	1.990751
95	0.63937247	5.10770560	3.26572635		95.00000000	0.36147368	1.84630116	2.012264
96	0.64917052	3.80192970	2.46810068		96.00000000	0.35770833	1.35998194	2.033675
97	0.65925658	2.09860900	1.38352179		97.00000000	0.35402062	0.74295086	2.055024
98	0.66899502	0.06082629	0.04069249		98.00000000	0.35040816	0.02131403	2.076398
99	0.67910045	-2.45852710	-1.66958686		99.00000000	0.34686869	-0.85278607	2.097906
100	0.68877792	-5.38746980	-3.71077024		100.00000000	0.34340000	-1.85005713	2.119291
101	0.69907755	-8.95568750	-6.26072008		101.00000000	0.34000000	-3.04493375	2.140634
00:09 04/04/2018
Test Lot:	JK-PERC
Recipe:	Recipe_YJX-LID
Cell Name:	3-8-1.5h
Test Order:	4
Test Condition:	Light
1	-0.29994094	9.08950140	-2.72631359		1.00000000	34.34000000	312.13347808	0.000000
2	-0.29008386	9.09959130	-2.63964457		2.00000000	17.17000000	156.23998262	0.061874
3	-0.27996331	9.10771370	-2.54982567		3.00000000	11.44666667	104.25296282	0.083301
4	-0.27015758	9.10143380	-2.45882133		4.00000000	8.58500000	78.13580917	0.104801
5	-0.25999460	9.11732200	-2.37045449		5.00000000	6.86800000	62.61776750	0.126231
6	-0.24982193	9.10154060	-2.27376444		6.00000000	5.72333333	52.09115070	0.147629
7	-0.24002811	9.10227010	-2.18480069		7.00000000	4.90571429	44.65313646	0.168974
8	-0.22990160	9.10206790	-2.09257997		8.00000000	4.29250000	39.07062646	0.190446
9	-0.22008024	9.10565660	-2.00397509		9.00000000	3.81555556	34.74313863	0.211823
10	-0.20992395	9.10805610	-1.91199911		10.00000000	3.43400000	31.27706465	0.233199
11	-0.20009069	9.11224170	-1.82327473		11.00000000	3.12181818	28.44676182	0.254675
12	-0.18995152	9.09863000	-1.72829860		12.00000000	2.86166667	26.03724618	0.276120
13	-0.18013313	9.10923580	-1.64087516		13.00000000	2.64153846	24.06239672	0.297485
14	-0.16998653	9.10321140	-1.54742332		14.00000000	2.45285714	22.32887711	0.318875
15	-0.16018303	9.09322830	-1.45658086		15.00000000	2.28933333	20.81743065	0.340221
16	-0.15003939	9.10826110	-1.36659794		16.00000000	2.14625000	19.54860539	0.361735
17	-0.13986972	9.10633560	-1.27370061		17.00000000	2.02000000	18.39479791	0.383120
18	-0.13006622	9.11246870	-1.18522436		18.00000000	1.90777778	17.38456529	0.404521
19	-0.11991440	9.09565830	-1.09070041		19.00000000	1.80736842	16.43920558	0.425873
20	-0.11009527	9.11272720	-1.00326816		20.00000000	1.71700000	15.64655260	0.447345
21	-0.09995164	9.09898570	-0.90945854		21.00000000	1.63523810	14.87900804	0.468726
22	-0.09009901	9.10784440	-0.82060780		22.00000000	1.56090909	14.21651712	0.490116
23	-0.07995538	9.09428600	-0.72713713		23.00000000	1.49304348	13.57816440	0.511464
24	-0.07014221	9.09937100	-0.63824999		24.00000000	1.43083333	13.01968334	0.532944
25	-0.05997849	9.10718150	-0.54623495		25.00000000	1.37360000	12.50962451	0.554331
26	-0.04983858	9.09885220	-0.45347384		26.00000000	1.32076923	12.01748402	0.575718
27	-0.04002391	9.09997560	-0.36421662		27.00000000	1.27185185	11.57382082	0.597189
28	-0.02984828	9.09993170	-0.27161730		28.00000000	1.22642857	11.16041623	0.618568
29	-0.02005073	9.10467340	-0.18255537		29.00000000	1.18413793	10.78118912	0.639915
30	-0.00988329	9.10979650	-0.09003473		30.00000000	1.14466667	10.42768039	0.661284
31	-0.00063129	9.10021210	-0.00574486		31.00000000	1.10774194	10.08068656	0.682888
32	0.00952702	9.09608550	0.08665857		32.00000000	1.07312500	9.76123675	0.704263
33	0.01932726	9.10295100	0.17593511		33.00000000	1.04060606	9.47258598	0.725597
34	0.02949368	9.09573170	0.26826655		34.00000000	1.01000000	9.18668902	0.746983
35	0.03929020	9.09873870	0.35749124		35.00000000	0.98114286	8.92716248	0.768458
36	0.04941344	9.09552480	0.44944120		36.00000000	0.95388889	8.67612005	0.789851
37	0.05923750	9.10157780	0.53915474		37.00000000	0.92810811	8.44724815	0.811197
38	0.06938010	9.10530090	0.63172666		38.00000000	0.90368421	8.22831666	0.832560
39	0.07952046	9.10176470	0.72377655		39.00000000	0.88051282	8.01422051	0.854032
40	0.08935197	9.09337140	0.81251062		40.00000000	0.85850000	7.80665935	0.875417
41	0.09952582	9.11057280	0.90673727		41.00000000	0.83756098	7.63066024	0.896759
42	0.10932011	9.09513760	0.99428144		42.00000000	0.81761905	7.43635774	0.918136
43	0.11944038	9.10588840	1.08761077		43.00000000	0.79860465	7.27200483	0.939611
44	0.12930240	9.10259530	1.17698742		44.00000000	0.78045455	7.10416188	0.960979
45	0.13943532	9.11052420	1.27032886		45.00000000	0.76311111	6.95234225	0.982340
46	0.14927426	9.11557100	1.36072012		46.00000000	0.74652174	6.80497192	1.003720
47	0.15938710	9.09640220	1.44984917		47.00000000	0.73063830	6.64617982	1.025201
48	0.16954085	9.11045070	1.54459356		48.00000000	0.71541667	6.51776827	1.046587
49	0.17937459	9.09637260	1.63165811		49.00000000	0.70081633	6.37488643	1.067946
50	0.18950453	9.09381870	1.72331984		50.00000000	0.68680000	6.24563468	1.089318
51	0.19930477	9.10783770	1.81523550		51.00000000	0.67333333	6.13261072	1.110788
52	0.20945109	9.09117220	1.90415593		52.00000000	0.66038462	6.00367026	1.132163
53	0.21926771	9.11004540	1.99753879		53.00000000	0.64792453	5.90262187	1.153550
54	0.22944380	9.10035610	2.08802028		54.00000000	0.63592593	5.78715238	1.174910
55	0.23926264	9.10007190	2.17730723		55.00000000	0.62436364	5.68175398	1.196385
56	0.24937846	9.10020070	2.26939404		56.00000000	0.61321429	5.58037307	1.217771
57	0.25952923	9.10640720	2.36337885		57.00000000	0.60245614	5.48621093	1.239144
58	0.26938754	9.10002230	2.45143262		58.00000000	0.59206897	5.38784079	1.260622
59	0.27950704	9.10169600	2.54398811		59.00000000	0.58203390	5.29749560	1.282019
60	0.28935418	9.10879230	2.63566713		60.00000000	0.57233333	5.21326546	1.303371
61	0.29948637	9.10586640	2.72708287		61.00000000	0.56295082	5.12615495	1.324745
62	0.30927023	9.10359670	2.81547145		62.00000000	0.55387097	5.04221791	1.346230
63	0.31945822	9.10790060	2.90959371		63.00000000	0.54507937	4.96452868	1.367616
64	0.32927856	9.10217190	2.99715006		64.00000000	0.53656250	4.88388411	1.388978
65	0.33941817	9.10169410	3.08928036		65.00000000	0.52830769	4.80849501	1.410350
66	0.34924448	9.09841820	3.17757233		66.00000000	0.52030303	4.73393456	1.431830
67	0.35939676	9.10947130	3.27391447		67.00000000	0.51253731	4.66894395	1.453213
68	0.36954531	9.10428620	3.36444627		68.00000000	0.50500000	4.59766453	1.474567
69	0.37937531	9.09579850	3.45072138		69.00000000	0.49768116	4.52680754	1.495952
70	0.38951865	9.10821630	3.54782012		70.00000000	0.49057143	4.46823068	1.517425
71	0.39933676	9.10308930	3.63519819		71.00000000	0.48366197	4.40281812	1.538810
72	0.40949500	9.09896090	3.72597899		72.00000000	0.47694444	4.33969885	1.560155
73	0.41930416	9.09499550	3.81356945		73.00000000	0.47041096	4.27838555	1.581538
74	0.42947429	9.10138230	3.90880970		74.00000000	0.46405405	4.22353335	1.603010
75	0.43924776	9.09382530	3.99444239		75.00000000	0.45786667	4.16375948	1.624384
76	0.44944468	9.09737210	4.08876549		76.00000000	0.45184211	4.11057576	1.645743
77	0.45957834	9.09263900	4.17877994		77.00000000	0.44597403	4.05508082	1.667122
78	0.46943590	9.07484050	4.26005592		78.00000000	0.44025641	3.99525670	1.688595
79	0.47957775	9.08994670	4.35933619		79.00000000	0.43468354	3.95125025	1.709977
80	0.48938915	9.07444000	4.44093248		80.00000000	0.42925000	3.89520337	1.731333
81	0.49952802	9.05283930	4.52214689		81.00000000	0.42395062	3.83795681	1.752706
82	0.50932455	9.06654740	4.61781517		82.00000000	0.41878049	3.79689314	1.774179
83	0.51949692	9.01901630	4.68535119		83.00000000	0.41373494	3.73148217	1.795556
84	0.52928454	9.01164440	4.76972406		84.00000000	0.40880952	3.68404606	1.816951
85	0.53942937	8.95192530	4.82893142		85.00000000	0.40400000	3.61657782	1.838292
86	0.54957491	8.91029170	4.89687276		86.00000000	0.39930233	3.55790020	1.859764
87	0.55938262	8.80943970	4.92784746		87.00000000	0.39471264	3.47719723	1.881159
88	0.56950587	8.69966320	4.95450926		88.00000000	0.39022727	3.39484584	1.902542
89	0.57931352	8.52783010	4.94028727		89.00000000	0.38584270	3.29040096	1.924023
90	0.58945763	8.28571320	4.88407687		90.00000000	0.38155556	3.16145990	1.945399
91	0.59926230	7.97144410	4.77698593		91.00000000	0.37736264	3.00812517	1.966750
92	0.60936773	7.51428750	4.57896432		92.00000000	0.37326087	2.80478949	1.988269
93	0.61918658	6.93457130	4.29379349		93.00000000	0.36924731	2.56057181	2.009772
94	0.62926739	6.12141040	3.85200395		94.00000000	0.36531915	2.23626844	2.031195
95	0.63942862	5.06984140	3.24180169		95.00000000	0.36147368	1.83261425	2.052578
96	0.64919013	3.74326750	2.43009231		96.00000000	0.35770833	1.33899798	2.073971
97	0.65932083	2.06282970	1.36006659		97.00000000	0.35402062	0.73028425	2.095459
98	0.66902429	0.04820196	0.03224828		98.00000000	0.35040816	0.01689036	2.116858
99	0.67912298	-2.43761750	-1.65544206		99.00000000	0.34686869	-0.84553318	2.138207
100	0.68879598	-5.30460790	-3.65379260		100.00000000	0.34340000	-1.82160235	2.159574
101	0.69907922	-8.76511860	-6.12751227		101.00000000	0.34000000	-2.98014032	2.181072
