# Supplementary material for: Study on the Electrical Injection Regeneration of Industrialized B-Doped Czochralski Silicon PERC Solar Cells
Source: Hindawi journal article supplement (doi:10.1155/2019/5357370), 2019-06-20
Supplement: f1 [file 5357370.f1.zip › section3.3/IVRawData_3-8-2.5.csv]

00:48 04/04/2018
Test Lot:	JK-PERC
Recipe:	Recipe_YJX-LID
Cell Name:	3-8-2.5
Test Order:	2
Test Condition:	Light
1	-0.29990649	9.10882570	-2.73179594		1.00000000	34.34000000	312.79707454	0.000000
2	-0.29008803	9.11508370	-2.64417667		2.00000000	17.17000000	156.50598713	0.061790
3	-0.27996662	9.09639930	-2.54668817		3.00000000	11.44666667	104.12345065	0.083214
4	-0.27012581	9.10007760	-2.45816583		4.00000000	8.58500000	78.12416620	0.104722
5	-0.25995976	9.09564110	-2.36450068		5.00000000	6.86800000	62.46886307	0.126098
6	-0.24980488	9.10815140	-2.27526067		6.00000000	5.72333333	52.12898651	0.147502
7	-0.23999088	9.09286120	-2.18220376		7.00000000	4.90571429	44.60697909	0.168882
8	-0.22984417	9.09715180	-2.09092730		8.00000000	4.29250000	39.04952410	0.190361
9	-0.22000039	9.10417270	-2.00292154		9.00000000	3.81555556	34.73747672	0.211743
10	-0.20986933	9.09172820	-1.90807491		10.00000000	3.43400000	31.22099464	0.233088
11	-0.20003894	9.10790440	-1.82193554		11.00000000	3.12181818	28.43322155	0.254462
12	-0.18991606	9.09313960	-1.72693325		12.00000000	2.86166667	26.02153449	0.275954
13	-0.18013257	9.10241220	-1.63964090		13.00000000	2.64153846	24.04437192	0.297331
14	-0.16998586	9.08528140	-1.54436937		14.00000000	2.45285714	22.28489738	0.318703
15	-0.16019195	9.10239030	-1.45812965		15.00000000	2.28933333	20.83840553	0.340073
16	-0.15002218	9.10454650	-1.36588391		16.00000000	2.14625000	19.54063293	0.361544
17	-0.13985910	9.09536740	-1.27206990		17.00000000	2.02000000	18.37264215	0.382932
18	-0.13005328	9.11579510	-1.18553905		18.00000000	1.90777778	17.39091132	0.404292
19	-0.11990584	9.09503360	-1.09054764		19.00000000	1.80736842	16.43807652	0.425651
20	-0.11008066	9.09455490	-1.00113461		20.00000000	1.71700000	15.61535076	0.447127
21	-0.09993173	9.10069850	-0.90944856		21.00000000	1.63523810	14.88180888	0.468499
22	-0.09015493	9.10229020	-0.82061634		22.00000000	1.56090909	14.20784752	0.489882
23	-0.07999558	9.09189510	-0.72731142		23.00000000	1.49304348	13.57459468	0.511240
24	-0.07014957	9.10180950	-0.63848803		24.00000000	1.43083333	13.02317243	0.532711
25	-0.06001627	9.09740350	-0.54599220		25.00000000	1.37360000	12.49619345	0.554092
26	-0.04984277	9.08998200	-0.45306989		26.00000000	1.32076923	12.00576853	0.575471
27	-0.04004439	9.09908100	-0.36436718		27.00000000	1.27185185	11.57268302	0.596948
28	-0.02985080	9.09671780	-0.27154433		28.00000000	1.22642857	11.15647462	0.618337
29	-0.02004424	9.09340380	-0.18227034		29.00000000	1.18413793	10.76784436	0.639691
30	-0.00987893	9.09927270	-0.08989108		30.00000000	1.14466667	10.41563415	0.661051
31	-0.00064620	9.09649750	-0.00587816		31.00000000	1.10774194	10.07657175	0.682657
32	0.00950997	9.10827350	0.08661938		32.00000000	1.07312500	9.77431600	0.704096
33	0.01932370	9.10666940	0.17597450		33.00000000	1.04060606	9.47645537	0.725466
34	0.02944257	9.09176450	0.26768490		34.00000000	1.01000000	9.18268215	0.746856
35	0.03929053	9.08377270	0.35690626		35.00000000	0.98114286	8.91247870	0.768330
36	0.04944811	9.11894230	0.45091446		36.00000000	0.95388889	8.69845774	0.789715
37	0.05922760	9.09220220	0.53850932		37.00000000	0.92810811	8.43854658	0.811064
38	0.06941792	9.10019110	0.63171637		38.00000000	0.90368421	8.22369901	0.832436
39	0.07954945	9.10694120	0.72445214		39.00000000	0.88051282	8.01877848	0.853910
40	0.08936839	9.09292320	0.81261989		40.00000000	0.85850000	7.80627457	0.875288
41	0.09948577	9.11037920	0.90635309		41.00000000	0.83756098	7.63049809	0.896637
42	0.10929652	9.08675480	0.99315068		42.00000000	0.81761905	7.42950381	0.918016
43	0.11948238	9.10575490	1.08797727		43.00000000	0.79860465	7.27189822	0.939498
44	0.12925965	9.09850690	1.17606982		44.00000000	0.78045455	7.10097107	0.960875
45	0.13945666	9.11657240	1.27136674		45.00000000	0.76311111	6.95695769	0.982238
46	0.14925328	9.09069350	1.35681582		46.00000000	0.74652174	6.78640032	1.003612
47	0.15940043	9.10206320	1.45087279		47.00000000	0.73063830	6.65031596	1.025089
48	0.16956618	9.09977340	1.54301381		48.00000000	0.71541667	6.51012955	1.046473
49	0.17938215	9.10790440	1.63379547		49.00000000	0.70081633	6.38296810	1.067855
50	0.18951443	9.10248570	1.72505239		50.00000000	0.68680000	6.25158718	1.089214
51	0.19931772	9.08819960	1.81143922		51.00000000	0.67333333	6.11938773	1.110699
52	0.20945446	9.09665580	1.90533513		52.00000000	0.66038462	6.00729154	1.132092
53	0.21927191	9.09455010	1.99417937		53.00000000	0.64792453	5.89258208	1.153476
54	0.22942801	9.09697340	2.08710050		54.00000000	0.63592593	5.78500123	1.174828
55	0.23923577	9.10172940	2.17745924		55.00000000	0.62436364	5.68278887	1.196292
56	0.24938069	9.09545420	2.26823064		56.00000000	0.61321429	5.57746245	1.217666
57	0.25952190	9.11128520	2.36457805		57.00000000	0.60245614	5.48914972	1.239054
58	0.26936167	9.08333680	2.44670277		58.00000000	0.59206897	5.37796182	1.260524
59	0.27951106	9.10702510	2.54551424		59.00000000	0.58203390	5.30059732	1.281928
60	0.28933597	9.09724330	2.63215971		60.00000000	0.57233333	5.20665558	1.303279
61	0.29948536	9.10605050	2.72712881		61.00000000	0.56295082	5.12625859	1.324654
62	0.30933109	9.09965320	2.81480564		62.00000000	0.55387097	5.04003372	1.346144
63	0.31946781	9.10536100	2.90886974		63.00000000	0.54507937	4.96314439	1.367521
64	0.32929122	9.09337520	2.99436861		64.00000000	0.53656250	4.87916413	1.388877
65	0.33943242	9.10172650	3.08942105		65.00000000	0.52830769	4.80851212	1.410260
66	0.34926921	9.09617520	3.17701393		66.00000000	0.52030303	4.73276752	1.431742
67	0.35940596	9.08902450	3.26664958		67.00000000	0.51253731	4.65846420	1.453118
68	0.36956054	9.09759710	3.36211290		68.00000000	0.50500000	4.59428654	1.474463
69	0.37933111	9.08724210	3.44707363		69.00000000	0.49768116	4.52254918	1.495841
70	0.38952070	9.10146430	3.54520875		70.00000000	0.49057143	4.46491834	1.517312
71	0.39933965	9.09258560	3.63102995		71.00000000	0.48366197	4.39773788	1.538692
72	0.40945703	9.07641790	3.71640312		72.00000000	0.47694444	4.32894709	1.560035
73	0.41932285	9.09917450	3.81549178		73.00000000	0.47041096	4.28035140	1.581413
74	0.42943650	9.08499240	3.90142734		74.00000000	0.46405405	4.21592755	1.602894
75	0.43925545	9.08755590	3.99175846		75.00000000	0.45786667	4.16088893	1.624258
76	0.44940707	9.10245040	4.09070556		76.00000000	0.45184211	4.11287035	1.645622
77	0.45956761	9.07332520	4.16980638		77.00000000	0.44597403	4.04646737	1.666999
78	0.46942079	9.08434300	4.26437947		78.00000000	0.44025641	3.99944024	1.688468
79	0.47956944	9.07638930	4.35275893		79.00000000	0.43468354	3.94535707	1.709852
80	0.48937646	9.05447010	4.43104452		80.00000000	0.42925000	3.88663129	1.731210
81	0.49949533	9.05985260	4.52535406		81.00000000	0.42395062	3.84093010	1.752576
82	0.50933290	9.03672500	4.60270135		82.00000000	0.41878049	3.78440410	1.774046
83	0.51944506	9.00535490	4.67778712		83.00000000	0.41373494	3.72582997	1.795414
84	0.52922308	8.99849130	4.76220928		84.00000000	0.40880952	3.67866894	1.816807
85	0.53937989	8.94089320	4.82253799		85.00000000	0.40400000	3.61212085	1.838147
86	0.54953223	8.87159630	4.87522810		86.00000000	0.39930233	3.54244903	1.859617
87	0.55937356	8.81364150	4.93011802		87.00000000	0.39471264	3.47885574	1.881023
88	0.56949240	8.67458250	4.94010881		88.00000000	0.39022727	3.38505867	1.902406
89	0.57929122	8.50951190	4.92948553		89.00000000	0.38584270	3.28333302	1.923881
90	0.58943170	8.26517490	4.87175609		90.00000000	0.38155556	3.15362340	1.945262
91	0.59920299	7.94280390	4.75935185		91.00000000	0.37736264	2.99731743	1.966600
92	0.60935241	7.49485490	4.56700790		92.00000000	0.37326087	2.79753606	1.988083
93	0.61916983	6.88775250	4.26468854		93.00000000	0.36924731	2.54328410	2.009608
94	0.62924999	6.08731080	3.83044026		94.00000000	0.36531915	2.22381120	2.030986
95	0.63937634	5.01623960	3.20726492		95.00000000	0.36147368	1.81323861	2.052325
96	0.64917147	3.71088500	2.40900067		96.00000000	0.35770833	1.32741449	2.073711
97	0.65923077	1.99937120	1.31804702		97.00000000	0.35402062	0.70781863	2.095194
98	0.66897231	-0.01932042	-0.01292483		98.00000000	0.35040816	-0.00677003	2.116580
99	0.67907709	-2.54167030	-1.72599007		99.00000000	0.34686869	-0.88162584	2.137990
100	0.68878436	-5.44306950	-3.74910114		100.00000000	0.34340000	-1.86915007	2.159373
101	0.69903272	-8.94992070	-6.25628741		101.00000000	0.34000000	-3.04297304	2.180861
00:48 04/04/2018
Test Lot:	JK-PERC
Recipe:	Recipe_YJX-LID
Cell Name:	3-8-2.5
Test Order:	3
Test Condition:	Light
1	-0.29991502	9.10193630	-2.72980741		1.00000000	34.34000000	312.56049254	0.000000
2	-0.29012653	9.09161950	-2.63772002		2.00000000	17.17000000	156.10310682	0.061804
3	-0.27997705	9.11270240	-2.55134754		3.00000000	11.44666667	104.31006681	0.083227
4	-0.27013052	9.08877850	-2.45515646		4.00000000	8.58500000	78.02716342	0.104716
5	-0.26001230	9.09003730	-2.36352151		5.00000000	6.86800000	62.43037618	0.126099
6	-0.24983828	9.10225200	-2.27409098		6.00000000	5.72333333	52.09522228	0.147470
7	-0.24005350	9.09757040	-2.18390362		7.00000000	4.90571429	44.63008108	0.168883
8	-0.22987948	9.10087300	-2.09210395		8.00000000	4.29250000	39.06549735	0.190368
9	-0.22006643	9.09928320	-2.00244677		9.00000000	3.81555556	34.71882057	0.211752
10	-0.20989761	9.10818670	-1.91178662		10.00000000	3.43400000	31.27751313	0.233157
11	-0.20008530	9.09192280	-1.81916010		11.00000000	3.12181818	28.38332990	0.254541
12	-0.18993211	9.10336970	-1.72902222		12.00000000	2.86166667	26.05080962	0.276033
13	-0.18018009	9.08450790	-1.63684745		13.00000000	2.64153846	23.99707702	0.297415
14	-0.16998224	9.09669970	-1.54627739		14.00000000	2.45285714	22.31290484	0.318758
15	-0.16017142	9.09766100	-1.45718528		15.00000000	2.28933333	20.82757858	0.340141
16	-0.15003759	9.09736730	-1.36494707		16.00000000	2.14625000	19.52522457	0.361625
17	-0.13984941	9.09709170	-1.27222291		17.00000000	2.02000000	18.37612523	0.383018
18	-0.13005124	9.09198280	-1.18242364		18.00000000	1.90777778	17.34548274	0.404393
19	-0.11989731	9.10083010	-1.09116505		19.00000000	1.80736842	16.44855293	0.425758
20	-0.11006937	9.09485530	-1.00106499		20.00000000	1.71700000	15.61586655	0.447229
21	-0.09991544	9.08223530	-0.90745551		21.00000000	1.63523810	14.85161715	0.468603
22	-0.09009940	9.08590700	-0.81863479		22.00000000	1.56090909	14.18227484	0.489981
23	-0.07993506	9.10655400	-0.72793293		23.00000000	1.49304348	13.59648106	0.511332
24	-0.07014656	9.09543130	-0.63801323		24.00000000	1.43083333	13.01404629	0.532806
25	-0.05998147	9.09649750	-0.54562125		25.00000000	1.37360000	12.49494897	0.554178
26	-0.04980223	9.09012220	-0.45270838		26.00000000	1.32076923	12.00595371	0.575582
27	-0.04002266	9.08709140	-0.36368961		27.00000000	1.27185185	11.55743403	0.597042
28	-0.02987544	9.10195160	-0.27192476		28.00000000	1.22642857	11.16289350	0.618416
29	-0.02005791	9.09467510	-0.18242018		29.00000000	1.18413793	10.76934976	0.639774
30	-0.00993077	9.08697320	-0.09024068		30.00000000	1.14466667	10.40155532	0.661155
31	-0.00069601	9.09618380	-0.00633100		31.00000000	1.10774194	10.07622425	0.682742
32	0.00945697	9.10345650	0.08609114		32.00000000	1.07312500	9.76914676	0.704106
33	0.01931515	9.09797760	0.17572880		33.00000000	1.04060606	9.46741063	0.725457
34	0.02944572	9.10026930	0.26796395		34.00000000	1.01000000	9.19127199	0.746831
35	0.03924064	9.10192490	0.35716532		35.00000000	0.98114286	8.93028860	0.768312
36	0.04937790	9.09652230	0.44916717		36.00000000	0.95388889	8.67707155	0.789697
37	0.05924278	9.10110000	0.53917445		37.00000000	0.92810811	8.44680470	0.811064
38	0.06936292	9.09250350	0.63068263		38.00000000	0.90368421	8.21675185	0.832444
39	0.07951657	9.10554120	0.72404138		39.00000000	0.88051282	8.01754576	0.853919
40	0.08930851	9.09376050	0.81215018		40.00000000	0.85850000	7.80699339	0.875294
41	0.09946438	9.10097690	0.90522302		41.00000000	0.83756098	7.62262309	0.896638
42	0.10930321	9.09429930	0.99403611		42.00000000	0.81761905	7.43567233	0.918012
43	0.11946280	9.09656430	1.08670104		43.00000000	0.79860465	7.26455856	0.939502
44	0.12930311	9.09041600	1.17541906		44.00000000	0.78045455	7.09465649	0.960875
45	0.13941285	9.09853360	1.26845250		45.00000000	0.76311111	6.94319208	0.982233
46	0.14923976	9.08668610	1.35609485		46.00000000	0.74652174	6.78340871	1.003611
47	0.15943508	9.09855370	1.45062864		47.00000000	0.73063830	6.64775179	1.025087
48	0.16956192	9.10618020	1.54406140		48.00000000	0.71541667	6.51471308	1.046495
49	0.17934643	9.08884240	1.63005144		49.00000000	0.70081633	6.36960914	1.067863
50	0.18948443	9.08934780	1.72228989		50.00000000	0.68680000	6.24256407	1.089227
51	0.19932029	9.10428430	1.81466859		51.00000000	0.67333333	6.13021810	1.110696
52	0.20943522	9.08575820	1.90287777		52.00000000	0.66038462	6.00009493	1.132068
53	0.21928075	9.10178950	1.99584723		53.00000000	0.64792453	5.89727267	1.153449
54	0.22942546	9.10192300	2.08821287		54.00000000	0.63592593	5.78814881	1.174805
55	0.23927693	9.09895420	2.17716983		55.00000000	0.62436364	5.68105613	1.196280
56	0.24942835	9.09528730	2.26862250		56.00000000	0.61321429	5.57736011	1.217653
57	0.25956190	9.09801100	2.36149702		57.00000000	0.60245614	5.48115259	1.239042
58	0.26937839	9.09699150	2.45053292		58.00000000	0.59206897	5.38604635	1.260529
59	0.27948439	9.09420590	2.54168859		59.00000000	0.58203390	5.29313611	1.281928
60	0.28935969	9.10638900	2.63502190		60.00000000	0.57233333	5.21188997	1.303267
61	0.29947686	9.08841510	2.72177002		61.00000000	0.56295082	5.11633073	1.324642
62	0.30933654	9.10604670	2.81683298		62.00000000	0.55387097	5.04357490	1.346122
63	0.31943434	9.08310990	2.90145722		63.00000000	0.54507937	4.95101578	1.367499
64	0.32927170	9.09042070	2.99321828		64.00000000	0.53656250	4.87757886	1.388838
65	0.33940673	9.09436990	3.08669035		65.00000000	0.52830769	4.80462557	1.410211
66	0.34922174	9.08309940	3.17201578		66.00000000	0.52030303	4.72596414	1.431692
67	0.35934785	9.09593200	3.26860361		67.00000000	0.51253731	4.66200455	1.453070
68	0.36954391	9.09330840	3.36037674		68.00000000	0.50500000	4.59212074	1.474437
69	0.37935966	9.09069820	3.44864418		69.00000000	0.49768116	4.52426922	1.495804
70	0.38947758	9.09012700	3.54040067		70.00000000	0.49057143	4.45935659	1.517279
71	0.39932236	9.08929630	3.62955925		71.00000000	0.48366197	4.39614697	1.538662
72	0.40946484	9.09113500	3.72250014		72.00000000	0.47694444	4.33596633	1.560007
73	0.41929695	9.07884690	3.80673281		73.00000000	0.47041096	4.27078908	1.581383
74	0.42943794	9.10181810	3.90866602		74.00000000	0.46405405	4.22373559	1.602857
75	0.43925592	9.07933810	3.98815301		75.00000000	0.45786667	4.15712627	1.624237
76	0.44943264	9.08968640	4.08520176		76.00000000	0.45184211	4.10710304	1.645597
77	0.45956692	9.07535740	4.17073405		77.00000000	0.44597403	4.04737368	1.666978
78	0.46941021	9.08958820	4.26674551		78.00000000	0.44025641	4.00174947	1.688464
79	0.47955197	9.06972030	4.34940224		79.00000000	0.43468354	3.94245817	1.709835
80	0.48937365	9.05939770	4.43343052		80.00000000	0.42925000	3.88874646	1.731196
81	0.49952433	9.05843830	4.52491032		81.00000000	0.42395062	3.84033051	1.752556
82	0.50934827	9.05667400	4.61300123		82.00000000	0.41878049	3.79275836	1.774033
83	0.51950490	9.00219150	4.67668259		83.00000000	0.41373494	3.72452116	1.795424
84	0.52926707	8.98773000	4.75690952		84.00000000	0.40880952	3.67426962	1.816804
85	0.53940356	8.94202230	4.82335866		85.00000000	0.40400000	3.61257701	1.838155
86	0.54954827	8.87356950	4.87645477		86.00000000	0.39930233	3.54323694	1.859640
87	0.55935436	8.78887750	4.91609695		87.00000000	0.39471264	3.46908107	1.881014
88	0.56949091	8.67203620	4.93864579		88.00000000	0.39022727	3.38406504	1.902400
89	0.57931411	8.49763770	4.92280142		89.00000000	0.38584270	3.27875145	1.923885
90	0.58944541	8.26290510	4.87053148		90.00000000	0.38155556	3.15275735	1.945264
91	0.59925222	7.92420150	4.74859534		91.00000000	0.37736264	2.99029758	1.966609
92	0.60937387	7.48947050	4.56388762		92.00000000	0.37326087	2.79552627	1.988087
93	0.61916429	6.87979560	4.25972376		93.00000000	0.36924731	2.54034603	2.009599
94	0.62924951	6.06391860	3.81571781		94.00000000	0.36531915	2.21526558	2.030986
95	0.63940686	5.00609400	3.20093085		95.00000000	0.36147368	1.80957124	2.052330
96	0.64916456	3.69151930	2.39640350		96.00000000	0.35770833	1.32048722	2.073718
97	0.65919763	1.99443450	1.31472650		97.00000000	0.35402062	0.70607094	2.095192
98	0.66897392	-0.03251562	-0.02175210		98.00000000	0.35040816	-0.01139374	2.116564
99	0.67906356	-2.51395080	-1.70713238		99.00000000	0.34686869	-0.87201081	2.137914
100	0.68876320	-5.39872070	-3.71844015		100.00000000	0.34340000	-1.85392069	2.159283
101	0.69906569	-8.89872740	-6.22079501		101.00000000	0.34000000	-3.02556732	2.180758
