# Supplementary material for: Study on the Electrical Injection Regeneration of Industrialized B-Doped Czochralski Silicon PERC Solar Cells
Source: Hindawi journal article supplement (doi:10.1155/2019/5357370), 2019-06-20
Supplement: f1 [file 5357370.f1.zip › section3.3/IVRawData_3-8-2.5h.csv]

01:20 04/04/2018
Test Lot:	JK-PERC
Recipe:	Recipe_YJX-LID
Cell Name:	3-8-2.5h
Test Order:	2
Test Condition:	Light
1	-0.29983300	9.09769920	-2.72779044		1.00000000	34.34000000	312.41499053	0.000000
2	-0.29010761	9.09953980	-2.63984574		2.00000000	17.17000000	156.23909837	0.061803
3	-0.28001308	9.09806920	-2.54757838		3.00000000	11.44666667	104.14256544	0.083217
4	-0.27019244	9.10472680	-2.46002835		4.00000000	8.58500000	78.16407958	0.104705
5	-0.26005250	9.10955330	-2.36896211		5.00000000	6.86800000	62.56441206	0.126144
6	-0.24986643	9.10472010	-2.27496391		6.00000000	5.72333333	52.10934804	0.147544
7	-0.24000858	9.11481000	-2.18763261		7.00000000	4.90571429	44.71465363	0.168895
8	-0.22988279	9.09621720	-2.09106379		8.00000000	4.29250000	39.04551233	0.190386
9	-0.22006884	9.09509560	-2.00154714		9.00000000	3.81555556	34.70284254	0.211779
10	-0.20992295	9.10327150	-1.91098561		10.00000000	3.43400000	31.26063433	0.233168
11	-0.20009339	9.09193330	-1.81923576		11.00000000	3.12181818	28.38336268	0.254651
12	-0.18996982	9.11258700	-1.73111651		12.00000000	2.86166667	26.07718647	0.276048
13	-0.18015514	9.09737210	-1.63893834		13.00000000	2.64153846	24.03105830	0.297400
14	-0.17001075	9.11352830	-1.54939778		14.00000000	2.45285714	22.35418299	0.318779
15	-0.16022955	9.09974860	-1.45804862		15.00000000	2.28933333	20.83235779	0.340256
16	-0.15007696	9.11178110	-1.36746841		16.00000000	2.14625000	19.55616019	0.361653
17	-0.13988939	9.10042950	-1.27305353		17.00000000	2.02000000	18.38286759	0.383015
18	-0.13008289	9.09189610	-1.18270012		18.00000000	1.90777778	17.34531734	0.404391
19	-0.11989533	9.12116340	-1.09358490		19.00000000	1.80736842	16.48530269	0.425866
20	-0.11006874	9.09363370	-1.00092480		20.00000000	1.71700000	15.61376906	0.447254
21	-0.09990871	9.10470680	-0.90963951		21.00000000	1.63523810	14.88836341	0.468615
22	-0.09013719	9.09601970	-0.81988967		22.00000000	1.56090909	14.19805984	0.489990
23	-0.07994590	9.10761360	-0.72811637		23.00000000	1.49304348	13.59806309	0.511477
24	-0.07012601	9.10489180	-0.63848969		24.00000000	1.43083333	13.02758268	0.532850
25	-0.05999426	9.09480000	-0.54563578		25.00000000	1.37360000	12.49261728	0.554215
26	-0.04982381	9.10857870	-0.45382412		26.00000000	1.32076923	12.03033048	0.575591
27	-0.04003964	9.10723970	-0.36465060		27.00000000	1.27185185	11.58305968	0.597077
28	-0.02986994	9.09696770	-0.27172584		28.00000000	1.22642857	11.15678110	0.618465
29	-0.02005823	9.09643750	-0.18245842		29.00000000	1.18413793	10.77143668	0.639814
30	-0.00990936	9.10638050	-0.09023843		30.00000000	1.14466667	10.42377021	0.661190
31	-0.00065511	9.10773750	-0.00596659		31.00000000	1.10774194	10.08902277	0.682777
32	0.00948536	9.08765030	0.08619961		32.00000000	1.07312500	9.75218473	0.704149
33	0.01932432	9.09802910	0.17581325		33.00000000	1.04060606	9.46746422	0.725492
34	0.02945280	9.09838010	0.26797281		34.00000000	1.01000000	9.18936390	0.746873
35	0.03927465	9.09983830	0.35739298		35.00000000	0.98114286	8.92824135	0.768349
36	0.04941504	9.11480330	0.45040838		36.00000000	0.95388889	8.69450959	0.789717
37	0.05922573	9.10074140	0.53899803		37.00000000	0.92810811	8.44647188	0.811105
38	0.06936016	9.09626870	0.63091864		38.00000000	0.90368421	8.22015440	0.832450
39	0.07946929	9.11188410	0.72411492		39.00000000	0.88051282	8.02313077	0.853981
40	0.08935068	9.10398860	0.81344755		40.00000000	0.85850000	7.81577421	0.875362
41	0.09951116	9.10984330	0.90653108		41.00000000	0.83756098	7.63004924	0.896752
42	0.10929506	9.10798930	0.99545824		42.00000000	0.81761905	7.44686554	0.918230
43	0.11942502	9.10618880	1.08750678		43.00000000	0.79860465	7.27224473	0.939678
44	0.12926398	9.10800460	1.17733692		44.00000000	0.78045455	7.10838359	0.961054
45	0.13942671	9.09823610	1.26853713		45.00000000	0.76311111	6.94296506	0.982445
46	0.14926046	9.10044290	1.35833629		46.00000000	0.74652174	6.79367846	1.003793
47	0.15938671	9.10365490	1.45100160		47.00000000	0.73063830	6.65147892	1.025283
48	0.16954422	9.09967990	1.54279813		48.00000000	0.71541667	6.51006266	1.046674
49	0.17936011	9.10906600	1.63380308		49.00000000	0.70081633	6.38378217	1.068046
50	0.18951538	9.09488200	1.72362002		50.00000000	0.68680000	6.24636496	1.089410
51	0.19927992	9.10777760	1.81499719		51.00000000	0.67333333	6.13257025	1.110891
52	0.20945753	9.10832980	1.90780826		52.00000000	0.66038462	6.01500087	1.132268
53	0.21925408	9.09313300	1.99370651		53.00000000	0.64792453	5.89166391	1.153660
54	0.22939594	9.10898590	2.08956438		54.00000000	0.63592593	5.79264029	1.175019
55	0.23922077	9.09629060	2.17602164		55.00000000	0.62436364	5.67939308	1.196504
56	0.24939615	9.11057760	2.27214298		56.00000000	0.61321429	5.58673634	1.217901
57	0.25952312	9.10436250	2.36279256		57.00000000	0.60245614	5.48497909	1.239283
58	0.26934424	9.09095860	2.44859733		58.00000000	0.59206897	5.38247445	1.260760
59	0.27952033	9.10795780	2.54585937		59.00000000	0.58203390	5.30114018	1.282149
60	0.28932732	9.10292430	2.63372469		60.00000000	0.57233333	5.20990701	1.303495
61	0.29946473	9.09752850	2.72438892		61.00000000	0.56295082	5.12146113	1.324868
62	0.30928284	9.09929750	2.81425657		62.00000000	0.55387097	5.03983671	1.346351
63	0.31944111	9.10427760	2.90828054		63.00000000	0.54507937	4.96255385	1.367730
64	0.32925329	9.09405040	2.99424601		64.00000000	0.53656250	4.87952642	1.389072
65	0.33941525	9.09973140	3.08858761		65.00000000	0.52830769	4.80745810	1.410455
66	0.34924230	9.09896090	3.17774203		66.00000000	0.52030303	4.73421693	1.431936
67	0.35935366	9.09750840	3.26922294		67.00000000	0.51253731	4.66281251	1.453317
68	0.36953276	9.10363860	3.36409270		68.00000000	0.50500000	4.59733749	1.474681
69	0.37935236	9.10057450	3.45232441		69.00000000	0.49768116	4.52918447	1.496060
70	0.38947564	9.09737490	3.54320591		70.00000000	0.49057143	4.46291220	1.517533
71	0.39932057	9.10107040	3.63424462		71.00000000	0.48366197	4.40184166	1.538904
72	0.40945947	9.09540940	3.72420151		72.00000000	0.47694444	4.33800498	1.560249
73	0.41926643	9.09072780	3.81143699		73.00000000	0.47041096	4.27637798	1.581626
74	0.42943585	9.09253030	3.90465848		74.00000000	0.46405405	4.21942555	1.603102
75	0.43925098	9.10008240	3.99722011		75.00000000	0.45786667	4.16662439	1.624477
76	0.44940329	9.09260750	4.08624773		76.00000000	0.45184211	4.10842292	1.645839
77	0.45955780	9.08730510	4.17614194		77.00000000	0.44597403	4.05270204	1.667213
78	0.46941540	9.07449630	4.25970831		78.00000000	0.44025641	3.99510517	1.688683
79	0.47954088	9.07191280	4.35035305		79.00000000	0.43468354	3.94341121	1.710071
80	0.48936871	9.06896210	4.43806628		80.00000000	0.42925000	3.89285198	1.731434
81	0.49948081	9.05103020	4.52081590		81.00000000	0.42395062	3.83718984	1.752801
82	0.50933170	9.05036070	4.60963560		82.00000000	0.41878049	3.79011447	1.774283
83	0.51948249	9.02425770	4.68794386		83.00000000	0.41373494	3.73365072	1.795657
84	0.52921951	8.98709010	4.75614342		84.00000000	0.40880952	3.67400802	1.817048
85	0.53940749	8.94909000	4.82720617		85.00000000	0.40400000	3.61543236	1.838386
86	0.54953450	8.88298030	4.88150414		86.00000000	0.39930233	3.54699469	1.859864
87	0.55936605	8.80521680	4.92533934		87.00000000	0.39471264	3.47553040	1.881256
88	0.56946397	8.68393900	4.94519038		88.00000000	0.39022727	3.38870983	1.902633
89	0.57926428	8.51072120	4.92995679		89.00000000	0.38584270	3.28379962	1.924116
90	0.58940017	8.27125260	4.87507769		90.00000000	0.38155556	3.15594238	1.945501
91	0.59924436	7.94620420	4.76171805		91.00000000	0.37736264	2.99860057	1.966853
92	0.60935569	7.49343540	4.56616750		92.00000000	0.37326087	2.79700621	1.988323
93	0.61913365	6.89399340	4.26830330		93.00000000	0.36924731	2.54558853	2.009836
94	0.62925839	6.07639460	3.82362228		94.00000000	0.36531915	2.21982330	2.031217
95	0.63936830	5.00870470	3.20240701		95.00000000	0.36147368	1.81051494	2.052570
96	0.64914769	3.69733520	2.40011660		96.00000000	0.35770833	1.32256761	2.073953
97	0.65918463	1.98524080	1.30864022		97.00000000	0.35402062	0.70281618	2.095435
98	0.66897374	-0.04872479	-0.03259560		98.00000000	0.35040816	-0.01707356	2.116873
99	0.67905611	-2.55561570	-1.73540646		99.00000000	0.34686869	-0.88646306	2.138233
100	0.68879682	-5.46773150	-3.76615607		100.00000000	0.34340000	-1.87761900	2.159608
101	0.69903618	-8.98107720	-6.27809790		101.00000000	0.34000000	-3.05356625	2.181083
01:21 04/04/2018
Test Lot:	JK-PERC
Recipe:	Recipe_YJX-LID
Cell Name:	3-8-2.5h
Test Order:	3
Test Condition:	Light
1	-0.29991788	9.09439950	-2.72757302		1.00000000	34.34000000	312.30167883	0.000000
2	-0.29011062	9.10247140	-2.64072362		2.00000000	17.17000000	156.28943394	0.061794
3	-0.27991489	9.10093120	-2.54748616		3.00000000	11.44666667	104.17532580	0.083220
4	-0.27010018	9.10616490	-2.45957678		4.00000000	8.58500000	78.17642567	0.104730
5	-0.25997886	9.10396860	-2.36683938		5.00000000	6.86800000	62.52605634	0.126123
6	-0.24981362	9.09989830	-2.27327854		6.00000000	5.72333333	52.08175127	0.147472
7	-0.24001382	9.09259220	-2.18234779		7.00000000	4.90571429	44.60565945	0.168856
8	-0.22989100	9.12807750	-2.09846286		8.00000000	4.29250000	39.18227267	0.190351
9	-0.22007409	9.09482480	-2.00153529		9.00000000	3.81555556	34.70180929	0.211724
10	-0.20989768	9.10677910	-1.91149181		10.00000000	3.43400000	31.27267943	0.233080
11	-0.20006067	9.10130020	-1.82081222		11.00000000	3.12181818	28.41260444	0.254459
12	-0.18995199	9.10642050	-1.72978270		12.00000000	2.86166667	26.05954000	0.275949
13	-0.18016261	9.10478310	-1.64034149		13.00000000	2.64153846	24.05063474	0.297330
14	-0.17002192	9.10456470	-1.54797557		14.00000000	2.45285714	22.33219656	0.318672
15	-0.16019310	9.09164050	-1.45641808		15.00000000	2.28933333	20.81379565	0.340046
16	-0.15003009	9.10820290	-1.36650450		16.00000000	2.14625000	19.54848047	0.361536
17	-0.13986412	9.10545730	-1.27352677		17.00000000	2.02000000	18.39302375	0.382911
18	-0.13005538	9.10420040	-1.18405024		18.00000000	1.90777778	17.36879121	0.404271
19	-0.11995786	9.10376360	-1.09206800		19.00000000	1.80736842	16.45385484	0.425647
20	-0.11013797	9.09771540	-1.00200391		20.00000000	1.71700000	15.62077734	0.447114
21	-0.09992807	9.10699270	-0.91004424		21.00000000	1.63523810	14.89210140	0.468496
22	-0.09012529	9.10941790	-0.82098896		22.00000000	1.56090909	14.21897321	0.489879
23	-0.07998387	9.07707790	-0.72601980		23.00000000	1.49304348	13.55247196	0.511248
24	-0.07015207	9.11756320	-0.63961590		24.00000000	1.43083333	13.04571335	0.532726
25	-0.05997120	9.08712100	-0.54496551		25.00000000	1.37360000	12.48206941	0.554108
26	-0.04984838	9.10271840	-0.45375577		26.00000000	1.32076923	12.02259038	0.575501
27	-0.04003593	9.10296540	-0.36444565		27.00000000	1.27185185	11.57762340	0.596861
28	-0.02989450	9.09120660	-0.27177710		28.00000000	1.22642857	11.14971552	0.618337
29	-0.02003665	9.10009670	-0.18233543		29.00000000	1.18413793	10.77576968	0.639720
30	-0.00990937	9.09516530	-0.09012732		30.00000000	1.14466667	10.41093255	0.661100
31	-0.00063130	9.09709260	-0.00574296		31.00000000	1.10774194	10.07723096	0.682731
32	0.00950769	9.09131530	0.08643737		32.00000000	1.07312500	9.75611773	0.704121
33	0.01932433	9.10967450	0.17603833		33.00000000	1.04060606	9.47958249	0.725477
34	0.02946546	9.10527710	0.26829117		34.00000000	1.01000000	9.19632987	0.746854
35	0.03928657	9.08959480	0.35709896		35.00000000	0.98114286	8.91819101	0.768334
36	0.04942919	9.10782050	0.45019218		36.00000000	0.95388889	8.68784878	0.789706
37	0.05923690	9.10600280	0.53941137		37.00000000	0.92810811	8.45135503	0.811052
38	0.06937208	9.09530070	0.63095993		38.00000000	0.90368421	8.21927963	0.832438
39	0.07954596	9.10962490	0.72463386		39.00000000	0.88051282	8.02114151	0.853913
40	0.08936706	9.09774680	0.81303890		40.00000000	0.85850000	7.81041563	0.875300
41	0.09950075	9.10016730	0.90547350		41.00000000	0.83756098	7.62194500	0.896656
42	0.10929283	9.09457780	0.99397215		42.00000000	0.81761905	7.43590004	0.918025
43	0.11948830	9.11403180	1.08902017		43.00000000	0.79860465	7.27850819	0.939494
44	0.12930122	9.08940790	1.17527153		44.00000000	0.78045455	7.09386971	0.960865
45	0.13941109	9.11143680	1.27023534		45.00000000	0.76311111	6.95303866	0.982224
46	0.14923517	9.07974620	1.35501747		46.00000000	0.74652174	6.77822792	1.003612
47	0.15941130	9.10915570	1.45210235		47.00000000	0.73063830	6.65549802	1.025098
48	0.16954572	9.09411720	1.54186865		48.00000000	0.71541667	6.50608301	1.046484
49	0.17939140	9.10219960	1.63285633		49.00000000	0.70081633	6.37897009	1.067843
50	0.18951616	9.09983830	1.72456641		50.00000000	0.68680000	6.24976894	1.089219
51	0.19928516	9.09455970	1.81241078		51.00000000	0.67333333	6.12367020	1.110703
52	0.20940694	9.10621170	1.90690393		52.00000000	0.66038462	6.01360211	1.132098
53	0.21926972	9.10058590	1.99548292		53.00000000	0.64792453	5.89649283	1.153469
54	0.22941235	9.09512040	2.08653294		54.00000000	0.63592593	5.78382286	1.174833
55	0.23925281	9.09763720	2.17663526		55.00000000	0.62436364	5.68023384	1.196319
56	0.24940361	9.09967990	2.26949302		56.00000000	0.61321429	5.58005371	1.217702
57	0.25952986	9.08984660	2.35908662		57.00000000	0.60245614	5.47623390	1.239094
58	0.26939264	9.09965800	2.45138089		58.00000000	0.59206897	5.38762510	1.260454
59	0.27954346	9.10118200	2.54417591		59.00000000	0.58203390	5.29719644	1.281932
60	0.28933999	9.10654350	2.63488721		60.00000000	0.57233333	5.21197840	1.303318
61	0.29949006	9.08980850	2.72230729		61.00000000	0.56295082	5.11711515	1.324702
62	0.30931714	9.11752320	2.82020620		62.00000000	0.55387097	5.04993140	1.346183
63	0.31946272	9.07939910	2.90052953		63.00000000	0.54507937	4.94899310	1.367580
64	0.32923397	9.10057450	2.99621827		64.00000000	0.53656250	4.88302701	1.388942
65	0.33942944	9.10193730	3.08946548		65.00000000	0.52830769	4.80862349	1.410314
66	0.34922448	9.09351830	3.17567920		66.00000000	0.52030303	4.73138513	1.431792
67	0.35940731	9.09224130	3.26781799		67.00000000	0.51253731	4.66011293	1.453171
68	0.36956555	9.10227110	3.36388583		68.00000000	0.50500000	4.59664691	1.474515
69	0.37938741	9.09404560	3.45016641		69.00000000	0.49768116	4.52593516	1.495901
70	0.38952333	9.10518550	3.54668218		70.00000000	0.49057143	4.46674386	1.517387
71	0.39932656	9.09906860	3.63349976		71.00000000	0.48366197	4.40087346	1.538776
72	0.40947813	9.08971500	3.72203950		72.00000000	0.47694444	4.33528907	1.560120
73	0.41929105	9.10161210	3.81622449		73.00000000	0.47041096	4.28149808	1.581495
74	0.42942026	9.08285430	3.90036166		74.00000000	0.46405405	4.21493536	1.602978
75	0.43924659	9.09000870	3.99275532		75.00000000	0.45786667	4.16201198	1.624352
76	0.44943088	9.08967110	4.08517888		76.00000000	0.45184211	4.10709613	1.645688
77	0.45953184	9.07844160	4.17183297		77.00000000	0.44597403	4.04874915	1.667060
78	0.46942884	9.08550930	4.26500009		78.00000000	0.44025641	3.99995371	1.688551
79	0.47954690	9.06702330	4.34806292		79.00000000	0.43468354	3.94128582	1.709922
80	0.48939779	9.07274060	4.44017920		80.00000000	0.42925000	3.89447390	1.731298
81	0.49949947	9.05899430	4.52496285		81.00000000	0.42395062	3.84056623	1.752677
82	0.50933993	9.04424290	4.60659405		82.00000000	0.41878049	3.78755245	1.774154
83	0.51947957	9.03447820	4.69322685		83.00000000	0.41373494	3.73787929	1.795550
84	0.52923298	8.98524760	4.75528936		84.00000000	0.40880952	3.67325479	1.816917
85	0.53939193	8.95602890	4.83080971		85.00000000	0.40400000	3.61823568	1.838289
86	0.54951227	8.87812230	4.87863714		86.00000000	0.39930233	3.54505488	1.859756
87	0.55938172	8.80426980	4.92494758		87.00000000	0.39471264	3.47515661	1.881124
88	0.56947076	8.67665000	4.94109847		88.00000000	0.39022727	3.38586547	1.902523
89	0.57928443	8.51377770	4.93189886		89.00000000	0.38584270	3.28497895	1.923868
90	0.58946651	8.26821520	4.87383596		90.00000000	0.38155556	3.15478344	1.945346
91	0.59923697	7.94946340	4.76361236		91.00000000	0.37736264	2.99983047	1.966721
92	0.60935056	7.47748230	4.55640803		92.00000000	0.37326087	2.79105155	1.988205
93	0.61916721	6.90732430	4.27678872		93.00000000	0.36924731	2.55051093	2.009733
94	0.62927562	6.07768580	3.82453950		94.00000000	0.36531915	2.22029500	2.031133
95	0.63936239	5.01653150	3.20738157		95.00000000	0.36147368	1.81334412	2.052492
96	0.64918351	3.69612570	2.39946386		96.00000000	0.35770833	1.32213496	2.073866
97	0.65920854	1.99628830	1.31597030		97.00000000	0.35402062	0.70672722	2.095361
98	0.66899914	-0.03564931	-0.02384936		98.00000000	0.35040816	-0.01249181	2.116742
99	0.67909193	-2.55672650	-1.73625233		99.00000000	0.34686869	-0.88684836	2.138094
100	0.68877977	-5.44754310	-3.75215748		100.00000000	0.34340000	-1.87068630	2.159485
101	0.69907278	-8.99211880	-6.28614549		101.00000000	0.34000000	-3.05732039	2.180964
01:21 04/04/2018
Test Lot:	JK-PERC
Recipe:	Recipe_YJX-LID
Cell Name:	3-8-2.5h
Test Order:	4
Test Condition:	Light
1	-0.29989028	9.10380550	-2.73014278		1.00000000	34.34000000	312.62468087	0.000000
2	-0.29013678	9.10052490	-2.64039699		2.00000000	17.17000000	156.25601253	0.061797
3	-0.27997246	9.10208030	-2.54833181		3.00000000	11.44666667	104.18847917	0.083201
4	-0.27016613	9.10400960	-2.45959504		4.00000000	8.58500000	78.15792242	0.104688
5	-0.26000553	9.09919450	-2.36584089		5.00000000	6.86800000	62.49326783	0.126070
6	-0.24985833	9.10420800	-2.27476221		6.00000000	5.72333333	52.10641712	0.147453
7	-0.24002373	9.10598850	-2.18565333		7.00000000	4.90571429	44.67137787	0.168810
8	-0.22985122	9.09659770	-2.09086408		8.00000000	4.29250000	39.04714563	0.190289
9	-0.22007318	9.10188290	-2.00308031		9.00000000	3.81555556	34.72873987	0.211674
10	-0.20991407	9.10197160	-1.91063190		10.00000000	3.43400000	31.25617047	0.233065
11	-0.20004894	9.11349580	-1.82314517		11.00000000	3.12181818	28.45067689	0.254544
12	-0.18991068	9.10510060	-1.72915585		12.00000000	2.86166667	26.05576288	0.275920
13	-0.18017952	9.10779950	-1.64103894		13.00000000	2.64153846	24.05860268	0.297269
14	-0.16999510	9.08836650	-1.54497777		14.00000000	2.45285714	22.29246469	0.318651
15	-0.16019547	9.10305500	-1.45826817		15.00000000	2.28933333	20.83992725	0.340129
16	-0.15001999	9.09236240	-1.36403612		16.00000000	2.14625000	19.51448280	0.361508
17	-0.13985047	9.12540340	-1.27619195		17.00000000	2.02000000	18.43331487	0.382857
18	-0.13005902	9.08697130	-1.18184258		18.00000000	1.90777778	17.33592191	0.404233
19	-0.11991331	9.09693340	-1.09084339		19.00000000	1.80736842	16.44151016	0.425721
20	-0.11009730	9.10290150	-1.00220488		20.00000000	1.71700000	15.62968188	0.447099
21	-0.09994490	9.10520270	-0.91001855		21.00000000	1.63523810	14.88917432	0.468451
22	-0.09011996	9.09809680	-0.81992010		22.00000000	1.56090909	14.20130201	0.489821
23	-0.07996234	9.10368250	-0.72795172		23.00000000	1.49304348	13.59219378	0.511296
24	-0.07010391	9.10050300	-0.63798088		24.00000000	1.43083333	13.02130304	0.532693
25	-0.05999095	9.09649280	-0.54570724		25.00000000	1.37360000	12.49494251	0.554036
26	-0.04982961	9.09856030	-0.45337771		26.00000000	1.32076923	12.01709849	0.575403
27	-0.04004263	9.09828660	-0.36431931		27.00000000	1.27185185	11.57167266	0.596890
28	-0.02989841	9.11444660	-0.27250743		28.00000000	1.22642857	11.17821772	0.618278
29	-0.02004891	9.09624770	-0.18236986		29.00000000	1.18413793	10.77121193	0.639622
30	-0.00993371	9.10093880	-0.09040612		30.00000000	1.14466667	10.41754128	0.661002
31	-0.00067665	9.11125760	-0.00616510		31.00000000	1.10774194	10.09292213	0.682587
32	0.00949714	9.08859060	0.08631561		32.00000000	1.07312500	9.75319379	0.703957
33	0.01926821	9.11459540	0.17562193		33.00000000	1.04060606	9.48470321	0.725324
34	0.02941661	9.08963490	0.26738623		34.00000000	1.01000000	9.18053125	0.746690
35	0.03923754	9.10441300	0.35723481		35.00000000	0.98114286	8.93272978	0.768181
36	0.04938892	9.09339710	0.44911305		36.00000000	0.95388889	8.67409046	0.789555
37	0.05920390	9.10382270	0.53898181		37.00000000	0.92810811	8.44933166	0.810934
38	0.06935379	9.10117440	0.63120093		38.00000000	0.90368421	8.22458760	0.832285
39	0.07950219	9.09154800	0.72279796		39.00000000	0.88051282	8.00522457	0.853768
40	0.08932461	9.10192970	0.81302630		40.00000000	0.85850000	7.81400665	0.875147
41	0.09947524	9.10692690	0.90591376		41.00000000	0.83756098	7.62760658	0.896541
42	0.10928947	9.09400080	0.99387853		42.00000000	0.81761905	7.43542827	0.918034
43	0.11942448	9.10013100	1.08677841		43.00000000	0.79860465	7.26740694	0.939408
44	0.12924989	9.09332370	1.17531109		44.00000000	0.78045455	7.09692581	0.960778
45	0.13940869	9.10117440	1.26878280		45.00000000	0.76311111	6.94520731	0.982146
46	0.14923707	9.09574320	1.35742206		46.00000000	0.74652174	6.79017003	1.003622
47	0.15940556	9.10976700	1.45214751		47.00000000	0.73063830	6.65594465	1.025026
48	0.16950931	9.09375100	1.54147546		48.00000000	0.71541667	6.50582103	1.046379
49	0.17936076	9.10681340	1.63340497		49.00000000	0.70081633	6.38220351	1.067758
50	0.18951139	9.09497740	1.72360181		50.00000000	0.68680000	6.24643048	1.089241
51	0.19928172	9.08370210	1.81021578		51.00000000	0.67333333	6.11635941	1.110611
52	0.20942342	9.09927650	1.90560160		52.00000000	0.66038462	6.00902221	1.131979
53	0.21928751	9.10251430	1.99606770		53.00000000	0.64792453	5.89774228	1.153354
54	0.22943294	9.09266760	2.08615746		54.00000000	0.63592593	5.78226306	1.174830
55	0.23924792	9.10098360	2.17739140		55.00000000	0.62436364	5.68232321	1.196218
56	0.24937697	9.09345050	2.26769713		56.00000000	0.61321429	5.57623375	1.217558
57	0.25953802	9.10078720	2.36200029		57.00000000	0.60245614	5.48282513	1.238936
58	0.26937532	9.09222030	2.44921975		58.00000000	0.59206897	5.38322147	1.260432
59	0.27951702	9.09763910	2.54294497		59.00000000	0.58203390	5.29513435	1.281798
60	0.28932679	9.09782120	2.63224340		60.00000000	0.57233333	5.20698633	1.303137
61	0.29948562	9.09797000	2.72471119		61.00000000	0.56295082	5.12170967	1.324522
62	0.30928570	9.10337160	2.81554266		62.00000000	0.55387097	5.04209324	1.346007
63	0.31943113	9.09508610	2.90525363		63.00000000	0.54507937	4.95754376	1.367406
64	0.32924983	9.09177780	2.99346630		64.00000000	0.53656250	4.87830703	1.388780
65	0.33940941	9.09799000	3.08794342		65.00000000	0.52830769	4.80653810	1.410141
66	0.34923032	9.10682680	3.18038004		66.00000000	0.52030303	4.73830958	1.431616
67	0.35935640	9.09668450	3.26895179		67.00000000	0.51253731	4.66239023	1.452995
68	0.36950481	9.10168270	3.36311554		68.00000000	0.50500000	4.59634976	1.474367
69	0.37933242	9.08862020	3.44760829		69.00000000	0.49768116	4.52323504	1.495723
70	0.38947859	9.09404750	3.54193680		70.00000000	0.49057143	4.46127987	1.517210
71	0.39931369	9.09349350	3.63115644		71.00000000	0.48366197	4.39817700	1.538582
72	0.40948367	9.09404750	3.72386395		72.00000000	0.47694444	4.33735543	1.559975
73	0.41929194	9.09211160	3.81224911		73.00000000	0.47041096	4.27702894	1.581453
74	0.42945448	9.08904460	3.90333092		74.00000000	0.46405405	4.21780799	1.602832
75	0.43925607	9.08502390	3.99065189		75.00000000	0.45786667	4.15972961	1.624195
76	0.44939554	9.08964350	4.08484525		76.00000000	0.45184211	4.10708366	1.645568
77	0.45956627	9.07534600	4.17072291		77.00000000	0.44597403	4.04736859	1.667030
78	0.46937752	9.08779430	4.26560635		78.00000000	0.44025641	4.00095970	1.688400
79	0.47954601	9.07123850	4.35007623		79.00000000	0.43468354	3.94311810	1.709740
80	0.48939300	9.07475850	4.44112329		80.00000000	0.42925000	3.89534009	1.731118
81	0.49948111	9.05762390	4.52411204		81.00000000	0.42395062	3.83998524	1.752598
82	0.50933927	9.03815940	4.60348951		82.00000000	0.41878049	3.78500480	1.773971
83	0.51946682	9.01656720	4.68380749		83.00000000	0.41373494	3.73046889	1.795335
84	0.52926093	8.98766800	4.75682152		84.00000000	0.40880952	3.67424428	1.816707
85	0.53938031	8.94709210	4.82588531		85.00000000	0.40400000	3.61462521	1.838176
86	0.54953021	8.87908460	4.87932522		86.00000000	0.39930233	3.54543913	1.859571
87	0.55937719	8.80614190	4.92595491		87.00000000	0.39471264	3.47589555	1.880933
88	0.56947500	8.66718200	4.93574347		88.00000000	0.39022727	3.38217079	1.902302
89	0.57929742	8.51404090	4.93216193		89.00000000	0.38584270	3.28508050	1.923785
90	0.58944434	8.26207350	4.87003246		90.00000000	0.38155556	3.15244004	1.945159
91	0.59923625	7.94307280	4.75977716		91.00000000	0.37736264	2.99741890	1.966506
92	0.60934889	7.47909690	4.55737939		92.00000000	0.37326087	2.79165421	1.987984
93	0.61914158	6.89219620	4.26724524		93.00000000	0.36924731	2.54492492	2.009507
94	0.62924904	6.07571510	3.82313789		94.00000000	0.36531915	2.21957507	2.030895
95	0.63933939	5.01124430	3.20388587		95.00000000	0.36147368	1.81143294	2.052263
96	0.64916849	3.69326880	2.39755373		96.00000000	0.35770833	1.32111303	2.073624
97	0.65915686	1.99144550	1.31267496		97.00000000	0.35402062	0.70501277	2.095102
98	0.66895324	-0.04444260	-0.02973002		98.00000000	0.35040816	-0.01557305	2.116477
99	0.67905778	-2.55502960	-1.73501273		99.00000000	0.34686869	-0.88625976	2.137858
100	0.68876630	-5.45168690	-3.75493821		100.00000000	0.34340000	-1.87210928	2.159210
101	0.69903380	-8.96806140	-6.26897804		101.00000000	0.34000000	-3.04914088	2.180680
