# Supplementary material for: Study on the Electrical Injection Regeneration of Industrialized B-Doped Czochralski Silicon PERC Solar Cells
Source: Hindawi journal article supplement (doi:10.1155/2019/5357370), 2019-06-20
Supplement: f1 [file 5357370.f1.zip › section3.3/IVRawData_3-8-2h.csv]

00:17 04/04/2018
Test Lot:	JK-PERC
Recipe:	Recipe_YJX-LID
Cell Name:	3-8-2h
Test Order:	2
Test Condition:	Light
1	-0.29991421	9.07481770	-2.72166678		1.00000000	34.34000000	311.62923982	0.000000
2	-0.29010028	9.09832000	-2.63942518		2.00000000	17.17000000	156.21815440	0.061819
3	-0.27997968	9.10042950	-2.54793534		3.00000000	11.44666667	104.16958301	0.083259
4	-0.27013299	9.09785270	-2.45763015		4.00000000	8.58500000	78.10506543	0.104754
5	-0.25997370	9.09576700	-2.36466020		5.00000000	6.86800000	62.46972776	0.126126
6	-0.24982335	9.08891580	-2.27062339		6.00000000	5.72333333	52.01889476	0.147478
7	-0.23999006	9.09261800	-2.18213794		7.00000000	4.90571429	44.60578602	0.168840
8	-0.22985235	9.08302690	-2.08775508		8.00000000	4.29250000	38.98889297	0.190332
9	-0.22002724	9.10284330	-2.00287349		9.00000000	3.81555556	34.73240432	0.211701
10	-0.20988582	9.08307360	-1.90640835		10.00000000	3.43400000	31.19127474	0.233037
11	-0.20007782	9.09215070	-1.81913769		11.00000000	3.12181818	28.38404137	0.254410
12	-0.18994682	9.08554170	-1.72576975		12.00000000	2.86166667	25.99979183	0.275887
13	-0.18014628	9.09086700	-1.63768587		13.00000000	2.64153846	24.01387483	0.297269
14	-0.17002495	9.09217070	-1.54589587		14.00000000	2.45285714	22.30179585	0.318669
15	-0.16018718	9.09553810	-1.45698860		15.00000000	2.28933333	20.82271856	0.340020
16	-0.15003459	9.08018300	-1.36234153		16.00000000	2.14625000	19.48834276	0.361488
17	-0.13990805	9.09479900	-1.27243559		17.00000000	2.02000000	18.37149398	0.382876
18	-0.13007252	9.09318160	-1.18277305		18.00000000	1.90777778	17.34776979	0.404248
19	-0.11991473	9.09381770	-1.09048269		19.00000000	1.80736842	16.43587894	0.425708
20	-0.11013055	9.09213730	-1.00132208		20.00000000	1.71700000	15.61119974	0.447161
21	-0.09991396	9.08854870	-0.90807285		21.00000000	1.63523810	14.86194106	0.468522
22	-0.09013871	9.09184650	-0.81952732		22.00000000	1.56090909	14.19154586	0.489907
23	-0.07999505	9.09205720	-0.72731958		23.00000000	1.49304348	13.57483671	0.511243
24	-0.07012677	9.09463880	-0.63777766		24.00000000	1.43083333	13.01291235	0.532736
25	-0.05999205	9.08952520	-0.54529924		25.00000000	1.37360000	12.48537181	0.554135
26	-0.04987816	9.09147930	-0.45346627		26.00000000	1.32076923	12.00774612	0.575546
27	-0.04006422	9.09359930	-0.36432793		27.00000000	1.27185185	11.56571111	0.596896
28	-0.02988335	9.08627800	-0.27152839		28.00000000	1.22642857	11.14367095	0.618367
29	-0.02008503	9.08772470	-0.18252721		29.00000000	1.18413793	10.76111952	0.639780
30	-0.00990416	9.09014800	-0.09003026		30.00000000	1.14466667	10.40518941	0.661162
31	-0.00066330	9.09053130	-0.00602975		31.00000000	1.10774194	10.06996274	0.682665
32	0.00950620	9.08196160	0.08633493		32.00000000	1.07312500	9.74608004	0.704147
33	0.01933475	9.10605240	0.17606325		33.00000000	1.04060606	9.47581332	0.725513
34	0.02947365	9.07493780	0.26747157		34.00000000	1.01000000	9.16568718	0.746908
35	0.03926350	9.09247590	0.35700245		35.00000000	0.98114286	8.92101778	0.768393
36	0.04940985	9.08423140	0.44885049		36.00000000	0.95388889	8.66534740	0.789785
37	0.05922202	9.09752560	0.53877388		37.00000000	0.92810811	8.44348727	0.811145
38	0.06939516	9.08498100	0.63045373		38.00000000	0.90368421	8.20995388	0.832509
39	0.07956607	9.09614750	0.72374470		39.00000000	0.88051282	8.00927449	0.854000
40	0.08938048	9.09290790	0.81272847		40.00000000	0.85850000	7.80626143	0.875369
41	0.09951715	9.09027100	0.90463788		41.00000000	0.83756098	7.61365625	0.896703
42	0.10930254	9.08553310	0.99307185		42.00000000	0.81761905	7.42850492	0.918074
43	0.11948162	9.09921840	1.08718936		43.00000000	0.79860465	7.26667814	0.939555
44	0.12929380	9.09555530	1.17599891		44.00000000	0.78045455	7.09866748	0.960940
45	0.13942377	9.09098240	1.26749904		45.00000000	0.76311111	6.93742968	0.982296
46	0.14924116	9.09593390	1.35748773		46.00000000	0.74652174	6.79031239	1.003670
47	0.15941578	9.08503910	1.44829859		47.00000000	0.73063830	6.63787750	1.025137
48	0.16954426	9.09686180	1.54232070		48.00000000	0.71541667	6.50804655	1.046525
49	0.17937505	9.09906480	1.63214520		49.00000000	0.70081633	6.37677317	1.067886
50	0.18949908	9.08409500	1.72142765		50.00000000	0.68680000	6.23895645	1.089267
51	0.19929264	9.08870890	1.81131279		51.00000000	0.67333333	6.11973066	1.110747
52	0.20944718	9.08766460	1.90338572		52.00000000	0.66038462	6.00135389	1.132124
53	0.21923852	9.09152130	1.99321167		53.00000000	0.64792453	5.89061965	1.153485
54	0.22938783	9.08948520	2.08501729		54.00000000	0.63592593	5.78023929	1.174858
55	0.23924839	9.09001920	2.17477246		55.00000000	0.62436364	5.67547744	1.196330
56	0.24938133	9.09164620	2.26728682		56.00000000	0.61321429	5.57512733	1.217714
57	0.25950983	9.09379100	2.35992816		57.00000000	0.60245614	5.47861023	1.239074
58	0.26935327	9.08326530	2.44660721		58.00000000	0.59206897	5.37791949	1.260434
59	0.27948695	9.09106920	2.54083520		59.00000000	0.58203390	5.29131045	1.281908
60	0.28933114	9.09385970	2.63113679		60.00000000	0.57233333	5.20471903	1.303289
61	0.29945663	9.08926010	2.72183920		61.00000000	0.56295082	5.11680642	1.324676
62	0.30927476	9.08569050	2.80997475		62.00000000	0.55387097	5.03230019	1.346029
63	0.31943527	9.08585550	2.90234270		63.00000000	0.54507937	4.95251235	1.367505
64	0.32924223	9.09421160	2.99419851		64.00000000	0.53656250	4.87961291	1.388885
65	0.33941314	9.08427810	3.08332335		65.00000000	0.52830769	4.79929400	1.410264
66	0.34925285	9.09969710	3.17809515		66.00000000	0.52030303	4.73459998	1.431741
67	0.35939845	9.07533170	3.26166015		67.00000000	0.51253731	4.65144613	1.453139
68	0.36951873	9.08239940	3.35611669		68.00000000	0.50500000	4.58661170	1.474495
69	0.37934953	9.09337900	3.44956905		69.00000000	0.49768116	4.52560340	1.495871
70	0.38951448	9.08927820	3.54040547		70.00000000	0.49057143	4.45894019	1.517352
71	0.39931399	9.08247570	3.62675961		71.00000000	0.48366197	4.39284811	1.538730
72	0.40949458	9.08304500	3.71945770		72.00000000	0.47694444	4.33210785	1.560079
73	0.41930452	9.08205890	3.80814835		73.00000000	0.47041096	4.27230004	1.581463
74	0.42942855	9.08770750	3.90252105		74.00000000	0.46405405	4.21718751	1.602943
75	0.43928015	9.07882400	3.98814717		75.00000000	0.45786667	4.15689088	1.624311
76	0.44940940	9.08763600	4.08406904		76.00000000	0.45184211	4.10617658	1.645680
77	0.45957658	9.07225420	4.16939556		77.00000000	0.44597403	4.04598973	1.667063
78	0.46939397	9.08135600	4.26273375		78.00000000	0.44025641	3.99812519	1.688531
79	0.47955668	9.05891320	4.34426234		79.00000000	0.43468354	3.93776050	1.709906
80	0.48936439	9.05784510	4.43258684		80.00000000	0.42925000	3.88808001	1.731240
81	0.49950552	9.06011100	4.52557546		81.00000000	0.42395062	3.84103965	1.752617
82	0.50934374	9.03673840	4.60280613		82.00000000	0.41878049	3.78440972	1.774103
83	0.51947594	9.02711870	4.68937097		83.00000000	0.41373494	3.73483441	1.795474
84	0.52924198	8.98544500	4.75547470		84.00000000	0.40880952	3.67333549	1.816848
85	0.53936601	8.94627290	4.82531552		85.00000000	0.40400000	3.61429425	1.838219
86	0.54954880	8.88452910	4.88248231		86.00000000	0.39930233	3.54761313	1.859694
87	0.55930889	8.79993530	4.92188204		87.00000000	0.39471264	3.47344573	1.881087
88	0.56947088	8.68253610	4.94445147		88.00000000	0.39022727	3.38816238	1.902440
89	0.57928604	8.51517870	4.93272415		89.00000000	0.38584270	3.28551951	1.923795
90	0.58940035	8.26896570	4.87373128		90.00000000	0.38155556	3.15506980	1.945269
91	0.59920067	7.96634630	4.77344004		91.00000000	0.37736264	3.00620145	1.966641
92	0.60930085	7.49361940	4.56586867		92.00000000	0.37326087	2.79707489	1.988115
93	0.61913908	6.91625830	4.28212580		93.00000000	0.36924731	2.55380979	2.009499
94	0.62923706	6.09725620	3.83661957		94.00000000	0.36531915	2.22744445	2.030992
95	0.63934767	5.03769920	3.22084125		95.00000000	0.36147368	1.82099569	2.052433
96	0.64917397	3.73060680	2.42181283		96.00000000	0.35770833	1.33446914	2.073833
97	0.65929729	2.03328010	1.34053606		97.00000000	0.35402062	0.71982308	2.095313
98	0.66898441	0.02301131	0.01539421		98.00000000	0.35040816	0.00806335	2.116700
99	0.67910844	-2.44759150	-1.66218005		99.00000000	0.34686869	-0.84899285	2.138051
100	0.68879479	-5.31785250	-3.66290910		100.00000000	0.34340000	-1.82615055	2.159423
101	0.69907886	-8.79250720	-6.14665591		101.00000000	0.34000000	-2.98945245	2.180907
00:17 04/04/2018
Test Lot:	JK-PERC
Recipe:	Recipe_YJX-LID
Cell Name:	3-8-2h
Test Order:	3
Test Condition:	Light
1	-0.29990590	9.07940770	-2.72296794		1.00000000	34.34000000	311.78686042	0.000000
2	-0.29009953	9.09759710	-2.63920864		2.00000000	17.17000000	156.20574221	0.061783
3	-0.27993816	9.09823130	-2.54694213		3.00000000	11.44666667	104.14442095	0.083247
4	-0.27013403	9.08476350	-2.45410378		4.00000000	8.58500000	77.99269465	0.104738
5	-0.25997344	9.08822440	-2.36269696		5.00000000	6.86800000	62.41792518	0.126135
6	-0.24981950	9.10425280	-2.27441988		6.00000000	5.72333333	52.10667353	0.147482
7	-0.24000347	9.07807450	-2.17876938		7.00000000	4.90571429	44.53443976	0.168855
8	-0.22981828	9.09028050	-2.08911263		8.00000000	4.29250000	39.02002905	0.190349
9	-0.21998961	9.09356500	-2.00048982		9.00000000	3.81555556	34.69700246	0.211718
10	-0.20986174	9.08812620	-1.90724998		10.00000000	3.43400000	31.20862537	0.233077
11	-0.20002487	9.09342960	-1.81891207		11.00000000	3.12181818	28.38803386	0.254457
12	-0.18989104	9.08179280	-1.72455108		12.00000000	2.86166667	25.98906373	0.275933
13	-0.18010256	9.09207820	-1.63750656		13.00000000	2.64153846	24.01707426	0.297301
14	-0.16996351	9.08758830	-1.54455840		14.00000000	2.45285714	22.29055587	0.318648
15	-0.16013484	9.09015370	-1.45565031		15.00000000	2.28933333	20.81039187	0.340023
16	-0.14999877	9.08991150	-1.36347554		16.00000000	2.14625000	19.50922256	0.361500
17	-0.13984708	9.09579470	-1.27202033		17.00000000	2.02000000	18.37350529	0.382867
18	-0.13001989	9.09184460	-1.18212063		18.00000000	1.90777778	17.34521909	0.404221
19	-0.11986597	9.09202960	-1.08982495		19.00000000	1.80736842	16.43264718	0.425604
20	-0.11007971	9.09311580	-1.00096755		20.00000000	1.71700000	15.61287983	0.447072
21	-0.09988039	9.08515740	-0.90742906		21.00000000	1.63523810	14.85639548	0.468448
22	-0.09004873	9.09946630	-0.81939538		22.00000000	1.56090909	14.20343967	0.489832
23	-0.07991118	9.09280400	-0.72661670		23.00000000	1.49304348	13.57595171	0.511181
24	-0.07010632	9.09248350	-0.63744056		24.00000000	1.43083333	13.00982847	0.532661
25	-0.05999482	9.08273220	-0.54491689		25.00000000	1.37360000	12.47604095	0.554046
26	-0.04983718	9.09259700	-0.45314936		26.00000000	1.32076923	12.00922235	0.575430
27	-0.04003157	9.09005360	-0.36388909		27.00000000	1.27185185	11.56120150	0.596919
28	-0.02987467	9.08992200	-0.27155840		28.00000000	1.22642857	11.14814005	0.618301
29	-0.02008469	9.08728500	-0.18251528		29.00000000	1.18413793	10.76059886	0.639650
30	-0.00993002	9.09282590	-0.09029196		30.00000000	1.14466667	10.40825471	0.661027
31	-0.00064539	9.09021850	-0.00586677		31.00000000	1.10774194	10.06961624	0.682611
32	0.00946664	9.08788390	0.08603175		32.00000000	1.07312500	9.75243541	0.703993
33	0.01934267	9.09044930	0.17583360		33.00000000	1.04060606	9.45957664	0.725373
34	0.02946430	9.09783550	0.26806139		34.00000000	1.01000000	9.18881386	0.746749
35	0.03930908	9.08767220	0.35722804		35.00000000	0.98114286	8.91630467	0.768228
36	0.04945006	9.08009340	0.44901115		36.00000000	0.95388889	8.66140020	0.789614
37	0.05925167	9.09036920	0.53861952		37.00000000	0.92810811	8.43684536	0.810957
38	0.06940307	9.10803790	0.63212576		38.00000000	0.90368421	8.23079004	0.832328
39	0.07956414	9.07424070	0.72198415		39.00000000	0.88051282	7.98998527	0.853817
40	0.08937245	9.09802910	0.81311314		40.00000000	0.85850000	7.81065798	0.875202
41	0.09953799	9.07844640	0.90365032		41.00000000	0.83756098	7.60375242	0.896545
42	0.10936267	9.08755870	0.99383968		42.00000000	0.81761905	7.43016109	0.917922
43	0.11949993	9.09868530	1.08729226		43.00000000	0.79860465	7.26625240	0.939400
44	0.12933949	9.09473130	1.17630791		44.00000000	0.78045455	7.09802438	0.960775
45	0.13945740	9.08765700	1.26734102		45.00000000	0.76311111	6.93489203	0.982129
46	0.14930217	9.10019870	1.35867941		46.00000000	0.74652174	6.79349616	1.003493
47	0.15946028	9.08302400	1.44838155		47.00000000	0.73063830	6.63640519	1.024968
48	0.16960795	9.10273360	1.54389599		48.00000000	0.71541667	6.51224733	1.046344
49	0.17937532	9.08043380	1.62880572		49.00000000	0.70081633	6.36371626	1.067708
50	0.18953045	9.09302430	1.72340499		50.00000000	0.68680000	6.24508909	1.089074
51	0.19933653	9.08674720	1.81132066		51.00000000	0.67333333	6.11840978	1.110546
52	0.20946634	9.09125710	1.90431235		52.00000000	0.66038462	6.00372632	1.131916
53	0.21930888	9.08558750	1.99255002		53.00000000	0.64792453	5.88677500	1.153298
54	0.22944018	9.08534910	2.08454413		54.00000000	0.63592593	5.77760904	1.174639
55	0.23923881	9.07278730	2.17056284		55.00000000	0.62436364	5.66471847	1.196106
56	0.24941477	9.08944800	2.26704258		56.00000000	0.61321429	5.57377936	1.217504
57	0.25954980	9.08646680	2.35839064		57.00000000	0.60245614	5.47419772	1.238894
58	0.26936108	9.09596350	2.45009855		58.00000000	0.59206897	5.38543770	1.260383
59	0.27949834	9.08405590	2.53897854		59.00000000	0.58203390	5.28722847	1.281762
60	0.28932229	9.09104630	2.63024233		60.00000000	0.57233333	5.20310883	1.303106
61	0.29947516	9.07813070	2.71867464		61.00000000	0.56295082	5.11054112	1.324489
62	0.30932441	9.08784200	2.81109136		62.00000000	0.55387097	5.03349184	1.345976
63	0.31944382	9.08378510	2.90175901		63.00000000	0.54507937	4.95138381	1.367348
64	0.32929453	9.09506890	2.99495644		64.00000000	0.53656250	4.88007291	1.388706
65	0.33941543	9.07933240	3.08166551		65.00000000	0.52830769	4.79668115	1.410081
66	0.34924084	9.09034540	3.17471986		66.00000000	0.52030303	4.72973426	1.431558
67	0.35937959	9.09377860	3.26811842		67.00000000	0.51253731	4.66090085	1.452938
68	0.36955258	9.08605480	3.35777499		68.00000000	0.50500000	4.58845767	1.474294
69	0.37937799	9.08799550	3.44778547		69.00000000	0.49768116	4.52292414	1.495665
70	0.38952121	9.09289740	3.54187640		70.00000000	0.49057143	4.46071567	1.517156
71	0.39935109	9.06779860	3.62123525		71.00000000	0.48366197	4.38574935	1.538526
72	0.40949729	9.10180760	3.72716555		72.00000000	0.47694444	4.34105657	1.559882
73	0.41932273	9.07312770	3.80456868		73.00000000	0.47041096	4.26809870	1.581265
74	0.42944211	9.08036230	3.89948995		74.00000000	0.46405405	4.21377894	1.602745
75	0.43929061	9.07917590	3.98839672		75.00000000	0.45786667	4.15705201	1.624135
76	0.44943607	9.07914260	4.08049417		76.00000000	0.45184211	4.10233891	1.645472
77	0.45955992	9.08076290	4.17315467		77.00000000	0.44597403	4.04978439	1.666842
78	0.46945977	9.07242010	4.25913625		78.00000000	0.44025641	3.99419111	1.688312
79	0.47955981	9.06901360	4.34913444		79.00000000	0.43468354	3.94215097	1.709681
80	0.48939490	9.06171700	4.43475809		80.00000000	0.42925000	3.88974202	1.731060
81	0.49954408	9.05359940	4.52267198		81.00000000	0.42395062	3.83827905	1.752429
82	0.50937027	9.04853820	4.60905635		82.00000000	0.41878049	3.78935124	1.773904
83	0.51952833	9.01612760	4.68413372		83.00000000	0.41373494	3.73028701	1.795269
84	0.52928305	8.98783490	4.75710867		84.00000000	0.40880952	3.67431251	1.816647
85	0.53939724	8.94659610	4.82576924		85.00000000	0.40400000	3.61442482	1.837992
86	0.54956877	8.89406870	4.88790240		86.00000000	0.39930233	3.55142232	1.859512
87	0.55937707	8.80246930	4.92389949		87.00000000	0.39471264	3.47444593	1.880880
88	0.56952548	8.68697930	4.94745606		88.00000000	0.39022727	3.38989624	1.902252
89	0.57933825	8.52283950	4.93760692		89.00000000	0.38584270	3.28847538	1.923727
90	0.58945763	8.28055760	4.88103786		90.00000000	0.38155556	3.15949276	1.945094
91	0.59926075	7.96111820	4.77078566		91.00000000	0.37736264	3.00422856	1.966436
92	0.60935485	7.50588990	4.57375041		92.00000000	0.37326087	2.80165499	1.987902
93	0.61918843	6.93227150	4.29238231		93.00000000	0.36924731	2.55972262	2.009402
94	0.62930638	6.10911460	3.84450479		94.00000000	0.36531915	2.23177655	2.030778
95	0.63939971	5.05067440	3.22939975		95.00000000	0.36147368	1.82568588	2.052138
96	0.64917380	3.74236110	2.42944278		96.00000000	0.35770833	1.33867375	2.073508
97	0.65929687	2.04565120	1.34869143		97.00000000	0.35402062	0.72420270	2.095022
98	0.66897494	0.02186939	0.01463008		98.00000000	0.35040816	0.00766321	2.116424
99	0.67909509	-2.47940610	-1.68375251		99.00000000	0.34686869	-0.86002834	2.137777
100	0.68879998	-5.35291670	-3.68708892		100.00000000	0.34340000	-1.83819159	2.159148
101	0.69911432	-8.86512570	-6.19773633		101.00000000	0.34000000	-3.01414274	2.180634
00:49 04/04/2018
Test Lot:	JK-PERC
Recipe:	Recipe_YJX-LID
Cell Name:	3-8-2h
Test Order:	2
Test Condition:	Light
1	-0.29990101	9.10010810	-2.72913161		1.00000000	34.34000000	312.49771215	0.000000
2	-0.29012573	9.08580300	-2.63602523		2.00000000	17.17000000	156.00323751	0.061776
3	-0.27997530	9.09891030	-2.54747014		3.00000000	11.44666667	104.15219323	0.083196
4	-0.27013898	9.09916690	-2.45803967		4.00000000	8.58500000	78.11634784	0.104684
5	-0.26000121	9.09967610	-2.36592680		5.00000000	6.86800000	62.49657545	0.126070
6	-0.24980839	9.09557250	-2.27215032		6.00000000	5.72333333	52.05699328	0.147445
7	-0.23999512	9.09565930	-2.18291385		7.00000000	4.90571429	44.62070577	0.168824
8	-0.22987671	9.09586810	-2.09092823		8.00000000	4.29250000	39.04401382	0.190294
9	-0.22001062	9.08981800	-1.99985649		9.00000000	3.81555556	34.68270557	0.211732
10	-0.20986691	9.09077640	-1.90785315		10.00000000	3.43400000	31.21772616	0.233101
11	-0.20004323	9.10251810	-1.82089712		11.00000000	3.12181818	28.41640650	0.254479
12	-0.18992482	9.08942600	-1.72630760		12.00000000	2.86166667	26.01090740	0.275981
13	-0.18016812	9.09700300	-1.63898993		13.00000000	2.64153846	24.03008331	0.297356
14	-0.17001027	9.09734150	-1.54664148		14.00000000	2.45285714	22.31447908	0.318694
15	-0.16019851	9.09931560	-1.45769680		15.00000000	2.28933333	20.83136651	0.340074
16	-0.15002948	9.09410570	-1.36438395		16.00000000	2.14625000	19.51822436	0.361550
17	-0.13987237	9.09892370	-1.27268802		17.00000000	2.02000000	18.37982587	0.382929
18	-0.13003455	9.09540080	-1.18271635		18.00000000	1.90777778	17.35200353	0.404275
19	-0.11992359	9.09409050	-1.09059598		19.00000000	1.80736842	16.43637199	0.425640
20	-0.11007237	9.09417720	-1.00101764		20.00000000	1.71700000	15.61470225	0.447115
21	-0.09992941	9.09760190	-0.90911796		21.00000000	1.63523810	14.87674520	0.468485
22	-0.09013476	9.09906200	-0.82014179		22.00000000	1.56090909	14.20280859	0.489842
23	-0.07998956	9.08981990	-0.72709069		23.00000000	1.49304348	13.57149632	0.511217
24	-0.07012346	9.10653690	-0.63858184		24.00000000	1.43083333	13.02993655	0.532681
25	-0.05998793	9.08433910	-0.54495069		25.00000000	1.37360000	12.47824819	0.554066
26	-0.04983752	9.08904550	-0.45297547		26.00000000	1.32076923	12.00453163	0.575461
27	-0.04002129	9.10223290	-0.36428306		27.00000000	1.27185185	11.57669177	0.596806
28	-0.02985301	9.09190940	-0.27142085		28.00000000	1.22642857	11.15057746	0.618279
29	-0.02002115	9.09579940	-0.18210833		29.00000000	1.18413793	10.77068108	0.639664
30	-0.00988190	9.09634880	-0.08988918		30.00000000	1.14466667	10.41228726	0.661051
31	-0.00063578	9.09433940	-0.00578198		31.00000000	1.10774194	10.07418113	0.682653
32	0.00948242	9.08559420	0.08615345		32.00000000	1.07312500	9.74997828	0.704056
33	0.01934080	9.09904000	0.17598269		33.00000000	1.04060606	9.46851617	0.725395
34	0.02948125	9.09022520	0.26799117		34.00000000	1.01000000	9.18112745	0.746776
35	0.03930167	9.09442900	0.35742622		35.00000000	0.98114286	8.92293405	0.768265
36	0.04944137	9.08777520	0.44931207		36.00000000	0.95388889	8.66872779	0.789694
37	0.05927593	9.09101680	0.53887847		37.00000000	0.92810811	8.43744640	0.811074
38	0.06939182	9.09676740	0.63124122		38.00000000	0.90368421	8.22060507	0.832454
39	0.07955534	9.09851840	0.72383572		39.00000000	0.88051282	8.01136210	0.853931
40	0.08936757	9.09214970	0.81254331		40.00000000	0.85850000	7.80561052	0.875313
41	0.09950504	9.08841130	0.90434270		41.00000000	0.83756098	7.61209864	0.896663
42	0.10930537	9.09893700	0.99456268		42.00000000	0.81761905	7.43946420	0.918029
43	0.11949866	9.08021070	1.08507301		43.00000000	0.79860465	7.25149850	0.939512
44	0.12931982	9.09804250	1.17655722		44.00000000	0.78045455	7.10060862	0.960889
45	0.13945356	9.09840300	1.26880469		45.00000000	0.76311111	6.94309242	0.982239
46	0.14925538	9.08456420	1.35592008		46.00000000	0.74652174	6.78182467	1.003609
47	0.15938912	9.10383030	1.45105150		47.00000000	0.73063830	6.65160707	1.025099
48	0.16958019	9.08629700	1.54085597		48.00000000	0.71541667	6.50048831	1.046479
49	0.17936935	9.10057930	1.63236499		49.00000000	0.70081633	6.37783455	1.067836
50	0.18951650	9.08786580	1.72230052		50.00000000	0.68680000	6.24154623	1.089211
51	0.19932203	9.09176060	1.81218818		51.00000000	0.67333333	6.12178547	1.110683
52	0.20945057	9.09789370	1.90555902		52.00000000	0.66038462	6.00810903	1.132055
53	0.21925387	9.08966450	1.99294412		53.00000000	0.64792453	5.88941658	1.153425
54	0.22938687	9.10802360	2.08926103		54.00000000	0.63592593	5.79202834	1.174787
55	0.23924674	9.08812430	2.17430411		55.00000000	0.62436364	5.67429434	1.196264
56	0.24940282	9.10190110	2.27003980		56.00000000	0.61321429	5.58141578	1.217638
57	0.25953433	9.08156870	2.35697885		57.00000000	0.60245614	5.47124683	1.239025
58	0.26936740	9.11370280	2.45493443		58.00000000	0.59206897	5.39594059	1.260370
59	0.27950412	9.09197900	2.54124559		59.00000000	0.58203390	5.29183998	1.281839
60	0.28932232	9.09956460	2.63270714		60.00000000	0.57233333	5.20798414	1.303204
61	0.29948136	9.08934780	2.72209024		61.00000000	0.56295082	5.11685579	1.324573
62	0.30926085	9.09595110	2.81302157		62.00000000	0.55387097	5.03798324	1.346057
63	0.31946233	9.09767530	2.90636455		63.00000000	0.54507937	4.95895508	1.367435
64	0.32929018	9.08876040	2.99283955		64.00000000	0.53656250	4.87668800	1.388781
65	0.33939493	9.10074620	3.08874712		65.00000000	0.52830769	4.80799422	1.410158
66	0.34924808	9.09270860	3.17561102		66.00000000	0.52030303	4.73096384	1.431636
67	0.35940194	9.10009190	3.27059068		67.00000000	0.51253731	4.66413665	1.453016
68	0.36955652	9.10533710	3.36493669		68.00000000	0.50500000	4.59819524	1.474382
69	0.37935236	9.09016510	3.44837558		69.00000000	0.49768116	4.52400391	1.495752
70	0.38949877	9.09396840	3.54208951		70.00000000	0.49057143	4.46124107	1.517244
71	0.39936310	9.08906360	3.62983662		71.00000000	0.48366197	4.39603442	1.538621
72	0.40949166	9.09833430	3.72569202		72.00000000	0.47694444	4.33940000	1.559958
73	0.41932100	9.09092140	3.81201425		73.00000000	0.47041096	4.27646905	1.581325
74	0.42946070	9.08828260	3.90306021		74.00000000	0.46405405	4.21745438	1.602813
75	0.43929228	9.08341790	3.99027536		75.00000000	0.45786667	4.15899428	1.624182
76	0.44944909	9.08158590	4.08171052		76.00000000	0.45184211	4.10344289	1.645544
77	0.45956275	9.06824300	4.16742669		77.00000000	0.44597403	4.04420084	1.666919
78	0.46944720	9.08644010	4.26560386		78.00000000	0.44025641	4.00036350	1.688388
79	0.47956902	9.06563950	4.34759985		79.00000000	0.43468354	3.94068431	1.709777
80	0.48936936	9.07151030	4.43931919		80.00000000	0.42925000	3.89394580	1.731124
81	0.49951202	9.05660920	4.52388516		81.00000000	0.42395062	3.83955506	1.752500
82	0.50929302	9.02107910	4.59437262		82.00000000	0.41878049	3.77785191	1.773977
83	0.51946545	9.03393550	4.69281737		83.00000000	0.41373494	3.73765476	1.795351
84	0.52922857	8.98645310	4.75588772		84.00000000	0.40880952	3.67374761	1.816713
85	0.53936678	8.94312100	4.82362238		85.00000000	0.40400000	3.61302088	1.838084
86	0.54952437	8.87435630	4.87667505		86.00000000	0.39930233	3.54355111	1.859555
87	0.55935669	8.79869270	4.92160762		87.00000000	0.39471264	3.47295526	1.880932
88	0.56945693	8.64738460	4.92431309		88.00000000	0.39022727	3.37444531	1.902325
89	0.57930118	8.52120880	4.93634631		89.00000000	0.38584270	3.28784618	1.923668
90	0.58943641	8.24818130	4.86177837		90.00000000	0.38155556	3.14713940	1.945142
91	0.59923005	7.93715290	4.75618053		91.00000000	0.37736264	2.99518495	1.966519
92	0.60937047	7.48122600	4.55883820		92.00000000	0.37326087	2.79244892	1.987994
93	0.61914027	6.87754960	4.25816792		93.00000000	0.36924731	2.53951670	2.009501
94	0.62926584	6.06943370	3.81928730		94.00000000	0.36531915	2.21728035	2.030895
95	0.63937879	5.00489710	3.20002505		95.00000000	0.36147368	1.80913859	2.052246
96	0.64916497	3.69323400	2.39751814		96.00000000	0.35770833	1.32110058	2.073628
97	0.65919673	1.98020920	1.30534743		97.00000000	0.35402062	0.70103489	2.095114
98	0.66901046	-0.02430282	-0.01625884		98.00000000	0.35040816	-0.00851591	2.116482
99	0.67909360	-2.51759620	-1.70968347		99.00000000	0.34686869	-0.87327529	2.137844
100	0.68878525	-5.39261870	-3.71435622		100.00000000	0.34340000	-1.85182526	2.159221
101	0.69909686	-8.90470310	-6.22524998		101.00000000	0.34000000	-3.02759905	2.180699
