# Supplementary material for: Study on the Electrical Injection Regeneration of Industrialized B-Doped Czochralski Silicon PERC Solar Cells
Source: Hindawi journal article supplement (doi:10.1155/2019/5357370), 2019-06-20
Supplement: f1 [file 5357370.f1.zip › section3.3/IVRawData_3-8-3h.csv]

01:51 04/04/2018
Test Lot:	JK-PERC
Recipe:	Recipe_YJX-LID
Cell Name:	3-8-3h
Test Order:	2
Test Condition:	Light
1	-0.29990530	9.10696790	-2.73122794		1.00000000	34.34000000	312.73327769	0.000000
2	-0.29014584	9.10799410	-2.64264660		2.00000000	17.17000000	156.38425870	0.061785
3	-0.27997854	9.10230160	-2.54844911		3.00000000	11.44666667	104.19101231	0.083205
4	-0.27016553	9.12488370	-2.46522904		4.00000000	8.58500000	78.33712656	0.104692
5	-0.26002055	9.11230370	-2.36938622		5.00000000	6.86800000	62.58330181	0.126081
6	-0.24985623	9.11073300	-2.27637340		6.00000000	5.72333333	52.14376187	0.147438
7	-0.24003129	9.11285590	-2.18737056		7.00000000	4.90571429	44.70506737	0.168815
8	-0.22989227	9.10550310	-2.09328478		8.00000000	4.29250000	39.08537206	0.190295
9	-0.22004500	9.11142730	-2.00492402		9.00000000	3.81555556	34.76515705	0.211684
10	-0.20992385	9.09571930	-1.90940841		10.00000000	3.43400000	31.23470008	0.233100
11	-0.20010337	9.10782430	-1.82250634		11.00000000	3.12181818	28.43297150	0.254493
12	-0.18993011	9.10764410	-1.72981585		12.00000000	2.86166667	26.06304153	0.275977
13	-0.18015206	9.10129550	-1.63961713		13.00000000	2.64153846	24.04142211	0.297341
14	-0.17002198	9.11389260	-1.54956207		14.00000000	2.45285714	22.35507656	0.318728
15	-0.16018140	9.11419300	-1.45992419		15.00000000	2.28933333	20.86542584	0.340068
16	-0.15006398	9.09681420	-1.36510414		16.00000000	2.14625000	19.52403748	0.361546
17	-0.13988477	9.11179640	-1.27460154		17.00000000	2.02000000	18.40582873	0.382926
18	-0.13007769	9.11037450	-1.18505647		18.00000000	1.90777778	17.38057002	0.404308
19	-0.11988583	9.10402110	-1.09144313		19.00000000	1.80736842	16.45432024	0.425786
20	-0.11006833	9.10936930	-1.00265307		20.00000000	1.71700000	15.64078709	0.447149
21	-0.09992857	9.11108020	-0.91045724		21.00000000	1.63523810	14.89878543	0.468489
22	-0.09008204	9.11300280	-0.82091790		22.00000000	1.56090909	14.22456892	0.489873
23	-0.07994973	9.10503390	-0.72794499		23.00000000	1.49304348	13.59421148	0.511364
24	-0.07013967	9.11164570	-0.63908781		24.00000000	1.43083333	13.03724639	0.532737
25	-0.06000140	9.10744000	-0.54645914		25.00000000	1.37360000	12.50997958	0.554087
26	-0.04981475	9.10995670	-0.45381022		26.00000000	1.32076923	12.03215050	0.575464
27	-0.04004414	9.10637860	-0.36465706		27.00000000	1.27185185	11.58196449	0.596930
28	-0.02991405	9.11326310	-0.27261462		28.00000000	1.22642857	11.17676624	0.618305
29	-0.02007125	9.10676770	-0.18278420		29.00000000	1.18413793	10.78366906	0.639663
30	-0.00988981	9.10210510	-0.09001808		30.00000000	1.14466667	10.41887630	0.661041
31	-0.00063125	9.11191460	-0.00575188		31.00000000	1.10774194	10.09364991	0.682638
32	0.00950086	9.09951780	0.08645327		32.00000000	1.07312500	9.76492004	0.704018
33	0.01932776	9.10952470	0.17606667		33.00000000	1.04060606	9.47942661	0.725375
34	0.02943300	9.10201840	0.26789966		34.00000000	1.01000000	9.19303858	0.746751
35	0.03927105	9.09693150	0.35724608		35.00000000	0.98114286	8.92538936	0.768229
36	0.04937480	9.11185460	0.44989600		36.00000000	0.95388889	8.69169686	0.789624
37	0.05918234	9.10128690	0.53863547		37.00000000	0.92810811	8.44697817	0.810974
38	0.06936573	9.10618210	0.63165692		38.00000000	0.90368421	8.22911298	0.832350
39	0.07949850	9.10634230	0.72394055		39.00000000	0.88051282	8.01825114	0.853817
40	0.08931796	9.10423090	0.81317129		40.00000000	0.85850000	7.81598223	0.875183
41	0.09948719	9.12149430	0.90747186		41.00000000	0.83756098	7.63980766	0.896545
42	0.10928581	9.08843800	0.99323731		42.00000000	0.81761905	7.43088002	0.917907
43	0.11944984	9.12008760	1.08939300		43.00000000	0.79860465	7.28334438	0.939395
44	0.12929162	9.10049250	1.17661742		44.00000000	0.78045455	7.10252074	0.960785
45	0.13937378	9.10676770	1.26924464		45.00000000	0.76311111	6.94947562	0.982166
46	0.14926766	9.10245700	1.35870246		46.00000000	0.74652174	6.79518203	1.003523
47	0.15941606	9.11096000	1.45243335		47.00000000	0.73063830	6.65681631	1.024995
48	0.16951907	9.10693930	1.54379988		48.00000000	0.71541667	6.51525616	1.046372
49	0.17939508	9.10821150	1.63396833		49.00000000	0.70081633	6.38318332	1.067751
50	0.18951595	9.10926440	1.72635090		50.00000000	0.68680000	6.25624279	1.089226
51	0.19929223	9.11263080	1.81607651		51.00000000	0.67333333	6.13583807	1.110591
52	0.20940641	9.09261890	1.90405268		52.00000000	0.66038462	6.00462564	1.131942
53	0.21926008	9.10342500	1.99601769		53.00000000	0.64792453	5.89833235	1.153316
54	0.22937946	9.10273270	2.08797991		54.00000000	0.63592593	5.78866372	1.174786
55	0.23926961	9.10344310	2.17817728		55.00000000	0.62436364	5.68385884	1.196151
56	0.24940537	9.10323620	2.27039599		56.00000000	0.61321429	5.58223448	1.217512
57	0.25952548	9.09293940	2.35984946		57.00000000	0.60245614	5.47809718	1.238893
58	0.26931891	9.10566620	2.45232810		58.00000000	0.59206897	5.39118237	1.260366
59	0.27946877	9.09691810	2.54230451		59.00000000	0.58203390	5.29471470	1.281751
60	0.28930014	9.10823820	2.63501459		60.00000000	0.57233333	5.21294833	1.303099
61	0.29946938	9.09675600	2.72419988		61.00000000	0.56295082	5.12102625	1.324481
62	0.30926725	9.10811140	2.81684057		62.00000000	0.55387097	5.04471848	1.345952
63	0.31945658	9.08801460	2.90322606		63.00000000	0.54507937	4.95368923	1.367316
64	0.32925370	9.11431980	3.00092352		64.00000000	0.53656250	4.89040222	1.388676
65	0.33939692	9.11270240	3.09282313		65.00000000	0.52830769	4.81431078	1.410043
66	0.34919327	9.10487170	3.17935992		66.00000000	0.52030303	4.73729234	1.431520
67	0.35937667	9.09630010	3.26899804		67.00000000	0.51253731	4.66219322	1.452899
68	0.36953178	9.09086320	3.35936286		68.00000000	0.50500000	4.59088592	1.474245
69	0.37935123	9.10823630	3.45522064		69.00000000	0.49768116	4.53299760	1.495625
70	0.38949069	9.09757710	3.54342158		70.00000000	0.49057143	4.46301139	1.517111
71	0.39930642	9.10389710	3.63524456		71.00000000	0.48366197	4.40320882	1.538489
72	0.40944591	9.09845640	3.72532576		72.00000000	0.47694444	4.33945823	1.559853
73	0.41925865	9.10928630	3.81914708		73.00000000	0.47041096	4.28510810	1.581222
74	0.42942342	9.09687420	3.90641083		74.00000000	0.46405405	4.22144135	1.602688
75	0.43924809	9.10029890	3.99728891		75.00000000	0.45786667	4.16672352	1.624072
76	0.44938311	9.09281060	4.08615551		76.00000000	0.45184211	4.10851468	1.645460
77	0.45955086	9.09748840	4.18075862		77.00000000	0.44597403	4.05724353	1.666801
78	0.46939710	9.08744720	4.26562136		78.00000000	0.44025641	4.00080688	1.688264
79	0.47955292	9.07361320	4.35127771		79.00000000	0.43468354	3.94415035	1.709632
80	0.48931584	9.06970980	4.43795267		80.00000000	0.42925000	3.89317293	1.731016
81	0.49948880	9.05026720	4.52050710		81.00000000	0.42395062	3.83686637	1.752488
82	0.50931269	9.05141160	4.60999879		82.00000000	0.41878049	3.79055457	1.773869
83	0.51946706	9.01092910	4.68088085		83.00000000	0.41373494	3.72813621	1.795206
84	0.52922249	9.00651360	4.76644955		84.00000000	0.40880952	3.68194854	1.816593
85	0.53935754	8.94565200	4.82490486		85.00000000	0.40400000	3.61404341	1.838075
86	0.54950297	8.88200000	4.88068538		86.00000000	0.39930233	3.54660326	1.859438
87	0.55935365	8.80860810	4.92712709		87.00000000	0.39471264	3.47686899	1.880804
88	0.56947899	8.67707350	4.94141105		88.00000000	0.39022727	3.38603073	1.902171
89	0.57927388	8.50331020	4.92574549		89.00000000	0.38584270	3.28094014	1.923660
90	0.58940369	8.27270790	4.87596456		90.00000000	0.38155556	3.15649766	1.945032
91	0.59923130	7.94063140	4.75827488		91.00000000	0.37736264	2.99649761	1.966374
92	0.60931796	7.49259470	4.56537252		92.00000000	0.37326087	2.79669241	1.987848
93	0.61912549	6.89496090	4.26884605		93.00000000	0.36924731	2.54594578	2.009354
94	0.62921512	6.07156990	3.82032358		94.00000000	0.36531915	2.21806075	2.030744
95	0.63935977	5.02084780	3.21012809		95.00000000	0.36147368	1.81490435	2.052115
96	0.64917850	3.69988750	2.40188742		96.00000000	0.35770833	1.32348059	2.073488
97	0.65921974	2.01092510	1.32564152		97.00000000	0.35402062	0.71190895	2.094962
98	0.66898185	-0.01247298	-0.00834420		98.00000000	0.35040816	-0.00437063	2.116338
99	0.67905360	-2.50564100	-1.70146454		99.00000000	0.34686869	-0.86912840	2.137693
100	0.68872422	-5.37357040	-3.70090808		100.00000000	0.34340000	-1.84528408	2.159069
101	0.69904083	-8.86475850	-6.19682814		101.00000000	0.34000000	-3.01401789	2.180548
01:51 04/04/2018
Test Lot:	JK-PERC
Recipe:	Recipe_YJX-LID
Cell Name:	3-8-3h
Test Order:	3
Test Condition:	Light
1	-0.29993805	9.10557650	-2.73110886		1.00000000	34.34000000	312.68549701	0.000000
2	-0.29008335	9.10949990	-2.64251425		2.00000000	17.17000000	156.41011328	0.021573
3	-0.27993539	9.11519430	-2.55166547		3.00000000	11.44666667	104.33859075	0.043015
4	-0.27012235	9.10506060	-2.45948037		4.00000000	8.58500000	78.16694525	0.064383
5	-0.25999525	9.10991380	-2.36853432		5.00000000	6.86800000	62.56688798	0.085767
6	-0.24979147	9.11164570	-2.27601137		6.00000000	5.72333333	52.14898556	0.107249
7	-0.24001268	9.10495190	-2.18530391		7.00000000	4.90571429	44.66629261	0.128623
8	-0.22986250	9.10775090	-2.09353039		8.00000000	4.29250000	39.09502074	0.149978
9	-0.22006436	9.10109040	-2.00282563		9.00000000	3.81555556	34.72571604	0.171348
10	-0.20986281	9.10729030	-1.91128153		10.00000000	3.43400000	31.27443489	0.192834
11	-0.20005202	9.10290910	-1.82105535		11.00000000	3.12181818	28.41762714	0.214231
12	-0.18990110	9.11292270	-1.73055404		12.00000000	2.86166667	26.07814713	0.235579
13	-0.18014537	9.10487560	-1.64020118		13.00000000	2.64153846	24.05087908	0.256957
14	-0.16999072	9.10033610	-1.54697269		14.00000000	2.45285714	22.32182441	0.278437
15	-0.16015090	9.10678770	-1.45846025		15.00000000	2.28933333	20.84847264	0.299801
16	-0.15001410	9.11408620	-1.36724144		16.00000000	2.14625000	19.56110751	0.321166
17	-0.13986392	9.10241510	-1.27309946		17.00000000	2.02000000	18.38687850	0.342533
18	-0.13007620	9.10283760	-1.18406252		18.00000000	1.90777778	17.36619129	0.364011
19	-0.11989997	9.10643580	-1.09186138		19.00000000	1.80736842	16.45868449	0.385400
20	-0.11007652	9.09433270	-1.00107250		20.00000000	1.71700000	15.61496925	0.406772
21	-0.09986531	9.11681270	-0.91045333		21.00000000	1.63523810	14.90815943	0.428115
22	-0.09010437	9.09422110	-0.81942907		22.00000000	1.56090909	14.19525239	0.449603
23	-0.08001597	9.11459830	-0.72931338		23.00000000	1.49304348	13.60849155	0.470985
24	-0.07017689	9.08980660	-0.63789431		24.00000000	1.43083333	13.00599828	0.492366
25	-0.05999842	9.11808780	-0.54707085		25.00000000	1.37360000	12.52460540	0.513778
26	-0.04982963	9.10926910	-0.45391153		26.00000000	1.32076923	12.03124234	0.535246
27	-0.04001362	9.10557460	-0.36434702		27.00000000	1.27185185	11.58094192	0.556628
28	-0.02991182	9.11289410	-0.27258325		28.00000000	1.22642857	11.17631369	0.578004
29	-0.02004073	9.09706780	-0.18231192		29.00000000	1.18413793	10.77218304	0.599359
30	-0.00989725	9.10158060	-0.09008063		30.00000000	1.14466667	10.41827593	0.620837
31	-0.00065953	9.10162070	-0.00600279		31.00000000	1.10774194	10.08224693	0.642335
32	0.00941751	9.10544300	0.08575059		32.00000000	1.07312500	9.77127852	0.663693
33	0.01930543	9.10965630	0.17586583		33.00000000	1.04060606	9.47956356	0.685075
34	0.02943969	9.10749530	0.26812187		34.00000000	1.01000000	9.19857025	0.706564
35	0.03929040	9.10194780	0.35761919		35.00000000	0.98114286	8.93031107	0.727941
36	0.04943880	9.10254380	0.45001888		36.00000000	0.95388889	8.68281539	0.749330
37	0.05920393	9.10158250	0.53884942		37.00000000	0.92810811	8.44725251	0.770674
38	0.06933819	9.11330320	0.63189993		38.00000000	0.90368421	8.23554821	0.792160
39	0.07952753	9.10789590	0.72432844		39.00000000	0.88051282	8.01961911	0.813551
40	0.08936484	9.10218330	0.81341517		40.00000000	0.85850000	7.81422436	0.834936
41	0.09953557	9.10673430	0.90644399		41.00000000	0.83756098	7.62744526	0.856407
42	0.10929251	9.09473510	0.99398643		42.00000000	0.81761905	7.43602865	0.877797
43	0.11946770	9.10690310	1.08798077		43.00000000	0.79860465	7.27281517	0.899153
44	0.12928045	9.10097500	1.17657814		44.00000000	0.78045455	7.10289731	0.920528
45	0.13947053	9.10414600	1.26976007		45.00000000	0.76311111	6.94747497	0.942011
46	0.14929147	9.11043930	1.36011088		46.00000000	0.74652174	6.80114099	0.963380
47	0.15939076	9.10249710	1.45085393		47.00000000	0.73063830	6.65063299	0.984738
48	0.16953619	9.10762020	1.54407123		48.00000000	0.71541667	6.51574328	1.006108
49	0.17938615	9.10468670	1.63325469		49.00000000	0.70081633	6.38071309	1.027579
50	0.18952785	9.11992360	1.72847951		50.00000000	0.68680000	6.26356353	1.048966
51	0.19930562	9.10513210	1.81470400		51.00000000	0.67333333	6.13078895	1.070380
52	0.20945999	9.09846310	1.90576399		52.00000000	0.66038462	6.00848505	1.091769
53	0.21925190	9.11277770	1.99799383		53.00000000	0.64792453	5.90439219	1.113268
54	0.22942188	9.09183790	2.08586654		54.00000000	0.63592593	5.78173543	1.134640
55	0.23924506	9.11049940	2.17964198		55.00000000	0.62436364	5.68826453	1.155980
56	0.24939495	9.09219170	2.26754669		56.00000000	0.61321429	5.57546184	1.177360
57	0.25951135	9.11074160	2.36434085		57.00000000	0.60245614	5.48882222	1.198843
58	0.26936802	9.10035230	2.45134388		58.00000000	0.59206897	5.38803617	1.220234
59	0.27951568	9.11492730	2.54776510		59.00000000	0.58203390	5.30519667	1.241577
60	0.28931132	9.10223200	2.63337875		60.00000000	0.57233333	5.20951078	1.262951
61	0.29946268	9.10766890	2.72740694		61.00000000	0.56295082	5.12716967	1.284427
62	0.30930597	9.09408570	2.81285500		62.00000000	0.55387097	5.03695005	1.305813
63	0.31947595	9.10585020	2.90910014		63.00000000	0.54507937	4.96341105	1.327172
64	0.32927233	9.09198760	2.99373994		64.00000000	0.53656250	4.87841960	1.348547
65	0.33940956	9.10252380	3.08948360		65.00000000	0.52830769	4.80893334	1.370040
66	0.34925804	9.11450290	3.18331342		66.00000000	0.52030303	4.74230348	1.391416
67	0.35939378	9.09068110	3.26713424		67.00000000	0.51253731	4.65931327	1.412812
68	0.36951688	9.11755370	3.36909000		68.00000000	0.50500000	4.60436462	1.434164
69	0.37936535	9.08753870	3.44749730		69.00000000	0.49768116	4.52269680	1.455640
70	0.38947359	9.10997200	3.54809350		70.00000000	0.49057143	4.46909198	1.477034
71	0.39932504	9.09281060	3.63098696		71.00000000	0.48366197	4.39784670	1.498415
72	0.40948161	9.10878180	3.72987864		72.00000000	0.47694444	4.34438288	1.519899
73	0.41926834	9.08479020	3.80896491		73.00000000	0.47041096	4.27358487	1.541286
74	0.42944872	9.10326000	3.90938335		74.00000000	0.46405405	4.22440471	1.562642
75	0.43926668	9.09216500	3.99388513		75.00000000	0.45786667	4.16299928	1.584025
76	0.44944113	9.09389400	4.08717000		76.00000000	0.45184211	4.10900421	1.605496
77	0.45954788	9.08411220	4.17458450		77.00000000	0.44597403	4.05127809	1.626873
78	0.46937850	9.09165570	4.26742771		78.00000000	0.44025641	4.00265970	1.648229
79	0.47953060	9.08080480	4.35452377		79.00000000	0.43468354	3.94727642	1.669603
80	0.48935974	9.07159230	4.43927205		80.00000000	0.42925000	3.89398099	1.691078
81	0.49949327	9.05672260	4.52377199		81.00000000	0.42395062	3.83960314	1.712462
82	0.50930232	9.05004690	4.60920988		82.00000000	0.41878049	3.78998306	1.733805
83	0.51945591	9.02429390	4.68772280		83.00000000	0.41373494	3.73366569	1.755171
84	0.52925152	8.99091910	4.75845760		84.00000000	0.40880952	3.67557336	1.776652
85	0.53940141	8.95971580	4.83288334		85.00000000	0.40400000	3.61972518	1.798031
86	0.54953641	8.88308430	4.88157826		86.00000000	0.39930233	3.54703622	1.819388
87	0.55934769	8.80585770	4.92553616		87.00000000	0.39471264	3.47578337	1.840760
88	0.56948268	8.67958350	4.94287247		88.00000000	0.39022727	3.38701020	1.862235
89	0.57929176	8.51487260	4.93259553		89.00000000	0.38584270	3.28540141	1.883611
90	0.58939624	8.26839830	4.87336287		90.00000000	0.38155556	3.15485331	1.904957
91	0.59922236	7.94885830	4.76313363		91.00000000	0.37736264	2.99960213	1.926325
92	0.60932541	7.49210260	4.56512849		92.00000000	0.37326087	2.79650873	1.947802
93	0.61914933	6.90215540	4.27346489		93.00000000	0.36924731	2.54860233	1.969176
94	0.62927020	6.08710910	3.83043636		94.00000000	0.36531915	2.22373752	1.990642
95	0.63933820	5.03251500	3.21747908		95.00000000	0.36147368	1.81912174	2.012054
96	0.64917922	3.69556380	2.39908323		96.00000000	0.35770833	1.32193397	2.033589
97	0.65922123	2.00744680	1.32335155		97.00000000	0.35402062	0.71067756	2.054976
98	0.66893202	-0.01570399	-0.01050490		98.00000000	0.35040816	-0.00550281	2.076369
99	0.67906773	-2.52148680	-1.71226032		99.00000000	0.34686869	-0.87462482	2.097717
100	0.68876588	-5.41552690	-3.73003015		100.00000000	0.34340000	-1.85969194	2.119195
101	0.69896936	-8.91304110	-6.22994263		101.00000000	0.34000000	-3.03043397	2.140578
01:52 04/04/2018
Test Lot:	JK-PERC
Recipe:	Recipe_YJX-LID
Cell Name:	3-8-3h
Test Order:	4
Test Condition:	Light
1	-0.29990575	9.10855670	-2.73170853		1.00000000	34.34000000	312.78783708	0.000000
2	-0.29008141	9.11216450	-2.64326953		2.00000000	17.17000000	156.45586447	0.061812
3	-0.27995116	9.11061950	-2.55052850		3.00000000	11.44666667	104.28622454	0.083238
4	-0.27011710	9.10538100	-2.45951911		4.00000000	8.58500000	78.16969589	0.104728
5	-0.25995860	9.10896870	-2.36795475		5.00000000	6.86800000	62.56039703	0.126097
6	-0.24980155	9.10299780	-2.27394296		6.00000000	5.72333333	52.09949074	0.147459
7	-0.24000993	9.09749890	-2.18349007		7.00000000	4.90571429	44.62973032	0.168826
8	-0.22985512	9.11149690	-2.09432421		8.00000000	4.29250000	39.11110044	0.190312
9	-0.21999727	9.09718990	-2.00135694		9.00000000	3.81555556	34.71083346	0.211706
10	-0.20987892	9.10539440	-1.91103034		10.00000000	3.43400000	31.26792437	0.233045
11	-0.20009178	9.10075090	-1.82098545		11.00000000	3.12181818	28.41088963	0.254423
12	-0.18993846	9.10526560	-1.72944013		12.00000000	2.86166667	26.05623506	0.275899
13	-0.18015504	9.10652730	-1.64058679		13.00000000	2.64153846	24.05524211	0.297290
14	-0.16999874	9.11488530	-1.54951902		14.00000000	2.45285714	22.35751151	0.318632
15	-0.16016395	9.10277560	-1.45793650		15.00000000	2.28933333	20.83928761	0.340006
16	-0.15004189	9.10422230	-1.36601472		16.00000000	2.14625000	19.53993711	0.361494
17	-0.13990495	9.09940910	-1.27305238		17.00000000	2.02000000	18.38080638	0.382866
18	-0.13007389	9.10285090	-1.18404323		18.00000000	1.90777778	17.36621666	0.404229
19	-0.11993843	9.10924240	-1.09254823		19.00000000	1.80736842	16.46375705	0.425601
20	-0.11008654	9.09564110	-1.00130766		20.00000000	1.71700000	15.61721577	0.447073
21	-0.09993917	9.09858990	-0.90930550		21.00000000	1.63523810	14.87836082	0.468453
22	-0.09013119	9.11408040	-0.82146288		22.00000000	1.56090909	14.22625095	0.489794
23	-0.07999349	9.10165210	-0.72807288		23.00000000	1.49304348	13.58916231	0.511174
24	-0.07016020	9.10025020	-0.63847540		24.00000000	1.43083333	13.02094133	0.532652
25	-0.05997115	9.10513690	-0.54604557		25.00000000	1.37360000	12.50681605	0.554032
26	-0.04988184	9.10013680	-0.45393152		26.00000000	1.32076923	12.01918068	0.575422
27	-0.04002473	9.11021040	-0.36463372		27.00000000	1.27185185	11.58683797	0.596771
28	-0.02986248	9.10002990	-0.27174943		28.00000000	1.22642857	11.16053667	0.618239
29	-0.02004631	9.11458490	-0.18271377		29.00000000	1.18413793	10.79292571	0.639633
30	-0.00991010	9.10061930	-0.09018806		30.00000000	1.14466667	10.41717556	0.661012
31	-0.00065437	9.10987000	-0.00596119		31.00000000	1.10774194	10.09138503	0.682550
32	0.00949949	9.10023020	0.08644758		32.00000000	1.07312500	9.76568453	0.704032
33	0.01933250	9.10789590	0.17607842		33.00000000	1.04060606	9.47773167	0.725407
34	0.02943939	9.09707830	0.26781245		34.00000000	1.01000000	9.18804908	0.746769
35	0.03930515	9.11174580	0.35813851		35.00000000	0.98114286	8.93992431	0.768131
36	0.04945223	9.09715840	0.44987474		36.00000000	0.95388889	8.67767832	0.789621
37	0.05929863	9.11049750	0.54024003		37.00000000	0.92810811	8.45552660	0.811004
38	0.06942859	9.10648250	0.63225027		38.00000000	0.90368421	8.22938445	0.832381
39	0.07953177	9.11185740	0.72468211		39.00000000	0.88051282	8.02310726	0.853743
40	0.08933947	9.09626390	0.81265535		40.00000000	0.85850000	7.80914256	0.875212
41	0.09948655	9.10568810	0.90589345		41.00000000	0.83756098	7.62656901	0.896587
42	0.10933890	9.10371020	0.99538966		42.00000000	0.81761905	7.44336686	0.917957
43	0.11949194	9.10379220	1.08782979		43.00000000	0.79860465	7.27033079	0.939310
44	0.12931229	9.10775180	1.17774424		44.00000000	0.78045455	7.10818629	0.960778
45	0.13941620	9.10073280	1.26878958		45.00000000	0.76311111	6.94487032	0.982142
46	0.14923954	9.10390380	1.35866242		46.00000000	0.74652174	6.79626210	1.003528
47	0.15943797	9.10059740	1.45098078		47.00000000	0.73063830	6.64924499	1.024999
48	0.16956198	9.11153030	1.54496912		48.00000000	0.71541667	6.51854064	1.046382
49	0.17939425	9.10436630	1.63327096		49.00000000	0.70081633	6.38048855	1.067741
50	0.18951230	9.10944940	1.72635271		50.00000000	0.68680000	6.25636985	1.089114
51	0.19928205	9.09936240	1.81333959		51.00000000	0.67333333	6.12690402	1.110597
52	0.20943211	9.10429290	1.90673127		52.00000000	0.66038462	6.01233497	1.131983
53	0.21927777	9.10792260	1.99716496		53.00000000	0.64792453	5.90124645	1.153334
54	0.22941814	9.09848500	2.08735751		54.00000000	0.63592593	5.78596250	1.174710
55	0.23923776	9.10907080	2.17923369		55.00000000	0.62436364	5.68737257	1.196189
56	0.24939674	9.09421920	2.26806862		56.00000000	0.61321429	5.57670513	1.217579
57	0.25951406	9.09270380	2.35968448		57.00000000	0.60245614	5.47795524	1.238939
58	0.26932994	9.10343170	2.45182671		58.00000000	0.59206897	5.38985939	1.260323
59	0.27955145	9.10769840	2.54607029		59.00000000	0.58203390	5.30098920	1.281805
60	0.28933087	9.09605030	2.63176815		60.00000000	0.57233333	5.20597279	1.303193
61	0.29950997	9.11127380	2.72891734		61.00000000	0.56295082	5.12919905	1.324538
62	0.30933702	9.08452320	2.81017933		62.00000000	0.55387097	5.03165366	1.345908
63	0.31948856	9.11476140	2.91206199		63.00000000	0.54507937	4.96826836	1.367395
64	0.32929701	9.10063080	2.99681051		64.00000000	0.53656250	4.88305721	1.388773
65	0.33941209	9.09414580	3.08666303		65.00000000	0.52830769	4.80450718	1.410128
66	0.34927782	9.10923770	3.18165469		66.00000000	0.52030303	4.73956398	1.431512
67	0.35941151	9.10415270	3.27213727		67.00000000	0.51253731	4.66621797	1.452991
68	0.36954370	9.10753150	3.36563089		68.00000000	0.50500000	4.59930341	1.474375
69	0.37937820	9.09918590	3.45203277		69.00000000	0.49768116	4.52849339	1.495735
70	0.38954389	9.10704330	3.54759307		70.00000000	0.49057143	4.46765524	1.517093
71	0.39934638	9.09283920	3.63119242		71.00000000	0.48366197	4.39786054	1.538561
72	0.40951356	9.10331630	3.72793147		72.00000000	0.47694444	4.34177614	1.559932
73	0.41931307	9.09044930	3.81174420		73.00000000	0.47041096	4.27624697	1.581320
74	0.42946836	9.08974170	3.90375646		74.00000000	0.46405405	4.21813149	1.602679
75	0.43928871	9.09180260	3.99392624		75.00000000	0.45786667	4.16283335	1.624152
76	0.44943208	9.10003850	4.08984923		76.00000000	0.45184211	4.11178055	1.645531
77	0.45959553	9.07393550	4.17034020		77.00000000	0.44597403	4.04673955	1.666913
78	0.46940395	9.08900550	4.26641508		78.00000000	0.44025641	4.00149293	1.688392
79	0.47956222	9.06907270	4.34918464		79.00000000	0.43468354	3.94217666	1.709786
80	0.48936990	9.08129020	4.44411008		80.00000000	0.42925000	3.89814382	1.731130
81	0.49951476	9.04793260	4.51957588		81.00000000	0.42395062	3.83587661	1.752499
82	0.50932693	9.04801940	4.60839994		82.00000000	0.41878049	3.78913398	1.773979
83	0.51946282	9.00870040	4.67968491		83.00000000	0.41373494	3.72721412	1.795355
84	0.52927279	8.99633600	4.76151585		84.00000000	0.40880952	3.67778784	1.816710
85	0.53940499	8.94843200	4.82682887		85.00000000	0.40400000	3.61516653	1.838088
86	0.54952604	8.88797660	4.88417458		86.00000000	0.39930233	3.54898973	1.859564
87	0.55939770	8.81381990	4.93043058		87.00000000	0.39471264	3.47892615	1.880945
88	0.56948078	8.66721530	4.93581253		88.00000000	0.39022727	3.38218379	1.902309
89	0.57930487	8.51633930	4.93355683		89.00000000	0.38584270	3.28596732	1.923684
90	0.58942515	8.26490880	4.87154511		90.00000000	0.38155556	3.15352187	1.945158
91	0.59923959	7.93561700	4.75533588		91.00000000	0.37736264	2.99460536	1.966552
92	0.60936654	7.50017930	4.57035831		92.00000000	0.37326087	2.79952345	1.988010
93	0.61918616	6.89530130	4.26947513		93.00000000	0.36924731	2.54607147	2.009424
94	0.62930870	6.08216240	3.82755771		94.00000000	0.36531915	2.22193039	2.030908
95	0.63940144	5.01793150	3.20847263		95.00000000	0.36147368	1.81385019	2.052331
96	0.64920539	3.70504090	2.40533252		96.00000000	0.35770833	1.32532401	2.073700
97	0.65924531	1.99978640	1.31834981		97.00000000	0.35402062	0.70796562	2.095089
98	0.66902399	-0.01924909	-0.01287810		98.00000000	0.35040816	-0.00674504	2.116576
99	0.67907655	-2.51315160	-1.70662232		99.00000000	0.34686869	-0.87173360	2.137966
100	0.68878227	-5.39872930	-3.71854902		100.00000000	0.34340000	-1.85392364	2.159328
101	0.69907230	-8.89420800	-6.21769444		101.00000000	0.34000000	-3.02403072	2.180687
