# Supplementary material for: Study on the Electrical Injection Regeneration of Industrialized B-Doped Czochralski Silicon PERC Solar Cells
Source: Hindawi journal article supplement (doi:10.1155/2019/5357370), 2019-06-20
Supplement: f1 [file 5357370.f1.zip › section3.3/IVRawData_3-8-4h.csv]

02:52 04/04/2018
Test Lot:	JK-PERC
Recipe:	Recipe_YJX-LID
Cell Name:	3-8-4h
Test Order:	2
Test Condition:	Light
1	-0.29985598	9.11334610	-2.73269133		1.00000000	34.34000000	312.95230507	0.000000
2	-0.29012558	9.11137010	-2.64344153		2.00000000	17.17000000	156.44222462	0.061784
3	-0.28003195	9.10770700	-2.55044895		3.00000000	11.44666667	104.25288613	0.083206
4	-0.27017501	9.11932950	-2.46381494		4.00000000	8.58500000	78.28944376	0.104705
5	-0.25995785	9.12255000	-2.37147848		5.00000000	6.86800000	62.65367340	0.126092
6	-0.24982926	9.11586760	-2.27741046		6.00000000	5.72333333	52.17314890	0.147440
7	-0.24001029	9.10424900	-2.18511344		7.00000000	4.90571429	44.66284438	0.168823
8	-0.22985044	9.12124630	-2.09652248		8.00000000	4.29250000	39.15294974	0.190315
9	-0.22007164	9.10938070	-2.00471635		9.00000000	3.81555556	34.75734814	0.211704
10	-0.20989914	9.11089420	-1.91236886		10.00000000	3.43400000	31.28681068	0.233144
11	-0.20008017	9.12123010	-1.82497727		11.00000000	3.12181818	28.47482197	0.254519
12	-0.18993670	9.12177560	-1.73255996		12.00000000	2.86166667	26.10348118	0.275995
13	-0.18014674	9.10566230	-1.64035538		13.00000000	2.64153846	24.05295718	0.297377
14	-0.17000921	9.12206940	-1.55083581		14.00000000	2.45285714	22.37513309	0.318753
15	-0.16018279	9.11476140	-1.46002791		15.00000000	2.28933333	20.86672710	0.340129
16	-0.15002815	9.11433220	-1.36740640		16.00000000	2.14625000	19.56163548	0.361604
17	-0.13990179	9.10792060	-1.27421440		17.00000000	2.02000000	18.39799961	0.382986
18	-0.13007686	9.12460140	-1.18689950		18.00000000	1.90777778	17.40771178	0.404380
19	-0.11992668	9.10439590	-1.09185997		19.00000000	1.80736842	16.45499764	0.425875
20	-0.11012556	9.11585810	-1.00388898		20.00000000	1.71700000	15.65192836	0.447309
21	-0.09995679	9.11393830	-0.91100000		21.00000000	1.63523810	14.90345911	0.468670
22	-0.09011696	9.11972140	-0.82184160		22.00000000	1.56090909	14.23505604	0.490059
23	-0.07996084	9.09974960	-0.72762360		23.00000000	1.49304348	13.58632179	0.511530
24	-0.07015377	9.10962100	-0.63907421		24.00000000	1.43083333	13.03434938	0.532891
25	-0.06002368	9.11988160	-0.54740889		25.00000000	1.37360000	12.52706937	0.554239
26	-0.04988021	9.10961250	-0.45438936		26.00000000	1.32076923	12.03169589	0.575620
27	-0.04006570	9.11655240	-0.36526101		27.00000000	1.27185185	11.59490405	0.597113
28	-0.02992445	9.10792730	-0.27254972		28.00000000	1.22642857	11.17022227	0.618481
29	-0.02008761	9.11046410	-0.18300742		29.00000000	1.18413793	10.78804611	0.639849
30	-0.00994041	9.11019520	-0.09055908		30.00000000	1.14466667	10.42813677	0.661233
31	-0.00069079	9.11709590	-0.00629797		31.00000000	1.10774194	10.09938946	0.682826
32	0.00943834	9.10600760	0.08594562		32.00000000	1.07312500	9.77188441	0.704222
33	0.01928905	9.12237450	0.17596189		33.00000000	1.04060606	9.49279819	0.725588
34	0.02941363	9.10098930	0.26769310		34.00000000	1.01000000	9.19199919	0.746959
35	0.03925465	9.12684250	0.35827104		35.00000000	0.98114286	8.95473633	0.768446
36	0.04938965	9.10428710	0.44965758		36.00000000	0.95388889	8.68447831	0.789833
37	0.05919049	9.12384510	0.54004489		37.00000000	0.92810811	8.46791461	0.811192
38	0.06936643	9.10663220	0.63169452		38.00000000	0.90368421	8.22951973	0.832577
39	0.07949473	9.11125660	0.72429688		39.00000000	0.88051282	8.02257825	0.854060
40	0.08930004	9.11110500	0.81362200		40.00000000	0.85850000	7.82188364	0.875466
41	0.09947448	9.11617470	0.90682669		41.00000000	0.83756098	7.63535218	0.896868
42	0.10930732	9.11319260	0.99613866		42.00000000	0.81761905	7.45111985	0.918228
43	0.11945572	9.11255650	1.08854700		43.00000000	0.79860465	7.27733000	0.939697
44	0.12928632	9.11736010	1.17874994		44.00000000	0.78045455	7.11568513	0.961079
45	0.13943025	9.12068080	1.27169880		45.00000000	0.76311111	6.96009286	0.982470
46	0.14925343	9.11290550	1.36013240		46.00000000	0.74652174	6.80298206	1.003832
47	0.15940925	9.11492630	1.45300357		47.00000000	0.73063830	6.65971424	1.025313
48	0.16955766	9.09934430	1.54286353		48.00000000	0.71541667	6.50982257	1.046691
49	0.17940761	9.12047860	1.63628327		49.00000000	0.70081633	6.39178031	1.068086
50	0.18948084	9.10809040	1.72580862		50.00000000	0.68680000	6.25543649	1.089572
51	0.19930847	9.11348820	1.81639539		51.00000000	0.67333333	6.13641539	1.110953
52	0.20941594	9.11843970	1.90954662		52.00000000	0.66038462	6.02167729	1.132319
53	0.21926887	9.11627480	1.99891527		53.00000000	0.64792453	5.90665805	1.153687
54	0.22939867	9.11284350	2.09047418		54.00000000	0.63592593	5.79509344	1.175179
55	0.23921141	9.12049390	2.18172621		55.00000000	0.62436364	5.69450474	1.196562
56	0.24937543	9.10193250	2.26979833		56.00000000	0.61321429	5.58143504	1.217915
57	0.25951639	9.12377830	2.36777001		57.00000000	0.60245614	5.49667626	1.239313
58	0.26929861	9.10882000	2.45299256		58.00000000	0.59206897	5.39304963	1.260803
59	0.27948573	9.10854150	2.54570737		59.00000000	0.58203390	5.30147992	1.282194
60	0.28929251	9.12388520	2.63947165		60.00000000	0.57233333	5.22190363	1.303556
61	0.29943272	9.11798570	2.73022326		61.00000000	0.56295082	5.13297752	1.324933
62	0.30925888	9.11370470	2.81849411		62.00000000	0.55387097	5.04781644	1.346414
63	0.31940874	9.11265850	2.91066277		63.00000000	0.54507937	4.96712211	1.367803
64	0.32921779	9.10809230	2.99854602		64.00000000	0.53656250	4.88706077	1.389167
65	0.33936617	9.11797900	3.09433361		65.00000000	0.52830769	4.81709844	1.410544
66	0.34923175	9.10293200	3.17903287		66.00000000	0.52030303	4.73628310	1.432017
67	0.35934889	9.12836270	3.28026700		67.00000000	0.51253731	4.67862649	1.453394
68	0.36951441	9.09840580	3.36199205		68.00000000	0.50500000	4.59469493	1.474769
69	0.37929219	9.12003800	3.45915919		69.00000000	0.49768116	4.53887109	1.496154
70	0.38947481	9.10470100	3.54605169		70.00000000	0.49057143	4.46650618	1.517629
71	0.39930022	9.10880660	3.63714848		71.00000000	0.48366197	4.40558336	1.539010
72	0.40943596	9.11819270	3.73331598		72.00000000	0.47694444	4.34887135	1.560373
73	0.41929334	9.09783550	3.81466183		73.00000000	0.47041096	4.27972152	1.581737
74	0.42941123	9.11283680	3.91315446		74.00000000	0.46405405	4.22884886	1.603210
75	0.43926194	9.10681530	4.00027736		75.00000000	0.45786667	4.16970717	1.624591
76	0.44936419	9.09525200	4.08708055		76.00000000	0.45184211	4.10961781	1.645972
77	0.45956990	9.10088920	4.18249474		77.00000000	0.44597403	4.05876020	1.667323
78	0.46940646	9.08759500	4.26577580		78.00000000	0.44025641	4.00087195	1.688811
79	0.47954518	9.08899310	4.35858283		79.00000000	0.43468354	3.95083573	1.710199
80	0.48938322	9.09266000	4.44979523		80.00000000	0.42925000	3.90302431	1.731593
81	0.49948624	9.04618070	4.51844278		81.00000000	0.42395062	3.83513389	1.753076
82	0.50929153	9.06993960	4.61924342		82.00000000	0.41878049	3.79831373	1.774477
83	0.51943624	9.02271650	4.68672593		83.00000000	0.41373494	3.73301307	1.795826
84	0.52925044	8.99997900	4.76324285		84.00000000	0.40880952	3.67927713	1.817198
85	0.53936684	8.95122050	4.82799152		85.00000000	0.40400000	3.61629308	1.838676
86	0.54951745	8.88444710	4.88215872		86.00000000	0.39930233	3.54758039	1.860062
87	0.55935925	8.80363560	4.92439501		87.00000000	0.39471264	3.47490628	1.881413
88	0.56946522	8.67191220	4.93835239		88.00000000	0.39022727	3.38401665	1.902797
89	0.57930326	8.51988510	4.93559721		89.00000000	0.38584270	3.28733544	1.924275
90	0.58942711	8.23840620	4.85593996		90.00000000	0.38155556	3.14340965	1.945656
91	0.59920639	7.92949250	4.75140258		91.00000000	0.37736264	2.99229420	1.967032
92	0.60932052	7.45650630	4.54340230		92.00000000	0.37326087	2.78322203	1.988517
93	0.61912137	6.86567970	4.25068902		93.00000000	0.36924731	2.53513377	2.010011
94	0.62923777	6.04478840	3.80360917		94.00000000	0.36531915	2.20827695	2.031395
95	0.63935190	4.97713660	3.18214174		95.00000000	0.36147368	1.79910390	2.052739
96	0.64915055	3.66225190	2.37735284		96.00000000	0.35770833	1.31001802	2.074124
97	0.65914041	1.98851780	1.31071244		97.00000000	0.35402062	0.70397630	2.095603
98	0.66893828	0.00013954	0.00009334		98.00000000	0.35040816	0.00004889	2.116978
99	0.67905766	-2.44648690	-1.66130567		99.00000000	0.34686869	-0.84860970	2.138343
100	0.68873942	-5.24750570	-3.61416403		100.00000000	0.34340000	-1.80199346	2.159723
101	0.69904262	-8.63618090	-6.03705852		101.00000000	0.34000000	-2.93630151	2.181204
02:53 04/04/2018
Test Lot:	JK-PERC
Recipe:	Recipe_YJX-LID
Cell Name:	3-8-4h
Test Order:	3
Test Condition:	Light
1	-0.29995051	9.11407180	-2.73377048		1.00000000	34.34000000	312.97722561	0.000000
2	-0.29010099	9.10743330	-2.64207542		2.00000000	17.17000000	156.37462976	0.021499
3	-0.27999550	9.12128350	-2.55391833		3.00000000	11.44666667	104.40829180	0.043008
4	-0.27017576	9.10989480	-2.46127275		4.00000000	8.58500000	78.20844686	0.064394
5	-0.26003081	9.11868190	-2.37113824		5.00000000	6.86800000	62.62710729	0.085787
6	-0.24987541	9.11596110	-2.27785452		6.00000000	5.72333333	52.17368403	0.107136
7	-0.24004155	9.11857130	-2.18883599		7.00000000	4.90571429	44.73310549	0.128611
8	-0.22989435	9.10942940	-2.09420635		8.00000000	4.29250000	39.10222570	0.149994
9	-0.22007462	9.11856840	-2.00676548		9.00000000	3.81555556	34.79240432	0.171429
10	-0.20992891	9.11255170	-1.91298805		10.00000000	3.43400000	31.29250254	0.192873
11	-0.20010100	9.11684420	-1.82428964		11.00000000	3.12181818	28.46112998	0.214340
12	-0.18997689	9.10584930	-1.72990093		12.00000000	2.86166667	26.05790541	0.235720
13	-0.18017873	9.11119840	-1.64164416		13.00000000	2.64153846	24.06758100	0.257126
14	-0.17001741	9.10521320	-1.54804477		14.00000000	2.45285714	22.33378723	0.278502
15	-0.16017088	9.11503700	-1.45996350		15.00000000	2.28933333	20.86735804	0.299986
16	-0.15005942	9.10923860	-1.36692706		16.00000000	2.14625000	19.55070335	0.321361
17	-0.13988914	9.11735340	-1.27541873		17.00000000	2.02000000	18.41705387	0.342725
18	-0.13007165	9.11445430	-1.18553211		18.00000000	1.90777778	17.38835337	0.364088
19	-0.11993338	9.10673710	-1.09220176		19.00000000	1.80736842	16.45922905	0.385564
20	-0.11011217	9.10727600	-1.00282192		20.00000000	1.71700000	15.63719289	0.406959
21	-0.09997316	9.11485000	-0.91124033		21.00000000	1.63523810	14.90494995	0.428349
22	-0.09012739	9.10692600	-0.82078343		22.00000000	1.56090909	14.21508358	0.449697
23	-0.07998838	9.11263180	-0.72890461		23.00000000	1.49304348	13.60555548	0.471165
24	-0.07018800	9.11188410	-0.63954493		24.00000000	1.43083333	13.03758750	0.492536
25	-0.06002368	9.11732670	-0.54725554		25.00000000	1.37360000	12.52355996	0.513914
26	-0.04986681	9.10863780	-0.45421871		26.00000000	1.32076923	12.03040854	0.535392
27	-0.04005751	9.10614780	-0.36476957		27.00000000	1.27185185	11.58167094	0.556779
28	-0.02989691	9.10825440	-0.27230869		28.00000000	1.22642857	11.17062343	0.578142
29	-0.02006454	9.11523530	-0.18289297		29.00000000	1.18413793	10.79369587	0.599516
30	-0.00993073	9.11462120	-0.09051488		30.00000000	1.14466667	10.43320307	0.620992
31	-0.00072353	9.11143210	-0.00659243		31.00000000	1.10774194	10.09311543	0.642483
32	0.00945099	9.11426540	0.08613887		32.00000000	1.07312500	9.78074606	0.663847
33	0.01926300	9.11419580	0.17556673		33.00000000	1.04060606	9.48428739	0.685227
34	0.02942405	9.10130500	0.26779721		34.00000000	1.01000000	9.19231805	0.706710
35	0.03923084	9.12461090	0.35796613		35.00000000	0.98114286	8.95254681	0.728081
36	0.04937923	9.10699080	0.44969622		36.00000000	0.95388889	8.68705734	0.749429
37	0.05922026	9.11460780	0.53976946		37.00000000	0.92810811	8.45934140	0.770845
38	0.06931730	9.10731120	0.63129426		38.00000000	0.90368421	8.23013333	0.792317
39	0.07946794	9.11433410	0.72429733		39.00000000	0.88051282	8.02528803	0.813692
40	0.08929408	9.11255650	0.81369731		40.00000000	0.85850000	7.82312976	0.835053
41	0.09948341	9.11076450	0.90636990		41.00000000	0.83756098	7.63082080	0.856427
42	0.10927085	9.11833950	0.99636871		42.00000000	0.81761905	7.45532806	0.877905
43	0.11943413	9.10651680	1.08762891		43.00000000	0.79860465	7.27250667	0.899292
44	0.12923273	9.11012170	1.17732590		44.00000000	0.78045455	7.11003589	0.920640
45	0.13940048	9.11180590	1.27019012		45.00000000	0.76311111	6.95332032	0.942021
46	0.14921769	9.10964970	1.35932088		46.00000000	0.74652174	6.80055154	0.963491
47	0.15935196	9.11625000	1.45269231		47.00000000	0.73063830	6.66068138	0.984854
48	0.16952491	9.11331460	1.54493384		48.00000000	0.71541667	6.51981715	1.006217
49	0.17934883	9.10297390	1.63260772		49.00000000	0.70081633	6.37951273	1.027584
50	0.18948606	9.10719110	1.72568576		50.00000000	0.68680000	6.25481885	1.049060
51	0.19924745	9.11607460	1.81635462		51.00000000	0.67333333	6.13815690	1.070444
52	0.20943306	9.10648820	1.90719969		52.00000000	0.66038462	6.01378471	1.091825
53	0.21924953	9.11322400	1.99807008		53.00000000	0.64792453	5.90468136	1.113170
54	0.22939792	9.11209300	2.09029518		54.00000000	0.63592593	5.79461618	1.134641
55	0.23917271	9.11237620	2.17943171		55.00000000	0.62436364	5.68943634	1.156031
56	0.24936502	9.10723970	2.27102701		56.00000000	0.61321429	5.58468949	1.177421
57	0.25948885	9.10954760	2.36382603		57.00000000	0.60245614	5.48810289	1.198903
58	0.26931947	9.11207290	2.45405864		58.00000000	0.59206897	5.39497558	1.220279
59	0.27950135	9.11265850	2.54700035		59.00000000	0.58203390	5.30387615	1.241630
60	0.28927392	9.09815880	2.63186006		60.00000000	0.57233333	5.20717955	1.263014
61	0.29946175	9.11506370	2.72961293		61.00000000	0.56295082	5.13133258	1.284498
62	0.30926928	9.10058590	2.81453165		62.00000000	0.55387097	5.04055032	1.305888
63	0.31940502	9.10912700	2.90950089		63.00000000	0.54507937	4.96519716	1.327234
64	0.32922223	9.10694600	2.99820907		64.00000000	0.53656250	4.88644571	1.348605
65	0.33938700	9.11582280	3.09379175		65.00000000	0.52830769	4.81595931	1.370096
66	0.34919679	9.10938740	3.18096884		66.00000000	0.52030303	4.73964187	1.391476
67	0.35934889	9.12076950	3.27753840		67.00000000	0.51253731	4.67473470	1.412848
68	0.36950326	9.10209470	3.36325366		68.00000000	0.50500000	4.59655782	1.434234
69	0.37932715	9.10867500	3.45516773		69.00000000	0.49768116	4.53321593	1.455710
70	0.38944206	9.11706920	3.55057021		70.00000000	0.49057143	4.47257366	1.477100
71	0.39926225	9.10973930	3.63717501		71.00000000	0.48366197	4.40603447	1.498447
72	0.40943521	9.09752460	3.72484690		72.00000000	0.47694444	4.33901382	1.519816
73	0.41925615	9.10080240	3.81556738		73.00000000	0.47041096	4.28111718	1.541297
74	0.42941943	9.11293890	3.91327303		74.00000000	0.46405405	4.22889624	1.562666
75	0.43924633	9.10450940	3.99912234		75.00000000	0.45786667	4.16865137	1.584014
76	0.44936940	9.09884830	4.08874400		76.00000000	0.45184211	4.11124277	1.605387
77	0.45953640	9.11218260	4.18737959		77.00000000	0.44597403	4.06379676	1.626863
78	0.46937075	9.09487820	4.26886980		78.00000000	0.44025641	4.00407843	1.648243
79	0.47950128	9.08274840	4.35518948		79.00000000	0.43468354	3.94812127	1.669620
80	0.48935866	9.08962920	4.44808877		80.00000000	0.42925000	3.90172333	1.690981
81	0.49948996	9.06728460	4.52901762		81.00000000	0.42395062	3.84408090	1.712457
82	0.50928932	9.05219080	4.61018410		82.00000000	0.41878049	3.79088088	1.733846
83	0.51942730	9.04418850	4.69779841		83.00000000	0.41373494	3.74189678	1.755230
84	0.52920878	8.99786760	4.76175054		84.00000000	0.40880952	3.67841397	1.776596
85	0.53937948	8.95759580	4.83154336		85.00000000	0.40400000	3.61886870	1.798075
86	0.54948395	8.88178060	4.88039589		86.00000000	0.39930233	3.54651565	1.819454
87	0.55934513	8.81726740	4.93189558		87.00000000	0.39471264	3.48028693	1.840844
88	0.56945777	8.67201710	4.93834752		88.00000000	0.39022727	3.38405758	1.862328
89	0.57923257	8.52359680	4.93714488		89.00000000	0.38584270	3.28876757	1.883749
90	0.58938468	8.26573280	4.87169628		90.00000000	0.38155556	3.15383627	1.905124
91	0.59918922	7.94506310	4.76059616		91.00000000	0.37736264	2.99816997	1.926512
92	0.60933244	7.48974080	4.56374204		92.00000000	0.37326087	2.79562716	1.948002
93	0.61913848	6.89362530	4.26810869		93.00000000	0.36924731	2.54545261	1.969401
94	0.62922883	6.06707430	3.81757806		94.00000000	0.36531915	2.21641842	1.990871
95	0.63932437	5.00561810	3.20021364		95.00000000	0.36147368	1.80939922	2.012271
96	0.64913189	3.70259860	2.40347483		96.00000000	0.35770833	1.32445037	2.033780
97	0.65915233	1.98778340	1.31025206		97.00000000	0.35402062	0.70371631	2.055155
98	0.66895241	-0.01775118	-0.01187469		98.00000000	0.35040816	-0.00622016	2.076494
99	0.67902637	-2.50123410	-1.69840391		99.00000000	0.34686869	-0.86759979	2.097875
100	0.68873942	-5.36461400	-3.69482113		100.00000000	0.34340000	-1.84220845	2.119352
101	0.69905823	-8.84917350	-6.18608756		101.00000000	0.34000000	-3.00871899	2.140728
02:53 04/04/2018
Test Lot:	JK-PERC
Recipe:	Recipe_YJX-LID
Cell Name:	3-8-4h
Test Order:	4
Test Condition:	Light
1	-0.29993588	9.11267850	-2.73321925		1.00000000	34.34000000	312.92937969	0.000000
2	-0.29009739	9.12832740	-2.64810395		2.00000000	17.17000000	156.73338146	0.061795
3	-0.27996266	9.11624810	-2.55220907		3.00000000	11.44666667	104.35065325	0.083214
4	-0.27014795	9.10775850	-2.46044229		4.00000000	8.58500000	78.19010672	0.104631
5	-0.26003405	9.11475660	-2.37014707		5.00000000	6.86800000	62.60014833	0.126102
6	-0.24987032	9.10308270	-2.27459019		6.00000000	5.72333333	52.09997665	0.147463
7	-0.24002883	9.11517520	-2.18790484		7.00000000	4.90571429	44.71644520	0.168841
8	-0.22988293	9.13298890	-2.09951825		8.00000000	4.29250000	39.20335485	0.190328
9	-0.22004218	9.10564610	-2.00362622		9.00000000	3.81555556	34.74309856	0.211695
10	-0.20991267	9.12392040	-1.91522649		10.00000000	3.43400000	31.33154265	0.233121
11	-0.20008978	9.10534190	-1.82188586		11.00000000	3.12181818	28.42522190	0.254509
12	-0.18994091	9.11801530	-1.73188412		12.00000000	2.86166667	26.09272045	0.276009
13	-0.18013293	9.10649010	-1.64037874		13.00000000	2.64153846	24.05514385	0.297397
14	-0.17000414	9.11275010	-1.54920524		14.00000000	2.45285714	22.35227417	0.318746
15	-0.16021253	9.11171530	-1.45981096		15.00000000	2.28933333	20.85975356	0.340121
16	-0.15004505	9.11339760	-1.36742020		16.00000000	2.14625000	19.55962960	0.361608
17	-0.13987981	9.10625840	-1.27378169		17.00000000	2.02000000	18.39464197	0.383001
18	-0.13008671	9.11457630	-1.18568524		18.00000000	1.90777778	17.38858612	0.404357
19	-0.11992369	9.10979270	-1.09247996		19.00000000	1.80736842	16.46475165	0.425724
20	-0.11010825	9.12156870	-1.00435997		20.00000000	1.71700000	15.66173346	0.447206
21	-0.09992812	9.11063580	-0.91040869		21.00000000	1.63523810	14.89805873	0.468600
22	-0.09008887	9.11696240	-0.82133681		22.00000000	1.56090909	14.23074949	0.489944
23	-0.07996233	9.11480140	-0.72884074		23.00000000	1.49304348	13.60879479	0.511313
24	-0.07014168	9.10899730	-0.63892038		24.00000000	1.43083333	13.03345697	0.532786
25	-0.05997123	9.12692260	-0.54735273		25.00000000	1.37360000	12.53674088	0.554154
26	-0.04981715	9.11017700	-0.45384301		26.00000000	1.32076923	12.03244147	0.575502
27	-0.04003371	9.10675050	-0.36457704		27.00000000	1.27185185	11.58243749	0.596876
28	-0.02986698	9.11809250	-0.27232989		28.00000000	1.22642857	11.18268916	0.618355
29	-0.02005154	9.10579780	-0.18258530		29.00000000	1.18413793	10.78252057	0.639718
30	-0.00992277	9.11424060	-0.09043849		30.00000000	1.14466667	10.43276741	0.661138
31	-0.00066628	9.09777550	-0.00606165		31.00000000	1.10774194	10.07798744	0.682611
32	0.00948908	9.12158390	0.08655546		32.00000000	1.07312500	9.78859972	0.704137
33	0.01931540	9.10439590	0.17585508		33.00000000	1.04060606	9.47408955	0.725522
34	0.02945505	9.11539550	0.26849446		34.00000000	1.01000000	9.20654946	0.746898
35	0.03928063	9.12206750	0.35832057		35.00000000	0.98114286	8.95005137	0.768280
36	0.04942921	9.11938760	0.45076414		36.00000000	0.95388889	8.69888251	0.789757
37	0.05923618	9.09898850	0.53898932		37.00000000	0.92810811	8.44484500	0.811127
38	0.06941304	9.11201950	0.63249301		38.00000000	0.90368421	8.23438815	0.832511
39	0.07955419	9.11285690	0.72496590		39.00000000	0.88051282	8.02398733	0.854000
40	0.08934627	9.11809920	0.81466813		40.00000000	0.85850000	7.82788816	0.875371
41	0.09949932	9.12388040	0.90781985		41.00000000	0.83756098	7.64180617	0.896720
42	0.10929065	9.10622020	0.99522472		42.00000000	0.81761905	7.44541909	0.918100
43	0.11945933	9.10537910	1.08772249		43.00000000	0.79860465	7.27159810	0.939577
44	0.12929979	9.11610320	1.17871023		44.00000000	0.78045455	7.11470418	0.960962
45	0.13941860	9.10938260	1.27001737		45.00000000	0.76311111	6.95147108	0.982322
46	0.14923376	9.11583140	1.36038980		46.00000000	0.74652174	6.80516631	1.003692
47	0.15944783	9.10980320	1.45253835		47.00000000	0.73063830	6.65597110	1.025186
48	0.16954283	9.12241650	1.54664031		48.00000000	0.71541667	6.52632880	1.046560
49	0.17937584	9.09371470	1.63119271		49.00000000	0.70081633	6.37302373	1.067905
50	0.18950880	9.11799530	1.72794035		50.00000000	0.68680000	6.26223917	1.089286
51	0.19929047	9.10129360	1.81380108		51.00000000	0.67333333	6.12820436	1.110763
52	0.20943533	9.13192940	1.91254865		52.00000000	0.66038462	6.03058568	1.132152
53	0.21927504	9.10487650	1.99647216		53.00000000	0.64792453	5.89927281	1.153489
54	0.22943628	9.10701270	2.08947912		54.00000000	0.63592593	5.79138548	1.174854
55	0.23921570	9.11163040	2.17964504		55.00000000	0.62436364	5.68897069	1.196338
56	0.24938141	9.11730000	2.27368513		56.00000000	0.61321429	5.59085861	1.217725
57	0.25951809	9.10011200	2.36164369		57.00000000	0.60245614	5.48241835	1.239077
58	0.26934144	9.12005520	2.45640880		58.00000000	0.59206897	5.39970165	1.260449
59	0.27951086	9.11044220	2.54646753		59.00000000	0.58203390	5.30258619	1.281925
60	0.28934982	9.10954090	2.63584402		60.00000000	0.57233333	5.21369391	1.303358
61	0.29948276	9.11351970	2.72934203		61.00000000	0.56295082	5.13046339	1.324721
62	0.30928528	9.11103630	2.81790941		62.00000000	0.55387097	5.04633849	1.346082
63	0.31945768	9.11199090	2.91089547		63.00000000	0.54507937	4.96675821	1.367555
64	0.32928994	9.11037730	2.99995559		64.00000000	0.53656250	4.88828682	1.388928
65	0.33943406	9.11402700	3.09361119		65.00000000	0.52830769	4.81501057	1.410305
66	0.34925517	9.11504170	3.18347544		66.00000000	0.52030303	4.74258382	1.431653
67	0.35937771	9.11094470	3.27427044		67.00000000	0.51253731	4.66969912	1.453129
68	0.36955234	9.11746980	3.36938230		68.00000000	0.50500000	4.60432225	1.474511
69	0.37934664	9.10095120	3.45241526		69.00000000	0.49768116	4.52937195	1.495900
70	0.38951829	9.10874650	3.54802336		70.00000000	0.49057143	4.46849078	1.517378
71	0.39929849	9.11514000	3.63966164		71.00000000	0.48366197	4.40864659	1.538755
72	0.40948650	9.10290240	3.72751564		72.00000000	0.47694444	4.34157873	1.560128
73	0.41929495	9.10941600	3.81953213		73.00000000	0.47041096	4.28516912	1.581493
74	0.42944875	9.10841460	3.91159726		74.00000000	0.46405405	4.22679672	1.602958
75	0.43924978	9.09818080	3.99637391		75.00000000	0.45786667	4.16575372	1.624347
76	0.44940206	9.09672260	4.08808588		76.00000000	0.45184211	4.11028229	1.645690
77	0.45953578	9.10234450	4.18285298		77.00000000	0.44597403	4.05940922	1.667064
78	0.46938294	9.08849140	4.26598281		78.00000000	0.44025641	4.00126660	1.688539
79	0.47955385	9.09099290	4.35962065		79.00000000	0.43468354	3.95170502	1.709969
80	0.48935187	9.08364680	4.44509955		80.00000000	0.42925000	3.89915539	1.731349
81	0.49946770	9.06845470	4.52940021		81.00000000	0.42395062	3.84457697	1.752726
82	0.50932604	9.06095790	4.61498181		82.00000000	0.41878049	3.79455237	1.774208
83	0.51946199	9.03263380	4.69210993		83.00000000	0.41373494	3.73711620	1.795589
84	0.52921611	9.00826640	4.76731970		84.00000000	0.40880952	3.68266510	1.816935
85	0.53938329	8.95447160	4.82989235		85.00000000	0.40400000	3.61760653	1.838308
86	0.54954231	8.89695550	4.88925348		86.00000000	0.39930233	3.55257502	1.859801
87	0.55938202	8.81033330	4.92834204		87.00000000	0.39471264	3.47754995	1.881175
88	0.56949413	8.66854860	4.93668754		88.00000000	0.39022727	3.38270408	1.902514
89	0.57929140	8.52945520	4.94104004		89.00000000	0.38584270	3.29102800	1.923884
90	0.58944595	8.27134420	4.87551034		90.00000000	0.38155556	3.15597733	1.945361
91	0.59923130	7.95167450	4.76489225		91.00000000	0.37736264	3.00066486	1.966729
92	0.60936278	7.50197460	4.57142410		92.00000000	0.37326087	2.80019356	1.988205
93	0.61916304	6.90116880	4.27294865		93.00000000	0.36924731	2.54823803	2.009588
94	0.62928486	6.09276910	3.83408735		94.00000000	0.36531915	2.22580522	2.031071
95	0.63938057	5.02960590	3.21583229		95.00000000	0.36147368	1.81807017	2.052436
96	0.64918905	3.70172720	2.40312076		96.00000000	0.35770833	1.32413867	2.073812
97	0.65925723	2.00941420	1.32472084		97.00000000	0.35402062	0.71137406	2.095181
98	0.66898459	-0.02099592	-0.01404595		98.00000000	0.35040816	-0.00735714	2.116650
99	0.67906988	-2.53122850	-1.71888103		99.00000000	0.34686869	-0.87800391	2.138015
100	0.68876302	-5.41489170	-3.72957716		100.00000000	0.34340000	-1.85947381	2.159408
101	0.69909841	-8.94701100	-6.25484116		101.00000000	0.34000000	-3.04198374	2.180892
