# Supplementary material for: Study on the Electrical Injection Regeneration of Industrialized B-Doped Czochralski Silicon PERC Solar Cells
Source: Hindawi journal article supplement (doi:10.1155/2019/5357370), 2019-06-20
Supplement: f1 [file 5357370.f1.zip › section3.3/IVRawData_3-8-5h.csv]

03:54 04/04/2018
Test Lot:	JK-PERC
Recipe:	Recipe_YJX-LID
Cell Name:	3-8-5h
Test Order:	2
Test Condition:	Light
1	-0.29994404	9.09708210	-2.72861556		1.00000000	34.34000000	312.39379931	0.000000
2	-0.29008770	9.11047840	-2.64283772		2.00000000	17.17000000	156.42691413	0.061842
3	-0.27997831	9.10138130	-2.54818936		3.00000000	11.44666667	104.18047795	0.083255
4	-0.27014875	9.10140800	-2.45873399		4.00000000	8.58500000	78.13558768	0.104742
5	-0.25996938	9.09970380	-2.36564436		5.00000000	6.86800000	62.49676570	0.126118
6	-0.24982800	9.10154820	-2.27382158		6.00000000	5.72333333	52.09119420	0.147458
7	-0.24003565	9.10630800	-2.18583856		7.00000000	4.90571429	44.67294525	0.168835
8	-0.22988458	9.10381410	-2.09282648		8.00000000	4.29250000	39.07812202	0.190323
9	-0.22006470	9.09719560	-2.00197162		9.00000000	3.81555556	34.71085521	0.211843
10	-0.20996870	9.10052300	-1.91082498		10.00000000	3.43400000	31.25119598	0.233216
11	-0.20010044	9.10395430	-1.82170526		11.00000000	3.12181818	28.42089006	0.254617
12	-0.18999030	9.09886650	-1.72869638		12.00000000	2.86166667	26.03792297	0.276096
13	-0.18017265	9.10254100	-1.64002893		13.00000000	2.64153846	24.04471215	0.297477
14	-0.17002456	9.11114880	-1.54911907		14.00000000	2.45285714	22.34834641	0.318836
15	-0.16020319	9.09918020	-1.45771769		15.00000000	2.28933333	20.83105654	0.340209
16	-0.15002756	9.10092740	-1.36538993		16.00000000	2.14625000	19.53286543	0.361680
17	-0.13991740	9.11961840	-1.27599330		17.00000000	2.02000000	18.42162917	0.383059
18	-0.13011613	9.09734920	-1.18371187		18.00000000	1.90777778	17.35572064	0.404397
19	-0.11993752	9.11591050	-1.09333970		19.00000000	1.80736842	16.47580877	0.425768
20	-0.11011615	9.10322860	-1.00241249		20.00000000	1.71700000	15.63024351	0.447258
21	-0.09995987	9.10392950	-0.91002756		21.00000000	1.63523810	14.88709233	0.468638
22	-0.09012362	9.10894300	-0.82093088		22.00000000	1.56090909	14.21823194	0.489998
23	-0.08000008	9.10409450	-0.72832829		23.00000000	1.49304348	13.59280892	0.511365
24	-0.07021369	9.09849070	-0.63883861		24.00000000	1.43083333	13.01842378	0.532831
25	-0.06000754	9.10884760	-0.54659953		25.00000000	1.37360000	12.51191306	0.554220
26	-0.04983711	9.10258100	-0.45364632		26.00000000	1.32076923	12.02240891	0.575607
27	-0.04004775	9.09650800	-0.36429464		27.00000000	1.27185185	11.56941055	0.596953
28	-0.02988030	9.09875580	-0.27187352		28.00000000	1.22642857	11.15897408	0.618420
29	-0.02004256	9.11372090	-0.18266225		29.00000000	1.18413793	10.79190261	0.639793
30	-0.00993465	9.09233570	-0.09032914		30.00000000	1.14466667	10.40769360	0.661176
31	-0.00066925	9.10136410	-0.00609107		31.00000000	1.10774194	10.08196268	0.682705
32	0.00945483	9.09602550	0.08600136		32.00000000	1.07312500	9.76117236	0.704171
33	0.01928187	9.10935310	0.17564536		33.00000000	1.04060606	9.47924804	0.725556
34	0.02944754	9.10208510	0.26803404		34.00000000	1.01000000	9.19310595	0.746915
35	0.03926119	9.10637950	0.35752725		35.00000000	0.98114286	8.93465920	0.768276
36	0.04941272	9.10154820	0.44973225		36.00000000	0.95388889	8.68186570	0.789762
37	0.05924646	9.10556980	0.53947276		37.00000000	0.92810811	8.45095316	0.811146
38	0.06938906	9.09610080	0.63116988		38.00000000	0.90368421	8.22000267	0.832504
39	0.07953687	9.10491940	0.72417679		39.00000000	0.88051282	8.01699826	0.853912
40	0.08935572	9.10542680	0.81362199		40.00000000	0.85850000	7.81700891	0.875396
41	0.09950130	9.10613730	0.90607254		41.00000000	0.83756098	7.62694524	0.896775
42	0.10929857	9.10237600	0.99487668		42.00000000	0.81761905	7.44227600	0.918164
43	0.11947095	9.09676840	1.08679956		43.00000000	0.79860465	7.26472155	0.939502
44	0.12929054	9.09839730	1.17633670		44.00000000	0.78045455	7.10088553	0.960985
45	0.13938625	9.10421850	1.26900288		45.00000000	0.76311111	6.94753030	0.982361
46	0.14922819	9.09501930	1.35723327		46.00000000	0.74652174	6.78962963	1.003743
47	0.15940724	9.10548690	1.45148054		47.00000000	0.73063830	6.65281745	1.025222
48	0.16953199	9.10242080	1.54315151		48.00000000	0.71541667	6.51202355	1.046608
49	0.17936647	9.09199520	1.63079908		49.00000000	0.70081633	6.37181868	1.067951
50	0.18948600	9.09626960	1.72361574		50.00000000	0.68680000	6.24731796	1.089325
51	0.19930263	9.09721370	1.81309862		51.00000000	0.67333333	6.12545722	1.110801
52	0.20942067	9.10143280	1.90602815		52.00000000	0.66038462	6.01044620	1.132181
53	0.21925440	9.09849260	1.99488454		53.00000000	0.64792453	5.89513653	1.153536
54	0.22939254	9.10043810	2.08757261		54.00000000	0.63592593	5.78720453	1.174912
55	0.23922479	9.10451890	2.17802662		55.00000000	0.62436364	5.68453053	1.196385
56	0.24935324	9.09694390	2.26835244		56.00000000	0.61321429	5.57837596	1.217780
57	0.25952265	9.09916690	2.36143991		57.00000000	0.60245614	5.48184897	1.239123
58	0.26935339	9.10554980	2.45261071		58.00000000	0.59206897	5.39111345	1.260497
59	0.27952728	9.09801010	2.54314202		59.00000000	0.58203390	5.29535029	1.281991
60	0.28933346	9.09246250	2.63075364		60.00000000	0.57233333	5.20391937	1.303377
61	0.29947755	9.11712550	2.73037441		61.00000000	0.56295082	5.13249327	1.324735
62	0.30929267	9.09710690	2.81366848		62.00000000	0.55387097	5.03862340	1.346109
63	0.31945091	9.09900950	2.90668686		63.00000000	0.54507937	4.95968232	1.367586
64	0.32927647	9.11041640	2.99984575		64.00000000	0.53656250	4.88830780	1.388961
65	0.33940196	9.10144140	3.08904705		65.00000000	0.52830769	4.80836150	1.410311
66	0.34924760	9.10296340	3.17918812		66.00000000	0.52030303	4.73629944	1.431681
67	0.35936639	9.08924480	3.26636909		67.00000000	0.51253731	4.65857711	1.453155
68	0.36952239	9.09792800	3.36188810		68.00000000	0.50500000	4.59445364	1.474537
69	0.37935835	9.10241890	3.45307861		69.00000000	0.49768116	4.53010239	1.495891
70	0.38950616	9.08697030	3.53943091		70.00000000	0.49057143	4.45780800	1.517254
71	0.39933246	9.09577850	3.63223960		71.00000000	0.48366197	4.39928216	1.538735
72	0.40948400	9.09855080	3.72571098		72.00000000	0.47694444	4.33950326	1.560106
73	0.41928202	9.09080700	3.81161192		73.00000000	0.47041096	4.27641524	1.581494
74	0.42944917	9.09941670	3.90773695		74.00000000	0.46405405	4.22262121	1.602832
75	0.43924496	9.09172150	3.99349285		75.00000000	0.45786667	4.16279622	1.624294
76	0.44940764	9.08660510	4.08358975		76.00000000	0.45184211	4.10571078	1.645672
77	0.45956588	9.09212880	4.17843217		77.00000000	0.44597403	4.05485329	1.667049
78	0.46941823	9.07510470	4.26001959		78.00000000	0.44025641	3.99537302	1.688522
79	0.47953030	9.07674310	4.35257334		79.00000000	0.43468354	3.94551086	1.709894
80	0.48935437	9.07546810	4.44111997		80.00000000	0.42925000	3.89564468	1.731231
81	0.49951038	9.05361270	4.52237352		81.00000000	0.42395062	3.83828469	1.752650
82	0.50931138	9.04424380	4.60633629		82.00000000	0.41878049	3.78755283	1.774128
83	0.51945692	9.02194690	4.68651275		83.00000000	0.41373494	3.73269466	1.795506
84	0.52924675	8.98608970	4.75585877		84.00000000	0.40880952	3.67359905	1.816860
85	0.53937823	8.94421580	4.82431529		85.00000000	0.40400000	3.61346318	1.838228
86	0.54955059	8.89093490	4.88601852		86.00000000	0.39930233	3.55017098	1.859705
87	0.55934042	8.79341030	4.91850981		87.00000000	0.39471264	3.47087023	1.881095
88	0.56948376	8.67947390	4.94281943		88.00000000	0.39022727	3.38696743	1.902438
89	0.57928473	8.50034710	4.92412127		89.00000000	0.38584270	3.27979685	1.923818
90	0.58941394	8.25723460	4.86692918		90.00000000	0.38155556	3.15059374	1.945287
91	0.59923726	7.94036250	4.75816107		91.00000000	0.37736264	2.99639613	1.966671
92	0.60932851	7.46753500	4.55018197		92.00000000	0.37326087	2.78733861	1.988126
93	0.61916971	6.87714390	4.25811919		93.00000000	0.36924731	2.53936690	2.009522
94	0.62927806	6.06249380	3.81499434		94.00000000	0.36531915	2.21474508	2.031016
95	0.63936412	4.98798180	3.18913659		95.00000000	0.36147368	1.80302416	2.052411
96	0.64915246	3.68440180	2.39173849		96.00000000	0.35770833	1.31794123	2.073768
97	0.65917373	1.97615600	1.30263012		97.00000000	0.35402062	0.69959997	2.095144
98	0.66897768	-0.04192885	-0.02804946		98.00000000	0.35040816	-0.01469221	2.116619
99	0.67907637	-2.52938960	-1.71764871		99.00000000	0.34686869	-0.87736605	2.137997
100	0.68877393	-5.40037010	-3.71963414		100.00000000	0.34340000	-1.85448709	2.159365
101	0.69906759	-8.90075110	-6.22222662		101.00000000	0.34000000	-3.02625537	2.180740
03:54 04/04/2018
Test Lot:	JK-PERC
Recipe:	Recipe_YJX-LID
Cell Name:	3-8-5h
Test Order:	3
Test Condition:	Light
1	-0.29997754	9.10859870	-2.73237503		1.00000000	34.34000000	312.78927936	0.000000
2	-0.29010484	9.09738730	-2.63919609		2.00000000	17.17000000	156.20213994	0.021579
3	-0.27999172	9.10624120	-2.54967214		3.00000000	11.44666667	104.23610760	0.042970
4	-0.27013832	9.10606100	-2.45989602		4.00000000	8.58500000	78.17553369	0.064328
5	-0.26002374	9.11572840	-2.37030579		5.00000000	6.86800000	62.60682265	0.085703
6	-0.24988456	9.09911630	-2.27372867		6.00000000	5.72333333	52.07727562	0.107256
7	-0.24002300	9.09639260	-2.18334344		7.00000000	4.90571429	44.62430313	0.128639
8	-0.22989425	9.10205840	-2.09251089		8.00000000	4.29250000	39.07058568	0.149982
9	-0.22008257	9.09896660	-2.00252395		9.00000000	3.81555556	34.71761256	0.171406
10	-0.20991512	9.11252400	-1.91285657		10.00000000	3.43400000	31.29240742	0.192888
11	-0.20008853	9.09949490	-1.82070456		11.00000000	3.12181818	28.40696862	0.214264
12	-0.18994342	9.10422800	-1.72928820		12.00000000	2.86166667	26.05326579	0.235620
13	-0.18020019	9.09730050	-1.63933528		13.00000000	2.64153846	24.03086917	0.256989
14	-0.17003348	9.10584740	-1.54829892		14.00000000	2.45285714	22.33534284	0.278472
15	-0.16020021	9.09602740	-1.45718550		15.00000000	2.28933333	20.82383873	0.299861
16	-0.15003946	9.08926490	-1.36374840		16.00000000	2.14625000	19.50783479	0.321206
17	-0.13993229	9.11003590	-1.27478819		17.00000000	2.02000000	18.40227252	0.342569
18	-0.13010944	9.09966560	-1.18395240		18.00000000	1.90777778	17.36013982	0.364047
19	-0.11994645	9.10516260	-1.09213193		19.00000000	1.80736842	16.45638335	0.385420
20	-0.11014220	9.10953710	-1.00334446		20.00000000	1.71700000	15.64107520	0.406763
21	-0.09996656	9.09581180	-0.90927704		21.00000000	1.63523810	14.87381796	0.428154
22	-0.09017423	9.10070990	-0.82064949		22.00000000	1.56090909	14.20538082	0.449623
23	-0.07998742	9.10355090	-0.72816957		23.00000000	1.49304348	13.59199730	0.471002
24	-0.07017648	9.10881230	-0.63922434		24.00000000	1.43083333	13.03319227	0.492393
25	-0.06003359	9.11098380	-0.54696503		25.00000000	1.37360000	12.51484735	0.513741
26	-0.04991600	9.09528640	-0.45400034		26.00000000	1.32076923	12.01277442	0.535218
27	-0.04006784	9.10794830	-0.36493585		27.00000000	1.27185185	11.58396091	0.556593
28	-0.02992049	9.10374070	-0.27238836		28.00000000	1.22642857	11.16508770	0.577963
29	-0.02007158	9.10255620	-0.18270271		29.00000000	1.18413793	10.77868207	0.599375
30	-0.00996665	9.10152150	-0.09071167		30.00000000	1.14466667	10.41820828	0.620845
31	-0.00069083	9.10116770	-0.00628738		31.00000000	1.10774194	10.08174512	0.642330
32	0.00943846	9.09907820	0.08588125		32.00000000	1.07312500	9.76444829	0.663723
33	0.01930866	9.10303500	0.17576743		33.00000000	1.04060606	9.47267339	0.685199
34	0.02943712	9.10011290	0.26788114		34.00000000	1.01000000	9.19111403	0.706588
35	0.03925077	9.10705570	0.35745894		35.00000000	0.98114286	8.93532265	0.727950
36	0.04940081	9.09286500	0.44919490		36.00000000	0.95388889	8.67358289	0.749324
37	0.05921148	9.09635260	0.53860848		37.00000000	0.92810811	8.44239860	0.770792
38	0.06936375	9.10113910	0.63128915		38.00000000	0.90368421	8.22455570	0.792155
39	0.07952347	9.10381600	0.72396707		39.00000000	0.88051282	8.01602670	0.813502
40	0.08933786	9.10174470	0.81313042		40.00000000	0.85850000	7.81384782	0.834877
41	0.09950056	9.10442830	0.90589571		41.00000000	0.83756098	7.62551385	0.856360
42	0.10931122	9.10404110	0.99517384		42.00000000	0.81761905	7.44363741	0.877738
43	0.11945755	9.10693170	1.08789175		43.00000000	0.79860465	7.27283801	0.899096
44	0.12926598	9.08852580	1.17483719		44.00000000	0.78045455	7.09318127	0.920474
45	0.13941081	9.10900590	1.26989389		45.00000000	0.76311111	6.95118361	0.941946
46	0.14923711	9.09900670	1.35790946		46.00000000	0.74652174	6.79260631	0.963332
47	0.15942511	9.08842750	1.44892355		47.00000000	0.73063830	6.64035320	0.984686
48	0.16957590	9.10528280	1.54403653		48.00000000	0.71541667	6.51407107	1.006055
49	0.17937467	9.08498290	1.62961581		49.00000000	0.70081633	6.36690434	1.027544
50	0.18949716	9.11308860	1.72690441		50.00000000	0.68680000	6.25886925	1.048920
51	0.19928476	9.09771440	1.81303583		51.00000000	0.67333333	6.12579436	1.070274
52	0.20943257	9.09269620	1.90430673		52.00000000	0.66038462	6.00467668	1.091646
53	0.21928418	9.10035990	1.99556496		53.00000000	0.64792453	5.89634640	1.113122
54	0.22939180	9.09997940	2.08746065		54.00000000	0.63592593	5.78691283	1.134507
55	0.23924562	9.09573170	2.17611397		55.00000000	0.62436364	5.67904412	1.155897
56	0.24936664	9.09259610	2.26739014		56.00000000	0.61321429	5.57570982	1.177235
57	0.25951371	9.11340520	2.36505359		57.00000000	0.60245614	5.49042692	1.198705
58	0.26935712	9.08420470	2.44689522		58.00000000	0.59206897	5.37847568	1.220078
59	0.27947739	9.10491090	2.54461673		59.00000000	0.58203390	5.29936678	1.241454
60	0.28931487	9.09054660	2.63003031		60.00000000	0.57233333	5.20282284	1.262847
61	0.29945374	9.09634110	2.72393336		61.00000000	0.56295082	5.12079268	1.284317
62	0.30928525	9.09660340	2.81344526		62.00000000	0.55387097	5.03834453	1.305688
63	0.31941965	9.11177830	2.91048104		63.00000000	0.54507937	4.96664233	1.327071
64	0.32923850	9.08548160	2.99129033		64.00000000	0.53656250	4.87492872	1.348553
65	0.33938557	9.10197160	3.08907782		65.00000000	0.52830769	4.80864161	1.369944
66	0.34920368	9.09543510	3.17615941		66.00000000	0.52030303	4.73238244	1.391289
67	0.35939169	9.10177990	3.27110406		67.00000000	0.51253731	4.66500182	1.412663
68	0.36953279	9.09454350	3.36073203		68.00000000	0.50500000	4.59274447	1.434149
69	0.37934348	9.10014440	3.45208045		69.00000000	0.49768116	4.52897042	1.455512
70	0.38949427	9.08591370	3.53891132		70.00000000	0.49057143	4.45728966	1.476852
71	0.39932203	9.10372260	3.63531699		71.00000000	0.48366197	4.40312442	1.498231
72	0.40947059	9.09186840	3.72285272		72.00000000	0.47694444	4.33631612	1.519700
73	0.41927308	9.09280780	3.81236953		73.00000000	0.47041096	4.27735644	1.541074
74	0.42943501	9.08786680	3.90264817		74.00000000	0.46405405	4.21726143	1.562429
75	0.43925390	9.09986210	3.99714992		75.00000000	0.45786667	4.16652353	1.583802
76	0.44941658	9.08930490	4.08488432		76.00000000	0.45184211	4.10693066	1.605280
77	0.45954505	9.08315370	4.17411832		77.00000000	0.44597403	4.05085062	1.626658
78	0.46942717	9.08354380	4.26406226		78.00000000	0.44025641	3.99908839	1.647998
79	0.47954372	9.07578370	4.35223508		79.00000000	0.43468354	3.94509383	1.669376
80	0.48935139	9.06621070	4.43656281		80.00000000	0.42925000	3.89167094	1.690852
81	0.49950069	9.06519130	4.52806931		81.00000000	0.42395062	3.84319345	1.712230
82	0.50930393	9.03292660	4.60050502		82.00000000	0.41878049	3.78281341	1.733584
83	0.51945919	9.02093600	4.68600811		83.00000000	0.41373494	3.73227641	1.754949
84	0.52920210	8.99503140	4.76018951		84.00000000	0.40880952	3.67725450	1.776420
85	0.53933430	8.93213940	4.81740915		85.00000000	0.40400000	3.60858432	1.797810
86	0.54951781	8.88528060	4.88261994		86.00000000	0.39930233	3.54791321	1.819167
87	0.55933070	8.78733730	4.91502752		87.00000000	0.39471264	3.46847314	1.840526
88	0.56945920	8.66337390	4.93343797		88.00000000	0.39022727	3.38068477	1.861996
89	0.57929891	8.49617390	4.92182428		89.00000000	0.38584270	3.27818665	1.883372
90	0.58941394	8.25093750	4.86321758		90.00000000	0.38155556	3.14819104	1.904745
91	0.59920675	7.92035910	4.74593264		91.00000000	0.37736264	2.98884760	1.926099
92	0.60930771	7.47345450	4.55363345		92.00000000	0.37326087	2.78954813	1.947574
93	0.61910343	6.88047080	4.25972307		93.00000000	0.36924731	2.54059535	1.968935
94	0.62922299	6.04394340	3.80298814		94.00000000	0.36531915	2.20796826	1.990418
95	0.63931352	4.99381400	3.19261281		95.00000000	0.36147368	1.80513234	2.011911
96	0.64914274	3.67126110	2.38317249		96.00000000	0.35770833	1.31324069	2.033343
97	0.65914917	1.96567460	1.29567278		97.00000000	0.35402062	0.69588934	2.054710
98	0.66896504	-0.04174637	-0.02792686		98.00000000	0.35040816	-0.01462827	2.076078
99	0.67907637	-2.54592780	-1.72887941		99.00000000	0.34686869	-0.88310263	2.097574
100	0.68874788	-5.41614060	-3.73035536		100.00000000	0.34340000	-1.85990268	2.118960
101	0.69902223	-8.90865520	-6.22734802		101.00000000	0.34000000	-3.02894277	2.140297
03:55 04/04/2018
Test Lot:	JK-PERC
Recipe:	Recipe_YJX-LID
Cell Name:	3-8-5h
Test Order:	4
Test Condition:	Light
1	-0.29990464	9.09283350	-2.72698296		1.00000000	34.34000000	312.24790239	0.000000
2	-0.29015568	9.07979110	-2.63455296		2.00000000	17.17000000	155.90001319	0.061754
3	-0.28001675	9.11209110	-2.55153814		3.00000000	11.44666667	104.30306946	0.083222
4	-0.27018592	9.09335230	-2.45689576		4.00000000	8.58500000	78.06642950	0.104663
5	-0.26002389	9.10921190	-2.36861271		5.00000000	6.86800000	62.56206733	0.126018
6	-0.24987081	9.09228610	-2.27189689		6.00000000	5.72333333	52.03818411	0.147456
7	-0.24005711	9.10751630	-2.18632404		7.00000000	4.90571429	44.67887282	0.168993
8	-0.22988392	9.09763150	-2.09139919		8.00000000	4.29250000	39.05158321	0.190408
9	-0.22006649	9.09988590	-2.00257995		9.00000000	3.81555556	34.72112020	0.211772
10	-0.20988885	9.10480310	-1.91099665		10.00000000	3.43400000	31.26589385	0.233142
11	-0.20007513	9.09808730	-1.82030100		11.00000000	3.12181818	28.40257435	0.254623
12	-0.18991908	9.09714130	-1.72772071		12.00000000	2.86166667	26.03298602	0.275998
13	-0.18016343	9.09685230	-1.63892011		13.00000000	2.64153846	24.02968523	0.297341
14	-0.17000289	9.10594750	-1.54803739		14.00000000	2.45285714	22.33558837	0.318725
15	-0.16019365	9.08304690	-1.45504644		15.00000000	2.28933333	20.79412204	0.340204
16	-0.15001228	9.10092930	-1.36525115		16.00000000	2.14625000	19.53286951	0.361578
17	-0.13988823	9.09770680	-1.27266210		17.00000000	2.02000000	18.37736774	0.382937
18	-0.13006634	9.09619620	-1.18310895		18.00000000	1.90777778	17.35352097	0.404315
19	-0.11995120	9.09579090	-1.09105103		19.00000000	1.80736842	16.43944524	0.425793
20	-0.11012410	9.10662840	-1.00285926		20.00000000	1.71700000	15.63608096	0.447168
21	-0.09997399	9.10119820	-0.90988312		21.00000000	1.63523810	14.88262601	0.468520
22	-0.09014614	9.10390470	-0.82068186		22.00000000	1.56090909	14.21036761	0.489889
23	-0.07996998	9.09905050	-0.72765089		23.00000000	1.49304348	13.58527801	0.511365
24	-0.07016521	9.09423540	-0.63809893		24.00000000	1.43083333	13.01233515	0.532758
25	-0.06006868	9.10353090	-0.54683710		25.00000000	1.37360000	12.50461004	0.554115
26	-0.04989773	9.09920880	-0.45402990		26.00000000	1.32076923	12.01795501	0.575491
27	-0.04006989	9.10999300	-0.36503638		27.00000000	1.27185185	11.58656147	0.596973
28	-0.02994062	9.09143160	-0.27220306		28.00000000	1.22642857	11.14999147	0.618356
29	-0.02011798	9.11329750	-0.18334112		29.00000000	1.18413793	10.79140125	0.639722
30	-0.00997754	9.09972950	-0.09079296		30.00000000	1.14466667	10.41615703	0.661092
31	-0.00070565	9.09476280	-0.00641775		31.00000000	1.10774194	10.07465015	0.682677
32	0.00945765	9.09400650	0.08600789		32.00000000	1.07312500	9.75900573	0.704048
33	0.01925247	9.10529330	0.17529937		33.00000000	1.04060606	9.47502339	0.725430
34	0.02943652	9.09478470	0.26771882		34.00000000	1.01000000	9.18573255	0.746786
35	0.03925069	9.10625840	0.35742696		35.00000000	0.98114286	8.93454038	0.768255
36	0.04939010	9.10298060	0.44959709		36.00000000	0.95388889	8.68323205	0.789629
37	0.05921022	9.09056380	0.53825426		37.00000000	0.92810811	8.43702597	0.811002
38	0.06935706	9.10109140	0.63122494		38.00000000	0.90368421	8.22451260	0.832410
39	0.07949498	9.10177230	0.72354517		39.00000000	0.88051282	8.01422720	0.853876
40	0.08932701	9.09970090	0.81284906		40.00000000	0.85850000	7.81209322	0.875235
41	0.09948576	9.09686370	0.90500842		41.00000000	0.83756098	7.61917804	0.896593
42	0.10931705	9.10902500	0.99577174		42.00000000	0.81761905	7.44771235	0.917957
43	0.11945794	9.09786030	1.08681165		43.00000000	0.79860465	7.26559355	0.939439
44	0.12930039	9.10499000	1.17727876		44.00000000	0.78045455	7.10603083	0.960829
45	0.13940704	9.10336780	1.26907356		45.00000000	0.76311111	6.94688112	0.982211
46	0.14924800	9.09373470	1.35722172		46.00000000	0.74652174	6.78867064	1.003573
47	0.15941197	9.10418890	1.45131669		47.00000000	0.73063830	6.65186908	1.025043
48	0.16956328	9.09036830	1.54139267		48.00000000	0.71541667	6.50340099	1.046426
49	0.17935586	9.08903030	1.63017085		49.00000000	0.70081633	6.36974083	1.067811
50	0.18950866	9.11343100	1.72707410		50.00000000	0.68680000	6.25910441	1.089170
51	0.19931167	9.09193710	1.81212917		51.00000000	0.67333333	6.12190431	1.110650
52	0.20943545	9.09823230	1.90549238		52.00000000	0.66038462	6.00833264	1.132035
53	0.21926153	9.10921380	1.99730015		53.00000000	0.64792453	5.90208305	1.153427
54	0.22942102	9.08510490	2.08431403		54.00000000	0.63592593	5.77745375	1.174903
55	0.23923668	9.10096740	2.17728523		55.00000000	0.62436364	5.68231310	1.196283
56	0.24938203	9.09582900	2.26833630		56.00000000	0.61321429	5.57769228	1.217653
57	0.25950804	9.09382340	2.35992029		57.00000000	0.60245614	5.47862975	1.239020
58	0.26935348	9.09478280	2.44971140		58.00000000	0.59206897	5.38473864	1.260490
59	0.27947351	9.11649230	2.54781810		59.00000000	0.58203390	5.30610755	1.281873
60	0.28930405	9.07775500	2.62623129		60.00000000	0.57233333	5.19550178	1.303221
61	0.29944792	9.10697750	2.72706547		61.00000000	0.56295082	5.12678045	1.324594
62	0.30927402	9.09408660	2.81256472		62.00000000	0.55387097	5.03695055	1.346081
63	0.31941414	9.09565540	2.90528095		63.00000000	0.54507937	4.95785407	1.367456
64	0.32923055	9.10066030	2.99621540		64.00000000	0.53656250	4.88307304	1.388863
65	0.33938706	9.08562560	3.08354376		65.00000000	0.52830769	4.80000589	1.410240
66	0.34920198	9.09426400	3.17573500		66.00000000	0.52030303	4.73177312	1.431728
67	0.35936445	9.10430240	3.27176262		67.00000000	0.51253731	4.66629469	1.453122
68	0.36952692	9.09355450	3.36031319		68.00000000	0.50500000	4.59224502	1.474470
69	0.37932920	9.09539700	3.45014967		69.00000000	0.49768116	4.52660772	1.495839
70	0.38948944	9.10056400	3.54457358		70.00000000	0.49057143	4.46447668	1.517313
71	0.39930063	9.08129120	3.62616530		71.00000000	0.48366197	4.39227521	1.538689
72	0.40944004	9.10182380	3.72665110		72.00000000	0.47694444	4.34106430	1.560028
73	0.41928470	9.08766170	3.81031751		73.00000000	0.47041096	4.27493565	1.581402
74	0.42945239	9.09227750	3.90470030		74.00000000	0.46405405	4.21930823	1.602880
75	0.43925318	9.08139990	3.98903378		75.00000000	0.45786667	4.15807030	1.624265
76	0.44940895	9.08863640	4.08451454		76.00000000	0.45184211	4.10662860	1.645646
77	0.45953643	9.07243250	4.16911324		77.00000000	0.44597403	4.04606925	1.667011
78	0.46942204	9.08356290	4.26402463		78.00000000	0.44025641	3.99909679	1.688480
79	0.47955552	9.06791690	4.34856960		79.00000000	0.43468354	3.94167426	1.709865
80	0.48936448	9.06430530	4.43574905		80.00000000	0.42925000	3.89085305	1.731246
81	0.49950758	9.06388950	4.52748151		81.00000000	0.42395062	3.84264155	1.752590
82	0.50928903	9.02773570	4.59772676		82.00000000	0.41878049	3.78063956	1.774065
83	0.51945150	9.01891710	4.68489002		83.00000000	0.41373494	3.73144112	1.795437
84	0.52923292	8.98014830	4.75259011		84.00000000	0.40880952	3.67117015	1.816830
85	0.53938127	8.93556500	4.81967640		85.00000000	0.40400000	3.60996826	1.838309
86	0.54949981	8.87996390	4.87953848		86.00000000	0.39930233	3.54579024	1.859683
87	0.55934078	8.79105380	4.91719489		87.00000000	0.39471264	3.46994009	1.881045
88	0.56946456	8.66214080	4.93278220		88.00000000	0.39022727	3.38020358	1.902420
89	0.57926679	8.50016120	4.92386109		89.00000000	0.38584270	3.27972512	1.923937
90	0.58939803	8.24448390	4.85928257		90.00000000	0.38155556	3.14572863	1.945319
91	0.59920180	7.92803290	4.75049158		91.00000000	0.37736264	2.99174340	1.966674
92	0.60928833	7.46589760	4.54888428		92.00000000	0.37326087	2.78672743	1.988166
93	0.61910176	6.87780240	4.25805957		93.00000000	0.36924731	2.53961005	2.009674
94	0.62921810	6.05291890	3.80860613		94.00000000	0.36531915	2.21124718	2.031044
95	0.63934708	4.98215580	3.18532676		95.00000000	0.36147368	1.80091821	2.052397
96	0.64912623	3.67653780	2.38653712		96.00000000	0.35770833	1.31512821	2.073769
97	0.65913171	1.96489870	1.29512704		97.00000000	0.35402062	0.69561465	2.095247
98	0.66894364	-0.04648954	-0.03109888		98.00000000	0.35040816	-0.01629032	2.116645
99	0.67905253	-2.54047250	-1.72511428		99.00000000	0.34686869	-0.88121036	2.138048
100	0.68872529	-5.41476870	-3.72928814		100.00000000	0.34340000	-1.85943157	2.159437
101	0.69907677	-8.91017630	-6.22889727		101.00000000	0.34000000	-3.02945994	2.180923
