# Supplementary material for: Study on the Electrical Injection Regeneration of Industrialized B-Doped Czochralski Silicon PERC Solar Cells
Source: Hindawi journal article supplement (doi:10.1155/2019/5357370), 2019-06-20
Supplement: f1 [file 5357370.f1.zip › section3.3/IVRawData_3-8-6h.csv]

04:56 04/04/2018
Test Lot:	JK-PERC
Recipe:	Recipe_YJX-LID
Cell Name:	3-8-6h
Test Order:	2
Test Condition:	Light
1	-0.29986784	9.08264640	-2.72359356		1.00000000	34.34000000	311.89807738	0.000000
2	-0.29009461	9.07827570	-2.63355885		2.00000000	17.17000000	155.87399377	0.061810
3	-0.27994776	9.09272480	-2.54548794		3.00000000	11.44666667	104.08138988	0.083248
4	-0.27012095	9.07782360	-2.45211033		4.00000000	8.58500000	77.93311561	0.104748
5	-0.25995103	9.09299180	-2.36373258		5.00000000	6.86800000	62.45066768	0.126130
6	-0.24981683	9.08335590	-2.26917518		6.00000000	5.72333333	51.98707360	0.147484
7	-0.24001087	9.08745100	-2.18108702		7.00000000	4.90571429	44.58043819	0.168857
8	-0.22983946	9.08288860	-2.08760621		8.00000000	4.29250000	38.98829932	0.190344
9	-0.22001265	9.08863260	-1.99961414		9.00000000	3.81555556	34.67818261	0.211733
10	-0.20987919	9.08308700	-1.90635094		10.00000000	3.43400000	31.19132076	0.233079
11	-0.20005760	9.08492280	-1.81750785		11.00000000	3.12181818	28.36147718	0.254463
12	-0.18990925	9.09199330	-1.72665363		12.00000000	2.86166667	26.01825416	0.275943
13	-0.18011147	9.08067700	-1.63553408		13.00000000	2.64153846	23.98695755	0.297336
14	-0.16997206	9.08445550	-1.54410362		14.00000000	2.45285714	22.28287156	0.318683
15	-0.16012962	9.08883290	-1.45539136		15.00000000	2.28933333	20.80736812	0.340052
16	-0.15001775	9.08285330	-1.36258922		16.00000000	2.14625000	19.49407390	0.361520
17	-0.13986123	9.08401300	-1.27050123		17.00000000	2.02000000	18.34970626	0.382888
18	-0.13002475	9.08122920	-1.18078456		18.00000000	1.90777778	17.32496726	0.404229
19	-0.11990022	9.07954600	-1.08863956		19.00000000	1.80736842	16.41008472	0.425614
20	-0.11008011	9.08391950	-0.99995886		20.00000000	1.71700000	15.59708978	0.447086
21	-0.09987967	9.07066060	-0.90597456		21.00000000	1.63523810	14.83268976	0.468464
22	-0.09010422	9.08830070	-0.81889420		22.00000000	1.56090909	14.18601118	0.489834
23	-0.07990006	9.08429720	-0.72583586		23.00000000	1.49304348	13.56325069	0.511195
24	-0.07011567	9.07339760	-0.63618736		24.00000000	1.43083333	12.98251973	0.532673
25	-0.05992639	9.07960890	-0.54410822		25.00000000	1.37360000	12.47175079	0.554062
26	-0.04980262	9.08673860	-0.45254335		26.00000000	1.32076923	12.00148475	0.575443
27	-0.04000334	9.08746430	-0.36352896		27.00000000	1.27185185	11.55790830	0.596786
28	-0.02986022	9.07267190	-0.27091193		28.00000000	1.22642857	11.12698404	0.618251
29	-0.02004010	9.08877090	-0.18213991		29.00000000	1.18413793	10.76235837	0.639625
30	-0.00990367	9.07326890	-0.08985869		30.00000000	1.14466667	10.38586847	0.661015
31	-0.00067229	9.08741090	-0.00610940		31.00000000	1.10774194	10.06650614	0.682610
32	0.00952719	9.09265800	0.08662752		32.00000000	1.07312500	9.75755862	0.703994
33	0.01934479	9.07684520	0.17558968		33.00000000	1.04060606	9.44542013	0.725354
34	0.02947796	9.07242490	0.26743656		34.00000000	1.01000000	9.16314915	0.746736
35	0.03930821	9.08484940	0.35710912		35.00000000	0.98114286	8.91353510	0.768222
36	0.04945403	9.09314160	0.44969246		36.00000000	0.95388889	8.67384674	0.789620
37	0.05925004	9.08391950	0.53822258		37.00000000	0.92810811	8.43085934	0.810968
38	0.06938395	9.08396820	0.63028159		38.00000000	0.90368421	8.20903863	0.832347
39	0.07952307	9.07896330	0.72198705		39.00000000	0.88051282	7.99414358	0.853832
40	0.08931834	9.09118460	0.81200947		40.00000000	0.85850000	7.80478198	0.875206
41	0.09945820	9.07818410	0.90289988		41.00000000	0.83756098	7.60353273	0.896554
42	0.10931078	9.08623120	0.99322302		42.00000000	0.81761905	7.42907570	0.917932
43	0.11947818	9.09571360	1.08673931		43.00000000	0.79860465	7.26387919	0.939407
44	0.12927791	9.06727980	1.17219898		44.00000000	0.78045455	7.07659973	0.960804
45	0.13942596	9.07539180	1.26534521		45.00000000	0.76311111	6.92553232	0.982144
46	0.14928152	9.09197330	1.35726359		46.00000000	0.74652174	6.78735572	1.003505
47	0.15939385	9.07814030	1.44699973		47.00000000	0.73063830	6.63283698	1.024974
48	0.16956274	9.08124640	1.53984102		48.00000000	0.71541667	6.49687503	1.046349
49	0.17938927	9.07456400	1.62787941		49.00000000	0.70081633	6.35960261	1.067704
50	0.18953359	9.09685800	1.72416015		50.00000000	0.68680000	6.24772207	1.089138
51	0.19931100	9.06951620	1.80765434		51.00000000	0.67333333	6.10680757	1.110624
52	0.20945905	9.09386440	1.90479220		52.00000000	0.66038462	6.00544814	1.131998
53	0.21928187	9.07294180	1.98953164		53.00000000	0.64792453	5.87858154	1.153365
54	0.22944182	9.08440690	2.08434285		54.00000000	0.63592593	5.77700987	1.174737
55	0.23926984	9.08169650	2.17297607		55.00000000	0.62436364	5.67028105	1.196210
56	0.24943501	9.07444100	2.26348328		56.00000000	0.61321429	5.56457686	1.217600
57	0.25956222	9.08271310	2.35752918		57.00000000	0.60245614	5.47193628	1.238980
58	0.26936343	9.09397980	2.44958559		58.00000000	0.59206897	5.38426321	1.260330
59	0.27954870	9.08283520	2.53909477		59.00000000	0.58203390	5.28651798	1.281807
60	0.28935960	9.08207040	2.62798426		60.00000000	0.57233333	5.19797163	1.303190
61	0.29949725	9.08704850	2.72154604		61.00000000	0.56295082	5.11556140	1.324585
62	0.30929324	9.08102230	2.80869881		62.00000000	0.55387097	5.02971461	1.346067
63	0.31946364	9.08287330	2.90164777		63.00000000	0.54507937	4.95088681	1.367446
64	0.32924849	9.08492760	2.99119869		64.00000000	0.53656250	4.87463147	1.388803
65	0.33944565	9.07340620	3.07992827		65.00000000	0.52830769	4.79355029	1.410178
66	0.34921339	9.08057400	3.17105803		66.00000000	0.52030303	4.72465017	1.431670
67	0.35939863	9.07815070	3.26267492		67.00000000	0.51253731	4.65289097	1.453064
68	0.36955562	9.07315060	3.35303380		68.00000000	0.50500000	4.58194105	1.474409
69	0.37935686	9.07411670	3.44232842		69.00000000	0.49768116	4.51601692	1.495782
70	0.38950193	9.08745770	3.53958231		70.00000000	0.49057143	4.45804711	1.517264
71	0.39933142	9.07203100	3.62274702		71.00000000	0.48366197	4.38779640	1.538653
72	0.40951073	9.08236790	3.71932711		72.00000000	0.47694444	4.33178491	1.560007
73	0.41930750	9.06670190	3.80173611		73.00000000	0.47041096	4.26507593	1.581380
74	0.42944735	9.06686880	3.89374278		74.00000000	0.46405405	4.20751722	1.602859
75	0.43927240	9.09200670	3.99386760		75.00000000	0.45786667	4.16292680	1.624241
76	0.44944352	9.05413060	4.06932033		76.00000000	0.45184211	4.09103743	1.645597
77	0.45958638	9.07483770	4.17067181		77.00000000	0.44597403	4.04714190	1.666963
78	0.46942109	9.05859470	4.25229540		78.00000000	0.44025641	3.98810438	1.688436
79	0.47956765	9.06013870	4.34494943		79.00000000	0.43468354	3.93829320	1.709816
80	0.48939714	9.05169580	4.42987404		80.00000000	0.42925000	3.88544042	1.731160
81	0.49951693	9.03809640	4.51468217		81.00000000	0.42395062	3.83170655	1.752541
82	0.50932634	9.02300830	4.59565579		82.00000000	0.41878049	3.77865982	1.774015
83	0.51948553	8.99923230	4.67497096		83.00000000	0.41373494	3.72329683	1.795396
84	0.52925700	8.97277550	4.74890424		84.00000000	0.40880952	3.66815608	1.816772
85	0.53936410	8.92280010	4.81263805		85.00000000	0.40400000	3.60481124	1.838143
86	0.54955459	8.86979770	4.87443804		86.00000000	0.39930233	3.54173085	1.859613
87	0.55937296	8.76800540	4.90458513		87.00000000	0.39471264	3.46084259	1.880994
88	0.56950235	8.65499590	4.92904050		88.00000000	0.39022727	3.37741545	1.902375
89	0.57931924	8.47367950	4.90896557		89.00000000	0.38584270	3.26950735	1.923737
90	0.58940697	8.22392370	4.84723795		90.00000000	0.38155556	3.13788378	1.945205
91	0.59924692	7.90721460	4.73837399		91.00000000	0.37736264	2.98388736	1.966582
92	0.60934734	7.43681290	4.53160216		92.00000000	0.37326087	2.77587125	1.988068
93	0.61916345	6.82055760	4.22303997		93.00000000	0.36924731	2.51847256	2.009575
94	0.62926906	6.01999040	3.78819370		94.00000000	0.36531915	2.19921777	2.030970
95	0.63939631	4.95240500	3.16654948		95.00000000	0.36147368	1.79016408	2.052379
96	0.64918113	3.63660120	2.36081288		96.00000000	0.35770833	1.30084255	2.073767
97	0.65921831	1.94674780	1.28333179		97.00000000	0.35402062	0.68918886	2.095252
98	0.66898531	-0.04914208	-0.03287533		98.00000000	0.35040816	-0.01721979	2.116634
99	0.67910582	-2.50364280	-1.70023840		99.00000000	0.34686869	-0.86843529	2.137994
100	0.68881994	-5.31839800	-3.66341859		100.00000000	0.34340000	-1.82633787	2.159370
101	0.69910866	-8.73142150	-6.10421238		101.00000000	0.34000000	-2.96868331	2.180853
04:56 04/04/2018
Test Lot:	JK-PERC
Recipe:	Recipe_YJX-LID
Cell Name:	3-8-6h
Test Order:	3
Test Condition:	Light
1	-0.29992813	9.07755470	-2.72261401		1.00000000	34.34000000	311.72322840	0.000000
2	-0.29007304	9.08685490	-2.63585162		2.00000000	17.17000000	156.02129863	0.021592
3	-0.27994108	9.09935670	-2.54728374		3.00000000	11.44666667	104.15730303	0.042978
4	-0.27017602	9.07962610	-2.45309724		4.00000000	8.58500000	77.94859007	0.064419
5	-0.25995177	9.08856580	-2.36258877		5.00000000	6.86800000	62.42026991	0.085790
6	-0.24986596	9.08469770	-2.26995671		6.00000000	5.72333333	51.99475317	0.107291
7	-0.24004510	9.08804320	-2.18154024		7.00000000	4.90571429	44.58334336	0.128677
8	-0.22989230	9.09300520	-2.09041188		8.00000000	4.29250000	39.03172482	0.150063
9	-0.22005433	9.07656860	-1.99733822		9.00000000	3.81555556	34.63215175	0.171547
10	-0.20990153	9.09190850	-1.90840550		10.00000000	3.43400000	31.22161379	0.192941
11	-0.20008513	9.07891460	-1.81655581		11.00000000	3.12181818	28.34272067	0.214308
12	-0.18991596	9.08752630	-1.72586628		12.00000000	2.86166667	26.00547110	0.235680
13	-0.18012486	9.07041550	-1.63380732		13.00000000	2.64153846	23.95985141	0.257172
14	-0.16997728	9.09588720	-1.54609417		14.00000000	2.45285714	22.31091189	0.278548
15	-0.16017130	9.08185390	-1.45465235		15.00000000	2.28933333	20.79139086	0.299896
16	-0.14997011	9.08139800	-1.36193826		16.00000000	2.14625000	19.49095046	0.321282
17	-0.13984559	9.06938930	-1.26831410		17.00000000	2.02000000	18.32016639	0.342773
18	-0.13004187	9.08990100	-1.18206772		18.00000000	1.90777778	17.34151113	0.364161
19	-0.11987343	9.07976910	-1.08842307		19.00000000	1.80736842	16.41048794	0.385515
20	-0.11005481	9.08050060	-0.99935277		20.00000000	1.71700000	15.59121953	0.406891
21	-0.09988488	9.07712270	-0.90666727		21.00000000	1.63523810	14.84325683	0.428363
22	-0.09007370	9.07591250	-0.81750099		22.00000000	1.56090909	14.16667433	0.449730
23	-0.07993653	9.08034520	-0.72585126		23.00000000	1.49304348	13.55735018	0.471085
24	-0.07012013	9.08488750	-0.63703352		24.00000000	1.43083333	12.99895986	0.492470
25	-0.05999115	9.07299900	-0.54429962		25.00000000	1.37360000	12.46267143	0.513949
26	-0.04980559	9.08273510	-0.45237101		26.00000000	1.32076923	11.99619705	0.535322
27	-0.04003312	9.08447740	-0.36367995		27.00000000	1.27185185	11.55410940	0.556688
28	-0.02985277	9.07645990	-0.27095749		28.00000000	1.22642857	11.13162975	0.578058
29	-0.02003043	9.08500480	-0.18197655		29.00000000	1.18413793	10.75789879	0.599538
30	-0.00988358	9.08797650	-0.08982172		30.00000000	1.14466667	10.40270377	0.620922
31	-0.00065220	9.07740590	-0.00592026		31.00000000	1.10774194	10.05542318	0.642399
32	0.00947435	9.08128450	0.08603928		32.00000000	1.07312500	9.74535343	0.663766
33	0.01931949	9.08546350	0.17552648		33.00000000	1.04060606	9.45438838	0.685252
34	0.02940204	9.07633780	0.26686287		34.00000000	1.01000000	9.16710118	0.706623
35	0.03925611	9.08788680	0.35675506		35.00000000	0.98114286	8.91651522	0.728019
36	0.04939076	9.05695440	0.44732989		36.00000000	0.95388889	8.63932817	0.749372
37	0.05923143	9.09552000	0.53874069		37.00000000	0.92810811	8.44162586	0.770841
38	0.06934897	9.07912350	0.62962785		38.00000000	0.90368421	8.20466055	0.792238
39	0.07952828	9.08782670	0.72273923		39.00000000	0.88051282	8.00194792	0.813617
40	0.08934439	9.07004170	0.81035734		40.00000000	0.85850000	7.78663080	0.835101
41	0.09951179	9.08721260	0.90428476		41.00000000	0.83756098	7.61109465	0.856484
42	0.10934427	9.06837460	0.99157480		42.00000000	0.81761905	7.41447580	0.877835
43	0.11948042	9.08067700	1.08496310		43.00000000	0.79860465	7.25187089	0.899220
44	0.12929951	9.07704260	1.17365716		44.00000000	0.78045455	7.08421916	0.920702
45	0.13940215	9.07856080	1.26557089		45.00000000	0.76311111	6.92795062	0.942079
46	0.14927408	9.08504100	1.35616114		46.00000000	0.74652174	6.78218061	0.963449
47	0.15942958	9.08824060	1.44893438		47.00000000	0.73063830	6.64021664	0.984821
48	0.16954711	9.07877160	1.53927949		48.00000000	0.71541667	6.49510452	1.006297
49	0.17937513	9.07994460	1.62871624		49.00000000	0.70081633	6.36337342	1.027687
50	0.18950680	9.07959940	1.72064583		50.00000000	0.68680000	6.23586887	1.049041
51	0.19930951	9.08500100	1.81072710		51.00000000	0.67333333	6.11723401	1.070408
52	0.20948288	9.08347420	1.90283234		52.00000000	0.66038462	5.99858662	1.091892
53	0.21929897	9.07913490	1.99104493		53.00000000	0.64792453	5.88259420	1.113277
54	0.22942768	9.07318400	2.08163956		54.00000000	0.63592593	5.76987294	1.134620
55	0.23924603	9.08195210	2.17282098		55.00000000	0.62436364	5.67044064	1.155997
56	0.24941714	9.07645510	2.26382347		56.00000000	0.61321429	5.56581193	1.177490
57	0.25950268	9.08656790	2.35798872		57.00000000	0.60245614	5.47425863	1.198870
58	0.26938578	9.07060910	2.44349311		58.00000000	0.59206897	5.37042615	1.220233
59	0.27953011	9.08659460	2.53997679		59.00000000	0.58203390	5.28870608	1.241609
60	0.28935960	9.07058530	2.62466093		60.00000000	0.57233333	5.19139832	1.263086
61	0.29949203	9.08575250	2.72111046		61.00000000	0.56295082	5.11483182	1.284472
62	0.30931708	9.07431030	2.80683917		62.00000000	0.55387097	5.02599703	1.305845
63	0.31946290	9.09369750	2.90509898		63.00000000	0.54507937	4.95678686	1.327215
64	0.32929313	9.06207750	2.98407986		64.00000000	0.53656250	4.86237096	1.348695
65	0.33937496	9.07744790	3.08065852		65.00000000	0.52830769	4.79568555	1.370077
66	0.34919626	9.08410640	3.17213598		66.00000000	0.52030303	4.72648809	1.391474
67	0.35938525	9.07070540	3.25987773		67.00000000	0.51253731	4.64907498	1.412823
68	0.36953405	9.08467580	3.35709704		68.00000000	0.50500000	4.58776128	1.434301
69	0.37937471	9.06455610	3.43886334		69.00000000	0.49768116	4.51125879	1.455674
70	0.38950863	9.08847710	3.54004026		70.00000000	0.49057143	4.45854719	1.477058
71	0.39933738	9.07440090	3.62374748		71.00000000	0.48366197	4.38894263	1.498546
72	0.40948170	9.07418730	3.71571364		72.00000000	0.47694444	4.32788322	1.519932
73	0.41931868	9.07933240	3.80713368		73.00000000	0.47041096	4.27101746	1.541281
74	0.42943546	9.07009320	3.89501965		74.00000000	0.46405405	4.20901352	1.562653
75	0.43926868	9.07331090	3.98562130		75.00000000	0.45786667	4.15436662	1.584130
76	0.44942120	9.07330420	4.07773526		76.00000000	0.45184211	4.09970087	1.605509
77	0.45955437	9.07305240	4.16956088		77.00000000	0.44597403	4.04634571	1.626873
78	0.46942034	9.05989360	4.25289833		78.00000000	0.44025641	3.98867623	1.648254
79	0.47956020	9.04796790	4.33904530		79.00000000	0.43468354	3.93300276	1.669735
80	0.48935995	9.04011920	4.42387228		80.00000000	0.42925000	3.88047117	1.691126
81	0.49951544	9.03649230	4.51386743		81.00000000	0.42395062	3.83102649	1.712484
82	0.50931442	9.02619270	4.59717010		82.00000000	0.41878049	3.77999338	1.733854
83	0.51948106	8.99137020	4.67084652		83.00000000	0.41373494	3.72004401	1.755336
84	0.52926815	8.96726510	4.74608781		84.00000000	0.40880952	3.66590338	1.776712
85	0.53939390	8.91846280	4.81056443		85.00000000	0.40400000	3.60305897	1.798068
86	0.54953450	8.87048340	4.87463666		86.00000000	0.39930233	3.54200465	1.819459
87	0.55935282	8.76937100	4.90517240		87.00000000	0.39471264	3.46138161	1.840982
88	0.56949496	8.64347270	4.92241414		88.00000000	0.39022727	3.37291878	1.862369
89	0.57929170	8.46637820	4.90450262		89.00000000	0.38584270	3.26669020	1.883727
90	0.58943599	8.22538090	4.84833553		90.00000000	0.38155556	3.13843978	1.905106
91	0.59922385	7.89569190	4.73128690		91.00000000	0.37736264	2.97953912	1.926580
92	0.60934657	7.44609740	4.53725391		92.00000000	0.37326087	2.77933679	1.947965
93	0.61915898	6.83153770	4.22980791		93.00000000	0.36924731	2.52252693	1.969336
94	0.62927431	6.02583220	3.79190140		94.00000000	0.36531915	2.20135189	1.990806
95	0.63938063	4.97256900	3.17936430		95.00000000	0.36147368	1.79745284	2.012316
96	0.64914989	3.63813900	2.36169753		96.00000000	0.35770833	1.30139264	2.033688
97	0.65921754	1.94316940	1.28097135		97.00000000	0.35402062	0.68792203	2.055131
98	0.66898304	-0.07100124	-0.04749862		98.00000000	0.35040816	-0.02487941	2.076499
99	0.67905366	-2.55524540	-1.73514874		99.00000000	0.34686869	-0.88633462	2.097986
100	0.68878126	-5.40556530	-3.72325208		100.00000000	0.34340000	-1.85627112	2.119378
101	0.69906324	-8.88681700	-6.21244709		101.00000000	0.34000000	-3.02151778	2.140759
04:56 04/04/2018
Test Lot:	JK-PERC
Recipe:	Recipe_YJX-LID
Cell Name:	3-8-6h
Test Order:	4
Test Condition:	Light
1	-0.29993197	9.09527590	-2.72796402		1.00000000	34.34000000	312.33177441	0.000000
2	-0.29012826	9.08951280	-2.63712453		2.00000000	17.17000000	156.06693478	0.061799
3	-0.27999705	9.08230690	-2.54301914		3.00000000	11.44666667	103.96213965	0.083222
4	-0.27017844	9.09819980	-2.45813743		4.00000000	8.58500000	78.10804528	0.104710
5	-0.26001525	9.08473010	-2.36216837		5.00000000	6.86800000	62.39392633	0.126104
6	-0.24988404	9.07758430	-2.26834344		6.00000000	5.72333333	51.95404081	0.147456
7	-0.24005204	9.09115220	-2.18234963		7.00000000	4.90571429	44.59859522	0.168826
8	-0.22989555	9.07884220	-2.08718542		8.00000000	4.29250000	38.97093014	0.190362
9	-0.22008438	9.08341500	-1.99911776		9.00000000	3.81555556	34.65827457	0.211751
10	-0.20994425	9.08860400	-1.90810015		10.00000000	3.43400000	31.21026614	0.233118
11	-0.20013607	9.09370040	-1.81997746		11.00000000	3.12181818	28.38887925	0.254504
12	-0.18995649	9.07552810	-1.72395546		12.00000000	2.86166667	25.97113625	0.275985
13	-0.18017213	9.08766750	-1.63734441		13.00000000	2.64153846	24.00542323	0.297373
14	-0.17001562	9.07961180	-1.54367583		14.00000000	2.45285714	22.27099066	0.318740
15	-0.16019925	9.08605190	-1.45557870		15.00000000	2.28933333	20.80100148	0.340106
16	-0.15004572	9.08717160	-1.36349121		16.00000000	2.14625000	19.50334205	0.361590
17	-0.13990410	9.07860850	-1.27013455		17.00000000	2.02000000	18.33878917	0.382964
18	-0.13009146	9.09025380	-1.18256439		18.00000000	1.90777778	17.34218419	0.404342
19	-0.11995207	9.08718680	-1.09002687		19.00000000	1.80736842	16.42389446	0.425702
20	-0.11009476	9.07898430	-0.99954860		20.00000000	1.71700000	15.58861604	0.447175
21	-0.09994570	9.08113860	-0.90762077		21.00000000	1.63523810	14.84982379	0.468554
22	-0.09012114	9.08257100	-0.81853168		22.00000000	1.56090909	14.17706764	0.489940
23	-0.07998101	9.07928940	-0.72617077		23.00000000	1.49304348	13.55577383	0.511421
24	-0.07020335	9.08720870	-0.63795248		24.00000000	1.43083333	13.00228111	0.532817
25	-0.06002079	9.08834360	-0.54548956		25.00000000	1.37360000	12.48374877	0.554169
26	-0.04988512	9.08271410	-0.45309232		26.00000000	1.32076923	11.99616932	0.575536
27	-0.04004122	9.08706670	-0.36385720		27.00000000	1.27185185	11.55740261	0.597021
28	-0.02991523	9.08062460	-0.27164893		28.00000000	1.22642857	11.13673746	0.618407
29	-0.02008472	9.09449100	-0.18266027		29.00000000	1.18413793	10.76913176	0.639764
30	-0.00994458	9.08874890	-0.09038382		30.00000000	1.14466667	10.40358791	0.661144
31	-0.00070280	9.07834820	-0.00638029		31.00000000	1.10774194	10.05646701	0.682735
32	0.00944159	9.08385090	0.08576599		32.00000000	1.07312500	9.74810750	0.704111
33	0.01930233	9.08934590	0.17544558		33.00000000	1.04060606	9.45842843	0.725493
34	0.02942357	9.07987400	0.26716231		34.00000000	1.01000000	9.17067274	0.746874
35	0.03925157	9.08645730	0.35665768		35.00000000	0.98114286	8.91511268	0.768352
36	0.04941299	9.09343150	0.44933366		36.00000000	0.95388889	8.67412327	0.789744
37	0.05916210	9.07843210	0.53709910		37.00000000	0.92810811	8.42576644	0.811082
38	0.06934660	9.08859540	0.63026318		38.00000000	0.90368421	8.21322016	0.832453
39	0.07949165	9.07877730	0.72168701		39.00000000	0.88051282	7.99397981	0.853933
40	0.08930551	9.08547120	0.81138259		40.00000000	0.85850000	7.79987703	0.875311
41	0.09947289	9.07739730	0.90295492		41.00000000	0.83756098	7.60287374	0.896670
42	0.10928972	9.09836670	0.99435795		42.00000000	0.81761905	7.43899792	0.918042
43	0.11944370	9.08417610	1.08504760		43.00000000	0.79860465	7.25466529	0.939518
44	0.12925458	9.06916810	1.17223151		44.00000000	0.78045455	7.07807347	0.960903
45	0.13944876	9.07709690	1.26578991		45.00000000	0.76311111	6.92683350	0.982264
46	0.14922838	9.09101870	1.35663799		46.00000000	0.74652174	6.78664309	1.003623
47	0.15939501	9.07135580	1.44592885		47.00000000	0.73063830	6.62787996	1.025100
48	0.16948573	9.09173970	1.54092014		48.00000000	0.71541667	6.50438211	1.046479
49	0.17935541	9.07980730	1.62851256		49.00000000	0.70081633	6.36327720	1.067854
50	0.18948632	9.07294270	1.71919852		50.00000000	0.68680000	6.23129705	1.089211
51	0.19925627	9.08659080	1.81056019		51.00000000	0.67333333	6.11830447	1.110688
52	0.20942812	9.08342170	1.90232393		52.00000000	0.66038462	5.99855195	1.132128
53	0.21924941	9.07530980	1.98975632		53.00000000	0.64792453	5.88011582	1.153516
54	0.22941977	9.07697010	2.08243639		54.00000000	0.63592593	5.77228062	1.175000
55	0.23920088	9.08226870	2.17248667		55.00000000	0.62436364	5.67063831	1.196390
56	0.24935040	9.07998370	2.26409757		56.00000000	0.61321429	5.56797572	1.217743
57	0.25951928	9.08265110	2.35712307		57.00000000	0.60245614	5.47189893	1.239125
58	0.26934949	9.07738880	2.44499004		58.00000000	0.59206897	5.37444020	1.260619
59	0.27949306	9.07978730	2.53773754		59.00000000	0.58203390	5.28474400	1.282000
60	0.28931510	9.07992080	2.62695819		60.00000000	0.57233333	5.19674134	1.303343
61	0.29947579	9.07818510	2.71869665		61.00000000	0.56295082	5.11057174	1.324725
62	0.30926359	9.08599380	2.80996706		62.00000000	0.55387097	5.03246818	1.346220
63	0.31941015	9.08259770	2.90107389		63.00000000	0.54507937	4.95073659	1.367603
64	0.32926342	9.07333660	2.98751784		64.00000000	0.53656250	4.86841217	1.388971
65	0.33940327	9.07733060	3.08087569		65.00000000	0.52830769	4.79562358	1.410352
66	0.34921935	9.08003900	3.17092532		66.00000000	0.52030303	4.72437181	1.431821
67	0.35937485	9.07946010	3.26292961		67.00000000	0.51253731	4.65356209	1.453208
68	0.36953256	9.07775970	3.35452778		68.00000000	0.50500000	4.58426865	1.474588
69	0.37932333	9.07432460	3.44210302		69.00000000	0.49768116	4.51612039	1.495960
70	0.38949069	9.08133220	3.53709434		70.00000000	0.49057143	4.45504211	1.517443
71	0.39930531	9.06894970	3.62127977		71.00000000	0.48366197	4.38630609	1.538823
72	0.40945408	9.07605080	3.71622603		72.00000000	0.47694444	4.32877201	1.560180
73	0.41925529	9.07904240	3.80643655		73.00000000	0.47041096	4.27088104	1.581558
74	0.42941299	9.06084540	3.89084472		74.00000000	0.46405405	4.20472204	1.603025
75	0.43924174	9.08422950	3.99017277		75.00000000	0.45786667	4.15936588	1.624400
76	0.44935924	9.05398460	4.06849164		76.00000000	0.45184211	4.09097146	1.645763
77	0.45953035	9.07572360	4.17057044		77.00000000	0.44597403	4.04753699	1.667126
78	0.46938217	9.05916500	4.25221053		78.00000000	0.44025641	3.98835546	1.688597
79	0.47951904	9.05218220	4.34069372		79.00000000	0.43468354	3.93483464	1.709972
80	0.48933661	9.03978160	4.42349608		80.00000000	0.42925000	3.88032625	1.731397
81	0.49946827	9.04279990	4.51659162		81.00000000	0.42395062	3.83370060	1.752750
82	0.50931042	9.01471140	4.59128645		82.00000000	0.41878049	3.77518524	1.774214
83	0.51947033	9.00173470	4.67613410		83.00000000	0.41373494	3.72433216	1.795598
84	0.52922463	8.96717740	4.74565114		84.00000000	0.40880952	3.66586752	1.816978
85	0.53936750	8.91986560	4.81108561		85.00000000	0.40400000	3.60362570	1.838463
86	0.54951698	8.86177440	4.86969551		86.00000000	0.39930233	3.53852713	1.859859
87	0.55931300	8.77434440	4.90760489		87.00000000	0.39471264	3.46334467	1.881211
88	0.56949377	8.64411070	4.92276719		88.00000000	0.39022727	3.37316774	1.902588
89	0.57930982	8.47068790	4.90715268		89.00000000	0.38584270	3.26835306	1.924077
90	0.58942884	8.22439480	4.84769549		90.00000000	0.38155556	3.13806353	1.945467
91	0.59923154	7.90067200	4.73433185		91.00000000	0.37736264	2.98141842	1.966813
92	0.60928804	7.42242620	4.52239551		92.00000000	0.37326087	2.77050126	1.988295
93	0.61916071	6.83894920	4.23440864		93.00000000	0.36924731	2.52526361	2.009801
94	0.62925887	6.02192400	3.78934909		94.00000000	0.36531915	2.19992415	2.031183
95	0.63936818	4.93528410	3.15546361		95.00000000	0.36147368	1.78397533	2.052545
96	0.64912772	3.63257360	2.35800422		96.00000000	0.35770833	1.29940185	2.073918
97	0.65919608	1.94615810	1.28289979		97.00000000	0.35402062	0.68898009	2.095384
98	0.66898018	-0.06750966	-0.04516262		98.00000000	0.35040816	-0.02365594	2.116768
99	0.67907089	-2.52976270	-1.71788821		99.00000000	0.34686869	-0.87749547	2.138111
100	0.68877161	-5.36486530	-3.69516691		100.00000000	0.34340000	-1.84229474	2.159487
101	0.69907522	-8.80241200	-6.15354811		101.00000000	0.34000000	-2.99282008	2.180965
