# Supplementary material for: Study on the Electrical Injection Regeneration of Industrialized B-Doped Czochralski Silicon PERC Solar Cells
Source: Hindawi journal article supplement (doi:10.1155/2019/5357370), 2019-06-20
Supplement: f1 [file 5357370.f1.zip › section3.3/IVRawData_3-8-7h.csv]

05:58 04/04/2018
Test Lot:	JK-PERC
Recipe:	Recipe_YJX-LID
Cell Name:	3-8-7h
Test Order:	2
Test Condition:	Light
1	-0.29989466	9.08051490	-2.72319793		1.00000000	34.34000000	311.82488167	0.000000
2	-0.29010746	9.09082410	-2.63731589		2.00000000	17.17000000	156.08944980	0.061805
3	-0.27995256	9.08278660	-2.54274936		3.00000000	11.44666667	103.96763061	0.083218
4	-0.27008942	9.08257290	-2.45310685		4.00000000	8.58500000	77.97388835	0.104703
5	-0.25997770	9.09631920	-2.36484014		5.00000000	6.86800000	62.47352027	0.126131
6	-0.24983026	9.08772660	-2.27038910		6.00000000	5.72333333	52.01208857	0.147481
7	-0.24001476	9.08495620	-2.18052358		7.00000000	4.90571429	44.56819942	0.168854
8	-0.22987029	9.09748080	-2.09124055		8.00000000	4.29250000	39.05093633	0.190377
9	-0.22008903	9.08091550	-1.99860988		9.00000000	3.81555556	34.64873759	0.211764
10	-0.20989098	9.09027960	-1.90796769		10.00000000	3.43400000	31.21602015	0.233121
11	-0.20009109	9.09342860	-1.81951404		11.00000000	3.12181818	28.38803074	0.254500
12	-0.18991239	9.09415820	-1.72709332		12.00000000	2.86166667	26.02444938	0.275994
13	-0.18014081	9.09075550	-1.63761606		13.00000000	2.64153846	24.01358030	0.297367
14	-0.17001420	9.08989430	-1.54541111		14.00000000	2.45285714	22.29621216	0.318746
15	-0.16019721	9.09275820	-1.45663449		15.00000000	2.28933333	20.81635444	0.340115
16	-0.15004306	9.08741570	-1.36350366		16.00000000	2.14625000	19.50386595	0.361591
17	-0.13987328	9.09477040	-1.27211537		17.00000000	2.02000000	18.37143621	0.382983
18	-0.13009501	9.07423690	-1.18051294		18.00000000	1.90777778	17.31162751	0.404362
19	-0.11994085	9.09972570	-1.09142884		19.00000000	1.80736842	16.44655687	0.425725
20	-0.11006730	9.08500290	-0.99996174		20.00000000	1.71700000	15.59894998	0.447205
21	-0.09994888	9.09844020	-0.90937887		21.00000000	1.63523810	14.87811602	0.468579
22	-0.09015943	9.07750420	-0.81842261		22.00000000	1.56090909	14.16915883	0.489970
23	-0.07993607	9.09797000	-0.72725592		23.00000000	1.49304348	13.58366477	0.511458
24	-0.07016596	9.07474420	-0.63673816		24.00000000	1.43083333	12.98444649	0.532836
25	-0.06004605	9.07315730	-0.54480729		25.00000000	1.37360000	12.46288887	0.554210
26	-0.04983088	9.08388610	-0.45265804		26.00000000	1.32076923	11.99771726	0.575585
27	-0.04010916	9.08052350	-0.36421215		27.00000000	1.27185185	11.54908063	0.597057
28	-0.02989696	9.08990570	-0.27176053		28.00000000	1.22642857	11.14812006	0.618449
29	-0.02010527	9.08605100	-0.18267754		29.00000000	1.18413793	10.75913763	0.639792
30	-0.00991764	9.07893280	-0.09004155		30.00000000	1.14466667	10.39235175	0.661168
31	-0.00067002	9.09025960	-0.00609064		31.00000000	1.10774194	10.06966176	0.682768
32	0.00947424	9.09044650	0.08612512		32.00000000	1.07312500	9.75518540	0.704150
33	0.01930807	9.09156320	0.17554056		33.00000000	1.04060606	9.46073577	0.725502
34	0.02944853	9.07532020	0.26725486		34.00000000	1.01000000	9.16607340	0.746879
35	0.03926747	9.09297660	0.35705821		35.00000000	0.98114286	8.92150904	0.768352
36	0.04939231	9.08830550	0.44889236		36.00000000	0.95388889	8.66923364	0.789736
37	0.05923357	9.07854270	0.53775451		37.00000000	0.92810811	8.42586909	0.811087
38	0.06939190	9.08529000	0.63044553		38.00000000	0.90368421	8.21023312	0.832457
39	0.07955989	9.09342380	0.72347182		39.00000000	0.88051282	8.00687624	0.853935
40	0.08937065	9.08499620	0.81193198		40.00000000	0.85850000	7.79946924	0.875321
41	0.09952227	9.08946040	0.90460373		41.00000000	0.83756098	7.61297732	0.896672
42	0.10930921	9.08697030	0.99328954		42.00000000	0.81761905	7.42968000	0.918048
43	0.11945339	9.08157160	1.08482451		43.00000000	0.79860465	7.25258532	0.939529
44	0.12928572	9.08828740	1.17498578		44.00000000	0.78045455	7.09299521	0.960906
45	0.13944778	9.08639430	1.26707751		45.00000000	0.76311111	6.93392845	0.982275
46	0.14929202	9.07960890	1.35551315		46.00000000	0.74652174	6.77812543	1.003645
47	0.15940420	9.08251480	1.44779101		47.00000000	0.73063830	6.63603315	1.025117
48	0.16951266	9.07810210	1.53885323		48.00000000	0.71541667	6.49462554	1.046500
49	0.17936212	9.09095100	1.63057224		49.00000000	0.70081633	6.37108688	1.067885
50	0.18947950	9.06814860	1.71822826		50.00000000	0.68680000	6.22800446	1.089242
51	0.19929472	9.08992770	1.81157460		51.00000000	0.67333333	6.12055132	1.110724
52	0.20942402	9.08053210	1.90168154		52.00000000	0.66038462	5.99664370	1.132097
53	0.21926603	9.07473950	1.98978210		53.00000000	0.64792453	5.87974631	1.153489
54	0.22937150	9.09761140	2.08673277		54.00000000	0.63592593	5.78540695	1.174962
55	0.23919566	9.08494760	2.17308004		55.00000000	0.62436364	5.67231092	1.196348
56	0.24940757	9.08479600	2.26581689		56.00000000	0.61321429	5.57092669	1.217708
57	0.25948849	9.09005930	2.35876576		57.00000000	0.60245614	5.47636204	1.239089
58	0.26933497	9.06999300	2.44286629		58.00000000	0.59206897	5.37006137	1.260563
59	0.27952382	9.09001640	2.54087611		59.00000000	0.58203390	5.29069768	1.281946
60	0.28931594	9.07428840	2.62533628		60.00000000	0.57233333	5.19351773	1.303310
61	0.29950330	9.07852550	2.71904835		61.00000000	0.56295082	5.11076337	1.324685
62	0.30922401	9.08583740	2.80955908		62.00000000	0.55387097	5.03238155	1.346178
63	0.31939721	9.07291700	2.89786438		63.00000000	0.54507937	4.94545984	1.367554
64	0.32925114	9.08719730	2.99197007		64.00000000	0.53656250	4.87584930	1.388918
65	0.33937225	9.07733250	3.08059475		65.00000000	0.52830769	4.79562459	1.410294
66	0.34929091	9.07850270	3.17103847		66.00000000	0.52030303	4.72357247	1.431768
67	0.35934207	9.08813190	3.26574813		67.00000000	0.51253731	4.65800671	1.453159
68	0.36955693	9.07834910	3.35496682		68.00000000	0.50500000	4.58456630	1.474505
69	0.37939376	9.07161330	3.44171348		69.00000000	0.49768116	4.51477102	1.495878
70	0.38952529	9.07426360	3.53465516		70.00000000	0.49057143	4.45157446	1.517355
71	0.39933306	9.07905480	3.62556674		71.00000000	0.48366197	4.39119355	1.538733
72	0.40947500	9.07958700	3.71786389		72.00000000	0.47694444	4.33045858	1.560086
73	0.41933563	9.07273480	3.80452096		73.00000000	0.47041096	4.26791388	1.581464
74	0.42945451	9.06986810	3.89509576		74.00000000	0.46405405	4.20890906	1.602938
75	0.43929949	9.07112790	3.98494186		75.00000000	0.45786667	4.15336709	1.624314
76	0.44940424	9.07745740	4.07944784		76.00000000	0.45184211	4.10157746	1.645694
77	0.45952162	9.06219770	4.16427577		77.00000000	0.44597403	4.04150479	1.667061
78	0.46940309	9.06781670	4.25646118		78.00000000	0.44025641	3.99216443	1.688539
79	0.47952867	9.05494310	4.34210482		79.00000000	0.43468354	3.93603476	1.709919
80	0.48939076	9.04341410	4.42576330		80.00000000	0.42925000	3.88188550	1.731303
81	0.49949774	9.04104330	4.51598070		81.00000000	0.42395062	3.83295589	1.752674
82	0.50930327	9.03131870	4.59968015		82.00000000	0.41878049	3.78214005	1.774158
83	0.51949286	8.99298290	4.67179041		83.00000000	0.41373494	3.72071124	1.795532
84	0.52927387	8.97027970	4.74773465		84.00000000	0.40880952	3.66713577	1.816930
85	0.53936964	8.92274860	4.81265970		85.00000000	0.40400000	3.60479043	1.838419
86	0.54952645	8.85672950	4.86700712		86.00000000	0.39930233	3.53651269	1.859791
87	0.55937594	8.77797220	4.91018645		87.00000000	0.39471264	3.46477661	1.881147
88	0.56945163	8.62926200	4.91394731		88.00000000	0.39022727	3.36737338	1.902524
89	0.57928026	8.46873470	4.90577084		89.00000000	0.38584270	3.26759943	1.924010
90	0.58941251	8.21528820	4.84219364		90.00000000	0.38155556	3.13458885	1.945413
91	0.59920543	7.88722560	4.72606841		91.00000000	0.37736264	2.97634425	1.966764
92	0.60929674	7.42730950	4.52543547		92.00000000	0.37326087	2.77232400	1.988241
93	0.61917228	6.81742330	4.22115953		93.00000000	0.36924731	2.51731523	2.009746
94	0.62926066	5.99596930	3.77302760		94.00000000	0.36531915	2.19044240	2.031134
95	0.63938028	4.93439870	3.15495722		95.00000000	0.36147368	1.78365528	2.052509
96	0.64911735	3.60608910	2.34077500		96.00000000	0.35770833	1.28992812	2.073893
97	0.65922058	1.93967700	1.27867500		97.00000000	0.35402062	0.68668565	2.095385
98	0.66896284	-0.05254158	-0.03514836		98.00000000	0.35040816	-0.01841100	2.116775
99	0.67906088	-2.49017760	-1.69098219		99.00000000	0.34686869	-0.86376463	2.138122
100	0.68881732	-5.27723740	-3.63505252		100.00000000	0.34340000	-1.81220332	2.159499
101	0.69908130	-8.65361310	-6.04957910		101.00000000	0.34000000	-2.94222845	2.180981
05:58 04/04/2018
Test Lot:	JK-PERC
Recipe:	Recipe_YJX-LID
Cell Name:	3-8-7h
Test Order:	3
Test Condition:	Light
1	-0.29988873	9.08473590	-2.72440991		1.00000000	34.34000000	311.96983081	0.000000
2	-0.29008514	9.08861060	-2.63647088		2.00000000	17.17000000	156.05144400	0.021588
3	-0.27991834	9.07917500	-2.54142759		3.00000000	11.44666667	103.92628983	0.042995
4	-0.27013409	9.08233260	-2.45344765		4.00000000	8.58500000	77.97182537	0.064354
5	-0.25999707	9.08675860	-2.36253061		5.00000000	6.86800000	62.40785806	0.085748
6	-0.24986821	9.08355620	-2.26969193		6.00000000	5.72333333	51.98821998	0.107236
7	-0.23998573	9.07728580	-2.17841906		7.00000000	4.90571429	44.53057062	0.128612
8	-0.22985615	9.08368300	-2.08794040		8.00000000	4.29250000	38.99170928	0.149963
9	-0.22005405	9.07951350	-1.99798372		9.00000000	3.81555556	34.64338818	0.171336
10	-0.20988055	9.08010100	-1.90573659		10.00000000	3.43400000	31.18106683	0.192853
11	-0.20004942	9.07589050	-1.81562663		11.00000000	3.12181818	28.33327998	0.214250
12	-0.18997045	9.07619090	-1.72420807		12.00000000	2.86166667	25.97303296	0.235606
13	-0.18018323	9.09511470	-1.63878714		13.00000000	2.64153846	24.02509529	0.256977
14	-0.16998294	9.07885460	-1.54325040		14.00000000	2.45285714	22.26913335	0.278470
15	-0.16017041	9.08485600	-1.45512511		15.00000000	2.28933333	20.79826367	0.299842
16	-0.15003338	9.08641150	-1.36326503		16.00000000	2.14625000	19.50171068	0.321193
17	-0.13988593	9.08603760	-1.27100882		17.00000000	2.02000000	18.35379595	0.342578
18	-0.13012329	9.08184340	-1.18175934		18.00000000	1.90777778	17.32613902	0.364056
19	-0.11992076	9.08736230	-1.08976339		19.00000000	1.80736842	16.42421165	0.385454
20	-0.11013205	9.07570080	-0.99952553		20.00000000	1.71700000	15.58297827	0.406801
21	-0.09997939	9.09783460	-0.90959598		21.00000000	1.63523810	14.87712572	0.428169
22	-0.09015869	9.07854750	-0.81850991		22.00000000	1.56090909	14.17078733	0.449652
23	-0.07998295	9.08150290	-0.72636540		23.00000000	1.49304348	13.55907868	0.471024
24	-0.07019276	9.08526330	-0.63771972		24.00000000	1.43083333	12.99949757	0.492399
25	-0.06001405	9.08517270	-0.54523801		25.00000000	1.37360000	12.47939322	0.513749
26	-0.04985097	9.09269810	-0.45327986		26.00000000	1.32076923	12.00935588	0.535224
27	-0.04008237	9.08469200	-0.36413594		27.00000000	1.27185185	11.55438234	0.556619
28	-0.02992375	9.08743290	-0.27193009		28.00000000	1.22642857	11.14508735	0.578015
29	-0.02004797	9.07935710	-0.18202264		29.00000000	1.18413793	10.75121113	0.599444
30	-0.00996825	9.08614060	-0.09057290		30.00000000	1.14466667	10.40060227	0.620907
31	-0.00066853	9.09000110	-0.00607693		31.00000000	1.10774194	10.06937541	0.642399
32	0.00945787	9.07578560	0.08583761		32.00000000	1.07312500	9.73945242	0.663786
33	0.01928574	9.07909680	0.17509714		33.00000000	1.04060606	9.44776315	0.685147
34	0.02940016	9.08285140	0.26703724		34.00000000	1.01000000	9.17367991	0.706646
35	0.03929203	9.08184340	0.35684410		35.00000000	0.98114286	8.91058578	0.728021
36	0.04938858	9.08583350	0.44873645		36.00000000	0.95388889	8.66687562	0.749386
37	0.05919189	9.08927540	0.53801143		37.00000000	0.92810811	8.43583020	0.770754
38	0.06939413	9.09027480	0.63081168		38.00000000	0.90368421	8.21473781	0.792230
39	0.07959934	9.08574870	0.72321956		39.00000000	0.88051282	8.00011821	0.813637
40	0.08935353	9.08051200	0.81137582		40.00000000	0.85850000	7.79561955	0.835022
41	0.09956767	9.09715370	0.90578243		41.00000000	0.83756098	7.61942093	0.856370
42	0.10927200	9.06728270	0.99080012		42.00000000	0.81761905	7.41358305	0.877851
43	0.11940427	9.09378620	1.08583690		43.00000000	0.79860465	7.26233996	0.899221
44	0.12934081	9.07449530	1.17370257		44.00000000	0.78045455	7.08223110	0.920608
45	0.13948797	9.09242920	1.26828449		45.00000000	0.76311111	6.93853375	0.942105
46	0.14927341	9.08425710	1.35603803		46.00000000	0.74652174	6.78159541	0.963478
47	0.15942727	9.08164310	1.44786157		47.00000000	0.73063830	6.63539626	0.984835
48	0.16958188	9.08795640	1.54115273		48.00000000	0.71541667	6.50167547	1.006209
49	0.17934500	9.08310220	1.62900896		49.00000000	0.70081633	6.36558632	1.027693
50	0.18953830	9.07361130	1.71979686		50.00000000	0.68680000	6.23175624	1.049077
51	0.19935575	9.07434370	1.80902259		51.00000000	0.67333333	6.11005809	1.070435
52	0.20947015	9.09085750	1.90426328		52.00000000	0.66038462	6.00346243	1.091808
53	0.21923998	9.07303330	1.98917164		53.00000000	0.64792453	5.87864082	1.113293
54	0.22942510	9.07252310	2.08146452		54.00000000	0.63592593	5.76945265	1.134672
55	0.23922022	9.07680510	2.17135531		55.00000000	0.62436364	5.66722704	1.156016
56	0.24939120	9.08849910	2.26659170		56.00000000	0.61321429	5.57319748	1.177389
57	0.25952643	9.07289310	2.35465556		57.00000000	0.60245614	5.46602016	1.198876
58	0.26937664	9.08554170	2.44743270		58.00000000	0.59206897	5.37926728	1.220251
59	0.27945235	9.08233070	2.53807866		59.00000000	0.58203390	5.28622434	1.241609
60	0.28935689	9.06671520	2.62351651		60.00000000	0.57233333	5.18918333	1.262984
61	0.29951149	9.08548360	2.72120673		61.00000000	0.56295082	5.11468044	1.284457
62	0.30927387	9.06781010	2.80443672		62.00000000	0.55387097	5.02239676	1.305839
63	0.31946123	9.08293150	2.90164447		63.00000000	0.54507937	4.95091854	1.327184
64	0.32922658	9.07476620	2.98765424		64.00000000	0.53656250	4.86917924	1.348564
65	0.33938935	9.08797170	3.08436081		65.00000000	0.52830769	4.80124536	1.370049
66	0.34914875	9.08344940	3.17147500		66.00000000	0.52030303	4.72614625	1.391427
67	0.35938224	9.08132930	3.26366847		67.00000000	0.51253731	4.65452012	1.412803
68	0.36957183	9.07251930	3.35294756		68.00000000	0.50500000	4.58162225	1.434181
69	0.37931785	9.07504650	3.44232713		69.00000000	0.49768116	4.51647966	1.455672
70	0.38945606	9.07561020	3.53455139		70.00000000	0.49057143	4.45223506	1.477066
71	0.39930105	9.06156160	3.61829106		71.00000000	0.48366197	4.38273275	1.498450
72	0.40945715	9.07718750	3.71671932		72.00000000	0.47694444	4.32931415	1.519783
73	0.41927534	9.07185170	3.80360371		73.00000000	0.47041096	4.26749846	1.541258
74	0.42944854	9.06863590	3.89451245		74.00000000	0.46405405	4.20833725	1.562643
75	0.43925929	9.07565880	3.98656744		75.00000000	0.45786667	4.15544164	1.584029
76	0.44937670	9.07855610	4.07969158		76.00000000	0.45184211	4.10207390	1.605526
77	0.45962358	9.06461430	4.16631048		77.00000000	0.44597403	4.04258253	1.626896
78	0.46945295	9.06413840	4.25518651		78.00000000	0.44025641	3.99054503	1.648261
79	0.47958595	9.05353930	4.34195025		79.00000000	0.43468354	3.93542455	1.669646
80	0.48935875	9.04790400	4.42767099		80.00000000	0.42925000	3.88381279	1.691161
81	0.49950889	9.04029560	4.51570802		81.00000000	0.42395062	3.83263890	1.712568
82	0.50930697	9.02622700	4.59712032		82.00000000	0.41878049	3.78000775	1.733919
83	0.51948464	8.99682810	4.67371401		83.00000000	0.41373494	3.72230213	1.755289
84	0.52923214	8.97232910	4.74844493		84.00000000	0.40880952	3.66797359	1.776820
85	0.53936893	8.92054840	4.81146665		85.00000000	0.40400000	3.60390155	1.798202
86	0.54957289	8.84744640	4.86231669		86.00000000	0.39930233	3.53280592	1.819555
87	0.55936414	8.77301220	4.90730842		87.00000000	0.39471264	3.46281884	1.881249
88	0.56955361	8.64462280	4.92357612		88.00000000	0.39022727	3.37336758	1.902644
89	0.57930243	8.48780920	4.91700849		89.00000000	0.38584270	3.27495919	1.924034
90	0.58945394	8.21957020	4.84505804		90.00000000	0.38155556	3.13622267	1.945523
91	0.59928316	7.89547590	4.73162575		91.00000000	0.37736264	2.97945761	1.966896
92	0.60934985	7.44100000	4.53417223		92.00000000	0.37326087	2.77743413	1.988363
93	0.61914408	6.82326220	4.22458240		93.00000000	0.36924731	2.51947123	2.009764
94	0.62928438	6.02063660	3.78869257		94.00000000	0.36531915	2.19945384	2.031260
95	0.63945526	4.93602320	3.15636600		95.00000000	0.36147368	1.78424249	2.052667
96	0.64914083	3.62927530	2.35591078		96.00000000	0.35770833	1.29822202	2.074036
97	0.65923649	1.93516020	1.27572822		97.00000000	0.35402062	0.68508661	2.095408
98	0.66899055	-0.07211409	-0.04824364		98.00000000	0.35040816	-0.02526937	2.116893
99	0.67910784	-2.53774000	-1.72339913		99.00000000	0.34686869	-0.88026254	2.138276
100	0.68882394	-5.36038590	-3.69236214		100.00000000	0.34340000	-1.84075652	2.159661
101	0.69906402	-8.81021880	-6.15890697		101.00000000	0.34000000	-2.99547439	2.181013
05:58 04/04/2018
Test Lot:	JK-PERC
Recipe:	Recipe_YJX-LID
Cell Name:	3-8-7h
Test Order:	4
Test Condition:	Light
1	-0.29987806	9.08365920	-2.72399010		1.00000000	34.34000000	311.93285693	0.000000
2	-0.29005376	9.08642290	-2.63555113		2.00000000	17.17000000	156.01388119	0.021582
3	-0.27993545	9.07400320	-2.54013517		3.00000000	11.44666667	103.86708996	0.042999
4	-0.27012604	9.09167670	-2.45589862		4.00000000	8.58500000	78.05204447	0.064415
5	-0.25996011	9.07752610	-2.35979468		5.00000000	6.86800000	62.34444925	0.085822
6	-0.24984631	9.07884600	-2.26831617		6.00000000	5.72333333	51.96126194	0.107314
7	-0.23998627	9.09044460	-2.18158189		7.00000000	4.90571429	44.59512394	0.128681
8	-0.22983897	9.08069320	-2.08709717		8.00000000	4.29250000	38.97887556	0.150041
9	-0.22002731	9.08043290	-1.99794322		9.00000000	3.81555556	34.64689620	0.171412
10	-0.20985097	9.09004780	-1.90755535		10.00000000	3.43400000	31.21522415	0.192878
11	-0.20003113	9.08257960	-1.81679866		11.00000000	3.12181818	28.35416213	0.214247
12	-0.18989350	9.09243580	-1.72659446		12.00000000	2.86166667	26.01952045	0.235581
13	-0.18011087	9.07277770	-1.63410588		13.00000000	2.64153846	23.96609125	0.256963
14	-0.16995016	9.09001450	-1.54484942		14.00000000	2.45285714	22.29650700	0.278437
15	-0.16013703	9.08545490	-1.45491776		15.00000000	2.28933333	20.79963475	0.299818
16	-0.15001874	9.08555320	-1.36300324		16.00000000	2.14625000	19.49986856	0.321181
17	-0.13984090	9.08361720	-1.27026120		17.00000000	2.02000000	18.34890674	0.342552
18	-0.13002479	9.09566310	-1.18266168		18.00000000	1.90777778	17.35250394	0.364027
19	-0.11989236	9.07985880	-1.08860570		19.00000000	1.80736842	16.41065006	0.385402
20	-0.11007773	9.07870770	-0.99936353		20.00000000	1.71700000	15.58814112	0.406743
21	-0.09988949	9.10604190	-0.90959785		21.00000000	1.63523810	14.89054661	0.428101
22	-0.09009421	9.06872270	-0.81703940		22.00000000	1.56090909	14.15545171	0.449580
23	-0.07993052	9.09692860	-0.72712225		23.00000000	1.49304348	13.58210992	0.470952
24	-0.07009952	9.06049820	-0.63513656		24.00000000	1.43083333	12.96406284	0.492331
25	-0.05995891	9.09786610	-0.54549809		25.00000000	1.37360000	12.49682887	0.513685
26	-0.04983987	9.07585050	-0.45233924		26.00000000	1.32076923	11.98710408	0.535162
27	-0.04002003	9.08300300	-0.36350209		27.00000000	1.27185185	11.55223419	0.556553
28	-0.02986528	9.08517930	-0.27133141		28.00000000	1.22642857	11.14232347	0.577932
29	-0.02005288	9.07732580	-0.18202656		29.00000000	1.18413793	10.74880579	0.599270
30	-0.00987059	9.08324050	-0.08965693		30.00000000	1.14466667	10.39728263	0.620736
31	-0.00065584	9.07816700	-0.00595382		31.00000000	1.10774194	10.05626628	0.642217
32	0.00952476	9.08041290	0.08648874		32.00000000	1.07312500	9.74441809	0.663594
33	0.01928031	9.08742710	0.17520842		33.00000000	1.04060606	9.45643172	0.685079
34	0.02944594	9.09231760	0.26773185		34.00000000	1.01000000	9.18324078	0.706450
35	0.03923648	9.08495430	0.35646158		35.00000000	0.98114286	8.91363802	0.727800
36	0.04941252	9.08203030	0.44876602		36.00000000	0.95388889	8.66324779	0.749190
37	0.05925441	9.08995060	0.53861964		37.00000000	0.92810811	8.43645685	0.770659
38	0.06942228	9.08373260	0.63061338		38.00000000	0.90368421	8.20882572	0.792058
39	0.07951273	9.07549670	0.72161752		39.00000000	0.88051282	7.99109120	0.813406
40	0.08933080	9.08822350	0.81185828		40.00000000	0.85850000	7.80223987	0.834783
41	0.09949271	9.06581210	0.90198225		41.00000000	0.83756098	7.59317043	0.856259
42	0.10931674	9.09355550	0.99407784		42.00000000	0.81761905	7.43506419	0.877624
43	0.11943920	9.08357720	1.08493519		43.00000000	0.79860465	7.25418700	0.898961
44	0.12929150	9.07862570	1.17378913		44.00000000	0.78045455	7.08545469	0.920337
45	0.13945714	9.08127780	1.26644903		45.00000000	0.76311111	6.93002399	0.941819
46	0.14927892	9.08893110	1.35678582		46.00000000	0.74652174	6.78508465	0.963188
47	0.15940139	9.07426640	1.44645068		47.00000000	0.73063830	6.63000656	0.984546
48	0.16961168	9.07936860	1.53996696		48.00000000	0.71541667	6.49553162	1.005921
49	0.17939626	9.08103750	1.62910416		49.00000000	0.70081633	6.36413934	1.027391
50	0.18954626	9.07619380	1.72035859		50.00000000	0.68680000	6.23352990	1.048797
51	0.19934349	9.07669830	1.80938072		51.00000000	0.67333333	6.11164352	1.070140
52	0.20948604	9.07963560	1.90205691		52.00000000	0.66038462	5.99605166	1.091561
53	0.21931081	9.07907770	1.99113988		53.00000000	0.64792453	5.88255714	1.113047
54	0.22946155	9.08440690	2.08452209		54.00000000	0.63592593	5.77700987	1.134415
55	0.23927665	9.07135770	2.17056408		55.00000000	0.62436364	5.66382588	1.155787
56	0.24945642	9.07906150	2.26483018		56.00000000	0.61321429	5.56741021	1.177157
57	0.25959006	9.07851220	2.35669153		57.00000000	0.60245614	5.46940542	1.198622
58	0.26940587	9.07166960	2.44396104		58.00000000	0.59206897	5.37105404	1.220017
59	0.27956259	9.09077360	2.54144021		59.00000000	0.58203390	5.29113840	1.241396
60	0.28938213	9.05597400	2.62063705		60.00000000	0.57233333	5.18303579	1.262743
61	0.29952171	9.09113600	2.72299260		61.00000000	0.56295082	5.11786246	1.284202
62	0.30933532	9.07196710	2.80627985		62.00000000	0.55387097	5.02469920	1.305587
63	0.31946003	9.08071040	2.90092402		63.00000000	0.54507937	4.94970786	1.326969
64	0.32928926	9.06396480	2.98466626		64.00000000	0.53656250	4.86338361	1.348453
65	0.33943182	9.07759760	3.08122547		65.00000000	0.52830769	4.79576464	1.369834
66	0.34927371	9.08576200	3.17341780		66.00000000	0.52030303	4.72734950	1.391179
67	0.35937831	9.07808690	3.26246753		67.00000000	0.51253731	4.65285827	1.412560
68	0.36951864	9.08193490	3.35594423		68.00000000	0.50500000	4.58637712	1.434046
69	0.37935159	9.08311180	3.44569290		69.00000000	0.49768116	4.52049361	1.455440
70	0.38951126	9.07431510	3.53454791		70.00000000	0.49057143	4.45159972	1.476787
71	0.39933828	9.08419130	3.62766533		71.00000000	0.48366197	4.39367788	1.498152
72	0.40945774	9.07480720	3.71575005		72.00000000	0.47694444	4.32817888	1.519641
73	0.41932121	9.08579350	3.80986592		73.00000000	0.47041096	4.27405683	1.541080
74	0.42944741	9.06500910	3.89294468		74.00000000	0.46405405	4.20665422	1.562443
75	0.43929598	9.08109570	3.98928884		75.00000000	0.45786667	4.15793102	1.583824
76	0.44940951	9.06646440	4.07455532		76.00000000	0.45184211	4.09661036	1.605303
77	0.45954016	9.06425860	4.16539085		77.00000000	0.44597403	4.04242390	1.626677
78	0.46941704	9.05900480	4.25245122		78.00000000	0.44025641	3.98828493	1.648045
79	0.47959235	9.05311010	4.34180235		79.00000000	0.43468354	3.93523799	1.669424
80	0.48939329	9.04685970	4.42747243		80.00000000	0.42925000	3.88336453	1.690905
81	0.49956712	9.03703210	4.51460410		81.00000000	0.42395062	3.83125534	1.712282
82	0.50934720	9.02355770	4.59612385		82.00000000	0.41878049	3.77888990	1.733627
83	0.51953793	8.99485680	4.67316928		83.00000000	0.41373494	3.72148654	1.755003
84	0.52929366	8.97348880	4.74961073		84.00000000	0.40880952	3.66844768	1.816692
85	0.53947437	8.91810230	4.81108762		85.00000000	0.40400000	3.60291333	1.838111
86	0.54958141	8.86057950	4.86960978		86.00000000	0.39930233	3.53805000	1.859598
87	0.55938852	8.76561640	4.90338518		87.00000000	0.39471264	3.45989962	1.880990
88	0.56958258	8.64244370	4.92258538		88.00000000	0.39022727	3.37251723	1.902382
89	0.57936513	8.47648330	4.91097885		89.00000000	0.38584270	3.27058917	1.923738
90	0.58949667	8.21415810	4.84221885		90.00000000	0.38155556	3.13415766	1.945222
91	0.59928817	7.89207170	4.72962521		91.00000000	0.37736264	2.97817299	1.966598
92	0.60943836	7.43619440	4.53190212		92.00000000	0.37326087	2.77564039	1.988078
93	0.61920595	6.82492970	4.22603708		93.00000000	0.36924731	2.52008695	2.009486
94	0.62930405	6.00377180	3.77819791		94.00000000	0.36531915	2.19329280	2.030979
95	0.63938355	4.94216870	3.15994137		95.00000000	0.36147368	1.78646393	2.052415
96	0.64922488	3.61738850	2.34849861		96.00000000	0.35770833	1.29397001	2.073814
97	0.65933484	1.91700850	1.26395049		97.00000000	0.35402062	0.67866053	2.095295
98	0.66905266	-0.06455394	-0.04318998		98.00000000	0.35040816	-0.02262023	2.116682
99	0.67912543	-2.53096250	-1.71884100		99.00000000	0.34686869	-0.87791164	2.138039
100	0.68879926	-5.37128070	-3.69973417		100.00000000	0.34340000	-1.84449779	2.159405
101	0.69911993	-8.80203820	-6.15368033		101.00000000	0.34000000	-2.99269299	2.180903
