# Supplementary material for: Study on the Electrical Injection Regeneration of Industrialized B-Doped Czochralski Silicon PERC Solar Cells
Source: Hindawi journal article supplement (doi:10.1155/2019/5357370), 2019-06-20
Supplement: f1 [file 5357370.f1.zip › section3.3/IVRawData_3-8-8h.csv]

06:59 04/04/2018
Test Lot:	JK-PERC
Recipe:	Recipe_YJX-LID
Cell Name:	3-8-8h
Test Order:	2
Test Condition:	Light
1	-0.29989243	9.09891610	-2.72869606		1.00000000	34.34000000	312.45677887	0.000000
2	-0.29016417	9.09031300	-2.63768313		2.00000000	17.17000000	156.08067421	0.061798
3	-0.27997297	9.10694690	-2.54969897		3.00000000	11.44666667	104.24418552	0.083226
4	-0.27013159	9.09284310	-2.45626416		4.00000000	8.58500000	78.06205801	0.104728
5	-0.26000816	9.09160800	-2.36389227		5.00000000	6.86800000	62.44116374	0.126120
6	-0.24983184	9.09987350	-2.27343814		6.00000000	5.72333333	52.08160933	0.147463
7	-0.24003735	9.09964660	-2.18425506		7.00000000	4.90571429	44.64026632	0.168878
8	-0.22989008	9.08114530	-2.08766522		8.00000000	4.29250000	38.98081620	0.190357
9	-0.22003159	9.09593680	-2.00139344		9.00000000	3.81555556	34.70605219	0.211736
10	-0.20990293	9.09898950	-1.90990456		10.00000000	3.43400000	31.24592994	0.233119
11	-0.20007047	9.09091380	-1.81882340		11.00000000	3.12181818	28.38017999	0.254467
12	-0.18991576	9.09989360	-1.72821321		12.00000000	2.86166667	26.04086219	0.275945
13	-0.18014881	9.09829330	-1.63904671		13.00000000	2.64153846	24.03349169	0.297308
14	-0.16999856	9.09682270	-1.54644676		14.00000000	2.45285714	22.31320654	0.318697
15	-0.16018322	9.09934810	-1.45756288		15.00000000	2.28933333	20.83144092	0.340107
16	-0.15002404	9.09079650	-1.36383802		16.00000000	2.14625000	19.51112199	0.361573
17	-0.13988496	9.09480190	-1.27222600		17.00000000	2.02000000	18.37149984	0.382953
18	-0.13005996	9.09661100	-1.18310486		18.00000000	1.90777778	17.35431232	0.404312
19	-0.11992757	9.09340190	-1.09054959		19.00000000	1.80736842	16.43512743	0.425685
20	-0.11007354	9.09449480	-1.00106324		20.00000000	1.71700000	15.61524757	0.447180
21	-0.09992404	9.09928130	-0.90923690		21.00000000	1.63523810	14.87949142	0.468568
22	-0.09012508	9.08939170	-0.81918212		22.00000000	1.56090909	14.18771414	0.489946
23	-0.07993092	9.10000040	-0.72737137		23.00000000	1.49304348	13.58669625	0.511305
24	-0.07012824	9.09110740	-0.63754336		24.00000000	1.43083333	13.00785950	0.532785
25	-0.06000032	9.09281920	-0.54557205		25.00000000	1.37360000	12.48989645	0.554162
26	-0.04984561	9.09437470	-0.45331462		26.00000000	1.32076923	12.01157028	0.575541
27	-0.04003698	9.09080030	-0.36396815		27.00000000	1.27185185	11.56215120	0.596883
28	-0.02992171	9.08896450	-0.27195733		28.00000000	1.22642857	11.14696575	0.618349
29	-0.02007363	9.08866690	-0.18244252		29.00000000	1.18413793	10.76223522	0.639720
30	-0.00993529	9.10236070	-0.09043458		30.00000000	1.14466667	10.41916888	0.661104
31	-0.00068634	9.08221720	-0.00623351		31.00000000	1.10774194	10.06075286	0.682698
32	0.00944435	9.10905460	0.08602909		32.00000000	1.07312500	9.77515422	0.704080
33	0.01926387	9.08989910	0.17510659		33.00000000	1.04060606	9.45900409	0.725438
34	0.02943764	9.09309960	0.26767940		34.00000000	1.01000000	9.18403060	0.746814
35	0.03925269	9.09743210	0.35709869		35.00000000	0.98114286	8.92588052	0.768284
36	0.04941977	9.10509590	0.44997173		36.00000000	0.95388889	8.68524981	0.789663
37	0.05920877	9.08945470	0.53817542		37.00000000	0.92810811	8.43599661	0.811015
38	0.06933268	9.09516910	0.63059247		38.00000000	0.90368421	8.21916071	0.832384
39	0.07948785	9.08538440	0.72217763		39.00000000	0.88051282	7.99979744	0.853875
40	0.08935053	9.10318660	0.81337454		40.00000000	0.85850000	7.81508570	0.875256
41	0.09947667	9.10025120	0.90526271		41.00000000	0.83756098	7.62201527	0.896601
42	0.10926047	9.09625050	0.99386060		42.00000000	0.81761905	7.43726767	0.918003
43	0.11946996	9.10185810	1.08739862		43.00000000	0.79860465	7.26878621	0.939470
44	0.12927163	9.08594510	1.17455493		44.00000000	0.78045455	7.09116715	0.960846
45	0.13942753	9.11131570	1.27036824		45.00000000	0.76311111	6.95294625	0.982205
46	0.14929467	9.08292290	1.35603198		46.00000000	0.74652174	6.78059940	1.003584
47	0.15942082	9.08681300	1.44862718		47.00000000	0.73063830	6.63917358	1.025066
48	0.16958120	9.08925630	1.54136699		48.00000000	0.71541667	6.50260544	1.046435
49	0.17934936	9.08715820	1.62977601		49.00000000	0.70081633	6.36842883	1.067780
50	0.18953802	9.09021760	1.72294185		50.00000000	0.68680000	6.24316145	1.089159
51	0.19931512	9.08913420	1.81160187		51.00000000	0.67333333	6.12001703	1.110631
52	0.20944498	9.08748530	1.90332818		52.00000000	0.66038462	6.00123548	1.132012
53	0.21925408	9.10323520	1.99592146		53.00000000	0.64792453	5.89820937	1.153383
54	0.22943977	9.08368870	2.08415945		54.00000000	0.63592593	5.77655315	1.174743
55	0.23921314	9.10393240	2.17778026		55.00000000	0.62436364	5.68416434	1.196217
56	0.24938616	9.08822820	2.26647833		56.00000000	0.61321429	5.57303136	1.217605
57	0.25951231	9.09835340	2.36113471		57.00000000	0.60245614	5.48135887	1.238993
58	0.26931024	9.09735200	2.45001005		58.00000000	0.59206897	5.38625979	1.260334
59	0.27945870	9.09779450	2.54245782		59.00000000	0.58203390	5.29522480	1.281808
60	0.28932065	9.10141940	2.63322858		60.00000000	0.57233333	5.20904570	1.303185
61	0.29946986	9.09616370	2.72402687		61.00000000	0.56295082	5.12069281	1.324604
62	0.30924472	9.08127210	2.80833545		62.00000000	0.55387097	5.02985297	1.346084
63	0.31944084	9.09692000	2.90592777		63.00000000	0.54507937	4.95854338	1.367465
64	0.32922983	9.09440140	2.99414823		64.00000000	0.53656250	4.87971475	1.388827
65	0.33941850	9.09737870	3.08781863		65.00000000	0.52830769	4.80621515	1.410209
66	0.34923130	9.09118560	3.17492657		66.00000000	0.52030303	4.73017142	1.431686
67	0.35937533	9.08793450	3.26597946		67.00000000	0.51253731	4.65790553	1.453077
68	0.36952230	9.08917620	3.35865329		68.00000000	0.50500000	4.59003398	1.474421
69	0.37935448	9.09603690	3.45062235		69.00000000	0.49768116	4.52692619	1.495797
70	0.38944861	9.09230520	3.54098562		70.00000000	0.49057143	4.46042515	1.517291
71	0.39932916	9.09655280	3.63251879		71.00000000	0.48366197	4.39965666	1.538664
72	0.40944859	9.08138080	3.71835856		72.00000000	0.47694444	4.33131412	1.560011
73	0.41930756	9.08618740	3.80990707		73.00000000	0.47041096	4.27424213	1.581389
74	0.42943072	9.09234520	3.90453235		74.00000000	0.46405405	4.21933965	1.602871
75	0.43930680	9.07773110	3.98790900		75.00000000	0.45786667	4.15639048	1.624258
76	0.44945228	9.08667470	4.08402666		76.00000000	0.45184211	4.10574223	1.645608
77	0.45954570	9.07760720	4.17157536		77.00000000	0.44597403	4.04837703	1.666986
78	0.46937564	9.06602380	4.25537072		78.00000000	0.44025641	3.99137509	1.688468
79	0.47955906	9.06799320	4.34863830		79.00000000	0.43468354	3.94170742	1.709853
80	0.48935625	9.06178950	4.43444333		80.00000000	0.42925000	3.88977314	1.731196
81	0.49948761	9.05121710	4.52097080		81.00000000	0.42395062	3.83726908	1.752570
82	0.50935549	9.02673820	4.59781866		82.00000000	0.41878049	3.78022183	1.774040
83	0.51947498	9.01721190	4.68421597		83.00000000	0.41373494	3.73073562	1.795420
84	0.52929151	8.97673420	4.75130920		84.00000000	0.40880952	3.66977443	1.816804
85	0.53938639	8.93190960	4.81775047		85.00000000	0.40400000	3.60849148	1.838171
86	0.54954529	8.86339470	4.87083681		86.00000000	0.39930233	3.53917412	1.859644
87	0.55937672	8.77926920	4.91091881		87.00000000	0.39471264	3.46528856	1.881026
88	0.56944776	8.63415910	4.91670256		88.00000000	0.39022727	3.36928436	1.902409
89	0.57930970	8.45886330	4.90030156		89.00000000	0.38584270	3.26379063	1.923788
90	0.58943290	8.21579360	4.84265905		90.00000000	0.38155556	3.13478169	1.945257
91	0.59919655	7.86057040	4.71002666		91.00000000	0.37736264	2.96628558	1.966627
92	0.60932791	7.40197750	4.51023148		92.00000000	0.37326087	2.76286856	1.988107
93	0.61908269	6.78138920	4.19824067		93.00000000	0.36924731	2.50400973	2.009605
94	0.62926090	5.96184350	3.75155501		94.00000000	0.36531915	2.17797559	2.030981
95	0.63938707	4.87470720	3.11682475		95.00000000	0.36147368	1.76207837	2.052337
96	0.64915377	3.57225010	2.31893962		96.00000000	0.35770833	1.27782363	2.073713
97	0.65926278	1.89533480	1.24952369		97.00000000	0.35402062	0.67098760	2.095184
98	0.66896915	-0.06852671	-0.04584225		98.00000000	0.35040816	-0.02401232	2.116584
99	0.67910570	-2.45874710	-1.66974917		99.00000000	0.34686869	-0.85286238	2.137936
100	0.68882251	-5.19018030	-3.57511302		100.00000000	0.34340000	-1.78230792	2.159355
101	0.69903648	-8.45276550	-5.90879144		101.00000000	0.34000000	-2.87394027	2.180849
06:59 04/04/2018
Test Lot:	JK-PERC
Recipe:	Recipe_YJX-LID
Cell Name:	3-8-8h
Test Order:	3
Test Condition:	Light
1	-0.29989317	9.08937640	-2.72584190		1.00000000	34.34000000	312.12918558	0.000000
2	-0.29002574	9.11078360	-2.64236176		2.00000000	17.17000000	156.43215441	0.021602
3	-0.27992311	9.09065150	-2.54468344		3.00000000	11.44666667	104.05765750	0.043012
4	-0.27013531	9.09728530	-2.45749798		4.00000000	8.58500000	78.10019430	0.064437
5	-0.25997242	9.08278270	-2.36127300		5.00000000	6.86800000	62.38055158	0.085832
6	-0.24981548	9.09914300	-2.27310678		6.00000000	5.72333333	52.07742844	0.107339
7	-0.24004704	9.08738230	-2.18139922		7.00000000	4.90571429	44.58010117	0.128736
8	-0.22984469	9.09248730	-2.08985992		8.00000000	4.29250000	39.02950174	0.150094
9	-0.22006211	9.10246750	-2.00310820		9.00000000	3.81555556	34.73097044	0.171480
10	-0.20988208	9.09804820	-1.90951728		10.00000000	3.43400000	31.24269752	0.192972
11	-0.20003028	9.09617230	-1.81950989		11.00000000	3.12181818	28.39659607	0.214357
12	-0.18991055	9.09145260	-1.72656276		12.00000000	2.86166667	26.01670686	0.235705
13	-0.18012647	9.10186480	-1.63948678		13.00000000	2.64153846	24.04292594	0.257092
14	-0.17001493	9.09162430	-1.54571187		14.00000000	2.45285714	22.30045560	0.278578
15	-0.16022119	9.09644600	-1.45744340		15.00000000	2.28933333	20.82479704	0.299957
16	-0.15002033	9.09073640	-1.36379527		16.00000000	2.14625000	19.51099300	0.321343
17	-0.13989985	9.09754090	-1.27274461		17.00000000	2.02000000	18.37703262	0.342715
18	-0.13009791	9.07868580	-1.18111805		18.00000000	1.90777778	17.32011502	0.364191
19	-0.11995139	9.10323140	-1.09194526		19.00000000	1.80736842	16.45289296	0.385580
20	-0.11007875	9.09444140	-1.00110474		20.00000000	1.71700000	15.61515588	0.406965
21	-0.09993743	9.09783460	-0.90921423		21.00000000	1.63523810	14.87712572	0.428328
22	-0.09016006	9.08769890	-0.81934745		22.00000000	1.56090909	14.18507183	0.449811
23	-0.07998376	9.09550000	-0.72749232		23.00000000	1.49304348	13.57997696	0.471192
24	-0.07015280	9.09234050	-0.63785318		24.00000000	1.43083333	13.00962387	0.492591
25	-0.06000925	9.10366250	-0.54630398		25.00000000	1.37360000	12.50479081	0.514080
26	-0.04985528	9.08843040	-0.45310625		26.00000000	1.32076923	12.00371923	0.535468
27	-0.04005782	9.09306810	-0.36424845		27.00000000	1.27185185	11.56503550	0.556838
28	-0.02991278	9.10958000	-0.27249282		28.00000000	1.22642857	11.17224919	0.578228
29	-0.02007289	9.08415790	-0.18234526		29.00000000	1.18413793	10.75689594	0.599713
30	-0.00993454	9.08635230	-0.09026877		30.00000000	1.14466667	10.40084460	0.621100
31	-0.00066922	9.09766390	-0.00608837		31.00000000	1.10774194	10.07786382	0.642583
32	0.00949570	9.09883880	0.08639986		32.00000000	1.07312500	9.76419139	0.663976
33	0.01931671	9.09059330	0.17560033		33.00000000	1.04060606	9.45972648	0.685469
34	0.02945476	9.09655950	0.26793696		34.00000000	1.01000000	9.18752510	0.706847
35	0.03923781	9.09074690	0.35670095		35.00000000	0.98114286	8.91932139	0.728206
36	0.04942126	9.10461710	0.44996160		36.00000000	0.95388889	8.68479309	0.749589
37	0.05925640	9.08854390	0.53855440		37.00000000	0.92810811	8.43515128	0.771071
38	0.06937511	9.09318350	0.63084056		38.00000000	0.90368421	8.21736635	0.792474
39	0.07954814	9.08326530	0.72255681		39.00000000	0.88051282	7.99793155	0.813831
40	0.08930662	9.09795090	0.81250727		40.00000000	0.85850000	7.81059085	0.835217
41	0.09951984	9.09781070	0.90541267		41.00000000	0.83756098	7.61997121	0.856719
42	0.10931182	9.09179310	0.99384045		42.00000000	0.81761905	7.43362322	0.878096
43	0.11951759	9.09066960	1.08649492		43.00000000	0.79860465	7.25985102	0.899452
44	0.12928724	9.10159110	1.17671959		44.00000000	0.78045455	7.10337814	0.920842
45	0.13944539	9.08860400	1.26736393		45.00000000	0.76311111	6.93561470	0.942327
46	0.14927384	9.10449980	1.35906365		46.00000000	0.74652174	6.79670702	0.963724
47	0.15937839	9.09463210	1.44948782		47.00000000	0.73063830	6.64488652	0.985094
48	0.16957152	9.09828000	1.54280917		48.00000000	0.71541667	6.50906115	1.006465
49	0.17932183	9.09229560	1.63044709		49.00000000	0.70081633	6.37202920	1.027985
50	0.18948592	9.10065840	1.72444663		50.00000000	0.68680000	6.25033219	1.049381
51	0.19931214	9.09326360	1.81239783		51.00000000	0.67333333	6.12279749	1.070775
52	0.20944051	9.09427450	1.90470949		52.00000000	0.66038462	6.00571897	1.092138
53	0.21923101	9.08697320	1.99214631		53.00000000	0.64792453	5.88767282	1.113625
54	0.22942339	9.09440800	2.08646991		54.00000000	0.63592593	5.78336983	1.135011
55	0.23917890	9.10137750	2.17685746		55.00000000	0.62436364	5.68256915	1.156408
56	0.24937277	9.09329700	2.26762066		56.00000000	0.61321429	5.57613962	1.177894
57	0.25947881	9.10004710	2.36126939		57.00000000	0.60245614	5.48237925	1.199273
58	0.26930133	9.10626410	2.45232903		58.00000000	0.59206897	5.39153637	1.220632
59	0.27946690	9.08192350	2.53809701		59.00000000	0.58203390	5.28598734	1.242012
60	0.28929311	9.10405250	2.63373966		60.00000000	0.57233333	5.21055271	1.263504
61	0.29945424	9.08604050	2.72085335		61.00000000	0.56295082	5.11499395	1.284884
62	0.30927673	9.08439830	2.80959300		62.00000000	0.55387097	5.03158448	1.306223
63	0.31939319	9.08538820	2.90181112		63.00000000	0.54507937	4.95225763	1.327610
64	0.32924694	9.09043980	2.99299949		64.00000000	0.53656250	4.87758911	1.349098
65	0.33941999	9.09253600	3.08618848		65.00000000	0.52830769	4.80365671	1.370491
66	0.34927002	9.09980680	3.17828970		66.00000000	0.52030303	4.73465705	1.391865
67	0.35934854	9.09334850	3.26768151		67.00000000	0.51253731	4.66068041	1.413243
68	0.36952752	9.07280640	3.35265165		68.00000000	0.50500000	4.58176723	1.434733
69	0.37934032	9.09308150	3.44937245		69.00000000	0.49768116	4.52545534	1.456130
70	0.38948581	9.08185010	3.53725174		70.00000000	0.49057143	4.45529618	1.477487
71	0.39934403	9.09436990	3.63178233		71.00000000	0.48366197	4.39860088	1.498867
72	0.40949994	9.07607560	3.71665241		72.00000000	0.47694444	4.32878383	1.520376
73	0.41928524	9.09906100	3.81510198		73.00000000	0.47041096	4.28029801	1.541756
74	0.42943817	9.08212850	3.90021264		74.00000000	0.46405405	4.21459855	1.563125
75	0.43929341	9.08151250	3.98944859		75.00000000	0.45786667	4.15812186	1.584507
76	0.44939572	9.08830830	4.08424685		76.00000000	0.45184211	4.10648036	1.605999
77	0.45954645	9.08155250	4.17339521		77.00000000	0.44597403	4.05013653	1.627388
78	0.46939498	9.07030770	4.25755690		78.00000000	0.44025641	3.99326111	1.648766
79	0.47953674	9.06286810	4.34597822		79.00000000	0.43468354	3.93947963	1.670137
80	0.48938084	9.05524920	4.43146546		80.00000000	0.42925000	3.88696572	1.691610
81	0.49946678	9.05894280	4.52464099		81.00000000	0.42395062	3.84054439	1.712987
82	0.50924611	9.03119560	4.59910123		82.00000000	0.41878049	3.78208850	1.734375
83	0.51945782	9.00902940	4.67981077		83.00000000	0.41373494	3.72735024	1.755728
84	0.52921706	8.96547130	4.74468036		84.00000000	0.40880952	3.66517005	1.777210
85	0.53940797	8.93641760	4.82037488		85.00000000	0.40400000	3.61031271	1.798586
86	0.54952294	8.87103840	4.87483910		86.00000000	0.39930233	3.54222626	1.819989
87	0.55933130	8.76766400	4.90402890		87.00000000	0.39471264	3.46070784	1.841482
88	0.56945670	8.66882040	4.93651786		88.00000000	0.39022727	3.38281014	1.862871
89	0.57928813	8.48385140	4.91459441		89.00000000	0.38584270	3.27343210	1.884231
90	0.58941126	8.22163490	4.84592419		90.00000000	0.38155556	3.13701047	1.905612
91	0.59920031	7.90320300	4.73560169		91.00000000	0.37736264	2.98237353	1.927104
92	0.60939044	7.43096880	4.52836135		92.00000000	0.37326087	2.77368988	1.948484
93	0.61907893	6.81935310	4.22171782		93.00000000	0.36924731	2.51802780	1.969838
94	0.62921405	6.00846150	3.78060839		94.00000000	0.36531915	2.19500604	1.991328
95	0.63935435	4.93606760	3.15589629		95.00000000	0.36147368	1.78425854	2.012842
96	0.64915150	3.60897210	2.34276965		96.00000000	0.35770833	1.29095939	2.034226
97	0.65921366	1.91939710	1.26529279		97.00000000	0.35402062	0.67950615	2.055594
98	0.66893566	-0.06523559	-0.04363841		98.00000000	0.35040816	-0.02285908	2.077018
99	0.67903501	-2.53867530	-1.72384941		99.00000000	0.34686869	-0.88058697	2.098510
100	0.68881285	-5.34556150	-3.68209145		100.00000000	0.34340000	-1.83566582	2.119895
101	0.69904023	-8.75628280	-6.12099394		101.00000000	0.34000000	-2.97713615	2.141253
06:59 04/04/2018
Test Lot:	JK-PERC
Recipe:	Recipe_YJX-LID
Cell Name:	3-8-8h
Test Order:	4
Test Condition:	Light
1	-0.29993415	9.10032750	-2.72949899		1.00000000	34.34000000	312.50524635	0.000000
2	-0.29005688	9.09911920	-2.63926213		2.00000000	17.17000000	156.23187666	0.061780
3	-0.27995485	9.09352020	-2.54577508		3.00000000	11.44666667	104.09049456	0.083190
4	-0.27017066	9.09452340	-2.45707339		4.00000000	8.58500000	78.07648339	0.104690
5	-0.26003215	9.10044290	-2.36640773		5.00000000	6.86800000	62.50184184	0.126081
6	-0.24984901	9.10390570	-2.27460183		6.00000000	5.72333333	52.10468696	0.147435
7	-0.24005437	9.09418770	-2.18309950		7.00000000	4.90571429	44.61348652	0.168807
8	-0.22992109	9.09962460	-2.09219561		8.00000000	4.29250000	39.06013860	0.190322
9	-0.22002895	9.08381080	-1.99870135		9.00000000	3.81555556	34.65978476	0.211716
10	-0.20996638	9.09713170	-1.91009181		10.00000000	3.43400000	31.23955026	0.233060
11	-0.20002660	9.09901910	-1.82004585		11.00000000	3.12181818	28.40548326	0.254442
12	-0.18990152	9.10084630	-1.72826455		12.00000000	2.86166667	26.04358850	0.275937
13	-0.18015897	9.09174920	-1.63796017		13.00000000	2.64153846	24.01620519	0.297308
14	-0.17001675	9.09942150	-1.54705407		14.00000000	2.45285714	22.31958102	0.318665
15	-0.16021393	9.08490560	-1.45552843		15.00000000	2.28933333	20.79837722	0.340041
16	-0.15005609	9.08959670	-1.36394934		16.00000000	2.14625000	19.50854692	0.361509
17	-0.13996896	9.09949110	-1.27364631		17.00000000	2.02000000	18.38097202	0.382877
18	-0.13011776	9.09073450	-1.18286601		18.00000000	1.90777778	17.34310126	0.404235
19	-0.11996736	9.09400080	-1.09098327		19.00000000	1.80736842	16.43620987	0.425617
20	-0.11014220	9.09376910	-1.00160773		20.00000000	1.71700000	15.61400154	0.447101
21	-0.09996054	9.10058780	-0.90969970		21.00000000	1.63523810	14.88162786	0.468476
22	-0.09019940	9.08798980	-0.81973119		22.00000000	1.56090909	14.18552590	0.489871
23	-0.08003560	9.10030560	-0.72834839		23.00000000	1.49304348	13.58715193	0.511202
24	-0.07013751	9.09361550	-0.63780353		24.00000000	1.43083333	13.01144818	0.532682
25	-0.06001390	9.08292480	-0.54510175		25.00000000	1.37360000	12.47630551	0.554066
26	-0.04989997	9.10070800	-0.45412508		26.00000000	1.32076923	12.01993510	0.575446
27	-0.04008747	9.07726860	-0.36388476		27.00000000	1.27185185	11.54494088	0.596855
28	-0.02994228	9.09912110	-0.27244845		28.00000000	1.22642857	11.15942209	0.618321
29	-0.02009331	9.09456630	-0.18273996		29.00000000	1.18413793	10.76922092	0.639688
30	-0.00996078	9.08925440	-0.09053602		30.00000000	1.14466667	10.40416654	0.661107
31	-0.00069457	9.09621050	-0.00631797		31.00000000	1.10774194	10.07625382	0.682605
32	0.00942585	9.09812930	0.08575761		32.00000000	1.07312500	9.76343001	0.704100
33	0.01929240	9.09420110	0.17544897		33.00000000	1.04060606	9.46348078	0.725488
34	0.02951991	9.08995910	0.26833481		34.00000000	1.01000000	9.18085869	0.746845
35	0.03921752	9.10820770	0.35720133		35.00000000	0.98114286	8.93645293	0.768216
36	0.04938996	9.09390260	0.44914747		36.00000000	0.95388889	8.67457265	0.789698
37	0.05922376	9.08277130	0.53791587		37.00000000	0.92810811	8.42979369	0.811073
38	0.06934782	9.10710140	0.63155764		38.00000000	0.90368421	8.22994374	0.832447
39	0.07952771	9.08367540	0.72240387		39.00000000	0.88051282	7.99829265	0.853803
40	0.08935704	9.09899710	0.81305946		40.00000000	0.85850000	7.81148901	0.875275
41	0.09946027	9.09209630	0.90430233		41.00000000	0.83756098	7.61518505	0.896680
42	0.10934170	9.10311600	0.99535018		42.00000000	0.81761905	7.44288103	0.918076
43	0.11945534	9.09300800	1.08620836		43.00000000	0.79860465	7.26171848	0.939557
44	0.12931222	9.09356210	1.17590870		44.00000000	0.78045455	7.09711188	0.960958
45	0.13944669	9.08962540	1.26751818		45.00000000	0.76311111	6.93639414	0.982314
46	0.14919417	9.10549930	1.35848741		46.00000000	0.74652174	6.79745317	1.003687
47	0.15933311	9.08443830	1.44745181		47.00000000	0.73063830	6.63743854	1.025175
48	0.16950555	9.09643080	1.54189551		48.00000000	0.71541667	6.50773820	1.046553
49	0.17933191	9.09566500	1.63114298		49.00000000	0.70081633	6.37439053	1.067896
50	0.18945672	9.08506580	1.72122677		50.00000000	0.68680000	6.23962319	1.089276
51	0.19928531	9.08831020	1.81116672		51.00000000	0.67333333	6.11946220	1.110754
52	0.20940343	9.09538940	1.90460574		52.00000000	0.66038462	6.00645523	1.132118
53	0.21925882	9.10529710	1.99641670		53.00000000	0.64792453	5.89954533	1.153482
54	0.22937097	9.08211040	2.08317247		54.00000000	0.63592593	5.77554947	1.174850
55	0.23924942	9.09460640	2.17587931		55.00000000	0.62436364	5.67834152	1.196324
56	0.24931319	9.08985520	2.26622080		56.00000000	0.61321429	5.57402906	1.217707
57	0.25948191	9.09891700	2.36100436		57.00000000	0.60245614	5.48169842	1.239052
58	0.26938716	9.09284110	2.44949464		58.00000000	0.59206897	5.38358902	1.260467
59	0.27953506	9.09401890	2.54209712		59.00000000	0.58203390	5.29302727	1.281991
60	0.28931749	9.09362220	2.63094395		60.00000000	0.57233333	5.20458311	1.303361
61	0.29942742	9.08413790	2.72003997		61.00000000	0.56295082	5.11392288	1.324721
62	0.30925974	9.10166740	2.81477929		62.00000000	0.55387097	5.04114933	1.346093
63	0.31941876	9.09131050	2.90393513		63.00000000	0.54507937	4.95548576	1.367559
64	0.32924661	9.09458640	2.99436174		64.00000000	0.53656250	4.87981402	1.388977
65	0.33938706	9.09332660	3.08615738		65.00000000	0.52830769	4.80407439	1.410343
66	0.34919927	9.07365040	3.16851210		66.00000000	0.52030303	4.72104780	1.431695
67	0.35934120	9.09665300	3.26880221		67.00000000	0.51253731	4.66237409	1.453169
68	0.36944965	9.08815480	3.35761561		68.00000000	0.50500000	4.58951817	1.474539
69	0.37930799	9.08992200	3.44788004		69.00000000	0.49768116	4.52388292	1.495925
70	0.38949680	9.09600160	3.54286352		70.00000000	0.49057143	4.46223850	1.517280
71	0.39933583	9.08658410	3.62859860		71.00000000	0.48366197	4.39483518	1.538759
72	0.40948519	9.08723550	3.72108836		72.00000000	0.47694444	4.33410649	1.560137
73	0.41929221	9.08692840	3.81007829		73.00000000	0.47041096	4.27459070	1.581525
74	0.42936194	9.08531760	3.90088959		74.00000000	0.46405405	4.21607846	1.603005
75	0.43923444	9.08280750	3.98948187		75.00000000	0.45786667	4.15871479	1.624385
76	0.44940984	9.08485030	4.08282112		76.00000000	0.45184211	4.10491789	1.645745
77	0.45953986	9.08148570	4.17330467		77.00000000	0.44597403	4.05010674	1.667116
78	0.46936920	9.06201840	4.25343233		78.00000000	0.44025641	3.98961169	1.688603
79	0.47949326	9.06672000	4.34743113		79.00000000	0.43468354	3.94115398	1.709973
80	0.48931664	9.05546670	4.43099054		80.00000000	0.42925000	3.88705908	1.731310
81	0.49945933	9.05148980	4.52085103		81.00000000	0.42395062	3.83738469	1.752697
82	0.50932735	9.01313210	4.59063469		82.00000000	0.41878049	3.77452386	1.774176
83	0.51941866	9.01222610	4.68111840		83.00000000	0.41373494	3.72867282	1.795553
84	0.52920854	8.99313070	4.75924157		84.00000000	0.40880952	3.67647748	1.816921
85	0.53937209	8.93051910	4.81687275		85.00000000	0.40400000	3.60792972	1.838285
86	0.54952294	8.86967090	4.87408763		86.00000000	0.39930233	3.54168022	1.859797
87	0.55929941	8.77184580	4.90608818		87.00000000	0.39471264	3.46235845	1.881173
88	0.56944060	8.64403340	4.92226357		88.00000000	0.39022727	3.37313758	1.902525
89	0.57924539	8.48070910	4.91241165		89.00000000	0.38584270	3.27221967	1.923904
90	0.58936572	8.23777390	4.85506155		90.00000000	0.38155556	3.14316840	1.945393
91	0.59917349	7.89337830	4.72950302		91.00000000	0.37736264	2.97866605	1.966762
92	0.60927147	7.42038970	4.52103174		92.00000000	0.37326087	2.76974111	1.988229
93	0.61913729	6.83041720	4.22896599		93.00000000	0.36924731	2.52211319	2.009627
94	0.62929779	5.99055960	3.76984592		94.00000000	0.36531915	2.18846613	2.031120
95	0.63933855	4.93547820	3.15544148		95.00000000	0.36147368	1.78404549	2.052512
96	0.64909792	3.59826450	2.33562600		96.00000000	0.35770833	1.28712920	2.073876
97	0.65926218	1.92038710	1.26603859		97.00000000	0.35402062	0.67985663	2.095237
98	0.66891140	-0.09133673	-0.06109618		98.00000000	0.35040816	-0.03200513	2.116712
99	0.67908680	-2.54641030	-1.72923362		99.00000000	0.34686869	-0.88327000	2.138084
100	0.68873680	-5.35645630	-3.68918857		100.00000000	0.34340000	-1.83940709	2.159462
101	0.69902456	-8.75464250	-6.11971012		101.00000000	0.34000000	-2.97657845	2.180827
