# Supplementary material for: Study on the Electrical Injection Regeneration of Industrialized B-Doped Czochralski Silicon PERC Solar Cells
Source: Hindawi journal article supplement (doi:10.1155/2019/5357370), 2019-06-20
Supplement: f1 [file 5357370.f1.zip › section3.3/IVRawData_3-8-9h.csv]

08:00 04/04/2018
Test Lot:	JK-PERC
Recipe:	Recipe_YJX-LID
Cell Name:	3-8-9h
Test Order:	2
Test Condition:	Light
1	-0.29991955	9.07735630	-2.72247662		1.00000000	34.34000000	311.71641534	0.000000
2	-0.29015023	9.08635620	-2.63640834		2.00000000	17.17000000	156.01273595	0.061810
3	-0.27996486	9.08561330	-2.54365246		3.00000000	11.44666667	103.99998691	0.083232
4	-0.27020225	9.08618740	-2.45510828		4.00000000	8.58500000	78.00491883	0.104726
5	-0.26001316	9.07810690	-2.36042726		5.00000000	6.86800000	62.34843819	0.126107
6	-0.24985906	9.08209710	-2.26924424		6.00000000	5.72333333	51.97986907	0.147452
7	-0.24004881	9.09416680	-2.18304392		7.00000000	4.90571429	44.61338399	0.168816
8	-0.22985749	9.08116630	-2.08737409		8.00000000	4.29250000	38.98090634	0.190305
9	-0.22008073	9.07930180	-1.99817937		9.00000000	3.81555556	34.64258042	0.211686
10	-0.20993406	9.08845230	-1.90797569		10.00000000	3.43400000	31.20974520	0.233075
11	-0.20011115	9.07509330	-1.81602736		11.00000000	3.12181818	28.33079127	0.254421
12	-0.18997045	9.09255600	-1.72731695		12.00000000	2.86166667	26.01986442	0.275897
13	-0.18018922	9.08885290	-1.63771331		13.00000000	2.64153846	24.00855451	0.297293
14	-0.17002469	9.07849880	-1.54356894		14.00000000	2.45285714	22.26826063	0.318674
15	-0.16022709	9.09769150	-1.45769663		15.00000000	2.28933333	20.82764841	0.340082
16	-0.15008713	9.08063510	-1.36288646		16.00000000	2.14625000	19.48931308	0.361550
17	-0.13994418	9.08043670	-1.27075427		17.00000000	2.02000000	18.34248213	0.382909
18	-0.13011459	9.07640650	-1.18097291		18.00000000	1.90777778	17.31576662	0.404308
19	-0.11998206	9.08626940	-1.09018932		19.00000000	1.80736842	16.42223638	0.425668
20	-0.11012269	9.08020780	-0.99993691		20.00000000	1.71700000	15.59071679	0.447155
21	-0.10001101	9.08752440	-0.90885249		21.00000000	1.63523810	14.86026609	0.468544
22	-0.09016577	9.08024120	-0.81872696		22.00000000	1.56090909	14.17343104	0.489908
23	-0.08005036	9.08266160	-0.72707037		23.00000000	1.49304348	13.56080867	0.511265
24	-0.07017685	9.08300880	-0.63741692		24.00000000	1.43083333	12.99627176	0.532734
25	-0.06005177	9.07587910	-0.54502260		25.00000000	1.37360000	12.46662753	0.554106
26	-0.04994976	9.07858750	-0.45347328		26.00000000	1.32076923	11.99071903	0.575478
27	-0.04010899	9.08602240	-0.36443122		27.00000000	1.27185185	11.55607442	0.596836
28	-0.02993851	9.08051200	-0.27185703		28.00000000	1.22642857	11.13659936	0.618308
29	-0.02012975	9.08043190	-0.18278682		29.00000000	1.18413793	10.75248384	0.639674
30	-0.00998085	9.08368970	-0.09066297		30.00000000	1.14466667	10.39779681	0.661065
31	-0.00069680	9.08480450	-0.00633030		31.00000000	1.10774194	10.06361892	0.682673
32	0.00952631	9.07654190	0.08646599		32.00000000	1.07312500	9.74026403	0.704056
33	0.01923954	9.08101750	0.17471456		33.00000000	1.04060606	9.44976185	0.725415
34	0.02940452	9.08062360	0.26701133		34.00000000	1.01000000	9.17142984	0.746788
35	0.03925766	9.07867430	0.35640748		35.00000000	0.98114286	8.90747644	0.768268
36	0.04939733	9.08454900	0.44875247		36.00000000	0.95388889	8.66565035	0.789662
37	0.05923484	9.07901950	0.53779429		37.00000000	0.92810811	8.42631161	0.811006
38	0.06934623	9.09815880	0.63092305		38.00000000	0.90368421	8.22186245	0.832384
39	0.07947773	9.06213950	0.72023825		39.00000000	0.88051282	7.97933001	0.853856
40	0.08932044	9.08724590	0.81167684		40.00000000	0.85850000	7.80140061	0.875217
41	0.09945343	9.07266330	0.90230746		41.00000000	0.83756098	7.59890872	0.896572
42	0.10927977	9.08359910	0.99265362		42.00000000	0.81761905	7.42692365	0.917941
43	0.11942019	9.07279490	1.08347489		43.00000000	0.79860465	7.24557621	0.939408
44	0.12926365	9.09162140	1.17521617		44.00000000	0.78045455	7.09559725	0.960793
45	0.13941152	9.07323360	1.26491329		45.00000000	0.76311111	6.92388537	0.982142
46	0.14923042	9.09624960	1.35743715		46.00000000	0.74652174	6.79054807	1.003518
47	0.15936489	9.07281970	1.44588891		47.00000000	0.73063830	6.62894954	1.025007
48	0.16947927	9.07536980	1.53808705		48.00000000	0.71541667	6.49267081	1.046391
49	0.17931752	9.07151130	1.62668091		49.00000000	0.70081633	6.35746323	1.067734
50	0.18947357	9.07910160	1.72024979		50.00000000	0.68680000	6.23552698	1.089115
51	0.19924112	9.08858110	1.81081908		51.00000000	0.67333333	6.11964461	1.110589
52	0.20942247	9.07252310	1.89999020		52.00000000	0.66038462	5.99135468	1.131973
53	0.21919076	9.08306500	1.99092392		53.00000000	0.64792453	5.88514061	1.153332
54	0.22936095	9.08173370	2.08299507		54.00000000	0.63592593	5.77530991	1.174694
55	0.23919773	9.08491800	2.17309176		55.00000000	0.62436364	5.67229244	1.196164
56	0.24932475	9.06708240	2.26064805		56.00000000	0.61321429	5.56006446	1.217556
57	0.25947559	9.08648780	2.35772178		57.00000000	0.60245614	5.47421037	1.238930
58	0.26927587	9.07284830	2.44309912		58.00000000	0.59206897	5.37175191	1.260280
59	0.27945948	9.07758620	2.53681752		59.00000000	0.58203390	5.28346288	1.281757
60	0.28927988	9.08000950	2.62666406		60.00000000	0.57233333	5.19679210	1.303138
61	0.29943517	9.08388140	2.72003357		61.00000000	0.56295082	5.11377848	1.324545
62	0.30927640	9.07870960	2.80783062		62.00000000	0.55387097	5.02843367	1.346020
63	0.31943691	9.07579900	2.89914519		63.00000000	0.54507937	4.94703076	1.367394
64	0.32924467	9.07639980	2.98835626		64.00000000	0.53656250	4.87005577	1.388757
65	0.33938137	9.08804700	3.08431384		65.00000000	0.52830769	4.80128514	1.410137
66	0.34921440	9.07418820	3.16883719		66.00000000	0.52030303	4.72132762	1.431610
67	0.35936821	9.07968900	3.26295158		67.00000000	0.51253731	4.65367941	1.452994
68	0.36954287	9.08594420	3.35764590		68.00000000	0.50500000	4.58840182	1.474339
69	0.37934840	9.06860640	3.44016133		69.00000000	0.49768116	4.51327455	1.495720
70	0.38948286	9.08015820	3.53656598		70.00000000	0.49057143	4.45446618	1.517202
71	0.39929804	9.07386300	3.62317571		71.00000000	0.48366197	4.38868247	1.538569
72	0.40947342	9.07358070	3.71539012		72.00000000	0.47694444	4.32759391	1.559931
73	0.41928416	9.07770350	3.80613729		73.00000000	0.47041096	4.27025121	1.581310
74	0.42941862	9.07484910	3.89690918		74.00000000	0.46405405	4.21122051	1.602788
75	0.43921816	9.07840730	3.98740135		75.00000000	0.45786667	4.15670009	1.624181
76	0.44936976	9.04992100	4.06676083		76.00000000	0.45184211	4.08913536	1.645531
77	0.45954069	9.07608800	4.17083174		77.00000000	0.44597403	4.04769951	1.666900
78	0.46940202	9.05733590	4.25153177		78.00000000	0.44025641	3.98755019	1.688431
79	0.47955361	9.05251980	4.34116855		79.00000000	0.43468354	3.93498139	1.709824
80	0.48932859	9.06034850	4.43348756		80.00000000	0.42925000	3.88915459	1.731177
81	0.49946603	9.02454280	4.50745256		81.00000000	0.42395062	3.82596049	1.752553
82	0.50929314	9.02606770	4.59691436		82.00000000	0.41878049	3.77994103	1.774031
83	0.51942682	8.99387070	4.67165766		83.00000000	0.41373494	3.72107855	1.795429
84	0.52920187	8.96860030	4.74620005		84.00000000	0.40880952	3.66644922	1.816794
85	0.53937578	8.90981580	4.80573885		85.00000000	0.40400000	3.59956558	1.838151
86	0.54950726	8.85716630	4.86707718		86.00000000	0.39930233	3.53668710	1.859637
87	0.55929416	8.75830360	4.89846805		87.00000000	0.39471264	3.45701317	1.881009
88	0.56946063	8.62673760	4.91258743		88.00000000	0.39022727	3.36638829	1.902390
89	0.57927805	8.43629650	4.88696139		89.00000000	0.38584270	3.25508339	1.923741
90	0.58938867	8.18045140	4.82146537		90.00000000	0.38155556	3.12129668	1.945218
91	0.59920013	7.85100650	4.70432412		91.00000000	0.37736264	2.96267652	1.966601
92	0.60928774	7.37168790	4.49147906		92.00000000	0.37326087	2.75156264	1.988085
93	0.61910737	6.75903800	4.18457024		93.00000000	0.36924731	2.49575661	2.009593
94	0.62923068	5.92447760	3.72786307		94.00000000	0.36531915	2.16432511	2.030972
95	0.63935548	4.84669540	3.09876126		95.00000000	0.36147368	1.75195284	2.052385
96	0.64913863	3.54773470	2.30297164		96.00000000	0.35770833	1.26905427	2.073779
97	0.65925598	1.86759470	1.23122297		97.00000000	0.35402062	0.66116703	2.095273
98	0.66895729	-0.06679861	-0.04468542		98.00000000	0.35040816	-0.02340678	2.116654
99	0.67906570	-2.47791720	-1.68266858		99.00000000	0.34686869	-0.85951189	2.137996
100	0.68876255	-5.16264960	-3.55583970		100.00000000	0.34340000	-1.77285387	2.159379
101	0.69905633	-8.42040730	-5.88633902		101.00000000	0.34000000	-2.86293848	2.180862
08:00 04/04/2018
Test Lot:	JK-PERC
Recipe:	Recipe_YJX-LID
Cell Name:	3-8-9h
Test Order:	3
Test Condition:	Light
1	-0.30001110	9.08379270	-2.72523864		1.00000000	34.34000000	311.93744132	0.000000
2	-0.29013237	9.08504100	-2.63586448		2.00000000	17.17000000	155.99015397	0.021585
3	-0.27998647	9.08204750	-2.54285042		3.00000000	11.44666667	103.95917038	0.042986
4	-0.27021864	9.08602910	-2.45521443		4.00000000	8.58500000	78.00355982	0.064368
5	-0.26006004	9.08751110	-2.36329850		5.00000000	6.86800000	62.41302623	0.085728
6	-0.24990818	9.06994440	-2.26665330		6.00000000	5.72333333	51.91031512	0.107222
7	-0.24008825	9.09205910	-2.18289656		7.00000000	4.90571429	44.60304421	0.128603
8	-0.22991182	9.07609940	-2.08670253		8.00000000	4.29250000	38.95915667	0.150032
9	-0.22009933	9.07232090	-1.99681175		9.00000000	3.81555556	34.61594441	0.171437
10	-0.20996234	9.08727740	-1.90798603		10.00000000	3.43400000	31.20571059	0.192894
11	-0.20013572	9.08446690	-1.81812632		11.00000000	3.12181818	28.36005394	0.214254
12	-0.18998235	9.06604770	-1.72238905		12.00000000	2.86166667	25.94400650	0.235626
13	-0.18022123	9.09751800	-1.63956588		13.00000000	2.64153846	24.03144370	0.257113
14	-0.17004181	9.07291980	-1.54277570		14.00000000	2.45285714	22.25457614	0.278490
15	-0.16022858	9.08023830	-1.45491369		15.00000000	2.28933333	20.78769221	0.299843
16	-0.15006629	9.08697700	-1.36364893		16.00000000	2.14625000	19.50292439	0.321220
17	-0.13992931	9.07603930	-1.27000392		17.00000000	2.02000000	18.33359939	0.342692
18	-0.13007365	9.07625480	-1.18058159		18.00000000	1.90777778	17.31547721	0.364069
19	-0.11994931	9.08431340	-1.08965712		19.00000000	1.80736842	16.41870117	0.385437
20	-0.11013534	9.08021640	-1.00005272		20.00000000	1.71700000	15.59073156	0.406814
21	-0.10000058	9.07604120	-0.90760938		21.00000000	1.63523810	14.84148832	0.428287
22	-0.09015535	9.07531640	-0.81818831		22.00000000	1.56090909	14.16574387	0.449660
23	-0.08002059	9.09104060	-0.72747045		23.00000000	1.49304348	13.57331888	0.470997
24	-0.07018280	9.08480450	-0.63759702		24.00000000	1.43083333	12.99884111	0.492367
25	-0.06003614	9.07337760	-0.54473058		25.00000000	1.37360000	12.46319147	0.513853
26	-0.04993264	9.08978940	-0.45387722		26.00000000	1.32076923	12.00551415	0.535228
27	-0.04009039	9.06870270	-0.36356779		27.00000000	1.27185185	11.53404632	0.556583
28	-0.02989386	9.09181880	-0.27178954		28.00000000	1.22642857	11.15046634	0.577950
29	-0.02013794	9.06529140	-0.18255626		29.00000000	1.18413793	10.73455540	0.599430
30	-0.00995704	9.08614060	-0.09047103		30.00000000	1.14466667	10.40060227	0.620815
31	-0.00071615	9.08691220	-0.00650761		31.00000000	1.10774194	10.06595371	0.642286
32	0.00946008	9.07357790	0.08583673		32.00000000	1.07312500	9.73708328	0.663657
33	0.01925591	9.08484080	0.17493686		33.00000000	1.04060606	9.45374040	0.685147
34	0.02934870	9.07765010	0.26641721		34.00000000	1.01000000	9.16842660	0.706526
35	0.03923235	9.08549310	0.35644525		35.00000000	0.98114286	8.91416666	0.727919
36	0.04935491	9.07720950	0.44800487		36.00000000	0.95388889	8.65864928	0.749266
37	0.05923856	9.07922170	0.53784006		37.00000000	0.92810811	8.42649928	0.770731
38	0.06934028	9.07900620	0.62954084		38.00000000	0.90368421	8.20455455	0.792131
39	0.07947847	9.08779340	0.72228393		39.00000000	0.88051282	8.00191860	0.813510
40	0.08931301	9.07646470	0.81064636		40.00000000	0.85850000	7.79214494	0.834895
41	0.09941770	9.08041670	0.90275415		41.00000000	0.83756098	7.60540267	0.856363
42	0.10926563	9.08561710	0.99274568		42.00000000	0.81761905	7.42857360	0.877729
43	0.11940605	9.06202600	1.08206073		43.00000000	0.79860465	7.23697611	0.899108
44	0.12923612	9.08614730	1.17425842		44.00000000	0.78045455	7.09132496	0.920600
45	0.13941003	9.07083030	1.26456472		45.00000000	0.76311111	6.92205139	0.941972
46	0.14919843	9.08128930	1.35491411		46.00000000	0.74652174	6.77937988	0.963312
47	0.15937158	9.08759310	1.44830407		47.00000000	0.73063830	6.63974355	0.984696
48	0.16948968	9.07962890	1.53890340		48.00000000	0.71541667	6.49571784	1.006174
49	0.17931826	9.07740310	1.62774413		49.00000000	0.70081633	6.36159229	1.027549
50	0.18947282	9.07795140	1.72002505		50.00000000	0.68680000	6.23473702	1.048907
51	0.19926865	9.07747460	1.80885611		51.00000000	0.67333333	6.11216623	1.070275
52	0.20939419	9.08239080	1.90179986		52.00000000	0.66038462	5.99787116	1.091744
53	0.21925105	9.08034800	1.99087583		53.00000000	0.64792453	5.88338019	1.113118
54	0.22938329	9.08561710	2.08408874		54.00000000	0.63592593	5.77777947	1.134463
55	0.23921335	9.07861900	2.17172686		55.00000000	0.62436364	5.66835957	1.155834
56	0.24934857	9.07983400	2.26404362		56.00000000	0.61321429	5.56788392	1.177315
57	0.25952172	9.07414150	2.35493681		57.00000000	0.60245614	5.46677227	1.198683
58	0.26933989	9.07639980	2.44463652		58.00000000	0.59206897	5.37385464	1.220036
59	0.27947360	9.07516960	2.53627032		59.00000000	0.58203390	5.28205634	1.241398
60	0.28928137	9.07145120	2.62420183		60.00000000	0.57233333	5.19189390	1.262863
61	0.29940987	9.06044670	2.71278717		61.00000000	0.56295082	5.10058590	1.284258
62	0.30921835	9.09208390	2.81143918		62.00000000	0.55387097	5.03584131	1.305613
63	0.31937885	9.05925560	2.89333464		63.00000000	0.54507937	4.93801329	1.327040
64	0.32925135	9.10605910	2.99818225		64.00000000	0.53656250	4.88596984	1.348516
65	0.33938062	9.07052520	3.07836047		65.00000000	0.52830769	4.79202824	1.369886
66	0.34918314	9.07724090	3.16961948		66.00000000	0.52030303	4.72291595	1.391303
67	0.35930124	9.06396680	3.25669451		67.00000000	0.51253731	4.64562119	1.412669
68	0.36950493	9.08055690	3.35531054		68.00000000	0.50500000	4.58568123	1.434145
69	0.37933946	9.06834220	3.43998003		69.00000000	0.49768116	4.51314306	1.455540
70	0.38946795	9.06953050	3.53229145		70.00000000	0.49057143	4.44925253	1.476927
71	0.39927942	9.07337570	3.62281219		71.00000000	0.48366197	4.38844678	1.498261
72	0.40943474	9.07662200	3.71628437		72.00000000	0.47694444	4.32904444	1.519739
73	0.41927522	9.07052710	3.80304725		73.00000000	0.47041096	4.26687535	1.541142
74	0.42938066	9.06390290	3.89186461		74.00000000	0.46405405	4.20614089	1.562519
75	0.43923232	9.06557370	3.98189297		75.00000000	0.45786667	4.15082401	1.584002
76	0.44935560	9.06003000	4.07117522		76.00000000	0.45184211	4.09370303	1.605373
77	0.45952728	9.06362440	4.16498267		77.00000000	0.44597403	4.04214106	1.626723
78	0.46941245	9.04438880	4.24554871		78.00000000	0.44025641	3.98185015	1.648108
79	0.47950745	9.06090070	4.34476939		79.00000000	0.43468354	3.93862443	1.669579
80	0.48933008	9.03141880	4.41934488		80.00000000	0.42925000	3.87673652	1.690972
81	0.49948168	9.03309730	4.51186662		81.00000000	0.42395062	3.82958718	1.712309
82	0.50930279	9.00761700	4.58760447		82.00000000	0.41878049	3.77221424	1.733679
83	0.51943874	8.99725340	4.67352197		83.00000000	0.41373494	3.72247809	1.755177
84	0.52921450	8.96234040	4.74300049		84.00000000	0.40880952	3.66389011	1.776550
85	0.53938842	8.91357420	4.80787870		85.00000000	0.40400000	3.60108398	1.797894
86	0.54950500	8.84292890	4.85923365		86.00000000	0.39930233	3.53100207	1.819280
87	0.55931199	8.76399900	4.90180972		87.00000000	0.39471264	3.45926121	1.840751
88	0.56948072	8.62448600	4.91147850		88.00000000	0.39022727	3.36550965	1.862123
89	0.57924008	8.45811560	4.89927956		89.00000000	0.38584270	3.26350213	1.883489
90	0.58937603	8.19785590	4.83161976		90.00000000	0.38155556	3.12793746	1.904863
91	0.59918600	7.86379810	4.71187773		91.00000000	0.37736264	2.96750359	1.926387
92	0.60930783	7.39950660	4.50857731		92.00000000	0.37326087	2.76194627	1.947761
93	0.61913788	6.79130510	4.20475424		93.00000000	0.36924731	2.50767115	1.969099
94	0.62922323	5.97111180	3.75716225		94.00000000	0.36531915	2.18136148	1.990573
95	0.63935620	4.88883210	3.12570511		95.00000000	0.36147368	1.76718415	2.012087
96	0.64910811	3.57834430	2.32273231		96.00000000	0.35770833	1.28000358	2.033467
97	0.65926939	1.87736390	1.23768855		97.00000000	0.35402062	0.66462553	2.054837
98	0.66893274	-0.09667277	-0.06466758		98.00000000	0.35040816	-0.03387493	2.076237
99	0.67899728	-2.54353810	-1.72705545		99.00000000	0.34686869	-0.88227372	2.097717
100	0.68875140	-5.32588620	-3.66821158		100.00000000	0.34340000	-1.82890932	2.119117
101	0.69902730	-8.69567010	-6.07851079		101.00000000	0.34000000	-2.95652783	2.140549
08:00 04/04/2018
Test Lot:	JK-PERC
Recipe:	Recipe_YJX-LID
Cell Name:	3-8-9h
Test Order:	4
Test Condition:	Light
1	-0.29995245	9.07835290	-2.72307419		1.00000000	34.34000000	311.75063859	0.000000
2	-0.29013550	9.07410620	-2.63272034		2.00000000	17.17000000	155.80240345	0.061809
3	-0.27999702	9.07363510	-2.54059079		3.00000000	11.44666667	103.86287644	0.083245
4	-0.27018306	9.07037450	-2.45066154		4.00000000	8.58500000	77.86916508	0.104752
5	-0.26000288	9.08550450	-2.36225734		5.00000000	6.86800000	62.39924491	0.126129
6	-0.24983165	9.06151390	-2.26385297		6.00000000	5.72333333	51.86206455	0.147485
7	-0.24002065	9.08861350	-2.18145492		7.00000000	4.90571429	44.58614108	0.168906
8	-0.22989631	9.08362870	-2.08829272		8.00000000	4.29250000	38.99147619	0.190402
9	-0.22004661	9.06208800	-1.99408174		9.00000000	3.81555556	34.57690021	0.211782
10	-0.20989473	9.08898540	-1.90773014		10.00000000	3.43400000	31.21157586	0.233125
11	-0.20008224	9.07097530	-1.81494106		11.00000000	3.12181818	28.31793562	0.254503
12	-0.18994376	9.08061310	-1.72480580		12.00000000	2.86166667	25.98568782	0.275985
13	-0.18014465	9.07109360	-1.63410898		13.00000000	2.64153846	23.96164263	0.297359
14	-0.16998906	9.08719640	-1.54472397		14.00000000	2.45285714	22.28959460	0.318749
15	-0.16014829	9.07382580	-1.45315769		15.00000000	2.28933333	20.77301186	0.340091
16	-0.15005074	9.07951160	-1.36238743		16.00000000	2.14625000	19.48690177	0.361564
17	-0.13988398	9.08807950	-1.27127673		17.00000000	2.02000000	18.35792059	0.382946
18	-0.13010572	9.06919290	-1.17995387		18.00000000	1.90777778	17.30200468	0.404337
19	-0.11995831	9.07989880	-1.08920932		19.00000000	1.80736842	16.41072236	0.425802
20	-0.11011158	9.07677940	-0.99945852		20.00000000	1.71700000	15.58483023	0.447276
21	-0.09995747	9.08015730	-0.90762951		21.00000000	1.63523810	14.84821913	0.468644
22	-0.09015837	9.07615380	-0.81829126		22.00000000	1.56090909	14.16705098	0.490043
23	-0.08001170	9.08162880	-0.72663659		23.00000000	1.49304348	13.55926665	0.511395
24	-0.07016647	9.07659240	-0.63687244		24.00000000	1.43083333	12.98709096	0.532876
25	-0.06003692	9.07915590	-0.54508452		25.00000000	1.37360000	12.47112854	0.554274
26	-0.04985452	9.07906910	-0.45263264		26.00000000	1.32076923	11.99135511	0.575637
27	-0.04008073	9.08557420	-0.36415648		27.00000000	1.27185185	11.55550437	0.596998
28	-0.02989909	9.08032890	-0.27149353		28.00000000	1.22642857	11.13637480	0.618482
29	-0.02006724	9.06940650	-0.18199798		29.00000000	1.18413793	10.73942825	0.639849
30	-0.00993471	9.08367820	-0.09024375		30.00000000	1.14466667	10.39778365	0.661232
31	-0.00069085	9.07438280	-0.00626902		31.00000000	1.10774194	10.05207437	0.682701
32	0.00946901	9.09317970	0.08610342		32.00000000	1.07312500	9.75811847	0.704173
33	0.01932662	9.05516910	0.17500583		33.00000000	1.04060606	9.42286385	0.725550
34	0.02946184	9.08834170	0.26775923		34.00000000	1.01000000	9.17922512	0.746934
35	0.03923237	9.07783410	0.35614495		35.00000000	0.98114286	8.90665209	0.768411
36	0.04939215	9.06690790	0.44783403		36.00000000	0.95388889	8.64882270	0.789802
37	0.05925050	9.08775900	0.53845426		37.00000000	0.92810811	8.43442281	0.811156
38	0.06941251	9.07217690	0.62972254		38.00000000	0.90368421	8.19838302	0.832528
39	0.07956187	9.08677100	0.72296047		39.00000000	0.88051282	8.00101836	0.854000
40	0.08938078	9.07516190	0.81114503		40.00000000	0.85850000	7.79102649	0.875378
41	0.09952343	9.07413770	0.90308934		41.00000000	0.83756098	7.60014362	0.896717
42	0.10931630	9.06926630	0.99141864		42.00000000	0.81761905	7.41520487	0.918104
43	0.11948798	9.08634190	1.08570864		43.00000000	0.79860465	7.25639490	0.939596
44	0.12928903	9.07003020	1.17265541		44.00000000	0.78045455	7.07874630	0.960972
45	0.13943912	9.07888890	1.26595228		45.00000000	0.76311111	6.92820100	0.982340
46	0.14930046	9.07011700	1.35417264		46.00000000	0.74652174	6.77103952	1.003718
47	0.15939847	9.07353210	1.44630713		47.00000000	0.73063830	6.62947005	1.025190
48	0.16957387	9.08272080	1.54019212		48.00000000	0.71541667	6.49792984	1.046575
49	0.17934813	9.06699470	1.62614854		49.00000000	0.70081633	6.35429792	1.067933
50	0.18951683	9.07554440	1.71996841		50.00000000	0.68680000	6.23308389	1.089315
51	0.19926727	9.08225150	1.80979546		51.00000000	0.67333333	6.11538268	1.110802
52	0.20945682	9.07360550	1.90052855		52.00000000	0.66038462	5.99206948	1.132167
53	0.21926084	9.07495880	1.98978309		53.00000000	0.64792453	5.87988840	1.153530
54	0.22940871	9.07822130	2.08262304		54.00000000	0.63592593	5.77307629	1.174906
55	0.23921274	9.07975010	2.17199190		55.00000000	0.62436364	5.66906579	1.196392
56	0.24939260	9.07716660	2.26377818		56.00000000	0.61321429	5.56624823	1.217792
57	0.25950029	9.06853200	2.35328668		57.00000000	0.60245614	5.46339279	1.239157
58	0.26934153	9.07630540	2.44462598		58.00000000	0.59206897	5.37379875	1.260517
59	0.27951023	9.07281780	2.53594539		59.00000000	0.58203390	5.28068751	1.281997
60	0.28930086	9.07822130	2.62633723		60.00000000	0.57233333	5.19576866	1.303374
61	0.29947776	9.07638360	2.71817503		61.00000000	0.56295082	5.10955759	1.324758
62	0.30927506	9.07929610	2.80799985		62.00000000	0.55387097	5.02875852	1.346113
63	0.31943038	9.07428260	2.89860154		63.00000000	0.54507937	4.94620420	1.367595
64	0.32926047	9.07535270	2.98815490		64.00000000	0.53656250	4.86949393	1.388972
65	0.33942321	9.07197950	3.07924040		65.00000000	0.52830769	4.79279655	1.410350
66	0.34924734	9.08033750	3.17128372		66.00000000	0.52030303	4.72452712	1.431832
67	0.35940933	9.07814310	3.26276933		67.00000000	0.51253731	4.65288708	1.453226
68	0.36952147	9.07588290	3.35373359		68.00000000	0.50500000	4.58332086	1.474578
69	0.37939844	9.07379530	3.44258378		69.00000000	0.49768116	4.51585697	1.495951
70	0.38954854	9.06549930	3.53145202		70.00000000	0.49057143	4.44727494	1.517437
71	0.39931014	9.07379910	3.62325999		71.00000000	0.48366197	4.38865156	1.538814
72	0.40947884	9.07288070	3.71515266		72.00000000	0.47694444	4.32726004	1.560163
73	0.41930744	9.06084160	3.79927830		73.00000000	0.47041096	4.26231919	1.581549
74	0.42942703	9.07106880	3.89536213		74.00000000	0.46405405	4.20946625	1.603038
75	0.43928093	9.05588340	3.97807688		75.00000000	0.45786667	4.14638715	1.624406
76	0.44943026	9.06894210	4.07585701		76.00000000	0.45184211	4.09772989	1.645761
77	0.45956326	9.05578330	4.16170530		77.00000000	0.44597403	4.03864414	1.667133
78	0.46942309	9.05204300	4.24923800		78.00000000	0.44025641	3.98521996	1.688611
79	0.47955906	9.06275750	4.34612747		79.00000000	0.43468354	3.93943155	1.709991
80	0.48939136	9.02664280	4.41756100		80.00000000	0.42925000	3.87468642	1.731332
81	0.49951169	9.03821180	4.51469245		81.00000000	0.42395062	3.83175547	1.752714
82	0.50930309	8.98949050	4.57837529		82.00000000	0.41878049	3.76462322	1.774204
83	0.51945537	9.01172160	4.68118718		83.00000000	0.41373494	3.72846409	1.795585
84	0.52926165	8.95944880	4.74189265		84.00000000	0.40880952	3.66270800	1.816955
85	0.53938049	8.90874390	4.80520265		85.00000000	0.40400000	3.59913254	1.838333
86	0.54953653	8.83640480	4.85592723		86.00000000	0.39930233	3.52839699	1.859803
87	0.55933911	8.74764540	4.89290019		87.00000000	0.39471264	3.45280624	1.881193
88	0.56949216	8.63669490	4.91853003		88.00000000	0.39022727	3.37027390	1.902562
89	0.57927090	8.44025520	4.88919423		89.00000000	0.38584270	3.25661083	1.923930
90	0.58942991	8.20133210	4.83411044		90.00000000	0.38155556	3.12926383	1.945413
91	0.59921461	7.85506110	4.70686737		91.00000000	0.37736264	2.96420657	1.966791
92	0.60933346	7.38356780	4.49905491		92.00000000	0.37326087	2.75599694	1.988280
93	0.61911660	6.76785760	4.19009299		93.00000000	0.36924731	2.49901323	2.009645
94	0.62924141	5.94049310	3.73800425		94.00000000	0.36531915	2.17017588	2.031172
95	0.63936996	4.85669900	3.10522745		95.00000000	0.36147368	1.75556888	2.052565
96	0.64916503	3.55531170	2.30798403		96.00000000	0.35770833	1.27176462	2.073955
97	0.65930098	1.86726980	1.23109281		97.00000000	0.35402062	0.66105201	2.095445
98	0.66898739	-0.09572491	-0.06403876		98.00000000	0.35040816	-0.03354279	2.116843
99	0.67911965	-2.52533150	-1.71500224		99.00000000	0.34686869	-0.87595842	2.138188
100	0.68881649	-5.27273040	-3.63194365		100.00000000	0.34340000	-1.81065562	2.159568
101	0.69903213	-8.59331130	-6.00700070		101.00000000	0.34000000	-2.92172584	2.181044
