# Supplementary material for: Study on the Electrical Injection Regeneration of Industrialized B-Doped Czochralski Silicon PERC Solar Cells
Source: Hindawi journal article supplement (doi:10.1155/2019/5357370), 2019-06-20
Supplement: f1 [file 5357370.f1.zip › section3.3/IVRawData_3-8-10h.csv]

09:01 04/04/2018
Test Lot:	JK-PERC
Recipe:	Recipe_YJX-LID
Cell Name:	3-8-10h
Test Order:	2
Test Condition:	Light
1	-0.29997754	9.05420880	-2.71605928		1.00000000	34.34000000	310.92153019	0.000000
2	-0.29015273	9.07005500	-2.63170122		2.00000000	17.17000000	155.73284435	0.061797
3	-0.28005630	9.05528160	-2.53598866		3.00000000	11.44666667	103.65279005	0.083212
4	-0.27020171	9.07094480	-2.45098480		4.00000000	8.58500000	77.87406111	0.104704
5	-0.26005688	9.06235790	-2.35672852		5.00000000	6.86800000	62.24027406	0.126088
6	-0.24989867	9.07090950	-2.26680822		6.00000000	5.72333333	51.91583871	0.147468
7	-0.24006867	9.07211300	-2.17793010		7.00000000	4.90571429	44.50519435	0.168803
8	-0.22993873	9.06484320	-2.08435853		8.00000000	4.29250000	38.91083944	0.190269
9	-0.22009905	9.06682780	-1.99560019		9.00000000	3.81555556	34.59498518	0.211633
10	-0.20993488	9.06468490	-1.90299354		10.00000000	3.43400000	31.12812795	0.233026
11	-0.20008552	9.06277560	-1.81333017		11.00000000	3.12181818	28.29233765	0.254504
12	-0.18995632	9.06698420	-1.72233095		12.00000000	2.86166667	25.94668645	0.275877
13	-0.18016502	9.06607820	-1.63339016		13.00000000	2.64153846	23.94839426	0.297216
14	-0.17000829	9.07942960	-1.54357830		14.00000000	2.45285714	22.27054375	0.318593
15	-0.16019763	9.06347470	-1.45194717		15.00000000	2.28933333	20.74931475	0.340073
16	-0.15007737	9.06182580	-1.35997498		16.00000000	2.14625000	19.44894362	0.361449
17	-0.13989459	9.07747550	-1.26988971		17.00000000	2.02000000	18.33650051	0.382794
18	-0.13008617	9.06233310	-1.17888420		18.00000000	1.90777778	17.28891770	0.404170
19	-0.11995772	9.06790070	-1.08776469		19.00000000	1.80736842	16.38903737	0.425631
20	-0.11015748	9.07253170	-0.99940723		20.00000000	1.71700000	15.57753693	0.447008
21	-0.09998363	9.07253840	-0.90710535		21.00000000	1.63523810	14.83576041	0.468340
22	-0.09015363	9.06507210	-0.81724913		22.00000000	1.56090909	14.14975345	0.489725
23	-0.08001328	9.06359480	-0.72520790		23.00000000	1.49304348	13.53234111	0.511196
24	-0.07018922	9.07188610	-0.63674864		24.00000000	1.43083333	12.98035703	0.532569
25	-0.06003695	9.05332570	-0.54353410		25.00000000	1.37360000	12.43564818	0.553923
26	-0.04991595	9.07103160	-0.45278913		26.00000000	1.32076923	11.98073943	0.575286
27	-0.04008297	9.07914070	-0.36391888		27.00000000	1.27185185	11.54732191	0.596757
28	-0.02993740	9.06784920	-0.27146781		28.00000000	1.22642857	11.12106934	0.618153
29	-0.02011483	9.06937120	-0.18242889		29.00000000	1.18413793	10.73938645	0.639499
30	-0.00998341	9.06735320	-0.09052307		30.00000000	1.14466667	10.37909696	0.660871
31	-0.00069819	9.07063770	-0.00633301		31.00000000	1.10774194	10.04792576	0.682464
32	0.00943378	9.06934740	0.08555819		32.00000000	1.07312500	9.73254343	0.703845
33	0.01926499	9.06496140	0.17463639		33.00000000	1.04060606	9.43305377	0.725227
34	0.02939539	9.07442090	0.26674610		34.00000000	1.01000000	9.16516511	0.746597
35	0.03923479	9.06007190	0.35546999		35.00000000	0.98114286	8.88922483	0.768071
36	0.04940909	9.06193070	0.44774173		36.00000000	0.95388889	8.64407501	0.789451
37	0.05921500	9.06149010	0.53657612		37.00000000	0.92810811	8.41004243	0.810839
38	0.06933349	9.07418730	0.62914504		38.00000000	0.90368421	8.20019979	0.832185
39	0.07949216	9.06007480	0.72020491		39.00000000	0.88051282	7.97751202	0.853660
40	0.08932486	9.07731340	0.81082977		40.00000000	0.85850000	7.79287355	0.875033
41	0.09950363	9.06182380	0.90168435		41.00000000	0.83756098	7.58982998	0.896407
42	0.10931103	9.06635380	0.99105247		42.00000000	0.81761905	7.41282356	0.917889
43	0.11946375	9.07094670	1.08364931		43.00000000	0.79860465	7.24410023	0.939267
44	0.12928157	9.06010340	1.17130439		44.00000000	0.78045455	7.07099888	0.960612
45	0.13943057	9.06028180	1.26328026		45.00000000	0.76311111	6.91400171	0.981993
46	0.14921638	9.05591960	1.35129154		46.00000000	0.74652174	6.76044085	1.003480
47	0.15939887	9.06317420	1.44465973		47.00000000	0.73063830	6.62190217	1.024865
48	0.16955383	9.07264520	1.53830174		48.00000000	0.71541667	6.49072159	1.046212
49	0.17937313	9.06141000	1.62537347		49.00000000	0.70081633	6.35038407	1.067574
50	0.18950948	9.06233980	1.71739930		50.00000000	0.68680000	6.22401497	1.089046
51	0.19927521	9.07778740	1.80897799		51.00000000	0.67333333	6.11237685	1.110428
52	0.20944355	9.07516380	1.90073452		52.00000000	0.66038462	5.99309856	1.131772
53	0.21925914	9.05952930	1.98638460		53.00000000	0.64792453	5.86989125	1.153151
54	0.22940740	9.05373670	2.07699420		54.00000000	0.63592593	5.75750589	1.174626
55	0.23920587	9.07625390	2.17109321		55.00000000	0.62436364	5.66688289	1.196003
56	0.24939653	9.05214600	2.25757380		56.00000000	0.61321429	5.55090524	1.217359
57	0.25955001	9.07118030	2.35442494		57.00000000	0.60245614	5.46498827	1.238742
58	0.26936558	9.06649680	2.44220217		58.00000000	0.59206897	5.36799138	1.260222
59	0.27947590	9.06986810	2.53480955		59.00000000	0.58203390	5.27897069	1.281613
60	0.28931677	9.05895710	2.62090821		60.00000000	0.57233333	5.18474311	1.302960
61	0.29942188	9.06308560	2.71368613		61.00000000	0.56295082	5.10207147	1.324372
62	0.30929402	9.05915070	2.80194114		62.00000000	0.55387097	5.01760057	1.345853
63	0.31944153	9.06363960	2.89530290		63.00000000	0.54507937	4.94040292	1.367241
64	0.32922438	9.06649680	2.98491179		64.00000000	0.53656250	4.86474219	1.388623
65	0.33938602	9.06203460	3.07552786		65.00000000	0.52830769	4.78754259	1.409985
66	0.34921128	9.06736660	3.16642670		66.00000000	0.52030303	4.71777832	1.431452
67	0.35936698	9.06921390	3.25917601		67.00000000	0.51253731	4.64831053	1.452825
68	0.36951599	9.05116460	3.34455005		68.00000000	0.50500000	4.57083812	1.474201
69	0.37935686	9.08300300	3.44569950		69.00000000	0.49768116	4.52043946	1.495548
70	0.38946864	9.05267140	3.52573162		70.00000000	0.49057143	4.44098194	1.517013
71	0.39930806	9.06687070	3.62047455		71.00000000	0.48366197	4.38530056	1.538394
72	0.40942356	9.05912880	3.70902076		72.00000000	0.47694444	4.32070115	1.559766
73	0.41926742	9.05519200	3.79654699		73.00000000	0.47041096	4.25966155	1.581255
74	0.42941940	9.06555560	3.89292545		74.00000000	0.46405405	4.20690783	1.602633
75	0.43923649	9.05570890	3.97759779		75.00000000	0.45786667	4.14630725	1.623980
76	0.44940558	9.05352310	4.06870380		76.00000000	0.45184211	4.09076294	1.645357
77	0.45953074	9.04051210	4.15439322		77.00000000	0.44597403	4.03183358	1.666833
78	0.46941778	9.06038860	4.25310750		78.00000000	0.44025641	3.98889416	1.688222
79	0.47953627	9.03566840	4.33293072		79.00000000	0.43468354	3.92765637	1.709563
80	0.48935410	9.03011610	4.41892434		80.00000000	0.42925000	3.87617734	1.730942
81	0.49948001	9.01327710	4.50195174		81.00000000	0.42395062	3.82118439	1.752427
82	0.50932091	9.00782110	4.58787164		82.00000000	0.41878049	3.77229971	1.773789
83	0.51943272	8.97405720	4.66141894		83.00000000	0.41373494	3.71288102	1.795136
84	0.52923936	8.94836520	4.73582707		84.00000000	0.40880952	3.65817692	1.816512
85	0.53937423	8.89244940	4.79635805		85.00000000	0.40400000	3.59254956	1.838000
86	0.54950756	8.84480000	4.86028447		86.00000000	0.39930233	3.53174921	1.859382
87	0.55933583	8.73472400	4.88564410		87.00000000	0.39471264	3.44770600	1.880733
88	0.56947362	8.61571980	4.90642514		88.00000000	0.39022727	3.36208884	1.902113
89	0.57926691	8.41954900	4.87716613		89.00000000	0.38584270	3.24862149	1.923632
90	0.58940995	8.18156240	4.82229429		90.00000000	0.38155556	3.12172059	1.945014
91	0.59918910	7.81750110	4.68416145		91.00000000	0.37736264	2.95003283	1.966355
92	0.60930830	7.35699610	4.48267879		92.00000000	0.37326087	2.74607876	1.987855
93	0.61912018	6.74417300	4.17545360		93.00000000	0.36924731	2.49026775	2.009360
94	0.62921113	5.90842530	3.71764696		94.00000000	0.36531915	2.15846090	2.030748
95	0.63934153	4.83344220	3.09022033		95.00000000	0.36147368	1.74716216	2.052121
96	0.64911842	3.52859310	2.29047478		96.00000000	0.35770833	1.26220716	2.073483
97	0.65920711	1.85063340	1.21995070		97.00000000	0.35402062	0.65516238	2.094967
98	0.66897207	-0.09795491	-0.06552910		98.00000000	0.35040816	-0.03432420	2.116356
99	0.67903847	-2.48164560	-1.68513283		99.00000000	0.34686869	-0.86080515	2.137738
100	0.68879157	-5.19804620	-3.58037040		100.00000000	0.34340000	-1.78500907	2.159086
101	0.69901276	-8.42362400	-5.88822066		101.00000000	0.34000000	-2.86403216	2.180555
09:01 04/04/2018
Test Lot:	JK-PERC
Recipe:	Recipe_YJX-LID
Cell Name:	3-8-10h
Test Order:	3
Test Condition:	Light
1	-0.29993299	9.06056210	-2.71756148		1.00000000	34.34000000	311.13970251	0.000000
2	-0.29017666	9.07115360	-2.63223705		2.00000000	17.17000000	155.75170731	0.061776
3	-0.28003258	9.06470970	-2.53841404		3.00000000	11.44666667	103.76071037	0.083259
4	-0.27020627	9.06220150	-2.44866367		4.00000000	8.58500000	77.79899988	0.104786
5	-0.26002350	9.08075810	-2.36121050		5.00000000	6.86800000	62.36664663	0.126180
6	-0.24987718	9.06690600	-2.26561290		6.00000000	5.72333333	51.89292534	0.147546
7	-0.24006578	9.07400230	-2.17835744		7.00000000	4.90571429	44.51446271	0.168924
8	-0.22991277	9.06134030	-2.08331785		8.00000000	4.29250000	38.89580324	0.190394
9	-0.22008350	9.06951810	-1.99605129		9.00000000	3.81555556	34.60525017	0.211796
10	-0.20995356	9.07352350	-1.90501856		10.00000000	3.43400000	31.15847970	0.233143
11	-0.20013322	9.06267550	-1.81374243		11.00000000	3.12181818	28.29202515	0.254501
12	-0.18995118	9.07759190	-1.72429929		12.00000000	2.86166667	25.97704215	0.275986
13	-0.18019858	9.05332760	-1.63139678		13.00000000	2.64153846	23.91471306	0.297360
14	-0.17005226	9.08769610	-1.54538326		14.00000000	2.45285714	22.29082029	0.318721
15	-0.16025798	9.05549240	-1.45121492		15.00000000	2.28933333	20.73104060	0.340098
16	-0.15007073	9.07381530	-1.36171409		16.00000000	2.14625000	19.47467609	0.361570
17	-0.13991548	9.06076240	-1.26774092		17.00000000	2.02000000	18.30274005	0.382962
18	-0.13012566	9.06843660	-1.18003630		18.00000000	1.90777778	17.30056182	0.404319
19	-0.11996223	9.06807420	-1.08782640		19.00000000	1.80736842	16.38935095	0.425677
20	-0.11011957	9.06723310	-0.99847981		20.00000000	1.71700000	15.56843923	0.447150
21	-0.09995911	9.06271360	-0.90590081		21.00000000	1.63523810	14.81969452	0.468525
22	-0.09013505	9.07078930	-0.81759607		22.00000000	1.56090909	14.15867748	0.489911
23	-0.08001553	9.05945590	-0.72489719		23.00000000	1.49304348	13.52616155	0.511265
24	-0.07018925	9.06760690	-0.63644848		24.00000000	1.43083333	12.97423421	0.532723
25	-0.06003028	9.04782870	-0.54314367		25.00000000	1.37360000	12.42809750	0.554093
26	-0.04986833	9.07969190	-0.45278911		26.00000000	1.32076923	11.99217769	0.575486
27	-0.04010382	9.05612950	-0.36318538		27.00000000	1.27185185	11.51805508	0.596983
28	-0.02990838	9.05667880	-0.27087062		28.00000000	1.22642857	11.10736964	0.618375
29	-0.02009028	9.07553770	-0.18233009		29.00000000	1.18413793	10.74668844	0.639717
30	-0.00997299	9.06582260	-0.09041337		30.00000000	1.14466667	10.37734494	0.661079
31	-0.00068033	9.05579950	-0.00616091		31.00000000	1.10774194	10.03148887	0.682676
32	0.00948736	9.07178400	0.08606730		32.00000000	1.07312500	9.73515821	0.704049
33	0.01924341	9.06691270	0.17447835		33.00000000	1.04060606	9.43508431	0.725396
34	0.02943930	9.07153220	0.26705958		34.00000000	1.01000000	9.16224752	0.746777
35	0.03924224	9.05822750	0.35546516		35.00000000	0.98114286	8.88741521	0.768251
36	0.04939124	9.07412430	0.44818229		36.00000000	0.95388889	8.65570635	0.789617
37	0.05920683	9.05596260	0.53617486		37.00000000	0.92810811	8.40491232	0.810986
38	0.06936923	9.07681470	0.62965168		38.00000000	0.90368421	8.20257413	0.832359
39	0.07950261	9.06014820	0.72030538		39.00000000	0.88051282	7.97757665	0.853841
40	0.08934350	9.07098480	0.81043349		40.00000000	0.85850000	7.78744045	0.875226
41	0.09948506	9.05687050	0.90102326		41.00000000	0.83756098	7.58568129	0.896566
42	0.10927981	9.06077580	0.99015986		42.00000000	0.81761905	7.40826288	0.917945
43	0.11943104	9.06119160	1.08218754		43.00000000	0.79860465	7.23630976	0.939415
44	0.12925407	9.06255530	1.17137216		44.00000000	0.78045455	7.07291248	0.960783
45	0.13940307	9.07288550	1.26478809		45.00000000	0.76311111	6.92361973	0.982139
46	0.14921272	9.05740830	1.35148053		46.00000000	0.74652174	6.76155220	1.003510
47	0.15939669	9.06597140	1.44508583		47.00000000	0.73063830	6.62394591	1.024984
48	0.16950178	9.05632970	1.53506400		48.00000000	0.71541667	6.47904921	1.046365
49	0.17936799	9.07876010	1.62843895		49.00000000	0.70081633	6.36254330	1.067744
50	0.18950509	9.05626490	1.71620829		50.00000000	0.68680000	6.21984273	1.089101
51	0.19929463	9.06766220	1.80713638		51.00000000	0.67333333	6.10555921	1.110572
52	0.20942651	9.05781360	1.89694629		52.00000000	0.66038462	5.98164075	1.131941
53	0.21926740	9.07056240	1.98887863		53.00000000	0.64792453	5.87703986	1.153315
54	0.22937547	9.05980490	2.07809701		54.00000000	0.63592593	5.76136482	1.174679
55	0.23922306	9.06598950	2.16879375		55.00000000	0.62436364	5.66047417	1.196146
56	0.24938621	9.07471850	2.26310965		56.00000000	0.61321429	5.56474702	1.217519
57	0.25950098	9.04659370	2.34759993		57.00000000	0.60245614	5.45017592	1.238908
58	0.26936641	9.08901120	2.44827432		58.00000000	0.59206897	5.38132146	1.260383
59	0.27951318	9.06464960	2.53368904		59.00000000	0.58203390	5.27593334	1.281770
60	0.28930572	9.06821440	2.62348630		60.00000000	0.57233333	5.19004137	1.303110
61	0.29947183	9.06277560	2.71404599		61.00000000	0.56295082	5.10189695	1.324493
62	0.30927253	9.06378650	2.80318018		62.00000000	0.55387097	5.02016820	1.345981
63	0.31940070	9.05972100	2.89368123		63.00000000	0.54507937	4.93826697	1.367347
64	0.32925573	9.06497190	2.98469394		64.00000000	0.53656250	4.86392399	1.388683
65	0.33937794	9.06253810	3.07562551		65.00000000	0.52830769	4.78780859	1.410072
66	0.34919727	9.05788900	3.16299011		66.00000000	0.52030303	4.71284709	1.431538
67	0.35936636	9.06412410	3.25734128		67.00000000	0.51253731	4.64570181	1.452926
68	0.36949527	9.06037240	3.34776475		68.00000000	0.50500000	4.57548806	1.474280
69	0.37933987	9.06129840	3.43731176		69.00000000	0.49768116	4.50963749	1.495652
70	0.38950449	9.06615640	3.53130862		70.00000000	0.49057143	4.44759730	1.517128
71	0.39930817	9.06799410	3.62092413		71.00000000	0.48366197	4.38584391	1.538505
72	0.40945572	9.06753160	3.71275268		72.00000000	0.47694444	4.32470882	1.559861
73	0.41927204	9.04993440	3.79438446		73.00000000	0.47041096	4.25718832	1.581242
74	0.42942476	9.06274700	3.89176796		74.00000000	0.46405405	4.20560449	1.602717
75	0.43921429	9.05700590	3.97796642		75.00000000	0.45786667	4.14690110	1.624099
76	0.44940051	9.05006310	4.06710297		76.00000000	0.45184211	4.08919956	1.645451
77	0.45954728	9.04278850	4.15558886		77.00000000	0.44597403	4.03284879	1.666829
78	0.46940231	9.04621320	4.24631337		78.00000000	0.44025641	3.98265335	1.688302
79	0.47952899	9.05278020	4.34107055		79.00000000	0.43468354	3.93509458	1.709685
80	0.48931557	9.03482440	4.42088025		80.00000000	0.42925000	3.87819837	1.731049
81	0.49951592	9.02946190	4.51035997		81.00000000	0.42395062	3.82804595	1.752409
82	0.50931585	8.99129490	4.57940900		82.00000000	0.41878049	3.76537886	1.773895
83	0.51941800	8.97927380	4.66399644		83.00000000	0.41373494	3.71503930	1.795264
84	0.52925593	8.94702820	4.73526773		84.00000000	0.40880952	3.65763034	1.816641
85	0.53935206	8.91112800	4.80623524		85.00000000	0.40400000	3.60009571	1.837994
86	0.54949212	8.83165170	4.85292302		86.00000000	0.39930233	3.52649906	1.859472
87	0.55931294	8.74678520	4.89219015		87.00000000	0.39471264	3.45246671	1.880854
88	0.56949764	8.60431860	4.90013914		88.00000000	0.39022727	3.35763978	1.902234
89	0.57928795	8.44176100	4.89021042		89.00000000	0.38584270	3.25719183	1.923706
90	0.58941835	8.16790010	4.81431020		90.00000000	0.38155556	3.11650766	1.945094
91	0.59922427	7.84737920	4.70234007		91.00000000	0.37736264	2.96130771	1.966434
92	0.60933906	7.35646490	4.48258141		92.00000000	0.37326087	2.74588049	1.987901
93	0.61913824	6.76036790	4.18560228		93.00000000	0.36924731	2.49624767	2.009407
94	0.62924927	5.92091850	3.72573364		94.00000000	0.36531915	2.16302491	2.030787
95	0.63934767	4.84663960	3.09868774		95.00000000	0.36147368	1.75193267	2.052138
96	0.64915806	3.52866360	2.29066042		96.00000000	0.35770833	1.26223238	2.073577
97	0.65922743	1.86041300	1.22643528		97.00000000	0.35402062	0.65862456	2.095073
98	0.66899616	-0.10586747	-0.07082493		98.00000000	0.35040816	-0.03709683	2.116503
99	0.67905509	-2.51690200	-1.70911511		99.00000000	0.34686869	-0.87303449	2.137866
100	0.68876201	-5.26538800	-3.62659922		100.00000000	0.34340000	-1.80813424	2.159235
101	0.69905245	-8.55631830	-5.98131527		101.00000000	0.34000000	-2.90914822	2.180710
09:01 04/04/2018
Test Lot:	JK-PERC
Recipe:	Recipe_YJX-LID
Cell Name:	3-8-10h
Test Order:	4
Test Condition:	Light
1	-0.29998881	9.06715770	-2.72004585		1.00000000	34.34000000	311.36619542	0.000000
2	-0.29010594	9.07513050	-2.63274926		2.00000000	17.17000000	155.81999069	0.021612
3	-0.27999610	9.06557270	-2.53832500		3.00000000	11.44666667	103.77058884	0.043013
4	-0.27021223	9.06194590	-2.44864861		4.00000000	8.58500000	77.79680555	0.064399
5	-0.26002946	9.07627390	-2.36009860		5.00000000	6.86800000	62.33584915	0.085774
6	-0.24990323	9.06047530	-2.26424204		6.00000000	5.72333333	51.85612030	0.107269
7	-0.24009258	9.07286930	-2.17832860		7.00000000	4.90571429	44.50890454	0.128660
8	-0.22995518	9.06456760	-2.08444427		8.00000000	4.29250000	38.90965642	0.150005
9	-0.22011401	9.06380180	-1.99506976		9.00000000	3.81555556	34.58343931	0.171444
10	-0.20995133	9.06794070	-1.90382621		10.00000000	3.43400000	31.13930836	0.192951
11	-0.20011982	9.06962300	-1.81501132		11.00000000	3.12181818	28.31371398	0.214327
12	-0.18998095	9.06524370	-1.72222361		12.00000000	2.86166667	25.94170572	0.235721
13	-0.18021123	9.06625180	-1.63384039		13.00000000	2.64153846	23.94885283	0.257078
14	-0.17006193	9.06398390	-1.54143860		14.00000000	2.45285714	22.23265765	0.278552
15	-0.16020142	9.06351280	-1.45198762		15.00000000	2.28933333	20.74940197	0.299936
16	-0.15007222	9.06224440	-1.35999114		16.00000000	2.14625000	19.44984204	0.321325
17	-0.13991846	9.06719110	-1.26866742		17.00000000	2.02000000	18.31572602	0.342774
18	-0.13011524	9.06364350	-1.17931815		18.00000000	1.90777778	17.29141766	0.364240
19	-0.11996967	9.06538390	-1.08757111		19.00000000	1.80736842	16.38448859	0.385608
20	-0.11010022	9.06893060	-0.99849125		20.00000000	1.71700000	15.57135384	0.406985
21	-0.09996730	9.06112290	-0.90581600		21.00000000	1.63523810	14.81709335	0.428357
22	-0.09014548	9.07440280	-0.81801636		22.00000000	1.56090909	14.16431783	0.449855
23	-0.08000809	9.06612300	-0.72536318		23.00000000	1.49304348	13.53611582	0.471246
24	-0.07016915	9.05892660	-0.63565719		24.00000000	1.43083333	12.96181414	0.492623
25	-0.06005409	9.06796260	-0.54456828		25.00000000	1.37360000	12.45575343	0.513988
26	-0.04987950	9.05022140	-0.45142051		26.00000000	1.32076923	11.95325396	0.535461
27	-0.04009266	9.06280040	-0.36335173		27.00000000	1.27185185	11.52653947	0.556833
28	-0.02993369	9.06667040	-0.27139887		28.00000000	1.22642857	11.11962363	0.578229
29	-0.02010517	9.06365680	-0.18222632		29.00000000	1.18413793	10.73261981	0.599597
30	-0.00997001	9.07520390	-0.09047991		30.00000000	1.14466667	10.38808340	0.621086
31	-0.00068703	9.06738190	-0.00622953		31.00000000	1.10774194	10.04431918	0.642577
32	0.00946429	9.06522180	0.08579591		32.00000000	1.07312500	9.72811614	0.663973
33	0.01928360	9.05940440	0.17469795		33.00000000	1.04060606	9.42727112	0.685469
34	0.02940507	9.06791210	0.26664258		34.00000000	1.01000000	9.15859122	0.706842
35	0.03923703	9.07020380	0.35588786		35.00000000	0.98114286	8.89916567	0.728207
36	0.04940241	9.06698610	0.44793092		36.00000000	0.95388889	8.64889730	0.749587
37	0.05921130	9.06782910	0.53691794		37.00000000	0.92810811	8.41592571	0.771075
38	0.06935658	9.05890180	0.62829441		38.00000000	0.90368421	8.18638652	0.792476
39	0.07950484	9.06376840	0.72061346		39.00000000	0.88051282	7.98076428	0.813825
40	0.08934052	9.06566910	0.80993162		40.00000000	0.85850000	7.78287692	0.835224
41	0.09948134	9.05429740	0.90073361		41.00000000	0.83756098	7.58352616	0.856703
42	0.10928353	9.06661890	0.99083212		42.00000000	0.81761905	7.41304031	0.878092
43	0.11946081	9.06476310	1.08288394		43.00000000	0.79860465	7.23916197	0.899457
44	0.12928534	9.06353470	1.17178217		44.00000000	0.78045455	7.07367685	0.920848
45	0.13944624	9.07312300	1.26521289		45.00000000	0.76311111	6.92380097	0.942340
46	0.14925067	9.04594230	1.35011295		46.00000000	0.74652174	6.75299258	0.963736
47	0.15940562	9.07145880	1.44604151		47.00000000	0.73063830	6.62795522	0.985096
48	0.16954793	9.05693910	1.53558528		48.00000000	0.71541667	6.47948518	1.006464
49	0.17936724	9.05779550	1.62467178		49.00000000	0.70081633	6.34785097	1.027952
50	0.18952294	9.06986520	1.71894752		50.00000000	0.68680000	6.22918342	1.049347
51	0.19929983	9.06710430	1.80707235		51.00000000	0.67333333	6.10518356	1.070696
52	0.20943247	9.05610660	1.89664277		52.00000000	0.66038462	5.98051347	1.092082
53	0.21923168	9.06488130	1.98730916		53.00000000	0.64792453	5.87335894	1.113575
54	0.22941342	9.05793190	2.07801114		54.00000000	0.63592593	5.76017373	1.134964
55	0.23920445	9.06606010	2.16864192		55.00000000	0.62436364	5.66051825	1.156368
56	0.24939068	9.05782700	2.25893763		56.00000000	0.61321429	5.55438891	1.177738
57	0.25951585	9.05977820	2.35115604		57.00000000	0.60245614	5.45811901	1.199225
58	0.26935005	9.06026550	2.44038297		58.00000000	0.59206897	5.36430202	1.220605
59	0.27946109	9.06251810	2.53262119		59.00000000	0.58203390	5.27469274	1.241996
60	0.28926402	9.05433750	2.61909406		60.00000000	0.57233333	5.18209916	1.263362
61	0.29943612	9.07231140	2.71657773		61.00000000	0.56295082	5.10726514	1.284842
62	0.30927923	9.05899050	2.80175761		62.00000000	0.55387097	5.01751184	1.306216
63	0.31938955	9.06364820	2.89483452		63.00000000	0.54507937	4.94040761	1.327603
64	0.32923266	9.05571560	2.98143734		64.00000000	0.53656250	4.85895740	1.349083
65	0.33939728	9.06374360	3.07620992		65.00000000	0.52830769	4.78844546	1.370459
66	0.34921959	9.05695720	3.16286688		66.00000000	0.52030303	4.71236228	1.391828
67	0.35935891	9.05996320	3.25577850		67.00000000	0.51253731	4.64356920	1.413205
68	0.36949822	9.05938720	3.34742744		68.00000000	0.50500000	4.57499054	1.434686
69	0.37934434	9.05819610	3.43617542		69.00000000	0.49768116	4.50809354	1.456065
70	0.38947400	9.06998160	3.53252201		70.00000000	0.49057143	4.44947383	1.477414
71	0.39927918	9.04286190	3.61062648		71.00000000	0.48366197	4.37368842	1.498793
72	0.40944976	9.05845450	3.70898202		72.00000000	0.47694444	4.32037955	1.520285
73	0.41923854	9.04616640	3.79250159		73.00000000	0.47041096	4.25541581	1.541675
74	0.42940912	9.04593280	3.88440604		74.00000000	0.46405405	4.19780179	1.563047
75	0.43923959	9.05010800	3.97516573		75.00000000	0.45786667	4.14374278	1.584432
76	0.44937372	9.05351450	4.06841149		76.00000000	0.45184211	4.09075905	1.605913
77	0.45951751	9.04997830	4.15862349		77.00000000	0.44597403	4.03605526	1.627299
78	0.46939710	9.03999610	4.24334795		78.00000000	0.44025641	3.97991623	1.648639
79	0.47955802	9.03778840	4.33414391		79.00000000	0.43468354	3.92857789	1.670028
80	0.48935798	9.02960210	4.41870784		80.00000000	0.42925000	3.87595670	1.691512
81	0.49948540	9.01681330	4.50376660		81.00000000	0.42395062	3.82268356	1.712886
82	0.50930619	8.99626830	4.58185513		82.00000000	0.41878049	3.76746163	1.734255
83	0.51945072	8.98810770	4.66887902		83.00000000	0.41373494	3.71869420	1.755639
84	0.52923286	8.94760610	4.73536717		84.00000000	0.40880952	3.65786659	1.777135
85	0.53934759	8.89847090	4.79936883		85.00000000	0.40400000	3.59498224	1.798524
86	0.54951000	8.82124610	4.84736294		86.00000000	0.39930233	3.52234408	1.819888
87	0.55931294	8.75139810	4.89477020		87.00000000	0.39471264	3.45428748	1.841256
88	0.56944782	8.60396290	4.89950792		88.00000000	0.39022727	3.35750098	1.862731
89	0.57925147	8.44150260	4.88975279		89.00000000	0.38584270	3.25709213	1.884106
90	0.58939976	8.17415330	4.81784399		90.00000000	0.38155556	3.11889360	1.905480
91	0.59921014	7.84656720	4.70174263		91.00000000	0.37736264	2.96100129	1.926863
92	0.60931522	7.37105130	4.49129374		92.00000000	0.37326087	2.75132502	1.948350
93	0.61910552	6.76316930	4.18711545		93.00000000	0.36924731	2.49728208	1.969730
94	0.62921727	5.92210870	3.72629307		94.00000000	0.36531915	2.16345971	1.991215
95	0.63931566	4.85034040	3.10089857		95.00000000	0.36147368	1.75327041	2.012725
96	0.64914018	3.53578450	2.29521979		96.00000000	0.35770833	1.26477958	2.034124
97	0.65924680	1.84018330	1.21313495		97.00000000	0.35402062	0.65146283	2.055476
98	0.66900659	-0.12698877	-0.08495632		98.00000000	0.35040816	-0.04449790	2.076863
99	0.67902237	-2.56110290	-1.73904616		99.00000000	0.34686869	-0.88836640	2.098360
100	0.68875903	-5.33309980	-3.67322065		100.00000000	0.34340000	-1.83138647	2.119743
101	0.69902563	-8.65542320	-6.05036266		101.00000000	0.34000000	-2.94284389	2.141096
