# Supplementary material for: Study on the Electrical Injection Regeneration of Industrialized B-Doped Czochralski Silicon PERC Solar Cells
Source: Hindawi journal article supplement (doi:10.1155/2019/5357370), 2019-06-20
Supplement: f1 [file 5357370.f1.zip › section3.3/IVRawData_3-8-11h.csv]

10:03 04/04/2018
Test Lot:	JK-PERC
Recipe:	Recipe_YJX-LID
Cell Name:	3-8-11h
Test Order:	2
Test Condition:	Light
1	-0.29992601	9.07861330	-2.72291226		1.00000000	34.34000000	311.75958072	0.000000
2	-0.29013953	9.08227160	-2.63512601		2.00000000	17.17000000	155.94260337	0.061781
3	-0.28003377	9.07002350	-2.53991287		3.00000000	11.44666667	103.82153566	0.083251
4	-0.27020413	9.08295440	-2.45425179		4.00000000	8.58500000	77.97716352	0.104754
5	-0.26002467	9.06540970	-2.35723017		5.00000000	6.86800000	62.26123382	0.126131
6	-0.24987648	9.06411460	-2.26490905		6.00000000	5.72333333	51.87694923	0.147465
7	-0.24007140	9.08769700	-2.18169614		7.00000000	4.90571429	44.58164500	0.168848
8	-0.22993585	9.06006530	-2.08323382		8.00000000	4.29250000	38.89033030	0.190338
9	-0.22010769	9.07813450	-1.99816721		9.00000000	3.81555556	34.63812653	0.211725
10	-0.20994908	9.06017210	-1.90217480		10.00000000	3.43400000	31.11263099	0.233068
11	-0.20015293	9.07865330	-1.81711906		11.00000000	3.12181818	28.34190494	0.254438
12	-0.18998463	9.06552310	-1.72231005		12.00000000	2.86166667	25.94250527	0.275907
13	-0.18021305	9.08771040	-1.63772401		13.00000000	2.64153846	24.00553655	0.297292
14	-0.17007305	9.06708150	-1.54206621		14.00000000	2.45285714	22.24025562	0.318636
15	-0.16022331	9.08109660	-1.45500336		15.00000000	2.28933333	20.78965715	0.340018
16	-0.15008925	9.07086180	-1.36143884		16.00000000	2.14625000	19.46833714	0.361497
17	-0.13994403	9.07457830	-1.26993306		17.00000000	2.02000000	18.33064817	0.382869
18	-0.13013077	9.07323460	-1.18070700		18.00000000	1.90777778	17.30971534	0.404228
19	-0.11998183	9.06596470	-1.08775104		19.00000000	1.80736842	16.38553831	0.425603
20	-0.11013878	9.07374000	-0.99937065		20.00000000	1.71700000	15.57961158	0.447072
21	-0.09998836	9.07164960	-0.90705933		21.00000000	1.63523810	14.83430701	0.468455
22	-0.09014755	9.08055590	-0.81858984		22.00000000	1.56090909	14.17392225	0.489813
23	-0.08001200	9.07199290	-0.72586830		23.00000000	1.49304348	13.54487983	0.511179
24	-0.07017715	9.07695290	-0.63699471		24.00000000	1.43083333	12.98760677	0.532655
25	-0.06006468	9.07371040	-0.54500952		25.00000000	1.37360000	12.46364861	0.554014
26	-0.04988002	9.06614490	-0.45221946		26.00000000	1.32076923	11.97428523	0.575401
27	-0.04007196	9.08019920	-0.36386135		27.00000000	1.27185185	11.54866817	0.596749
28	-0.02990962	9.07202340	-0.27134077		28.00000000	1.22642857	11.12618870	0.618229
29	-0.02009784	9.07134060	-0.18231434		29.00000000	1.18413793	10.74171849	0.639621
30	-0.00994815	9.07676600	-0.09029707		30.00000000	1.14466667	10.38987148	0.661001
31	-0.00067821	9.06216810	-0.00614602		31.00000000	1.10774194	10.03854363	0.682598
32	0.00947201	9.08605480	0.08606324		32.00000000	1.07312500	9.75047256	0.703977
33	0.01929170	9.04769420	0.17454543		33.00000000	1.04060606	9.41508542	0.725313
34	0.02942472	9.08336830	0.26727560		34.00000000	1.01000000	9.17420198	0.746685
35	0.03923325	9.06127360	0.35550320		35.00000000	0.98114286	8.89040387	0.768159
36	0.04938487	9.08456610	0.44864014		36.00000000	0.95388889	8.66566666	0.789547
37	0.05921647	9.05945970	0.53646925		37.00000000	0.92810811	8.40815800	0.810893
38	0.06935396	9.07361320	0.62929101		38.00000000	0.90368421	8.19968098	0.832271
39	0.07949963	9.06065650	0.72031886		39.00000000	0.88051282	7.97802421	0.853760
40	0.08932304	9.08392910	0.81140413		40.00000000	0.85850000	7.79855313	0.875151
41	0.09947243	9.07710460	0.90292168		41.00000000	0.83756098	7.60262858	0.896498
42	0.10928245	9.06670950	0.99083223		42.00000000	0.81761905	7.41311439	0.917869
43	0.11941323	9.07011890	1.08309219		43.00000000	0.79860465	7.24343914	0.939341
44	0.12926418	9.06884380	1.17227666		44.00000000	0.78045455	7.07782037	0.960716
45	0.13938679	9.06945610	1.26416237		45.00000000	0.76311111	6.92100272	0.982057
46	0.14919606	9.06482030	1.35243547		46.00000000	0.74652174	6.76708542	1.003429
47	0.15937001	9.07543950	1.44635288		47.00000000	0.73063830	6.63086367	1.024906
48	0.16950749	9.06751730	1.53701210		48.00000000	0.71541667	6.48705300	1.046281
49	0.17934281	9.07549570	1.62762490		49.00000000	0.70081633	6.36025556	1.067643
50	0.18947658	9.06744860	1.71806915		50.00000000	0.68680000	6.22752370	1.089020
51	0.19927245	9.06688980	1.80678134		51.00000000	0.67333333	6.10503913	1.110497
52	0.20939729	9.07132530	1.89951093		52.00000000	0.66038462	5.99056367	1.131872
53	0.21923557	9.07146740	1.98878833		53.00000000	0.64792453	5.87762624	1.153231
54	0.22937603	9.06169130	2.07853478		54.00000000	0.63592593	5.76256443	1.174600
55	0.23920615	9.07556630	2.17093127		55.00000000	0.62436364	5.66645358	1.196069
56	0.24936372	9.06039910	2.25933482		56.00000000	0.61321429	5.55596616	1.217434
57	0.25951162	9.08080960	2.35657561		57.00000000	0.60245614	5.47078950	1.238822
58	0.26932687	9.07165240	2.44323975		58.00000000	0.59206897	5.37104385	1.260159
59	0.27947849	9.06861500	2.53448283		59.00000000	0.58203390	5.27824134	1.281659
60	0.28931305	9.07104210	2.62437086		60.00000000	0.57233333	5.19165976	1.303038
61	0.29945651	9.06595990	2.71486071		61.00000000	0.56295082	5.10368956	1.324412
62	0.30926576	9.06421950	2.80325273		62.00000000	0.55387097	5.02040803	1.345895
63	0.31943452	9.06096840	2.89438609		63.00000000	0.54507937	4.93894690	1.367273
64	0.32923931	9.07990360	2.98946120		64.00000000	0.53656250	4.87193578	1.388618
65	0.33939317	9.06658080	3.07713560		65.00000000	0.52830769	4.78994438	1.409986
66	0.34920022	9.06269070	3.16469359		66.00000000	0.52030303	4.71534543	1.431459
67	0.35934961	9.07221510	3.26009696		67.00000000	0.51253731	4.64984875	1.452828
68	0.36951685	9.06939600	3.35129464		68.00000000	0.50500000	4.58004498	1.474178
69	0.37933284	9.06806760	3.43981584		69.00000000	0.49768116	4.51300640	1.495556
70	0.38951051	9.07790950	3.53594116		70.00000000	0.49057143	4.45336303	1.517021
71	0.39930859	9.06682780	3.62046222		71.00000000	0.48366197	4.38527981	1.538410
72	0.40944237	9.05495070	3.70748047		72.00000000	0.47694444	4.31870843	1.559758
73	0.41928661	9.07456300	3.80484276		73.00000000	0.47041096	4.26877388	1.581130
74	0.42940626	9.05608370	3.88873903		74.00000000	0.46405405	4.20251235	1.602622
75	0.43922296	9.05989550	3.97931412		75.00000000	0.45786667	4.14822415	1.624001
76	0.44937980	9.06258390	4.07254214		76.00000000	0.45184211	4.09485699	1.645338
77	0.45950165	9.04254720	4.15506536		77.00000000	0.44597403	4.03274118	1.666716
78	0.46936449	9.05957980	4.25224505		78.00000000	0.44025641	3.98853808	1.688193
79	0.47952357	9.03212830	4.33111841		79.00000000	0.43468354	3.92611754	1.709564
80	0.48934102	9.05024910	4.42865813		80.00000000	0.42925000	3.88481943	1.730920
81	0.49947554	9.00832840	4.49943969		81.00000000	0.42395062	3.81908639	1.752287
82	0.50928557	9.01147940	4.58941642		82.00000000	0.41878049	3.77383174	1.773753
83	0.51941264	8.97623830	4.66237163		83.00000000	0.41373494	3.71378341	1.795126
84	0.52920330	8.94574070	4.73411550		84.00000000	0.40880952	3.65710400	1.816491
85	0.53938019	8.89459320	4.79756737		85.00000000	0.40400000	3.59341565	1.837862
86	0.54953331	8.82923320	4.85195775		86.00000000	0.39930233	3.52553335	1.859350
87	0.55931211	8.72391220	4.87938974		87.00000000	0.39471264	3.44343845	1.880731
88	0.56944358	8.60644820	4.90088667		88.00000000	0.39022727	3.35847081	1.902122
89	0.57927299	8.40537830	4.86900862		89.00000000	0.38584270	3.24315383	1.923474
90	0.58938962	8.14165970	4.79860972		90.00000000	0.38155556	3.10649549	1.944947
91	0.59917581	7.80176260	4.67462743		91.00000000	0.37736264	2.94409371	1.966323
92	0.60929024	7.30946020	4.45358276		92.00000000	0.37326087	2.72833547	1.987807
93	0.61913520	6.68060060	4.13619499		93.00000000	0.36924731	2.46679381	2.009300
94	0.62922060	5.83808420	3.67344284		94.00000000	0.36531915	2.13276395	2.030691
95	0.63935959	4.76615810	3.04728889		95.00000000	0.36147368	1.72284073	2.052040
96	0.64913386	3.46304820	2.24798185		96.00000000	0.35770833	1.23876120	2.073420
97	0.65926319	1.80543830	1.19025901		97.00000000	0.35402062	0.63916238	2.094942
98	0.66899580	-0.11452169	-0.07661453		98.00000000	0.35040816	-0.04012934	2.116319
99	0.67906928	-2.42731020	-1.64831179		99.00000000	0.34686869	-0.84195790	2.137677
100	0.68878627	-5.04313330	-3.47364097		100.00000000	0.34340000	-1.73181198	2.159047
101	0.69903982	-8.15931130	-5.70368350		101.00000000	0.34000000	-2.77416584	2.180529
10:03 04/04/2018
Test Lot:	JK-PERC
Recipe:	Recipe_YJX-LID
Cell Name:	3-8-11h
Test Order:	3
Test Condition:	Light
1	-0.29997513	9.07231040	-2.72146749		1.00000000	34.34000000	311.54313914	0.000000
2	-0.29008743	9.07661250	-2.63301119		2.00000000	17.17000000	155.84543663	0.021579
3	-0.27995935	9.07142730	-2.53963089		3.00000000	11.44666667	103.83760449	0.042988
4	-0.27020785	9.07743550	-2.45279433		4.00000000	8.58500000	77.92978377	0.064354
5	-0.26003882	9.07154270	-2.35895326		5.00000000	6.86800000	62.30335526	0.085777
6	-0.24988019	9.07426450	-2.26747894		6.00000000	5.72333333	51.93504049	0.107271
7	-0.24005726	9.07465840	-2.17843763		7.00000000	4.90571429	44.51768135	0.128675
8	-0.22990534	9.07554910	-2.08651720		8.00000000	4.29250000	38.95679451	0.150009
9	-0.22010398	9.07439800	-1.99731112		9.00000000	3.81555556	34.62386970	0.171393
10	-0.20993643	9.06505390	-1.90308505		10.00000000	3.43400000	31.12939509	0.192886
11	-0.20012763	9.08434300	-1.81802803		11.00000000	3.12181818	28.35966715	0.214248
12	-0.18999209	9.06504730	-1.72228728		12.00000000	2.86166667	25.94114369	0.235605
13	-0.18019742	9.08808420	-1.63764933		13.00000000	2.64153846	24.00652396	0.256980
14	-0.17004253	9.07229710	-1.54267635		14.00000000	2.45285714	22.25304874	0.278445
15	-0.16024190	9.06021210	-1.45182560		15.00000000	2.28933333	20.74184557	0.299848
16	-0.15009966	9.06269260	-1.36030708		16.00000000	2.14625000	19.45080399	0.321195
17	-0.13993138	9.07667260	-1.27011132		17.00000000	2.02000000	18.33487865	0.342570
18	-0.13012704	9.06014730	-1.17897015		18.00000000	1.90777778	17.28474768	0.364055
19	-0.11997959	9.07388690	-1.08868123		19.00000000	1.80736842	16.39985664	0.385431
20	-0.11016408	9.05757050	-0.99781892		20.00000000	1.71700000	15.55184855	0.406797
21	-0.10000026	9.08625510	-0.90862787		21.00000000	1.63523810	14.85819048	0.428171
22	-0.09016988	9.05759910	-0.81672260		22.00000000	1.56090909	14.13808878	0.449646
23	-0.08003136	9.06842990	-0.72575876		23.00000000	1.49304348	13.53956012	0.471030
24	-0.07018385	9.07481480	-0.63690545		24.00000000	1.43083333	12.98454751	0.492406
25	-0.06005649	9.08054450	-0.54534566		25.00000000	1.37360000	12.47303593	0.513744
26	-0.04988299	9.07491020	-0.45268368		26.00000000	1.32076923	11.98586216	0.535217
27	-0.04007717	9.06184960	-0.36317324		27.00000000	1.27185185	11.52533019	0.556586
28	-0.02992451	9.08347510	-0.27181851		28.00000000	1.22642857	11.14023339	0.577971
29	-0.02010900	9.07816310	-0.18255280		29.00000000	1.18413793	10.74979727	0.599460
30	-0.00996900	9.05464840	-0.09026575		30.00000000	1.14466667	10.36455420	0.620835
31	-0.00068044	9.06729980	-0.00616974		31.00000000	1.10774194	10.04422823	0.642299
32	0.00945341	9.08731370	0.08590608		32.00000000	1.07312500	9.75182351	0.663679
33	0.01928798	9.06511880	0.17484784		33.00000000	1.04060606	9.43321756	0.685167
34	0.02941356	9.06363870	0.26659387		34.00000000	1.01000000	9.15427509	0.706541
35	0.03926599	9.08745000	0.35682776		35.00000000	0.98114286	8.91608666	0.727904
36	0.04938264	9.05102350	0.44696345		36.00000000	0.95388889	8.63367075	0.749276
37	0.05921796	9.09589770	0.53864051		37.00000000	0.92810811	8.44197641	0.770744
38	0.06935842	9.06676960	0.62885684		38.00000000	0.90368421	8.19349653	0.792134
39	0.07950484	9.05864520	0.72020614		39.00000000	0.88051282	7.97625324	0.813473
40	0.08932973	9.08035090	0.81114533		40.00000000	0.85850000	7.79548125	0.834858
41	0.09946723	9.06615350	0.90178513		41.00000000	0.83756098	7.59345637	0.856342
42	0.10925788	9.06614490	0.99054777		42.00000000	0.81761905	7.41265276	0.877714
43	0.11942291	9.07846640	1.08417688		43.00000000	0.79860465	7.25010549	0.899075
44	0.12923442	9.06487560	1.17149394		44.00000000	0.78045455	7.07472337	0.920446
45	0.13937265	9.07948490	1.26543187		45.00000000	0.76311111	6.92865581	0.941956
46	0.14921242	9.06877040	1.35317318		46.00000000	0.74652174	6.77003425	0.963348
47	0.15935065	9.08194640	1.44721406		47.00000000	0.73063830	6.63561786	0.984691
48	0.16950451	9.06767560	1.53701191		48.00000000	0.71541667	6.48716625	1.006061
49	0.17932123	9.07423110	1.62720228		49.00000000	0.70081633	6.35936931	1.027538
50	0.18946467	9.06533240	1.71756021		50.00000000	0.68680000	6.22607029	1.048919
51	0.19923970	9.06957630	1.80701966		51.00000000	0.67333333	6.10684804	1.070287
52	0.20940547	9.07932090	1.90125946		52.00000000	0.66038462	5.99584384	1.091652
53	0.21924078	9.06793790	1.98806178		53.00000000	0.64792453	5.87533939	1.113125
54	0.22937901	9.06815430	2.08004426		54.00000000	0.63592593	5.76667442	1.134509
55	0.23918828	9.07753560	2.17124013		55.00000000	0.62436364	5.66768314	1.155892
56	0.24935330	9.07154080	2.26201863		56.00000000	0.61321429	5.56279841	1.177244
57	0.25949153	9.06388570	2.35200157		57.00000000	0.60245614	5.46059360	1.198708
58	0.26931271	9.06975840	2.44260121		58.00000000	0.59206897	5.36992247	1.220073
59	0.27947402	9.07326790	2.53574265		59.00000000	0.58203390	5.28094949	1.241456
60	0.28930339	9.06553460	2.62268989		60.00000000	0.57233333	5.18850764	1.262938
61	0.29944235	9.06742380	2.71517069		61.00000000	0.56295082	5.10451366	1.284325
62	0.30926874	9.07211490	2.80572154		62.00000000	0.55387097	5.02478106	1.305666
63	0.31940699	9.05985830	2.89378207		63.00000000	0.54507937	4.93834181	1.327054
64	0.32923111	9.06858540	2.98566044		64.00000000	0.53656250	4.86586285	1.348535
65	0.33937830	9.06055450	3.07495558		65.00000000	0.52830769	4.78676064	1.369917
66	0.34919873	9.05419250	3.16171252		66.00000000	0.52030303	4.71092379	1.391260
67	0.35937044	9.06972310	3.25939038		67.00000000	0.51253731	4.64857151	1.412628
68	0.36949825	9.05447960	3.34561437		68.00000000	0.50500000	4.57251220	1.434108
69	0.37934622	9.07855510	3.44391556		69.00000000	0.49768116	4.51822583	1.455482
70	0.38949710	9.06365010	3.53026543		70.00000000	0.49057143	4.44636778	1.476831
71	0.39928478	9.06778430	3.62062826		71.00000000	0.48366197	4.38574243	1.498205
72	0.40946469	9.06018920	3.70982756		72.00000000	0.47694444	4.32120690	1.519675
73	0.41927397	9.06228160	3.79957878		73.00000000	0.47041096	4.26299658	1.541053
74	0.42939731	9.06193160	3.89116905		74.00000000	0.46405405	4.20522610	1.562418
75	0.43920508	9.05544950	3.97719942		75.00000000	0.45786667	4.14618848	1.583795
76	0.44937608	9.06289960	4.07265030		76.00000000	0.45184211	4.09499964	1.605268
77	0.45952770	9.05562780	4.16131181		77.00000000	0.44597403	4.03857479	1.626665
78	0.46936896	9.04601000	4.24591631		78.00000000	0.44025641	3.98256389	1.648007
79	0.47951910	9.04764560	4.33851888		79.00000000	0.43468354	3.93286266	1.669385
80	0.48933509	9.01855750	4.41309665		80.00000000	0.42925000	3.87121581	1.690880
81	0.49946734	9.02923970	4.50981034		81.00000000	0.42395062	3.82795174	1.712257
82	0.50929970	9.00910280	4.58833335		82.00000000	0.41878049	3.77283647	1.733642
83	0.51942009	8.97053530	4.65947625		83.00000000	0.41373494	3.71142388	1.755008
84	0.52922189	8.94704910	4.73497423		84.00000000	0.40880952	3.65763888	1.776476
85	0.53935713	8.89590840	4.79807162		85.00000000	0.40400000	3.59394699	1.797872
86	0.54952824	8.84446620	4.86028394		86.00000000	0.39930233	3.53161592	1.819250
87	0.55935967	8.74607660	4.89220252		87.00000000	0.39471264	3.45218702	1.880931
88	0.56947839	8.60509490	4.90041559		88.00000000	0.39022727	3.35794271	1.902337
89	0.57931131	8.42448810	4.88040124		89.00000000	0.38584270	3.25052721	1.923696
90	0.58944792	8.16882990	4.81509979		90.00000000	0.38155556	3.11686243	1.945177
91	0.59924066	7.81846330	4.68514111		91.00000000	0.37736264	2.95039593	1.966551
92	0.60935193	7.35407020	4.48121687		92.00000000	0.37326087	2.74498664	1.988046
93	0.61918038	6.71430970	4.15736883		93.00000000	0.36924731	2.47924081	2.009555
94	0.62927902	5.89831730	3.71168733		94.00000000	0.36531915	2.15476826	2.030952
95	0.63939846	4.80812310	3.07430651		95.00000000	0.36147368	1.73800997	2.052301
96	0.64917630	3.50396200	2.27468909		96.00000000	0.35770833	1.25339641	2.073672
97	0.65926898	1.81835350	1.19878406		97.00000000	0.35402062	0.64373463	2.095195
98	0.66904539	-0.12992062	-0.08692279		98.00000000	0.35040816	-0.04552525	2.116578
99	0.67911047	-2.51600840	-1.70864765		99.00000000	0.34686869	-0.87272453	2.137931
100	0.68884295	-5.22986130	-3.60255309		100.00000000	0.34340000	-1.79593437	2.159326
101	0.69908226	-8.45861150	-5.91326524		101.00000000	0.34000000	-2.87592791	2.180812
10:03 04/04/2018
Test Lot:	JK-PERC
Recipe:	Recipe_YJX-LID
Cell Name:	3-8-11h
Test Order:	4
Test Condition:	Light
1	-0.29994139	9.07750320	-2.72271893		1.00000000	34.34000000	311.72145989	0.000000
2	-0.29009926	9.07435420	-2.63246344		2.00000000	17.17000000	155.80666161	0.061742
3	-0.27999365	9.07301520	-2.54038664		3.00000000	11.44666667	103.85578066	0.083230
4	-0.27013588	9.07254980	-2.45082122		4.00000000	8.58500000	77.88784003	0.104716
5	-0.26000422	9.06803230	-2.35772667		5.00000000	6.86800000	62.27924584	0.126086
6	-0.24982417	9.07659050	-2.26755169		6.00000000	5.72333333	51.94835296	0.147462
7	-0.23998649	9.07465460	-2.17779451		7.00000000	4.90571429	44.51766271	0.168999
8	-0.22986525	9.06408210	-2.08351750		8.00000000	4.29250000	38.90757241	0.190414
9	-0.22001120	9.07209780	-1.99596312		9.00000000	3.81555556	34.61509316	0.211765
10	-0.20988624	9.07287500	-1.90427162		10.00000000	3.43400000	31.15625275	0.233147
11	-0.20007609	9.07128810	-1.81494785		11.00000000	3.12181818	28.31891212	0.254624
12	-0.18994965	9.06801510	-1.72246629		12.00000000	2.86166667	25.94963654	0.275998
13	-0.18013875	9.07432080	-1.63463681		13.00000000	2.64153846	23.97016741	0.297375
14	-0.16998328	9.07742500	-1.54301048		14.00000000	2.45285714	22.26562675	0.318755
15	-0.16016048	9.07919410	-1.45412809		15.00000000	2.28933333	20.78530169	0.340234
16	-0.15001468	9.07505510	-1.36139149		16.00000000	2.14625000	19.47733701	0.361615
17	-0.13988823	9.06815910	-1.26852873		17.00000000	2.02000000	18.31768138	0.382958
18	-0.13006097	9.06674860	-1.17923012		18.00000000	1.90777778	17.29734150	0.404341
19	-0.11990996	9.06729130	-1.08725854		19.00000000	1.80736842	16.38793596	0.425812
20	-0.11011991	9.07269860	-0.99908475		20.00000000	1.71700000	15.57782350	0.447178
21	-0.09993913	9.07253840	-0.90670159		21.00000000	1.63523810	14.83576041	0.468526
22	-0.09013494	9.07085230	-0.81760074		22.00000000	1.56090909	14.15877582	0.489901
23	-0.07997277	9.06585790	-0.72502173		23.00000000	1.49304348	13.53572001	0.511380
24	-0.07016486	9.07813070	-0.63696576		24.00000000	1.43083333	12.98929201	0.532771
25	-0.05998259	9.05901810	-0.54338334		25.00000000	1.37360000	12.44346726	0.554131
26	-0.04988070	9.08351800	-0.45309219		26.00000000	1.32076923	11.99723108	0.575517
27	-0.04004153	9.05630490	-0.36262826		27.00000000	1.27185185	11.51827816	0.597006
28	-0.02990317	9.06669520	-0.27112289		28.00000000	1.22642857	11.11965404	0.618391
29	-0.02007219	9.08345130	-0.18232472		29.00000000	1.18413793	10.75605923	0.639737
30	-0.00997699	9.06576730	-0.09044909		30.00000000	1.14466667	10.37728164	0.661113
31	-0.00068263	9.05366990	-0.00618028		31.00000000	1.10774194	10.02912982	0.682695
32	0.00946074	9.07846930	0.08588901		32.00000000	1.07312500	9.74233237	0.704095
33	0.01928176	9.07080550	0.17490111		33.00000000	1.04060606	9.43913518	0.725485
34	0.02945853	9.07605930	0.26736740		34.00000000	1.01000000	9.16681989	0.746832
35	0.03927956	9.05799670	0.35579411		35.00000000	0.98114286	8.88718876	0.768309
36	0.04945038	9.07451060	0.44873799		36.00000000	0.95388889	8.65607483	0.789692
37	0.05923121	9.07455060	0.53749665		37.00000000	0.92810811	8.42216399	0.811075
38	0.06941171	9.06557370	0.62925697		38.00000000	0.90368421	8.19241581	0.832490
39	0.07955127	9.07416730	0.72186149		39.00000000	0.88051282	7.98992064	0.853967
40	0.08934922	9.08160690	0.81143447		40.00000000	0.85850000	7.79655952	0.875339
41	0.09949324	9.05504610	0.90091590		41.00000000	0.83756098	7.58415325	0.896751
42	0.10930236	9.07649710	0.99208255		42.00000000	0.81761905	7.42111691	0.918104
43	0.11948732	9.06788350	1.08349710		43.00000000	0.79860465	7.24165394	0.939600
44	0.12929495	9.06734470	1.17236188		44.00000000	0.78045455	7.07665039	0.960979
45	0.13946874	9.06734750	1.26461153		45.00000000	0.76311111	6.91939363	0.982343
46	0.14926818	9.06792160	1.35355215		46.00000000	0.74652174	6.76940060	1.003720
47	0.15938988	9.07098100	1.44582257		47.00000000	0.73063830	6.62760612	1.025208
48	0.16955623	9.06758310	1.53746521		48.00000000	0.71541667	6.48710008	1.046583
49	0.17940181	9.07696060	1.62842316		49.00000000	0.70081633	6.36128218	1.067970
50	0.18952352	9.06673910	1.71836031		50.00000000	0.68680000	6.22703641	1.089317
51	0.19927831	9.07226280	1.80790520		51.00000000	0.67333333	6.10865695	1.110775
52	0.20945211	9.06551070	1.89879034		52.00000000	0.66038462	5.98672380	1.132157
53	0.21925972	9.07064720	1.98882757		53.00000000	0.64792453	5.87709481	1.153535
54	0.22941343	9.07536220	2.08200997		54.00000000	0.63592593	5.77125811	1.175013
55	0.23923297	9.07510660	2.17106470		55.00000000	0.62436364	5.66616656	1.196401
56	0.24938071	9.05929850	2.25921429		56.00000000	0.61321429	5.55529126	1.217746
57	0.25952175	9.07261660	2.35454134		57.00000000	0.60245614	5.46585358	1.239124
58	0.26935172	9.07596780	2.44462754		58.00000000	0.59206897	5.37359887	1.260612
59	0.27950692	9.07362940	2.53614221		59.00000000	0.58203390	5.28115989	1.281982
60	0.28933015	9.06508350	2.62280197		60.00000000	0.57233333	5.18824946	1.303349
61	0.29945782	9.05468750	2.71149698		61.00000000	0.56295082	5.09734375	1.324729
62	0.30928481	9.08078100	2.80854763		62.00000000	0.55387097	5.02958096	1.346208
63	0.31943181	9.06266690	2.89490409		63.00000000	0.54507937	4.93987272	1.367590
64	0.32926100	9.06781200	2.98567685		64.00000000	0.53656250	4.86544788	1.388938
65	0.33940578	9.05940060	3.07481293		65.00000000	0.52830769	4.78615102	1.410320
66	0.34922308	9.07402040	3.16885735		66.00000000	0.52030303	4.72124031	1.431807
67	0.35939911	9.05461880	3.25422194		67.00000000	0.51253731	4.64082999	1.453185
68	0.36952454	9.08371160	3.35665435		68.00000000	0.50500000	4.58727436	1.474522
69	0.37936416	9.05076220	3.43353480		69.00000000	0.49768116	4.50439383	1.495898
70	0.38951936	9.07726100	3.53576890		70.00000000	0.49057143	4.45304490	1.517385
71	0.39932325	9.05653480	3.61648491		71.00000000	0.48366197	4.38030148	1.538764
72	0.40948662	9.06779480	3.71314064		72.00000000	0.47694444	4.32483435	1.560119
73	0.41929650	9.06413170	3.80055870		73.00000000	0.47041096	4.26386688	1.581485
74	0.42945987	9.04926010	3.88629407		74.00000000	0.46405405	4.19934584	1.602957
75	0.43927345	9.06796170	3.98331482		75.00000000	0.45786667	4.15191740	1.624327
76	0.44941896	9.04953580	4.06703297		76.00000000	0.45184211	4.08896131	1.645679
77	0.45957491	9.06669240	4.16682434		77.00000000	0.44597403	4.04350931	1.667041
78	0.46942794	9.04356770	4.24530336		78.00000000	0.44025641	3.98148865	1.688533
79	0.47957122	9.04103280	4.33581913		79.00000000	0.43468354	3.92998818	1.709901
80	0.48936990	9.03606130	4.42197641		80.00000000	0.42925000	3.87872931	1.731291
81	0.49951616	9.01533320	4.50330462		81.00000000	0.42395062	3.82205608	1.752637
82	0.50932378	9.00641160	4.58717960		82.00000000	0.41878049	3.77170944	1.774110
83	0.51945519	8.98040290	4.66491689		83.00000000	0.41373494	3.71550645	1.795584
84	0.52926058	8.94610880	4.73482273		84.00000000	0.40880952	3.65725448	1.816977
85	0.53939492	8.90842060	4.80515682		85.00000000	0.40400000	3.59900192	1.838463
86	0.54952627	8.82209680	4.84797395		86.00000000	0.39930233	3.52268377	1.859853
87	0.55934137	8.74484350	4.89135274		87.00000000	0.39471264	3.45170030	1.881211
88	0.56946379	8.60206700	4.89856568		88.00000000	0.39022727	3.35676115	1.902594
89	0.57927960	8.43842980	4.88821024		89.00000000	0.38584270	3.25590651	1.924087
90	0.58940059	8.16556550	4.81278912		90.00000000	0.38155556	3.11561688	1.945473
91	0.59921712	7.82797050	4.69065394		91.00000000	0.37736264	2.95398359	1.966833
92	0.60932320	7.33778670	4.47108367		92.00000000	0.37326087	2.73890864	1.988315
93	0.61913085	6.72066310	4.16096986		93.00000000	0.36924731	2.48158678	2.009824
94	0.62923616	5.89204740	3.70748928		94.00000000	0.36531915	2.15247774	2.031236
95	0.63934445	4.80679510	3.07319777		95.00000000	0.36147368	1.73752993	2.052598
96	0.64914465	3.50807430	2.27724766		96.00000000	0.35770833	1.25486741	2.073966
97	0.65927082	1.81319070	1.19538372		97.00000000	0.35402062	0.64190689	2.095495
98	0.66896158	-0.14054812	-0.09402129		98.00000000	0.35040816	-0.04924921	2.116887
99	0.67906839	-2.52770540	-1.71648484		99.00000000	0.34686869	-0.87678185	2.138234
100	0.68886340	-5.24114940	-3.61043600		100.00000000	0.34340000	-1.79981070	2.159612
101	0.69908780	-8.50390630	-5.94497715		101.00000000	0.34000000	-2.89132814	2.181090
