# Supplementary material for: Study on the Electrical Injection Regeneration of Industrialized B-Doped Czochralski Silicon PERC Solar Cells
Source: Hindawi journal article supplement (doi:10.1155/2019/5357370), 2019-06-20
Supplement: f1 [file 5357370.f1.zip › section3.3/IVRawData_3-8-12h.csv]

11:04 04/04/2018
Test Lot:	JK-PERC
Recipe:	Recipe_YJX-LID
Cell Name:	3-8-12h
Test Order:	2
Test Condition:	Light
1	-0.29990333	9.08106800	-2.72344253		1.00000000	34.34000000	311.84387512	0.000000
2	-0.29010493	9.08303930	-2.63503448		2.00000000	17.17000000	155.95578478	0.061796
3	-0.27994925	9.09093090	-2.54499929		3.00000000	11.44666667	104.06085570	0.083232
4	-0.27014115	9.08021550	-2.45293986		4.00000000	8.58500000	77.95365007	0.104736
5	-0.25999439	9.08153720	-2.36114872		5.00000000	6.86800000	62.37199749	0.126124
6	-0.24983053	9.08716960	-2.27025240		6.00000000	5.72333333	52.00890068	0.147481
7	-0.24000978	9.07855990	-2.17894316		7.00000000	4.90571429	44.53682100	0.168866
8	-0.22993746	9.07574750	-2.08685433		8.00000000	4.29250000	38.95764614	0.190361
9	-0.22006908	9.08840940	-2.00007790		9.00000000	3.81555556	34.67733098	0.211808
10	-0.20994021	9.08736800	-1.90780395		10.00000000	3.43400000	31.20602171	0.233174
11	-0.20008893	9.08218960	-1.81724560		11.00000000	3.12181818	28.35294462	0.254568
12	-0.18995783	9.08617500	-1.72599009		12.00000000	2.86166667	26.00160413	0.276064
13	-0.18016610	9.07896520	-1.63572175		13.00000000	2.64153846	23.98243577	0.297452
14	-0.17006253	9.09015850	-1.54589535		14.00000000	2.45285714	22.29686021	0.318794
15	-0.16021201	9.08081150	-1.45485506		15.00000000	2.28933333	20.78900446	0.340175
16	-0.15004590	9.08005520	-1.36242505		16.00000000	2.14625000	19.48806847	0.361648
17	-0.13991256	9.08650400	-1.27131604		17.00000000	2.02000000	18.35473808	0.383032
18	-0.13010670	9.08377840	-1.18186043		18.00000000	1.90777778	17.32983057	0.404386
19	-0.11994135	9.08048440	-1.08912556		19.00000000	1.80736842	16.41178075	0.425770
20	-0.11015483	9.07864860	-1.00005699		20.00000000	1.71700000	15.58803965	0.447252
21	-0.09997460	9.07448100	-0.90721756		21.00000000	1.63523810	14.83893703	0.468637
22	-0.09015831	9.07299900	-0.81800629		22.00000000	1.56090909	14.16212662	0.490031
23	-0.08001306	9.08607290	-0.72700449		23.00000000	1.49304348	13.56590189	0.511394
24	-0.07013872	9.07384870	-0.63642809		24.00000000	1.43083333	12.98316518	0.532878
25	-0.06003961	9.08451270	-0.54543060		25.00000000	1.37360000	12.47848664	0.554266
26	-0.04987351	9.07487200	-0.45259574		26.00000000	1.32076923	11.98581171	0.575655
27	-0.04005500	9.08119200	-0.36374711		27.00000000	1.27185185	11.54993086	0.597021
28	-0.02988890	9.07373050	-0.27120384		28.00000000	1.22642857	11.12828233	0.618502
29	-0.02006741	9.07339290	-0.18207947		29.00000000	1.18413793	10.74414870	0.639916
30	-0.00991471	9.08642390	-0.09008924		30.00000000	1.14466667	10.40092656	0.661311
31	-0.00066854	9.07764340	-0.00606878		31.00000000	1.10774194	10.05568627	0.682917
32	0.00950628	9.08891680	0.08640176		32.00000000	1.07312500	9.75354384	0.704311
33	0.01930442	9.09065720	0.17548986		33.00000000	1.04060606	9.45979298	0.725681
34	0.02944492	9.08174900	0.26741137		34.00000000	1.01000000	9.17256649	0.747081
35	0.03923860	9.08716490	0.35656761		35.00000000	0.98114286	8.91580693	0.768556
36	0.04943715	9.07333950	0.44856005		36.00000000	0.95388889	8.65495773	0.789945
37	0.05925018	9.08022690	0.53800504		37.00000000	0.92810811	8.42743221	0.811299
38	0.06941152	9.07880690	0.63017375		38.00000000	0.90368421	8.20437445	0.832676
39	0.07950290	9.08751490	0.72248374		39.00000000	0.88051282	8.00167338	0.854171
40	0.08934718	9.08344940	0.81158062		40.00000000	0.85850000	7.79814131	0.875550
41	0.09947726	9.08147720	0.90340048		41.00000000	0.83756098	7.60629090	0.896919
42	0.10929401	9.07946970	0.99233165		42.00000000	0.81761905	7.42354737	0.918304
43	0.11944642	9.07859330	1.08440547		43.00000000	0.79860465	7.25020684	0.939786
44	0.12926243	9.07540420	1.17310880		44.00000000	0.78045455	7.08294046	0.961192
45	0.13940218	9.08032230	1.26581672		45.00000000	0.76311111	6.92929484	0.982552
46	0.14922711	9.08290860	1.35541620		46.00000000	0.74652174	6.78058872	1.003936
47	0.15937878	9.08069420	1.44726996		47.00000000	0.73063830	6.63470295	1.025418
48	0.16951780	9.06836320	1.53724898		48.00000000	0.71541667	6.48765817	1.046796
49	0.17935315	9.08053590	1.62862272		49.00000000	0.70081633	6.36378781	1.068153
50	0.18948397	9.08325580	1.72113137		50.00000000	0.68680000	6.23838008	1.089544
51	0.19927542	9.08457950	1.81033340		51.00000000	0.67333333	6.11695020	1.111035
52	0.20944494	9.07805440	1.90135256		52.00000000	0.66038462	5.99500746	1.132417
53	0.21926914	9.07096000	1.98898160		53.00000000	0.64792453	5.87729748	1.153805
54	0.22938210	9.08722780	2.08444740		54.00000000	0.63592593	5.77880375	1.175178
55	0.23923829	9.07651040	2.17144883		55.00000000	0.62436364	5.66704304	1.196658
56	0.24935870	9.08323570	2.26498385		56.00000000	0.61321429	5.56996989	1.218057
57	0.25953045	9.07940100	2.35638103		57.00000000	0.60245614	5.46994088	1.239451
58	0.26933679	9.08145520	2.44596999		58.00000000	0.59206897	5.37684779	1.260817
59	0.27952641	9.07530020	2.53678608		59.00000000	0.58203390	5.28213235	1.282302
60	0.28934240	9.07520010	2.62584018		60.00000000	0.57233333	5.19403952	1.303679
61	0.29948142	9.07699580	2.71839159		61.00000000	0.56295082	5.10990223	1.325074
62	0.30928999	9.08117490	2.80871649		62.00000000	0.55387097	5.02979913	1.346561
63	0.31945133	9.07833290	2.90008552		63.00000000	0.54507937	4.94841193	1.367943
64	0.32927850	9.08827590	2.99257386		64.00000000	0.53656250	4.87642804	1.389309
65	0.33941528	9.07799430	3.08120998		65.00000000	0.52830769	4.79597422	1.410692
66	0.34921417	9.07242870	3.16822066		66.00000000	0.52030303	4.72041214	1.432179
67	0.35937178	9.07673260	3.26192155		67.00000000	0.51253731	4.65216414	1.453587
68	0.36952120	9.08278370	3.35628113		68.00000000	0.50500000	4.58680577	1.474938
69	0.37936476	9.07236000	3.44173367		69.00000000	0.49768116	4.51514264	1.496328
70	0.38948515	9.06592660	3.53104378		70.00000000	0.49057143	4.44748456	1.517818
71	0.39934433	9.08683400	3.62877564		71.00000000	0.48366197	4.39495605	1.539205
72	0.40948260	9.07416060	3.71571088		72.00000000	0.47694444	4.32787049	1.560581
73	0.41924578	9.07041740	3.80273422		73.00000000	0.47041096	4.26682375	1.581962
74	0.42944357	9.06592660	3.89330388		74.00000000	0.46405405	4.20707999	1.603463
75	0.43926033	9.07595160	3.98670549		75.00000000	0.45786667	4.15557571	1.624855
76	0.44941050	9.06172750	4.07243549		76.00000000	0.45184211	4.09447003	1.646213
77	0.45954058	9.06732180	4.16680232		77.00000000	0.44597403	4.04379001	1.667594
78	0.46941167	9.05909440	4.25244463		78.00000000	0.44025641	3.98832438	1.689090
79	0.47953951	9.04996010	4.33981343		79.00000000	0.43468354	3.93386873	1.710470
80	0.48937708	9.04448510	4.42616371		80.00000000	0.42925000	3.88234523	1.731828
81	0.49944317	9.03381440	4.51187690		81.00000000	0.42395062	3.82989119	1.753222
82	0.50931948	9.02404310	4.59612094		82.00000000	0.41878049	3.77909317	1.774697
83	0.51945847	8.98994260	4.66990183		83.00000000	0.41373494	3.71945336	1.796135
84	0.52925736	8.97272680	4.74888170		84.00000000	0.40880952	3.66813617	1.817496
85	0.53935170	8.90121560	4.80088577		85.00000000	0.40400000	3.59609110	1.838858
86	0.54954135	8.84449100	4.86041352		86.00000000	0.39930233	3.53162582	1.860337
87	0.55933499	8.74331860	4.89044402		87.00000000	0.39471264	3.45109840	1.881719
88	0.56947404	8.62477870	4.91158757		88.00000000	0.39022727	3.36562387	1.903109
89	0.57930565	8.44381520	4.89154985		89.00000000	0.38584270	3.25798443	1.924482
90	0.58942235	8.18729780	4.82577631		90.00000000	0.38155556	3.12390896	1.945964
91	0.59923238	7.83433770	4.69458883		91.00000000	0.37736264	2.95638634	1.967350
92	0.60934609	7.37365820	4.49310979		92.00000000	0.37326087	2.75229807	1.988846
93	0.61913902	6.74748560	4.17763162		93.00000000	0.36924731	2.49149092	2.010356
94	0.62923193	5.90657000	3.71660244		94.00000000	0.36531915	2.15778313	2.031743
95	0.63935155	4.83113810	3.08879563		95.00000000	0.36147368	1.74632929	2.053114
96	0.64913708	3.51728300	2.28319882		96.00000000	0.35770833	1.25816144	2.074499
97	0.65925449	1.82136240	1.20074134		97.00000000	0.35402062	0.64479984	2.095979
98	0.66897821	-0.14081164	-0.09419992		98.00000000	0.35040816	-0.04934155	2.117372
99	0.67902416	-2.55374380	-1.73405374		99.00000000	0.34686869	-0.88581376	2.138722
100	0.68878955	-5.30411910	-3.65342181		100.00000000	0.34340000	-1.82143450	2.160117
101	0.69904840	-8.59638400	-6.00928848		101.00000000	0.34000000	-2.92277056	2.181599
11:05 04/04/2018
Test Lot:	JK-PERC
Recipe:	Recipe_YJX-LID
Cell Name:	3-8-12h
Test Order:	3
Test Condition:	Light
1	-0.29995239	9.07508560	-2.72209362		1.00000000	34.34000000	311.63843950	0.000000
2	-0.29011080	9.08091070	-2.63447027		2.00000000	17.17000000	155.91923672	0.061849
3	-0.27998120	9.07660100	-2.54127764		3.00000000	11.44666667	103.89682611	0.083279
4	-0.27016565	9.06953530	-2.45027690		4.00000000	8.58500000	77.86196055	0.104769
5	-0.26002485	9.09281250	-2.36435721		5.00000000	6.86800000	62.44943625	0.126171
6	-0.24984984	9.06690690	-2.26536524		6.00000000	5.72333333	51.89293049	0.147527
7	-0.24001867	9.08681680	-2.18100568		7.00000000	4.90571429	44.57732699	0.168897
8	-0.22985406	9.08291820	-2.08774562		8.00000000	4.29250000	38.98842637	0.190387
9	-0.22003555	9.07805350	-1.99749449		9.00000000	3.81555556	34.63781747	0.211757
10	-0.20989996	9.07297520	-1.90441713		10.00000000	3.43400000	31.15659684	0.233101
11	-0.20007773	9.09611030	-1.81992910		11.00000000	3.12181818	28.39640252	0.254475
12	-0.18991685	9.07654480	-1.72378880		12.00000000	2.86166667	25.97404570	0.275952
13	-0.18014671	9.08866020	-1.63729223		13.00000000	2.64153846	24.00804548	0.297319
14	-0.16998434	9.07149980	-1.54201291		14.00000000	2.45285714	22.25109308	0.318682
15	-0.16016805	9.09172820	-1.45620438		15.00000000	2.28933333	20.81399643	0.340049
16	-0.15003918	9.07589050	-1.36173917		16.00000000	2.14625000	19.47912999	0.361530
17	-0.13992742	9.07909490	-1.27041433		17.00000000	2.02000000	18.33977170	0.382955
18	-0.13008583	9.07357880	-1.18034403		18.00000000	1.90777778	17.31037200	0.404330
19	-0.11992792	9.08394430	-1.08941855		19.00000000	1.80736842	16.41803407	0.425703
20	-0.11011238	9.07944010	-0.99975876		20.00000000	1.71700000	15.58939865	0.447196
21	-0.09993736	9.07670310	-0.90710178		21.00000000	1.63523810	14.84257069	0.468581
22	-0.09014043	9.06764600	-0.81736153		22.00000000	1.56090909	14.15377107	0.489960
23	-0.07999443	9.08989910	-0.72714132		23.00000000	1.49304348	13.57161457	0.511304
24	-0.07015657	9.07499410	-0.63667043		24.00000000	1.43083333	12.98480406	0.532788
25	-0.06001727	9.07597540	-0.54471526		25.00000000	1.37360000	12.46675981	0.554189
26	-0.04986457	9.10092540	-0.45381375		26.00000000	1.32076923	12.02022224	0.575575
27	-0.04006541	9.05468370	-0.36277960		27.00000000	1.27185185	11.51621623	0.597048
28	-0.02991122	9.09431650	-0.27202212		28.00000000	1.22642857	11.15352959	0.618449
29	-0.02008750	9.07852360	-0.18236482		29.00000000	1.18413793	10.75022415	0.639795
30	-0.00994894	9.07917980	-0.09032824		30.00000000	1.14466667	10.39263448	0.661168
31	-0.00068417	9.07800010	-0.00621090		31.00000000	1.10774194	10.05608140	0.682781
32	0.00947948	9.08414940	0.08611304		32.00000000	1.07312500	9.74842782	0.704155
33	0.01930665	9.07504940	0.17520879		33.00000000	1.04060606	9.44355141	0.725513
34	0.02946873	9.08756730	0.26779907		34.00000000	1.01000000	9.17844297	0.746898
35	0.03928697	9.06931020	0.35630569		35.00000000	0.98114286	8.89828892	0.768381
36	0.04942226	9.07582380	0.44854770		36.00000000	0.95388889	8.65732748	0.789778
37	0.05926431	9.08308120	0.53830250		37.00000000	0.92810811	8.43008131	0.811135
38	0.06941820	9.06211850	0.62907595		38.00000000	0.90368421	8.18929340	0.832505
39	0.07953265	9.08997250	0.72294963		39.00000000	0.88051282	8.00383732	0.853994
40	0.08936652	9.07368280	0.81088344		40.00000000	0.85850000	7.78975668	0.875382
41	0.09951744	9.07530980	0.90315155		41.00000000	0.83756098	7.60112533	0.896729
42	0.10931706	9.07403470	0.99194680		42.00000000	0.81761905	7.41910361	0.918114
43	0.11943970	9.07812020	1.08428795		43.00000000	0.79860465	7.24982902	0.939604
44	0.12928621	9.07755090	1.17360215		44.00000000	0.78045455	7.08461586	0.960980
45	0.13946617	9.07887940	1.26619654		45.00000000	0.76311111	6.92819375	0.982339
46	0.14924644	9.08194160	1.35544745		46.00000000	0.74652174	6.77986684	1.003715
47	0.15940033	9.07139780	1.44598380		47.00000000	0.73063830	6.62791065	1.025197
48	0.16954902	9.08753780	1.54078313		48.00000000	0.71541667	6.50137600	1.046575
49	0.17933972	9.08000760	1.62840602		49.00000000	0.70081633	6.36341757	1.067948
50	0.18950999	9.07034300	1.71892061		50.00000000	0.68680000	6.22951157	1.089313
51	0.19928059	9.07821180	1.80911140		51.00000000	0.67333333	6.11266261	1.110800
52	0.20946053	9.07809830	1.90150328		52.00000000	0.66038462	5.99503645	1.132182
53	0.21924527	9.08183000	1.99114827		53.00000000	0.64792453	5.88434042	1.153576
54	0.22938280	9.07632920	2.08195381		54.00000000	0.63592593	5.77187305	1.174919
55	0.23922262	9.08699320	2.17381432		55.00000000	0.62436364	5.67358812	1.196402
56	0.24937651	9.07169630	2.26226796		56.00000000	0.61321429	5.56289377	1.217795
57	0.25951478	9.08989240	2.35896143		57.00000000	0.60245614	5.47626149	1.239174
58	0.26935238	9.08473870	2.44699599		58.00000000	0.59206897	5.37879184	1.260673
59	0.27948469	9.07617760	2.53665268		59.00000000	0.58203390	5.28264303	1.282079
60	0.28932673	9.08112720	2.62741284		60.00000000	0.57233333	5.19743180	1.303440
61	0.29946798	9.06903460	2.71588547		61.00000000	0.56295082	5.10542046	1.324833
62	0.30928174	9.08140750	2.80871351		62.00000000	0.55387097	5.02992796	1.346318
63	0.31942001	9.07027440	2.89722714		63.00000000	0.54507937	4.94401941	1.367701
64	0.32925981	9.09253600	2.99380668		64.00000000	0.53656250	4.87871385	1.389061
65	0.33940181	9.06625940	3.07710485		65.00000000	0.52830769	4.78977458	1.410445
66	0.34922376	9.07859040	3.17045947		66.00000000	0.52030303	4.72361810	1.431926
67	0.35936651	9.07555010	3.26144877		67.00000000	0.51253731	4.65155807	1.453324
68	0.36953750	9.07126430	3.35217233		68.00000000	0.50500000	4.58098847	1.474679
69	0.37933937	9.09487530	3.45004427		69.00000000	0.49768116	4.52634808	1.496056
70	0.38951039	9.06801990	3.53208797		70.00000000	0.49057143	4.44851148	1.517536
71	0.39933011	9.08993050	3.62988295		71.00000000	0.48366197	4.39645371	1.538913
72	0.40946987	9.07458020	3.71576717		72.00000000	0.47694444	4.32807061	1.560276
73	0.41931862	9.07613090	3.80579068		73.00000000	0.47041096	4.26951144	1.581671
74	0.42943308	9.07098200	3.89537974		74.00000000	0.46405405	4.20942597	1.603157
75	0.43926543	9.06229210	3.98075164		75.00000000	0.45786667	4.14932148	1.624531
76	0.44943571	9.07316020	4.07780220		76.00000000	0.45184211	4.09963581	1.645884
77	0.45956504	9.06929020	4.16792871		77.00000000	0.44597403	4.04466786	1.667266
78	0.46942720	9.05048850	4.24854548		78.00000000	0.44025641	3.98453558	1.688736
79	0.47958332	9.06122780	4.34561371		79.00000000	0.43468354	3.93876662	1.710108
80	0.48938370	9.04387470	4.42592486		80.00000000	0.42925000	3.88208321	1.731472
81	0.49949518	9.03896520	4.51491955		81.00000000	0.42395062	3.83207488	1.752841
82	0.50932753	9.00644870	4.58723227		82.00000000	0.41878049	3.77172498	1.774323
83	0.51945615	8.98692800	4.66831502		83.00000000	0.41373494	3.71820611	1.795700
84	0.52924085	8.95969200	4.74183501		84.00000000	0.40880952	3.66280742	1.817096
85	0.53939551	8.91296860	4.80761524		85.00000000	0.40400000	3.60083931	1.838443
86	0.54954791	8.83850860	4.85718393		86.00000000	0.39930233	3.52923704	1.859917
87	0.55933565	8.75290680	4.89581281		87.00000000	0.39471264	3.45488298	1.881316
88	0.56949174	8.62049200	4.90929899		88.00000000	0.39022727	3.36395108	1.902705
89	0.57926160	8.43792440	4.88776559		89.00000000	0.38584270	3.25571150	1.924184
90	0.58941996	8.18268200	4.82303610		90.00000000	0.38155556	3.12214778	1.945580
91	0.59923226	7.84546610	4.70125638		91.00000000	0.37736264	2.96058578	1.966936
92	0.60931695	7.35960630	4.48433286		92.00000000	0.37326087	2.74705305	1.988415
93	0.61912251	6.73982100	4.17277489		93.00000000	0.36924731	2.48866079	2.009921
94	0.62921762	5.91533710	3.72203433		94.00000000	0.36531915	2.16098592	2.031359
95	0.63936257	4.83119340	3.08888423		95.00000000	0.36147368	1.74634928	2.052743
96	0.64913690	3.51353500	2.28076522		96.00000000	0.35770833	1.25682075	2.074128
97	0.65925807	1.82164930	1.20093700		97.00000000	0.35402062	0.64490141	2.095620
98	0.66901302	-0.15691371	-0.10497732		98.00000000	0.35040816	-0.05498384	2.116998
99	0.67905527	-2.57643910	-1.74954455		99.00000000	0.34686869	-0.89368605	2.138346
100	0.68879241	-5.34216400	-3.67964202		100.00000000	0.34340000	-1.83449912	2.159720
101	0.69902372	-8.64531990	-6.04328368		101.00000000	0.34000000	-2.93940877	2.181197
11:05 04/04/2018
Test Lot:	JK-PERC
Recipe:	Recipe_YJX-LID
Cell Name:	3-8-12h
Test Order:	4
Test Condition:	Light
1	-0.29991636	9.08308600	-2.72416609		1.00000000	34.34000000	311.91317324	0.000000
2	-0.29008147	9.07570650	-2.63269428		2.00000000	17.17000000	155.82988061	0.061807
3	-0.27993470	9.09759710	-2.54673311		3.00000000	11.44666667	104.13716147	0.083249
4	-0.27013776	9.06426620	-2.44860057		4.00000000	8.58500000	77.81672533	0.104759
5	-0.25998059	9.09846690	-2.36542479		5.00000000	6.86800000	62.48827067	0.126143
6	-0.24981521	9.06148820	-2.26369758		6.00000000	5.72333333	51.86191746	0.147509
7	-0.23996617	9.09937760	-2.18354279		7.00000000	4.90571429	44.63894668	0.168886
8	-0.22984248	9.07907300	-2.08675665		8.00000000	4.29250000	38.97192085	0.190376
9	-0.22002172	9.07577040	-1.99686661		9.00000000	3.81555556	34.62910617	0.211775
10	-0.20988986	9.08310320	-1.90645126		10.00000000	3.43400000	31.19137639	0.233136
11	-0.20003486	9.07763100	-1.81584265		11.00000000	3.12181818	28.33871350	0.254515
12	-0.18991935	9.08102700	-1.72466275		12.00000000	2.86166667	25.98687227	0.275992
13	-0.18011050	9.09115030	-1.63741163		13.00000000	2.64153846	24.01462318	0.297370
14	-0.16998459	9.07610700	-1.54279833		14.00000000	2.45285714	22.26239388	0.318771
15	-0.16015042	9.08347990	-1.45472312		15.00000000	2.28933333	20.79511332	0.340121
16	-0.15003791	9.08059120	-1.36243293		16.00000000	2.14625000	19.48921886	0.361597
17	-0.13987404	9.06517600	-1.26798279		17.00000000	2.02000000	18.31165552	0.382969
18	-0.13004360	9.08434770	-1.18136128		18.00000000	1.90777778	17.33091667	0.404366
19	-0.11991396	9.07850170	-1.08863909		19.00000000	1.80736842	16.40819728	0.425809
20	-0.11010213	9.06776810	-0.99838058		20.00000000	1.71700000	15.56935783	0.447274
21	-0.09993825	9.09056950	-0.90849562		21.00000000	1.63523810	14.86524555	0.468636
22	-0.09011303	9.07701300	-0.81795714		22.00000000	1.56090909	14.16839211	0.490013
23	-0.07999455	9.08477210	-0.72673227		23.00000000	1.49304348	13.56395974	0.511363
24	-0.07014774	9.07565310	-0.63663654		24.00000000	1.43083333	12.98574698	0.532849
25	-0.06001810	9.07851890	-0.54487546		25.00000000	1.37360000	12.47025356	0.554242
26	-0.04986465	9.07859230	-0.45270079		26.00000000	1.32076923	11.99072537	0.575608
27	-0.04004091	9.08815960	-0.36389815		27.00000000	1.27185185	11.55879262	0.596972
28	-0.02989564	9.07989880	-0.27144938		28.00000000	1.22642857	11.13584731	0.618454
29	-0.02006967	9.07671930	-0.18216672		29.00000000	1.18413793	10.74808761	0.639831
30	-0.00991100	9.07990550	-0.08999096		30.00000000	1.14466667	10.39346516	0.661212
31	-0.00068864	9.07814500	-0.00625158		31.00000000	1.10774194	10.05624191	0.682690
32	0.00948768	9.07388110	0.08609008		32.00000000	1.07312500	9.73740866	0.704181
33	0.01930593	9.07573990	0.17521560		33.00000000	1.04060606	9.44426994	0.725561
34	0.02947026	9.09004210	0.26788590		34.00000000	1.01000000	9.18094252	0.746956
35	0.03927809	9.06543160	0.35607284		35.00000000	0.98114286	8.89448346	0.768457
36	0.04944539	9.08803460	0.44936145		36.00000000	0.95388889	8.66897523	0.789827
37	0.05926588	9.06761740	0.53740031		37.00000000	0.92810811	8.41572923	0.811207
38	0.06940639	9.07544330	0.62989376		38.00000000	0.90368421	8.20133481	0.832588
39	0.07953797	9.08436110	0.72255167		39.00000000	0.88051282	7.99889641	0.854070
40	0.08936069	9.07515240	0.81096190		40.00000000	0.85850000	7.79101834	0.875442
41	0.09954735	9.08184150	0.90407325		41.00000000	0.83756098	7.60659603	0.896787
42	0.10935890	9.08928300	0.99399399		42.00000000	0.81761905	7.43157091	0.918174
43	0.11947931	9.06462670	1.08303534		43.00000000	0.79860465	7.23905304	0.939658
44	0.12932138	9.08272460	1.17459048		44.00000000	0.78045455	7.08865370	0.961033
45	0.13947603	9.07492540	1.26573457		45.00000000	0.76311111	6.92517641	0.982395
46	0.14927866	9.08539770	1.35625599		46.00000000	0.74652174	6.78244689	1.003782
47	0.15943927	9.07556820	1.44700197		47.00000000	0.73063830	6.63095770	1.025273
48	0.16956861	9.07146450	1.53823563		48.00000000	0.71541667	6.48987689	1.046652
49	0.17939207	9.07518100	1.62801551		49.00000000	0.70081633	6.36003501	1.068006
50	0.18952589	9.07306960	1.71958159		50.00000000	0.68680000	6.23138420	1.089381
51	0.19929576	9.08713150	1.81102678		51.00000000	0.67333333	6.11866854	1.110878
52	0.20944521	9.06350900	1.89830855		52.00000000	0.66038462	5.98540191	1.132262
53	0.21927759	9.09194280	1.99365931		53.00000000	0.64792453	5.89089275	1.153612
54	0.22942331	9.06246760	2.07914131		54.00000000	0.63592593	5.76305810	1.174989
55	0.23927060	9.08814620	2.17452619		55.00000000	0.62436364	5.67430801	1.196473
56	0.24938282	9.07873540	2.26408064		56.00000000	0.61321429	5.56721024	1.217863
57	0.25953749	9.07925990	2.35640833		57.00000000	0.60245614	5.46985588	1.239244
58	0.26937807	9.08142950	2.44633795		58.00000000	0.59206897	5.37683257	1.260610
59	0.27949849	9.07221700	2.53567095		59.00000000	0.58203390	5.28033783	1.282080
60	0.28934276	9.07551290	2.62593395		60.00000000	0.57233333	5.19421855	1.303462
61	0.29949147	9.08101180	2.71968557		61.00000000	0.56295082	5.11216304	1.324848
62	0.30927026	9.07282260	2.80595420		62.00000000	0.55387097	5.02517303	1.346233
63	0.31943834	9.09351350	2.90481686		63.00000000	0.54507937	4.95668656	1.367706
64	0.32924542	9.07033440	2.98636606		64.00000000	0.53656250	4.86680130	1.389081
65	0.33940601	9.07251260	3.07926530		65.00000000	0.52830769	4.79307820	1.410474
66	0.34924808	9.07724670	3.17021098		66.00000000	0.52030303	4.72291896	1.431960
67	0.35939902	9.06563660	3.25818091		67.00000000	0.51253731	4.64647703	1.453342
68	0.36956185	9.08081340	3.35592220		68.00000000	0.50500000	4.58581077	1.474704
69	0.37941360	9.08346370	3.44638966		69.00000000	0.49768116	4.52066875	1.496124
70	0.38953850	9.06930640	3.53284401		70.00000000	0.49057143	4.44914260	1.517621
71	0.39936939	9.06313320	3.61953798		71.00000000	0.48366197	4.38349287	1.538998
72	0.40951660	9.07900430	3.71800297		72.00000000	0.47694444	4.33018066	1.560370
73	0.41931921	9.07630250	3.80586799		73.00000000	0.47041096	4.26959216	1.581765
74	0.42947388	9.06540300	3.89335380		74.00000000	0.46405405	4.20683701	1.603269
75	0.43927202	9.07519910	3.98648104		75.00000000	0.45786667	4.15523116	1.624649
76	0.44945720	9.06335540	4.07359034		76.00000000	0.45184211	4.09520558	1.646004
77	0.45958135	9.06256100	4.16498402		77.00000000	0.44597403	4.04166681	1.667386
78	0.46947923	9.06135460	4.25411778		78.00000000	0.44025641	3.98931945	1.688862
79	0.47957212	9.05668160	4.34333200		79.00000000	0.43468354	3.93679046	1.710261
80	0.48942086	9.04994960	4.42923412		80.00000000	0.42925000	3.88469087	1.731623
81	0.49953830	9.02655320	4.50910904		81.00000000	0.42395062	3.82681280	1.752991
82	0.50935209	9.02583600	4.59732843		82.00000000	0.41878049	3.77984400	1.774485
83	0.51947844	8.98575970	4.66790843		83.00000000	0.41373494	3.71772275	1.795861
84	0.52924240	8.96409130	4.74417719		84.00000000	0.40880952	3.66460590	1.817226
85	0.53937399	8.91306400	4.80747489		85.00000000	0.40400000	3.60087786	1.838604
86	0.54956061	8.84158800	4.85898849		86.00000000	0.39930233	3.53046665	1.860099
87	0.55936098	8.75950150	4.89972334		87.00000000	0.39471264	3.45748599	1.881487
88	0.56949037	8.62180810	4.91003668		88.00000000	0.39022727	3.36446466	1.902884
89	0.57926023	8.44764040	4.89338212		89.00000000	0.38584270	3.25946035	1.924250
90	0.58943570	8.18478010	4.82440159		90.00000000	0.38155556	3.12294832	1.945717
91	0.59923613	7.85644480	4.70786558		91.00000000	0.37736264	2.96472873	1.967097
92	0.60935134	7.37723350	4.49532712		92.00000000	0.37326087	2.75363259	1.988574
93	0.61913830	6.76531510	4.18866569		93.00000000	0.36924731	2.49807441	2.009996
94	0.62928033	5.94185920	3.73909512		94.00000000	0.36531915	2.17067495	2.031501
95	0.63937694	4.84311200	3.09657413		95.00000000	0.36147368	1.75065754	2.052873
96	0.64914602	3.54332640	2.30013623		96.00000000	0.35770833	1.26747738	2.074315
97	0.65926647	1.81648250	1.19754601		97.00000000	0.35402062	0.64307226	2.095819
98	0.66901106	-0.16234605	-0.10861130		98.00000000	0.35040816	-0.05688738	2.117220
99	0.67909795	-2.60934040	-1.77199772		99.00000000	0.34686869	-0.90509848	2.138569
100	0.68881124	-5.40775780	-3.72492436		100.00000000	0.34340000	-1.85702403	2.159940
101	0.69908726	-8.78542710	-6.14178016		101.00000000	0.34000000	-2.98704521	2.181433
11:34 04/04/2018
Test Lot:	JK-PERC
Recipe:	Recipe_YJX-LID
Cell Name:	3-8-12h
Test Order:	5
Test Condition:	Light
1	-0.29990149	9.08263400	-2.72389547		1.00000000	34.34000000	311.89765156	0.000000
2	-0.29007930	9.08620360	-2.63571958		2.00000000	17.17000000	156.01011581	0.061814
3	-0.27997872	9.09081650	-2.54523517		3.00000000	11.44666667	104.05954620	0.083246
4	-0.27016917	9.09852700	-2.45814149		4.00000000	8.58500000	78.11085430	0.104742
5	-0.25997558	9.09750180	-2.36512831		5.00000000	6.86800000	62.48164236	0.126131
6	-0.24985045	9.09344670	-2.27200175		6.00000000	5.72333333	52.04482661	0.147472
7	-0.24004239	9.09203340	-2.18247343		7.00000000	4.90571429	44.60291814	0.168857
8	-0.22990164	9.09560970	-2.09109559		8.00000000	4.29250000	39.04290464	0.190344
9	-0.22007646	9.10017200	-2.00273364		9.00000000	3.81555556	34.72221183	0.211713
10	-0.20991710	9.07586480	-1.90517922		10.00000000	3.43400000	31.16651972	0.233095
11	-0.20008746	9.10588650	-1.82197370		11.00000000	3.12181818	28.42692204	0.254455
12	-0.18995935	9.08659550	-1.72608377		12.00000000	2.86166667	26.00280746	0.275927
13	-0.18018107	9.09267230	-1.63832742		13.00000000	2.64153846	24.01864360	0.297315
14	-0.16999640	9.09165100	-1.54554794		14.00000000	2.45285714	22.30052110	0.318701
15	-0.16023150	9.09374520	-1.45710443		15.00000000	2.28933333	20.81861401	0.340048
16	-0.15001856	9.09688470	-1.36470154		16.00000000	2.14625000	19.52418879	0.361520
17	-0.13987707	9.09139540	-1.27167775		17.00000000	2.02000000	18.36461871	0.382894
18	-0.13006304	9.08520410	-1.18164926		18.00000000	1.90777778	17.33255049	0.404274
19	-0.11993569	9.08694930	-1.08984953		19.00000000	1.80736842	16.42346521	0.425758
20	-0.11010679	9.09288220	-1.00118807		20.00000000	1.71700000	15.61247874	0.447145
21	-0.09994296	9.09443760	-0.90892501		21.00000000	1.63523810	14.87157082	0.468489
22	-0.09010067	9.09935950	-0.81985837		22.00000000	1.56090909	14.20327297	0.489871
23	-0.07995693	9.08471200	-0.72638572		23.00000000	1.49304348	13.56387000	0.511353
24	-0.07014441	9.08967490	-0.63758986		24.00000000	1.43083333	13.00580984	0.532740
25	-0.05999026	9.09803960	-0.54579373		25.00000000	1.37360000	12.49706719	0.554095
26	-0.04980336	9.09951500	-0.45318643		26.00000000	1.32076923	12.01835943	0.575470
27	-0.04007568	9.08318330	-0.36401477		27.00000000	1.27185185	11.55246350	0.596959
28	-0.02988134	9.09504030	-0.27177200		28.00000000	1.22642857	11.15441728	0.618337
29	-0.02003979	9.10045240	-0.18237114		29.00000000	1.18413793	10.77619088	0.639675
30	-0.00992062	9.09733680	-0.09025121		30.00000000	1.14466667	10.41341819	0.661051
31	-0.00064844	9.09092520	-0.00589488		31.00000000	1.10774194	10.07039908	0.682638
32	0.00947871	9.09485820	0.08620755		32.00000000	1.07312500	9.75991971	0.704022
33	0.01929840	9.09332940	0.17548674		33.00000000	1.04060606	9.46257368	0.725405
34	0.02945152	9.09573940	0.26788334		34.00000000	1.01000000	9.18669679	0.746785
35	0.03926228	9.09386540	0.35704589		35.00000000	0.98114286	8.92238108	0.768265
36	0.04942209	9.08854870	0.44917510		36.00000000	0.95388889	8.66946562	0.789656
37	0.05923136	9.08769700	0.53827668		37.00000000	0.92810811	8.43436527	0.811009
38	0.06935545	9.09475520	0.63077085		38.00000000	0.90368421	8.21878667	0.832388
39	0.07954132	9.08733180	0.72281835		39.00000000	0.88051282	8.00151215	0.853865
40	0.08935431	9.08733370	0.81199240		40.00000000	0.85850000	7.80147598	0.875241
41	0.09949180	9.09143920	0.90452362		41.00000000	0.83756098	7.61463469	0.896612
42	0.10928469	9.09165760	0.99357898		42.00000000	0.81761905	7.43351243	0.917975
43	0.11947055	9.08605480	1.08551596		43.00000000	0.79860465	7.25616562	0.939451
44	0.12926270	9.09637360	1.17582181		44.00000000	0.78045455	7.09930612	0.960844
45	0.13941954	9.08621220	1.26679553		45.00000000	0.76311111	6.93378949	0.982243
46	0.14924742	9.08811090	1.35637710		46.00000000	0.74652174	6.78447235	1.003606
47	0.15940128	9.09029100	1.44900402		47.00000000	0.73063830	6.64171474	1.025073
48	0.16955887	9.09321980	1.54183607		48.00000000	0.71541667	6.50544100	1.046446
49	0.17937408	9.08326340	1.62930202		49.00000000	0.70081633	6.36569929	1.067832
50	0.18951306	9.09139540	1.72293816		50.00000000	0.68680000	6.24397036	1.089331
51	0.19929554	9.09052750	1.81170159		51.00000000	0.67333333	6.12095518	1.110721
52	0.20945536	9.09562300	1.90512699		52.00000000	0.66038462	6.00660950	1.132091
53	0.21926239	9.09407710	1.99398908		53.00000000	0.64792453	5.89227562	1.153464
54	0.22944677	9.09151550	2.08601887		54.00000000	0.63592593	5.78153041	1.174925
55	0.23924190	9.08771420	2.17416201		55.00000000	0.62436364	5.67403828	1.196310
56	0.24940170	9.09648420	2.26867862		56.00000000	0.61321429	5.57809406	1.217664
57	0.25953770	9.09505840	2.36051054		57.00000000	0.60245614	5.47937378	1.239048
58	0.26936334	9.08859350	2.44813390		58.00000000	0.59206897	5.38107415	1.260537
59	0.27952391	9.08270260	2.53883254		59.00000000	0.58203390	5.28644080	1.281921
60	0.28929970	9.08611870	2.62861141		60.00000000	0.57233333	5.20028860	1.303272
61	0.29948482	9.08456800	2.72069021		61.00000000	0.56295082	5.11416500	1.324657
62	0.30932012	9.08656410	2.81065710		62.00000000	0.55387097	5.03278405	1.346137
63	0.31943825	9.09379200	2.90490500		63.00000000	0.54507937	4.95683837	1.367520
64	0.32926688	9.08834170	2.99248992		64.00000000	0.53656250	4.87646334	1.388888
65	0.33939320	9.09727480	3.08755321		65.00000000	0.52830769	4.80616026	1.410271
66	0.34923747	9.08375550	3.17238779		66.00000000	0.52030303	4.72630551	1.431746
67	0.35938239	9.08752540	3.26589660		67.00000000	0.51253731	4.65769585	1.453114
68	0.36952582	9.08258060	3.35624804		68.00000000	0.50500000	4.58670320	1.474460
69	0.37933511	9.08929920	3.44789031		69.00000000	0.49768116	4.52357296	1.495848
70	0.38951203	9.08831120	3.54000654		70.00000000	0.49057143	4.45846581	1.517316
71	0.39931759	9.08575630	3.62810231		71.00000000	0.48366197	4.39443481	1.538686
72	0.40944541	9.06867690	3.71312813		72.00000000	0.47694444	4.32525507	1.560056
73	0.41929707	9.08643530	3.80991570		73.00000000	0.47041096	4.27435874	1.581421
74	0.42943382	9.06647590	3.89345138		74.00000000	0.46405405	4.20733490	1.602900
75	0.43923119	9.07789610	3.98729511		75.00000000	0.45786667	4.15646603	1.624292
76	0.44942078	9.07574840	4.07882993		76.00000000	0.45184211	4.10080526	1.645666
77	0.45955157	9.06736370	4.16692122		77.00000000	0.44597403	4.04380869	1.667005
78	0.46940622	9.06338210	4.25440793		78.00000000	0.44025641	3.99021207	1.688479
79	0.47953478	9.05980010	4.34448925		79.00000000	0.43468354	3.93814602	1.709851
80	0.48936340	9.03089520	4.41938958		80.00000000	0.42925000	3.87651176	1.731234
81	0.49948600	9.03864380	4.51467604		81.00000000	0.42395062	3.83193862	1.752718
82	0.50930423	9.00801850	4.58782193		82.00000000	0.41878049	3.77238238	1.774088
83	0.51948112	8.97532560	4.66251220		83.00000000	0.41373494	3.71340580	1.795457
84	0.52920336	8.95817760	4.74069769		84.00000000	0.40880952	3.66218832	1.816832
85	0.53939587	8.88422300	4.79211319		85.00000000	0.40400000	3.58922609	1.838315
86	0.54953337	8.82852460	4.85156888		86.00000000	0.39930233	3.52525040	1.859708
87	0.55931807	8.72006420	4.87728948		87.00000000	0.39471264	3.44191959	1.881054
88	0.56945854	8.57745360	4.88450420		88.00000000	0.39022727	3.34715633	1.902425
89	0.57928270	8.37396140	4.85089097		89.00000000	0.38584270	3.23103185	1.923902
90	0.58936584	8.09950830	4.77357351		90.00000000	0.38155556	3.09041239	1.945268
91	0.59919226	7.73260120	4.63331479		91.00000000	0.37736264	2.91799478	1.966603
92	0.60933048	7.25366160	4.41987710		92.00000000	0.37326087	2.70750804	1.988097
93	0.61912042	6.59181260	4.08112579		93.00000000	0.36924731	2.43400908	2.009600
94	0.62923485	5.76168350	3.62545205		94.00000000	0.36531915	2.10485331	2.030982
95	0.63936043	4.65386770	2.97549885		95.00000000	0.36147368	1.68225070	2.052381
96	0.64914584	3.35399840	2.17723411		96.00000000	0.35770833	1.19975318	2.073769
97	0.65926695	1.72170590	1.13506380		97.00000000	0.35402062	0.60951939	2.095256
98	0.66898620	-0.19401065	-0.12979045		98.00000000	0.35040816	-0.06798292	2.116633
99	0.67906713	-2.51388790	-1.70709864		99.00000000	0.34686869	-0.87198899	2.137974
100	0.68880343	-5.13751410	-3.53873733		100.00000000	0.34340000	-1.76422234	2.159343
101	0.69899750	-8.27415750	-5.78361541		101.00000000	0.34000000	-2.81321355	2.180826
11:34 04/04/2018
Test Lot:	JK-PERC
Recipe:	Recipe_YJX-LID
Cell Name:	3-8-12h
Test Order:	6
Test Condition:	Light
1	-0.29991242	9.09363460	-2.72729396		1.00000000	34.34000000	312.27541216	0.000000
2	-0.29010159	9.09010980	-2.63705531		2.00000000	17.17000000	156.07718527	0.061788
3	-0.27993941	9.10098080	-2.54772320		3.00000000	11.44666667	104.17589356	0.083217
4	-0.27010921	9.08716770	-2.45452769		4.00000000	8.58500000	78.01333470	0.104743
5	-0.25996491	9.09555530	-2.36452521		5.00000000	6.86800000	62.46827380	0.126123
6	-0.24981987	9.09541700	-2.27221589		6.00000000	5.72333333	52.05610330	0.147493
7	-0.23998594	9.09099100	-2.18171002		7.00000000	4.90571429	44.59780442	0.168870
8	-0.22984761	9.08984280	-2.08927864		8.00000000	4.29250000	39.01815022	0.190356
9	-0.21998836	9.09507470	-2.00081057		9.00000000	3.81555556	34.70276280	0.211730
10	-0.20990287	9.08609580	-1.90719759		10.00000000	3.43400000	31.20165298	0.233073
11	-0.20008680	9.09143640	-1.81907642		11.00000000	3.12181818	28.38181145	0.254441
12	-0.18990827	9.09183030	-1.72661376		12.00000000	2.86166667	26.01778771	0.275918
13	-0.18010262	9.08338260	-1.63594100		13.00000000	2.64153846	23.99410450	0.297305
14	-0.16999182	9.09631630	-1.54629936		14.00000000	2.45285714	22.31196441	0.318663
15	-0.16012886	9.09342580	-1.45611991		15.00000000	2.28933333	20.81788280	0.340042
16	-0.14999275	9.08900640	-1.36328506		16.00000000	2.14625000	19.50727999	0.361519
17	-0.13983060	9.09299850	-1.27147944		17.00000000	2.02000000	18.36785697	0.382898
18	-0.12997881	9.08771800	-1.18121077		18.00000000	1.90777778	17.33734645	0.404268
19	-0.11986428	9.09820750	-1.09055009		19.00000000	1.80736842	16.44381292	0.425627
20	-0.11002960	9.08423710	-0.99953497		20.00000000	1.71700000	15.59763510	0.447111
21	-0.09989796	9.10621450	-0.90969223		21.00000000	1.63523810	14.89082885	0.468488
22	-0.09004244	9.08376600	-0.81792447		22.00000000	1.56090909	14.17893293	0.489879
23	-0.07995620	9.09218220	-0.72697637		23.00000000	1.49304348	13.57502334	0.511229
24	-0.07010590	9.09275820	-0.63745595		24.00000000	1.43083333	13.01022152	0.532702
25	-0.05991248	9.08765980	-0.54446427		25.00000000	1.37360000	12.48280950	0.554082
26	-0.04981731	9.09431550	-0.45305436		26.00000000	1.32076923	12.01149209	0.575462
27	-0.03997519	9.08998300	-0.36337382		27.00000000	1.27185185	11.56111171	0.596942
28	-0.02986290	9.08141800	-0.27119750		28.00000000	1.22642857	11.13771050	0.618332
29	-0.02001929	9.09608750	-0.18209724		29.00000000	1.18413793	10.77102223	0.639685
30	-0.00988616	9.09032150	-0.08986841		30.00000000	1.14466667	10.40538801	0.661057
31	-0.00061415	9.09188180	-0.00558376		31.00000000	1.10774194	10.07145874	0.682646
32	0.00952696	9.09068870	0.08660661		32.00000000	1.07312500	9.75544531	0.704015
33	0.01933382	9.09463410	0.17583401		33.00000000	1.04060606	9.46393136	0.725353
34	0.02947782	9.08309560	0.26774988		34.00000000	1.01000000	9.17392656	0.746733
35	0.03929585	9.09668350	0.35746189		35.00000000	0.98114286	8.92514604	0.768210
36	0.04941529	9.08351420	0.44886449		36.00000000	0.95388889	8.66466327	0.789600
37	0.05926755	9.08632280	0.53852410		37.00000000	0.92810811	8.43308986	0.810949
38	0.06941825	9.09265610	0.63119629		38.00000000	0.90368421	8.21688975	0.832330
39	0.07957267	9.06856250	0.72160973		39.00000000	0.88051282	7.98498554	0.853817
40	0.08937060	9.09401320	0.81273743		40.00000000	0.85850000	7.80721033	0.875240
41	0.09952428	9.10206890	0.90587687		41.00000000	0.83756098	7.62353771	0.896599
42	0.10931700	9.07141300	0.99165965		42.00000000	0.81761905	7.41696006	0.917997
43	0.11950194	9.10181900	1.08768503		43.00000000	0.79860465	7.26875499	0.939474
44	0.12928945	9.08997150	1.17523742		44.00000000	0.78045455	7.09430958	0.960854
45	0.13943866	9.08699040	1.26707776		45.00000000	0.76311111	6.93438334	0.982205
46	0.14928274	9.08889480	1.35681512		46.00000000	0.74652174	6.78505755	1.003580
47	0.15944684	9.10485460	1.45174029		47.00000000	0.73063830	6.65235547	1.025066
48	0.16958489	9.08428860	1.54055808		48.00000000	0.71541667	6.49905147	1.046463
49	0.17939770	9.08898350	1.63054274		49.00000000	0.70081633	6.36970803	1.067826
50	0.18954915	9.08172510	1.72143327		50.00000000	0.68680000	6.23732880	1.089177
51	0.19934708	9.08469390	1.81100720		51.00000000	0.67333333	6.11702723	1.110652
52	0.20949033	9.09710600	1.90575574		52.00000000	0.66038462	6.00758885	1.132027
53	0.21929348	9.08913990	1.99318912		53.00000000	0.64792453	5.88907668	1.153415
54	0.22947246	9.07767960	2.08307747		54.00000000	0.63592593	5.77273180	1.174768
55	0.23927633	9.10246280	2.17800389		55.00000000	0.62436364	5.68324677	1.196242
56	0.24944490	9.08118920	2.26525633		56.00000000	0.61321429	5.56871495	1.217629
57	0.25954053	9.09372430	2.36019002		57.00000000	0.60245614	5.47857004	1.239006
58	0.26939428	9.09070870	2.44898492		58.00000000	0.59206897	5.38232650	1.260480
59	0.27952266	9.09386630	2.54194170		59.00000000	0.58203390	5.29293845	1.281879
60	0.28938383	9.08930020	2.63029650		60.00000000	0.57233333	5.20210948	1.303221
61	0.29949287	9.08583930	2.72114409		61.00000000	0.56295082	5.11488068	1.324588
62	0.30935630	9.09420680	2.81335017		62.00000000	0.55387097	5.03701712	1.346082
63	0.31948391	9.08703230	2.90316061		63.00000000	0.54507937	4.95315380	1.367464
64	0.32929152	9.08397960	2.99127745		64.00000000	0.53656250	4.87412280	1.388822
65	0.33941171	9.07864570	3.08139866		65.00000000	0.52830769	4.79631836	1.410201
66	0.34922972	9.08714390	3.17350072		66.00000000	0.52030303	4.72806851	1.431677
67	0.35940427	9.08911710	3.26666750		67.00000000	0.51253731	4.65851166	1.453068
68	0.36954975	9.07583240	3.35397159		68.00000000	0.50500000	4.58329536	1.474406
69	0.37938043	9.08514120	3.44672478		69.00000000	0.49768116	4.52150361	1.495776
70	0.38953781	9.08300500	3.53817388		70.00000000	0.49057143	4.45586274	1.517246
71	0.39932162	9.08067040	3.62610801		71.00000000	0.48366197	4.39197495	1.538631
72	0.40950134	9.08116440	3.71874899		72.00000000	0.47694444	4.33121091	1.559981
73	0.41931787	9.07256130	3.80428708		73.00000000	0.47041096	4.26783226	1.581354
74	0.42944178	9.08704380	3.90235626		74.00000000	0.46405405	4.21687951	1.602844
75	0.43928286	9.05473710	3.97759081		75.00000000	0.45786667	4.14586229	1.624211
76	0.44944549	9.07986070	4.08090244		76.00000000	0.45184211	4.10266337	1.645566
77	0.45955229	9.06765270	4.16706056		77.00000000	0.44597403	4.04393758	1.666939
78	0.46946555	9.04732420	4.24740703		78.00000000	0.44025641	3.98314247	1.688421
79	0.47958577	9.06008630	4.34508846		79.00000000	0.43468354	3.93827042	1.709813
80	0.48941493	9.04656310	4.42752305		80.00000000	0.42925000	3.88323721	1.731176
81	0.49952248	9.02233220	4.50685776		81.00000000	0.42395062	3.82502331	1.752544
82	0.50937176	9.01371290	4.59133080		82.00000000	0.41878049	3.77476709	1.774031
83	0.51948750	8.98317530	4.66664728		83.00000000	0.41373494	3.71665349	1.795410
84	0.52932334	8.95988370	4.74267557		84.00000000	0.40880952	3.66288579	1.816803
85	0.53938848	8.89016720	4.79525377		85.00000000	0.40400000	3.59162755	1.838158
86	0.54957265	8.83093450	4.85324008		86.00000000	0.39930233	3.52621268	1.859636
87	0.55937582	8.72853950	4.88253394		87.00000000	0.39471264	3.44526490	1.881019
88	0.56953096	8.56515790	4.87812260		88.00000000	0.39022727	3.34235821	1.902397
89	0.57933784	8.39561560	4.86389781		89.00000000	0.38584270	3.23938696	1.923882
90	0.58945876	8.10835840	4.77954289		90.00000000	0.38155556	3.09378919	1.945264
91	0.59924704	7.72892570	4.63153585		91.00000000	0.37736264	2.91660779	1.966604
92	0.60934937	7.24626780	4.41550872		92.00000000	0.37326087	2.70474822	1.988072
93	0.61917257	6.60399390	4.08901188		93.00000000	0.36924731	2.43850699	2.009582
94	0.62924886	5.76080040	3.62497708		94.00000000	0.36531915	2.10453070	2.030980
95	0.63940698	4.66880800	2.98526842		95.00000000	0.36147368	1.68765123	2.052338
96	0.64919823	3.36575910	2.18504485		96.00000000	0.35770833	1.20396008	2.073714
97	0.65930504	1.70693020	1.12538768		97.00000000	0.35402062	0.60428849	2.095226
98	0.66898018	-0.20629236	-0.13800550		98.00000000	0.35040816	-0.07228653	2.116624
99	0.67908841	-2.53863500	-1.72395761		99.00000000	0.34686869	-0.88057299	2.137989
100	0.68882012	-5.18135020	-3.56901827		100.00000000	0.34340000	-1.77927566	2.159371
101	0.69904155	-8.32280250	-5.81798476		101.00000000	0.34000000	-2.82975285	2.180865
11:35 04/04/2018
Test Lot:	JK-PERC
Recipe:	Recipe_YJX-LID
Cell Name:	3-8-12h
Test Order:	7
Test Condition:	Light
1	-0.29990399	9.09275530	-2.72695359		1.00000000	34.34000000	312.24521700	0.000000
2	-0.29013407	9.09718610	-2.63940363		2.00000000	17.17000000	156.19868534	0.061800
3	-0.27994958	9.09117980	-2.54507197		3.00000000	11.44666667	104.06370478	0.083245
4	-0.27013874	9.09432220	-2.45672874		4.00000000	8.58500000	78.07475609	0.104763
5	-0.25992820	9.09470940	-2.36397144		5.00000000	6.86800000	62.46246416	0.126152
6	-0.24979509	9.09976290	-2.27307609		6.00000000	5.72333333	52.08097633	0.147520
7	-0.23995075	9.08831120	-2.18074709		7.00000000	4.90571429	44.58465809	0.168896
8	-0.22986823	9.09582140	-2.09084037		8.00000000	4.29250000	39.04381336	0.190386
9	-0.22003506	9.08192730	-1.99834242		9.00000000	3.81555556	34.65259816	0.211775
10	-0.20989747	9.10136700	-1.91035391		10.00000000	3.43400000	31.25409428	0.233128
11	-0.20006876	9.08138180	-1.81690080		11.00000000	3.12181818	28.35042282	0.254505
12	-0.18991926	9.09849450	-1.72797934		12.00000000	2.86166667	26.03685843	0.275982
13	-0.18012181	9.08736800	-1.63683317		13.00000000	2.64153846	24.00463209	0.297368
14	-0.16995743	9.09421250	-1.54562898		14.00000000	2.45285714	22.30680409	0.318707
15	-0.16012201	9.09278390	-1.45595483		15.00000000	2.28933333	20.81641328	0.340092
16	-0.14999560	9.10065750	-1.36505858		16.00000000	2.14625000	19.53228616	0.361572
17	-0.13984238	9.09128000	-1.27134623		17.00000000	2.02000000	18.36438560	0.382957
18	-0.13005906	9.08990860	-1.18222497		18.00000000	1.90777778	17.34152563	0.404305
19	-0.11993190	9.08263870	-1.08929812		19.00000000	1.80736842	16.41567437	0.425679
20	-0.11006225	9.09094330	-1.00056967		20.00000000	1.71700000	15.60914965	0.447154
21	-0.09992392	9.07884220	-0.90719347		21.00000000	1.63523810	14.84606863	0.468524
22	-0.09008776	9.09417250	-0.81927367		22.00000000	1.56090909	14.19517653	0.489879
23	-0.08000749	9.07482340	-0.72605381		23.00000000	1.49304348	13.54910589	0.511266
24	-0.07014974	9.09608460	-0.63808799		24.00000000	1.43083333	13.01498105	0.532742
25	-0.06000174	9.07058430	-0.54425082		25.00000000	1.37360000	12.45935459	0.554116
26	-0.04981206	9.09862800	-0.45322137		26.00000000	1.32076923	12.01718790	0.575511
27	-0.04004139	9.08706090	-0.36385856		27.00000000	1.27185185	11.55739523	0.596858
28	-0.02987850	9.09127040	-0.27163355		28.00000000	1.22642857	11.14979377	0.618326
29	-0.02011231	9.08394720	-0.18269913		29.00000000	1.18413793	10.75664644	0.639710
30	-0.00991667	9.09765530	-0.09021843		30.00000000	1.14466667	10.41378277	0.661097
31	-0.00066699	9.08647060	-0.00606057		31.00000000	1.10774194	10.06546453	0.682624
32	0.00948974	9.08810420	0.08624374		32.00000000	1.07312500	9.75267182	0.704094
33	0.01930925	9.09246830	0.17556870		33.00000000	1.04060606	9.46167762	0.725475
34	0.02944133	9.09499360	0.26776872		34.00000000	1.01000000	9.18594354	0.746873
35	0.03927721	9.08583930	0.35686639		35.00000000	0.98114286	8.91450633	0.768350
36	0.04941674	9.08952620	0.44917472		36.00000000	0.95388889	8.67039805	0.789739
37	0.05926452	9.08661080	0.53851365		37.00000000	0.92810811	8.43335716	0.811103
38	0.06940554	9.09879490	0.63150678		38.00000000	0.90368421	8.22243729	0.832482
39	0.07957111	9.08082770	0.72257157		39.00000000	0.88051282	7.99578521	0.853958
40	0.08936606	9.10273080	0.81347521		40.00000000	0.85850000	7.81469439	0.875353
41	0.09949740	9.08713820	0.90414662		41.00000000	0.83756098	7.61103234	0.896692
42	0.10932063	9.08785920	0.99349049		42.00000000	0.81761905	7.43040678	0.918062
43	0.11949439	9.09111500	1.08633724		43.00000000	0.79860465	7.26020672	0.939545
44	0.12930200	9.08944610	1.17528356		44.00000000	0.78045455	7.09389952	0.960913
45	0.13946161	9.09196950	1.26798070		45.00000000	0.76311111	6.93818295	0.982276
46	0.14925954	9.08729460	1.35636541		46.00000000	0.74652174	6.78386297	1.003658
47	0.15940575	9.08262160	1.44782211		47.00000000	0.73063830	6.63611119	1.025142
48	0.16957209	9.07962320	1.53965068		48.00000000	0.71541667	6.49571376	1.046540
49	0.17938191	9.09523390	1.63152043		49.00000000	0.70081633	6.37408841	1.067889
50	0.18952888	9.08391860	1.72166492		50.00000000	0.68680000	6.23883529	1.089313
51	0.19931638	9.08763220	1.81131395		51.00000000	0.67333333	6.11900568	1.110803
52	0.20944475	9.08224300	1.90222811		52.00000000	0.66038462	5.99777355	1.132190
53	0.21924119	9.08797070	1.99245751		53.00000000	0.64792453	5.88831913	1.153538
54	0.22940378	9.07845310	2.08263146		54.00000000	0.63592593	5.77322369	1.174915
55	0.23924263	9.08761880	2.17414582		55.00000000	0.62436364	5.67397872	1.196407
56	0.24937695	9.08607290	2.26585715		56.00000000	0.61321429	5.57170970	1.217778
57	0.25954103	9.08769510	2.35862975		57.00000000	0.60245614	5.47493771	1.239186
58	0.26935235	9.09167100	2.44886295		58.00000000	0.59206897	5.38289624	1.260538
59	0.27949339	9.08223150	2.53842367		59.00000000	0.58203390	5.28616661	1.282021
60	0.28933966	9.08431430	2.62845241		60.00000000	0.57233333	5.19925588	1.303416
61	0.29945761	9.07916740	2.71882577		61.00000000	0.56295082	5.11112473	1.324810
62	0.30929276	9.07867530	2.80796854		62.00000000	0.55387097	5.02841467	1.346172
63	0.31944343	9.09694770	2.90596018		63.00000000	0.54507937	4.95855848	1.367648
64	0.32925552	9.08735660	2.99206232		64.00000000	0.53656250	4.87593478	1.389019
65	0.33941886	9.09615990	3.08740822		65.00000000	0.52830769	4.80557125	1.410410
66	0.34920785	9.08765220	3.17347949		66.00000000	0.52030303	4.72833298	1.431889
67	0.35936970	9.08076290	3.26335104		67.00000000	0.51253731	4.65422982	1.453271
68	0.36952338	9.08725170	3.35795196		68.00000000	0.50500000	4.58906211	1.474631
69	0.37935627	9.08423710	3.44616230		69.00000000	0.49768116	4.52105365	1.496012
70	0.38950175	9.08080290	3.53698862		70.00000000	0.49057143	4.45478245	1.517484
71	0.39934433	9.07726000	3.62495231		71.00000000	0.48366197	4.39032547	1.538873
72	0.40948161	9.08244990	3.71909621		72.00000000	0.47694444	4.33182402	1.560221
73	0.41927880	9.07458310	3.80478031		73.00000000	0.47041096	4.26878334	1.581600
74	0.42946148	9.08584980	3.90202250		74.00000000	0.46405405	4.21632543	1.603081
75	0.43926165	9.06922910	3.98376454		75.00000000	0.45786667	4.15249770	1.624462
76	0.44942424	9.06592270	4.07444542		76.00000000	0.45184211	4.09636560	1.645821
77	0.45955932	9.06723790	4.16693368		77.00000000	0.44597403	4.04375259	1.667213
78	0.46939296	9.06643010	4.25571846		78.00000000	0.44025641	3.99155397	1.688699
79	0.47954217	9.05277350	4.34118665		79.00000000	0.43468354	3.93509167	1.710083
80	0.48938400	9.04418370	4.42607880		80.00000000	0.42925000	3.88221585	1.731445
81	0.49949375	9.03248980	4.51167220		81.00000000	0.42395062	3.82932963	1.752826
82	0.50931621	9.00977130	4.58882257		82.00000000	0.41878049	3.77311642	1.774310
83	0.51948476	8.98725130	4.66874008		83.00000000	0.41373494	3.71833988	1.795699
84	0.52926707	8.95048520	4.73719708		84.00000000	0.40880952	3.65904359	1.817052
85	0.53937161	8.89338680	4.79684036		85.00000000	0.40400000	3.59292827	1.838442
86	0.54953200	8.81956670	4.84663413		86.00000000	0.39930233	3.52167349	1.859922
87	0.55935967	8.71385570	4.87417945		87.00000000	0.39471264	3.43946902	1.881357
88	0.56946051	8.57536890	4.88333395		88.00000000	0.39022727	3.34634282	1.902729
89	0.57927108	8.37636570	4.85218641		89.00000000	0.38584270	3.23195953	1.924091
90	0.58941585	8.10216240	4.77554294		90.00000000	0.38155556	3.09142508	1.945572
91	0.59919065	7.74124340	4.63848066		91.00000000	0.37736264	2.92125603	1.966949
92	0.60932797	7.23423190	4.40801984		92.00000000	0.37326087	2.70025569	1.988439
93	0.61911625	6.59824660	4.08508169		93.00000000	0.36924731	2.43638482	2.009835
94	0.62924457	5.74485870	3.61492114		94.00000000	0.36531915	2.09870689	2.031317
95	0.63935208	4.64878420	2.97220985		95.00000000	0.36147368	1.68041315	2.052737
96	0.64914334	3.35337690	2.17682228		96.00000000	0.35770833	1.19953086	2.074140
97	0.65925831	1.69766470	1.11919956		97.00000000	0.35402062	0.60100831	2.095635
98	0.66892153	-0.21558721	-0.14421093		98.00000000	0.35040816	-0.07554352	2.117014
99	0.67907447	-2.54089690	-1.72545822		99.00000000	0.34686869	-0.88135757	2.138386
100	0.68878752	-5.17360400	-3.56351387		100.00000000	0.34340000	-1.77661561	2.159761
101	0.69906622	-8.31769470	-5.81461939		101.00000000	0.34000000	-2.82801620	2.181243
11:38 04/04/2018
Test Lot:	JK-PERC
Recipe:	Recipe_YJX-LID
Cell Name:	3-8-12h
Test Order:	8
Test Condition:	Light
1	-0.29989630	9.09385590	-2.72721374		1.00000000	34.34000000	312.28301161	0.000000
2	-0.29007924	9.09540270	-2.63838750		2.00000000	17.17000000	156.16806436	0.061880
3	-0.27995405	9.10622600	-2.54932485		3.00000000	11.44666667	104.23593361	0.083358
4	-0.27015111	9.09768300	-2.45774916		4.00000000	8.58500000	78.10360856	0.104856
5	-0.25997829	9.10065650	-2.36597311		5.00000000	6.86800000	62.50330884	0.126248
6	-0.24981661	9.10071660	-2.27351017		6.00000000	5.72333333	52.08643467	0.147608
7	-0.24000625	9.10559460	-2.18539961		7.00000000	4.90571429	44.66944551	0.168982
8	-0.22986616	9.11325170	-2.09482817		8.00000000	4.29250000	39.11863292	0.190466
9	-0.22004090	9.10066130	-2.00251770		9.00000000	3.81555556	34.72407878	0.211835
10	-0.20988445	9.09509560	-1.90891914		10.00000000	3.43400000	31.23255829	0.233211
11	-0.20005026	9.10208030	-1.82087353		11.00000000	3.12181818	28.41503977	0.254573
12	-0.18994591	9.09232710	-1.72705035		12.00000000	2.86166667	26.01920938	0.276049
13	-0.18013777	9.09009080	-1.63746869		13.00000000	2.64153846	24.01182447	0.297434
14	-0.17000885	9.09249110	-1.54580396		14.00000000	2.45285714	22.30258174	0.318824
15	-0.16016649	9.10408780	-1.45816979		15.00000000	2.28933333	20.84229167	0.340223
16	-0.15003161	9.08615400	-1.36321031		16.00000000	2.14625000	19.50115802	0.361692
17	-0.13986845	9.10675430	-1.27374761		17.00000000	2.02000000	18.39564369	0.383072
18	-0.13004915	9.08681490	-1.18173255		18.00000000	1.90777778	17.33562354	0.404457
19	-0.11989716	9.09657760	-1.09065382		19.00000000	1.80736842	16.44086709	0.425937
20	-0.11011135	9.09528260	-1.00149385		20.00000000	1.71700000	15.61660022	0.447313
21	-0.09991173	9.09819980	-0.90901685		21.00000000	1.63523810	14.87772291	0.468660
22	-0.09007977	9.08858870	-0.81869797		22.00000000	1.56090909	14.18646073	0.490044
23	-0.07998285	9.09745410	-0.72764034		23.00000000	1.49304348	13.58289451	0.511530
24	-0.07015835	9.09882070	-0.63835822		24.00000000	1.43083333	13.01889595	0.532912
25	-0.05998030	9.09410000	-0.54546687		25.00000000	1.37360000	12.49165576	0.554281
26	-0.04980822	9.09385970	-0.45294892		26.00000000	1.32076923	12.01089008	0.575662
27	-0.04001125	9.09990600	-0.36409858		27.00000000	1.27185185	11.57373230	0.597142
28	-0.02984362	9.09106730	-0.27131039		28.00000000	1.22642857	11.14954468	0.618544
29	-0.02004070	9.08478740	-0.18206548		29.00000000	1.18413793	10.75764136	0.639909
30	-0.00988573	9.10967540	-0.09005577		30.00000000	1.14466667	10.42754177	0.661286
31	-0.00061794	9.08643630	-0.00561488		31.00000000	1.10774194	10.06542653	0.682887
32	0.00951375	9.08765790	0.08645769		32.00000000	1.07312500	9.75219288	0.704276
33	0.01932384	9.10456660	0.17593514		33.00000000	1.04060606	9.47426718	0.725636
34	0.02947703	9.08738420	0.26786908		34.00000000	1.01000000	9.17825804	0.747021
35	0.03928712	9.08772280	0.35703042		35.00000000	0.98114286	8.91635431	0.768512
36	0.04941054	9.10813330	0.45003776		36.00000000	0.95388889	8.68814715	0.789915
37	0.05924891	9.08247760	0.53812686		37.00000000	0.92810811	8.42952110	0.811271
38	0.06938051	9.10504060	0.63171240		38.00000000	0.90368421	8.22808143	0.832652
39	0.07954189	9.08278270	0.72246172		39.00000000	0.88051282	7.99750661	0.854133
40	0.08936017	9.08494570	0.81183229		40.00000000	0.85850000	7.79942588	0.875510
41	0.09950294	9.11135390	0.90660653		41.00000000	0.83756098	7.63131446	0.896900
42	0.10931303	9.09350870	0.99403899		42.00000000	0.81761905	7.43502592	0.918253
43	0.11947367	9.08192540	1.08505096		43.00000000	0.79860465	7.25286787	0.939731
44	0.12927705	9.09134960	1.17530286		44.00000000	0.78045455	7.09538512	0.961108
45	0.13942876	9.09561350	1.26819011		45.00000000	0.76311111	6.94096372	0.982500
46	0.14925671	9.09875580	1.35805036		46.00000000	0.74652174	6.79241900	1.003909
47	0.15940171	9.10316850	1.45106063		47.00000000	0.73063830	6.65112354	1.025369
48	0.16954225	9.09779930	1.54246136		48.00000000	0.71541667	6.50871725	1.046746
49	0.17937988	9.09993270	1.63234484		49.00000000	0.70081633	6.37738141	1.068130
50	0.18954870	9.08504770	1.72205898		50.00000000	0.68680000	6.23961076	1.089622
51	0.19929403	9.09052180	1.81168672		51.00000000	0.67333333	6.12095135	1.110999
52	0.20944276	9.09504220	1.90489074		52.00000000	0.66038462	6.00622595	1.132353
53	0.21928783	9.09651760	1.99475561		53.00000000	0.64792453	5.89385688	1.153744
54	0.22944698	9.09572030	2.08698555		54.00000000	0.63592593	5.78420435	1.175227
55	0.23925036	9.08353420	2.17323883		55.00000000	0.62436364	5.67142844	1.196604
56	0.24939984	9.09884930	2.26925156		56.00000000	0.61321429	5.57954437	1.217957
57	0.25956419	9.07832050	2.35640691		57.00000000	0.60245614	5.46928993	1.239345
58	0.26937726	9.10526080	2.45275021		58.00000000	0.59206897	5.39094234	1.260828
59	0.27952376	9.08896920	2.54058285		59.00000000	0.58203390	5.29008818	1.282221
60	0.28934202	9.09595010	2.63184058		60.00000000	0.57233333	5.20591544	1.303574
61	0.29949895	9.08594420	2.72123075		61.00000000	0.56295082	5.11493973	1.324959
62	0.30931795	9.09720230	2.81392797		62.00000000	0.55387097	5.03867624	1.346451
63	0.31946743	9.08847520	2.90347181		63.00000000	0.54507937	4.95394029	1.367829
64	0.32927975	9.10370730	2.99766646		64.00000000	0.53656250	4.88470795	1.389202
65	0.33941358	9.09480380	3.08689992		65.00000000	0.52830769	4.80485481	1.410574
66	0.34922963	9.09979060	3.17791650		66.00000000	0.52030303	4.73464862	1.432052
67	0.35940740	9.08816720	3.26635454		67.00000000	0.51253731	4.65802480	1.453448
68	0.36956429	9.08952330	3.35916322		68.00000000	0.50500000	4.59020927	1.474800
69	0.37937886	9.09690670	3.45117409		69.00000000	0.49768116	4.52735907	1.496175
70	0.38949111	9.08773140	3.53959059		70.00000000	0.49057143	4.45818138	1.517656
71	0.39934435	9.08761120	3.62908619		71.00000000	0.48366197	4.39533195	1.539047
72	0.40948340	9.08885570	3.72173553		72.00000000	0.47694444	4.33487923	1.560442
73	0.41931137	9.09504220	3.81365461		73.00000000	0.47041096	4.27840752	1.581802
74	0.42947125	9.08673190	3.90249011		74.00000000	0.46405405	4.21673478	1.603282
75	0.43926796	9.09052660	3.99317707		75.00000000	0.45786667	4.16224911	1.624668
76	0.44943973	9.08507630	4.08319424		76.00000000	0.45184211	4.10502000	1.646067
77	0.45957360	9.08367060	4.17461520		77.00000000	0.44597403	4.05108115	1.667427
78	0.46943131	9.08531480	4.26493123		78.00000000	0.44025641	3.99986808	1.688911
79	0.47957259	9.06720450	4.34838275		79.00000000	0.43468354	3.94136459	1.710292
80	0.48938417	9.06170370	4.43465434		80.00000000	0.42925000	3.88973631	1.731678
81	0.49950314	9.06244470	4.52671958		81.00000000	0.42395062	3.84202902	1.753172
82	0.50932366	9.04147050	4.60503485		82.00000000	0.41878049	3.78639143	1.774556
83	0.51947236	9.01837160	4.68479478		83.00000000	0.41373494	3.73121543	1.795913
84	0.52927202	8.98466010	4.75532920		84.00000000	0.40880952	3.67301462	1.817305
85	0.53938502	8.94637870	4.82554265		85.00000000	0.40400000	3.61433699	1.838784
86	0.54954344	8.87023450	4.87457918		86.00000000	0.39930233	3.54190526	1.860162
87	0.55937958	8.77832700	4.91041687		87.00000000	0.39471264	3.46491666	1.881530
88	0.56952083	8.64685250	4.92456261		88.00000000	0.39022727	3.37423767	1.902912
89	0.57930934	8.46535300	4.90405806		89.00000000	0.38584270	3.26629463	1.924397
90	0.58942086	8.19464680	4.83009576		90.00000000	0.38155556	3.12671301	1.945788
91	0.59923989	7.84412050	4.70050991		91.00000000	0.37736264	2.96007800	1.967140
92	0.60937595	7.35147330	4.47981103		92.00000000	0.37326087	2.74401732	1.988604
93	0.61917263	6.70686770	4.15270891		93.00000000	0.36924731	2.47649287	2.010108
94	0.62926632	5.85379550	3.68359635		94.00000000	0.36531915	2.13850359	2.031490
95	0.63937038	4.75187920	3.03821081		95.00000000	0.36147368	1.71767928	2.052908
96	0.64914769	3.39734100	2.20537606		96.00000000	0.35770833	1.21525719	2.074314
97	0.65929866	1.66004790	1.09446736		97.00000000	0.35402062	0.58769118	2.095799
98	0.66901129	-0.37317652	-0.24965931		98.00000000	0.35040816	-0.13076410	2.117201
99	0.67908704	-2.90245320	-1.97101835		99.00000000	0.34686869	-1.00677013	2.138565
100	0.68877804	-5.82313730	-4.01084910		100.00000000	0.34340000	-1.99966535	2.159938
101	0.69909126	-9.38731580	-6.56259043		101.00000000	0.34000000	-3.19168737	2.181441
11:39 04/04/2018
Test Lot:	JK-PERC
Recipe:	Recipe_YJX-LID
Cell Name:	3-8-12h
Test Order:	9
Test Condition:	Light
1	-0.29994383	9.08760830	-2.72577204		1.00000000	34.34000000	312.06846902	0.000000
2	-0.29009420	9.09134960	-2.63734779		2.00000000	17.17000000	156.09847263	0.061798
3	-0.27996174	9.09256170	-2.54556939		3.00000000	11.44666667	104.07952293	0.083228
4	-0.27013740	9.08788680	-2.45497811		4.00000000	8.58500000	78.01950818	0.104725
5	-0.26000345	9.09188370	-2.36392113		5.00000000	6.86800000	62.44305725	0.126110
6	-0.24984345	9.08754830	-2.27046442		6.00000000	5.72333333	52.01106810	0.147459
7	-0.24002135	9.09308910	-2.18253552		7.00000000	4.90571429	44.60809710	0.168840
8	-0.22986358	9.10330100	-2.09251736		8.00000000	4.29250000	39.07591954	0.190326
9	-0.22002733	9.09508800	-2.00116793		9.00000000	3.81555556	34.70281355	0.211699
10	-0.20989338	9.08902840	-1.90772689		10.00000000	3.43400000	31.21172353	0.233048
11	-0.20008393	9.09191890	-1.81914686		11.00000000	3.12181818	28.38331773	0.254421
12	-0.18992840	9.09387300	-1.72718475		12.00000000	2.86166667	26.02363324	0.275878
13	-0.18012044	9.09986590	-1.63907185		13.00000000	2.64153846	24.03764577	0.297262
14	-0.16997606	9.08554550	-1.54432523		14.00000000	2.45285714	22.28554518	0.318609
15	-0.16019340	9.09931850	-1.45765077		15.00000000	2.28933333	20.83137315	0.339984
16	-0.15000065	9.09199430	-1.36380505		16.00000000	2.14625000	19.51369277	0.361458
17	-0.13985330	9.08949760	-1.27119623		17.00000000	2.02000000	18.36078515	0.382832
18	-0.13006841	9.08531860	-1.18171294		18.00000000	1.90777778	17.33276893	0.404206
19	-0.11987864	9.09591390	-1.09040579		19.00000000	1.80736842	16.43966754	0.425580
20	-0.11007515	9.08422570	-0.99994751		20.00000000	1.71700000	15.59761553	0.447057
21	-0.09991291	9.09035680	-0.90824402		21.00000000	1.63523810	14.86489774	0.468448
22	-0.09008709	9.07636170	-0.81766298		22.00000000	1.56090909	14.16737549	0.489827
23	-0.07995462	9.09655480	-0.72731156		23.00000000	1.49304348	13.58155182	0.511176
24	-0.07014442	9.08605100	-0.63733580		24.00000000	1.43083333	13.00062464	0.532651
25	-0.05996954	9.09637830	-0.54550560		25.00000000	1.37360000	12.49478523	0.554030
26	-0.04984452	9.08535860	-0.45285532		26.00000000	1.32076923	11.99966209	0.575408
27	-0.04003358	9.08611580	-0.36374970		27.00000000	1.27185185	11.55619321	0.596818
28	-0.02988772	9.09261990	-0.27175765		28.00000000	1.22642857	11.15144883	0.618287
29	-0.02008720	9.09088420	-0.18261037		29.00000000	1.18413793	10.76486081	0.639671
30	-0.00992868	9.09330080	-0.09028450		30.00000000	1.14466667	10.40879832	0.661038
31	-0.00066776	9.09689520	-0.00607452		31.00000000	1.10774194	10.07701230	0.682516
32	0.00946748	9.08851430	0.08604529		32.00000000	1.07312500	9.75311191	0.704005
33	0.01928111	9.09519000	0.17536540		33.00000000	1.04060606	9.46450984	0.725379
34	0.02942073	9.07682230	0.26704676		34.00000000	1.01000000	9.16759052	0.746738
35	0.03924777	9.10227300	0.35724388		35.00000000	0.98114286	8.93063014	0.768112
36	0.04941120	9.09331230	0.44931144		36.00000000	0.95388889	8.67400957	0.789586
37	0.05922707	9.09476090	0.53865602		37.00000000	0.92810811	8.44092133	0.810964
38	0.06937710	9.08635330	0.63038486		38.00000000	0.90368421	8.21119401	0.832364
39	0.07950705	9.10323430	0.72377126		39.00000000	0.88051282	8.01551451	0.853705
40	0.08934003	9.07568740	0.81082219		40.00000000	0.85850000	7.79147763	0.875187
41	0.09949156	9.09502980	0.90487869		41.00000000	0.83756098	7.61764203	0.896572
42	0.10930371	9.09081750	0.99366008		42.00000000	0.81761905	7.43282555	0.917945
43	0.11944928	9.10105130	1.08711403		43.00000000	0.79860465	7.26814190	0.939440
44	0.12929268	9.09196090	1.17552399		44.00000000	0.78045455	7.09586221	0.960813
45	0.13943379	9.08288860	1.26646158		45.00000000	0.76311111	6.93125321	0.982152
46	0.14925860	9.08340070	1.35577567		46.00000000	0.74652174	6.78095609	1.003528
47	0.15941310	9.10334780	1.45119289		47.00000000	0.73063830	6.65125454	1.025012
48	0.16953485	9.09140490	1.54130997		48.00000000	0.71541667	6.50414259	1.046383
49	0.17938942	9.08787820	1.63026920		49.00000000	0.70081633	6.36893342	1.067747
50	0.18953723	9.08963110	1.72282350		50.00000000	0.68680000	6.24275864	1.089120
51	0.19931588	9.10002140	1.81377877		51.00000000	0.67333333	6.12734774	1.110591
52	0.20945551	9.07983970	1.90182246		52.00000000	0.66038462	5.99618645	1.131974
53	0.21927583	9.08754160	1.99267823		53.00000000	0.64792453	5.88804110	1.153329
54	0.22942810	9.09337620	2.08627602		54.00000000	0.63592593	5.78271368	1.174701
55	0.23925291	9.07855800	2.17207142		55.00000000	0.62436364	5.66832149	1.196183
56	0.24937689	9.09126470	2.26715132		56.00000000	0.61321429	5.57489339	1.217557
57	0.25954404	9.09682850	2.36102762		57.00000000	0.60245614	5.48044019	1.238939
58	0.26936141	9.08228780	2.44641785		58.00000000	0.59206897	5.37734074	1.260313
59	0.27951667	9.09936050	2.54342295		59.00000000	0.58203390	5.29613626	1.281791
60	0.28933400	9.08752630	2.62933033		60.00000000	0.57233333	5.20109422	1.303195
61	0.29944757	9.09519480	2.72353398		61.00000000	0.56295082	5.12014737	1.324542
62	0.30928728	9.09756950	2.81376253		62.00000000	0.55387097	5.03887962	1.345919
63	0.31944177	9.08639140	2.90257295		63.00000000	0.54507937	4.95280446	1.367390
64	0.32923681	9.09477620	2.99433510		64.00000000	0.53656250	4.87991585	1.388759
65	0.33939949	9.08773330	3.08437205		65.00000000	0.52830769	4.80111941	1.410135
66	0.34922132	9.09214400	3.17517053		66.00000000	0.52030303	4.73067008	1.431506
67	0.35935423	9.08850100	3.26599128		67.00000000	0.51253731	4.65819589	1.452979
68	0.36952734	9.08421040	3.35686411		68.00000000	0.50500000	4.58752625	1.474344
69	0.37934619	9.08423900	3.44607145		69.00000000	0.49768116	4.52105460	1.495732
70	0.38948730	9.08946420	3.54023087		70.00000000	0.49057143	4.45903144	1.517108
71	0.39928454	9.08080580	3.62582537		71.00000000	0.48366197	4.39204044	1.538579
72	0.40946138	9.08633800	3.72050450		72.00000000	0.47694444	4.33367843	1.559963
73	0.41927725	9.08850100	3.81060171		73.00000000	0.47041096	4.27533047	1.581341
74	0.42941388	9.08208270	3.89997237		74.00000000	0.46405405	4.21457730	1.602818
75	0.43923572	9.08884330	3.99214463		75.00000000	0.45786667	4.16147839	1.624191
76	0.44940212	9.07255650	4.07722612		76.00000000	0.45184211	4.09936303	1.645547
77	0.45952910	9.07299900	4.16930706		77.00000000	0.44597403	4.04632189	1.666928
78	0.46941492	9.07989980	4.26224044		78.00000000	0.44025641	3.99748409	1.688392
79	0.47952849	9.06509300	4.34697036		79.00000000	0.43468354	3.94044675	1.709754
80	0.48938680	9.06425380	4.43592616		80.00000000	0.42925000	3.89083094	1.731115
81	0.49949962	9.05365470	4.52229708		81.00000000	0.42395062	3.83830250	1.752489
82	0.50930953	9.02853300	4.59831790		82.00000000	0.41878049	3.78097345	1.773964
83	0.51944470	9.00448890	4.67733404		83.00000000	0.41373494	3.72547167	1.795345
84	0.52922857	8.97754190	4.75117166		84.00000000	0.40880952	3.67010463	1.816691
85	0.53935921	8.93782710	4.82069936		85.00000000	0.40400000	3.61088215	1.838109
86	0.54952341	8.85917090	4.86832180		86.00000000	0.39930233	3.53748754	1.859593
87	0.55935121	8.77274700	4.90704665		87.00000000	0.39471264	3.46271416	1.880964
88	0.56946772	8.63239380	4.91586962		88.00000000	0.39022727	3.36859549	1.902338
89	0.57929325	8.44544320	4.89238824		89.00000000	0.38584270	3.25861258	1.923706
90	0.58941877	8.18138500	4.82226188		90.00000000	0.38155556	3.12165290	1.945184
91	0.59921753	7.82941440	4.69152236		91.00000000	0.37736264	2.95452847	1.966578
92	0.60933852	7.34415820	4.47507849		92.00000000	0.37326087	2.74128688	1.988035
93	0.61908889	6.70414020	4.15045871		93.00000000	0.36924731	2.47548575	2.009434
94	0.62924266	5.85245510	3.68261441		94.00000000	0.36531915	2.13801392	2.030936
95	0.63932645	4.74934050	3.03637900		95.00000000	0.36147368	1.71676161	2.052462
96	0.64910364	3.41458200	2.21641761		96.00000000	0.35770833	1.22142444	2.073840
97	0.65925217	1.68688460	1.11208233		97.00000000	0.35402062	0.59719193	2.095211
98	0.66893780	-0.33871815	-0.22658137		98.00000000	0.35040816	-0.11868960	2.116691
99	0.67903274	-2.83871770	-1.92758226		99.00000000	0.34686869	-0.98466228	2.138064
100	0.68875557	-5.73232700	-3.94817215		100.00000000	0.34340000	-1.96848109	2.159452
101	0.69902545	-9.23501680	-6.45551177		101.00000000	0.34000000	-3.13990571	2.180790
