# Supplementary material for: Study on the Electrical Injection Regeneration of Industrialized B-Doped Czochralski Silicon PERC Solar Cells
Source: Hindawi journal article supplement (doi:10.1155/2019/5357370), 2019-06-20
Supplement: f1 [file 5357370.f1.zip › section3.3/IVRawData_3-12-2.5h.csv]

00:46 04/04/2018
Test Lot:	JK-PERC
Recipe:	Recipe_YJX-LID
Cell Name:	3-12-2.5h
Test Order:	2
Test Condition:	Light
1	-0.29992762	9.10634040	-2.73124300		1.00000000	34.34000000	312.71172934	0.000000
2	-0.29014492	9.09446620	-2.63871317		2.00000000	17.17000000	156.15198465	0.061799
3	-0.27999154	9.09278110	-2.54590178		3.00000000	11.44666667	104.08203432	0.083265
4	-0.27018279	9.10476970	-2.45995208		4.00000000	8.58500000	78.16444787	0.104660
5	-0.26002571	9.10129360	-2.36657033		5.00000000	6.86800000	62.50768444	0.126147
6	-0.24985225	9.10360530	-2.27455627		6.00000000	5.72333333	52.10296767	0.147520
7	-0.24003606	9.10120680	-2.18461782		7.00000000	4.90571429	44.64792022	0.168906
8	-0.22986707	9.10605810	-2.09318289		8.00000000	4.29250000	39.08775439	0.190394
9	-0.22008063	9.09467790	-2.00156244		9.00000000	3.81555556	34.70124879	0.211760
10	-0.20996077	9.10018060	-1.91068093		10.00000000	3.43400000	31.25002018	0.233111
11	-0.20008726	9.09756850	-1.82030755		11.00000000	3.12181818	28.40095475	0.254485
12	-0.18995623	9.09744830	-1.72811698		12.00000000	2.86166667	26.03386455	0.275953
13	-0.18017128	9.09895230	-1.63936988		13.00000000	2.64153846	24.03523246	0.297333
14	-0.17001569	9.09596160	-1.54645619		14.00000000	2.45285714	22.31109438	0.318702
15	-0.16021289	9.09085660	-1.45647241		15.00000000	2.28933333	20.81200104	0.340070
16	-0.15004836	9.10602860	-1.36634466		16.00000000	2.14625000	19.54381388	0.361552
17	-0.13990393	9.08204170	-1.27061333		17.00000000	2.02000000	18.34572423	0.382928
18	-0.13010485	9.09579470	-1.18340701		18.00000000	1.90777778	17.35275500	0.404289
19	-0.11996117	9.09729480	-1.09132213		19.00000000	1.80736842	16.44216334	0.425665
20	-0.11008617	9.08521270	-1.00015627		20.00000000	1.71700000	15.59931021	0.447135
21	-0.09994026	9.10327430	-0.90978355		21.00000000	1.63523810	14.88602093	0.468522
22	-0.09011363	9.09026910	-0.81915716		22.00000000	1.56090909	14.18908368	0.489879
23	-0.07998855	9.09403040	-0.72741834		23.00000000	1.49304348	13.57778278	0.511246
24	-0.07014779	9.10306260	-0.63855972		24.00000000	1.43083333	13.02496540	0.532720
25	-0.06002272	9.08718970	-0.54543783		25.00000000	1.37360000	12.48216377	0.554095
26	-0.04987085	9.10019400	-0.45383440		26.00000000	1.32076923	12.01925623	0.575441
27	-0.04004943	9.08584790	-0.36388307		27.00000000	1.27185185	11.55585248	0.596820
28	-0.02987152	9.09358310	-0.27163911		28.00000000	1.22642857	11.15263013	0.618300
29	-0.02005159	9.10257050	-0.18252102		29.00000000	1.18413793	10.77869900	0.639682
30	-0.00995629	9.09174920	-0.09052007		30.00000000	1.14466667	10.40702225	0.661053
31	-0.00068191	9.09907050	-0.00620478		31.00000000	1.10774194	10.07942197	0.682536
32	0.00948240	9.08905410	0.08618605		32.00000000	1.07312500	9.75369118	0.704004
33	0.01927004	9.08282090	0.17502634		33.00000000	1.04060606	9.45163848	0.725384
34	0.02941939	9.09626200	0.26760647		34.00000000	1.01000000	9.18722462	0.746768
35	0.03926062	9.08973500	0.35686861		35.00000000	0.98114286	8.91832857	0.768118
36	0.04939285	9.10310460	0.44962823		36.00000000	0.95388889	8.68335033	0.789594
37	0.05920207	9.07825280	0.53745137		37.00000000	0.92810811	8.42560003	0.810967
38	0.06932686	9.09477520	0.63051216		38.00000000	0.90368421	8.21880475	0.832366
39	0.07951268	9.09434600	0.72311581		39.00000000	0.88051282	8.00768825	0.853856
40	0.08931818	9.07899570	0.81091936		40.00000000	0.85850000	7.79431781	0.875240
41	0.09949432	9.10293770	0.90569056		41.00000000	0.83756098	7.62426538	0.896610
42	0.10927675	9.08962820	0.99328503		42.00000000	0.81761905	7.43185315	0.917981
43	0.11942907	9.10229300	1.08707839		43.00000000	0.79860465	7.26913353	0.939452
44	0.12928519	9.09492210	1.17583873		44.00000000	0.78045455	7.09817329	0.960831
45	0.13942635	9.10654540	1.26969239		45.00000000	0.76311111	6.94930598	0.982176
46	0.14925270	9.09402750	1.35730816		46.00000000	0.74652174	6.78888923	1.003551
47	0.15936036	9.09284590	1.44903920		47.00000000	0.73063830	6.64358145	1.025026
48	0.16952980	9.09485340	1.54184868		48.00000000	0.71541667	6.50660970	1.046391
49	0.17934647	9.09722330	1.63155489		49.00000000	0.70081633	6.37548261	1.067760
50	0.18950178	9.09236530	1.72301941		50.00000000	0.68680000	6.24463649	1.089138
51	0.19928198	9.09673600	1.81281556		51.00000000	0.67333333	6.12513557	1.110611
52	0.20943356	9.09620860	1.90505135		52.00000000	0.66038462	6.00699622	1.131998
53	0.21926585	9.09501550	1.99422630		53.00000000	0.64792453	5.89288363	1.153340
54	0.22940403	9.08421130	2.08395468		54.00000000	0.63592593	5.77688548	1.174711
55	0.23919837	9.10354140	2.17755226		55.00000000	0.62436364	5.68392021	1.196190
56	0.24939683	9.08184810	2.26498413		56.00000000	0.61321429	5.56911900	1.217564
57	0.25950226	9.09999850	2.36147018		57.00000000	0.60245614	5.48234997	1.238916
58	0.26935095	9.08585450	2.44728354		58.00000000	0.59206897	5.37945247	1.260299
59	0.27947572	9.08791260	2.53985092		59.00000000	0.58203390	5.28947320	1.281775
60	0.28930953	9.08711620	2.62898932		60.00000000	0.57233333	5.20085951	1.303153
61	0.29946482	9.09536930	2.72374313		61.00000000	0.56295082	5.12024560	1.324527
62	0.30926883	9.09521870	2.81286765		62.00000000	0.55387097	5.03757758	1.345889
63	0.31943679	9.08674430	2.90264043		63.00000000	0.54507937	4.95299681	1.367365
64	0.32925719	9.10298060	2.99722181		64.00000000	0.53656250	4.88431803	1.388736
65	0.33940801	9.07803150	3.08115661		65.00000000	0.52830769	4.79599387	1.410119
66	0.34922096	9.08897590	3.17406089		66.00000000	0.52030303	4.72902170	1.431478
67	0.35936064	9.08052920	3.26318478		67.00000000	0.51253731	4.65411004	1.452946
68	0.36950254	9.08153440	3.35565003		68.00000000	0.50500000	4.58617487	1.474319
69	0.37933111	9.08817100	3.44742599		69.00000000	0.49768116	4.52301148	1.495715
70	0.38948193	9.07268050	3.53364511		70.00000000	0.49057143	4.45079783	1.517187
71	0.39930457	9.10029220	3.63378826		71.00000000	0.48366197	4.40146527	1.538550
72	0.40946284	9.07057950	3.71406524		72.00000000	0.47694444	4.32616250	1.559906
73	0.41927579	9.08653930	3.80976594		73.00000000	0.47041096	4.27440767	1.581283
74	0.42941323	9.07052140	3.89500189		74.00000000	0.46405405	4.20921223	1.602753
75	0.43922395	9.07875350	3.98760597		75.00000000	0.45786667	4.15685860	1.624148
76	0.44936585	9.05956360	4.07105850		76.00000000	0.45184211	4.09349229	1.645491
77	0.45954496	9.06528090	4.16590415		77.00000000	0.44597403	4.04287982	1.666874
78	0.46940479	9.04790780	4.24713126		78.00000000	0.44025641	3.98339941	1.688349
79	0.47951916	9.04377270	4.33666229		79.00000000	0.43468354	3.93117917	1.709721
80	0.48935145	9.03345010	4.42053190		80.00000000	0.42925000	3.87760846	1.731076
81	0.49949262	9.01710890	4.50397935		81.00000000	0.42395062	3.82280888	1.752455
82	0.50930929	8.99811840	4.58282529		82.00000000	0.41878049	3.76823641	1.773926
83	0.51941550	8.97389790	4.66118166		83.00000000	0.41373494	3.71281511	1.795308
84	0.52922696	8.93832300	4.73040151		84.00000000	0.40880952	3.65407157	1.816653
85	0.53934950	8.88580990	4.79255713		85.00000000	0.40400000	3.58986720	1.838031
86	0.54953456	8.80946730	4.84110674		86.00000000	0.39930233	3.51764078	1.859554
87	0.55932963	8.70036600	4.86637250		87.00000000	0.39471264	3.43414446	1.880949
88	0.56947529	8.59828380	4.89651016		88.00000000	0.39022727	3.35528484	1.902293
89	0.57926810	8.39155480	4.86096001		89.00000000	0.38584270	3.23782013	1.923674
90	0.58938992	8.12610340	4.78944343		90.00000000	0.38155556	3.10055990	1.945145
91	0.59922224	7.79069190	4.66835585		91.00000000	0.37736264	2.93991604	1.966532
92	0.60931128	7.31696510	4.45830937		92.00000000	0.37326087	2.73113676	1.987991
93	0.61913317	6.70216320	4.14953155		93.00000000	0.36924731	2.47475575	2.009372
94	0.62924379	5.89406680	3.70880493		94.00000000	0.36531915	2.15321547	2.030857
95	0.63937604	4.82482530	3.08487769		95.00000000	0.36147368	1.74404738	2.052233
96	0.64913988	3.52283810	2.28681470		96.00000000	0.35770833	1.26014855	2.073658
97	0.65923190	1.82485080	1.20299986		97.00000000	0.35402062	0.64603481	2.095032
98	0.66898608	-0.14790723	-0.09894788		98.00000000	0.35040816	-0.05182790	2.116510
99	0.67906171	-2.62260200	-1.78090860		99.00000000	0.34686869	-0.90969851	2.137884
100	0.68877268	-5.47472330	-3.77083984		100.00000000	0.34340000	-1.88001998	2.159284
101	0.69902474	-8.94531920	-6.25299943		101.00000000	0.34000000	-3.04140853	2.180777
00:46 04/04/2018
Test Lot:	JK-PERC
Recipe:	Recipe_YJX-LID
Cell Name:	3-12-2.5h
Test Order:	3
Test Condition:	Light
1	-0.29998270	9.09627060	-2.72872381		1.00000000	34.34000000	312.36593240	0.000000
2	-0.29009134	9.10170560	-2.64032597		2.00000000	17.17000000	156.27628515	0.021583
3	-0.27999750	9.09574790	-2.54678667		3.00000000	11.44666667	104.11599430	0.043022
4	-0.27017385	9.09425740	-2.45703053		4.00000000	8.58500000	78.07419978	0.064392
5	-0.26001084	9.07831290	-2.36045976		5.00000000	6.86800000	62.34985300	0.085786
6	-0.24983217	9.09864040	-2.27313308		6.00000000	5.72333333	52.07455189	0.107276
7	-0.24000032	9.08906940	-2.18137956		7.00000000	4.90571429	44.58837760	0.128719
8	-0.22987823	9.09149930	-2.08993777		8.00000000	4.29250000	39.02526075	0.150102
9	-0.22007841	9.09476470	-2.00156135		9.00000000	3.81555556	34.70157998	0.171539
10	-0.20991611	9.09113220	-1.90837511		10.00000000	3.43400000	31.21894797	0.192892
11	-0.20011926	9.09133050	-1.81935033		11.00000000	3.12181818	28.38148085	0.214411
12	-0.18994804	9.10006900	-1.72854027		12.00000000	2.86166667	26.04136412	0.235797
13	-0.18011546	9.08496190	-1.63634209		13.00000000	2.64153846	23.99827628	0.257186
14	-0.17000453	9.09391210	-1.54600625		14.00000000	2.45285714	22.30606725	0.278550
15	-0.16016749	9.09768200	-1.45715289		15.00000000	2.28933333	20.82762666	0.300027
16	-0.15004687	9.09097670	-1.36407260		16.00000000	2.14625000	19.51150874	0.321417
17	-0.13988087	9.09545900	-1.27228072		17.00000000	2.02000000	18.37282718	0.342799
18	-0.13006541	9.09290790	-1.18267279		18.00000000	1.90777778	17.34724763	0.364144
19	-0.11990610	9.10440250	-1.09167340		19.00000000	1.80736842	16.45500957	0.385610
20	-0.11009213	9.09527590	-1.00131830		20.00000000	1.71700000	15.61658872	0.406976
21	-0.09995738	9.10045910	-0.90965802		21.00000000	1.63523810	14.88141740	0.428359
22	-0.09013224	9.08984180	-0.81928777		22.00000000	1.56090909	14.18841670	0.449855
23	-0.07998930	9.09046940	-0.72714027		23.00000000	1.49304348	13.57246605	0.471249
24	-0.07019319	9.09803960	-0.63862046		24.00000000	1.43083333	13.01777833	0.492598
25	-0.06004430	9.09549900	-0.54613287		25.00000000	1.37360000	12.49357743	0.513983
26	-0.04988499	9.09335330	-0.45362184		26.00000000	1.32076923	12.01022124	0.535461
27	-0.04006134	9.09578320	-0.36438929		27.00000000	1.27185185	11.56848871	0.556834
28	-0.02994148	9.10264020	-0.27254649		28.00000000	1.22642857	11.16373802	0.578187
29	-0.02010220	9.09785750	-0.18288698		29.00000000	1.18413793	10.77311816	0.599557
30	-0.00994438	9.10151580	-0.09050892		30.00000000	1.14466667	10.41820175	0.621039
31	-0.00069531	9.08070280	-0.00631391		31.00000000	1.10774194	10.05907530	0.642527
32	0.00942361	9.09924130	0.08574766		32.00000000	1.07312500	9.76462332	0.663881
33	0.01925665	9.09467790	0.17513299		33.00000000	1.04060606	9.46397694	0.685266
34	0.02940227	9.09337810	0.26736597		34.00000000	1.01000000	9.18431188	0.706746
35	0.03923903	9.08514210	0.35649220		35.00000000	0.98114286	8.91382228	0.728134
36	0.04938094	9.09654050	0.44919571		36.00000000	0.95388889	8.67708891	0.749485
37	0.05921398	9.08609200	0.53802368		37.00000000	0.92810811	8.43287566	0.770860
38	0.06938342	9.10427570	0.63168578		38.00000000	0.90368421	8.22739020	0.792347
39	0.07951938	9.08821770	0.72268940		39.00000000	0.88051282	8.00229220	0.813743
40	0.08933529	9.08985710	0.81204505		40.00000000	0.85850000	7.80364232	0.835090
41	0.09949655	9.09205150	0.90462777		41.00000000	0.83756098	7.61514752	0.856462
42	0.10930057	9.08550450	0.99305082		42.00000000	0.81761905	7.42848154	0.877953
43	0.11945736	9.09676270	1.08667526		43.00000000	0.79860465	7.26471700	0.899337
44	0.12929411	9.09569640	1.17601997		44.00000000	0.78045455	7.09877760	0.920714
45	0.13942710	9.10169890	1.26902348		45.00000000	0.76311111	6.94560756	0.942081
46	0.14922367	9.07802300	1.35465591		46.00000000	0.74652174	6.77694152	0.963553
47	0.15941022	9.09852030	1.45039712		47.00000000	0.73063830	6.64772739	0.984950
48	0.16953948	9.09781930	1.54243955		48.00000000	0.71541667	6.50873156	1.006338
49	0.17933159	9.10110860	1.63211628		49.00000000	0.70081633	6.37820550	1.027692
50	0.18950103	9.08454800	1.72153120		50.00000000	0.68680000	6.23926757	1.049166
51	0.19929612	9.10471820	1.81453501		51.00000000	0.67333333	6.13051025	1.070540
52	0.20941271	9.09144210	1.90386353		52.00000000	0.66038462	6.00384849	1.091918
53	0.21925022	9.09704110	1.99452826		53.00000000	0.64792453	5.89419606	1.113421
54	0.22940031	9.09102340	2.08548359		54.00000000	0.63592593	5.78121747	1.134802
55	0.23922442	9.09557250	2.17588306		55.00000000	0.62436364	5.67894472	1.156151
56	0.24937227	9.08934780	2.26663129		56.00000000	0.61321429	5.57371792	1.177540
57	0.25949186	9.09061430	2.35894041		57.00000000	0.60245614	5.47669640	1.199009
58	0.26933604	9.09855650	2.45056918		58.00000000	0.59206897	5.38697293	1.220393
59	0.27948317	9.07883360	2.53738119		59.00000000	0.58203390	5.28418891	1.241745
60	0.28930804	9.09828000	2.63220555		60.00000000	0.57233333	5.20724892	1.263120
61	0.29945290	9.07325840	2.71701354		61.00000000	0.56295082	5.10779825	1.284592
62	0.30928075	9.10391040	2.81566424		62.00000000	0.55387097	5.04239166	1.305972
63	0.31942412	9.07062820	2.89737743		63.00000000	0.54507937	4.94421226	1.327324
64	0.32922444	9.09907910	2.99563922		64.00000000	0.53656250	4.88222463	1.348709
65	0.33937973	9.07783600	3.08083353		65.00000000	0.52830769	4.79589059	1.370185
66	0.34920606	9.08840850	3.17372732		66.00000000	0.52030303	4.72872648	1.391563
67	0.35938323	9.08068370	3.26344544		67.00000000	0.51253731	4.65418923	1.412924
68	0.36958826	9.09511470	3.36144762		68.00000000	0.50500000	4.59303292	1.474626
69	0.37942487	9.07752130	3.44423734		69.00000000	0.49768116	4.51771133	1.496001
70	0.38955918	9.07952880	3.53701379		70.00000000	0.49057143	4.45415741	1.517392
71	0.39937276	9.08963200	3.63015142		71.00000000	0.48366197	4.39630934	1.538879
72	0.40952492	9.07131480	3.71492947		72.00000000	0.47694444	4.32651320	1.560252
73	0.41933775	9.08941840	3.81153626		73.00000000	0.47041096	4.27576203	1.581607
74	0.42949438	9.06042480	3.89140153		74.00000000	0.46405405	4.20452686	1.602984
75	0.43930349	9.07329560	3.98593042		75.00000000	0.45786667	4.15435961	1.624464
76	0.44946757	9.06540680	4.07460637		76.00000000	0.45184211	4.09613249	1.645851
77	0.45956245	9.06291010	4.16497317		77.00000000	0.44597403	4.04182250	1.667211
78	0.46945637	9.04473590	4.24610888		78.00000000	0.44025641	3.98200296	1.688578
79	0.47958773	9.05021480	4.34037197		79.00000000	0.43468354	3.93397945	1.710035
80	0.48941168	9.02980710	4.41929306		80.00000000	0.42925000	3.87604470	1.731416
81	0.49955496	9.01567170	4.50382352		81.00000000	0.42395062	3.82219958	1.752799
82	0.50938636	9.00402640	4.58652823		82.00000000	0.41878049	3.77071057	1.774168
83	0.51952070	8.97063160	4.66042881		83.00000000	0.41373494	3.71146372	1.795648
84	0.52930075	8.92980000	4.72654984		84.00000000	0.40880952	3.65058729	1.817024
85	0.53943729	8.88377380	4.79223886		85.00000000	0.40400000	3.58904462	1.838419
86	0.54956716	8.81052110	4.84197306		86.00000000	0.39930233	3.51806156	1.859904
87	0.55937105	8.71723460	4.87616867		87.00000000	0.39471264	3.44080271	1.881338
88	0.56950462	8.57709030	4.88469255		88.00000000	0.39022727	3.34701456	1.902689
89	0.57930851	8.38485720	4.85741913		89.00000000	0.38584270	3.23523591	1.924075
90	0.58944952	8.11889840	4.78568076		90.00000000	0.38155556	3.09781079	1.945562
91	0.59924448	7.78641510	4.66596627		91.00000000	0.37736264	2.93830214	1.966957
92	0.60934305	7.31310510	4.45618977		92.00000000	0.37326087	2.72969597	1.988414
93	0.61914474	6.69313290	4.14401803		93.00000000	0.36924731	2.47142133	2.009824
94	0.62927753	5.88160230	3.70116017		94.00000000	0.36531915	2.14866195	2.031321
95	0.63941115	4.81121830	3.07634663		95.00000000	0.36147368	1.73912880	2.052697
96	0.64918077	3.50444980	2.27502142		96.00000000	0.35770833	1.25357090	2.074047
97	0.65925854	1.83391630	1.20902498		97.00000000	0.35402062	0.64924418	2.095429
98	0.66901702	-0.16311648	-0.10912770		98.00000000	0.35040816	-0.05715735	2.116907
99	0.67910892	-2.59491800	-1.76223196		99.00000000	0.34686869	-0.90009580	2.138291
100	0.68881452	-5.44464400	-3.75034984		100.00000000	0.34340000	-1.86969075	2.159640
101	0.69908434	-8.88987830	-6.21477470		101.00000000	0.34000000	-3.02255862	2.181056
00:47 04/04/2018
Test Lot:	JK-PERC
Recipe:	Recipe_YJX-LID
Cell Name:	3-12-2.5h
Test Order:	4
Test Condition:	Light
1	-0.29992098	9.08976170	-2.72621024		1.00000000	34.34000000	312.14241678	0.000000
2	-0.29003870	9.08970360	-2.63636582		2.00000000	17.17000000	156.07021081	0.061782
3	-0.27993166	9.07914070	-2.54153893		3.00000000	11.44666667	103.92589721	0.083210
4	-0.27009180	9.10420610	-2.45897141		4.00000000	8.58500000	78.15960937	0.104719
5	-0.25995424	9.09156610	-2.36339116		5.00000000	6.86800000	62.44087597	0.126094
6	-0.24981149	9.10100650	-2.27353599		6.00000000	5.72333333	52.08809387	0.147448
7	-0.23997460	9.07939820	-2.17882495		7.00000000	4.90571429	44.54093346	0.168871
8	-0.22981249	9.09446620	-2.09002192		8.00000000	4.29250000	39.03799616	0.190366
9	-0.21999794	9.09157940	-2.00012874		9.00000000	3.81555556	34.68942629	0.211775
10	-0.20984401	9.10418420	-1.91045852		10.00000000	3.43400000	31.26376854	0.233145
11	-0.20000416	9.09105210	-1.81824824		11.00000000	3.12181818	28.38061174	0.254508
12	-0.18987033	9.08565810	-1.72509690		12.00000000	2.86166667	26.00012493	0.275981
13	-0.18010044	9.10516550	-1.63984431		13.00000000	2.64153846	24.05164487	0.297347
14	-0.16993237	9.09004880	-1.54469354		14.00000000	2.45285714	22.29659113	0.318737
15	-0.16010368	9.09274100	-1.45578130		15.00000000	2.28933333	20.81631506	0.340098
16	-0.14996985	9.08489320	-1.36246007		16.00000000	2.14625000	19.49845203	0.361578
17	-0.13981666	9.09511380	-1.27164843		17.00000000	2.02000000	18.37212988	0.382970
18	-0.13001254	9.09318640	-1.18222826		18.00000000	1.90777778	17.34777894	0.404360
19	-0.11984447	9.09677790	-1.09019853		19.00000000	1.80736842	16.44122911	0.425857
20	-0.11005225	9.09364510	-1.00077610		20.00000000	1.71700000	15.61378864	0.447237
21	-0.09989832	9.09384060	-0.90845936		21.00000000	1.63523810	14.87059458	0.468584
22	-0.09004805	9.11030770	-0.82036540		22.00000000	1.56090909	14.22036211	0.489956
23	-0.07991719	9.09263900	-0.72665818		23.00000000	1.49304348	13.57570536	0.511440
24	-0.07011306	9.09294410	-0.63753416		24.00000000	1.43083333	13.01048752	0.532819
25	-0.05997774	9.09114840	-0.54526657		25.00000000	1.37360000	12.48760144	0.554156
26	-0.04979181	9.08959290	-0.45258727		26.00000000	1.32076923	12.00525462	0.575547
27	-0.03999290	9.09885410	-0.36388952		27.00000000	1.27185185	11.57239444	0.597021
28	-0.02986501	9.09916590	-0.27174671		28.00000000	1.22642857	11.15947704	0.618399
29	-0.02004005	9.08670620	-0.18209803		29.00000000	1.18413793	10.75991348	0.639759
30	-0.00989728	9.09428600	-0.09000872		30.00000000	1.14466667	10.40992604	0.661140
31	-0.00063870	9.08889580	-0.00580506		31.00000000	1.10774194	10.06815102	0.682737
32	0.00952544	9.08791450	0.08656640		32.00000000	1.07312500	9.75246825	0.704127
33	0.01930994	9.09976010	0.17571582		33.00000000	1.04060606	9.46926551	0.725487
34	0.02946358	9.07086470	0.26726013		34.00000000	1.01000000	9.16157335	0.746915
35	0.03930315	9.10931780	0.35802488		35.00000000	0.98114286	8.93754209	0.768410
36	0.04938906	9.07850650	0.44837894		36.00000000	0.95388889	8.65988648	0.789780
37	0.05928445	9.10193820	0.53960342		37.00000000	0.92810811	8.44758264	0.811149
38	0.06941874	9.09993550	0.63170608		38.00000000	0.90368421	8.22346803	0.832523
39	0.07953443	9.08616830	0.72266318		39.00000000	0.88051282	8.00048768	0.854011
40	0.08940079	9.09715180	0.81329257		40.00000000	0.85850000	7.80990482	0.875402
41	0.09952615	9.09895230	0.90558365		41.00000000	0.83756098	7.62092737	0.896773
42	0.10936051	9.09990690	0.99517046		42.00000000	0.81761905	7.44025721	0.918147
43	0.11948289	9.09318830	1.08648042		43.00000000	0.79860465	7.26186247	0.939637
44	0.12933140	9.09489350	1.17625531		44.00000000	0.78045455	7.09815097	0.961015
45	0.13947462	9.09691620	1.26878893		45.00000000	0.76311111	6.94195783	0.982398
46	0.14928070	9.09277440	1.35737573		46.00000000	0.74652174	6.78795376	1.003747
47	0.15946038	9.09918120	1.45095889		47.00000000	0.73063830	6.64821026	1.025218
48	0.16961551	9.09348010	1.54239526		48.00000000	0.71541667	6.50562722	1.046599
49	0.17937768	9.09376720	1.63121886		49.00000000	0.70081633	6.37306052	1.067983
50	0.18952982	9.08708480	1.72227355		50.00000000	0.68680000	6.24100984	1.089466
51	0.19937015	9.09714030	1.81369823		51.00000000	0.67333333	6.12540780	1.110863
52	0.20948657	9.08933260	1.90409311		52.00000000	0.66038462	6.00245541	1.132204
53	0.21930902	9.09132860	1.99381037		53.00000000	0.64792453	5.89049479	1.153579
54	0.22944331	9.08516220	2.08452969		54.00000000	0.63592593	5.77749018	1.175058
55	0.23926874	9.10107520	2.17760280		55.00000000	0.62436364	5.68238041	1.196441
56	0.24942313	9.09200950	2.26775747		56.00000000	0.61321429	5.57535011	1.217812
57	0.25958198	9.09060290	2.35975670		57.00000000	0.60245614	5.47668954	1.239201
58	0.26941708	9.08577160	2.44786205		58.00000000	0.59206897	5.37940339	1.260688
59	0.27954394	9.08996390	2.54104432		59.00000000	0.58203390	5.29066712	1.282071
60	0.28935894	9.09621240	2.63207038		60.00000000	0.57233333	5.20606556	1.303421
61	0.29950365	9.09345150	2.72352192		61.00000000	0.56295082	5.11916598	1.324804
62	0.30928293	9.07682610	2.80730737		62.00000000	0.55387097	5.02739046	1.346272
63	0.31945890	9.09380250	2.90509614		63.00000000	0.54507937	4.95684409	1.367651
64	0.32930517	9.10833640	2.99942227		64.00000000	0.53656250	4.88719175	1.388995
65	0.33944392	9.08131030	3.08259557		65.00000000	0.52830769	4.79772609	1.410383
66	0.34921429	9.09670640	3.17669987		66.00000000	0.52030303	4.73304391	1.431872
67	0.35939619	9.08920100	3.26662421		67.00000000	0.51253731	4.65855466	1.453244
68	0.36956918	9.09336660	3.36062804		68.00000000	0.50500000	4.59215013	1.474614
69	0.37934774	9.06825160	3.44002075		69.00000000	0.49768116	4.51309797	1.495991
70	0.38954082	9.09668920	3.54353177		70.00000000	0.49057143	4.46257582	1.517468
71	0.39934391	9.06759360	3.62108828		71.00000000	0.48366197	4.38565020	1.538863
72	0.40949905	9.08728980	3.72123654		72.00000000	0.47694444	4.33413239	1.560226
73	0.41932598	9.07780270	3.80655851		73.00000000	0.47041096	4.27029787	1.581594
74	0.42946175	9.08092020	3.89990788		74.00000000	0.46405405	4.21403783	1.603075
75	0.43925145	9.06433110	3.98152058		75.00000000	0.45786667	4.15025507	1.624445
76	0.44945124	9.07634540	4.07937469		76.00000000	0.45184211	4.10107501	1.645834
77	0.45956171	9.05272390	4.16028528		77.00000000	0.44597403	4.03727972	1.667180
78	0.46946156	9.05685140	4.25184359		78.00000000	0.44025641	3.98733689	1.688648
79	0.47958320	9.03568080	4.33336071		79.00000000	0.43468354	3.92766176	1.710039
80	0.48941681	9.03403190	4.42140707		80.00000000	0.42925000	3.87785819	1.731433
81	0.49951166	9.02318950	4.50718837		81.00000000	0.42395062	3.82538676	1.752917
82	0.50935721	8.99238300	4.58033512		82.00000000	0.41878049	3.76583454	1.774302
83	0.51950485	8.95834730	4.65390487		83.00000000	0.41373494	3.70638128	1.795647
84	0.52926183	8.93635180	4.72966991		84.00000000	0.40880952	3.65326572	1.817024
85	0.53939688	8.87961390	4.78963603		85.00000000	0.40400000	3.58736402	1.838507
86	0.54955792	8.80000400	4.83611189		86.00000000	0.39930233	3.51386206	1.859883
87	0.55937368	8.71057130	4.87246432		87.00000000	0.39471264	3.43817263	1.881279
88	0.56949383	8.57759000	4.88488458		88.00000000	0.39022727	3.34720955	1.902656
89	0.57932824	8.38543610	4.85791994		89.00000000	0.38584270	3.23545928	1.924134
90	0.58943945	8.12033460	4.78644556		90.00000000	0.38155556	3.09835878	1.945513
91	0.59926188	7.78452010	4.66496615		91.00000000	0.37736264	2.93758704	1.966872
92	0.60934854	7.30439330	4.45092139		92.00000000	0.37326087	2.72644419	1.988336
93	0.61913306	6.69176580	4.14309344		93.00000000	0.36924731	2.47091653	2.009842
94	0.62928295	5.86687610	3.69192510		94.00000000	0.36531915	2.14328218	2.031220
95	0.63938004	4.80726720	3.07367069		95.00000000	0.36147368	1.73770059	2.052569
96	0.64918315	3.49960470	2.27188440		96.00000000	0.35770833	1.25183776	2.073949
97	0.65928841	1.82897230	1.20582024		97.00000000	0.35402062	0.64749390	2.095432
98	0.66898882	-0.14854538	-0.09937520		98.00000000	0.35040816	-0.05205151	2.116810
99	0.67911714	-2.61080290	-1.77304100		99.00000000	0.34686869	-0.90560577	2.138154
100	0.68882126	-5.43507100	-3.74379245		100.00000000	0.34340000	-1.86640338	2.159543
101	0.69907165	-8.87463090	-6.20400287		101.00000000	0.34000000	-3.01737451	2.181044
