# Supplementary material for: Study on the Electrical Injection Regeneration of Industrialized B-Doped Czochralski Silicon PERC Solar Cells
Source: Hindawi journal article supplement (doi:10.1155/2019/5357370), 2019-06-20
Supplement: f1 [file 5357370.f1.zip › section3.3/IVRawData_3-12-2h.csv]

00:13 04/04/2018
Test Lot:	JK-PERC
Recipe:	Recipe_YJX-LID
Cell Name:	3-12-2h
Test Order:	2
Test Condition:	Light
1	-0.29990146	9.09422680	-2.72737189		1.00000000	34.34000000	312.29574831	0.000000
2	-0.29010111	9.10331730	-2.64088245		2.00000000	17.17000000	156.30395804	0.061815
3	-0.27997705	9.10588930	-2.54944002		3.00000000	11.44666667	104.23207952	0.083225
4	-0.27015960	9.09220790	-2.45634725		4.00000000	8.58500000	78.05660482	0.104711
5	-0.25999534	9.09937860	-2.36579603		5.00000000	6.86800000	62.49453222	0.126091
6	-0.24985042	9.09584900	-2.27260169		6.00000000	5.72333333	52.05857578	0.147464
7	-0.24002255	9.10322090	-2.18497829		7.00000000	4.90571429	44.65780082	0.168830
8	-0.22983745	9.10225960	-2.09204014		8.00000000	4.29250000	39.07144933	0.190349
9	-0.22002892	9.10981660	-2.00442311		9.00000000	3.81555556	34.75901134	0.211736
10	-0.20987582	9.09498120	-1.90881664		10.00000000	3.43400000	31.23216544	0.233125
11	-0.20007104	9.11669060	-1.82398577		11.00000000	3.12181818	28.46065047	0.254613
12	-0.18991941	9.09888650	-1.72805516		12.00000000	2.86166667	26.03798020	0.275988
13	-0.18013026	9.08725260	-1.63688917		13.00000000	2.64153846	24.00432725	0.297350
14	-0.16998905	9.09563060	-1.54615760		14.00000000	2.45285714	22.31028249	0.318729
15	-0.16018352	9.09864140	-1.45745241		15.00000000	2.28933333	20.82982305	0.340199
16	-0.15004307	9.10722260	-1.36647564		16.00000000	2.14625000	19.54637651	0.361586
17	-0.13987954	9.08956050	-1.27144354		17.00000000	2.02000000	18.36091221	0.382934
18	-0.13005316	9.09578420	-1.18293548		18.00000000	1.90777778	17.35273497	0.404302
19	-0.11989708	9.09578040	-1.09055751		19.00000000	1.80736842	16.43942626	0.425799
20	-0.11010271	9.10190200	-1.00214408		20.00000000	1.71700000	15.62796573	0.447171
21	-0.09993324	9.09127620	-0.90852066		21.00000000	1.63523810	14.86640118	0.468511
22	-0.09013588	9.10015010	-0.82025004		22.00000000	1.56090909	14.20450702	0.489895
23	-0.07996864	9.10009480	-0.72772220		23.00000000	1.49304348	13.58683719	0.511371
24	-0.07016756	9.08768460	-0.63766069		24.00000000	1.43083333	13.00296205	0.532757
25	-0.06001893	9.11617180	-0.54714285		25.00000000	1.37360000	12.52197358	0.554106
26	-0.04985094	9.09951590	-0.45361939		26.00000000	1.32076923	12.01836062	0.575477
27	-0.04005359	9.10098930	-0.36452727		27.00000000	1.27185185	11.57511009	0.596951
28	-0.02993546	9.10779190	-0.27264598		28.00000000	1.22642857	11.17005621	0.618325
29	-0.02005848	9.09804530	-0.18249293		29.00000000	1.18413793	10.77334054	0.639667
30	-0.00993142	9.10517310	-0.09042732		30.00000000	1.14466667	10.42238814	0.661036
31	-0.00070566	9.10134120	-0.00642243		31.00000000	1.10774194	10.08193732	0.682624
32	0.00948147	9.10802080	0.08635746		32.00000000	1.07312500	9.77404482	0.704002
33	0.01931948	9.10528180	0.17590929		33.00000000	1.04060606	9.47501142	0.725370
34	0.02945220	9.09301190	0.26780920		34.00000000	1.01000000	9.18394202	0.746726
35	0.03924108	9.10356620	0.35723380		35.00000000	0.98114286	8.93189895	0.768208
36	0.04939167	9.08807370	0.44887509		36.00000000	0.95388889	8.66901252	0.789595
37	0.05921628	9.11455630	0.53973008		37.00000000	0.92810811	8.45929360	0.810979
38	0.06938472	9.09078880	0.63076180		38.00000000	0.90368421	8.21520230	0.832320
39	0.07955093	9.10627650	0.72441276		39.00000000	0.88051282	8.01819321	0.853794
40	0.08935396	9.09352780	0.81254268		40.00000000	0.85850000	7.80679362	0.875167
41	0.09952314	9.09248160	0.90491234		41.00000000	0.83756098	7.61550776	0.896550
42	0.10932393	9.10177520	0.99504183		42.00000000	0.81761905	7.44178477	0.918036
43	0.11946410	9.10539720	1.08776808		43.00000000	0.79860465	7.27161255	0.939417
44	0.12928945	9.09699060	1.17614491		44.00000000	0.78045455	7.09978766	0.960775
45	0.13942589	9.10460570	1.26941775		45.00000000	0.76311111	6.94782577	0.982148
46	0.14929366	9.10848620	1.35983924		46.00000000	0.74652174	6.79968296	1.003629
47	0.15942341	9.09808730	1.45044810		47.00000000	0.73063830	6.64741102	1.025020
48	0.16958292	9.09832570	1.54292064		48.00000000	0.71541667	6.50909384	1.046378
49	0.17940901	9.09600450	1.63190516		49.00000000	0.70081633	6.37462846	1.067763
50	0.18954398	9.10132790	1.72510191		50.00000000	0.68680000	6.25079200	1.089246
51	0.19933063	9.09846400	1.81360256		51.00000000	0.67333333	6.12629909	1.110622
52	0.20946483	9.10153200	1.90645085		52.00000000	0.66038462	6.01051171	1.131972
53	0.21929093	9.08689880	1.99267449		53.00000000	0.64792453	5.88762462	1.153344
54	0.22941993	9.09863470	2.08740814		54.00000000	0.63592593	5.78605770	1.174822
55	0.23925644	9.09236150	2.17540604		55.00000000	0.62436364	5.67693989	1.196211
56	0.24940702	9.10236640	2.27019408		56.00000000	0.61321429	5.58170111	1.217555
57	0.25950775	9.09983630	2.36147804		57.00000000	0.60245614	5.48225226	1.238927
58	0.26935020	9.09450720	2.44960733		58.00000000	0.59206897	5.38457547	1.260393
59	0.27949858	9.07486920	2.53641306		59.00000000	0.58203390	5.28188150	1.281770
60	0.28934699	9.10212420	2.63367224		60.00000000	0.57233333	5.20944908	1.303116
61	0.29944250	9.10587120	2.72668484		61.00000000	0.56295082	5.12615766	1.324495
62	0.30928794	9.08406350	2.80959129		62.00000000	0.55387097	5.03139904	1.345977
63	0.31944448	9.08825870	2.90319407		63.00000000	0.54507937	4.95382228	1.367358
64	0.32926461	9.09554670	2.99484164		64.00000000	0.53656250	4.88032928	1.388736
65	0.33939511	9.09278010	3.08604510		65.00000000	0.52830769	4.80378567	1.410095
66	0.34922493	9.10058020	3.17814948		66.00000000	0.52030303	4.73505946	1.431588
67	0.35938221	9.08823200	3.26614890		67.00000000	0.51253731	4.65805801	1.452974
68	0.36954245	9.10400680	3.36431698		68.00000000	0.50500000	4.59752343	1.474358
69	0.37934178	9.08885960	3.44778418		69.00000000	0.49768116	4.52335418	1.495709
70	0.38948938	9.09161850	3.54108885		70.00000000	0.49057143	4.46008828	1.517186
71	0.39932886	9.09835240	3.63323469		71.00000000	0.48366197	4.40052706	1.538561
72	0.40944448	9.07702350	3.71653717		72.00000000	0.47694444	4.32923593	1.559949
73	0.41931224	9.08900170	3.81112966		73.00000000	0.47041096	4.27556601	1.581429
74	0.42944422	9.08009820	3.89939569		74.00000000	0.46405405	4.21365638	1.602795
75	0.43928146	9.08600620	3.99131407		75.00000000	0.45786667	4.16017937	1.624148
76	0.44942909	9.06976220	4.07621497		76.00000000	0.45184211	4.09810045	1.645517
77	0.45955512	9.07277490	4.16944016		77.00000000	0.44597403	4.04622195	1.667029
78	0.46942660	9.06051830	4.25324830		78.00000000	0.44025641	3.98895126	1.688420
79	0.47957197	9.05676650	4.34337135		79.00000000	0.43468354	3.93682736	1.709769
80	0.48938468	9.03713700	4.42263640		80.00000000	0.42925000	3.87919106	1.731138
81	0.49950773	9.02694130	4.50902696		81.00000000	0.42395062	3.82697734	1.752628
82	0.50934052	9.00244050	4.58530773		82.00000000	0.41878049	3.77004642	1.774008
83	0.51945168	8.97298530	4.66103229		83.00000000	0.41373494	3.71243753	1.795375
84	0.52927178	8.93989560	4.73163446		84.00000000	0.40880952	3.65471446	1.816751
85	0.53941047	8.88614560	4.79327997		85.00000000	0.40400000	3.59000282	1.838227
86	0.54954094	8.80437850	4.83836644		86.00000000	0.39930233	3.51560881	1.859617
87	0.55935663	8.71639820	4.87557512		87.00000000	0.39471264	3.44047258	1.880973
88	0.56947893	8.57628150	4.88401161		88.00000000	0.39022727	3.34669894	1.902348
89	0.57931173	8.40731240	4.87045469		89.00000000	0.38584270	3.24390009	1.923854
90	0.58940727	8.13356210	4.79398063		90.00000000	0.38155556	3.10340581	1.945227
91	0.59921771	7.78367810	4.66411777		91.00000000	0.37736264	2.93726930	1.966567
92	0.60932213	7.32192990	4.46141392		92.00000000	0.37326087	2.73298992	1.988055
93	0.61914080	6.70798210	4.15318540		93.00000000	0.36924731	2.47690436	2.009563
94	0.62922889	5.88945870	3.70581756		94.00000000	0.36531915	2.15153204	2.030941
95	0.63936234	4.82445290	3.08457350		95.00000000	0.36147368	1.74391276	2.052310
96	0.64915794	3.51876210	2.28423236		96.00000000	0.35770833	1.25869053	2.073673
97	0.65923405	1.84927940	1.21910795		97.00000000	0.35402062	0.65468304	2.095147
98	0.66896415	-0.13608496	-0.09103596		98.00000000	0.35040816	-0.04768528	2.116519
99	0.67907310	-2.57266970	-1.74703079		99.00000000	0.34686869	-0.89237856	2.137903
100	0.68877637	-5.40818830	-3.72503231		100.00000000	0.34340000	-1.85717186	2.159251
101	0.69909662	-8.87216380	-6.20249972		101.00000000	0.34000000	-3.01653569	2.180773
00:13 04/04/2018
Test Lot:	JK-PERC
Recipe:	Recipe_YJX-LID
Cell Name:	3-12-2h
Test Order:	3
Test Condition:	Light
1	-0.29991329	9.09803490	-2.72862158		1.00000000	34.34000000	312.42651847	0.000000
2	-0.29012474	9.10060120	-2.64030956		2.00000000	17.17000000	156.25732260	0.061817
3	-0.27999088	9.09416100	-2.54628214		3.00000000	11.44666667	104.09782958	0.083224
4	-0.27017257	9.10783960	-2.46068843		4.00000000	8.58500000	78.19080297	0.104620
5	-0.26002157	9.09304330	-2.36438739		5.00000000	6.86800000	62.45102138	0.126108
6	-0.24984081	9.09777450	-2.27299535		6.00000000	5.72333333	52.06959606	0.147505
7	-0.24003813	9.09503750	-2.18315579		7.00000000	4.90571429	44.61765539	0.168885
8	-0.22987150	9.09374900	-2.09039372		8.00000000	4.29250000	39.03491758	0.190228
9	-0.22006063	9.09981540	-2.00251111		9.00000000	3.81555556	34.72085120	0.211700
10	-0.20990965	9.09657960	-1.90945984		10.00000000	3.43400000	31.23765435	0.233078
11	-0.20005785	9.09921650	-1.82036969		11.00000000	3.12181818	28.40609951	0.254460
12	-0.18996787	9.08961870	-1.72673550		12.00000000	2.86166667	26.01145885	0.275891
13	-0.18015404	9.10976410	-1.64116081		13.00000000	2.64153846	24.06379225	0.297351
14	-0.17001197	9.10545440	-1.54803624		14.00000000	2.45285714	22.33437886	0.318716
15	-0.16019665	9.09769250	-1.45741986		15.00000000	2.28933333	20.82765070	0.340119
16	-0.15004863	9.09679510	-1.36496164		16.00000000	2.14625000	19.52399648	0.361477
17	-0.13988051	9.09168620	-1.27174970		17.00000000	2.02000000	18.36520612	0.382956
18	-0.13005252	9.10086540	-1.18359048		18.00000000	1.90777778	17.36242877	0.404337
19	-0.11990451	9.09697150	-1.09076791		19.00000000	1.80736842	16.44157902	0.425698
20	-0.11009067	9.09785270	-1.00158870		20.00000000	1.71700000	15.62101309	0.447060
21	-0.09992553	9.10457040	-0.90977905		21.00000000	1.63523810	14.88814036	0.468538
22	-0.09009086	9.09213350	-0.81911809		22.00000000	1.56090909	14.19199384	0.489912
23	-0.07994135	9.08646970	-0.72638463		23.00000000	1.49304348	13.56649433	0.511307
24	-0.07015058	9.10699370	-0.63886086		24.00000000	1.43083333	13.03059015	0.532658
25	-0.05997056	9.09373090	-0.54535612		25.00000000	1.37360000	12.49114876	0.554131
26	-0.04980245	9.09981540	-0.45319306		26.00000000	1.32076923	12.01875619	0.575517
27	-0.04002582	9.10943700	-0.36461264		27.00000000	1.27185185	11.58585432	0.596907
28	-0.02987333	9.09613900	-0.27173200		28.00000000	1.22642857	11.15576476	0.618378
29	-0.02007289	9.09601690	-0.18258332		29.00000000	1.18413793	10.77093863	0.639773
30	-0.00989659	9.09033970	-0.08996335		30.00000000	1.14466667	10.40540884	0.661124
31	-0.00062755	9.09247210	-0.00570594		31.00000000	1.10774194	10.07211264	0.682621
32	0.00949198	9.10516740	0.08642608		32.00000000	1.07312500	9.77098277	0.704097
33	0.01933085	9.08810140	0.17568071		33.00000000	1.04060606	9.45713340	0.725477
34	0.02941978	9.10617730	0.26790175		34.00000000	1.01000000	9.19723907	0.746832
35	0.03926088	9.10263730	0.35737758		35.00000000	0.98114286	8.93098757	0.768209
36	0.04943391	9.09726520	0.44971342		36.00000000	0.95388889	8.67778019	0.789685
37	0.05919836	9.08939170	0.53807705		37.00000000	0.92810811	8.43593813	0.811077
38	0.06938553	9.09416770	0.63100364		38.00000000	0.90368421	8.21825576	0.832428
39	0.07952061	9.09417150	0.72317403		39.00000000	0.88051282	8.00753460	0.853801
40	0.08935426	9.10805510	0.81384354		40.00000000	0.85850000	7.81926530	0.875280
41	0.09949826	9.09158800	0.90459722		41.00000000	0.83756098	7.61475932	0.896665
42	0.10930365	9.09160800	0.99374594		42.00000000	0.81761905	7.43347187	0.918007
43	0.11946774	9.09525110	1.08658909		43.00000000	0.79860465	7.26350983	0.939387
44	0.12929916	9.08959480	1.17527697		44.00000000	0.78045455	7.09401558	0.960865
45	0.13942085	9.10694030	1.26969736		45.00000000	0.76311111	6.94960733	0.982248
46	0.14925674	9.08523750	1.35603293		46.00000000	0.74652174	6.78232730	1.003602
47	0.15939851	9.11844540	1.45346661		47.00000000	0.73063830	6.66228543	1.024978
48	0.16956261	9.08948140	1.54123619		48.00000000	0.71541667	6.50276648	1.046451
49	0.17937097	9.09629920	1.63161201		49.00000000	0.70081633	6.37483499	1.067830
50	0.18953730	9.08700850	1.72232706		50.00000000	0.68680000	6.24095744	1.089190
51	0.19929728	9.09556670	1.81272170		51.00000000	0.67333333	6.12434824	1.110561
52	0.20948370	9.09692480	1.90565747		52.00000000	0.66038462	6.00746919	1.132040
53	0.21929280	9.08898070	1.99314803		53.00000000	0.64792453	5.88897353	1.153415
54	0.22945021	9.09512620	2.08687862		54.00000000	0.63592593	5.78382655	1.174799
55	0.23927642	9.09980680	2.17736919		55.00000000	0.62436364	5.68158846	1.196144
56	0.24942712	9.09382060	2.26824548		56.00000000	0.61321429	5.57646070	1.217618
57	0.25953987	9.10047820	2.36193693		57.00000000	0.60245614	5.48263897	1.238999
58	0.26939213	9.09757230	2.45081438		58.00000000	0.59206897	5.38639022	1.260384
59	0.27949968	9.08957860	2.54053431		59.00000000	0.58203390	5.29044287	1.281865
60	0.28931546	9.09340860	2.63086369		60.00000000	0.57233333	5.20446086	1.303230
61	0.29951009	9.08938120	2.72236138		61.00000000	0.56295082	5.11687460	1.324571
62	0.30930653	9.10212040	2.81534528		62.00000000	0.55387097	5.04140023	1.345944
63	0.31947732	9.09602550	2.90597385		63.00000000	0.54507937	4.95805580	1.367426
64	0.32928717	9.09259220	2.99407395		64.00000000	0.53656250	4.87874400	1.388800
65	0.33944309	9.09834190	3.08836929		65.00000000	0.52830769	4.80672401	1.410166
66	0.34925738	9.09047600	3.17491583		66.00000000	0.52030303	4.72980221	1.431543
67	0.35939395	9.08611200	3.26549368		67.00000000	0.51253731	4.65697143	1.453022
68	0.36953574	9.09300990	3.36019214		68.00000000	0.50500000	4.59197000	1.474403
69	0.37935451	9.08906460	3.44797765		69.00000000	0.49768116	4.52345621	1.495748
70	0.38950595	9.07195470	3.53358033		70.00000000	0.49057143	4.45044178	1.517132
71	0.39930537	9.09833050	3.63301223		71.00000000	0.48366197	4.40051647	1.538621
72	0.40948138	9.08406930	3.71975723		72.00000000	0.47694444	4.33259639	1.560007
73	0.41929644	9.07943820	3.80697611		73.00000000	0.47041096	4.27106723	1.581351
74	0.42943224	9.08317180	3.90060681		74.00000000	0.46405405	4.21508270	1.602732
75	0.43926069	9.06855680	3.98346052		75.00000000	0.45786667	4.15218987	1.624205
76	0.44942704	9.06974890	4.07619040		76.00000000	0.45184211	4.09809444	1.645583
77	0.45957923	9.06532100	4.16623324		77.00000000	0.44597403	4.04289770	1.666933
78	0.46940172	9.05506420	4.25046271		78.00000000	0.44025641	3.98655006	1.688305
79	0.47957399	9.04631040	4.33837517		79.00000000	0.43468354	3.93228227	1.709778
80	0.48937938	9.04470540	4.42629232		80.00000000	0.42925000	3.88243979	1.731156
81	0.49950328	9.01663110	4.50383681		81.00000000	0.42395062	3.82260632	1.752507
82	0.50933772	9.00040250	4.58424449		82.00000000	0.41878049	3.76919295	1.773881
83	0.51947278	8.96886060	4.65907895		83.00000000	0.41373494	3.71073100	1.795368
84	0.52928114	8.93768020	4.73054557		84.00000000	0.40880952	3.65380879	1.816743
85	0.53941101	8.87502480	4.78728609		85.00000000	0.40400000	3.58551002	1.838135
86	0.54955131	8.81298540	4.84318767		86.00000000	0.39930233	3.51904557	1.859484
87	0.55936635	8.70714570	4.87048431		87.00000000	0.39471264	3.43682050	1.880960
88	0.56948948	8.59800620	4.89647408		88.00000000	0.39022727	3.35517651	1.902347
89	0.57929116	8.38062290	4.85482076		89.00000000	0.38584270	3.23360214	1.923734
90	0.58942920	8.13692380	4.79614049		90.00000000	0.38155556	3.10468848	1.945221
91	0.59924275	7.77910470	4.66157209		91.00000000	0.37736264	2.93554347	1.966596
92	0.60933614	7.32511230	4.46345565		92.00000000	0.37326087	2.73417779	1.988041
93	0.61916608	6.69998120	4.14840110		93.00000000	0.36924731	2.47395005	2.009455
94	0.62926620	5.87811140	3.69889682		94.00000000	0.36531915	2.14738665	2.030982
95	0.63939607	4.82438990	3.08469594		95.00000000	0.36147368	1.74388999	2.052371
96	0.64917988	3.51921870	2.28460597		96.00000000	0.35770833	1.25885386	2.073733
97	0.65926212	1.84923620	1.21913138		97.00000000	0.35402062	0.65466774	2.095114
98	0.66898859	-0.11924620	-0.07977435		98.00000000	0.35040816	-0.04178484	2.116594
99	0.67907900	-2.58527990	-1.75560929		99.00000000	0.34686869	-0.89675264	2.137981
100	0.68881738	-5.39891860	-3.71886896		100.00000000	0.34340000	-1.85398865	2.159346
101	0.69908196	-8.83948900	-6.17952730		101.00000000	0.34000000	-3.00542626	2.180711
00:13 04/04/2018
Test Lot:	JK-PERC
Recipe:	Recipe_YJX-LID
Cell Name:	3-12-2h
Test Order:	4
Test Condition:	Light
1	-0.29992706	9.09369750	-2.72744596		1.00000000	34.34000000	312.27757215	0.000000
2	-0.29006422	9.08383080	-2.63489430		2.00000000	17.17000000	155.96937484	0.061790
3	-0.27995276	9.11184020	-2.55088481		3.00000000	11.44666667	104.30019749	0.083208
4	-0.27011821	9.10126590	-2.45841765		4.00000000	8.58500000	78.13436775	0.104698
5	-0.25991967	9.08912940	-2.36244351		5.00000000	6.86800000	62.42414072	0.126063
6	-0.24977773	9.09308820	-2.27125093		6.00000000	5.72333333	52.04277480	0.147454
7	-0.23994613	9.09378720	-2.18201905		7.00000000	4.90571429	44.61152178	0.168818
8	-0.22981460	9.10938360	-2.09346935		8.00000000	4.29250000	39.10202910	0.190296
9	-0.21997036	9.08518790	-1.99847205		9.00000000	3.81555556	34.66503917	0.211731
10	-0.20985520	9.10482220	-1.91069428		10.00000000	3.43400000	31.26595943	0.233128
11	-0.20001541	9.10193820	-1.82052790		11.00000000	3.12181818	28.41459616	0.254488
12	-0.18986006	9.10221860	-1.72814777		12.00000000	2.86166667	26.04751556	0.275964
13	-0.18007982	9.09386060	-1.63762078		13.00000000	2.64153846	24.02178254	0.297342
14	-0.16994829	9.10441020	-1.54727894		14.00000000	2.45285714	22.33181759	0.318722
15	-0.16011521	9.10435490	-1.45774570		15.00000000	2.28933333	20.84290315	0.340206
16	-0.14999038	9.09955880	-1.36484628		16.00000000	2.14625000	19.52992807	0.361590
17	-0.13982907	9.09867100	-1.27225870		17.00000000	2.02000000	18.37931542	0.382939
18	-0.13002427	9.07992360	-1.18061044		18.00000000	1.90777778	17.32247647	0.404311
19	-0.11982650	9.10226060	-1.09069203		19.00000000	1.80736842	16.45113837	0.425791
20	-0.11004031	9.09867100	-1.00122058		20.00000000	1.71700000	15.62241811	0.447178
21	-0.09989240	9.09256940	-0.90827858		21.00000000	1.63523810	14.86851587	0.468530
22	-0.09005486	9.09429450	-0.81898537		22.00000000	1.56090909	14.19536696	0.489904
23	-0.07991960	9.09153460	-0.72659180		23.00000000	1.49304348	13.57405644	0.511382
24	-0.07011703	9.09276770	-0.63755784		24.00000000	1.43083333	13.01023512	0.532776
25	-0.05999592	9.09394740	-0.54559973		25.00000000	1.37360000	12.49144615	0.554132
26	-0.04982197	9.09500890	-0.45313122		26.00000000	1.32076923	12.01240791	0.575497
27	-0.03999781	9.10645100	-0.36423812		27.00000000	1.27185185	11.58205657	0.596982
28	-0.02984395	9.08988760	-0.27127818		28.00000000	1.22642857	11.14809786	0.618360
29	-0.02003096	9.10953040	-0.18247266		29.00000000	1.18413793	10.78694048	0.639701
30	-0.00988008	9.10249610	-0.08993340		30.00000000	1.14466667	10.41932387	0.661075
31	-0.00064389	9.08222680	-0.00584794		31.00000000	1.10774194	10.06076349	0.682663
32	0.00950679	9.09982400	0.08651007		32.00000000	1.07312500	9.76524863	0.704059
33	0.01934778	9.10139940	0.17609184		33.00000000	1.04060606	9.47097138	0.725403
34	0.02949242	9.08721070	0.26800379		34.00000000	1.01000000	9.17808281	0.746778
35	0.03931554	9.09943680	0.35774931		35.00000000	0.98114286	8.92784742	0.768246
36	0.04947209	9.08734040	0.44956972		36.00000000	0.95388889	8.66831304	0.789621
37	0.05931680	9.10157970	0.53987661		37.00000000	0.92810811	8.44724992	0.810991
38	0.06947335	9.09004210	0.63151567		38.00000000	0.90368421	8.21452752	0.832356
39	0.07955696	9.11054130	0.72480694		39.00000000	0.88051282	8.02194842	0.853839
40	0.08938232	9.08600520	0.81212823		40.00000000	0.85850000	7.80033546	0.875214
41	0.09958054	9.10136410	0.90631876		41.00000000	0.83756098	7.62294739	0.896606
42	0.10936423	9.09803680	0.99499979		42.00000000	0.81761905	7.43872818	0.917954
43	0.11952376	9.09508230	1.08707843		43.00000000	0.79860465	7.26337503	0.939422
44	0.12935507	9.09263420	1.17617833		44.00000000	0.78045455	7.09638769	0.960814
45	0.13947961	9.09451480	1.26849938		45.00000000	0.76311111	6.94012529	0.982196
46	0.14928934	9.09030910	1.35708625		46.00000000	0.74652174	6.78611336	1.003683
47	0.15946747	9.09787270	1.45081474		47.00000000	0.73063830	6.64725422	1.025052
48	0.16961658	9.10083010	1.54365168		48.00000000	0.71541667	6.51088553	1.046404
49	0.17942929	9.10436340	1.63358946		49.00000000	0.70081633	6.38048651	1.067786
50	0.18957542	9.08875080	1.72300375		50.00000000	0.68680000	6.24215405	1.089261
51	0.19934645	9.09576320	1.81320810		51.00000000	0.67333333	6.12448055	1.110642
52	0.20951118	9.10477730	1.90755264		52.00000000	0.66038462	6.01265486	1.132001
53	0.21933283	9.10016630	1.99596523		53.00000000	0.64792453	5.89622096	1.153378
54	0.22947523	9.08424660	2.08460958		54.00000000	0.63592593	5.77690793	1.174863
55	0.23927826	9.10468200	2.17855247		55.00000000	0.62436364	5.68463236	1.196267
56	0.24944299	9.08661650	2.26659279		56.00000000	0.61321429	5.57204305	1.217622
57	0.25956455	9.11825850	2.36677666		57.00000000	0.60245614	5.49335082	1.238998
58	0.26940036	9.07961180	2.44605069		58.00000000	0.59206897	5.37575637	1.260487
59	0.27951744	9.10090350	2.54386125		59.00000000	0.58203390	5.29703434	1.281875
60	0.28936216	9.09560970	2.63192527		60.00000000	0.57233333	5.20572062	1.303232
61	0.29952466	9.09445190	2.72401261		61.00000000	0.56295082	5.11972915	1.324612
62	0.30935374	9.09732060	2.81429015		62.00000000	0.55387097	5.03874176	1.346084
63	0.31948647	9.08702180	2.90318052		63.00000000	0.54507937	4.95314807	1.367461
64	0.32925752	9.09381100	2.99420566		64.00000000	0.53656250	4.87939796	1.388800
65	0.33942968	9.09320350	3.08650315		65.00000000	0.52830769	4.80400936	1.410158
66	0.34925652	9.08496760	3.17298417		66.00000000	0.52030303	4.72693617	1.431632
67	0.35941011	9.08755110	3.26615774		67.00000000	0.51253731	4.65770903	1.453023
68	0.36957705	9.08709050	3.35838010		68.00000000	0.50500000	4.58898070	1.474386
69	0.37936670	9.09360690	3.44981164		69.00000000	0.49768116	4.52571683	1.495755
70	0.38952547	9.08352570	3.53826462		70.00000000	0.49057143	4.45611818	1.517230
71	0.39937764	9.08735370	3.62928587		71.00000000	0.48366197	4.39520741	1.538608
72	0.40954459	9.08003230	3.71867811		72.00000000	0.47694444	4.33067096	1.559993
73	0.41932902	9.06980040	3.80323051		73.00000000	0.47041096	4.26653350	1.581331
74	0.42948484	9.08354380	3.90124436		74.00000000	0.46405405	4.21525533	1.602857
75	0.43930274	9.05532740	3.97803014		75.00000000	0.45786667	4.14613257	1.624230
76	0.44945112	9.08035090	4.08117388		76.00000000	0.45184211	4.10288487	1.645604
77	0.45959872	9.06551270	4.16649803		77.00000000	0.44597403	4.04298320	1.667089
78	0.46947694	9.05145550	4.24944963		78.00000000	0.44025641	3.98496131	1.688474
79	0.47960371	9.05530550	4.34295811		79.00000000	0.43468354	3.93619229	1.709835
80	0.48943427	9.03275870	4.42094166		80.00000000	0.42925000	3.87731167	1.731210
81	0.49957743	9.01788710	4.50513286		81.00000000	0.42395062	3.82313880	1.752692
82	0.50938642	9.00240140	4.58570102		82.00000000	0.41878049	3.77003005	1.774073
83	0.51951838	8.97080710	4.66049917		83.00000000	0.41373494	3.71153634	1.795431
84	0.52931845	8.92805480	4.72578413		84.00000000	0.40880952	3.64987383	1.816809
85	0.53941697	8.88510890	4.79277852		85.00000000	0.40400000	3.58958400	1.838291
86	0.54957199	8.81351380	4.84366032		86.00000000	0.39930233	3.51925656	1.859682
87	0.55941153	8.71405510	4.87474290		87.00000000	0.39471264	3.43954773	1.881033
88	0.56952190	8.57418540	4.88318636		88.00000000	0.39022727	3.34588098	1.902403
89	0.57931381	8.39667030	4.86430706		89.00000000	0.38584270	3.23979391	1.923885
90	0.58942789	8.12935540	4.79166880		90.00000000	0.38155556	3.10180072	1.945268
91	0.59927708	7.78735260	4.66678193		91.00000000	0.37736264	2.93865592	1.966623
92	0.60939866	7.32390360	4.46317704		92.00000000	0.37326087	2.73372663	1.988100
93	0.61918980	6.70589350	4.15222086		93.00000000	0.36924731	2.47613315	2.009592
94	0.62926817	5.87313320	3.69577578		94.00000000	0.36531915	2.14556802	2.030980
95	0.63943815	4.83191820	3.08971283		95.00000000	0.36147368	1.74661127	2.052323
96	0.64921588	3.51422430	2.28149022		96.00000000	0.35770833	1.25706732	2.073708
97	0.65931362	1.86511550	1.22969605		97.00000000	0.35402062	0.66028934	2.095184
98	0.66902065	-0.12839046	-0.08589587		98.00000000	0.35040816	-0.04498907	2.116564
99	0.67911243	-2.57791920	-1.75069697		99.00000000	0.34686869	-0.89419945	2.137923
100	0.68879640	-5.40334940	-3.72180761		100.00000000	0.34340000	-1.85551018	2.159288
101	0.69910926	-8.86056610	-6.19450381		101.00000000	0.34000000	-3.01259247	2.180763
