# Supplementary material for: Study on the Electrical Injection Regeneration of Industrialized B-Doped Czochralski Silicon PERC Solar Cells
Source: Hindawi journal article supplement (doi:10.1155/2019/5357370), 2019-06-20
Supplement: f1 [file 5357370.f1.zip › section3.3/IVRawData_3-12-3h.csv]

01:19 04/04/2018
Test Lot:	JK-PERC
Recipe:	Recipe_YJX-LID
Cell Name:	3-12-3h
Test Order:	2
Test Condition:	Light
1	-0.29989061	9.10183530	-2.72955494		1.00000000	34.34000000	312.55702420	0.000000
2	-0.29009250	9.11571880	-2.64440166		2.00000000	17.17000000	156.51689180	0.061798
3	-0.27997804	9.12329580	-2.55432248		3.00000000	11.44666667	104.43132592	0.083232
4	-0.27016056	9.10155110	-2.45888014		4.00000000	8.58500000	78.13681619	0.104750
5	-0.25997841	9.12482740	-2.37225812		5.00000000	6.86800000	62.66931458	0.126137
6	-0.24983121	9.11783120	-2.27791880		6.00000000	5.72333333	52.18438723	0.147490
7	-0.23999959	9.09957030	-2.18389314		7.00000000	4.90571429	44.63989201	0.168857
8	-0.22986729	9.11229230	-2.09461794		8.00000000	4.29250000	39.11451470	0.190341
9	-0.22002079	9.11481570	-2.00544895		9.00000000	3.81555556	34.77808568	0.211713
10	-0.20988402	9.10432820	-1.91085300		10.00000000	3.43400000	31.26426304	0.233068
11	-0.20004645	9.11055660	-1.82253451		11.00000000	3.12181818	28.44150124	0.254437
12	-0.18992457	9.11454580	-1.73107619		12.00000000	2.86166667	26.08279190	0.275918
13	-0.18010709	9.11323740	-1.64135867		13.00000000	2.64153846	24.07296710	0.297290
14	-0.16995916	9.11453060	-1.54909796		14.00000000	2.45285714	22.35664149	0.318680
15	-0.16012008	9.11433030	-1.45938730		15.00000000	2.28933333	20.86574017	0.340027
16	-0.14999895	9.11954210	-1.36792174		16.00000000	2.14625000	19.57281723	0.361497
17	-0.13983315	9.10880090	-1.27371232		17.00000000	2.02000000	18.39977782	0.382877
18	-0.13002238	9.11629300	-1.18532211		18.00000000	1.90777778	17.39186120	0.404255
19	-0.11989156	9.10368060	-1.09145447		19.00000000	1.80736842	16.45370483	0.425795
20	-0.11007260	9.12258630	-1.00414679		20.00000000	1.71700000	15.66348068	0.447174
21	-0.09989043	9.10734940	-0.90973701		21.00000000	1.63523810	14.89268469	0.468521
22	-0.09008635	9.11473270	-0.82111298		22.00000000	1.56090909	14.22726913	0.489895
23	-0.07994214	9.10500430	-0.72787350		23.00000000	1.49304348	13.59416729	0.511378
24	-0.07013805	9.12339210	-0.63989695		24.00000000	1.43083333	13.05405353	0.532748
25	-0.05995886	9.10459230	-0.54590101		25.00000000	1.37360000	12.50606798	0.554097
26	-0.04980572	9.11571690	-0.45401487		26.00000000	1.32076923	12.03975840	0.575475
27	-0.04002918	9.10912130	-0.36463062		27.00000000	1.27185185	11.58545279	0.596960
28	-0.02989390	9.11598590	-0.27251236		28.00000000	1.22642857	11.18010556	0.618357
29	-0.02004293	9.11701390	-0.18273165		29.00000000	1.18413793	10.79580198	0.639706
30	-0.00993444	9.10359380	-0.09043913		30.00000000	1.14466667	10.42058037	0.661071
31	-0.00065878	9.11989780	-0.00600801		31.00000000	1.10774194	10.10249324	0.682671
32	0.00951871	9.10904500	0.08670637		32.00000000	1.07312500	9.77514392	0.704049
33	0.01932103	9.10863590	0.17598821		33.00000000	1.04060606	9.47850172	0.725401
34	0.02945974	9.11744980	0.26859767		34.00000000	1.01000000	9.20862430	0.746778
35	0.03928215	9.10912320	0.35782592		35.00000000	0.98114286	8.93735116	0.768248
36	0.04944914	9.11101060	0.45053162		36.00000000	0.95388889	8.69089178	0.789644
37	0.05923211	9.10556700	0.53934190		37.00000000	0.92810811	8.45095056	0.810996
38	0.06939910	9.10781290	0.63207398		38.00000000	0.90368421	8.23058671	0.832370
39	0.07951324	9.10582540	0.72403372		39.00000000	0.88051282	8.01779601	0.853840
40	0.08937585	9.10768130	0.81400672		40.00000000	0.85850000	7.81894440	0.875208
41	0.09949521	9.10316180	0.90572099		41.00000000	0.83756098	7.62445308	0.896574
42	0.10934069	9.12466720	0.99769741		42.00000000	0.81761905	7.46050171	0.917938
43	0.11946823	9.10429190	1.08767364		43.00000000	0.79860465	7.27072986	0.939416
44	0.12930553	9.10824200	1.17774606		44.00000000	0.78045455	7.10856887	0.960784
45	0.13946955	9.11173340	1.27080936		45.00000000	0.76311111	6.95326500	0.982174
46	0.14928898	9.10460850	1.35921772		46.00000000	0.74652174	6.79678817	1.003524
47	0.15944555	9.11223600	1.45290548		47.00000000	0.73063830	6.65774860	1.024981
48	0.16959319	9.10653500	1.54440632		48.00000000	0.71541667	6.51496691	1.046358
49	0.17942825	9.11097050	1.63476549		49.00000000	0.70081633	6.38511688	1.067744
50	0.18953124	9.10622600	1.72591431		50.00000000	0.68680000	6.25415602	1.089235
51	0.19932388	9.11456870	1.81675120		51.00000000	0.67333333	6.13714292	1.110610
52	0.20949087	9.10486220	1.90738550		52.00000000	0.66038462	6.01271092	1.131963
53	0.21930212	9.11961560	1.99995103		53.00000000	0.64792453	5.90882264	1.153339
54	0.22945200	9.09374620	2.08657825		54.00000000	0.63592593	5.78294897	1.174812
55	0.23926398	9.11281490	2.18036836		55.00000000	0.62436364	5.68971025	1.196202
56	0.24941981	9.11005970	2.27222936		56.00000000	0.61321429	5.58641875	1.217562
57	0.25955629	9.10837550	2.36413615		57.00000000	0.60245614	5.48739675	1.238942
58	0.26939136	9.10383130	2.45249350		58.00000000	0.59206897	5.39009598	1.260421
59	0.27948838	9.11015320	2.54618196		59.00000000	0.58203390	5.30241798	1.281803
60	0.28933460	9.09510610	2.63152889		60.00000000	0.57233333	5.20543239	1.303156
61	0.29951203	9.11973760	2.73147112		61.00000000	0.56295082	5.13396376	1.324530
62	0.30931360	9.10573390	2.81652733		62.00000000	0.55387097	5.04340165	1.346024
63	0.31945232	9.10397820	2.90828696		63.00000000	0.54507937	4.96239066	1.367400
64	0.32924494	9.10065560	2.99634481		64.00000000	0.53656250	4.88307052	1.388758
65	0.33943501	9.10764980	3.09145520		65.00000000	0.52830769	4.81164145	1.410138
66	0.34924552	9.09960750	3.17799715		66.00000000	0.52030303	4.73455336	1.431619
67	0.35938793	9.09473230	3.26853702		67.00000000	0.51253731	4.66138966	1.453003
68	0.36956310	9.11447910	3.36837515		68.00000000	0.50500000	4.60281195	1.474343
69	0.37934980	9.10011480	3.45212673		69.00000000	0.49768116	4.52895568	1.495719
70	0.38953465	9.09019090	3.54094433		70.00000000	0.49057143	4.45938794	1.517185
71	0.39935410	9.09719750	3.63300312		71.00000000	0.48366197	4.39996848	1.538555
72	0.40948164	9.08917810	3.72185155		72.00000000	0.47694444	4.33503300	1.559945
73	0.41928694	9.10040470	3.81568084		73.00000000	0.47041096	4.28093010	1.581317
74	0.42947105	9.08284000	3.90081683		74.00000000	0.46405405	4.21492872	1.602801
75	0.43926069	9.08935640	3.99259696		75.00000000	0.45786667	4.16171332	1.624173
76	0.44944182	9.07940670	4.08066507		76.00000000	0.45184211	4.10245824	1.645568
77	0.45959544	9.08236600	4.17421400		77.00000000	0.44597403	4.05049933	1.666913
78	0.46945876	9.06160260	4.25404872		78.00000000	0.44025641	3.98942863	1.688379
79	0.47958559	9.06893440	4.34933025		79.00000000	0.43468354	3.94211655	1.709738
80	0.48937896	9.04390430	4.42589648		80.00000000	0.42925000	3.88209592	1.731121
81	0.49950948	9.04057120	4.51585102		81.00000000	0.42395062	3.83275574	1.752606
82	0.50935048	9.01007560	4.58928633		82.00000000	0.41878049	3.77324385	1.773986
83	0.51948178	8.99288750	4.67164121		83.00000000	0.41373494	3.72067177	1.795335
84	0.52926326	8.94502160	4.73427129		84.00000000	0.40880952	3.65681002	1.816720
85	0.53939378	8.89877130	4.79994189		85.00000000	0.40400000	3.59510361	1.838202
86	0.54955184	8.81648920	4.84511786		86.00000000	0.39930233	3.52044464	1.859590
87	0.55934596	8.73226930	4.88435955		87.00000000	0.39471264	3.44673710	1.880955
88	0.56950027	8.58398530	4.88858195		88.00000000	0.39022727	3.34970517	1.902333
89	0.57929516	8.41341500	4.87385059		89.00000000	0.38584270	3.24625473	1.923815
90	0.58940041	8.13589570	4.79530026		90.00000000	0.38155556	3.10429620	1.945203
91	0.59922653	7.79827790	4.67293501		91.00000000	0.37736264	2.94277872	1.966556
92	0.60934144	7.31099840	4.45489429		92.00000000	0.37326087	2.72890962	1.988088
93	0.61912584	6.72292950	4.16233937		93.00000000	0.36924731	2.48242365	2.009602
94	0.62925345	5.88179250	3.70113822		94.00000000	0.36531915	2.14873143	2.030978
95	0.63936460	4.81776910	3.08031101		95.00000000	0.36147368	1.74149675	2.052326
96	0.64916468	3.51464300	2.28158210		96.00000000	0.35770833	1.25721709	2.073699
97	0.65925574	1.82937590	1.20602656		97.00000000	0.35402062	0.64763679	2.095213
98	0.66894865	-0.16394763	-0.10967255		98.00000000	0.35040816	-0.05744859	2.116610
99	0.67907321	-2.62351510	-1.78155882		99.00000000	0.34686869	-0.91001524	2.137958
100	0.68878549	-5.47099690	-3.76834328		100.00000000	0.34340000	-1.87874034	2.159329
101	0.69903809	-8.93790910	-6.24793891		101.00000000	0.34000000	-3.03888909	2.180805
01:19 04/04/2018
Test Lot:	JK-PERC
Recipe:	Recipe_YJX-LID
Cell Name:	3-12-3h
Test Order:	3
Test Condition:	Light
1	-0.29989216	9.10744670	-2.73125186		1.00000000	34.34000000	312.74971968	0.000000
2	-0.29011172	9.10369300	-2.64108803		2.00000000	17.17000000	156.31040881	0.061793
3	-0.27999485	9.10914520	-2.55051374		3.00000000	11.44666667	104.26934872	0.083215
4	-0.27017492	9.10711770	-2.46051480		4.00000000	8.58500000	78.18460545	0.104706
5	-0.26002678	9.10384650	-2.36724389		5.00000000	6.86800000	62.52521776	0.126105
6	-0.24986452	9.11104300	-2.27652639		6.00000000	5.72333333	52.14553610	0.147511
7	-0.24003717	9.10486320	-2.18550560		7.00000000	4.90571429	44.66585747	0.168901
8	-0.22986001	9.11709120	-2.09565467		8.00000000	4.29250000	39.13511398	0.190393
9	-0.22004680	9.10661510	-2.00388151		9.00000000	3.81555556	34.74679584	0.211771
10	-0.20995300	9.10928730	-1.91252220		10.00000000	3.43400000	31.28129259	0.233128
11	-0.20011076	9.10795880	-1.82260056		11.00000000	3.12181818	28.43339138	0.254507
12	-0.18992169	9.11035060	-1.73025318		12.00000000	2.86166667	26.07078663	0.275987
13	-0.18015760	9.11531160	-1.64219266		13.00000000	2.64153846	24.07844618	0.297371
14	-0.17002213	9.10746960	-1.54847138		14.00000000	2.45285714	22.33932186	0.318760
15	-0.16019253	9.10542390	-1.45862089		15.00000000	2.28933333	20.84535045	0.340116
16	-0.15003920	9.11698440	-1.36790505		16.00000000	2.14625000	19.56732777	0.361585
17	-0.13987470	9.11221980	-1.27456901		17.00000000	2.02000000	18.40668400	0.382970
18	-0.13005775	9.10217950	-1.18380899		18.00000000	1.90777778	17.36493578	0.404350
19	-0.11992005	9.11662860	-1.09326656		19.00000000	1.80736842	16.47710664	0.425718
20	-0.11007409	9.10422710	-1.00213951		20.00000000	1.71700000	15.63195793	0.447204
21	-0.09993191	9.11085410	-0.91046506		21.00000000	1.63523810	14.89841570	0.468583
22	-0.09012242	9.10169700	-0.82026700		22.00000000	1.56090909	14.20692159	0.489979
23	-0.07996089	9.10465810	-0.72801656		23.00000000	1.49304348	13.59365040	0.511461
24	-0.07013652	9.10983940	-0.63893241		24.00000000	1.43083333	13.03466187	0.532841
25	-0.05999955	9.10121150	-0.54606858		25.00000000	1.37360000	12.50142412	0.554209
26	-0.04985290	9.11562060	-0.45444016		26.00000000	1.32076923	12.03963121	0.575580
27	-0.04001737	9.09975810	-0.36414835		27.00000000	1.27185185	11.57354419	0.597109
28	-0.02987817	9.12321090	-0.27258481		28.00000000	1.22642857	11.18896651	0.618497
29	-0.02003370	9.10482500	-0.18240329		29.00000000	1.18413793	10.78136864	0.639854
30	-0.00990640	9.11232470	-0.09027035		30.00000000	1.14466667	10.43057434	0.661241
31	-0.00067819	9.09353640	-0.00616713		31.00000000	1.10774194	10.07329161	0.682831
32	0.00946229	9.10854630	0.08618774		32.00000000	1.07312500	9.77460875	0.704206
33	0.01930351	9.09949590	0.17565217		33.00000000	1.04060606	9.46899058	0.725564
34	0.02947293	9.11260990	0.26857535		34.00000000	1.01000000	9.20373600	0.746935
35	0.03924270	9.11722280	0.35778440		35.00000000	0.98114286	8.94529803	0.768416
36	0.04943892	9.09787080	0.44978887		36.00000000	0.95388889	8.67835787	0.789795
37	0.05923845	9.10974310	0.53964708		37.00000000	0.92810811	8.45482643	0.811145
38	0.06939001	9.10195060	0.63158448		38.00000000	0.90368421	8.22528904	0.832518
39	0.07952669	9.10944940	0.72444439		39.00000000	0.88051282	8.02098698	0.853991
40	0.08935228	9.10002990	0.81310842		40.00000000	0.85850000	7.81237567	0.875372
41	0.09947556	9.10222150	0.90544861		41.00000000	0.83756098	7.62366552	0.896721
42	0.10929295	9.11386010	0.99608066		42.00000000	0.81761905	7.45166562	0.918103
43	0.11947280	9.10553740	1.08786405		43.00000000	0.79860465	7.27172452	0.939574
44	0.12930657	9.10854630	1.17779488		44.00000000	0.78045455	7.10880636	0.960961
45	0.13942167	9.10911370	1.27000784		45.00000000	0.76311111	6.95126588	0.982370
46	0.14926140	9.10405060	1.35888334		46.00000000	0.74652174	6.79637169	1.003725
47	0.15941966	9.10914040	1.45217607		47.00000000	0.73063830	6.65548684	1.025205
48	0.16950944	9.11612610	1.54526943		48.00000000	0.71541667	6.52182855	1.046585
49	0.17938490	9.10368820	1.63306420		49.00000000	0.70081633	6.38001332	1.067965
50	0.18952753	9.10689740	1.72600777		50.00000000	0.68680000	6.25461713	1.089323
51	0.19927274	9.10475440	1.81432936		51.00000000	0.67333333	6.13053463	1.110809
52	0.20941909	9.10864160	1.90752344		52.00000000	0.66038462	6.01520678	1.132197
53	0.21928114	9.09404370	1.99415227		53.00000000	0.64792453	5.89225397	1.153593
54	0.22943270	9.10742660	2.08954147		54.00000000	0.63592593	5.79164869	1.175076
55	0.23925978	9.10051060	2.17738616		55.00000000	0.62436364	5.68202789	1.196501
56	0.24940613	9.12078760	2.27478034		56.00000000	0.61321429	5.59299725	1.217855
57	0.25953090	9.09500690	2.36043533		57.00000000	0.60245614	5.47934275	1.239238
58	0.26937509	9.09379010	2.44964053		58.00000000	0.59206897	5.38415090	1.260709
59	0.27950880	9.11370470	2.54736066		59.00000000	0.58203390	5.30448507	1.282080
60	0.28934330	9.10214420	2.63364444		60.00000000	0.57233333	5.20946053	1.303430
61	0.29945022	9.10786530	2.72735227		61.00000000	0.56295082	5.12728024	1.324807
62	0.30931005	9.10150530	2.81518706		62.00000000	0.55387097	5.04105955	1.346284
63	0.31946903	9.11756320	2.91277907		63.00000000	0.54507937	4.96979556	1.367662
64	0.32928124	9.09292410	2.99412932		64.00000000	0.53656250	4.87892209	1.389026
65	0.33938366	9.11028670	3.09188244		65.00000000	0.52830769	4.81303454	1.410404
66	0.34926432	9.08966450	3.17469549		66.00000000	0.52030303	4.72937998	1.431870
67	0.35938761	9.10916520	3.27372111		67.00000000	0.51253731	4.66878706	1.453249
68	0.36953917	9.09483340	3.36089719		68.00000000	0.50500000	4.59289087	1.474598
69	0.37934169	9.10436730	3.45366608		69.00000000	0.49768116	4.53107207	1.495978
70	0.38950887	9.12010000	3.55235985		70.00000000	0.49057143	4.47406049	1.517461
71	0.39932850	9.08598800	3.62829396		71.00000000	0.48366197	4.39454687	1.538840
72	0.40949050	9.11359500	3.73193057		72.00000000	0.47694444	4.34667850	1.560198
73	0.41929525	9.06761840	3.80200932		73.00000000	0.47041096	4.26550707	1.581571
74	0.42942744	9.09765530	3.90678283		74.00000000	0.46405405	4.22180382	1.603036
75	0.43925303	9.09025380	3.99292153		75.00000000	0.45786667	4.16212421	1.624428
76	0.44938898	9.07077980	4.07630848		76.00000000	0.45184211	4.09856024	1.645794
77	0.45955914	9.09123130	4.17795844		77.00000000	0.44597403	4.05445302	1.667153
78	0.46942267	9.06779580	4.25662892		78.00000000	0.44025641	3.99215523	1.688612
79	0.47954819	9.06022740	4.34481565		79.00000000	0.43468354	3.93833176	1.709976
80	0.48935890	9.04789450	4.42766770		80.00000000	0.42925000	3.88380871	1.731366
81	0.49949110	9.03472330	4.51276388		81.00000000	0.42395062	3.83027652	1.752739
82	0.50934273	9.00400730	4.58612566		82.00000000	0.41878049	3.77070257	1.774214
83	0.51945484	8.98755260	4.66862770		83.00000000	0.41373494	3.71846453	1.795589
84	0.52928716	8.95662500	4.74062661		84.00000000	0.40880952	3.66155360	1.816976
85	0.53939849	8.89404960	4.79743692		85.00000000	0.40400000	3.59319604	1.838466
86	0.54954267	8.82260990	4.84840060		86.00000000	0.39930233	3.52288865	1.859861
87	0.55934811	8.73986050	4.88862445		87.00000000	0.39471264	3.44973344	1.881220
88	0.56948632	8.57767200	4.88486686		88.00000000	0.39022727	3.34724155	1.902591
89	0.57928956	8.41544150	4.87497740		89.00000000	0.38584270	3.24703664	1.924106
90	0.58943069	8.12395100	4.78850604		90.00000000	0.38155556	3.09973864	1.945493
91	0.59921759	7.80044360	4.67416301		91.00000000	0.37736264	2.94359597	1.966843
92	0.60932153	7.31159540	4.45511250		92.00000000	0.37326087	2.72913246	1.988331
93	0.61914188	6.70934630	4.15403728		93.00000000	0.36924731	2.47740809	2.009837
94	0.62925029	5.88735100	3.70461732		94.00000000	0.36531915	2.15076206	2.031217
95	0.63938177	4.81668000	3.07969738		95.00000000	0.36147368	1.74110307	2.052573
96	0.64914703	3.50097580	2.27264804		96.00000000	0.35770833	1.25232822	2.073942
97	0.65923983	1.83484080	1.20960014		97.00000000	0.35402062	0.64957147	2.095429
98	0.66897607	-0.15752649	-0.10538145		98.00000000	0.35040816	-0.05519857	2.116821
99	0.67908448	-2.62338520	-1.78150017		99.00000000	0.34686869	-0.90997018	2.138228
100	0.68878430	-5.46350960	-3.76317964		100.00000000	0.34340000	-1.87616920	2.159622
101	0.69905943	-8.95267200	-6.25844979		101.00000000	0.34000000	-3.04390848	2.181108
01:19 04/04/2018
Test Lot:	JK-PERC
Recipe:	Recipe_YJX-LID
Cell Name:	3-12-3h
Test Order:	4
Test Condition:	Light
1	-0.29994503	9.10823150	-2.73196877		1.00000000	34.34000000	312.77666971	0.000000
2	-0.29014391	9.09257220	-2.63815445		2.00000000	17.17000000	156.11946467	0.061801
3	-0.28000119	9.11048790	-2.55094745		3.00000000	11.44666667	104.28471816	0.083253
4	-0.27018893	9.11235330	-2.46205699		4.00000000	8.58500000	78.22955308	0.104628
5	-0.26001868	9.09535880	-2.36496319		5.00000000	6.86800000	62.46692424	0.126128
6	-0.24985510	9.12697980	-2.28042245		6.00000000	5.72333333	52.23674772	0.147496
7	-0.24002497	9.10317420	-2.18498911		7.00000000	4.90571429	44.65757172	0.168889
8	-0.22990234	9.11919120	-2.09652340		8.00000000	4.29250000	39.14412823	0.190373
9	-0.22008412	9.11463170	-2.00598570		9.00000000	3.81555556	34.77738362	0.211768
10	-0.20993841	9.10460950	-1.91140724		10.00000000	3.43400000	31.26522902	0.233128
11	-0.20012242	9.10204320	-1.82152291		11.00000000	3.12181818	28.41492395	0.254495
12	-0.18992610	9.10641860	-1.72954657		12.00000000	2.86166667	26.05953456	0.275979
13	-0.18016146	9.11196990	-1.64162580		13.00000000	2.64153846	24.06961895	0.297348
14	-0.17002469	9.10560610	-1.54817785		14.00000000	2.45285714	22.33475096	0.318701
15	-0.16018786	9.10822300	-1.45902675		15.00000000	2.28933333	20.85175852	0.340078
16	-0.15007193	9.11029430	-1.36719945		16.00000000	2.14625000	19.55296914	0.361549
17	-0.13992772	9.11328790	-1.27520160		17.00000000	2.02000000	18.40884156	0.382912
18	-0.13006409	9.09980490	-1.18355784		18.00000000	1.90777778	17.36040557	0.404269
19	-0.11992212	9.11901760	-1.09357192		19.00000000	1.80736842	16.48142444	0.425636
20	-0.11010537	9.10909940	-1.00296076		20.00000000	1.71700000	15.64032367	0.447121
21	-0.09994256	9.09365650	-0.90884329		21.00000000	1.63523810	14.87029353	0.468505
22	-0.09011391	9.11339190	-0.82124336		22.00000000	1.56090909	14.22517627	0.489844
23	-0.07997044	9.10045910	-0.72776774		23.00000000	1.49304348	13.58738111	0.511217
24	-0.07017306	9.10768030	-0.63911375		24.00000000	1.43083333	13.03157256	0.532706
25	-0.06000056	9.09520050	-0.54571710		25.00000000	1.37360000	12.49316741	0.554074
26	-0.04985337	9.11639400	-0.45448296		26.00000000	1.32076923	12.04065269	0.575431
27	-0.04004110	9.10559270	-0.36459792		27.00000000	1.27185185	11.58096494	0.596808
28	-0.02989019	9.10172080	-0.27205214		28.00000000	1.22642857	11.16261044	0.618286
29	-0.02007642	9.11341480	-0.18296478		29.00000000	1.18413793	10.79154015	0.639675
30	-0.00990319	9.10264870	-0.09014523		30.00000000	1.14466667	10.41949855	0.661018
31	-0.00068185	9.12124730	-0.00621935		31.00000000	1.10774194	10.10398814	0.682511
32	0.00946439	9.10110190	0.08613633		32.00000000	1.07312500	9.76661998	0.703982
33	0.01930466	9.10817150	0.17583014		33.00000000	1.04060606	9.47801846	0.725355
34	0.02942254	9.11434270	0.26816707		34.00000000	1.01000000	9.20548613	0.746737
35	0.03923899	9.10777380	0.35737987		35.00000000	0.98114286	8.93602721	0.768085
36	0.04936357	9.10883520	0.44964458		36.00000000	0.95388889	8.68881669	0.789565
37	0.05918151	9.09751510	0.53840469		37.00000000	0.92810811	8.44347753	0.810959
38	0.06933213	9.10168550	0.63103924		38.00000000	0.90368421	8.22504948	0.832357
39	0.07947308	9.10501380	0.72360347		39.00000000	0.88051282	8.01708138	0.853815
40	0.08931857	9.12090970	0.81466658		40.00000000	0.85850000	7.83030098	0.875256
41	0.09946993	9.09908200	0.90508505		41.00000000	0.83756098	7.62103600	0.896622
42	0.10928044	9.11462970	0.99605074		42.00000000	0.81761905	7.45229485	0.917997
43	0.11944073	9.10330770	1.08730572		43.00000000	0.79860465	7.26994387	0.939356
44	0.12925868	9.10373880	1.17673726		44.00000000	0.78045455	7.10505433	0.960850
45	0.13940707	9.10149190	1.26881232		45.00000000	0.76311111	6.94544960	0.982217
46	0.14924064	9.11440470	1.36023959		46.00000000	0.74652174	6.80410125	1.003585
47	0.15938382	9.10029700	1.45044010		47.00000000	0.73063830	6.64902551	1.024950
48	0.16948161	9.11271570	1.54443773		48.00000000	0.71541667	6.51938869	1.046422
49	0.17934048	9.10830310	1.63348745		49.00000000	0.70081633	6.38324752	1.067826
50	0.18949631	9.10978510	1.72627066		50.00000000	0.68680000	6.25660041	1.089219
51	0.19928820	9.09996030	1.81351471		51.00000000	0.67333333	6.12730660	1.110586
52	0.20941129	9.12540630	1.91096311		52.00000000	0.66038462	6.02627793	1.132055
53	0.21924710	9.10661410	1.99659873		53.00000000	0.64792453	5.90039865	1.153426
54	0.22941931	9.10419270	2.08867761		54.00000000	0.63592593	5.78959217	1.174813
55	0.23922832	9.10431580	2.17801017		55.00000000	0.62436364	5.68440372	1.196296
56	0.24937299	9.11387730	2.27275483		56.00000000	0.61321429	5.58875976	1.217673
57	0.25950575	9.10133550	2.36184889		57.00000000	0.60245614	5.48315546	1.239032
58	0.26935348	9.10444260	2.45231330		58.00000000	0.59206897	5.39045791	1.260394
59	0.27948549	9.09408760	2.54166553		59.00000000	0.58203390	5.29306726	1.281866
60	0.28933245	9.11578270	2.63749174		60.00000000	0.57233333	5.21726630	1.303255
61	0.29946446	9.09528260	2.72371389		61.00000000	0.56295082	5.12019679	1.324618
62	0.30926457	9.10917090	2.81714382		62.00000000	0.55387097	5.04530530	1.345997
63	0.31939805	9.08879180	2.90294238		63.00000000	0.54507937	4.95411286	1.367472
64	0.32924727	9.10009860	2.99618262		64.00000000	0.53656250	4.88277166	1.388847
65	0.33939937	9.09340670	3.08629651		65.00000000	0.52830769	4.80411671	1.410177
66	0.34917936	9.09339620	3.17522627		66.00000000	0.52030303	4.73132160	1.431562
67	0.35932776	9.10140040	3.27038582		67.00000000	0.51253731	4.66480731	1.453033
68	0.36949030	9.10603810	3.36459275		68.00000000	0.50500000	4.59854924	1.474406
69	0.37933725	9.08329300	3.44563139		69.00000000	0.49768116	4.52058379	1.495745
70	0.38946703	9.09698580	3.54297604		70.00000000	0.49057143	4.46272132	1.517119
71	0.39930806	9.08514880	3.62777314		71.00000000	0.48366197	4.39414098	1.538589
72	0.40944454	9.10057450	3.72618054		72.00000000	0.47694444	4.34046845	1.559970
73	0.41925803	9.09232330	3.81202955		73.00000000	0.47041096	4.27712852	1.581320
74	0.42939004	9.08301070	3.90015433		74.00000000	0.46405405	4.21500794	1.602705
75	0.43921095	9.08977790	3.99232999		75.00000000	0.45786667	4.16190631	1.624190
76	0.44939879	9.08172040	4.08131416		76.00000000	0.45184211	4.10350366	1.645560
77	0.45954719	9.07054040	4.16834135		77.00000000	0.44597403	4.04522542	1.666923
78	0.46938375	9.07108970	4.25782210		78.00000000	0.44025641	3.99360539	1.688292
79	0.47954106	9.06054400	4.34490287		79.00000000	0.43468354	3.93846938	1.709762
80	0.48932922	9.04693890	4.42693156		80.00000000	0.42925000	3.88339852	1.731142
81	0.49945900	9.02867790	4.50945444		81.00000000	0.42395062	3.82771357	1.752524
82	0.50930744	9.01710220	4.59247724		82.00000000	0.41878049	3.77618646	1.773874
83	0.51947296	8.97488210	4.66220857		83.00000000	0.41373494	3.71322230	1.795350
84	0.52920234	8.94309620	4.73270744		84.00000000	0.40880952	3.65602290	1.816731
85	0.53938425	8.88885500	4.79450839		85.00000000	0.40400000	3.59109742	1.838128
86	0.54951400	8.82692720	4.85052007		86.00000000	0.39930233	3.52461256	1.859611
87	0.55932897	8.71807960	4.87627448		87.00000000	0.39471264	3.44113625	1.880983
88	0.56944835	8.59137920	4.89234671		88.00000000	0.39022727	3.35259047	1.902342
89	0.57928193	8.39652250	4.86395376		89.00000000	0.38584270	3.23973688	1.923725
90	0.58942509	8.14354520	4.80000986		90.00000000	0.38155556	3.10721491	1.945196
91	0.59917313	7.78441620	4.66421302		91.00000000	0.37736264	2.93754783	1.966594
92	0.60931998	7.32599260	4.46387366		92.00000000	0.37326087	2.73450637	1.988052
93	0.61911041	6.70432900	4.15071988		93.00000000	0.36924731	2.47555546	2.009456
94	0.62924320	5.88518240	3.70321101		94.00000000	0.36531915	2.14996983	2.030968
95	0.63937968	4.81610820	3.07932172		95.00000000	0.36147368	1.74089637	2.052345
96	0.64913136	3.51271150	2.28021119		96.00000000	0.35770833	1.25652618	2.073711
97	0.65920460	1.82701150	1.20437439		97.00000000	0.35402062	0.64679974	2.095133
98	0.66893619	-0.16084558	-0.10759543		98.00000000	0.35040816	-0.05636160	2.116628
99	0.67901391	-2.63121270	-1.78663002		99.00000000	0.34686869	-0.91268529	2.138020
100	0.68872464	-5.47373060	-3.76989314		100.00000000	0.34340000	-1.87967909	2.159367
101	0.69906211	-8.95595930	-6.26077181		101.00000000	0.34000000	-3.04502616	2.180734
