# Supplementary material for: Study on the Electrical Injection Regeneration of Industrialized B-Doped Czochralski Silicon PERC Solar Cells
Source: Hindawi journal article supplement (doi:10.1155/2019/5357370), 2019-06-20
Supplement: f1 [file 5357370.f1.zip › section3.3/IVRawData_3-12-4h.csv]

02:21 04/04/2018
Test Lot:	JK-PERC
Recipe:	Recipe_YJX-LID
Cell Name:	3-12-4h
Test Order:	2
Test Condition:	Light
1	-0.29991823	9.11714270	-2.73439730		1.00000000	34.34000000	313.08268032	0.000000
2	-0.29011181	9.10965440	-2.64281833		2.00000000	17.17000000	156.41276605	0.061755
3	-0.27997416	9.09848310	-2.54734016		3.00000000	11.44666667	104.14730322	0.083278
4	-0.27014464	9.11175920	-2.46149291		4.00000000	8.58500000	78.22445273	0.104725
5	-0.25999734	9.09890370	-2.36569076		5.00000000	6.86800000	62.49127061	0.126100
6	-0.24982248	9.10754970	-2.27527065		6.00000000	5.72333333	52.12554278	0.147491
7	-0.24003540	9.11013030	-2.18675377		7.00000000	4.90571429	44.69169636	0.169009
8	-0.22982928	9.10860820	-2.09342486		8.00000000	4.29250000	39.09870070	0.190400
9	-0.22000647	9.11877350	-2.00618917		9.00000000	3.81555556	34.79318689	0.211763
10	-0.20987627	9.09339810	-1.90848847		10.00000000	3.43400000	31.22672908	0.233137
11	-0.20007803	9.11925890	-1.82456336		11.00000000	3.12181818	28.46866824	0.254603
12	-0.18991955	9.10221480	-1.72868854		12.00000000	2.86166667	26.04750469	0.275971
13	-0.18013394	9.10142330	-1.63947524		13.00000000	2.64153846	24.04175970	0.297309
14	-0.17001937	9.11177250	-1.54917782		14.00000000	2.45285714	22.34987626	0.318684
15	-0.16020624	9.09329410	-1.45680246		15.00000000	2.28933333	20.81758129	0.340163
16	-0.15007605	9.11866950	-1.36849390		16.00000000	2.14625000	19.57094441	0.361532
17	-0.13989896	9.11826900	-1.27563635		17.00000000	2.02000000	18.41890338	0.382884
18	-0.13004562	9.09251020	-1.18244113		18.00000000	1.90777778	17.34648890	0.404265
19	-0.11990874	9.12240510	-1.09385610		19.00000000	1.80736842	16.48754690	0.425739
20	-0.11010230	9.09686570	-1.00158584		20.00000000	1.71700000	15.61931841	0.447119
21	-0.09996912	9.08932400	-0.90865171		21.00000000	1.63523810	14.86320886	0.468470
22	-0.09011951	9.10624310	-0.82065018		22.00000000	1.56090909	14.21401764	0.489846
23	-0.07996476	9.11320400	-0.72873514		23.00000000	1.49304348	13.60640980	0.511331
24	-0.07015088	9.10247990	-0.63854693		24.00000000	1.43083333	13.02413166	0.532732
25	-0.06003482	9.10845760	-0.54682460		25.00000000	1.37360000	12.51137736	0.554131
26	-0.04985029	9.10676100	-0.45397470		26.00000000	1.32076923	12.02792972	0.575517
27	-0.04002748	9.10645870	-0.36450857		27.00000000	1.27185185	11.58206636	0.597005
28	-0.02990696	9.10490320	-0.27229994		28.00000000	1.22642857	11.16651342	0.618393
29	-0.02006703	9.10273360	-0.18266478		29.00000000	1.18413793	10.77889213	0.639746
30	-0.00993087	9.11282540	-0.09049832		30.00000000	1.14466667	10.43114747	0.661124
31	-0.00064542	9.09952930	-0.00587301		31.00000000	1.10774194	10.07993020	0.682716
32	0.00950913	9.10626030	0.08659260		32.00000000	1.07312500	9.77215558	0.704090
33	0.01933241	9.10194110	0.17596243		33.00000000	1.04060606	9.47153507	0.725477
34	0.02945264	9.09986780	0.26801512		34.00000000	1.01000000	9.19086648	0.746832
35	0.03928782	9.11679270	0.35817895		35.00000000	0.98114286	8.94487604	0.768308
36	0.04942964	9.10728450	0.45016979		36.00000000	0.95388889	8.68733749	0.789678
37	0.05924250	9.10299870	0.53928442		37.00000000	0.92810811	8.44856690	0.811067
38	0.06938060	9.09784510	0.63121392		38.00000000	0.90368421	8.22157897	0.832491
39	0.07954027	9.10281370	0.72404024		39.00000000	0.88051282	8.01514417	0.853954
40	0.08937843	9.10749630	0.81401373		40.00000000	0.85850000	7.81878557	0.875325
41	0.09951206	9.09168240	0.90473207		41.00000000	0.83756098	7.61483838	0.896691
42	0.10931896	9.11713600	0.99667583		42.00000000	0.81761905	7.45434405	0.918063
43	0.11950023	9.11095810	1.08876159		43.00000000	0.79860465	7.27605352	0.939556
44	0.12929820	9.10052870	1.17668198		44.00000000	0.78045455	7.10254899	0.960926
45	0.13944969	9.10780330	1.27008035		45.00000000	0.76311111	6.95026590	0.982295
46	0.14927669	9.11688420	1.36093830		46.00000000	0.74652174	6.80595225	1.003658
47	0.15942520	9.09561920	1.45007091		47.00000000	0.73063830	6.64560773	1.025143
48	0.16953725	9.11543560	1.54540588		48.00000000	0.71541667	6.52133455	1.046534
49	0.17937021	9.09411050	1.63121251		49.00000000	0.70081633	6.37330111	1.067916
50	0.18952392	9.11258030	1.72705194		50.00000000	0.68680000	6.25852015	1.089269
51	0.19931670	9.10235120	1.81425060		51.00000000	0.67333333	6.12891647	1.110741
52	0.20944436	9.10709760	1.90743023		52.00000000	0.66038462	6.01418715	1.132123
53	0.21925797	9.10521030	1.99638993		53.00000000	0.64792453	5.89948909	1.153542
54	0.22941318	9.11070920	2.09011677		54.00000000	0.63592593	5.79373618	1.175029
55	0.23924986	9.09697440	2.17644985		55.00000000	0.62436364	5.67982002	1.196411
56	0.24937977	9.11485480	2.27306039		56.00000000	0.61321429	5.58935918	1.217771
57	0.25952381	9.09777160	2.36108835		57.00000000	0.60245614	5.48100836	1.239149
58	0.26935378	9.10133360	2.45147861		58.00000000	0.59206897	5.38861717	1.260623
59	0.27949858	9.10281180	2.54422297		59.00000000	0.58203390	5.29814504	1.282013
60	0.28933004	9.09374520	2.63109366		60.00000000	0.57233333	5.20465350	1.303362
61	0.29947409	9.09483150	2.72366639		61.00000000	0.56295082	5.11994285	1.324742
62	0.30930182	9.09706590	2.81373904		62.00000000	0.55387097	5.03860069	1.346229
63	0.31946152	9.09348300	2.90501790		63.00000000	0.54507937	4.95666994	1.367598
64	0.32927808	9.11141870	3.00019046		64.00000000	0.53656250	4.88884560	1.388940
65	0.33944148	9.09729290	3.08799857		65.00000000	0.52830769	4.80616982	1.410316
66	0.34924394	9.10495470	3.17985025		66.00000000	0.52030303	4.73733552	1.431793
67	0.35940287	9.09317400	3.26811283		67.00000000	0.51253731	4.66059097	1.453170
68	0.36955214	9.09677220	3.36173163		68.00000000	0.50500000	4.59386996	1.474519
69	0.37936646	9.10217480	3.45305983		69.00000000	0.49768116	4.52998091	1.495890
70	0.38951126	9.09202100	3.54144456		70.00000000	0.49057143	4.46028573	1.517395
71	0.39936209	9.09229950	3.63111973		71.00000000	0.48366197	4.39759950	1.538778
72	0.40948305	9.09353450	3.72364824		72.00000000	0.47694444	4.33711076	1.560142
73	0.41933388	9.08320430	3.80889530		73.00000000	0.47041096	4.27283884	1.581529
74	0.42944965	9.09759140	3.90695744		74.00000000	0.46405405	4.22177417	1.603011
75	0.43926993	9.08203600	3.98946532		75.00000000	0.45786667	4.15836155	1.624430
76	0.44941548	9.07715420	4.07941361		76.00000000	0.45184211	4.10144046	1.645808
77	0.45955580	9.07084470	4.16855929		77.00000000	0.44597403	4.04536113	1.667170
78	0.46944606	9.07505320	4.26024797		78.00000000	0.44025641	3.99535034	1.688641
79	0.47955588	9.05575470	4.34274041		79.00000000	0.43468354	3.93638755	1.710027
80	0.48935160	9.03519540	4.42138733		80.00000000	0.42925000	3.87835763	1.731416
81	0.49950981	9.01775170	4.50445544		81.00000000	0.42395062	3.82308140	1.752755
82	0.50934201	9.02127360	4.59491363		82.00000000	0.41878049	3.77793336	1.774230
83	0.51947784	8.97546860	4.66255704		83.00000000	0.41373494	3.71346496	1.795603
84	0.52926022	8.93906210	4.73108997		84.00000000	0.40880952	3.65437372	1.816987
85	0.53940499	8.88749500	4.79395915		85.00000000	0.40400000	3.59054798	1.838476
86	0.54954457	8.80283550	4.83755045		86.00000000	0.39930233	3.51499269	1.859855
87	0.55935818	8.71376320	4.87411472		87.00000000	0.39471264	3.43943251	1.881214
88	0.56948662	8.57466510	4.88315705		88.00000000	0.39022727	3.34606818	1.902593
89	0.57927638	8.38477130	4.85709997		89.00000000	0.38584270	3.23520277	1.924065
90	0.58941078	8.12467190	4.78876920		90.00000000	0.38155556	3.10001370	1.945458
91	0.59922361	7.76890750	4.65531280		91.00000000	0.37736264	2.93169542	1.966800
92	0.60934907	7.29038190	4.44238743		92.00000000	0.37326087	2.72121429	1.988273
93	0.61915374	6.66547920	4.12695638		93.00000000	0.36924731	2.46121028	2.009780
94	0.62923157	5.83153770	3.66938762		94.00000000	0.36531915	2.13037239	2.031173
95	0.63935846	4.75701380	3.04143702		95.00000000	0.36147368	1.71953530	2.052592
96	0.64918029	3.45959190	2.24589887		96.00000000	0.35770833	1.23752485	2.073992
97	0.65923053	1.79148450	1.18100128		97.00000000	0.35402062	0.63422245	2.095515
98	0.66895038	-0.18077904	-0.12093221		98.00000000	0.35040816	-0.06334645	2.116911
99	0.67909443	-2.60393910	-1.76832054		99.00000000	0.34686869	-0.90322494	2.138264
100	0.68878001	-5.37780090	-3.70412176		100.00000000	0.34340000	-1.84673683	2.159633
101	0.69904536	-8.74333380	-6.11198692		101.00000000	0.34000000	-2.97273349	2.181113
02:21 04/04/2018
Test Lot:	JK-PERC
Recipe:	Recipe_YJX-LID
Cell Name:	3-12-4h
Test Order:	3
Test Condition:	Light
1	-0.29993555	9.10807320	-2.73183494		1.00000000	34.34000000	312.77123369	0.000000
2	-0.29009876	9.11166670	-2.64328321		2.00000000	17.17000000	156.44731724	0.061796
3	-0.27995086	9.11386780	-2.55143513		3.00000000	11.44666667	104.32340675	0.083230
4	-0.27009845	9.10571380	-2.45943918		4.00000000	8.58500000	78.17255297	0.104627
5	-0.25994235	9.11644650	-2.36975053		5.00000000	6.86800000	62.61175456	0.126111
6	-0.24979001	9.10392760	-2.27407017		6.00000000	5.72333333	52.10481230	0.147533
7	-0.23997480	9.11518290	-2.18741419		7.00000000	4.90571429	44.71648297	0.168935
8	-0.22982021	9.10902310	-2.09343760		8.00000000	4.29250000	39.10048166	0.190423
9	-0.22001097	9.10458370	-2.00310829		9.00000000	3.81555556	34.73904492	0.211813
10	-0.20985934	9.10958390	-1.91173126		10.00000000	3.43400000	31.28231111	0.233162
11	-0.20003818	9.09509750	-1.81936675		11.00000000	3.12181818	28.39324074	0.254538
12	-0.18990146	9.11637310	-1.73121256		12.00000000	2.86166667	26.08802102	0.276025
13	-0.18013462	9.10917660	-1.64087807		13.00000000	2.64153846	24.06224034	0.297400
14	-0.16997558	9.10796830	-1.54813219		14.00000000	2.45285714	22.34054510	0.318740
15	-0.16017897	9.10391140	-1.45825515		15.00000000	2.28933333	20.84188783	0.340122
16	-0.14998941	9.10039330	-1.36496262		16.00000000	2.14625000	19.53171912	0.361598
17	-0.13985863	9.11095710	-1.27424598		17.00000000	2.02000000	18.40413334	0.382994
18	-0.13004120	9.10936550	-1.18459282		18.00000000	1.90777778	17.37864507	0.404356
19	-0.11990968	9.10805990	-1.09214455		19.00000000	1.80736842	16.46161984	0.425735
20	-0.11009298	9.10955720	-1.00289830		20.00000000	1.71700000	15.64110971	0.447226
21	-0.09994360	9.12374310	-0.91185974		21.00000000	1.63523810	14.91949229	0.468612
22	-0.09012169	9.11058330	-0.82106120		22.00000000	1.56090909	14.22079230	0.489965
23	-0.07999539	9.09294800	-0.72739396		23.00000000	1.49304348	13.57616671	0.511332
24	-0.07015265	9.12215040	-0.63994301		24.00000000	1.43083333	13.05227686	0.532808
25	-0.06000178	9.10296340	-0.54619400		25.00000000	1.37360000	12.50383053	0.554182
26	-0.04982933	9.11787030	-0.45433737		26.00000000	1.32076923	12.04260254	0.575550
27	-0.04002826	9.09330840	-0.36398934		27.00000000	1.27185185	11.56534113	0.596933
28	-0.02989898	9.10559650	-0.27224804		28.00000000	1.22642857	11.16736371	0.618417
29	-0.02006814	9.10235210	-0.18266730		29.00000000	1.18413793	10.77844038	0.639813
30	-0.00991430	9.10331340	-0.09025297		30.00000000	1.14466667	10.42025941	0.661216
31	-0.00065281	9.11324210	-0.00594926		31.00000000	1.10774194	10.09512044	0.682688
32	0.00949115	9.10105230	0.08637941		32.00000000	1.07312500	9.76656675	0.704171
33	0.01931500	9.11887840	0.17613117		33.00000000	1.04060606	9.48916013	0.725545
34	0.02945070	9.09620090	0.26788947		34.00000000	1.01000000	9.18716291	0.746934
35	0.03927307	9.12424370	0.35833704		35.00000000	0.98114286	8.95218653	0.768315
36	0.04944300	9.09487250	0.44967774		36.00000000	0.95388889	8.67549782	0.789802
37	0.05924676	9.11300660	0.53991611		37.00000000	0.92810811	8.45785531	0.811175
38	0.06940701	9.10689540	0.63208237		38.00000000	0.90368421	8.22975758	0.832572
39	0.07954791	9.10318180	0.72413910		39.00000000	0.88051282	8.01546828	0.854054
40	0.08938145	9.11381820	0.81460628		40.00000000	0.85850000	7.82421292	0.875443
41	0.09952682	9.10143760	0.90583710		41.00000000	0.83756098	7.62300896	0.896793
42	0.10931495	9.10689160	0.99551940		42.00000000	0.81761905	7.44596804	0.918166
43	0.11949977	9.09389310	1.08671813		43.00000000	0.79860465	7.26242533	0.939638
44	0.12932065	9.10857580	1.17792694		44.00000000	0.78045455	7.10882939	0.961035
45	0.13947122	9.10309700	1.26962004		45.00000000	0.76311111	6.94667447	0.982381
46	0.14929582	9.10984420	1.36006166		46.00000000	0.74652174	6.80069674	1.003764
47	0.15945236	9.09946160	1.45093063		47.00000000	0.73063830	6.64841513	1.025249
48	0.16957688	9.10921860	1.54471287		48.00000000	0.71541667	6.51688681	1.046618
49	0.17940223	9.11413190	1.63509559		49.00000000	0.70081633	6.38733244	1.067974
50	0.18955579	9.09177680	1.72339893		50.00000000	0.68680000	6.24423231	1.089359
51	0.19931936	9.10854240	1.81550884		51.00000000	0.67333333	6.13308522	1.110883
52	0.20948334	9.08971690	1.90414426		52.00000000	0.66038462	6.00270920	1.132268
53	0.21928859	9.10801700	1.99728421		53.00000000	0.64792453	5.90130762	1.153625
54	0.22943842	9.11370090	2.09103313		54.00000000	0.63592593	5.79563868	1.175050
55	0.23924516	9.08549120	2.17365980		55.00000000	0.62436364	5.67265032	1.196530
56	0.24940616	9.10841080	2.27169376		56.00000000	0.61321429	5.58540762	1.217908
57	0.25956643	9.09206390	2.35999457		57.00000000	0.60245614	5.47756973	1.239266
58	0.26935232	9.10805320	2.45327526		58.00000000	0.59206897	5.39259564	1.260643
59	0.27951702	9.10982890	2.54635223		59.00000000	0.58203390	5.30222923	1.282138
60	0.28934163	9.09684660	2.63209642		60.00000000	0.57233333	5.20642854	1.303522
61	0.29947734	9.10497090	2.72673247		61.00000000	0.56295082	5.12565083	1.324936
62	0.30928779	9.10424800	2.81583274		62.00000000	0.55387097	5.04257865	1.346294
63	0.31944731	9.10720060	2.90927073		63.00000000	0.54507937	4.96414712	1.367765
64	0.32927042	9.09356880	2.99424322		64.00000000	0.53656250	4.87926801	1.389157
65	0.33940759	9.10207560	3.08931354		65.00000000	0.52830769	4.80869656	1.410546
66	0.34926495	9.10294820	3.17934075		66.00000000	0.52030303	4.73629153	1.431900
67	0.35939765	9.09528450	3.26882388		67.00000000	0.51253731	4.66167268	1.453369
68	0.36955419	9.09363080	3.36058936		68.00000000	0.50500000	4.59228355	1.474756
69	0.37938476	9.09602930	3.45089489		69.00000000	0.49768116	4.52692241	1.496153
70	0.38952938	9.09083840	3.54114865		70.00000000	0.49057143	4.45970558	1.517639
71	0.39934281	9.09679700	3.63274048		71.00000000	0.48366197	4.39977477	1.539016
72	0.40948817	9.08439160	3.71995089		72.00000000	0.47694444	4.33275010	1.560363
73	0.41934404	9.08828540	3.81111832		73.00000000	0.47041096	4.27522905	1.581738
74	0.42947230	9.10206510	3.90908483		74.00000000	0.46405405	4.22385021	1.603226
75	0.43927234	9.08311460	3.98996100		75.00000000	0.45786667	4.15885540	1.624610
76	0.44945341	9.07469180	4.07865117		76.00000000	0.45184211	4.10032785	1.645964
77	0.45956606	9.07262230	4.16946928		77.00000000	0.44597403	4.04615389	1.667344
78	0.46942413	9.07840160	4.26162077		78.00000000	0.44025641	3.99682450	1.688824
79	0.47957247	9.06044100	4.34513807		79.00000000	0.43468354	3.93842461	1.710209
80	0.48939189	9.04257010	4.42536047		80.00000000	0.42925000	3.88152322	1.731573
81	0.49949929	9.03092960	4.51094292		81.00000000	0.42395062	3.82866818	1.752961
82	0.50934923	9.02546880	4.59711558		82.00000000	0.41878049	3.77969023	1.774476
83	0.51949084	8.98124310	4.66567352		83.00000000	0.41373494	3.71585407	1.795863
84	0.52927154	8.94560620	4.73465477		84.00000000	0.40880952	3.65704901	1.817213
85	0.53942436	8.88130860	4.79079421		85.00000000	0.40400000	3.58804867	1.838600
86	0.54952878	8.81680970	4.84509068		86.00000000	0.39930233	3.52057262	1.860091
87	0.55936605	8.70417310	4.86881893		87.00000000	0.39471264	3.43564718	1.881472
88	0.56948310	8.58567710	4.88939801		88.00000000	0.39022727	3.35036536	1.902833
89	0.57930547	8.39176460	4.86139514		89.00000000	0.38584270	3.23790108	1.924206
90	0.58943373	8.13062290	4.79246338		90.00000000	0.38155556	3.10228434	1.945685
91	0.59923601	7.78554530	4.66537910		91.00000000	0.37736264	2.93797391	1.967075
92	0.60935163	7.30105450	4.44890946		92.00000000	0.37326087	2.72519795	1.988580
93	0.61912113	6.69385580	4.14430757		93.00000000	0.36924731	2.47168826	2.009972
94	0.62928361	5.86024900	3.68775865		94.00000000	0.36531915	2.14086118	2.031452
95	0.63939178	4.80185030	3.07026361		95.00000000	0.36147368	1.73574252	2.052827
96	0.64915758	3.48784730	2.26416251		96.00000000	0.35770833	1.24763204	2.074220
97	0.65926725	1.80401790	1.18932992		97.00000000	0.35402062	0.63865953	2.095570
98	0.66897202	-0.17651245	-0.11808189		98.00000000	0.35040816	-0.06185140	2.117058
99	0.67905414	-2.64620690	-1.79691775		99.00000000	0.34686869	-0.91788631	2.138490
100	0.68880731	-5.48914770	-3.78096506		100.00000000	0.34340000	-1.88497332	2.159892
101	0.69908142	-8.93260290	-6.24461672		101.00000000	0.34000000	-3.03708499	2.181377
02:21 04/04/2018
Test Lot:	JK-PERC
Recipe:	Recipe_YJX-LID
Cell Name:	3-12-4h
Test Order:	4
Test Condition:	Light
1	-0.29994765	9.09964850	-2.72941818		1.00000000	34.34000000	312.48192949	0.000000
2	-0.29012653	9.10611530	-2.64192563		2.00000000	17.17000000	156.35199970	0.061798
3	-0.27998161	9.09888550	-2.54752061		3.00000000	11.44666667	104.15190936	0.083234
4	-0.27017686	9.12050530	-2.46414948		4.00000000	8.58500000	78.29953800	0.104716
5	-0.25999996	9.10046480	-2.36612048		5.00000000	6.86800000	62.50199225	0.126123
6	-0.24987143	9.10271740	-2.27450901		6.00000000	5.72333333	52.09788592	0.147470
7	-0.24004880	9.09634400	-2.18356646		7.00000000	4.90571429	44.62406471	0.168849
8	-0.22990242	9.10745240	-2.09382535		8.00000000	4.29250000	39.09373943	0.190341
9	-0.22007903	9.09893610	-2.00248503		9.00000000	3.81555556	34.71749619	0.211714
10	-0.20992224	9.10894580	-1.91217031		10.00000000	3.43400000	31.28011988	0.233074
11	-0.20009366	9.09443190	-1.81973816		11.00000000	3.12181818	28.39116286	0.254452
12	-0.18995991	9.10677810	-1.72992275		12.00000000	2.86166667	26.06056333	0.275925
13	-0.18015589	9.09816360	-1.63908776		13.00000000	2.64153846	24.03314908	0.297309
14	-0.16998495	9.09821700	-1.54655996		14.00000000	2.45285714	22.31662656	0.318658
15	-0.16018464	9.10539630	-1.45854463		15.00000000	2.28933333	20.84528726	0.340025
16	-0.15002933	9.09533600	-1.36456717		16.00000000	2.14625000	19.52086489	0.361506
17	-0.13988295	9.10509110	-1.27364700		17.00000000	2.02000000	18.39228402	0.382883
18	-0.13005435	9.09641270	-1.18302804		18.00000000	1.90777778	17.35393401	0.404255
19	-0.11993179	9.10888290	-1.09244463		19.00000000	1.80736842	16.46310730	0.425629
20	-0.11009948	9.10272600	-1.00220540		20.00000000	1.71700000	15.62938054	0.447106
21	-0.09993375	9.11858080	-0.91125398		21.00000000	1.63523810	14.91105070	0.468480
22	-0.09010442	9.09871860	-0.81983473		22.00000000	1.56090909	14.20227258	0.489865
23	-0.07996548	9.10458180	-0.72805225		23.00000000	1.49304348	13.59353648	0.511225
24	-0.07015178	9.09631250	-0.63812248		24.00000000	1.43083333	13.01530714	0.532688
25	-0.05999348	9.10512920	-0.54624841		25.00000000	1.37360000	12.50680547	0.554080
26	-0.04986347	9.10362530	-0.45393837		26.00000000	1.32076923	12.02378818	0.575467
27	-0.04004159	9.11277100	-0.36488979		27.00000000	1.27185185	11.59009467	0.596951
28	-0.02990339	9.09079650	-0.27184563		28.00000000	1.22642857	11.14921256	0.618345
29	-0.02008596	9.10777280	-0.18293840		29.00000000	1.18413793	10.78485924	0.639693
30	-0.00995447	9.10192970	-0.09060485		30.00000000	1.14466667	10.41867553	0.661080
31	-0.00068630	9.10215000	-0.00624681		31.00000000	1.10774194	10.08283326	0.682669
32	0.00946732	9.11061480	0.08625308		32.00000000	1.07312500	9.77682851	0.704038
33	0.01927851	9.10348510	0.17550161		33.00000000	1.04060606	9.47314177	0.725399
34	0.02943800	9.09989550	0.26788271		34.00000000	1.01000000	9.19089446	0.746782
35	0.03924249	9.10551450	0.35732307		35.00000000	0.98114286	8.93381051	0.768262
36	0.04937370	9.09508900	0.44905817		36.00000000	0.95388889	8.67570434	0.789664
37	0.05921391	9.10908320	0.53938447		37.00000000	0.92810811	8.45421398	0.811016
38	0.06935108	9.09605880	0.63082147		38.00000000	0.90368421	8.21996472	0.832395
39	0.07950684	9.10897920	0.72422619		39.00000000	0.88051282	8.02057297	0.853878
40	0.08933590	9.10048100	0.81299962		40.00000000	0.85850000	7.81276294	0.875257
41	0.09949688	9.09699820	0.90512293		41.00000000	0.83756098	7.61929069	0.896616
42	0.10928425	9.10960670	0.99553654		42.00000000	0.81761905	7.44818795	0.917995
43	0.11944895	9.09820180	1.08677065		43.00000000	0.79860465	7.26586627	0.939471
44	0.12930182	9.10387900	1.17714812		44.00000000	0.78045455	7.10516375	0.960855
45	0.13944568	9.10235400	1.26928394		45.00000000	0.76311111	6.94610747	0.982207
46	0.14925985	9.09898760	1.35811352		46.00000000	0.74652174	6.79259205	1.003577
47	0.15940966	9.10618590	1.45161400		47.00000000	0.73063830	6.65332817	1.025046
48	0.16956171	9.10718540	1.54422993		48.00000000	0.71541667	6.51543222	1.046430
49	0.17938258	9.11169340	1.63447907		49.00000000	0.70081633	6.38562350	1.067801
50	0.18950857	9.10634610	1.72573063		50.00000000	0.68680000	6.25423850	1.089179
51	0.19931082	9.10191820	1.81411078		51.00000000	0.67333333	6.12862492	1.110655
52	0.20943013	9.10484220	1.90682829		52.00000000	0.66038462	6.01269771	1.132085
53	0.21928002	9.10048770	1.99555512		53.00000000	0.64792453	5.89642920	1.153472
54	0.22941346	9.09194470	2.08581449		54.00000000	0.63592593	5.78180335	1.174814
55	0.23922986	9.10324000	2.17776683		55.00000000	0.62436364	5.68373203	1.196288
56	0.24938415	9.09428120	2.26796959		56.00000000	0.61321429	5.57674315	1.217666
57	0.25955108	9.09174160	2.35977135		57.00000000	0.60245614	5.47737555	1.239038
58	0.26935631	9.09614090	2.45010295		58.00000000	0.59206897	5.38554273	1.260529
59	0.27951655	9.10121060	2.54393899		59.00000000	0.58203390	5.29721308	1.281899
60	0.28931135	9.10134600	2.63312270		60.00000000	0.57233333	5.20900369	1.303249
61	0.29944852	9.09265610	2.72278241		61.00000000	0.56295082	5.11871820	1.324638
62	0.30925897	9.10710720	2.81645459		62.00000000	0.55387097	5.04416228	1.346130
63	0.31942889	9.09556960	2.90538770		63.00000000	0.54507937	4.95780730	1.367515
64	0.32926762	9.10390280	2.99762041		64.00000000	0.53656250	4.88481285	1.388871
65	0.33939511	9.09220700	3.08585059		65.00000000	0.52830769	4.80348290	1.410245
66	0.34921297	9.10556510	3.17978143		66.00000000	0.52030303	4.73765311	1.431719
67	0.35937619	9.09773250	3.26950844		67.00000000	0.51253731	4.66292737	1.453111
68	0.36954686	9.09898760	3.36250230		68.00000000	0.50500000	4.59498874	1.474458
69	0.37931934	9.09075160	3.44829790		69.00000000	0.49768116	4.52429580	1.495846
70	0.38948032	9.10688020	3.54695061		70.00000000	0.49057143	4.46757523	1.517329
71	0.39932722	9.07081510	3.62222338		71.00000000	0.48366197	4.38720832	1.538706
72	0.40946066	9.10228060	3.72702582		72.00000000	0.47694444	4.34128216	1.560062
73	0.41928676	9.08463480	3.80906709		73.00000000	0.47041096	4.27351177	1.581438
74	0.42941722	9.08476540	3.90115470		74.00000000	0.46405405	4.21582221	1.602915
75	0.43923658	9.08142570	3.98889437		75.00000000	0.45786667	4.15808211	1.624314
76	0.44941691	9.07886220	4.08019420		76.00000000	0.45184211	4.10221221	1.645669
77	0.45952505	9.06797120	4.16695992		77.00000000	0.44597403	4.04407962	1.667043
78	0.46940768	9.05611320	4.25100909		78.00000000	0.44025641	3.98701189	1.688520
79	0.47955081	9.05560400	4.34262223		79.00000000	0.43468354	3.93632204	1.709893
80	0.48936647	9.02743630	4.41772464		80.00000000	0.42925000	3.87502703	1.731256
81	0.49952447	9.02212620	4.50677281		81.00000000	0.42395062	3.82493597	1.752630
82	0.50932819	9.00906660	4.58857158		82.00000000	0.41878049	3.77282131	1.774103
83	0.51946759	8.98076060	4.66521407		83.00000000	0.41373494	3.71565445	1.795478
84	0.52921551	8.93896100	4.73063680		84.00000000	0.40880952	3.65433239	1.816873
85	0.53937650	8.89391710	4.79716988		85.00000000	0.40400000	3.59314251	1.838225
86	0.54952633	8.81169800	4.84226006		86.00000000	0.39930233	3.51853150	1.859697
87	0.55934644	8.72026440	4.87764885		87.00000000	0.39471264	3.44199861	1.881084
88	0.56945533	8.57368950	4.88233318		88.00000000	0.39022727	3.34568747	1.902474
89	0.57928735	8.38051220	4.85472470		89.00000000	0.38584270	3.23355943	1.923961
90	0.58939701	8.13090520	4.79233121		90.00000000	0.38155556	3.10239205	1.945381
91	0.59922081	7.78362700	4.66411128		91.00000000	0.37736264	2.93725001	1.966725
92	0.60932750	7.29683350	4.44616131		92.00000000	0.37326087	2.72362242	1.988214
93	0.61911857	6.69171760	4.14296663		93.00000000	0.36924731	2.47089874	2.009731
94	0.62923789	5.86499170	3.69047500		94.00000000	0.36531915	2.14259378	2.031107
95	0.63934976	4.80244450	3.07044174		95.00000000	0.36147368	1.73595731	2.052498
96	0.64914531	3.48213290	2.26041024		96.00000000	0.35770833	1.24558796	2.073919
97	0.65921992	1.80959680	1.19292226		97.00000000	0.35402062	0.64063458	2.095410
98	0.66898423	-0.19993937	-0.13375629		98.00000000	0.35040816	-0.07006039	2.116811
99	0.67906410	-2.65350340	-1.80189890		99.00000000	0.34686869	-0.92041724	2.138160
100	0.68875325	-5.50375370	-3.79072825		100.00000000	0.34340000	-1.88998902	2.159537
101	0.69904667	-8.96893600	-6.26970484		101.00000000	0.34000000	-3.04943824	2.181011
