# Supplementary material for: Study on the Electrical Injection Regeneration of Industrialized B-Doped Czochralski Silicon PERC Solar Cells
Source: Hindawi journal article supplement (doi:10.1155/2019/5357370), 2019-06-20
Supplement: f1 [file 5357370.f1.zip › section3.3/IVRawData_3-12-5h.csv]

03:24 04/04/2018
Test Lot:	JK-PERC
Recipe:	Recipe_YJX-LID
Cell Name:	3-12-5h
Test Order:	2
Test Condition:	Light
1	-0.29993466	9.10965440	-2.73230110		1.00000000	34.34000000	312.82553210	0.000000
2	-0.29010826	9.10889720	-2.64256632		2.00000000	17.17000000	156.39976492	0.061774
3	-0.27998492	9.10912040	-2.55041635		3.00000000	11.44666667	104.26906485	0.083196
4	-0.27015108	9.10771850	-2.46045999		4.00000000	8.58500000	78.18976332	0.104696
5	-0.25998977	9.11092000	-2.36874600		5.00000000	6.86800000	62.57379856	0.126079
6	-0.24983442	9.10683250	-2.27520022		6.00000000	5.72333333	52.12143801	0.147439
7	-0.24000877	9.10444740	-2.18514722		7.00000000	4.90571429	44.66381767	0.168811
8	-0.22987576	9.10287380	-2.09253003		8.00000000	4.29250000	39.07408579	0.190340
9	-0.22003150	9.11752510	-2.00614272		9.00000000	3.81555556	34.78842355	0.211737
10	-0.20988210	9.10923100	-1.91186453		10.00000000	3.43400000	31.28109925	0.233092
11	-0.20006984	9.11597160	-1.82383098		11.00000000	3.12181818	28.45840589	0.254464
12	-0.18993311	9.11014370	-1.73031793		12.00000000	2.86166667	26.07019455	0.275941
13	-0.18013127	9.11066440	-1.64111555		13.00000000	2.64153846	24.06617042	0.297319
14	-0.17002876	9.10677430	-1.54841354		14.00000000	2.45285714	22.33761639	0.318654
15	-0.16016962	9.11342330	-1.45969355		15.00000000	2.28933333	20.86366374	0.340043
16	-0.15001205	9.10355000	-1.36564220		16.00000000	2.14625000	19.53849419	0.361525
17	-0.13988422	9.11452960	-1.27497886		17.00000000	2.02000000	18.41134979	0.382892
18	-0.13004667	9.11285210	-1.18509607		18.00000000	1.90777778	17.38529673	0.404259
19	-0.11991588	9.11223320	-1.09270146		19.00000000	1.80736842	16.46916253	0.425633
20	-0.11010735	9.10120960	-1.00211007		20.00000000	1.71700000	15.62677688	0.447171
21	-0.09996614	9.10595990	-0.91028765		21.00000000	1.63523810	14.89041252	0.468555
22	-0.09015463	9.11529250	-0.82178585		22.00000000	1.56090909	14.22814293	0.489895
23	-0.08000523	9.10482790	-0.72843384		23.00000000	1.49304348	13.59390392	0.511268
24	-0.07019745	9.11435410	-0.63980440		24.00000000	1.43083333	13.04112166	0.532739
25	-0.06003391	9.10140990	-0.54639319		25.00000000	1.37360000	12.50169664	0.554149
26	-0.04989567	9.10968780	-0.45453401		26.00000000	1.32076923	12.03179535	0.575546
27	-0.04005514	9.10974790	-0.36489224		27.00000000	1.27185185	11.58624974	0.596898
28	-0.02990277	9.10954950	-0.27240073		28.00000000	1.22642857	11.17221178	0.618373
29	-0.02010986	9.09793090	-0.18295815		29.00000000	1.18413793	10.77320507	0.639773
30	-0.00995749	9.10679910	-0.09068086		30.00000000	1.14466667	10.42424937	0.661162
31	-0.00068036	9.10278220	-0.00619315		31.00000000	1.10774194	10.08353357	0.682647
32	0.00945767	9.11267570	0.08618468		32.00000000	1.07312500	9.77904011	0.704123
33	0.01929718	9.11644740	0.17592170		33.00000000	1.04060606	9.48663042	0.725504
34	0.02941726	9.10860630	0.26795025		34.00000000	1.01000000	9.19969236	0.746888
35	0.03923221	9.11029720	0.35741708		35.00000000	0.98114286	8.93850302	0.768365
36	0.04939844	9.10976790	0.45000830		36.00000000	0.95388889	8.68970638	0.789731
37	0.05924688	9.11087320	0.53979077		37.00000000	0.92810811	8.45587529	0.811094
38	0.06938035	9.10507490	0.63171328		38.00000000	0.90368421	8.22811242	0.832505
39	0.07954063	9.11542610	0.72504669		39.00000000	0.88051282	8.02624955	0.853985
40	0.08935111	9.10219760	0.81329146		40.00000000	0.85850000	7.81423664	0.875373
41	0.09950022	9.10346320	0.90579656		41.00000000	0.83756098	7.62470552	0.896715
42	0.10928540	9.11745830	0.99640508		42.00000000	0.81761905	7.45460757	0.918119
43	0.11947990	9.09988020	1.08725278		43.00000000	0.79860465	7.26720665	0.939601
44	0.12929188	9.10518170	1.17722606		44.00000000	0.78045455	7.10618044	0.960985
45	0.13945214	9.10754010	1.27006596		45.00000000	0.76311111	6.95006505	0.982329
46	0.14928123	9.11067100	1.36005217		46.00000000	0.74652174	6.80131396	1.003708
47	0.15939015	9.10146520	1.45068390		47.00000000	0.73063830	6.64987904	1.025184
48	0.16955043	9.10584450	1.54389985		48.00000000	0.71541667	6.51447292	1.046558
49	0.17936613	9.11434750	1.63480524		49.00000000	0.70081633	6.38748353	1.067908
50	0.18952341	9.10822300	1.72622148		50.00000000	0.68680000	6.25552756	1.089279
51	0.19927511	9.10316560	1.81403433		51.00000000	0.67333333	6.12946484	1.110757
52	0.20945100	9.11478810	1.90910148		52.00000000	0.66038462	6.01926583	1.132133
53	0.21924883	9.10683920	1.99666384		53.00000000	0.64792453	5.90054449	1.153476
54	0.22940017	9.11620520	2.09125902		54.00000000	0.63592593	5.79723123	1.174847
55	0.23922777	9.11414240	2.18035596		55.00000000	0.62436364	5.69053909	1.196336
56	0.24939698	9.10584450	2.27097012		56.00000000	0.61321429	5.58383393	1.217715
57	0.25950068	9.12347980	2.36754921		57.00000000	0.60245614	5.49649643	1.239100
58	0.26934540	9.09315590	2.44919971		58.00000000	0.59206897	5.38377541	1.260454
59	0.27949452	9.12087440	2.54923441		59.00000000	0.58203390	5.30865808	1.281922
60	0.28930277	9.10985850	2.63550730		60.00000000	0.57233333	5.21387568	1.303353
61	0.29946154	9.11042590	2.72822217		61.00000000	0.56295082	5.12872173	1.324749
62	0.30925342	9.11065290	2.81750057		62.00000000	0.55387097	5.04612614	1.346119
63	0.31945315	9.09556580	2.90560715		63.00000000	0.54507937	4.95780523	1.367599
64	0.32925543	9.11493870	3.00114306		64.00000000	0.53656250	4.89073430	1.388968
65	0.33939040	9.10254000	3.08931469		65.00000000	0.52830769	4.80894190	1.410346
66	0.34921056	9.10949610	3.18113223		66.00000000	0.52030303	4.73969843	1.431826
67	0.35935372	9.09517860	3.26838626		67.00000000	0.51253731	4.66161840	1.453208
68	0.36951101	9.09947110	3.36235476		68.00000000	0.50500000	4.59523291	1.474570
69	0.37932077	9.09739970	3.45083266		69.00000000	0.49768116	4.52760443	1.495942
70	0.38947284	9.10437390	3.54590636		70.00000000	0.49057143	4.46634571	1.517421
71	0.39932796	9.08631990	3.62842159		71.00000000	0.48366197	4.39470740	1.538815
72	0.40945178	9.10969160	3.72997944		72.00000000	0.47694444	4.34481680	1.560164
73	0.41928756	9.08151050	3.80776438		73.00000000	0.47041096	4.27204206	1.581560
74	0.42947909	9.09478950	3.90602192		74.00000000	0.46405405	4.22047394	1.603043
75	0.43924344	9.08675380	3.99129700		75.00000000	0.45786667	4.16052167	1.624420
76	0.44938213	9.08309560	4.08178085		76.00000000	0.45184211	4.10412504	1.645764
77	0.45952454	9.06694220	4.16648244		77.00000000	0.44597403	4.04362072	1.667149
78	0.46942210	9.07868670	4.26173618		78.00000000	0.44025641	3.99695002	1.688633
79	0.47954220	9.06099800	4.34513092		79.00000000	0.43468354	3.93866673	1.710025
80	0.48934448	9.05078220	4.42895031		80.00000000	0.42925000	3.88504826	1.731380
81	0.49951294	9.03420160	4.51270060		81.00000000	0.42395062	3.83005534	1.752753
82	0.50933158	9.01812650	4.59321662		82.00000000	0.41878049	3.77661541	1.774234
83	0.51945764	8.98385720	4.66673326		83.00000000	0.41373494	3.71693562	1.795613
84	0.52926815	8.94779590	4.73578338		84.00000000	0.40880952	3.65794418	1.816956
85	0.53939861	8.89384170	4.79732585		85.00000000	0.40400000	3.59311205	1.838341
86	0.54952019	8.81739900	4.84533877		86.00000000	0.39930233	3.52080793	1.859807
87	0.55933887	8.72333720	4.87930157		87.00000000	0.39471264	3.44321149	1.881182
88	0.56947309	8.58226110	4.88736675		88.00000000	0.39022727	3.34903234	1.902549
89	0.57927018	8.39052680	4.86038197		89.00000000	0.38584270	3.23742349	1.923910
90	0.58940589	8.12526040	4.78907634		90.00000000	0.38155556	3.10023825	1.945376
91	0.59919852	7.78149270	4.66265891		91.00000000	0.37736264	2.93644461	1.966759
92	0.60932380	7.30347390	4.45018047		92.00000000	0.37326087	2.72610102	1.988246
93	0.61911494	6.68474910	4.13862804		93.00000000	0.36924731	2.46832564	2.009633
94	0.62922835	5.85254190	3.68258528		94.00000000	0.36531915	2.13804563	2.031129
95	0.63934171	4.76376010	3.04567053		95.00000000	0.36147368	1.72197391	2.052538
96	0.64914626	3.47455670	2.25549549		96.00000000	0.35770833	1.24287789	2.073937
97	0.65925294	1.78592930	1.17737914		97.00000000	0.35402062	0.63225580	2.095434
98	0.66894209	-0.21069880	-0.14094530		98.00000000	0.35040816	-0.07383058	2.116814
99	0.67902350	-2.65581820	-1.80336297		99.00000000	0.34686869	-0.92122017	2.138187
100	0.68875957	-5.47689100	-3.77226109		100.00000000	0.34340000	-1.88076437	2.159558
101	0.69900095	-8.90154650	-6.22218946		101.00000000	0.34000000	-3.02652581	2.181071
03:24 04/04/2018
Test Lot:	JK-PERC
Recipe:	Recipe_YJX-LID
Cell Name:	3-12-5h
Test Order:	3
Test Condition:	Light
1	-0.29987955	9.11068920	-2.73210938		1.00000000	34.34000000	312.86106713	0.000000
2	-0.29009858	9.10773370	-2.64214061		2.00000000	17.17000000	156.37978763	0.061778
3	-0.27997151	9.11130140	-2.55090481		3.00000000	11.44666667	104.29403003	0.083251
4	-0.27011907	9.10678860	-2.45991727		4.00000000	8.58500000	78.18178013	0.104757
5	-0.25995031	9.09724140	-2.36483072		5.00000000	6.86800000	62.47985394	0.126144
6	-0.24981581	9.11824800	-2.27788251		6.00000000	5.72333333	52.18677272	0.147504
7	-0.23998569	9.09779170	-2.18333982		7.00000000	4.90571429	44.63116671	0.168882
8	-0.22983034	9.12398530	-2.09696864		8.00000000	4.29250000	39.16470690	0.190367
9	-0.22003372	9.10000610	-2.00230819		9.00000000	3.81555556	34.72157883	0.211746
10	-0.20986423	9.11787410	-1.91351563		10.00000000	3.43400000	31.31077966	0.233091
11	-0.20006612	9.11284540	-1.82317162		11.00000000	3.12181818	28.44864646	0.254469
12	-0.18989365	9.10646820	-1.72926049		12.00000000	2.86166667	26.05967650	0.275943
13	-0.18011191	9.09714130	-1.63850350		13.00000000	2.64153846	24.03044863	0.297324
14	-0.16995804	9.10656830	-1.54773450		14.00000000	2.45285714	22.33711110	0.318681
15	-0.16012794	9.08894350	-1.45539380		15.00000000	2.28933333	20.80762132	0.340052
16	-0.14997184	9.11178590	-1.36651130		16.00000000	2.14625000	19.55617049	0.361531
17	-0.13984030	9.11165240	-1.27417621		17.00000000	2.02000000	18.40553785	0.382922
18	-0.13001838	9.09786890	-1.18289018		18.00000000	1.90777778	17.35671211	0.404262
19	-0.11987121	9.12044720	-1.09327904		19.00000000	1.80736842	16.48400826	0.425624
20	-0.11003887	9.09777830	-1.00110924		20.00000000	1.71700000	15.62088534	0.447099
21	-0.09988649	9.11432740	-0.91039819		21.00000000	1.63523810	14.90409538	0.468482
22	-0.09008764	9.08371260	-0.81833020		22.00000000	1.56090909	14.17884958	0.489839
23	-0.07992633	9.11544900	-0.72856442		23.00000000	1.49304348	13.60976168	0.511209
24	-0.07008729	9.10232450	-0.63795727		24.00000000	1.43083333	13.02390931	0.532694
25	-0.05997734	9.10567380	-0.54613408		25.00000000	1.37360000	12.50755353	0.554082
26	-0.04980115	9.09845640	-0.45311357		26.00000000	1.32076923	12.01696126	0.575473
27	-0.03998146	9.10741140	-0.36412756		27.00000000	1.27185185	11.58327805	0.596818
28	-0.02986927	9.10606480	-0.27199152		28.00000000	1.22642857	11.16793804	0.618290
29	-0.02001758	9.11161710	-0.18239248		29.00000000	1.18413793	10.78941142	0.639657
30	-0.00987636	9.09989260	-0.08987386		30.00000000	1.14466667	10.41634373	0.661024
31	-0.00066101	9.11518380	-0.00602520		31.00000000	1.10774194	10.09727134	0.682546
32	0.00950902	9.10270310	0.08655780		32.00000000	1.07312500	9.76833826	0.704008
33	0.01933439	9.09421350	0.17583106		33.00000000	1.04060606	9.46349368	0.725375
34	0.02943512	9.11364840	0.26826134		34.00000000	1.01000000	9.20478488	0.746761
35	0.03931333	9.11452770	0.35832242		35.00000000	0.98114286	8.94265375	0.768230
36	0.04943043	9.09950920	0.44979269		36.00000000	0.95388889	8.67992072	0.789618
37	0.05927217	9.10393520	0.53961003		37.00000000	0.92810811	8.44943607	0.810959
38	0.06939896	9.10578920	0.63193225		38.00000000	0.90368421	8.22875792	0.832334
39	0.07957263	9.11664870	0.72543567		39.00000000	0.88051282	8.02732606	0.853815
40	0.08938161	9.09358600	0.81279938		40.00000000	0.85850000	7.80684358	0.875206
41	0.09955305	9.10280700	0.90621219		41.00000000	0.83756098	7.62415591	0.896554
42	0.10934195	9.09523870	0.99449114		42.00000000	0.81761905	7.43644040	0.917931
43	0.11951189	9.11746310	1.08964525		43.00000000	0.79860465	7.28124844	0.939407
44	0.12932982	9.10335920	1.17733581		44.00000000	0.78045455	7.10475807	0.960775
45	0.13944693	9.09413050	1.26814858		45.00000000	0.76311111	6.93983203	0.982131
46	0.14928196	9.10468290	1.35916491		46.00000000	0.74652174	6.79684371	1.003510
47	0.15947127	9.10144520	1.45141902		47.00000000	0.73063830	6.64986443	1.024981
48	0.16958465	9.10325430	1.54377219		48.00000000	0.71541667	6.51261985	1.046364
49	0.17943533	9.10725780	1.63416381		49.00000000	0.70081633	6.38251496	1.067710
50	0.18956657	9.10237310	1.72550565		50.00000000	0.68680000	6.25150985	1.089087
51	0.19937184	9.10689260	1.81565793		51.00000000	0.67333333	6.13197435	1.110566
52	0.20950085	9.10480310	1.90746399		52.00000000	0.66038462	6.01267189	1.131942
53	0.21932623	9.10301690	1.99653038		53.00000000	0.64792453	5.89806793	1.153300
54	0.22945225	9.10358810	2.08883877		54.00000000	0.63592593	5.78920769	1.174681
55	0.23929548	9.10529040	2.17885484		55.00000000	0.62436364	5.68501222	1.196154
56	0.24941558	9.10473250	2.27086214		56.00000000	0.61321429	5.58315204	1.217535
57	0.25960934	9.10897350	2.36477460		57.00000000	0.60245614	5.48775702	1.238937
58	0.26939899	9.10132120	2.45188674		58.00000000	0.59206897	5.38860983	1.260297
59	0.27957338	9.11619470	2.54864537		59.00000000	0.58203390	5.30593434	1.281764
60	0.28938833	9.08421990	2.62886723		60.00000000	0.57233333	5.19920186	1.303140
61	0.29952478	9.10701940	2.72777798		61.00000000	0.56295082	5.12680404	1.324517
62	0.30934867	9.10255150	2.81586220		62.00000000	0.55387097	5.04163901	1.345877
63	0.31947917	9.10394860	2.90852194		63.00000000	0.54507937	4.96237452	1.367356
64	0.32929412	9.09802720	2.99592686		64.00000000	0.53656250	4.88166022	1.388737
65	0.33943579	9.09928040	3.08862143		65.00000000	0.52830769	4.80721983	1.410120
66	0.34926710	9.09157660	3.17538859		66.00000000	0.52030303	4.73037486	1.431608
67	0.35940802	9.10350420	3.27187242		67.00000000	0.51253731	4.66588559	1.452987
68	0.36959061	9.08866980	3.35908702		68.00000000	0.50500000	4.58977825	1.474337
69	0.37940037	9.09813880	3.45183723		69.00000000	0.49768116	4.52797227	1.495706
70	0.38954350	9.09831910	3.54419107		70.00000000	0.49057143	4.46337540	1.517184
71	0.39936739	9.09917550	3.63391397		71.00000000	0.48366197	4.40092516	1.538558
72	0.40952915	9.08624650	3.72108281		72.00000000	0.47694444	4.33363479	1.559894
73	0.41933295	9.08772180	3.81078119		73.00000000	0.47041096	4.27496393	1.581276
74	0.42947090	9.08119960	3.90011097		74.00000000	0.46405405	4.21416749	1.602755
75	0.43930742	9.08773520	3.99230950		75.00000000	0.45786667	4.16097102	1.624135
76	0.44945502	9.08888340	4.08504427		76.00000000	0.45184211	4.10674021	1.645500
77	0.45959669	9.06787300	4.16756442		77.00000000	0.44597403	4.04403583	1.666868
78	0.46944588	9.07011320	4.25792727		78.00000000	0.44025641	3.99317548	1.688336
79	0.47958532	9.05407810	4.34220294		79.00000000	0.43468354	3.93565876	1.709715
80	0.48937869	9.03974060	4.42385641		80.00000000	0.42925000	3.88030865	1.731056
81	0.49954787	9.03333000	4.51258076		81.00000000	0.42395062	3.82968583	1.752438
82	0.50938290	9.00853350	4.58879292		82.00000000	0.41878049	3.77259805	1.773925
83	0.51950151	8.97712610	4.66363056		83.00000000	0.41373494	3.71415073	1.795301
84	0.52928448	8.93661020	4.73000908		84.00000000	0.40880952	3.65337136	1.816651
85	0.53941047	8.87905600	4.78945577		85.00000000	0.40400000	3.58713862	1.838029
86	0.54958713	8.83157920	4.85372227		86.00000000	0.39930233	3.52647011	1.859492
87	0.55936486	8.71196370	4.87316636		87.00000000	0.39471264	3.43872222	1.880888
88	0.56953037	8.57187840	4.88194508		88.00000000	0.39022727	3.34498073	1.902252
89	0.57932669	8.39840700	4.86542133		89.00000000	0.38584270	3.24046400	1.923611
90	0.58945197	8.12027840	4.78651410		90.00000000	0.38155556	3.09833734	1.945086
91	0.59926176	7.77876280	4.66151509		91.00000000	0.37736264	2.93541445	1.966453
92	0.60939002	7.30177450	4.44962851		92.00000000	0.37326087	2.72546670	1.987925
93	0.61916107	6.67991450	4.13594301		93.00000000	0.36924731	2.46654047	2.009293
94	0.62927514	5.85331960	3.68334851		94.00000000	0.36531915	2.13832973	2.030780
95	0.63941908	4.77792070	3.05509366		95.00000000	0.36147368	1.72709260	2.052160
96	0.64915514	3.47020550	2.25270174		96.00000000	0.35770833	1.24132143	2.073551
97	0.65928787	1.78571750	1.17730189		97.00000000	0.35402062	0.63218081	2.095071
98	0.66899341	-0.20374499	-0.13630406		98.00000000	0.35040816	-0.07139391	2.116472
99	0.67910159	-2.65844130	-1.80535171		99.00000000	0.34686869	-0.92213004	2.137817
100	0.68884730	-5.48490520	-3.77826214		100.00000000	0.34340000	-1.88351645	2.159186
101	0.69909912	-8.90261940	-6.22381339		101.00000000	0.34000000	-3.02689060	2.180677
03:24 04/04/2018
Test Lot:	JK-PERC
Recipe:	Recipe_YJX-LID
Cell Name:	3-12-5h
Test Order:	4
Test Condition:	Light
1	-0.29992956	9.10903840	-2.73206988		1.00000000	34.34000000	312.80437866	0.000000
2	-0.29012758	9.09917350	-2.63992119		2.00000000	17.17000000	156.23280900	0.061789
3	-0.27997133	9.11233900	-2.55119367		3.00000000	11.44666667	104.30590709	0.083205
4	-0.27016637	9.10530850	-2.45994815		4.00000000	8.58500000	78.16907347	0.104627
5	-0.26001012	9.09673690	-2.36524365		5.00000000	6.86800000	62.47638903	0.126115
6	-0.24986281	9.11667630	-2.27791836		6.00000000	5.72333333	52.17777736	0.147496
7	-0.24002510	9.10565380	-2.18558546		7.00000000	4.90571429	44.66973593	0.168891
8	-0.22987033	9.11164670	-2.09449723		8.00000000	4.29250000	39.11174346	0.190238
9	-0.22009292	9.11069200	-2.00519881		9.00000000	3.81555556	34.76235148	0.211708
10	-0.20990987	9.10568050	-1.91137221		10.00000000	3.43400000	31.26890684	0.233073
11	-0.20010269	9.09991930	-1.82091833		11.00000000	3.12181818	28.40829352	0.254454
12	-0.18995686	9.12314700	-1.73300436		12.00000000	2.86166667	26.10740567	0.275947
13	-0.18017423	9.10574250	-1.64062014		13.00000000	2.64153846	24.05316903	0.297318
14	-0.17001575	9.11333560	-1.54941059		14.00000000	2.45285714	22.35371032	0.318660
15	-0.16021004	9.11167810	-1.45978231		15.00000000	2.28933333	20.85966840	0.340053
16	-0.15005156	9.10038470	-1.36552692		16.00000000	2.14625000	19.53170066	0.361535
17	-0.13991541	9.11168860	-1.27486565		17.00000000	2.02000000	18.40561097	0.382912
18	-0.13006431	9.11091900	-1.18500539		18.00000000	1.90777778	17.38160880	0.404266
19	-0.11992145	9.10312560	-1.09166002		19.00000000	1.80736842	16.45270174	0.425647
20	-0.11008374	9.10176180	-1.00195598		20.00000000	1.71700000	15.62772501	0.447122
21	-0.09993494	9.10409830	-0.90981748		21.00000000	1.63523810	14.88736836	0.468498
22	-0.09010840	9.11280350	-0.82114010		22.00000000	1.56090909	14.22425783	0.489842
23	-0.07997373	9.09832380	-0.72762686		23.00000000	1.49304348	13.58419301	0.511221
24	-0.07013826	9.10025500	-0.63827606		24.00000000	1.43083333	13.02094820	0.532701
25	-0.06001773	9.11042500	-0.54678704		25.00000000	1.37360000	12.51407978	0.554072
26	-0.04980641	9.10814000	-0.45364371		26.00000000	1.32076923	12.02975106	0.575424
27	-0.04002080	9.11990070	-0.36498573		27.00000000	1.27185185	11.59916259	0.596805
28	-0.02988092	9.10262300	-0.27199479		28.00000000	1.22642857	11.16371692	0.618278
29	-0.02006332	9.10264300	-0.18262919		29.00000000	1.18413793	10.77878485	0.639667
30	-0.00991079	9.10511780	-0.09023887		30.00000000	1.14466667	10.42232484	0.661016
31	-0.00064319	9.10919670	-0.00585893		31.00000000	1.10774194	10.09063918	0.682509
32	0.00951434	9.11557200	0.08672867		32.00000000	1.07312500	9.78214820	0.704010
33	0.01931902	9.10081860	0.17581890		33.00000000	1.04060606	9.47036699	0.725390
34	0.02945563	9.10449890	0.26817875		34.00000000	1.01000000	9.19554389	0.746750
35	0.03924765	9.10369110	0.35729852		35.00000000	0.98114286	8.93202150	0.768118
36	0.04942818	9.11780450	0.45067645		36.00000000	0.95388889	8.69737240	0.789608
37	0.05924774	9.09793660	0.53903218		37.00000000	0.92810811	8.44386873	0.810993
38	0.06936872	9.10951040	0.63191508		38.00000000	0.90368421	8.23212071	0.832376
39	0.07951947	9.09857270	0.72351371		39.00000000	0.88051282	8.01140991	0.853725
40	0.08934797	9.11456580	0.81436792		40.00000000	0.85850000	7.82485474	0.875188
41	0.09949723	9.09495450	0.90492277		41.00000000	0.83756098	7.61757896	0.896569
42	0.10931456	9.12500760	0.99749619		42.00000000	0.81761905	7.46078002	0.917954
43	0.11945191	9.10054210	1.08707714		43.00000000	0.79860465	7.26773525	0.939438
44	0.12929082	9.10955050	1.17778125		44.00000000	0.78045455	7.10959009	0.960810
45	0.13941330	9.09765430	1.26833401		45.00000000	0.76311111	6.94252108	0.982159
46	0.14924774	9.10726260	1.35923836		46.00000000	0.74652174	6.79876951	1.003540
47	0.15939999	9.10297010	1.45101334		47.00000000	0.73063830	6.65097858	1.025012
48	0.16953585	9.09901330	1.54260895		48.00000000	0.71541667	6.50958577	1.046385
49	0.17936210	9.10411170	1.63293259		49.00000000	0.70081633	6.38031012	1.067744
50	0.18948978	9.10647300	1.72558357		50.00000000	0.68680000	6.25432566	1.089116
51	0.19931976	9.09973720	1.81375743		51.00000000	0.67333333	6.12715638	1.110585
52	0.20945564	9.08951380	1.90384993		52.00000000	0.66038462	6.00257507	1.131965
53	0.21928264	9.11028480	1.99772730		53.00000000	0.64792453	5.90277698	1.153311
54	0.22943711	9.10028840	2.08794387		54.00000000	0.63592593	5.78710933	1.174688
55	0.23922616	9.10904980	2.17912300		55.00000000	0.62436364	5.68735946	1.196173
56	0.24941264	9.09172820	2.26759193		56.00000000	0.61321429	5.57517761	1.217563
57	0.25952914	9.11481760	2.36556077		57.00000000	0.60245614	5.49127783	1.238927
58	0.26938593	9.09083370	2.44894269		58.00000000	0.59206897	5.38240050	1.260299
59	0.27950543	9.10147670	2.54391216		59.00000000	0.58203390	5.29736796	1.281794
60	0.28933540	9.09065720	2.63024894		60.00000000	0.57233333	5.20288614	1.303184
61	0.29948914	9.11666970	2.73034357		61.00000000	0.56295082	5.13223668	1.324531
62	0.30930275	9.09635640	2.81352805		62.00000000	0.55387097	5.03820772	1.345908
63	0.31945053	9.10436060	2.90839282		63.00000000	0.54507937	4.96259910	1.367396
64	0.32928795	9.10476110	2.99808812		64.00000000	0.53656250	4.88527338	1.388785
65	0.33942679	9.10914330	3.09188727		65.00000000	0.52830769	4.81243048	1.410150
66	0.34921584	9.08292200	3.17190024		66.00000000	0.52030303	4.72587184	1.431510
67	0.35938445	9.10351090	3.27166026		67.00000000	0.51253731	4.66588902	1.453004
68	0.36952627	9.09138110	3.35950415		68.00000000	0.50500000	4.59114746	1.474385
69	0.37936518	9.09833240	3.45159051		69.00000000	0.49768116	4.52806862	1.495778
70	0.38947871	9.08009820	3.53650493		70.00000000	0.49057143	4.45443675	1.517126
71	0.39933994	9.09099770	3.63039848		71.00000000	0.48366197	4.39696987	1.538588
72	0.40946242	9.09354400	3.72346453		72.00000000	0.47694444	4.33711529	1.559959
73	0.41928273	9.09860900	3.81488962		73.00000000	0.47041096	4.28008538	1.581345
74	0.42945433	9.08013440	3.89950304		74.00000000	0.46405405	4.21367318	1.602827
75	0.43924636	9.09354110	3.99430483		75.00000000	0.45786667	4.16362935	1.624205
76	0.44938892	9.07884310	4.07993150		76.00000000	0.45184211	4.10220358	1.645541
77	0.45952702	9.06891440	4.16741121		77.00000000	0.44597403	4.04450027	1.666921
78	0.46942174	9.06307220	4.25440312		78.00000000	0.44025641	3.99007563	1.688393
79	0.47954795	9.06817050	4.34862257		79.00000000	0.43468354	3.94178449	1.709771
80	0.48933697	9.03708930	4.42218190		80.00000000	0.42925000	3.87917058	1.731106
81	0.49949890	9.04054160	4.51574058		81.00000000	0.42395062	3.83274319	1.752486
82	0.50933111	9.00114150	4.58456139		82.00000000	0.41878049	3.76950243	1.773961
83	0.51942974	8.99721910	4.67342318		83.00000000	0.41373494	3.72246390	1.795333
84	0.52925307	8.93695550	4.72991113		84.00000000	0.40880952	3.65351252	1.816674
85	0.53939039	8.89082240	4.79562416		85.00000000	0.40400000	3.59189225	1.838073
86	0.54956126	8.82149890	4.84795405		86.00000000	0.39930233	3.52244503	1.859545
87	0.55935925	8.72692970	4.88148885		87.00000000	0.39471264	3.44462949	1.880941
88	0.56945640	8.57923320	4.88549925		88.00000000	0.39022727	3.34785077	1.902311
89	0.57928562	8.39446160	4.86279089		89.00000000	0.38584270	3.23894170	1.923682
90	0.58942449	8.12270360	4.78772043		90.00000000	0.38155556	3.09926268	1.945158
91	0.59923810	7.79453900	4.67078474		91.00000000	0.37736264	2.94136779	1.966542
92	0.60932779	7.30676320	4.45221387		92.00000000	0.37326087	2.72732879	1.988007
93	0.61915183	6.68244700	4.13744929		93.00000000	0.36924731	2.46747559	2.009402
94	0.62925643	5.86269430	3.68913809		94.00000000	0.36531915	2.14175449	2.030896
95	0.63934690	4.77810290	3.05486528		95.00000000	0.36147368	1.72715846	2.052264
96	0.64915007	3.47280030	2.25436856		96.00000000	0.35770833	1.24224961	2.073637
97	0.65923089	1.78339520	1.17566920		97.00000000	0.35402062	0.63135867	2.095062
98	0.66898572	-0.21241350	-0.14210160		98.00000000	0.35040816	-0.07443142	2.116553
99	0.67907989	-2.67458750	-1.81625859		99.00000000	0.34686869	-0.92773065	2.137946
100	0.68876326	-5.51474380	-3.79835292		100.00000000	0.34340000	-1.89376302	2.159324
101	0.69903386	-8.94184300	-6.25065103		101.00000000	0.34000000	-3.04022662	2.180670
