# Supplementary material for: Study on the Electrical Injection Regeneration of Industrialized B-Doped Czochralski Silicon PERC Solar Cells
Source: Hindawi journal article supplement (doi:10.1155/2019/5357370), 2019-06-20
Supplement: f1 [file 5357370.f1.zip › section3.3/IVRawData_3-12-6h.csv]

04:26 04/04/2018
Test Lot:	JK-PERC
Recipe:	Recipe_YJX-LID
Cell Name:	3-12-6h
Test Order:	2
Test Condition:	Light
1	-0.29989237	9.10230830	-2.72971281		1.00000000	34.34000000	312.57326702	0.000000
2	-0.29007247	9.08448510	-2.63515903		2.00000000	17.17000000	155.98060917	0.061740
3	-0.27994892	9.09637070	-2.54651915		3.00000000	11.44666667	104.12312328	0.083209
4	-0.27010968	9.10263060	-2.45870864		4.00000000	8.58500000	78.14608370	0.104657
5	-0.25999731	9.09012410	-2.36340781		5.00000000	6.86800000	62.43097232	0.126019
6	-0.24982165	9.09628870	-2.27244985		6.00000000	5.72333333	52.06109233	0.147407
7	-0.23997124	9.08800600	-2.18086007		7.00000000	4.90571429	44.58316086	0.168960
8	-0.22982164	9.09908100	-2.09116572		8.00000000	4.29250000	39.05780519	0.190366
9	-0.21999802	9.08873180	-1.99950300		9.00000000	3.81555556	34.67856111	0.211735
10	-0.20985660	9.09570120	-1.90879293		10.00000000	3.43400000	31.23463792	0.233106
11	-0.20002778	9.09536740	-1.81932615		11.00000000	3.12181818	28.39408332	0.254576
12	-0.18990125	9.09905430	-1.72792179		12.00000000	2.86166667	26.03846039	0.275947
13	-0.18008955	9.08659080	-1.63640005		13.00000000	2.64153846	24.00257908	0.297280
14	-0.16997269	9.10311410	-1.54728079		14.00000000	2.45285714	22.32863844	0.318662
15	-0.16013271	9.08269410	-1.45443642		15.00000000	2.28933333	20.79331436	0.340137
16	-0.15001510	9.09512710	-1.36440640		16.00000000	2.14625000	19.52041654	0.361515
17	-0.13984393	9.08797260	-1.27089780		17.00000000	2.02000000	18.35770465	0.382870
18	-0.13000840	9.10061450	-1.18315633		18.00000000	1.90777778	17.36195011	0.404251
19	-0.11987517	9.08753400	-1.08936968		19.00000000	1.80736842	16.42452198	0.425729
20	-0.11005305	9.10523030	-1.00205837		20.00000000	1.71700000	15.63368043	0.447111
21	-0.09989526	9.08219340	-0.90726808		21.00000000	1.63523810	14.85154864	0.468459
22	-0.09009695	9.08992670	-0.81897468		22.00000000	1.56090909	14.18854922	0.489827
23	-0.07993916	9.10271740	-0.72766356		23.00000000	1.49304348	13.59075285	0.511314
24	-0.07014160	9.09578610	-0.63799298		24.00000000	1.43083333	13.01455394	0.532708
25	-0.05996520	9.09908770	-0.54562862		25.00000000	1.37360000	12.49850686	0.554063
26	-0.04984016	9.08856200	-0.45297538		26.00000000	1.32076923	12.00389304	0.575440
27	-0.04000836	9.09188940	-0.36375158		27.00000000	1.27185185	11.56353637	0.596917
28	-0.02986471	9.09325120	-0.27156731		28.00000000	1.22642857	11.15222308	0.618307
29	-0.02008129	9.09419060	-0.18262307		29.00000000	1.18413793	10.76877604	0.639664
30	-0.00990191	9.09315780	-0.09003967		30.00000000	1.14466667	10.40863463	0.661035
31	-0.00066255	9.09147930	-0.00602359		31.00000000	1.10774194	10.07101288	0.682623
32	0.00949205	9.08420940	0.08622779		32.00000000	1.07312500	9.74849221	0.704009
33	0.01931836	9.09364700	0.17567436		33.00000000	1.04060606	9.46290418	0.725381
34	0.02944460	9.09580990	0.26782251		34.00000000	1.01000000	9.18676800	0.746726
35	0.03926719	9.09164910	0.35700351		35.00000000	0.98114286	8.92020657	0.768201
36	0.04942246	9.09537890	0.44951598		36.00000000	0.95388889	8.67598087	0.789587
37	0.05922942	9.08092690	0.53785802		37.00000000	0.92810811	8.42808189	0.810974
38	0.06936087	9.09111020	0.63056729		38.00000000	0.90368421	8.21549274	0.832376
39	0.07952879	9.09222980	0.72309400		39.00000000	0.88051282	8.00582491	0.853834
40	0.08938487	9.08449840	0.81201670		40.00000000	0.85850000	7.79904188	0.875209
41	0.09955428	9.10365870	0.90630817		41.00000000	0.83756098	7.62486926	0.896567
42	0.10934710	9.09404090	0.99440700		42.00000000	0.81761905	7.43546106	0.917950
43	0.11947110	9.09588150	1.08669497		43.00000000	0.79860465	7.26401327	0.939439
44	0.12932272	9.08574770	1.17499361		44.00000000	0.78045455	7.09101309	0.960810
45	0.13947500	9.09840680	1.26900029		45.00000000	0.76311111	6.94309532	0.982180
46	0.14929387	9.08128550	1.35578026		46.00000000	0.74652174	6.77937705	1.003538
47	0.15941937	9.09298800	1.44959842		47.00000000	0.73063830	6.64368527	1.025025
48	0.16956794	9.08974650	1.54132959		48.00000000	0.71541667	6.50295614	1.046407
49	0.17942180	9.09298800	1.63148027		49.00000000	0.70081633	6.37251445	1.067786
50	0.18954134	9.09762190	1.72437545		50.00000000	0.68680000	6.24824672	1.089131
51	0.19934756	9.08962820	1.81199520		51.00000000	0.67333333	6.12034965	1.110596
52	0.20946710	9.09810450	1.90575357		52.00000000	0.66038462	6.00824824	1.131964
53	0.21931201	9.08878040	1.99327870		53.00000000	0.64792453	5.88884375	1.153352
54	0.22942188	9.10911560	2.08983043		54.00000000	0.63592593	5.79272277	1.174849
55	0.23926233	9.08960820	2.17480084		55.00000000	0.62436364	5.67522083	1.196235
56	0.24940941	9.08342840	2.26549252		56.00000000	0.61321429	5.57008806	1.217600
57	0.25954384	9.09443950	2.36040575		57.00000000	0.60245614	5.47900092	1.238980
58	0.26938131	9.10237030	2.45200844		58.00000000	0.59206897	5.38923097	1.260465
59	0.27952838	9.08407780	2.53925755		59.00000000	0.58203390	5.28724121	1.281850
60	0.28931972	9.09721850	2.63200471		60.00000000	0.57233333	5.20664139	1.303187
61	0.29945788	9.08572100	2.72079075		61.00000000	0.56295082	5.11481408	1.324561
62	0.30931395	9.09189800	2.81225088		62.00000000	0.55387097	5.03573834	1.346038
63	0.31943348	9.09333130	2.90471446		63.00000000	0.54507937	4.95658725	1.367415
64	0.32927692	9.09763720	2.99564196		64.00000000	0.53656250	4.88145096	1.388759
65	0.33941880	9.08971020	3.08521853		65.00000000	0.52830769	4.80216382	1.410153
66	0.34923318	9.08273890	3.17199379		66.00000000	0.52030303	4.72577657	1.431639
67	0.35938326	9.10694310	3.27288290		67.00000000	0.51253731	4.66764815	1.453008
68	0.36951247	9.08363530	3.35651652		68.00000000	0.50500000	4.58723583	1.474367
69	0.37934846	9.09353540	3.44961865		69.00000000	0.49768116	4.52568124	1.495742
70	0.38949034	9.09116840	3.54092227		70.00000000	0.49057143	4.45986747	1.517212
71	0.39932260	9.07092000	3.62222336		71.00000000	0.48366197	4.38725905	1.538596
72	0.40948606	9.08415130	3.71983332		72.00000000	0.47694444	4.33263550	1.559938
73	0.41931012	9.07895370	3.80689717		73.00000000	0.47041096	4.27083932	1.581307
74	0.42947432	9.05998710	3.89103180		74.00000000	0.46405405	4.20432374	1.602788
75	0.43927309	9.07444950	3.98616147		75.00000000	0.45786667	4.15488794	1.624162
76	0.44945887	9.06593320	4.07476409		76.00000000	0.45184211	4.09637034	1.645541
77	0.45954940	9.05729390	4.16227398		77.00000000	0.44597403	4.03931783	1.666916
78	0.46943375	9.06289290	4.25442780		78.00000000	0.44025641	3.98999669	1.688397
79	0.47954661	9.04474350	4.33737608		79.00000000	0.43468354	3.93160116	1.709780
80	0.48940417	9.04280950	4.42558868		80.00000000	0.42925000	3.88162598	1.731160
81	0.49953860	9.02146630	4.50657065		81.00000000	0.42395062	3.82465621	1.752499
82	0.50936121	9.00045490	4.58448260		82.00000000	0.41878049	3.76921489	1.773963
83	0.51948744	8.96387960	4.65662287		83.00000000	0.41373494	3.70867019	1.795344
84	0.52928245	8.94178870	4.73273183		84.00000000	0.40880952	3.65548838	1.816724
85	0.53939980	8.88277530	4.79136722		85.00000000	0.40400000	3.58864122	1.838204
86	0.54955727	8.79619980	4.83401555		86.00000000	0.39930233	3.51234304	1.859586
87	0.55936199	8.71673110	4.87580805		87.00000000	0.39471264	3.44060398	1.880937
88	0.56950688	8.54881000	4.86860611		88.00000000	0.39022727	3.33597881	1.902311
89	0.57931978	8.36682990	4.84707006		89.00000000	0.38584270	3.22828021	1.923794
90	0.58940953	8.09127240	4.76907306		90.00000000	0.38155556	3.08726994	1.945172
91	0.59921128	7.75088020	4.64441485		91.00000000	0.37736264	2.92489259	1.966524
92	0.60935169	7.25466870	4.42064463		92.00000000	0.37326087	2.70788395	1.987984
93	0.61912888	6.63898180	4.11038537		93.00000000	0.36924731	2.45142618	2.009491
94	0.62924320	5.81776670	3.66079014		94.00000000	0.36531915	2.12534158	2.030875
95	0.63936645	4.71000530	3.01141937		95.00000000	0.36147368	1.70254297	2.052218
96	0.64913249	3.42550180	2.22360451		96.00000000	0.35770833	1.22533054	2.073605
97	0.65922821	1.73530860	1.14396438		97.00000000	0.35402062	0.61433502	2.095078
98	0.66897267	-0.22669159	-0.15165048		98.00000000	0.35040816	-0.07943458	2.116462
99	0.67908847	-2.64955970	-1.79928544		99.00000000	0.34686869	-0.91904929	2.137803
100	0.68879199	-5.42528150	-3.73689044		100.00000000	0.34340000	-1.86304167	2.159227
101	0.69906855	-8.79627700	-6.14920061		101.00000000	0.34000000	-2.99073418	2.180713
04:26 04/04/2018
Test Lot:	JK-PERC
Recipe:	Recipe_YJX-LID
Cell Name:	3-12-6h
Test Order:	3
Test Condition:	Light
1	-0.29984653	9.09483810	-2.72705565		1.00000000	34.34000000	312.31674035	0.000000
2	-0.29009208	9.10157200	-2.64029395		2.00000000	17.17000000	156.27399124	0.061783
3	-0.27989781	9.08667560	-2.54334060		3.00000000	11.44666667	104.01214670	0.083250
4	-0.27008680	9.10369110	-2.45878680		4.00000000	8.58500000	78.15518809	0.104752
5	-0.25992304	9.08989430	-2.36267296		5.00000000	6.86800000	62.42939405	0.126143
6	-0.24978307	9.08670710	-2.26970560		6.00000000	5.72333333	52.00625364	0.147524
7	-0.23995495	9.10069750	-2.18375741		7.00000000	4.90571429	44.64542174	0.168862
8	-0.22984104	9.08667560	-2.08849097		8.00000000	4.29250000	39.00455501	0.190342
9	-0.21995637	9.09368320	-2.00021355		9.00000000	3.81555556	34.69745345	0.211721
10	-0.20983128	9.10089400	-1.90965224		10.00000000	3.43400000	31.25247000	0.233098
11	-0.20000243	9.09365270	-1.81875264		11.00000000	3.12181818	28.38873034	0.254573
12	-0.18987662	9.09267140	-1.72648571		12.00000000	2.86166667	26.02019466	0.276018
13	-0.18010432	9.09564880	-1.63816564		13.00000000	2.64153846	24.02650614	0.297380
14	-0.16993906	9.08881470	-1.54454463		14.00000000	2.45285714	22.29356406	0.318763
15	-0.16014369	9.09954930	-1.45723540		15.00000000	2.28933333	20.83190153	0.340110
16	-0.14999926	9.08689590	-1.36302766		16.00000000	2.14625000	19.50275033	0.361605
17	-0.13983771	9.09639170	-1.27201858		17.00000000	2.02000000	18.37471123	0.382982
18	-0.13003416	9.08593750	-1.18148225		18.00000000	1.90777778	17.33394965	0.404346
19	-0.11990611	9.09749600	-1.09084536		19.00000000	1.80736842	16.44252698	0.425753
20	-0.11007874	9.09364130	-1.00101658		20.00000000	1.71700000	15.61378211	0.447228
21	-0.09990231	9.08594130	-0.90770652		21.00000000	1.63523810	14.85767734	0.468609
22	-0.09007047	9.08689400	-0.81846082		22.00000000	1.56090909	14.18381545	0.489993
23	-0.07997964	9.10184190	-0.72796200		23.00000000	1.49304348	13.58944569	0.511352
24	-0.07014334	9.09886840	-0.63822497		24.00000000	1.43083333	13.01896420	0.532825
25	-0.05999221	9.08866120	-0.54524886		25.00000000	1.37360000	12.48418502	0.554210
26	-0.04982248	9.08493330	-0.45263387		26.00000000	1.32076923	11.99910037	0.575609
27	-0.04001074	9.10015680	-0.36410400		27.00000000	1.27185185	11.57405128	0.597094
28	-0.02983803	9.09045220	-0.27124116		28.00000000	1.22642857	11.14879031	0.618476
29	-0.02004639	9.09467600	-0.18231538		29.00000000	1.18413793	10.76935082	0.639826
30	-0.00990717	9.09459400	-0.09010166		30.00000000	1.14466667	10.41027860	0.661198
31	-0.00065066	9.09158710	-0.00591549		31.00000000	1.10774194	10.07113229	0.682799
32	0.00949133	9.08630180	0.08624111		32.00000000	1.07312500	9.75073762	0.704174
33	0.01931842	9.09215930	0.17564615		33.00000000	1.04060606	9.46135607	0.725523
34	0.02946926	9.09895800	0.26813953		34.00000000	1.01000000	9.18994758	0.746908
35	0.03928965	9.08481980	0.35693935		35.00000000	0.98114286	8.91350606	0.768384
36	0.04947547	9.09225270	0.44984343		36.00000000	0.95388889	8.67299883	0.789764
37	0.05927353	9.09416390	0.53904316		37.00000000	0.92810811	8.44036725	0.811103
38	0.06943553	9.08571050	0.63087111		38.00000000	0.90368421	8.21061312	0.832485
39	0.07957371	9.09233470	0.72351083		39.00000000	0.88051282	8.00591727	0.853955
40	0.08941270	9.09774020	0.81345355		40.00000000	0.85850000	7.81040996	0.875333
41	0.09950847	9.08990480	0.90452254		41.00000000	0.83756098	7.61334953	0.896670
42	0.10934523	9.08774660	0.99370174		42.00000000	0.81761905	7.43031472	0.918048
43	0.11952882	9.09646320	1.08728951		43.00000000	0.79860465	7.26447782	0.939532
44	0.12930232	9.09185220	1.17559758		44.00000000	0.78045455	7.09577738	0.960910
45	0.13948442	9.08764650	1.26758510		45.00000000	0.76311111	6.93488402	0.982268
46	0.14928025	9.08298680	1.35591054		46.00000000	0.74652174	6.78064710	1.003646
47	0.15945341	9.09553910	1.45031473		47.00000000	0.73063830	6.64554921	1.025124
48	0.16958341	9.08607770	1.54084804		48.00000000	0.71541667	6.50033142	1.046504
49	0.17941272	9.08949380	1.63077081		49.00000000	0.70081633	6.37006565	1.067858
50	0.18952858	9.09070870	1.72294911		50.00000000	0.68680000	6.24349874	1.089229
51	0.19933632	9.09111790	1.81218999		51.00000000	0.67333333	6.12135272	1.110709
52	0.20947301	9.09358980	1.90486163		52.00000000	0.66038462	6.00526680	1.132088
53	0.21929415	9.08889200	1.99314085		53.00000000	0.64792453	5.88891606	1.153481
54	0.22942489	9.09117980	2.08574293		54.00000000	0.63592593	5.78131693	1.174835
55	0.23927729	9.08519840	2.17388165		55.00000000	0.62436364	5.67246751	1.196312
56	0.24941324	9.08889870	2.26689167		56.00000000	0.61321429	5.57344252	1.217711
57	0.25955364	9.10206410	2.36247387		57.00000000	0.60245614	5.48359441	1.239105
58	0.26939934	9.08341410	2.44706576		58.00000000	0.59206897	5.37800759	1.260580
59	0.27951968	9.10131650	2.54399708		59.00000000	0.58203390	5.29727472	1.281964
60	0.28937057	9.07765200	2.62680533		60.00000000	0.57233333	5.19544283	1.303310
61	0.29950282	9.09998130	2.72547006		61.00000000	0.56295082	5.12284193	1.324704
62	0.30930310	9.08057880	2.80865117		62.00000000	0.55387097	5.02946897	1.346185
63	0.31944725	9.09291170	2.90470564		63.00000000	0.54507937	4.95635854	1.367618
64	0.32926688	9.07748320	2.98891457		64.00000000	0.53656250	4.87063708	1.388983
65	0.33944228	9.08901690	3.08519662		65.00000000	0.52830769	4.80179754	1.410356
66	0.34928277	9.07359120	3.16924907		66.00000000	0.52030303	4.72101700	1.431836
67	0.35941947	9.09937570	3.27049279		67.00000000	0.51253731	4.66376958	1.453237
68	0.36956659	9.07596780	3.35417447		68.00000000	0.50500000	4.58336374	1.474597
69	0.37935346	9.08502480	3.44643559		69.00000000	0.49768116	4.52144568	1.495974
70	0.38951623	9.07902530	3.53642771		70.00000000	0.49057143	4.45391041	1.517463
71	0.39937904	9.09190370	3.63111577		71.00000000	0.48366197	4.39740807	1.538833
72	0.40949488	9.07555200	3.71639208		72.00000000	0.47694444	4.32853411	1.560171
73	0.41931975	9.06768320	3.80225865		73.00000000	0.47041096	4.26553755	1.581563
74	0.42944676	9.06807230	3.89425427		74.00000000	0.46405405	4.20807571	1.603039
75	0.43928948	9.07424740	3.98622142		75.00000000	0.45786667	4.15479541	1.624414
76	0.44946042	9.06264500	4.07330023		76.00000000	0.45184211	4.09488460	1.645769
77	0.45958742	9.06832600	4.16768855		77.00000000	0.44597403	4.04423786	1.667139
78	0.46943536	9.05739500	4.25186148		78.00000000	0.44025641	3.98757621	1.688621
79	0.47956461	9.03200440	4.33142967		79.00000000	0.43468354	3.92606368	1.710011
80	0.48939839	9.02691080	4.41775561		80.00000000	0.42925000	3.87480146	1.731385
81	0.49952319	9.00572490	4.49856843		81.00000000	0.42395062	3.81798263	1.752751
82	0.50935400	9.00771710	4.58811674		82.00000000	0.41878049	3.77225616	1.774238
83	0.51950258	8.96353530	4.65657971		83.00000000	0.41373494	3.70852774	1.795619
84	0.52927166	8.91498570	4.71844928		84.00000000	0.40880952	3.64453106	1.817007
85	0.53939867	8.89505580	4.79798127		85.00000000	0.40400000	3.59360254	1.838378
86	0.54956734	8.79180720	4.83169010		86.00000000	0.39930233	3.51058906	1.859860
87	0.55937809	8.69741730	4.86514468		87.00000000	0.39471264	3.43298058	1.881241
88	0.56949764	8.54705430	4.86752725		88.00000000	0.39022727	3.33529369	1.902617
89	0.57929647	8.36740400	4.84720760		89.00000000	0.38584270	3.22850172	1.924100
90	0.58942574	8.09874730	4.77361012		90.00000000	0.38155556	3.09012203	1.945486
91	0.59922749	7.74597500	4.64160116		91.00000000	0.37736264	2.92304155	1.966835
92	0.60935229	7.26299950	4.42572538		92.00000000	0.37326087	2.71099351	1.988291
93	0.61913472	6.64181520	4.11217839		93.00000000	0.36924731	2.45247241	2.009794
94	0.62927735	5.80574040	3.65342093		94.00000000	0.36531915	2.12094814	2.031180
95	0.63936198	4.73699240	3.02865284		95.00000000	0.36147368	1.71229809	2.052544
96	0.64918536	3.41033770	2.21394131		96.00000000	0.35770833	1.21990621	2.073974
97	0.65926397	1.74834640	1.15262179		97.00000000	0.35402062	0.61895067	2.095475
98	0.66898316	-0.23332754	-0.15609220		98.00000000	0.35040816	-0.08175987	2.116862
99	0.67909306	-2.65913340	-1.80579904		99.00000000	0.34686869	-0.92237011	2.138212
100	0.68882561	-5.44321440	-3.74942548		100.00000000	0.34340000	-1.86919982	2.159586
101	0.69911045	-8.82001880	-6.16616731		101.00000000	0.34000000	-2.99880639	2.181067
04:27 04/04/2018
Test Lot:	JK-PERC
Recipe:	Recipe_YJX-LID
Cell Name:	3-12-6h
Test Order:	4
Test Condition:	Light
1	-0.29988134	9.10715100	-2.73106465		1.00000000	34.34000000	312.73956534	0.000000
2	-0.29008660	9.08972450	-2.63680728		2.00000000	17.17000000	156.07056967	0.061789
3	-0.27996960	9.09416200	-2.54608890		3.00000000	11.44666667	104.09784103	0.083218
4	-0.27011308	9.10200600	-2.45857087		4.00000000	8.58500000	78.14072151	0.104714
5	-0.25997522	9.08796880	-2.36264669		5.00000000	6.86800000	62.41616972	0.126097
6	-0.24982250	9.09432410	-2.27196678		6.00000000	5.72333333	52.04984827	0.147443
7	-0.24001214	9.09591770	-2.18313067		7.00000000	4.90571429	44.62197340	0.168829
8	-0.22986163	9.09992310	-2.09172316		8.00000000	4.29250000	39.06141991	0.190308
9	-0.22004755	9.09414200	-2.00114367		9.00000000	3.81555556	34.69920403	0.211748
10	-0.20988961	9.09468460	-1.90887980		10.00000000	3.43400000	31.23114692	0.233132
11	-0.20004722	9.09469990	-1.81936943		11.00000000	3.12181818	28.39199951	0.254508
12	-0.18993692	9.10129830	-1.72867257		12.00000000	2.86166667	26.04488197	0.276037
13	-0.18014665	9.08477020	-1.63659092		13.00000000	2.64153846	23.99776990	0.297415
14	-0.17000583	9.08650210	-1.54475833		14.00000000	2.45285714	22.28789158	0.318766
15	-0.16021183	9.10008810	-1.45794177		15.00000000	2.28933333	20.83313502	0.340145
16	-0.15004422	9.08638190	-1.36335908		16.00000000	2.14625000	19.50164715	0.361627
17	-0.13988106	9.08788390	-1.27122283		17.00000000	2.02000000	18.35752548	0.382999
18	-0.13006698	9.08867840	-1.18213695		18.00000000	1.90777778	17.33917868	0.404364
19	-0.11992094	9.09062100	-1.09015582		19.00000000	1.80736842	16.43010132	0.425737
20	-0.11008155	9.08623030	-1.00022632		20.00000000	1.71700000	15.60105743	0.447206
21	-0.09993254	9.09681420	-0.90906771		21.00000000	1.63523810	14.87545713	0.468598
22	-0.09012068	9.09096810	-0.81928424		22.00000000	1.56090909	14.19017475	0.489981
23	-0.07998879	9.07844350	-0.72617367		23.00000000	1.49304348	13.55451086	0.511323
24	-0.07015535	9.10360340	-0.63866650		24.00000000	1.43083333	13.02573920	0.532798
25	-0.05997136	9.08998200	-0.54513854		25.00000000	1.37360000	12.48599928	0.554177
26	-0.04980225	9.09067440	-0.45273601		26.00000000	1.32076923	12.00668303	0.575552
27	-0.03999486	9.08937740	-0.36352836		27.00000000	1.27185185	11.56034148	0.596977
28	-0.02984734	9.08842660	-0.27126531		28.00000000	1.22642857	11.14630605	0.618432
29	-0.02001464	9.09756180	-0.18208444		29.00000000	1.18413793	10.77276801	0.639815
30	-0.00989614	9.08570580	-0.08991346		30.00000000	1.14466667	10.40010457	0.661165
31	-0.00068939	9.09466930	-0.00626978		31.00000000	1.10774194	10.07454657	0.682638
32	0.00950035	9.08819100	0.08634099		32.00000000	1.07312500	9.75276497	0.704126
33	0.01927694	9.07734010	0.17498337		33.00000000	1.04060606	9.44593512	0.725504
34	0.02944651	9.10210800	0.26802527		34.00000000	1.01000000	9.19312908	0.746866
35	0.03926776	9.08625510	0.35679685		35.00000000	0.98114286	8.91491429	0.768236
36	0.04939862	9.08684250	0.44887744		36.00000000	0.95388889	8.66783810	0.789718
37	0.05926006	9.07993700	0.53807757		37.00000000	0.92810811	8.42716315	0.811095
38	0.06936785	9.11002830	0.63194306		38.00000000	0.90368421	8.23258873	0.832494
39	0.07950838	9.08652690	0.72245502		39.00000000	0.88051282	8.00080343	0.853848
40	0.08932814	9.09105010	0.81208660		40.00000000	0.85850000	7.80466651	0.875305
41	0.09947612	9.09097960	0.90433539		41.00000000	0.83756098	7.61424974	0.896687
42	0.10927951	9.08667760	0.99298768		42.00000000	0.81761905	7.42944069	0.918068
43	0.11945800	9.09152510	1.08605541		43.00000000	0.79860465	7.26053423	0.939535
44	0.12930530	9.10083100	1.17678568		44.00000000	0.78045455	7.10278492	0.960929
45	0.13942054	9.09087470	1.26745466		45.00000000	0.76311111	6.93734749	0.982267
46	0.14923583	9.09015850	1.35657735		46.00000000	0.74652174	6.78600093	1.003657
47	0.15939496	9.09082980	1.44903245		47.00000000	0.73063830	6.64210841	1.025133
48	0.16954519	9.08179090	1.53977396		48.00000000	0.71541667	6.49726457	1.046501
49	0.17933741	9.09270860	1.63066281		49.00000000	0.70081633	6.37231864	1.067855
50	0.18951441	9.09324740	1.72330142		50.00000000	0.68680000	6.24524231	1.089232
51	0.19925156	9.08748530	1.81069562		51.00000000	0.67333333	6.11890677	1.110711
52	0.20944941	9.09754850	1.90547617		52.00000000	0.66038462	6.00788107	1.132093
53	0.21922971	9.09267710	1.99338496		53.00000000	0.64792453	5.89136852	1.153438
54	0.22936654	9.09518530	2.08613118		54.00000000	0.63592593	5.78386413	1.174812
55	0.23921829	9.09590820	2.17590761		55.00000000	0.62436364	5.67915432	1.196293
56	0.24940275	9.09241010	2.26767208		56.00000000	0.61321429	5.57559576	1.217688
57	0.25953734	9.08032700	2.35668392		57.00000000	0.60245614	5.47049876	1.239046
58	0.26936901	9.08829780	2.44810578		58.00000000	0.59206897	5.38089908	1.260415
59	0.27951622	9.08377840	2.53906340		59.00000000	0.58203390	5.28706695	1.281890
60	0.28934643	9.10003660	2.63306310		60.00000000	0.57233333	5.20825428	1.303273
61	0.29947504	9.08244040	2.71996420		61.00000000	0.56295082	5.11296727	1.324621
62	0.30930373	9.09768390	2.81394756		62.00000000	0.55387097	5.03894299	1.346000
63	0.31944352	9.08189960	2.90115398		63.00000000	0.54507937	4.95035607	1.367475
64	0.32927221	9.09029870	2.99318274		64.00000000	0.53656250	4.87751340	1.388859
65	0.33941871	9.07996370	3.08190957		65.00000000	0.52830769	4.79701467	1.410223
66	0.34923699	9.08973310	3.17447103		66.00000000	0.52030303	4.72941568	1.431588
67	0.35937899	9.07547280	3.26153425		67.00000000	0.51253731	4.65151845	1.453072
68	0.36951730	9.07606700	3.35376377		68.00000000	0.50500000	4.58341384	1.474443
69	0.37935269	9.08232690	3.44540514		69.00000000	0.49768116	4.52010298	1.495834
70	0.38948506	9.08835120	3.53977701		70.00000000	0.49057143	4.45848543	1.517179
71	0.39934725	9.07430460	3.62379859		71.00000000	0.48366197	4.38889606	1.538647
72	0.40945876	9.08225150	3.71880744		72.00000000	0.47694444	4.33172940	1.560023
73	0.41928819	9.07485200	3.80497827		73.00000000	0.47041096	4.26890983	1.581398
74	0.42943466	9.06930260	3.89467288		74.00000000	0.46405405	4.20864664	1.602893
75	0.43922392	9.06366060	3.98097654		75.00000000	0.45786667	4.14994807	1.624268
76	0.44938976	9.05852700	4.07080927		76.00000000	0.45184211	4.09302391	1.645602
77	0.45954445	9.06325820	4.16497000		77.00000000	0.44597403	4.04197775	1.666980
78	0.46938726	9.04820160	4.24711056		78.00000000	0.44025641	3.98352876	1.688458
79	0.47954640	9.03233240	4.33142249		79.00000000	0.43468354	3.92620626	1.709849
80	0.48935276	9.03403470	4.42082981		80.00000000	0.42925000	3.87785939	1.731206
81	0.49951044	9.01119420	4.50118558		81.00000000	0.42395062	3.82030134	1.752579
82	0.50933093	9.00189210	4.58494208		82.00000000	0.41878049	3.76981676	1.774054
83	0.51945657	8.95975880	4.65420557		83.00000000	0.41373494	3.70696527	1.795435
84	0.52923989	8.93973730	4.73126559		84.00000000	0.40880952	3.65464975	1.816789
85	0.53939009	8.86102290	4.77954794		85.00000000	0.40400000	3.57985325	1.838166
86	0.54949641	8.80537130	4.83851992		86.00000000	0.39930233	3.51600524	1.859634
87	0.55932432	8.70023160	4.86625112		87.00000000	0.39471264	3.43409142	1.881004
88	0.56946784	8.54642680	4.86691521		88.00000000	0.39022727	3.33504882	1.902352
89	0.57927942	8.36987110	4.84849408		89.00000000	0.38584270	3.22945364	1.923723
90	0.58940285	8.09818270	4.77309196		90.00000000	0.38155556	3.08990660	1.945193
91	0.59924197	7.75497290	4.64710524		91.00000000	0.37736264	2.92643703	1.966585
92	0.60932595	7.26378390	4.42601203		92.00000000	0.37326087	2.71128629	1.988043
93	0.61915684	6.64343790	4.11333002		93.00000000	0.36924731	2.45307159	2.009452
94	0.62927431	5.80742170	3.65446128		94.00000000	0.36531915	2.12156235	2.030936
95	0.63937688	4.73004580	3.02428193		95.00000000	0.36147368	1.70978708	2.052314
96	0.64914829	3.42053870	2.22043685		96.00000000	0.35770833	1.22355520	2.073679
97	0.65922630	1.74448930	1.15001323		97.00000000	0.35402062	0.61758518	2.095051
98	0.66896570	-0.24810857	-0.16597612		98.00000000	0.35040816	-0.08693927	2.116526
99	0.67905039	-2.67458770	-1.81617982		99.00000000	0.34686869	-0.92773072	2.137902
100	0.68875110	-5.46227030	-3.76214468		100.00000000	0.34340000	-1.87574362	2.159279
101	0.69906354	-8.84765430	-6.18507254		101.00000000	0.34000000	-3.00820246	2.180615
