# Supplementary material for: Study on the Electrical Injection Regeneration of Industrialized B-Doped Czochralski Silicon PERC Solar Cells
Source: Hindawi journal article supplement (doi:10.1155/2019/5357370), 2019-06-20
Supplement: f1 [file 5357370.f1.zip › section3.3/IVRawData_3-12-7h.csv]

05:28 04/04/2018
Test Lot:	JK-PERC
Recipe:	Recipe_YJX-LID
Cell Name:	3-12-7h
Test Order:	2
Test Condition:	Light
1	-0.29991218	9.09619140	-2.72805859		1.00000000	34.34000000	312.36321268	0.000000
2	-0.29012808	9.09584900	-2.63896121		2.00000000	17.17000000	156.17572733	0.061802
3	-0.27995697	9.08913900	-2.54456781		3.00000000	11.44666667	104.04034442	0.083230
4	-0.27016243	9.09411720	-2.45688880		4.00000000	8.58500000	78.07299616	0.104727
5	-0.25996748	9.09182550	-2.36357896		5.00000000	6.86800000	62.44265753	0.126113
6	-0.24981794	9.09272670	-2.27152625		6.00000000	5.72333333	52.04070581	0.147467
7	-0.24002267	9.10335450	-2.18501145		7.00000000	4.90571429	44.65845622	0.168849
8	-0.22985676	9.08537200	-2.08833417		8.00000000	4.29250000	38.99895931	0.190387
9	-0.22002649	9.09653660	-2.00147902		9.00000000	3.81555556	34.70834076	0.211776
10	-0.20987174	9.08742620	-1.90719395		10.00000000	3.43400000	31.20622157	0.233125
11	-0.20003405	9.09672550	-1.81965484		11.00000000	3.12181818	28.39832306	0.254508
12	-0.18995669	9.08726600	-1.72618697		12.00000000	2.86166667	26.00472620	0.276009
13	-0.18009295	9.09853940	-1.63858280		13.00000000	2.64153846	24.03414177	0.297378
14	-0.17000742	9.09881310	-1.54686574		14.00000000	2.45285714	22.31808870	0.318743
15	-0.16017567	9.07559200	-1.45368903		15.00000000	2.28933333	20.77705529	0.340114
16	-0.15003878	9.10440250	-1.36601344		16.00000000	2.14625000	19.54032387	0.361593
17	-0.13987435	9.09637830	-1.27235000		17.00000000	2.02000000	18.37468417	0.382972
18	-0.13006642	9.09340570	-1.18274673		18.00000000	1.90777778	17.34819732	0.404328
19	-0.11997047	9.08871840	-1.09037782		19.00000000	1.80736842	16.42666262	0.425713
20	-0.11012756	9.07732300	-0.99966343		20.00000000	1.71700000	15.58576359	0.447195
21	-0.09995198	9.10019210	-0.90958217		21.00000000	1.63523810	14.88098080	0.468603
22	-0.09019838	9.09375950	-0.82024233		22.00000000	1.56090909	14.19453187	0.489968
23	-0.08001162	9.10533330	-0.72853248		23.00000000	1.49304348	13.59465850	0.511363
24	-0.07016276	9.09127140	-0.63786868		24.00000000	1.43083333	13.00809416	0.532847
25	-0.06003555	9.09057040	-0.54575735		25.00000000	1.37360000	12.48680750	0.554223
26	-0.04986367	9.09349920	-0.45343528		26.00000000	1.32076923	12.01041394	0.575613
27	-0.04006616	9.08906560	-0.36416399		27.00000000	1.27185185	11.55994491	0.596959
28	-0.02991067	9.09803870	-0.27212842		28.00000000	1.22642857	11.15809461	0.618436
29	-0.02007967	9.09825610	-0.18268998		29.00000000	1.18413793	10.77359015	0.639814
30	-0.00994427	9.09508130	-0.09044392		30.00000000	1.14466667	10.41083639	0.661203
31	-0.00064467	9.09830090	-0.00586544		31.00000000	1.10774194	10.07856945	0.682736
32	0.00949722	9.08806420	0.08631133		32.00000000	1.07312500	9.75262889	0.704202
33	0.01927733	9.10932250	0.17560341		33.00000000	1.04060606	9.47921620	0.725579
34	0.02946231	9.08734130	0.26773403		34.00000000	1.01000000	9.17821471	0.746967
35	0.03923423	9.09467120	0.35682240		35.00000000	0.98114286	8.92317169	0.768328
36	0.04941995	9.09621810	0.44953465		36.00000000	0.95388889	8.67678138	0.789820
37	0.05925588	9.09918210	0.53918003		37.00000000	0.92810811	8.44502468	0.811199
38	0.06942300	9.08663560	0.63082149		38.00000000	0.90368421	8.21144912	0.832554
39	0.07953578	9.08180240	0.72232826		39.00000000	0.88051282	7.99664345	0.853913
40	0.08932631	9.09659190	0.81256496		40.00000000	0.85850000	7.80942415	0.875397
41	0.09953287	9.09174250	0.90492724		41.00000000	0.83756098	7.61488872	0.896776
42	0.10931075	9.08386990	0.99296463		42.00000000	0.81761905	7.42714506	0.918155
43	0.11949052	9.09321590	1.08655310		43.00000000	0.79860465	7.26188451	0.939501
44	0.12930411	9.09473610	1.17598676		44.00000000	0.78045455	7.09802813	0.960981
45	0.13943104	9.09621140	1.26829422		45.00000000	0.76311111	6.94141999	0.982366
46	0.14928484	9.08918860	1.35687807		46.00000000	0.74652174	6.78527688	1.003749
47	0.15942441	9.08829400	1.44889591		47.00000000	0.73063830	6.64025566	1.025235
48	0.16956846	9.09456920	1.54215209		48.00000000	0.71541667	6.50640638	1.046616
49	0.17938578	9.08753490	1.63017454		49.00000000	0.70081633	6.36869283	1.067953
50	0.18950005	9.08374310	1.72136977		50.00000000	0.68680000	6.23871476	1.089335
51	0.19927123	9.09520530	1.81241275		51.00000000	0.67333333	6.12410490	1.110821
52	0.20941231	9.09727100	1.90508053		52.00000000	0.66038462	6.00769781	1.132190
53	0.21926311	9.09587290	1.99438938		53.00000000	0.64792453	5.89343916	1.153550
54	0.22939822	9.08413220	2.08388376		54.00000000	0.63592593	5.77683518	1.174931
55	0.23919769	9.08551030	2.17323308		55.00000000	0.62436364	5.67266225	1.196420
56	0.24937671	9.09622000	2.26838542		56.00000000	0.61321429	5.57793205	1.217805
57	0.25952148	9.08953290	2.35892903		57.00000000	0.60245614	5.47604491	1.239154
58	0.26930013	9.08864500	2.44757328		58.00000000	0.59206897	5.38110464	1.260519
59	0.27945757	9.08512500	2.53890696		59.00000000	0.58203390	5.28785072	1.282002
60	0.28932548	9.08073430	2.62728781		60.00000000	0.57233333	5.19720693	1.303370
61	0.29945540	9.09054370	2.72221240		61.00000000	0.56295082	5.11752903	1.324721
62	0.30924293	9.08172040	2.80845783		62.00000000	0.55387097	5.03010127	1.346090
63	0.31945026	9.08941750	2.90361678		63.00000000	0.54507937	4.95445392	1.367565
64	0.32925642	9.09166720	2.99348979		64.00000000	0.53656250	4.87824768	1.388961
65	0.33938259	9.08751300	3.08414370		65.00000000	0.52830769	4.80100302	1.410316
66	0.34924158	9.07975770	3.17102893		66.00000000	0.52030303	4.72422545	1.431696
67	0.35937893	9.08684730	3.26562146		67.00000000	0.51253731	4.65734830	1.453175
68	0.36955425	9.07947440	3.35535835		68.00000000	0.50500000	4.58513457	1.474562
69	0.37937081	9.09002300	3.44848939		69.00000000	0.49768116	4.52393319	1.495922
70	0.38952231	9.08223820	3.53773440		70.00000000	0.49057143	4.45548657	1.517302
71	0.39931804	9.08115960	3.62627085		71.00000000	0.48366197	4.39221156	1.538791
72	0.40952238	9.05585960	3.70857718		72.00000000	0.47694444	4.31914193	1.560170
73	0.41929951	9.09055710	3.81166614		73.00000000	0.47041096	4.27629768	1.581565
74	0.42947480	9.06321720	3.89242339		74.00000000	0.46405405	4.20582268	1.602906
75	0.43929213	9.07533550	3.98672346		75.00000000	0.45786667	4.15529361	1.624377
76	0.44943690	9.05769820	4.07086380		76.00000000	0.45184211	4.09264942	1.645766
77	0.45957351	9.05777840	4.16271501		77.00000000	0.44597403	4.03953390	1.667152
78	0.46941242	9.05835440	4.25210406		78.00000000	0.44025641	3.98799859	1.688637
79	0.47952595	9.04180720	4.33578119		79.00000000	0.43468354	3.93032480	1.710009
80	0.48938569	9.03339770	4.42081557		80.00000000	0.42925000	3.87758596	1.731348
81	0.49950743	9.00201130	4.49657153		81.00000000	0.42395062	3.81640825	1.752731
82	0.50932473	8.99413390	4.58093482		82.00000000	0.41878049	3.76656778	1.774212
83	0.51948667	8.96837140	4.65894939		83.00000000	0.41373494	3.71052860	1.795581
84	0.52925634	8.92748830	4.72492978		84.00000000	0.40880952	3.64964224	1.816939
85	0.53938401	8.87555120	4.78733040		85.00000000	0.40400000	3.58572268	1.838314
86	0.54952657	8.78952120	4.83007544		86.00000000	0.39930233	3.50967626	1.859792
87	0.55933046	8.69199470	4.86169739		87.00000000	0.39471264	3.43084021	1.881165
88	0.56945443	8.54937170	4.86847759		88.00000000	0.39022727	3.33619800	1.902512
89	0.57929480	8.35193160	4.83823055		89.00000000	0.38584270	3.22253181	1.923888
90	0.58940685	8.08487420	4.76528023		90.00000000	0.38155556	3.08482867	1.945367
91	0.59920561	7.72026300	4.62602490		91.00000000	0.37736264	2.91333881	1.966745
92	0.60933924	7.22808890	4.40435820		92.00000000	0.37326087	2.69796275	1.988208
93	0.61912751	6.60916710	4.09191717		93.00000000	0.36924731	2.44041719	2.009608
94	0.62923509	5.76667070	3.62859156		94.00000000	0.36531915	2.10667523	2.031102
95	0.63934714	4.68132590	2.99299233		95.00000000	0.36147368	1.69217612	2.052489
96	0.64911312	3.37596010	2.19137999		96.00000000	0.35770833	1.20760906	2.073844
97	0.65923184	1.70686700	1.12522107		97.00000000	0.35402062	0.60426611	2.095217
98	0.66895318	-0.25123262	-0.16806286		98.00000000	0.35040816	-0.08803396	2.116710
99	0.67905849	-2.64888310	-1.79874656		99.00000000	0.34686869	-0.91881460	2.138100
100	0.68875968	-5.38354440	-3.70796832		100.00000000	0.34340000	-1.84870915	2.159484
101	0.69905484	-8.68632320	-6.07221627		101.00000000	0.34000000	-2.95334989	2.180904
05:29 04/04/2018
Test Lot:	JK-PERC
Recipe:	Recipe_YJX-LID
Cell Name:	3-12-7h
Test Order:	3
Test Condition:	Light
1	-0.29986882	9.09748740	-2.72805281		1.00000000	34.34000000	312.40771732	0.000000
2	-0.29003546	9.07966900	-2.63342598		2.00000000	17.17000000	155.89791673	0.061805
3	-0.27991256	9.09329510	-2.54532751		3.00000000	11.44666667	104.08791791	0.083230
4	-0.27010450	9.09109590	-2.45554591		4.00000000	8.58500000	78.04705830	0.104611
5	-0.25991315	9.08741090	-2.36193759		5.00000000	6.86800000	62.41233806	0.126105
6	-0.24975899	9.09065720	-2.27047336		6.00000000	5.72333333	52.02886137	0.147480
7	-0.23997474	9.09791180	-2.18326902		7.00000000	4.90571429	44.63175589	0.168871
8	-0.22983101	9.08951380	-2.08905214		8.00000000	4.29250000	39.01673799	0.190294
9	-0.21996340	9.09160610	-1.99982059		9.00000000	3.81555556	34.68952816	0.211762
10	-0.20984125	9.09156800	-1.90778599		10.00000000	3.43400000	31.22044451	0.233135
11	-0.20005476	9.08608440	-1.81771443		11.00000000	3.12181818	28.36510348	0.254531
12	-0.18992220	9.09424500	-1.72719902		12.00000000	2.86166667	26.02469778	0.275897
13	-0.18011190	9.07973380	-1.63536811		13.00000000	2.64153846	23.98446605	0.297384
14	-0.16996668	9.10128590	-1.54691535		14.00000000	2.45285714	22.32415413	0.318771
15	-0.16012736	9.08919530	-1.45542885		15.00000000	2.28933333	20.80819777	0.340144
16	-0.15001786	9.08456230	-1.36284660		16.00000000	2.14625000	19.49774184	0.361516
17	-0.13982649	9.10344410	-1.27290264		17.00000000	2.02000000	18.38895708	0.382982
18	-0.13006607	9.09304810	-1.18269703		18.00000000	1.90777778	17.34751510	0.404351
19	-0.11985534	9.09456060	-1.09003165		19.00000000	1.80736842	16.43722163	0.425732
20	-0.11006366	9.09872910	-1.00143943		20.00000000	1.71700000	15.62251786	0.447073
21	-0.09990802	9.09440330	-0.90860380		21.00000000	1.63523810	14.87151473	0.468544
22	-0.09009399	9.10204030	-0.82003916		22.00000000	1.56090909	14.20745745	0.489916
23	-0.07997333	9.08504960	-0.72656170		23.00000000	1.49304348	13.56437405	0.511304
24	-0.07011987	9.09109780	-0.63746662		24.00000000	1.43083333	13.00784577	0.532780
25	-0.05997242	9.08486750	-0.54484146		25.00000000	1.37360000	12.47897400	0.554152
26	-0.04978998	9.09228710	-0.45270479		26.00000000	1.32076923	12.00881304	0.575505
27	-0.03997522	9.08674140	-0.36324447		27.00000000	1.27185185	11.55698888	0.596871
28	-0.02981437	9.09103110	-0.27104333		28.00000000	1.22642857	11.14950028	0.618354
29	-0.01998546	9.08506580	-0.18156924		29.00000000	1.18413793	10.75797102	0.639735
30	-0.00987969	9.10015110	-0.08990664		30.00000000	1.14466667	10.41663963	0.661079
31	-0.00058592	9.09345910	-0.00532801		31.00000000	1.10774194	10.07320598	0.682577
32	0.00955612	9.08802990	0.08684628		32.00000000	1.07312500	9.75259209	0.704062
33	0.01935944	9.08129120	0.17580869		33.00000000	1.04060606	9.45004666	0.725446
34	0.02951032	9.09831330	0.26849416		34.00000000	1.01000000	9.18929643	0.746800
35	0.03936723	9.07916830	0.35742170		35.00000000	0.98114286	8.90796113	0.768182
36	0.04946379	9.08905120	0.44957888		36.00000000	0.95388889	8.66994495	0.789670
37	0.05929092	9.09246920	0.53910085		37.00000000	0.92810811	8.43879439	0.811062
38	0.06944851	9.09313680	0.63150478		38.00000000	0.90368421	8.21732415	0.832415
39	0.07955772	9.08640100	0.72289332		39.00000000	0.88051282	8.00069257	0.853782
40	0.08941611	9.09255410	0.81302081		40.00000000	0.85850000	7.80595769	0.875258
41	0.09958560	9.09540650	0.90577151		41.00000000	0.83756098	7.61795754	0.896639
42	0.10937403	9.07661150	0.99274558		42.00000000	0.81761905	7.42121045	0.917982
43	0.11949738	9.09237100	1.08651451		43.00000000	0.79860465	7.26120977	0.939355
44	0.12933345	9.10151100	1.17712982		44.00000000	0.78045455	7.10331563	0.960823
45	0.13950592	9.08135320	1.26690253		45.00000000	0.76311111	6.93008153	0.982205
46	0.14933380	9.09548850	1.35826386		46.00000000	0.74652174	6.78997989	1.003580
47	0.15947650	9.09505940	1.45044824		47.00000000	0.73063830	6.64519872	1.024952
48	0.16960432	9.08103750	1.54018319		48.00000000	0.71541667	6.49672558	1.046435
49	0.17941731	9.08535960	1.63007078		49.00000000	0.70081633	6.36716834	1.067824
50	0.18954214	9.09993270	1.72482072		50.00000000	0.68680000	6.24983378	1.089205
51	0.19932909	9.09466740	1.81283178		51.00000000	0.67333333	6.12374272	1.110611
52	0.20949337	9.08830360	1.90393935		52.00000000	0.66038462	6.00177588	1.132094
53	0.21932051	9.09217070	1.99409951		53.00000000	0.64792453	5.89104041	1.153470
54	0.22945204	9.08776280	2.08520571		54.00000000	0.63592593	5.77914397	1.174849
55	0.23926504	9.09271620	2.17556911		55.00000000	0.62436364	5.67716135	1.196317
56	0.24943751	9.08553310	2.26627275		56.00000000	0.61321429	5.57137869	1.217697
57	0.25959733	9.09553810	2.36117741		57.00000000	0.60245614	5.47966278	1.239071
58	0.26941851	9.08869930	2.44866382		58.00000000	0.59206897	5.38113679	1.260450
59	0.27954483	9.06648830	2.53448993		59.00000000	0.58203390	5.27700353	1.281928
60	0.28941736	9.10214710	2.63431938		60.00000000	0.57233333	5.20946219	1.303314
61	0.29949158	9.08543010	2.72100982		61.00000000	0.56295082	5.11465032	1.324662
62	0.30932245	9.08627610	2.81058918		62.00000000	0.55387097	5.03262454	1.346034
63	0.31947929	9.07767960	2.90013063		63.00000000	0.54507937	4.94805583	1.367531
64	0.32932875	9.08356570	2.99147934		64.00000000	0.53656250	4.87390072	1.388905
65	0.33946699	9.06896020	3.07861262		65.00000000	0.52830769	4.79120143	1.410256
66	0.34930009	9.08817200	3.17449930		66.00000000	0.52030303	4.72860343	1.431639
67	0.35941598	9.09000970	3.26709474		67.00000000	0.51253731	4.65896915	1.453107
68	0.36961675	9.07754140	3.35521135		68.00000000	0.50500000	4.58415841	1.474498
69	0.37939253	9.08371640	3.44629415		69.00000000	0.49768116	4.52079451	1.495848
70	0.38957170	9.07600400	3.53575431		70.00000000	0.49057143	4.45242825	1.517224
71	0.39937577	9.08551980	3.62853647		71.00000000	0.48366197	4.39432042	1.538701
72	0.40954003	9.07507320	3.71660575		72.00000000	0.47694444	4.32830575	1.560075
73	0.41935080	9.07045360	3.80370197		73.00000000	0.47041096	4.26684078	1.581421
74	0.42949796	9.06884000	3.89504828		74.00000000	0.46405405	4.20843197	1.602801
75	0.43931246	9.07201580	3.98544958		75.00000000	0.45786667	4.15377363	1.624281
76	0.44947153	9.07206730	4.07763597		76.00000000	0.45184211	4.09914199	1.645651
77	0.45958295	9.05742260	4.16263700		77.00000000	0.44597403	4.03937522	1.667018
78	0.46946666	9.05069540	4.24899974		78.00000000	0.44025641	3.98462667	1.688376
79	0.47961310	9.03799920	4.33474281		79.00000000	0.43468354	3.92866953	1.709888
80	0.48941121	9.02752020	4.41816958		80.00000000	0.42925000	3.87506305	1.731271
81	0.49955538	9.01172260	4.50185451		81.00000000	0.42395062	3.82052536	1.752653
82	0.50935495	8.98783400	4.57799774		82.00000000	0.41878049	3.76392951	1.774009
83	0.51951927	8.97076700	4.66048632		83.00000000	0.41373494	3.71151974	1.795493
84	0.52927196	8.92868610	4.72570319		84.00000000	0.40880952	3.65013191	1.816874
85	0.53944218	8.87801550	4.78917604		85.00000000	0.40400000	3.58671826	1.838264
86	0.54957968	8.78159520	4.82618628		86.00000000	0.39930233	3.50651139	1.859761
87	0.55938303	8.69440650	4.86350345		87.00000000	0.39471264	3.43179217	1.881138
88	0.56952941	8.54966550	4.86928595		88.00000000	0.39022727	3.33631265	1.902496
89	0.57934022	8.36613750	4.84683994		89.00000000	0.38584270	3.22801305	1.923873
90	0.58944494	8.08554360	4.76598276		90.00000000	0.38155556	3.08508408	1.945350
91	0.59926987	7.73411080	4.63481957		91.00000000	0.37736264	2.91856445	1.966731
92	0.60938799	7.24465130	4.41480349		92.00000000	0.37326087	2.70414484	1.988195
93	0.61917120	6.62092350	4.09948515		93.00000000	0.36924731	2.44475820	2.009610
94	0.62926775	5.78507800	3.64036302		94.00000000	0.36531915	2.11339977	2.031150
95	0.63942015	4.70371720	3.00765156		95.00000000	0.36147368	1.70026999	2.052533
96	0.64917809	3.38930510	2.20026261		96.00000000	0.35770833	1.21238268	2.073886
97	0.65929472	1.71169280	1.12851003		97.00000000	0.35402062	0.60597454	2.095262
98	0.66903925	-0.25773835	-0.17243707		98.00000000	0.35040816	-0.09031362	2.116747
99	0.67912608	-2.66686870	-1.81114009		99.00000000	0.34686869	-0.92505324	2.138137
100	0.68884015	-5.44859410	-3.75321038		100.00000000	0.34340000	-1.87104721	2.159490
101	0.69912720	-8.79810910	-6.15099738		101.00000000	0.34000000	-2.99135709	2.180853
05:29 04/04/2018
Test Lot:	JK-PERC
Recipe:	Recipe_YJX-LID
Cell Name:	3-12-7h
Test Order:	4
Test Condition:	Light
1	-0.29992232	9.08728500	-2.72547960		1.00000000	34.34000000	312.05736690	0.000000
2	-0.29008466	9.08248420	-2.63468934		2.00000000	17.17000000	155.94625371	0.061796
3	-0.27996045	9.09663110	-2.54669694		3.00000000	11.44666667	104.12610399	0.083220
4	-0.27012801	9.07857890	-2.45237845		4.00000000	8.58500000	77.93959986	0.104717
5	-0.25996658	9.10134890	-2.36604655		5.00000000	6.86800000	62.50806425	0.126117
6	-0.24976572	9.08695320	-2.26960941		6.00000000	5.72333333	52.00766215	0.147462
7	-0.23992880	9.09058670	-2.18109356		7.00000000	4.90571429	44.59582104	0.168839
8	-0.22985372	9.09489250	-2.09049487		8.00000000	4.29250000	39.03982606	0.190318
9	-0.22002797	9.09083650	-2.00023830		9.00000000	3.81555556	34.68659171	0.211696
10	-0.20984496	9.08289620	-1.90599999		10.00000000	3.43400000	31.19066555	0.233104
11	-0.20000060	9.08849720	-1.81770489		11.00000000	3.12181818	28.37263580	0.254500
12	-0.18988086	9.08077530	-1.72426542		12.00000000	2.86166667	25.98615198	0.275993
13	-0.18007298	9.10132410	-1.63890255		13.00000000	2.64153846	24.04149766	0.297366
14	-0.16994207	9.08938500	-1.54466890		14.00000000	2.45285714	22.29496292	0.318769
15	-0.16013046	9.08717820	-1.45513403		15.00000000	2.28933333	20.80357996	0.340114
16	-0.14998020	9.09183980	-1.36359595		16.00000000	2.14625000	19.51336117	0.361585
17	-0.13982177	9.08241560	-1.26991943		17.00000000	2.02000000	18.34647951	0.382968
18	-0.12998708	9.10590170	-1.18364957		18.00000000	1.90777778	17.37203691	0.404344
19	-0.11987702	9.08007720	-1.08849260		19.00000000	1.80736842	16.41104479	0.425764
20	-0.11004084	9.10342030	-1.00174802		20.00000000	1.71700000	15.63057266	0.447247
21	-0.09987496	9.09071160	-0.90793444		21.00000000	1.63523810	14.86547792	0.468617
22	-0.09008716	9.09558680	-0.81939558		22.00000000	1.56090909	14.19738412	0.490033
23	-0.07991979	9.08488370	-0.72606202		23.00000000	1.49304348	13.56412636	0.511393
24	-0.07013869	9.09317970	-0.63778374		24.00000000	1.43083333	13.01082462	0.532879
25	-0.05995495	9.08835320	-0.54489175		25.00000000	1.37360000	12.48376196	0.554269
26	-0.04976897	9.09518910	-0.45265818		26.00000000	1.32076923	12.01264591	0.575645
27	-0.03997448	9.09856700	-0.36371046		27.00000000	1.27185185	11.57202929	0.597010
28	-0.02984804	9.08462050	-0.27115811		28.00000000	1.22642857	11.14163814	0.618502
29	-0.02004238	9.09471890	-0.18227981		29.00000000	1.18413793	10.76940162	0.639869
30	-0.00988841	9.08410260	-0.08982729		30.00000000	1.14466667	10.39826944	0.661258
31	-0.00065881	9.07668110	-0.00597977		31.00000000	1.10774194	10.05462029	0.682724
32	0.00949719	9.10599520	0.08648140		32.00000000	1.07312500	9.77187110	0.704211
33	0.01931671	9.08381080	0.17546938		33.00000000	1.04060606	9.45266857	0.725603
34	0.02946147	9.08373550	0.26762018		34.00000000	1.01000000	9.17457286	0.746993
35	0.03929215	9.08824830	0.35709684		35.00000000	0.98114286	8.91686990	0.768479
36	0.04943170	9.09803770	0.44973144		36.00000000	0.95388889	8.67851707	0.789864
37	0.05924005	9.08521270	0.53820849		37.00000000	0.92810811	8.43205957	0.811270
38	0.06941607	9.09698010	0.63147659		38.00000000	0.90368421	8.22079728	0.832646
39	0.07958166	9.08420470	0.72293605		39.00000000	0.88051282	7.99875870	0.854134
40	0.08939299	9.09451870	0.81298622		40.00000000	0.85850000	7.80764430	0.875518
41	0.09955263	9.10048770	0.90597749		41.00000000	0.83756098	7.62221336	0.896859
42	0.10932303	9.08451180	0.99314636		42.00000000	0.81761905	7.42766989	0.918244
43	0.11952658	9.08446310	1.08583481		43.00000000	0.79860465	7.25489448	0.939727
44	0.12933345	9.08519940	1.17502018		44.00000000	0.78045455	7.09058517	0.961159
45	0.13950723	9.08836650	1.26789284		45.00000000	0.76311111	6.93543346	0.982517
46	0.14930293	9.09425450	1.35779884		46.00000000	0.74652174	6.78905869	1.003889
47	0.15943056	9.08340840	1.44817289		47.00000000	0.73063830	6.63668605	1.025365
48	0.16959691	9.09181980	1.54194454		48.00000000	0.71541667	6.50443942	1.046743
49	0.17940749	9.08182620	1.62934764		49.00000000	0.70081633	6.36469208	1.068106
50	0.18954332	9.09362030	1.72363498		50.00000000	0.68680000	6.24549842	1.089486
51	0.19934125	9.08197020	1.81041129		51.00000000	0.67333333	6.11519327	1.110973
52	0.20947708	9.08156590	1.90237991		52.00000000	0.66038462	5.99732640	1.132351
53	0.21931893	9.09623050	1.99497554		53.00000000	0.64792453	5.89367086	1.153712
54	0.22944954	9.08395290	2.08430881		54.00000000	0.63592593	5.77672116	1.175096
55	0.23928766	9.09093670	2.17534897		55.00000000	0.62436364	5.67605030	1.196592
56	0.24941158	9.08743860	2.26651242		56.00000000	0.61321429	5.57254717	1.218002
57	0.25953773	9.08883090	2.35889454		57.00000000	0.60245614	5.47562198	1.239377
58	0.26939595	9.08806610	2.44828820		58.00000000	0.59206897	5.38076189	1.260741
59	0.27952433	9.09167770	2.54134512		59.00000000	0.58203390	5.29166461	1.282228
60	0.28935948	9.07470990	2.62585334		60.00000000	0.57233333	5.19375897	1.303610
61	0.29949531	9.08473870	2.72083663		61.00000000	0.56295082	5.11426110	1.325013
62	0.30934682	9.08034610	2.80897619		62.00000000	0.55387097	5.02934008	1.346375
63	0.31944171	9.09335710	2.90479754		63.00000000	0.54507937	4.95660131	1.367849
64	0.32930589	9.08459190	2.99160962		64.00000000	0.53656250	4.87445134	1.389237
65	0.33942682	9.08870700	3.08495091		65.00000000	0.52830769	4.80163382	1.410616
66	0.34921882	9.08698650	3.17334670		66.00000000	0.52030303	4.72798661	1.432101
67	0.35939482	9.07798960	3.26258244		67.00000000	0.51253731	4.65280840	1.453491
68	0.36956787	9.07496360	3.35381497		68.00000000	0.50500000	4.58285662	1.474846
69	0.37938216	9.07570840	3.44316186		69.00000000	0.49768116	4.51680908	1.496219
70	0.38952917	9.07313630	3.53425125		70.00000000	0.49057143	4.45102144	1.517703
71	0.39936504	9.07602690	3.62464785		71.00000000	0.48366197	4.38972907	1.539081
72	0.40951577	9.07771780	3.71746859		72.00000000	0.47694444	4.32956707	1.560437
73	0.41934049	9.06552600	3.80154211		73.00000000	0.47041096	4.26452278	1.581820
74	0.42950386	9.06968500	3.89546472		74.00000000	0.46405405	4.20882409	1.603311
75	0.43929359	9.07020760	3.98448406		75.00000000	0.45786667	4.15294572	1.624701
76	0.44947258	9.06417080	4.07409624		76.00000000	0.45184211	4.09557402	1.646045
77	0.45958981	9.05443670	4.16132684		77.00000000	0.44597403	4.03804359	1.667419
78	0.46943313	9.05726340	4.25177951		78.00000000	0.44025641	3.98751827	1.688900
79	0.47960246	9.03278730	4.33214701		79.00000000	0.43468354	3.92640400	1.710273
80	0.48942494	9.02252390	4.41584822		80.00000000	0.42925000	3.87291838	1.731626
81	0.49953100	9.01496220	4.50325308		81.00000000	0.42395062	3.82189879	1.753006
82	0.50933939	8.98455140	4.57618593		82.00000000	0.41878049	3.76255482	1.774480
83	0.51948935	8.96033100	4.65479653		83.00000000	0.41373494	3.70720201	1.795855
84	0.52929622	8.92210480	4.72243635		84.00000000	0.40880952	3.64744141	1.817230
85	0.53943276	8.86907580	4.78427004		85.00000000	0.40400000	3.58310662	1.838611
86	0.54954922	8.78947260	4.83024781		86.00000000	0.39930233	3.50965685	1.860100
87	0.55937469	8.70134540	4.86731239		87.00000000	0.39471264	3.43453105	1.881488
88	0.56950456	8.54399200	4.86584240		88.00000000	0.39022727	3.33409870	1.902857
89	0.57931221	8.36174870	4.84406312		89.00000000	0.38584270	3.22631967	1.924230
90	0.58946961	8.09215550	4.77007975		90.00000000	0.38155556	3.08760689	1.945712
91	0.59923184	7.74640560	4.64189288		91.00000000	0.37736264	2.92320405	1.967092
92	0.60935646	7.25195460	4.41902538		92.00000000	0.37326087	2.70687088	1.988597
93	0.61919314	6.63172200	4.10631677		93.00000000	0.36924731	2.44874552	2.010010
94	0.62924927	5.78667880	3.64126341		94.00000000	0.36531915	2.11398457	2.031494
95	0.63942087	4.72100310	3.01870791		95.00000000	0.36147368	1.70651838	2.052886
96	0.64918005	3.39621970	2.20475807		96.00000000	0.35770833	1.21485609	2.074274
97	0.65927798	1.70819570	1.12617581		97.00000000	0.35402062	0.60473650	2.095771
98	0.66902381	-0.26243570	-0.17557573		98.00000000	0.35040816	-0.09195961	2.117171
99	0.67911792	-2.71355630	-1.84282471		99.00000000	0.34686869	-0.94124771	2.138520
100	0.68881613	-5.50596050	-3.79259440		100.00000000	0.34340000	-1.89074684	2.159904
101	0.69906729	-8.89137360	-6.21566845		101.00000000	0.34000000	-3.02306702	2.181379
