# Supplementary material for: Study on the Electrical Injection Regeneration of Industrialized B-Doped Czochralski Silicon PERC Solar Cells
Source: Hindawi journal article supplement (doi:10.1155/2019/5357370), 2019-06-20
Supplement: f1 [file 5357370.f1.zip › section3.3/IVRawData_3-12-8h.csv]

06:30 04/04/2018
Test Lot:	JK-PERC
Recipe:	Recipe_YJX-LID
Cell Name:	3-12-8h
Test Order:	2
Test Condition:	Light
1	-0.29988194	9.08911230	-2.72566063		1.00000000	34.34000000	312.12011638	0.000000
2	-0.29005614	9.09920690	-2.63928083		2.00000000	17.17000000	156.23338247	0.061774
3	-0.27994236	9.08557220	-2.54343652		3.00000000	11.44666667	103.99951645	0.083246
4	-0.27015975	9.09500790	-2.45710506		4.00000000	8.58500000	78.08064282	0.104741
5	-0.25996259	9.08619310	-2.36207029		5.00000000	6.86800000	62.40397421	0.126124
6	-0.24981901	9.09098430	-2.27110070		6.00000000	5.72333333	52.03073348	0.147487
7	-0.23997018	9.09430030	-2.18236088		7.00000000	4.90571429	44.61403890	0.168862
8	-0.22983627	9.09167390	-2.08959642		8.00000000	4.29250000	39.02601022	0.190350
9	-0.21998742	9.09804730	-2.00145595		9.00000000	3.81555556	34.71410492	0.211724
10	-0.20984237	9.08930400	-1.90732109		10.00000000	3.43400000	31.21266994	0.233093
11	-0.19998161	9.08826730	-1.81748633		11.00000000	3.12181818	28.37191810	0.254447
12	-0.18984847	9.08286670	-1.72436835		12.00000000	2.86166667	25.99213687	0.275928
13	-0.18007331	9.09039880	-1.63693820		13.00000000	2.64153846	24.01263806	0.297301
14	-0.16994387	9.08090400	-1.54324397		14.00000000	2.45285714	22.27416024	0.318695
15	-0.16014564	9.09640310	-1.45674930		15.00000000	2.28933333	20.82469883	0.340041
16	-0.14992689	9.10060600	-1.36442555		16.00000000	2.14625000	19.53217563	0.361508
17	-0.13984956	9.06785870	-1.26813605		17.00000000	2.02000000	18.31707457	0.382890
18	-0.13000816	9.09824090	-1.18284556		18.00000000	1.90777778	17.35742181	0.404285
19	-0.11982365	9.09419060	-1.08969911		19.00000000	1.80736842	16.43655291	0.425766
20	-0.11003509	9.09129810	-1.00036180		20.00000000	1.71700000	15.60975884	0.447158
21	-0.09989896	9.09053040	-0.90813451		21.00000000	1.63523810	14.86518162	0.468501
22	-0.09003747	9.07996460	-0.81753699		22.00000000	1.56090909	14.17299929	0.489873
23	-0.07995567	9.10092450	-0.72767049		23.00000000	1.49304348	13.58807597	0.511366
24	-0.07010905	9.06479260	-0.63552403		24.00000000	1.43083333	12.97020741	0.532735
25	-0.05993422	9.08015630	-0.54421209		25.00000000	1.37360000	12.47250269	0.554111
26	-0.04979586	9.09466270	-0.45287654		26.00000000	1.32076923	12.01195066	0.575492
27	-0.04000134	9.09329220	-0.36374391		27.00000000	1.27185185	11.56532052	0.596959
28	-0.02981386	9.07521530	-0.27056721		28.00000000	1.22642857	11.13010334	0.618354
29	-0.02002828	9.08445930	-0.18194608		29.00000000	1.18413793	10.75725284	0.639700
30	-0.00986610	9.09776020	-0.08975941		30.00000000	1.14466667	10.41390284	0.661072
31	-0.00060671	9.07206920	-0.00550414		31.00000000	1.10774194	10.04951149	0.682662
32	0.00948604	9.09838580	0.08630768		32.00000000	1.07312500	9.76370526	0.704044
33	0.01935173	9.08799550	0.17586839		33.00000000	1.04060606	9.45702320	0.725390
34	0.02950692	9.08308890	0.26801394		34.00000000	1.01000000	9.17391979	0.746779
35	0.03928031	9.08705620	0.35694238		35.00000000	0.98114286	8.91570028	0.768262
36	0.04945560	9.09582610	0.44983952		36.00000000	0.95388889	8.67640745	0.789635
37	0.05928704	9.08940410	0.53888387		37.00000000	0.92810811	8.43594964	0.810989
38	0.06940279	9.09246440	0.63104242		38.00000000	0.90368421	8.21671651	0.832376
39	0.07956096	9.08014680	0.72242518		39.00000000	0.88051282	7.99518567	0.853854
40	0.08943632	9.09366610	0.81330399		40.00000000	0.85850000	7.80691235	0.875249
41	0.09954164	9.08308410	0.90414511		41.00000000	0.83756098	7.60763678	0.896605
42	0.10935002	9.10304740	0.99541842		42.00000000	0.81761905	7.44282495	0.917969
43	0.11950372	9.08004950	1.08509969		43.00000000	0.79860465	7.25136976	0.939452
44	0.12932773	9.08947750	1.17552149		44.00000000	0.78045455	7.09392403	0.960830
45	0.13947026	9.08729460	1.26740734		45.00000000	0.76311111	6.93461548	0.982222
46	0.14927864	9.07989790	1.35543481		46.00000000	0.74652174	6.77834117	1.003560
47	0.15947625	9.10286710	1.45169111		47.00000000	0.73063830	6.65090332	1.025025
48	0.16957711	9.07339950	1.53864087		48.00000000	0.71541667	6.49126123	1.046407
49	0.17944801	9.09008690	1.63119800		49.00000000	0.70081633	6.37048131	1.067806
50	0.18961659	9.08881000	1.72338916		50.00000000	0.68680000	6.24219471	1.089292
51	0.19935203	9.09354590	1.81281684		51.00000000	0.67333333	6.12298757	1.110686
52	0.20948489	9.08787730	1.90377298		52.00000000	0.66038462	6.00149436	1.132041
53	0.21934611	9.08071420	1.99181934		53.00000000	0.64792453	5.88361746	1.153410
54	0.22946110	9.08682060	2.08507185		54.00000000	0.63592593	5.77854480	1.174893
55	0.23925608	9.08596610	2.17387263		55.00000000	0.62436364	5.67294683	1.196268
56	0.24946858	9.10562710	2.27156786		56.00000000	0.61321429	5.58370062	1.217609
57	0.25958955	9.07197380	2.35498960		57.00000000	0.60245614	5.46546632	1.238991
58	0.26944035	9.09642510	2.45094396		58.00000000	0.59206897	5.38571100	1.260467
59	0.27954641	9.07030490	2.53557117		59.00000000	0.58203390	5.27922492	1.281853
60	0.28939721	9.09511850	2.63210192		60.00000000	0.57233333	5.20543949	1.303198
61	0.29949287	9.07880780	2.71903820		61.00000000	0.56295082	5.11092229	1.324575
62	0.30931613	9.07535840	2.80715474		62.00000000	0.55387097	5.02657754	1.346043
63	0.31949365	9.09602260	2.90612146		63.00000000	0.54507937	4.95805422	1.367421
64	0.32933700	9.08227250	2.99112838		64.00000000	0.53656250	4.87320684	1.388767
65	0.33945200	9.08498290	3.08391562		65.00000000	0.52830769	4.79966635	1.410145
66	0.34927601	9.08961960	3.17478607		66.00000000	0.52030303	4.72935662	1.431612
67	0.35945055	9.07852460	3.26328066		67.00000000	0.51253731	4.65308261	1.452997
68	0.36959532	9.07498170	3.35407077		68.00000000	0.50500000	4.58286576	1.474353
69	0.37942153	9.07323550	3.44258090		69.00000000	0.49768116	4.51557836	1.495715
70	0.38954622	9.08640670	3.53957538		70.00000000	0.49057143	4.45753152	1.517198
71	0.39938289	9.08265020	3.62745509		71.00000000	0.48366197	4.39293251	1.538570
72	0.40950534	9.06470580	3.71204543		72.00000000	0.47694444	4.32336107	1.559936
73	0.41934422	9.07342240	3.80488724		73.00000000	0.47041096	4.26823733	1.581318
74	0.42948675	9.05961890	3.89098628		74.00000000	0.46405405	4.20415288	1.602786
75	0.43928471	9.06850240	3.98365445		75.00000000	0.45786667	4.15216497	1.624161
76	0.44945627	9.05606080	4.07030331		76.00000000	0.45184211	4.09190958	1.645548
77	0.45957053	9.05317590	4.16057285		77.00000000	0.44597403	4.03748130	1.666896
78	0.46944961	9.04030700	4.24396860		78.00000000	0.44025641	3.98005311	1.688377
79	0.47961000	9.02529340	4.32862097		79.00000000	0.43468354	3.92314652	1.709759
80	0.48942658	9.03301050	4.42099544		80.00000000	0.42925000	3.87741976	1.731140
81	0.49951628	9.01141640	4.50134920		81.00000000	0.42395062	3.82039555	1.752619
82	0.50939757	8.99348260	4.58125818		82.00000000	0.41878049	3.76629503	1.774002
83	0.51949996	8.94423870	4.64653165		83.00000000	0.41373494	3.70054406	1.795349
84	0.52926737	8.93028450	4.72650819		84.00000000	0.40880952	3.65078535	1.816723
85	0.53941435	8.85830210	4.77829527		85.00000000	0.40400000	3.57875405	1.838211
86	0.54953015	8.78745750	4.82897284		86.00000000	0.39930233	3.50885222	1.859591
87	0.55939955	8.67982010	4.85548746		87.00000000	0.39471264	3.42603474	1.880947
88	0.56950557	8.54965500	4.86907614		88.00000000	0.39022727	3.33630855	1.902330
89	0.57931846	8.33392140	4.82799451		89.00000000	0.38584270	3.21558271	1.923799
90	0.58944386	8.06812950	4.75570940		90.00000000	0.38155556	3.07843963	1.945180
91	0.59927905	7.71179390	4.62151652		91.00000000	0.37736264	2.91014288	1.966519
92	0.60936946	7.21329360	4.39556083		92.00000000	0.37326087	2.69244024	1.987997
93	0.61916298	6.56984330	4.06780376		93.00000000	0.36924731	2.42589698	2.009515
94	0.62931669	5.74898530	3.61793240		94.00000000	0.36531915	2.10021442	2.030889
95	0.63939595	4.66414930	2.98223817		95.00000000	0.36147368	1.68596723	2.052235
96	0.64921325	3.35153130	2.17585853		96.00000000	0.35770833	1.19887068	2.073660
97	0.65930516	1.69457460	1.11724178		97.00000000	0.35402062	0.59991435	2.095146
98	0.66903168	-0.26930907	-0.18017630		98.00000000	0.35040816	-0.09436810	2.116531
99	0.67913777	-2.63502860	-1.78954745		99.00000000	0.34686869	-0.91400891	2.137892
100	0.68886054	-5.35101030	-3.68609984		100.00000000	0.34340000	-1.83753694	2.159276
101	0.69905519	-8.60794830	-6.01743093		101.00000000	0.34000000	-2.92670242	2.180750
06:30 04/04/2018
Test Lot:	JK-PERC
Recipe:	Recipe_YJX-LID
Cell Name:	3-12-8h
Test Order:	3
Test Condition:	Light
1	-0.29998001	9.09172440	-2.72733558		1.00000000	34.34000000	312.20981590	0.000000
2	-0.29015931	9.09484860	-2.63895499		2.00000000	17.17000000	156.15855046	0.061809
3	-0.27997836	9.09242530	-2.54568232		3.00000000	11.44666667	104.07796160	0.083235
4	-0.27016065	9.06508920	-2.44903039		4.00000000	8.58500000	77.82379078	0.104734
5	-0.25997078	9.09719850	-2.36500579		5.00000000	6.86800000	62.47955930	0.126110
6	-0.24986503	9.08886240	-2.27098888		6.00000000	5.72333333	52.01858914	0.147451
7	-0.24003316	9.09485530	-2.18306686		7.00000000	4.90571429	44.61676157	0.168833
8	-0.22981279	9.07345870	-2.08519686		8.00000000	4.29250000	38.94782147	0.190300
9	-0.22001590	9.09524730	-2.00109902		9.00000000	3.81555556	34.70342136	0.211680
10	-0.20992354	9.08262730	-1.90665728		10.00000000	3.43400000	31.18974215	0.233063
11	-0.19999640	9.09275910	-1.81851909		11.00000000	3.12181818	28.38594068	0.254408
12	-0.18996358	9.08141900	-1.72513886		12.00000000	2.86166667	25.98799404	0.275877
13	-0.18013692	9.09335800	-1.63804950		13.00000000	2.64153846	24.02045490	0.297242
14	-0.16995451	9.08584690	-1.54418066		14.00000000	2.45285714	22.28628447	0.318621
15	-0.16017994	9.07339190	-1.45337537		15.00000000	2.28933333	20.77201852	0.340080
16	-0.14998414	9.09630200	-1.36430103		16.00000000	2.14625000	19.52293817	0.361536
17	-0.13986722	9.08169080	-1.27023085		17.00000000	2.02000000	18.34501542	0.382902
18	-0.13008000	9.07837490	-1.18091501		18.00000000	1.90777778	17.31952189	0.404285
19	-0.11996531	9.10103510	-1.09180850		19.00000000	1.80736842	16.44892344	0.425630
20	-0.11010442	9.08819960	-1.00065095		20.00000000	1.71700000	15.60443871	0.447177
21	-0.09992795	9.08063320	-0.90740910		21.00000000	1.63523810	14.84899734	0.468563
22	-0.09018317	9.07913590	-0.81878525		22.00000000	1.56090909	14.17170576	0.489929
23	-0.08005656	9.07948300	-0.72687220		23.00000000	1.49304348	13.55606288	0.511295
24	-0.07012050	9.08640380	-0.63714317		24.00000000	1.43083333	13.00112944	0.532768
25	-0.06003037	9.08827780	-0.54557269		25.00000000	1.37360000	12.48365839	0.554165
26	-0.04991568	9.08316330	-0.45339230		26.00000000	1.32076923	11.99676260	0.575560
27	-0.04004065	9.08491520	-0.36376590		27.00000000	1.27185185	11.55466622	0.596937
28	-0.02988651	9.09526060	-0.27182560		28.00000000	1.22642857	11.15468746	0.618409
29	-0.02009260	9.08041480	-0.18244917		29.00000000	1.18413793	10.75246359	0.639788
30	-0.00987967	9.09642030	-0.08986961		30.00000000	1.14466667	10.41236910	0.661171
31	-0.00067374	9.09022900	-0.00612442		31.00000000	1.10774194	10.06962787	0.682754
32	0.00947498	9.08427430	0.08607334		32.00000000	1.07312500	9.74856186	0.704144
33	0.01937281	9.09988020	0.17629023		33.00000000	1.04060606	9.46939049	0.725504
34	0.02941204	9.07569790	0.26693479		34.00000000	1.01000000	9.16645488	0.746879
35	0.03927042	9.08848000	0.35690843		35.00000000	0.98114286	8.91709723	0.768357
36	0.04942427	9.08728030	0.44913215		36.00000000	0.95388889	8.66825571	0.789725
37	0.05923204	9.08575630	0.53816786		37.00000000	0.92810811	8.43256409	0.811095
38	0.06934570	9.08286090	0.62985733		38.00000000	0.90368421	8.20803798	0.832468
39	0.07952857	9.08792400	0.72274960		39.00000000	0.88051282	8.00203359	0.853944
40	0.08936387	9.08452320	0.81182818		40.00000000	0.85850000	7.79906317	0.875325
41	0.09951624	9.08013730	0.90362108		41.00000000	0.83756098	7.60516866	0.896674
42	0.10933219	9.08270930	0.99303250		42.00000000	0.81761905	7.42619613	0.918054
43	0.11945701	9.09384540	1.08632358		43.00000000	0.79860465	7.26238723	0.939529
44	0.12924618	9.08477020	1.17417184		44.00000000	0.78045455	7.09025020	0.960908
45	0.13947818	9.08120540	1.26663000		45.00000000	0.76311111	6.92996874	0.982260
46	0.14926510	9.08887580	1.35665196		46.00000000	0.74652174	6.78504337	1.003646
47	0.15940407	9.08879570	1.44879103		47.00000000	0.73063830	6.64062222	1.025119
48	0.16949762	9.09399890	1.54141117		48.00000000	0.71541667	6.50599838	1.046485
49	0.17940214	9.08441640	1.62976374		49.00000000	0.70081633	6.36650733	1.067845
50	0.18948530	9.07981680	1.72049181		50.00000000	0.68680000	6.23601818	1.089220
51	0.19926478	9.07530400	1.80838845		51.00000000	0.67333333	6.11070469	1.110701
52	0.20942757	9.09259410	1.90423989		52.00000000	0.66038462	6.00460926	1.132086
53	0.21932836	9.08098320	1.99171715		53.00000000	0.64792453	5.88379176	1.153441
54	0.22944202	9.08151910	2.08368209		54.00000000	0.63592593	5.77517344	1.174809
55	0.23918355	9.08086680	2.17199396		55.00000000	0.62436364	5.66976302	1.196324
56	0.24943563	9.08255200	2.26551208		56.00000000	0.61321429	5.56955064	1.217701
57	0.25953293	9.09182450	2.35962785		57.00000000	0.60245614	5.47742550	1.239095
58	0.26939949	9.07261940	2.44415904		58.00000000	0.59206897	5.37161638	1.260454
59	0.27946329	9.08216190	2.53813084		59.00000000	0.58203390	5.28612610	1.281930
60	0.28927255	9.08652110	2.62848113		60.00000000	0.57233333	5.20051891	1.303323
61	0.29946285	9.08516220	2.72066857		61.00000000	0.56295082	5.11449951	1.324700
62	0.30925128	9.08883380	2.81073349		62.00000000	0.55387097	5.03404117	1.346186
63	0.31941032	9.07865050	2.89981466		63.00000000	0.54507937	4.94858505	1.367581
64	0.32925978	9.08450130	2.99116090		64.00000000	0.53656250	4.87440273	1.388941
65	0.33948061	9.08346370	3.08365980		65.00000000	0.52830769	4.79886375	1.410317
66	0.34919685	9.07948490	3.17052753		66.00000000	0.52030303	4.72408351	1.431790
67	0.35932091	9.08242890	3.26350662		67.00000000	0.51253731	4.65508371	1.453167
68	0.36952165	9.08200450	3.35599729		68.00000000	0.50500000	4.58641227	1.474519
69	0.37938374	9.06573490	3.43939241		69.00000000	0.49768116	4.51184546	1.495895
70	0.38948402	9.08174130	3.53719311		70.00000000	0.49057143	4.45524280	1.517366
71	0.39934313	9.07847210	3.62542546		71.00000000	0.48366197	4.39091172	1.538741
72	0.40945008	9.06582550	3.71200298		72.00000000	0.47694444	4.32389511	1.560098
73	0.41928393	9.07106690	3.80335258		73.00000000	0.47041096	4.26712928	1.581474
74	0.42943105	9.06155780	3.89131428		74.00000000	0.46405405	4.20505263	1.602953
75	0.43933409	9.06349370	3.98190176		75.00000000	0.45786667	4.14987165	1.624325
76	0.44935545	9.06603720	4.07387323		76.00000000	0.45184211	4.09641733	1.645661
77	0.45942745	9.03855710	4.15256124		77.00000000	0.44597403	4.03096170	1.667043
78	0.46940938	9.04300690	4.24487226		78.00000000	0.44025641	3.98124176	1.688519
79	0.47954610	9.01955220	4.32529108		79.00000000	0.43468354	3.92065092	1.709906
80	0.48935387	9.02795980	4.41786707		80.00000000	0.42925000	3.87525174	1.731256
81	0.49953824	9.00720410	4.49944288		81.00000000	0.42395062	3.81860974	1.752625
82	0.50930732	8.97833920	4.57273388		82.00000000	0.41878049	3.75995327	1.774089
83	0.51940089	8.96082120	4.65425851		83.00000000	0.41373494	3.70740482	1.795471
84	0.52929717	8.90771770	4.71482977		84.00000000	0.40880952	3.64155983	1.816833
85	0.53937662	8.88447670	4.79207901		85.00000000	0.40400000	3.58932859	1.838205
86	0.54951334	8.77165130	4.82013940		86.00000000	0.39930233	3.50254076	1.859671
87	0.55932337	8.69690040	4.86437964		87.00000000	0.39471264	3.43277655	1.881049
88	0.56943852	8.55326080	4.87055617		88.00000000	0.39022727	3.33771563	1.902444
89	0.57927901	8.34593110	4.83462271		89.00000000	0.38584270	3.22021656	1.923792
90	0.58940756	8.09207060	4.76952759		90.00000000	0.38155556	3.08757449	1.945277
91	0.59923095	7.74476620	4.64090361		91.00000000	0.37736264	2.92258540	1.966659
92	0.60930812	7.24099350	4.41199614		92.00000000	0.37326087	2.70277953	1.988142
93	0.61912411	6.62515970	4.10179610		93.00000000	0.36924731	2.44632241	2.009708
94	0.62918419	5.78417440	3.63931108		94.00000000	0.36531915	2.11306967	2.031090
95	0.63933134	4.70668940	3.00913404		95.00000000	0.36147368	1.70134436	2.052433
96	0.64911604	3.39676520	2.20489478		96.00000000	0.35770833	1.21505122	2.073862
97	0.65924460	1.70673950	1.12515880		97.00000000	0.35402062	0.60422097	2.095341
98	0.66899353	-0.26940292	-0.18022881		98.00000000	0.35040816	-0.09440098	2.116723
99	0.67904466	-2.70440150	-1.83640940		99.00000000	0.34686869	-0.93807220	2.138088
100	0.68871254	-5.48720310	-3.77910558		100.00000000	0.34340000	-1.88430554	2.159457
101	0.69902414	-8.88879680	-6.21348354		101.00000000	0.34000000	-3.02219091	2.180933
06:30 04/04/2018
Test Lot:	JK-PERC
Recipe:	Recipe_YJX-LID
Cell Name:	3-12-8h
Test Order:	4
Test Condition:	Light
1	-0.29987815	9.07763390	-2.72218406		1.00000000	34.34000000	311.72594813	0.000000
2	-0.29000771	9.09053800	-2.63632611		2.00000000	17.17000000	156.08453746	0.061789
3	-0.27988121	9.07316970	-2.53940971		3.00000000	11.44666667	103.85754917	0.083256
4	-0.27000108	9.08685110	-2.45345961		4.00000000	8.58500000	78.01061669	0.104761
5	-0.25990438	9.07738210	-2.35925137		5.00000000	6.86800000	62.34346026	0.126151
6	-0.24978907	9.08341120	-2.26893684		6.00000000	5.72333333	51.98739010	0.147529
7	-0.23987249	9.08281040	-2.17871635		7.00000000	4.90571429	44.55767273	0.168894
8	-0.22978693	9.09032440	-2.08883774		8.00000000	4.29250000	39.02021749	0.190375
9	-0.21993509	9.08713820	-1.99858056		9.00000000	3.81555556	34.67248064	0.211753
10	-0.20979597	9.08884910	-1.90680391		10.00000000	3.43400000	31.21110781	0.233127
11	-0.19997463	9.08890720	-1.81755085		11.00000000	3.12181818	28.37391575	0.254484
12	-0.18985708	9.08495330	-1.72484271		12.00000000	2.86166667	25.99810803	0.275958
13	-0.18007000	9.08551410	-1.63602852		13.00000000	2.64153846	23.99973494	0.297332
14	-0.16989812	9.07523920	-1.54186608		14.00000000	2.45285714	22.26026529	0.318717
15	-0.16003139	9.08290770	-1.45355034		15.00000000	2.28933333	20.79380336	0.340192
16	-0.14988630	9.09239860	-1.36282598		16.00000000	2.14625000	19.51456050	0.361563
17	-0.13970251	9.07930090	-1.26840112		17.00000000	2.02000000	18.34018782	0.382920
18	-0.12991914	9.09443760	-1.18154151		18.00000000	1.90777778	17.35016595	0.404290
19	-0.11985965	9.08359530	-1.08875655		19.00000000	1.80736842	16.41740329	0.425758
20	-0.10997059	9.09196090	-0.99984830		20.00000000	1.71700000	15.61089687	0.447137
21	-0.09990515	9.07993890	-0.90713264		21.00000000	1.63523810	14.84786199	0.468495
22	-0.09003544	9.08483980	-0.81795754		22.00000000	1.56090909	14.18060903	0.489870
23	-0.07985166	9.08369540	-0.72534813		23.00000000	1.49304348	13.56235218	0.511344
24	-0.07007870	9.08749200	-0.63683963		24.00000000	1.43083333	13.00268647	0.532721
25	-0.05983314	9.08811280	-0.54377035		25.00000000	1.37360000	12.48343174	0.554084
26	-0.04969550	9.09026430	-0.45174522		26.00000000	1.32076923	12.00614139	0.575472
27	-0.03992776	9.07952500	-0.36252508		27.00000000	1.27185185	11.54781069	0.596958
28	-0.02977449	9.09427740	-0.27077744		28.00000000	1.22642857	11.15348164	0.618356
29	-0.01996730	9.08403400	-0.18138362		29.00000000	1.18413793	10.75674923	0.639695
30	-0.00981924	9.08527090	-0.08921044		30.00000000	1.14466667	10.39960676	0.661054
31	-0.00064840	9.08395580	-0.00589001		31.00000000	1.10774194	10.06267878	0.682647
32	0.00964384	9.08356480	0.08760044		32.00000000	1.07312500	9.74780048	0.704020
33	0.01944628	9.08344650	0.17663926		33.00000000	1.04060606	9.45228948	0.725358
34	0.02945414	9.08519360	0.26759653		34.00000000	1.01000000	9.17604554	0.746738
35	0.03930942	9.08378700	0.35707840		35.00000000	0.98114286	8.91249273	0.768219
36	0.04957106	9.07861330	0.45003651		36.00000000	0.95388889	8.65998835	0.789604
37	0.05928271	9.07719520	0.53812069		37.00000000	0.92810811	8.42461846	0.810963
38	0.06952798	9.09186940	0.63213928		38.00000000	0.90368421	8.21617882	0.832335
39	0.07960058	9.08564950	0.72322297		39.00000000	0.88051282	8.00003087	0.853816
40	0.08946852	9.08158870	0.81251626		40.00000000	0.85850000	7.79654390	0.875201
41	0.09966392	9.09489150	0.90643255		41.00000000	0.83756098	7.61752620	0.896571
42	0.10937705	9.08143230	0.99330027		42.00000000	0.81761905	7.42515203	0.917925
43	0.11960892	9.07520870	1.08547591		43.00000000	0.79860465	7.24750388	0.939408
44	0.12938903	9.08689980	1.17574515		44.00000000	0.78045455	7.09191225	0.960773
45	0.13948770	9.08673950	1.26748839		45.00000000	0.76311111	6.93419188	0.982160
46	0.14936456	9.07370380	1.35528978		46.00000000	0.74652174	6.77371714	1.003644
47	0.15943642	9.08571620	1.44859406		47.00000000	0.73063830	6.63837222	1.025011
48	0.16961396	9.08049110	1.54017805		48.00000000	0.71541667	6.49633467	1.046370
49	0.17945957	9.08213810	1.62987660		49.00000000	0.70081633	6.36491066	1.067744
50	0.18955897	9.08743190	1.72260423		50.00000000	0.68680000	6.24124823	1.089281
51	0.19931675	9.08100700	1.80999680		51.00000000	0.67333333	6.11454471	1.110660
52	0.20949951	9.08107850	1.90248150		52.00000000	0.66038462	5.99700453	1.132007
53	0.21937861	9.08472630	1.99299463		53.00000000	0.64792453	5.88621700	1.153390
54	0.22956359	9.07666590	2.08367201		54.00000000	0.63592593	5.77208717	1.174866
55	0.23935561	9.08203980	2.17383718		55.00000000	0.62436364	5.67049540	1.196245
56	0.24951604	9.08997060	2.26809347		56.00000000	0.61321429	5.57409983	1.217597
57	0.25975162	9.08664230	2.36027006		57.00000000	0.60245614	5.47430345	1.238965
58	0.26956373	9.07592010	2.44653888		58.00000000	0.59206897	5.37357062	1.260446
59	0.27955896	9.08469680	2.53970839		59.00000000	0.58203390	5.28760149	1.281839
60	0.28937927	9.06920430	2.62443972		60.00000000	0.57233333	5.19060793	1.303189
61	0.29963121	9.07693290	2.71973239		61.00000000	0.56295082	5.10986682	1.324574
62	0.30936220	9.08367350	2.81014522		62.00000000	0.55387097	5.03118303	1.346060
63	0.31953380	9.07717320	2.90046365		63.00000000	0.54507937	4.94777980	1.367435
64	0.32929456	9.08799080	2.99262593		64.00000000	0.53656250	4.87627506	1.388782
65	0.33951750	9.06831840	3.07885279		65.00000000	0.52830769	4.79086237	1.410156
66	0.34942713	9.08316610	3.17390466		66.00000000	0.52030303	4.72599885	1.431636
67	0.35951313	9.08652400	3.26672468		67.00000000	0.51253731	4.65718260	1.453022
68	0.36963633	9.07432940	3.35420182		68.00000000	0.50500000	4.58253635	1.474380
69	0.37948567	9.08892250	3.44911584		69.00000000	0.49768116	4.52338549	1.495741
70	0.38957688	9.06475350	3.53141839		70.00000000	0.49057143	4.44690907	1.517224
71	0.39941877	9.07664590	3.62538274		71.00000000	0.48366197	4.39002845	1.538610
72	0.40959480	9.06208130	3.71178138		72.00000000	0.47694444	4.32210933	1.559981
73	0.41931242	9.06813620	3.80238213		73.00000000	0.47041096	4.26575065	1.581343
74	0.42952418	9.05763720	3.89047419		74.00000000	0.46405405	4.20323326	1.602817
75	0.43924403	9.06928250	3.98362819		75.00000000	0.45786667	4.15252215	1.624194
76	0.44949973	9.06070140	4.07278283		76.00000000	0.45184211	4.09400640	1.645579
77	0.45964226	9.04759030	4.15865485		77.00000000	0.44597403	4.03499027	1.667063
78	0.46952286	9.04290580	4.24585099		78.00000000	0.44025641	3.98119725	1.688491
79	0.47965723	9.02838130	4.33052837		79.00000000	0.43468354	3.92448878	1.709849
80	0.48949316	9.02470020	4.41752902		80.00000000	0.42925000	3.87385256	1.731224
81	0.49956578	9.00169750	4.49694003		81.00000000	0.42395062	3.81627521	1.752706
82	0.50944114	8.99175070	4.58076773		82.00000000	0.41878049	3.76556974	1.774081
83	0.51946908	8.95494840	4.65181881		83.00000000	0.41373494	3.70497504	1.795428
84	0.52938539	8.91730690	4.72069199		84.00000000	0.40880952	3.64547999	1.816806
85	0.53945208	8.87543110	4.78786977		85.00000000	0.40400000	3.58567416	1.838288
86	0.54962516	8.77787110	4.82453881		86.00000000	0.39930233	3.50502434	1.859664
87	0.55940527	8.68834500	4.86030598		87.00000000	0.39471264	3.42939962	1.881033
88	0.56962746	8.54072190	4.86502972		88.00000000	0.39022727	3.33282261	1.902409
89	0.57938153	8.35554030	4.84104572		89.00000000	0.38584270	3.22392420	1.923884
90	0.58955681	8.08356090	4.76571838		90.00000000	0.38155556	3.08432757	1.945264
91	0.59941214	7.73122020	4.63418724		91.00000000	0.37736264	2.91747364	1.966619
92	0.60943860	7.24317410	4.41426988		92.00000000	0.37326087	2.70359346	1.988095
93	0.61922169	6.61421630	4.09566620		93.00000000	0.36924731	2.44228159	2.009607
94	0.62932777	5.77161360	3.63223672		94.00000000	0.36531915	2.10848097	2.030983
95	0.63946658	4.69949630	3.00517083		95.00000000	0.36147368	1.69874424	2.052338
96	0.64921916	3.37204240	2.18919453		96.00000000	0.35770833	1.20620767	2.073739
97	0.65936995	1.69820560	1.11974574		97.00000000	0.35402062	0.60119980	2.095251
98	0.66908234	-0.27741471	-0.18561328		98.00000000	0.35040816	-0.09720838	2.116637
99	0.67917573	-2.70800470	-1.83921107		99.00000000	0.34686869	-0.93932203	2.138012
100	0.68882340	-5.48602390	-3.77890164		100.00000000	0.34340000	-1.88390061	2.159371
101	0.69912374	-8.85853390	-6.19321135		101.00000000	0.34000000	-3.01190153	2.180845
