# Supplementary material for: Study on the Electrical Injection Regeneration of Industrialized B-Doped Czochralski Silicon PERC Solar Cells
Source: Hindawi journal article supplement (doi:10.1155/2019/5357370), 2019-06-20
Supplement: f1 [file 5357370.f1.zip › section3.3/IVRawData_3-12-9h.csv]

07:31 04/04/2018
Test Lot:	JK-PERC
Recipe:	Recipe_YJX-LID
Cell Name:	3-12-9h
Test Order:	2
Test Condition:	Light
1	-0.29990506	9.08271310	-2.72395162		1.00000000	34.34000000	311.90036785	0.000000
2	-0.29011434	9.09933850	-2.63984858		2.00000000	17.17000000	156.23564205	0.061800
3	-0.27995077	9.10290150	-2.54836428		3.00000000	11.44666667	104.19787917	0.083207
4	-0.27014738	9.10238270	-2.45898484		4.00000000	8.58500000	78.14395548	0.104691
5	-0.25998229	9.10004810	-2.36585134		5.00000000	6.86800000	62.49913035	0.126058
6	-0.24979489	9.10266780	-2.27379990		6.00000000	5.72333333	52.09760204	0.147447
7	-0.23998259	9.09769440	-2.18328827		7.00000000	4.90571429	44.63068939	0.168810
8	-0.22982420	9.08541490	-2.08804821		8.00000000	4.29250000	38.99914346	0.190280
9	-0.22000445	9.10255430	-2.00260245		9.00000000	3.81555556	34.73130163	0.211646
10	-0.20987062	9.09582230	-1.90894587		10.00000000	3.43400000	31.23505378	0.233038
11	-0.20003971	9.10355760	-1.82107302		11.00000000	3.12181818	28.41965163	0.254514
12	-0.18992971	9.09073350	-1.72660038		12.00000000	2.86166667	26.01464903	0.275903
13	-0.18013676	9.10287860	-1.63976306		13.00000000	2.64153846	24.04560393	0.297270
14	-0.16998655	9.09891130	-1.54669254		14.00000000	2.45285714	22.31832957	0.318644
15	-0.16015042	9.10366630	-1.45795598		15.00000000	2.28933333	20.84132672	0.340137
16	-0.15000843	9.10134120	-1.36527790		16.00000000	2.14625000	19.53375355	0.361510
17	-0.13988426	9.09813210	-1.27268548		17.00000000	2.02000000	18.37822684	0.382850
18	-0.13007346	9.09750270	-1.18334365		18.00000000	1.90777778	17.35601348	0.404230
19	-0.11991581	9.10575200	-1.09192363		19.00000000	1.80736842	16.45744861	0.425720
20	-0.11011467	9.10239410	-1.00230712		20.00000000	1.71700000	15.62881067	0.447106
21	-0.09991535	9.08957580	-0.90818813		21.00000000	1.63523810	14.86362062	0.468469
22	-0.09010007	9.11769010	-0.82150447		22.00000000	1.56090909	14.23188537	0.489836
23	-0.07994243	9.07807160	-0.72572309		23.00000000	1.49304348	13.55395560	0.511307
24	-0.07011077	9.09331510	-0.63753931		24.00000000	1.43083333	13.01101836	0.532692
25	-0.06001192	9.10538010	-0.54643137		25.00000000	1.37360000	12.50715011	0.554062
26	-0.04982377	9.09426020	-0.45311031		26.00000000	1.32076923	12.01141905	0.575429
27	-0.04003082	9.09587190	-0.36411517		27.00000000	1.27185185	11.56860152	0.596909
28	-0.02987466	9.10429190	-0.27198764		28.00000000	1.22642857	11.16576371	0.618297
29	-0.02007724	9.09799000	-0.18266255		29.00000000	1.18413793	10.77327506	0.639666
30	-0.00992258	9.10519500	-0.09034700		30.00000000	1.14466667	10.42241321	0.661043
31	-0.00066028	9.07836060	-0.00599425		31.00000000	1.10774194	10.05648074	0.682633
32	0.00950162	9.10049820	0.08646948		32.00000000	1.07312500	9.76597213	0.704033
33	0.01929132	9.09465410	0.17544787		33.00000000	1.04060606	9.46395218	0.725392
34	0.02945314	9.09138490	0.26776980		34.00000000	1.01000000	9.18229875	0.746755
35	0.03926740	9.10445880	0.35750838		35.00000000	0.98114286	8.93277472	0.768240
36	0.04944409	9.09511090	0.44969952		36.00000000	0.95388889	8.67572523	0.789622
37	0.05925463	9.09106730	0.53868784		37.00000000	0.92810811	8.43749327	0.811007
38	0.06940083	9.08985900	0.63084371		38.00000000	0.90368421	8.21436205	0.832358
39	0.07956487	9.09978770	0.72402342		39.00000000	0.88051282	8.01247973	0.853832
40	0.08938955	9.09556010	0.81304801		40.00000000	0.85850000	7.80853835	0.875207
41	0.09951937	9.09889790	0.90551654		41.00000000	0.83756098	7.62088180	0.896590
42	0.10933734	9.09035680	0.99391543		42.00000000	0.81761905	7.43244887	0.918075
43	0.11949618	9.09016610	1.08624012		43.00000000	0.79860465	7.25944893	0.939459
44	0.12927769	9.09142970	1.17531903		44.00000000	0.78045455	7.09544763	0.960803
45	0.13944100	9.09238620	1.26785142		45.00000000	0.76311111	6.93850094	0.982171
46	0.14925750	9.09977050	1.35820900		46.00000000	0.74652174	6.79317650	1.003658
47	0.15945205	9.08778000	1.44906515		47.00000000	0.73063830	6.63988011	1.025047
48	0.16957666	9.10037990	1.54321203		48.00000000	0.71541667	6.51056345	1.046408
49	0.17939612	9.09586050	1.63176208		49.00000000	0.70081633	6.37452754	1.067797
50	0.18953338	9.08863070	1.72259890		50.00000000	0.68680000	6.24207156	1.089290
51	0.19932607	9.09097390	1.81206810		51.00000000	0.67333333	6.12125576	1.110660
52	0.20943281	9.09572890	1.90494406		52.00000000	0.66038462	6.00667943	1.132022
53	0.21929842	9.08894630	1.99319156		53.00000000	0.64792453	5.88895124	1.153390
54	0.22945651	9.09197900	2.08621377		54.00000000	0.63592593	5.78182516	1.174872
55	0.23926854	9.08767320	2.17439430		55.00000000	0.62436364	5.67401269	1.196254
56	0.24941845	9.10711380	2.27148221		56.00000000	0.61321429	5.58461228	1.217595
57	0.25953859	9.09543510	2.36061640		57.00000000	0.60245614	5.47960073	1.238975
58	0.26938412	9.08505250	2.44736887		58.00000000	0.59206897	5.37897764	1.260438
59	0.27951095	9.10135940	2.54392961		59.00000000	0.58203390	5.29729969	1.281811
60	0.28932893	9.08278940	2.62791374		60.00000000	0.57233333	5.19838313	1.303181
61	0.29946840	9.10052200	2.72531876		61.00000000	0.56295082	5.12314632	1.324546
62	0.30930796	9.08982090	2.81155396		62.00000000	0.55387097	5.03458790	1.346021
63	0.31947798	9.09326550	2.90509809		63.00000000	0.54507937	4.95655139	1.367408
64	0.32928404	9.08106230	2.99024888		64.00000000	0.53656250	4.87255749	1.388763
65	0.33943173	9.09208580	3.08614241		65.00000000	0.52830769	4.80341887	1.410129
66	0.34923556	9.08805850	3.17387320		66.00000000	0.52030303	4.72854438	1.431606
67	0.35937655	9.09111120	3.26713218		67.00000000	0.51253731	4.65953371	1.452974
68	0.36957407	9.08177660	3.35638914		68.00000000	0.50500000	4.58629718	1.474348
69	0.37937421	9.09290700	3.44961441		69.00000000	0.49768116	4.52536850	1.495699
70	0.38951743	9.08646110	3.53933498		70.00000000	0.49057143	4.45755820	1.517169
71	0.39934507	9.08030990	3.62617699		71.00000000	0.48366197	4.39180059	1.538556
72	0.40950689	9.07937150	3.71806519		72.00000000	0.47694444	4.33035580	1.559934
73	0.41931295	9.07853030	3.80674532		73.00000000	0.47041096	4.27064014	1.581413
74	0.42945096	9.08297350	3.90069169		74.00000000	0.46405405	4.21499068	1.602799
75	0.43928978	9.06920810	3.98401043		75.00000000	0.45786667	4.15248808	1.624146
76	0.44942257	9.07272150	4.07748581		76.00000000	0.45184211	4.09943758	1.645515
77	0.45956132	9.06057360	4.16388916		77.00000000	0.44597403	4.04078049	1.667005
78	0.46942171	9.05102350	4.24874693		78.00000000	0.44025641	3.98477112	1.688389
79	0.47956195	9.03977870	4.33513390		79.00000000	0.43468354	3.92944305	1.709725
80	0.48938289	9.03462030	4.42138859		80.00000000	0.42925000	3.87811076	1.731111
81	0.49951497	9.02149390	4.50637125		81.00000000	0.42395062	3.82466791	1.752595
82	0.50931579	8.99796580	4.58280606		82.00000000	0.41878049	3.76817251	1.773971
83	0.51948953	8.97083470	4.66025470		83.00000000	0.41373494	3.71154775	1.795345
84	0.52926135	8.92349820	4.72286270		84.00000000	0.40880952	3.64801105	1.816726
85	0.53936958	8.86868950	4.78350133		85.00000000	0.40400000	3.58295056	1.838202
86	0.54953963	8.79730510	4.83446779		86.00000000	0.39930233	3.51278439	1.859583
87	0.55936205	8.69571590	4.86405347		87.00000000	0.39471264	3.43230901	1.880924
88	0.56942338	8.55149080	4.86941880		88.00000000	0.39022727	3.33702493	1.902301
89	0.57929868	8.35562800	4.84040427		89.00000000	0.38584270	3.22395804	1.923787
90	0.58940542	8.08725640	4.76667276		90.00000000	0.38155556	3.08573761	1.945158
91	0.59921151	7.72433420	4.62850996		91.00000000	0.37736264	2.91487513	1.966513
92	0.60932791	7.23810050	4.41037665		92.00000000	0.37326087	2.70169969	1.987985
93	0.61911762	6.61041830	4.09262645		93.00000000	0.36924731	2.44087919	2.009479
94	0.62923402	5.74487540	3.61487104		94.00000000	0.36531915	2.09871299	2.030873
95	0.63936090	4.67958450	2.99194336		95.00000000	0.36147368	1.69154665	2.052298
96	0.64918482	3.36123370	2.18206189		96.00000000	0.35770833	1.20234130	2.073677
97	0.65926701	1.68033500	1.10778943		97.00000000	0.35402062	0.59487324	2.095167
98	0.66895473	-0.27229133	-0.18215057		98.00000000	0.35040816	-0.09541310	2.116532
99	0.67906815	-2.67609550	-1.81725122		99.00000000	0.34686869	-0.92825373	2.137918
100	0.68880427	-5.41671510	-3.73105649		100.00000000	0.34340000	-1.86009997	2.159262
101	0.69904798	-8.71281530	-6.09067594		101.00000000	0.34000000	-2.96235720	2.180726
07:31 04/04/2018
Test Lot:	JK-PERC
Recipe:	Recipe_YJX-LID
Cell Name:	3-12-9h
Test Order:	3
Test Condition:	Light
1	-0.29989570	9.09538840	-2.72766787		1.00000000	34.34000000	312.33563766	0.000000
2	-0.29007578	9.09359070	-2.63783042		2.00000000	17.17000000	156.13695232	0.061814
3	-0.27995440	9.10602570	-2.54927196		3.00000000	11.44666667	104.23364085	0.083310
4	-0.27011439	9.09494110	-2.45667447		4.00000000	8.58500000	78.08006934	0.104699
5	-0.25998485	9.09104540	-2.36353407		5.00000000	6.86800000	62.43729981	0.126197
6	-0.24982107	9.10523800	-2.27468030		6.00000000	5.72333333	52.11231215	0.147586
7	-0.24002421	9.08946900	-2.18169262		7.00000000	4.90571429	44.59033792	0.168978
8	-0.22989392	9.10525990	-2.09324389		8.00000000	4.29250000	39.08432812	0.190487
9	-0.22004721	9.08244610	-1.99856692		9.00000000	3.81555556	34.65457767	0.211878
10	-0.20986779	9.10628600	-1.91111612		10.00000000	3.43400000	31.27098612	0.233224
11	-0.20006871	9.10544010	-1.82171365		11.00000000	3.12181818	28.42552846	0.254617
12	-0.18996224	9.10241220	-1.72911461		12.00000000	2.86166667	26.04806958	0.276103
13	-0.18011254	9.08913140	-1.63706654		13.00000000	2.64153846	24.00929018	0.297485
14	-0.16998076	9.11183830	-1.54883720		14.00000000	2.45285714	22.35003766	0.318850
15	-0.16021144	9.08510300	-1.45553743		15.00000000	2.28933333	20.79882913	0.340246
16	-0.15004766	9.09346870	-1.36445370		16.00000000	2.14625000	19.51685720	0.361738
17	-0.13990100	9.09824660	-1.27285380		17.00000000	2.02000000	18.37845813	0.383150
18	-0.13006917	9.09198670	-1.18258716		18.00000000	1.90777778	17.34549018	0.404512
19	-0.11992101	9.11215400	-1.09273871		19.00000000	1.80736842	16.46901939	0.425941
20	-0.11011225	9.08984570	-1.00090336		20.00000000	1.71700000	15.60726507	0.447427
21	-0.09996484	9.09902950	-0.90958305		21.00000000	1.63523810	14.87907967	0.468871
22	-0.09009208	9.09812160	-0.81966868		22.00000000	1.56090909	14.20134072	0.490271
23	-0.07994764	9.09800820	-0.72736431		23.00000000	1.49304348	13.58372181	0.511659
24	-0.07011507	9.09484770	-0.63768586		24.00000000	1.43083333	13.01321125	0.533152
25	-0.06002497	9.09704690	-0.54604993		25.00000000	1.37360000	12.49570362	0.554551
26	-0.04979718	9.09169010	-0.45274054		26.00000000	1.32076923	12.00802454	0.575911
27	-0.04000107	9.10046290	-0.36402824		27.00000000	1.27185185	11.57444059	0.597292
28	-0.02988716	9.08892150	-0.27164201		28.00000000	1.22642857	11.14691301	0.618790
29	-0.01999578	9.10235400	-0.18200864		29.00000000	1.18413793	10.77844263	0.640168
30	-0.00992875	9.09039690	-0.09025630		30.00000000	1.14466667	10.40547432	0.661585
31	-0.00064396	9.09788510	-0.00585865		31.00000000	1.10774194	10.07810885	0.683078
32	0.00950324	9.08545020	0.08634123		32.00000000	1.07312500	9.74982375	0.704580
33	0.01933182	9.09901430	0.17590051		33.00000000	1.04060606	9.46848943	0.725963
34	0.02943056	9.09604740	0.26770178		34.00000000	1.01000000	9.18700787	0.747359
35	0.03929486	9.09228230	0.35727997		35.00000000	0.98114286	8.92082783	0.768734
36	0.04942412	9.08562660	0.44904909		36.00000000	0.95388889	8.66667826	0.790215
37	0.05928098	9.10907650	0.53999495		37.00000000	0.92810811	8.45420776	0.811593
38	0.06940428	9.09517290	0.63124394		38.00000000	0.90368421	8.21916414	0.832991
39	0.07952683	9.08653640	0.72262347		39.00000000	0.88051282	8.00081179	0.854500
40	0.08932341	9.09674170	0.81255198		40.00000000	0.85850000	7.80955275	0.875888
41	0.09951890	9.09497070	0.90512151		41.00000000	0.83756098	7.61759253	0.897244
42	0.10931250	9.09898280	0.99463256		42.00000000	0.81761905	7.43950165	0.918638
43	0.11944697	9.09506420	1.08637786		43.00000000	0.79860465	7.26336057	0.940133
44	0.12930755	9.09111210	1.17554943		44.00000000	0.78045455	7.09519976	0.961526
45	0.13947029	9.09412670	1.26836049		45.00000000	0.76311111	6.93982913	0.982902
46	0.14926092	9.08992580	1.35677069		46.00000000	0.74652174	6.78582722	1.004284
47	0.15940505	9.10707000	1.45171295		47.00000000	0.73063830	6.65397412	1.025771
48	0.16955812	9.09101870	1.54145604		48.00000000	0.71541667	6.50386629	1.047164
49	0.17938076	9.09494110	1.63145745		49.00000000	0.70081633	6.37388321	1.068515
50	0.18950853	9.09656330	1.72387634		50.00000000	0.68680000	6.24751967	1.089913
51	0.19929914	9.09811210	1.81324592		51.00000000	0.67333333	6.12606215	1.111401
52	0.20945370	9.08302970	1.90247418		52.00000000	0.66038462	5.99829307	1.132778
53	0.21928525	9.10109040	1.99573488		53.00000000	0.64792453	5.89681970	1.154153
54	0.22941154	9.09108070	2.08559882		54.00000000	0.63592593	5.78125391	1.175545
55	0.23925127	9.09349250	2.17562963		55.00000000	0.62436364	5.67764604	1.197038
56	0.24939765	9.09136100	2.26736407		56.00000000	0.61321429	5.57495244	1.218435
57	0.25955519	9.09668830	2.36109266		57.00000000	0.60245614	5.48035572	1.239786
58	0.26938450	9.09402940	2.44979056		58.00000000	0.59206897	5.38429258	1.261163
59	0.27953312	9.09537320	2.54245805		59.00000000	0.58203390	5.29381552	1.282659
60	0.28934085	9.09562490	2.63173584		60.00000000	0.57233333	5.20572932	1.304042
61	0.29950285	9.08399110	2.72068122		61.00000000	0.56295082	5.11384024	1.325479
62	0.30932921	9.10230920	2.81561011		62.00000000	0.55387097	5.04150481	1.346860
63	0.31947485	9.08403110	2.90211947		63.00000000	0.54507937	4.95151790	1.368349
64	0.32929745	9.08695700	2.99231177		64.00000000	0.53656250	4.87572037	1.389752
65	0.33942670	9.08473590	3.08360193		65.00000000	0.52830769	4.79953586	1.411148
66	0.34923521	9.08334350	3.17222337		66.00000000	0.52030303	4.72609115	1.432510
67	0.35938230	9.09724040	3.26938718		67.00000000	0.51253731	4.66267515	1.453986
68	0.36955249	9.06976220	3.35175320		68.00000000	0.50500000	4.58022991	1.475376
69	0.37938109	9.09108260	3.44898483		69.00000000	0.49768116	4.52446053	1.496769
70	0.38952744	9.08487420	3.53880779		70.00000000	0.49057143	4.45677971	1.518278
71	0.39933667	9.07833580	3.62531239		71.00000000	0.48366197	4.39084579	1.539665
72	0.40947634	9.07968040	3.71791430		72.00000000	0.47694444	4.33050312	1.561012
73	0.41928336	9.07284360	3.80409235		73.00000000	0.47041096	4.26796506	1.582416
74	0.42944908	9.08128640	3.89995009		74.00000000	0.46405405	4.21420777	1.603914
75	0.43926722	9.07787800	3.98761423		75.00000000	0.45786667	4.15645774	1.625288
76	0.44944561	9.06876280	4.07591563		76.00000000	0.45184211	4.09764888	1.646649
77	0.45957264	9.04859260	4.15848559		77.00000000	0.44597403	4.03543727	1.668033
78	0.46942651	9.05787370	4.25200604		78.00000000	0.44025641	3.98778696	1.689519
79	0.47955206	9.04432390	4.33722416		79.00000000	0.43468354	3.93141877	1.710906
80	0.48937690	9.04365440	4.42575555		80.00000000	0.42925000	3.88198865	1.732248
81	0.49950022	9.00984670	4.50042041		81.00000000	0.42395062	3.81973007	1.753634
82	0.50933325	8.99563120	4.58177407		82.00000000	0.41878049	3.76719482	1.775128
83	0.51948333	8.97551440	4.66263011		83.00000000	0.41373494	3.71348391	1.796520
84	0.52924716	8.92995550	4.72615359		84.00000000	0.40880952	3.65065086	1.817877
85	0.53942406	8.86915020	4.78423301		85.00000000	0.40400000	3.58313668	1.839265
86	0.54952353	8.80660340	4.83943579		86.00000000	0.39930233	3.51649722	1.860752
87	0.55936033	8.70288940	4.86805109		87.00000000	0.39471264	3.43514048	1.882163
88	0.56952155	8.56354810	4.87712519		88.00000000	0.39022727	3.34173002	1.903519
89	0.57930845	8.35756870	4.84161017		89.00000000	0.38584270	3.22470684	1.924899
90	0.58943701	8.10173800	4.77546422		90.00000000	0.38155556	3.09126314	1.946387
91	0.59923428	7.74236010	4.63948758		91.00000000	0.37736264	2.92167743	1.967772
92	0.60937321	7.24861240	4.41711021		92.00000000	0.37326087	2.70562337	1.989289
93	0.61916161	6.63064000	4.10543774		93.00000000	0.36924731	2.44834600	2.010680
94	0.62926334	5.78801390	3.64218496		94.00000000	0.36531915	2.11447231	2.032175
95	0.63936508	4.71644310	3.01552902		95.00000000	0.36147368	1.70487006	2.053565
96	0.64915490	3.38821150	2.19947410		96.00000000	0.35770833	1.21199149	2.074960
97	0.65925592	1.70723610	1.12550551		97.00000000	0.35402062	0.60439678	2.096391
98	0.66898102	-0.29647887	-0.19833874		98.00000000	0.35040816	-0.10388862	2.117892
99	0.67909390	-2.72068480	-1.84760045		99.00000000	0.34686869	-0.94372036	2.139277
100	0.68883467	-5.53506140	-3.81274219		100.00000000	0.34340000	-1.90074008	2.160666
101	0.69906515	-8.90911770	-6.22805370		101.00000000	0.34000000	-3.02910002	2.182171
07:32 04/04/2018
Test Lot:	JK-PERC
Recipe:	Recipe_YJX-LID
Cell Name:	3-12-9h
Test Order:	4
Test Condition:	Light
1	-0.29992023	9.09303860	-2.72718623		1.00000000	34.34000000	312.25494552	0.000000
2	-0.29007226	9.09035490	-2.63685979		2.00000000	17.17000000	156.08139363	0.061789
3	-0.27996451	9.10975930	-2.55040930		3.00000000	11.44666667	104.27637812	0.083202
4	-0.27013886	9.09494590	-2.45689832		4.00000000	8.58500000	78.08011055	0.104634
5	-0.25996265	9.09441180	-2.36420739		5.00000000	6.86800000	62.46042024	0.126122
6	-0.24982513	9.09390450	-2.27188587		6.00000000	5.72333333	52.04744676	0.147486
7	-0.24002552	9.09454060	-2.18292184		7.00000000	4.90571429	44.61521774	0.168867
8	-0.22988728	9.08972260	-2.08961160		8.00000000	4.29250000	39.01763426	0.190231
9	-0.22005045	9.09815690	-2.00205352		9.00000000	3.81555556	34.71452311	0.211749
10	-0.20990849	9.09127140	-1.90833505		10.00000000	3.43400000	31.21942599	0.233140
11	-0.20006570	9.10457420	-1.82151301		11.00000000	3.12181818	28.42282528	0.254514
12	-0.18990289	9.09190850	-1.72657970		12.00000000	2.86166667	26.01801149	0.275884
13	-0.18011741	9.09652520	-1.63844256		13.00000000	2.64153846	24.02882118	0.297370
14	-0.17000149	9.09647850	-1.54641490		14.00000000	2.45285714	22.31236226	0.318739
15	-0.16016020	9.09114740	-1.45603999		15.00000000	2.28933333	20.81266678	0.340121
16	-0.14998995	9.09196190	-1.36370291		16.00000000	2.14625000	19.51362323	0.361465
17	-0.13983384	9.09235760	-1.27141928		17.00000000	2.02000000	18.36656235	0.382940
18	-0.13005431	9.09547710	-1.18290600		18.00000000	1.90777778	17.35214909	0.404333
19	-0.11986918	9.09149840	-1.08979046		19.00000000	1.80736842	16.43168711	0.425723
20	-0.11005766	9.10004330	-1.00152947		20.00000000	1.71700000	15.62477435	0.447210
21	-0.09993652	9.09908200	-0.90933062		21.00000000	1.63523810	14.87916552	0.468605
22	-0.09008407	9.08983900	-0.81884967		22.00000000	1.56090909	14.18841233	0.489960
23	-0.07995028	9.09935860	-0.72749627		23.00000000	1.49304348	13.58573801	0.511341
24	-0.07009262	9.08268930	-0.63662947		24.00000000	1.43083333	12.99581461	0.532834
25	-0.05995958	9.09653000	-0.54542411		25.00000000	1.37360000	12.49499361	0.554213
26	-0.04980868	9.08731750	-0.45262726		26.00000000	1.32076923	12.00224934	0.575560
27	-0.04003213	9.10546680	-0.36451126		27.00000000	1.27185185	11.58080481	0.596949
28	-0.02988719	9.08640480	-0.27156706		28.00000000	1.22642857	11.14382646	0.618427
29	-0.02005780	9.09909340	-0.18250780		29.00000000	1.18413793	10.77458163	0.639810
30	-0.00991657	9.09618280	-0.09020298		30.00000000	1.14466667	10.41209725	0.661165
31	-0.00064985	9.08755110	-0.00590552		31.00000000	1.10774194	10.06666144	0.682654
32	0.00945991	9.09515290	0.08603936		32.00000000	1.07312500	9.76023596	0.704132
33	0.01929572	9.08664320	0.17533328		33.00000000	1.04060606	9.45561598	0.725523
34	0.02944112	9.09439850	0.26774926		34.00000000	1.01000000	9.18534249	0.746872
35	0.03928809	9.10556030	0.35774003		35.00000000	0.98114286	8.93385545	0.768251
36	0.04941860	9.09004120	0.44921713		36.00000000	0.95388889	8.67088930	0.789740
37	0.05924324	9.09162810	0.53861753		37.00000000	0.92810811	8.43801376	0.811119
38	0.06941469	9.08748250	0.63080478		38.00000000	0.90368421	8.21221445	0.832478
39	0.07955042	9.09818550	0.72376451		39.00000000	0.88051282	8.01106898	0.853865
40	0.08937059	9.09443860	0.81277537		40.00000000	0.85850000	7.80757554	0.875341
41	0.09951823	9.10181050	0.90579609		41.00000000	0.83756098	7.62332128	0.896732
42	0.10929077	9.08680340	0.99310374		42.00000000	0.81761905	7.42954354	0.918100
43	0.11945330	9.09310050	1.08620086		43.00000000	0.79860465	7.26179235	0.939467
44	0.12933002	9.09890650	1.17676176		44.00000000	0.78045455	7.10128294	0.960944
45	0.13949032	9.08208560	1.26686303		45.00000000	0.76311111	6.93064043	0.982320
46	0.14928667	9.09763810	1.35815610		46.00000000	0.74652174	6.79158462	1.003704
47	0.15944324	9.09440230	1.45004097		47.00000000	0.73063830	6.64471862	1.025046
48	0.16954325	9.09215550	1.54151359		48.00000000	0.71541667	6.50467958	1.046522
49	0.17940658	9.09644320	1.63196176		49.00000000	0.70081633	6.37493591	1.067914
50	0.18955794	9.09225080	1.72350833		50.00000000	0.68680000	6.24455785	1.089303
51	0.19931559	9.08663180	1.81110738		51.00000000	0.67333333	6.11833208	1.110776
52	0.20947812	9.10073090	1.90640400		52.00000000	0.66038462	6.00998268	1.132161
53	0.21929383	9.08952710	1.99327721		53.00000000	0.64792453	5.88932756	1.153507
54	0.22945635	9.10195060	2.08850036		54.00000000	0.63592593	5.78816636	1.174879
55	0.23924676	9.08811380	2.17430178		55.00000000	0.62436364	5.67428778	1.196374
56	0.24942861	9.09576700	2.26874452		56.00000000	0.61321429	5.57765426	1.217781
57	0.25956061	9.09632970	2.36104889		57.00000000	0.60245614	5.48013968	1.239143
58	0.26938972	9.07639600	2.44508778		58.00000000	0.59206897	5.37385239	1.260523
59	0.27953440	9.09614090	2.54268429		59.00000000	0.58203390	5.29426235	1.282023
60	0.28934786	9.07900140	2.62698963		60.00000000	0.57233333	5.19621513	1.303410
61	0.29946351	9.10246750	2.72585687		61.00000000	0.56295082	5.12424154	1.324762
62	0.30929336	9.08438210	2.80973906		62.00000000	0.55387097	5.03157551	1.346192
63	0.31945363	9.09920880	2.90677528		63.00000000	0.54507937	4.95979096	1.367688
64	0.32928497	9.07973770	2.98982116		64.00000000	0.53656250	4.87184676	1.389070
65	0.33939987	9.09174350	3.08573656		65.00000000	0.52830769	4.80323803	1.410411
66	0.34923342	9.09847930	3.17749304		66.00000000	0.52030303	4.73396635	1.431790
67	0.35937884	9.08322050	3.26431725		67.00000000	0.51253731	4.65548943	1.453282
68	0.36956516	9.08400440	3.35713154		68.00000000	0.50500000	4.58742222	1.474674
69	0.37936747	9.09068010	3.44870831		69.00000000	0.49768116	4.52426021	1.496038
70	0.38951808	9.08835890	3.54008011		70.00000000	0.49057143	4.45848921	1.517427
71	0.39935091	9.08330060	3.62742436		71.00000000	0.48366197	4.39324708	1.538905
72	0.40948442	9.07708550	3.71692509		72.00000000	0.47694444	4.32926550	1.560281
73	0.41931054	9.08000760	3.80734289		73.00000000	0.47041096	4.27133508	1.581634
74	0.42945445	9.07237720	3.89617276		74.00000000	0.46405405	4.21007342	1.603016
75	0.43926942	9.07129960	3.98474451		75.00000000	0.45786667	4.15344571	1.624486
76	0.44943938	9.05696200	4.07055539		76.00000000	0.45184211	4.09231678	1.645864
77	0.45957288	9.05235580	4.16021723		77.00000000	0.44597403	4.03711556	1.667260
78	0.46943548	9.04755400	4.24724285		78.00000000	0.44025641	3.98324365	1.688609
79	0.47956821	9.03688140	4.33380104		79.00000000	0.43468354	3.92818364	1.710107
80	0.48938468	9.03152940	4.41989213		80.00000000	0.42925000	3.87678399	1.731502
81	0.49952635	9.01984210	4.50564880		81.00000000	0.42395062	3.82396763	1.752893
82	0.50932497	8.99544240	4.58160343		82.00000000	0.41878049	3.76711576	1.774361
83	0.51949936	8.96451950	4.65706214		83.00000000	0.41373494	3.70893494	1.795746
84	0.52926153	8.93075560	4.72670537		84.00000000	0.40880952	3.65097794	1.817098
85	0.53939646	8.87597180	4.78766777		85.00000000	0.40400000	3.58589261	1.838479
86	0.54955977	8.79805370	4.83505637		86.00000000	0.39930233	3.51308330	1.859956
87	0.55933380	8.69655900	4.86427939		87.00000000	0.39471264	3.43264179	1.881339
88	0.56950301	8.56333830	4.87684694		88.00000000	0.39022727	3.34164815	1.902691
89	0.57932615	8.36209300	4.84437914		89.00000000	0.38584270	3.22645251	1.924067
90	0.58942169	8.09745600	4.77281620		90.00000000	0.38155556	3.08962932	1.945545
91	0.59923965	7.75873760	4.64934320		91.00000000	0.37736264	2.92785768	1.966946
92	0.60936421	7.24828770	4.41684711		92.00000000	0.37326087	2.70550217	1.988415
93	0.61911589	6.64066650	4.11134215		93.00000000	0.36924731	2.45204825	2.009825
94	0.62922257	5.79656980	3.64733255		94.00000000	0.36531915	2.11759795	2.031330
95	0.63938588	4.69763660	3.00360251		95.00000000	0.36147368	1.69807201	2.052711
96	0.64915693	3.39339660	2.20284692		96.00000000	0.35770833	1.21384624	2.074052
97	0.65923238	1.69407440	1.11678870		97.00000000	0.35402062	0.59973727	2.095440
98	0.66899449	-0.30204579	-0.20206697		98.00000000	0.35040816	-0.10583931	2.116922
99	0.67908257	-2.73565220	-1.85773373		99.00000000	0.34686869	-0.94891209	2.138308
100	0.68876356	-5.56668090	-3.83412695		100.00000000	0.34340000	-1.91159822	2.159661
101	0.69906306	-8.98217300	-6.27910534		101.00000000	0.34000000	-3.05393882	2.181039
