# Supplementary material for: Study on the Electrical Injection Regeneration of Industrialized B-Doped Czochralski Silicon PERC Solar Cells
Source: Hindawi journal article supplement (doi:10.1155/2019/5357370), 2019-06-20
Supplement: f1 [file 5357370.f1.zip › section3.3/IVRawData_3-12-10h.csv]

08:33 04/04/2018
Test Lot:	JK-PERC
Recipe:	Recipe_YJX-LID
Cell Name:	3-12-10h
Test Order:	2
Test Condition:	Light
1	-0.29990977	9.07399370	-2.72137936		1.00000000	34.34000000	311.60094366	0.000000
2	-0.29010430	9.08103660	-2.63444777		2.00000000	17.17000000	155.92139842	0.061784
3	-0.27998999	9.08147050	-2.54272083		3.00000000	11.44666667	103.95256566	0.083217
4	-0.27015623	9.07530400	-2.45174991		4.00000000	8.58500000	77.91148484	0.104586
5	-0.25999129	9.07364850	-2.35906958		5.00000000	6.86800000	62.31781790	0.126115
6	-0.24985835	9.08256240	-2.26935406		6.00000000	5.72333333	51.98253214	0.147497
7	-0.24003352	9.07352350	-2.17794978		7.00000000	4.90571429	44.51211386	0.168893
8	-0.22989240	9.08570000	-2.08873338		8.00000000	4.29250000	39.00036725	0.190304
9	-0.22007948	9.08505250	-1.99943363		9.00000000	3.81555556	34.66452254	0.211783
10	-0.20990859	9.08037570	-1.90604886		10.00000000	3.43400000	31.18201015	0.233147
11	-0.20008229	9.07081130	-1.81490870		11.00000000	3.12181818	28.31742364	0.254501
12	-0.18991883	9.08959200	-1.72628468		12.00000000	2.86166667	26.01138244	0.275873
13	-0.18014611	9.07215500	-1.63431343		13.00000000	2.64153846	23.96444636	0.297366
14	-0.16998860	9.08279900	-1.54397229		14.00000000	2.45285714	22.27880840	0.318747
15	-0.16015559	9.07397560	-1.45324792		15.00000000	2.28933333	20.77335481	0.340128
16	-0.15000182	9.09006400	-1.36352614		16.00000000	2.14625000	19.50954986	0.361492
17	-0.13984582	9.06908890	-1.26827417		17.00000000	2.02000000	18.31955958	0.382971
18	-0.13005894	9.08137420	-1.18111390		18.00000000	1.90777778	17.32524389	0.404354
19	-0.11989996	9.07971000	-1.08865687		19.00000000	1.80736842	16.41038113	0.425737
20	-0.11006174	9.08027270	-0.99939061		20.00000000	1.71700000	15.59082823	0.447084
21	-0.09993401	9.08220670	-0.90762135		21.00000000	1.63523810	14.85157038	0.468561
22	-0.09010622	9.07330130	-0.81756087		22.00000000	1.56090909	14.16259848	0.489925
23	-0.07995393	9.08319280	-0.72623697		23.00000000	1.49304348	13.56160177	0.511308
24	-0.07012464	9.08233550	-0.63689552		24.00000000	1.43083333	12.99530838	0.532791
25	-0.05999096	9.07979200	-0.54470541		25.00000000	1.37360000	12.47200229	0.554155
26	-0.04982900	9.07876400	-0.45238569		26.00000000	1.32076923	11.99095214	0.575519
27	-0.04001832	9.07515530	-0.36317243		27.00000000	1.27185185	11.54225307	0.596899
28	-0.02986677	9.08158780	-0.27123769		28.00000000	1.22642857	11.13791875	0.618393
29	-0.02009033	9.07347970	-0.18228917		29.00000000	1.18413793	10.74425148	0.639789
30	-0.00993655	9.07164380	-0.09014082		30.00000000	1.14466667	10.38400827	0.661147
31	-0.00065056	9.08510210	-0.00591044		31.00000000	1.10774194	10.06394858	0.682638
32	0.00950450	9.06799600	0.08618672		32.00000000	1.07312500	9.73109321	0.704131
33	0.01932755	9.09313960	0.17574808		33.00000000	1.04060606	9.46237618	0.725511
34	0.02943489	9.07011700	0.26697792		34.00000000	1.01000000	9.16081817	0.746861
35	0.03928623	9.09633540	0.35736069		35.00000000	0.98114286	8.92480450	0.768246
36	0.04945162	9.06624320	0.44834044		36.00000000	0.95388889	8.64818865	0.789731
37	0.05926351	9.08182810	0.53822100		37.00000000	0.92810811	8.42891830	0.811120
38	0.06942146	9.08157060	0.63045592		38.00000000	0.90368421	8.20687196	0.832479
39	0.07953997	9.07622530	0.72192269		39.00000000	0.88051282	7.99173274	0.853854
40	0.08939577	9.06656740	0.81051276		40.00000000	0.85850000	7.78364811	0.875327
41	0.09952470	9.08600710	0.90428212		41.00000000	0.83756098	7.61008497	0.896706
42	0.10933361	9.07635880	0.99235107		42.00000000	0.81761905	7.42100384	0.918054
43	0.11950794	9.09342190	1.08673612		43.00000000	0.79860465	7.26204902	0.939431
44	0.12934588	9.07630730	1.17398295		44.00000000	0.78045455	7.08364529	0.960914
45	0.13949043	9.06983850	1.26515567		45.00000000	0.76311111	6.92129454	0.982295
46	0.14929637	9.08354850	1.35614082		46.00000000	0.74652174	6.78106642	1.003670
47	0.15946697	9.08060460	1.44805650		47.00000000	0.73063830	6.63463749	1.025037
48	0.16958325	9.08115010	1.54001095		48.00000000	0.71541667	6.49680613	1.046523
49	0.17939737	9.06834980	1.62683810		49.00000000	0.70081633	6.35524759	1.067920
50	0.18953523	9.08323960	1.72159391		50.00000000	0.68680000	6.23836896	1.089305
51	0.19936126	9.08576970	1.81135050		51.00000000	0.67333333	6.11775160	1.110668
52	0.20947307	9.06516840	1.89890865		52.00000000	0.66038462	5.98649775	1.132148
53	0.21928644	9.08045580	1.99122083		53.00000000	0.64792453	5.88345004	1.153527
54	0.22945185	9.07271390	2.08175099		54.00000000	0.63592593	5.76957399	1.174923
55	0.23928978	9.08182810	2.17318865		55.00000000	0.62436364	5.67036322	1.196428
56	0.24942541	9.07007030	2.26230600		56.00000000	0.61321429	5.56189668	1.217809
57	0.25957146	9.08424280	2.35801017		57.00000000	0.60245614	5.47285786	1.239169
58	0.26937068	9.08157440	2.44630987		58.00000000	0.59206897	5.37691836	1.260551
59	0.27955991	9.08189490	2.53893372		59.00000000	0.58203390	5.28597069	1.282040
60	0.28937179	9.06941800	2.62443372		60.00000000	0.57233333	5.19073024	1.303429
61	0.29950517	9.07554630	2.71817304		61.00000000	0.56295082	5.10908623	1.324783
62	0.30929029	9.08080290	2.80860416		62.00000000	0.55387097	5.02959309	1.346157
63	0.31948024	9.07270240	2.89854914		63.00000000	0.54507937	4.94534286	1.367656
64	0.32925788	9.08431430	2.99108207		64.00000000	0.53656250	4.87430239	1.389029
65	0.33943295	9.06328960	3.07637913		65.00000000	0.52830769	4.78820561	1.410379
66	0.34926793	9.08159920	3.17191135		66.00000000	0.52030303	4.72518358	1.431754
67	0.35937154	9.07008360	3.25952991		67.00000000	0.51253731	4.64875628	1.453226
68	0.36955628	9.07217790	3.35268032		68.00000000	0.50500000	4.58144984	1.474619
69	0.37938827	9.06764510	3.44015819		69.00000000	0.49768116	4.51279613	1.495967
70	0.38949561	9.06806090	3.53196991		70.00000000	0.49057143	4.44853159	1.517334
71	0.39932686	9.07131670	3.62242041		71.00000000	0.48366197	4.38745092	1.538818
72	0.40947366	9.06537720	3.71203318		72.00000000	0.47694444	4.32368129	1.560186
73	0.41931978	9.05980490	3.79895540		73.00000000	0.47041096	4.26183151	1.581539
74	0.42944199	9.06195260	3.89158296		74.00000000	0.46405405	4.20523584	1.602919
75	0.43928590	9.05328750	3.97698155		75.00000000	0.45786667	4.14519857	1.624401
76	0.44943044	9.04973130	4.06722472		76.00000000	0.45184211	4.08904964	1.645781
77	0.45960253	9.04377270	4.15654081		77.00000000	0.44597403	4.03328772	1.667161
78	0.46946132	9.04761310	4.24750439		78.00000000	0.44025641	3.98326966	1.688527
79	0.47960216	9.02969550	4.33066147		79.00000000	0.43468354	3.92506004	1.709999
80	0.48939469	9.00964830	4.40927404		80.00000000	0.42925000	3.86739153	1.731369
81	0.49955338	8.99694440	4.49445398		81.00000000	0.42395062	3.81426013	1.752753
82	0.50937271	8.97696590	4.57262145		82.00000000	0.41878049	3.75937816	1.774106
83	0.51951730	8.95121770	4.65031245		83.00000000	0.41373494	3.70343152	1.795584
84	0.52926517	8.89727310	4.70901676		84.00000000	0.40880952	3.63728998	1.816962
85	0.53941792	8.85757450	4.77793441		85.00000000	0.40400000	3.57846010	1.838345
86	0.54956096	8.76927570	4.81925157		86.00000000	0.39930233	3.50159218	1.859831
87	0.55939442	8.66430850	4.84676583		87.00000000	0.39471264	3.41991211	1.881202
88	0.56951070	8.52675440	4.85607787		88.00000000	0.39022727	3.32737211	1.902560
89	0.57931817	8.32414720	4.82232972		89.00000000	0.38584270	3.21181140	1.923937
90	0.58945078	8.05171390	4.74608904		90.00000000	0.38155556	3.07217617	1.945410
91	0.59927011	7.67971130	4.60222144		91.00000000	0.37736264	2.89803611	1.966813
92	0.60937750	7.20239450	4.38897715		92.00000000	0.37326087	2.68837203	1.988286
93	0.61916554	6.55506610	4.05867104		93.00000000	0.36924731	2.42044054	2.009687
94	0.62927961	5.70205260	3.58818544		94.00000000	0.36531915	2.08306900	2.031191
95	0.63939065	4.62426420	2.95671129		95.00000000	0.36147368	1.67154982	2.052564
96	0.64918840	3.30719850	2.14699490		96.00000000	0.35770833	1.18301246	2.073926
97	0.65928388	1.63446620	1.07757722		97.00000000	0.35402062	0.57863474	2.095308
98	0.66900045	-0.29800385	-0.19936471		98.00000000	0.35040816	-0.10442298	2.116821
99	0.67910856	-2.66677140	-1.81102729		99.00000000	0.34686869	-0.92501949	2.138214
100	0.68881851	-5.36114550	-3.69285626		100.00000000	0.34340000	-1.84101736	2.159561
101	0.69910818	-8.61070540	-6.01981458		101.00000000	0.34000000	-2.92763984	2.180941
08:33 04/04/2018
Test Lot:	JK-PERC
Recipe:	Recipe_YJX-LID
Cell Name:	3-12-10h
Test Order:	3
Test Condition:	Light
1	-0.29994044	9.08678340	-2.72549381		1.00000000	34.34000000	312.04014196	0.000000
2	-0.29014391	9.07363410	-2.63265968		2.00000000	17.17000000	155.79429750	0.061791
3	-0.28001469	9.07264900	-2.54047500		3.00000000	11.44666667	103.85158889	0.083218
4	-0.27018389	9.09146600	-2.45636765		4.00000000	8.58500000	78.05023561	0.104751
5	-0.26004797	9.07893940	-2.36095976		5.00000000	6.86800000	62.35415580	0.126134
6	-0.24987932	9.07535460	-2.26774344		6.00000000	5.72333333	51.94127949	0.147510
7	-0.24004853	9.08164310	-2.18003508		7.00000000	4.90571429	44.55194629	0.168898
8	-0.22993866	9.07893090	-2.08759721		8.00000000	4.29250000	38.97131089	0.190383
9	-0.22008631	9.06867410	-1.99589102		9.00000000	3.81555556	34.60202984	0.211752
10	-0.20994741	9.07954690	-1.90622736		10.00000000	3.43400000	31.17916405	0.233133
11	-0.20009653	9.07504750	-1.81588551		11.00000000	3.12181818	28.33064829	0.254490
12	-0.18997996	9.08656980	-1.72626617		12.00000000	2.86166667	26.00273391	0.275955
13	-0.18014918	9.07826330	-1.63544169		13.00000000	2.64153846	23.98058167	0.297342
14	-0.16998646	9.08614730	-1.54452201		14.00000000	2.45285714	22.28702131	0.318728
15	-0.16019364	9.07711700	-1.45409641		15.00000000	2.28933333	20.78054652	0.340134
16	-0.15004879	9.07970330	-1.36239849		16.00000000	2.14625000	19.48731321	0.361595
17	-0.13988608	9.07696820	-1.26974150		17.00000000	2.02000000	18.33547576	0.382978
18	-0.13006496	9.07856560	-1.18080327		18.00000000	1.90777778	17.31988571	0.404346
19	-0.11991863	9.07357410	-1.08809058		19.00000000	1.80736842	16.39929129	0.425717
20	-0.11009008	9.08250240	-0.99989342		20.00000000	1.71700000	15.59465662	0.447206
21	-0.09991472	9.07641120	-0.90686704		21.00000000	1.63523810	14.84209336	0.468585
22	-0.09013157	9.07089520	-0.81757399		22.00000000	1.56090909	14.15884278	0.489950
23	-0.07997184	9.07528780	-0.72576742		23.00000000	1.49304348	13.54979926	0.511314
24	-0.07017231	9.08205030	-0.63730845		24.00000000	1.43083333	12.99490030	0.532794
25	-0.06003714	9.07357690	-0.54475157		25.00000000	1.37360000	12.46346523	0.554180
26	-0.04989005	9.08707330	-0.45335453		26.00000000	1.32076923	12.00192681	0.575558
27	-0.04005778	9.07632920	-0.36357762		27.00000000	1.27185185	11.54374610	0.596902
28	-0.02989953	9.07844350	-0.27144123		28.00000000	1.22642857	11.13406249	0.618368
29	-0.02010597	9.09056000	-0.18277450		29.00000000	1.18413793	10.76447691	0.639743
30	-0.00994474	9.08374600	-0.09033550		30.00000000	1.14466667	10.39786125	0.661115
31	-0.00066471	9.06509590	-0.00602562		31.00000000	1.10774194	10.04178688	0.682717
32	0.00947399	9.08568860	0.08607768		32.00000000	1.07312500	9.75007958	0.704088
33	0.01926727	9.07187460	0.17479028		33.00000000	1.04060606	9.44024769	0.725448
34	0.02944086	9.08760450	0.26754690		34.00000000	1.01000000	9.17848055	0.746830
35	0.03923415	9.05363660	0.35521174		35.00000000	0.98114286	8.88291088	0.768313
36	0.04942560	9.09677310	0.44961345		36.00000000	0.95388889	8.67731078	0.789687
37	0.05923600	9.07486250	0.53755856		37.00000000	0.92810811	8.42245347	0.811046
38	0.06938652	9.07129100	0.62942531		38.00000000	0.90368421	8.19758245	0.832424
39	0.07950950	9.08428670	0.72228707		39.00000000	0.88051282	7.99883090	0.853893
40	0.08933553	9.07843880	0.81102715		40.00000000	0.85850000	7.79383971	0.875269
41	0.09946149	9.06961540	0.90207744		41.00000000	0.83756098	7.59635592	0.896610
42	0.10931357	9.08388420	0.99299181		42.00000000	0.81761905	7.42715675	0.917990
43	0.11943730	9.06524750	1.08272869		43.00000000	0.79860465	7.23954882	0.939475
44	0.12928194	9.08208370	1.17414940		44.00000000	0.78045455	7.08815351	0.960859
45	0.13938184	9.07674120	1.26513289		45.00000000	0.76311111	6.92656206	0.982220
46	0.14922649	9.06961350	1.35342659		46.00000000	0.74652174	6.77066364	1.003586
47	0.15941198	9.06682110	1.44535990		47.00000000	0.73063830	6.62456674	1.025059
48	0.16956176	9.08122250	1.53982807		48.00000000	0.71541667	6.49685793	1.046454
49	0.17936322	9.07229040	1.62723522		49.00000000	0.70081633	6.35800923	1.067800
50	0.18951821	9.08093830	1.72100317		50.00000000	0.68680000	6.23678842	1.089169
51	0.19929810	9.08049770	1.80972594		51.00000000	0.67333333	6.11420178	1.110652
52	0.20947169	9.07718560	1.90141341		52.00000000	0.66038462	5.99443372	1.132033
53	0.21928880	9.08918290	1.99315601		53.00000000	0.64792453	5.88910454	1.153399
54	0.22943038	9.07239060	2.08148202		54.00000000	0.63592593	5.76936839	1.174758
55	0.23923185	9.08811470	2.17416649		55.00000000	0.62436364	5.67428834	1.196231
56	0.24940544	9.07003880	2.26211702		56.00000000	0.61321429	5.56187736	1.217620
57	0.25954255	9.07751940	2.35600253		57.00000000	0.60245614	5.46880730	1.239008
58	0.26938125	9.07420160	2.44441977		58.00000000	0.59206897	5.37255315	1.260346
59	0.27951986	9.08274940	2.53880884		59.00000000	0.58203390	5.28646804	1.281809
60	0.28934291	9.06352520	2.62246676		60.00000000	0.57233333	5.18735759	1.303188
61	0.29949045	9.07901290	2.71907766		61.00000000	0.56295082	5.11103775	1.324565
62	0.30927852	9.07540130	2.80682668		62.00000000	0.55387097	5.02660130	1.346044
63	0.31940076	9.08548160	2.90190973		63.00000000	0.54507937	4.95230854	1.367412
64	0.32926774	9.06198980	2.98382090		64.00000000	0.53656250	4.86232390	1.388744
65	0.33940560	9.07552340	3.08028346		65.00000000	0.52830769	4.79466882	1.410127
66	0.34919292	9.07154940	3.16772082		66.00000000	0.52030303	4.71995464	1.431610
67	0.35937098	9.06724360	3.25850422		67.00000000	0.51253731	4.64730067	1.452993
68	0.36952671	9.07279110	3.35263865		68.00000000	0.50500000	4.58175951	1.474339
69	0.37935051	9.06855390	3.44016055		69.00000000	0.49768116	4.51324842	1.495706
70	0.38948539	9.05980680	3.52866238		70.00000000	0.49057143	4.44448236	1.517194
71	0.39934343	9.06205650	3.61887273		71.00000000	0.48366197	4.38297212	1.538575
72	0.40946046	9.06496240	3.71174367		72.00000000	0.47694444	4.32348346	1.559923
73	0.41927311	9.04966450	3.79428098		73.00000000	0.47041096	4.25706136	1.581301
74	0.42943403	9.05993840	3.89064586		74.00000000	0.46405405	4.20430114	1.602779
75	0.43925783	9.05579280	3.97782789		75.00000000	0.45786667	4.14634566	1.624143
76	0.44944558	9.06103710	4.07244307		76.00000000	0.45184211	4.09415808	1.645509
77	0.45955589	9.04731850	4.15774851		77.00000000	0.44597403	4.03486906	1.666884
78	0.46943477	9.04070090	4.24401935		78.00000000	0.44025641	3.98022652	1.688370
79	0.47956371	9.02578260	4.32843779		79.00000000	0.43468354	3.92335917	1.709752
80	0.48938379	9.01518630	4.41188604		80.00000000	0.42925000	3.86976872	1.731100
81	0.49950454	8.99427030	4.49267885		81.00000000	0.42395062	3.81312645	1.752478
82	0.50932240	8.98346900	4.57548199		82.00000000	0.41878049	3.76210153	1.773954
83	0.51947659	8.93766690	4.64290872		83.00000000	0.41373494	3.69782508	1.795345
84	0.52924091	8.90197850	4.71129120		84.00000000	0.40880952	3.63921359	1.816717
85	0.53936458	8.84733680	4.77194010		85.00000000	0.40400000	3.57432407	1.838099
86	0.54954267	8.77333160	4.82132007		86.00000000	0.39930233	3.50321171	1.859570
87	0.55935305	8.66729830	4.84807974		87.00000000	0.39471264	3.42109223	1.880955
88	0.56950802	8.51798530	4.85106094		88.00000000	0.39022727	3.32395017	1.902337
89	0.57930428	8.32551190	4.82300468		89.00000000	0.38584270	3.21233796	1.923684
90	0.58939976	8.04731940	4.74308812		90.00000000	0.38155556	3.07049942	1.945160
91	0.59923548	7.68212510	4.60340192		91.00000000	0.37736264	2.89894699	1.966540
92	0.60933018	7.18880370	4.38035505		92.00000000	0.37326087	2.68329912	1.988013
93	0.61911672	6.54689460	4.05329191		93.00000000	0.36924731	2.41742323	2.009525
94	0.62925088	5.71191310	3.59422634		94.00000000	0.36531915	2.08667123	2.030926
95	0.63934708	4.62208650	2.95511751		95.00000000	0.36147368	1.67076264	2.052290
96	0.64915001	3.30842800	2.14766607		96.00000000	0.35770833	1.18345227	2.073668
97	0.65929013	1.61968210	1.06784042		97.00000000	0.35402062	0.57340086	2.095174
98	0.66894948	-0.30506262	-0.20407148		98.00000000	0.35040816	-0.10689643	2.116569
99	0.67907917	-2.69719860	-1.83161139		99.00000000	0.34686869	-0.93557374	2.137925
100	0.68878609	-5.40416290	-3.72231223		100.00000000	0.34340000	-1.85578954	2.159296
101	0.69905943	-8.66446020	-6.05697261		101.00000000	0.34000000	-2.94591647	2.180783
08:33 04/04/2018
Test Lot:	JK-PERC
Recipe:	Recipe_YJX-LID
Cell Name:	3-12-10h
Test Order:	4
Test Condition:	Light
1	-0.29996777	9.08135130	-2.72411270		1.00000000	34.34000000	311.85360364	0.000000
2	-0.29014799	9.09171580	-2.63794307		2.00000000	17.17000000	156.10476029	0.061739
3	-0.28000820	9.07855320	-2.54206934		3.00000000	11.44666667	103.91917230	0.083207
4	-0.27018917	9.07185360	-2.45111659		4.00000000	8.58500000	77.88186316	0.104657
5	-0.26003742	9.07504840	-2.35985217		5.00000000	6.86800000	62.32743241	0.126018
6	-0.24986935	9.07614330	-2.26785003		6.00000000	5.72333333	51.94579349	0.147396
7	-0.24005552	9.08143140	-2.18004774		7.00000000	4.90571429	44.55090775	0.168920
8	-0.22988296	9.08475590	-2.08843058		8.00000000	4.29250000	38.99631470	0.190315
9	-0.22007509	9.07112980	-1.99632971		9.00000000	3.81555556	34.61139970	0.211672
10	-0.20995240	9.07547860	-1.90541851		10.00000000	3.43400000	31.16519351	0.233055
11	-0.20010285	9.08071900	-1.81707775		11.00000000	3.12181818	28.34835368	0.254536
12	-0.18996528	9.06961250	-1.72291148		12.00000000	2.86166667	25.95420777	0.275903
13	-0.18019462	9.08519360	-1.63710301		13.00000000	2.64153846	23.99888832	0.297259
14	-0.17006002	9.07663060	-1.54357198		14.00000000	2.45285714	22.26367820	0.318635
15	-0.16026555	9.08583450	-1.45614626		15.00000000	2.28933333	20.80050378	0.340107
16	-0.15007736	9.07807730	-1.36241388		16.00000000	2.14625000	19.48382341	0.361489
17	-0.13995318	9.08389000	-1.27131929		17.00000000	2.02000000	18.34945780	0.382832
18	-0.13009320	9.07694440	-1.18084874		18.00000000	1.90777778	17.31679282	0.404209
19	-0.11996903	9.07236100	-1.08840235		19.00000000	1.80736842	16.39709878	0.425692
20	-0.11016860	9.07562730	-0.99984915		20.00000000	1.71700000	15.58285207	0.447066
21	-0.09999009	9.07695770	-0.90760577		21.00000000	1.63523810	14.84298702	0.468435
22	-0.09015989	9.09062390	-0.81960968		22.00000000	1.56090909	14.18963749	0.489818
23	-0.08003794	9.07773490	-0.72656324		23.00000000	1.49304348	13.55345289	0.511289
24	-0.07021668	9.08150670	-0.63767323		24.00000000	1.43083333	12.99412250	0.532685
25	-0.06005454	9.07655330	-0.54508821		25.00000000	1.37360000	12.46755361	0.554028
26	-0.04991026	9.07634160	-0.45300259		26.00000000	1.32076923	11.98775271	0.575398
27	-0.04008230	9.08263680	-0.36405295		27.00000000	1.27185185	11.55176843	0.596894
28	-0.02994249	9.07692240	-0.27178564		28.00000000	1.22642857	11.13219697	0.618268
29	-0.02009220	9.08493800	-0.18253635		29.00000000	1.18413793	10.75781969	0.639612
30	-0.00995015	9.07908540	-0.09033828		30.00000000	1.14466667	10.39252642	0.660991
31	-0.00067666	9.07749650	-0.00614239		31.00000000	1.10774194	10.05552354	0.682586
32	0.00948080	9.07060720	0.08599664		32.00000000	1.07312500	9.73389535	0.703979
33	0.01927351	9.07902340	0.17498463		33.00000000	1.04060606	9.44768677	0.725371
34	0.02943982	9.08045580	0.26732702		34.00000000	1.01000000	9.17126036	0.746724
35	0.03928760	9.07681750	0.35660638		35.00000000	0.98114286	8.90565466	0.768192
36	0.04942415	9.08058740	0.44880027		36.00000000	0.95388889	8.66187143	0.789562
37	0.05923248	9.07473950	0.53751934		37.00000000	0.92810811	8.42233931	0.810944
38	0.06937200	9.07622810	0.62963608		38.00000000	0.90368421	8.20204403	0.832361
39	0.07952566	9.07269670	0.72151223		39.00000000	0.88051282	7.98862576	0.853833
40	0.08930423	9.08433910	0.81126992		40.00000000	0.85850000	7.79890512	0.875198
41	0.09948394	9.07108970	0.90242772		41.00000000	0.83756098	7.59759074	0.896567
42	0.10927814	9.07013130	0.99116708		42.00000000	0.81761905	7.41591212	0.917925
43	0.11946603	9.08880330	1.08580325		43.00000000	0.79860465	7.25836059	0.939413
44	0.12927957	9.08203890	1.17412208		44.00000000	0.78045455	7.08811854	0.960821
45	0.13943920	9.06953910	1.26464928		45.00000000	0.76311111	6.92106606	0.982179
46	0.14923933	9.07217120	1.35392475		46.00000000	0.74652174	6.77257302	1.003556
47	0.15940937	9.07301520	1.44632364		47.00000000	0.73063830	6.62909238	1.025034
48	0.16951317	9.06866650	1.53725841		48.00000000	0.71541667	6.48787516	1.046409
49	0.17935574	9.07595630	1.62782486		49.00000000	0.70081633	6.36057835	1.067800
50	0.18949527	9.07627490	1.71991116		50.00000000	0.68680000	6.23358560	1.089160
51	0.19927233	9.08268360	1.80992752		51.00000000	0.67333333	6.11567362	1.110647
52	0.20939623	9.06596280	1.89837843		52.00000000	0.66038462	5.98702236	1.132036
53	0.21922392	9.08369640	1.99136353		53.00000000	0.64792453	5.88554971	1.153422
54	0.22939767	9.06752490	2.08006908		54.00000000	0.63592593	5.76627417	1.174908
55	0.23922163	9.07346920	2.17057009		55.00000000	0.62436364	5.66514422	1.196305
56	0.24937083	9.08144000	2.26464623		56.00000000	0.61321429	5.56886874	1.217663
57	0.25953194	9.06766320	2.35334822		57.00000000	0.60245614	5.46286937	1.239039
58	0.26936781	9.07058720	2.44332421		58.00000000	0.59206897	5.37041318	1.260531
59	0.27949467	9.08023830	2.53787821		59.00000000	0.58203390	5.28500650	1.281912
60	0.28933278	9.06665710	2.62328110		60.00000000	0.57233333	5.18915008	1.303272
61	0.29946932	9.07178690	2.71672185		61.00000000	0.56295082	5.10696987	1.324650
62	0.30931637	9.07725430	2.80774335		62.00000000	0.55387097	5.02762762	1.346137
63	0.31943578	9.06032180	2.89419096		63.00000000	0.54507937	4.93859445	1.367531
64	0.32925454	9.09190940	2.99355245		64.00000000	0.53656250	4.87837764	1.388885
65	0.33942756	9.06323240	3.07631086		65.00000000	0.52830769	4.78817539	1.410259
66	0.34927085	9.07164000	3.16845941		66.00000000	0.52030303	4.72000178	1.431743
67	0.35935012	9.06726260	3.25832190		67.00000000	0.51253731	4.64731041	1.453125
68	0.36954543	9.06664180	3.35053604		68.00000000	0.50500000	4.57865411	1.474479
69	0.37936494	9.07061390	3.44107290		69.00000000	0.49768116	4.51427364	1.495865
70	0.38951266	9.06734090	3.53184407		70.00000000	0.49057143	4.44817838	1.517358
71	0.39931354	9.05638500	3.61633715		71.00000000	0.48366197	4.38022903	1.538740
72	0.40947241	9.07266810	3.71500727		72.00000000	0.47694444	4.32715865	1.560099
73	0.41930604	9.04217240	3.79143750		73.00000000	0.47041096	4.25353699	1.581479
74	0.42945302	9.06247810	3.89190859		74.00000000	0.46405405	4.20547970	1.602951
75	0.43922934	9.05677510	3.97800135		75.00000000	0.45786667	4.14679543	1.624335
76	0.44940832	9.04831410	4.06638764		76.00000000	0.45184211	4.08840929	1.645693
77	0.45952401	9.03884320	4.15356547		77.00000000	0.44597403	4.03108929	1.667056
78	0.46939039	9.03761480	4.24216954		78.00000000	0.44025641	3.97886785	1.688533
79	0.47955447	9.02975750	4.33026057		79.00000000	0.43468354	3.92508699	1.709911
80	0.48935464	9.02913480	4.41844901		80.00000000	0.42925000	3.87575611	1.731300
81	0.49945396	8.99721910	4.49369671		81.00000000	0.42395062	3.81437659	1.752658
82	0.50928837	8.97824670	4.57251663		82.00000000	0.41878049	3.75991453	1.774133
83	0.51945835	8.93290810	4.64027370		83.00000000	0.41373494	3.69585619	1.795520
84	0.52926373	8.90817170	4.71477218		84.00000000	0.40880952	3.64174543	1.816919
85	0.53935564	8.83791260	4.76677801		85.00000000	0.40400000	3.57051669	1.838398
86	0.54952568	8.77353950	4.82128526		86.00000000	0.39930233	3.50329473	1.859781
87	0.55934817	8.66062640	4.84430553		87.00000000	0.39471264	3.41845874	1.881126
88	0.56944448	8.52165410	4.85260889		88.00000000	0.39022727	3.32538184	1.902511
89	0.57928932	8.32462690	4.82236746		89.00000000	0.38584270	3.21199649	1.923991
90	0.58940428	8.03969570	4.73863106		90.00000000	0.38155556	3.06759056	1.945356
91	0.59921408	7.67484380	4.59887447		91.00000000	0.37736264	2.89619930	1.966722
92	0.60934168	7.17679260	4.37311886		92.00000000	0.37326087	2.67881585	1.988195
93	0.61911207	6.55842160	4.06039797		93.00000000	0.36924731	2.42167955	2.009724
94	0.62924117	5.69228030	3.58181712		94.00000000	0.36531915	2.07949899	2.031117
95	0.63939929	4.60995150	2.94759972		95.00000000	0.36147368	1.66637615	2.052464
96	0.64912951	3.29206490	2.13697648		96.00000000	0.35770833	1.17759905	2.073845
97	0.65929210	1.61948660	1.06771472		97.00000000	0.35402062	0.57333165	2.095346
98	0.66898280	-0.33013666	-0.22085575		98.00000000	0.35040816	-0.11568258	2.116725
99	0.67908734	-2.70897130	-1.83962811		99.00000000	0.34686869	-0.93965732	2.138073
100	0.68878186	-5.42356060	-3.73565016		100.00000000	0.34340000	-1.86245071	2.159458
101	0.69903892	-8.67133050	-6.06159751		101.00000000	0.34000000	-2.94825237	2.180941
