# Supplementary material for: Study on the Electrical Injection Regeneration of Industrialized B-Doped Czochralski Silicon PERC Solar Cells
Source: Hindawi journal article supplement (doi:10.1155/2019/5357370), 2019-06-20
Supplement: f1 [file 5357370.f1.zip › section3.3/IVRawData_3-12-11h.csv]

09:33 04/04/2018
Test Lot:	JK-PERC
Recipe:	Recipe_YJX-LID
Cell Name:	3-12-11h
Test Order:	2
Test Condition:	Light
1	-0.29992482	9.08215520	-2.72396376		1.00000000	34.34000000	311.88120957	0.000000
2	-0.29014468	9.07864860	-2.63412159		2.00000000	17.17000000	155.88039646	0.061789
3	-0.28001922	9.07711980	-2.54176801		3.00000000	11.44666667	103.90276464	0.083240
4	-0.27020711	9.08886240	-2.45587524		4.00000000	8.58500000	78.02788370	0.104632
5	-0.26003999	9.08726220	-2.36305157		5.00000000	6.86800000	62.41131679	0.126117
6	-0.24986541	9.07983020	-2.26873550		6.00000000	5.72333333	51.96689484	0.147569
7	-0.24007785	9.08454130	-2.18099714		7.00000000	4.90571429	44.56616403	0.168972
8	-0.22991668	9.07150750	-2.08569089		8.00000000	4.29250000	38.93944594	0.190330
9	-0.22009264	9.10186000	-2.00325240		9.00000000	3.81555556	34.72865249	0.211823
10	-0.20994560	9.06646350	-1.90346412		10.00000000	3.43400000	31.13423566	0.233216
11	-0.20013794	9.09673120	-1.82060104		11.00000000	3.12181818	28.39834086	0.254597
12	-0.18997826	9.07197090	-1.72347725		12.00000000	2.86166667	25.96095673	0.276125
13	-0.18017581	9.08882710	-1.63758678		13.00000000	2.64153846	24.00848635	0.297596
14	-0.17001538	9.07035540	-1.54209992		14.00000000	2.45285714	22.24828603	0.318969
15	-0.16020697	9.08434300	-1.45537507		15.00000000	2.28933333	20.79708924	0.340368
16	-0.15005250	9.07996180	-1.36247097		16.00000000	2.14625000	19.48786801	0.361713
17	-0.13991812	9.07679270	-1.27000777		17.00000000	2.02000000	18.33512125	0.383205
18	-0.13009632	9.07193950	-1.18022594		18.00000000	1.90777778	17.30724458	0.404604
19	-0.11993290	9.09762100	-1.09110407		19.00000000	1.80736842	16.44275290	0.425992
20	-0.11012897	9.08345510	-1.00035155		20.00000000	1.71700000	15.59629241	0.447350
21	-0.09996184	9.07991500	-0.90764501		21.00000000	1.63523810	14.84782291	0.468827
22	-0.09016088	9.08292960	-0.81892496		22.00000000	1.56090909	14.17762738	0.490213
23	-0.07999896	9.08158590	-0.72651745		23.00000000	1.49304348	13.55920260	0.511595
24	-0.07018311	9.06788730	-0.63641256		24.00000000	1.43083333	12.97463541	0.532957
25	-0.06002343	9.08837990	-0.54551574		25.00000000	1.37360000	12.48379863	0.554450
26	-0.04990840	9.08381370	-0.45335857		26.00000000	1.32076923	11.99762163	0.575831
27	-0.04006204	9.07176400	-0.36343334		27.00000000	1.27185185	11.53793984	0.597222
28	-0.02990756	9.08553310	-0.27172613		28.00000000	1.22642857	11.14275738	0.618706
29	-0.02012595	9.07292270	-0.18260119		29.00000000	1.18413793	10.74359191	0.640099
30	-0.00995808	9.08450980	-0.09046425		30.00000000	1.14466667	10.39873555	0.661456
31	-0.00066767	9.07175730	-0.00605693		31.00000000	1.10774194	10.04916599	0.682953
32	0.00947246	9.09153270	0.08611918		32.00000000	1.07312500	9.75635103	0.704441
33	0.01926793	9.07858370	0.17492553		33.00000000	1.04060606	9.44722922	0.725818
34	0.02943403	9.09413150	0.26767691		34.00000000	1.01000000	9.18507282	0.747163
35	0.03925927	9.07424260	0.35624814		35.00000000	0.98114286	8.90312831	0.768557
36	0.04938220	9.08074000	0.44842691		36.00000000	0.95388889	8.66201699	0.790040
37	0.05924242	9.07807450	0.53780707		37.00000000	0.92810811	8.42543455	0.811429
38	0.06937279	9.08576010	0.63030451		38.00000000	0.90368421	8.21065794	0.832797
39	0.07951209	9.08095840	0.72204597		39.00000000	0.88051282	7.99590029	0.854175
40	0.08934031	9.07941820	0.81115807		40.00000000	0.85850000	7.79468052	0.875646
41	0.09948854	9.08937840	0.90428900		41.00000000	0.83756098	7.61290864	0.897030
42	0.10930039	9.07657430	0.99207311		42.00000000	0.81761905	7.42118003	0.918382
43	0.11947095	9.08251190	1.08509633		43.00000000	0.79860465	7.25333625	0.939776
44	0.12927759	9.07833290	1.17362500		44.00000000	0.78045455	7.08522618	0.961263
45	0.13941763	9.09103680	1.26745080		45.00000000	0.76311111	6.93747119	0.982638
46	0.14928603	9.07812120	1.35523667		46.00000000	0.74652174	6.77701483	1.003990
47	0.15940003	9.08212470	1.44769095		47.00000000	0.73063830	6.63574813	1.025363
48	0.16955051	9.07419110	1.53853373		48.00000000	0.71541667	6.49182755	1.046840
49	0.17934598	9.08488370	1.62933737		49.00000000	0.70081633	6.36683482	1.068229
50	0.18950686	9.07079320	1.71897754		50.00000000	0.68680000	6.22982077	1.089626
51	0.19932094	9.08310130	1.81045229		51.00000000	0.67333333	6.11595488	1.110996
52	0.20945279	9.07275200	1.90031322		52.00000000	0.66038462	5.99150584	1.132471
53	0.21927284	9.08555130	1.99221464		53.00000000	0.64792453	5.88675154	1.153850
54	0.22941436	9.08403780	2.08400872		54.00000000	0.63592593	5.77677515	1.175233
55	0.23925896	9.07794950	2.17198076		55.00000000	0.62436364	5.66794156	1.196582
56	0.24936180	9.08062460	2.26436090		56.00000000	0.61321429	5.56836873	1.218053
57	0.25950781	9.07197760	2.35424904		57.00000000	0.60245614	5.46546861	1.239444
58	0.26934123	9.06763550	2.44228810		58.00000000	0.59206897	5.36866557	1.260826
59	0.27949020	9.07244210	2.53565866		59.00000000	0.58203390	5.28046884	1.282315
60	0.28931692	9.07546230	2.62568480		60.00000000	0.57233333	5.19418959	1.303706
61	0.29946366	9.08449650	2.72047657		61.00000000	0.56295082	5.11412475	1.325068
62	0.30926883	9.08166120	2.80867473		62.00000000	0.55387097	5.03006848	1.346453
63	0.31942153	9.08050630	2.90050922		63.00000000	0.54507937	4.94959661	1.367948
64	0.32923189	9.07924940	2.98917844		64.00000000	0.53656250	4.87158476	1.389330
65	0.33938828	9.07502560	3.07995733		65.00000000	0.52830769	4.79440583	1.410677
66	0.34922841	9.06971650	3.16740267		66.00000000	0.52030303	4.71900098	1.432065
67	0.35937145	9.06826310	3.25887486		67.00000000	0.51253731	4.64782321	1.453566
68	0.36951968	9.07245160	3.35244941		68.00000000	0.50500000	4.58158806	1.474935
69	0.37933153	9.06368640	3.43814203		69.00000000	0.49768116	4.51082596	1.496294
70	0.38949242	9.06880190	3.53222960		70.00000000	0.49057143	4.44889510	1.517673
71	0.39929235	9.06606960	3.62001224		71.00000000	0.48366197	4.38491310	1.539145
72	0.40943238	9.06109140	3.70990422		72.00000000	0.47694444	4.32163720	1.560537
73	0.41926953	9.07552620	3.80509160		73.00000000	0.47041096	4.26922698	1.581881
74	0.42941850	9.05244450	3.88728714		74.00000000	0.46405405	4.20082357	1.603263
75	0.43922368	9.05771830	3.97836436		75.00000000	0.45786667	4.14722729	1.624745
76	0.44940984	9.05564880	4.06969768		76.00000000	0.45184211	4.09172342	1.646128
77	0.45951790	9.04153820	4.15474865		77.00000000	0.44597403	4.03229119	1.667492
78	0.46941459	9.04920200	4.24782745		78.00000000	0.44025641	3.98396919	1.688875
79	0.47955760	9.02449990	4.32776751		79.00000000	0.43468354	3.92280160	1.710363
80	0.48937318	9.02158640	4.41492243		80.00000000	0.42925000	3.87251596	1.731751
81	0.49948272	9.00130180	4.49599471		81.00000000	0.42395062	3.81610745	1.753115
82	0.50931388	8.97936920	4.57331737		82.00000000	0.41878049	3.76038461	1.774482
83	0.51946956	8.94625380	4.64730653		83.00000000	0.41373494	3.70137778	1.795972
84	0.52922112	8.91845130	4.71983279		84.00000000	0.40880952	3.64594783	1.817371
85	0.53935152	8.85072140	4.77365004		85.00000000	0.40400000	3.57569145	1.838770
86	0.54953396	8.77795220	4.82378283		86.00000000	0.39930233	3.50505673	1.860115
87	0.55933022	8.67385770	4.85155074		87.00000000	0.39471264	3.42368130	1.881594
88	0.56946802	8.52705480	4.85588501		88.00000000	0.39022727	3.32748934	1.902990
89	0.57925308	8.32455060	4.82202157		89.00000000	0.38584270	3.21196705	1.924375
90	0.58937675	8.05504610	4.74745689		90.00000000	0.38155556	3.07344759	1.945863
91	0.59920275	7.68274590	4.60352247		91.00000000	0.37736264	2.89918126	1.967249
92	0.60932863	7.18989560	4.38100924		92.00000000	0.37326087	2.68370668	1.988724
93	0.61913377	6.53767630	4.04769617		93.00000000	0.36924731	2.41401940	2.010128
94	0.62921876	5.71277190	3.59458325		94.00000000	0.36531915	2.08698497	2.031634
95	0.63932830	4.61168430	2.94838028		95.00000000	0.36147368	1.66700251	2.053019
96	0.64911783	3.29468390	2.13863806		96.00000000	0.35770833	1.17853589	2.074374
97	0.65925783	1.63740710	1.07947345		97.00000000	0.35402062	0.57967587	2.095757
98	0.66896027	-0.33424070	-0.22359375		98.00000000	0.35040816	-0.11712067	2.117245
99	0.67903858	-2.69824890	-1.83221510		99.00000000	0.34686869	-0.93593805	2.138695
100	0.68883479	-5.43700410	-3.74519758		100.00000000	0.34340000	-1.86706721	2.160059
101	0.69908500	-8.70179750	-6.08329611		101.00000000	0.34000000	-2.95861115	2.181446
09:33 04/04/2018
Test Lot:	JK-PERC
Recipe:	Recipe_YJX-LID
Cell Name:	3-12-11h
Test Order:	3
Test Condition:	Light
1	-0.29995444	9.08915710	-2.72633303		1.00000000	34.34000000	312.12165481	0.000000
2	-0.29015720	9.07561400	-2.63335475		2.00000000	17.17000000	155.82829238	0.061783
3	-0.28002208	9.09502220	-2.54680703		3.00000000	11.44666667	104.10768745	0.083172
4	-0.27018169	9.07697580	-2.45243266		4.00000000	8.58500000	77.92583724	0.104559
5	-0.26002124	9.08030890	-2.36107318		5.00000000	6.86800000	62.36356153	0.126060
6	-0.24986975	9.08176710	-2.26925887		6.00000000	5.72333333	51.97798037	0.147439
7	-0.24005465	9.08118150	-2.17997985		7.00000000	4.90571429	44.54968182	0.168808
8	-0.22988530	9.07474800	-2.08615117		8.00000000	4.29250000	38.95335579	0.190170
9	-0.22007020	9.07807730	-1.99781429		9.00000000	3.81555556	34.63790828	0.211688
10	-0.20992987	9.08028700	-1.90622347		10.00000000	3.43400000	31.18170556	0.233088
11	-0.20010063	9.08245660	-1.81740529		11.00000000	3.12181818	28.35377815	0.254475
12	-0.18995956	9.08725450	-1.72621087		12.00000000	2.86166667	26.00469329	0.275824
13	-0.18015860	9.08315750	-1.63640894		13.00000000	2.64153846	23.99350989	0.297319
14	-0.17000711	9.07301040	-1.54247628		14.00000000	2.45285714	22.25479837	0.318694
15	-0.16020839	9.08422370	-1.45536885		15.00000000	2.28933333	20.79681612	0.340091
16	-0.15004647	9.07750800	-1.36204803		16.00000000	2.14625000	19.48260155	0.361583
17	-0.13990316	9.08015160	-1.27034190		17.00000000	2.02000000	18.34190623	0.382949
18	-0.13008435	9.07652660	-1.18071406		18.00000000	1.90777778	17.31599575	0.404310
19	-0.11994178	9.08730320	-1.08994732		19.00000000	1.80736842	16.42410484	0.425683
20	-0.11009840	9.08147050	-0.99985537		20.00000000	1.71700000	15.59288485	0.447163
21	-0.09994096	9.07898330	-0.90736227		21.00000000	1.63523810	14.84629936	0.468552
22	-0.09012735	9.07818410	-0.81819267		22.00000000	1.56090909	14.17022009	0.489904
23	-0.08000488	9.08188250	-0.72659490		23.00000000	1.49304348	13.55964544	0.511282
24	-0.07019797	9.08682440	-0.63787663		24.00000000	1.43083333	13.00173125	0.532762
25	-0.06004647	9.07725620	-0.54505721		25.00000000	1.37360000	12.46851912	0.554127
26	-0.04988753	9.10210990	-0.45408182		26.00000000	1.32076923	12.02178669	0.575468
27	-0.04008062	9.08270360	-0.36404041		27.00000000	1.27185185	11.55185339	0.596843
28	-0.02993732	9.06904030	-0.27150273		28.00000000	1.22642857	11.12253014	0.618328
29	-0.02012222	9.07868960	-0.18268338		29.00000000	1.18413793	10.75042072	0.639718
30	-0.00999305	9.08992000	-0.09083604		30.00000000	1.14466667	10.40492843	0.661067
31	-0.00068404	9.07387640	-0.00620690		31.00000000	1.10774194	10.05151341	0.682561
32	0.00949404	9.08174420	0.08622244		32.00000000	1.07312500	9.74584674	0.704043
33	0.01928132	9.07563590	0.17499024		33.00000000	1.04060606	9.44416172	0.725412
34	0.02946974	9.09387210	0.26799403		34.00000000	1.01000000	9.18481082	0.746766
35	0.03925925	9.08203790	0.35655401		35.00000000	0.98114286	8.91077661	0.768149
36	0.04941418	9.08002190	0.44868180		36.00000000	0.95388889	8.66133200	0.789619
37	0.05923792	9.09192470	0.53858674		37.00000000	0.92810811	8.43828903	0.810999
38	0.06935490	9.06532000	0.62872435		38.00000000	0.90368421	8.19218655	0.832372
39	0.07951503	9.09024520	0.72281114		39.00000000	0.88051282	8.00407744	0.853742
40	0.08936632	9.07715130	0.81119158		40.00000000	0.85850000	7.79273439	0.875218
41	0.09951157	9.07326600	0.90289495		41.00000000	0.83756098	7.59941352	0.896602
42	0.10930704	9.07485290	0.99194531		42.00000000	0.81761905	7.41977259	0.917974
43	0.11948504	9.07839300	1.08473215		43.00000000	0.79860465	7.25004687	0.939318
44	0.12931697	9.07954790	1.17413962		44.00000000	0.78045455	7.08617443	0.960806
45	0.13945775	9.07303520	1.26530507		45.00000000	0.76311111	6.92373397	0.982180
46	0.14926811	9.09179120	1.35711449		46.00000000	0.74652174	6.78721978	1.003578
47	0.15942006	9.07747650	1.44713185		47.00000000	0.73063830	6.63235198	1.025068
48	0.16954818	9.08003810	1.53950393		48.00000000	0.71541667	6.49601059	1.046451
49	0.17936301	9.06526850	1.62597384		49.00000000	0.70081633	6.35308817	1.067802
50	0.18952613	9.09445290	1.72363646		50.00000000	0.68680000	6.24607025	1.089176
51	0.19930224	9.07420730	1.80850984		51.00000000	0.67333333	6.10996625	1.110646
52	0.20944898	9.08118820	1.90204561		52.00000000	0.66038462	5.99707698	1.132034
53	0.21924965	9.08360960	1.99157823		53.00000000	0.64792453	5.88549347	1.153379
54	0.22943436	9.08388040	2.08415429		54.00000000	0.63592593	5.77667505	1.174745
55	0.23924246	9.07719140	2.17164960		55.00000000	0.62436364	5.66746823	1.196253
56	0.24940261	9.07088760	2.26230304		56.00000000	0.61321429	5.56239786	1.217630
57	0.25953743	9.07797530	2.35607438		57.00000000	0.60245614	5.46908196	1.239008
58	0.26934332	9.08667760	2.44743591		58.00000000	0.59206897	5.37993981	1.260380
59	0.27948412	9.07099630	2.53519942		59.00000000	0.58203390	5.27962734	1.281851
60	0.28930786	9.08147340	2.62734164		60.00000000	0.57233333	5.19762994	1.303229
61	0.29945907	9.07391170	2.71726516		61.00000000	0.56295082	5.10816603	1.324568
62	0.30929399	9.07704450	2.80747531		62.00000000	0.55387097	5.02751142	1.345942
63	0.31942508	9.07445910	2.89860982		63.00000000	0.54507937	4.94630040	1.367416
64	0.32926819	9.07136150	2.98691078		64.00000000	0.53656250	4.86735240	1.388780
65	0.33940673	9.07563210	3.08033061		65.00000000	0.52830769	4.79472625	1.410121
66	0.34922901	9.05772300	3.16321964		66.00000000	0.52030303	4.71276072	1.431492
67	0.35935712	9.07862660	3.26246911		67.00000000	0.51253731	4.65313489	1.452973
68	0.36952993	9.08413890	3.35686121		68.00000000	0.50500000	4.58749014	1.474343
69	0.37934995	9.05640320	3.43554610		69.00000000	0.49768116	4.50720124	1.495718
70	0.38950861	9.06660650	3.53152130		70.00000000	0.49057143	4.44781810	1.517080
71	0.39933011	9.08009530	3.62595545		71.00000000	0.48366197	4.39169680	1.538558
72	0.40944260	9.07234290	3.71460367		72.00000000	0.47694444	4.32700354	1.559935
73	0.41927081	9.06539150	3.80085404		73.00000000	0.47041096	4.26445951	1.581314
74	0.42946595	9.06142330	3.89157277		74.00000000	0.46405405	4.20499022	1.602665
75	0.43926811	9.05183980	3.97618456		75.00000000	0.45786667	4.14453572	1.624147
76	0.44943270	9.04175470	4.06366023		76.00000000	0.45184211	4.08544548	1.645514
77	0.45958763	9.05056190	4.15952629		77.00000000	0.44597403	4.03631553	1.666902
78	0.46942627	9.02607820	4.23707822		78.00000000	0.44025641	3.97378879	1.688388
79	0.47952092	9.03123570	4.33066645		79.00000000	0.43468354	3.92572954	1.709763
80	0.48937741	9.01723290	4.41283008		80.00000000	0.42925000	3.87064722	1.731120
81	0.49951968	8.98675820	4.48906258		81.00000000	0.42395062	3.80994169	1.752493
82	0.50933897	8.96862030	4.56806783		82.00000000	0.41878049	3.75588318	1.773972
83	0.51947308	8.94885540	4.64868948		83.00000000	0.41373494	3.70245415	1.795358
84	0.52925438	8.92126940	4.72162091		84.00000000	0.40880952	3.64709990	1.816698
85	0.53938848	8.84991260	4.77354091		85.00000000	0.40400000	3.57536469	1.838070
86	0.54952854	8.78564170	4.82796086		86.00000000	0.39930233	3.50812716	1.859546
87	0.55933142	8.66572570	4.84701266		87.00000000	0.39471264	3.42047150	1.880928
88	0.56945360	8.53413200	4.85979219		88.00000000	0.39022727	3.33025106	1.902287
89	0.57928032	8.33041000	4.82564257		89.00000000	0.38584270	3.21422786	1.923664
90	0.58941591	8.05030630	4.74497861		90.00000000	0.38155556	3.07163909	1.945156
91	0.59921438	7.69979240	4.61382633		91.00000000	0.37736264	2.90561397	1.966546
92	0.60934472	7.19773530	4.38590200		92.00000000	0.37326087	2.68663294	1.988007
93	0.61913347	6.55706410	4.05969785		93.00000000	0.36924731	2.42117829	2.009401
94	0.62926459	5.71721220	3.59763919		94.00000000	0.36531915	2.08860710	2.030903
95	0.63936442	4.62533040	2.95727169		95.00000000	0.36147368	1.67193522	2.052282
96	0.64915842	3.30485060	2.14537159		96.00000000	0.35770833	1.18217260	2.073624
97	0.65927690	1.61963510	1.06778801		97.00000000	0.35402062	0.57338422	2.095001
98	0.66897190	-0.34710366	-0.23220259		98.00000000	0.35040816	-0.12162796	2.116481
99	0.67906874	-2.74983140	-1.86732454		99.00000000	0.34686869	-0.95383041	2.137856
100	0.68875337	-5.49290850	-3.78325924		100.00000000	0.34340000	-1.88626478	2.159227
101	0.69904071	-8.79522510	-6.14822040		101.00000000	0.34000000	-2.99037653	2.180584
09:34 04/04/2018
Test Lot:	JK-PERC
Recipe:	Recipe_YJX-LID
Cell Name:	3-12-11h
Test Order:	4
Test Condition:	Light
1	-0.29999974	9.08529570	-2.72558635		1.00000000	34.34000000	311.98905434	0.000000
2	-0.29017350	9.09001350	-2.63768103		2.00000000	17.17000000	156.07553180	0.061795
3	-0.28001457	9.07281210	-2.54051958		3.00000000	11.44666667	103.85345584	0.083261
4	-0.27022031	9.09206010	-2.45685930		4.00000000	8.58500000	78.05533596	0.104763
5	-0.26001003	9.07928560	-2.36070532		5.00000000	6.86800000	62.35653350	0.126154
6	-0.24985555	9.08543400	-2.27004611		6.00000000	5.72333333	51.99896726	0.147499
7	-0.24008287	9.07300090	-2.17827210		7.00000000	4.90571429	44.50955013	0.168877
8	-0.22989492	9.08419610	-2.08841054		8.00000000	4.29250000	38.99391176	0.190352
9	-0.22005974	9.08370490	-1.99895774		9.00000000	3.81555556	34.65938070	0.211727
10	-0.20995289	9.08377840	-1.90716553		10.00000000	3.43400000	31.19369503	0.233079
11	-0.20008868	9.07078460	-1.81496132		11.00000000	3.12181818	28.31734029	0.254461
12	-0.18996398	9.09279250	-1.72730305		12.00000000	2.86166667	26.02054120	0.275924
13	-0.18017419	9.08124350	-1.63620569		13.00000000	2.64153846	23.98845398	0.297299
14	-0.17005470	9.07442090	-1.54314792		14.00000000	2.45285714	22.25825812	0.318673
15	-0.16019495	9.08312130	-1.45507016		15.00000000	2.28933333	20.79429236	0.340042
16	-0.15008514	9.07253650	-1.36165291		16.00000000	2.14625000	19.47193146	0.361515
17	-0.13990983	9.09836670	-1.27295094		17.00000000	2.02000000	18.37870073	0.382894
18	-0.13009399	9.06966110	-1.17990840		18.00000000	1.90777778	17.30289790	0.404236
19	-0.11995068	9.08759880	-1.09006366		19.00000000	1.80736842	16.42463909	0.425613
20	-0.11013261	9.07388690	-0.99933085		20.00000000	1.71700000	15.57986381	0.447091
21	-0.09997814	9.08508680	-0.90831009		21.00000000	1.63523810	14.85628003	0.468476
22	-0.09018314	9.08643050	-0.81944282		22.00000000	1.56090909	14.18309197	0.489818
23	-0.08001676	9.07553770	-0.72619514		23.00000000	1.49304348	13.55017237	0.511190
24	-0.07018083	9.08788590	-0.63779540		24.00000000	1.43083333	13.00325008	0.532666
25	-0.06004497	9.08771710	-0.54567167		25.00000000	1.37360000	12.48288821	0.554037
26	-0.04988976	9.07634350	-0.45281655		26.00000000	1.32076923	11.98775522	0.575389
27	-0.04007317	9.09375380	-0.36441555		27.00000000	1.27185185	11.56590761	0.596757
28	-0.02994921	9.08654590	-0.27213491		28.00000000	1.22642857	11.14399951	0.618225
29	-0.02013412	9.07702450	-0.18275791		29.00000000	1.18413793	10.74844901	0.639598
30	-0.00996402	9.08818820	-0.09055491		30.00000000	1.14466667	10.40294609	0.660982
31	-0.00067436	9.07531740	-0.00612007		31.00000000	1.10774194	10.05310966	0.682426
32	0.00946948	9.08228490	0.08600450		32.00000000	1.07312500	9.74642698	0.703901
33	0.01927462	9.08102320	0.17503325		33.00000000	1.04060606	9.44976778	0.725287
34	0.02943326	9.07840630	0.26720712		34.00000000	1.01000000	9.16919036	0.746677
35	0.03926296	9.06902500	0.35607678		35.00000000	0.98114286	8.89800910	0.768153
36	0.04941417	9.07905200	0.44863377		36.00000000	0.95388889	8.66040682	0.789521
37	0.05921484	9.08665940	0.53806510		37.00000000	0.92810811	8.43340226	0.810867
38	0.06937423	9.06965260	0.62920019		38.00000000	0.90368421	8.19610185	0.832249
39	0.07953213	9.08454320	0.72251309		39.00000000	0.88051282	7.99905676	0.853727
40	0.08934844	9.08228020	0.81148752		40.00000000	0.85850000	7.79713755	0.875109
41	0.09952420	9.08462620	0.90414015		41.00000000	0.83756098	7.60892838	0.896464
42	0.10932636	9.07374860	0.99199991		42.00000000	0.81761905	7.41886969	0.917845
43	0.11949021	9.08545400	1.08562281		43.00000000	0.79860465	7.25568582	0.939318
44	0.12930800	9.07914260	1.17400577		44.00000000	0.78045455	7.08585811	0.960697
45	0.13944060	9.08133220	1.26630641		45.00000000	0.76311111	6.93006551	0.982037
46	0.14925615	9.07996650	1.35524084		46.00000000	0.74652174	6.77839238	1.003403
47	0.15942076	9.08868030	1.44892432		47.00000000	0.73063830	6.64053790	1.024883
48	0.16956824	9.08022400	1.53971760		48.00000000	0.71541667	6.49614359	1.046253
49	0.17939496	9.07135200	1.62735483		49.00000000	0.70081633	6.35735159	1.067600
50	0.18953873	9.08218480	1.72142577		50.00000000	0.68680000	6.23764452	1.088980
51	0.19930740	9.07269380	1.80825501		51.00000000	0.67333333	6.10894716	1.110466
52	0.20947869	9.07599830	1.90122823		52.00000000	0.66038462	5.99364965	1.131851
53	0.21927193	9.08298590	1.99164385		53.00000000	0.64792453	5.88508935	1.153194
54	0.22939932	9.07259370	2.08124683		54.00000000	0.63592593	5.76949755	1.174563
55	0.23923050	9.08445260	2.17327814		55.00000000	0.62436364	5.67200186	1.196034
56	0.24934970	9.09451960	2.26771573		56.00000000	0.61321429	5.57688934	1.217409
57	0.25954184	9.06861970	2.35368624		57.00000000	0.60245614	5.46344562	1.238772
58	0.26931423	9.06775380	2.44207513		58.00000000	0.59206897	5.36873561	1.260149
59	0.27948329	9.07818600	2.53720129		59.00000000	0.58203390	5.28381199	1.281621
60	0.28929514	9.07704640	2.62594541		60.00000000	0.57233333	5.19509622	1.302988
61	0.29945824	9.08189300	2.71964769		61.00000000	0.56295082	5.11265911	1.324381
62	0.30927008	9.07417390	2.80637049		62.00000000	0.55387097	5.02592148	1.345737
63	0.31945404	9.08129020	2.90105484		63.00000000	0.54507937	4.95002390	1.367189
64	0.32924056	9.07061100	2.98641305		64.00000000	0.53656250	4.86694971	1.388583
65	0.33938879	9.08028890	3.08174826		65.00000000	0.52830769	4.79718647	1.409964
66	0.34922221	9.06494810	3.16568121		66.00000000	0.52030303	4.71651997	1.431438
67	0.35935926	9.06960770	3.25924751		67.00000000	0.51253731	4.64851236	1.452811
68	0.36948591	9.06553360	3.34958693		68.00000000	0.50500000	4.57809447	1.474152
69	0.37934166	9.07233140	3.44151325		69.00000000	0.49768116	4.51512841	1.495536
70	0.38950703	9.06169700	3.52959469		70.00000000	0.49057143	4.44540964	1.517014
71	0.39935383	9.06457420	3.61997242		71.00000000	0.48366197	4.38418983	1.538390
72	0.40945888	9.06284330	3.71086167		72.00000000	0.47694444	4.32247276	1.559753
73	0.41929603	9.06631660	3.80147056		73.00000000	0.47041096	4.26489469	1.581132
74	0.42942342	9.06331060	3.89199783		74.00000000	0.46405405	4.20586603	1.602604
75	0.43925312	9.06239600	3.98068572		75.00000000	0.45786667	4.14936905	1.623992
76	0.44942516	9.04345700	4.06435711		76.00000000	0.45184211	4.08621465	1.645345
77	0.45956966	9.04589080	4.15721696		77.00000000	0.44597403	4.03423234	1.666715
78	0.46941203	9.02630900	4.23705803		78.00000000	0.44025641	3.97389040	1.688195
79	0.47954834	9.03278260	4.33165590		79.00000000	0.43468354	3.92640196	1.709566
80	0.48937729	9.00830270	4.40845876		80.00000000	0.42925000	3.86681393	1.730911
81	0.49950618	9.00026230	4.49568664		81.00000000	0.42395062	3.81566676	1.752281
82	0.50932246	8.97242070	4.56985538		82.00000000	0.41878049	3.75747472	1.773766
83	0.51948035	8.95507240	4.65198414		83.00000000	0.41373494	3.70502634	1.795157
84	0.52924460	8.89582730	4.70806856		84.00000000	0.40880952	3.63669892	1.816508
85	0.53936231	8.86227320	4.77997615		85.00000000	0.40400000	3.58035837	1.837887
86	0.54954106	8.79530910	4.83338349		86.00000000	0.39930233	3.51198738	1.859360
87	0.55934989	8.66807940	4.84848926		87.00000000	0.39471264	3.42140054	1.880741
88	0.56947058	8.52977850	4.85745791		88.00000000	0.39022727	3.32855220	1.902100
89	0.57928765	8.32108020	4.82029899		89.00000000	0.38584270	3.21062802	1.923515
90	0.58940089	8.06276990	4.75220375		90.00000000	0.38155556	3.07639465	1.944993
91	0.59919190	7.69976470	4.61363664		91.00000000	0.37736264	2.90560351	1.966367
92	0.60932744	7.19457580	4.38385245		92.00000000	0.37326087	2.68545362	1.987850
93	0.61911249	6.56732990	4.06591597		93.00000000	0.36924731	2.42496891	2.009227
94	0.62920266	5.70328140	3.58851983		94.00000000	0.36531915	2.08351791	2.030719
95	0.63936281	4.63480660	2.96332297		95.00000000	0.36147368	1.67536062	2.052093
96	0.64911735	3.29652210	2.13982969		96.00000000	0.35770833	1.17919343	2.073472
97	0.65929532	1.61725090	1.06624595		97.00000000	0.35402062	0.57254016	2.094985
98	0.66896278	-0.35166377	-0.23524997		98.00000000	0.35040816	-0.12322586	2.116369
99	0.67906564	-2.76471470	-1.87742276		99.00000000	0.34686869	-0.95899296	2.137736
100	0.68876803	-5.52281570	-3.80393889		100.00000000	0.34340000	-1.89653491	2.159119
101	0.69904131	-8.83792020	-6.17807131		101.00000000	0.34000000	-3.00489287	2.180606
