# Supplementary material for: Study on the Electrical Injection Regeneration of Industrialized B-Doped Czochralski Silicon PERC Solar Cells
Source: Hindawi journal article supplement (doi:10.1155/2019/5357370), 2019-06-20
Supplement: f1 [file 5357370.f1.zip › section3.3/IVRawData_3-12-12h.csv]

10:35 04/04/2018
Test Lot:	JK-PERC
Recipe:	Recipe_YJX-LID
Cell Name:	3-12-12h
Test Order:	2
Test Condition:	Light
1	-0.29995969	9.08287330	-2.72449586		1.00000000	34.34000000	311.90586912	0.000000
2	-0.29014501	9.07833290	-2.63403299		2.00000000	17.17000000	155.87497589	0.061789
3	-0.27998868	9.08095460	-2.54256449		3.00000000	11.44666667	103.94666032	0.083206
4	-0.27017176	9.07659530	-2.45223973		4.00000000	8.58500000	77.92257065	0.104697
5	-0.25999981	9.08160500	-2.36121557		5.00000000	6.86800000	62.37246314	0.126144
6	-0.24986881	9.08473970	-2.26999310		6.00000000	5.72333333	51.99499355	0.147504
7	-0.24004519	9.07596300	-2.17864126		7.00000000	4.90571429	44.52408135	0.168875
8	-0.22988738	9.07352640	-2.08588921		8.00000000	4.29250000	38.94811207	0.190369
9	-0.22003771	9.08154010	-1.99828129		9.00000000	3.81555556	34.65112078	0.211747
10	-0.20989554	9.07757850	-1.90534324		10.00000000	3.43400000	31.17240457	0.233151
11	-0.20010839	9.08947090	-1.81887939		11.00000000	3.12181818	28.37567552	0.254530
12	-0.18993942	9.07723430	-1.72412462		12.00000000	2.86166667	25.97601882	0.276010
13	-0.18015003	9.07431030	-1.63473727		13.00000000	2.64153846	23.97013967	0.297387
14	-0.17001531	9.07650850	-1.54314541		14.00000000	2.45285714	22.26337871	0.318768
15	-0.16017456	9.07866950	-1.45417189		15.00000000	2.28933333	20.78410071	0.340113
16	-0.15007555	9.07261180	-1.36157721		16.00000000	2.14625000	19.47209308	0.361574
17	-0.13993712	9.07031730	-1.26927408		17.00000000	2.02000000	18.32204095	0.382952
18	-0.13010977	9.07447910	-1.18067839		18.00000000	1.90777778	17.31208957	0.404337
19	-0.11997132	9.08162690	-1.08953477		19.00000000	1.80736842	16.41384567	0.425738
20	-0.11015960	9.07378290	-0.99956429		20.00000000	1.71700000	15.57968524	0.447214
21	-0.09996235	9.08281520	-0.90793959		21.00000000	1.63523810	14.85256543	0.468574
22	-0.09017594	9.07328220	-0.81819177		22.00000000	1.56090909	14.16256867	0.489964
23	-0.08004791	9.07873150	-0.72673351		23.00000000	1.49304348	13.55494086	0.511435
24	-0.07018336	9.07617280	-0.63699629		24.00000000	1.43083333	12.98649058	0.532815
25	-0.06005533	9.07394980	-0.54493902		25.00000000	1.37360000	12.46397745	0.554166
26	-0.04987669	9.08117100	-0.45293871		26.00000000	1.32076923	11.99413124	0.575542
27	-0.04009400	9.07877350	-0.36400431		27.00000000	1.27185185	11.54685489	0.597011
28	-0.02990568	9.07956790	-0.27153066		28.00000000	1.22642857	11.13544149	0.618390
29	-0.02008652	9.07367990	-0.18225868		29.00000000	1.18413793	10.74448854	0.639740
30	-0.01000613	9.08202270	-0.09087586		30.00000000	1.14466667	10.39588865	0.661122
31	-0.00072880	9.07313250	-0.00661247		31.00000000	1.10774194	10.05068936	0.682707
32	0.00949504	9.09331420	0.08634135		32.00000000	1.07312500	9.75826280	0.704085
33	0.01931615	9.07697580	0.17533221		33.00000000	1.04060606	9.44555603	0.725445
34	0.02942826	9.07462120	0.26705031		34.00000000	1.01000000	9.16536741	0.746815
35	0.03924788	9.07627490	0.35622457		35.00000000	0.98114286	8.90512229	0.768298
36	0.04936520	9.07185750	0.44783410		36.00000000	0.95388889	8.65354407	0.789678
37	0.05920790	9.08609770	0.53796875		37.00000000	0.92810811	8.43288095	0.811029
38	0.06934010	9.08139510	0.62970486		38.00000000	0.90368421	8.20671336	0.832451
39	0.07950953	9.07022190	0.72116904		39.00000000	0.88051282	7.98644667	0.853932
40	0.08935371	9.07928560	0.81126785		40.00000000	0.85850000	7.79456669	0.875315
41	0.09946582	9.07329560	0.90248276		41.00000000	0.83756098	7.59943831	0.896667
42	0.10925642	9.07015320	0.99097247		42.00000000	0.81761905	7.41593002	0.918043
43	0.11945337	9.06941890	1.08337265		43.00000000	0.79860465	7.24288012	0.939516
44	0.12929606	9.06703570	1.17233199		44.00000000	0.78045455	7.07640923	0.960888
45	0.13943645	9.08050060	1.26615277		45.00000000	0.76311111	6.92943090	0.982260
46	0.14925310	9.07416530	1.35434730		46.00000000	0.74652174	6.77406166	1.003615
47	0.15937489	9.07236000	1.44590638		47.00000000	0.73063830	6.62861367	1.025090
48	0.16952942	9.07426740	1.53835529		48.00000000	0.71541667	6.49188214	1.046465
49	0.17932598	9.07558920	1.62748893		49.00000000	0.70081633	6.36032108	1.067837
50	0.18947381	9.08077050	1.72056818		50.00000000	0.68680000	6.23667318	1.089199
51	0.19924060	9.06918240	1.80694934		51.00000000	0.67333333	6.10658282	1.110679
52	0.20942564	9.08344460	1.90230620		52.00000000	0.66038462	5.99856707	1.132058
53	0.21922144	9.07136540	1.98863779		53.00000000	0.64792453	5.87756015	1.153446
54	0.22939980	9.08014200	2.08298276		54.00000000	0.63592593	5.77429771	1.174923
55	0.23922017	9.07342910	2.17054725		55.00000000	0.62436364	5.66511919	1.196311
56	0.24936874	9.07299040	2.26252018		56.00000000	0.61321429	5.56368733	1.217667
57	0.25952327	9.08277030	2.35719025		57.00000000	0.60245614	5.47197074	1.239039
58	0.26929155	9.06431390	2.44094314		58.00000000	0.59206897	5.36669895	1.260518
59	0.27946395	9.07877160	2.53718937		59.00000000	0.58203390	5.28415283	1.281890
60	0.28930292	9.06871320	2.62360521		60.00000000	0.57233333	5.19032685	1.303293
61	0.29945821	9.06622790	2.71495638		61.00000000	0.56295082	5.10384043	1.324693
62	0.30928302	9.07506470	2.80676342		62.00000000	0.55387097	5.02641487	1.346188
63	0.31941226	9.08221630	2.90097123		63.00000000	0.54507937	4.95052869	1.367555
64	0.32922220	9.06578920	2.98465907		64.00000000	0.53656250	4.86436252	1.388924
65	0.33939013	9.07045750	3.07842375		65.00000000	0.52830769	4.79199247	1.410303
66	0.34918967	9.06148530	3.16417706		66.00000000	0.52030303	4.71471826	1.431779
67	0.35934940	9.07596780	3.26144358		67.00000000	0.51253731	4.65177215	1.453173
68	0.36951140	9.06412030	3.34929578		68.00000000	0.50500000	4.57738075	1.474519
69	0.37932804	9.06964300	3.44036990		69.00000000	0.49768116	4.51379044	1.495898
70	0.38950044	9.07105830	3.53318120		70.00000000	0.49057143	4.45000203	1.517380
71	0.39931187	9.07223130	3.62264965		71.00000000	0.48366197	4.38789328	1.538754
72	0.40946195	9.06722450	3.71268342		72.00000000	0.47694444	4.32456235	1.560105
73	0.41929644	9.05891700	3.79837165		73.00000000	0.47041096	4.26141383	1.581471
74	0.42942047	9.06205270	3.89143093		74.00000000	0.46405405	4.20528229	1.602951
75	0.43923935	9.05063250	3.97539394		75.00000000	0.45786667	4.14398293	1.624336
76	0.44940504	9.05027680	4.06724001		76.00000000	0.45184211	4.08929612	1.645699
77	0.45953426	9.04297540	4.15555701		77.00000000	0.44597403	4.03293215	1.667059
78	0.46939409	9.03809260	4.24242725		78.00000000	0.44025641	3.97907820	1.688529
79	0.47953895	9.02351280	4.32712585		79.00000000	0.43468354	3.92237253	1.709901
80	0.48937419	9.01178460	4.41013479		80.00000000	0.42925000	3.86830854	1.731288
81	0.49948630	9.00265220	4.49670144		81.00000000	0.42395062	3.81667996	1.752643
82	0.50928062	8.96353050	4.56495237		82.00000000	0.41878049	3.75375168	1.774118
83	0.51941431	8.95078660	4.64916665		83.00000000	0.41373494	3.70325315	1.795500
84	0.52920640	8.90290830	4.71147605		84.00000000	0.40880952	3.63959370	1.816888
85	0.53936392	8.85419850	4.77563521		85.00000000	0.40400000	3.57709619	1.838382
86	0.54950130	8.77846620	4.82377859		86.00000000	0.39930233	3.50526197	1.859767
87	0.55931503	8.67038250	4.84947525		87.00000000	0.39471264	3.42230960	1.881133
88	0.56944495	8.52461430	4.85429856		88.00000000	0.39022727	3.32653699	1.902506
89	0.57926834	8.32908440	4.82477489		89.00000000	0.38584270	3.21371639	1.923993
90	0.58938044	8.06748100	4.75481550		90.00000000	0.38155556	3.07819219	1.945372
91	0.59919411	7.70456410	4.61652943		91.00000000	0.37736264	2.90741463	1.966715
92	0.60931587	7.21483420	4.39611298		92.00000000	0.37326087	2.69301529	1.988205
93	0.61910427	6.56654600	4.06537667		93.00000000	0.36924731	2.42467946	2.009703
94	0.62919629	5.72433380	3.60172959		94.00000000	0.36531915	2.09120875	2.031086
95	0.63933963	4.63573550	2.96380942		95.00000000	0.36147368	1.67569639	2.052448
96	0.64910865	3.30691340	2.14654609		96.00000000	0.35770833	1.18291048	2.073822
97	0.65922821	1.60775480	1.05987732		97.00000000	0.35402062	0.56917835	2.095300
98	0.66894811	-0.36433941	-0.24372416		98.00000000	0.35040816	-0.12766750	2.116680
99	0.67905128	-2.80641630	-1.90570058		99.00000000	0.34686869	-0.97345794	2.138087
100	0.68876296	-5.59376380	-3.85277731		100.00000000	0.34340000	-1.92089849	2.159477
101	0.69906116	-8.97173400	-6.27179078		101.00000000	0.34000000	-3.05038956	2.180962
10:35 04/04/2018
Test Lot:	JK-PERC
Recipe:	Recipe_YJX-LID
Cell Name:	3-12-12h
Test Order:	3
Test Condition:	Light
1	-0.29994684	9.06939220	-2.72033553		1.00000000	34.34000000	311.44292815	0.000000
2	-0.29013586	9.09024810	-2.63740695		2.00000000	17.17000000	156.07955988	0.061785
3	-0.27999815	9.07419870	-2.54075885		3.00000000	11.44666667	103.86932779	0.083218
4	-0.27016780	9.08289810	-2.45390660		4.00000000	8.58500000	77.97668019	0.104650
5	-0.26003009	9.07609080	-2.36005671		5.00000000	6.86800000	62.33459161	0.126168
6	-0.24984695	9.08354280	-2.26949546		6.00000000	5.72333333	51.98814329	0.147561
7	-0.24004117	9.06504630	-2.17598432		7.00000000	4.90571429	44.47052713	0.168943
8	-0.22991239	9.08150670	-2.08795091		8.00000000	4.29250000	38.98236751	0.190285
9	-0.22010139	9.06681350	-1.99561825		9.00000000	3.81555556	34.59493062	0.211813
10	-0.20992944	9.06747630	-1.90353022		10.00000000	3.43400000	31.13771361	0.233203
11	-0.20011100	9.08044340	-1.81709661		11.00000000	3.12181818	28.34749331	0.254565
12	-0.18994722	9.08009430	-1.72473867		12.00000000	2.86166667	25.98420319	0.275930
13	-0.18016005	9.08193400	-1.63620168		13.00000000	2.64153846	23.99027797	0.297416
14	-0.17004837	9.07709410	-1.54354506		14.00000000	2.45285714	22.26481510	0.318798
15	-0.16018306	9.07158470	-1.45311420		15.00000000	2.28933333	20.76788124	0.340179
16	-0.15003937	9.08527660	-1.36314918		16.00000000	2.14625000	19.49927490	0.361529
17	-0.13989569	9.08383460	-1.27078931		17.00000000	2.02000000	18.34934589	0.383003
18	-0.13010927	9.08191200	-1.18164094		18.00000000	1.90777778	17.32626989	0.404374
19	-0.11994475	9.08181000	-1.08931543		19.00000000	1.80736842	16.41417660	0.425752
20	-0.11012036	9.07072730	-0.99887176		20.00000000	1.71700000	15.57443877	0.447230
21	-0.09995585	9.09341910	-0.90894043		21.00000000	1.63523810	14.86990533	0.468619
22	-0.09013742	9.07492640	-0.81799041		22.00000000	1.56090909	14.16513512	0.489968
23	-0.08001904	9.08774280	-0.72719247		23.00000000	1.49304348	13.56839512	0.511340
24	-0.07015298	9.05695920	-0.63537264		24.00000000	1.43083333	12.95899912	0.532811
25	-0.06002642	9.09891320	-0.54617514		25.00000000	1.37360000	12.49826717	0.554182
26	-0.04989465	9.04997160	-0.45154513		26.00000000	1.32076923	11.95292403	0.575529
27	-0.04006133	9.08066180	-0.36378338		27.00000000	1.27185185	11.54925653	0.596905
28	-0.02987820	9.06956200	-0.27098221		28.00000000	1.22642857	11.12316997	0.618375
29	-0.02006052	9.08169170	-0.18218341		29.00000000	1.18413793	10.75397562	0.639748
30	-0.00992130	9.07121470	-0.08999825		30.00000000	1.14466667	10.38351709	0.661088
31	-0.00063875	9.07958410	-0.00579954		31.00000000	1.10774194	10.05783606	0.682579
32	0.00949431	9.07354070	0.08614697		32.00000000	1.07312500	9.73704336	0.704069
33	0.01931320	9.07765290	0.17531854		33.00000000	1.04060606	9.44626062	0.725447
34	0.02943575	9.07380770	0.26709435		34.00000000	1.01000000	9.16454578	0.746819
35	0.03929186	9.07489970	0.35656971		35.00000000	0.98114286	8.90377302	0.768201
36	0.04942409	9.08160020	0.44884979		36.00000000	0.95388889	8.66283752	0.789686
37	0.05924075	9.07811360	0.53779427		37.00000000	0.92810811	8.42547084	0.811067
38	0.06939903	9.07611750	0.62987374		38.00000000	0.90368421	8.20194408	0.832423
39	0.07952530	9.06762500	0.72110559		39.00000000	0.88051282	7.98416006	0.853802
40	0.08932857	9.08222390	0.81130203		40.00000000	0.85850000	7.79708922	0.875279
41	0.09946898	9.06661510	0.90184692		41.00000000	0.83756098	7.59384299	0.896659
42	0.10929085	9.08155630	0.99253101		42.00000000	0.81761905	7.42525341	0.918025
43	0.11945061	9.07672020	1.08421976		43.00000000	0.79860465	7.24871097	0.939389
44	0.12925164	9.07164670	1.17252521		44.00000000	0.78045455	7.08000790	0.960866
45	0.13940471	9.07113080	1.26455836		45.00000000	0.76311111	6.92228070	0.982248
46	0.14923552	9.08162690	1.35530131		46.00000000	0.74652174	6.77963191	1.003624
47	0.15939751	9.06985280	1.44571195		47.00000000	0.73063830	6.62678181	1.024962
48	0.16956547	9.07856080	1.53941043		48.00000000	0.71541667	6.49495371	1.046437
49	0.17933524	9.07797150	1.62800020		49.00000000	0.70081633	6.36199064	1.067815
50	0.18950690	9.07021330	1.71886800		50.00000000	0.68680000	6.22942249	1.089193
51	0.19925733	9.07773110	1.80880446		51.00000000	0.67333333	6.11233894	1.110676
52	0.20943794	9.07070540	1.89974985		52.00000000	0.66038462	5.99015430	1.132057
53	0.21923673	9.07506280	1.98958709		53.00000000	0.64792453	5.87995578	1.153403
54	0.22941287	9.06836610	2.08039989		54.00000000	0.63592593	5.76680911	1.174789
55	0.23920870	9.07962040	2.17192419		55.00000000	0.62436364	5.66898481	1.196263
56	0.24940790	9.06405160	2.26064608		56.00000000	0.61321429	5.55820593	1.217659
57	0.25956097	9.07163140	2.35464145		57.00000000	0.60245614	5.46526004	1.239009
58	0.26936796	9.08982280	2.44850702		58.00000000	0.59206897	5.38180198	1.260382
59	0.27952176	9.06430340	2.53367004		59.00000000	0.58203390	5.27573184	1.281869
60	0.28935033	9.07974910	2.62722840		60.00000000	0.57233333	5.19664307	1.303241
61	0.29947215	9.06584550	2.71496824		61.00000000	0.56295082	5.10362516	1.324586
62	0.30929998	9.07202720	2.80597783		62.00000000	0.55387097	5.02473248	1.345973
63	0.31944337	9.06755160	2.89656924		63.00000000	0.54507937	4.94253527	1.367441
64	0.32927939	9.07261470	2.98742503		64.00000000	0.53656250	4.86802482	1.388815
65	0.33938557	9.05898860	3.07449001		65.00000000	0.52830769	4.78593336	1.410173
66	0.34921488	9.06920150	3.16710011		66.00000000	0.52030303	4.71873302	1.431547
67	0.35939920	9.06310560	3.25727290		67.00000000	0.51253731	4.64517980	1.453048
68	0.36955598	9.06393810	3.34963253		68.00000000	0.50500000	4.57728874	1.474427
69	0.37936521	9.06104950	3.43744695		69.00000000	0.49768116	4.50951362	1.495771
70	0.38949296	9.05749990	3.52783245		70.00000000	0.49057143	4.44335067	1.517152
71	0.39933643	9.05690860	3.61675355		71.00000000	0.48366197	4.38048227	1.538619
72	0.40947238	9.06096740	3.71021589		72.00000000	0.47694444	4.32157806	1.560006
73	0.41927192	9.06614970	3.80118199		73.00000000	0.47041096	4.26481617	1.581389
74	0.42945400	9.04656310	3.88508271		74.00000000	0.46405405	4.19809428	1.602756
75	0.43924761	9.05913830	3.97920485		75.00000000	0.45786667	4.14787746	1.624236
76	0.44941777	9.04253480	4.06387582		76.00000000	0.45184211	4.08579796	1.645618
77	0.45955297	9.04249950	4.15550750		77.00000000	0.44597403	4.03271991	1.667004
78	0.46942621	9.03672700	4.24207651		78.00000000	0.44025641	3.97847699	1.688336
79	0.47954056	9.02287010	4.32683218		79.00000000	0.43468354	3.92209315	1.709811
80	0.48936543	9.00441740	4.40645059		80.00000000	0.42925000	3.86514617	1.731182
81	0.49947384	9.00083450	4.49568137		81.00000000	0.42395062	3.81590934	1.752565
82	0.50930911	8.96982860	4.56841542		82.00000000	0.41878049	3.75638920	1.774059
83	0.51945472	8.93986700	4.64385611		83.00000000	0.41373494	3.69873533	1.795437
84	0.52924979	8.90601540	4.71350678		84.00000000	0.40880952	3.64086391	1.816788
85	0.53937608	8.84905340	4.77296773		85.00000000	0.40400000	3.57501757	1.838158
86	0.54951423	8.77240660	4.82056226		86.00000000	0.39930233	3.50284236	1.859638
87	0.55934656	8.66565510	4.84710437		87.00000000	0.39471264	3.42044363	1.881024
88	0.56948549	8.53446100	4.86025170		88.00000000	0.39022727	3.33037944	1.902365
89	0.57927758	8.32633110	4.82325693		89.00000000	0.38584270	3.21265404	1.923733
90	0.58942395	8.06349090	4.75281466		90.00000000	0.38155556	3.07666975	1.945227
91	0.59922498	7.69888400	4.61336361		91.00000000	0.37736264	2.90527117	1.966610
92	0.60932374	7.20100690	4.38774446		92.00000000	0.37326087	2.68785410	1.988078
93	0.61911803	6.56777910	4.06623046		93.00000000	0.36924731	2.42513478	2.009491
94	0.62924284	5.70699740	3.59108725		94.00000000	0.36531915	2.08487543	2.030990
95	0.63937801	4.63053940	2.96066507		95.00000000	0.36147368	1.67381814	2.052367
96	0.64910835	3.29284380	2.13741241		96.00000000	0.35770833	1.17787767	2.073725
97	0.65929192	1.60517060	1.05827601		97.00000000	0.35402062	0.56826349	2.095098
98	0.66901481	-0.37485415	-0.25078298		98.00000000	0.35040816	-0.13135195	2.116572
99	0.67907339	-2.79457190	-1.89771941		99.00000000	0.34686869	-0.96934949	2.137947
100	0.68876576	-5.57879590	-3.84248360		100.00000000	0.34340000	-1.91575851	2.159290
101	0.69906992	-8.93086720	-6.24330062		101.00000000	0.34000000	-3.03649485	2.180661
10:35 04/04/2018
Test Lot:	JK-PERC
Recipe:	Recipe_YJX-LID
Cell Name:	3-12-12h
Test Order:	4
Test Condition:	Light
1	-0.29993081	9.06744770	-2.71960693		1.00000000	34.34000000	311.37615402	0.000000
2	-0.29011610	9.08510780	-2.63573604		2.00000000	17.17000000	155.99130093	0.061783
3	-0.27997985	9.07322690	-2.54032071		3.00000000	11.44666667	103.85820392	0.083202
4	-0.27016068	9.07207490	-2.45091792		4.00000000	8.58500000	77.88376302	0.104690
5	-0.25999764	9.07559010	-2.35963201		5.00000000	6.86800000	62.33115281	0.126086
6	-0.24985468	9.07864570	-2.26834212		6.00000000	5.72333333	51.96011556	0.147435
7	-0.24000201	9.08727070	-2.18096323		7.00000000	4.90571429	44.57955369	0.168805
8	-0.22989181	9.07490250	-2.08624576		8.00000000	4.29250000	38.95401898	0.190310
9	-0.22003093	9.07986550	-1.99785125		9.00000000	3.81555556	34.64473125	0.211691
10	-0.20988576	9.06922150	-1.90350045		10.00000000	3.43400000	31.14370663	0.233058
11	-0.20005690	9.07265090	-1.81504641		11.00000000	3.12181818	28.32316654	0.254493
12	-0.18993405	9.07271580	-1.72321766		12.00000000	2.86166667	25.96308838	0.275989
13	-0.18013570	9.07808300	-1.63528684		13.00000000	2.64153846	23.98010540	0.297380
14	-0.16997489	9.07769970	-1.54298101		14.00000000	2.45285714	22.26630055	0.318733
15	-0.16021524	9.07390790	-1.45377833		15.00000000	2.28933333	20.77319982	0.340108
16	-0.15008494	9.07408620	-1.36188368		16.00000000	2.14625000	19.47525751	0.361574
17	-0.13986237	9.06704710	-1.26813870		17.00000000	2.02000000	18.31543514	0.382953
18	-0.13009082	9.07293320	-1.18030532		18.00000000	1.90777778	17.30914034	0.404316
19	-0.11991438	9.07780460	-1.08855931		19.00000000	1.80736842	16.40693737	0.425687
20	-0.11010487	9.08438680	-1.00023523		20.00000000	1.71700000	15.59789214	0.447170
21	-0.09997159	9.07451150	-0.90719336		21.00000000	1.63523810	14.83898690	0.468545
22	-0.09015092	9.07924650	-0.81850238		22.00000000	1.56090909	14.17187840	0.489949
23	-0.07997076	9.07765100	-0.72594660		23.00000000	1.49304348	13.55332762	0.511297
24	-0.07016943	9.07918830	-0.63708150		24.00000000	1.43083333	12.99080526	0.532767
25	-0.06005030	9.07498260	-0.54495544		25.00000000	1.37360000	12.46539610	0.554168
26	-0.04988875	9.08331870	-0.45315541		26.00000000	1.32076923	11.99696785	0.575552
27	-0.04005914	9.07297330	-0.36345553		27.00000000	1.27185185	11.53947789	0.597035
28	-0.02989536	9.07915500	-0.27142459		28.00000000	1.22642857	11.13493510	0.618418
29	-0.02007245	9.08321480	-0.18232237		29.00000000	1.18413793	10.75577918	0.639764
30	-0.00993173	9.06926630	-0.09007355		30.00000000	1.14466667	10.38128682	0.661190
31	-0.00065289	9.07581520	-0.00592551		31.00000000	1.10774194	10.05366110	0.682794
32	0.00949580	9.07420830	0.08616689		32.00000000	1.07312500	9.73775978	0.704184
33	0.01929164	9.07219510	0.17501749		33.00000000	1.04060606	9.44058120	0.725539
34	0.02948714	9.06277470	0.26723528		34.00000000	1.01000000	9.15340245	0.746918
35	0.03929712	9.08434680	0.35698862		35.00000000	0.98114286	8.91304197	0.768406
36	0.04942191	9.06711200	0.44811399		36.00000000	0.95388889	8.64901739	0.789803
37	0.05922519	9.07577320	0.53751436		37.00000000	0.92810811	8.42329869	0.811160
38	0.06940431	9.07735920	0.63000786		38.00000000	0.90368421	8.20306618	0.832531
39	0.07954101	9.07364560	0.72172696		39.00000000	0.88051282	7.98946128	0.854018
40	0.08937704	9.07891940	0.81144692		40.00000000	0.85850000	7.79425230	0.875449
41	0.09950928	9.06888580	0.90243826		41.00000000	0.83756098	7.59574484	0.896817
42	0.10931107	9.07156940	0.99162296		42.00000000	0.81761905	7.41708793	0.918191
43	0.11947605	9.07449150	1.08418440		43.00000000	0.79860465	7.24693112	0.939676
44	0.12927933	9.06225200	1.17156187		44.00000000	0.78045455	7.07267577	0.961064
45	0.13945772	9.08197310	1.26655126		45.00000000	0.76311111	6.93055458	0.982418
46	0.14924982	9.06711860	1.35326582		46.00000000	0.74652174	6.76880115	1.003798
47	0.15939993	9.08024790	1.44739088		47.00000000	0.73063830	6.63437687	1.025277
48	0.16954705	9.06602380	1.53711759		48.00000000	0.71541667	6.48598453	1.046661
49	0.17937934	9.07701490	1.62822894		49.00000000	0.70081633	6.36132024	1.068036
50	0.18951456	9.06338410	1.71764325		50.00000000	0.68680000	6.22473220	1.089411
51	0.19930966	9.07043650	1.80782561		51.00000000	0.67333333	6.10742724	1.110895
52	0.20947538	9.07233240	1.90043028		52.00000000	0.66038462	5.99122874	1.132269
53	0.21923624	9.07842060	1.99031880		53.00000000	0.64792453	5.88213138	1.153656
54	0.22941537	9.06640630	2.07997296		54.00000000	0.63592593	5.76556282	1.175005
55	0.23922013	9.08230880	2.17267109		55.00000000	0.62436364	5.67066335	1.196485
56	0.24940224	9.07985880	2.26453712		56.00000000	0.61321429	5.56789913	1.217863
57	0.25952405	9.05570890	2.35017425		57.00000000	0.60245614	5.45566743	1.239264
58	0.26933998	9.08206180	2.44616234		58.00000000	0.59206897	5.37720693	1.260747
59	0.27950346	9.06615540	2.53402180		59.00000000	0.58203390	5.27680977	1.282125
60	0.28933206	9.07141970	2.62465255		60.00000000	0.57233333	5.19187587	1.303476
61	0.29946059	9.06898590	2.71580387		61.00000000	0.56295082	5.10539305	1.324865
62	0.30927205	9.06853390	2.80464407		62.00000000	0.55387097	5.02279765	1.346347
63	0.31945190	9.07993700	2.90060313		63.00000000	0.54507937	4.94928629	1.367732
64	0.32927603	9.05868050	2.98280635		64.00000000	0.53656250	4.86054826	1.389090
65	0.33942464	9.06421470	3.07661781		65.00000000	0.52830769	4.78869435	1.410472
66	0.34923908	9.06755450	3.16674439		66.00000000	0.52030303	4.71787608	1.431950
67	0.35938621	9.04711060	3.25140679		67.00000000	0.51253731	4.63698176	1.453346
68	0.36953557	9.08614730	3.35765462		68.00000000	0.50500000	4.58850439	1.474709
69	0.37935671	9.05524440	3.43516772		69.00000000	0.49768116	4.50662453	1.496099
70	0.38953805	9.07370380	3.53455288		70.00000000	0.49057143	4.45129984	1.517587
71	0.39936143	9.05655770	3.61683983		71.00000000	0.48366197	4.38031256	1.538968
72	0.40950260	9.05184360	3.70675349		72.00000000	0.47694444	4.31722652	1.560335
73	0.41930664	9.05213070	3.79561851		73.00000000	0.47041096	4.25822148	1.581714
74	0.42946342	9.04927160	3.88633113		74.00000000	0.46405405	4.19935117	1.603201
75	0.43924809	9.05116750	3.97570804		75.00000000	0.45786667	4.14422789	1.624586
76	0.44939968	9.03605080	4.06079834		76.00000000	0.45184211	4.08286822	1.645939
77	0.45957658	9.03864770	4.15395080		77.00000000	0.44597403	4.03100210	1.667317
78	0.46942452	9.03373240	4.24065550		78.00000000	0.44025641	3.97715860	1.688789
79	0.47954854	9.02073860	4.32588203		79.00000000	0.43468354	3.92116663	1.710168
80	0.48934513	9.00326540	4.40570408		80.00000000	0.42925000	3.86465167	1.731528
81	0.49951756	8.99432370	4.49282263		81.00000000	0.42395062	3.81314908	1.752915
82	0.50933427	8.97129150	4.56938621		82.00000000	0.41878049	3.75700183	1.774400
83	0.51943147	8.94494530	4.64628609		83.00000000	0.41373494	3.70083640	1.795774
84	0.52925116	8.90858840	4.71488074		84.00000000	0.40880952	3.64191578	1.817171
85	0.53938341	8.85056300	4.77384685		85.00000000	0.40400000	3.57562745	1.838516
86	0.54953718	8.76445870	4.81639592		86.00000000	0.39930233	3.49966874	1.859984
87	0.55932260	8.65639590	4.84171786		87.00000000	0.39471264	3.41678891	1.881361
88	0.56947345	8.51770020	4.85060412		88.00000000	0.39022727	3.32383892	1.902750
89	0.57929909	8.32378960	4.82196374		89.00000000	0.38584270	3.21167343	1.924244
90	0.58939928	8.04370500	4.74095394		90.00000000	0.38155556	3.06912033	1.945625
91	0.59920633	7.68942360	4.60755130		91.00000000	0.37736264	2.90170117	1.966968
92	0.60933036	7.16839840	4.36792278		92.00000000	0.37326087	2.67568262	1.988454
93	0.61913514	6.56021790	4.06166143		93.00000000	0.36924731	2.42234282	2.009945
94	0.62926364	5.67721180	3.57246296		94.00000000	0.36531915	2.07399418	2.031331
95	0.63938248	4.60727980	2.94581398		95.00000000	0.36147368	1.66541040	2.052692
96	0.64916420	3.26844570	2.12175794		96.00000000	0.35770833	1.16915026	2.074069
97	0.65926588	1.59035340	1.04846573		97.00000000	0.35402062	0.56301789	2.095566
98	0.66902155	-0.38472345	-0.25738828		98.00000000	0.35040816	-0.13481024	2.116958
99	0.67908752	-2.79737140	-1.89966001		99.00000000	0.34686869	-0.97032054	2.138318
100	0.68879855	-5.54892640	-3.82209246		100.00000000	0.34340000	-1.90550133	2.159692
101	0.69910342	-8.87347890	-6.20347945		101.00000000	0.34000000	-3.01698283	2.181168
