# Supplementary material for: Study on the Electrical Injection Regeneration of Industrialized B-Doped Czochralski Silicon PERC Solar Cells
Source: Hindawi journal article supplement (doi:10.1155/2019/5357370), 2019-06-20
Supplement: f1 [file 5357370.f1.zip › section3.3/IVRawData_3-14-2.5h.csv]

00:01 04/04/2018
Test Lot:	JK-PERC
Recipe:	Recipe_YJX-LID
Cell Name:	3-14-2.5h
Test Order:	2
Test Condition:	Light
1	-0.29994860	9.09181310	-2.72707661		1.00000000	34.34000000	312.21286185	0.000000
2	-0.29009840	9.11521820	-2.64431022		2.00000000	17.17000000	156.50829649	0.061783
3	-0.27995121	9.09819510	-2.54705073		3.00000000	11.44666667	104.14400658	0.083197
4	-0.27015084	9.10115720	-2.45868526		4.00000000	8.58500000	78.13343456	0.104684
5	-0.25997984	9.09845540	-2.36541498		5.00000000	6.86800000	62.48819169	0.126114
6	-0.24980140	9.10320380	-2.27399305		6.00000000	5.72333333	52.10066975	0.147477
7	-0.23998095	9.10890480	-2.18596363		7.00000000	4.90571429	44.68568440	0.168859
8	-0.22984120	9.11413960	-2.09480478		8.00000000	4.29250000	39.12244423	0.190351
9	-0.22004755	9.10228060	-2.00293455		9.00000000	3.81555556	34.73025731	0.211730
10	-0.20986612	9.09916500	-1.90960645		10.00000000	3.43400000	31.24653261	0.233085
11	-0.20006651	9.10912320	-1.82243049		11.00000000	3.12181818	28.43702643	0.254458
12	-0.18989030	9.10525610	-1.72899981		12.00000000	2.86166667	26.05620787	0.275936
13	-0.18011226	9.09105400	-1.63741028		13.00000000	2.64153846	24.01436880	0.297323
14	-0.16995317	9.12391000	-1.55063743		14.00000000	2.45285714	22.37964781	0.318669
15	-0.16014016	9.09623910	-1.45667318		15.00000000	2.28933333	20.82432338	0.340036
16	-0.15001158	9.10981080	-1.36657711		16.00000000	2.14625000	19.55193143	0.361511
17	-0.13982049	9.10637470	-1.27325777		17.00000000	2.02000000	18.39487689	0.382894
18	-0.13002756	9.09957890	-1.18319604		18.00000000	1.90777778	17.35997441	0.404245
19	-0.11989303	9.10944840	-1.09215937		19.00000000	1.80736842	16.46412937	0.425609
20	-0.11006067	9.10226920	-1.00180185		20.00000000	1.71700000	15.62859622	0.447087
21	-0.09987106	9.10429000	-0.90925511		21.00000000	1.63523810	14.88768184	0.468455
22	-0.09008559	9.10581020	-0.82030227		22.00000000	1.56090909	14.21334192	0.489842
23	-0.07995701	9.10131740	-0.72771411		23.00000000	1.49304348	13.58866259	0.511184
24	-0.07014102	9.10491560	-0.63862804		24.00000000	1.43083333	13.02761674	0.532649
25	-0.05998862	9.10509300	-0.54620198		25.00000000	1.37360000	12.50675574	0.554023
26	-0.04983251	9.10136600	-0.45354389		26.00000000	1.32076923	12.02080417	0.575404
27	-0.04000163	9.10525990	-0.36422525		27.00000000	1.27185185	11.58054167	0.596881
28	-0.02989017	9.10119920	-0.27203641		28.00000000	1.22642857	11.16197073	0.618251
29	-0.02002209	9.09555150	-0.18211191		29.00000000	1.18413793	10.77038753	0.639603
30	-0.00989872	9.11515430	-0.09022832		30.00000000	1.14466667	10.43381329	0.660987
31	-0.00062082	9.10039620	-0.00564973		31.00000000	1.10774194	10.08089050	0.682585
32	0.00951946	9.10023590	0.08662929		32.00000000	1.07312500	9.76569065	0.703959
33	0.01929498	9.09956840	0.17557596		33.00000000	1.04060606	9.46906603	0.725310
34	0.02944262	9.10579680	0.26809848		34.00000000	1.01000000	9.19685477	0.746679
35	0.03931563	9.10684870	0.35804152		35.00000000	0.98114286	8.93511955	0.768150
36	0.04939257	9.09869380	0.44940787		36.00000000	0.95388889	8.67914292	0.789530
37	0.05924624	9.09635930	0.53892504		37.00000000	0.92810811	8.44240482	0.810894
38	0.06942216	9.09566310	0.63144054		38.00000000	0.90368421	8.21960713	0.832268
39	0.07955938	9.10608580	0.72447452		39.00000000	0.88051282	8.01802529	0.853746
40	0.08940039	9.09701350	0.81327654		40.00000000	0.85850000	7.80978609	0.875124
41	0.09956812	9.11162850	0.90722773		41.00000000	0.83756098	7.63154446	0.896483
42	0.10937119	9.10106370	0.99539417		42.00000000	0.81761905	7.44120303	0.917859
43	0.11948682	9.09957700	1.08727952		43.00000000	0.79860465	7.26696452	0.939339
44	0.12931891	9.10220050	1.17708665		44.00000000	0.78045455	7.10385375	0.960716
45	0.13945761	9.10078050	1.26917310		45.00000000	0.76311111	6.94490672	0.982061
46	0.14929044	9.10417840	1.35916680		46.00000000	0.74652174	6.79646709	1.003422
47	0.15945669	9.10276130	1.45149619		47.00000000	0.73063830	6.65082602	1.024898
48	0.16957976	9.10472870	1.54397771		48.00000000	0.71541667	6.51367466	1.046283
49	0.17940664	9.09865090	1.63235839		49.00000000	0.70081633	6.37648310	1.067650
50	0.18955278	9.09062480	1.72315320		50.00000000	0.68680000	6.24344111	1.089023
51	0.19932310	9.11769290	1.81736681		51.00000000	0.67333333	6.13924655	1.110501
52	0.20950721	9.10703850	1.90799023		52.00000000	0.66038462	6.01414812	1.131939
53	0.21931994	9.09414290	1.99452688		53.00000000	0.64792453	5.89231825	1.153327
54	0.22944228	9.10438350	2.08893051		54.00000000	0.63592593	5.78971351	1.174682
55	0.23927139	9.10272310	2.17802121		55.00000000	0.62436364	5.68340930	1.196151
56	0.24941158	9.10572720	2.27107381		56.00000000	0.61321429	5.58376200	1.217528
57	0.25956890	9.10220720	2.36264991		57.00000000	0.60245614	5.48368062	1.238905
58	0.26937419	9.10404780	2.45239550		58.00000000	0.59206897	5.39022416	1.260378
59	0.27953151	9.10519600	2.54518919		59.00000000	0.58203390	5.29953272	1.281765
60	0.28933382	9.11402800	2.63699654		60.00000000	0.57233333	5.21626203	1.303113
61	0.29949114	9.09688470	2.72443637		61.00000000	0.56295082	5.12109870	1.324490
62	0.30932620	9.10284810	2.81574941		62.00000000	0.55387097	5.04180329	1.345980
63	0.31946713	9.09638600	2.90599633		63.00000000	0.54507937	4.95825231	1.367351
64	0.32928881	9.09862230	2.99607451		64.00000000	0.53656250	4.88197953	1.388707
65	0.33941114	9.09677310	3.08754613		65.00000000	0.52830769	4.80589520	1.410076
66	0.34923205	9.09082700	3.17480815		66.00000000	0.52030303	4.72998484	1.431548
67	0.35939309	9.10283280	3.27149521		67.00000000	0.51253731	4.66554147	1.452932
68	0.36956304	9.09224700	3.36015844		68.00000000	0.50500000	4.59158474	1.474276
69	0.37936908	9.08176140	3.44533947		69.00000000	0.49768116	4.51982154	1.495649
70	0.38952193	9.11387630	3.55005469		70.00000000	0.49057143	4.47100732	1.517124
71	0.39934808	9.09378240	3.63158454		71.00000000	0.48366197	4.39831673	1.538486
72	0.40951058	9.10916140	3.73029797		72.00000000	0.47694444	4.34456392	1.559853
73	0.41930100	9.08689690	3.81014496		73.00000000	0.47041096	4.27457588	1.581230
74	0.42948213	9.10155770	3.90895639		74.00000000	0.46405405	4.22361475	1.602708
75	0.43928221	9.08815860	3.99226639		75.00000000	0.45786667	4.16116488	1.624097
76	0.44942909	9.09419630	4.08719637		76.00000000	0.45184211	4.10914080	1.645441
77	0.45959759	9.09394260	4.17955410		77.00000000	0.44597403	4.05566219	1.666814
78	0.46944901	9.08999060	4.26728709		78.00000000	0.44025641	4.00192663	1.688302
79	0.47957805	9.07218650	4.35082151		79.00000000	0.43468354	3.94353018	1.709667
80	0.48939896	9.08907600	4.44818434		80.00000000	0.42925000	3.90148587	1.731016
81	0.49953321	9.06212520	4.52683249		81.00000000	0.42395062	3.84189357	1.752384
82	0.50934815	9.04552080	4.60731929		82.00000000	0.41878049	3.78808761	1.773856
83	0.51951218	9.03847120	4.69559588		83.00000000	0.41373494	3.73953134	1.795243
84	0.52930260	9.00974460	4.76888124		84.00000000	0.40880952	3.68326940	1.816632
85	0.53940260	8.96241950	4.83435238		85.00000000	0.40400000	3.62081748	1.837978
86	0.54958153	8.89934920	4.89091795		86.00000000	0.39930233	3.55353083	1.859437
87	0.55939794	8.82939240	4.93914392		87.00000000	0.39471264	3.48507282	1.880819
88	0.56951135	8.70778850	4.95918438		88.00000000	0.39022727	3.39801656	1.902196
89	0.57932264	8.56346130	4.96100701		89.00000000	0.38584270	3.30414900	1.923683
90	0.58940774	8.31489850	4.90086553		90.00000000	0.38155556	3.17259572	1.945059
91	0.59924579	8.04225540	4.81928769		91.00000000	0.37736264	3.03484671	1.966406
92	0.60937405	7.59654380	4.62913666		92.00000000	0.37326087	2.83549254	1.987885
93	0.61912727	7.03546950	4.35585102		93.00000000	0.36924731	2.59782820	2.009383
94	0.62926966	6.25465150	3.93586242		94.00000000	0.36531915	2.28494396	2.030751
95	0.63940692	5.23551320	3.34762337		95.00000000	0.36147368	1.89250025	2.052119
96	0.64920104	3.95413300	2.56702726		96.00000000	0.35770833	1.41442633	2.073499
97	0.65928394	2.28478050	1.50631909		97.00000000	0.35402062	0.80885941	2.094968
98	0.66899025	0.27606916	0.18468758		98.00000000	0.35040816	0.09673689	2.116333
99	0.67910212	-2.22933720	-1.51394762		99.00000000	0.34686869	-0.77328727	2.137724
100	0.68881887	-5.12781050	-3.53213263		100.00000000	0.34340000	-1.76089013	2.159113
101	0.69904244	-8.68277930	-6.06963123		101.00000000	0.34000000	-2.95214496	2.180585
00:01 04/04/2018
Test Lot:	JK-PERC
Recipe:	Recipe_YJX-LID
Cell Name:	3-14-2.5h
Test Order:	3
Test Condition:	Light
1	-0.29991364	9.10932540	-2.73201094		1.00000000	34.34000000	312.81423424	0.000000
2	-0.29004854	9.10643480	-2.64130812		2.00000000	17.17000000	156.35748552	0.021601
3	-0.27994153	9.09810640	-2.54693783		3.00000000	11.44666667	104.14299126	0.043011
4	-0.27011734	9.10679150	-2.45990230		4.00000000	8.58500000	78.18180503	0.064374
5	-0.26000068	9.10215190	-2.36656568		5.00000000	6.86800000	62.51357925	0.085747
6	-0.24986169	9.10191820	-2.27422066		6.00000000	5.72333333	52.09331183	0.107234
7	-0.24001443	9.10355760	-2.18498519		7.00000000	4.90571429	44.65945257	0.128608
8	-0.22985609	9.10998440	-2.09398539		8.00000000	4.29250000	39.10460804	0.149950
9	-0.22000214	9.09682660	-2.00132132		9.00000000	3.81555556	34.70944727	0.171336
10	-0.20987059	9.11247250	-1.91243998		10.00000000	3.43400000	31.29223057	0.192820
11	-0.20003673	9.09050180	-1.81843425		11.00000000	3.12181818	28.37889380	0.214191
12	-0.18987541	9.08961870	-1.72589508		12.00000000	2.86166667	26.01145885	0.235540
13	-0.18011002	9.10770320	-1.64038861		13.00000000	2.64153846	24.05834830	0.256908
14	-0.16995466	9.11621950	-1.54934399		14.00000000	2.45285714	22.36078412	0.278384
15	-0.16013941	9.09278960	-1.45611396		15.00000000	2.28933333	20.81642632	0.299755
16	-0.14997883	9.09955220	-1.36474019		16.00000000	2.14625000	19.52991391	0.321111
17	-0.13981676	9.10524460	-1.27306580		17.00000000	2.02000000	18.39259409	0.342490
18	-0.13000152	9.08832550	-1.18149613		18.00000000	1.90777778	17.33850543	0.363975
19	-0.11986549	9.10786340	-1.09171851		19.00000000	1.80736842	16.46126469	0.385341
20	-0.11004504	9.09471890	-1.00082871		20.00000000	1.71700000	15.61563235	0.406696
21	-0.09987553	9.09826660	-0.90869415		21.00000000	1.63523810	14.87783214	0.428070
22	-0.09006400	9.10422520	-0.81996297		22.00000000	1.56090909	14.21086788	0.449556
23	-0.07995106	9.10157110	-0.72768021		23.00000000	1.49304348	13.58904137	0.470945
24	-0.07009859	9.09796140	-0.63775430		24.00000000	1.43083333	13.01766644	0.492326
25	-0.05996778	9.09023480	-0.54512122		25.00000000	1.37360000	12.48634652	0.513677
26	-0.04981762	9.10660650	-0.45366948		26.00000000	1.32076923	12.02772566	0.535147
27	-0.04002024	9.10680010	-0.36445632		27.00000000	1.27185185	11.58250057	0.556516
28	-0.02988273	9.09220890	-0.27170001		28.00000000	1.22642857	11.15094477	0.577908
29	-0.02003548	9.10000230	-0.18232292		29.00000000	1.18413793	10.77565790	0.599375
30	-0.00991509	9.09699340	-0.09019750		30.00000000	1.14466667	10.41302511	0.620825
31	-0.00063050	9.09885120	-0.00573681		31.00000000	1.10774194	10.07917904	0.642321
32	0.00950085	9.09688000	0.08642808		32.00000000	1.07312500	9.76208935	0.663703
33	0.01932102	9.10977750	0.17601023		33.00000000	1.04060606	9.47968968	0.685050
34	0.02945378	9.09475710	0.26787497		34.00000000	1.01000000	9.18570467	0.706554
35	0.03929628	9.11812880	0.35830855		35.00000000	0.98114286	8.94618694	0.727939
36	0.04941564	9.08951190	0.44916406		36.00000000	0.95388889	8.67038441	0.749340
37	0.05924475	9.10330870	0.53932323		37.00000000	0.92810811	8.44885462	0.770715
38	0.06942365	9.10731220	0.63226282		38.00000000	0.90368421	8.23013424	0.792203
39	0.07957798	9.09730910	0.72394550		39.00000000	0.88051282	8.01029729	0.813589
40	0.08938178	9.10586740	0.81389867		40.00000000	0.85850000	7.81738716	0.834984
41	0.09953240	9.10291670	0.90603517		41.00000000	0.83756098	7.62424779	0.856320
42	0.10935704	9.10566710	0.99576880		42.00000000	0.81761905	7.44496686	0.877789
43	0.11951882	9.09714510	1.08728005		43.00000000	0.79860465	7.26502239	0.899162
44	0.12934570	9.10264970	1.17738860		44.00000000	0.78045455	7.10420433	0.920543
45	0.13951194	9.09168340	1.26839839		45.00000000	0.76311111	6.93796462	0.942038
46	0.14928821	9.10926820	1.35990634		46.00000000	0.74652174	6.80026674	0.963415
47	0.15947008	9.09784790	1.45083453		47.00000000	0.73063830	6.64723610	0.984761
48	0.16959316	9.09449860	1.54236476		48.00000000	0.71541667	6.50635587	1.006140
49	0.17944832	9.10973260	1.63472621		49.00000000	0.70081633	6.38424934	1.027623
50	0.18958032	9.09307480	1.72386803		50.00000000	0.68680000	6.24512377	1.049007
51	0.19933724	9.10452560	1.81487100		51.00000000	0.67333333	6.13038057	1.070375
52	0.20949382	9.09753420	1.90587719		52.00000000	0.66038462	6.00787162	1.091749
53	0.21930803	9.10979940	1.99785216		53.00000000	0.64792453	5.90246248	1.113229
54	0.22945642	9.10005280	2.08806554		54.00000000	0.63592593	5.78695950	1.134618
55	0.23927437	9.10343550	2.17821879		55.00000000	0.62436364	5.68385409	1.155963
56	0.24941753	9.10441680	2.27080115		56.00000000	0.61321429	5.58295844	1.177342
57	0.25960016	9.09499550	2.36106229		57.00000000	0.60245614	5.47933589	1.198820
58	0.26940471	9.10105230	2.45186636		58.00000000	0.59206897	5.38845062	1.220202
59	0.27953374	9.08721070	2.54018199		59.00000000	0.58203390	5.28906467	1.241571
60	0.28935987	9.09931470	2.63297652		60.00000000	0.57233333	5.20784111	1.262955
61	0.29950228	9.12050530	2.73161213		61.00000000	0.56295082	5.13439593	1.284443
62	0.30930310	9.09009930	2.81159589		62.00000000	0.55387097	5.03474210	1.305828
63	0.31946936	9.10747430	2.90955899		63.00000000	0.54507937	4.96429631	1.327178
64	0.32931039	9.09183030	2.99403418		64.00000000	0.53656250	4.87833520	1.348554
65	0.33942676	9.10869120	3.09173354		65.00000000	0.52830769	4.81219163	1.370022
66	0.34926033	9.09615710	3.17692683		66.00000000	0.52030303	4.73275810	1.391399
67	0.35941467	9.09748940	3.26977115		67.00000000	0.51253731	4.66280278	1.412764
68	0.36957049	9.09643750	3.36177486		68.00000000	0.50500000	4.59370094	1.434136
69	0.37936834	9.10611060	3.45457006		69.00000000	0.49768116	4.53193968	1.455623
70	0.38953161	9.10789300	3.54781222		70.00000000	0.49057143	4.46807208	1.477008
71	0.39935550	9.09396930	3.63172666		71.00000000	0.48366197	4.39840712	1.498398
72	0.40947786	9.09628580	3.72472764		72.00000000	0.47694444	4.33842298	1.519757
73	0.41933674	9.10322670	3.81731741		73.00000000	0.47041096	4.28225760	1.541233
74	0.42946574	9.09290790	3.90509242		74.00000000	0.46405405	4.21960077	1.562603
75	0.43929857	9.09051800	3.99345156		75.00000000	0.45786667	4.16224517	1.583981
76	0.44945365	9.08844570	4.08483509		76.00000000	0.45184211	4.10654244	1.605476
77	0.45958865	9.08923340	4.17730851		77.00000000	0.44597403	4.05356201	1.626849
78	0.46947357	9.08513930	4.26523278		78.00000000	0.44025641	3.99979081	1.648192
79	0.47959590	9.07705690	4.35331927		79.00000000	0.43468354	3.94564727	1.669577
80	0.48943543	9.07989690	4.44402324		80.00000000	0.42925000	3.89754574	1.691059
81	0.49954736	9.06106380	4.52643050		81.00000000	0.42395062	3.84144359	1.712448
82	0.50938016	9.06261060	4.61631404		82.00000000	0.41878049	3.79524449	1.733814
83	0.51951218	9.02429390	4.68823060		83.00000000	0.41373494	3.73366569	1.755188
84	0.52931821	9.00095460	4.76436918		84.00000000	0.40880952	3.67967596	1.776660
85	0.53943759	8.96469210	4.83589190		85.00000000	0.40400000	3.62173561	1.798047
86	0.54957557	8.90406230	4.89345511		86.00000000	0.39930233	3.55541278	1.819410
87	0.55938083	8.82074740	4.93415700		87.00000000	0.39471264	3.48166053	1.840798
88	0.56952924	8.71489330	4.96338656		88.00000000	0.39022727	3.40078904	1.862269
89	0.57934344	8.54569910	4.95089471		89.00000000	0.38584270	3.29729559	1.883644
90	0.58946651	8.32869530	4.90948695		90.00000000	0.38155556	3.17785996	1.905009
91	0.59925544	8.01366520	4.80223247		91.00000000	0.37736264	3.02405783	1.926380
92	0.60936439	7.58828350	4.62402975		92.00000000	0.37326087	2.83240930	1.947853
93	0.61917710	7.01311210	4.34235841		93.00000000	0.36924731	2.58957279	1.969242
94	0.62928981	6.22910980	3.91991532		94.00000000	0.36531915	2.27561309	1.990704
95	0.63941735	5.19718980	3.32317333		95.00000000	0.36147368	1.87864734	2.012158
96	0.64920998	3.93336010	2.55357663		96.00000000	0.35770833	1.40699569	2.033675
97	0.65930772	2.23855500	1.47589659		97.00000000	0.35402062	0.79249463	2.055057
98	0.66902596	0.28019485	0.18745763		98.00000000	0.35040816	0.09818256	2.076473
99	0.67910063	-2.23010490	-1.51446564		99.00000000	0.34686869	-0.77355356	2.097846
100	0.68879354	-5.09248970	-3.50767401		100.00000000	0.34340000	-1.74876096	2.119336
101	0.69907743	-8.61132530	-6.01998316		101.00000000	0.34000000	-2.92785060	2.140720
00:01 04/04/2018
Test Lot:	JK-PERC
Recipe:	Recipe_YJX-LID
Cell Name:	3-14-2.5h
Test Order:	4
Test Condition:	Light
1	-0.29994658	9.10553170	-2.73117309		1.00000000	34.34000000	312.68395858	0.000000
2	-0.29009184	9.10109620	-2.64015374		2.00000000	17.17000000	156.26582175	0.061785
3	-0.27994013	9.10345460	-2.54842226		3.00000000	11.44666667	104.20421032	0.083193
4	-0.27013227	9.10004330	-2.45821535		4.00000000	8.58500000	78.12387173	0.104685
5	-0.25993517	9.09841920	-2.36499914		5.00000000	6.86800000	62.48794307	0.126126
6	-0.24981397	9.11487290	-2.27702259		6.00000000	5.72333333	52.16745590	0.147492
7	-0.23995104	9.10149670	-2.18391360		7.00000000	4.90571429	44.64934238	0.168883
8	-0.22983952	9.10749150	-2.09326147		8.00000000	4.29250000	39.09390726	0.190367
9	-0.22001158	9.09620090	-2.00126953		9.00000000	3.81555556	34.70705988	0.211749
10	-0.20986433	9.09383960	-1.90847255		10.00000000	3.43400000	31.22824519	0.233108
11	-0.20002671	9.10621260	-1.82148575		11.00000000	3.12181818	28.42794006	0.254481
12	-0.18989584	9.09999280	-1.72805078		12.00000000	2.86166667	26.04114606	0.275952
13	-0.18009765	9.11838910	-1.64220045		13.00000000	2.64153846	24.08657551	0.297336
14	-0.16995563	9.10081390	-1.54673456		14.00000000	2.45285714	22.32299638	0.318694
15	-0.16015148	9.09961890	-1.45731743		15.00000000	2.28933333	20.83206087	0.340067
16	-0.14998786	9.10974120	-1.36635059		16.00000000	2.14625000	19.55178205	0.361552
17	-0.13985625	9.10149190	-1.27290053		17.00000000	2.02000000	18.38501364	0.382934
18	-0.13003425	9.10057070	-1.18338589		18.00000000	1.90777778	17.36186655	0.404275
19	-0.11989669	9.10411360	-1.09155309		19.00000000	1.80736842	16.45448742	0.425669
20	-0.11007915	9.10653500	-1.00243963		20.00000000	1.71700000	15.63592060	0.447148
21	-0.09990735	9.11153510	-0.91030936		21.00000000	1.63523810	14.89952930	0.468532
22	-0.09007940	9.09534170	-0.81930296		22.00000000	1.56090909	14.19700154	0.489894
23	-0.07996193	9.11581230	-0.72891797		23.00000000	1.49304348	13.61030410	0.511253
24	-0.07015631	9.09622480	-0.63815753		24.00000000	1.43083333	13.01518165	0.532717
25	-0.06002842	9.10050010	-0.54628860		25.00000000	1.37360000	12.50044694	0.554104
26	-0.04980824	9.12157540	-0.45432960		26.00000000	1.32076923	12.04749612	0.575473
27	-0.04002866	9.10973930	-0.36465067		27.00000000	1.27185185	11.58623880	0.596830
28	-0.02987696	9.09736920	-0.27180169		28.00000000	1.22642857	11.15727351	0.618314
29	-0.02006017	9.11889650	-0.18292657		29.00000000	1.18413793	10.79803123	0.639685
30	-0.00994195	9.10126970	-0.09048437		30.00000000	1.14466667	10.41792005	0.661066
31	-0.00063424	9.09487250	-0.00576829		31.00000000	1.10774194	10.07477167	0.682666
32	0.00949494	9.11584090	0.08655433		32.00000000	1.07312500	9.78243677	0.704036
33	0.01930698	9.09897990	0.17567382		33.00000000	1.04060606	9.46845363	0.725393
34	0.02945468	9.10594940	0.26821279		34.00000000	1.01000000	9.19700889	0.746773
35	0.03929723	9.09543510	0.35742544		35.00000000	0.98114286	8.92392118	0.768240
36	0.04944642	9.11415200	0.45066218		36.00000000	0.95388889	8.69388832	0.789621
37	0.05925921	9.10091110	0.53931277		37.00000000	0.92810811	8.44662938	0.810963
38	0.06940913	9.11733440	0.63282627		38.00000000	0.90368421	8.23919114	0.832334
39	0.07956353	9.09072020	0.72328977		39.00000000	0.88051282	8.00449568	0.853810
40	0.08938301	9.10901360	0.81419109		40.00000000	0.85850000	7.82008818	0.875184
41	0.09954411	9.10741420	0.90658942		41.00000000	0.83756098	7.62801472	0.896538
42	0.10935839	9.10301690	0.99549127		42.00000000	0.81761905	7.44280001	0.917920
43	0.11948450	9.10369780	1.08775078		43.00000000	0.79860465	7.27025541	0.939390
44	0.12929356	9.11164670	1.17807724		44.00000000	0.78045455	7.11122608	0.960765
45	0.13943605	9.08142950	1.26627866		45.00000000	0.76311111	6.93013976	0.982110
46	0.14929870	9.11068920	1.36021405		46.00000000	0.74652174	6.80132755	1.003483
47	0.15942928	9.09185500	1.44950790		47.00000000	0.73063830	6.64285746	1.024968
48	0.16958293	9.10526660	1.54409779		48.00000000	0.71541667	6.51405948	1.046358
49	0.17941061	9.09233280	1.63126097		49.00000000	0.70081633	6.37205527	1.067708
50	0.18953896	9.10102460	1.72499874		50.00000000	0.68680000	6.25058370	1.089087
51	0.19932570	9.11615940	1.81708485		51.00000000	0.67333333	6.13821400	1.110570
52	0.20946670	9.09386630	1.90486216		52.00000000	0.66038462	6.00544940	1.131966
53	0.21927129	9.10183050	1.99577012		53.00000000	0.64792453	5.89729923	1.153324
54	0.22943461	9.08998300	2.08555670		54.00000000	0.63592593	5.78055586	1.174691
55	0.23924741	9.10042670	2.17725352		55.00000000	0.62436364	5.68197551	1.196159
56	0.24941519	9.10889630	2.27189710		56.00000000	0.61321429	5.58570534	1.217529
57	0.25954503	9.09881500	2.36155221		57.00000000	0.60245614	5.48163697	1.238913
58	0.26935485	9.09617420	2.45009864		58.00000000	0.59206897	5.38556245	1.260269
59	0.27951148	9.09423830	2.54194401		59.00000000	0.58203390	5.29315497	1.281753
60	0.28935254	9.10785480	2.63538092		60.00000000	0.57233333	5.21272890	1.303142
61	0.29949948	9.10102750	2.72575300		61.00000000	0.56295082	5.12343089	1.324532
62	0.30930930	9.10356620	2.81581769		62.00000000	0.55387097	5.04220102	1.346012
63	0.31944582	9.10745620	2.90933881		63.00000000	0.54507937	4.96428644	1.367385
64	0.32926756	9.10066410	2.99655346		64.00000000	0.53656250	4.88307508	1.388744
65	0.33943385	9.10262680	3.08973966		65.00000000	0.52830769	4.80898776	1.410109
66	0.34923920	9.09866140	3.17760923		66.00000000	0.52030303	4.73406110	1.431577
67	0.35940328	9.10043050	3.27072457		67.00000000	0.51253731	4.66431020	1.452964
68	0.36956957	9.10205270	3.36384170		68.00000000	0.50500000	4.59653661	1.474296
69	0.37939352	9.10477070	3.45429100		69.00000000	0.49768116	4.53127284	1.495677
70	0.38954717	9.08282850	3.53819014		70.00000000	0.49057143	4.45577615	1.517164
71	0.39935625	9.10453700	3.63595375		71.00000000	0.48366197	4.40351832	1.538547
72	0.40949053	9.10374450	3.72789716		72.00000000	0.47694444	4.34198036	1.559907
73	0.41933534	9.09691520	3.81465803		73.00000000	0.47041096	4.27928860	1.581274
74	0.42948824	9.09581380	3.90654506		74.00000000	0.46405405	4.22094927	1.602745
75	0.43929434	9.09403320	3.99495731		75.00000000	0.45786667	4.16385467	1.624133
76	0.44943309	9.09550860	4.08782254		76.00000000	0.45184211	4.10973375	1.645473
77	0.45960015	9.09806540	4.18147222		77.00000000	0.44597403	4.05750086	1.666846
78	0.46946651	9.08455370	4.26489372		78.00000000	0.44025641	3.99953300	1.688342
79	0.47959039	9.08540150	4.35727125		79.00000000	0.43468354	3.94927453	1.709725
80	0.48938754	9.06273940	4.43519174		80.00000000	0.42925000	3.89018089	1.731074
81	0.49953523	9.07212920	4.53184815		81.00000000	0.42395062	3.84613477	1.752443
82	0.50934803	9.04774280	4.60844997		82.00000000	0.41878049	3.78901814	1.773921
83	0.51948905	9.03085230	4.69142888		83.00000000	0.41373494	3.73637913	1.795311
84	0.52927208	8.99569320	4.76116925		84.00000000	0.40880952	3.67752505	1.816681
85	0.53940785	8.96051600	4.83337267		85.00000000	0.40400000	3.62004846	1.838042
86	0.54953915	8.91504000	4.89916350		86.00000000	0.39930233	3.55979620	1.859506
87	0.55935341	8.82141020	4.93428588		87.00000000	0.39471264	3.48192214	1.880894
88	0.56950116	8.70000550	4.95466322		88.00000000	0.39022727	3.39497942	1.902275
89	0.57931691	8.55041690	4.95340110		89.00000000	0.38584270	3.29911591	1.923632
90	0.58944154	8.30612470	4.89597493		90.00000000	0.38155556	3.16924802	1.945113
91	0.59923196	8.01991840	4.80579142		91.00000000	0.37736264	3.02641756	1.966479
92	0.60937744	7.57378390	4.61529304		92.00000000	0.37326087	2.82699716	1.987961
93	0.61915898	6.99907590	4.33354070		93.00000000	0.36924731	2.58438996	2.009461
94	0.62926424	6.21234230	3.90920486		94.00000000	0.36531915	2.26948760	2.030852
95	0.63939482	5.19078060	3.31895823		95.00000000	0.36147368	1.87633059	2.052223
96	0.64916223	3.91346840	2.54047587		96.00000000	0.35770833	1.39988026	2.073587
97	0.65928757	2.24845480	1.48237830		97.00000000	0.35402062	0.79599936	2.095065
98	0.66898501	0.27246162	0.18227274		98.00000000	0.35040816	0.09547278	2.116503
99	0.67910665	-2.20507740	-1.49748273		99.00000000	0.34686869	-0.76487230	2.137869
100	0.68881303	-5.04211000	-3.47307107		100.00000000	0.34340000	-1.73146057	2.159282
101	0.69902325	-8.51688390	-5.95349986		101.00000000	0.34000000	-2.89574053	2.180771
