# Supplementary material for: Study on the Electrical Injection Regeneration of Industrialized B-Doped Czochralski Silicon PERC Solar Cells
Source: Hindawi journal article supplement (doi:10.1155/2019/5357370), 2019-06-20
Supplement: f1 [file 5357370.f1.zip › section3.3/IVRawData_3-14-3h.csv]

00:15 04/04/2018
Test Lot:	JK-PERC
Recipe:	Recipe_YJX-LID
Cell Name:	3-14-3h
Test Order:	2
Test Condition:	Light
1	-0.29994044	9.10819440	-2.73191584		1.00000000	34.34000000	312.77539570	0.000000
2	-0.29010865	9.10566900	-2.64163334		2.00000000	17.17000000	156.34433673	0.061807
3	-0.27994940	9.11810400	-2.55260774		3.00000000	11.44666667	104.37189712	0.083243
4	-0.27014142	9.10848810	-2.46057991		4.00000000	8.58500000	78.19637034	0.104587
5	-0.25997841	9.09225270	-2.36378940		5.00000000	6.86800000	62.44559154	0.126064
6	-0.24983479	9.11410520	-2.27702056		6.00000000	5.72333333	52.16306209	0.147440
7	-0.23999406	9.12193390	-2.18920995		7.00000000	4.90571429	44.74960145	0.168819
8	-0.22988020	9.10225960	-2.09242926		8.00000000	4.29250000	39.07144933	0.190312
9	-0.22004767	9.10482600	-2.00349575		9.00000000	3.81555556	34.73996943	0.211781
10	-0.20990030	9.11931710	-1.91414740		10.00000000	3.43400000	31.31573492	0.233152
11	-0.20007521	9.10003850	-1.82069211		11.00000000	3.12181818	28.40866564	0.254559
12	-0.18991372	9.11078450	-1.73026298		12.00000000	2.86166667	26.07202831	0.275914
13	-0.18017422	9.10195730	-1.63993806		13.00000000	2.64153846	24.04317028	0.297408
14	-0.17002760	9.10311890	-1.54778146		14.00000000	2.45285714	22.32865022	0.318804
15	-0.16020921	9.10132690	-1.45811639		15.00000000	2.28933333	20.83597105	0.340163
16	-0.15005440	9.11586950	-1.36787633		16.00000000	2.14625000	19.56493491	0.361522
17	-0.13990109	9.10199260	-1.27337869		17.00000000	2.02000000	18.38602505	0.383002
18	-0.13009386	9.11175350	-1.18538318		18.00000000	1.90777778	17.38320084	0.404371
19	-0.11993533	9.10195730	-1.09164625		19.00000000	1.80736842	16.45059019	0.425749
20	-0.11013778	9.10934930	-1.00328351		20.00000000	1.71700000	15.64075275	0.447110
21	-0.09995544	9.10500340	-0.91009462		21.00000000	1.63523810	14.88884842	0.468585
22	-0.09012886	9.10427190	-0.82055766		22.00000000	1.56090909	14.21094077	0.489972
23	-0.07999267	9.10167030	-0.72806688		23.00000000	1.49304348	13.58918948	0.511349
24	-0.07018320	9.12108420	-0.64014690		24.00000000	1.43083333	13.05075131	0.532817
25	-0.06001128	9.10990330	-0.54669699		25.00000000	1.37360000	12.51336317	0.554205
26	-0.04988402	9.11474130	-0.45467992		26.00000000	1.32076923	12.03846986	0.575551
27	-0.04007753	9.09809210	-0.36462910		27.00000000	1.27185185	11.57142529	0.596929
28	-0.02989966	9.11818890	-0.27263074		28.00000000	1.22642857	11.18280739	0.618412
29	-0.02004554	9.10128970	-0.18244028		29.00000000	1.18413793	10.77718236	0.639788
30	-0.00995698	9.11449430	-0.09075282		30.00000000	1.14466667	10.43305781	0.661132
31	-0.00064618	9.10280040	-0.00588202		31.00000000	1.10774194	10.08355373	0.682625
32	0.00949056	9.10880850	0.08644766		32.00000000	1.07312500	9.77489012	0.704119
33	0.01931090	9.10505490	0.17582681		33.00000000	1.04060606	9.47477531	0.725509
34	0.02943341	9.10923190	0.26811578		34.00000000	1.01000000	9.20032422	0.746859
35	0.03927757	9.10022830	0.35743487		35.00000000	0.98114286	8.92862399	0.768238
36	0.04942315	9.11001300	0.45024558		36.00000000	0.95388889	8.68994018	0.789707
37	0.05924871	9.10840130	0.53966105		37.00000000	0.92810811	8.45358110	0.811096
38	0.06936899	9.11253640	0.63212743		38.00000000	0.90368421	8.23485526	0.832440
39	0.07954062	9.09341140	0.72329556		39.00000000	0.88051282	8.00686532	0.853813
40	0.08936022	9.12629130	0.81552742		40.00000000	0.85850000	7.83492108	0.875300
41	0.09947529	9.09834770	0.90506075		41.00000000	0.83756098	7.62042098	0.896680
42	0.10934103	9.10972120	0.99606630		42.00000000	0.81761905	7.44828157	0.918034
43	0.11948512	9.10179900	1.08752955		43.00000000	0.79860465	7.26873902	0.939421
44	0.12930399	9.11605640	1.17874247		44.00000000	0.78045455	7.11466765	0.960893
45	0.13941310	9.09216120	1.26756638		45.00000000	0.76311111	6.93832924	0.982288
46	0.14927140	9.11734100	1.36095826		46.00000000	0.74652174	6.80629326	1.003650
47	0.15939391	9.11453440	1.45280128		47.00000000	0.73063830	6.65942790	1.025020
48	0.16954248	9.09803390	1.54250323		48.00000000	0.71541667	6.50888509	1.046494
49	0.17937174	9.10994340	1.63406640		49.00000000	0.70081633	6.38439707	1.067874
50	0.18953297	9.11880300	1.72831382		50.00000000	0.68680000	6.26279390	1.089274
51	0.19929898	9.10121820	1.81386350		51.00000000	0.67333333	6.12815359	1.110617
52	0.20943041	9.11428740	1.90880895		52.00000000	0.66038462	6.01893518	1.132089
53	0.21925151	9.10156350	1.99553154		53.00000000	0.64792453	5.89712624	1.153468
54	0.22941570	9.11717610	2.09162334		54.00000000	0.63592593	5.79784865	1.174849
55	0.23923902	9.09577560	2.17606444		55.00000000	0.62436364	5.67907153	1.196329
56	0.24941213	9.11277680	2.27283707		56.00000000	0.61321429	5.58808492	1.217717
57	0.25954208	9.09393980	2.36026005		57.00000000	0.60245614	5.47869987	1.239064
58	0.26936540	9.11342240	2.45484067		58.00000000	0.59206897	5.39577457	1.260438
59	0.27950504	9.09460070	2.54198673		59.00000000	0.58203390	5.29336590	1.281911
60	0.28935367	9.10339930	2.63410200		60.00000000	0.57233333	5.21017887	1.303300
61	0.29947618	9.11002830	2.72823647		61.00000000	0.56295082	5.12849790	1.324688
62	0.30930471	9.09681220	2.81368686		62.00000000	0.55387097	5.03846018	1.346058
63	0.31943616	9.10917190	2.90979889		63.00000000	0.54507937	4.96522164	1.367532
64	0.32922971	9.10396670	2.99729632		64.00000000	0.53656250	4.88484713	1.388915
65	0.33943036	9.10311220	3.08987265		65.00000000	0.52830769	4.80924420	1.410264
66	0.34922466	9.09499840	3.17619772		66.00000000	0.52030303	4.73215523	1.431634
67	0.35939258	9.11529830	3.27597057		67.00000000	0.51253731	4.67193050	1.453117
68	0.36953592	9.10253140	3.36371232		68.00000000	0.50500000	4.59677836	1.474495
69	0.37937635	9.09899710	3.45194431		69.00000000	0.49768116	4.52839943	1.495846
70	0.38948324	9.09967420	3.54417059		70.00000000	0.49057143	4.46404017	1.517224
71	0.39933932	9.11102290	3.63838969		71.00000000	0.48366197	4.40665530	1.538729
72	0.40946630	9.10500810	3.72819398		72.00000000	0.47694444	4.34258303	1.560120
73	0.41928366	9.09765340	3.81449741		73.00000000	0.47041096	4.27963586	1.581485
74	0.42942327	9.10224440	3.90871555		74.00000000	0.46405405	4.22393341	1.602861
75	0.43928382	9.10264020	3.99864256		75.00000000	0.45786667	4.16779553	1.624330
76	0.44941080	9.10029030	4.08976874		76.00000000	0.45184211	4.11189433	1.645707
77	0.45957720	9.08839610	4.17681963		77.00000000	0.44597403	4.05318860	1.667060
78	0.46939161	9.08898350	4.26629260		78.00000000	0.44025641	4.00148325	1.688430
79	0.47955281	9.09267330	4.36041703		79.00000000	0.43468354	3.95243546	1.709900
80	0.48934564	9.07660390	4.44159654		80.00000000	0.42925000	3.89613222	1.731265
81	0.49948823	9.06434250	4.52753239		81.00000000	0.42395062	3.84283360	1.752648
82	0.50930560	9.06249140	4.61557762		82.00000000	0.41878049	3.79519457	1.773990
83	0.51946682	9.03290080	4.69229225		83.00000000	0.41373494	3.73722667	1.795455
84	0.52924621	9.00398060	4.76532261		84.00000000	0.40880952	3.68091302	1.816844
85	0.53937322	8.96937750	4.83784202		85.00000000	0.40400000	3.62362851	1.838225
86	0.54952174	8.90777590	4.89501651		86.00000000	0.39930233	3.55689563	1.859698
87	0.55934286	8.82827660	4.93803348		87.00000000	0.39471264	3.48463240	1.881077
88	0.56947726	8.71531960	4.96317633		88.00000000	0.39022727	3.40095540	1.902424
89	0.57928270	8.55080130	4.95333126		89.00000000	0.38584270	3.29926423	1.923834
90	0.58941638	8.32865720	4.90904698		90.00000000	0.38155556	3.17784542	1.945326
91	0.59924865	8.01787090	4.80469831		91.00000000	0.37736264	3.02564491	1.966697
92	0.60932875	7.58488230	4.62168685		92.00000000	0.37326087	2.83113976	1.988171
93	0.61912382	7.01002260	4.34007197		93.00000000	0.36924731	2.58843200	2.009570
94	0.62926787	6.22269580	3.91574253		94.00000000	0.36531915	2.27326993	2.031066
95	0.63938665	5.18566230	3.31564325		95.00000000	0.36147368	1.87448046	2.052458
96	0.64915717	3.92296580	2.54662138		96.00000000	0.35770833	1.40327756	2.073817
97	0.65926105	2.24630880	1.48090390		97.00000000	0.35402062	0.79523963	2.095201
98	0.66901815	0.26278931	0.17581082		98.00000000	0.35040816	0.09208352	2.116677
99	0.67909676	-2.20716760	-1.49888037		99.00000000	0.34686869	-0.76559733	2.138053
100	0.68880022	-5.05331900	-3.48072724		100.00000000	0.34340000	-1.73530974	2.159385
101	0.69900757	-8.53274820	-5.96445558		101.00000000	0.34000000	-2.90113439	2.180762
00:15 04/04/2018
Test Lot:	JK-PERC
Recipe:	Recipe_YJX-LID
Cell Name:	3-14-3h
Test Order:	3
Test Condition:	Light
1	-0.29994118	9.09972950	-2.72938360		1.00000000	34.34000000	312.48471103	0.000000
2	-0.29009676	9.10084250	-2.64012492		2.00000000	17.17000000	156.26146573	0.021615
3	-0.27999255	9.10659030	-2.54977744		3.00000000	11.44666667	104.24010363	0.043003
4	-0.27017343	9.10853960	-2.46088539		4.00000000	8.58500000	78.19681247	0.064402
5	-0.26001266	9.10590930	-2.36765170		5.00000000	6.86800000	62.53938507	0.085772
6	-0.24988838	9.09398840	-2.27248203		6.00000000	5.72333333	52.04792694	0.107258
7	-0.24004692	9.10982130	-2.18678454		7.00000000	4.90571429	44.69018049	0.128645
8	-0.22991370	9.10749820	-2.09393861		8.00000000	4.29250000	39.09393602	0.150042
9	-0.22008935	9.10409830	-2.00371508		9.00000000	3.81555556	34.73719285	0.171392
10	-0.20991370	9.10554410	-1.91137845		10.00000000	3.43400000	31.26843844	0.192867
11	-0.20012434	9.09620950	-1.82037292		11.00000000	3.12181818	28.39671220	0.214244
12	-0.18994944	9.10747810	-1.72996036		12.00000000	2.86166667	26.06256650	0.235624
13	-0.18018314	9.09970090	-1.63961268		13.00000000	2.64153846	24.03720992	0.257116
14	-0.16997476	9.10839080	-1.54819654		14.00000000	2.45285714	22.34158143	0.278493
15	-0.16018762	9.10763650	-1.45893061		15.00000000	2.28933333	20.85041583	0.299848
16	-0.15002835	9.09629630	-1.36470233		16.00000000	2.14625000	19.52292593	0.321231
17	-0.13986090	9.10852150	-1.27392601		17.00000000	2.02000000	18.39921343	0.342713
18	-0.13007079	9.10875130	-1.18478248		18.00000000	1.90777778	17.37747331	0.364084
19	-0.11991078	9.10553070	-1.09185129		19.00000000	1.80736842	16.45704864	0.385449
20	-0.11008866	9.09363650	-1.00110626		20.00000000	1.71700000	15.61377387	0.406822
21	-0.09994949	9.11195760	-0.91073549		21.00000000	1.63523810	14.90022019	0.428303
22	-0.09011472	9.09792230	-0.81985672		22.00000000	1.56090909	14.20102963	0.449695
23	-0.07994504	9.10739330	-0.72809088		23.00000000	1.49304348	13.59773417	0.471053
24	-0.07013929	9.11261650	-0.63915244		24.00000000	1.43083333	13.03863544	0.492433
25	-0.06000458	9.10362430	-0.54625919		25.00000000	1.37360000	12.50473834	0.513915
26	-0.04983341	9.10446740	-0.45370665		26.00000000	1.32076923	12.02490040	0.535274
27	-0.04001204	9.10290720	-0.36422588		27.00000000	1.27185185	11.57754938	0.556633
28	-0.02987063	9.10118960	-0.27185829		28.00000000	1.22642857	11.16195896	0.578011
29	-0.02006043	9.09428220	-0.18243518		29.00000000	1.18413793	10.76888451	0.599496
30	-0.00993391	9.11627960	-0.09056026		30.00000000	1.14466667	10.43510138	0.620872
31	-0.00070423	9.10206130	-0.00640994		31.00000000	1.10774194	10.08273500	0.642346
32	0.00942730	9.09998510	0.08578824		32.00000000	1.07312500	9.76542151	0.663723
33	0.01926699	9.10631180	0.17545123		33.00000000	1.04060606	9.47608325	0.685199
34	0.02944755	9.10398200	0.26808998		34.00000000	1.01000000	9.19502182	0.706574
35	0.03927609	9.10299680	0.35753009		35.00000000	0.98114286	8.93134029	0.727929
36	0.04938669	9.10894200	0.44986048		36.00000000	0.95388889	8.68891856	0.749301
37	0.05922862	9.09835910	0.53888324		37.00000000	0.92810811	8.44426085	0.770785
38	0.06936080	9.10638520	0.63162616		38.00000000	0.90368421	8.22929652	0.792229
39	0.07952127	9.09988120	0.72363410		39.00000000	0.88051282	8.01256206	0.813614
40	0.08931780	9.10266300	0.81302982		40.00000000	0.85850000	7.81463619	0.834964
41	0.09949017	9.10264020	0.90562325		41.00000000	0.83756098	7.62401621	0.856432
42	0.10930159	9.09675220	0.99428948		42.00000000	0.81761905	7.43767787	0.877802
43	0.11945536	9.10265640	1.08736110		43.00000000	0.79860465	7.26942374	0.899181
44	0.12926975	9.10142040	1.17653834		44.00000000	0.78045455	7.10324492	0.920681
45	0.13941161	9.10307690	1.26907461		45.00000000	0.76311111	6.94665913	0.942059
46	0.14924386	9.10457610	1.35880208		46.00000000	0.74652174	6.79676398	0.963403
47	0.15939094	9.08998010	1.44886047		47.00000000	0.73063830	6.64148759	0.984783
48	0.16953428	9.10381510	1.54340874		48.00000000	0.71541667	6.51302105	1.006258
49	0.17938663	9.10991950	1.63419776		49.00000000	0.70081633	6.38438032	1.027647
50	0.18951882	9.10449220	1.72547262		50.00000000	0.68680000	6.25296524	1.049002
51	0.19928856	9.09912200	1.81335092		51.00000000	0.67333333	6.12674215	1.070378
52	0.20946689	9.10502820	1.90720194		52.00000000	0.66038462	6.01282055	1.091857
53	0.21927309	9.10305400	1.99605478		53.00000000	0.64792453	5.89809197	1.113238
54	0.22942537	9.10960960	2.08997555		54.00000000	0.63592593	5.79303692	1.134598
55	0.23923977	9.10352610	2.17792549		55.00000000	0.62436364	5.68391066	1.155977
56	0.24937195	9.10672190	2.27096100		56.00000000	0.61321429	5.58437197	1.177454
57	0.25954655	9.10928250	2.36428285		57.00000000	0.60245614	5.48794318	1.198864
58	0.26932970	9.09731960	2.45017836		58.00000000	0.59206897	5.38624060	1.220216
59	0.27948421	9.10890870	2.54579615		59.00000000	0.58203390	5.30169364	1.241592
60	0.28933358	9.09969810	2.63284823		60.00000000	0.57233333	5.20806055	1.263078
61	0.29944789	9.11268140	2.72877322		61.00000000	0.56295082	5.12999146	1.284473
62	0.30928612	9.09873010	2.81411093		62.00000000	0.55387097	5.03952245	1.305830
63	0.31942424	9.09331130	2.90462405		63.00000000	0.54507937	4.95657635	1.327200
64	0.32926023	9.09682370	2.99522226		64.00000000	0.53656250	4.88101447	1.348693
65	0.33936560	9.10429570	3.08968477		65.00000000	0.52830769	4.80986945	1.370071
66	0.34924072	9.10066410	3.17832248		66.00000000	0.52030303	4.73510311	1.391486
67	0.35940921	9.10646530	3.27294750		67.00000000	0.51253731	4.66740326	1.453182
68	0.36957473	9.10101320	3.36350450		68.00000000	0.50500000	4.59601167	1.474615
69	0.37933686	9.10401060	3.45348679		69.00000000	0.49768116	4.53089455	1.495974
70	0.38951504	9.08972640	3.54058514		70.00000000	0.49057143	4.45916007	1.517456
71	0.39937019	9.11138340	3.63881492		71.00000000	0.48366197	4.40682966	1.538839
72	0.40950000	9.09724140	3.72532035		72.00000000	0.47694444	4.33887875	1.560215
73	0.41931868	9.10715770	3.81880135		73.00000000	0.47041096	4.28410679	1.581574
74	0.42944252	9.10355950	3.90945553		74.00000000	0.46405405	4.22454369	1.603048
75	0.43925676	9.09279060	3.99406974		75.00000000	0.45786667	4.16328572	1.624412
76	0.44943121	9.08720590	4.08407394		76.00000000	0.45184211	4.10598224	1.645806
77	0.45958334	9.09622000	4.18047117		77.00000000	0.44597403	4.05667785	1.667293
78	0.46947199	9.10168740	4.27298730		78.00000000	0.44025641	4.00707622	1.688669
79	0.47960177	9.08448410	4.35693465		79.00000000	0.43468354	3.94887575	1.710034
80	0.48938403	9.07890320	4.44307024		80.00000000	0.42925000	3.89711920	1.731412
81	0.49953538	9.04893970	4.52026553		81.00000000	0.42395062	3.83630357	1.752946
82	0.50936228	9.06630130	4.61803190		82.00000000	0.41878049	3.79679008	1.774330
83	0.51950920	9.02251430	4.68727919		83.00000000	0.41373494	3.73292941	1.795684
84	0.52929586	9.02637960	4.77762535		84.00000000	0.40880952	3.69006995	1.817065
85	0.53941303	8.95783230	4.83197146		85.00000000	0.40400000	3.61896425	1.838553
86	0.54957330	8.90292550	4.89281015		86.00000000	0.39930233	3.55495886	1.859927
87	0.55940169	8.82091810	4.93443649		87.00000000	0.39471264	3.48172790	1.881272
88	0.56952482	8.70707230	4.95889378		88.00000000	0.39022727	3.39773708	1.902654
89	0.57931525	8.54781150	4.95187756		89.00000000	0.38584270	3.29811064	1.924126
90	0.58945173	8.30474660	4.89524725		90.00000000	0.38155556	3.16872220	1.945512
91	0.59927708	8.01177600	4.80127373		91.00000000	0.37736264	3.02334492	1.966860
92	0.60935926	7.56892060	4.61219186		92.00000000	0.37326087	2.82518188	1.988334
93	0.61919957	7.00053600	4.33472888		93.00000000	0.36924731	2.58492910	2.009875
94	0.62927204	6.21491480	3.91087211		94.00000000	0.36531915	2.27042739	2.031262
95	0.63940704	5.18033890	3.31234516		95.00000000	0.36147368	1.87255619	2.052612
96	0.64916027	3.90268470	2.53346785		96.00000000	0.35770833	1.39602284	2.073985
97	0.65927666	2.23556900	1.47385846		97.00000000	0.35402062	0.79143752	2.095466
98	0.66897625	0.27099586	0.18128979		98.00000000	0.35040816	0.09495916	2.116859
99	0.67910975	-2.20628210	-1.49830769		99.00000000	0.34686869	-0.76529017	2.138267
100	0.68882054	-5.02332020	-3.46016613		100.00000000	0.34340000	-1.72500816	2.159629
101	0.69910067	-8.49479680	-5.93871813		101.00000000	0.34000000	-2.88823091	2.181104
00:15 04/04/2018
Test Lot:	JK-PERC
Recipe:	Recipe_YJX-LID
Cell Name:	3-14-3h
Test Order:	4
Test Condition:	Light
1	-0.29994088	9.09668250	-2.72846695		1.00000000	34.34000000	312.38007705	0.000000
2	-0.29010388	9.10151390	-2.64038450		2.00000000	17.17000000	156.27299366	0.061820
3	-0.27997807	9.09449290	-2.54625857		3.00000000	11.44666667	104.10162873	0.083244
4	-0.27014479	9.10665890	-2.46011646		4.00000000	8.58500000	78.18066666	0.104751
5	-0.25998402	9.11433120	-2.36958046		5.00000000	6.86800000	62.59722668	0.126127
6	-0.24985003	9.09990690	-2.27361201		6.00000000	5.72333333	52.08180049	0.147511
7	-0.24001749	9.10086630	-2.18436709		7.00000000	4.90571429	44.64624982	0.168859
8	-0.22991179	9.10849190	-2.09414968		8.00000000	4.29250000	39.09820148	0.190365
9	-0.22007775	9.10360340	-2.00350055		9.00000000	3.81555556	34.73530453	0.211762
10	-0.20991847	9.10768700	-1.91187172		10.00000000	3.43400000	31.27579716	0.233146
11	-0.20009857	9.09757900	-1.82041255		11.00000000	3.12181818	28.40098753	0.254626
12	-0.18993782	9.10848520	-1.73004582		12.00000000	2.86166667	26.06544848	0.276009
13	-0.18016034	9.10906890	-1.64109295		13.00000000	2.64153846	24.06195585	0.297360
14	-0.17001148	9.10375500	-1.54774286		14.00000000	2.45285714	22.33021048	0.318729
15	-0.16020125	9.10222630	-1.45818803		15.00000000	2.28933333	20.83803008	0.340217
16	-0.15007547	9.11233330	-1.36753770		16.00000000	2.14625000	19.55734535	0.361597
17	-0.13989310	9.10598470	-1.27386443		17.00000000	2.02000000	18.39408909	0.382962
18	-0.13010298	9.10693450	-1.18483932		18.00000000	1.90777778	17.37400726	0.404335
19	-0.11995263	9.10327150	-1.09196136		19.00000000	1.80736842	16.45296544	0.425812
20	-0.11014614	9.10136220	-1.00247992		20.00000000	1.71700000	15.62703890	0.447209
21	-0.09996676	9.10802080	-0.91049930		21.00000000	1.63523810	14.89378258	0.468556
22	-0.09012453	9.11605830	-0.82158050		22.00000000	1.56090909	14.22933827	0.489929
23	-0.07996152	9.10436630	-0.72799900		23.00000000	1.49304348	13.59321473	0.511414
24	-0.07018405	9.09780220	-0.63852062		24.00000000	1.43083333	13.01743865	0.532788
25	-0.06005305	9.10414410	-0.54673163		25.00000000	1.37360000	12.50545234	0.554127
26	-0.04988112	9.09993840	-0.45391508		26.00000000	1.32076923	12.01891864	0.575511
27	-0.04002996	9.11018370	-0.36468031		27.00000000	1.27185185	11.58680401	0.596993
28	-0.02987887	9.09984870	-0.27189316		28.00000000	1.22642857	11.16031444	0.618360
29	-0.02007013	9.10284420	-0.18269530		29.00000000	1.18413793	10.77902310	0.639721
30	-0.00992797	9.10128690	-0.09035730		30.00000000	1.14466667	10.41793974	0.661097
31	-0.00065511	9.09844300	-0.00596050		31.00000000	1.10774194	10.07872686	0.682684
32	0.00944889	9.11328790	0.08611044		32.00000000	1.07312500	9.77969708	0.704084
33	0.01932581	9.10029890	0.17587066		33.00000000	1.04060606	9.46982619	0.725444
34	0.02943420	9.09910110	0.26782472		34.00000000	1.01000000	9.19009211	0.746825
35	0.03927688	9.10668280	0.35768211		35.00000000	0.98114286	8.93495678	0.768311
36	0.04938527	9.09784410	0.44929947		36.00000000	0.95388889	8.67833240	0.789693
37	0.05924731	9.10380170	0.53937573		37.00000000	0.92810811	8.44931217	0.811094
38	0.06939439	9.09680270	0.63126705		38.00000000	0.90368421	8.22063697	0.832448
39	0.07949087	9.10965350	0.72413428		39.00000000	0.88051282	8.02116670	0.853921
40	0.08932835	9.10348130	0.81319895		40.00000000	0.85850000	7.81533870	0.875298
41	0.09948362	9.10447600	0.90574620		41.00000000	0.83756098	7.62555380	0.896686
42	0.10928835	9.11687760	0.99636851		42.00000000	0.81761905	7.45413278	0.918171
43	0.11945627	9.09517190	1.08647531		43.00000000	0.79860465	7.26344658	0.939583
44	0.12924761	9.11753560	1.17841969		44.00000000	0.78045455	7.11582210	0.960931
45	0.13942371	9.10683630	1.26970890		45.00000000	0.76311111	6.94952797	0.982314
46	0.14921282	9.11326980	1.35981669		46.00000000	0.74652174	6.80325402	1.003793
47	0.15936957	9.09141920	1.44889557		47.00000000	0.73063830	6.64253905	1.025169
48	0.16951741	9.09912400	1.54245993		48.00000000	0.71541667	6.50966496	1.046524
49	0.17933330	9.09552100	1.63112980		49.00000000	0.70081633	6.37428962	1.067888
50	0.18950048	9.10961820	1.72627702		50.00000000	0.68680000	6.25648578	1.089362
51	0.19926056	9.09637070	1.81254792		51.00000000	0.67333333	6.12488960	1.110749
52	0.20940021	9.10016060	1.90557554		52.00000000	0.66038462	6.00960606	1.132098
53	0.21925183	9.10245990	1.99573099		53.00000000	0.64792453	5.89770704	1.153466
54	0.22938849	9.09260560	2.08573907		54.00000000	0.63592593	5.78222364	1.174951
55	0.23920661	9.11177060	2.17959576		55.00000000	0.62436364	5.68905823	1.196347
56	0.24934924	9.10621170	2.27062697		56.00000000	0.61321429	5.58405910	1.217692
57	0.25949335	9.09346490	2.35969367		57.00000000	0.60245614	5.47841377	1.239079
58	0.26931071	9.11517240	2.45481355		58.00000000	0.59206897	5.39681069	1.260555
59	0.27949131	9.10026070	2.54344378		59.00000000	0.58203390	5.29666021	1.281934
60	0.28934216	9.11115840	2.63624225		60.00000000	0.57233333	5.21461966	1.303290
61	0.29947737	9.08468630	2.72065796		61.00000000	0.56295082	5.11423160	1.324663
62	0.30930442	9.11383340	2.81894895		62.00000000	0.55387097	5.04788773	1.346147
63	0.31943512	9.10120680	2.90724509		63.00000000	0.54507937	4.96088002	1.367522
64	0.32926071	9.09959790	2.99614007		64.00000000	0.53656250	4.88250300	1.388889
65	0.33941001	9.11313920	3.09309067		65.00000000	0.52830769	4.81454154	1.410260
66	0.34921473	9.10115050	3.17825581		66.00000000	0.52030303	4.73535618	1.431743
67	0.35938415	9.11459450	3.27564080		67.00000000	0.51253731	4.67156978	1.453137
68	0.36952454	9.10080150	3.36296949		68.00000000	0.50500000	4.59590476	1.474533
69	0.37933597	9.09352970	3.44950291		69.00000000	0.49768116	4.52567840	1.495877
70	0.38950166	9.10489650	3.54637230		70.00000000	0.49057143	4.46660208	1.517344
71	0.39932650	9.10000040	3.63387131		71.00000000	0.48366197	4.40132414	1.538734
72	0.40946612	9.09995560	3.72612351		72.00000000	0.47694444	4.34017327	1.560109
73	0.41931701	9.08996010	3.81157489		73.00000000	0.47041096	4.27601685	1.581595
74	0.42945665	9.10212990	3.90897021		74.00000000	0.46405405	4.22388028	1.602980
75	0.43925318	9.09479810	3.99491899		75.00000000	0.45786667	4.16420489	1.624322
76	0.44939953	9.08503530	4.08281059		76.00000000	0.45184211	4.10500148	1.645704
77	0.45954141	9.09919450	4.18145667		77.00000000	0.44597403	4.05800440	1.667183
78	0.46938038	9.09386730	4.26848289		78.00000000	0.44025641	4.00363337	1.688551
79	0.47954905	9.07571790	4.35225190		79.00000000	0.43468354	3.94506522	1.709920
80	0.48934931	9.07895570	4.44278071		80.00000000	0.42925000	3.89714173	1.731288
81	0.49946812	9.06731030	4.52883243		81.00000000	0.42395062	3.84409180	1.752760
82	0.50930333	9.05307290	4.61076017		82.00000000	0.41878049	3.79125029	1.774144
83	0.51945937	9.02532100	4.68828756		83.00000000	0.41373494	3.73409064	1.795494
84	0.52922988	9.00486090	4.76564145		84.00000000	0.40880952	3.68127290	1.816868
85	0.53938812	8.96753600	4.83698238		85.00000000	0.40400000	3.62288454	1.838361
86	0.54950172	8.90139960	4.89133439		86.00000000	0.39930233	3.55434956	1.859738
87	0.55934292	8.81960110	4.93318143		87.00000000	0.39471264	3.48120807	1.881088
88	0.56948328	8.70966340	4.96000768		88.00000000	0.39022727	3.39874819	1.902467
89	0.57929397	8.54764650	4.95160008		89.00000000	0.38584270	3.29804698	1.923948
90	0.58942693	8.31617550	4.90177779		90.00000000	0.38155556	3.17308296	1.945358
91	0.59921974	8.00840000	4.79879137		91.00000000	0.37736264	3.02207095	1.966712
92	0.60933858	7.57848930	4.61786591		92.00000000	0.37326087	2.82875351	1.988190
93	0.61913508	6.99583770	4.33136853		93.00000000	0.36924731	2.58319426	2.009687
94	0.62927252	6.21794940	3.91278469		94.00000000	0.36531915	2.27153598	2.031074
95	0.63939726	5.18715760	3.31665436		95.00000000	0.36147368	1.87502097	2.052435
96	0.64917225	3.91758660	2.54318851		96.00000000	0.35770833	1.40135337	2.073812
97	0.65926945	2.24428840	1.47959078		97.00000000	0.35402062	0.79452437	2.095305
98	0.66896629	0.25537732	0.17083882		98.00000000	0.35040816	0.08948630	2.116681
99	0.67910147	-2.19779970	-1.49252901		99.00000000	0.34686869	-0.76234790	2.138082
100	0.68879378	-5.05595110	-3.48250767		100.00000000	0.34340000	-1.73621361	2.159426
101	0.69904137	-8.53090860	-5.96345804		101.00000000	0.34000000	-2.90050892	2.180893
00:16 04/04/2018
Test Lot:	JK-PERC
Recipe:	Recipe_YJX-LID
Cell Name:	3-14-3h
Test Order:	5
Test Condition:	Light
1	-0.29991600	9.08747010	-2.72547768		1.00000000	34.34000000	312.06372323	0.000000
2	-0.29009777	9.09159760	-2.63745219		2.00000000	17.17000000	156.10273079	0.061786
3	-0.27995059	9.09241010	-2.54542557		3.00000000	11.44666667	104.07778761	0.083200
4	-0.27012715	9.09622480	-2.45713728		4.00000000	8.58500000	78.09108991	0.104702
5	-0.25999483	9.08353610	-2.36167242		5.00000000	6.86800000	62.38572593	0.126077
6	-0.24982978	9.10052780	-2.27358286		6.00000000	5.72333333	52.08535411	0.147516
7	-0.24001156	9.09319310	-2.18247146		7.00000000	4.90571429	44.60860729	0.168870
8	-0.22983758	9.09507850	-2.09039083		8.00000000	4.29250000	39.04062446	0.190360
9	-0.22001489	9.08975980	-1.99988250		9.00000000	3.81555556	34.68248350	0.211742
10	-0.20991161	9.08625700	-1.90731084		10.00000000	3.43400000	31.20220654	0.233129
11	-0.20007329	9.10095310	-1.82085763		11.00000000	3.12181818	28.41152086	0.254603
12	-0.18993130	9.08846000	-1.72618302		12.00000000	2.86166667	26.00814303	0.275997
13	-0.18010713	9.09553050	-1.63816989		13.00000000	2.64153846	24.02619364	0.297343
14	-0.16996068	9.08020500	-1.54327782		14.00000000	2.45285714	22.27244569	0.318718
15	-0.16014618	9.09974000	-1.45728860		15.00000000	2.28933333	20.83233811	0.340196
16	-0.15000941	9.09778400	-1.36475321		16.00000000	2.14625000	19.52611891	0.361564
17	-0.13985477	9.10510730	-1.27339269		17.00000000	2.02000000	18.39231675	0.382922
18	-0.13001348	9.09050560	-1.18188827		18.00000000	1.90777778	17.34266457	0.404301
19	-0.11987894	9.09698960	-1.09053747		19.00000000	1.80736842	16.44161173	0.425775
20	-0.11006890	9.09214970	-1.00076292		20.00000000	1.71700000	15.61122103	0.447163
21	-0.09991501	9.08852670	-0.90808026		21.00000000	1.63523810	14.86190509	0.468500
22	-0.09008190	9.09619810	-0.81940281		22.00000000	1.56090909	14.19833831	0.489877
23	-0.07993843	9.08801270	-0.72648150		23.00000000	1.49304348	13.56879809	0.511357
24	-0.07010905	9.09580610	-0.63769830		24.00000000	1.43083333	13.01458256	0.532734
25	-0.05996186	9.10414410	-0.54590137		25.00000000	1.37360000	12.50545234	0.554085
26	-0.04979383	9.08862970	-0.45255766		26.00000000	1.32076923	12.00398246	0.575462
27	-0.04000760	9.10396580	-0.36422784		27.00000000	1.27185185	11.57889576	0.596944
28	-0.02985893	9.08838940	-0.27136955		28.00000000	1.22642857	11.14626043	0.618322
29	-0.02004740	9.08997150	-0.18223028		29.00000000	1.18413793	10.76378005	0.639684
30	-0.00991733	9.10007670	-0.09024844		30.00000000	1.14466667	10.41655446	0.661064
31	-0.00065432	9.08532910	-0.00594467		31.00000000	1.10774194	10.06420004	0.682648
32	0.00950011	9.10268880	0.08647652		32.00000000	1.07312500	9.76832292	0.704035
33	0.01933071	9.09792900	0.17586939		33.00000000	1.04060606	9.46736006	0.725390
34	0.02947240	9.10444640	0.26832985		34.00000000	1.01000000	9.19549086	0.746758
35	0.03928290	9.10163400	0.35753861		35.00000000	0.98114286	8.93000319	0.768249
36	0.04939482	9.09933090	0.44945981		36.00000000	0.95388889	8.67975064	0.789642
37	0.05923659	9.09859850	0.53896991		37.00000000	0.92810811	8.44448304	0.811030
38	0.06940209	9.08790210	0.63071941		38.00000000	0.90368421	8.21259363	0.832364
39	0.07955495	9.09509370	0.72355968		39.00000000	0.88051282	8.00834661	0.853836
40	0.08936098	9.09055230	0.81234068		40.00000000	0.85850000	7.80423915	0.875216
41	0.09953021	9.09027860	0.90475729		41.00000000	0.83756098	7.61366261	0.896604
42	0.10932583	9.08453750	0.99317460		42.00000000	0.81761905	7.42769090	0.918077
43	0.11947943	9.10124870	1.08741201		43.00000000	0.79860465	7.26829954	0.939451
44	0.12931524	9.09785080	1.17649076		44.00000000	0.78045455	7.10045901	0.960792
45	0.13944204	9.07882980	1.26597055		45.00000000	0.76311111	6.92815590	0.982177
46	0.14929050	9.10765740	1.35968673		46.00000000	0.74652174	6.79906424	1.003661
47	0.15941359	9.08461760	1.44821151		47.00000000	0.73063830	6.63756954	1.025041
48	0.16955081	9.08667090	1.54065241		48.00000000	0.71541667	6.50075581	1.046396
49	0.17940672	9.07933240	1.62889325		49.00000000	0.70081633	6.36294438	1.067768
50	0.18954691	9.11103150	1.72696787		50.00000000	0.68680000	6.25745643	1.089252
51	0.19932765	9.09768870	1.81342091		51.00000000	0.67333333	6.12577706	1.110628
52	0.20945743	9.10544780	1.90720370		52.00000000	0.66038462	6.01309764	1.131969
53	0.21929473	9.08049870	1.99130551		53.00000000	0.64792453	5.88347784	1.153353
54	0.22945577	9.10374160	2.08890604		54.00000000	0.63592593	5.78930531	1.174839
55	0.23925512	9.08636860	2.17396021		55.00000000	0.62436364	5.67319814	1.196225
56	0.24938788	9.09302230	2.26768955		56.00000000	0.61321429	5.57597117	1.217615
57	0.25956008	9.09354020	2.36032002		57.00000000	0.60245614	5.47845913	1.239044
58	0.26939514	9.09300420	2.44961114		58.00000000	0.59206897	5.38368559	1.260533
59	0.27951896	9.09304620	2.54167882		59.00000000	0.58203390	5.29246113	1.281935
60	0.28933021	9.07927700	2.62690912		60.00000000	0.57233333	5.19637287	1.303287
61	0.29950538	9.09086800	2.72276387		61.00000000	0.56295082	5.11771159	1.324661
62	0.30926603	9.09311960	2.81219300		62.00000000	0.55387097	5.03641495	1.346141
63	0.31946874	9.09985830	2.90712027		63.00000000	0.54507937	4.96014498	1.367519
64	0.32927999	9.08656690	2.99202466		64.00000000	0.53656250	4.87551105	1.388887
65	0.33943656	9.09114840	3.08586814		65.00000000	0.52830769	4.80292363	1.410262
66	0.34921879	9.08421420	3.17237829		66.00000000	0.52030303	4.72654418	1.431743
67	0.35939324	9.08791070	3.26613367		67.00000000	0.51253731	4.65789333	1.453112
68	0.36952749	9.07886700	3.35489093		68.00000000	0.50500000	4.58482784	1.474503
69	0.37935808	9.10729310	3.45492522		69.00000000	0.49768116	4.53252819	1.495850
70	0.38953176	9.07175540	3.53373685		70.00000000	0.49057143	4.45034401	1.517319
71	0.39935270	9.09587960	3.63246408		71.00000000	0.48366197	4.39933106	1.538715
72	0.40948471	9.07837960	3.71745764		72.00000000	0.47694444	4.32988271	1.560103
73	0.41933540	9.08737850	3.81065950		73.00000000	0.47041096	4.27480243	1.581584
74	0.42946222	9.08547880	3.90186990		74.00000000	0.46405405	4.21615327	1.602950
75	0.43927270	9.08236980	3.98963710		75.00000000	0.45786667	4.15851439	1.624274
76	0.44944045	9.07811740	4.08007317		76.00000000	0.45184211	4.10187568	1.645649
77	0.45956948	9.08084770	4.17328046		77.00000000	0.44597403	4.04982221	1.667136
78	0.46944177	9.07687090	4.26106234		78.00000000	0.44025641	3.99615060	1.688517
79	0.47959685	9.08932780	4.35921298		79.00000000	0.43468354	3.95098122	1.709874
80	0.48939618	9.04633140	4.42724003		80.00000000	0.42925000	3.88313775	1.731249
81	0.49951556	9.07528400	4.53324557		81.00000000	0.42395062	3.84747225	1.752736
82	0.50934690	9.01056480	4.58950325		82.00000000	0.41878049	3.77344872	1.774130
83	0.51947296	9.03546520	4.69367985		83.00000000	0.41373494	3.73828765	1.795490
84	0.52927083	8.99194150	4.75917234		84.00000000	0.40880952	3.67599132	1.816907
85	0.53941846	8.95292950	4.82937544		85.00000000	0.40400000	3.61698352	1.838384
86	0.54956162	8.88751320	4.88423615		86.00000000	0.39930233	3.54880469	1.859759
87	0.55935651	8.80134010	4.92308688		87.00000000	0.39471264	3.47400022	1.881123
88	0.56951755	8.69247720	4.95051832		88.00000000	0.39022727	3.39204167	1.902503
89	0.57932210	8.51579190	4.93338645		89.00000000	0.38584270	3.28575611	1.923983
90	0.58943850	8.28219130	4.88184242		90.00000000	0.38155556	3.16011610	1.945365
91	0.59923190	7.96040770	4.77013023		91.00000000	0.37736264	3.00396044	1.966718
92	0.60935199	7.51304960	4.57809172		92.00000000	0.37326087	2.80432743	1.988203
93	0.61919749	6.92823600	4.28994634		93.00000000	0.36924731	2.55823252	2.009691
94	0.62924761	6.11007740	3.84475160		94.00000000	0.36531915	2.23212828	2.031077
95	0.63938636	5.04595040	3.22631186		95.00000000	0.36147368	1.82397828	2.052434
96	0.64918047	3.73781540	2.42651676		96.00000000	0.35770833	1.33704772	2.073802
97	0.65930575	2.04237770	1.34655136		97.00000000	0.35402062	0.72304382	2.095291
98	0.66897339	0.02907254	0.01944876		98.00000000	0.35040816	0.01018726	2.116668
99	0.67909276	-2.49222590	-1.69245256		99.00000000	0.34686869	-0.86447513	2.138082
100	0.68878716	-5.37414690	-3.70164338		100.00000000	0.34340000	-1.84548205	2.159468
101	0.69905984	-8.88265710	-6.20950885		101.00000000	0.34000000	-3.02010341	2.180962
00:35 04/04/2018
Test Lot:	JK-PERC
Recipe:	Recipe_YJX-LID
Cell Name:	3-14-3h
Test Order:	2
Test Condition:	Light
1	-0.29994929	9.12082000	-2.73578348		1.00000000	34.34000000	313.20895880	0.000000
2	-0.29015115	9.10775470	-2.64262550		2.00000000	17.17000000	156.38014820	0.061782
3	-0.28000769	9.10535140	-2.54956841		3.00000000	11.44666667	104.22592236	0.083206
4	-0.27018055	9.10291100	-2.45942950		4.00000000	8.58500000	78.14849094	0.104703
5	-0.26002592	9.10704040	-2.36806656		5.00000000	6.86800000	62.54715347	0.126150
6	-0.24986386	9.10529140	-2.27508326		6.00000000	5.72333333	52.11261778	0.147509
7	-0.24004862	9.11012940	-2.18687399		7.00000000	4.90571429	44.69169194	0.168876
8	-0.22991334	9.11305810	-2.09521363		8.00000000	4.29250000	39.11780189	0.190369
9	-0.22006907	9.10350890	-2.00340074		9.00000000	3.81555556	34.73494396	0.211759
10	-0.20993751	9.10856530	-1.91222952		10.00000000	3.43400000	31.27881324	0.233115
11	-0.20009920	9.10854720	-1.82261301		11.00000000	3.12181818	28.43522826	0.254486
12	-0.18994980	9.11401270	-1.73120489		12.00000000	2.86166667	26.08126634	0.275965
13	-0.18019408	9.10396100	-1.64047988		13.00000000	2.64153846	24.04846313	0.297342
14	-0.17001490	9.10767080	-1.54843974		14.00000000	2.45285714	22.33981538	0.318695
15	-0.16020635	9.10961720	-1.45941852		15.00000000	2.28933333	20.85495031	0.340067
16	-0.15007332	9.10927680	-1.36705941		16.00000000	2.14625000	19.55078533	0.361542
17	-0.13990305	9.10449500	-1.27374662		17.00000000	2.02000000	18.39107990	0.382923
18	-0.13006400	9.10860250	-1.18470128		18.00000000	1.90777778	17.37718944	0.404286
19	-0.11994659	9.10350890	-1.09193485		19.00000000	1.80736842	16.45339451	0.425655
20	-0.11009935	9.11766620	-1.00384912		20.00000000	1.71700000	15.65503287	0.447136
21	-0.09995291	9.09532260	-0.90910392		21.00000000	1.63523810	14.87301800	0.468512
22	-0.09013394	9.11204720	-0.82130474		22.00000000	1.56090909	14.22307731	0.489906
23	-0.07997932	9.10803790	-0.72845463		23.00000000	1.49304348	13.59869659	0.511255
24	-0.07017598	9.10836510	-0.63918847		24.00000000	1.43083333	13.03255240	0.532722
25	-0.06000349	9.10655590	-0.54642516		25.00000000	1.37360000	12.50876518	0.554112
26	-0.04984738	9.10210700	-0.45371618		26.00000000	1.32076923	12.02178286	0.575493
27	-0.04003065	9.10990240	-0.36467529		27.00000000	1.27185185	11.58644624	0.596970
28	-0.02990728	9.10964680	-0.27244478		28.00000000	1.22642857	11.17233111	0.618362
29	-0.02006971	9.10227390	-0.18268001		29.00000000	1.18413793	10.77834778	0.639707
30	-0.00995825	9.10982230	-0.09071792		30.00000000	1.14466667	10.42770993	0.661084
31	-0.00067069	9.09998700	-0.00610324		31.00000000	1.10774194	10.08043721	0.682677
32	0.00947629	9.10719390	0.08630239		32.00000000	1.07312500	9.77315745	0.704059
33	0.01928679	9.11165620	0.17573455		33.00000000	1.04060606	9.48164466	0.725423
34	0.02941284	9.10322670	0.26775175		34.00000000	1.01000000	9.19425897	0.746791
35	0.03926501	9.09755230	0.35721552		35.00000000	0.98114286	8.92599846	0.768257
36	0.04937470	9.10151100	0.44938434		36.00000000	0.95388889	8.68183022	0.789647
37	0.05922687	9.09705540	0.53879013		37.00000000	0.92810811	8.44305088	0.811001
38	0.06936111	9.10022930	0.63120203		38.00000000	0.90368421	8.22373353	0.832375
39	0.07950131	9.11415290	0.72458709		39.00000000	0.88051282	8.02512848	0.853857
40	0.08933860	9.09736920	0.81274624		40.00000000	0.85850000	7.81009146	0.875247
41	0.09947953	9.11045840	0.90630416		41.00000000	0.83756098	7.63056443	0.896593
42	0.10928334	9.09015940	0.99340298		42.00000000	0.81761905	7.43228747	0.917986
43	0.11943618	9.11519150	1.08868365		43.00000000	0.79860465	7.27943433	0.939462
44	0.12927422	9.09890080	1.17625330		44.00000000	0.78045455	7.10127849	0.960845
45	0.13939580	9.10453030	1.26913328		45.00000000	0.76311111	6.94776823	0.982196
46	0.14920333	9.10194300	1.35804021		46.00000000	0.74652174	6.79479832	1.003565
47	0.15938818	9.10535140	1.45128539		47.00000000	0.73063830	6.65271845	1.025037
48	0.16949265	9.10177800	1.54268447		48.00000000	0.71541667	6.51156368	1.046410
49	0.17936268	9.10598560	1.63327398		49.00000000	0.70081633	6.38162338	1.067769
50	0.18947311	9.10041140	1.72428325		50.00000000	0.68680000	6.25016255	1.089135
51	0.19931635	9.09631250	1.81304381		51.00000000	0.67333333	6.12485042	1.110613
52	0.20944092	9.10685350	1.90734778		52.00000000	0.66038462	6.01402595	1.131992
53	0.21925291	9.10756780	1.99686074		53.00000000	0.64792453	5.90101657	1.153382
54	0.22939533	9.09606360	2.08659451		54.00000000	0.63592593	5.78442267	1.174717
55	0.23923635	9.11363890	2.18031371		55.00000000	0.62436364	5.69022472	1.196189
56	0.24935645	9.09171490	2.26707775		56.00000000	0.61321429	5.57516946	1.217582
57	0.25955096	9.11205670	2.36504306		57.00000000	0.60245614	5.48961451	1.238969
58	0.26934958	9.09988020	2.45104891		58.00000000	0.59206897	5.38775666	1.260456
59	0.27948007	9.10859580	2.54567099		59.00000000	0.58203390	5.30151152	1.281830
60	0.28931439	9.10292430	2.63360699		60.00000000	0.57233333	5.20990701	1.303204
61	0.29946575	9.10933300	2.72793324		61.00000000	0.56295082	5.12810648	1.324584
62	0.30928594	9.09406950	2.81266783		62.00000000	0.55387097	5.03694107	1.346105
63	0.31945366	9.11679170	2.91239248		63.00000000	0.54507937	4.96937503	1.367488
64	0.32925448	9.08663270	2.99181452		64.00000000	0.53656250	4.87554636	1.388847
65	0.33939245	9.10947700	3.09168772		65.00000000	0.52830769	4.81260677	1.410222
66	0.34922081	9.10238550	3.17874244		66.00000000	0.52030303	4.73599876	1.431704
67	0.35934612	9.09913440	3.26973864		67.00000000	0.51253731	4.66364590	1.453091
68	0.36951384	9.10389900	3.36401668		68.00000000	0.50500000	4.59746900	1.474450
69	0.37931243	9.09845730	3.45115795		69.00000000	0.49768116	4.52813078	1.495817
70	0.38948092	9.11121750	3.54864537		70.00000000	0.49057143	4.46970299	1.517303
71	0.39929661	9.08534620	3.62774794		71.00000000	0.48366197	4.39423646	1.538683
72	0.40944797	9.10032750	3.72611062		72.00000000	0.47694444	4.34035064	1.560040
73	0.41925773	9.09303000	3.81232312		73.00000000	0.47041096	4.27746096	1.581409
74	0.42942250	9.10574820	3.91021316		74.00000000	0.46405405	4.22555937	1.602876
75	0.43924043	9.09532930	3.99503635		75.00000000	0.45786667	4.16444811	1.624256
76	0.44936275	9.09569360	4.08726589		76.00000000	0.45184211	4.10981735	1.645604
77	0.45953569	9.09032440	4.17732850		77.00000000	0.44597403	4.05404857	1.666975
78	0.46939456	9.08790970	4.26581537		78.00000000	0.44025641	4.00101050	1.688431
79	0.47948268	9.08351520	4.35538821		79.00000000	0.43468354	3.94845458	1.709810
80	0.48930433	9.07633590	4.44109046		80.00000000	0.42925000	3.89601719	1.731176
81	0.49947503	9.07063290	4.53055464		81.00000000	0.42395062	3.84550042	1.752543
82	0.50928557	9.05170060	4.60990050		82.00000000	0.41878049	3.79067559	1.774024
83	0.51945400	9.03985310	4.69578785		83.00000000	0.41373494	3.74010308	1.795387
84	0.52924889	9.00492480	4.76584645		84.00000000	0.40880952	3.68129902	1.816777
85	0.53937197	8.96637820	4.83621307		85.00000000	0.40400000	3.62241679	1.838126
86	0.54950023	8.90178490	4.89153285		86.00000000	0.39930233	3.55450341	1.859595
87	0.55934125	8.82728960	4.93746720		87.00000000	0.39471264	3.48424281	1.880975
88	0.56946957	8.70223710	4.95565922		88.00000000	0.39022727	3.39585025	1.902351
89	0.57928896	8.54251290	4.94858341		89.00000000	0.38584270	3.29606621	1.923842
90	0.58943069	8.32168290	4.90505529		90.00000000	0.38155556	3.17518434	1.945230
91	0.59919578	8.00348470	4.79565426		91.00000000	0.37736264	3.02021609	1.966572
92	0.60933369	7.57362030	4.61486200		92.00000000	0.37326087	2.82693610	1.988057
93	0.61913306	6.99577240	4.33131397		93.00000000	0.36924731	2.58317015	2.009568
94	0.62925839	6.20850940	3.90675663		94.00000000	0.36531915	2.26808737	2.030945
95	0.63936359	5.19028040	3.31847631		95.00000000	0.36147368	1.87614978	2.052302
96	0.64915770	3.89472060	2.52828787		96.00000000	0.35770833	1.39317401	2.073669
97	0.65926439	2.22849560	1.46916779		97.00000000	0.35402062	0.78893339	2.095167
98	0.66896403	0.23543423	0.15749703		98.00000000	0.35040816	0.08249808	2.116600
99	0.67904764	-2.23461870	-1.51741255		99.00000000	0.34686869	-0.77511925	2.137963
100	0.68875396	-5.09510660	-3.50927485		100.00000000	0.34340000	-1.74965961	2.159350
101	0.69904375	-8.60207650	-6.01322781		101.00000000	0.34000000	-2.92470601	2.180827
00:35 04/04/2018
Test Lot:	JK-PERC
Recipe:	Recipe_YJX-LID
Cell Name:	3-14-3h
Test Order:	3
Test Condition:	Light
1	-0.29989487	9.11287780	-2.73290530		1.00000000	34.34000000	312.93622365	0.000000
2	-0.29007962	9.10114860	-2.64005773		2.00000000	17.17000000	156.26672146	0.061788
3	-0.27994728	9.10221670	-2.54814081		3.00000000	11.44666667	104.19004049	0.083194
4	-0.27009034	9.10667130	-2.45962395		4.00000000	8.58500000	78.18077311	0.104618
5	-0.25993496	9.11471370	-2.36923274		5.00000000	6.86800000	62.59985369	0.126113
6	-0.24978478	9.11364360	-2.27644946		6.00000000	5.72333333	52.16042020	0.147504
7	-0.23999184	9.09368230	-2.18240955		7.00000000	4.90571429	44.61100717	0.168880
8	-0.22981115	9.11151600	-2.09392797		8.00000000	4.29250000	39.11118243	0.190241
9	-0.21999067	9.10398770	-2.00279235		9.00000000	3.81555556	34.73677085	0.211717
10	-0.20982337	9.12201980	-1.91401294		10.00000000	3.43400000	31.32501599	0.233092
11	-0.20001629	9.09727000	-1.81960219		11.00000000	3.12181818	28.40002289	0.254479
12	-0.18984675	9.11007600	-1.72951832		12.00000000	2.86166667	26.07000082	0.275969
13	-0.18009253	9.09146210	-1.63730441		13.00000000	2.64153846	24.01544681	0.297338
14	-0.16994160	9.10724830	-1.54770035		14.00000000	2.45285714	22.33877904	0.318696
15	-0.16012336	9.10466190	-1.45786906		15.00000000	2.28933333	20.84360598	0.340068
16	-0.14996052	9.09647940	-1.36411278		16.00000000	2.14625000	19.52331891	0.361542
17	-0.13981034	9.11048980	-1.27374068		17.00000000	2.02000000	18.40318940	0.382920
18	-0.12999880	9.10463140	-1.18359116		18.00000000	1.90777778	17.36961346	0.404256
19	-0.11987615	9.09502410	-1.09027647		19.00000000	1.80736842	16.43805935	0.425630
20	-0.11005344	9.10939310	-1.00252005		20.00000000	1.71700000	15.64082795	0.447116
21	-0.09989955	9.11915110	-0.91099905		21.00000000	1.63523810	14.91198327	0.468495
22	-0.09009693	9.10210510	-0.82007171		22.00000000	1.56090909	14.20755860	0.489865
23	-0.07995940	9.10685160	-0.72817839		23.00000000	1.49304348	13.59692539	0.511235
24	-0.07011734	9.10554310	-0.63845645		24.00000000	1.43083333	13.02851459	0.532710
25	-0.05997758	9.10803130	-0.54627768		25.00000000	1.37360000	12.51079179	0.554097
26	-0.04980135	9.11168100	-0.45377401		26.00000000	1.32076923	12.03442791	0.575442
27	-0.03999948	9.09990690	-0.36399155		27.00000000	1.27185185	11.57373344	0.596819
28	-0.02986940	9.11116030	-0.27214486		28.00000000	1.22642857	11.17418731	0.618310
29	-0.02002362	9.10531430	-0.18232132		29.00000000	1.18413793	10.78194804	0.639690
30	-0.00987418	9.09888080	-0.08984398		30.00000000	1.14466667	10.41518556	0.661050
31	-0.00060892	9.11465640	-0.00555010		31.00000000	1.10774194	10.09668712	0.682539
32	0.00952096	9.09568980	0.08659967		32.00000000	1.07312500	9.76081212	0.704019
33	0.01934711	9.10262870	0.17610953		33.00000000	1.04060606	9.47225059	0.725406
34	0.02946053	9.10418130	0.26821402		34.00000000	1.01000000	9.19522311	0.746773
35	0.03929933	9.10018540	0.35763121		35.00000000	0.98114286	8.92858190	0.768121
36	0.04945518	9.10589030	0.45033342		36.00000000	0.95388889	8.68600758	0.789591
37	0.05928133	9.10382080	0.53968658		37.00000000	0.92810811	8.44932990	0.810962
38	0.06942824	9.09913060	0.63173665		38.00000000	0.90368421	8.22274065	0.832341
39	0.07958260	9.09785080	0.72403064		39.00000000	0.88051282	8.01077427	0.853713
40	0.08942661	9.10814000	0.81451006		40.00000000	0.85850000	7.81933819	0.875188
41	0.09954971	9.10454650	0.90635497		41.00000000	0.83756098	7.62561285	0.896557
42	0.10935279	9.11026570	0.99623297		42.00000000	0.81761905	7.44872677	0.917943
43	0.11953766	9.08992670	1.08658857		43.00000000	0.79860465	7.25925774	0.939423
44	0.12935637	9.10696980	1.17804456		44.00000000	0.78045455	7.10757598	0.960815
45	0.13949807	9.08385850	1.26718073		45.00000000	0.76311111	6.93199335	0.982159
46	0.14930189	9.11421110	1.36076894		46.00000000	0.74652174	6.80395672	1.003531
47	0.15945700	9.09596540	1.45041535		47.00000000	0.73063830	6.64586068	1.025011
48	0.16961209	9.12331010	1.54742369		48.00000000	0.71541667	6.52696810	1.046392
49	0.17942931	9.08651260	1.63038669		49.00000000	0.70081633	6.36797638	1.067730
50	0.18956730	9.11712170	1.72830814		50.00000000	0.68680000	6.26163918	1.089115
51	0.19937111	9.10458850	1.81519192		51.00000000	0.67333333	6.13042292	1.110593
52	0.20946221	9.10409740	1.90696436		52.00000000	0.66038462	6.01220586	1.131968
53	0.21929803	9.10267930	1.99619964		53.00000000	0.64792453	5.89784919	1.153324
54	0.22944199	9.09976670	2.08786858		54.00000000	0.63592593	5.78677756	1.174693
55	0.23929492	9.10211180	2.17808912		55.00000000	0.62436364	5.68302762	1.196181
56	0.24943365	9.10524270	2.27115392		56.00000000	0.61321429	5.58346490	1.217578
57	0.25955006	9.09676460	2.36106580		57.00000000	0.60245614	5.48040169	1.238932
58	0.26939929	9.11136440	2.45459510		58.00000000	0.59206897	5.39455609	1.260309
59	0.27956107	9.09973530	2.54393174		59.00000000	0.58203390	5.29635441	1.281791
60	0.28937903	9.10067460	2.63354439		60.00000000	0.57233333	5.20861943	1.303161
61	0.29949841	9.10475350	2.72685920		61.00000000	0.56295082	5.12552845	1.324512
62	0.30935434	9.10809800	2.81762965		62.00000000	0.55387097	5.04471105	1.345894
63	0.31946924	9.09643270	2.90603044		63.00000000	0.54507937	4.95827776	1.367367
64	0.32929242	9.10481830	2.99814765		64.00000000	0.53656250	4.88530407	1.388748
65	0.33943486	9.10965820	3.09213556		65.00000000	0.52830769	4.81270250	1.410106
66	0.34926176	9.08540440	3.17318433		66.00000000	0.52030303	4.72716344	1.431460
67	0.35941538	9.10185430	3.27134642		67.00000000	0.51253731	4.66503995	1.452932
68	0.36957419	9.09797950	3.36237840		68.00000000	0.50500000	4.59447965	1.474299
69	0.37941596	9.10188290	3.45339964		69.00000000	0.49768116	4.52983563	1.495669
70	0.38957331	9.08994010	3.54119805		70.00000000	0.49057143	4.45926490	1.517023
71	0.39936373	9.10163780	3.63486402		71.00000000	0.48366197	4.40211609	1.538495
72	0.40954116	9.09146880	3.72333068		72.00000000	0.47694444	4.33612554	1.559887
73	0.41933456	9.09678080	3.81459457		73.00000000	0.47041096	4.27922538	1.581270
74	0.42948520	9.10504530	3.91048220		74.00000000	0.46405405	4.22523318	1.602745
75	0.43929422	9.08067610	3.98908852		75.00000000	0.45786667	4.15773890	1.624127
76	0.44944859	9.10327630	4.09145470		76.00000000	0.45184211	4.11324353	1.645485
77	0.45960370	9.08862500	4.17716568		77.00000000	0.44597403	4.05329068	1.666919
78	0.46946183	9.09353350	4.26906688		78.00000000	0.44025641	4.00348642	1.688411
79	0.47960430	9.07889750	4.35427828		79.00000000	0.43468354	3.94644734	1.709797
80	0.48940068	9.07967190	4.44359760		80.00000000	0.42925000	3.89744916	1.731135
81	0.49955428	9.06986330	4.53088903		81.00000000	0.42395062	3.84517414	1.752510
82	0.50939679	9.04604630	4.60802695		82.00000000	0.41878049	3.78830768	1.774000
83	0.51951915	9.03924750	4.69606218		83.00000000	0.41373494	3.73985252	1.795375
84	0.52926719	8.98821540	4.75716751		84.00000000	0.40880952	3.67446806	1.816738
85	0.53943789	8.96566010	4.83641677		85.00000000	0.40400000	3.62212668	1.838118
86	0.54954535	8.90215970	4.89214047		86.00000000	0.39930233	3.55465307	1.859586
87	0.55940872	8.82371330	4.93606216		87.00000000	0.39471264	3.48283120	1.880969
88	0.56952363	8.71031570	4.96073062		88.00000000	0.39022727	3.39900274	1.902307
89	0.57932895	8.54119870	4.94816367		89.00000000	0.38584270	3.29555914	1.923682
90	0.58948332	8.31437110	4.90118308		90.00000000	0.38155556	3.17239448	1.945166
91	0.59926480	8.00160120	4.79507794		91.00000000	0.37736264	3.01950533	1.966537
92	0.60937899	7.56484270	4.60985620		92.00000000	0.37326087	2.82365976	1.988013
93	0.61918426	7.00025080	4.33444511		93.00000000	0.36924731	2.58482379	2.009419
94	0.62929398	6.21335550	3.91002721		94.00000000	0.36531915	2.26985774	2.030910
95	0.63943571	5.17987250	3.31219545		95.00000000	0.36147368	1.87238760	2.052308
96	0.64921200	3.90359090	2.53425806		96.00000000	0.35770833	1.39634699	2.073664
97	0.65928447	2.22529010	1.46709920		97.00000000	0.35402062	0.78779858	2.095093
98	0.66901165	0.23987579	0.16047970		98.00000000	0.35040816	0.08405443	2.116589
99	0.67910498	-2.23894330	-1.52047754		99.00000000	0.34686869	-0.77661932	2.137978
100	0.68882471	-5.09478140	-3.50941132		100.00000000	0.34340000	-1.74954793	2.159365
101	0.69906241	-8.58819390	-6.00368353		101.00000000	0.34000000	-2.91998593	2.180714
00:36 04/04/2018
Test Lot:	JK-PERC
Recipe:	Recipe_YJX-LID
Cell Name:	3-14-3h
Test Order:	4
Test Condition:	Light
1	-0.29993582	9.10654740	-2.73137976		1.00000000	34.34000000	312.71883772	0.000000
2	-0.29009286	9.10496520	-2.64128540		2.00000000	17.17000000	156.33225248	0.061798
3	-0.27997753	9.11166570	-2.55106166		3.00000000	11.44666667	104.29820005	0.083230
4	-0.27014649	9.08700940	-2.45482369		4.00000000	8.58500000	78.01197570	0.104707
5	-0.26000881	9.10813620	-2.36819565		5.00000000	6.86800000	62.55467942	0.126084
6	-0.24981828	9.10009670	-2.27337051		6.00000000	5.72333333	52.08288678	0.147442
7	-0.24001998	9.10062600	-2.18433207		7.00000000	4.90571429	44.64507098	0.168811
8	-0.22989570	9.10370830	-2.09290339		8.00000000	4.29250000	39.07766788	0.190281
9	-0.22005722	9.10087780	-2.00271387		9.00000000	3.81555556	34.72490485	0.211710
10	-0.20990615	9.10118680	-1.91039508		10.00000000	3.43400000	31.25347547	0.233072
11	-0.20007287	9.10366340	-1.82139606		11.00000000	3.12181818	28.41998192	0.254457
12	-0.18994635	9.09703450	-1.72794850		12.00000000	2.86166667	26.03268039	0.275942
13	-0.18015328	9.10859680	-1.64094359		13.00000000	2.64153846	24.06070878	0.297320
14	-0.17002229	9.08999060	-1.54550102		14.00000000	2.45285714	22.29644837	0.318676
15	-0.16021357	9.10791590	-1.45921172		15.00000000	2.28933333	20.85105547	0.340049
16	-0.15005730	9.10214330	-1.36584305		16.00000000	2.14625000	19.53547506	0.361520
17	-0.13989952	9.09918880	-1.27297215		17.00000000	2.02000000	18.38036138	0.382904
18	-0.13008262	9.10541060	-1.18445567		18.00000000	1.90777778	17.37110000	0.404265
19	-0.11994644	9.10001180	-1.09151402		19.00000000	1.80736842	16.44707396	0.425625
20	-0.11011762	9.10233310	-1.00232726		20.00000000	1.71700000	15.62870593	0.447102
21	-0.09994496	9.10050110	-0.90954925		21.00000000	1.63523810	14.88148608	0.468477
22	-0.09012062	9.10962100	-0.82096470		22.00000000	1.56090909	14.21929023	0.489873
23	-0.07998592	9.08397390	-0.72659005		23.00000000	1.49304348	13.56276799	0.511227
24	-0.07015339	9.11515710	-0.63945920		24.00000000	1.43083333	13.04227062	0.532697
25	-0.05997999	9.09911920	-0.54576508		25.00000000	1.37360000	12.49855013	0.554088
26	-0.04985124	9.10328770	-0.45381020		26.00000000	1.32076923	12.02334229	0.575466
27	-0.04002467	9.10348990	-0.36436416		27.00000000	1.27185185	11.57829049	0.596938
28	-0.02987806	9.10212140	-0.27195371		28.00000000	1.22642857	11.16310175	0.618325
29	-0.02004627	9.10675240	-0.18255644		29.00000000	1.18413793	10.78365095	0.639666
30	-0.00991232	9.10046580	-0.09020669		30.00000000	1.14466667	10.41699985	0.661028
31	-0.00062906	9.10241700	-0.00572594		31.00000000	1.10774194	10.08312903	0.682629
32	0.00950693	9.09862330	0.08649993		32.00000000	1.07312500	9.76396013	0.704014
33	0.01931164	9.10454270	0.17582362		33.00000000	1.04060606	9.47424231	0.725362
34	0.02946317	9.09398370	0.26793755		34.00000000	1.01000000	9.18492354	0.746743
35	0.03927606	9.09926410	0.35738327		35.00000000	0.98114286	8.92767798	0.768224
36	0.04942313	9.11089610	0.45028898		36.00000000	0.95388889	8.69078256	0.789612
37	0.05924049	9.09682750	0.53890055		37.00000000	0.92810811	8.44283936	0.810957
38	0.06939947	9.08807950	0.63070789		38.00000000	0.90368421	8.21275395	0.832326
39	0.07956216	9.10917570	0.72474567		39.00000000	0.88051282	8.02074599	0.853797
40	0.08934604	9.09431740	0.81254121		40.00000000	0.85850000	7.80747149	0.875171
41	0.09952212	9.09757710	0.90541017		41.00000000	0.83756098	7.61977555	0.896515
42	0.10929856	9.10117820	0.99474567		42.00000000	0.81761905	7.44129665	0.917893
43	0.11947986	9.10621170	1.08800890		43.00000000	0.79860465	7.27226302	0.939374
44	0.12928160	9.09564110	1.17589903		44.00000000	0.78045455	7.09873444	0.960768
45	0.13942792	9.09236810	1.26772997		45.00000000	0.76311111	6.93848712	0.982132
46	0.14925718	9.10513210	1.35900634		46.00000000	0.74652174	6.79717905	1.003507
47	0.15942881	9.09850500	1.45056382		47.00000000	0.73063830	6.64771621	1.024987
48	0.16954164	9.10127540	1.54304516		48.00000000	0.71541667	6.51120411	1.046365
49	0.17934114	9.10636040	1.63314506		49.00000000	0.70081633	6.38188604	1.067733
50	0.18949267	9.09870530	1.72413796		50.00000000	0.68680000	6.24899080	1.089101
51	0.19931003	9.09778880	1.81328056		51.00000000	0.67333333	6.12584446	1.110583
52	0.20944965	9.12040710	1.91026607		52.00000000	0.66038462	6.02297653	1.131950
53	0.21924841	9.09807970	1.99473951		53.00000000	0.64792453	5.89486900	1.153338
54	0.22940366	9.10192970	2.08801599		54.00000000	0.63592593	5.78815307	1.174681
55	0.23921657	9.10701660	2.17854927		55.00000000	0.62436364	5.68609000	1.196153
56	0.24937107	9.09068110	2.26695287		56.00000000	0.61321429	5.57453552	1.217538
57	0.25952929	9.11120510	2.36462459		57.00000000	0.60245614	5.48910146	1.238923
58	0.26936823	9.10378170	2.45226956		58.00000000	0.59206897	5.39006661	1.260406
59	0.27952647	9.09403710	2.54202409		59.00000000	0.58203390	5.29303786	1.281789
60	0.28934532	9.10106660	2.63335103		60.00000000	0.57233333	5.20884378	1.303137
61	0.29947677	9.09615990	2.72408859		61.00000000	0.56295082	5.12069067	1.324500
62	0.30931422	9.09222510	2.81235451		62.00000000	0.55387097	5.03591952	1.345978
63	0.31946501	9.10420610	2.90847529		63.00000000	0.54507937	4.96251488	1.367355
64	0.32927045	9.09514900	2.99476380		64.00000000	0.53656250	4.88011589	1.388699
65	0.33942422	9.09646030	3.08755894		65.00000000	0.52830769	4.80572995	1.410080
66	0.34926391	9.10632510	3.18051071		66.00000000	0.52030303	4.73804854	1.431554
67	0.35936484	9.09802440	3.26951008		67.00000000	0.51253731	4.66307698	1.452956
68	0.36953869	9.09911060	3.36247341		68.00000000	0.50500000	4.59505085	1.474308
69	0.37936425	9.09988980	3.45217287		69.00000000	0.49768116	4.52884371	1.495684
70	0.38950685	9.10369680	3.54595226		70.00000000	0.49057143	4.46601354	1.517168
71	0.39933684	9.09560300	3.63220936		71.00000000	0.48366197	4.39919728	1.538532
72	0.40947276	9.09608650	3.72459964		72.00000000	0.47694444	4.33832792	1.559872
73	0.41928715	9.09740350	3.81442439		73.00000000	0.47041096	4.27951830	1.581253
74	0.42944688	9.09891220	3.90749946		74.00000000	0.46405405	4.22238709	1.602735
75	0.43925902	9.09913920	3.99687897		75.00000000	0.45786667	4.16619254	1.624112
76	0.44938600	9.09057430	4.08517682		76.00000000	0.45184211	4.10750423	1.645466
77	0.45953527	9.08748340	4.17601914		77.00000000	0.44597403	4.05278156	1.666837
78	0.46942857	9.08869550	4.26649333		78.00000000	0.44025641	4.00135645	1.688310
79	0.47954959	9.07691760	4.35283211		79.00000000	0.43468354	3.94558671	1.709707
80	0.48936769	9.06579490	4.43650711		80.00000000	0.42925000	3.89149246	1.731066
81	0.49951625	9.06984040	4.53053266		81.00000000	0.42395062	3.84516444	1.752438
82	0.50932318	9.04726510	4.60798183		82.00000000	0.41878049	3.78881809	1.773920
83	0.51947027	9.02702810	4.68927272		83.00000000	0.41373494	3.73479693	1.795294
84	0.52923703	8.99454980	4.76024882		84.00000000	0.40880952	3.67705762	1.816684
85	0.53935504	8.96558670	4.83563437		85.00000000	0.40400000	3.62209703	1.838022
86	0.54951030	8.90124130	4.89132378		86.00000000	0.39930233	3.55428635	1.859495
87	0.55931801	8.81279850	4.92915692		87.00000000	0.39471264	3.47852299	1.880881
88	0.56945908	8.70022870	4.95442423		88.00000000	0.39022727	3.39506652	1.902274
89	0.57933003	8.54592900	4.95091330		89.00000000	0.38584270	3.29738429	1.923756
90	0.58944362	8.31153110	4.89917898		90.00000000	0.38155556	3.17131087	1.945156
91	0.59924310	8.00675110	4.79799035		91.00000000	0.37736264	3.02144871	1.966510
92	0.60932767	7.56612440	4.61024895		92.00000000	0.37326087	2.82413817	1.987984
93	0.61917555	6.99117520	4.32876475		93.00000000	0.36924731	2.58147265	2.009499
94	0.62927645	6.20680710	3.90579754		94.00000000	0.36531915	2.26746549	2.030870
95	0.63935953	5.16883950	3.30474679		95.00000000	0.36147368	1.86839946	2.052244
96	0.64913672	3.89722660	2.52983289		96.00000000	0.35770833	1.39407043	2.073616
97	0.65928453	2.21478580	1.46017402		97.00000000	0.35402062	0.78407984	2.095096
98	0.66899323	0.23849586	0.15955212		98.00000000	0.35040816	0.08357090	2.116494
99	0.67908448	-2.25254580	-1.52966889		99.00000000	0.34686869	-0.78133760	2.137837
100	0.68878871	-5.10150050	-3.51385595		100.00000000	0.34340000	-1.75185527	2.159214
101	0.69901615	-8.58866980	-6.00361890		101.00000000	0.34000000	-2.92014773	2.180694
