# Supplementary material for: Study on the Electrical Injection Regeneration of Industrialized B-Doped Czochralski Silicon PERC Solar Cells
Source: Hindawi journal article supplement (doi:10.1155/2019/5357370), 2019-06-20
Supplement: f1 [file 5357370.f1.zip › section3.3/IVRawData_3-14-4h.csv]

01:41 04/04/2018
Test Lot:	JK-PERC
Recipe:	Recipe_YJX-LID
Cell Name:	3-14-4h
Test Order:	2
Test Condition:	Light
1	-0.29991648	9.11861320	-2.73482237		1.00000000	34.34000000	313.13317729	0.000000
2	-0.29011756	9.10553550	-2.64167574		2.00000000	17.17000000	156.34204454	0.061803
3	-0.27998298	9.09479140	-2.54638680		3.00000000	11.44666667	104.10504556	0.083243
4	-0.27016994	9.11429880	-2.46240956		4.00000000	8.58500000	78.24625520	0.104602
5	-0.25997284	9.10237790	-2.36637103		5.00000000	6.86800000	62.51513142	0.126078
6	-0.24981147	9.10426040	-2.27434867		6.00000000	5.72333333	52.10671702	0.147463
7	-0.24004529	9.11612800	-2.18828359		7.00000000	4.90571429	44.72111936	0.168838
8	-0.22989212	9.10200120	-2.09247835		8.00000000	4.29250000	39.07034015	0.190323
9	-0.22006045	9.11143020	-2.00506543		9.00000000	3.81555556	34.76516812	0.211700
10	-0.20988718	9.10503960	-1.91103109		10.00000000	3.43400000	31.26670599	0.233100
11	-0.20009719	9.11064050	-1.82301356		11.00000000	3.12181818	28.44176316	0.254491
12	-0.18994698	9.10395340	-1.72926845		12.00000000	2.86166667	26.05247998	0.275984
13	-0.18015848	9.10625460	-1.64056899		13.00000000	2.64153846	24.05452177	0.297364
14	-0.17001349	9.10052390	-1.54721183		14.00000000	2.45285714	22.32228505	0.318732
15	-0.16015577	9.11417390	-1.45968754		15.00000000	2.28933333	20.86538212	0.340106
16	-0.15003310	9.11121460	-1.36698377		16.00000000	2.14625000	19.55494434	0.361581
17	-0.13988587	9.10439210	-1.27357581		17.00000000	2.02000000	18.39087204	0.382966
18	-0.13009663	9.10567760	-1.18461797		18.00000000	1.90777778	17.37160938	0.404302
19	-0.11993675	9.10288910	-1.09177093		19.00000000	1.80736842	16.45227430	0.425678
20	-0.11008499	9.10544870	-1.00237323		20.00000000	1.71700000	15.63405542	0.447166
21	-0.09992809	9.11202430	-0.91054717		21.00000000	1.63523810	14.90032926	0.468544
22	-0.09007930	9.10562900	-0.82022869		22.00000000	1.56090909	14.21305908	0.489905
23	-0.07996854	9.11023040	-0.72853184		23.00000000	1.49304348	13.60197008	0.511295
24	-0.07017633	9.10801700	-0.63916717		24.00000000	1.43083333	13.03205432	0.532769
25	-0.05999411	9.11066250	-0.54658612		25.00000000	1.37360000	12.51440601	0.554144
26	-0.04984986	9.10567380	-0.45391656		26.00000000	1.32076923	12.02649378	0.575500
27	-0.04002341	9.10783860	-0.36452671		27.00000000	1.27185185	11.58382139	0.596874
28	-0.02990148	9.11098960	-0.27243207		28.00000000	1.22642857	11.17397796	0.618345
29	-0.02007949	9.11873820	-0.18309963		29.00000000	1.18413793	10.79784379	0.639720
30	-0.00990398	9.08613490	-0.08998890		30.00000000	1.14466667	10.40059575	0.661080
31	-0.00068112	9.12150380	-0.00621284		31.00000000	1.10774194	10.10427227	0.682561
32	0.00944209	9.09689900	0.08589371		32.00000000	1.07312500	9.76210974	0.704045
33	0.01929505	9.10075280	0.17559952		33.00000000	1.04060606	9.47029852	0.725443
34	0.02947325	9.11816790	0.26874207		34.00000000	1.01000000	9.20934958	0.746820
35	0.03927115	9.10525990	0.35757399		35.00000000	0.98114286	8.93356071	0.768165
36	0.04937418	9.11375520	0.44998417		36.00000000	0.95388889	8.69350982	0.789635
37	0.05923831	9.10991290	0.53965582		37.00000000	0.92810811	8.45498403	0.811016
38	0.06935845	9.09174350	0.63058926		38.00000000	0.90368421	8.21606505	0.832393
39	0.07953070	9.11954120	0.72528350		39.00000000	0.88051282	8.02987294	0.853871
40	0.08934050	9.08905700	0.81202091		40.00000000	0.85850000	7.80295543	0.875246
41	0.09946288	9.11596490	0.90670014		41.00000000	0.83756098	7.63517646	0.896587
42	0.10931287	9.10664180	0.99547315		42.00000000	0.81761905	7.44576380	0.917960
43	0.11945907	9.10678200	1.08788771		43.00000000	0.79860465	7.27271846	0.939445
44	0.12929566	9.11434940	1.17844582		44.00000000	0.78045455	7.11333542	0.960817
45	0.13942996	9.11477660	1.27087294		45.00000000	0.76311111	6.95558730	0.982182
46	0.14925538	9.10017870	1.35825063		46.00000000	0.74652174	6.79348123	1.003554
47	0.15942912	9.09722420	1.45036245		47.00000000	0.73063830	6.64678040	1.025085
48	0.16958126	9.10979270	1.54485012		48.00000000	0.71541667	6.51729753	1.046462
49	0.17937693	9.09060570	1.63064494		49.00000000	0.70081633	6.37084489	1.067821
50	0.18949856	9.10021210	1.72447709		50.00000000	0.68680000	6.25002567	1.089203
51	0.19933516	9.11017320	1.81597783		51.00000000	0.67333333	6.13418329	1.110683
52	0.20942850	9.11296080	1.90851371		52.00000000	0.66038462	6.01805911	1.132059
53	0.21925916	9.09920410	1.99508385		53.00000000	0.64792453	5.89559752	1.153413
54	0.22940907	9.10920050	2.08973322		54.00000000	0.63592593	5.79277676	1.174782
55	0.23926277	9.09535220	2.17617916		55.00000000	0.62436364	5.67880717	1.196274
56	0.24939632	9.10684870	2.27121455		56.00000000	0.61321429	5.58444972	1.217672
57	0.25955293	9.10831260	2.36408922		57.00000000	0.60245614	5.48735885	1.239020
58	0.26936647	9.10258010	2.45192987		58.00000000	0.59206897	5.38935518	1.260391
59	0.27953798	9.09870620	2.54343395		59.00000000	0.58203390	5.29575544	1.281877
60	0.28932917	9.11728670	2.63789699		60.00000000	0.57233333	5.21812709	1.303258
61	0.29946867	9.11010840	2.72819205		61.00000000	0.56295082	5.12854299	1.324629
62	0.30931270	9.09636690	2.81362181		62.00000000	0.55387097	5.03821354	1.345995
63	0.31944698	9.10398010	2.90823895		63.00000000	0.54507937	4.96239169	1.367479
64	0.32922700	9.10034560	2.99607948		64.00000000	0.53656250	4.88290419	1.388864
65	0.33941936	9.11095810	3.09243557		65.00000000	0.52830769	4.81338925	1.410252
66	0.34923512	9.10772320	3.18073680		66.00000000	0.52030303	4.73877598	1.431604
67	0.35936642	9.10777850	3.27302975		67.00000000	0.51253731	4.66807632	1.453073
68	0.36953345	9.10131170	3.36323911		68.00000000	0.50500000	4.59616241	1.474456
69	0.37934846	9.09551910	3.45037116		69.00000000	0.49768116	4.52666849	1.495839
70	0.38949615	9.10020830	3.54449610		70.00000000	0.49057143	4.46430219	1.517328
71	0.39931265	9.10232160	3.63467216		71.00000000	0.48366197	4.40244681	1.538699
72	0.40946853	9.09489150	3.72407185		72.00000000	0.47694444	4.33775797	1.560050
73	0.41929916	9.11108970	3.82027226		73.00000000	0.47041096	4.28595644	1.581436
74	0.42943865	9.08649540	3.90209232		74.00000000	0.46405405	4.21662503	1.602916
75	0.43925887	9.10577110	3.99979072		75.00000000	0.45786667	4.16922906	1.624349
76	0.44939390	9.09262470	4.08617008		76.00000000	0.45184211	4.10843069	1.645717
77	0.45954457	9.08928590	4.17693198		77.00000000	0.44597403	4.05358543	1.667089
78	0.46939084	9.09245110	4.26791326		78.00000000	0.44025641	4.00300988	1.688570
79	0.47955266	9.07915210	4.35393154		79.00000000	0.43468354	3.94655801	1.709945
80	0.48935726	9.06704040	4.43702205		80.00000000	0.42925000	3.89202709	1.731293
81	0.49950495	9.06449890	4.52776207		81.00000000	0.42395062	3.84289990	1.752668
82	0.50931996	9.04669190	4.60766076		82.00000000	0.41878049	3.78857805	1.774141
83	0.51945871	9.03396130	4.69276988		83.00000000	0.41373494	3.73766543	1.795518
84	0.52925062	8.97776600	4.75148822		84.00000000	0.40880952	3.67019624	1.816878
85	0.53940576	8.95515250	4.83046084		85.00000000	0.40400000	3.61788161	1.838260
86	0.54952222	8.88664250	4.88340751		86.00000000	0.39930233	3.54845702	1.859734
87	0.55936325	8.80898000	4.92741968		87.00000000	0.39471264	3.47701578	1.881122
88	0.56948638	8.68616390	4.94665204		88.00000000	0.39022727	3.38957805	1.902471
89	0.57928723	8.52139660	4.93633623		89.00000000	0.38584270	3.28791864	1.923844
90	0.58942896	8.28723620	4.88473701		90.00000000	0.38155556	3.16204101	1.945337
91	0.59921497	7.96150680	4.77065406		91.00000000	0.37736264	3.00437520	1.966715
92	0.60934776	7.54312800	4.59638815		92.00000000	0.37326087	2.81555452	1.988182
93	0.61914569	6.94219060	4.29822739		93.00000000	0.36924731	2.56338522	2.009613
94	0.62929112	6.15800950	3.87518070		94.00000000	0.36531915	2.24963879	2.031118
95	0.63938594	5.12401060	3.27622033		95.00000000	0.36147368	1.85219499	2.052512
96	0.64917046	3.83275700	2.48811262		96.00000000	0.35770833	1.37100912	2.073897
97	0.65926307	2.17758370	1.43560052		97.00000000	0.35402062	0.77090953	2.095247
98	0.66898727	0.20631041	0.13801904		98.00000000	0.35040816	0.07229285	2.116713
99	0.67908067	-2.23754760	-1.51947532		99.00000000	0.34686869	-0.77613520	2.138083
100	0.68876243	-5.04559660	-3.47521738		100.00000000	0.34340000	-1.73265787	2.159460
101	0.69901657	-8.45044900	-5.90700387		101.00000000	0.34000000	-2.87315266	2.180980
01:41 04/04/2018
Test Lot:	JK-PERC
Recipe:	Recipe_YJX-LID
Cell Name:	3-14-4h
Test Order:	3
Test Condition:	Light
1	-0.29993138	9.09601780	-2.72818117		1.00000000	34.34000000	312.35725125	0.000000
2	-0.29004836	9.11250970	-2.64306849		2.00000000	17.17000000	156.46179155	0.021584
3	-0.27994952	9.09922700	-2.54732423		3.00000000	11.44666667	104.15581839	0.042965
4	-0.27012527	9.11404900	-2.46193495		4.00000000	8.58500000	78.24411067	0.064312
5	-0.26000559	9.10328770	-2.36690569		5.00000000	6.86800000	62.52137992	0.085695
6	-0.24989632	9.11170200	-2.27698080		6.00000000	5.72333333	52.14930778	0.107185
7	-0.24004009	9.11347290	-2.18759886		7.00000000	4.90571429	44.70809420	0.128556
8	-0.22987425	9.10700420	-2.09346576		8.00000000	4.29250000	39.09181553	0.149922
9	-0.22007385	9.10929870	-2.00471844		9.00000000	3.81555556	34.75703526	0.171341
10	-0.20987898	9.11469270	-1.91298241		10.00000000	3.43400000	31.29985473	0.192827
11	-0.20009719	9.10640340	-1.82216573		11.00000000	3.12181818	28.42853571	0.214216
12	-0.18990456	9.10257340	-1.72862020		12.00000000	2.86166667	26.04853088	0.235577
13	-0.18015923	9.10442730	-1.64024661		13.00000000	2.64153846	24.04969488	0.256937
14	-0.17002539	9.10969920	-1.54888016		14.00000000	2.45285714	22.34479075	0.278420
15	-0.16017364	9.10409360	-1.45823581		15.00000000	2.28933333	20.84230495	0.299793
16	-0.15004873	9.11544420	-1.36776083		16.00000000	2.14625000	19.56402211	0.321180
17	-0.13989778	9.10195730	-1.27334362		17.00000000	2.02000000	18.38595375	0.342528
18	-0.13008174	9.11427880	-1.18560125		18.00000000	1.90777778	17.38801856	0.364002
19	-0.11989656	9.09772490	-1.09078592		19.00000000	1.80736842	16.44294069	0.385391
20	-0.11005373	9.09680370	-1.00113718		20.00000000	1.71700000	15.61921195	0.406770
21	-0.09989906	9.11671920	-0.91075169		21.00000000	1.63523810	14.90800654	0.428255
22	-0.09012098	9.09019370	-0.81921716		22.00000000	1.56090909	14.18896598	0.449636
23	-0.07999162	9.11237340	-0.72891347		23.00000000	1.49304348	13.60516968	0.470988
24	-0.07012497	9.10740280	-0.63865634		24.00000000	1.43083333	13.03117551	0.492360
25	-0.05997179	9.09018520	-0.54515465		25.00000000	1.37360000	12.48627839	0.513843
26	-0.04981935	9.10696600	-0.45370310		26.00000000	1.32076923	12.02820048	0.535228
27	-0.04000406	9.10904220	-0.36439863		27.00000000	1.27185185	11.58535219	0.556571
28	-0.02985757	9.10780050	-0.27193679		28.00000000	1.22642857	11.17006676	0.577954
29	-0.02006461	9.10160060	-0.18262004		29.00000000	1.18413793	10.77755050	0.599434
30	-0.00993971	9.11367130	-0.09058720		30.00000000	1.14466667	10.43211575	0.620820
31	-0.00065061	9.10524370	-0.00592392		31.00000000	1.10774194	10.08626028	0.642301
32	0.00949939	9.09631820	0.08640951		32.00000000	1.07312500	9.76148647	0.663674
33	0.01932780	9.10420420	0.17596425		33.00000000	1.04060606	9.47389007	0.685149
34	0.02945018	9.10984990	0.26828674		34.00000000	1.01000000	9.20094840	0.706517
35	0.03926519	9.10004520	0.35731503		35.00000000	0.98114286	8.92844435	0.727852
36	0.04939576	9.10968590	0.44997985		36.00000000	0.95388889	8.68962816	0.749225
37	0.05924724	9.10238170	0.53929097		37.00000000	0.92810811	8.44799426	0.770701
38	0.06936441	9.10737130	0.63172740		38.00000000	0.90368421	8.23018764	0.792070
39	0.07950167	9.10238840	0.72365512		39.00000000	0.88051282	8.01476968	0.813423
40	0.08935464	9.10431770	0.81351305		40.00000000	0.85850000	7.81605675	0.834799
41	0.09952391	9.09743500	0.90541229		41.00000000	0.83756098	7.61965653	0.856273
42	0.10931212	9.10602280	0.99539866		42.00000000	0.81761905	7.44525769	0.877655
43	0.11945088	9.09087750	1.08591332		43.00000000	0.79860465	7.26001705	0.899024
44	0.12926887	9.10022350	1.17637561		44.00000000	0.78045455	7.10231080	0.920389
45	0.13945377	9.10800740	1.27014597		45.00000000	0.76311111	6.95042165	0.941878
46	0.14924942	9.10733800	1.35926491		46.00000000	0.74652174	6.79882580	0.963258
47	0.15941572	9.09684750	1.45018049		47.00000000	0.73063830	6.64650517	0.984652
48	0.16953140	9.11604790	1.54545636		48.00000000	0.71541667	6.52177260	1.006031
49	0.17938511	9.09622670	1.63172763		49.00000000	0.70081633	6.37478418	1.027514
50	0.18945986	9.10102270	1.72427849		50.00000000	0.68680000	6.25058239	1.048896
51	0.19930986	9.10645870	1.81500701		51.00000000	0.67333333	6.13168219	1.070282
52	0.20947391	9.10144520	1.90651531		52.00000000	0.66038462	6.01045439	1.091761
53	0.21930009	9.09540370	1.99462285		53.00000000	0.64792453	5.89313515	1.113149
54	0.22945522	9.11411380	2.09128099		54.00000000	0.63592593	5.79590126	1.134504
55	0.23927841	9.10487940	2.17860107		55.00000000	0.62436364	5.68475561	1.155904
56	0.24941270	9.10346980	2.27052098		56.00000000	0.61321429	5.58237773	1.177387
57	0.25953731	9.09013840	2.35923007		57.00000000	0.60245614	5.47640970	1.198761
58	0.26936722	9.11664200	2.45572451		58.00000000	0.59206897	5.39768080	1.220104
59	0.27949852	9.10846610	2.54580279		59.00000000	0.58203390	5.30143603	1.241478
60	0.28933808	9.09898660	2.63268331		60.00000000	0.57233333	5.20765333	1.262951
61	0.29949322	9.10624500	2.72725864		61.00000000	0.56295082	5.12636809	1.284334
62	0.30929112	9.10206600	2.81518819		62.00000000	0.55387097	5.04137010	1.305685
63	0.31943360	9.09549240	2.90540588		63.00000000	0.54507937	4.95776522	1.327053
64	0.32925826	9.10825250	2.99896737		64.00000000	0.53656250	4.88714673	1.348518
65	0.33940521	9.09172340	3.08577829		65.00000000	0.52830769	4.80322741	1.369892
66	0.34924552	9.10468580	3.17977073		66.00000000	0.52030303	4.73719561	1.391237
67	0.35939097	9.09124950	3.26731298		67.00000000	0.51253731	4.65960459	1.412612
68	0.36953717	9.11607840	3.36872981		68.00000000	0.50500000	4.60361959	1.434092
69	0.37937227	9.09439090	3.45015972		69.00000000	0.49768116	4.52610701	1.455463
70	0.38950360	9.09856130	3.54392238		70.00000000	0.49057143	4.46349421	1.476821
71	0.39931563	9.09550380	3.63197683		71.00000000	0.48366197	4.39914930	1.498191
72	0.40947521	9.09602640	3.72459732		72.00000000	0.47694444	4.33829926	1.519663
73	0.41929543	9.09733490	3.81447095		73.00000000	0.47041096	4.27948603	1.541051
74	0.42944685	9.10223100	3.90892443		74.00000000	0.46405405	4.22392720	1.562410
75	0.43926856	9.08597760	3.99118430		75.00000000	0.45786667	4.16016628	1.583774
76	0.44941550	9.09112640	4.08569312		76.00000000	0.45184211	4.10775369	1.605242
77	0.45955127	9.08693220	4.17591123		77.00000000	0.44597403	4.05253574	1.626612
78	0.46940944	9.07787700	4.26124116		78.00000000	0.44025641	3.99659354	1.648003
79	0.47953555	9.07504840	4.35180833		79.00000000	0.43468354	3.94477420	1.669350
80	0.48936397	9.06706050	4.43709272		80.00000000	0.42925000	3.89203572	1.690827
81	0.49950570	9.05305000	4.52205008		81.00000000	0.42395062	3.83804614	1.712205
82	0.50929612	9.04291340	4.60552071		82.00000000	0.41878049	3.78699568	1.733583
83	0.51946539	9.00676350	4.67870191		83.00000000	0.41373494	3.72641275	1.755059
84	0.52925289	9.00392630	4.76535402		84.00000000	0.40880952	3.68089082	1.776448
85	0.53939384	8.95156760	4.82842042		85.00000000	0.40400000	3.61643331	1.797793
86	0.54954749	8.87913230	4.87950487		86.00000000	0.39930233	3.54545818	1.819160
87	0.55935878	8.81613640	4.93138330		87.00000000	0.39471264	3.47984051	1.840642
88	0.56948489	8.69381240	4.95099480		88.00000000	0.39022727	3.39256270	1.862034
89	0.57930809	8.50502780	4.92703141		89.00000000	0.38584270	3.28160286	1.883400
90	0.58942080	8.29030510	4.88647826		90.00000000	0.38155556	3.16321197	1.904768
91	0.59924620	7.97239070	4.77742483		91.00000000	0.37736264	3.00848238	1.926253
92	0.60936117	7.53646090	4.59242663		92.00000000	0.37326087	2.81306595	1.947636
93	0.61914194	6.93849230	4.29591158		93.00000000	0.36924731	2.56201963	1.968987
94	0.62927026	6.15503410	3.87317991		94.00000000	0.36531915	2.24855182	1.990456
95	0.63937706	5.11103060	3.26787572		95.00000000	0.36147368	1.84750306	2.011965
96	0.64918089	3.83127930	2.48719331		96.00000000	0.35770833	1.37048053	2.033343
97	0.65925413	2.16176630	1.42515336		97.00000000	0.35402062	0.76530984	2.054687
98	0.66897762	0.19619425	0.13124956		98.00000000	0.35040816	0.06874807	2.076070
99	0.67909628	-2.26285080	-1.53669356		99.00000000	0.34686869	-0.78491209	2.097554
100	0.68878776	-5.06297350	-3.48731418		100.00000000	0.34340000	-1.73862510	2.118930
101	0.69901210	-8.48651980	-5.93218003		101.00000000	0.34000000	-2.88541673	2.140298
01:41 04/04/2018
Test Lot:	JK-PERC
Recipe:	Recipe_YJX-LID
Cell Name:	3-14-4h
Test Order:	4
Test Condition:	Light
1	-0.29989347	9.11737350	-2.73424078		1.00000000	34.34000000	313.09060599	0.000000
2	-0.29009289	9.10719870	-2.64193359		2.00000000	17.17000000	156.37060168	0.061787
3	-0.27996781	9.11148260	-2.55092183		3.00000000	11.44666667	104.29610416	0.083211
4	-0.27014565	9.10646440	-2.46007174		4.00000000	8.58500000	78.17899687	0.104699
5	-0.25999603	9.10183620	-2.36644128		5.00000000	6.86800000	62.51141102	0.126093
6	-0.24984117	9.10843660	-2.27566246		6.00000000	5.72333333	52.13061881	0.147444
7	-0.23998849	9.11496730	-2.18748724		7.00000000	4.90571429	44.71542530	0.168809
8	-0.22990584	9.10928150	-2.09427702		8.00000000	4.29250000	39.10159084	0.190298
9	-0.22004424	9.10903070	-2.00438974		9.00000000	3.81555556	34.75601269	0.211721
10	-0.20989832	9.09722900	-1.90949308		10.00000000	3.43400000	31.23988439	0.233074
11	-0.20006128	9.11260410	-1.82307924		11.00000000	3.12181818	28.44789316	0.254449
12	-0.18994512	9.11707310	-1.73174354		12.00000000	2.86166667	26.09002419	0.275928
13	-0.18015049	9.11419770	-1.64192718		13.00000000	2.64153846	24.07550377	0.297311
14	-0.17002393	9.10169790	-1.54750645		14.00000000	2.45285714	22.32516471	0.318700
15	-0.16015935	9.11283300	-1.45950541		15.00000000	2.28933333	20.86231235	0.340033
16	-0.15007223	9.11385540	-1.36773660		16.00000000	2.14625000	19.56061215	0.361502
17	-0.13985859	9.10932160	-1.27401687		17.00000000	2.02000000	18.40082963	0.382870
18	-0.13004759	9.10305980	-1.18383099		18.00000000	1.90777778	17.36661520	0.404246
19	-0.11991060	9.09995370	-1.09118091		19.00000000	1.80736842	16.44696895	0.425700
20	-0.11008323	9.10558320	-1.00237201		20.00000000	1.71700000	15.63428635	0.447157
21	-0.09993806	9.09627250	-0.90906380		21.00000000	1.63523810	14.87457132	0.468517
22	-0.09007049	9.11218170	-0.82073871		22.00000000	1.56090909	14.22328725	0.489906
23	-0.07996626	9.10905930	-0.72841736		23.00000000	1.49304348	13.60022158	0.511249
24	-0.07015973	9.10049630	-0.63848833		24.00000000	1.43083333	13.02129346	0.532739
25	-0.06001157	9.11345670	-0.54691287		25.00000000	1.37360000	12.51824412	0.554132
26	-0.04982844	9.10310460	-0.45359350		26.00000000	1.32076923	12.02310046	0.575492
27	-0.04000330	9.10544110	-0.36424772		27.00000000	1.27185185	11.58077212	0.596848
28	-0.02988269	9.09860520	-0.27189080		28.00000000	1.22642857	11.15878938	0.618317
29	-0.02007616	9.09939290	-0.18268086		29.00000000	1.18413793	10.77493628	0.639700
30	-0.00994141	9.11037640	-0.09056995		30.00000000	1.14466667	10.42834419	0.661074
31	-0.00063875	9.11378860	-0.00582141		31.00000000	1.10774194	10.09572582	0.682551
32	0.00951515	9.10116390	0.08659894		32.00000000	1.07312500	9.76668651	0.704036
33	0.01934894	9.10264110	0.17612644		33.00000000	1.04060606	9.47226350	0.725419
34	0.02946926	9.10327150	0.26826670		34.00000000	1.01000000	9.19430422	0.746800
35	0.03928668	9.10324000	0.35763605		35.00000000	0.98114286	8.93157890	0.768270
36	0.04942635	9.10016920	0.44978818		36.00000000	0.95388889	8.68055029	0.789666
37	0.05926684	9.11778070	0.54038204		37.00000000	0.92810811	8.46228620	0.811015
38	0.06938493	9.10394100	0.63167634		38.00000000	0.90368421	8.22708774	0.832386
39	0.07953726	9.10281280	0.72401277		39.00000000	0.88051282	8.01514337	0.853868
40	0.08933756	9.11065480	0.81392365		40.00000000	0.85850000	7.82149715	0.875247
41	0.09949212	9.10151290	0.90552880		41.00000000	0.83756098	7.62307202	0.896588
42	0.10932516	9.11272240	0.99624983		42.00000000	0.81761905	7.45073541	0.917973
43	0.11948046	9.10326670	1.08766249		43.00000000	0.79860465	7.26991113	0.939469
44	0.12929341	9.10308650	1.17696910		44.00000000	0.78045455	7.10454524	0.960847
45	0.13943458	9.10501100	1.26955338		45.00000000	0.76311111	6.94813506	0.982199
46	0.14928176	9.10226540	1.35880220		46.00000000	0.74652174	6.79503900	1.003579
47	0.15937008	9.10301970	1.45074898		47.00000000	0.73063830	6.65101482	1.025054
48	0.16954623	9.09474850	1.54198032		48.00000000	0.71541667	6.50653466	1.046437
49	0.17937480	9.09985730	1.63228508		49.00000000	0.70081633	6.37732856	1.067778
50	0.18950109	9.10571000	1.72554197		50.00000000	0.68680000	6.25380163	1.089157
51	0.19930436	9.10735890	1.81513634		51.00000000	0.67333333	6.13228833	1.110634
52	0.20945370	9.10366730	1.90679680		52.00000000	0.66038462	6.01192183	1.132005
53	0.21926071	9.10038950	1.99535786		53.00000000	0.64792453	5.89636557	1.153361
54	0.22942941	9.10872750	2.08980998		54.00000000	0.63592593	5.79247597	1.174737
55	0.23925650	9.10025120	2.17729425		55.00000000	0.62436364	5.68186593	1.196211
56	0.24936938	9.10246750	2.26987668		56.00000000	0.61321429	5.58176311	1.217596
57	0.25955668	9.10161780	2.36238570		57.00000000	0.60245614	5.48332553	1.238956
58	0.26937708	9.11338330	2.45493658		58.00000000	0.59206897	5.39575142	1.260311
59	0.27950558	9.09980010	2.54344490		59.00000000	0.58203390	5.29639213	1.281792
60	0.28936097	9.10343170	2.63417783		60.00000000	0.57233333	5.21019741	1.303176
61	0.29948202	9.09633450	2.72418863		61.00000000	0.56295082	5.12078896	1.324568
62	0.30927414	9.10533620	2.81604502		62.00000000	0.55387097	5.04318137	1.345908
63	0.31942648	9.10627750	2.90878617		63.00000000	0.54507937	4.96364396	1.367379
64	0.32927290	9.11392880	3.00096977		64.00000000	0.53656250	4.89019242	1.388761
65	0.33942747	9.09575840	3.08735026		65.00000000	0.52830769	4.80535913	1.410143
66	0.34923893	9.11043930	3.18172007		66.00000000	0.52030303	4.74018918	1.431625
67	0.35937861	9.10141090	3.27085240		67.00000000	0.51253731	4.66481269	1.453014
68	0.36956963	9.09528920	3.36134266		68.00000000	0.50500000	4.59312105	1.474364
69	0.37938184	9.11316010	3.45736745		69.00000000	0.49768116	4.53544808	1.495746
70	0.38951853	9.08993050	3.54069637		70.00000000	0.49057143	4.45926019	1.517222
71	0.39931437	9.10883900	3.63729031		71.00000000	0.48366197	4.40559903	1.538593
72	0.40947637	9.10135940	3.72679161		72.00000000	0.47694444	4.34084280	1.559931
73	0.41930047	9.08711530	3.81023172		73.00000000	0.47041096	4.27467862	1.581308
74	0.42943421	9.11007600	3.91217829		74.00000000	0.46405405	4.22756770	1.602786
75	0.43927988	9.08735560	3.99189248		75.00000000	0.45786667	4.16079722	1.624170
76	0.44940767	9.07652760	4.07906112		76.00000000	0.45184211	4.10115734	1.645525
77	0.45956445	9.09745600	4.18086736		77.00000000	0.44597403	4.05722908	1.666890
78	0.46942800	9.07226750	4.25877639		78.00000000	0.44025641	3.99412392	1.688366
79	0.47955281	9.07534120	4.35210537		79.00000000	0.43468354	3.94490148	1.709732
80	0.48938659	9.07424640	4.44081450		80.00000000	0.42925000	3.89512027	1.731068
81	0.49951512	9.05640790	4.52381268		81.00000000	0.42395062	3.83946972	1.752447
82	0.50932956	9.04367260	4.60620979		82.00000000	0.41878049	3.78731362	1.773928
83	0.51943272	9.01315400	4.68172710		83.00000000	0.41373494	3.72905673	1.795313
84	0.52925390	8.99489780	4.76058474		84.00000000	0.40880952	3.67719989	1.816674
85	0.53938758	8.94860840	4.82676823		85.00000000	0.40400000	3.61523779	1.838051
86	0.54955035	8.89206700	4.88663853		86.00000000	0.39930233	3.55062303	1.859524
87	0.55937594	8.80599400	4.92586117		87.00000000	0.39471264	3.47583717	1.880907
88	0.56948733	8.68962380	4.94863066		88.00000000	0.39022727	3.39092820	1.902273
89	0.57931000	8.51534560	4.93302486		89.00000000	0.38584270	3.28558391	1.923642
90	0.58942211	8.29495240	4.88922835		90.00000000	0.38155556	3.16498517	1.945116
91	0.59923881	7.96158700	4.77089192		91.00000000	0.37736264	3.00440547	1.966494
92	0.60938293	7.52055070	4.58289522		92.00000000	0.37326087	2.80712729	1.987981
93	0.61915272	6.93934730	4.29651576		93.00000000	0.36924731	2.56233534	2.009351
94	0.62925738	6.15113930	3.87064980		94.00000000	0.36531915	2.24712897	2.030849
95	0.63942236	5.10822390	3.26631258		95.00000000	0.36147368	1.84648851	2.052247
96	0.64918321	3.83732370	2.49112612		96.00000000	0.35770833	1.37264267	2.073633
97	0.65927452	2.16520260	1.42746290		97.00000000	0.35402062	0.76652636	2.095123
98	0.66900039	0.20434928	0.13670975		98.00000000	0.35040816	0.07160566	2.116516
99	0.67911702	-2.24451900	-1.52429105		99.00000000	0.34686869	-0.77855336	2.137866
100	0.68879974	-5.04091550	-3.47218129		100.00000000	0.34340000	-1.73105038	2.159234
101	0.69906813	-8.46888350	-5.92032655		101.00000000	0.34000000	-2.87942039	2.180717
