# Supplementary material for: Study on the Electrical Injection Regeneration of Industrialized B-Doped Czochralski Silicon PERC Solar Cells
Source: Hindawi journal article supplement (doi:10.1155/2019/5357370), 2019-06-20
Supplement: f1 [file 5357370.f1.zip › section3.3/IVRawData_3-14-5h.csv]

02:43 04/04/2018
Test Lot:	JK-PERC
Recipe:	Recipe_YJX-LID
Cell Name:	3-14-5h
Test Order:	2
Test Condition:	Light
1	-0.29990995	9.11946770	-2.73501910		1.00000000	34.34000000	313.16252082	0.000000
2	-0.29009846	9.12362670	-2.64675006		2.00000000	17.17000000	156.65267044	0.061783
3	-0.27997065	9.11649320	-2.55235053		3.00000000	11.44666667	104.35345883	0.083186
4	-0.27015617	9.12582300	-2.46539739		4.00000000	8.58500000	78.34519046	0.104630
5	-0.25997999	9.10989670	-2.36839085		5.00000000	6.86800000	62.56677054	0.126131
6	-0.24980156	9.11878970	-2.27788789		6.00000000	5.72333333	52.18987305	0.147515
7	-0.24001759	9.11390020	-2.18749636		7.00000000	4.90571429	44.71019041	0.168892
8	-0.22985928	9.11619000	-2.09544087		8.00000000	4.29250000	39.13124558	0.190228
9	-0.22003587	9.12654400	-2.00816705		9.00000000	3.81555556	34.82283566	0.211701
10	-0.20988424	9.11889840	-1.91391306		10.00000000	3.43400000	31.31429711	0.233063
11	-0.20007870	9.12212750	-1.82514341		11.00000000	3.12181818	28.47762349	0.254447
12	-0.18992855	9.11606120	-1.73140029		12.00000000	2.86166667	26.08712847	0.275857
13	-0.18013416	9.11366270	-1.64168197		13.00000000	2.64153846	24.07409055	0.297328
14	-0.16997956	9.11967750	-1.55015877		14.00000000	2.45285714	22.36926610	0.318713
15	-0.16017997	9.11219790	-1.45959159		15.00000000	2.28933333	20.86085839	0.340072
16	-0.15002313	9.12242510	-1.36857477		16.00000000	2.14625000	19.57900487	0.361448
17	-0.13987598	9.11556240	-1.27504822		17.00000000	2.02000000	18.41343605	0.382924
18	-0.13005629	9.12080100	-1.18621754		18.00000000	1.90777778	17.40046146	0.404339
19	-0.11989573	9.12049580	-1.09350850		19.00000000	1.80736842	16.48409609	0.425701
20	-0.11007901	9.12058730	-1.00398522		20.00000000	1.71700000	15.66004839	0.447067
21	-0.09992813	9.11560250	-0.91090514		21.00000000	1.63523810	14.90618047	0.468546
22	-0.09013226	9.11845110	-0.82186660		22.00000000	1.56090909	14.23307322	0.489914
23	-0.07998808	9.11572740	-0.72914951		23.00000000	1.49304348	13.61017734	0.511301
24	-0.07018551	9.11619950	-0.63982507		24.00000000	1.43083333	13.04376212	0.532657
25	-0.06001453	9.10969640	-0.54671412		25.00000000	1.37360000	12.51307898	0.554127
26	-0.04986141	9.13434410	-0.45545129		26.00000000	1.32076923	12.06436063	0.575505
27	-0.04005587	9.11134340	-0.36496276		27.00000000	1.27185185	11.58827898	0.596886
28	-0.02992582	9.10766030	-0.27255423		28.00000000	1.22642857	11.16989481	0.618365
29	-0.02009050	9.12516020	-0.18332907		29.00000000	1.18413793	10.80544832	0.639734
30	-0.00995897	9.11146160	-0.09074080		30.00000000	1.14466667	10.42958638	0.661094
31	-0.00068259	9.11002160	-0.00621840		31.00000000	1.10774194	10.09155296	0.682586
32	0.00945618	9.11051080	0.08615061		32.00000000	1.07312500	9.77671690	0.704064
33	0.01929122	9.12249470	0.17598402		33.00000000	1.04060606	9.49292327	0.725437
34	0.02943213	9.10962100	0.26811558		34.00000000	1.01000000	9.20071721	0.746794
35	0.03925080	9.12554550	0.35818495		35.00000000	0.98114286	8.95346378	0.768171
36	0.04939990	9.10765170	0.44991709		36.00000000	0.95388889	8.68768776	0.789681
37	0.05921410	9.12370680	0.54025212		37.00000000	0.92810811	8.46778626	0.811067
38	0.06940116	9.11402510	0.63252391		38.00000000	0.90368421	8.23620058	0.832420
39	0.07955622	9.11930370	0.72549732		39.00000000	0.88051282	8.02966382	0.853789
40	0.08936074	9.10848810	0.81394127		40.00000000	0.85850000	7.81963703	0.875270
41	0.09950836	9.12290570	0.90780538		41.00000000	0.83756098	7.64098980	0.896660
42	0.10931809	9.11313060	0.99623003		42.00000000	0.81761905	7.45106916	0.918017
43	0.11946274	9.10947420	1.08824275		43.00000000	0.79860465	7.27486847	0.939389
44	0.12928958	9.12223820	1.17941035		44.00000000	0.78045455	7.11949227	0.960864
45	0.13943571	9.11035350	1.27030861		45.00000000	0.76311111	6.95221198	0.982243
46	0.14925587	9.11496640	1.36046224		46.00000000	0.74652174	6.80452057	1.003607
47	0.15939009	9.12142660	1.45386501		47.00000000	0.73063830	6.66446361	1.024983
48	0.16956523	9.11430070	1.54546849		48.00000000	0.71541667	6.52052263	1.046455
49	0.17938465	9.12823300	1.63746488		49.00000000	0.70081633	6.39721472	1.067837
50	0.18953227	9.10486980	1.72566664		50.00000000	0.68680000	6.25322458	1.089183
51	0.19930255	9.12798880	1.81923144		51.00000000	0.67333333	6.14617913	1.110560
52	0.20946059	9.11913870	1.91010017		52.00000000	0.66038462	6.02213890	1.132047
53	0.21927181	9.10975650	1.99751280		53.00000000	0.64792453	5.90243468	1.153421
54	0.22940677	9.12096310	2.09241068		54.00000000	0.63592593	5.80025690	1.174808
55	0.23924330	9.11491780	2.18068301		55.00000000	0.62436364	5.69102322	1.196154
56	0.24936412	9.11084270	2.27191727		56.00000000	0.61321429	5.58689890	1.217627
57	0.25953779	9.12272360	2.36769152		57.00000000	0.60245614	5.49604085	1.238996
58	0.26933116	9.10760690	2.45296233		58.00000000	0.59206897	5.39233140	1.260379
59	0.27949366	9.11028670	2.54626737		59.00000000	0.58203390	5.30249568	1.281856
60	0.28931379	9.12137700	2.63894015		60.00000000	0.57233333	5.22046810	1.303228
61	0.29944801	9.10335250	2.72598079		61.00000000	0.56295082	5.12473975	1.324571
62	0.30928156	9.11442090	2.81892231		62.00000000	0.55387097	5.04821312	1.345948
63	0.31941357	9.10680200	2.90883614		63.00000000	0.54507937	4.96392985	1.367429
64	0.32925454	9.11599920	3.00148412		64.00000000	0.53656250	4.89130332	1.388801
65	0.33936495	9.11542030	3.09345415		65.00000000	0.52830769	4.81574666	1.410175
66	0.34924167	9.12003140	3.18509500		66.00000000	0.52030303	4.74517997	1.431548
67	0.35937664	9.11386680	3.27531083		67.00000000	0.51253731	4.67119680	1.453027
68	0.36951086	9.11364940	3.36759243		68.00000000	0.50500000	4.60239295	1.474414
69	0.37935036	9.10849760	3.45531184		69.00000000	0.49768116	4.53312765	1.495766
70	0.38950840	9.11103440	3.54882443		70.00000000	0.49057143	4.46961316	1.517137
71	0.39933375	9.11745830	3.64090881		71.00000000	0.48366197	4.40976786	1.538623
72	0.40943968	9.09597110	3.72425150		72.00000000	0.47694444	4.33827288	1.560005
73	0.41929260	9.12415030	3.82568870		73.00000000	0.47041096	4.29210029	1.581358
74	0.42945361	9.09979920	3.90794162		74.00000000	0.46405405	4.22279871	1.602742
75	0.43927673	9.10847950	4.00114309		75.00000000	0.45786667	4.17046915	1.624221
76	0.44942063	9.09753130	4.08861825		76.00000000	0.45184211	4.11064770	1.645609
77	0.45953995	9.11076930	4.18676247		77.00000000	0.44597403	4.06316646	1.666959
78	0.46940699	9.09566690	4.26956962		78.00000000	0.44025641	4.00442566	1.688332
79	0.47951964	9.08281330	4.35538736		79.00000000	0.43468354	3.94814948	1.709796
80	0.48936883	9.07398130	4.44052361		80.00000000	0.42925000	3.89500647	1.731180
81	0.49948665	9.06627940	4.52848553		81.00000000	0.42395062	3.84365475	1.752541
82	0.50931871	9.05699350	4.61289625		82.00000000	0.41878049	3.79289216	1.773910
83	0.51947081	9.02986240	4.69074994		83.00000000	0.41373494	3.73596958	1.795398
84	0.52924258	9.01831820	4.77287799		84.00000000	0.40880952	3.68677437	1.816776
85	0.53939021	8.94266320	4.82358498		85.00000000	0.40400000	3.61283593	1.838172
86	0.54952365	8.90122410	4.89143316		86.00000000	0.39930233	3.55427948	1.859523
87	0.55932301	8.79791360	4.92087552		87.00000000	0.39471264	3.47264774	1.880990
88	0.56950039	8.68828110	4.94797947		88.00000000	0.39022727	3.39040424	1.902371
89	0.57928407	8.49773030	4.92259979		89.00000000	0.38584270	3.27878717	1.923757
90	0.58940715	8.27086160	4.87490496		90.00000000	0.38155556	3.15579319	1.945236
91	0.59920269	7.95956520	4.76939288		91.00000000	0.37736264	3.00364252	1.966607
92	0.60933471	7.50013920	4.57009514		92.00000000	0.37326087	2.79950848	1.988066
93	0.61911762	6.91067080	4.27851806		93.00000000	0.36924731	2.55174662	2.009486
94	0.62922657	6.11537690	3.84795763		94.00000000	0.36531915	2.23406428	2.030968
95	0.63935781	5.06085920	3.23569985		95.00000000	0.36147368	1.82936742	2.052342
96	0.64913774	3.78940770	2.45984755		96.00000000	0.35770833	1.35550271	2.073700
97	0.65926158	2.14576130	1.41461798		97.00000000	0.35402062	0.75964374	2.095071
98	0.66894108	0.20314249	0.13589036		98.00000000	0.35040816	0.07118279	2.116583
99	0.67902988	-2.19435740	-1.49003424		99.00000000	0.34686869	-0.76115387	2.137985
100	0.68879199	-4.92027520	-3.38904615		100.00000000	0.34340000	-1.68962250	2.159345
101	0.69903636	-8.21606160	-5.74332579		101.00000000	0.34000000	-2.79346094	2.180730
02:43 04/04/2018
Test Lot:	JK-PERC
Recipe:	Recipe_YJX-LID
Cell Name:	3-14-5h
Test Order:	3
Test Condition:	Light
1	-0.29990920	9.11277390	-2.73300473		1.00000000	34.34000000	312.93265573	0.000000
2	-0.29007167	9.12897680	-2.64805755		2.00000000	17.17000000	156.74453166	0.021588
3	-0.27995801	9.10440730	-2.54885175		3.00000000	11.44666667	104.21511556	0.042989
4	-0.27017403	9.11870960	-2.46363852		4.00000000	8.58500000	78.28412192	0.064358
5	-0.26001051	9.11317920	-2.36952237		5.00000000	6.86800000	62.58931475	0.085729
6	-0.24982686	9.12517170	-2.27971299		6.00000000	5.72333333	52.22639936	0.107218
7	-0.24003026	9.10132980	-2.18459456		7.00000000	4.90571429	44.64852362	0.128585
8	-0.22988905	9.11426350	-2.09526938		8.00000000	4.29250000	39.12297607	0.150012
9	-0.22007829	9.12371830	-2.00793232		9.00000000	3.81555556	34.81205405	0.171358
10	-0.20992070	9.13156890	-1.91690534		10.00000000	3.43400000	31.35780760	0.192835
11	-0.20009358	9.11078070	-1.82300873		11.00000000	3.12181818	28.44220084	0.214264
12	-0.18998511	9.12582970	-1.73377176		12.00000000	2.86166667	26.11508266	0.235662
13	-0.18016170	9.11368470	-1.64193693		13.00000000	2.64153846	24.07414866	0.257147
14	-0.17004208	9.11775490	-1.55040201		14.00000000	2.45285714	22.36455023	0.278532
15	-0.16018666	9.12304590	-1.46139025		15.00000000	2.28933333	20.88569308	0.299869
16	-0.15005514	9.11054710	-1.36708442		16.00000000	2.14625000	19.55351171	0.321232
17	-0.13988192	9.11430070	-1.27492588		17.00000000	2.02000000	18.41088741	0.342715
18	-0.13011210	9.12143710	-1.18680934		18.00000000	1.90777778	17.40167500	0.364093
19	-0.11993666	9.10701080	-1.09226446		19.00000000	1.80736842	16.45972373	0.385448
20	-0.11013111	9.13917730	-1.00650774		20.00000000	1.71700000	15.69196742	0.406831
21	-0.09998172	9.10498330	-0.91033187		21.00000000	1.63523810	14.88881555	0.428305
22	-0.09013896	9.13495160	-0.82341501		22.00000000	1.56090909	14.25882900	0.449689
23	-0.07997989	9.11548900	-0.72905580		23.00000000	1.49304348	13.60982140	0.471038
24	-0.07012448	9.11993790	-0.63953088		24.00000000	1.43083333	13.04911115	0.492409
25	-0.05999295	9.12060740	-0.54717212		25.00000000	1.37360000	12.52806632	0.513889
26	-0.04981527	9.11957070	-0.45429389		26.00000000	1.32076923	12.04484838	0.535265
27	-0.04004470	9.12434580	-0.36538172		27.00000000	1.27185185	11.60481610	0.556608
28	-0.02989680	9.11583420	-0.27253424		28.00000000	1.22642857	11.17991952	0.577993
29	-0.02009497	9.12434770	-0.18335349		29.00000000	1.18413793	10.80448621	0.599471
30	-0.00992102	9.12276840	-0.09050713		30.00000000	1.14466667	10.44252890	0.620845
31	-0.00068482	9.12021830	-0.00624573		31.00000000	1.10774194	10.10284827	0.642324
32	0.00948371	9.12404350	0.08652982		32.00000000	1.07312500	9.79123918	0.663706
33	0.01929717	9.10472110	0.17569535		33.00000000	1.04060606	9.47442796	0.685178
34	0.02943660	9.11758520	0.26839070		34.00000000	1.01000000	9.20876105	0.706547
35	0.03926420	9.12250140	0.35818767		35.00000000	0.98114286	8.95047709	0.727918
36	0.04942744	9.11060430	0.45031384		36.00000000	0.95388889	8.69050421	0.749278
37	0.05924313	9.11164570	0.53980239		37.00000000	0.92810811	8.45659225	0.770756
38	0.06936619	9.12269880	0.63280683		38.00000000	0.90368421	8.24403886	0.792130
39	0.07951827	9.11614990	0.72490043		39.00000000	0.88051282	8.02688686	0.813516
40	0.08932205	9.11313250	0.81400363		40.00000000	0.85850000	7.82362425	0.834857
41	0.09947263	9.11819740	0.90701111		41.00000000	0.83756098	7.63704631	0.856326
42	0.10926749	9.11168580	0.99561104		42.00000000	0.81761905	7.44988787	0.877714
43	0.11943743	9.11296370	1.08842896		43.00000000	0.79860465	7.27765520	0.899102
44	0.12926428	9.11974140	1.17885681		44.00000000	0.78045455	7.11754363	0.920569
45	0.13941860	9.11277680	1.27049058		45.00000000	0.76311111	6.95406123	0.941966
46	0.14924544	9.12111470	1.36128478		46.00000000	0.74652174	6.80911041	0.963323
47	0.15941316	9.11761670	1.45346809		47.00000000	0.73063830	6.66167995	0.984699
48	0.16953696	9.11767010	1.54578207		48.00000000	0.71541667	6.52293315	1.006180
49	0.17938241	9.12179090	1.63628884		49.00000000	0.70081633	6.39269999	1.027554
50	0.18947197	9.10828590	1.72576487		50.00000000	0.68680000	6.25557076	1.048910
51	0.19928841	9.12141700	1.81779269		51.00000000	0.67333333	6.14175411	1.070285
52	0.20943230	9.11301710	1.90856013		52.00000000	0.66038462	6.01809629	1.091754
53	0.21923386	9.11768150	1.99890451		53.00000000	0.64792453	5.90756949	1.113143
54	0.22940379	9.11925700	2.09199212		54.00000000	0.63592593	5.79917195	1.134486
55	0.23922767	9.10971640	2.17929623		55.00000000	0.62436364	5.68777566	1.155862
56	0.24938644	9.11949730	2.27427897		56.00000000	0.61321429	5.59220602	1.177352
57	0.25955194	9.11180590	2.36498690		57.00000000	0.60245614	5.48946341	1.198717
58	0.26932147	9.11769200	2.45559021		58.00000000	0.59206897	5.39830247	1.220083
59	0.27951151	9.11091610	2.54660592		59.00000000	0.58203390	5.30286201	1.241456
60	0.28933316	9.11284070	2.63664700		60.00000000	0.57233333	5.21558249	1.262934
61	0.29947332	9.11035060	2.72830694		61.00000000	0.56295082	5.12867934	1.284320
62	0.30926520	9.12402530	2.82174351		62.00000000	0.55387097	5.05353272	1.305672
63	0.31946567	9.11121460	2.91072028		63.00000000	0.54507937	4.96633507	1.327052
64	0.32925379	9.11101440	2.99983602		64.00000000	0.53656250	4.88862866	1.348523
65	0.33942151	9.11736770	3.09463071		65.00000000	0.52830769	4.81677549	1.369887
66	0.34923571	9.11910060	3.18471557		66.00000000	0.52030303	4.74469568	1.391257
67	0.35935432	9.09850120	3.26958571		67.00000000	0.51253731	4.66332136	1.412618
68	0.36955476	9.11670680	3.36912239		68.00000000	0.50500000	4.60393693	1.434093
69	0.37935928	9.11600300	3.45824033		69.00000000	0.49768116	4.53686294	1.455468
70	0.38951287	9.08758640	3.53973186		70.00000000	0.49057143	4.45811024	1.476863
71	0.39935830	9.12889670	3.64570067		71.00000000	0.48366197	4.41530018	1.498208
72	0.40946350	9.10528850	3.72828330		72.00000000	0.47694444	4.34271677	1.519674
73	0.41925240	9.10000320	3.81519818		73.00000000	0.47041096	4.28074123	1.541058
74	0.42940745	9.10221580	3.90855928		74.00000000	0.46405405	4.22392014	1.562445
75	0.43925440	9.10174850	3.99798308		75.00000000	0.45786667	4.16738725	1.583905
76	0.44937748	9.09909150	4.08892681		76.00000000	0.45184211	4.11135266	1.605289
77	0.45953700	9.11290550	4.18771725		77.00000000	0.44597403	4.06411915	1.626633
78	0.46942413	9.08043000	4.26257295		78.00000000	0.44025641	3.99771752	1.648016
79	0.47957471	9.10499290	4.36652433		79.00000000	0.43468354	3.95779058	1.669491
80	0.48937774	9.07790850	4.44252635		80.00000000	0.42925000	3.89669222	1.690868
81	0.49948964	9.07546330	4.53309990		81.00000000	0.42395062	3.84754827	1.712237
82	0.50930977	9.05100060	4.60976303		82.00000000	0.41878049	3.79038245	1.733608
83	0.51945591	9.03464030	4.69309730		83.00000000	0.41373494	3.73794636	1.755077
84	0.52924854	8.99469660	4.76043004		84.00000000	0.40880952	3.67711763	1.776452
85	0.53937232	8.97352120	4.84006895		85.00000000	0.40400000	3.62530256	1.797790
86	0.54951328	8.88814350	4.88415289		86.00000000	0.39930233	3.54905637	1.819155
87	0.55935502	8.81311420	4.92965967		87.00000000	0.39471264	3.47864760	1.840642
88	0.56945127	8.68796440	4.94737236		88.00000000	0.39022727	3.39028065	1.862021
89	0.57927883	8.51811890	4.93436595		89.00000000	0.38584270	3.28665397	1.883360
90	0.58942348	8.28793330	4.88510249		90.00000000	0.38155556	3.16230699	1.904736
91	0.59920496	7.96179490	4.77074699		91.00000000	0.37736264	3.00448392	1.926221
92	0.60936296	7.51306820	4.57818548		92.00000000	0.37326087	2.80433437	1.947609
93	0.61912358	6.93221810	4.29189969		93.00000000	0.36924731	2.55970290	1.968969
94	0.62925112	6.12346840	3.85319935		94.00000000	0.36531915	2.23702026	1.990437
95	0.63935930	5.08744910	3.25270790		95.00000000	0.36147368	1.83897897	2.011942
96	0.64914745	3.80122610	2.46755623		96.00000000	0.35770833	1.35973025	2.033322
97	0.65923703	2.14507370	1.41411202		97.00000000	0.35402062	0.75940032	2.054688
98	0.66897160	0.19478436	0.13030520		98.00000000	0.35040816	0.06825403	2.076057
99	0.67907602	-2.22577950	-1.51147348		99.00000000	0.34686869	-0.77205321	2.097529
100	0.68880612	-4.98690030	-3.43500745		100.00000000	0.34340000	-1.71250156	2.118898
101	0.69902223	-8.33700180	-5.82774959		101.00000000	0.34000000	-2.83458061	2.140274
02:43 04/04/2018
Test Lot:	JK-PERC
Recipe:	Recipe_YJX-LID
Cell Name:	3-14-5h
Test Order:	4
Test Condition:	Light
1	-0.29993501	9.12034320	-2.73551023		1.00000000	34.34000000	313.19258549	0.000000
2	-0.29010996	9.11920640	-2.64557260		2.00000000	17.17000000	156.57677389	0.061784
3	-0.27997825	9.11096860	-2.55087304		3.00000000	11.44666667	104.29022057	0.083186
4	-0.27015617	9.11129280	-2.46147197		4.00000000	8.58500000	78.22044869	0.104682
5	-0.26002151	9.12426280	-2.37250459		5.00000000	6.86800000	62.66543691	0.126082
6	-0.24981165	9.12353710	-2.27916586		6.00000000	5.72333333	52.21704400	0.147476
7	-0.24001414	9.10568520	-2.18549320		7.00000000	4.90571429	44.66988997	0.168820
8	-0.22986011	9.12276650	-2.09696011		8.00000000	4.29250000	39.15947520	0.190331
9	-0.22006407	9.11016940	-2.00482096		9.00000000	3.81555556	34.76035747	0.211703
10	-0.20991229	9.12294960	-1.91501924		10.00000000	3.43400000	31.32820893	0.233081
11	-0.20010062	9.11798480	-1.82451441		11.00000000	3.12181818	28.46469073	0.254571
12	-0.18996966	9.11187840	-1.73098044		12.00000000	2.86166667	26.07515869	0.275946
13	-0.18016768	9.12121770	-1.64334863		13.00000000	2.64153846	24.09404737	0.297293
14	-0.17001440	9.11352350	-1.54943023		14.00000000	2.45285714	22.35417121	0.318675
15	-0.16020943	9.13219360	-1.46306353		15.00000000	2.28933333	20.90663521	0.340150
16	-0.15006061	9.11561300	-1.36789445		16.00000000	2.14625000	19.56438440	0.361529
17	-0.13989468	9.11471560	-1.27510022		17.00000000	2.02000000	18.41172551	0.382890
18	-0.13007259	9.11833000	-1.18604480		18.00000000	1.90777778	17.39574734	0.404269
19	-0.11994760	9.11728190	-1.09359608		19.00000000	1.80736842	16.47828739	0.425746
20	-0.11010691	9.11598400	-1.00373283		20.00000000	1.71700000	15.65214453	0.447120
21	-0.09995660	9.11414620	-0.91101908		21.00000000	1.63523810	14.90379907	0.468470
22	-0.09011294	9.12802510	-0.82255317		22.00000000	1.56090909	14.24801736	0.489853
23	-0.08000803	9.10289670	-0.72830483		23.00000000	1.49304348	13.59102055	0.511330
24	-0.07015915	9.11647130	-0.63960390		24.00000000	1.43083333	13.04415102	0.532703
25	-0.06003341	9.10501100	-0.54660487		25.00000000	1.37360000	12.50664311	0.554063
26	-0.04983920	9.13291450	-0.45517711		26.00000000	1.32076923	12.06247246	0.575449
27	-0.04002084	9.11942010	-0.36496681		27.00000000	1.27185185	11.59855134	0.596927
28	-0.02989435	9.11588670	-0.27251347		28.00000000	1.22642857	11.17998390	0.618309
29	-0.02006333	9.12591360	-0.18309623		29.00000000	1.18413793	10.80634045	0.639679
30	-0.00993387	9.11001590	-0.09049769		30.00000000	1.14466667	10.42793153	0.661059
31	-0.00065808	9.12475400	-0.00600478		31.00000000	1.10774194	10.10787266	0.682659
32	0.00948309	9.12127780	0.08649790		32.00000000	1.07312500	9.78827124	0.704039
33	0.01929894	9.11680510	0.17594467		33.00000000	1.04060606	9.48700264	0.725409
34	0.02944300	9.11411290	0.26834683		34.00000000	1.01000000	9.20525403	0.746763
35	0.03927448	9.11112400	0.35783462		35.00000000	0.98114286	8.93931423	0.768244
36	0.04943863	9.12489410	0.45112229		36.00000000	0.95388889	8.70413509	0.789637
37	0.05921057	9.10959340	0.53938424		37.00000000	0.92810811	8.45468750	0.811015
38	0.06937398	9.12241270	0.63285808		38.00000000	0.90368421	8.24378032	0.832352
39	0.07953591	9.10987570	0.72456224		39.00000000	0.88051282	8.02136235	0.853818
40	0.08935622	9.12310790	0.81520645		40.00000000	0.85850000	7.83218813	0.875195
41	0.09951368	9.11347680	0.90691561		41.00000000	0.83756098	7.63309252	0.896584
42	0.10932729	9.11276630	0.99627404		42.00000000	0.81761905	7.45077130	0.918066
43	0.11945201	9.12995720	1.09059174		43.00000000	0.79860465	7.29122628	0.939458
44	0.12930581	9.12040140	1.17932089		44.00000000	0.78045455	7.11805873	0.960804
45	0.13941266	9.12214370	1.27174232		45.00000000	0.76311111	6.96120921	0.982187
46	0.14925531	9.11439990	1.36037258		46.00000000	0.74652174	6.80409766	1.003669
47	0.15941276	9.12719730	1.45499171		47.00000000	0.73063830	6.66867990	1.025056
48	0.16951142	9.10261630	1.54299741		48.00000000	0.71541667	6.51216341	1.046400
49	0.17935778	9.12025260	1.63578826		49.00000000	0.70081633	6.39162192	1.067767
50	0.18951227	9.10334010	1.72519465		50.00000000	0.68680000	6.25217398	1.089238
51	0.19929090	9.11863900	1.81726177		51.00000000	0.67333333	6.13988359	1.110596
52	0.20945282	9.10150810	1.90633654		52.00000000	0.66038462	6.01049593	1.131952
53	0.21927239	9.12591170	2.00106047		53.00000000	0.64792453	5.91290203	1.153340
54	0.22940901	9.10528090	2.08883348		54.00000000	0.63592593	5.79028419	1.174821
55	0.23923454	9.11551950	2.18074711		55.00000000	0.62436364	5.69139890	1.196221
56	0.24938604	9.12874410	2.27658134		56.00000000	0.61321429	5.59787629	1.217583
57	0.25953606	9.10894780	2.36410042		57.00000000	0.60245614	5.48774153	1.238949
58	0.26934519	9.11823370	2.45595239		58.00000000	0.59206897	5.39862319	1.260438
59	0.27947736	9.10471530	2.54456180		59.00000000	0.58203390	5.29925294	1.281820
60	0.28933638	9.12288950	2.63958382		60.00000000	0.57233333	5.22133376	1.303168
61	0.29948491	9.10693650	2.72739006		61.00000000	0.56295082	5.12675737	1.324546
62	0.30929255	9.11632250	2.81961063		62.00000000	0.55387097	5.04926637	1.346022
63	0.31945971	9.10733410	2.90942631		63.00000000	0.54507937	4.96421989	1.367390
64	0.32926065	9.11376570	3.00080442		64.00000000	0.53656250	4.89010491	1.388771
65	0.33941588	9.11651610	3.09429033		65.00000000	0.52830769	4.81632558	1.410129
66	0.34926596	9.11560820	3.18377165		66.00000000	0.52030303	4.74287857	1.431611
67	0.35937133	9.10838510	3.27329247		67.00000000	0.51253731	4.66838723	1.453011
68	0.36953920	9.11759760	3.36930972		68.00000000	0.50500000	4.60438679	1.474399
69	0.37935579	9.11000440	3.45593292		69.00000000	0.49768116	4.53387755	1.495738
70	0.38948795	9.11650750	3.55076982		70.00000000	0.49057143	4.47229811	1.517214
71	0.39931199	9.11090850	3.63809500		71.00000000	0.48366197	4.40659997	1.538590
72	0.40946051	9.11267280	3.73127965		72.00000000	0.47694444	4.34623867	1.559966
73	0.41929051	9.09998230	3.81553622		73.00000000	0.47041096	4.28073140	1.581490
74	0.42945912	9.12510780	3.91886077		74.00000000	0.46405405	4.23454327	1.602860
75	0.43927348	9.09300330	3.99431520		75.00000000	0.45786667	4.16338311	1.624220
76	0.44939372	9.11548610	4.09644221		76.00000000	0.45184211	4.11876043	1.645590
77	0.45953855	9.08887290	4.17668747		77.00000000	0.44597403	4.05340124	1.667058
78	0.46940351	9.10391900	4.27341153		78.00000000	0.44025641	4.00805870	1.688454
79	0.47954980	9.08460330	4.35651970		79.00000000	0.43468354	3.94892756	1.709802
80	0.48934704	9.08063510	4.44358191		80.00000000	0.42925000	3.89786262	1.731173
81	0.49949333	9.06762790	4.52921965		81.00000000	0.42395062	3.84422645	1.752650
82	0.50932258	9.05151650	4.61014174		82.00000000	0.41878049	3.79059850	1.774020
83	0.51947558	9.03964710	4.69587592		83.00000000	0.41373494	3.74001785	1.795363
84	0.52926093	9.01288510	4.77016795		84.00000000	0.40880952	3.68455327	1.816742
85	0.53936034	8.95745470	4.83129581		85.00000000	0.40400000	3.61881170	1.838212
86	0.54950064	8.88507460	4.88235418		86.00000000	0.39930233	3.54783095	1.859588
87	0.55934405	8.81092930	4.92834088		87.00000000	0.39471264	3.47778520	1.880942
88	0.56946725	8.68233970	4.94430811		88.00000000	0.39022727	3.38808574	1.902328
89	0.57925332	8.52135370	4.93602242		89.00000000	0.38584270	3.28790209	1.923864
90	0.58941674	8.27285290	4.87615799		90.00000000	0.38155556	3.15655298	1.945240
91	0.59924603	7.96575360	4.77344622		91.00000000	0.37736264	3.00597779	1.966599
92	0.60935062	7.51270200	4.57786962		92.00000000	0.37326087	2.80419768	1.988078
93	0.61914563	6.92968130	4.29048189		93.00000000	0.36924731	2.55876619	2.009591
94	0.62924802	6.11132670	3.84554023		94.00000000	0.36531915	2.23258467	2.030976
95	0.63938832	5.09005980	3.25452478		95.00000000	0.36147368	1.83992267	2.052364
96	0.64913869	3.79951170	2.46641005		96.00000000	0.35770833	1.35911700	2.073725
97	0.65925896	2.14536090	1.41434840		97.00000000	0.35402062	0.75950199	2.095208
98	0.66897506	0.19051500	0.12744978		98.00000000	0.35040816	0.06675801	2.116590
99	0.67909753	-2.23544760	-1.51808694		99.00000000	0.34686869	-0.77540677	2.137966
100	0.68879950	-5.00722650	-3.44897511		100.00000000	0.34340000	-1.71948158	2.159307
101	0.69903809	-8.35125160	-5.83784297		101.00000000	0.34000000	-2.83942554	2.180778
