# Supplementary material for: Study on the Electrical Injection Regeneration of Industrialized B-Doped Czochralski Silicon PERC Solar Cells
Source: Hindawi journal article supplement (doi:10.1155/2019/5357370), 2019-06-20
Supplement: f1 [file 5357370.f1.zip › section3.3/IVRawData_3-14-6h.csv]

03:44 04/04/2018
Test Lot:	JK-PERC
Recipe:	Recipe_YJX-LID
Cell Name:	3-14-6h
Test Order:	2
Test Condition:	Light
1	-0.29995233	9.10681630	-2.73161077		1.00000000	34.34000000	312.72807174	0.000000
2	-0.29013398	9.11655240	-2.64502163		2.00000000	17.17000000	156.53120471	0.061781
3	-0.27997100	9.10768220	-2.54988689		3.00000000	11.44666667	104.25260225	0.083212
4	-0.27018240	9.11606500	-2.46300032		4.00000000	8.58500000	78.26141803	0.104661
5	-0.26000381	9.10913090	-2.36840874		5.00000000	6.86800000	62.56151102	0.126126
6	-0.24988253	9.10468480	-2.27510167		6.00000000	5.72333333	52.10914601	0.147489
7	-0.24006937	9.12094020	-2.18965837		7.00000000	4.90571429	44.74472664	0.168864
8	-0.22990716	9.11149600	-2.09479817		8.00000000	4.29250000	39.11109658	0.190274
9	-0.22009996	9.10000040	-2.00290972		9.00000000	3.81555556	34.72155708	0.211776
10	-0.20995410	9.11637590	-1.91402050		10.00000000	3.43400000	31.30563484	0.233138
11	-0.20010671	9.09856220	-1.82068335		11.00000000	3.12181818	28.40405690	0.254503
12	-0.18996905	9.12678430	-1.73380654		12.00000000	2.86166667	26.11781441	0.275858
13	-0.18019682	9.10441780	-1.64058714		13.00000000	2.64153846	24.04966979	0.297327
14	-0.17003386	9.12021450	-1.55074528		14.00000000	2.45285714	22.37058328	0.318712
15	-0.16023113	9.10280230	-1.45855230		15.00000000	2.28933333	20.83934873	0.340088
16	-0.15008380	9.12418080	-1.36939173		16.00000000	2.14625000	19.58277304	0.361426
17	-0.13993572	9.11764050	-1.27588359		17.00000000	2.02000000	18.41763381	0.382896
18	-0.13011809	9.09982870	-1.18405233		18.00000000	1.90777778	17.36045098	0.404258
19	-0.11991865	9.11520390	-1.09308295		19.00000000	1.80736842	16.47453168	0.425652
20	-0.11012931	9.11265750	-1.00357068		20.00000000	1.71700000	15.64643293	0.447135
21	-0.09997752	9.11287120	-0.91108223		21.00000000	1.63523810	14.90171414	0.468504
22	-0.09016063	9.11351010	-0.82167982		22.00000000	1.56090909	14.22536077	0.489872
23	-0.07999916	9.11738010	-0.72938271		23.00000000	1.49304348	13.61264490	0.511250
24	-0.07018451	9.10255240	-0.63885814		24.00000000	1.43083333	13.02423539	0.532722
25	-0.06003718	9.11095520	-0.54699603		25.00000000	1.37360000	12.51480806	0.554146
26	-0.04987198	9.11083510	-0.45437536		26.00000000	1.32076923	12.03331067	0.575520
27	-0.04006701	9.11174110	-0.36508019		27.00000000	1.27185185	11.58878479	0.596888
28	-0.02989883	9.10462670	-0.27221771		28.00000000	1.22642857	11.16617432	0.618382
29	-0.02009758	9.10437110	-0.18297586		29.00000000	1.18413793	10.78083116	0.639753
30	-0.00993536	9.12501050	-0.09066030		30.00000000	1.14466667	10.44509535	0.661091
31	-0.00068934	9.10539250	-0.00627668		31.00000000	1.10774194	10.08642511	0.682604
32	0.00945184	9.11100010	0.08611568		32.00000000	1.07312500	9.77724198	0.704083
33	0.01928779	9.11064820	0.17572424		33.00000000	1.04060606	9.48059573	0.725453
34	0.02945418	9.12498190	0.26876889		34.00000000	1.01000000	9.21623172	0.746803
35	0.03924920	9.10389710	0.35732068		35.00000000	0.98114286	8.93222361	0.768177
36	0.04941634	9.11566830	0.45046294		36.00000000	0.95388889	8.69533471	0.789643
37	0.05921657	9.10301110	0.53904906		37.00000000	0.92810811	8.44857841	0.811020
38	0.06934352	9.11370850	0.63197658		38.00000000	0.90368421	8.23591447	0.832362
39	0.07948684	9.10220530	0.72350553		39.00000000	0.88051282	8.01460846	0.853737
40	0.08932056	9.10927960	0.81364591		40.00000000	0.85850000	7.82031654	0.875213
41	0.09946165	9.11458490	0.90655161		41.00000000	0.83756098	7.63402062	0.896578
42	0.10929239	9.10611530	0.99522910		42.00000000	0.81761905	7.44533332	0.917946
43	0.11943795	9.11827660	1.08906826		43.00000000	0.79860465	7.28189810	0.939323
44	0.12923147	9.10956190	1.17724208		44.00000000	0.78045455	7.10959899	0.960794
45	0.13938522	9.10850720	1.26959128		45.00000000	0.76311111	6.95080305	0.982185
46	0.14923158	9.10801790	1.35920390		46.00000000	0.74652174	6.79933336	1.003567
47	0.15937789	9.12729360	1.45468880		47.00000000	0.73063830	6.66875026	1.024926
48	0.16955470	9.10728360	1.54418274		48.00000000	0.71541667	6.51550248	1.046401
49	0.17934674	9.10087010	1.63221138		49.00000000	0.70081633	6.37803835	1.067786
50	0.18947890	9.09949020	1.72416139		50.00000000	0.68680000	6.24952987	1.089166
51	0.19925903	9.11298080	1.81584371		51.00000000	0.67333333	6.13607374	1.110659
52	0.20940013	9.11211300	1.90807765		52.00000000	0.66038462	6.01749924	1.132029
53	0.21925543	9.12106510	1.99984305		53.00000000	0.64792453	5.90976180	1.153383
54	0.22937493	9.10349180	2.08811279		54.00000000	0.63592593	5.78914645	1.174762
55	0.23917739	9.11291600	2.17960346		55.00000000	0.62436364	5.68977337	1.196251
56	0.24936463	9.11141200	2.27206388		56.00000000	0.61321429	5.58724800	1.217632
57	0.25949529	9.09788800	2.36085908		57.00000000	0.60245614	5.48107849	1.238975
58	0.26930818	9.10923960	2.45319274		58.00000000	0.59206897	5.39329807	1.260352
59	0.27946937	9.10767750	2.54531689		59.00000000	0.58203390	5.30097704	1.281836
60	0.28928521	9.10563660	2.63412600		60.00000000	0.57233333	5.21145935	1.303254
61	0.29945460	9.11108880	2.72835745		61.00000000	0.56295082	5.12909491	1.324615
62	0.30927044	9.10996720	2.81744356		62.00000000	0.55387097	5.04574635	1.346000
63	0.31942344	9.10586170	2.90862567		63.00000000	0.54507937	4.96341731	1.367479
64	0.32924378	9.10518740	2.99782632		64.00000000	0.53656250	4.88550211	1.388861
65	0.33939454	9.11359690	3.09310503		65.00000000	0.52830769	4.81478335	1.410207
66	0.34919104	9.10396100	3.17902161		66.00000000	0.52030303	4.73681850	1.431582
67	0.35935745	9.10719490	3.27273834		67.00000000	0.51253731	4.66777721	1.453066
68	0.36950448	9.11105730	3.36657649		68.00000000	0.50500000	4.60108394	1.474452
69	0.37933001	9.09883590	3.45146151		69.00000000	0.49768116	4.52831920	1.495790
70	0.38948449	9.11587810	3.55049313		70.00000000	0.49057143	4.47198934	1.517172
71	0.39930332	9.10012720	3.63371100		71.00000000	0.48366197	4.40138547	1.538652
72	0.40945262	9.10562130	3.72832050		72.00000000	0.47694444	4.34287549	1.560021
73	0.41923869	9.09328650	3.81225752		73.00000000	0.47041096	4.27758162	1.581410
74	0.42943338	9.10446170	3.90975976		74.00000000	0.46405405	4.22496236	1.602771
75	0.43922317	9.09554100	3.99497235		75.00000000	0.45786667	4.16454504	1.624237
76	0.44935459	9.09425450	4.08654500		76.00000000	0.45184211	4.10916710	1.645616
77	0.45953885	9.10167790	4.18257460		77.00000000	0.44597403	4.05911194	1.666994
78	0.46936661	9.08636760	4.26483756		78.00000000	0.44025641	4.00033158	1.688357
79	0.47953898	9.09177110	4.35985864		79.00000000	0.43468354	3.95204329	1.709838
80	0.48936376	9.07150460	4.43926560		80.00000000	0.42925000	3.89394335	1.731215
81	0.49947357	9.05492210	4.52269427		81.00000000	0.42395062	3.83883981	1.752599
82	0.50929910	9.05559830	4.61200806		82.00000000	0.41878049	3.79230787	1.774088
83	0.51942533	9.02761080	4.68916972		83.00000000	0.41373494	3.73503801	1.795461
84	0.52919650	8.99622250	4.76076946		84.00000000	0.40880952	3.67774144	1.816825
85	0.53936964	8.94944190	4.82705726		85.00000000	0.40400000	3.61557453	1.838195
86	0.54952413	8.89439010	4.88768198		86.00000000	0.39930233	3.55155065	1.859672
87	0.55935711	8.80410860	4.92464074		87.00000000	0.39471264	3.47509298	1.881056
88	0.56947583	8.67664430	4.94113921		88.00000000	0.39022727	3.38586324	1.902403
89	0.57924330	8.49789810	4.92235054		89.00000000	0.38584270	3.27885192	1.923770
90	0.58941418	8.29028700	4.88641271		90.00000000	0.38155556	3.16320506	1.945268
91	0.59918094	7.95380120	4.76576608		91.00000000	0.37736264	3.00146740	1.966639
92	0.60935104	7.49448010	4.56676924		92.00000000	0.37326087	2.79739616	1.988098
93	0.61911333	6.90471510	4.27480116		93.00000000	0.36924731	2.54954749	2.009499
94	0.62924546	6.11792520	3.84967666		94.00000000	0.36531915	2.23499523	2.031002
95	0.63935530	5.07609610	3.24542894		95.00000000	0.36147368	1.83487516	2.052427
96	0.64914435	3.77354410	2.44957483		96.00000000	0.35770833	1.34982817	2.073798
97	0.65923333	2.12340860	1.39982172		97.00000000	0.35402062	0.75173043	2.095177
98	0.66898370	0.16493538	0.11033908		98.00000000	0.35040816	0.05779470	2.116659
99	0.67906678	-2.25770500	-1.53313246		99.00000000	0.34686869	-0.78312717	2.138032
100	0.68874866	-5.03122810	-3.46525161		100.00000000	0.34340000	-1.72772373	2.159382
101	0.69901103	-8.38519570	-5.86134428		101.00000000	0.34000000	-2.85096654	2.180814
03:44 04/04/2018
Test Lot:	JK-PERC
Recipe:	Recipe_YJX-LID
Cell Name:	3-14-6h
Test Order:	3
Test Condition:	Light
1	-0.29989612	9.10053540	-2.72921526		1.00000000	34.34000000	312.51238564	0.000000
2	-0.29013965	9.11027240	-2.64325125		2.00000000	17.17000000	156.42337711	0.061789
3	-0.27999023	9.12450310	-2.55477172		3.00000000	11.44666667	104.44514548	0.083209
4	-0.27017197	9.10577300	-2.46012463		4.00000000	8.58500000	78.17306121	0.104700
5	-0.25998610	9.11798100	-2.37054832		5.00000000	6.86800000	62.62229351	0.126095
6	-0.24984634	9.09524540	-2.27241377		6.00000000	5.72333333	52.05512117	0.147445
7	-0.24001917	9.11756320	-2.18838995		7.00000000	4.90571429	44.72816004	0.168826
8	-0.22989653	9.11881540	-2.09638402		8.00000000	4.29250000	39.14251510	0.190346
9	-0.22005077	9.10439400	-2.00342891		9.00000000	3.81555556	34.73832111	0.211734
10	-0.20990059	9.11462780	-1.91316575		10.00000000	3.43400000	31.29963187	0.233129
11	-0.20010766	9.10241790	-1.82146355		11.00000000	3.12181818	28.41609370	0.254515
12	-0.18994781	9.12293910	-1.73288230		12.00000000	2.86166667	26.10681072	0.275993
13	-0.18017796	9.09109780	-1.63801546		13.00000000	2.64153846	24.01448450	0.297369
14	-0.17004117	9.12251660	-1.55120340		14.00000000	2.45285714	22.37623000	0.318719
15	-0.16021030	9.10946460	-1.45943006		15.00000000	2.28933333	20.85460096	0.340094
16	-0.15007724	9.10270210	-1.36610841		16.00000000	2.14625000	19.53667438	0.361561
17	-0.13990474	9.10912700	-1.27441004		17.00000000	2.02000000	18.40043654	0.382930
18	-0.13002548	9.11787890	-1.18555658		18.00000000	1.90777778	17.39488675	0.404290
19	-0.11989614	9.10571580	-1.09174018		19.00000000	1.80736842	16.45738319	0.425670
20	-0.11012182	9.11448290	-1.00370345		20.00000000	1.71700000	15.64956714	0.447145
21	-0.09994188	9.10738180	-0.91020886		21.00000000	1.63523810	14.89273767	0.468518
22	-0.09012662	9.10965820	-0.82102269		22.00000000	1.56090909	14.21934830	0.489902
23	-0.07998538	9.11080650	-0.72873132		23.00000000	1.49304348	13.60283023	0.511241
24	-0.07014258	9.10788540	-0.63885060		24.00000000	1.43083333	13.03186603	0.532703
25	-0.05997158	9.10127830	-0.54581799		25.00000000	1.37360000	12.50151587	0.554078
26	-0.04982661	9.10995010	-0.45391794		26.00000000	1.32076923	12.03214179	0.575474
27	-0.04004187	9.10802270	-0.36470224		27.00000000	1.27185185	11.58405554	0.596959
28	-0.02987235	9.11036210	-0.27214788		28.00000000	1.22642857	11.17320838	0.618341
29	-0.02008463	9.10558890	-0.18288236		29.00000000	1.18413793	10.78227320	0.639683
30	-0.00988608	9.10976980	-0.09005988		30.00000000	1.14466667	10.42764983	0.661062
31	-0.00062678	9.10738180	-0.00570832		31.00000000	1.10774194	10.08862874	0.682648
32	0.00950607	9.09835910	0.08648960		32.00000000	1.07312500	9.76367661	0.704035
33	0.01929723	9.10854150	0.17576961		33.00000000	1.04060606	9.47840349	0.725389
34	0.02945083	9.10584450	0.26817470		34.00000000	1.01000000	9.19690295	0.746760
35	0.03925986	9.11578460	0.35788438		35.00000000	0.98114286	8.94388695	0.768239
36	0.04939262	9.10414220	0.44967745		36.00000000	0.95388889	8.68434009	0.789664
37	0.05924407	9.10912420	0.53966156		37.00000000	0.92810811	8.45425203	0.811028
38	0.06941404	9.12013050	0.63306512		38.00000000	0.90368421	8.24171793	0.832402
39	0.07954606	9.10706810	0.72443142		39.00000000	0.88051282	8.01889022	0.853890
40	0.08935137	9.11826130	0.81472915		40.00000000	0.85850000	7.82802733	0.875271
41	0.09949604	9.09833620	0.90524846		41.00000000	0.83756098	7.62041134	0.896626
42	0.10930879	9.10911080	0.99570588		42.00000000	0.81761905	7.44778250	0.918008
43	0.11944602	9.11727810	1.08902258		43.00000000	0.79860465	7.28110070	0.939487
44	0.12928927	9.10229300	1.17682882		44.00000000	0.78045455	7.10392595	0.960877
45	0.13940492	9.11100670	1.27011916		45.00000000	0.76311111	6.95271045	0.982228
46	0.14926605	9.11853120	1.36108713		46.00000000	0.74652174	6.80718177	1.003599
47	0.15936904	9.11514190	1.45267141		47.00000000	0.73063830	6.65987176	1.025079
48	0.16955465	9.11146160	1.54489068		48.00000000	0.71541667	6.51849149	1.046451
49	0.17938972	9.10936260	1.63412601		49.00000000	0.70081633	6.38399003	1.067813
50	0.18952471	9.11537550	1.72758890		50.00000000	0.68680000	6.26043989	1.089191
51	0.19932333	9.11210920	1.81625595		51.00000000	0.67333333	6.13548686	1.110661
52	0.20944344	9.11277010	1.90860992		52.00000000	0.66038462	6.01793318	1.132033
53	0.21928297	9.10322090	1.99618132		53.00000000	0.64792453	5.89820011	1.153418
54	0.22943881	9.11168380	2.09057389		54.00000000	0.63592593	5.79435596	1.174769
55	0.23923890	9.10213950	2.17758584		55.00000000	0.62436364	5.68304492	1.196243
56	0.24941409	9.11434270	2.27324549		56.00000000	0.61321429	5.58904515	1.217620
57	0.25956249	9.10841270	2.36420228		57.00000000	0.60245614	5.48741916	1.239002
58	0.26938340	9.10532860	2.45282438		58.00000000	0.59206897	5.39098248	1.260481
59	0.27952734	9.11133000	2.54686584		59.00000000	0.58203390	5.30310292	1.281863
60	0.28933561	9.10405540	2.63412742		60.00000000	0.57233333	5.21055437	1.303207
61	0.29947880	9.10916900	2.72800300		61.00000000	0.56295082	5.12801416	1.324597
62	0.30931386	9.10249330	2.81552734		62.00000000	0.55387097	5.04160677	1.346079
63	0.31942803	9.11183070	2.91057413		63.00000000	0.54507937	4.96667089	1.367447
64	0.32930106	9.12085820	3.00350827		64.00000000	0.53656250	4.89391048	1.388810
65	0.33940703	9.10063550	3.08881967		65.00000000	0.52830769	4.80793574	1.410177
66	0.34920415	9.10943600	3.18105286		66.00000000	0.52030303	4.73966716	1.431653
67	0.35935849	9.10071750	3.27042010		67.00000000	0.51253731	4.66445730	1.453064
68	0.36952251	9.11589150	3.36852711		68.00000000	0.50500000	4.60352521	1.474420
69	0.37933081	9.09861950	3.45138670		69.00000000	0.49768116	4.52821150	1.495795
70	0.38951120	9.10867310	3.54793019		70.00000000	0.49057143	4.46845478	1.517275
71	0.39930013	9.10206410	3.63445538		71.00000000	0.48366197	4.40232227	1.538685
72	0.40947086	9.10557750	3.72846865		72.00000000	0.47694444	4.34285460	1.560054
73	0.41928136	9.09627630	3.81389910		73.00000000	0.47041096	4.27898806	1.581441
74	0.42942455	9.09806540	3.90693264		74.00000000	0.46405405	4.22199413	1.602916
75	0.43927822	9.10849950	4.00116545		75.00000000	0.45786667	4.17047830	1.624308
76	0.44943035	9.09055230	4.08557010		76.00000000	0.45184211	4.10749429	1.645653
77	0.45956907	9.10225770	4.18311611		77.00000000	0.44597403	4.05937051	1.667024
78	0.46942720	9.08729650	4.26582415		78.00000000	0.44025641	4.00074054	1.688508
79	0.47956890	9.07824230	4.35364267		79.00000000	0.43468354	3.94616254	1.709891
80	0.48935857	9.07128330	4.43911022		80.00000000	0.42925000	3.89384836	1.731247
81	0.49951664	9.05880830	4.52502548		81.00000000	0.42395062	3.84048737	1.752615
82	0.50933313	9.05357270	4.61128452		82.00000000	0.41878049	3.79145959	1.774099
83	0.51947033	9.03187370	4.69179041		83.00000000	0.41373494	3.73680172	1.795517
84	0.52922577	8.98775770	4.75655299		84.00000000	0.40880952	3.67428095	1.816902
85	0.53940988	8.96294590	4.83470157		85.00000000	0.40400000	3.62103014	1.838244
86	0.54952854	8.88596920	4.88309368		86.00000000	0.39930233	3.54818817	1.859714
87	0.55934572	8.78847690	4.91579694		87.00000000	0.39471264	3.46892295	1.881092
88	0.56948149	8.68769840	4.94748343		88.00000000	0.39022727	3.39017685	1.902475
89	0.57931507	8.51030830	4.93014985		89.00000000	0.38584270	3.28364030	1.923956
90	0.58944261	8.27045150	4.87495652		90.00000000	0.38155556	3.15563672	1.945345
91	0.59924942	7.97125150	4.77676784		91.00000000	0.37736264	3.00805249	1.966693
92	0.60936505	7.50064470	4.57063073		92.00000000	0.37326087	2.79969716	1.988174
93	0.61914879	6.90783450	4.27697737		93.00000000	0.36924731	2.55069932	2.009683
94	0.62927705	6.12327620	3.85323718		94.00000000	0.36531915	2.23695005	2.031068
95	0.63938898	5.06825020	3.24058333		95.00000000	0.36147368	1.83203907	2.052422
96	0.64914370	3.79170890	2.46136394		96.00000000	0.35770833	1.35632587	2.073798
97	0.65927720	2.12335800	1.39988152		97.00000000	0.35402062	0.75171251	2.095272
98	0.66898203	0.16968365	0.11351531		98.00000000	0.35040816	0.05945854	2.116651
99	0.67907685	-2.27784590	-1.54683242		99.00000000	0.34686869	-0.79011342	2.137996
100	0.68877941	-5.04818770	-3.47708775		100.00000000	0.34340000	-1.73354766	2.159370
101	0.69905508	-8.42637250	-5.89049850		101.00000000	0.34000000	-2.86496665	2.180902
03:44 04/04/2018
Test Lot:	JK-PERC
Recipe:	Recipe_YJX-LID
Cell Name:	3-14-6h
Test Order:	4
Test Condition:	Light
1	-0.29995081	9.11702920	-2.73466029		1.00000000	34.34000000	313.07878273	0.000000
2	-0.29014298	9.11224270	-2.64385325		2.00000000	17.17000000	156.45720716	0.061795
3	-0.27996159	9.11100960	-2.55073273		3.00000000	11.44666667	104.29068989	0.083226
4	-0.27014038	9.10053060	-2.45842079		4.00000000	8.58500000	78.12805520	0.104718
5	-0.25997758	9.10685060	-2.36757698		5.00000000	6.86800000	62.54584992	0.126096
6	-0.24984154	9.11607650	-2.27757459		6.00000000	5.72333333	52.17434450	0.147513
7	-0.24000323	9.10937600	-2.18627966		7.00000000	4.90571429	44.68799598	0.168916
8	-0.22984265	9.11514000	-2.09504793		8.00000000	4.29250000	39.12673845	0.190406
9	-0.22004154	9.10426710	-2.00331695		9.00000000	3.81555556	34.73783691	0.211780
10	-0.20989065	9.12434580	-1.91511487		10.00000000	3.43400000	31.33300348	0.233139
11	-0.20007391	9.11025050	-1.82272344		11.00000000	3.12181818	28.44054565	0.254509
12	-0.18991855	9.11292740	-1.73071396		12.00000000	2.86166667	26.07816058	0.275980
13	-0.18012190	9.10852150	-1.64064420		13.00000000	2.64153846	24.06050987	0.297389
14	-0.16998515	9.10709100	-1.54807023		14.00000000	2.45285714	22.33839321	0.318744
15	-0.16015799	9.11379530	-1.45964714		15.00000000	2.28933333	20.86451537	0.340123
16	-0.15003015	9.10577110	-1.36614020		16.00000000	2.14625000	19.54326122	0.361623
17	-0.13986959	9.11486630	-1.27489261		17.00000000	2.02000000	18.41202993	0.383045
18	-0.13007070	9.10927580	-1.18484988		18.00000000	1.90777778	17.37847394	0.404459
19	-0.11992203	9.11295220	-1.09284373		19.00000000	1.80736842	16.47046203	0.425843
20	-0.11008967	9.10491850	-1.00235747		20.00000000	1.71700000	15.63314506	0.447320
21	-0.09992984	9.11215970	-0.91057665		21.00000000	1.63523810	14.90055067	0.468706
22	-0.09013321	9.10848140	-0.82097662		22.00000000	1.56090909	14.21751142	0.490053
23	-0.07996593	9.11536030	-0.72891824		23.00000000	1.49304348	13.60962925	0.511434
24	-0.07016259	9.09506130	-0.63813303		24.00000000	1.43083333	13.01351688	0.532907
25	-0.06001764	9.10742000	-0.54660584		25.00000000	1.37360000	12.50995211	0.554288
26	-0.04986450	9.10381980	-0.45395743		26.00000000	1.32076923	12.02404507	0.575668
27	-0.04006042	9.11197280	-0.36502946		27.00000000	1.27185185	11.58907948	0.597025
28	-0.02987900	9.09992790	-0.27189678		28.00000000	1.22642857	11.16041157	0.618508
29	-0.02006227	9.11351490	-0.18283780		29.00000000	1.18413793	10.79165868	0.639885
30	-0.00994337	9.10975460	-0.09058166		30.00000000	1.14466667	10.42763243	0.661293
31	-0.00066548	9.10942460	-0.00606212		31.00000000	1.10774194	10.09089164	0.682813
32	0.00948224	9.11327930	0.08641432		32.00000000	1.07312500	9.77968785	0.704271
33	0.01930391	9.11045070	0.17586727		33.00000000	1.04060606	9.48039021	0.725640
34	0.02943740	9.11312580	0.26826675		34.00000000	1.01000000	9.20425706	0.747018
35	0.03927246	9.10771180	0.35768226		35.00000000	0.98114286	8.93596638	0.768500
36	0.04942308	9.11121460	0.45030425		36.00000000	0.95388889	8.69108637	0.789896
37	0.05923060	9.10809610	0.53947796		37.00000000	0.92810811	8.45329784	0.811234
38	0.06939387	9.10935400	0.63213329		38.00000000	0.90368421	8.23197938	0.832614
39	0.07954522	9.10762020	0.72446767		39.00000000	0.88051282	8.01937635	0.854098
40	0.08936242	9.09647850	0.81288333		40.00000000	0.85850000	7.80932679	0.875474
41	0.09951676	9.11061760	0.90665912		41.00000000	0.83756098	7.63069777	0.896847
42	0.10932800	9.11243630	0.99624444		42.00000000	0.81761905	7.45050149	0.918227
43	0.11949722	9.09136200	1.08639249		43.00000000	0.79860465	7.26040398	0.939712
44	0.12929879	9.09883690	1.17646860		44.00000000	0.78045455	7.10122862	0.961106
45	0.13945164	9.11327460	1.27086109		45.00000000	0.76311111	6.95444111	0.982460
46	0.14928000	9.11075120	1.36005294		46.00000000	0.74652174	6.80137383	1.003831
47	0.15944102	9.10195730	1.45122536		47.00000000	0.73063830	6.65023859	1.025321
48	0.16954848	9.11213780	1.54494911		48.00000000	0.71541667	6.51897525	1.046711
49	0.17940810	9.11066720	1.63452749		49.00000000	0.70081633	6.38490432	1.068079
50	0.18952447	9.10776710	1.72614473		50.00000000	0.68680000	6.25521444	1.089459
51	0.19932976	9.10930920	1.81575642		51.00000000	0.67333333	6.13360153	1.110934
52	0.20943797	9.10467150	1.90686392		52.00000000	0.66038462	6.01258499	1.132334
53	0.21926409	9.10297200	1.99595487		53.00000000	0.64792453	5.89803884	1.153678
54	0.22938865	9.11687950	2.09130868		54.00000000	0.63592593	5.79766004	1.175056
55	0.23920958	9.10282900	2.17748390		55.00000000	0.62436364	5.68347542	1.196544
56	0.24938251	9.10117340	2.26967347		56.00000000	0.61321429	5.58096955	1.217923
57	0.25950187	9.10596660	2.36301536		57.00000000	0.60245614	5.48594549	1.239295
58	0.26936373	9.09540840	2.44997313		58.00000000	0.59206897	5.38510904	1.260648
59	0.27948979	9.11356160	2.54714742		59.00000000	0.58203390	5.30440179	1.282115
60	0.28933078	9.09706780	2.63206172		60.00000000	0.57233333	5.20655514	1.303514
61	0.29943526	9.12222480	2.73151575		61.00000000	0.56295082	5.13536393	1.324908
62	0.30927256	9.08272840	2.80903866		62.00000000	0.55387097	5.03065957	1.346251
63	0.31941870	9.10673240	2.90886062		63.00000000	0.54507937	4.96389191	1.367726
64	0.32926419	9.11254020	3.00043317		64.00000000	0.53656250	4.88944735	1.389107
65	0.33937535	9.10476780	3.08993376		65.00000000	0.52830769	4.81011887	1.410498
66	0.34919849	9.11013030	3.18124374		66.00000000	0.52030303	4.74002840	1.431995
67	0.35932305	9.09374330	3.26759158		67.00000000	0.51253731	4.66088276	1.453369
68	0.36953172	9.10884000	3.36600531		68.00000000	0.50500000	4.59996420	1.474712
69	0.37933478	9.09835240	3.45132151		69.00000000	0.49768116	4.52807857	1.496097
70	0.38951218	9.10564900	3.54676119		70.00000000	0.49057143	4.46697124	1.517586
71	0.39931524	9.10207940	3.63459902		71.00000000	0.48366197	4.40232967	1.538975
72	0.40947628	9.10543540	3.72845982		72.00000000	0.47694444	4.34278683	1.560337
73	0.41930464	9.09674550	3.81430760		73.00000000	0.47041096	4.27920877	1.581711
74	0.42944783	9.10513500	3.91018047		74.00000000	0.46405405	4.22527481	1.603194
75	0.43923375	9.08698270	3.99130949		75.00000000	0.45786667	4.16062648	1.624577
76	0.44939479	9.10241990	4.09058008		76.00000000	0.45184211	4.11285657	1.645930
77	0.45954242	9.09002300	4.17725117		77.00000000	0.44597403	4.05391415	1.667314
78	0.46942288	9.08608440	4.26521591		78.00000000	0.44025641	4.00020690	1.688794
79	0.47954226	9.08215240	4.35527589		79.00000000	0.43468354	3.94786220	1.710168
80	0.48938102	9.08472920	4.44589404		80.00000000	0.42925000	3.89962001	1.731525
81	0.49950409	9.04839420	4.51970991		81.00000000	0.42395062	3.83607231	1.752896
82	0.50932872	9.06188870	4.61548017		82.00000000	0.41878049	3.79494217	1.774375
83	0.51947266	9.01452350	4.68279850		83.00000000	0.41373494	3.72962334	1.795777
84	0.52924889	8.99939160	4.76291801		84.00000000	0.40880952	3.67903699	1.817136
85	0.53934151	8.95268540	4.82855486		85.00000000	0.40400000	3.61688490	1.838510
86	0.54952186	8.88566210	4.88286556		86.00000000	0.39930233	3.54806554	1.859998
87	0.55932492	8.81571480	4.93084898		87.00000000	0.39471264	3.47967409	1.881378
88	0.56944203	8.67936990	4.94239801		88.00000000	0.39022727	3.38692685	1.902760
89	0.57926667	8.51822570	4.93432424		89.00000000	0.38584270	3.28669517	1.924166
90	0.58938384	8.25944810	4.86798524		90.00000000	0.38155556	3.15143831	1.945646
91	0.59922779	7.96528150	4.77301803		91.00000000	0.37736264	3.00579963	1.967033
92	0.60932857	7.49908070	4.56940412		92.00000000	0.37326087	2.79911338	1.988526
93	0.61913532	6.90378950	4.27437992		93.00000000	0.36924731	2.54920571	2.009906
94	0.62926066	6.11092420	3.84536420		94.00000000	0.36531915	2.23243763	2.031403
95	0.63935322	5.06803750	3.24026609		95.00000000	0.36147368	1.83196219	2.052788
96	0.64915252	3.78325200	2.45590757		96.00000000	0.35770833	1.35330077	2.074168
97	0.65925401	2.12107420	1.39832667		97.00000000	0.35402062	0.75090400	2.095668
98	0.66896260	0.16181058	0.10824523		98.00000000	0.35040816	0.05669975	2.117047
99	0.67908639	-2.26993250	-1.54148027		99.00000000	0.34686869	-0.78736851	2.138392
100	0.68878752	-5.05048990	-3.47871441		100.00000000	0.34340000	-1.73433823	2.159813
101	0.69906759	-8.43899440	-5.89942748		101.00000000	0.34000000	-2.86925810	2.181322
