# Supplementary material for: Study on the Electrical Injection Regeneration of Industrialized B-Doped Czochralski Silicon PERC Solar Cells
Source: Hindawi journal article supplement (doi:10.1155/2019/5357370), 2019-06-20
Supplement: f1 [file 5357370.f1.zip › section3.3/IVRawData_3-14-7h.csv]

04:46 04/04/2018
Test Lot:	JK-PERC
Recipe:	Recipe_YJX-LID
Cell Name:	3-14-7h
Test Order:	2
Test Condition:	Light
1	-0.29987136	9.09811690	-2.72826469		1.00000000	34.34000000	312.42933435	0.000000
2	-0.29008570	9.10537150	-2.64133807		2.00000000	17.17000000	156.33922866	0.061792
3	-0.27995023	9.09339900	-2.54569914		3.00000000	11.44666667	104.08910722	0.083214
4	-0.27010283	9.09654810	-2.45700339		4.00000000	8.58500000	78.09386544	0.104707
5	-0.25995174	9.09271810	-2.36366789		5.00000000	6.86800000	62.44878791	0.126097
6	-0.24978949	9.10120110	-2.27338438		6.00000000	5.72333333	52.08920763	0.147503
7	-0.24002616	9.09294800	-2.18254539		7.00000000	4.90571429	44.60740490	0.168890
8	-0.22984308	9.10106560	-2.09181695		8.00000000	4.29250000	39.06632409	0.190383
9	-0.22003882	9.09345910	-2.00091401		9.00000000	3.81555556	34.69659839	0.211757
10	-0.20989220	9.09638980	-1.90926127		10.00000000	3.43400000	31.23700257	0.233111
11	-0.20003659	9.08220770	-1.81677386		11.00000000	3.12181818	28.35300113	0.254486
12	-0.18991676	9.10678010	-1.72953017		12.00000000	2.86166667	26.06056905	0.275969
13	-0.18009688	9.08988090	-1.63705919		13.00000000	2.64153846	24.01127001	0.297352
14	-0.16991751	9.09924130	-1.54612042		14.00000000	2.45285714	22.31913902	0.318736
15	-0.16013484	9.09481910	-1.45639740		15.00000000	2.28933333	20.82107253	0.340080
16	-0.14999045	9.10317710	-1.36538963		16.00000000	2.14625000	19.53769385	0.361553
17	-0.13980439	9.08889960	-1.27066806		17.00000000	2.02000000	18.35957719	0.382938
18	-0.13000980	9.09746070	-1.18275905		18.00000000	1.90777778	17.35593336	0.404330
19	-0.11985649	9.08597370	-1.08901292		19.00000000	1.80736842	16.42170194	0.425849
20	-0.11002916	9.10729030	-1.00206750		20.00000000	1.71700000	15.63721745	0.447230
21	-0.09989817	9.08064370	-0.90713972		21.00000000	1.63523810	14.84901451	0.468575
22	-0.09008424	9.10116390	-0.81987143		22.00000000	1.56090909	14.20608947	0.489953
23	-0.07993986	9.08992770	-0.72664752		23.00000000	1.49304348	13.57165727	0.511432
24	-0.07007382	9.09066390	-0.63701755		24.00000000	1.43083333	13.00722493	0.532801
25	-0.05996293	9.09040830	-0.54508750		25.00000000	1.37360000	12.48658484	0.554157
26	-0.04981929	9.07999610	-0.45235893		26.00000000	1.32076923	11.99257946	0.575531
27	-0.04000387	9.10472390	-0.36422415		27.00000000	1.27185185	11.57985995	0.597006
28	-0.02983939	9.08411500	-0.27106440		28.00000000	1.22642857	11.14101818	0.618394
29	-0.02003066	9.08832550	-0.18204519		29.00000000	1.18413793	10.76183095	0.639747
30	-0.00989595	9.09016610	-0.08995586		30.00000000	1.14466667	10.40521013	0.661127
31	-0.00066032	9.09951500	-0.00600858		31.00000000	1.10774194	10.07991436	0.682727
32	0.00951214	9.08104900	0.08638022		32.00000000	1.07312500	9.74510071	0.704106
33	0.01931910	9.10827830	0.17596369		33.00000000	1.04060606	9.47812960	0.725464
34	0.02945501	9.08807850	0.26768941		34.00000000	1.01000000	9.17895929	0.746845
35	0.03930364	9.08192350	0.35695263		35.00000000	0.98114286	8.91066437	0.768320
36	0.04943955	9.09387300	0.44959695		36.00000000	0.95388889	8.67454441	0.789712
37	0.05925171	9.09844590	0.53909849		37.00000000	0.92810811	8.44434141	0.811061
38	0.06937497	9.10363100	0.63156414		38.00000000	0.90368421	8.22680759	0.832430
39	0.07953990	9.07733250	0.72201015		39.00000000	0.88051282	7.99270764	0.853912
40	0.08935728	9.09911820	0.81307244		40.00000000	0.85850000	7.81159297	0.875304
41	0.09951254	9.09770300	0.90533553		41.00000000	0.83756098	7.61988100	0.896737
42	0.10933735	9.09467220	0.99438736		42.00000000	0.81761905	7.43597722	0.918102
43	0.11948964	9.09114270	1.08629737		43.00000000	0.79860465	7.26022884	0.939581
44	0.12930329	9.09827520	1.17643692		44.00000000	0.78045455	7.10079024	0.960963
45	0.13945408	9.09134770	1.26782553		45.00000000	0.76311111	6.93770844	0.982344
46	0.14929900	9.08962250	1.35707155		46.00000000	0.74652174	6.78560080	1.003696
47	0.15944086	9.09628960	1.45032024		47.00000000	0.73063830	6.64609755	1.025170
48	0.16958049	9.09626960	1.54254986		48.00000000	0.71541667	6.50762288	1.046539
49	0.17942764	9.10326390	1.63337716		49.00000000	0.70081633	6.37971597	1.067915
50	0.18954048	9.08385280	1.72175782		50.00000000	0.68680000	6.23879010	1.089393
51	0.19934966	9.08117290	1.81032873		51.00000000	0.67333333	6.11465642	1.110766
52	0.20944464	9.09821890	1.90557318		52.00000000	0.66038462	6.00832379	1.132119
53	0.21928360	9.08611580	1.99243618		53.00000000	0.64792453	5.88711729	1.153499
54	0.22941801	9.10200880	2.08816475		54.00000000	0.63592593	5.78820337	1.174980
55	0.23923241	9.08795640	2.17413371		55.00000000	0.62436364	5.67418951	1.196356
56	0.24940404	9.09560200	2.26847989		56.00000000	0.61321429	5.57755308	1.217711
57	0.25955483	9.09885980	2.36165301		57.00000000	0.60245614	5.48166396	1.239076
58	0.26939455	9.09251790	2.44947477		58.00000000	0.59206897	5.38339767	1.260547
59	0.27949846	9.09257790	2.54136152		59.00000000	0.58203390	5.29218856	1.281928
60	0.28933814	9.08849430	2.62964804		60.00000000	0.57233333	5.20164824	1.303269
61	0.29950458	9.09809490	2.72492109		61.00000000	0.56295082	5.12177998	1.324644
62	0.30931821	9.09075070	2.81193473		62.00000000	0.55387097	5.03510289	1.346116
63	0.31945786	9.10775280	2.90954322		63.00000000	0.54507937	4.96444811	1.367495
64	0.32924917	9.08881280	2.99248407		64.00000000	0.53656250	4.87671612	1.388862
65	0.33940890	9.08974740	3.08514117		65.00000000	0.52830769	4.80218347	1.410233
66	0.34922776	9.10385800	3.17931994		66.00000000	0.52030303	4.73676490	1.431710
67	0.35939047	9.07561210	3.26168850		67.00000000	0.51253731	4.65158984	1.453100
68	0.36951298	9.10276600	3.36359019		68.00000000	0.50500000	4.59689683	1.474452
69	0.37936014	9.08198360	3.44534257		69.00000000	0.49768116	4.51993213	1.495828
70	0.38950497	9.08296490	3.53785997		70.00000000	0.49057143	4.45584307	1.517309
71	0.39932829	9.09026620	3.63000046		71.00000000	0.48366197	4.39661607	1.538684
72	0.40949398	9.08601380	3.72066795		72.00000000	0.47694444	4.33352380	1.560057
73	0.41928604	9.07972050	3.80700005		73.00000000	0.47041096	4.27120003	1.581422
74	0.42947927	9.08802990	3.90312045		74.00000000	0.46405405	4.21733712	1.602902
75	0.43927133	9.08713250	3.99171678		75.00000000	0.45786667	4.16069507	1.624290
76	0.44939980	9.09088040	4.08543983		76.00000000	0.45184211	4.10764254	1.645676
77	0.45956475	9.08186050	4.17370295		77.00000000	0.44597403	4.05027389	1.667013
78	0.46942157	9.08019830	4.26244094		78.00000000	0.44025641	3.99761551	1.688484
79	0.47956938	9.07444380	4.35182539		79.00000000	0.43468354	3.94451139	1.709856
80	0.48939121	9.05837730	4.43309023		80.00000000	0.42925000	3.88830846	1.731239
81	0.49952191	9.05362610	4.52248460		81.00000000	0.42395062	3.83829037	1.752735
82	0.50933480	9.02526860	4.59688338		82.00000000	0.41878049	3.77960639	1.774120
83	0.51950347	9.02772140	4.68993259		83.00000000	0.41373494	3.73508377	1.795471
84	0.52927846	8.97224330	4.74881512		84.00000000	0.40880952	3.66793851	1.816853
85	0.53943145	8.94216160	4.82368320		85.00000000	0.40400000	3.61263329	1.838337
86	0.54952866	8.86517430	4.87166735		86.00000000	0.39930233	3.53988471	1.859725
87	0.55938774	8.78360270	4.91343966		87.00000000	0.39471264	3.46699904	1.881086
88	0.56949610	8.65584850	4.92947196		88.00000000	0.39022727	3.37774815	1.902464
89	0.57932538	8.49105260	4.91908227		89.00000000	0.38584270	3.27621063	1.923950
90	0.58946276	8.25427340	4.86558678		90.00000000	0.38155556	3.14946387	1.945335
91	0.59926826	7.91451220	4.74291595		91.00000000	0.37736264	2.98664120	1.966677
92	0.60937214	7.49592160	4.56780579		92.00000000	0.37326087	2.79793421	1.988155
93	0.61913592	6.89075760	4.26631555		93.00000000	0.36924731	2.54439372	2.009668
94	0.62926960	6.08908800	3.83167797		94.00000000	0.36531915	2.22446045	2.031051
95	0.63940775	5.03343730	3.21841882		95.00000000	0.36147368	1.81945513	2.052410
96	0.64916635	3.75444630	2.43726020		96.00000000	0.35770833	1.34299673	2.073791
97	0.65926725	2.09507990	1.38121756		97.00000000	0.35402062	0.74170148	2.095284
98	0.66899532	0.14909841	0.09974614		98.00000000	0.35040816	0.05224530	2.116676
99	0.67909032	-2.27706070	-1.54632988		99.00000000	0.34686869	-0.78984105	2.138084
100	0.68882060	-5.03037450	-3.46502558		100.00000000	0.34340000	-1.72743060	2.159482
101	0.69903910	-8.37334060	-5.85329248		101.00000000	0.34000000	-2.84693580	2.180977
04:47 04/04/2018
Test Lot:	JK-PERC
Recipe:	Recipe_YJX-LID
Cell Name:	3-14-7h
Test Order:	3
Test Condition:	Light
1	-0.29994130	9.08641430	-2.72539092		1.00000000	34.34000000	312.02746706	0.000000
2	-0.29005668	9.10482410	-2.64091505		2.00000000	17.17000000	156.32982980	0.021594
3	-0.27996066	9.08683870	-2.54395736		3.00000000	11.44666667	104.01401365	0.042992
4	-0.27016088	9.09457020	-2.45699709		4.00000000	8.58500000	78.07688517	0.064419
5	-0.25998968	9.09797480	-2.36537956		5.00000000	6.86800000	62.48489093	0.085816
6	-0.24982893	9.10170170	-2.27386840		6.00000000	5.72333333	52.09207273	0.107315
7	-0.24001947	9.10347750	-2.18501184		7.00000000	4.90571429	44.65905962	0.128697
8	-0.22987433	9.09689710	-2.09114313		8.00000000	4.29250000	39.04843080	0.150047
9	-0.22002022	9.10271260	-2.00278083		9.00000000	3.81555556	34.73190563	0.171425
10	-0.20990634	9.09120560	-1.90830169		10.00000000	3.43400000	31.21920003	0.192914
11	-0.20006263	9.09074400	-1.81871815		11.00000000	3.12181818	28.37964991	0.214299
12	-0.18991156	9.10793500	-1.72970214		12.00000000	2.86166667	26.06387399	0.235659
13	-0.18010284	9.08729740	-1.63664807		13.00000000	2.64153846	24.00444559	0.257033
14	-0.16999492	9.09375950	-1.54589292		14.00000000	2.45285714	22.30569295	0.278522
15	-0.16013037	9.09520440	-1.45641845		15.00000000	2.28933333	20.82195461	0.299919
16	-0.15006042	9.09076400	-1.36416386		16.00000000	2.14625000	19.51105224	0.321287
17	-0.13984533	9.09018330	-1.27121968		17.00000000	2.02000000	18.36217027	0.342649
18	-0.13003214	9.09696010	-1.18289719		18.00000000	1.90777778	17.35497832	0.364119
19	-0.11986467	9.09893130	-1.09064040		19.00000000	1.80736842	16.44512110	0.385493
20	-0.11004479	9.08879280	-1.00017430		20.00000000	1.71700000	15.60545724	0.406881
21	-0.09990338	9.09479050	-0.90860033		21.00000000	1.63523810	14.87214789	0.428248
22	-0.09011401	9.09790330	-0.81984857		22.00000000	1.56090909	14.20099997	0.449723
23	-0.07995548	9.09060860	-0.72684398		23.00000000	1.49304348	13.57267388	0.471095
24	-0.07009839	9.10511110	-0.63825358		24.00000000	1.43083333	13.02789647	0.492485
25	-0.05997260	9.09205530	-0.54527422		25.00000000	1.37360000	12.48884716	0.513954
26	-0.04981110	9.09008310	-0.45278703		26.00000000	1.32076923	12.00590206	0.535340
27	-0.04001727	9.08171840	-0.36342554		27.00000000	1.27185185	11.55060037	0.556704
28	-0.02985874	9.12377550	-0.27242440		28.00000000	1.22642857	11.18965895	0.578079
29	-0.02002322	9.08895490	-0.18199015		29.00000000	1.18413793	10.76257625	0.599572
30	-0.00993912	9.09559150	-0.09040218		30.00000000	1.14466667	10.41142040	0.620952
31	-0.00064022	9.09281830	-0.00582144		31.00000000	1.10774194	10.07249614	0.642413
32	0.00944739	9.09779830	0.08595047		32.00000000	1.07312500	9.76307480	0.663804
33	0.01926253	9.09675500	0.17522653		33.00000000	1.04060606	9.46613838	0.685293
34	0.02944459	9.09352400	0.26775505		34.00000000	1.01000000	9.18445924	0.706664
35	0.03925749	9.09877110	0.35719494		35.00000000	0.98114286	8.92719427	0.728019
36	0.04942094	9.09854220	0.44965853		36.00000000	0.95388889	8.67899831	0.749398
37	0.05920408	9.08817670	0.53805713		37.00000000	0.92810811	8.43481048	0.770877
38	0.06939878	9.10546970	0.63190852		38.00000000	0.90368421	8.22846920	0.792274
39	0.07954288	9.07969760	0.72222532		39.00000000	0.88051282	7.99479014	0.813632
40	0.08936695	9.10386750	0.81358487		40.00000000	0.85850000	7.81567025	0.835013
41	0.09949691	9.09813690	0.90523649		41.00000000	0.83756098	7.62024442	0.856498
42	0.10928898	9.08477210	0.99286548		42.00000000	0.81761905	7.42788271	0.877868
43	0.11947103	9.09875580	1.08703773		43.00000000	0.79860465	7.26630870	0.899228
44	0.12931296	9.10624410	1.17755538		44.00000000	0.78045455	7.10700960	0.920604
45	0.13942803	9.08496570	1.26669887		45.00000000	0.76311111	6.93283827	0.942081
46	0.14924094	9.09829520	1.35783813		46.00000000	0.74652174	6.79207516	0.963470
47	0.15942821	9.10070710	1.45090944		47.00000000	0.73063830	6.64932514	0.984829
48	0.16959612	9.08164980	1.54021257		48.00000000	0.71541667	6.49716363	1.006194
49	0.17937851	9.09910960	1.63218472		49.00000000	0.70081633	6.37680456	1.027667
50	0.18955387	9.08803840	1.72267285		50.00000000	0.68680000	6.24166477	1.049051
51	0.19931988	9.10059360	1.81392922		51.00000000	0.67333333	6.12773302	1.070437
52	0.20946622	9.09362410	1.90480707		52.00000000	0.66038462	6.00528945	1.091783
53	0.21930964	9.09058000	1.99365183		53.00000000	0.64792453	5.89000976	1.113262
54	0.22945672	9.08502770	2.08462066		54.00000000	0.63592593	5.77740465	1.134695
55	0.23928897	9.09050180	2.17525681		55.00000000	0.62436364	5.67577876	1.156083
56	0.24938618	9.09433170	2.26800064		56.00000000	0.61321429	5.57677412	1.177574
57	0.25953624	9.09696390	2.36099181		57.00000000	0.60245614	5.48052176	1.198968
58	0.26940718	9.08829880	2.44845295		58.00000000	0.59206897	5.38089967	1.220308
59	0.27951333	9.08992770	2.54075596		59.00000000	0.58203390	5.29064605	1.241679
60	0.28934634	9.08702850	2.62929844		60.00000000	0.57233333	5.20080931	1.263163
61	0.29949117	9.09784510	2.72472427		61.00000000	0.56295082	5.12163936	1.284543
62	0.30929217	9.08092880	2.80866017		62.00000000	0.55387097	5.02966282	1.305904
63	0.31946084	9.08928870	2.90367180		63.00000000	0.54507937	4.95438371	1.327303
64	0.32926109	9.08886810	2.99261062		64.00000000	0.53656250	4.87674579	1.348784
65	0.33943421	9.08790490	3.08474582		65.00000000	0.52830769	4.80121007	1.370159
66	0.34925455	9.09268280	3.17566084		66.00000000	0.52030303	4.73095041	1.391517
67	0.35937560	9.08374790	3.26447735		67.00000000	0.51253731	4.65575974	1.412886
68	0.36955616	9.09435180	3.36087373		68.00000000	0.50500000	4.59264766	1.434362
69	0.37937129	9.09166340	3.44911607		69.00000000	0.49768116	4.52474958	1.455742
70	0.38950422	9.08335400	3.53800471		70.00000000	0.49057143	4.45603395	1.477079
71	0.39932680	9.09926510	3.63358041		71.00000000	0.48366197	4.40096850	1.498452
72	0.40947166	9.07715890	3.71683932		72.00000000	0.47694444	4.32930051	1.519935
73	0.41930389	9.09898660	3.81524048		73.00000000	0.47041096	4.28026301	1.541329
74	0.42946661	9.08788680	3.90294394		74.00000000	0.46405405	4.21727071	1.562694
75	0.43925571	9.09183500	3.99364044		75.00000000	0.45786667	4.16284819	1.584064
76	0.44945189	9.07660290	4.07949633		76.00000000	0.45184211	4.10119136	1.605551
77	0.45957515	9.07412340	4.17024162		77.00000000	0.44597403	4.04682334	1.626930
78	0.46941262	9.08628750	4.26521802		78.00000000	0.44025641	4.00029632	1.648301
79	0.47958350	9.05547710	4.34285740		79.00000000	0.43468354	3.93626688	1.669669
80	0.48939270	9.06305690	4.43539389		80.00000000	0.42925000	3.89031717	1.691133
81	0.49953827	9.03349300	4.51257547		81.00000000	0.42395062	3.82975493	1.712510
82	0.50936854	9.03762720	4.60348297		82.00000000	0.41878049	3.78478193	1.733929
83	0.51949871	8.99060060	4.67060541		83.00000000	0.41373494	3.71972560	1.795610
84	0.52928948	8.98912720	4.75785046		84.00000000	0.40880952	3.67484081	1.817028
85	0.53944123	8.92836090	4.81632599		85.00000000	0.40400000	3.60705780	1.838375
86	0.54959667	8.85891910	4.86883244		86.00000000	0.39930233	3.53738700	1.859852
87	0.55941349	8.80299950	4.92451667		87.00000000	0.39471264	3.47465520	1.881236
88	0.56954217	8.64328290	4.92271410		88.00000000	0.39022727	3.37284471	1.902610
89	0.57933593	8.49653240	4.92234650		89.00000000	0.38584270	3.27832497	1.924096
90	0.58949512	8.24521730	4.86051536		90.00000000	0.38155556	3.14600847	1.945477
91	0.59929556	7.93812080	4.75728055		91.00000000	0.37736264	2.99555020	1.966816
92	0.60939145	7.46249910	4.54758315		92.00000000	0.37326087	2.78545890	1.988303
93	0.61920458	6.88760140	4.26483433		93.00000000	0.36924731	2.54322830	2.009803
94	0.62932801	6.08342410	3.82846918		94.00000000	0.36531915	2.22239131	2.031177
95	0.63937634	5.02980470	3.21593812		95.00000000	0.36147368	1.81814204	2.052544
96	0.64920431	3.74863720	2.43363143		96.00000000	0.35770833	1.34091877	2.073973
97	0.65927565	2.09820030	1.38329237		97.00000000	0.35402062	0.74280617	2.095545
98	0.66900617	0.12315568	0.08239191		98.00000000	0.35040816	0.04315476	2.116925
99	0.67910427	-2.29034520	-1.55538321		99.00000000	0.34686869	-0.79444903	2.138279
100	0.68883401	-5.06548450	-3.48927800		100.00000000	0.34340000	-1.73948738	2.159668
101	0.69908476	-8.41392990	-5.88205016		101.00000000	0.34000000	-2.86073617	2.181151
04:47 04/04/2018
Test Lot:	JK-PERC
Recipe:	Recipe_YJX-LID
Cell Name:	3-14-7h
Test Order:	4
Test Condition:	Light
1	-0.29992491	9.09232520	-2.72701482		1.00000000	34.34000000	312.23044737	0.000000
2	-0.29004464	9.10520740	-2.64091660		2.00000000	17.17000000	156.33641106	0.061795
3	-0.27994627	9.08544830	-2.54343736		3.00000000	11.44666667	103.99809821	0.083250
4	-0.27010840	9.09391780	-2.45634359		4.00000000	8.58500000	78.07128431	0.104772
5	-0.25996462	9.09518430	-2.36442613		5.00000000	6.86800000	62.46572577	0.126158
6	-0.24980448	9.09002210	-2.27072824		6.00000000	5.72333333	52.02522649	0.147510
7	-0.23998894	9.09841820	-2.18351974		7.00000000	4.90571429	44.63424014	0.168893
8	-0.22983624	9.09012220	-2.08923951		8.00000000	4.29250000	39.01934954	0.190374
9	-0.21998796	9.10347650	-2.00265522		9.00000000	3.81555556	34.73482033	0.211739
10	-0.20987321	9.09121700	-1.90800289		10.00000000	3.43400000	31.21923918	0.233093
11	-0.20005322	9.10285090	-1.82105463		11.00000000	3.12181818	28.41744545	0.254476
12	-0.18992209	9.09537600	-1.72741282		12.00000000	2.86166667	26.02793432	0.275966
13	-0.18012963	9.09290120	-1.63790093		13.00000000	2.64153846	24.01924825	0.297342
14	-0.17001043	9.10148240	-1.54734694		14.00000000	2.45285714	22.32463612	0.318746
15	-0.16016288	9.09635540	-1.45689848		15.00000000	2.28933333	20.82458963	0.340115
16	-0.15002880	9.09515090	-1.36453458		16.00000000	2.14625000	19.52046762	0.361596
17	-0.13986270	9.09720040	-1.27235901		17.00000000	2.02000000	18.37634481	0.382969
18	-0.13002482	9.08725360	-1.18156851		18.00000000	1.90777778	17.33646048	0.404358
19	-0.11992646	9.10080620	-1.09142747		19.00000000	1.80736842	16.44850973	0.425712
20	-0.11005436	9.09604170	-1.00105905		20.00000000	1.71700000	15.61790360	0.447191
21	-0.09992101	9.09343050	-0.90862476		21.00000000	1.63523810	14.86992397	0.468583
22	-0.09009505	9.10050490	-0.81991045		22.00000000	1.56090909	14.20506083	0.489971
23	-0.07996691	9.09522910	-0.72731737		23.00000000	1.49304348	13.57957249	0.511456
24	-0.07012086	9.10106850	-0.63817471		24.00000000	1.43083333	13.02211218	0.532841
25	-0.05995699	9.08916090	-0.54495877		25.00000000	1.37360000	12.48487141	0.554189
26	-0.04983630	9.10281750	-0.45365074		26.00000000	1.32076923	12.02272127	0.575575
27	-0.03999843	9.09192660	-0.36366280		27.00000000	1.27185185	11.56358368	0.597057
28	-0.02984350	9.09255410	-0.27135364		28.00000000	1.22642857	11.15136814	0.618429
29	-0.02001605	9.10071470	-0.18216038		29.00000000	1.18413793	10.77650148	0.639798
30	-0.00989833	9.08345510	-0.08991108		30.00000000	1.14466667	10.39752827	0.661173
31	-0.00064175	9.10651400	-0.00584408		31.00000000	1.10774194	10.08766744	0.682772
32	0.00949511	9.08848860	0.08629623		32.00000000	1.07312500	9.75308433	0.704171
33	0.01935950	9.08195880	0.17582214		33.00000000	1.04060606	9.45074137	0.725530
34	0.02951041	9.10111050	0.26857754		34.00000000	1.01000000	9.19212161	0.746909
35	0.03931079	9.09488680	0.35752719		35.00000000	0.98114286	8.92338322	0.768395
36	0.04944162	9.08890250	0.44937004		36.00000000	0.95388889	8.66980311	0.789772
37	0.05926283	9.09897230	0.53923086		37.00000000	0.92810811	8.44482997	0.811133
38	0.06939142	9.07936000	0.63002970		38.00000000	0.90368421	8.20487427	0.832529
39	0.07958328	9.10275940	0.72442745		39.00000000	0.88051282	8.01509635	0.853998
40	0.08937993	9.09440140	0.81285695		40.00000000	0.85850000	7.80754360	0.875385
41	0.09954946	9.09272960	0.90517629		41.00000000	0.83756098	7.61571547	0.896728
42	0.10936918	9.09685990	0.99491611		42.00000000	0.81761905	7.43776593	0.918100
43	0.11950894	9.09372040	1.08678089		43.00000000	0.79860465	7.26228741	0.939589
44	0.12930857	9.08284470	1.17448966		44.00000000	0.78045455	7.08874743	0.960961
45	0.13948628	9.09061340	1.26801585		45.00000000	0.76311111	6.93714809	0.982314
46	0.14927252	9.08985230	1.35686516		46.00000000	0.74652174	6.78577235	1.003674
47	0.15941823	9.08558460	1.44840782		47.00000000	0.73063830	6.63827607	1.025155
48	0.16957138	9.09250550	1.54182871		48.00000000	0.71541667	6.50492998	1.046534
49	0.17939185	9.09841350	1.63218123		49.00000000	0.70081633	6.37631673	1.067929
50	0.18953905	9.08582210	1.72211809		50.00000000	0.68680000	6.24014262	1.089289
51	0.19932306	9.09133240	1.81211219		51.00000000	0.67333333	6.12149715	1.110768
52	0.20947844	9.09942150	1.90613262		52.00000000	0.66038462	6.00911797	1.132152
53	0.21931751	9.10261730	1.99636336		53.00000000	0.64792453	5.89780902	1.153543
54	0.22943866	9.07781120	2.08280084		54.00000000	0.63592593	5.77281549	1.175044
55	0.23928072	9.10031130	2.17752904		55.00000000	0.62436364	5.68190346	1.196432
56	0.24940187	9.07884410	2.26428070		56.00000000	0.61321429	5.56727690	1.217785
57	0.25955054	9.09288310	2.36006272		57.00000000	0.60245614	5.47806326	1.239167
58	0.26932338	9.09269240	2.44887465		58.00000000	0.59206897	5.38350098	1.260656
59	0.27949664	9.09279250	2.54140495		59.00000000	0.58203390	5.29231347	1.282041
60	0.28934836	9.08586220	2.62897933		60.00000000	0.57233333	5.20014180	1.303402
61	0.29950374	9.08421800	2.72075727		61.00000000	0.56295082	5.11396797	1.324786
62	0.30933464	9.08927820	2.81162860		62.00000000	0.55387097	5.03428731	1.346272
63	0.31948334	9.08248230	2.90170178		63.00000000	0.54507937	4.95067369	1.367661
64	0.32927552	9.10013580	2.99645195		64.00000000	0.53656250	4.88279162	1.389017
65	0.33944356	9.08646970	3.08434362		65.00000000	0.52830769	4.80045184	1.410398
66	0.34923723	9.08995530	3.17455081		66.00000000	0.52030303	4.72953129	1.431878
67	0.35939559	9.08689020	3.26578826		67.00000000	0.51253731	4.65737029	1.453261
68	0.36958671	9.08084200	3.35615852		68.00000000	0.50500000	4.58582521	1.474610
69	0.37941164	9.10301590	3.45379019		69.00000000	0.49768116	4.53039951	1.495995
70	0.38953355	9.07888130	3.53652886		70.00000000	0.49057143	4.45383977	1.517509
71	0.39938378	9.09041310	3.63056355		71.00000000	0.48366197	4.39668712	1.538893
72	0.40951833	9.08451180	3.72027410		72.00000000	0.47694444	4.33280743	1.560256
73	0.41933134	9.07656760	3.80608925		73.00000000	0.47041096	4.26971687	1.581644
74	0.42947707	9.08866690	3.90337403		74.00000000	0.46405405	4.21763272	1.603117
75	0.43926999	9.06614400	3.98248498		75.00000000	0.45786667	4.15108513	1.624487
76	0.44942686	9.08539490	4.08322050		76.00000000	0.45184211	4.10516396	1.645839
77	0.45957482	9.07851410	4.17225648		77.00000000	0.44597403	4.04878148	1.667203
78	0.46944663	9.07348730	4.25951804		78.00000000	0.44025641	3.99466095	1.688686
79	0.47957227	9.05947690	4.34467390		79.00000000	0.43468354	3.93800553	1.710061
80	0.48938528	9.05887600	4.43328057		80.00000000	0.42925000	3.88852252	1.731456
81	0.49951237	9.03768350	4.51443470		81.00000000	0.42395062	3.83153150	1.752813
82	0.50932169	9.03981780	4.60417528		82.00000000	0.41878049	3.78569931	1.774286
83	0.51948380	8.99913600	4.67490537		83.00000000	0.41373494	3.72325699	1.795663
84	0.52925289	8.98299500	4.75427606		84.00000000	0.40880952	3.67233391	1.817041
85	0.53938299	8.92567060	4.81435490		85.00000000	0.40400000	3.60597092	1.838550
86	0.54955697	8.87575340	4.87773214		86.00000000	0.39930233	3.54410897	1.859929
87	0.55935884	8.78612230	4.91459518		87.00000000	0.39471264	3.46799356	1.881278
88	0.56951272	8.65888310	4.93134407		88.00000000	0.39022727	3.37893234	1.902659
89	0.57933545	8.49477860	4.92132638		89.00000000	0.38584270	3.27764828	1.924141
90	0.58944470	8.24773310	4.86158256		90.00000000	0.38155556	3.14696839	1.945534
91	0.59922421	7.92760940	4.75041548		91.00000000	0.37736264	2.99158359	1.966893
92	0.60937440	7.47905780	4.55754636		92.00000000	0.37326087	2.79163962	1.988372
93	0.61917776	6.89130540	4.26694304		93.00000000	0.36924731	2.54459599	2.009882
94	0.62928998	6.07365850	3.82209244		94.00000000	0.36531915	2.21882375	2.031277
95	0.63942003	5.05341100	3.23125221		95.00000000	0.36147368	1.82667509	2.052629
96	0.64920253	3.75204060	2.43583425		96.00000000	0.35770833	1.34213619	2.074013
97	0.65927905	2.09059880	1.37828799		97.00000000	0.35402062	0.74011508	2.095539
98	0.66900873	0.13196287	0.08828431		98.00000000	0.35040816	0.04624087	2.116929
99	0.67912465	-2.30230950	-1.56355513		99.00000000	0.34686869	-0.79859907	2.138298
100	0.68882531	-5.07105110	-3.49306835		100.00000000	0.34340000	-1.74139895	2.159694
101	0.69905734	-8.43974780	-5.89986765		101.00000000	0.34000000	-2.86951425	2.181169
