# Supplementary material for: Study on the Electrical Injection Regeneration of Industrialized B-Doped Czochralski Silicon PERC Solar Cells
Source: Hindawi journal article supplement (doi:10.1155/2019/5357370), 2019-06-20
Supplement: f1 [file 5357370.f1.zip › section3.3/IVRawData_3-14-8h.csv]

05:49 04/04/2018
Test Lot:	JK-PERC
Recipe:	Recipe_YJX-LID
Cell Name:	3-14-8h
Test Order:	2
Test Condition:	Light
1	-0.29997665	9.10792920	-2.73216609		1.00000000	34.34000000	312.76628873	0.000000
2	-0.29012698	9.08850670	-2.63682100		2.00000000	17.17000000	156.04966004	0.061793
3	-0.27999669	9.10482880	-2.54932193		3.00000000	11.44666667	104.21994033	0.083265
4	-0.27018198	9.10192300	-2.45917558		4.00000000	8.58500000	78.14000896	0.104763
5	-0.26007327	9.09376430	-2.36504502		5.00000000	6.86800000	62.45597321	0.126154
6	-0.24987973	9.10843850	-2.27601415		6.00000000	5.72333333	52.13062968	0.147522
7	-0.24005906	9.09045120	-2.18224517		7.00000000	4.90571429	44.59515632	0.168893
8	-0.22996376	9.09437470	-2.09137660		8.00000000	4.29250000	39.03760340	0.190377
9	-0.22010587	9.09671970	-2.00224140		9.00000000	3.81555556	34.70903939	0.211764
10	-0.20994061	9.10980700	-1.91251844		10.00000000	3.43400000	31.28307724	0.233112
11	-0.20013632	9.09498600	-1.82023703		11.00000000	3.12181818	28.39289266	0.254483
12	-0.18996659	9.09692960	-1.72811270		12.00000000	2.86166667	26.03238021	0.275965
13	-0.18020472	9.09659290	-1.63924898		13.00000000	2.64153846	24.02900001	0.297329
14	-0.17006700	9.09454150	-1.54668139		14.00000000	2.45285714	22.30761108	0.318675
15	-0.16024560	9.10364530	-1.45881910		15.00000000	2.28933333	20.84127864	0.340059
16	-0.15011010	9.09782120	-1.36567485		16.00000000	2.14625000	19.52619875	0.361532
17	-0.13993664	9.09594150	-1.27285549		17.00000000	2.02000000	18.37380183	0.382910
18	-0.13013682	9.09706970	-1.18386372		18.00000000	1.90777778	17.35518742	0.404277
19	-0.11996114	9.09704300	-1.09129165		19.00000000	1.80736842	16.44170824	0.425632
20	-0.11015312	9.08719540	-1.00098293		20.00000000	1.71700000	15.60271450	0.447103
21	-0.09998116	9.10814290	-0.91064268		21.00000000	1.63523810	14.89398225	0.468474
22	-0.09016199	9.09393410	-0.81992717		22.00000000	1.56090909	14.19480441	0.489853
23	-0.08002426	9.10107230	-0.72830655		23.00000000	1.49304348	13.58829664	0.511202
24	-0.07019690	9.09753700	-0.63861887		24.00000000	1.43083333	13.01705919	0.532672
25	-0.06002642	9.09429170	-0.54589779		25.00000000	1.37360000	12.49191908	0.554045
26	-0.04990507	9.09435840	-0.45385458		26.00000000	1.32076923	12.01154875	0.575438
27	-0.04008589	9.09649090	-0.36464096		27.00000000	1.27185185	11.56938880	0.596915
28	-0.02994519	9.09699630	-0.27241129		28.00000000	1.22642857	11.15681618	0.618288
29	-0.02012527	9.09266950	-0.18299241		29.00000000	1.18413793	10.76697485	0.639632
30	-0.00996001	9.09530930	-0.09058933		30.00000000	1.14466667	10.41109738	0.661013
31	-0.00071541	9.08918760	-0.00650246		31.00000000	1.10774194	10.06847426	0.682612
32	0.00946379	9.09786130	0.08610027		32.00000000	1.07312500	9.76314241	0.703989
33	0.01926036	9.08415790	0.17496417		33.00000000	1.04060606	9.45302977	0.725339
34	0.02939929	9.10157970	0.26757995		34.00000000	1.01000000	9.19259550	0.746717
35	0.03922042	9.08616540	0.35636321		35.00000000	0.98114286	8.91482628	0.768200
36	0.04937497	9.09574130	0.44910197		36.00000000	0.95388889	8.67632656	0.789577
37	0.05918419	9.10296920	0.53875190		37.00000000	0.92810811	8.44853952	0.810936
38	0.06933056	9.10231690	0.63106871		38.00000000	0.90368421	8.22562006	0.832316
39	0.07946055	9.09567640	0.72274749		39.00000000	0.88051282	8.00885968	0.853798
40	0.08928838	9.11035440	0.81344882		40.00000000	0.85850000	7.82123925	0.875186
41	0.09945931	9.07555960	0.90264892		41.00000000	0.83756098	7.60133455	0.896528
42	0.10926928	9.10459800	0.99485287		42.00000000	0.81761905	7.44409275	0.917904
43	0.11942160	9.08866020	1.08538234		43.00000000	0.79860465	7.25824631	0.939388
44	0.12926282	9.09450530	1.17558140		44.00000000	0.78045455	7.09784800	0.960770
45	0.13938984	9.10210700	1.26874124		45.00000000	0.76311111	6.94591899	0.982119
46	0.14920278	9.08362390	1.35530194		46.00000000	0.74652174	6.78112271	1.003485
47	0.15935361	9.10331150	1.45064555		47.00000000	0.73063830	6.65122802	1.024965
48	0.16951412	9.09132770	1.54110841		48.00000000	0.71541667	6.50408736	1.046342
49	0.17931144	9.09214020	1.63032475		49.00000000	0.70081633	6.37192030	1.067700
50	0.18944366	9.09807490	1.72357261		50.00000000	0.68680000	6.24855784	1.089058
51	0.19924620	9.10536960	1.81421029		51.00000000	0.67333333	6.13094886	1.110532
52	0.20936874	9.09799100	1.90483491		52.00000000	0.66038462	6.00817329	1.131913
53	0.21919508	9.09714510	1.99404945		53.00000000	0.64792453	5.89426345	1.153289
54	0.22939652	9.09833340	2.08712602		54.00000000	0.63592593	5.78586609	1.174640
55	0.23920426	9.09519960	2.17561049		55.00000000	0.62436364	5.67871190	1.196113
56	0.24934764	9.10069470	2.26923675		56.00000000	0.61321429	5.58067600	1.217530
57	0.25949922	9.09350400	2.35975720		57.00000000	0.60245614	5.47843732	1.238939
58	0.26932928	9.09774590	2.45028935		58.00000000	0.59206897	5.38649300	1.260417
59	0.27945110	9.09389590	2.54129921		59.00000000	0.58203390	5.29295568	1.281820
60	0.28928414	9.09980010	2.63242785		60.00000000	0.57233333	5.20811892	1.303159
61	0.29940742	9.09342670	2.72263943		61.00000000	0.56295082	5.11915201	1.324534
62	0.30927545	9.08493710	2.80974801		62.00000000	0.55387097	5.03188290	1.346023
63	0.31941810	9.09313680	2.90451248		63.00000000	0.54507937	4.95648123	1.367398
64	0.32923773	9.09269620	2.99365866		64.00000000	0.53656250	4.87879980	1.388750
65	0.33938038	9.09987740	3.08831985		65.00000000	0.52830769	4.80753523	1.410133
66	0.34921119	9.09498600	3.17607088		66.00000000	0.52030303	4.73214878	1.431609
67	0.35933521	9.08466720	3.26444080		67.00000000	0.51253731	4.65623092	1.452986
68	0.36949351	9.09371570	3.36006893		68.00000000	0.50500000	4.59232643	1.474337
69	0.37932879	9.09497260	3.44998495		69.00000000	0.49768116	4.52639651	1.495715
70	0.38945580	9.09409430	3.54174777		70.00000000	0.49057143	4.46130283	1.517202
71	0.39925906	9.08857350	3.62869531		71.00000000	0.48366197	4.39579738	1.538583
72	0.40944263	9.08759400	3.72084839		72.00000000	0.47694444	4.33427747	1.559932
73	0.41922134	9.08327670	3.80790343		73.00000000	0.47041096	4.27287290	1.581315
74	0.42938557	9.07835670	3.89811537		74.00000000	0.46405405	4.21284823	1.602789
75	0.43922532	9.09181500	3.99335535		75.00000000	0.45786667	4.16283903	1.624163
76	0.44937095	9.08000950	4.08029250		76.00000000	0.45184211	4.10273061	1.645519
77	0.45950019	9.08272460	4.17351368		77.00000000	0.44597403	4.05065926	1.666898
78	0.46933547	9.07584000	4.25961363		78.00000000	0.44025641	3.99569674	1.688373
79	0.47947514	9.06097700	4.34451322		79.00000000	0.43468354	3.93865760	1.709760
80	0.48931485	9.05541800	4.43095050		80.00000000	0.42925000	3.88703818	1.731120
81	0.49944633	9.04486940	4.51742683		81.00000000	0.42395062	3.83457797	1.752475
82	0.50931066	9.03820710	4.60325522		82.00000000	0.41878049	3.78502478	1.773960
83	0.51943392	9.00309090	4.67651080		83.00000000	0.41373494	3.72489327	1.795332
84	0.52918285	8.97796920	4.75098733		84.00000000	0.40880952	3.67027931	1.816716
85	0.53934932	8.94528580	4.82463381		85.00000000	0.40400000	3.61389546	1.838075
86	0.54950684	8.85396290	4.86531317		86.00000000	0.39930233	3.53540798	1.859549
87	0.55930936	8.79669570	4.92007424		87.00000000	0.39471264	3.47216702	1.880933
88	0.56944829	8.64876170	4.92502256		88.00000000	0.39022727	3.37498269	1.902325
89	0.57924712	8.48942180	4.91747313		89.00000000	0.38584270	3.27558140	1.923800
90	0.58938754	8.24470620	4.85932711		90.00000000	0.38155556	3.14581345	1.945184
91	0.59917295	7.92362790	4.74762350		91.00000000	0.37736264	2.99008112	1.966530
92	0.60931337	7.46312810	4.54738373		92.00000000	0.37326087	2.78569368	1.987998
93	0.61910766	6.87829450	4.25840481		93.00000000	0.36924731	2.53979175	2.009526
94	0.62921166	6.07077170	3.81980034		94.00000000	0.36531915	2.21776915	2.030917
95	0.63933194	5.02503780	3.21266717		95.00000000	0.36147368	1.81641893	2.052264
96	0.64909804	3.74093680	2.42823474		96.00000000	0.35770833	1.33816427	2.073681
97	0.65923691	2.09285350	1.37968627		97.00000000	0.35402062	0.74091329	2.095164
98	0.66893971	0.12612683	0.08437125		98.00000000	0.35040816	0.04419587	2.116547
99	0.67904961	-2.28461720	-1.55136842		99.00000000	0.34686869	-0.79246217	2.137914
100	0.68876952	-5.03753190	-3.46969843		100.00000000	0.34340000	-1.72988845	2.159289
101	0.69902903	-8.37544630	-5.85468010		101.00000000	0.34000000	-2.84765174	2.180765
05:49 04/04/2018
Test Lot:	JK-PERC
Recipe:	Recipe_YJX-LID
Cell Name:	3-14-8h
Test Order:	3
Test Condition:	Light
1	-0.29997367	9.08560180	-2.72544132		1.00000000	34.34000000	311.99956581	0.000000
2	-0.29010314	9.10350700	-2.64095597		2.00000000	17.17000000	156.30721519	0.021601
3	-0.27998924	9.09175780	-2.54559436		3.00000000	11.44666667	104.07032095	0.043016
4	-0.27016559	9.10265250	-2.45922348		4.00000000	8.58500000	78.14627171	0.064382
5	-0.26003456	9.10090160	-2.36654894		5.00000000	6.86800000	62.50499219	0.085752
6	-0.24987601	9.09306340	-2.27213840		6.00000000	5.72333333	52.04263286	0.107302
7	-0.24007618	9.10075470	-2.18487442		7.00000000	4.90571429	44.64570234	0.128699
8	-0.22990124	9.08993720	-2.08978783		8.00000000	4.29250000	39.01855543	0.150062
9	-0.22008578	9.09856890	-2.00246563		9.00000000	3.81555556	34.71609511	0.171436
10	-0.20992053	9.09709170	-1.90966631		10.00000000	3.43400000	31.23941290	0.192918
11	-0.20011251	9.09997750	-1.82101934		11.00000000	3.12181818	28.40847521	0.214355
12	-0.18995394	9.10023120	-1.72862477		12.00000000	2.86166667	26.04182828	0.235720
13	-0.18018314	9.09698960	-1.63912415		13.00000000	2.64153846	24.03004791	0.257097
14	-0.17006625	9.09957310	-1.54753027		14.00000000	2.45285714	22.31995288	0.278574
15	-0.16023591	9.08814330	-1.45624691		15.00000000	2.28933333	20.80578939	0.299960
16	-0.15010415	9.10625360	-1.36688646		16.00000000	2.14625000	19.54429679	0.321302
17	-0.13996196	9.08786960	-1.27195604		17.00000000	2.02000000	18.35749659	0.342679
18	-0.13010630	9.08955860	-1.18260884		18.00000000	1.90777778	17.34085791	0.364160
19	-0.11999463	9.09143920	-1.09092388		19.00000000	1.80736842	16.43158011	0.385537
20	-0.11014196	9.07430650	-0.99946190		20.00000000	1.71700000	15.58058426	0.406894
21	-0.09999307	9.09969040	-0.90990600		21.00000000	1.63523810	14.88016040	0.428283
22	-0.09017464	9.08646300	-0.81936851		22.00000000	1.56090909	14.18314270	0.449757
23	-0.08003245	9.09682270	-0.72804096		23.00000000	1.49304348	13.58195181	0.471143
24	-0.07019466	9.10731700	-0.63928504		24.00000000	1.43083333	13.03105274	0.492491
25	-0.06007778	9.07960890	-0.54548270		25.00000000	1.37360000	12.47175079	0.513856
26	-0.04994005	9.09954830	-0.45443190		26.00000000	1.32076923	12.01840341	0.535323
27	-0.04011194	9.09540080	-0.36483421		27.00000000	1.27185185	11.56800235	0.556695
28	-0.02997347	9.09211160	-0.27252215		28.00000000	1.22642857	11.15082544	0.578079
29	-0.02012453	9.09523300	-0.18303724		29.00000000	1.18413793	10.77001039	0.599440
30	-0.00998084	9.09242730	-0.09075010		30.00000000	1.14466667	10.40779845	0.620921
31	-0.00070052	9.08507440	-0.00636428		31.00000000	1.10774194	10.06391790	0.642415
32	0.00942956	9.10214040	0.08582915		32.00000000	1.07312500	9.76773442	0.663809
33	0.01926929	9.08155630	0.17499517		33.00000000	1.04060606	9.45032253	0.685210
34	0.02941120	9.09637260	0.26753519		34.00000000	1.01000000	9.18733633	0.706678
35	0.03925763	9.09331700	0.35698208		35.00000000	0.98114286	8.92184302	0.728054
36	0.04934967	9.09747890	0.44895755		36.00000000	0.95388889	8.67798404	0.749450
37	0.05919908	9.09343530	0.53832300		37.00000000	0.92810811	8.43969103	0.770815
38	0.06932759	9.08543110	0.62987100		38.00000000	0.90368421	8.21036063	0.792313
39	0.07949553	9.09407810	0.72293859		39.00000000	0.88051282	8.00745236	0.813695
40	0.08930476	9.09572320	0.81229138		40.00000000	0.85850000	7.80867837	0.835067
41	0.09949057	9.09992890	0.90535710		41.00000000	0.83756098	7.62174533	0.856420
42	0.10928267	9.08564190	0.99290321		42.00000000	0.81761905	7.42859388	0.877895
43	0.11944021	9.10833170	1.08790105		43.00000000	0.79860465	7.27395606	0.899282
44	0.12927994	9.08790970	1.17488442		44.00000000	0.78045455	7.09270043	0.920669
45	0.13938017	9.10401730	1.26891948		45.00000000	0.76311111	6.94737676	0.942012
46	0.14922586	9.07620050	1.35440383		46.00000000	0.74652174	6.77558098	0.963474
47	0.15936404	9.09840200	1.44995810		47.00000000	0.73063830	6.64764095	0.984839
48	0.16945831	9.08687020	1.53984567		48.00000000	0.71541667	6.50089839	1.006221
49	0.17931665	9.10038470	1.63185050		49.00000000	0.70081633	6.37769818	1.027704
50	0.18946896	9.08639910	1.72159059		50.00000000	0.68680000	6.24053890	1.049080
51	0.19923949	9.09648900	1.81237983		51.00000000	0.67333333	6.12496926	1.070429
52	0.20939256	9.09465890	1.90435391		52.00000000	0.66038462	6.00597282	1.091803
53	0.21919210	9.08606240	1.99159310		53.00000000	0.64792453	5.88708269	1.113283
54	0.22934666	9.09816460	2.08663366		54.00000000	0.63592593	5.78575875	1.134660
55	0.23920351	9.11005210	2.17915644		55.00000000	0.62436364	5.68798526	1.156018
56	0.24933128	9.08880710	2.26612391		56.00000000	0.61321429	5.57338635	1.177395
57	0.25948584	9.07939530	2.35597452		57.00000000	0.60245614	5.46993745	1.198874
58	0.26928538	9.09990880	2.45047240		58.00000000	0.59206897	5.38777359	1.220249
59	0.27944291	9.07992940	2.53732189		59.00000000	0.58203390	5.28482671	1.241591
60	0.28927147	9.10125730	2.63273408		60.00000000	0.57233333	5.20895293	1.262973
61	0.29942900	9.10068800	2.72500991		61.00000000	0.56295082	5.12323977	1.284456
62	0.30921218	9.09443470	2.81210998		62.00000000	0.55387097	5.03714335	1.305836
63	0.31939873	9.07579330	2.89879685		63.00000000	0.54507937	4.94702765	1.327198
64	0.32922953	9.08434960	2.99083615		64.00000000	0.53656250	4.87432133	1.348570
65	0.33936772	9.11138530	3.09211006		65.00000000	0.52830769	4.81361494	1.370046
66	0.34918067	9.07745550	3.16967199		66.00000000	0.52030303	4.72302760	1.391414
67	0.35934341	9.10521890	3.27190041		67.00000000	0.51253731	4.66676443	1.412766
68	0.36949721	9.09107400	3.35912648		68.00000000	0.50500000	4.59099237	1.434149
69	0.37934217	9.08951000	3.44803445		69.00000000	0.49768116	4.52367788	1.455630
70	0.38944834	9.08772950	3.53920117		70.00000000	0.49057143	4.45818044	1.477011
71	0.39926726	9.08410930	3.62698743		71.00000000	0.48366197	4.39363822	1.498387
72	0.40943667	9.08843710	3.72113942		72.00000000	0.47694444	4.33467958	1.519748
73	0.41923624	9.07875920	3.80614487		73.00000000	0.47041096	4.27074782	1.541228
74	0.42937368	9.07857040	3.89809918		74.00000000	0.46405405	4.21294740	1.562612
75	0.43921489	9.08129600	3.98864042		75.00000000	0.45786667	4.15802273	1.583996
76	0.44936723	9.08592510	4.08291699		76.00000000	0.45184211	4.10540353	1.605344
77	0.45951656	9.07221410	4.16883261		77.00000000	0.44597403	4.04597185	1.626806
78	0.46937639	9.07412430	4.25917971		78.00000000	0.44025641	3.99494139	1.648185
79	0.47950935	9.06315710	4.34586857		79.00000000	0.43468354	3.93960525	1.669570
80	0.48933274	9.06390480	4.43526537		80.00000000	0.42925000	3.89068114	1.691045
81	0.49945602	9.03276820	4.51147045		81.00000000	0.42395062	3.82944765	1.712481
82	0.50928384	9.03073020	4.59920495		82.00000000	0.41878049	3.78189360	1.733862
83	0.51941162	9.00901700	4.67938811		83.00000000	0.41373494	3.72734511	1.755244
84	0.52918732	8.96918200	4.74637739		84.00000000	0.40880952	3.66668702	1.776721
85	0.53931433	8.93815140	4.82047313		85.00000000	0.40400000	3.61101317	1.798110
86	0.54947931	8.85362910	4.86488601		86.00000000	0.39930233	3.53527469	1.819453
87	0.55929899	8.79438400	4.91869009		87.00000000	0.39471264	3.47125456	1.840825
88	0.56942075	8.65202240	4.92664108		88.00000000	0.39022727	3.37625510	1.862320
89	0.57923597	8.48003770	4.91194286		89.00000000	0.38584270	3.27196061	1.883692
90	0.58939350	8.25083920	4.86299099		90.00000000	0.38155556	3.14815353	1.905052
91	0.59915209	7.92020990	4.74541031		91.00000000	0.37736264	2.98879130	1.926443
92	0.60938901	7.46879580	4.55140208		92.00000000	0.37326087	2.78780921	1.947917
93	0.61917436	6.87319900	4.25570859		93.00000000	0.36924731	2.53791025	2.009633
94	0.62928563	6.06538490	3.81685956		94.00000000	0.36531915	2.21580125	2.031135
95	0.63942599	5.02590850	3.21369652		95.00000000	0.36147368	1.81673366	2.052503
96	0.64920610	3.73573280	2.42526052		96.00000000	0.35770833	1.33630275	2.073837
97	0.65933752	2.07180190	1.36601673		97.00000000	0.35402062	0.73346059	2.095215
98	0.66904396	0.11499916	0.07693949		98.00000000	0.35040816	0.04029664	2.116692
99	0.67912996	-2.30908850	-1.56817118		99.00000000	0.34686869	-0.80095050	2.138066
100	0.68885052	-5.06704810	-3.49043872		100.00000000	0.34340000	-1.74002432	2.159433
101	0.69910473	-8.42427060	-5.88944742		101.00000000	0.34000000	-2.86425200	2.180811
05:49 04/04/2018
Test Lot:	JK-PERC
Recipe:	Recipe_YJX-LID
Cell Name:	3-14-8h
Test Order:	4
Test Condition:	Light
1	-0.29989946	9.10455420	-2.73045089		1.00000000	34.34000000	312.65039123	0.000000
2	-0.29005510	9.09514330	-2.63809270		2.00000000	17.17000000	156.16361046	0.061808
3	-0.27996442	9.09438040	-2.54610293		3.00000000	11.44666667	104.10034098	0.083233
4	-0.27012601	9.10377120	-2.45916539		4.00000000	8.58500000	78.15587575	0.104779
5	-0.25998175	9.09920690	-2.36562773		5.00000000	6.86800000	62.49335299	0.126149
6	-0.24982257	9.10020830	-2.27343743		6.00000000	5.72333333	52.08352550	0.147508
7	-0.23999758	9.10061070	-2.18412454		7.00000000	4.90571429	44.64499592	0.168889
8	-0.22983842	9.10606290	-2.09292311		8.00000000	4.29250000	39.08777500	0.190370
9	-0.22000895	9.09649370	-2.00131003		9.00000000	3.81555556	34.70817707	0.211759
10	-0.20985575	9.09693720	-1.90904458		10.00000000	3.43400000	31.23888234	0.233103
11	-0.20000768	9.09946060	-1.81996200		11.00000000	3.12181818	28.40686155	0.254479
12	-0.18985224	9.08902650	-1.72557204		12.00000000	2.86166667	26.00976417	0.275955
13	-0.18008456	9.10563090	-1.63978353		13.00000000	2.64153846	24.05287424	0.297319
14	-0.16994399	9.09766010	-1.54609266		14.00000000	2.45285714	22.31526056	0.318665
15	-0.16012049	9.09155850	-1.45574480		15.00000000	2.28933333	20.81360793	0.340032
16	-0.14999184	9.10597420	-1.36582183		16.00000000	2.14625000	19.54369713	0.361507
17	-0.13984011	9.09047700	-1.27121330		17.00000000	2.02000000	18.36276354	0.382879
18	-0.13003150	9.09679220	-1.18286953		18.00000000	1.90777778	17.35465801	0.404244
19	-0.11987903	9.08606620	-1.08922880		19.00000000	1.80736842	16.42186912	0.425614
20	-0.11003394	9.09997840	-1.00130648		20.00000000	1.71700000	15.62466291	0.447093
21	-0.09988743	9.09482100	-0.90845831		21.00000000	1.63523810	14.87219777	0.468482
22	-0.09006467	9.10228440	-0.81979421		22.00000000	1.56090909	14.20783847	0.489862
23	-0.07991071	9.10869500	-0.72788228		23.00000000	1.49304348	13.59967767	0.511218
24	-0.07009316	9.08960060	-0.63711885		24.00000000	1.43083333	13.00570353	0.532689
25	-0.05997121	9.09949400	-0.54570767		25.00000000	1.37360000	12.49906496	0.554065
26	-0.04979790	9.09611320	-0.45296737		26.00000000	1.32076923	12.01386643	0.575453
27	-0.04003543	9.10169890	-0.36439043		27.00000000	1.27185185	11.57601260	0.596930
28	-0.02986436	9.08538340	-0.27132912		28.00000000	1.22642857	11.14257378	0.618304
29	-0.02002597	9.10052200	-0.18224675		29.00000000	1.18413793	10.77627329	0.639666
30	-0.00987052	9.07708260	-0.08959554		30.00000000	1.14466667	10.39023388	0.661038
31	-0.00063945	9.11927410	-0.00583132		31.00000000	1.10774194	10.10180234	0.682629
32	0.00950462	9.08999160	0.08639694		32.00000000	1.07312500	9.75469724	0.704014
33	0.01933082	9.09965800	0.17590389		33.00000000	1.04060606	9.46915926	0.725363
34	0.02947482	9.10419850	0.26834457		34.00000000	1.01000000	9.19524049	0.746739
35	0.03929283	9.09233950	0.35726376		35.00000000	0.98114286	8.92088396	0.768217
36	0.04942045	9.08910370	0.44918756		36.00000000	0.95388889	8.66999503	0.789594
37	0.05929428	9.08740810	0.53883132		37.00000000	0.92810811	8.43409714	0.810954
38	0.06941818	9.10405350	0.63198680		38.00000000	0.90368421	8.22718940	0.832327
39	0.07956366	9.09186550	0.72338205		39.00000000	0.88051282	8.00550414	0.853825
40	0.08937646	9.10067560	0.81338621		40.00000000	0.85850000	7.81293000	0.875216
41	0.09952269	9.07906340	0.90357279		41.00000000	0.83756098	7.60426920	0.896569
42	0.10935633	9.10210900	0.99537324		42.00000000	0.81761905	7.44205769	0.917939
43	0.11951520	9.08778670	1.08612865		43.00000000	0.79860465	7.25754873	0.939421
44	0.12933619	9.09774210	1.17666730		44.00000000	0.78045455	7.10037418	0.960805
45	0.13945712	9.09141640	1.26786275		45.00000000	0.76311111	6.93776087	0.982150
46	0.14928927	9.09461780	1.35772885		46.00000000	0.74652174	6.78932990	1.003526
47	0.15943252	9.08338450	1.44818688		47.00000000	0.73063830	6.63666859	1.025003
48	0.16960256	9.08473780	1.54079479		48.00000000	0.71541667	6.49937283	1.046386
49	0.17941312	9.10186860	1.63299464		49.00000000	0.70081633	6.37873812	1.067764
50	0.18956085	9.08820440	1.72276775		50.00000000	0.68680000	6.24177878	1.089121
51	0.19932677	9.09080220	1.81204024		51.00000000	0.67333333	6.12114015	1.110605
52	0.20950350	9.07972240	1.90223362		52.00000000	0.66038462	5.99610898	1.131977
53	0.21932152	9.08972740	1.99357283		53.00000000	0.64792453	5.88945734	1.153352
54	0.22946848	9.09642510	2.08734284		54.00000000	0.63592593	5.78465255	1.174716
55	0.23929246	9.09198760	2.17564408		55.00000000	0.62436364	5.67670644	1.196194
56	0.24943718	9.10248660	2.27049859		56.00000000	0.61321429	5.58177482	1.217570
57	0.25959605	9.09122940	2.36004724		57.00000000	0.60245614	5.47706698	1.238953
58	0.26941258	9.09420390	2.45009294		58.00000000	0.59206897	5.38439590	1.260425
59	0.27956328	9.08748820	2.54052801		59.00000000	0.58203390	5.28922618	1.281802
60	0.28935897	9.09430030	2.63151737		60.00000000	0.57233333	5.20497121	1.303162
61	0.29950520	9.09064580	2.72269569		61.00000000	0.56295082	5.11758650	1.324528
62	0.30933884	9.11329940	2.81909746		62.00000000	0.55387097	5.04759196	1.346039
63	0.31950068	9.07585720	2.89974255		63.00000000	0.54507937	4.94706248	1.367424
64	0.32930753	9.10507680	2.99837035		64.00000000	0.53656250	4.88544277	1.388766
65	0.33944705	9.09539030	3.08740341		65.00000000	0.52830769	4.80516466	1.410146
66	0.34926358	9.08611300	3.17344835		66.00000000	0.52030303	4.72753213	1.431627
67	0.35942990	9.10138510	3.27130994		67.00000000	0.51253731	4.66479947	1.453004
68	0.36956942	9.08602140	3.35791566		68.00000000	0.50500000	4.58844081	1.474358
69	0.37940234	9.08558370	3.44709172		69.00000000	0.49768116	4.52172383	1.495735
70	0.38952771	9.07655810	3.53557089		70.00000000	0.49057143	4.45270007	1.517203
71	0.39937922	9.09983440	3.63428476		71.00000000	0.48366197	4.40124385	1.538599
72	0.40949866	9.07212260	3.71502205		72.00000000	0.47694444	4.32689847	1.559952
73	0.41933677	9.09129810	3.81231558		73.00000000	0.47041096	4.27664626	1.581316
74	0.42950383	9.08156490	3.90056691		74.00000000	0.46405405	4.21433701	1.602806
75	0.43930620	9.09031870	3.99343336		75.00000000	0.45786667	4.16215392	1.624175
76	0.44951198	9.08193870	4.08244025		76.00000000	0.45184211	4.10360230	1.645524
77	0.45961502	9.07356930	4.17034874		77.00000000	0.44597403	4.04657623	1.666902
78	0.46945611	9.07681370	4.26116565		78.00000000	0.44025641	3.99612542	1.688385
79	0.47959045	9.05148120	4.34100394		79.00000000	0.43468354	3.93452993	1.709779
80	0.48940176	9.06427380	4.43607155		80.00000000	0.42925000	3.89083953	1.731125
81	0.49956882	9.03359790	4.51290384		81.00000000	0.42395062	3.82979941	1.752485
82	0.50940174	9.03628830	4.60310098		82.00000000	0.41878049	3.78422122	1.773967
83	0.51953381	9.01699070	4.68463153		83.00000000	0.41373494	3.73064410	1.795322
84	0.52930194	8.98009970	4.75318419		84.00000000	0.40880952	3.67115028	1.816714
85	0.53945261	8.94425300	4.82500063		85.00000000	0.40400000	3.61347821	1.838067
86	0.54958248	8.87028410	4.87495273		86.00000000	0.39930233	3.54192507	1.859557
87	0.55941838	8.78250030	4.91309209		87.00000000	0.39471264	3.46656391	1.880929
88	0.56954002	8.65595050	4.92991022		88.00000000	0.39022727	3.37778796	1.902312
89	0.57933420	8.48396590	4.91505160		89.00000000	0.38584270	3.27347628	1.923788
90	0.58947372	8.24834540	4.86218285		90.00000000	0.38155556	3.14720201	1.945175
91	0.59929770	7.91719250	4.74475526		91.00000000	0.37736264	2.98765264	1.966540
92	0.60939258	7.46069100	4.54648974		92.00000000	0.37326087	2.78478401	1.988014
93	0.61918753	6.87005810	4.25385431		93.00000000	0.36924731	2.53675049	2.009505
94	0.62929881	6.05112930	3.80796847		94.00000000	0.36531915	2.21059341	2.030895
95	0.63943088	5.03059580	3.21671830		95.00000000	0.36147368	1.81842800	2.052253
96	0.64919156	3.72216270	2.41639661		96.00000000	0.35770833	1.33144862	2.073638
97	0.65932739	2.08088780	1.37198632		97.00000000	0.35402062	0.73667719	2.095115
98	0.66903448	0.11311992	0.07568113		98.00000000	0.35040816	0.03963814	2.116535
99	0.67912638	-2.30494520	-1.56534909		99.00000000	0.34686869	-0.79951331	2.137912
100	0.68883651	-5.08255200	-3.50104738		100.00000000	0.34340000	-1.74534836	2.159299
101	0.69909286	-8.43673130	-5.89805861		101.00000000	0.34000000	-2.86848864	2.180777
