# Supplementary material for: Study on the Electrical Injection Regeneration of Industrialized B-Doped Czochralski Silicon PERC Solar Cells
Source: Hindawi journal article supplement (doi:10.1155/2019/5357370), 2019-06-20
Supplement: f1 [file 5357370.f1.zip › section3.3/IVRawData_3-14-9h.csv]

06:50 04/04/2018
Test Lot:	JK-PERC
Recipe:	Recipe_YJX-LID
Cell Name:	3-14-9h
Test Order:	2
Test Condition:	Light
1	-0.29993388	9.10185430	-2.72995448		1.00000000	34.34000000	312.55767666	0.000000
2	-0.29009902	9.10702130	-2.64193795		2.00000000	17.17000000	156.36755572	0.061779
3	-0.27992183	9.10058590	-2.54745266		3.00000000	11.44666667	104.17137327	0.083191
4	-0.27018225	9.09377190	-2.45697575		4.00000000	8.58500000	78.07003176	0.104683
5	-0.25998047	9.09450820	-2.36439452		5.00000000	6.86800000	62.46108232	0.126111
6	-0.24981444	9.08280560	-2.26901599		6.00000000	5.72333333	51.98392405	0.147509
7	-0.23997363	9.10798260	-2.18567565		7.00000000	4.90571429	44.68116035	0.168854
8	-0.22988276	9.10425760	-2.09291186		8.00000000	4.29250000	39.08002575	0.190333
9	-0.22002260	9.09036920	-2.00008667		9.00000000	3.81555556	34.68480870	0.211714
10	-0.20997564	9.10272410	-1.91135032		10.00000000	3.43400000	31.25875456	0.233106
11	-0.20015718	9.09674070	-1.82077797		11.00000000	3.12181818	28.39837051	0.254578
12	-0.18995169	9.09594630	-1.72779037		12.00000000	2.86166667	26.02956633	0.275975
13	-0.18018681	9.10187240	-1.64003735		13.00000000	2.64153846	24.04294602	0.297327
14	-0.17003043	9.09642030	-1.54666826		14.00000000	2.45285714	22.31221951	0.318757
15	-0.16021791	9.09747510	-1.45757845		15.00000000	2.28933333	20.82715300	0.340238
16	-0.15001020	9.10394190	-1.36568415		16.00000000	2.14625000	19.53933530	0.361624
17	-0.13992080	9.10572810	-1.27408076		17.00000000	2.02000000	18.39357076	0.382995
18	-0.13002716	9.10146050	-1.18343706		18.00000000	1.90777778	17.36356409	0.404378
19	-0.11994895	9.11281870	-1.09307303		19.00000000	1.80736842	16.47022075	0.425852
20	-0.11013866	9.09549430	-1.00176555		20.00000000	1.71700000	15.61696371	0.447234
21	-0.09995252	9.10147570	-0.90971542		21.00000000	1.63523810	14.88307979	0.468572
22	-0.09012884	9.11057570	-0.82112561		22.00000000	1.56090909	14.22078043	0.489942
23	-0.07998215	9.10067270	-0.72789134		23.00000000	1.49304348	13.58770002	0.511413
24	-0.07014582	9.09741500	-0.63814560		24.00000000	1.43083333	13.01688463	0.532782
25	-0.06001624	9.10475160	-0.54643293		25.00000000	1.37360000	12.50628680	0.554121
26	-0.04986954	9.10128880	-0.45387709		26.00000000	1.32076923	12.02070221	0.575490
27	-0.04008307	9.09290220	-0.36447146		27.00000000	1.27185185	11.56482450	0.596974
28	-0.02992819	9.10377220	-0.27245944		28.00000000	1.22642857	11.16512633	0.618355
29	-0.02010302	9.09711460	-0.18287951		29.00000000	1.18413793	10.77223846	0.639711
30	-0.00990497	9.09960460	-0.09013135		30.00000000	1.14466667	10.41601407	0.661090
31	-0.00065811	9.10093500	-0.00598939		31.00000000	1.10774194	10.08148735	0.682688
32	0.00951294	9.11052230	0.08666786		32.00000000	1.07312500	9.77672924	0.704078
33	0.01926638	9.09365650	0.17520184		33.00000000	1.04060606	9.46291407	0.725448
34	0.02943437	9.10885720	0.26811347		34.00000000	1.01000000	9.19994577	0.746815
35	0.03926372	9.08411600	0.35667621		35.00000000	0.98114286	8.91281553	0.768289
36	0.04938855	9.11277390	0.45006665		36.00000000	0.95388889	8.69257377	0.789662
37	0.05925734	9.09435750	0.53890746		37.00000000	0.92810811	8.44054693	0.811055
38	0.06935240	9.10594840	0.63151934		38.00000000	0.90368421	8.22890179	0.832399
39	0.07950252	9.10098460	0.72355124		39.00000000	0.88051282	8.01353362	0.853877
40	0.08932593	9.10487170	0.81330110		40.00000000	0.85850000	7.81653235	0.875265
41	0.09951475	9.08701800	0.90429235		41.00000000	0.83756098	7.61093166	0.896640
42	0.10931285	9.10645580	0.99545264		42.00000000	0.81761905	7.44561172	0.918129
43	0.11943172	9.10740180	1.08771266		43.00000000	0.79860465	7.27321344	0.939499
44	0.12929232	9.09207340	1.17553526		44.00000000	0.78045455	7.09595001	0.960847
45	0.13943575	9.10209940	1.26915806		45.00000000	0.76311111	6.94591319	0.982226
46	0.14927627	9.10626220	1.35934885		46.00000000	0.74652174	6.79802269	1.003701
47	0.15938844	9.11521530	1.45285995		47.00000000	0.73063830	6.65992539	1.025098
48	0.16956685	9.08060930	1.53977032		48.00000000	0.71541667	6.49641924	1.046457
49	0.17933518	9.10065080	1.63206685		49.00000000	0.70081633	6.37788466	1.067829
50	0.18948902	9.09849830	1.72406553		50.00000000	0.68680000	6.24884863	1.089302
51	0.19930498	9.10396580	1.81446572		51.00000000	0.67333333	6.13000364	1.110698
52	0.20944098	9.10230640	1.90639597		52.00000000	0.66038462	6.01102311	1.132080
53	0.21927702	9.09927460	1.99526182		53.00000000	0.64792453	5.89564320	1.153454
54	0.22940110	9.10857010	2.08951600		54.00000000	0.63592593	5.79237587	1.174931
55	0.23925056	9.08489700	2.17356669		55.00000000	0.62436364	5.67227933	1.196306
56	0.24941184	9.09523390	2.26845902		56.00000000	0.61321429	5.57732736	1.217651
57	0.25950688	9.09833620	2.36108084		57.00000000	0.60245614	5.48134851	1.239031
58	0.26938015	9.09802910	2.45082844		58.00000000	0.59206897	5.38666068	1.260499
59	0.27948636	9.09861660	2.54293923		59.00000000	0.58203390	5.29570329	1.281884
60	0.28929192	9.09077450	2.62988761		60.00000000	0.57233333	5.20295327	1.303232
61	0.29945394	9.09462170	2.72342030		61.00000000	0.56295082	5.11982474	1.324599
62	0.30928108	9.09604840	2.81323567		62.00000000	0.55387097	5.03803713	1.346075
63	0.31940141	9.09024240	2.90343624		63.00000000	0.54507937	4.95490356	1.367460
64	0.32926425	9.10982800	2.99954068		64.00000000	0.53656250	4.88799209	1.388830
65	0.33942482	9.08687590	3.08431122		65.00000000	0.52830769	4.80066644	1.410198
66	0.34923929	9.10374160	3.17938425		66.00000000	0.52030303	4.73670434	1.431675
67	0.35937899	9.09326460	3.26792825		67.00000000	0.51253731	4.66063741	1.453057
68	0.36952242	9.09164910	3.35956818		68.00000000	0.50500000	4.59128280	1.474443
69	0.37934583	9.09229850	3.44912552		69.00000000	0.49768116	4.52506566	1.495788
70	0.38945726	9.08892920	3.53974946		70.00000000	0.49057143	4.45876898	1.517263
71	0.39928660	9.09544560	3.63168955		71.00000000	0.48366197	4.39912115	1.538639
72	0.40947989	9.09206960	3.72301966		72.00000000	0.47694444	4.33641208	1.560020
73	0.41928321	9.08232880	3.80806797		73.00000000	0.47041096	4.27242700	1.581499
74	0.42944598	9.10717300	3.91103883		74.00000000	0.46405405	4.22622055	1.602873
75	0.43926120	9.07212350	3.98503186		75.00000000	0.45786667	4.15382295	1.624225
76	0.44937187	9.08888720	4.08429024		76.00000000	0.45184211	4.10674193	1.645604
77	0.45956665	9.07754710	4.17173791		77.00000000	0.44597403	4.04835023	1.667091
78	0.46943173	9.09281540	4.26845606		78.00000000	0.44025641	4.00317027	1.688472
79	0.47955954	9.06870560	4.34898429		79.00000000	0.43468354	3.94201709	1.709840
80	0.48930553	9.06155780	4.43387034		80.00000000	0.42925000	3.88967369	1.731210
81	0.49951968	9.05748750	4.52439326		81.00000000	0.42395062	3.83992742	1.752685
82	0.50931031	9.03040790	4.59927985		82.00000000	0.41878049	3.78175863	1.774083
83	0.51942098	9.02238560	4.68641637		83.00000000	0.41373494	3.73287616	1.795436
84	0.52925855	8.98036190	4.75293332		84.00000000	0.40880952	3.67125747	1.816814
85	0.53937817	8.93134020	4.81736993		85.00000000	0.40400000	3.60826144	1.838295
86	0.54953420	8.88625720	4.88330224		86.00000000	0.39930233	3.54830317	1.859672
87	0.55936730	8.76603320	4.90343232		87.00000000	0.39471264	3.46006414	1.881055
88	0.56944674	8.67774300	4.94151246		88.00000000	0.39022727	3.38629198	1.902440
89	0.57929766	8.47822090	4.91141353		89.00000000	0.38584270	3.27125961	1.923910
90	0.58945227	8.24602220	4.86063650		90.00000000	0.38155556	3.14631558	1.945292
91	0.59922582	7.91576860	4.74333293		91.00000000	0.37736264	2.98711532	1.966636
92	0.60933799	7.45747380	4.54412210		92.00000000	0.37326087	2.78358316	1.988110
93	0.61915022	6.88012310	4.25982973		93.00000000	0.36924731	2.54046696	2.009622
94	0.62926984	6.05472950	3.81005866		94.00000000	0.36531915	2.21190863	2.031004
95	0.63938648	5.01501320	3.20653164		95.00000000	0.36147368	1.81279530	2.052365
96	0.64916146	3.72577910	2.41863220		96.00000000	0.35770833	1.33274223	2.073734
97	0.65925056	2.06099650	1.35871310		97.00000000	0.35402062	0.72963526	2.095226
98	0.66896826	0.12059704	0.08067559		98.00000000	0.35040816	0.04225819	2.116657
99	0.67907673	-2.27970960	-1.54809774		99.00000000	0.34686869	-0.79075988	2.138066
100	0.68882793	-5.02273700	-3.45980153		100.00000000	0.34340000	-1.72480789	2.159424
101	0.69899070	-8.33128070	-5.82348773		101.00000000	0.34000000	-2.83263544	2.180902
06:50 04/04/2018
Test Lot:	JK-PERC
Recipe:	Recipe_YJX-LID
Cell Name:	3-14-9h
Test Order:	3
Test Condition:	Light
1	-0.29994726	9.10077950	-2.72975387		1.00000000	34.34000000	312.52076803	0.000000
2	-0.29011485	9.10677430	-2.64201046		2.00000000	17.17000000	156.36331473	0.061821
3	-0.27996537	9.09346870	-2.54585633		3.00000000	11.44666667	104.08990505	0.083251
4	-0.27015826	9.09813310	-2.45793581		4.00000000	8.58500000	78.10747266	0.104742
5	-0.25997382	9.10116000	-2.36606333		5.00000000	6.86800000	62.50676688	0.126128
6	-0.24984296	9.08776380	-2.27051381		6.00000000	5.72333333	52.01230148	0.147474
7	-0.24000756	9.10942460	-2.18633077		7.00000000	4.90571429	44.68823439	0.168851
8	-0.22985438	9.09850030	-2.09133015		8.00000000	4.29250000	39.05531254	0.190346
9	-0.22001971	9.10780050	-2.00389562		9.00000000	3.81555556	34.75131880	0.211730
10	-0.20986503	9.09789560	-1.90933013		10.00000000	3.43400000	31.24217349	0.233086
11	-0.20004304	9.09835620	-1.82006283		11.00000000	3.12181818	28.40341381	0.254455
12	-0.18989432	9.09413620	-1.72692481		12.00000000	2.86166667	26.02438643	0.275941
13	-0.18011251	9.09823320	-1.63870562		13.00000000	2.64153846	24.03333293	0.297343
14	-0.16994740	9.10220150	-1.54689548		14.00000000	2.45285714	22.32639997	0.318732
15	-0.16017899	9.09840300	-1.45737300		15.00000000	2.28933333	20.82927727	0.340072
16	-0.15003473	9.09647370	-1.36478698		16.00000000	2.14625000	19.52330668	0.361547
17	-0.13985251	9.10376070	-1.27318378		17.00000000	2.02000000	18.38959661	0.382922
18	-0.13005656	9.09062290	-1.18229514		18.00000000	1.90777778	17.34288835	0.404304
19	-0.11990932	9.10823150	-1.09216185		19.00000000	1.80736842	16.46192998	0.425729
20	-0.11007765	9.09214310	-1.00084175		20.00000000	1.71700000	15.61120970	0.447197
21	-0.09993859	9.10520550	-0.90996144		21.00000000	1.63523810	14.88917890	0.468573
22	-0.09013595	9.09466840	-0.81975655		22.00000000	1.56090909	14.19595058	0.489932
23	-0.07998276	9.09501360	-0.72744427		23.00000000	1.49304348	13.57925074	0.511291
24	-0.07013918	9.10232350	-0.63842948		24.00000000	1.43083333	13.02390787	0.532778
25	-0.06000980	9.09503170	-0.54579103		25.00000000	1.37360000	12.49293554	0.554166
26	-0.04983800	9.11017230	-0.45403276		26.00000000	1.32076923	12.03243526	0.575524
27	-0.04007033	9.08908750	-0.36420276		27.00000000	1.27185185	11.55997277	0.596892
28	-0.02989928	9.11231520	-0.27245164		28.00000000	1.22642857	11.17560371	0.618369
29	-0.02008323	9.09744170	-0.18270605		29.00000000	1.18413793	10.77262579	0.639746
30	-0.00993525	9.10264210	-0.09043703		30.00000000	1.14466667	10.41949099	0.661142
31	-0.00066326	9.09384250	-0.00603159		31.00000000	1.10774194	10.07363069	0.682605
32	0.00950982	9.10748860	0.08661057		32.00000000	1.07312500	9.77347370	0.704076
33	0.01926902	9.09321980	0.17521744		33.00000000	1.04060606	9.46245963	0.725462
34	0.02942862	9.10586360	0.26797304		34.00000000	1.01000000	9.19692224	0.746844
35	0.03926299	9.08862210	0.35684649		35.00000000	0.98114286	8.91723665	0.768322
36	0.04940473	9.09687810	0.44942883		36.00000000	0.95388889	8.67741094	0.789710
37	0.05925250	9.10909560	0.53973666		37.00000000	0.92810811	8.45422548	0.811050
38	0.06943592	9.09681130	0.63164543		38.00000000	0.90368421	8.22064474	0.832429
39	0.07952110	9.09216310	0.72301878		39.00000000	0.88051282	8.00576618	0.853917
40	0.08937854	9.09973340	0.81332085		40.00000000	0.85850000	7.81212112	0.875282
41	0.09950688	9.09480670	0.90499581		41.00000000	0.83756098	7.61745517	0.896633
42	0.10927650	9.08560470	0.99284308		42.00000000	0.81761905	7.42856346	0.918009
43	0.11950978	9.10249520	1.08783720		43.00000000	0.79860465	7.26929500	0.939488
44	0.12931959	9.09179310	1.17574696		44.00000000	0.78045455	7.09573125	0.960875
45	0.13949482	9.10451510	1.27003270		45.00000000	0.76311111	6.94775663	0.982221
46	0.14930239	9.10089680	1.35878564		46.00000000	0.74652174	6.79401731	1.003588
47	0.15940022	9.08761020	1.44856707		47.00000000	0.73063830	6.63975605	1.025067
48	0.16952114	9.08742330	1.54051036		48.00000000	0.71541667	6.50129409	1.046445
49	0.17937337	9.10713290	1.63357712		49.00000000	0.70081633	6.38242742	1.067842
50	0.18951435	9.08531570	1.72179770		50.00000000	0.68680000	6.23979482	1.089224
51	0.19932789	9.10515210	1.81491076		51.00000000	0.67333333	6.13080241	1.110708
52	0.20945996	9.09425260	1.90488179		52.00000000	0.66038462	6.00570451	1.132097
53	0.21926010	9.08615020	1.99223020		53.00000000	0.64792453	5.88713958	1.153451
54	0.22939141	9.10808940	2.08931747		54.00000000	0.63592593	5.79207019	1.174828
55	0.23926151	9.09030720	2.17496063		55.00000000	0.62436364	5.67565726	1.196298
56	0.24940027	9.09772400	2.26897482		56.00000000	0.61321429	5.57885432	1.217681
57	0.25950703	9.09670260	2.36065827		57.00000000	0.60245614	5.48036434	1.239043
58	0.26934439	9.08794400	2.44778673		58.00000000	0.59206897	5.38068960	1.260416
59	0.27951142	9.10152240	2.54397945		59.00000000	0.58203390	5.29739456	1.281902
60	0.28930709	9.09093190	2.63007105		60.00000000	0.57233333	5.20304336	1.303298
61	0.29946446	9.09384730	2.72328407		61.00000000	0.56295082	5.11938879	1.324691
62	0.30929735	9.09670930	2.81358808		62.00000000	0.55387097	5.03840318	1.346035
63	0.31948000	9.09061810	2.90427067		63.00000000	0.54507937	4.95510834	1.367498
64	0.32928759	9.10024550	2.99659791		64.00000000	0.53656250	4.88285048	1.388889
65	0.33938468	9.09643080	3.08718926		65.00000000	0.52830769	4.80571436	1.410283
66	0.34926444	9.10183810	3.17894839		66.00000000	0.52030303	4.73571394	1.431780
67	0.35936823	9.06929590	3.25921681		67.00000000	0.51253731	4.64835256	1.453162
68	0.36954570	9.11009030	3.36659470		68.00000000	0.50500000	4.60059560	1.474501
69	0.37938079	9.09206010	3.44935294		69.00000000	0.49768116	4.52494701	1.495877
70	0.38951436	9.08255670	3.53778626		70.00000000	0.49057143	4.45564282	1.517358
71	0.39933458	9.10106180	3.63436869		71.00000000	0.48366197	4.40183750	1.538738
72	0.40952098	9.08119870	3.71894139		72.00000000	0.47694444	4.33122727	1.560101
73	0.41931441	9.08721830	3.81040158		73.00000000	0.47041096	4.27472707	1.581466
74	0.42944798	9.08046250	3.89958628		74.00000000	0.46405405	4.21382544	1.602935
75	0.43930617	9.09617710	3.99600672		75.00000000	0.45786667	4.16483629	1.624321
76	0.44943896	9.06989670	4.07636494		76.00000000	0.45184211	4.09816122	1.645668
77	0.45958367	9.08662220	4.17606318		77.00000000	0.44597403	4.05239749	1.667038
78	0.46942401	9.06751730	4.25651033		78.00000000	0.44025641	3.99203262	1.688516
79	0.47956946	9.06679920	4.34816000		79.00000000	0.43468354	3.94118841	1.709896
80	0.48936886	9.05891900	4.43315286		80.00000000	0.42925000	3.88854098	1.731255
81	0.49951208	9.06496520	4.52805962		81.00000000	0.42395062	3.84309759	1.752629
82	0.50935316	9.03661920	4.60283055		82.00000000	0.41878049	3.78435980	1.774110
83	0.51949418	9.01099300	4.68115842		83.00000000	0.41373494	3.72816265	1.795491
84	0.52926302	8.98636150	4.75614883		84.00000000	0.40880952	3.67371017	1.816843
85	0.53941596	8.92579750	4.81471763		85.00000000	0.40400000	3.60602219	1.838212
86	0.54956961	8.88409140	4.88242665		86.00000000	0.39930233	3.54743836	1.859693
87	0.55938834	8.78415300	4.91375276		87.00000000	0.39471264	3.46721625	1.881078
88	0.56950104	8.66579630	4.93518001		88.00000000	0.39022727	3.38163006	1.902441
89	0.57931828	8.49083420	4.91889546		89.00000000	0.38584270	3.27612636	1.923817
90	0.58942801	8.25189970	4.86390082		90.00000000	0.38155556	3.14855817	1.945290
91	0.59922445	7.90377860	4.73613738		91.00000000	0.37736264	2.98259074	1.966658
92	0.60934091	7.47173020	4.55283088		92.00000000	0.37326087	2.78890451	1.988143
93	0.61913359	6.88012650	4.25971742		93.00000000	0.36924731	2.54046822	2.009551
94	0.62925893	6.04747100	3.80542513		94.00000000	0.36531915	2.20925696	2.031045
95	0.63939172	5.03406430	3.21873903		95.00000000	0.36147368	1.81968177	2.052441
96	0.64917254	3.71587160	2.41224180		96.00000000	0.35770833	1.32919824	2.073829
97	0.65930980	2.06539770	1.36173694		97.00000000	0.35402062	0.73119337	2.095316
98	0.66894323	0.10466170	0.07001274		98.00000000	0.35040816	0.03667431	2.116700
99	0.67906266	-2.31111620	-1.56939271		99.00000000	0.34686869	-0.80165384	2.138047
100	0.68877721	-5.06462000	-3.48839483		100.00000000	0.34340000	-1.73919051	2.159445
101	0.69902980	-8.41018960	-5.87897315		101.00000000	0.34000000	-2.85946446	2.180934
06:50 04/04/2018
Test Lot:	JK-PERC
Recipe:	Recipe_YJX-LID
Cell Name:	3-14-9h
Test Order:	4
Test Condition:	Light
1	-0.29994091	9.10308840	-2.73038862		1.00000000	34.34000000	312.60005566	0.000000
2	-0.29010922	9.09425350	-2.63832679		2.00000000	17.17000000	156.14833260	0.061795
3	-0.27997687	9.08944700	-2.54483492		3.00000000	11.44666667	104.04386999	0.083208
4	-0.27015930	9.11087700	-2.46138815		4.00000000	8.58500000	78.21687905	0.104708
5	-0.25999719	9.08275790	-2.36149153		5.00000000	6.86800000	62.38038126	0.126091
6	-0.24981570	9.10758300	-2.27521722		6.00000000	5.72333333	52.12573337	0.147451
7	-0.24002123	9.10463520	-2.18530574		7.00000000	4.90571429	44.66473897	0.168819
8	-0.22989556	9.10176180	-2.09245463		8.00000000	4.29250000	39.06931253	0.190312
9	-0.22004303	9.09720040	-2.00177554		9.00000000	3.81555556	34.71087353	0.211748
10	-0.20991364	9.10271260	-1.91078354		10.00000000	3.43400000	31.25871507	0.233150
11	-0.20005442	9.09481910	-1.81945876		11.00000000	3.12181818	28.39237163	0.254495
12	-0.18991016	9.09776970	-1.72775890		12.00000000	2.86166667	26.03478429	0.275973
13	-0.18013652	9.09916110	-1.63909122		13.00000000	2.64153846	24.03578401	0.297347
14	-0.16999151	9.09289840	-1.54571553		14.00000000	2.45285714	22.30358079	0.318723
15	-0.16015536	9.09696870	-1.45692830		15.00000000	2.28933333	20.82599368	0.340153
16	-0.14998205	9.10115720	-1.36501021		16.00000000	2.14625000	19.53335864	0.361615
17	-0.13983928	9.09653090	-1.27205233		17.00000000	2.02000000	18.37499242	0.382990
18	-0.13002694	9.10352040	-1.18370290		18.00000000	1.90777778	17.36749392	0.404407
19	-0.11989755	9.08831500	-1.08966670		19.00000000	1.80736842	16.42593353	0.425762
20	-0.11009564	9.09208680	-1.00099912		20.00000000	1.71700000	15.61111304	0.447250
21	-0.09994318	9.09019760	-0.90850322		21.00000000	1.63523810	14.86463741	0.468637
22	-0.09009363	9.09534170	-0.81943233		22.00000000	1.56090909	14.19700154	0.490040
23	-0.07999922	9.09265420	-0.72740527		23.00000000	1.49304348	13.57572805	0.511412
24	-0.07013033	9.09949020	-0.63815021		24.00000000	1.43083333	13.01985389	0.532896
25	-0.05997042	9.09210210	-0.54525722		25.00000000	1.37360000	12.48891144	0.554279
26	-0.04984178	9.09981250	-0.45355082		26.00000000	1.32076923	12.01875236	0.575665
27	-0.04004210	9.09429650	-0.36415472		27.00000000	1.27185185	11.56659784	0.597009
28	-0.02988368	9.11121560	-0.27227668		28.00000000	1.22642857	11.17425513	0.618481
29	-0.02006837	9.09365270	-0.18249482		29.00000000	1.18413793	10.76813909	0.639857
30	-0.00995908	9.10226250	-0.09065016		30.00000000	1.14466667	10.41905648	0.661241
31	-0.00071164	9.09550190	-0.00647273		31.00000000	1.10774194	10.07546888	0.682829
32	0.00944285	9.09193520	0.08585374		32.00000000	1.07312500	9.75678296	0.704224
33	0.01927871	9.09024810	0.17524829		33.00000000	1.04060606	9.45936727	0.725566
34	0.02943163	9.10628800	0.26801290		34.00000000	1.01000000	9.19735088	0.746938
35	0.03922954	9.09202860	0.35667612		35.00000000	0.98114286	8.92057892	0.768426
36	0.04937874	9.11247250	0.44996239		36.00000000	0.95388889	8.69228627	0.789805
37	0.05916846	9.08068370	0.53729009		37.00000000	0.92810811	8.42785617	0.811161
38	0.06939655	9.10271930	0.63169730		38.00000000	0.90368421	8.22598370	0.832530
39	0.07953681	9.08743570	0.72278566		39.00000000	0.88051282	8.00160364	0.854016
40	0.08933695	9.09274480	0.81231812		40.00000000	0.85850000	7.80612141	0.875402
41	0.09951741	9.09969900	0.90557843		41.00000000	0.83756098	7.62155277	0.896756
42	0.10928258	9.08075710	0.99236856		42.00000000	0.81761905	7.42459997	0.918160
43	0.11944441	9.10221390	1.08720857		43.00000000	0.79860465	7.26907036	0.939658
44	0.12927136	9.09557150	1.17579690		44.00000000	0.78045455	7.09868012	0.961040
45	0.13946372	9.09747220	1.26876732		45.00000000	0.76311111	6.94238212	0.982392
46	0.14928098	9.10000230	1.35845726		46.00000000	0.74652174	6.79334954	1.003786
47	0.15944283	9.09323500	1.44985112		47.00000000	0.73063830	6.64386574	1.025269
48	0.16956151	9.09872720	1.54279392		48.00000000	0.71541667	6.50938108	1.046645
49	0.17938770	9.09064870	1.63075056		49.00000000	0.70081633	6.37087503	1.068008
50	0.18949671	9.08602520	1.72177188		50.00000000	0.68680000	6.24028211	1.089375
51	0.19928718	9.09986880	1.81348719		51.00000000	0.67333333	6.12724499	1.110849
52	0.20945200	9.08853910	1.90361269		52.00000000	0.66038462	6.00193140	1.132217
53	0.21925661	9.08470340	1.99188127		53.00000000	0.64792453	5.88620217	1.153578
54	0.22944748	9.09304140	2.08637543		54.00000000	0.63592593	5.78250077	1.174942
55	0.23927070	9.10222720	2.17789627		55.00000000	0.62436364	5.68309967	1.196405
56	0.24940352	9.09711550	2.26885263		56.00000000	0.61321429	5.57848118	1.217778
57	0.25954378	9.09298130	2.36002674		57.00000000	0.60245614	5.47812242	1.239183
58	0.26935136	9.10371400	2.45209775		58.00000000	0.59206897	5.39002653	1.260528
59	0.27951321	9.09070870	2.54097317		59.00000000	0.58203390	5.29110062	1.282001
60	0.28931484	9.09700200	2.63189768		60.00000000	0.57233333	5.20651748	1.303386
61	0.29946628	9.09818650	2.72460007		61.00000000	0.56295082	5.12183155	1.324763
62	0.30929619	9.08619210	2.81032460		62.00000000	0.55387097	5.03257801	1.346250
63	0.31940296	9.09782790	2.90587316		63.00000000	0.54507937	4.95903826	1.367641
64	0.32924107	9.09703540	2.99511767		64.00000000	0.53656250	4.88112806	1.388987
65	0.33937985	9.08741570	3.08408578		65.00000000	0.52830769	4.80095162	1.410363
66	0.34922984	9.09921460	3.17771726		66.00000000	0.52030303	4.73434893	1.431840
67	0.35935077	9.08872890	3.26604173		67.00000000	0.51253731	4.65831269	1.453238
68	0.36952525	9.08943180	3.35877456		68.00000000	0.50500000	4.59016306	1.474599
69	0.37934253	9.09149460	3.44879056		69.00000000	0.49768116	4.52466557	1.495982
70	0.38949022	9.10576340	3.54660579		70.00000000	0.49057143	4.46702736	1.517471
71	0.39931047	9.09097190	3.63012026		71.00000000	0.48366197	4.39695740	1.538853
72	0.40949315	9.07287980	3.71528213		72.00000000	0.47694444	4.32725962	1.560206
73	0.41926131	9.09629440	3.81372431		73.00000000	0.47041096	4.27899657	1.581577
74	0.42941794	9.07938190	3.89884947		74.00000000	0.46405405	4.21332398	1.603060
75	0.43922254	9.08730030	3.99134712		75.00000000	0.45786667	4.16077190	1.624436
76	0.44940597	9.08189870	4.08145949		76.00000000	0.45184211	4.10358423	1.645777
77	0.45955738	9.07899760	4.17232035		77.00000000	0.44597403	4.04899711	1.667239
78	0.46941781	9.07254890	4.25881604		78.00000000	0.44025641	3.99424781	1.688732
79	0.47955808	9.06789490	4.34858227		79.00000000	0.43468354	3.94166469	1.710131
80	0.48939320	9.06653790	4.43710200		80.00000000	0.42925000	3.89181139	1.731484
81	0.49950445	9.03851030	4.51477612		81.00000000	0.42395062	3.83188202	1.752856
82	0.50932097	9.03507230	4.60175179		82.00000000	0.41878049	3.78371199	1.774333
83	0.51945674	9.01377580	4.68226659		83.00000000	0.41373494	3.72931399	1.795711
84	0.52924502	8.97704120	4.75105435		84.00000000	0.40880952	3.66989994	1.817067
85	0.53935027	8.93838600	4.82092090		85.00000000	0.40400000	3.61110794	1.838438
86	0.54953742	8.86403660	4.87111980		86.00000000	0.39930233	3.53943043	1.859917
87	0.55934131	8.78888800	4.91598813		87.00000000	0.39471264	3.46908522	1.881300
88	0.56948900	8.65819640	4.93074761		88.00000000	0.39022727	3.37866437	1.902695
89	0.57931370	8.48882100	4.91769030		89.00000000	0.38584270	3.27534959	1.924041
90	0.58942050	8.25404830	4.86510528		90.00000000	0.38155556	3.14937798	1.945508
91	0.59920424	7.92142250	4.74654995		91.00000000	0.37736264	2.98924889	1.966893
92	0.60931700	7.46963450	4.55137528		92.00000000	0.37326087	2.78812227	1.988367
93	0.61914092	6.87131360	4.25431142		93.00000000	0.36924731	2.53721408	2.009875
94	0.62922388	6.07358170	3.82164264		94.00000000	0.36531915	2.21879570	2.031261
95	0.63933736	5.02521280	3.21280628		95.00000000	0.36147368	1.81648218	2.052617
96	0.64919257	3.73412940	2.42416906		96.00000000	0.35770833	1.33572920	2.074000
97	0.65927553	2.06867810	1.36382885		97.00000000	0.35402062	0.73235470	2.095477
98	0.66895437	0.10432325	0.06978749		98.00000000	0.35040816	0.03655572	2.116861
99	0.67908943	-2.33114740	-1.58305756		99.00000000	0.34686869	-0.80860204	2.138223
100	0.68878239	-5.11300180	-3.52174560		100.00000000	0.34340000	-1.75580482	2.159596
101	0.69900453	-8.47841170	-5.92644819		101.00000000	0.34000000	-2.88265998	2.181079
