# Supplementary material for: Study on the Electrical Injection Regeneration of Industrialized B-Doped Czochralski Silicon PERC Solar Cells
Source: Hindawi journal article supplement (doi:10.1155/2019/5357370), 2019-06-20
Supplement: f1 [file 5357370.f1.zip › section3.3/IVRawData_3-14-10h.csv]

07:51 04/04/2018
Test Lot:	JK-PERC
Recipe:	Recipe_YJX-LID
Cell Name:	3-14-10h
Test Order:	2
Test Condition:	Light
1	-0.29999715	9.07997890	-2.72396779		1.00000000	34.34000000	311.80647543	0.000000
2	-0.29014894	9.10209180	-2.64096229		2.00000000	17.17000000	156.28291621	0.061821
3	-0.27997771	9.10017400	-2.54784588		3.00000000	11.44666667	104.16665839	0.083249
4	-0.27018681	9.10501380	-2.46005463		4.00000000	8.58500000	78.16654347	0.104600
5	-0.26000589	9.09651090	-2.36514641		5.00000000	6.86800000	62.47483686	0.126088
6	-0.24989942	9.09108160	-2.27185602		6.00000000	5.72333333	52.03129036	0.147468
7	-0.24006385	9.11832810	-2.18898095		7.00000000	4.90571429	44.73191242	0.168843
8	-0.22986062	9.10042290	-2.09182885		8.00000000	4.29250000	39.06356530	0.190336
9	-0.22007269	9.08629890	-1.99964624		9.00000000	3.81555556	34.66927825	0.211708
10	-0.20993941	9.11091520	-1.91274016		10.00000000	3.43400000	31.28688280	0.233059
11	-0.20013957	9.09744170	-1.82075807		11.00000000	3.12181818	28.40055891	0.254432
12	-0.18993559	9.09850690	-1.72813028		12.00000000	2.86166667	26.03689391	0.275911
13	-0.18018116	9.10409930	-1.64038717		13.00000000	2.64153846	24.04882846	0.297309
14	-0.16998833	9.09817310	-1.54658325		14.00000000	2.45285714	22.31651888	0.318650
15	-0.16022794	9.11124710	-1.45987635		15.00000000	2.28933333	20.85868169	0.340037
16	-0.15004332	9.10461620	-1.36608684		16.00000000	2.14625000	19.54078252	0.361516
17	-0.13994652	9.11377720	-1.27544140		17.00000000	2.02000000	18.40982994	0.382888
18	-0.13012286	9.10013390	-1.18413545		18.00000000	1.90777778	17.36103323	0.404241
19	-0.11995907	9.09326170	-1.09081922		19.00000000	1.80736842	16.43487404	0.425660
20	-0.11015923	9.09647370	-1.00206054		20.00000000	1.71700000	15.61864534	0.447147
21	-0.10000586	9.09899040	-0.90995236		21.00000000	1.63523810	14.87901573	0.468530
22	-0.09023951	9.09363560	-0.82060522		22.00000000	1.56090909	14.19433848	0.489885
23	-0.07999609	9.10597130	-0.72844207		23.00000000	1.49304348	13.59561106	0.511260
24	-0.07019848	9.10518740	-0.63917035		24.00000000	1.43083333	13.02800564	0.532753
25	-0.06004586	9.08248040	-0.54536532		25.00000000	1.37360000	12.47569508	0.554141
26	-0.04984560	9.12171750	-0.45467747		26.00000000	1.32076923	12.04768381	0.575484
27	-0.04006511	9.08703330	-0.36407299		27.00000000	1.27185185	11.55736013	0.596858
28	-0.02992886	9.11763380	-0.27288038		28.00000000	1.22642857	11.18212660	0.618338
29	-0.02008734	9.10066800	-0.18280822		29.00000000	1.18413793	10.77644618	0.639721
30	-0.00997788	9.09780220	-0.09077681		30.00000000	1.14466667	10.41395092	0.661099
31	-0.00073402	9.09252070	-0.00667406		31.00000000	1.10774194	10.07216648	0.682570
32	0.00947943	9.11220170	0.08637849		32.00000000	1.07312500	9.77853145	0.704046
33	0.01928941	9.09529590	0.17544291		33.00000000	1.04060606	9.46462004	0.725431
34	0.02940677	9.11837670	0.26814196		34.00000000	1.01000000	9.20956047	0.746807
35	0.03922047	9.09235860	0.35660655		35.00000000	0.98114286	8.92090269	0.768164
36	0.04938099	9.09415440	0.44907833		36.00000000	0.95388889	8.67481284	0.789641
37	0.05920957	9.09924130	0.53876220		37.00000000	0.92810811	8.44507963	0.811008
38	0.06936935	9.10353180	0.63150611		38.00000000	0.90368421	8.22671795	0.832382
39	0.07947183	9.10580640	0.72365507		39.00000000	0.88051282	8.01777928	0.853869
40	0.08929817	9.11141400	0.81363263		40.00000000	0.85850000	7.82214892	0.875233
41	0.09944902	9.09977340	0.90496358		41.00000000	0.83756098	7.62161509	0.896603
42	0.10925975	9.08820820	0.99297536		42.00000000	0.81761905	7.43069213	0.917974
43	0.11945153	9.10834310	1.08800552		43.00000000	0.79860465	7.27396516	0.939448
44	0.12925480	9.09729000	1.17586840		44.00000000	0.78045455	7.10002133	0.960838
45	0.13935952	9.09305950	1.26720441		45.00000000	0.76311111	6.93901474	0.982181
46	0.14923349	9.10196970	1.35831870		46.00000000	0.74652174	6.79481825	1.003545
47	0.15938509	9.10348990	1.45096056		47.00000000	0.73063830	6.65135837	1.025040
48	0.16951510	9.09201620	1.54123404		48.00000000	0.71541667	6.50457992	1.046425
49	0.17927596	9.10275550	1.63190523		49.00000000	0.70081633	6.37935967	1.067769
50	0.18948634	9.09144590	1.72270481		50.00000000	0.68680000	6.24400504	1.089153
51	0.19923156	9.10391430	1.81378705		51.00000000	0.67333333	6.12996896	1.110623
52	0.20936529	9.09884740	1.90498282		52.00000000	0.66038462	6.00873884	1.132002
53	0.21923035	9.08706190	1.99215976		53.00000000	0.64792453	5.88773030	1.153372
54	0.22936557	9.09740540	2.08663158		54.00000000	0.63592593	5.78527595	1.174746
55	0.23922691	9.09232040	2.17512771		55.00000000	0.62436364	5.67691423	1.196286
56	0.24939041	9.09966180	2.26936839		56.00000000	0.61321429	5.58004261	1.217661
57	0.25950554	9.10261920	2.36218011		57.00000000	0.60245614	5.48392883	1.239009
58	0.26932445	9.09995840	2.45084129		58.00000000	0.59206897	5.38780296	1.260393
59	0.27944550	9.09641080	2.54195106		59.00000000	0.58203390	5.29441944	1.281868
60	0.28928602	9.08658410	2.62862175		60.00000000	0.57233333	5.20055497	1.303245
61	0.29937509	9.10278610	2.72514741		61.00000000	0.56295082	5.12442090	1.324624
62	0.30924833	9.09358500	2.81217597		62.00000000	0.55387097	5.03667272	1.345981
63	0.31940067	9.09605030	2.90528456		63.00000000	0.54507937	4.95806932	1.367447
64	0.32921734	9.08956620	2.99244281		64.00000000	0.53656250	4.87712036	1.388836
65	0.33936670	9.10444640	3.08974593		65.00000000	0.52830769	4.80994907	1.410220
66	0.34919527	9.08402440	3.17209835		66.00000000	0.52030303	4.72644542	1.431562
67	0.35933793	9.10911560	3.27325074		67.00000000	0.51253731	4.66876164	1.453037
68	0.36950442	9.08068280	3.35535243		68.00000000	0.50500000	4.58574481	1.474406
69	0.37933746	9.09925080	3.45168669		69.00000000	0.49768116	4.52852569	1.495776
70	0.38949278	9.08879570	3.54002030		70.00000000	0.49057143	4.45870349	1.517279
71	0.39930722	9.08579160	3.62802219		71.00000000	0.48366197	4.39445188	1.538656
72	0.40945956	9.08773900	3.72106161		72.00000000	0.47694444	4.33434663	1.560021
73	0.41927996	9.09667780	3.81405470		73.00000000	0.47041096	4.27917693	1.581394
74	0.42942858	9.08947280	3.90327940		74.00000000	0.46405405	4.21800670	1.602867
75	0.43923035	9.09528260	3.99492416		75.00000000	0.45786667	4.16442673	1.624288
76	0.44942364	9.08859350	4.08462877		76.00000000	0.45184211	4.10660922	1.645642
77	0.45954695	9.07913780	4.17229008		77.00000000	0.44597403	4.04905964	1.667012
78	0.46938893	9.07685470	4.26057512		78.00000000	0.44025641	3.99614347	1.688492
79	0.47953531	9.06802270	4.34843708		79.00000000	0.43468354	3.94172025	1.709868
80	0.48933116	9.05799290	4.43235817		80.00000000	0.42925000	3.88814345	1.731214
81	0.49945521	9.04704380	4.51859316		81.00000000	0.42395062	3.83549980	1.752588
82	0.50930315	9.03729060	4.60272057		82.00000000	0.41878049	3.78464097	1.774070
83	0.51940930	9.01171970	4.68077102		83.00000000	0.41373494	3.72846331	1.795446
84	0.52924460	8.97589110	4.75044189		84.00000000	0.40880952	3.66942977	1.816805
85	0.53935003	8.93586250	4.81955771		85.00000000	0.40400000	3.61008845	1.838181
86	0.54949123	8.86400410	4.87069252		86.00000000	0.39930233	3.53941745	1.859652
87	0.55932128	8.78454020	4.91338027		87.00000000	0.39471264	3.46736909	1.881021
88	0.56949818	8.65649890	4.92986037		88.00000000	0.39022727	3.37800196	1.902369
89	0.57925016	8.47970770	4.91187204		89.00000000	0.38584270	3.27183329	1.923743
90	0.58941960	8.23481180	4.85375948		90.00000000	0.38155556	3.14203819	1.945221
91	0.59922361	7.90360930	4.73602930		91.00000000	0.37736264	2.98252685	1.966585
92	0.60928738	7.44592140	4.53670594		92.00000000	0.37326087	2.77927110	1.988068
93	0.61913532	6.84897180	4.24044035		93.00000000	0.36924731	2.52896443	2.009459
94	0.62923479	6.03954600	3.80029246		94.00000000	0.36531915	2.20636180	2.030944
95	0.63933206	4.98164840	3.18492753		95.00000000	0.36147368	1.80073480	2.052388
96	0.64915991	3.69866300	2.40102374		96.00000000	0.35770833	1.32304258	2.073780
97	0.65926683	2.03828170	1.34377152		97.00000000	0.35402062	0.72159375	2.095139
98	0.66895628	0.09164283	0.06130505		98.00000000	0.35040816	0.03211240	2.116620
99	0.67908180	-2.29243640	-1.55675184		99.00000000	0.34686869	-0.79517440	2.137996
100	0.68878984	-5.01986980	-3.45763532		100.00000000	0.34340000	-1.72382329	2.159384
101	0.69901508	-8.31606480	-5.81305470		101.00000000	0.34000000	-2.82746203	2.180869
07:51 04/04/2018
Test Lot:	JK-PERC
Recipe:	Recipe_YJX-LID
Cell Name:	3-14-10h
Test Order:	3
Test Condition:	Light
1	-0.29997733	9.10432150	-2.73109006		1.00000000	34.34000000	312.64240031	0.000000
2	-0.29015836	9.09337330	-2.63851828		2.00000000	17.17000000	156.13321956	0.061802
3	-0.27999628	9.11121560	-2.55110647		3.00000000	11.44666667	104.29304790	0.083223
4	-0.27011701	9.10107040	-2.45835392		4.00000000	8.58500000	78.13268938	0.104707
5	-0.26002860	9.08934020	-2.36348841		5.00000000	6.86800000	62.42558849	0.126090
6	-0.24982335	9.09417630	-2.27193759		6.00000000	5.72333333	52.04900236	0.147474
7	-0.24001628	9.10991760	-2.18652853		7.00000000	4.90571429	44.69065291	0.168825
8	-0.22990182	9.08388420	-2.08840151		8.00000000	4.29250000	38.99257293	0.190315
9	-0.22012006	9.11087700	-2.00548679		9.00000000	3.81555556	34.76305735	0.211747
10	-0.20996764	9.09614750	-1.90989662		10.00000000	3.43400000	31.23617052	0.233142
11	-0.20009954	9.10527320	-1.82196098		11.00000000	3.12181818	28.42500743	0.254572
12	-0.18991365	9.09512900	-1.72728915		12.00000000	2.86166667	26.02722749	0.276050
13	-0.18014155	9.10882570	-1.64087798		13.00000000	2.64153846	24.06131343	0.297421
14	-0.16995715	9.09863090	-1.54637738		14.00000000	2.45285714	22.31764179	0.318837
15	-0.16017611	9.09588340	-1.45694322		15.00000000	2.28933333	20.82350906	0.340197
16	-0.15005422	9.11760430	-1.36813500		16.00000000	2.14625000	19.56865823	0.361682
17	-0.13989958	9.08195970	-1.27056235		17.00000000	2.02000000	18.34555859	0.383073
18	-0.13008209	9.11379910	-1.18554203		18.00000000	1.90777778	17.38710339	0.404436
19	-0.11987013	9.09214400	-1.08987648		19.00000000	1.80736842	16.43285395	0.425820
20	-0.11010623	9.10337350	-1.00233814		20.00000000	1.71700000	15.63049230	0.447303
21	-0.09993968	9.09991070	-0.90944218		21.00000000	1.63523810	14.88052064	0.468664
22	-0.09012963	9.10817050	-0.82091603		22.00000000	1.56090909	14.21702614	0.490065
23	-0.07998913	9.09590340	-0.72757338		23.00000000	1.49304348	13.58057925	0.511407
24	-0.07015750	9.10420130	-0.63872798		24.00000000	1.43083333	13.02659469	0.532884
25	-0.06000881	9.08877560	-0.54540660		25.00000000	1.37360000	12.48434216	0.554276
26	-0.04985045	9.10328870	-0.45380299		26.00000000	1.32076923	12.02334361	0.575665
27	-0.04007314	9.09910770	-0.36462983		27.00000000	1.27185185	11.57271698	0.597149
28	-0.02989989	9.09979060	-0.27208277		28.00000000	1.22642857	11.16024319	0.618543
29	-0.02007198	9.09993080	-0.18265364		29.00000000	1.18413793	10.77557323	0.639884
30	-0.00994711	9.09585670	-0.09047749		30.00000000	1.14466667	10.41172397	0.661254
31	-0.00072056	9.09929180	-0.00655656		31.00000000	1.10774194	10.07966711	0.682861
32	0.00950905	9.10188200	0.08655021		32.00000000	1.07312500	9.76745712	0.704247
33	0.01924291	9.09543990	0.17502269		33.00000000	1.04060606	9.46476988	0.725597
34	0.02941214	9.10218240	0.26771467		34.00000000	1.01000000	9.19320422	0.746980
35	0.03926582	9.10450550	0.35749590		35.00000000	0.98114286	8.93282054	0.768464
36	0.04938594	9.09574030	0.44920168		36.00000000	0.95388889	8.67632561	0.789858
37	0.05922250	9.09911820	0.53887256		37.00000000	0.92810811	8.44496538	0.811222
38	0.06930839	9.08992770	0.63000821		38.00000000	0.90368421	8.21442414	0.832600
39	0.07950665	9.09711550	0.72328119		39.00000000	0.88051282	8.01012683	0.854080
40	0.08926804	9.09914110	0.81226253		40.00000000	0.85850000	7.81161263	0.875445
41	0.09952882	9.09385780	0.90510093		41.00000000	0.83756098	7.61666041	0.896787
42	0.10938548	9.10158440	0.99558118		42.00000000	0.81761905	7.44162877	0.918164
43	0.11948327	9.08975700	1.08607389		43.00000000	0.79860465	7.25912222	0.939654
44	0.12924764	9.09768770	1.17585466		44.00000000	0.78045455	7.10033172	0.961034
45	0.13945261	9.09919830	1.26890695		45.00000000	0.76311111	6.94369932	0.982387
46	0.14929958	9.08747580	1.35675632		46.00000000	0.74652174	6.78399824	1.003757
47	0.15935123	9.09856030	1.44986678		47.00000000	0.73063830	6.64775661	1.025227
48	0.16954353	9.09184840	1.54146407		48.00000000	0.71541667	6.50445988	1.046610
49	0.17934066	9.10037990	1.63206814		49.00000000	0.70081633	6.37769481	1.067988
50	0.18950990	9.10227200	1.72497066		50.00000000	0.68680000	6.25144041	1.089350
51	0.19932786	9.10008620	1.81390071		51.00000000	0.67333333	6.12739137	1.110832
52	0.20940481	9.09040640	1.90357483		52.00000000	0.66038462	6.00316453	1.132202
53	0.21928379	9.09625910	1.99466217		53.00000000	0.64792453	5.89368939	1.153594
54	0.22938158	9.09811500	2.08693999		54.00000000	0.63592593	5.78572721	1.174942
55	0.23923749	9.08848190	2.17430560		55.00000000	0.62436364	5.67451761	1.196417
56	0.24935091	9.08661460	2.26575562		56.00000000	0.61321429	5.57204188	1.217806
57	0.25955439	9.10260960	2.36262228		57.00000000	0.60245614	5.48392305	1.239193
58	0.26936340	9.09577850	2.45006982		58.00000000	0.59206897	5.38532817	1.260676
59	0.27951330	9.09414100	2.54193336		59.00000000	0.58203390	5.29309834	1.282065
60	0.28929552	9.08558850	2.62842005		60.00000000	0.57233333	5.19998515	1.303430
61	0.29949528	9.10384750	2.72655936		61.00000000	0.56295082	5.12501841	1.324811
62	0.30926934	9.10550500	2.81605352		62.00000000	0.55387097	5.04327487	1.346297
63	0.31942815	9.08349510	2.90152404		63.00000000	0.54507937	4.95122574	1.367681
64	0.32923272	9.09951020	2.99585649		64.00000000	0.53656250	4.88245594	1.389042
65	0.33944362	9.09875390	3.08851396		65.00000000	0.52830769	4.80694168	1.410423
66	0.34919164	9.09318830	3.17526534		66.00000000	0.52030303	4.73121343	1.431898
67	0.35935864	9.08882620	3.26614822		67.00000000	0.51253731	4.65836256	1.453298
68	0.36953381	9.08696650	3.35794135		68.00000000	0.50500000	4.58891808	1.474654
69	0.37930042	9.09704880	3.45051443		69.00000000	0.49768116	4.52742979	1.496029
70	0.38946667	9.08358570	3.53775387		70.00000000	0.49057143	4.45614761	1.517518
71	0.39933226	9.09270480	3.63101036		71.00000000	0.48366197	4.39779553	1.538899
72	0.40949184	9.08717730	3.72112495		72.00000000	0.47694444	4.33407873	1.560256
73	0.41932690	9.08980750	3.81160080		73.00000000	0.47041096	4.27594506	1.581640
74	0.42939791	9.08633610	3.90165373		74.00000000	0.46405405	4.21655110	1.603135
75	0.43925604	9.08980560	3.99275201		75.00000000	0.45786667	4.16191899	1.624511
76	0.44942677	9.07741070	4.07963137		76.00000000	0.45184211	4.10155636	1.645871
77	0.45956773	9.08106520	4.17336452		77.00000000	0.44597403	4.04991921	1.667244
78	0.46939462	9.06445120	4.25480463		78.00000000	0.44025641	3.99068275	1.688723
79	0.47956461	9.06963540	4.34947616		79.00000000	0.43468354	3.94242126	1.710103
80	0.48937437	9.06248570	4.43494823		80.00000000	0.42925000	3.89007199	1.731459
81	0.49940816	9.03894040	4.51412059		81.00000000	0.42395062	3.83206436	1.752836
82	0.50929087	9.04069140	4.60434159		82.00000000	0.41878049	3.78606515	1.774310
83	0.51947719	9.00679400	4.67882404		83.00000000	0.41373494	3.72642537	1.795684
84	0.52922374	8.98260020	4.75380527		84.00000000	0.40880952	3.67217251	1.817086
85	0.53950161	8.93069360	4.81812358		85.00000000	0.40400000	3.60800021	1.838422
86	0.54951161	8.87462230	4.87670799		86.00000000	0.39930233	3.54365732	1.859898
87	0.55938166	8.77881340	4.91070721		87.00000000	0.39471264	3.46510865	1.881288
88	0.56951439	8.65338520	4.92822739		88.00000000	0.39022727	3.37678691	1.902672
89	0.57934803	8.47858240	4.91205001		89.00000000	0.38584270	3.27139910	1.924164
90	0.58937138	8.24125480	4.85715971		90.00000000	0.38155556	3.14449655	1.945566
91	0.59922355	7.90317630	4.73576936		91.00000000	0.37736264	2.98236345	1.966932
92	0.60940319	7.45914510	4.54562682		92.00000000	0.37326087	2.78420699	1.988405
93	0.61912817	6.85022450	4.24116696		93.00000000	0.36924731	2.52942698	2.009909
94	0.62928772	6.03492830	3.79770627		94.00000000	0.36531915	2.20467487	2.031295
95	0.63937879	4.98968940	3.19030157		95.00000000	0.36147368	1.80364141	2.052657
96	0.64916253	3.70114420	2.40264413		96.00000000	0.35770833	1.32393012	2.074032
97	0.65935034	2.03859950	1.34415127		97.00000000	0.35402062	0.72170626	2.095519
98	0.66895396	0.08661189	0.05793937		98.00000000	0.35040816	0.03034951	2.116903
99	0.67908376	-2.32651210	-1.57989658		99.00000000	0.34686869	-0.80699420	2.138252
100	0.68879455	-5.06533150	-3.48897273		100.00000000	0.34340000	-1.73943484	2.159630
101	0.69896454	-8.37643810	-5.85483320		101.00000000	0.34000000	-2.84798895	2.181118
07:51 04/04/2018
Test Lot:	JK-PERC
Recipe:	Recipe_YJX-LID
Cell Name:	3-14-10h
Test Order:	4
Test Condition:	Light
1	-0.29986304	9.09713840	-2.72789558		1.00000000	34.34000000	312.39573266	0.000000
2	-0.29004174	9.09480380	-2.63787272		2.00000000	17.17000000	156.15778125	0.061795
3	-0.27993464	9.09315300	-2.54548851		3.00000000	11.44666667	104.08629134	0.083229
4	-0.27012524	9.09834670	-2.45769309		4.00000000	8.58500000	78.10930642	0.104724
5	-0.25988939	9.10607050	-2.36657111		5.00000000	6.86800000	62.54049219	0.126120
6	-0.24980538	9.10640430	-2.27482879		6.00000000	5.72333333	52.11898728	0.147473
7	-0.23996770	9.09952830	-2.18359288		7.00000000	4.90571429	44.63968597	0.168843
8	-0.22977354	9.09470370	-2.08972226		8.00000000	4.29250000	39.03901563	0.190327
9	-0.22001550	9.10645580	-2.00356143		9.00000000	3.81555556	34.74618802	0.211707
10	-0.20988160	9.10128400	-1.91019205		10.00000000	3.43400000	31.25380926	0.233047
11	-0.20001639	9.10929970	-1.82200924		11.00000000	3.12181818	28.43757743	0.254416
12	-0.18984382	9.10565190	-1.72865174		12.00000000	2.86166667	26.05734052	0.275898
13	-0.18006122	9.09782120	-1.63816478		13.00000000	2.64153846	24.03224462	0.297278
14	-0.16995859	9.09136100	-1.54515490		14.00000000	2.45285714	22.29980977	0.318628
15	-0.16006584	9.10235880	-1.45697671		15.00000000	2.28933333	20.83833341	0.340004
16	-0.14995502	9.09025570	-1.36312948		16.00000000	2.14625000	19.50996130	0.361480
17	-0.13978541	9.09256080	-1.27100734		17.00000000	2.02000000	18.36697282	0.382868
18	-0.12996858	9.10790630	-1.18374165		18.00000000	1.90777778	17.37586124	0.404271
19	-0.11984735	9.09364890	-1.08984972		19.00000000	1.80736842	16.43557385	0.425630
20	-0.11004391	9.09917640	-1.00130895		20.00000000	1.71700000	15.62328588	0.447105
21	-0.09986462	9.10405640	-0.90917317		21.00000000	1.63523810	14.88729985	0.468479
22	-0.09006119	9.11020950	-0.82047629		22.00000000	1.56090909	14.22020883	0.489860
23	-0.07993921	9.08780770	-0.72647216		23.00000000	1.49304348	13.56849202	0.511225
24	-0.07008144	9.10199360	-0.63788085		24.00000000	1.43083333	13.02343584	0.532692
25	-0.05991332	9.10185620	-0.54532244		25.00000000	1.37360000	12.50230968	0.554048
26	-0.04978613	9.09420110	-0.45276510		26.00000000	1.32076923	12.01134099	0.575431
27	-0.04000428	9.08855720	-0.36358118		27.00000000	1.27185185	11.55929831	0.596908
28	-0.02975429	9.09478860	-0.27060896		28.00000000	1.22642857	11.15410859	0.618300
29	-0.01999030	9.09895420	-0.18189083		29.00000000	1.18413793	10.77441680	0.639651
30	-0.00983929	9.10149770	-0.08955232		30.00000000	1.14466667	10.41818103	0.661018
31	-0.00060001	9.08649730	-0.00545200		31.00000000	1.10774194	10.06549411	0.682618
32	0.00954334	9.09545800	0.08680107		32.00000000	1.07312500	9.76056337	0.703998
33	0.01936213	9.09384730	0.17607623		33.00000000	1.04060606	9.46311261	0.725358
34	0.02952103	9.09833340	0.26859216		34.00000000	1.01000000	9.18931673	0.746739
35	0.03935396	9.09909920	0.35808555		35.00000000	0.98114286	8.92751619	0.768229
36	0.04947862	9.09990020	0.45025054		36.00000000	0.95388889	8.68029369	0.789608
37	0.05928029	9.09701350	0.53927357		37.00000000	0.92810811	8.44301199	0.810968
38	0.06947417	9.08380220	0.63108960		38.00000000	0.90368421	8.20888862	0.832345
39	0.07964499	9.12082860	0.72642826		39.00000000	0.88051282	8.03100652	0.853830
40	0.08948982	9.09344860	0.81377106		40.00000000	0.85850000	7.80672562	0.875222
41	0.09961746	9.09586330	0.90610679		41.00000000	0.83756098	7.61834014	0.896560
42	0.10941094	9.09816840	0.99543916		42.00000000	0.81761905	7.43883578	0.917938
43	0.11956463	9.09530260	1.08747649		43.00000000	0.79860465	7.26355096	0.939419
44	0.12936555	9.10455700	1.17781602		44.00000000	0.78045455	7.10569290	0.960791
45	0.13954233	9.08802320	1.26816393		45.00000000	0.76311111	6.93517148	0.982150
46	0.14932241	9.09640880	1.35829768		46.00000000	0.74652174	6.79066692	1.003525
47	0.15952373	9.09136100	1.45028782		47.00000000	0.73063830	6.64249653	1.024996
48	0.16959928	9.11745070	1.54631307		48.00000000	0.71541667	6.52277619	1.046377
49	0.17943816	9.09008410	1.63110797		49.00000000	0.70081633	6.37047935	1.067732
50	0.18958440	9.08799270	1.72294164		50.00000000	0.68680000	6.24163339	1.089101
51	0.19943295	9.08772560	1.81239193		51.00000000	0.67333333	6.11906857	1.110572
52	0.20948915	9.10450840	1.90729573		52.00000000	0.66038462	6.01247728	1.131942
53	0.21930124	9.10106180	1.99587414		53.00000000	0.64792453	5.89680117	1.153328
54	0.22956881	9.10354040	2.08988894		54.00000000	0.63592593	5.78917736	1.174685
55	0.23928934	9.09105210	2.17539186		55.00000000	0.62436364	5.67612235	1.196157
56	0.24949440	9.10815810	2.27243444		56.00000000	0.61321429	5.58525266	1.217534
57	0.25956398	9.09072690	2.35962526		57.00000000	0.60245614	5.47676424	1.238917
58	0.26945570	9.09857370	2.45166255		58.00000000	0.59206897	5.38698312	1.260400
59	0.27960345	9.09879590	2.54405472		59.00000000	0.58203390	5.29580765	1.281795
60	0.28936642	9.09761910	2.63254547		60.00000000	0.57233333	5.20687066	1.303144
61	0.29948291	9.08095550	2.71959098		61.00000000	0.56295082	5.11213134	1.324517
62	0.30937165	9.09478190	2.81366768		62.00000000	0.55387097	5.03733565	1.345994
63	0.31946355	9.09166810	2.90445657		63.00000000	0.54507937	4.95568068	1.367363
64	0.32933146	9.09012890	2.99366542		64.00000000	0.53656250	4.87742229	1.388720
65	0.33949929	9.08889580	3.08567367		65.00000000	0.52830769	4.80173357	1.410107
66	0.34932256	9.09659770	3.17764680		66.00000000	0.52030303	4.73298735	1.431587
67	0.35948667	9.09043600	3.26789057		67.00000000	0.51253731	4.65918765	1.452963
68	0.36958379	9.09958170	3.36305789		68.00000000	0.50500000	4.59528876	1.474330
69	0.37950230	9.08688640	3.44849429		69.00000000	0.49768116	4.52237216	1.495698
70	0.38960689	9.09745220	3.54443006		70.00000000	0.49057143	4.46295012	1.517180
71	0.39939588	9.09275440	3.63160865		71.00000000	0.48366197	4.39781952	1.538543
72	0.40958309	9.08547120	3.72125537		72.00000000	0.47694444	4.33326501	1.559884
73	0.41936764	9.10121540	3.81675522		73.00000000	0.47041096	4.28131146	1.581265
74	0.42945582	9.08367250	3.90103602		74.00000000	0.46405405	4.21531505	1.602740
75	0.43935126	9.07702160	3.98800088		75.00000000	0.45786667	4.15606562	1.624122
76	0.44961512	9.08054830	4.08275181		76.00000000	0.45184211	4.10297406	1.645481
77	0.45970035	9.07949640	4.17384767		77.00000000	0.44597403	4.04921956	1.666853
78	0.46948341	9.07829860	4.26211058		78.00000000	0.44025641	3.99677915	1.688341
79	0.47966462	9.07168770	4.35136763		79.00000000	0.43468354	3.94331336	1.709732
80	0.48947075	9.05671790	4.43299850		80.00000000	0.42925000	3.88759616	1.731088
81	0.49959171	9.04638100	4.51949695		81.00000000	0.42395062	3.83521881	1.752456
82	0.50946259	9.04271890	4.60692699		82.00000000	0.41878049	3.78691423	1.773944
83	0.51958799	9.00731180	4.68009103		83.00000000	0.41373494	3.72663960	1.795319
84	0.52931601	8.96845340	4.74714597		84.00000000	0.40880952	3.66638916	1.816712
85	0.53947490	8.92971990	4.81735975		85.00000000	0.40400000	3.60760684	1.838045
86	0.54962039	8.86038880	4.86985035		86.00000000	0.39930233	3.53797385	1.859516
87	0.55945259	8.77680110	4.91020411		87.00000000	0.39471264	3.46431437	1.880904
88	0.56956238	8.65402890	4.92900930		88.00000000	0.39022727	3.37703810	1.902285
89	0.57937372	8.48028470	4.91325409		89.00000000	0.38584270	3.27205592	1.923756
90	0.58952218	8.23526290	4.85487014		90.00000000	0.38155556	3.14221031	1.945131
91	0.59932983	7.91204880	4.74192686		91.00000000	0.37736264	2.98571160	1.966473
92	0.60940683	7.44739870	4.53849563		92.00000000	0.37326087	2.77982251	1.987943
93	0.61922634	6.85452460	4.24450218		93.00000000	0.36924731	2.53101478	2.009456
94	0.62932128	6.04714680	3.80559816		94.00000000	0.36531915	2.20913852	2.030880
95	0.63945860	5.00003290	3.19731404		95.00000000	0.36147368	1.80738031	2.052242
96	0.64924610	3.69966580	2.40199359		96.00000000	0.35770833	1.32340129	2.073636
97	0.65936780	2.03085090	1.33907769		97.00000000	0.35402062	0.71896309	2.095112
98	0.66905111	0.07872829	0.05267325		98.00000000	0.35040816	0.02758703	2.116489
99	0.67914677	-2.34199070	-1.59055542		99.00000000	0.34686869	-0.81236324	2.137846
100	0.68886507	-5.09624530	-3.51062538		100.00000000	0.34340000	-1.75005064	2.159220
101	0.69909543	-8.43029020	-5.89357735		101.00000000	0.34000000	-2.86629867	2.180696
