# Supplementary material for: Study on the Electrical Injection Regeneration of Industrialized B-Doped Czochralski Silicon PERC Solar Cells
Source: Hindawi journal article supplement (doi:10.1155/2019/5357370), 2019-06-20
Supplement: f1 [file 5357370.f1.zip › section3.3/IVRawData_3-14-11h.csv]

08:52 04/04/2018
Test Lot:	JK-PERC
Recipe:	Recipe_YJX-LID
Cell Name:	3-14-11h
Test Order:	2
Test Condition:	Light
1	-0.29998541	9.07987210	-2.72382915		1.00000000	34.34000000	311.80280791	0.000000
2	-0.29018068	9.07586380	-2.63364033		2.00000000	17.17000000	155.83258145	0.061805
3	-0.28003362	9.09368420	-2.54653731		3.00000000	11.44666667	104.09237181	0.083227
4	-0.27022368	9.09229950	-2.45695463		4.00000000	8.58500000	78.05739121	0.104702
5	-0.26004982	9.07723520	-2.36053338		5.00000000	6.86800000	62.34245135	0.126079
6	-0.24990648	9.08599090	-2.27064800		6.00000000	5.72333333	52.00215458	0.147422
7	-0.24009953	9.08106040	-2.18035833		7.00000000	4.90571429	44.54908773	0.168850
8	-0.22994353	9.07209680	-2.08606996		8.00000000	4.29250000	38.94197551	0.190347
9	-0.22010979	9.09840390	-2.00264777		9.00000000	3.81555556	34.71546555	0.211726
10	-0.20997760	9.07481380	-1.90550762		10.00000000	3.43400000	31.16291059	0.233107
11	-0.20014460	9.08402160	-1.81811787		11.00000000	3.12181818	28.35866379	0.254478
12	-0.18999456	9.08846570	-1.72675904		12.00000000	2.86166667	26.00815934	0.275948
13	-0.18023151	9.08004280	-1.63650982		13.00000000	2.64153846	23.98528229	0.297334
14	-0.17007329	9.08957390	-1.54589374		14.00000000	2.45285714	22.29542627	0.318723
15	-0.16023284	9.07829190	-1.45464049		15.00000000	2.28933333	20.78323626	0.340070
16	-0.15010586	9.09001640	-1.36446473		16.00000000	2.14625000	19.50944770	0.361548
17	-0.13993275	9.07891080	-1.27043696		17.00000000	2.02000000	18.33939982	0.382915
18	-0.13011836	9.09354780	-1.18323753		18.00000000	1.90777778	17.34846841	0.404292
19	-0.11997278	9.07587530	-1.08885799		19.00000000	1.80736842	16.40345041	0.425791
20	-0.11015243	9.08406160	-1.00063146		20.00000000	1.71700000	15.59733377	0.447162
21	-0.10000983	9.07739540	-0.90782877		21.00000000	1.63523810	14.84370276	0.468518
22	-0.09020065	9.08137130	-0.81914558		22.00000000	1.56090909	14.17519502	0.489892
23	-0.08002083	9.08586880	-0.72705876		23.00000000	1.49304348	13.56559716	0.511373
24	-0.07019454	9.07652950	-0.63712277		24.00000000	1.43083333	12.98700096	0.532761
25	-0.06006607	9.07012460	-0.54480671		25.00000000	1.37360000	12.45872315	0.554101
26	-0.04993761	9.09229280	-0.45404734		26.00000000	1.32076923	12.00882057	0.575473
27	-0.04008005	9.08283810	-0.36404059		27.00000000	1.27185185	11.55202446	0.596954
28	-0.02993372	9.08376410	-0.27191086		28.00000000	1.22642857	11.14058783	0.618346
29	-0.02012752	9.07606030	-0.18267855		29.00000000	1.18413793	10.74730727	0.639693
30	-0.00998640	9.08409790	-0.09071744		30.00000000	1.14466667	10.39826406	0.661068
31	-0.00072647	9.07977580	-0.00659622		31.00000000	1.10774194	10.05804842	0.682668
32	0.00943230	9.07223030	0.08557198		32.00000000	1.07312500	9.73563714	0.704043
33	0.01923004	9.08868410	0.17477572		33.00000000	1.04060606	9.45773976	0.725393
34	0.02940287	9.07414820	0.26680595		34.00000000	1.01000000	9.16488968	0.746766
35	0.03919465	9.08764270	0.35618698		35.00000000	0.98114286	8.91627572	0.768238
36	0.04937120	9.07092860	0.44784261		36.00000000	0.95388889	8.65265800	0.789624
37	0.05917861	9.08466720	0.53761800		37.00000000	0.92810811	8.43155329	0.810974
38	0.06932167	9.08331200	0.62967036		38.00000000	0.90368421	8.20844563	0.832350
39	0.07948557	9.07444860	0.72128775		39.00000000	0.88051282	7.99016833	0.853839
40	0.08929596	9.08716390	0.81144703		40.00000000	0.85850000	7.80133021	0.875208
41	0.09946209	9.08118060	0.90323322		41.00000000	0.83756098	7.60604248	0.896580
42	0.10927769	9.08401490	0.99268016		42.00000000	0.81761905	7.42726361	0.917950
43	0.11943415	9.08282470	1.08479945		43.00000000	0.79860465	7.25358605	0.939426
44	0.12924901	9.08956530	1.17481732		44.00000000	0.78045455	7.09399255	0.960809
45	0.13937718	9.07703880	1.26513207		45.00000000	0.76311111	6.92678916	0.982191
46	0.14918682	9.08229060	1.35495805		46.00000000	0.74652174	6.78012737	1.003557
47	0.15938942	9.08596230	1.44820626		47.00000000	0.73063830	6.63855203	1.025039
48	0.16950196	9.07584860	1.53837413		48.00000000	0.71541667	6.49301335	1.046421
49	0.17935552	9.09453200	1.63115452		49.00000000	0.70081633	6.37359651	1.067811
50	0.18949188	9.06513790	1.71777002		50.00000000	0.68680000	6.22593671	1.089297
51	0.19924571	9.08556370	1.81025959		51.00000000	0.67333333	6.11761289	1.110695
52	0.20943268	9.07769780	1.90116658		52.00000000	0.66038462	5.99477197	1.132069
53	0.21923041	9.08383940	1.99145384		53.00000000	0.64792453	5.88564236	1.153448
54	0.22938985	9.08858590	2.08482936		54.00000000	0.63592593	5.77966740	1.174932
55	0.23921587	9.08221530	2.17261003		55.00000000	0.62436364	5.67060497	1.196316
56	0.24934033	9.09428690	2.26757250		56.00000000	0.61321429	5.57674665	1.217677
57	0.25950348	9.06727030	2.35298820		57.00000000	0.60245614	5.46263267	1.239047
58	0.26934662	9.10149670	2.45145737		58.00000000	0.59206897	5.38871374	1.260537
59	0.27948150	9.06574540	2.53370812		59.00000000	0.58203390	5.27657114	1.281901
60	0.28927177	9.09313680	2.63038778		60.00000000	0.57233333	5.20430530	1.303249
61	0.29945651	9.07864090	2.71865812		61.00000000	0.56295082	5.11082834	1.324631
62	0.30924308	9.09075550	2.81125323		62.00000000	0.55387097	5.03510555	1.346102
63	0.31938913	9.07381060	2.89807647		63.00000000	0.54507937	4.94594692	1.367490
64	0.32918984	9.08594700	2.99100144		64.00000000	0.53656250	4.87517844	1.388840
65	0.33935151	9.07455540	3.07946408		65.00000000	0.52830769	4.79415742	1.410211
66	0.34916040	9.08360390	3.17163477		66.00000000	0.52030303	4.72622664	1.431699
67	0.35933101	9.08656310	3.26508390		67.00000000	0.51253731	4.65720264	1.453081
68	0.36948225	9.07116890	3.35163590		68.00000000	0.50500000	4.58094029	1.474428
69	0.37926066	9.08095550	3.44404918		69.00000000	0.49768116	4.51942046	1.495814
70	0.38946846	9.06725880	3.53141132		70.00000000	0.49057143	4.44813810	1.517293
71	0.39928183	9.07288270	3.62263721		71.00000000	0.48366197	4.38820834	1.538668
72	0.40942785	9.07819180	3.71686455		72.00000000	0.47694444	4.32979314	1.560033
73	0.41923898	9.06465050	3.80025483		73.00000000	0.47041096	4.26411093	1.581392
74	0.42939320	9.07938190	3.89862485		74.00000000	0.46405405	4.21332398	1.602863
75	0.43920806	9.06705670	3.98232438		75.00000000	0.45786667	4.15150303	1.624252
76	0.44936451	9.07498070	4.07797426		76.00000000	0.45184211	4.10045838	1.645647
77	0.45949864	9.06430340	4.16503508		77.00000000	0.44597403	4.04244388	1.667007
78	0.46936262	9.06921480	4.25675042		78.00000000	0.44025641	3.99277995	1.688488
79	0.47951910	9.05027770	4.33978102		79.00000000	0.43468354	3.93400679	1.709923
80	0.48931608	9.03984360	4.42334083		80.00000000	0.42925000	3.88035287	1.731336
81	0.49945319	9.02689270	4.50851035		81.00000000	0.42395062	3.82695673	1.752827
82	0.50928366	9.01277160	4.59005731		82.00000000	0.41878049	3.77437289	1.774203
83	0.51944160	8.98023130	4.66470571		83.00000000	0.41373494	3.71543546	1.795568
84	0.52922076	8.96654890	4.74528382		84.00000000	0.40880952	3.66561059	1.816936
85	0.53934592	8.91283130	4.80709920		85.00000000	0.40400000	3.60078385	1.838406
86	0.54949421	8.84168820	4.85845647		86.00000000	0.39930233	3.53050666	1.859798
87	0.55931425	8.76602750	4.90296410		87.00000000	0.39471264	3.46006189	1.881139
88	0.56943727	8.60563370	4.90036856		88.00000000	0.39022727	3.35815297	1.902509
89	0.57926029	8.43972110	4.88879529		89.00000000	0.38584270	3.25640475	1.924001
90	0.58937877	8.19132800	4.82779482		90.00000000	0.38155556	3.12544671	1.945372
91	0.59917873	7.84832810	4.70255126		91.00000000	0.37736264	2.96166579	1.966726
92	0.60931510	7.37337830	4.49271074		92.00000000	0.37326087	2.75219360	1.988200
93	0.61911362	6.78311780	4.19952062		93.00000000	0.36924731	2.50464801	2.009705
94	0.62921798	5.95194290	3.74506949		94.00000000	0.36531915	2.17435871	2.031091
95	0.63932157	4.89626310	3.13028661		95.00000000	0.36147368	1.76987026	2.052445
96	0.64910519	3.62243370	2.35134052		96.00000000	0.35770833	1.29577472	2.073822
97	0.65912396	1.97862520	1.30415928		97.00000000	0.35402062	0.70047412	2.095298
98	0.66893655	0.07906906	0.05289218		98.00000000	0.35040816	0.02770644	2.116674
99	0.67902827	-2.23954340	-1.52071328		99.00000000	0.34686869	-0.77682748	2.138019
100	0.68874043	-4.87210130	-3.35561314		100.00000000	0.34340000	-1.67307959	2.159399
101	0.69894749	-7.99460740	-5.58781078		101.00000000	0.34000000	-2.71816652	2.180916
08:52 04/04/2018
Test Lot:	JK-PERC
Recipe:	Recipe_YJX-LID
Cell Name:	3-14-11h
Test Order:	3
Test Condition:	Light
1	-0.29997155	9.09024520	-2.72681494		1.00000000	34.34000000	312.15902017	0.000000
2	-0.29014733	9.09136680	-2.63783580		2.00000000	17.17000000	156.09876796	0.061799
3	-0.28002393	9.07193570	-2.54035909		3.00000000	11.44666667	103.84342398	0.083240
4	-0.27017811	9.08187100	-2.45372274		4.00000000	8.58500000	77.96786254	0.104682
5	-0.25999591	9.08368300	-2.36172043		5.00000000	6.86800000	62.38673484	0.126166
6	-0.24988665	9.09366130	-2.27238456		6.00000000	5.72333333	52.04605484	0.147534
7	-0.24004529	9.08185390	-2.18005625		7.00000000	4.90571429	44.55298042	0.168931
8	-0.22991146	9.09106450	-2.09013991		8.00000000	4.29250000	39.02339437	0.190289
9	-0.22009692	9.08230970	-1.99898839		9.00000000	3.81555556	34.65405723	0.211841
10	-0.20993333	9.08768180	-1.90780730		10.00000000	3.43400000	31.20709930	0.233219
11	-0.20014928	9.08856490	-1.81906972		11.00000000	3.12181818	28.37284715	0.254581
12	-0.18995963	9.08364300	-1.72552546		12.00000000	2.86166667	25.99435839	0.275943
13	-0.18020314	9.08053590	-1.63634108		13.00000000	2.64153846	23.98658483	0.297456
14	-0.17004773	9.08708100	-1.54523750		14.00000000	2.45285714	22.28931154	0.318829
15	-0.16026369	9.07974620	-1.45515363		15.00000000	2.28933333	20.78656563	0.340231
16	-0.15007702	9.08229640	-1.36304398		16.00000000	2.14625000	19.49287865	0.361577
17	-0.13994169	9.09865470	-1.27328112		17.00000000	2.02000000	18.37928249	0.383063
18	-0.13011524	9.06868650	-1.17997432		18.00000000	1.90777778	17.30103858	0.404449
19	-0.11996206	9.10364630	-1.09209216		19.00000000	1.80736842	16.45364284	0.425829
20	-0.11013709	9.07004830	-0.99894873		20.00000000	1.71700000	15.57327293	0.447306
21	-0.10000028	9.08250140	-0.90825268		21.00000000	1.63523810	14.85205229	0.468686
22	-0.09017010	9.08012010	-0.81875534		22.00000000	1.56090909	14.17324201	0.490045
23	-0.08002213	9.08363340	-0.72689166		23.00000000	1.49304348	13.56225961	0.511409
24	-0.07021577	9.08164220	-0.63767449		24.00000000	1.43083333	12.99431638	0.532889
25	-0.06008268	9.08471300	-0.54583391		25.00000000	1.37360000	12.47876178	0.554274
26	-0.04990866	9.07909200	-0.45312529		26.00000000	1.32076923	11.99138536	0.575626
27	-0.04009337	9.08160880	-0.36411227		27.00000000	1.27185185	11.55046097	0.597014
28	-0.02993423	9.08866980	-0.27206232		28.00000000	1.22642857	11.14660432	0.618501
29	-0.02009661	9.07510660	-0.18237889		29.00000000	1.18413793	10.74617795	0.639885
30	-0.00996203	9.07637500	-0.09041914		30.00000000	1.14466667	10.38942392	0.661235
31	-0.00066177	9.08245660	-0.00601049		31.00000000	1.10774194	10.06101805	0.682718
32	0.00949642	9.07582280	0.08618779		32.00000000	1.07312500	9.73949234	0.704207
33	0.01927794	9.08481980	0.17513657		33.00000000	1.04060606	9.45371854	0.725586
34	0.02943679	9.08241460	0.26735709		34.00000000	1.01000000	9.17323875	0.746931
35	0.03926668	9.08198450	0.35661937		35.00000000	0.98114286	8.91072422	0.768314
36	0.04942627	9.07563400	0.44857476		36.00000000	0.95388889	8.65714643	0.789798
37	0.05924277	9.07485490	0.53761958		37.00000000	0.92810811	8.42244641	0.811183
38	0.06938525	9.08912850	0.63065141		38.00000000	0.90368421	8.21370191	0.832538
39	0.07953889	9.07133670	0.72152404		39.00000000	0.88051282	7.98742826	0.853910
40	0.08934199	9.08627990	0.81178634		40.00000000	0.85850000	7.80057129	0.875389
41	0.09950531	9.07803920	0.90331306		41.00000000	0.83756098	7.60341137	0.896776
42	0.10931510	9.08543210	0.99317492		42.00000000	0.81761905	7.42842234	0.918137
43	0.11947023	9.07989790	1.08477749		43.00000000	0.79860465	7.25124870	0.939506
44	0.12929119	9.08551030	1.17467644		44.00000000	0.78045455	7.09082781	0.960993
45	0.13943145	9.07899670	1.26589767		45.00000000	0.76311111	6.92828326	0.982359
46	0.14925985	9.09048560	1.35684452		46.00000000	0.74652174	6.78624512	1.003752
47	0.15940233	9.07523540	1.44661367		47.00000000	0.73063830	6.63071455	1.025091
48	0.16953661	9.09297370	1.54159194		48.00000000	0.71541667	6.50526493	1.046566
49	0.17934269	9.08124640	1.62865516		49.00000000	0.70081633	6.36428574	1.067954
50	0.18948814	9.08391380	1.72129393		50.00000000	0.68680000	6.23883200	1.089369
51	0.19925180	9.09390160	1.81197626		51.00000000	0.67333333	6.12322708	1.110861
52	0.20943074	9.07975100	1.90157897		52.00000000	0.66038462	5.99612787	1.132262
53	0.21924278	9.07496640	1.98962086		53.00000000	0.64792453	5.87989332	1.153612
54	0.22940311	9.08631990	2.08443004		54.00000000	0.63592593	5.77822640	1.174991
55	0.23924269	9.08014200	2.17235760		55.00000000	0.62436364	5.66931048	1.196467
56	0.24938144	9.08614160	2.26591508		56.00000000	0.61321429	5.57175183	1.217847
57	0.25953880	9.06726930	2.35330819		57.00000000	0.60245614	5.46263207	1.239214
58	0.26936424	9.08895210	2.44823867		58.00000000	0.59206897	5.38128647	1.260591
59	0.27949926	9.07736300	2.53711624		59.00000000	0.58203390	5.28333297	1.282076
60	0.28933957	9.08637520	2.62904789		60.00000000	0.57233333	5.20043541	1.303467
61	0.29945228	9.08076290	2.71925515		61.00000000	0.56295082	5.11202292	1.324817
62	0.30930153	9.07657050	2.80739714		62.00000000	0.55387097	5.02724889	1.346197
63	0.31941423	9.08374980	2.90147895		63.00000000	0.54507937	4.95136457	1.367665
64	0.32927614	9.07184030	2.98714056		64.00000000	0.53656250	4.86760931	1.389037
65	0.33939850	9.07879350	3.08132890		65.00000000	0.52830769	4.79639644	1.410381
66	0.34922320	9.07921030	3.17067087		66.00000000	0.52030303	4.72394063	1.431767
67	0.35937759	9.07755470	3.26226973		67.00000000	0.51253731	4.65258550	1.453252
68	0.36955950	9.08080580	3.35589805		68.00000000	0.50500000	4.58580693	1.474641
69	0.37934697	9.07616330	3.44301505		69.00000000	0.49768116	4.51703547	1.496009
70	0.38950881	9.07821270	3.53604383		70.00000000	0.49057143	4.45351177	1.517389
71	0.39934614	9.07868000	3.62553581		71.00000000	0.48366197	4.39101227	1.538864
72	0.40946704	9.08011530	3.71800793		72.00000000	0.47694444	4.33071055	1.560239
73	0.41931704	9.07584570	3.80565675		73.00000000	0.47041096	4.26937728	1.581591
74	0.42943716	9.07160190	3.89568296		74.00000000	0.46405405	4.20971364	1.602956
75	0.43926260	9.07095620	3.98453180		75.00000000	0.45786667	4.15328848	1.624435
76	0.44940433	9.07523540	4.07845008		76.00000000	0.45184211	4.10057347	1.645805
77	0.45955575	9.04404830	4.15624440		77.00000000	0.44597403	4.03341063	1.667203
78	0.46942136	9.06293870	4.25433701		78.00000000	0.44025641	3.99001686	1.688543
79	0.47954300	9.05573560	4.34261462		79.00000000	0.43468354	3.93637925	1.710019
80	0.48935428	9.04561900	4.42651237		80.00000000	0.42925000	3.88283196	1.731407
81	0.49947518	9.01940350	4.50496819		81.00000000	0.42395062	3.82378168	1.752791
82	0.50931770	9.01602750	4.59202239		82.00000000	0.41878049	3.77573639	1.774290
83	0.51946914	8.99598880	4.67313857		83.00000000	0.41373494	3.72195488	1.795672
84	0.52922457	8.96303650	4.74345914		84.00000000	0.40880952	3.66417468	1.817017
85	0.53936779	8.89826970	4.79944006		85.00000000	0.40400000	3.59490096	1.838391
86	0.54954082	8.87158010	4.87529540		86.00000000	0.39930233	3.54244257	1.859864
87	0.55935878	8.73616890	4.88665278		87.00000000	0.39471264	3.44827632	1.881253
88	0.56945437	8.64304540	4.92181997		88.00000000	0.39022727	3.37275203	1.902610
89	0.57929319	8.43788150	4.88800729		89.00000000	0.38584270	3.25569495	1.923983
90	0.58939701	8.18320660	4.82315750		90.00000000	0.38155556	3.12234794	1.945458
91	0.59921199	7.86569640	4.71321959		91.00000000	0.37736264	2.96821994	1.966839
92	0.60935301	7.37584020	4.49449043		92.00000000	0.37326087	2.75311253	1.988335
93	0.61915833	6.78207020	4.19917526		93.00000000	0.36924731	2.50426119	2.009740
94	0.62926435	5.96249630	3.75198636		94.00000000	0.36531915	2.17821407	2.031247
95	0.63937259	4.90395120	3.13545198		95.00000000	0.36147368	1.77264931	2.052669
96	0.64915705	3.62241530	2.35151643		96.00000000	0.35770833	1.29576814	2.074041
97	0.65919906	1.97345830	1.30090186		97.00000000	0.35402062	0.69864493	2.095417
98	0.66902155	0.06451694	0.04316322		98.00000000	0.35040816	0.02260726	2.116906
99	0.67909402	-2.27596550	-1.54559456		99.00000000	0.34686869	-0.78946116	2.138303
100	0.68878847	-4.92216780	-3.39033243		100.00000000	0.34340000	-1.69027242	2.159653
101	0.69902474	-8.10021780	-5.66225264		101.00000000	0.34000000	-2.75407405	2.181032
08:53 04/04/2018
Test Lot:	JK-PERC
Recipe:	Recipe_YJX-LID
Cell Name:	3-14-11h
Test Order:	4
Test Condition:	Light
1	-0.29997745	9.08285900	-2.72465288		1.00000000	34.34000000	311.90537806	0.000000
2	-0.29015920	9.08193300	-2.63520641		2.00000000	17.17000000	155.93678961	0.061795
3	-0.28003725	9.08750720	-2.54484053		3.00000000	11.44666667	104.02166575	0.083206
4	-0.27020487	9.08867840	-2.45580517		4.00000000	8.58500000	78.02630406	0.104630
5	-0.26003307	9.08374690	-2.36207459		5.00000000	6.86800000	62.38717371	0.126124
6	-0.24985607	9.09184930	-2.27165374		6.00000000	5.72333333	52.03568416	0.147509
7	-0.24005121	9.08559420	-2.18100788		7.00000000	4.90571429	44.57132926	0.168899
8	-0.22990249	9.08079810	-2.08769809		8.00000000	4.29250000	38.97932584	0.190377
9	-0.22010805	9.09162430	-2.00113970		9.00000000	3.81555556	34.68959761	0.211831
10	-0.20996304	9.08424950	-1.90735664		10.00000000	3.43400000	31.19531278	0.233218
11	-0.20010236	9.07887080	-1.81670347		11.00000000	3.12181818	28.34258393	0.254599
12	-0.18997447	9.08550260	-1.72601354		12.00000000	2.86166667	25.99967994	0.275934
13	-0.18016887	9.09151940	-1.63800878		13.00000000	2.64153846	24.01559817	0.297426
14	-0.17001940	9.08796790	-1.54513085		14.00000000	2.45285714	22.29148698	0.318798
15	-0.16021305	9.07698440	-1.45425136		15.00000000	2.28933333	20.78024295	0.340204
16	-0.15009560	9.11084370	-1.36749755		16.00000000	2.14625000	19.55414829	0.361578
17	-0.13994464	9.06952100	-1.26923085		17.00000000	2.02000000	18.32043242	0.383050
18	-0.13012786	9.09006880	-1.18287120		18.00000000	1.90777778	17.34183126	0.404429
19	-0.12000371	9.08389570	-1.09010119		19.00000000	1.80736842	16.41794623	0.425809
20	-0.11015940	9.08263400	-1.00053751		20.00000000	1.71700000	15.59488258	0.447159
21	-0.09999654	9.08689980	-0.90865851		21.00000000	1.63523810	14.85924472	0.468630
22	-0.09019539	9.08896060	-0.81978233		22.00000000	1.56090909	14.18704123	0.490001
23	-0.08002584	9.08437440	-0.72698466		23.00000000	1.49304348	13.56336595	0.511381
24	-0.07021278	9.08780770	-0.63808025		24.00000000	1.43083333	13.00313818	0.532872
25	-0.06004397	9.08508400	-0.54550447		25.00000000	1.37360000	12.47927138	0.554243
26	-0.04990716	9.07856850	-0.45308556		26.00000000	1.32076923	11.99069393	0.575588
27	-0.04007996	9.08047290	-0.36394501		27.00000000	1.27185185	11.54901627	0.596979
28	-0.02995060	9.08237170	-0.27202245		28.00000000	1.22642857	11.13888015	0.618457
29	-0.02011224	9.07738690	-0.18256654		29.00000000	1.18413793	10.74887814	0.639831
30	-0.00999180	9.09090330	-0.09083449		30.00000000	1.14466667	10.40605398	0.661194
31	-0.00067144	9.08382890	-0.00609929		31.00000000	1.10774194	10.06253821	0.682683
32	0.00945846	9.08185960	0.08590040		32.00000000	1.07312500	9.74597058	0.704153
33	0.01932035	9.07967470	0.17542253		33.00000000	1.04060606	9.44836452	0.725526
34	0.02946283	9.07239820	0.26729850		34.00000000	1.01000000	9.16312218	0.746871
35	0.03928156	9.08570960	0.35690083		35.00000000	0.98114286	8.91437908	0.768247
36	0.04943594	9.08932970	0.44933956		36.00000000	0.95388889	8.67021061	0.789742
37	0.05920853	9.09502220	0.53850287		37.00000000	0.92810811	8.44116385	0.811111
38	0.06939491	9.06533720	0.62908825		38.00000000	0.90368421	8.19220209	0.832472
39	0.07950910	9.08406730	0.72226603		39.00000000	0.88051282	7.99863772	0.853855
40	0.08934867	9.08683970	0.81189701		40.00000000	0.85850000	7.80105188	0.875333
41	0.09946956	9.08693980	0.90387388		41.00000000	0.83756098	7.61086616	0.896714
42	0.10931062	9.08378220	0.99295386		42.00000000	0.81761905	7.42707335	0.918072
43	0.11946202	9.07869050	1.08455871		43.00000000	0.79860465	7.25028446	0.939448
44	0.12928373	9.09082320	1.17529553		44.00000000	0.78045455	7.09497429	0.960933
45	0.13942546	9.07251360	1.26493938		45.00000000	0.76311111	6.92333593	0.982297
46	0.14926353	9.10347180	1.35881634		46.00000000	0.74652174	6.79593960	1.003667
47	0.15939783	9.07130720	1.44594668		47.00000000	0.73063830	6.62784445	1.025025
48	0.16952020	9.08593850	1.54025011		48.00000000	0.71541667	6.50023184	1.046490
49	0.17933819	9.07898710	1.62820911		49.00000000	0.70081633	6.36270239	1.067866
50	0.18948215	9.09149070	1.72267520		50.00000000	0.68680000	6.24403581	1.089239
51	0.19930683	9.06695940	1.80710694		51.00000000	0.67333333	6.10508600	1.110582
52	0.20945452	9.09801100	1.90561953		52.00000000	0.66038462	6.00818650	1.132038
53	0.21926059	9.07626060	1.99006625		53.00000000	0.64792453	5.88073187	1.153399
54	0.22939712	9.08104710	2.08316605		54.00000000	0.63592593	5.77487329	1.174780
55	0.23923594	9.08243370	2.17284456		55.00000000	0.62436364	5.67074133	1.196267
56	0.24938065	9.08044430	2.26448710		56.00000000	0.61321429	5.56825817	1.217649
57	0.25949782	9.08221530	2.35681507		57.00000000	0.60245614	5.47163638	1.238989
58	0.26936343	9.08503910	2.44717729		58.00000000	0.59206897	5.37896970	1.260370
59	0.27949771	9.07827280	2.53735646		59.00000000	0.58203390	5.28386251	1.281850
60	0.28933877	9.08408260	2.62837729		60.00000000	0.57233333	5.19912327	1.303240
61	0.29946041	9.07988170	2.71906510		61.00000000	0.56295082	5.11152685	1.324589
62	0.30929253	9.09355350	2.81256817		62.00000000	0.55387097	5.03665528	1.345965
63	0.31943202	9.08049580	2.90060112		63.00000000	0.54507937	4.94959089	1.367445
64	0.32926342	9.07628540	2.98848877		64.00000000	0.53656250	4.86999438	1.388822
65	0.33941185	9.09124850	3.08567747		65.00000000	0.52830769	4.80297652	1.410176
66	0.34919560	9.06565090	3.16568541		66.00000000	0.52030303	4.71688563	1.431566
67	0.35938495	9.09482380	3.26854280		67.00000000	0.51253731	4.66143656	1.453044
68	0.36953413	9.07900710	3.35500299		68.00000000	0.50500000	4.58489859	1.474424
69	0.37933201	9.07631020	3.44293499		69.00000000	0.49768116	4.51710858	1.495776
70	0.38949457	9.09053130	3.54071258		70.00000000	0.49057143	4.45955493	1.517146
71	0.39933193	9.07463840	3.62379287		71.00000000	0.48366197	4.38905750	1.538625
72	0.40947440	9.07371040	3.71545212		72.00000000	0.47694444	4.32765577	1.560008
73	0.41927078	9.07632060	3.80543602		73.00000000	0.47041096	4.26960068	1.581349
74	0.42945346	9.07133670	3.89571693		74.00000000	0.46405405	4.20959057	1.602729
75	0.43927369	9.07071110	3.98452474		75.00000000	0.45786667	4.15317626	1.624206
76	0.44938788	9.06155870	4.07215465		76.00000000	0.45184211	4.09439376	1.645588
77	0.45954672	9.06529050	4.16592452		77.00000000	0.44597403	4.04288410	1.666961
78	0.46940562	9.06085300	4.25321532		78.00000000	0.44025641	3.98909862	1.688324
79	0.47957042	9.06238370	4.34605116		79.00000000	0.43468354	3.93926907	1.709789
80	0.48938468	9.05060290	4.42922640		80.00000000	0.42925000	3.88497129	1.731177
81	0.49947134	9.02531340	4.50788538		81.00000000	0.42395062	3.82628719	1.752553
82	0.50932133	9.02115150	4.59466488		82.00000000	0.41878049	3.77788223	1.773889
83	0.51947272	8.98433020	4.66711445		83.00000000	0.41373494	3.71713131	1.795356
84	0.52924681	8.96007250	4.74208979		84.00000000	0.40880952	3.66296297	1.816730
85	0.53937960	8.91114230	4.80648837		85.00000000	0.40400000	3.60010149	1.838116
86	0.54952061	8.84173870	4.85871764		86.00000000	0.39930233	3.53052683	1.859606
87	0.55935645	8.76768490	4.90426110		87.00000000	0.39471264	3.46071609	1.880980
88	0.56946766	8.61127850	4.90384462		88.00000000	0.39022727	3.36035572	1.902323
89	0.57929307	8.45093820	4.89556993		89.00000000	0.38584270	3.26073278	1.923709
90	0.58941549	8.18460750	4.82413444		90.00000000	0.38155556	3.12288246	1.945185
91	0.59922975	7.86776300	4.71459766		91.00000000	0.37736264	2.96899980	1.966571
92	0.60934544	7.39394190	4.50546478		92.00000000	0.37326087	2.75986918	1.988031
93	0.61912990	6.79141090	4.20476555		93.00000000	0.36924731	2.50771022	2.009437
94	0.62925082	5.95774410	3.74891536		94.00000000	0.36531915	2.17647800	2.030942
95	0.63939625	4.91668080	3.14370727		95.00000000	0.36147368	1.77725072	2.052318
96	0.64918298	3.61485220	2.34670052		96.00000000	0.35770833	1.29306276	2.073664
97	0.65920115	1.98006990	1.30526436		97.00000000	0.35402062	0.70098557	2.095089
98	0.66896927	0.05373100	0.03594439		98.00000000	0.35040816	0.01882778	2.116583
99	0.67911696	-2.30362530	-1.56443101		99.00000000	0.34686869	-0.79905548	2.138015
100	0.68881959	-4.96706440	-3.42141126		100.00000000	0.34340000	-1.70568991	2.159387
101	0.69904542	-8.16904540	-5.71053377		101.00000000	0.34000000	-2.77747544	2.180765
