# Supplementary material for: Study on the Electrical Injection Regeneration of Industrialized B-Doped Czochralski Silicon PERC Solar Cells
Source: Hindawi journal article supplement (doi:10.1155/2019/5357370), 2019-06-20
Supplement: f1 [file 5357370.f1.zip › section3.3/IVRawData_3-14-12h.csv]

09:54 04/04/2018
Test Lot:	JK-PERC
Recipe:	Recipe_YJX-LID
Cell Name:	3-14-12h
Test Order:	2
Test Condition:	Light
1	-0.29992324	9.09183790	-2.72685348		1.00000000	34.34000000	312.21371349	0.000000
2	-0.29010579	9.08885100	-2.63672830		2.00000000	17.17000000	156.05557167	0.061807
3	-0.28000402	9.07164570	-2.54009726		3.00000000	11.44666667	103.84010445	0.083253
4	-0.27015904	9.09837720	-2.45800885		4.00000000	8.58500000	78.10956826	0.104627
5	-0.26002380	9.07984730	-2.36097640		5.00000000	6.86800000	62.36039126	0.126122
6	-0.24984539	9.08022120	-2.26865141		6.00000000	5.72333333	51.96913267	0.147497
7	-0.24005100	9.08999730	-2.18206294		7.00000000	4.90571429	44.59292961	0.168887
8	-0.22990385	9.07708640	-2.08685711		8.00000000	4.29250000	38.96339337	0.190235
9	-0.22007522	9.08819290	-2.00008605		9.00000000	3.81555556	34.67650491	0.211713
10	-0.20995486	9.08058640	-1.90651325		10.00000000	3.43400000	31.18273370	0.233094
11	-0.20012327	9.08278080	-1.81767579		11.00000000	3.12181818	28.35479024	0.254474
12	-0.18995601	9.07509420	-1.72386868		12.00000000	2.86166667	25.96989457	0.275949
13	-0.18017131	9.08397580	-1.63667182		13.00000000	2.64153846	23.99567146	0.297336
14	-0.16997428	9.08332820	-1.54393217		14.00000000	2.45285714	22.28010646	0.318692
15	-0.16018140	9.07869050	-1.45423735		15.00000000	2.28933333	20.78414878	0.340069
16	-0.15002531	9.08020590	-1.36226071		16.00000000	2.14625000	19.48839191	0.361556
17	-0.13988708	9.07884880	-1.27001365		17.00000000	2.02000000	18.33927458	0.382929
18	-0.13004880	9.09017940	-1.18216692		18.00000000	1.90777778	17.34204226	0.404269
19	-0.11993215	9.08427810	-1.08949700		19.00000000	1.80736842	16.41863737	0.425653
20	-0.11011767	9.07202630	-0.99899040		20.00000000	1.71700000	15.57666916	0.447141
21	-0.09992735	9.08613010	-0.90795291		21.00000000	1.63523810	14.85798608	0.468529
22	-0.09011139	9.08335490	-0.81851374		22.00000000	1.56090909	14.17829124	0.489875
23	-0.07996944	9.08445170	-0.72647848		23.00000000	1.49304348	13.56348136	0.511255
24	-0.07016911	9.07405760	-0.63671851		24.00000000	1.43083333	12.98346408	0.532728
25	-0.06000855	9.08955860	-0.54545125		25.00000000	1.37360000	12.48541769	0.554114
26	-0.04986660	9.06836800	-0.45220870		26.00000000	1.32076923	11.97722143	0.575456
27	-0.04002310	9.08747390	-0.36370890		27.00000000	1.27185185	11.55792051	0.596837
28	-0.02987892	9.08417130	-0.27142525		28.00000000	1.22642857	11.14108723	0.618315
29	-0.02006073	9.08051490	-0.18216172		29.00000000	1.18413793	10.75258213	0.639688
30	-0.00995525	9.08834840	-0.09047675		30.00000000	1.14466667	10.40312947	0.661048
31	-0.00068408	9.07980540	-0.00621128		31.00000000	1.10774194	10.05808121	0.682541
32	0.00949264	9.08103560	0.08620302		32.00000000	1.07312500	9.74508633	0.704025
33	0.01928526	9.08459000	0.17519864		33.00000000	1.04060606	9.45347941	0.725410
34	0.02943585	9.07506370	0.26713217		34.00000000	1.01000000	9.16581434	0.746774
35	0.03926716	9.08372210	0.35669193		35.00000000	0.98114286	8.91242905	0.768187
36	0.04939393	9.07209490	0.44810642		36.00000000	0.95388889	8.65377052	0.789660
37	0.05922078	9.09487250	0.53860544		37.00000000	0.92810811	8.44102491	0.811044
38	0.06936467	9.07817170	0.62970436		38.00000000	0.90368421	8.20380043	0.832436
39	0.07951526	9.08248420	0.72219606		39.00000000	0.88051282	7.99724378	0.853788
40	0.08931755	9.08291150	0.81126336		40.00000000	0.85850000	7.79767952	0.875259
41	0.09948972	9.08407590	0.90377216		41.00000000	0.83756098	7.60846747	0.896639
42	0.10930168	9.07247730	0.99163701		42.00000000	0.81761905	7.41783025	0.918026
43	0.11945599	9.07608700	1.08419296		43.00000000	0.79860465	7.24820529	0.939522
44	0.12926275	9.07264420	1.17275494		44.00000000	0.78045455	7.08078641	0.960907
45	0.13944235	9.08525750	1.26686966		45.00000000	0.76311111	6.93306095	0.982257
46	0.14924985	9.08025930	1.35522734		46.00000000	0.74652174	6.77861096	1.003632
47	0.15939747	9.09268570	1.44935110		47.00000000	0.73063830	6.64346440	1.025124
48	0.16954583	9.07407950	1.53847234		48.00000000	0.71541667	6.49174771	1.046511
49	0.17936225	9.08172320	1.62891831		49.00000000	0.70081633	6.36461989	1.067856
50	0.18950316	9.08489040	1.72161544		50.00000000	0.68680000	6.23950273	1.089227
51	0.19929281	9.07915970	1.80941125		51.00000000	0.67333333	6.11330086	1.110709
52	0.20945455	9.08739850	1.90339696		52.00000000	0.66038462	6.00117816	1.132086
53	0.21925685	9.08370880	1.99166538		53.00000000	0.64792453	5.88555774	1.153430
54	0.22938436	9.08970170	2.08503541		54.00000000	0.63592593	5.78037697	1.174810
55	0.23926257	9.07233330	2.17066978		55.00000000	0.62436364	5.66443501	1.196280
56	0.24939677	9.07824130	2.26408406		56.00000000	0.61321429	5.56690725	1.217656
57	0.25952727	9.08274460	2.35721991		57.00000000	0.60245614	5.47195526	1.238994
58	0.26935485	9.08684160	2.44758486		58.00000000	0.59206897	5.38003691	1.260366
59	0.27951959	9.08163260	2.53849422		59.00000000	0.58203390	5.28581803	1.281854
60	0.28931072	9.07172780	2.62454810		60.00000000	0.57233333	5.19205221	1.303233
61	0.29947323	9.07079320	2.71645974		61.00000000	0.56295082	5.10641047	1.324606
62	0.30930826	9.08810140	2.81102483		62.00000000	0.55387097	5.03363552	1.345980
63	0.31940451	9.06872840	2.89659275		63.00000000	0.54507937	4.94317672	1.367498
64	0.32920977	9.07664780	2.98812113		64.00000000	0.53656250	4.87018884	1.388886
65	0.33937675	9.08130260	3.08198296		65.00000000	0.52830769	4.79772202	1.410248
66	0.34920806	9.07274060	3.16827414		66.00000000	0.52030303	4.72057443	1.431616
67	0.35936609	9.07443620	3.26104466		67.00000000	0.51253731	4.65098715	1.453091
68	0.36951295	9.08028790	3.35528397		68.00000000	0.50500000	4.58554539	1.474462
69	0.37935096	9.06623840	3.43928624		69.00000000	0.49768116	4.51209604	1.495851
70	0.38947326	9.07198330	3.53329491		70.00000000	0.49057143	4.45045581	1.517218
71	0.39932021	9.07452680	3.62364195		71.00000000	0.48366197	4.38900353	1.538730
72	0.40944028	9.06400390	3.71116829		72.00000000	0.47694444	4.32302630	1.560125
73	0.41924107	9.07714650	3.80551261		73.00000000	0.47041096	4.26998919	1.581509
74	0.42941549	9.06229310	3.89148903		74.00000000	0.46405405	4.20539385	1.602984
75	0.43923041	9.08146950	3.98885757		75.00000000	0.45786667	4.15810217	1.624367
76	0.44938770	9.05725860	4.07022061		76.00000000	0.45184211	4.09245079	1.645722
77	0.45951524	9.06083300	4.16359085		77.00000000	0.44597403	4.04089617	1.667096
78	0.46938673	9.06076620	4.25300342		78.00000000	0.44025641	3.98906040	1.688568
79	0.47955742	9.05366990	4.34175458		79.00000000	0.43468354	3.93548132	1.709949
80	0.48937160	9.03423400	4.42109755		80.00000000	0.42925000	3.87794494	1.731356
81	0.49947011	9.03118990	4.51080941		81.00000000	0.42395062	3.82877853	1.752743
82	0.50932819	9.00798990	4.58802319		82.00000000	0.41878049	3.77237040	1.774237
83	0.51947582	8.99318030	4.67173971		83.00000000	0.41373494	3.72079291	1.795632
84	0.52924985	8.95429130	4.73905733		84.00000000	0.40880952	3.66059956	1.816979
85	0.53936839	8.90342810	4.80222768		85.00000000	0.40400000	3.59698495	1.838347
86	0.54951382	8.83575630	4.85537020		86.00000000	0.39930233	3.52813804	1.859845
87	0.55934733	8.73221210	4.88433952		87.00000000	0.39471264	3.44671452	1.881221
88	0.56948084	8.61807540	4.90782882		88.00000000	0.39022727	3.36300806	1.902593
89	0.57929355	8.42725850	4.88185649		89.00000000	0.38584270	3.25159614	1.923980
90	0.58943743	8.16936780	4.81533116		90.00000000	0.38155556	3.11706767	1.945451
91	0.59923154	7.81494760	4.68296309		91.00000000	0.37736264	2.94906924	1.966834
92	0.60931957	7.34635070	4.47627525		92.00000000	0.37326087	2.74210525	1.988301
93	0.61917096	6.73294880	4.16884637		93.00000000	0.36924731	2.48612325	2.009712
94	0.62927616	5.90947720	3.71869312		94.00000000	0.36531915	2.15884518	2.031234
95	0.63936275	4.85498480	3.10409643		95.00000000	0.36147368	1.75494924	2.052625
96	0.64911890	3.56648330	2.31507172		96.00000000	0.35770833	1.27576080	2.074021
97	0.65921664	1.94035740	1.27911589		97.00000000	0.35402062	0.68692653	2.095388
98	0.66895866	0.06002815	0.04015635		98.00000000	0.35040816	0.02103435	2.116876
99	0.67907876	-2.23606350	-1.51846323		99.00000000	0.34686869	-0.77562041	2.138254
100	0.68881404	-4.80092810	-3.30694668		100.00000000	0.34340000	-1.64863871	2.159647
101	0.69900554	-7.86277770	-5.49612517		101.00000000	0.34000000	-2.67334442	2.181003
09:55 04/04/2018
Test Lot:	JK-PERC
Recipe:	Recipe_YJX-LID
Cell Name:	3-14-12h
Test Order:	3
Test Condition:	Light
1	-0.29998279	9.08092880	-2.72412236		1.00000000	34.34000000	311.83909499	0.000000
2	-0.29010803	9.09173110	-2.63758420		2.00000000	17.17000000	156.10502299	0.021581
3	-0.27997798	9.06669430	-2.53847476		3.00000000	11.44666667	103.78342742	0.042983
4	-0.27017394	9.09136770	-2.45625063		4.00000000	8.58500000	78.04939170	0.064336
5	-0.26002455	9.07539940	-2.35982665		5.00000000	6.86800000	62.32984308	0.085761
6	-0.24988706	9.08763600	-2.27088264		6.00000000	5.72333333	52.01157004	0.107251
7	-0.24005993	9.06764220	-2.17677755		7.00000000	4.90571429	44.48326188	0.128621
8	-0.22991277	9.09383580	-2.09078898		8.00000000	4.29250000	39.03529017	0.150018
9	-0.22003727	9.08233070	-1.99845125		9.00000000	3.81555556	34.65413736	0.171418
10	-0.20988639	9.07565120	-1.90485567		10.00000000	3.43400000	31.16578622	0.192907
11	-0.20007266	9.08647250	-1.81795472		11.00000000	3.12181818	28.36631506	0.214296
12	-0.18995675	9.07638550	-1.72412069		12.00000000	2.86166667	25.97358984	0.235645
13	-0.18017653	9.08613870	-1.63710894		13.00000000	2.64153846	24.00138484	0.257013
14	-0.17000256	9.08589840	-1.54462599		14.00000000	2.45285714	22.28641079	0.278508
15	-0.16020522	9.08767890	-1.45589360		15.00000000	2.28933333	20.80472623	0.299899
16	-0.15004317	9.07542610	-1.36170570		16.00000000	2.14625000	19.47813327	0.321239
17	-0.13990718	9.09109210	-1.27190906		17.00000000	2.02000000	18.36400604	0.342613
18	-0.13010238	9.07057290	-1.18010312		18.00000000	1.90777778	17.30463741	0.364086
19	-0.11990014	9.08727360	-1.08956538		19.00000000	1.80736842	16.42405134	0.385467
20	-0.11009237	9.07835670	-0.99945780		20.00000000	1.71700000	15.58753845	0.406864
21	-0.09994298	9.09512230	-0.90899364		21.00000000	1.63523810	14.87269047	0.428233
22	-0.09011362	9.07377910	-0.81767105		22.00000000	1.56090909	14.16334429	0.449707
23	-0.07999177	9.08298300	-0.72656384		23.00000000	1.49304348	13.56128853	0.471079
24	-0.07018771	9.08577160	-0.63770950		24.00000000	1.43083333	13.00022486	0.492459
25	-0.06003907	9.08376690	-0.54538088		25.00000000	1.37360000	12.47746221	0.513815
26	-0.04991945	9.07305620	-0.45292193		26.00000000	1.32076923	11.98341346	0.535294
27	-0.04007297	9.07981200	-0.36385500		27.00000000	1.27185185	11.54817571	0.556675
28	-0.02993995	9.08846860	-0.27210830		28.00000000	1.22642857	11.14635756	0.578058
29	-0.02010910	9.07734390	-0.18253723		29.00000000	1.18413793	10.74882723	0.599545
30	-0.00996790	9.09329510	-0.09064105		30.00000000	1.14466667	10.40879179	0.620911
31	-0.00071980	9.08025070	-0.00653597		31.00000000	1.10774194	10.05857449	0.642386
32	0.00947478	9.07758710	0.08600815		32.00000000	1.07312500	9.74138566	0.663767
33	0.01925698	9.08511070	0.17495176		33.00000000	1.04060606	9.45402126	0.685241
34	0.02941649	9.08361720	0.26720817		34.00000000	1.01000000	9.17445337	0.706612
35	0.03924781	9.06624890	0.35583039		35.00000000	0.98114286	8.89528535	0.727956
36	0.04936788	9.08205320	0.44836173		36.00000000	0.95388889	8.66326964	0.749329
37	0.05919920	9.07980350	0.53751706		37.00000000	0.92810811	8.42703925	0.770802
38	0.06933788	9.07705690	0.62938384		38.00000000	0.90368421	8.20279300	0.792181
39	0.07950930	9.08111380	0.72203303		39.00000000	0.88051282	7.99603713	0.813536
40	0.08935029	9.07481000	0.81083691		40.00000000	0.85850000	7.79072439	0.834908
41	0.09947856	9.07929610	0.90319528		41.00000000	0.83756098	7.60446410	0.856382
42	0.10928084	9.07326790	0.99153434		42.00000000	0.81761905	7.41847666	0.877765
43	0.11943738	9.09385590	1.08614632		43.00000000	0.79860465	7.26239562	0.899111
44	0.12926796	9.07412430	1.17299354		44.00000000	0.78045455	7.08194156	0.920486
45	0.13944416	9.07505040	1.26546278		45.00000000	0.76311111	6.92527179	0.941964
46	0.14926746	9.07555100	1.35468445		46.00000000	0.74652174	6.77509612	1.003583
47	0.15942495	9.07507320	1.44679309		47.00000000	0.73063830	6.63059604	1.025063
48	0.16954148	9.08145520	1.53968336		48.00000000	0.71541667	6.49702441	1.046494
49	0.17933652	9.07523350	1.62752079		49.00000000	0.70081633	6.36007180	1.067847
50	0.18950589	9.07997510	1.72070876		50.00000000	0.68680000	6.23612690	1.089209
51	0.19929124	9.07802100	1.80917006		51.00000000	0.67333333	6.11253414	1.110696
52	0.20946063	9.07524390	1.90090630		52.00000000	0.66038462	5.99315145	1.132072
53	0.21927203	9.07872870	1.99071127		53.00000000	0.64792453	5.88233101	1.153487
54	0.22944067	9.06828590	2.08063359		54.00000000	0.63592593	5.76675811	1.174865
55	0.23926918	9.08113480	2.17283568		55.00000000	0.62436364	5.66993035	1.196350
56	0.24939540	9.07764530	2.26392298		56.00000000	0.61321429	5.56654178	1.217724
57	0.25952536	9.06790920	2.35335240		57.00000000	0.60245614	5.46301758	1.239106
58	0.26935014	9.08102800	2.44597616		58.00000000	0.59206897	5.37659485	1.260446
59	0.27950761	9.07154560	2.53556603		59.00000000	0.58203390	5.27994705	1.281920
60	0.28931975	9.09187890	2.63046013		60.00000000	0.57233333	5.20358536	1.303302
61	0.29947576	9.06560900	2.71493015		61.00000000	0.56295082	5.10349202	1.324688
62	0.30928567	9.08870320	2.81100566		62.00000000	0.55387097	5.03396884	1.346167
63	0.31939253	9.07975290	2.90000525		63.00000000	0.54507937	4.94918595	1.367550
64	0.32923743	9.07831950	2.98892258		64.00000000	0.53656250	4.87108581	1.388912
65	0.33943805	9.09026050	3.08558030		65.00000000	0.52830769	4.80245455	1.410293
66	0.34923160	9.06629850	3.16623793		66.00000000	0.52030303	4.71722258	1.431779
67	0.35938609	9.07428930	3.26117335		67.00000000	0.51253731	4.65091186	1.453148
68	0.36953390	9.07308390	3.35281208		68.00000000	0.50500000	4.58190737	1.474544
69	0.37933192	9.08645530	3.44678253		69.00000000	0.49768116	4.52215761	1.495914
70	0.38948491	9.06868360	3.53211542		70.00000000	0.49057143	4.44883707	1.517396
71	0.39928588	9.07649710	3.62411713		71.00000000	0.48366197	4.38995648	1.538783
72	0.40948206	9.07115650	3.71447585		72.00000000	0.47694444	4.32643770	1.560121
73	0.41928974	9.06994340	3.80293421		73.00000000	0.47041096	4.26660077	1.581490
74	0.42945245	9.05906580	3.89043800		74.00000000	0.46405405	4.20389621	1.602965
75	0.43926606	9.06742480	3.98301197		75.00000000	0.45786667	4.15167157	1.624339
76	0.44938633	9.06150720	4.07211746		76.00000000	0.45184211	4.09437049	1.645741
77	0.45955870	9.05509000	4.16134539		77.00000000	0.44597403	4.03833494	1.667119
78	0.46943557	9.06162740	4.25385022		78.00000000	0.44025641	3.98943955	1.688602
79	0.47956702	9.04421230	4.33730594		79.00000000	0.43468354	3.93137026	1.709985
80	0.48937842	9.05695920	4.43228038		80.00000000	0.42925000	3.88769974	1.731334
81	0.49948826	9.01934240	4.50505564		81.00000000	0.42395062	3.82375578	1.752708
82	0.50933838	9.01528550	4.59183091		82.00000000	0.41878049	3.77542566	1.774185
83	0.51947647	8.99303720	4.67167122		83.00000000	0.41373494	3.72073370	1.795564
84	0.52926183	8.95580290	4.73996463		84.00000000	0.40880952	3.66121752	1.816921
85	0.53937840	8.90869050	4.80515523		85.00000000	0.40400000	3.59911096	1.838290
86	0.54955965	8.84332280	4.85993338		86.00000000	0.39930233	3.53115936	1.859770
87	0.55935025	8.76045890	4.90016488		87.00000000	0.39471264	3.45786389	1.881148
88	0.56951141	8.62192630	4.91028540		88.00000000	0.39022727	3.36451079	1.902540
89	0.57928485	8.43893910	4.88854957		89.00000000	0.38584270	3.25610302	1.923895
90	0.58940810	8.19032000	4.82744095		90.00000000	0.38155556	3.12506210	1.945377
91	0.59920090	7.85573390	4.70716282		91.00000000	0.37736264	2.96446046	1.966762
92	0.60932714	7.37325100	4.49272194		92.00000000	0.37326087	2.75214608	1.988231
93	0.61913556	6.76291280	4.18715980		93.00000000	0.36924731	2.49718737	2.009736
94	0.62925285	5.95494890	3.74716857		94.00000000	0.36531915	2.17545686	2.031111
95	0.63937533	4.88785030	3.12517090		95.00000000	0.36147368	1.76682926	2.052468
96	0.64917409	3.60029200	2.33721628		96.00000000	0.35770833	1.28785445	2.073844
97	0.65917748	1.95413600	1.28812244		97.00000000	0.35402062	0.69180444	2.095333
98	0.66902018	0.03685266	0.02465517		98.00000000	0.35040816	0.01291347	2.116703
99	0.67910695	-2.30649760	-1.56635855		99.00000000	0.34686869	-0.80005179	2.138113
100	0.68880224	-4.96164510	-3.41759226		100.00000000	0.34340000	-1.70382893	2.159502
101	0.69901776	-8.13758090	-5.68831357		101.00000000	0.34000000	-2.76677751	2.180985
09:55 04/04/2018
Test Lot:	JK-PERC
Recipe:	Recipe_YJX-LID
Cell Name:	3-14-12h
Test Order:	4
Test Condition:	Light
1	-0.29989845	9.09198280	-2.72667155		1.00000000	34.34000000	312.21868935	0.000000
2	-0.29010254	9.08691120	-2.63613602		2.00000000	17.17000000	156.02226530	0.061770
3	-0.27996355	9.08183100	-2.54258165		3.00000000	11.44666667	103.95669218	0.083184
4	-0.27016097	9.08087440	-2.45329784		4.00000000	8.58500000	77.95930672	0.104624
5	-0.25996393	9.08091640	-2.36071072		5.00000000	6.86800000	62.36773384	0.126135
6	-0.24980560	9.07954310	-2.26812071		6.00000000	5.72333333	51.96525168	0.147533
7	-0.23999260	9.08393000	-2.18007598		7.00000000	4.90571429	44.56316517	0.168927
8	-0.22983278	9.07442280	-2.08559982		8.00000000	4.29250000	38.95195987	0.190278
9	-0.22002797	9.07786750	-1.99738476		9.00000000	3.81555556	34.63710777	0.211766
10	-0.20988525	9.09457300	-1.90881673		10.00000000	3.43400000	31.23076368	0.233153
11	-0.20006928	9.08409020	-1.81744739		11.00000000	3.12181818	28.35887795	0.254504
12	-0.18992582	9.07177540	-1.72296438		12.00000000	2.86166667	25.96039727	0.275878
13	-0.18016343	9.09016040	-1.63771448		13.00000000	2.64153846	24.01200832	0.297349
14	-0.16998425	9.07248690	-1.54217988		14.00000000	2.45285714	22.25351430	0.318721
15	-0.16014148	9.06940270	-1.45238757		15.00000000	2.28933333	20.76288591	0.340118
16	-0.14997049	9.07728960	-1.36132557		16.00000000	2.14625000	19.48213280	0.361463
17	-0.13981885	9.07569410	-1.26895311		17.00000000	2.02000000	18.33290208	0.382946
18	-0.13001105	9.07380490	-1.17969490		18.00000000	1.90777778	17.31080335	0.404336
19	-0.11989960	9.07987690	-1.08867361		19.00000000	1.80736842	16.41068278	0.425714
20	-0.11005311	9.08534050	-0.99986998		20.00000000	1.71700000	15.59952964	0.447192
21	-0.09993348	9.07298760	-0.90669518		21.00000000	1.63523810	14.83649496	0.468579
22	-0.09006316	9.08669380	-0.81837638		22.00000000	1.56090909	14.18350296	0.489931
23	-0.07995990	9.07594110	-0.72571133		23.00000000	1.49304348	13.55077467	0.511310
24	-0.07011266	9.07372470	-0.63618298		24.00000000	1.43083333	12.98298776	0.532794
25	-0.05997293	9.07833290	-0.54445423		25.00000000	1.37360000	12.46999807	0.554179
26	-0.04980641	9.08822440	-0.45265179		26.00000000	1.32076923	12.00344715	0.575538
27	-0.04000829	9.07205100	-0.36295723		27.00000000	1.27185185	11.53830486	0.596909
28	-0.02985888	9.08061120	-0.27113688		28.00000000	1.22642857	11.13672102	0.618387
29	-0.02002429	9.07796570	-0.18177985		29.00000000	1.18413793	10.74956352	0.639768
30	-0.00989424	9.06013970	-0.08964318		30.00000000	1.14466667	10.37083991	0.661139
31	-0.00063645	9.08606340	-0.00578282		31.00000000	1.10774194	10.06501346	0.682629
32	0.00951870	9.07199100	0.08635358		32.00000000	1.07312500	9.73538034	0.704121
33	0.01933664	9.07227800	0.17542733		33.00000000	1.04060606	9.44066747	0.725492
34	0.02947682	9.06863120	0.26731444		34.00000000	1.01000000	9.15931751	0.746828
35	0.03930666	9.07003970	0.35651299		35.00000000	0.98114286	8.89900467	0.768203
36	0.04945429	9.08161070	0.44912461		36.00000000	0.95388889	8.66284754	0.789678
37	0.05927892	9.07324410	0.53785215		37.00000000	0.92810811	8.42095142	0.811048
38	0.06938116	9.07921600	0.62992649		38.00000000	0.90368421	8.20474414	0.832399
39	0.07957344	9.07924750	0.72246694		39.00000000	0.88051282	7.99439382	0.853776
40	0.08935267	9.08208080	0.81150814		40.00000000	0.85850000	7.79696637	0.875257
41	0.09953974	9.08994010	0.90481029		41.00000000	0.83756098	7.61337910	0.896637
42	0.10934205	9.08025070	0.99285323		42.00000000	0.81761905	7.42418593	0.918004
43	0.11946438	9.07416920	1.08404000		43.00000000	0.79860465	7.24667373	0.939370
44	0.12928306	9.08563230	1.17461835		44.00000000	0.78045455	7.09092303	0.960844
45	0.13946715	9.09148410	1.26796338		45.00000000	0.76311111	6.93781253	0.982214
46	0.14927466	9.07169910	1.35417480		46.00000000	0.74652174	6.77222059	1.003600
47	0.15940294	9.07775880	1.44702144		47.00000000	0.73063830	6.63255824	1.024967
48	0.16958034	9.08361630	1.54040274		48.00000000	0.71541667	6.49857049	1.046440
49	0.17942134	9.08548070	1.63012912		49.00000000	0.70081633	6.36725321	1.067824
50	0.18954292	9.07893850	1.72084851		50.00000000	0.68680000	6.23541496	1.089207
51	0.19933927	9.07123850	1.80825406		51.00000000	0.67333333	6.10796726	1.110687
52	0.20947574	9.07920930	1.90187409		52.00000000	0.66038462	5.99577014	1.132081
53	0.21929814	9.08613970	1.99257354		53.00000000	0.64792453	5.88713278	1.153440
54	0.22944130	9.07620530	2.08245634		54.00000000	0.63592593	5.77179426	1.174813
55	0.23926668	9.07304380	2.17087707		55.00000000	0.62436364	5.66487862	1.196285
56	0.24943365	9.07684610	2.26407085		56.00000000	0.61321429	5.56605170	1.217660
57	0.25956193	9.07581420	2.35573585		57.00000000	0.60245614	5.46777999	1.239013
58	0.26938805	9.08528230	2.44746648		58.00000000	0.59206897	5.37911369	1.260386
59	0.27951336	9.07649900	2.53700273		59.00000000	0.58203390	5.28283010	1.281864
60	0.28936106	9.07831760	2.62691160		60.00000000	0.57233333	5.19582377	1.303242
61	0.29947743	9.06968980	2.71616739		61.00000000	0.56295082	5.10578931	1.324650
62	0.30933109	9.06645680	2.80453696		62.00000000	0.55387097	5.02164720	1.346046
63	0.31948391	9.07193090	2.89833596		63.00000000	0.54507937	4.94492234	1.367543
64	0.32928771	9.08646870	2.99206247		64.00000000	0.53656250	4.87545836	1.388920
65	0.33943534	9.07259180	3.07955828		65.00000000	0.52830769	4.79312004	1.410273
66	0.34925923	9.07441430	3.16932295		66.00000000	0.52030303	4.72144526	1.431661
67	0.35940686	9.07774730	3.26260465		67.00000000	0.51253731	4.65268421	1.453144
68	0.36956194	9.07663730	3.35437969		68.00000000	0.50500000	4.58370184	1.474516
69	0.37937316	9.06978800	3.44083413		69.00000000	0.49768116	4.51386261	1.495866
70	0.38950813	9.07548430	3.53497492		70.00000000	0.49057143	4.45217330	1.517242
71	0.39933947	9.06514640	3.62007076		71.00000000	0.48366197	4.38446658	1.538714
72	0.40949604	9.07690240	3.71695559		72.00000000	0.47694444	4.32917817	1.560089
73	0.41931546	9.07051750	3.80340822		73.00000000	0.47041096	4.26687083	1.581448
74	0.42943257	9.07283880	3.89617248		74.00000000	0.46405405	4.21028763	1.602813
75	0.43929440	9.06007670	3.98004096		75.00000000	0.45786667	4.14830712	1.624285
76	0.44944054	9.08175560	4.08170914		76.00000000	0.45184211	4.10351957	1.645692
77	0.45957777	9.05263330	4.16038902		77.00000000	0.44597403	4.03723932	1.667084
78	0.46941727	9.05387020	4.25004303		78.00000000	0.44025641	3.98602439	1.688430
79	0.47957608	9.05687240	4.34345936		79.00000000	0.43468354	3.93687340	1.709909
80	0.48938805	9.02927490	4.41881924		80.00000000	0.42925000	3.87581625	1.731285
81	0.49953419	9.03162960	4.51160778		81.00000000	0.42395062	3.82896494	1.752667
82	0.50935286	9.01213360	4.59035602		82.00000000	0.41878049	3.77410571	1.774140
83	0.51946926	8.99199960	4.67106738		83.00000000	0.41373494	3.72030441	1.795512
84	0.52927154	8.95563890	4.73996479		84.00000000	0.40880952	3.66115047	1.816856
85	0.53942215	8.90641980	4.80432012		85.00000000	0.40400000	3.59819360	1.838237
86	0.54956007	8.84716510	4.86204867		86.00000000	0.39930233	3.53269360	1.859714
87	0.55938995	8.74789430	4.89348416		87.00000000	0.39471264	3.45290449	1.881103
88	0.56948698	8.60371690	4.89970475		88.00000000	0.39022727	3.35740498	1.902463
89	0.57930636	8.44399640	4.89166082		89.00000000	0.38584270	3.25805434	1.923845
90	0.58946371	8.19175530	4.82874247		90.00000000	0.38155556	3.12560974	1.945326
91	0.59926450	7.84808490	4.70307867		91.00000000	0.37736264	2.96157402	1.966709
92	0.60938090	7.38860700	4.50247598		92.00000000	0.37326087	2.75787787	1.988169
93	0.61917871	6.76671170	4.18980382		93.00000000	0.36924731	2.49859011	2.009574
94	0.62927347	5.95187620	3.74535779		94.00000000	0.36531915	2.17433435	2.031084
95	0.63939506	4.87386990	3.11632834		95.00000000	0.36147368	1.76177571	2.052461
96	0.64917803	3.60977750	2.34338825		96.00000000	0.35770833	1.29124749	2.073863
97	0.65922445	1.95361760	1.28787249		97.00000000	0.35402062	0.69162091	2.095235
98	0.66904163	0.03121537	0.02088438		98.00000000	0.35040816	0.01093812	2.116745
99	0.67911112	-2.30715610	-1.56681536		99.00000000	0.34686869	-0.80028021	2.138148
100	0.68884349	-4.96377850	-3.41926651		100.00000000	0.34340000	-1.70456154	2.159501
101	0.69905585	-8.14594840	-5.69447288		101.00000000	0.34000000	-2.76962246	2.180867
