# Supplementary material for: Study on the Electrical Injection Regeneration of Industrialized B-Doped Czochralski Silicon PERC Solar Cells
Source: Hindawi journal article supplement (doi:10.1155/2019/5357370), 2019-06-20
Supplement: f1 [file 5357370.f1.zip › section3.3/IVRawData_3-16-4h.csv]

00:57 04/04/2018
Test Lot:	JK-PERC
Recipe:	Recipe_YJX-LID
Cell Name:	3-16-4h
Test Order:	2
Test Condition:	Light
1	-0.29990742	9.11425400	-2.73343240		1.00000000	34.34000000	312.98348236	0.000000
2	-0.29010919	9.10913560	-2.64264395		2.00000000	17.17000000	156.40385825	0.061797
3	-0.27993810	9.09530540	-2.54612251		3.00000000	11.44666667	104.11092915	0.083217
4	-0.27016965	9.10924530	-2.46104161		4.00000000	8.58500000	78.20287090	0.104710
5	-0.25995612	9.09934900	-2.36543146		5.00000000	6.86800000	62.49432893	0.126083
6	-0.24979919	9.09887310	-2.27289113		6.00000000	5.72333333	52.07588371	0.147421
7	-0.23998088	9.12606620	-2.19008140		7.00000000	4.90571429	44.76987333	0.168809
8	-0.22987081	9.10563560	-2.09311983		8.00000000	4.29250000	39.08594081	0.190337
9	-0.22003984	9.09884640	-2.00210871		9.00000000	3.81555556	34.71715393	0.211723
10	-0.20984718	9.11172580	-1.91206996		10.00000000	3.43400000	31.28966640	0.233087
11	-0.20007724	9.10030840	-1.82076459		11.00000000	3.12181818	28.40950822	0.254469
12	-0.18989350	9.10517690	-1.72901391		12.00000000	2.86166667	26.05598123	0.275946
13	-0.18010347	9.11028670	-1.64079425		13.00000000	2.64153846	24.06517271	0.297335
14	-0.16998820	9.10602950	-1.54791756		14.00000000	2.45285714	22.33578950	0.318715
15	-0.16015500	9.11059570	-1.45910745		15.00000000	2.28933333	20.85719042	0.340051
16	-0.15003601	9.09868140	-1.36512985		16.00000000	2.14625000	19.52804495	0.361538
17	-0.13985598	9.11997990	-1.27548373		17.00000000	2.02000000	18.42235940	0.382914
18	-0.13006075	9.09064390	-1.18233596		18.00000000	1.90777778	17.34292842	0.404327
19	-0.11985319	9.10658360	-1.09145309		19.00000000	1.80736842	16.45895162	0.425738
20	-0.11008325	9.13147160	-1.00522207		20.00000000	1.71700000	15.67873674	0.447196
21	-0.09991216	9.09557060	-0.90875810		21.00000000	1.63523810	14.87342354	0.468580
22	-0.09010725	9.11207960	-0.82106441		22.00000000	1.56090909	14.22312788	0.489937
23	-0.07993764	9.11423870	-0.72857077		23.00000000	1.49304348	13.60795465	0.511298
24	-0.07014762	9.10358620	-0.63859490		24.00000000	1.43083333	13.02571459	0.532787
25	-0.05996760	9.11511520	-0.54661155		25.00000000	1.37360000	12.52052224	0.554157
26	-0.04983521	9.10282900	-0.45364135		26.00000000	1.32076923	12.02273646	0.575510
27	-0.03999903	9.11220650	-0.36447943		27.00000000	1.27185185	11.58937671	0.596886
28	-0.02985697	9.09304050	-0.27149061		28.00000000	1.22642857	11.15196467	0.618370
29	-0.02008778	9.11055090	-0.18301071		29.00000000	1.18413793	10.78814889	0.639749
30	-0.00991148	9.10221290	-0.09021637		30.00000000	1.14466667	10.41899970	0.661140
31	-0.00063871	9.11452290	-0.00582154		31.00000000	1.10774194	10.09653924	0.682604
32	0.00947859	9.10582070	0.08631031		32.00000000	1.07312500	9.77168384	0.704082
33	0.01931969	9.10889150	0.17598095		33.00000000	1.04060606	9.47876770	0.725451
34	0.02943914	9.09572600	0.26777033		34.00000000	1.01000000	9.18668326	0.746836
35	0.03928322	9.11504170	0.35806815		35.00000000	0.98114286	8.94315806	0.768318
36	0.04942053	9.09727760	0.44959226		36.00000000	0.95388889	8.67779202	0.789710
37	0.05921028	9.11304380	0.53958586		37.00000000	0.92810811	8.45788984	0.811049
38	0.06938405	9.09891030	0.63131927		38.00000000	0.90368421	8.22254157	0.832432
39	0.07952137	9.10316090	0.72389578		39.00000000	0.88051282	8.01544988	0.853915
40	0.08937140	9.10783200	0.81397968		40.00000000	0.85850000	7.81907377	0.875292
41	0.09953922	9.09532360	0.90534142		41.00000000	0.83756098	7.61788811	0.896655
42	0.10934758	9.11628820	0.99684405		42.00000000	0.81761905	7.45365088	0.918031
43	0.11949977	9.11815550	1.08961749		43.00000000	0.79860465	7.28180139	0.939506
44	0.12930739	9.09688380	1.17629430		44.00000000	0.78045455	7.09970431	0.960905
45	0.13946554	9.12016490	1.27194872		45.00000000	0.76311111	6.95969917	0.982258
46	0.14929844	9.10202410	1.35891800		46.00000000	0.74652174	6.79485886	1.003674
47	0.15940972	9.10397340	1.45126185		47.00000000	0.73063830	6.65171163	1.025150
48	0.16956712	9.11210250	1.54511298		48.00000000	0.71541667	6.51895000	1.046527
49	0.17940226	9.10906700	1.63418721		49.00000000	0.70081633	6.38378287	1.067891
50	0.18949418	9.11006160	1.72630365		50.00000000	0.68680000	6.25679031	1.089260
51	0.19931296	9.11151890	1.81604380		51.00000000	0.67333333	6.13508939	1.110737
52	0.20946217	9.10728260	1.90763118		52.00000000	0.66038462	6.01430932	1.132109
53	0.21930550	9.10909560	1.99767477		53.00000000	0.64792453	5.90200647	1.153455
54	0.22941528	9.09743310	2.08709016		54.00000000	0.63592593	5.78529357	1.174837
55	0.23921321	9.10975270	2.17917319		55.00000000	0.62436364	5.68779832	1.196302
56	0.24940039	9.09906010	2.26930914		56.00000000	0.61321429	5.57967364	1.217678
57	0.25950125	9.11350630	2.36496628		57.00000000	0.60245614	5.49048783	1.239038
58	0.26938105	9.11093810	2.45431407		58.00000000	0.59206897	5.39430370	1.260409
59	0.27952430	9.09590240	2.54252575		59.00000000	0.58203390	5.29412353	1.281886
60	0.28932819	9.10493470	2.63431428		60.00000000	0.57233333	5.21105763	1.303249
61	0.29947814	9.10881520	2.72789103		61.00000000	0.56295082	5.12781498	1.324636
62	0.30933934	9.11435220	2.81942769		62.00000000	0.55387097	5.04817507	1.345978
63	0.31946030	9.09210590	2.90456688		63.00000000	0.54507937	4.95591931	1.367442
64	0.32922027	9.10626320	2.99796643		64.00000000	0.53656250	4.88607935	1.388833
65	0.33939925	9.10309890	3.08958494		65.00000000	0.52830769	4.80923717	1.410221
66	0.34924856	9.10129640	3.17861466		66.00000000	0.52030303	4.73543210	1.431709
67	0.35937321	9.10270690	3.27126900		67.00000000	0.51253731	4.66547694	1.453086
68	0.36954847	9.10117630	3.36332578		68.00000000	0.50500000	4.59609403	1.474428
69	0.37934789	9.08992290	3.44824307		69.00000000	0.49768116	4.52388337	1.495811
70	0.38948894	9.11014650	3.54830130		70.00000000	0.49057143	4.46917758	1.517294
71	0.39934045	9.09701730	3.63280698		71.00000000	0.48366197	4.39988133	1.538674
72	0.40949786	9.10903840	3.73013173		72.00000000	0.47694444	4.34450526	1.560035
73	0.41929355	9.10461430	3.81750605		73.00000000	0.47041096	4.28291034	1.581403
74	0.42945021	9.08969970	3.90357345		74.00000000	0.46405405	4.21811200	1.602880
75	0.43927124	9.09452440	3.99496301		75.00000000	0.45786667	4.16407957	1.624259
76	0.44939739	9.09793190	4.08858685		76.00000000	0.45184211	4.11082870	1.645604
77	0.45955849	9.09401700	4.17923272		77.00000000	0.44597403	4.05569537	1.666975
78	0.46945915	9.09365650	4.26910025		78.00000000	0.44025641	4.00354057	1.688461
79	0.47957411	9.07999800	4.35453196		79.00000000	0.43468354	3.94692571	1.709834
80	0.48938024	9.08062360	4.44387776		80.00000000	0.42925000	3.89785768	1.731189
81	0.49951980	9.05323220	4.52226874		81.00000000	0.42395062	3.83812338	1.752563
82	0.50934899	9.06286050	4.61615884		82.00000000	0.41878049	3.79534914	1.774033
83	0.51948106	9.02319530	4.68737906		83.00000000	0.41373494	3.73321116	1.795427
84	0.52924478	9.00300880	4.76479541		84.00000000	0.40880952	3.68051574	1.816784
85	0.53941113	8.95330910	4.82951458		85.00000000	0.40400000	3.61713688	1.838152
86	0.54956853	8.89308170	4.88735784		86.00000000	0.39930233	3.55102820	1.859626
87	0.55936128	8.79989430	4.92232014		87.00000000	0.39471264	3.47342954	1.881002
88	0.56949484	8.68400100	4.94549376		88.00000000	0.39022727	3.38873403	1.902358
89	0.57930690	8.50155740	4.92501086		89.00000000	0.38584270	3.28026383	1.923746
90	0.58944947	8.27152630	4.87564679		90.00000000	0.38155556	3.15604681	1.945217
91	0.59926075	7.94660090	4.76208602		91.00000000	0.37736264	2.99875027	1.966603
92	0.60935640	7.49295520	4.56588021		92.00000000	0.37326087	2.79682697	1.988088
93	0.61915809	6.90161510	4.27319082		93.00000000	0.36924731	2.54840282	2.009449
94	0.62928349	6.11350680	3.84712890		94.00000000	0.36531915	2.23338110	2.030923
95	0.63935602	5.07725520	3.24617368		95.00000000	0.36147368	1.83529414	2.052300
96	0.64917779	3.81741210	2.47817915		96.00000000	0.35770833	1.36552012	2.073676
97	0.65927047	2.19768880	1.44887133		97.00000000	0.35402062	0.77802715	2.095165
98	0.66899544	0.28120837	0.18812712		98.00000000	0.35040816	0.09853771	2.116542
99	0.67909032	-2.07753130	-1.41083140		99.00000000	0.34686869	-0.72063055	2.137887
100	0.68883097	-4.75660370	-3.27649594		100.00000000	0.34340000	-1.63341771	2.159264
101	0.69900846	-8.01884460	-5.60524021		101.00000000	0.34000000	-2.72640716	2.180786
00:58 04/04/2018
Test Lot:	JK-PERC
Recipe:	Recipe_YJX-LID
Cell Name:	3-16-4h
Test Order:	3
Test Condition:	Light
1	-0.29994610	9.11566070	-2.73420688		1.00000000	34.34000000	313.03178844	0.000000
2	-0.29007643	9.10670850	-2.64164149		2.00000000	17.17000000	156.36218495	0.021565
3	-0.27997828	9.11017990	-2.55065250		3.00000000	11.44666667	104.28119259	0.043023
4	-0.27012351	9.11140540	-2.46120481		4.00000000	8.58500000	78.22141536	0.064392
5	-0.26001123	9.10944940	-2.36855914		5.00000000	6.86800000	62.56369848	0.085771
6	-0.24980588	9.12055400	-2.27836802		6.00000000	5.72333333	52.19997073	0.107304
7	-0.24003595	9.10907550	-2.18650559		7.00000000	4.90571429	44.68652181	0.128707
8	-0.22984700	9.09700580	-2.09091949		8.00000000	4.29250000	39.04889740	0.150058
9	-0.22002719	9.11131190	-2.00473635		9.00000000	3.81555556	34.76471674	0.171494
10	-0.20990895	9.10706620	-1.91165470		10.00000000	3.43400000	31.27366533	0.192983
11	-0.20004673	9.11081410	-1.82258857		11.00000000	3.12181818	28.44230511	0.214355
12	-0.18989797	9.10415840	-1.72886120		12.00000000	2.86166667	26.05306662	0.235709
13	-0.18010943	9.10162070	-1.63928772		13.00000000	2.64153846	24.04228114	0.257090
14	-0.16997108	9.11502170	-1.54929008		14.00000000	2.45285714	22.35784608	0.278560
15	-0.16014235	9.10201450	-1.45761799		15.00000000	2.28933333	20.83754520	0.299947
16	-0.14999805	9.09902190	-1.36483554		16.00000000	2.14625000	19.52877575	0.321280
17	-0.13984407	9.11623290	-1.27485111		17.00000000	2.02000000	18.41479046	0.342657
18	-0.13002650	9.10806560	-1.18428989		18.00000000	1.90777778	17.37616515	0.364142
19	-0.11985840	9.09992500	-1.09070245		19.00000000	1.80736842	16.44691708	0.385514
20	-0.11005571	9.11924550	-1.00362504		20.00000000	1.71700000	15.65774452	0.406884
21	-0.09992035	9.10935210	-0.91020962		21.00000000	1.63523810	14.89595958	0.428265
22	-0.09012586	9.11413190	-0.82141897		22.00000000	1.56090909	14.22633134	0.449735
23	-0.07998900	9.10552880	-0.72834215		23.00000000	1.49304348	13.59495039	0.471128
24	-0.07014167	9.10391520	-0.63856378		24.00000000	1.43083333	13.02618533	0.492477
25	-0.05998248	9.10192390	-0.54595596		25.00000000	1.37360000	12.50240267	0.513843
26	-0.04985679	9.09793850	-0.45359400		26.00000000	1.32076923	12.01627723	0.535340
27	-0.04001541	9.10843470	-0.36447772		27.00000000	1.27185185	11.58457954	0.556715
28	-0.02988153	9.12281890	-0.27260377		28.00000000	1.22642857	11.18848575	0.578062
29	-0.02004982	9.09106160	-0.18227415		29.00000000	1.18413793	10.76507087	0.599435
30	-0.00993753	9.09956740	-0.09042718		30.00000000	1.14466667	10.41597148	0.620913
31	-0.00066253	9.09853270	-0.00602802		31.00000000	1.10774194	10.07882622	0.642425
32	0.00943840	9.11836430	0.08606275		32.00000000	1.07312500	9.78514469	0.663819
33	0.01929066	9.10625650	0.17566573		33.00000000	1.04060606	9.47602570	0.685164
34	0.02943170	9.10884000	0.26808860		34.00000000	1.01000000	9.19992840	0.706628
35	0.03926015	9.10165210	0.35733218		35.00000000	0.98114286	8.93002095	0.728000
36	0.04941606	9.11337090	0.45034689		36.00000000	0.95388889	8.69314324	0.749378
37	0.05923186	9.10226820	0.53914427		37.00000000	0.92810811	8.44788892	0.770827
38	0.06938629	9.11626340	0.63254369		38.00000000	0.90368421	8.23822329	0.792297
39	0.07953253	9.11051080	0.72458194		39.00000000	0.88051282	8.02192156	0.813660
40	0.08937140	9.10122970	0.81338962		40.00000000	0.85850000	7.81340570	0.835030
41	0.09948787	9.11165240	0.90649890		41.00000000	0.83756098	7.63156447	0.856393
42	0.10931111	9.09873680	0.99459302		42.00000000	0.81761905	7.43930052	0.877877
43	0.11947224	9.11110120	1.08852367		43.00000000	0.79860465	7.27616780	0.899272
44	0.12927613	9.11404900	1.17822898		44.00000000	0.78045455	7.11310097	0.920644
45	0.13946778	9.10747340	1.27019910		45.00000000	0.76311111	6.95001415	0.942014
46	0.14927761	9.09730430	1.35802384		46.00000000	0.74652174	6.79133543	0.963500
47	0.15941715	9.10890200	1.45211520		47.00000000	0.73063830	6.65531265	0.984866
48	0.16955522	9.10472770	1.54375411		48.00000000	0.71541667	6.51367394	1.006252
49	0.17938590	9.11746980	1.63554553		49.00000000	0.70081633	6.38967169	1.027605
50	0.18952842	9.10462090	1.72558441		50.00000000	0.68680000	6.25305363	1.049078
51	0.19929732	9.12092970	1.81777685		51.00000000	0.67333333	6.14142600	1.070473
52	0.20945920	9.09939770	1.90595256		52.00000000	0.66038462	6.00910225	1.091854
53	0.21929063	9.09285160	1.99397716		53.00000000	0.64792453	5.89148158	1.113334
54	0.22939891	9.11194230	2.09026963		54.00000000	0.63592593	5.79452034	1.134719
55	0.23922661	9.10366630	2.17783923		55.00000000	0.62436364	5.68399820	1.156078
56	0.24938551	9.10813900	2.27143789		56.00000000	0.61321429	5.58524095	1.177451
57	0.25953099	9.10196590	2.36224222		57.00000000	0.60245614	5.48353525	1.198929
58	0.26931778	9.09271810	2.44883065		58.00000000	0.59206897	5.38351620	1.220305
59	0.27951092	9.12037180	2.54924351		59.00000000	0.58203390	5.30836555	1.241666
60	0.28931853	9.11074070	2.63590611		60.00000000	0.57233333	5.21438059	1.263049
61	0.29945210	9.10620500	2.72687221		61.00000000	0.56295082	5.12634557	1.284523
62	0.30929917	9.10586930	2.81643782		62.00000000	0.55387097	5.04347664	1.305906
63	0.31943423	9.10877800	2.90965549		63.00000000	0.54507937	4.96500693	1.327257
64	0.32927907	9.10422040	2.99782923		64.00000000	0.53656250	4.88498326	1.348629
65	0.33941042	9.10397340	3.08998344		65.00000000	0.52830769	4.80969918	1.370115
66	0.34921879	9.10564900	3.17986373		66.00000000	0.52030303	4.73769677	1.391487
67	0.35937992	9.10530660	3.27226436		67.00000000	0.51253731	4.66680938	1.412848
68	0.36955965	9.10693930	3.36555730		68.00000000	0.50500000	4.59900435	1.434234
69	0.37935162	9.10599610	3.45437437		69.00000000	0.49768116	4.53188270	1.455708
70	0.38949192	9.10032370	3.54450255		70.00000000	0.49057143	4.46435880	1.477079
71	0.39934641	9.10914520	3.63770443		71.00000000	0.48366197	4.40574713	1.498431
72	0.40947255	9.09525490	3.72425722		72.00000000	0.47694444	4.33793130	1.519807
73	0.41931811	9.10821720	3.81924042		73.00000000	0.47041096	4.28460519	1.541294
74	0.42947105	9.10571380	3.91064047		74.00000000	0.46405405	4.22554340	1.562679
75	0.43926156	9.09544850	3.99528090		75.00000000	0.45786667	4.16450269	1.584041
76	0.44940406	9.09226130	4.08609914		76.00000000	0.45184211	4.10826649	1.605412
77	0.45955849	9.10228820	4.18303382		77.00000000	0.44597403	4.05938411	1.626881
78	0.46941301	9.08467100	4.26446276		78.00000000	0.44025641	3.99958464	1.648261
79	0.47957709	9.09284690	4.36072106		79.00000000	0.43468354	3.95251092	1.669654
80	0.48937353	9.08547880	4.44619283		80.00000000	0.42925000	3.89994177	1.691002
81	0.49951309	9.06004330	4.52561022		81.00000000	0.42395062	3.84101095	1.712458
82	0.50931996	9.04417510	4.60637890		82.00000000	0.41878049	3.78752406	1.733839
83	0.51947957	9.01684190	4.68406515		83.00000000	0.41373494	3.73058254	1.755257
84	0.52927381	8.99385830	4.76021365		84.00000000	0.40880952	3.67677493	1.776735
85	0.53938133	8.94730090	4.82600706		85.00000000	0.40400000	3.61470956	1.798132
86	0.54954022	8.87911130	4.87942878		86.00000000	0.39930233	3.54544979	1.819478
87	0.55935532	8.81942370	4.93319157		87.00000000	0.39471264	3.48113804	1.840858
88	0.56946582	8.67559430	4.94045442		88.00000000	0.39022727	3.38545350	1.862336
89	0.57930171	8.50190070	4.92516561		89.00000000	0.38584270	3.28039629	1.883700
90	0.58941746	8.26866820	4.87369741		90.00000000	0.38155556	3.15495629	1.905071
91	0.59920126	7.93968010	4.75746632		91.00000000	0.37736264	2.99613862	1.926455
92	0.60934526	7.48119260	4.55862925		92.00000000	0.37326087	2.79243646	1.947927
93	0.61914092	6.90167050	4.27310662		93.00000000	0.36924731	2.54842328	1.969308
94	0.62925369	6.09054850	3.83250012		94.00000000	0.36531915	2.22499399	1.990762
95	0.63936198	5.06914420	3.24101807		95.00000000	0.36147368	1.83236223	2.012165
96	0.64915693	3.80205320	2.46812918		96.00000000	0.35770833	1.36002611	2.033673
97	0.65926671	2.18172000	1.43833537		97.00000000	0.35402062	0.77237386	2.055055
98	0.66896123	0.26637229	0.17819273		98.00000000	0.35040816	0.09333902	2.076394
99	0.67907989	-2.08232210	-1.41406306		99.00000000	0.34686869	-0.72229233	2.097774
100	0.68879968	-4.76398040	-3.28142818		100.00000000	0.34340000	-1.63595087	2.119263
101	0.69897127	-8.01404760	-5.60158903		101.00000000	0.34000000	-2.72477618	2.140699
00:58 04/04/2018
Test Lot:	JK-PERC
Recipe:	Recipe_YJX-LID
Cell Name:	3-16-4h
Test Order:	4
Test Condition:	Light
1	-0.29988313	9.12042430	-2.73506139		1.00000000	34.34000000	313.19537046	0.000000
2	-0.29009742	9.11156940	-2.64324278		2.00000000	17.17000000	156.44564660	0.061794
3	-0.27999389	9.11594490	-2.55240887		3.00000000	11.44666667	104.34718262	0.083222
4	-0.27013075	9.10285280	-2.45896045		4.00000000	8.58500000	78.14799129	0.104780
5	-0.25998035	9.11257080	-2.36908935		5.00000000	6.86800000	62.58513625	0.126170
6	-0.24983068	9.10671140	-2.27513590		6.00000000	5.72333333	52.12074491	0.147510
7	-0.24001817	9.11051650	-2.18668950		7.00000000	4.90571429	44.69359094	0.168886
8	-0.22984022	9.11050610	-2.09396073		8.00000000	4.29250000	39.10684743	0.190381
9	-0.22005600	9.10920810	-2.00453590		9.00000000	3.81555556	34.75668957	0.211796
10	-0.20987730	9.11092190	-1.91217569		10.00000000	3.43400000	31.28690580	0.233207
11	-0.20007148	9.11143400	-1.82293809		11.00000000	3.12181818	28.44424032	0.254568
12	-0.18989652	9.11364750	-1.73064994		12.00000000	2.86166667	26.08022126	0.276042
13	-0.18012643	9.10517410	-1.64008251		13.00000000	2.64153846	24.05166758	0.297422
14	-0.16997750	9.10523410	-1.54768493		14.00000000	2.45285714	22.33383850	0.318802
15	-0.16019253	9.10177330	-1.45803609		15.00000000	2.28933333	20.83699301	0.340162
16	-0.15000565	9.12596040	-1.36894562		16.00000000	2.14625000	19.58659251	0.361653
17	-0.13986194	9.10771560	-1.27382277		17.00000000	2.02000000	18.39758551	0.383024
18	-0.13004869	9.11066340	-1.18482984		18.00000000	1.90777778	17.38112118	0.404414
19	-0.11990051	9.11334040	-1.09269416		19.00000000	1.80736842	16.47116365	0.425900
20	-0.11006269	9.10917760	-1.00258059		20.00000000	1.71700000	15.64045794	0.447287
21	-0.09988028	9.09722040	-0.90863290		21.00000000	1.63523810	14.87612136	0.468663
22	-0.09010647	9.11920450	-0.82169928		22.00000000	1.56090909	14.23424921	0.490038
23	-0.07990842	9.11555480	-0.72840961		23.00000000	1.49304348	13.60991964	0.511508
24	-0.07013908	9.11093330	-0.63903248		24.00000000	1.43083333	13.03622706	0.532879
25	-0.05995741	9.11289980	-0.54638584		25.00000000	1.37360000	12.51747917	0.554219
26	-0.04981890	9.09897610	-0.45330101		26.00000000	1.32076923	12.01764766	0.575599
27	-0.03997960	9.11439130	-0.36438971		27.00000000	1.27185185	11.59215545	0.597092
28	-0.02983812	9.10805320	-0.27176719		28.00000000	1.22642857	11.17037667	0.618467
29	-0.02003082	9.09359070	-0.18215207		29.00000000	1.18413793	10.76806568	0.639827
30	-0.00989604	9.10303970	-0.09008402		30.00000000	1.14466667	10.41994611	0.661197
31	-0.00064173	9.10464670	-0.00584274		31.00000000	1.10774194	10.08559896	0.682796
32	0.00950326	9.10399910	0.08651768		32.00000000	1.07312500	9.76972903	0.704185
33	0.01932740	9.10055450	0.17589006		33.00000000	1.04060606	9.47009217	0.725545
34	0.02946636	9.10331340	0.26824150		34.00000000	1.01000000	9.19434653	0.746917
35	0.03929794	9.09858230	0.35755556		35.00000000	0.98114286	8.92700903	0.768404
36	0.04941308	9.10935970	0.45012153		36.00000000	0.95388889	8.68931700	0.789786
37	0.05924243	9.10261060	0.53926078		37.00000000	0.92810811	8.44820670	0.811148
38	0.06941563	9.09952550	0.63164929		38.00000000	0.90368421	8.22309752	0.832521
39	0.07953598	9.11577130	0.72503177		39.00000000	0.88051282	8.02655350	0.854011
40	0.08936831	9.10001280	0.81325273		40.00000000	0.85850000	7.81236099	0.875410
41	0.09954969	9.10187150	0.90608847		41.00000000	0.83756098	7.62337237	0.896815
42	0.10931652	9.10755060	0.99560574		42.00000000	0.81761905	7.44650685	0.918172
43	0.11948004	9.11280920	1.08879881		43.00000000	0.79860465	7.27753181	0.939654
44	0.12930864	9.10350700	1.17716211		44.00000000	0.78045455	7.10487342	0.961032
45	0.13947216	9.10190010	1.26946167		45.00000000	0.76311111	6.94576110	0.982420
46	0.14926876	9.10642620	1.35930495		46.00000000	0.74652174	6.79814512	1.003784
47	0.15938540	9.09350680	1.44937222		47.00000000	0.73063830	6.64406433	1.025265
48	0.16953179	9.11541750	1.54535305		48.00000000	0.71541667	6.52132160	1.046648
49	0.17936859	9.09888740	1.63205460		49.00000000	0.70081633	6.37664884	1.068042
50	0.18948670	9.11137390	1.72648417		50.00000000	0.68680000	6.25769159	1.089536
51	0.19929521	9.10786630	1.81515413		51.00000000	0.67333333	6.13262998	1.110918
52	0.20945352	9.10915090	1.90794372		52.00000000	0.66038462	6.01554311	1.132273
53	0.21929255	9.09746930	1.99500724		53.00000000	0.64792453	5.89447350	1.153643
54	0.22944342	9.10735700	2.08962314		54.00000000	0.63592593	5.79160443	1.175129
55	0.23924150	9.09787270	2.17658871		55.00000000	0.62436364	5.68038088	1.196517
56	0.24942066	9.11000540	2.27222356		56.00000000	0.61321429	5.58638545	1.217875
57	0.25956854	9.10094830	2.36231986		57.00000000	0.60245614	5.48292219	1.239258
58	0.26940086	9.11199470	2.45477921		58.00000000	0.59206897	5.39492928	1.260747
59	0.27953386	9.10420320	2.54493306		59.00000000	0.58203390	5.29895488	1.282126
60	0.28934908	9.09747220	2.63234521		60.00000000	0.57233333	5.20678659	1.303498
61	0.29948953	9.10438350	2.72666754		61.00000000	0.56295082	5.12532015	1.324865
62	0.30933005	9.10240360	2.81564696		62.00000000	0.55387097	5.04155709	1.346339
63	0.31946155	9.09817500	2.90651709		63.00000000	0.54507937	4.95922745	1.367733
64	0.32929239	9.11385730	3.00112385		64.00000000	0.53656250	4.89015406	1.389085
65	0.33940157	9.10405640	3.08993104		65.00000000	0.52830769	4.80974303	1.410477
66	0.34927484	9.10547640	3.18031381		66.00000000	0.52030303	4.73760696	1.431953
67	0.35941827	9.09904290	3.27036226		67.00000000	0.51253731	4.66359900	1.453332
68	0.36956465	9.09065530	3.35958484		68.00000000	0.50500000	4.59078093	1.474705
69	0.37937838	9.11707310	3.45882042		69.00000000	0.49768116	4.53739551	1.496085
70	0.38951659	9.09736540	3.54357475		70.00000000	0.49057143	4.46290754	1.517573
71	0.39935189	9.11000920	3.63809939		71.00000000	0.48366197	4.40616501	1.538962
72	0.40948340	9.09015460	3.72226741		72.00000000	0.47694444	4.33549874	1.560325
73	0.41932467	9.09803490	3.81503048		73.00000000	0.47041096	4.27981532	1.581691
74	0.42945620	9.10094360	3.90845665		74.00000000	0.46405405	4.22332977	1.603166
75	0.43923789	9.09644600	3.99550375		75.00000000	0.45786667	4.16495941	1.624541
76	0.44941929	9.09351730	4.08680209		76.00000000	0.45184211	4.10883400	1.645925
77	0.45958355	9.09455870	4.17970957		77.00000000	0.44597403	4.05593696	1.667283
78	0.46943372	9.08565040	4.26511067		78.00000000	0.44025641	4.00001583	1.688762
79	0.47954962	9.07793330	4.35331946		79.00000000	0.43468354	3.94602822	1.710136
80	0.48939684	9.07550810	4.44152499		80.00000000	0.42925000	3.89566185	1.731529
81	0.49954250	9.06330870	4.52750789		81.00000000	0.42395062	3.84239532	1.753018
82	0.50934875	9.05988410	4.61464064		82.00000000	0.41878049	3.79410268	1.774417
83	0.51945347	9.02846150	4.68986565		83.00000000	0.41373494	3.73538997	1.795770
84	0.52926868	8.99439430	4.76045120		84.00000000	0.40880952	3.67699405	1.817141
85	0.53939205	8.95311160	4.82923722		85.00000000	0.40400000	3.61705709	1.838632
86	0.54957265	8.89794540	4.89006743		86.00000000	0.39930233	3.55297029	1.860017
87	0.55937970	8.80390260	4.92472440		87.00000000	0.39471264	3.47501167	1.881369
88	0.56950825	8.68753810	4.94762462		88.00000000	0.39022727	3.39011430	1.902759
89	0.57933313	8.51794240	4.93472623		89.00000000	0.38584270	3.28658587	1.924231
90	0.58944231	8.28159810	4.88152431		90.00000000	0.38155556	3.15988976	1.945606
91	0.59924036	7.94156840	4.75890831		91.00000000	0.37736264	2.99685120	1.966967
92	0.60935253	7.50596050	4.57377602		92.00000000	0.37326087	2.80168134	1.988448
93	0.61916625	6.91252950	4.28000497		93.00000000	0.36924731	2.55243294	2.009948
94	0.62927693	6.13208100	3.85877711		94.00000000	0.36531915	2.24016661	2.031343
95	0.63941813	5.07737490	3.24656556		95.00000000	0.36147368	1.83533741	2.052691
96	0.64919388	3.83165240	2.48748529		96.00000000	0.35770833	1.37061399	2.074078
97	0.65928745	2.19748140	1.44877191		97.00000000	0.35402062	0.77795372	2.095572
98	0.66901112	0.28064567	0.18775507		98.00000000	0.35040816	0.09834053	2.116998
99	0.67913151	-2.10917430	-1.43240673		99.00000000	0.34686869	-0.73160652	2.138372
100	0.68882388	-4.82577040	-3.32410589		100.00000000	0.34340000	-1.65716956	2.159754
101	0.69906032	-8.13166430	-5.68452385		101.00000000	0.34000000	-2.76476586	2.181237
