# Supplementary material for: Study on the Electrical Injection Regeneration of Industrialized B-Doped Czochralski Silicon PERC Solar Cells
Source: Hindawi journal article supplement (doi:10.1155/2019/5357370), 2019-06-20
Supplement: f1 [file 5357370.f1.zip › section3.3/IVRawData_3-16-5h.csv]

01:58 04/04/2018
Test Lot:	JK-PERC
Recipe:	Recipe_YJX-LID
Cell Name:	3-16-5h
Test Order:	2
Test Condition:	Light
1	-0.29990044	9.11714080	-2.73423454		1.00000000	34.34000000	313.08261507	0.000000
2	-0.29010007	9.11692710	-2.64482119		2.00000000	17.17000000	156.53763831	0.061812
3	-0.27993646	9.11177350	-2.55071762		3.00000000	11.44666667	104.29943400	0.083245
4	-0.27017328	9.11803340	-2.46344899		4.00000000	8.58500000	78.27831674	0.104742
5	-0.25996727	9.11060520	-2.36845916		5.00000000	6.86800000	62.57163651	0.126118
6	-0.24978359	9.10731120	-2.27485689		6.00000000	5.72333333	52.12417777	0.147517
7	-0.23999958	9.11298370	-2.18711226		7.00000000	4.90571429	44.70569432	0.168887
8	-0.22981514	9.12486460	-2.09703204		8.00000000	4.29250000	39.16848130	0.190376
9	-0.22004601	9.10939410	-2.00448583		9.00000000	3.81555556	34.75739927	0.211745
10	-0.20986605	9.11043170	-1.91197031		10.00000000	3.43400000	31.28522246	0.233132
11	-0.20005077	9.11231140	-1.82292491		11.00000000	3.12181818	28.44697941	0.254487
12	-0.18989909	9.11452580	-1.73084016		12.00000000	2.86166667	26.08273466	0.275958
13	-0.18015750	9.11176680	-1.64155313		13.00000000	2.64153846	24.06908245	0.297333
14	-0.16996786	9.10850910	-1.54815380		14.00000000	2.45285714	22.34187161	0.318715
15	-0.16015184	9.11435410	-1.45968058		15.00000000	2.28933333	20.86579465	0.340213
16	-0.14997485	9.11497500	-1.36701701		16.00000000	2.14625000	19.56301509	0.361595
17	-0.13984624	9.11244300	-1.27434089		17.00000000	2.02000000	18.40713486	0.382938
18	-0.13002723	9.11067580	-1.18463594		18.00000000	1.90777778	17.38114483	0.404319
19	-0.11991649	9.11687560	-1.09326372		19.00000000	1.80736842	16.47755306	0.425796
20	-0.11008782	9.12251660	-1.00427797		20.00000000	1.71700000	15.66336100	0.447177
21	-0.09992869	9.11561390	-0.91091137		21.00000000	1.63523810	14.90619911	0.468544
22	-0.09009183	9.11380670	-0.82107954		22.00000000	1.56090909	14.22582373	0.489915
23	-0.07999300	9.10960580	-0.72870465		23.00000000	1.49304348	13.60103753	0.511392
24	-0.07014646	9.11617660	-0.63946748		24.00000000	1.43083333	13.04372935	0.532782
25	-0.06000147	9.10641290	-0.54639820		25.00000000	1.37360000	12.50856876	0.554137
26	-0.04984012	9.12223430	-0.45465321		26.00000000	1.32076923	12.04836638	0.575560
27	-0.04003451	9.10311220	-0.36443867		27.00000000	1.27185185	11.57781011	0.597050
28	-0.02989697	9.12061410	-0.27267875		28.00000000	1.22642857	11.18578172	0.618422
29	-0.02007574	9.11515810	-0.18299354		29.00000000	1.18413793	10.79360445	0.639779
30	-0.00993001	9.12983130	-0.09065935		30.00000000	1.14466667	10.45061356	0.661157
31	-0.00067963	9.12046340	-0.00619852		31.00000000	1.10774194	10.10311978	0.682747
32	0.00947929	9.11455730	0.08639952		32.00000000	1.07312500	9.78105930	0.704148
33	0.01926601	9.11032490	0.17551957		33.00000000	1.04060606	9.48025931	0.725503
34	0.02944642	9.11497500	0.26840341		34.00000000	1.01000000	9.20612475	0.746879
35	0.03923463	9.10384650	0.35718602		35.00000000	0.98114286	8.93217397	0.768418
36	0.04940239	9.11490630	0.45029818		36.00000000	0.95388889	8.69460784	0.789810
37	0.05920028	9.12436390	0.54016486		37.00000000	0.92810811	8.46839612	0.811207
38	0.06938367	9.10710430	0.63188428		38.00000000	0.90368421	8.22994636	0.832577
39	0.07953730	9.12732980	0.72596312		39.00000000	0.88051282	8.03673091	0.854052
40	0.08935527	9.11451910	0.81443030		40.00000000	0.85850000	7.82481465	0.875439
41	0.09951261	9.11073590	0.90663314		41.00000000	0.83756098	7.63079685	0.896816
42	0.10934101	9.11495780	0.99663869		42.00000000	0.81761905	7.45256312	0.918170
43	0.11948942	9.11603640	1.08926990		43.00000000	0.79860465	7.28010907	0.939639
44	0.12931708	9.12456890	1.17996261		44.00000000	0.78045455	7.12131127	0.961011
45	0.13945730	9.10291000	1.26946725		45.00000000	0.76311111	6.94653176	0.982411
46	0.14925964	9.12375640	1.36180860		46.00000000	0.74652174	6.81108250	1.003912
47	0.15940137	9.10262970	1.45097164		47.00000000	0.73063830	6.65072987	1.025293
48	0.16956168	9.11564730	1.54566447		48.00000000	0.71541667	6.52148601	1.046651
49	0.17937893	9.11361980	1.63479137		49.00000000	0.70081633	6.38697355	1.068035
50	0.18953106	9.12660030	1.72977423		50.00000000	0.68680000	6.26814909	1.089512
51	0.19931851	9.10683730	1.81516124		51.00000000	0.67333333	6.13193712	1.110881
52	0.20945428	9.11735630	1.90966930		52.00000000	0.66038462	6.02096183	1.132244
53	0.21926555	9.10991290	1.99749006		53.00000000	0.64792453	5.90253602	1.153613
54	0.22945267	9.11512180	2.09148903		54.00000000	0.63592593	5.79654227	1.175094
55	0.23927139	9.10912040	2.17955190		55.00000000	0.62436364	5.68740354	1.196471
56	0.24939823	9.11039350	2.27211601		56.00000000	0.61321429	5.58662344	1.217831
57	0.25953844	9.12339400	2.36787145		57.00000000	0.60245614	5.49644474	1.239221
58	0.26932293	9.09904190	2.45058062		58.00000000	0.59206897	5.38726032	1.260699
59	0.27951080	9.11755280	2.54845448		59.00000000	0.58203390	5.30672480	1.282081
60	0.28931984	9.10785870	2.63508422		60.00000000	0.57233333	5.21273113	1.303445
61	0.29946899	9.11123660	2.72853282		61.00000000	0.56295082	5.12917811	1.324829
62	0.30931452	9.10056020	2.81493541		62.00000000	0.55387097	5.04053608	1.346318
63	0.31942943	9.10441400	2.90821777		63.00000000	0.54507937	4.96262820	1.367716
64	0.32924816	9.12572100	3.00462685		64.00000000	0.53656250	4.89651967	1.389072
65	0.33943006	9.11564730	3.09412471		65.00000000	0.52830769	4.81586659	1.410447
66	0.34924209	9.10745810	3.18070770		66.00000000	0.52030303	4.73863805	1.431927
67	0.35935178	9.11431030	3.27524363		67.00000000	0.51253731	4.67142411	1.453304
68	0.36955827	9.11018660	3.36674480		68.00000000	0.50500000	4.60064423	1.474686
69	0.37934795	9.10354900	3.45341265		69.00000000	0.49768116	4.53066482	1.496059
70	0.38948148	9.10779190	3.54731627		70.00000000	0.49057143	4.46802248	1.517534
71	0.39932030	9.10936740	3.63755532		71.00000000	0.48366197	4.40585460	1.538938
72	0.40947691	9.10736270	3.72925474		72.00000000	0.47694444	4.34370604	1.560320
73	0.41928968	9.11018850	3.81980802		73.00000000	0.47041096	4.28553251	1.581672
74	0.42944032	9.10086440	3.90827812		74.00000000	0.46405405	4.22329302	1.603161
75	0.43925160	9.11191080	4.00242140		75.00000000	0.45786667	4.17204022	1.624532
76	0.44945732	9.09857460	4.08942096		76.00000000	0.45184211	4.11111910	1.645914
77	0.45956928	9.10027030	4.18220467		77.00000000	0.44597403	4.05848418	1.667407
78	0.46939245	9.08287140	4.26343126		78.00000000	0.44025641	3.99879236	1.688779
79	0.47957137	9.09608750	4.36222314		79.00000000	0.43468354	3.95391955	1.710126
80	0.48938414	9.08299540	4.44507389		80.00000000	0.42925000	3.89887578	1.731510
81	0.49953181	9.05867390	4.52509577		81.00000000	0.42395062	3.84043039	1.752991
82	0.50933564	9.06498620	4.61712055		82.00000000	0.41878049	3.79623934	1.774388
83	0.51947290	9.01315980	4.68209226		83.00000000	0.41373494	3.72905913	1.795751
84	0.52925146	9.01748370	4.77251641		84.00000000	0.40880952	3.68643322	1.817130
85	0.53939164	8.94904040	4.82703758		85.00000000	0.40400000	3.61541232	1.838593
86	0.54955345	8.87966250	4.87984916		86.00000000	0.39930233	3.54566989	1.859966
87	0.55934685	8.78582950	4.91432606		87.00000000	0.39471264	3.46787799	1.881318
88	0.56947815	8.66346360	4.93365322		88.00000000	0.39022727	3.38071977	1.902706
89	0.57931250	8.47587590	4.91018086		89.00000000	0.38584270	3.27035481	1.924177
90	0.58942968	8.21665950	4.84314298		90.00000000	0.38155556	3.13511208	1.945545
91	0.59920597	7.88953210	4.72745473		91.00000000	0.37736264	2.97721464	1.966910
92	0.60936928	7.40939570	4.51505812		92.00000000	0.37326087	2.76563748	1.988400
93	0.61914039	6.80914120	4.21581434		93.00000000	0.36924731	2.51425708	2.009920
94	0.62926126	5.99140550	3.77015937		94.00000000	0.36531915	2.18877516	2.031374
95	0.63935685	4.95543810	3.16829329		95.00000000	0.36147368	1.79126047	2.052742
96	0.64914280	3.71250840	2.40994810		96.00000000	0.35770833	1.32799519	2.074141
97	0.65924656	2.11439440	1.39390723		97.00000000	0.35402062	0.74853921	2.095625
98	0.66898715	0.25918028	0.17338828		98.00000000	0.35040816	0.09081889	2.117000
99	0.67905962	-1.99066010	-1.35177689		99.00000000	0.34686869	-0.69049765	2.138414
100	0.68880689	-4.53009460	-3.12036037		100.00000000	0.34340000	-1.55563449	2.159776
101	0.69895458	-7.56308790	-5.28625493		101.00000000	0.34000000	-2.57144989	2.181263
01:58 04/04/2018
Test Lot:	JK-PERC
Recipe:	Recipe_YJX-LID
Cell Name:	3-16-5h
Test Order:	3
Test Condition:	Light
1	-0.29994735	9.12920860	-2.73828193		1.00000000	34.34000000	313.49702332	0.000000
2	-0.29009336	9.09930520	-2.63964802		2.00000000	17.17000000	156.23507028	0.021591
3	-0.27996624	9.12813380	-2.55556930		3.00000000	11.44666667	104.48670490	0.042984
4	-0.27013981	9.11048890	-2.46110574		4.00000000	8.58500000	78.21354721	0.064336
5	-0.26003054	9.10554500	-2.36771978		5.00000000	6.86800000	62.53688306	0.085761
6	-0.24982527	9.11761470	-2.27781055		6.00000000	5.72333333	52.18314813	0.107259
7	-0.24004944	9.11653710	-2.18841963		7.00000000	4.90571429	44.72312629	0.128639
8	-0.22984938	9.12061880	-2.09636858		8.00000000	4.29250000	39.15025620	0.150024
9	-0.22001997	9.10967060	-2.00430945		9.00000000	3.81555556	34.75845427	0.171375
10	-0.20990103	9.11830900	-1.91394245		10.00000000	3.43400000	31.31227311	0.192849
11	-0.20005822	9.11606120	-1.82374298		11.00000000	3.12181818	28.45868560	0.214219
12	-0.18993853	9.10953430	-1.73025155		12.00000000	2.86166667	26.06845066	0.235594
13	-0.18013516	9.11596580	-1.64210596		13.00000000	2.64153846	24.08017427	0.257014
14	-0.17001548	9.11174680	-1.54913801		14.00000000	2.45285714	22.34981322	0.278482
15	-0.16016300	9.10266490	-1.45791012		15.00000000	2.28933333	20.83903418	0.299846
16	-0.15001355	9.12084100	-1.36824974		16.00000000	2.14625000	19.57560500	0.321248
17	-0.13985071	9.10857960	-1.27384132		17.00000000	2.02000000	18.39933079	0.342618
18	-0.13003840	9.11898330	-1.18581800		18.00000000	1.90777778	17.39699370	0.364102
19	-0.11994031	9.12707230	-1.09470388		19.00000000	1.80736842	16.49598225	0.385498
20	-0.11009675	9.12097260	-1.00418944		20.00000000	1.71700000	15.66070995	0.406852
21	-0.09997037	9.11624810	-0.91135470		21.00000000	1.63523810	14.90723618	0.428250
22	-0.09014170	9.12140660	-0.82221909		22.00000000	1.56090909	14.23768648	0.449736
23	-0.07998555	9.11151700	-0.72878972		23.00000000	1.49304348	13.60389103	0.471120
24	-0.07016358	9.11254120	-0.63936850		24.00000000	1.43083333	13.03852770	0.492508
25	-0.06000668	9.11661340	-0.54705772		25.00000000	1.37360000	12.52258017	0.513866
26	-0.04985054	9.11249450	-0.45426273		26.00000000	1.32076923	12.03550235	0.535338
27	-0.04002930	9.11531830	-0.36487983		27.00000000	1.27185185	11.59333446	0.556711
28	-0.02991186	9.11031530	-0.27250645		28.00000000	1.22642857	11.17315098	0.578096
29	-0.02008095	9.12291340	-0.18319677		29.00000000	1.18413793	10.80278780	0.599578
30	-0.00993894	9.11178870	-0.09056156		30.00000000	1.14466667	10.42996080	0.620951
31	-0.00067367	9.11550050	-0.00614088		31.00000000	1.10774194	10.09762217	0.642423
32	0.00946887	9.11485770	0.08630740		32.00000000	1.07312500	9.78138167	0.663811
33	0.01928461	9.10948090	0.17567280		33.00000000	1.04060606	9.47938103	0.685296
34	0.02943824	9.11912160	0.26845086		34.00000000	1.01000000	9.21031282	0.706673
35	0.03925696	9.11810870	0.35794919		35.00000000	0.98114286	8.94616722	0.728011
36	0.04943663	9.11122320	0.45042816		36.00000000	0.95388889	8.69109457	0.749397
37	0.05924791	9.10935400	0.53971016		37.00000000	0.92810811	8.45446531	0.770880
38	0.06939558	9.12392810	0.63316027		38.00000000	0.90368421	8.24514976	0.792259
39	0.07953953	9.10835550	0.72447432		39.00000000	0.88051282	8.02002379	0.813611
40	0.08934262	9.11243630	0.81412890		40.00000000	0.85850000	7.82302656	0.834982
41	0.09951708	9.10827260	0.90642867		41.00000000	0.83756098	7.62873368	0.856462
42	0.10933580	9.10704040	0.99572555		42.00000000	0.81761905	7.44608970	0.877844
43	0.11947528	9.13850980	1.09182602		43.00000000	0.79860465	7.29805643	0.899196
44	0.12929921	9.10821250	1.17768468		44.00000000	0.78045455	7.10854585	0.920575
45	0.13944092	9.10979270	1.27027788		45.00000000	0.76311111	6.95178403	0.942053
46	0.14925964	9.12022690	1.36128178		46.00000000	0.74652174	6.80844765	0.963442
47	0.15938872	9.11010840	1.45204852		47.00000000	0.73063830	6.65619409	0.984802
48	0.16954309	9.12029650	1.54628325		48.00000000	0.71541667	6.52481212	1.006173
49	0.17935957	9.10556220	1.63316972		49.00000000	0.70081633	6.38132665	1.027643
50	0.18952288	9.11333560	1.72718561		50.00000000	0.68680000	6.25903889	1.049023
51	0.19929768	9.11361310	1.81632195		51.00000000	0.67333333	6.13649949	1.070389
52	0.20941558	9.10438540	1.90660015		52.00000000	0.66038462	6.01239605	1.091761
53	0.21924993	9.11725430	1.99895737		53.00000000	0.64792453	5.90729269	1.113235
54	0.22939463	9.11270520	2.09040564		54.00000000	0.63592593	5.79500549	1.134629
55	0.23923492	9.11762330	2.18125388		55.00000000	0.62436364	5.69271244	1.156023
56	0.24937515	9.10935020	2.27164557		56.00000000	0.61321429	5.58598368	1.177369
57	0.25950795	9.10762500	2.36350109		57.00000000	0.60245614	5.48694461	1.198829
58	0.26934674	9.12066750	2.45662206		58.00000000	0.59206897	5.40006417	1.220212
59	0.27947879	9.11408330	2.54719297		59.00000000	0.58203390	5.30470543	1.241592
60	0.28933918	9.11611460	2.63764912		60.00000000	0.57233333	5.21745626	1.263074
61	0.29946825	9.10019300	2.72521887		61.00000000	0.56295082	5.12296111	1.284459
62	0.30929220	9.13243680	2.82459147		62.00000000	0.55387097	5.05819161	1.305811
63	0.31942943	9.10256960	2.90762862		63.00000000	0.54507937	4.96162286	1.327181
64	0.32922882	9.11265470	3.00014855		64.00000000	0.53656250	4.88950879	1.348662
65	0.33940849	9.11479470	3.09363871		65.00000000	0.52830769	4.81541615	1.370087
66	0.34920189	9.11309720	3.18231077		66.00000000	0.52030303	4.74157209	1.391468
67	0.35938826	9.10455230	3.27206921		67.00000000	0.51253731	4.66642278	1.412850
68	0.36955380	9.11596780	3.36884054		68.00000000	0.50500000	4.60356374	1.434339
69	0.37937176	9.10448070	3.45398287		69.00000000	0.49768116	4.53112851	1.455720
70	0.38951945	9.11351970	3.54989318		70.00000000	0.49057143	4.47083238	1.477072
71	0.39933741	9.09723760	3.63286730		71.00000000	0.48366197	4.39998788	1.498443
72	0.40946275	9.11027150	3.73031682		72.00000000	0.47694444	4.34509338	1.519936
73	0.41929710	9.09902670	3.81519551		73.00000000	0.47041096	4.28028188	1.541307
74	0.42941204	9.10742470	3.91083782		74.00000000	0.46405405	4.22633735	1.562654
75	0.43926200	9.09962750	3.99712057		75.00000000	0.45786667	4.16641611	1.584040
76	0.44942009	9.10403350	4.09153555		76.00000000	0.45184211	4.11358566	1.605516
77	0.45956481	9.09261990	4.17864814		77.00000000	0.44597403	4.05507230	1.626888
78	0.46942073	9.09536360	4.26955222		78.00000000	0.44025641	4.00429213	1.648259
79	0.47955501	9.08384800	4.35620482		79.00000000	0.43468354	3.94859924	1.669638
80	0.48937148	9.09046840	4.44861597		80.00000000	0.42925000	3.90208356	1.691109
81	0.49950352	9.06065370	4.52582842		81.00000000	0.42395062	3.84126973	1.712474
82	0.50933343	9.06973550	4.61951949		82.00000000	0.41878049	3.79822826	1.733833
83	0.51947141	9.01688000	4.68401137		83.00000000	0.41373494	3.73059830	1.755222
84	0.52921945	9.00695130	4.76665381		84.00000000	0.40880952	3.68212747	1.776710
85	0.53939462	8.96126840	4.83365996		85.00000000	0.40400000	3.62035243	1.798085
86	0.54952294	8.87309170	4.87596744		86.00000000	0.39930233	3.54304615	1.819483
87	0.55932605	8.80528070	4.92502287		87.00000000	0.39471264	3.47555562	1.840825
88	0.56947672	8.66280940	4.93326828		88.00000000	0.39022727	3.38046449	1.862303
89	0.57928646	8.50203700	4.92511492		89.00000000	0.38584270	3.28044888	1.883691
90	0.58939695	8.23788450	4.85538400		90.00000000	0.38155556	3.14321060	1.905074
91	0.59923500	7.92173190	4.74697902		91.00000000	0.37736264	2.98936564	1.926544
92	0.60933805	7.45385500	4.54191747		92.00000000	0.37326087	2.78223240	1.947926
93	0.61915302	6.86299560	4.24924445		93.00000000	0.36924731	2.53414268	1.969280
94	0.62920839	6.03563500	3.79767218		94.00000000	0.36531915	2.20493304	1.990754
95	0.63937247	5.02608390	3.21353968		95.00000000	0.36147368	1.81679706	2.012254
96	0.64913833	3.74930570	2.43381804		96.00000000	0.35770833	1.34115789	2.033640
97	0.65924358	2.13990740	1.41072022		97.00000000	0.35402062	0.75757134	2.055003
98	0.66897297	0.25320095	0.16938459		98.00000000	0.35040816	0.08872368	2.076435
99	0.67904699	-2.06229850	-1.40039759		99.00000000	0.34686869	-0.71534677	2.097921
100	0.68880242	-4.67322490	-3.21892862		100.00000000	0.34340000	-1.60478543	2.119304
101	0.69898432	-7.83433910	-5.47608019		101.00000000	0.34000000	-2.66367529	2.140660
01:59 04/04/2018
Test Lot:	JK-PERC
Recipe:	Recipe_YJX-LID
Cell Name:	3-16-5h
Test Order:	4
Test Condition:	Light
1	-0.29993847	9.12330440	-2.73642996		1.00000000	34.34000000	313.29427310	0.000000
2	-0.29012752	9.11181450	-2.64358814		2.00000000	17.17000000	156.44985497	0.061781
3	-0.27996302	9.10976120	-2.55039626		3.00000000	11.44666667	104.27639987	0.083238
4	-0.27014390	9.11619000	-2.46268312		4.00000000	8.58500000	78.26249115	0.104738
5	-0.25996673	9.11703970	-2.37012700		5.00000000	6.86800000	62.61582866	0.126132
6	-0.24981715	9.11363120	-2.27674137		6.00000000	5.72333333	52.16034923	0.147476
7	-0.23999502	9.11866470	-2.18843412		7.00000000	4.90571429	44.73356369	0.168896
8	-0.22983500	9.10403060	-2.09242487		8.00000000	4.29250000	39.07905135	0.190384
9	-0.22004488	9.11283210	-2.00523205		9.00000000	3.81555556	34.77051715	0.211762
10	-0.20988263	9.11693950	-1.91348724		10.00000000	3.43400000	31.30757024	0.233111
11	-0.20007762	9.11921410	-1.82455065		11.00000000	3.12181818	28.46852838	0.254478
12	-0.18990494	9.10114190	-1.72835181		12.00000000	2.86166667	26.04443440	0.275954
13	-0.18016842	9.12336440	-1.64374215		13.00000000	2.64153846	24.09971796	0.297344
14	-0.16999947	9.10854150	-1.54844723		14.00000000	2.45285714	22.34195108	0.318691
15	-0.16016990	9.11229520	-1.45951541		15.00000000	2.28933333	20.86108114	0.340059
16	-0.15004039	9.10522560	-1.36615160		16.00000000	2.14625000	19.54209044	0.361545
17	-0.13990940	9.11801050	-1.27569538		17.00000000	2.02000000	18.41838121	0.382927
18	-0.13007611	9.10967450	-1.18495102		18.00000000	1.90777778	17.37923457	0.404281
19	-0.11992874	9.11960320	-1.09370252		19.00000000	1.80736842	16.48248284	0.425661
20	-0.11010364	9.10689450	-1.00270223		20.00000000	1.71700000	15.63653786	0.447130
21	-0.09994734	9.10841660	-0.91036202		21.00000000	1.63523810	14.89442981	0.468518
22	-0.09016020	9.11726000	-0.82201398		22.00000000	1.56090909	14.23121402	0.489899
23	-0.07997637	9.11361120	-0.72887350		23.00000000	1.49304348	13.60701777	0.511242
24	-0.07014903	9.10706420	-0.63885169		24.00000000	1.43083333	13.03069103	0.532714
25	-0.06000762	9.12129690	-0.54734729		25.00000000	1.37360000	12.52901342	0.554086
26	-0.04985653	9.11767670	-0.45457568		26.00000000	1.32076923	12.04234684	0.575459
27	-0.04004334	9.11240010	-0.36489089		27.00000000	1.27185185	11.58962294	0.596874
28	-0.02989373	9.10200310	-0.27209284		28.00000000	1.22642857	11.16295666	0.618335
29	-0.02006566	9.11638830	-0.18292631		29.00000000	1.18413793	10.79506118	0.639710
30	-0.00992499	9.11110500	-0.09042759		30.00000000	1.14466667	10.42917819	0.661088
31	-0.00066627	9.11418910	-0.00607255		31.00000000	1.10774194	10.09616947	0.682563
32	0.00946749	9.10975460	0.08624651		32.00000000	1.07312500	9.77590541	0.704046
33	0.01930571	9.11932560	0.17605502		33.00000000	1.04060606	9.48962549	0.725439
34	0.02946469	9.11120030	0.26845873		34.00000000	1.01000000	9.20231230	0.746808
35	0.03927537	9.10187630	0.35747960		35.00000000	0.98114286	8.93024092	0.768183
36	0.04944106	9.11337760	0.45057503		36.00000000	0.95388889	8.69314963	0.789669
37	0.05924355	9.11238000	0.53984976		37.00000000	0.92810811	8.45727376	0.811047
38	0.06939956	9.12248990	0.63309677		38.00000000	0.90368421	8.24385008	0.832440
39	0.07955781	9.10696600	0.72453023		39.00000000	0.88051282	8.01880032	0.853782
40	0.08936923	9.10792060	0.81396785		40.00000000	0.85850000	7.81914984	0.875253
41	0.09952152	9.11282060	0.90692174		41.00000000	0.83756098	7.63254291	0.896652
42	0.10930540	9.10869690	0.99562976		42.00000000	0.81761905	7.44744408	0.918038
43	0.11948151	9.10972500	1.08844370		43.00000000	0.79860465	7.27506876	0.939508
44	0.12929219	9.11564730	1.17858200		44.00000000	0.78045455	7.11434837	0.960896
45	0.13945861	9.10529710	1.26981208		45.00000000	0.76311111	6.94835339	0.982243
46	0.14927524	9.12245850	1.36175718		46.00000000	0.74652174	6.81011358	1.003619
47	0.15943052	9.10902400	1.45225643		47.00000000	0.73063830	6.65540179	1.025112
48	0.16956940	9.10788730	1.54441898		48.00000000	0.71541667	6.51593437	1.046478
49	0.17938381	9.10861490	1.63393804		49.00000000	0.70081633	6.38346603	1.067834
50	0.18952046	9.10140230	1.72490195		50.00000000	0.68680000	6.25084310	1.089215
51	0.19927011	9.10237310	1.81383089		51.00000000	0.67333333	6.12893122	1.110693
52	0.20942688	9.11512370	1.90895192		52.00000000	0.66038462	6.01948746	1.132073
53	0.21926807	9.10688400	1.99684888		53.00000000	0.64792453	5.90057352	1.153418
54	0.22941366	9.11379340	2.09082870		54.00000000	0.63592593	5.79569751	1.174790
55	0.23925485	9.10595610	2.17864416		55.00000000	0.62436364	5.68542786	1.196259
56	0.24939002	9.10883050	2.27165142		56.00000000	0.61321429	5.58566499	1.217629
57	0.25952372	9.12294390	2.36762034		57.00000000	0.60245614	5.49617357	1.238968
58	0.26934779	9.09137060	2.44874058		58.00000000	0.59206897	5.38271839	1.260345
59	0.27951717	9.13195610	2.55253853		59.00000000	0.58203390	5.31510801	1.281837
60	0.28932190	9.10399720	2.63398577		60.00000000	0.57233333	5.21052106	1.303212
61	0.29943922	9.11617660	2.72974081		61.00000000	0.56295082	5.13195909	1.324572
62	0.30930647	9.10561750	2.81642641		62.00000000	0.55387097	5.04333718	1.345947
63	0.31945428	9.10785390	2.90954291		63.00000000	0.54507937	4.96450322	1.367416
64	0.32927614	9.11135010	3.00015019		64.00000000	0.53656250	4.88880879	1.388810
65	0.33940312	9.10419750	3.08999304		65.00000000	0.52830769	4.80981757	1.410180
66	0.34921601	9.12234120	3.18566760		66.00000000	0.52030303	4.74638177	1.431554
67	0.35939586	9.09746840	3.26959248		67.00000000	0.51253731	4.66279201	1.453037
68	0.36956230	9.10281560	3.36405747		68.00000000	0.50500000	4.59692188	1.474400
69	0.37937891	9.11643700	3.45858393		69.00000000	0.49768116	4.53707894	1.495783
70	0.38951409	9.11259840	3.54948547		70.00000000	0.49057143	4.47038042	1.517122
71	0.39936569	9.10512540	3.63627469		71.00000000	0.48366197	4.40380290	1.538584
72	0.40947780	9.10042760	3.72642307		72.00000000	0.47694444	4.34039839	1.559975
73	0.41928774	9.11316590	3.82103873		73.00000000	0.47041096	4.28693311	1.581358
74	0.42945045	9.09187600	3.90451024		74.00000000	0.46405405	4.21912192	1.602841
75	0.43927675	9.09996990	3.99740520		75.00000000	0.45786667	4.16657288	1.624231
76	0.44944841	9.10011010	4.09003002		76.00000000	0.45184211	4.11181291	1.645580
77	0.45956123	9.10212330	4.18298298		77.00000000	0.44597403	4.05931057	1.666944
78	0.46940839	9.08598520	4.26503768		78.00000000	0.44025641	4.00016323	1.688431
79	0.47957405	9.09771540	4.36302822		79.00000000	0.43468354	3.95462718	1.709806
80	0.48935571	9.07112880	4.43900867		80.00000000	0.42925000	3.89378204	1.731158
81	0.49949387	9.06774040	4.52928074		81.00000000	0.42395062	3.84427414	1.752526
82	0.50934994	9.05970860	4.61456203		82.00000000	0.41878049	3.79402919	1.774010
83	0.51949257	9.03502750	4.69362966		83.00000000	0.41373494	3.73810656	1.795395
84	0.52925187	9.00084020	4.76371151		84.00000000	0.40880952	3.67962920	1.816747
85	0.53938407	8.93428330	4.81901009		85.00000000	0.40400000	3.60945045	1.838120
86	0.54955125	8.90147500	4.89181671		86.00000000	0.39930233	3.55437967	1.859601
87	0.55937457	8.79828930	4.92153929		87.00000000	0.39471264	3.47279603	1.880979
88	0.56948000	8.67115590	4.93804986		88.00000000	0.39022727	3.38372152	1.902329
89	0.57932341	8.47796630	4.91148435		89.00000000	0.38584270	3.27116138	1.923714
90	0.58941317	8.24956420	4.86240179		90.00000000	0.38155556	3.14766705	1.945187
91	0.59921193	7.89588830	4.73131047		91.00000000	0.37736264	2.97961323	1.966567
92	0.60935009	7.43948320	4.53324976		92.00000000	0.37326087	2.77686797	1.988047
93	0.61912578	6.84271100	4.23649879		93.00000000	0.36924731	2.52665264	2.009450
94	0.62925208	6.03471570	3.79735741		94.00000000	0.36531915	2.20459720	2.030944
95	0.63937902	5.00921010	3.20278384		95.00000000	0.36147368	1.81069763	2.052315
96	0.64918226	3.73791100	2.42658551		96.00000000	0.35770833	1.33708191	2.073675
97	0.65924525	2.13265940	1.40594558		97.00000000	0.35402062	0.75500540	2.095098
98	0.66900009	0.24942261	0.16686375		98.00000000	0.35040816	0.08739972	2.116599
99	0.67912340	-2.06065060	-1.39943604		99.00000000	0.34686869	-0.71477517	2.137975
100	0.68880379	-4.65875480	-3.20896796		100.00000000	0.34340000	-1.59981640	2.159363
101	0.69901860	-7.80386020	-5.45504343		101.00000000	0.34000000	-2.65331247	2.180705
