# Supplementary material for: Study on the Electrical Injection Regeneration of Industrialized B-Doped Czochralski Silicon PERC Solar Cells
Source: Hindawi journal article supplement (doi:10.1155/2019/5357370), 2019-06-20
Supplement: f1 [file 5357370.f1.zip › section3.3/IVRawData_3-16-6h.csv]

03:00 04/04/2018
Test Lot:	JK-PERC
Recipe:	Recipe_YJX-LID
Cell Name:	3-16-6h
Test Order:	2
Test Condition:	Light
1	-0.29989690	9.10511490	-2.73059573		1.00000000	34.34000000	312.66964567	0.000000
2	-0.29012629	9.12289240	-2.64679093		2.00000000	17.17000000	156.64006251	0.061785
3	-0.28000292	9.10452750	-2.54929429		3.00000000	11.44666667	104.21649145	0.083207
4	-0.27015343	9.11787610	-2.46322550		4.00000000	8.58500000	78.27696632	0.104694
5	-0.25998613	9.10867500	-2.36812916		5.00000000	6.86800000	62.55837990	0.126078
6	-0.24983373	9.12153240	-2.27886646		6.00000000	5.72333333	52.20557044	0.147445
7	-0.24003781	9.11065290	-2.18690117		7.00000000	4.90571429	44.69426008	0.168825
8	-0.22988094	9.11814790	-2.09608841		8.00000000	4.29250000	39.13964986	0.190307
9	-0.22002624	9.11446480	-2.00542142		9.00000000	3.81555556	34.77674680	0.211733
10	-0.20988202	9.09897520	-1.90971129		10.00000000	3.43400000	31.24588084	0.233148
11	-0.20006527	9.12574960	-1.82574556		11.00000000	3.12181818	28.48893102	0.254527
12	-0.18991660	9.11383720	-1.73086897		12.00000000	2.86166667	26.08076412	0.276031
13	-0.18008719	9.11352630	-1.64122934		13.00000000	2.64153846	24.07373024	0.297402
14	-0.16996083	9.12779710	-1.55136797		14.00000000	2.45285714	22.38918232	0.318767
15	-0.16016194	9.12191490	-1.46098359		15.00000000	2.28933333	20.88310384	0.340134
16	-0.15002888	9.10744190	-1.36637931		16.00000000	2.14625000	19.54684718	0.361622
17	-0.13985193	9.12978840	-1.27681853		17.00000000	2.02000000	18.44217257	0.383010
18	-0.13003145	9.10695460	-1.18419051		18.00000000	1.90777778	17.37404561	0.404373
19	-0.11992072	9.11764240	-1.09339424		19.00000000	1.80736842	16.47893895	0.425729
20	-0.11011365	9.11035920	-1.00317490		20.00000000	1.71700000	15.64248675	0.447199
21	-0.09990320	9.11260510	-0.91037837		21.00000000	1.63523810	14.90127901	0.468575
22	-0.09008794	9.13352010	-0.82281997		22.00000000	1.56090909	14.25659456	0.489963
23	-0.07997349	9.10615630	-0.72825109		23.00000000	1.49304348	13.59588728	0.511320
24	-0.07014409	9.12364670	-0.63996987		24.00000000	1.43083333	13.05441782	0.532800
25	-0.06002294	9.12433620	-0.54766948		25.00000000	1.37360000	12.53318820	0.554165
26	-0.04981992	9.12160780	-0.45443777		26.00000000	1.32076923	12.04753892	0.575560
27	-0.04002104	9.11273860	-0.36470124		27.00000000	1.27185185	11.59005346	0.597042
28	-0.02991403	9.11367030	-0.27262660		28.00000000	1.22642857	11.17726565	0.618435
29	-0.02005114	9.11666390	-0.18279949		29.00000000	1.18413793	10.79538753	0.639790
30	-0.00991808	9.11304760	-0.09038396		30.00000000	1.14466667	10.43140182	0.661161
31	-0.00066697	9.10621640	-0.00607358		31.00000000	1.10774194	10.08733778	0.682753
32	0.00950235	9.11132720	0.08657899		32.00000000	1.07312500	9.77759300	0.704138
33	0.01931286	9.10495190	0.17584266		33.00000000	1.04060606	9.47466813	0.725486
34	0.02944414	9.11707120	0.26844431		34.00000000	1.01000000	9.20824191	0.746865
35	0.03925242	9.11094470	0.35762662		35.00000000	0.98114286	8.93913831	0.768348
36	0.04939188	9.10376170	0.44965194		36.00000000	0.95388889	8.68397713	0.789730
37	0.05923068	9.12998010	0.54077495		37.00000000	0.92810811	8.47360856	0.811086
38	0.06939619	9.10469440	0.63183110		38.00000000	0.90368421	8.22776857	0.832462
39	0.07951110	9.11732480	0.72492851		39.00000000	0.88051282	8.02792138	0.853936
40	0.08935957	9.12061600	0.81501430		40.00000000	0.85850000	7.83004884	0.875318
41	0.09951615	9.11095810	0.90668750		41.00000000	0.83756098	7.63098295	0.896672
42	0.10936760	9.11591820	0.99698610		42.00000000	0.81761905	7.45334836	0.918053
43	0.11950334	9.11192610	1.08890560		43.00000000	0.79860465	7.27682656	0.939524
44	0.12930046	9.12023740	1.17925089		44.00000000	0.78045455	7.11793073	0.960895
45	0.13944663	9.11610980	1.27121079		45.00000000	0.76311111	6.95660468	0.982256
46	0.14928542	9.11302570	1.36044187		46.00000000	0.74652174	6.80307179	1.003637
47	0.15939809	9.11867330	1.45349911		47.00000000	0.73063830	6.66245194	1.025123
48	0.16955394	9.11796280	1.54598652		48.00000000	0.71541667	6.52314255	1.046510
49	0.17937411	9.11118980	1.63431156		49.00000000	0.70081633	6.38527057	1.067868
50	0.18952401	9.10414220	1.72545354		50.00000000	0.68680000	6.25272486	1.089224
51	0.19932485	9.11456970	1.81676024		51.00000000	0.67333333	6.13714360	1.110700
52	0.20945315	9.11966130	1.91014179		52.00000000	0.66038462	6.02248402	1.132073
53	0.21931575	9.11227320	1.99846503		53.00000000	0.64792453	5.90406531	1.153451
54	0.22940685	9.11514850	2.09107750		54.00000000	0.63592593	5.79655925	1.174808
55	0.23925605	9.11542420	2.18092039		55.00000000	0.62436364	5.69133940	1.196274
56	0.24938212	9.10673900	2.27105788		56.00000000	0.61321429	5.58438245	1.217650
57	0.25954318	9.11085990	2.36466155		57.00000000	0.60245614	5.48889349	1.239034
58	0.26935592	9.11283590	2.45459630		58.00000000	0.59206897	5.39542732	1.260515
59	0.27948868	9.11569310	2.54773303		59.00000000	0.58203390	5.30564239	1.281893
60	0.28934237	9.11703110	2.63794339		60.00000000	0.57233333	5.21798080	1.303235
61	0.29946768	9.11509510	2.72967638		61.00000000	0.56295082	5.13135026	1.324608
62	0.30928415	9.11162760	2.81808200		62.00000000	0.55387097	5.04666600	1.346102
63	0.31945264	9.11555960	2.91198958		63.00000000	0.54507937	4.96870344	1.367475
64	0.32924604	9.11591820	3.00137997		64.00000000	0.53656250	4.89125986	1.388833
65	0.33939296	9.10675720	3.09076928		65.00000000	0.52830769	4.81116988	1.410205
66	0.34922504	9.11240860	3.18228126		66.00000000	0.52030303	4.74121381	1.431679
67	0.35937047	9.10429950	3.27181639		67.00000000	0.51253731	4.66629321	1.453042
68	0.36955458	9.11721130	3.36930719		68.00000000	0.50500000	4.60419171	1.474400
69	0.37933236	9.11425590	3.45733220		69.00000000	0.49768116	4.53599344	1.495779
70	0.38949043	9.10416410	3.54598479		70.00000000	0.49057143	4.46624279	1.517258
71	0.39930317	9.11440940	3.63941257		71.00000000	0.48366197	4.40829322	1.538636
72	0.40947688	9.10332300	3.72760030		72.00000000	0.47694444	4.34177933	1.559976
73	0.41927993	9.09880160	3.81494490		73.00000000	0.47041096	4.28017599	1.581359
74	0.42943653	9.11651420	3.91496422		74.00000000	0.46405405	4.23055537	1.602835
75	0.43928128	9.09505370	3.99528683		75.00000000	0.45786667	4.16432192	1.624205
76	0.44942299	9.10995200	4.09422187		76.00000000	0.45184211	4.11625989	1.645570
77	0.45957956	9.09054370	4.17782807		77.00000000	0.44597403	4.05414637	1.666938
78	0.46944439	9.09469800	4.26945495		78.00000000	0.44025641	4.00399909	1.688416
79	0.47954667	9.09268860	4.36036854		79.00000000	0.43468354	3.95244211	1.709807
80	0.48937055	9.08288380	4.44489584		80.00000000	0.42925000	3.89882787	1.731178
81	0.49949440	9.06666850	4.52875014		81.00000000	0.42395062	3.84381971	1.752546
82	0.50933838	9.05138780	4.61021920		82.00000000	0.41878049	3.79054460	1.774017
83	0.51946002	9.02995780	4.69070206		83.00000000	0.41373494	3.73600905	1.795397
84	0.52924520	8.99743750	4.76185061		84.00000000	0.40880952	3.67823814	1.816780
85	0.53938913	8.94062610	4.82247653		85.00000000	0.40400000	3.61201294	1.838126
86	0.54954797	8.86964420	4.87429496		86.00000000	0.39930233	3.54166956	1.859599
87	0.55935550	8.78928470	4.91633474		87.00000000	0.39471264	3.46924180	1.880989
88	0.56948155	8.65012740	4.92608796		88.00000000	0.39022727	3.37551562	1.902363
89	0.57927793	8.46679970	4.90463020		89.00000000	0.38584270	3.26685283	1.923840
90	0.58943003	8.20876120	4.83849036		90.00000000	0.38155556	3.13209844	1.945230
91	0.59920484	7.86495300	4.71271790		91.00000000	0.37736264	2.96793941	1.966576
92	0.60933387	7.37487360	4.49376027		92.00000000	0.37326087	2.75275173	1.988059
93	0.61914515	6.78048800	4.19810626		93.00000000	0.36924731	2.50367697	2.009580
94	0.62925190	5.95341210	3.74619588		94.00000000	0.36531915	2.17489544	2.030953
95	0.63937795	4.93173120	3.15324018		95.00000000	0.36147368	1.78269105	2.052301
96	0.64916986	3.66506240	2.37924805		96.00000000	0.35770833	1.31102336	2.073684
97	0.65926242	2.07830950	1.37015135		97.00000000	0.35402062	0.73576441	2.095157
98	0.66896951	0.23583880	0.15776897		98.00000000	0.35040816	0.08263984	2.116532
99	0.67907548	-2.02559190	-1.37552979		99.00000000	0.34686869	-0.70261440	2.137891
100	0.68878549	-4.53227280	-3.12176374		100.00000000	0.34340000	-1.55638248	2.159271
101	0.69899642	-7.55434560	-5.28046053		101.00000000	0.34000000	-2.56847750	2.180752
03:00 04/04/2018
Test Lot:	JK-PERC
Recipe:	Recipe_YJX-LID
Cell Name:	3-16-6h
Test Order:	3
Test Condition:	Light
1	-0.29992071	9.11642740	-2.73420538		1.00000000	34.34000000	313.05811692	0.000000
2	-0.29005113	9.11272720	-2.64315682		2.00000000	17.17000000	156.46552602	0.021523
3	-0.27992851	9.12211510	-2.55354009		3.00000000	11.44666667	104.41781084	0.042912
4	-0.27009761	9.11947440	-2.46314824		4.00000000	8.58500000	78.29068772	0.064299
5	-0.25995636	9.11079120	-2.36840812		5.00000000	6.86800000	62.57291396	0.085825
6	-0.24983373	9.10764880	-2.27539787		6.00000000	5.72333333	52.12610997	0.107237
7	-0.24004601	9.12288570	-2.18991231		7.00000000	4.90571429	44.75427071	0.128587
8	-0.22990105	9.11349680	-2.09520248		8.00000000	4.29250000	39.11968501	0.149973
9	-0.22004411	9.11867520	-2.00651077		9.00000000	3.81555556	34.79281182	0.171448
10	-0.20989914	9.11789230	-1.91383775		10.00000000	3.43400000	31.31084216	0.192881
11	-0.20008686	9.11385540	-1.82356271		11.00000000	3.12181818	28.45179949	0.214255
12	-0.18990989	9.10476300	-1.72908454		12.00000000	2.86166667	26.05479679	0.235635
13	-0.18016757	9.11482140	-1.64219522		13.00000000	2.64153846	24.07715130	0.257115
14	-0.16998018	9.11810590	-1.54989728		14.00000000	2.45285714	22.36541119	0.278503
15	-0.16018724	9.11358360	-1.45987980		15.00000000	2.28933333	20.86403072	0.299848
16	-0.15002368	9.12042620	-1.36827990		16.00000000	2.14625000	19.57471473	0.321212
17	-0.13989286	9.10241990	-1.27336355		17.00000000	2.02000000	18.38688820	0.342703
18	-0.13005899	9.12156110	-1.18634102		18.00000000	1.90777778	17.40191157	0.364062
19	-0.11990435	9.12522890	-1.09415464		19.00000000	1.80736842	16.49265055	0.385422
20	-0.11011142	9.10475440	-1.00253744		20.00000000	1.71700000	15.63286330	0.406791
21	-0.09992626	9.12657550	-0.91198458		21.00000000	1.63523810	14.92412394	0.428267
22	-0.09013259	9.11540600	-0.82159519		22.00000000	1.56090909	14.22832009	0.449671
23	-0.07996083	9.12684630	-0.72979021		23.00000000	1.49304348	13.62677835	0.471031
24	-0.07015302	9.10526850	-0.63876208		24.00000000	1.43083333	13.02812168	0.492404
25	-0.05999391	9.13950630	-0.54831474		25.00000000	1.37360000	12.55402585	0.513875
26	-0.04981918	9.10352520	-0.45353015		26.00000000	1.32076923	12.02365598	0.535255
27	-0.04002773	9.12226200	-0.36514348		27.00000000	1.27185185	11.60216582	0.556604
28	-0.02987235	9.11005690	-0.27213881		28.00000000	1.22642857	11.17283407	0.577978
29	-0.02006081	9.11503700	-0.18285505		29.00000000	1.18413793	10.79346105	0.599449
30	-0.00990245	9.13123040	-0.09042158		30.00000000	1.14466667	10.45221506	0.620816
31	-0.00066399	9.12278370	-0.00605747		31.00000000	1.10774194	10.10569007	0.642328
32	0.00950309	9.11221980	0.08659425		32.00000000	1.07312500	9.77855087	0.663733
33	0.01931881	9.11960120	0.17617987		33.00000000	1.04060606	9.48991228	0.685216
34	0.02943893	9.11310960	0.26828020		34.00000000	1.01000000	9.20424070	0.706590
35	0.03930377	9.11194420	0.35813378		35.00000000	0.98114286	8.94011897	0.727971
36	0.04944696	9.11833670	0.45087402		36.00000000	0.95388889	8.69788006	0.749394
37	0.05928203	9.10636040	0.53984354		37.00000000	0.92810811	8.45168692	0.770867
38	0.06936792	9.11960120	0.63260772		38.00000000	0.90368421	8.24123961	0.792226
39	0.07951333	9.12040230	0.72519359		39.00000000	0.88051282	8.03063115	0.813628
40	0.08932608	9.11054900	0.81380959		40.00000000	0.85850000	7.82140632	0.834994
41	0.09949457	9.10886860	0.90628296		41.00000000	0.83756098	7.62923287	0.856479
42	0.10929988	9.10852620	0.99556082		42.00000000	0.81761905	7.44730452	0.877863
43	0.11943115	9.11783220	1.08895319		43.00000000	0.79860465	7.28154320	0.899228
44	0.12929748	9.11405090	1.17842381		44.00000000	0.78045455	7.11310245	0.920588
45	0.13940866	9.12197490	1.27168230		45.00000000	0.76311111	6.96108040	0.942071
46	0.14922513	9.11567310	1.36028750		46.00000000	0.74652174	6.80504814	0.963448
47	0.15941596	9.10143570	1.45091411		47.00000000	0.73063830	6.64985749	0.984839
48	0.16951820	9.10998150	1.54430767		48.00000000	0.71541667	6.51743260	1.006182
49	0.17936668	9.12338830	1.63643187		49.00000000	0.70081633	6.39381947	1.027647
50	0.18950838	9.11191940	1.72678508		50.00000000	0.68680000	6.25806624	1.049023
51	0.19929954	9.12029080	1.81766976		51.00000000	0.67333333	6.14099581	1.070405
52	0.20943826	9.11471650	1.90897036		52.00000000	0.66038462	6.01921855	1.091874
53	0.21925622	9.11543080	1.99861490		53.00000000	0.64792453	5.90611120	1.113272
54	0.22943066	9.11707780	2.09173718		54.00000000	0.63592593	5.79778614	1.134615
55	0.23926127	9.11197950	2.18014379		55.00000000	0.62436364	5.68918866	1.155983
56	0.24941413	9.11923120	2.27446512		56.00000000	0.61321429	5.59204285	1.177469
57	0.25950372	9.09943580	2.36133744		57.00000000	0.60245614	5.48201097	1.198850
58	0.26937154	9.12169740	2.45712568		58.00000000	0.59206897	5.40067394	1.220204
59	0.27954301	9.10762210	2.54597210		59.00000000	0.58203390	5.30094480	1.241602
60	0.28931931	9.11153030	2.63614166		60.00000000	0.57233333	5.21483251	1.263080
61	0.29949299	9.10791870	2.72775780		61.00000000	0.56295082	5.12731030	1.284476
62	0.30930054	9.12197490	2.82143176		62.00000000	0.55387097	5.05239707	1.305821
63	0.31945115	9.09244160	2.90459093		63.00000000	0.54507937	4.95610229	1.327191
64	0.32927805	9.11820790	3.00242572		64.00000000	0.53656250	4.89248843	1.348670
65	0.33941826	9.10927100	3.09185291		65.00000000	0.52830769	4.81249794	1.370051
66	0.34925631	9.10832600	3.18114033		66.00000000	0.52030303	4.73908962	1.391385
67	0.35940173	9.11703300	3.27667743		67.00000000	0.51253731	4.67281960	1.412760
68	0.36955607	9.10964970	3.36652634		68.00000000	0.50500000	4.60037310	1.434240
69	0.37935469	9.11630340	3.45831245		69.00000000	0.49768116	4.53701245	1.455617
70	0.38953581	9.10423090	3.54642396		70.00000000	0.49057143	4.46627556	1.476980
71	0.39933071	9.11567310	3.64016821		71.00000000	0.48366197	4.40890443	1.498353
72	0.40949547	9.10672570	3.72916292		72.00000000	0.47694444	4.34340223	1.519819
73	0.41929781	9.08963110	3.81126241		73.00000000	0.47041096	4.27586208	1.541206
74	0.42943877	9.12516880	3.91870127		74.00000000	0.46405405	4.23457158	1.562574
75	0.43922397	9.09887220	3.99644277		75.00000000	0.45786667	4.16607028	1.583935
76	0.44941926	9.10508350	4.09199989		76.00000000	0.45184211	4.11406010	1.605423
77	0.45955798	9.10079960	4.18234508		77.00000000	0.44597403	4.05872024	1.626788
78	0.46941686	9.08054070	4.26255890		78.00000000	0.44025641	3.99776625	1.648174
79	0.47954592	9.09054760	4.35933501		79.00000000	0.43468354	3.95151145	1.669527
80	0.48938993	9.08558750	4.44639503		80.00000000	0.42925000	3.89998843	1.691004
81	0.49949738	9.06077770	4.52583472		81.00000000	0.42395062	3.84132230	1.712393
82	0.50930566	9.06013970	4.61438043		82.00000000	0.41878049	3.79420972	1.733773
83	0.51947343	9.02509310	4.68829607		83.00000000	0.41373494	3.73399635	1.755253
84	0.52925491	9.00013730	4.76336686		84.00000000	0.40880952	3.67934184	1.776637
85	0.53938019	8.95004370	4.82747627		85.00000000	0.40400000	3.61581765	1.797981
86	0.54953605	8.88203050	4.88099596		86.00000000	0.39930233	3.54661543	1.819347
87	0.55939496	8.79848480	4.92182805		87.00000000	0.39471264	3.47287320	1.840823
88	0.56947410	8.65702530	4.92995169		88.00000000	0.39022727	3.37820737	1.862205
89	0.57930994	8.48183820	4.91361318		89.00000000	0.38584270	3.27265532	1.883550
90	0.58941221	8.23698430	4.85497912		90.00000000	0.38155556	3.14286712	1.904929
91	0.59923685	7.88922640	4.72751518		91.00000000	0.37736264	2.97709928	1.926407
92	0.60931158	7.42295930	4.52289506		92.00000000	0.37326087	2.77070024	1.947800
93	0.61916375	6.83011630	4.22896042		93.00000000	0.36924731	2.52200208	1.969152
94	0.62927270	6.02197980	3.78946749		94.00000000	0.36531915	2.19994454	1.990625
95	0.63939732	4.96728660	3.17606974		95.00000000	0.36147368	1.79554339	2.012120
96	0.64914900	3.71788140	2.41345899		96.00000000	0.35770833	1.32991716	2.033498
97	0.65925646	2.09663920	1.38222294		97.00000000	0.35402062	0.74225351	2.054840
98	0.66899556	0.21106923	0.14120438		98.00000000	0.35040816	0.07396038	2.076219
99	0.67910373	-2.10723230	-1.43102931		99.00000000	0.34686869	-0.73093290	2.097696
100	0.68879670	-4.72046330	-3.25143954		100.00000000	0.34340000	-1.62100710	2.119073
101	0.69897556	-7.86217640	-5.49546915		101.00000000	0.34000000	-2.67313998	2.140436
03:01 04/04/2018
Test Lot:	JK-PERC
Recipe:	Recipe_YJX-LID
Cell Name:	3-16-6h
Test Order:	4
Test Condition:	Light
1	-0.29995480	9.11650940	-2.73454075		1.00000000	34.34000000	313.06093280	0.000000
2	-0.29011258	9.10456850	-2.64134986		2.00000000	17.17000000	156.32544115	0.061804
3	-0.27997193	9.12064170	-2.55352366		3.00000000	11.44666667	104.40094533	0.083216
4	-0.27016392	9.11034010	-2.46128519		4.00000000	8.58500000	78.21226976	0.104601
5	-0.26000392	9.10576060	-2.36753345		5.00000000	6.86800000	62.53836380	0.126084
6	-0.24987961	9.11629770	-2.27797691		6.00000000	5.72333333	52.17561050	0.147462
7	-0.24006048	9.10797020	-2.18646370		7.00000000	4.90571429	44.68109952	0.168842
8	-0.22991014	9.12946320	-2.09895616		8.00000000	4.29250000	39.18822079	0.190196
9	-0.22007610	9.11049180	-2.00500150		9.00000000	3.81555556	34.76158760	0.211672
10	-0.20988631	9.12062170	-1.91429363		10.00000000	3.43400000	31.32021492	0.233048
11	-0.20010215	9.10803320	-1.82253703		11.00000000	3.12181818	28.43362364	0.254432
12	-0.18993916	9.11356740	-1.73102334		12.00000000	2.86166667	26.07999204	0.275924
13	-0.18017657	9.11004450	-1.64141657		13.00000000	2.64153846	24.06453293	0.297316
14	-0.17002772	9.12584880	-1.55164726		14.00000000	2.45285714	22.38440341	0.318689
15	-0.16019592	9.11500450	-1.46018653		15.00000000	2.28933333	20.86728364	0.340065
16	-0.15001729	9.12035660	-1.36821118		16.00000000	2.14625000	19.57456535	0.361549
17	-0.13986471	9.11140630	-1.27436420		17.00000000	2.02000000	18.40504073	0.382938
18	-0.13009991	9.11725230	-1.18615370		18.00000000	1.90777778	17.39369133	0.404284
19	-0.11996817	9.10015960	-1.09172949		19.00000000	1.80736842	16.44734109	0.425658
20	-0.11010437	9.11823180	-1.00395717		20.00000000	1.71700000	15.65600400	0.447135
21	-0.09997933	9.11371420	-0.91118300		21.00000000	1.63523810	14.90309265	0.468510
22	-0.09013563	9.11260800	-0.82137063		22.00000000	1.56090909	14.22395267	0.489866
23	-0.07998305	9.12661170	-0.72997422		23.00000000	1.49304348	13.62642808	0.511254
24	-0.07013785	9.10661790	-0.63871861		24.00000000	1.43083333	13.03005245	0.532721
25	-0.06001951	9.10953900	-0.54675009		25.00000000	1.37360000	12.51286277	0.554110
26	-0.04983642	9.11634450	-0.45432597		26.00000000	1.32076923	12.04058731	0.575460
27	-0.04002100	9.10882470	-0.36454426		27.00000000	1.27185185	11.58507556	0.596829
28	-0.02990564	9.10774990	-0.27237305		28.00000000	1.22642857	11.17000470	0.618311
29	-0.02006788	9.11511610	-0.18292109		29.00000000	1.18413793	10.79355472	0.639688
30	-0.00994136	9.11174010	-0.09058306		30.00000000	1.14466667	10.42990517	0.661026
31	-0.00067744	9.10295680	-0.00616669		31.00000000	1.10774194	10.08372698	0.682525
32	0.00945335	9.12870120	0.08629679		32.00000000	1.07312500	9.79623748	0.704011
33	0.01928933	9.10937500	0.17571374		33.00000000	1.04060606	9.47927083	0.725397
34	0.02944608	9.11305140	0.26834366		34.00000000	1.01000000	9.20418191	0.746753
35	0.03927090	9.11863230	0.35809690		35.00000000	0.98114286	8.94668095	0.768119
36	0.04943063	9.11057850	0.45034164		36.00000000	0.95388889	8.69047960	0.789612
37	0.05924577	9.11975380	0.54030686		37.00000000	0.92810811	8.46411745	0.810990
38	0.06934299	9.12000940	0.63240868		38.00000000	0.90368421	8.24160849	0.832370
39	0.07951240	9.10677530	0.72410151		39.00000000	0.88051282	8.01863241	0.853731
40	0.08935656	9.12153150	0.81506871		40.00000000	0.85850000	7.83083479	0.875199
41	0.09949917	9.11810490	0.90724390		41.00000000	0.83756098	7.63696884	0.896572
42	0.10924287	9.10419650	0.99456855		42.00000000	0.81761905	7.44376447	0.917967
43	0.11943013	9.12523460	1.08982795		43.00000000	0.79860465	7.28745479	0.939443
44	0.12927951	9.10083870	1.17655197		44.00000000	0.78045455	7.10279093	0.960817
45	0.13943551	9.11150650	1.27046756		45.00000000	0.76311111	6.95309185	0.982169
46	0.14922759	9.11649130	1.36043203		46.00000000	0.74652174	6.80565894	1.003542
47	0.15941262	9.10902790	1.45209400		47.00000000	0.73063830	6.65540464	1.025023
48	0.16953216	9.12699510	1.54731919		48.00000000	0.71541667	6.52960441	1.046396
49	0.17936741	9.10234740	1.63266448		49.00000000	0.70081633	6.37907367	1.067742
50	0.18949513	9.11954400	1.72810918		50.00000000	0.68680000	6.26330282	1.089114
51	0.19929241	9.11004920	1.81556366		51.00000000	0.67333333	6.13409979	1.110592
52	0.20944247	9.11489580	1.90904629		52.00000000	0.66038462	6.01933696	1.131962
53	0.21928069	9.11059000	1.99777646		53.00000000	0.64792453	5.90297473	1.153318
54	0.22943446	9.11620900	2.09157249		54.00000000	0.63592593	5.79723365	1.174694
55	0.23921908	9.11718750	2.18100521		55.00000000	0.62436364	5.69244034	1.196164
56	0.24940635	9.12276460	2.27527542		56.00000000	0.61321429	5.59420958	1.217547
57	0.25955641	9.10941890	2.36440807		57.00000000	0.60245614	5.48802535	1.238883
58	0.26934624	9.11768630	2.45581452		58.00000000	0.59206897	5.39829910	1.260260
59	0.27954170	9.11768150	2.54877219		59.00000000	0.58203390	5.30679971	1.281750
60	0.28936875	9.09754090	2.63254404		60.00000000	0.57233333	5.20682591	1.303136
61	0.29946151	9.12368390	2.73219216		61.00000000	0.56295082	5.13618533	1.324496
62	0.30930418	9.09834860	2.81415725		62.00000000	0.55387097	5.03931114	1.345876
63	0.31941405	9.11109070	2.91021038		63.00000000	0.54507937	4.96626753	1.367354
64	0.32926565	9.11276150	3.00051934		64.00000000	0.53656250	4.88956609	1.388740
65	0.33940902	9.10701370	3.09100260		65.00000000	0.52830769	4.81130539	1.410106
66	0.34921151	9.11414620	3.18276476		66.00000000	0.52030303	4.74211789	1.431480
67	0.35937718	9.11045840	3.27409085		67.00000000	0.51253731	4.66944987	1.452954
68	0.36955628	9.10830400	3.36603094		68.00000000	0.50500000	4.59969352	1.474326
69	0.37937066	9.11046700	3.45624388		69.00000000	0.49768116	4.53410778	1.495709
70	0.38949096	9.11000440	3.54826436		70.00000000	0.49057143	4.46910787	1.517068
71	0.39932469	9.11199380	3.63864410		71.00000000	0.48366197	4.40712489	1.538529
72	0.40948516	9.10700510	3.72918344		72.00000000	0.47694444	4.34353549	1.559911
73	0.41925937	9.10189530	3.81605489		73.00000000	0.47041096	4.28163130	1.581293
74	0.42943922	9.11385250	3.91384571		74.00000000	0.46405405	4.22932020	1.602778
75	0.43925136	9.09949210	3.99696428		75.00000000	0.45786667	4.16635412	1.624162
76	0.44941929	9.10029510	4.08984816		76.00000000	0.45184211	4.11189650	1.645508
77	0.45954478	9.11129760	4.18704925		77.00000000	0.44597403	4.06340207	1.666876
78	0.46941054	9.07771110	4.26117327		78.00000000	0.44025641	3.99652050	1.688368
79	0.47951892	9.08905510	4.35837389		79.00000000	0.43468354	3.95086269	1.709759
80	0.48934001	9.07918360	4.44280779		80.00000000	0.42925000	3.89723956	1.731103
81	0.49950421	9.06542210	4.52821650		81.00000000	0.42395062	3.84329130	1.752470
82	0.50932008	9.05059050	4.60964748		82.00000000	0.41878049	3.79021070	1.773951
83	0.51945972	9.02917670	4.69029360		83.00000000	0.41373494	3.73568588	1.795330
84	0.52926075	9.00065900	4.76369553		84.00000000	0.40880952	3.67955512	1.816695
85	0.53940856	8.95113470	4.82831868		85.00000000	0.40400000	3.61625842	1.838065
86	0.54954892	8.88808060	4.88443509		86.00000000	0.39930233	3.54903125	1.859542
87	0.55935812	8.79165940	4.91768607		87.00000000	0.39471264	3.47017912	1.880924
88	0.56947839	8.65264130	4.92749224		88.00000000	0.39022727	3.37649662	1.902268
89	0.57929355	8.49070550	4.91861093		89.00000000	0.38584270	3.27607671	1.923638
90	0.58942056	8.22233390	4.84641265		90.00000000	0.38155556	3.13727718	1.945117
91	0.59921783	7.89035030	4.72803858		91.00000000	0.37736264	2.97752340	1.966491
92	0.60931724	7.43261580	4.52882095		92.00000000	0.37326087	2.77430464	1.987958
93	0.61916441	6.81408640	4.21903979		93.00000000	0.36924731	2.51608309	2.009373
94	0.62925267	6.01812360	3.78692034		94.00000000	0.36531915	2.19853579	2.030896
95	0.63935959	4.95868350	3.17038185		95.00000000	0.36147368	1.79243359	2.052285
96	0.64916950	3.70405150	2.40455726		96.00000000	0.35770833	1.32497009	2.073652
97	0.65927118	2.08686420	1.37580942		97.00000000	0.35402062	0.73879295	2.095014
98	0.66899627	0.21678750	0.14503003		98.00000000	0.35040816	0.07596411	2.116495
99	0.67906892	-2.09410690	-1.42204291		99.00000000	0.34686869	-0.72638011	2.137867
100	0.68880743	-4.68415160	-3.22647843		100.00000000	0.34340000	-1.60853766	2.159245
101	0.69899392	-7.82001830	-5.46614525		101.00000000	0.34000000	-2.65880622	2.180604
