# Supplementary material for: Study on the Electrical Injection Regeneration of Industrialized B-Doped Czochralski Silicon PERC Solar Cells
Source: Hindawi journal article supplement (doi:10.1155/2019/5357370), 2019-06-20
Supplement: f1 [file 5357370.f1.zip › section3.3/IVRawData_3-16-7h.csv]

04:02 04/04/2018
Test Lot:	JK-PERC
Recipe:	Recipe_YJX-LID
Cell Name:	3-16-7h
Test Order:	2
Test Condition:	Light
1	-0.29994181	9.12122440	-2.73583656		1.00000000	34.34000000	313.22284590	0.000000
2	-0.29012424	9.10808660	-2.64247670		2.00000000	17.17000000	156.38584692	0.061795
3	-0.27999780	9.10859110	-2.55038547		3.00000000	11.44666667	104.26300612	0.083207
4	-0.27019215	9.11481760	-2.46275216		4.00000000	8.58500000	78.25070910	0.104704
5	-0.26002178	9.10172180	-2.36664590		5.00000000	6.86800000	62.51062532	0.126080
6	-0.24986334	9.11289690	-2.27697886		6.00000000	5.72333333	52.15614659	0.147417
7	-0.24002418	9.10967060	-2.18654122		7.00000000	4.90571429	44.68944120	0.168785
8	-0.22987989	9.10371780	-2.09276165		8.00000000	4.29250000	39.07770866	0.190281
9	-0.22006157	9.10369970	-2.00337445		9.00000000	3.81555556	34.73567197	0.211716
10	-0.20989047	9.09997460	-1.90999795		10.00000000	3.43400000	31.24931278	0.233141
11	-0.20011309	9.10994430	-1.82301910		11.00000000	3.12181818	28.43958975	0.254497
12	-0.18992636	9.10148330	-1.72861159		12.00000000	2.86166667	26.04541138	0.275967
13	-0.18018024	9.11013600	-1.64146649		13.00000000	2.64153846	24.06477463	0.297347
14	-0.17003369	9.10681720	-1.54846573		14.00000000	2.45285714	22.33772162	0.318722
15	-0.16017146	9.09906290	-1.45741019		15.00000000	2.28933333	20.83078800	0.340092
16	-0.15005098	9.12151340	-1.36869202		16.00000000	2.14625000	19.57704813	0.361563
17	-0.13985831	9.10481450	-1.27338397		17.00000000	2.02000000	18.39172529	0.382926
18	-0.13004594	9.09541320	-1.18282156		18.00000000	1.90777778	17.35202718	0.404317
19	-0.11992098	9.12326530	-1.09407092		19.00000000	1.80736842	16.48910160	0.425806
20	-0.11012351	9.09755420	-1.00185460		20.00000000	1.71700000	15.62050056	0.447183
21	-0.09992264	9.10815530	-0.91011094		21.00000000	1.63523810	14.89400252	0.468554
22	-0.09016684	9.10058020	-0.82057060		22.00000000	1.56090909	14.20517837	0.489923
23	-0.07998235	9.10532860	-0.72826556		23.00000000	1.49304348	13.59465148	0.511389
24	-0.07016329	9.10493950	-0.63883248		24.00000000	1.43083333	13.02765093	0.532775
25	-0.06002345	9.10836220	-0.54671531		25.00000000	1.37360000	12.51124632	0.554116
26	-0.04987245	9.10766790	-0.45422172		26.00000000	1.32076923	12.02912753	0.575492
27	-0.04008167	9.09787650	-0.36465807		27.00000000	1.27185185	11.57115107	0.596964
28	-0.02989792	9.09866240	-0.27203109		28.00000000	1.22642857	11.15885953	0.618335
29	-0.02010491	9.10965920	-0.18314887		29.00000000	1.18413793	10.78709300	0.639702
30	-0.00995986	9.09358120	-0.09057080		30.00000000	1.14466667	10.40911928	0.661065
31	-0.00066476	9.10401630	-0.00605200		31.00000000	1.10774194	10.08490064	0.682654
32	0.00945254	9.09810540	0.08600023		32.00000000	1.07312500	9.76340436	0.704041
33	0.01932640	9.09607410	0.17579435		33.00000000	1.04060606	9.46542984	0.725390
34	0.02942501	9.10895160	0.26803103		34.00000000	1.01000000	9.20004112	0.746754
35	0.03928919	9.10242460	0.35762690		35.00000000	0.98114286	8.93077888	0.768236
36	0.04939600	9.10268310	0.44963611		36.00000000	0.95388889	8.68294827	0.789608
37	0.05921478	9.10394000	0.53908776		37.00000000	0.92810811	8.44944053	0.810951
38	0.06938037	9.11688710	0.63253303		38.00000000	0.90368421	8.23878692	0.832329
39	0.07953928	9.09406660	0.72333548		39.00000000	0.88051282	8.00744223	0.853811
40	0.08937443	9.10748770	0.81397652		40.00000000	0.85850000	7.81877819	0.875195
41	0.09947155	9.10514640	0.90570306		41.00000000	0.83756098	7.62611530	0.896554
42	0.10932904	9.10775660	0.99574229		42.00000000	0.81761905	7.44667528	0.917917
43	0.11946487	9.10417840	1.08762949		43.00000000	0.79860465	7.27063922	0.939381
44	0.12932459	9.11401840	1.17866669		44.00000000	0.78045455	7.11307709	0.960765
45	0.13939193	9.10104270	1.26861191		45.00000000	0.76311111	6.94510681	0.982143
46	0.14921296	9.10440730	1.35849556		46.00000000	0.74652174	6.79663797	1.003495
47	0.15938450	9.09862230	1.45017937		47.00000000	0.73063830	6.64780191	1.024971
48	0.16955978	9.11147500	1.54493970		48.00000000	0.71541667	6.51850107	1.046338
49	0.17941725	9.09733390	1.63221863		49.00000000	0.70081633	6.37556013	1.067721
50	0.18953745	9.10581590	1.72589313		50.00000000	0.68680000	6.25387436	1.089200
51	0.19931604	9.09755610	1.81328886		51.00000000	0.67333333	6.12568777	1.110571
52	0.20945187	9.10225390	1.90648410		52.00000000	0.66038462	6.01098844	1.131928
53	0.21927437	9.10555170	1.99661411		53.00000000	0.64792453	5.89971029	1.153297
54	0.22943550	9.10860250	2.08983677		54.00000000	0.63592593	5.79239648	1.174762
55	0.23923121	9.10297680	2.17771615		55.00000000	0.62436364	5.68356770	1.196153
56	0.24937226	9.10913470	2.27156551		56.00000000	0.61321429	5.58585153	1.217508
57	0.25953561	9.10978890	2.36431462		57.00000000	0.60245614	5.48824826	1.238881
58	0.26934099	9.11002250	2.45370248		58.00000000	0.59206897	5.39376160	1.260364
59	0.27947906	9.10268120	2.54400879		59.00000000	0.58203390	5.29806902	1.281739
60	0.28931943	9.10722260	2.63489645		60.00000000	0.57233333	5.21236707	1.303098
61	0.29946271	9.09951880	2.72496656		61.00000000	0.56295082	5.12258157	1.324464
62	0.30927330	9.09760090	2.81364505		62.00000000	0.55387097	5.03889701	1.345932
63	0.31942028	9.10957530	2.90978309		63.00000000	0.54507937	4.96544152	1.367318
64	0.32926139	9.09150790	2.99348253		64.00000000	0.53656250	4.87816221	1.388664
65	0.33938456	9.10068040	3.08863041		65.00000000	0.52830769	4.80795946	1.410042
66	0.34920707	9.11145110	3.18178314		66.00000000	0.52030303	4.74071562	1.431525
67	0.35934365	9.09756760	3.26915315		67.00000000	0.51253731	4.66284286	1.452910
68	0.36949286	9.10220910	3.36320127		68.00000000	0.50500000	4.59661560	1.474273
69	0.37933546	9.10280800	3.45301786		69.00000000	0.49768116	4.53029604	1.495642
70	0.38947502	9.10242460	3.54516700		70.00000000	0.49057143	4.46538944	1.517109
71	0.39932579	9.09630970	3.63239106		71.00000000	0.48366197	4.39953909	1.538493
72	0.40945345	9.09802150	3.72521629		72.00000000	0.47694444	4.33925081	1.559847
73	0.41929156	9.08879280	3.81085411		73.00000000	0.47041096	4.27546774	1.581207
74	0.42943782	9.10359950	3.90942992		74.00000000	0.46405405	4.22456225	1.602683
75	0.43926552	9.08199210	3.98940598		75.00000000	0.45786667	4.15834145	1.624050
76	0.44942516	9.08975220	4.08516334		76.00000000	0.45184211	4.10713277	1.645428
77	0.45955801	9.09426880	4.17934407		77.00000000	0.44597403	4.05580767	1.666781
78	0.46940881	9.09104920	4.26741859		78.00000000	0.44025641	4.00239269	1.688252
79	0.47951785	9.06486230	4.34676328		79.00000000	0.43468354	3.94034647	1.709635
80	0.48935673	9.07876590	4.44275519		80.00000000	0.42925000	3.89706026	1.731019
81	0.49950817	9.06560330	4.52834291		81.00000000	0.42395062	3.84336812	1.752503
82	0.50930464	9.03232570	4.60020539		82.00000000	0.41878049	3.78256176	1.773887
83	0.51945162	9.03618430	4.69386057		83.00000000	0.41373494	3.73858517	1.795233
84	0.52926296	8.97577670	4.75054614		84.00000000	0.40880952	3.66938300	1.816607
85	0.53936976	8.94644260	4.82544060		85.00000000	0.40400000	3.61436281	1.838081
86	0.54951006	8.86543560	4.87164605		86.00000000	0.39930233	3.53998905	1.859454
87	0.55931616	8.78741170	4.91494137		87.00000000	0.39471264	3.46850250	1.880791
88	0.56947654	8.63857080	4.91946341		88.00000000	0.39022727	3.37100592	1.902168
89	0.57927603	8.47493740	4.90932809		89.00000000	0.38584270	3.26999270	1.923656
90	0.58939618	8.20386510	4.83532675		90.00000000	0.38155556	3.13023031	1.945038
91	0.59916437	7.87594130	4.71898341		91.00000000	0.37736264	2.97208598	1.966406
92	0.60930318	7.39948940	4.50853242		92.00000000	0.37326087	2.76193985	1.987885
93	0.61912119	6.79273990	4.20552921		93.00000000	0.36924731	2.50820095	2.009388
94	0.62921238	5.98627190	3.76663639		94.00000000	0.36531915	2.18689976	2.030784
95	0.63936013	4.94721840	3.16305420		95.00000000	0.36147368	1.78828926	2.052125
96	0.64915210	3.67809320	2.38764192		96.00000000	0.35770833	1.31568459	2.073512
97	0.65925294	2.06898280	1.36398299		97.00000000	0.35402062	0.73246257	2.094984
98	0.66892886	0.19359127	0.12949879		98.00000000	0.35040816	0.06783596	2.116361
99	0.67907584	-2.10605070	-1.43016815		99.00000000	0.34686869	-0.73052304	2.137724
100	0.68878597	-4.70052720	-3.23765719		100.00000000	0.34340000	-1.61416104	2.159100
101	0.69899178	-7.82047270	-5.46644613		101.00000000	0.34000000	-2.65896072	2.180579
04:02 04/04/2018
Test Lot:	JK-PERC
Recipe:	Recipe_YJX-LID
Cell Name:	3-16-7h
Test Order:	3
Test Condition:	Light
1	-0.29992768	9.10353950	-2.73040348		1.00000000	34.34000000	312.61554643	0.000000
2	-0.29007661	9.10459900	-2.64103121		2.00000000	17.17000000	156.32596483	0.021575
3	-0.27994570	9.10185720	-2.54802579		3.00000000	11.44666667	104.18592542	0.042958
4	-0.27017054	9.10524460	-2.45996885		4.00000000	8.58500000	78.16852489	0.064335
5	-0.26003519	9.09561160	-2.36517909		5.00000000	6.86800000	62.46866047	0.085695
6	-0.24992140	9.11184880	-2.27724601		6.00000000	5.72333333	52.15014797	0.107171
7	-0.24007182	9.10156150	-2.18502843		7.00000000	4.90571429	44.64966027	0.128546
8	-0.22988732	9.10681530	-2.09354136		8.00000000	4.29250000	39.09100468	0.149938
9	-0.22007793	9.10215380	-2.00318317		9.00000000	3.81555556	34.72977350	0.171418
10	-0.20991875	9.10194020	-1.91066791		10.00000000	3.43400000	31.25606265	0.192794
11	-0.20007810	9.09311200	-1.81933257		11.00000000	3.12181818	28.38704237	0.214149
12	-0.18996134	9.12397000	-1.73320157		12.00000000	2.86166667	26.10976082	0.235581
13	-0.18016461	9.08959390	-1.63762314		13.00000000	2.64153846	24.01051189	0.257066
14	-0.17002402	9.11647510	-1.55001974		14.00000000	2.45285714	22.36141107	0.278454
15	-0.16021241	9.09504320	-1.45713879		15.00000000	2.28933333	20.82158557	0.299804
16	-0.15004355	9.11171340	-1.36715383		16.00000000	2.14625000	19.55601488	0.321181
17	-0.13990742	9.10096550	-1.27329260		17.00000000	2.02000000	18.38395031	0.342662
18	-0.13009730	9.11340710	-1.18562966		18.00000000	1.90777778	17.38635555	0.364042
19	-0.11994182	9.09993460	-1.09146272		19.00000000	1.80736842	16.44693443	0.385404
20	-0.11010416	9.09580900	-1.00148641		20.00000000	1.71700000	15.61750405	0.406772
21	-0.09993529	9.10320190	-0.90973115		21.00000000	1.63523810	14.88590254	0.428247
22	-0.09010507	9.09533980	-0.81953625		22.00000000	1.56090909	14.19699858	0.449633
23	-0.07997342	9.10900500	-0.72847830		23.00000000	1.49304348	13.60014051	0.470976
24	-0.07017817	9.09383960	-0.63818905		24.00000000	1.43083333	13.01176883	0.492362
25	-0.06003461	9.10967060	-0.54689556		25.00000000	1.37360000	12.51304354	0.513846
26	-0.04988287	9.09881970	-0.45387524		26.00000000	1.32076923	12.01744110	0.535218
27	-0.04005265	9.10400680	-0.36463955		27.00000000	1.27185185	11.57894791	0.556560
28	-0.02987783	9.09598260	-0.27176818		28.00000000	1.22642857	11.15557295	0.577941
29	-0.02003420	9.10428520	-0.18239710		29.00000000	1.18413793	10.78072944	0.599423
30	-0.00993604	9.09890270	-0.09040710		30.00000000	1.14466667	10.41521062	0.620805
31	-0.00066402	9.10552880	-0.00604622		31.00000000	1.10774194	10.08657610	0.642289
32	0.00948082	9.09778980	0.08625454		32.00000000	1.07312500	9.76306568	0.663642
33	0.01929291	9.09938050	0.17555349		33.00000000	1.04060606	9.46887050	0.685113
34	0.02941087	9.11032490	0.26794261		34.00000000	1.01000000	9.20142815	0.706497
35	0.03924231	9.10089210	0.35713998		35.00000000	0.98114286	8.92927528	0.727876
36	0.04939302	9.09840200	0.44939752		36.00000000	0.95388889	8.67886457	0.749236
37	0.05918575	9.11466220	0.53945813		37.00000000	0.92810811	8.45939189	0.770707
38	0.06936251	9.09251120	0.63067944		38.00000000	0.90368421	8.21675881	0.792092
39	0.07948271	9.10249810	0.72349123		39.00000000	0.88051282	8.01486628	0.813480
40	0.08931712	9.09446910	0.81229180		40.00000000	0.85850000	7.80760172	0.834955
41	0.09947453	9.10731600	0.90594602		41.00000000	0.83756098	7.62793247	0.856340
42	0.10928141	9.09027670	0.99339826		42.00000000	0.81761905	7.43238338	0.877700
43	0.11940309	9.09958740	1.08651885		43.00000000	0.79860465	7.26697282	0.899069
44	0.12927620	9.11185550	1.17794605		44.00000000	0.78045455	7.11138904	0.920537
45	0.13940831	9.09587380	1.26804039		45.00000000	0.76311111	6.94116236	0.941909
46	0.14922710	9.09815500	1.35769129		46.00000000	0.74652174	6.79197049	0.963246
47	0.15936813	9.11033630	1.45189726		47.00000000	0.73063830	6.65636061	0.984629
48	0.16953447	9.09658150	1.54218412		48.00000000	0.71541667	6.50784601	1.006110
49	0.17936218	9.10721400	1.63348976		49.00000000	0.70081633	6.38248426	1.027483
50	0.18948089	9.09773640	1.72384719		50.00000000	0.68680000	6.24832536	1.048837
51	0.19924386	9.10526180	1.81416751		51.00000000	0.67333333	6.13087628	1.070209
52	0.20942359	9.10218050	1.90621132		52.00000000	0.66038462	6.01093997	1.091686
53	0.21927066	9.09549810	1.99437587		53.00000000	0.64792453	5.89319632	1.113125
54	0.22940426	9.11948590	2.09204891		54.00000000	0.63592593	5.79931751	1.134484
55	0.23921707	9.09707070	2.17617460		55.00000000	0.62436364	5.67988014	1.155854
56	0.24939831	9.11205580	2.27253132		56.00000000	0.61321429	5.58764279	1.177348
57	0.25953189	9.09851260	2.36135417		57.00000000	0.60245614	5.48145478	1.198717
58	0.26937374	9.10479930	2.45259384		58.00000000	0.59206897	5.39066910	1.220081
59	0.27949992	9.09932330	2.54326013		59.00000000	0.58203390	5.29611461	1.241464
60	0.28930974	9.09698870	2.63184744		60.00000000	0.57233333	5.20650987	1.262937
61	0.29942697	9.09289840	2.72265902		61.00000000	0.56295082	5.11885461	1.284326
62	0.30926213	9.09551810	2.81289930		62.00000000	0.55387097	5.03774341	1.305686
63	0.31943145	9.11213400	2.91070218		63.00000000	0.54507937	4.96683622	1.327050
64	0.32924727	9.09395500	2.99415986		64.00000000	0.53656250	4.87947523	1.348521
65	0.33939499	9.09950730	3.08832719		65.00000000	0.52830769	4.80733970	1.369893
66	0.34918252	9.11206250	3.18177295		66.00000000	0.52030303	4.74103373	1.391277
67	0.35933471	9.09484290	3.26809274		67.00000000	0.51253731	4.66144635	1.412632
68	0.36949435	9.10895440	3.36570719		68.00000000	0.50500000	4.60002197	1.434121
69	0.37934738	9.10123630	3.45253015		69.00000000	0.49768116	4.52951383	1.455486
70	0.38947800	9.09428690	3.54202467		70.00000000	0.49057143	4.46139732	1.476873
71	0.39928636	9.09293170	3.63068360		71.00000000	0.48366197	4.39790528	1.498343
72	0.40943483	9.10149670	3.72646975		72.00000000	0.47694444	4.34090829	1.519708
73	0.41925287	9.09436700	3.81283947		73.00000000	0.47041096	4.27808990	1.541049
74	0.42943409	9.09266280	3.90469938		74.00000000	0.46405405	4.21948703	1.562422
75	0.43922088	9.08776000	3.99153394		75.00000000	0.45786667	4.16098238	1.583913
76	0.44939318	9.09001640	4.08499138		76.00000000	0.45184211	4.10725215	1.605296
77	0.45949477	9.09008790	4.17684785		77.00000000	0.44597403	4.05394310	1.626640
78	0.46938053	9.08976940	4.26656078		78.00000000	0.44025641	4.00182925	1.648025
79	0.47951114	9.07028480	4.34930260		79.00000000	0.43468354	3.94270354	1.669497
80	0.48935002	9.07863430	4.44262988		80.00000000	0.42925000	3.89700377	1.690874
81	0.49946353	9.05135920	4.52082382		81.00000000	0.42395062	3.83732932	1.712230
82	0.50930238	9.04401970	4.60614076		82.00000000	0.41878049	3.78745898	1.733601
83	0.51943076	9.00518800	4.67757165		83.00000000	0.41373494	3.72576091	1.755091
84	0.52924657	9.00005050	4.76324586		84.00000000	0.40880952	3.67930636	1.776480
85	0.53937942	8.94147590	4.82284808		85.00000000	0.40400000	3.61235626	1.797827
86	0.54950410	8.86992170	4.87405834		86.00000000	0.39930233	3.54178036	1.819200
87	0.55933255	8.79121300	4.91721158		87.00000000	0.39471264	3.47000292	1.840689
88	0.56945050	8.65590570	4.92910983		88.00000000	0.39022727	3.37777047	1.862071
89	0.57927603	8.49247070	4.91948471		89.00000000	0.38584270	3.27675780	1.883444
90	0.58941627	8.23226930	4.85223346		90.00000000	0.38155556	3.14106809	1.904824
91	0.59920007	7.91175270	4.74072277		91.00000000	0.37736264	2.98559987	1.926300
92	0.60933369	7.44449810	4.53618350		92.00000000	0.37326087	2.77873983	1.947683
93	0.61913538	6.85317660	4.24304410		93.00000000	0.36924731	2.53051704	1.969048
94	0.62924886	6.03359940	3.79663554		94.00000000	0.36531915	2.20418940	1.990511
95	0.63936013	5.00832270	3.20212185		95.00000000	0.36147368	1.81037686	2.012017
96	0.64915359	3.72840070	2.42030470		96.00000000	0.35770833	1.33368000	2.033400
97	0.65923733	2.10237360	1.38596316		97.00000000	0.35402062	0.74428360	2.054790
98	0.66896009	0.18771204	0.12557186		98.00000000	0.35040816	0.06577583	2.076146
99	0.67903489	-2.18123220	-1.48113277		99.00000000	0.34686869	-0.75660115	2.097615
100	0.68877852	-4.86858700	-3.35337815		100.00000000	0.34340000	-1.67187278	2.118988
101	0.69899845	-8.14460560	-5.69306669		101.00000000	0.34000000	-2.76916590	2.140376
04:02 04/04/2018
Test Lot:	JK-PERC
Recipe:	Recipe_YJX-LID
Cell Name:	3-16-7h
Test Order:	4
Test Condition:	Light
1	-0.29989824	9.09922790	-2.72884243		1.00000000	34.34000000	312.46748609	0.000000
2	-0.29006261	9.09688660	-2.63866667		2.00000000	17.17000000	156.19354292	0.061782
3	-0.27991441	9.10268120	-2.54797164		3.00000000	11.44666667	104.19535747	0.083195
4	-0.27011153	9.10302830	-2.45883290		4.00000000	8.58500000	78.14949796	0.104681
5	-0.25996926	9.10488410	-2.36698998		5.00000000	6.86800000	62.53234400	0.126129
6	-0.24981362	9.09671020	-2.27248211		6.00000000	5.72333333	52.06350471	0.147527
7	-0.23998024	9.10599520	-2.18525891		7.00000000	4.90571429	44.67141074	0.168885
8	-0.22983649	9.09630780	-2.09066346		8.00000000	4.29250000	39.04590123	0.190372
9	-0.22001353	9.11123940	-2.00459594		9.00000000	3.81555556	34.76444011	0.211759
10	-0.20984598	9.09876060	-1.90933833		10.00000000	3.43400000	31.24514390	0.233139
11	-0.20005576	9.10678670	-1.82186513		11.00000000	3.12181818	28.42973230	0.254634
12	-0.18989712	9.10942360	-1.72985331		12.00000000	2.86166667	26.06813387	0.276016
13	-0.18015678	9.10307030	-1.63997983		13.00000000	2.64153846	24.04611032	0.297366
14	-0.16995795	9.10155770	-1.54688209		14.00000000	2.45285714	22.32482082	0.318737
15	-0.16013797	9.10271640	-1.45769053		15.00000000	2.28933333	20.83915208	0.340203
16	-0.15005004	9.10803510	-1.36666103		16.00000000	2.14625000	19.54812033	0.361568
17	-0.13990556	9.10512920	-1.27385820		17.00000000	2.02000000	18.39236098	0.382927
18	-0.13006474	9.10593030	-1.18436046		18.00000000	1.90777778	17.37209147	0.404301
19	-0.11993141	9.11455150	-1.09312101		19.00000000	1.80736842	16.47335255	0.425773
20	-0.11008091	9.09120940	-1.00076860		20.00000000	1.71700000	15.60960654	0.447149
21	-0.09993567	9.09917640	-0.90933232		21.00000000	1.63523810	14.87931988	0.468499
22	-0.09007104	9.09994600	-0.81964157		22.00000000	1.56090909	14.20418844	0.489873
23	-0.07996674	9.10828500	-0.72835985		23.00000000	1.49304348	13.59906552	0.511361
24	-0.07016387	9.10172650	-0.63861234		24.00000000	1.43083333	13.02305367	0.532729
25	-0.06001194	9.11146070	-0.54679641		25.00000000	1.37360000	12.51550242	0.554073
26	-0.04984066	9.09277440	-0.45318983		26.00000000	1.32076923	12.00945665	0.575457
27	-0.04003109	9.10886760	-0.36463790		27.00000000	1.27185185	11.58513013	0.596934
28	-0.02988958	9.09780790	-0.27192962		28.00000000	1.22642857	11.15781155	0.618312
29	-0.02003461	9.10464380	-0.18240800		29.00000000	1.18413793	10.78115407	0.639669
30	-0.00991915	9.10039620	-0.09026818		30.00000000	1.14466667	10.41692018	0.661047
31	-0.00067895	9.10249900	-0.00618019		31.00000000	1.10774194	10.08321986	0.682639
32	0.00948914	9.09466360	0.08630057		32.00000000	1.07312500	9.75971088	0.704017
33	0.01929099	9.10832500	0.17570858		33.00000000	1.04060606	9.47817820	0.725374
34	0.02945007	9.10493760	0.26814107		34.00000000	1.01000000	9.19598698	0.746740
35	0.03928392	9.10015770	0.35748983		35.00000000	0.98114286	8.92855473	0.768212
36	0.04944300	9.09399320	0.44963433		36.00000000	0.95388889	8.67465907	0.789594
37	0.05928355	9.10912610	0.54002131		37.00000000	0.92810811	8.45425379	0.810976
38	0.06941584	9.08840560	0.63087929		38.00000000	0.90368421	8.21304864	0.832324
39	0.07952952	9.10556130	0.72416096		39.00000000	0.88051282	8.01756346	0.853790
40	0.08933881	9.11403270	0.81423683		40.00000000	0.85850000	7.82439707	0.875181
41	0.09951725	9.09649940	0.90525860		41.00000000	0.83756098	7.61887291	0.896559
42	0.10932579	9.10996720	0.99595436		42.00000000	0.81761905	7.44848271	0.918034
43	0.11948041	9.09985260	1.08725412		43.00000000	0.79860465	7.26718461	0.939417
44	0.12929043	9.10357380	1.17700497		44.00000000	0.78045455	7.10492555	0.960763
45	0.13943836	9.10100360	1.26902902		45.00000000	0.76311111	6.94507697	0.982143
46	0.14928187	9.10088060	1.35859647		46.00000000	0.74652174	6.79400521	1.003617
47	0.15941864	9.09338860	1.44965564		47.00000000	0.73063830	6.64397797	1.024990
48	0.16955838	9.10394100	1.54364949		48.00000000	0.71541667	6.51311112	1.046342
49	0.17940859	9.11362080	1.63506186		49.00000000	0.70081633	6.38697425	1.067716
50	0.18951930	9.09443380	1.72357073		50.00000000	0.68680000	6.24605713	1.089193
51	0.19930997	9.10975740	1.81566547		51.00000000	0.67333333	6.13390332	1.110586
52	0.20946310	9.10097890	1.90631925		52.00000000	0.66038462	6.01014645	1.131956
53	0.21928802	9.09211060	1.99379093		53.00000000	0.64792453	5.89100147	1.153331
54	0.22941139	9.10354040	2.08845586		54.00000000	0.63592593	5.78917736	1.174808
55	0.23925714	9.10276130	2.17790063		55.00000000	0.62436364	5.68343315	1.196180
56	0.24940655	9.09825040	2.26916324		56.00000000	0.61321429	5.57917712	1.217520
57	0.25951725	9.10297490	2.36237901		57.00000000	0.60245614	5.48414312	1.238900
58	0.26938385	9.10434630	2.45256386		58.00000000	0.59206897	5.39040090	1.260388
59	0.27950349	9.08916850	2.54045432		59.00000000	0.58203390	5.29020417	1.281767
60	0.28932691	9.10708520	2.63492482		60.00000000	0.57233333	5.21228843	1.303111
61	0.29948825	9.09581850	2.72409076		61.00000000	0.56295082	5.12049848	1.324484
62	0.30930051	9.11433510	2.81906849		62.00000000	0.55387097	5.04816560	1.345952
63	0.31945288	9.09958840	2.90688972		63.00000000	0.54507937	4.95999787	1.367340
64	0.32927409	9.10753440	2.99887510		64.00000000	0.53656250	4.88676143	1.388702
65	0.33944952	9.08532330	3.08400863		65.00000000	0.52830769	4.79984619	1.410071
66	0.34925288	9.10584550	3.18024277		66.00000000	0.52030303	4.73779901	1.431549
67	0.35940078	9.08785630	3.26618264		67.00000000	0.51253731	4.65786545	1.452922
68	0.36960453	9.09330180	3.36092554		68.00000000	0.50500000	4.59211741	1.474316
69	0.37940192	9.09572220	3.45093447		69.00000000	0.49768116	4.52676957	1.495668
70	0.38954982	9.10725690	3.54773029		70.00000000	0.49057143	4.46776003	1.517145
71	0.39937028	9.10503770	3.63628146		71.00000000	0.48366197	4.40376049	1.538533
72	0.40948397	9.08257770	3.71916997		72.00000000	0.47694444	4.33188498	1.559902
73	0.41930515	9.11877730	3.82355028		73.00000000	0.47041096	4.28957277	1.581381
74	0.42945606	9.08023830	3.89956336		74.00000000	0.46405405	4.21372139	1.602743
75	0.43928319	9.11064340	4.00215250		75.00000000	0.45786667	4.17145992	1.624107
76	0.44945046	9.08831210	4.08474605		76.00000000	0.45184211	4.10648207	1.645489
77	0.45959020	9.09382440	4.17943257		77.00000000	0.44597403	4.05560948	1.666959
78	0.46943745	9.08580880	4.26521891		78.00000000	0.44025641	4.00008557	1.688333
79	0.47957197	9.07644650	4.35280933		79.00000000	0.43468354	3.94538193	1.709687
80	0.48939243	9.07029150	4.43893200		80.00000000	0.42925000	3.89342263	1.731055
81	0.49951580	9.05420680	4.52271935		81.00000000	0.42395062	3.83853656	1.752533
82	0.50932580	9.05073740	4.60977407		82.00000000	0.41878049	3.79027222	1.773921
83	0.51948118	9.01366810	4.68243094		83.00000000	0.41373494	3.72926943	1.795273
84	0.52923983	8.98440650	4.75490577		84.00000000	0.40880952	3.67291094	1.816646
85	0.53940785	8.94328020	4.82407554		85.00000000	0.40400000	3.61308520	1.838127
86	0.54956698	8.88312240	4.88187075		86.00000000	0.39930233	3.54705143	1.859502
87	0.55935764	8.78286460	4.91276242		87.00000000	0.39471264	3.46670771	1.880878
88	0.56950629	8.67419910	4.94001095		88.00000000	0.39022727	3.38490906	1.902252
89	0.57931334	8.48121360	4.91328018		89.00000000	0.38584270	3.27241433	1.923736
90	0.58942032	8.23535820	4.85408747		90.00000000	0.38155556	3.14224667	1.945121
91	0.59924376	7.90784030	4.73872395		91.00000000	0.37736264	2.98412347	1.966468
92	0.60936046	7.44458340	4.53643477		92.00000000	0.37326087	2.77877167	1.987927
93	0.61914068	6.86005880	4.24734147		93.00000000	0.36924731	2.53305827	2.009428
94	0.62926036	6.05052570	3.80735598		94.00000000	0.36531915	2.21037290	2.030808
95	0.63937253	5.00717690	3.20145136		95.00000000	0.36147368	1.80996268	2.052166
96	0.64918923	3.73487000	2.42463738		96.00000000	0.35770833	1.33599412	2.073537
97	0.65927839	2.09813980	1.38325823		97.00000000	0.35402062	0.74278475	2.095009
98	0.66900057	0.18528077	0.12395294		98.00000000	0.35040816	0.06492389	2.116397
99	0.67909938	-2.18625710	-1.48468584		99.00000000	0.34686869	-0.75834413	2.137828
100	0.68881267	-4.88411090	-3.36423747		100.00000000	0.34340000	-1.67720368	2.159182
101	0.69901639	-8.15120510	-5.69782596		101.00000000	0.34000000	-2.77140973	2.180667
