# Supplementary material for: Study on the Electrical Injection Regeneration of Industrialized B-Doped Czochralski Silicon PERC Solar Cells
Source: Hindawi journal article supplement (doi:10.1155/2019/5357370), 2019-06-20
Supplement: f1 [file 5357370.f1.zip › section3.3/IVRawData_3-16-8h.csv]

05:03 04/04/2018
Test Lot:	JK-PERC
Recipe:	Recipe_YJX-LID
Cell Name:	3-16-8h
Test Order:	2
Test Condition:	Light
1	-0.29988635	9.09229760	-2.72665594		1.00000000	34.34000000	312.22949958	0.000000
2	-0.29009101	9.09215740	-2.63755312		2.00000000	17.17000000	156.11234256	0.061786
3	-0.27995259	9.09282970	-2.54556122		3.00000000	11.44666667	104.08259063	0.083208
4	-0.27015129	9.09261130	-2.45638067		4.00000000	8.58500000	78.06006801	0.104700
5	-0.25996968	9.10576060	-2.36722167		5.00000000	6.86800000	62.53836380	0.126065
6	-0.24980596	9.09329030	-2.27155811		6.00000000	5.72333333	52.04393148	0.147420
7	-0.23999426	9.08982090	-2.18150484		7.00000000	4.90571429	44.59206424	0.168797
8	-0.22982828	9.10142610	-2.09176511		8.00000000	4.29250000	39.06787153	0.190272
9	-0.22000392	9.09991930	-2.00201792		9.00000000	3.81555556	34.72124764	0.211658
10	-0.20987666	9.09356120	-1.90852625		10.00000000	3.43400000	31.22728916	0.233077
11	-0.20006198	9.10301490	-1.82116718		11.00000000	3.12181818	28.41795742	0.254451
12	-0.18990493	9.07652850	-1.72367751		12.00000000	2.86166667	25.97399906	0.275941
13	-0.18011481	9.10363100	-1.63969877		13.00000000	2.64153846	24.04759143	0.297335
14	-0.16995777	9.09008790	-1.54493107		14.00000000	2.45285714	22.29668703	0.318720
15	-0.16014086	9.09001920	-1.45568349		15.00000000	2.28933333	20.81008396	0.340064
16	-0.15000838	9.08749770	-1.36320081		16.00000000	2.14625000	19.50404194	0.361546
17	-0.13985357	9.10370730	-1.27318597		17.00000000	2.02000000	18.38948875	0.382910
18	-0.13001879	9.08472440	-1.18118487		18.00000000	1.90777778	17.33163533	0.404291
19	-0.11985654	9.09910960	-1.09058779		19.00000000	1.80736842	16.44544335	0.425773
20	-0.11005376	9.10599230	-1.00214869		20.00000000	1.71700000	15.63498878	0.447153
21	-0.09990417	9.08603950	-0.90773319		21.00000000	1.63523810	14.85783793	0.468511
22	-0.09007385	9.10137650	-0.81979606		22.00000000	1.56090909	14.20642132	0.489877
23	-0.07993170	9.09051040	-0.72661994		23.00000000	1.49304348	13.57252727	0.511368
24	-0.07010064	9.07916360	-0.63645521		24.00000000	1.43083333	12.99076992	0.532736
25	-0.05995700	9.09888940	-0.54554209		25.00000000	1.37360000	12.49823448	0.554082
26	-0.04983122	9.09146790	-0.45303889		26.00000000	1.32076923	12.00773106	0.575465
27	-0.03999644	9.08836080	-0.36350209		27.00000000	1.27185185	11.55904851	0.596944
28	-0.02989447	9.09981730	-0.27203424		28.00000000	1.22642857	11.16027593	0.618318
29	-0.02005970	9.07228760	-0.18198736		29.00000000	1.18413793	10.74283987	0.639680
30	-0.00991382	9.11126420	-0.09032743		30.00000000	1.14466667	10.42936042	0.661060
31	-0.00064990	9.08523650	-0.00590450		31.00000000	1.10774194	10.06409746	0.682647
32	0.00947121	9.08508110	0.08604672		32.00000000	1.07312500	9.74942766	0.704036
33	0.01930273	9.09753420	0.17560723		33.00000000	1.04060606	9.46694923	0.725389
34	0.02941185	9.08522320	0.26721321		34.00000000	1.01000000	9.17607543	0.746771
35	0.03927090	9.10009100	0.35736880		35.00000000	0.98114286	8.92848928	0.768253
36	0.04944478	9.07952400	0.44893503		36.00000000	0.95388889	8.66085706	0.789628
37	0.05921526	9.10540490	0.53917895		37.00000000	0.92810811	8.45080012	0.810988
38	0.06936383	9.08158680	0.62993366		38.00000000	0.90368421	8.20688660	0.832359
39	0.07953993	9.09216880	0.72319049		39.00000000	0.88051282	8.00577119	0.853835
40	0.08933722	9.08581540	0.81170144		40.00000000	0.85850000	7.80017252	0.875222
41	0.09950960	9.10079860	0.90561680		41.00000000	0.83756098	7.62247375	0.896577
42	0.10929869	9.08815000	0.99332289		42.00000000	0.81761905	7.43064455	0.917938
43	0.11949117	9.09000590	1.08617544		43.00000000	0.79860465	7.25932099	0.939410
44	0.12932046	9.09037970	1.17557208		44.00000000	0.78045455	7.09462816	0.960778
45	0.13946605	9.08878420	1.26757683		45.00000000	0.76311111	6.93575221	0.982159
46	0.14927597	9.08503820	1.35617789		46.00000000	0.74652174	6.78217852	1.003626
47	0.15942156	9.07937720	1.44744848		47.00000000	0.73063830	6.63374070	1.025110
48	0.16955599	9.11082840	1.54479553		48.00000000	0.71541667	6.51803848	1.046507
49	0.17938156	9.07739260	1.62831685		49.00000000	0.70081633	6.36158494	1.067884
50	0.18953310	9.10078530	1.72490005		50.00000000	0.68680000	6.25041934	1.089369
51	0.19933335	9.08113570	1.81017320		51.00000000	0.67333333	6.11463137	1.110745
52	0.20945737	9.09402470	1.90481050		52.00000000	0.66038462	6.00555400	1.132088
53	0.21927847	9.09358790	1.99402804		53.00000000	0.64792453	5.89195865	1.153463
54	0.22944638	9.08041000	2.08346720		54.00000000	0.63592593	5.77446814	1.174952
55	0.23927046	9.08617970	2.17405440		55.00000000	0.62436364	5.67308020	1.196330
56	0.24941307	9.09005930	2.26717960		56.00000000	0.61321429	5.57415422	1.217678
57	0.25953633	9.09114270	2.35948181		57.00000000	0.60245614	5.47701474	1.239055
58	0.26935521	9.08580880	2.44730994		58.00000000	0.59206897	5.37942542	1.260538
59	0.27952981	9.07735250	2.53739062		59.00000000	0.58203390	5.28332686	1.281909
60	0.28934124	9.09474090	2.63148361		60.00000000	0.57233333	5.20522338	1.303278
61	0.29946077	9.08539490	2.72071935		61.00000000	0.56295082	5.11463051	1.324653
62	0.30930942	9.08457760	2.80994543		62.00000000	0.55387097	5.03168379	1.346125
63	0.31944382	9.09580520	2.90559876		63.00000000	0.54507937	4.95793572	1.367497
64	0.32927164	9.08725550	2.99217552		64.00000000	0.53656250	4.87588053	1.388835
65	0.33941275	9.08867070	3.08481072		65.00000000	0.52830769	4.80161464	1.410217
66	0.34920037	9.09761140	3.17688927		66.00000000	0.52030303	4.73351478	1.431696
67	0.35936233	9.08676150	3.26543978		67.00000000	0.51253731	4.65730433	1.453070
68	0.36950418	9.09124280	3.35925222		68.00000000	0.50500000	4.59107761	1.474444
69	0.37934688	9.07998750	3.44446493		69.00000000	0.49768116	4.51893871	1.495818
70	0.38949916	9.08792020	3.53973728		70.00000000	0.49057143	4.45827400	1.517298
71	0.39932472	9.08403970	3.62748161		71.00000000	0.48366197	4.39360455	1.538694
72	0.40948147	9.09516810	3.72430280		72.00000000	0.47694444	4.33788990	1.560062
73	0.41930407	9.08725930	3.81032481		73.00000000	0.47041096	4.27474636	1.581414
74	0.42944074	9.07023330	3.89512770		74.00000000	0.46405405	4.20907853	1.602884
75	0.43924025	9.09162330	3.99340689		75.00000000	0.45786667	4.16275125	1.624253
76	0.44941634	9.08855250	4.08454400		76.00000000	0.45184211	4.10659070	1.645635
77	0.45956418	9.07694050	4.17143672		77.00000000	0.44597403	4.04807970	1.666981
78	0.46941876	9.06217960	4.25395711		78.00000000	0.44025641	3.98968266	1.688455
79	0.47956806	9.06124110	4.34548182		79.00000000	0.43468354	3.93877240	1.709833
80	0.48940554	9.06803230	4.43794524		80.00000000	0.42925000	3.89245286	1.731223
81	0.49951985	9.04537200	4.51834286		81.00000000	0.42395062	3.83479104	1.752698
82	0.50932682	9.02212140	4.59520840		82.00000000	0.41878049	3.77828840	1.774083
83	0.51946199	9.00761700	4.67911465		83.00000000	0.41373494	3.72676588	1.795435
84	0.52928531	8.96695800	4.74607914		84.00000000	0.40880952	3.66577783	1.816811
85	0.53938478	8.91441350	4.80829896		85.00000000	0.40400000	3.60142305	1.838300
86	0.54954302	8.86537170	4.87190314		86.00000000	0.39930233	3.53996354	1.859679
87	0.55936784	8.75964450	4.89986342		87.00000000	0.39471264	3.45754244	1.881017
88	0.56952089	8.62881760	4.91429188		88.00000000	0.39022727	3.36719996	1.902394
89	0.57928985	8.44827370	4.89399920		89.00000000	0.38584270	3.25970471	1.923880
90	0.58944064	8.18017960	4.82173030		90.00000000	0.38155556	3.12119297	1.945266
91	0.59925658	7.84342530	4.70022422		91.00000000	0.37736264	2.95981566	1.966618
92	0.60933965	7.36003260	4.48475969		92.00000000	0.37326087	2.74721217	1.988090
93	0.61911011	6.77099700	4.19199270		93.00000000	0.36924731	2.50017244	2.009585
94	0.62926018	5.93097070	3.73212369		94.00000000	0.36531915	2.16669717	2.030963
95	0.63940650	4.90107300	3.13377793		95.00000000	0.36147368	1.77160891	2.052310
96	0.64915913	3.63172510	2.35756751		96.00000000	0.35770833	1.29909833	2.073688
97	0.65929580	2.03853630	1.34399842		97.00000000	0.35402062	0.72168388	2.095168
98	0.66896206	0.16676098	0.11155677		98.00000000	0.35040816	0.05843441	2.116539
99	0.67910844	-2.10229330	-1.42768512		99.00000000	0.34686869	-0.72921972	2.137896
100	0.68884093	-4.67415520	-3.21974941		100.00000000	0.34340000	-1.60510490	2.159268
101	0.69904160	-7.75502300	-5.42108369		101.00000000	0.34000000	-2.63670782	2.180740
05:03 04/04/2018
Test Lot:	JK-PERC
Recipe:	Recipe_YJX-LID
Cell Name:	3-16-8h
Test Order:	3
Test Condition:	Light
1	-0.29991090	9.09221940	-2.72685570		1.00000000	34.34000000	312.22681420	0.000000
2	-0.29003519	9.08945180	-2.63626088		2.00000000	17.17000000	156.06588741	0.021590
3	-0.27990642	9.09756090	-2.54646570		3.00000000	11.44666667	104.13674710	0.043020
4	-0.27012599	9.08714580	-2.45467426		4.00000000	8.58500000	78.01314669	0.064439
5	-0.26001436	9.09145450	-2.36390872		5.00000000	6.86800000	62.44010951	0.085826
6	-0.24986401	9.09708020	-2.27303294		6.00000000	5.72333333	52.06562234	0.107321
7	-0.24002923	9.08457760	-2.18056417		7.00000000	4.90571429	44.56634211	0.128704
8	-0.22985284	9.09163190	-2.08973741		8.00000000	4.29250000	39.02582993	0.150057
9	-0.22003146	9.08853440	-1.99976349		9.00000000	3.81555556	34.67780792	0.171440
10	-0.20987962	9.09377290	-1.90859760		10.00000000	3.43400000	31.22801614	0.192920
11	-0.20004411	9.09388450	-1.81917803		11.00000000	3.12181818	28.38945398	0.214293
12	-0.18992205	9.09060380	-1.72650611		12.00000000	2.86166667	26.01427787	0.235652
13	-0.18015723	9.08997630	-1.63762495		13.00000000	2.64153846	24.01152201	0.257033
14	-0.16999349	9.08777810	-1.54486312		14.00000000	2.45285714	22.29102143	0.278516
15	-0.16018775	9.09256460	-1.45651747		15.00000000	2.28933333	20.81591122	0.299898
16	-0.15002921	9.08703040	-1.36331999		16.00000000	2.14625000	19.50303900	0.321249
17	-0.13988334	9.09443860	-1.27216045		17.00000000	2.02000000	18.37076597	0.342628
18	-0.13005005	9.09345720	-1.18260456		18.00000000	1.90777778	17.34829557	0.364100
19	-0.11990342	9.08518980	-1.08934533		19.00000000	1.80736842	16.42028514	0.385485
20	-0.11009396	9.10058210	-1.00191912		20.00000000	1.71700000	15.62569947	0.406846
21	-0.09991905	9.09317400	-0.90858132		21.00000000	1.63523810	14.86950453	0.428213
22	-0.09010661	9.09375760	-0.81940763		22.00000000	1.56090909	14.19452891	0.449701
23	-0.08000464	9.09212210	-0.72741196		23.00000000	1.49304348	13.57493360	0.471085
24	-0.07012818	9.08723550	-0.63727129		24.00000000	1.43083333	13.00231946	0.492428
25	-0.05996668	9.11783120	-0.54676603		25.00000000	1.37360000	12.52425294	0.513804
26	-0.04983419	9.07950880	-0.45246998		26.00000000	1.32076923	11.99193585	0.535282
27	-0.04001803	9.09287830	-0.36387904		27.00000000	1.27185185	11.56479410	0.556669
28	-0.02985279	9.08619790	-0.27124839		28.00000000	1.22642857	11.14357271	0.578022
29	-0.02007384	9.08298020	-0.18233029		29.00000000	1.18413793	10.75550138	0.599385
30	-0.00987810	9.09041980	-0.08979603		30.00000000	1.14466667	10.40550053	0.620858
31	-0.00064320	9.09762760	-0.00585161		31.00000000	1.10774194	10.07782361	0.642375
32	0.00950098	9.09412190	0.08640307		32.00000000	1.07312500	9.75912956	0.663768
33	0.01929975	9.08916190	0.17541856		33.00000000	1.04060606	9.45823696	0.685117
34	0.02948479	9.09661960	0.26821188		34.00000000	1.01000000	9.18758580	0.706592
35	0.03931556	9.08692360	0.35725748		35.00000000	0.98114286	8.91557018	0.727961
36	0.04946710	9.08116630	0.44921898		36.00000000	0.95388889	8.66242363	0.749348
37	0.05923982	9.09362600	0.53870479		37.00000000	0.92810811	8.43986802	0.770840
38	0.06934671	9.09492400	0.63070307		38.00000000	0.90368421	8.21893921	0.792214
39	0.07954663	9.09520630	0.72349301		39.00000000	0.88051282	8.00844575	0.813563
40	0.08933796	9.09316540	0.81236485		40.00000000	0.85850000	7.80648250	0.834948
41	0.09951853	9.09764290	0.90538405		41.00000000	0.83756098	7.61983066	0.856434
42	0.10929795	9.09645650	0.99422405		42.00000000	0.81761905	7.43743610	0.877813
43	0.11940558	9.09035300	1.08543887		43.00000000	0.79860465	7.25959819	0.899177
44	0.12929590	9.09861090	1.17641309		44.00000000	0.78045455	7.10105223	0.920552
45	0.13944744	9.08201030	1.26646309		45.00000000	0.76311111	6.93058297	0.942019
46	0.14927895	9.10068890	1.35854128		46.00000000	0.74652174	6.79386210	0.963393
47	0.15941562	9.09091760	1.44923427		47.00000000	0.73063830	6.64217256	0.984735
48	0.16950911	9.08112620	1.53933362		48.00000000	0.71541667	6.49678904	1.006118
49	0.17936221	9.08719730	1.62989979		49.00000000	0.70081633	6.36845623	1.027591
50	0.18953310	9.08479400	1.72186917		50.00000000	0.68680000	6.23943652	1.048968
51	0.19929764	9.08261110	1.81014296		51.00000000	0.67333333	6.11562481	1.070327
52	0.20945290	9.08207700	1.90226737		52.00000000	0.66038462	5.99766393	1.091701
53	0.21927847	9.09176830	1.99362904		53.00000000	0.64792453	5.89077969	1.113173
54	0.22939429	9.08420660	2.08386512		54.00000000	0.63592593	5.77688249	1.134564
55	0.23929279	9.09184360	2.17561262		55.00000000	0.62436364	5.67661653	1.155914
56	0.24940266	9.09083560	2.26727858		56.00000000	0.61321429	5.57463026	1.177277
57	0.25953707	9.08533670	2.35798167		57.00000000	0.60245614	5.47351688	1.198761
58	0.26936635	9.10898970	2.45365531		58.00000000	0.59206897	5.39315011	1.220134
59	0.27951121	9.07952020	2.53782768		59.00000000	0.58203390	5.28458854	1.241508
60	0.28935239	9.09130480	2.63059077		60.00000000	0.57233333	5.20325678	1.262880
61	0.29948533	9.09445380	2.72365550		61.00000000	0.56295082	5.11973022	1.284353
62	0.30928782	9.09772110	2.81381433		62.00000000	0.55387097	5.03896359	1.305751
63	0.31946245	9.08631130	2.90273527		63.00000000	0.54507937	4.95276079	1.327134
64	0.32929173	9.08370780	2.99118986		64.00000000	0.53656250	4.87397697	1.348475
65	0.33940309	9.08720210	3.08422447		65.00000000	0.52830769	4.80083877	1.369940
66	0.34922269	9.06807040	3.16677594		66.00000000	0.52030303	4.71814451	1.391324
67	0.35939136	9.09068680	3.26711429		67.00000000	0.51253731	4.65931619	1.412701
68	0.36953768	9.08201220	3.35614572		68.00000000	0.50500000	4.58641616	1.434174
69	0.37934688	9.08982750	3.44819770		69.00000000	0.49768116	4.52383589	1.455546
70	0.38952595	9.08061700	3.53713596		70.00000000	0.49057143	4.45469125	1.476895
71	0.39930165	9.09101100	3.63005569		71.00000000	0.48366197	4.39697631	1.498272
72	0.40946808	9.07346730	3.71529523		72.00000000	0.47694444	4.32753982	1.519747
73	0.41927728	9.08377460	3.80862031		73.00000000	0.47041096	4.27310712	1.541136
74	0.42942956	9.07945350	3.89898572		74.00000000	0.46405405	4.21335721	1.562489
75	0.43926406	9.08237740	3.98956197		75.00000000	0.45786667	4.15851787	1.583857
76	0.44940594	9.06654170	4.07455770		76.00000000	0.45184211	4.09664529	1.605335
77	0.45952621	9.08401010	4.17434073		77.00000000	0.44597403	4.05123256	1.626707
78	0.46945003	9.06626320	4.25615753		78.00000000	0.44025641	3.99148049	1.648055
79	0.47959188	9.07275010	4.35121728		79.00000000	0.43468354	3.94377517	1.669436
80	0.48934153	9.04759310	4.42736305		80.00000000	0.42925000	3.88367934	1.690915
81	0.49950498	9.05209730	4.52156768		81.00000000	0.42395062	3.83764224	1.712290
82	0.50933796	9.02056880	4.59451811		82.00000000	0.41878049	3.77763820	1.733643
83	0.51943743	9.01226140	4.68130590		83.00000000	0.41373494	3.72868743	1.755019
84	0.52923471	8.96543790	4.74482093		84.00000000	0.40880952	3.66515640	1.776503
85	0.53937137	8.92319010	4.81291327		85.00000000	0.40400000	3.60496880	1.797884
86	0.54954451	8.85460570	4.86599995		86.00000000	0.39930233	3.53566465	1.819229
87	0.55932689	8.74957280	4.89387134		87.00000000	0.39471264	3.45356701	1.840607
88	0.56948811	8.63353250	4.91669411		88.00000000	0.39022727	3.36903984	1.862081
89	0.57928765	8.43672660	4.88729153		89.00000000	0.38584270	3.25524934	1.883461
90	0.58943176	8.19463060	4.83017554		90.00000000	0.38155556	3.12670683	1.904829
91	0.59925359	7.82622770	4.68989505		91.00000000	0.37736264	2.95332593	1.926195
92	0.60934037	7.37807080	4.49575639		92.00000000	0.37326087	2.75394512	1.947664
93	0.61915106	6.77994250	4.19780859		93.00000000	0.36924731	2.50347554	1.969051
94	0.62926018	5.95345540	3.74627242		94.00000000	0.36531915	2.17491126	1.990534
95	0.63937676	4.90016510	3.13305169		95.00000000	0.36147368	1.77128073	2.011926
96	0.64917624	3.64699980	2.36754562		96.00000000	0.35770833	1.30456222	2.033409
97	0.65927196	2.03742810	1.34321922		97.00000000	0.35402062	0.72129156	2.054783
98	0.66895908	0.15638205	0.10461319		98.00000000	0.35040816	0.05479755	2.076204
99	0.67911291	-2.15216800	-1.46156507		99.00000000	0.34686869	-0.74651969	2.097720
100	0.68878514	-4.76981020	-3.28537439		100.00000000	0.34340000	-1.63795282	2.119092
101	0.69902897	-7.92372420	-5.53891277		101.00000000	0.34000000	-2.69406623	2.140447
05:03 04/04/2018
Test Lot:	JK-PERC
Recipe:	Recipe_YJX-LID
Cell Name:	3-16-8h
Test Order:	4
Test Condition:	Light
1	-0.29990345	9.08811280	-2.72555638		1.00000000	34.34000000	312.08579355	0.000000
2	-0.29004991	9.08855340	-2.63613410		2.00000000	17.17000000	156.05046188	0.061795
3	-0.27992395	9.08894920	-2.54421456		3.00000000	11.44666667	104.03817184	0.083216
4	-0.27012548	9.09416290	-2.45656512		4.00000000	8.58500000	78.07338850	0.104702
5	-0.25994295	9.09874530	-2.36515469		5.00000000	6.86800000	62.49018272	0.126083
6	-0.24982518	9.08945470	-2.27077466		6.00000000	5.72333333	52.02197907	0.147436
7	-0.24000438	9.09737490	-2.18340982		7.00000000	4.90571429	44.62912201	0.168814
8	-0.22987172	9.08708860	-2.08886469		8.00000000	4.29250000	39.00632782	0.190282
9	-0.22003305	9.09466840	-2.00112763		9.00000000	3.81555556	34.70121254	0.211653
10	-0.20985946	9.09622860	-1.90892962		10.00000000	3.43400000	31.23644901	0.233073
11	-0.20004907	9.08733560	-1.81791304		11.00000000	3.12181818	28.36900950	0.254468
12	-0.18989410	9.08066460	-1.72436463		12.00000000	2.86166667	25.98583520	0.275954
13	-0.18013507	9.09832670	-1.63892772		13.00000000	2.64153846	24.03357991	0.297352
14	-0.16997412	9.09249210	-1.54548834		14.00000000	2.45285714	22.30258419	0.318748
15	-0.16014960	9.08750250	-1.45535989		15.00000000	2.28933333	20.80432239	0.340101
16	-0.15002662	9.09581280	-1.36461405		16.00000000	2.14625000	19.52188822	0.361571
17	-0.13986568	9.09609510	-1.27223153		17.00000000	2.02000000	18.37411210	0.382960
18	-0.13002999	9.08054450	-1.18074311		18.00000000	1.90777778	17.32366101	0.404342
19	-0.11986831	9.09509850	-1.09021409		19.00000000	1.80736842	16.43819382	0.425831
20	-0.11008696	9.09034920	-1.00072891		20.00000000	1.71700000	15.60812958	0.447208
21	-0.09989326	9.07977200	-0.90700806		21.00000000	1.63523810	14.84758907	0.468562
22	-0.09008586	9.09315780	-0.81916498		22.00000000	1.56090909	14.19359268	0.489929
23	-0.07994948	9.09603310	-0.72722314		23.00000000	1.49304348	13.58077290	0.511406
24	-0.07008924	9.09143540	-0.63721176		24.00000000	1.43083333	13.00832882	0.532776
25	-0.05997668	9.09103490	-0.54525005		25.00000000	1.37360000	12.48744554	0.554142
26	-0.04978150	9.09096810	-0.45256201		26.00000000	1.32076923	12.00707094	0.575519
27	-0.03997186	9.08574490	-0.36317414		27.00000000	1.27185185	11.55572148	0.596993
28	-0.02984814	9.09228990	-0.27138791		28.00000000	1.22642857	11.15104411	0.618381
29	-0.02001691	9.09538270	-0.18206149		29.00000000	1.18413793	10.77018765	0.639733
30	-0.00989542	9.09085660	-0.08995786		30.00000000	1.14466667	10.40600052	0.661107
31	-0.00062613	9.08998200	-0.00569153		31.00000000	1.10774194	10.06935425	0.682702
32	0.00952046	9.08561800	0.08649924		32.00000000	1.07312500	9.75000382	0.704074
33	0.01932907	9.09639070	0.17582478		33.00000000	1.04060606	9.46575929	0.725416
34	0.02949642	9.07682800	0.26773391		34.00000000	1.01000000	9.16759628	0.746793
35	0.03932141	9.09287450	0.35754463		35.00000000	0.98114286	8.92140887	0.768271
36	0.04947387	9.09483150	0.44995652		36.00000000	0.95388889	8.67545871	0.789668
37	0.05923932	9.08843040	0.53839241		37.00000000	0.92810811	8.43504594	0.811017
38	0.06939922	9.08499910	0.63049188		38.00000000	0.90368421	8.20997024	0.832392
39	0.07955020	9.10213280	0.72407648		39.00000000	0.88051282	8.01454462	0.853871
40	0.08935732	9.08140560	0.81149010		40.00000000	0.85850000	7.79638671	0.875239
41	0.09949267	9.09579280	0.90496470		41.00000000	0.83756098	7.61828109	0.896586
42	0.10933030	9.08598330	0.99337328		42.00000000	0.81761905	7.42887301	0.917960
43	0.11948352	9.08680150	1.08572303		43.00000000	0.79860465	7.25676194	0.939433
44	0.12928990	9.09400560	1.17576307		44.00000000	0.78045455	7.09745801	0.960798
45	0.13945873	9.08839700	1.26745630		45.00000000	0.76311111	6.93545673	0.982189
46	0.14925320	9.09232710	1.35705892		46.00000000	0.74652174	6.78761984	1.003541
47	0.15941906	9.08402440	1.44816663		47.00000000	0.73063830	6.63713613	1.025024
48	0.16954473	9.09202000	1.54150408		48.00000000	0.71541667	6.50458264	1.046417
49	0.17938535	9.08890720	1.63041680		49.00000000	0.70081633	6.36965456	1.067797
50	0.18951027	9.08341690	1.72140079		50.00000000	0.68680000	6.23849073	1.089330
51	0.19929060	9.08043770	1.80964588		51.00000000	0.67333333	6.11416138	1.110704
52	0.20945424	9.09740540	1.90549013		52.00000000	0.66038462	6.00778657	1.132053
53	0.21928294	9.08979320	1.99323658		53.00000000	0.64792453	5.88949997	1.153425
54	0.22941159	9.08503250	2.08421175		54.00000000	0.63592593	5.77740770	1.174905
55	0.23926412	9.09273910	2.17556622		55.00000000	0.62436364	5.67717565	1.196279
56	0.24940541	9.08388230	2.26556939		56.00000000	0.61321429	5.57036640	1.217644
57	0.25957945	9.09584330	2.36109400		57.00000000	0.60245614	5.47984665	1.239022
58	0.26940444	9.08742900	2.44819372		58.00000000	0.59206897	5.38038469	1.260498
59	0.27954724	9.08542920	2.53980666		59.00000000	0.58203390	5.28802778	1.281880
60	0.28933799	9.08848190	2.62964309		60.00000000	0.57233333	5.20164114	1.303228
61	0.29948300	9.09643750	2.72422839		61.00000000	0.56295082	5.12084695	1.324601
62	0.30934075	9.07032780	2.80582200		62.00000000	0.55387097	5.02379124	1.346090
63	0.31947386	9.10771370	2.90967645		63.00000000	0.54507937	4.96442680	1.367465
64	0.32926238	9.08050630	2.98986912		64.00000000	0.53656250	4.87225916	1.388813
65	0.33944163	9.08785920	3.08479774		65.00000000	0.52830769	4.80118592	1.410191
66	0.34927332	9.08410450	3.17283534		66.00000000	0.52030303	4.72648710	1.431665
67	0.35939452	9.07837680	3.26271887		67.00000000	0.51253731	4.65300686	1.453050
68	0.36957675	9.09976010	3.36305976		68.00000000	0.50500000	4.59537885	1.474407
69	0.37940547	9.07839680	3.44439340		69.00000000	0.49768116	4.51814705	1.495785
70	0.38951623	9.08923910	3.54040615		70.00000000	0.49057143	4.45892101	1.517258
71	0.39929360	9.08515260	3.62764329		71.00000000	0.48366197	4.39414282	1.538624
72	0.40947211	9.08102510	3.71842651		72.00000000	0.47694444	4.33114447	1.559989
73	0.41930902	9.08597660	3.80983194		73.00000000	0.47041096	4.27414296	1.581358
74	0.42943543	9.06819340	3.89420353		74.00000000	0.46405405	4.20813191	1.602831
75	0.43924701	9.09308620	3.99411093		75.00000000	0.45786667	4.16342107	1.624205
76	0.44944561	9.07075500	4.07681101		76.00000000	0.45184211	4.09854904	1.645594
77	0.45957130	9.08514210	4.17527057		77.00000000	0.44597403	4.05173740	1.666949
78	0.46942976	9.06711010	4.25637132		78.00000000	0.44025641	3.99185334	1.688478
79	0.47956362	9.06469920	4.34709996		79.00000000	0.43468354	3.94027558	1.709859
80	0.48937595	9.05335040	4.43049195		80.00000000	0.42925000	3.88615066	1.731261
81	0.49947333	9.04226110	4.51636826		81.00000000	0.42395062	3.83347217	1.752741
82	0.50934523	9.01968770	4.59413491		82.00000000	0.41878049	3.77726921	1.774109
83	0.51947683	9.00910380	4.68002068		83.00000000	0.41373494	3.72738102	1.795464
84	0.52926910	8.95959380	4.74203615		84.00000000	0.40880952	3.66276727	1.816857
85	0.53937465	8.91912940	4.81075230		85.00000000	0.40400000	3.60332828	1.838332
86	0.54956210	8.85548400	4.86663838		86.00000000	0.39930233	3.53601536	1.859711
87	0.55939525	8.75222970	4.89595572		87.00000000	0.39471264	3.45461572	1.881073
88	0.56950158	8.63089850	4.91531033		88.00000000	0.39022727	3.36801198	1.902449
89	0.57929236	8.44858650	4.89420161		89.00000000	0.38584270	3.25982540	1.923932
90	0.58942693	8.19157510	4.82833496		90.00000000	0.38155556	3.12554099	1.945317
91	0.59920728	7.83976080	4.69764174		91.00000000	0.37736264	2.95843281	1.966666
92	0.60931510	7.38229510	4.49814388		92.00000000	0.37326087	2.75552189	1.988139
93	0.61913484	6.75386000	4.18155003		93.00000000	0.36924731	2.49384465	2.009644
94	0.62927991	5.95388030	3.74665726		94.00000000	0.36531915	2.17506648	2.031028
95	0.63938767	4.91294290	3.14127511		95.00000000	0.36147368	1.77589957	2.052392
96	0.64918661	3.65023730	2.36968518		96.00000000	0.35770833	1.30572030	2.073763
97	0.65926617	2.03367260	1.34073155		97.00000000	0.35402062	0.71996203	2.095241
98	0.66899514	0.15135944	0.10125873		98.00000000	0.35040816	0.05303758	2.116631
99	0.67911488	-2.15607570	-1.46422309		99.00000000	0.34686869	-0.74787515	2.137983
100	0.68883789	-4.78277540	-3.29455691		100.00000000	0.34340000	-1.64240507	2.159356
101	0.69906032	-7.95097490	-5.55821106		101.00000000	0.34000000	-2.70333147	2.180836
