# Supplementary material for: Study on the Electrical Injection Regeneration of Industrialized B-Doped Czochralski Silicon PERC Solar Cells
Source: Hindawi journal article supplement (doi:10.1155/2019/5357370), 2019-06-20
Supplement: f1 [file 5357370.f1.zip › section3.3/IVRawData_3-16-9h.csv]

06:05 04/04/2018
Test Lot:	JK-PERC
Recipe:	Recipe_YJX-LID
Cell Name:	3-16-9h
Test Order:	2
Test Condition:	Light
1	-0.29991472	9.09932040	-2.72902013		1.00000000	34.34000000	312.47066254	0.000000
2	-0.29011726	9.09145160	-2.63758703		2.00000000	17.17000000	156.10022397	0.061802
3	-0.27996778	9.11036680	-2.55060917		3.00000000	11.44666667	104.28333197	0.083230
4	-0.27016068	9.09397510	-2.45683450		4.00000000	8.58500000	78.07177623	0.104764
5	-0.25998291	9.09738160	-2.36516374		5.00000000	6.86800000	62.48081683	0.126150
6	-0.24983791	9.09973810	-2.27345955		6.00000000	5.72333333	52.08083439	0.147493
7	-0.24000920	9.09861660	-2.18375169		7.00000000	4.90571429	44.63521343	0.168873
8	-0.22984782	9.10879140	-2.09363585		8.00000000	4.29250000	39.09948708	0.190336
9	-0.22005707	9.08847140	-1.99998239		9.00000000	3.81555556	34.67756754	0.211743
10	-0.20988080	9.10085300	-1.91009431		10.00000000	3.43400000	31.25232920	0.233133
11	-0.20003498	9.09606270	-1.81953072		11.00000000	3.12181818	28.39625392	0.254524
12	-0.18992941	9.08900360	-1.72626909		12.00000000	2.86166667	26.00969864	0.276008
13	-0.18014015	9.09758660	-1.63884061		13.00000000	2.64153846	24.03162491	0.297384
14	-0.17001227	9.09317210	-1.54595083		14.00000000	2.45285714	22.30425214	0.318746
15	-0.16021185	9.09815880	-1.45763285		15.00000000	2.28933333	20.82871821	0.340113
16	-0.15003483	9.09898380	-1.36516449		16.00000000	2.14625000	19.52869398	0.361592
17	-0.13984218	9.09007360	-1.27117571		17.00000000	2.02000000	18.36194867	0.382975
18	-0.13004845	9.10148720	-1.18363430		18.00000000	1.90777778	17.36361502	0.404365
19	-0.11990196	9.10057540	-1.09117683		19.00000000	1.80736842	16.44809259	0.425711
20	-0.11008590	9.09463120	-1.00119066		20.00000000	1.71700000	15.61548177	0.447186
21	-0.09997290	9.09047890	-0.90880150		21.00000000	1.63523810	14.86509740	0.468583
22	-0.09013899	9.10264020	-0.82050277		22.00000000	1.56090909	14.20839384	0.489961
23	-0.08000886	9.09601970	-0.72776214		23.00000000	1.49304348	13.58075289	0.511439
24	-0.07014518	9.10152530	-0.63842808		24.00000000	1.43083333	13.02276578	0.532820
25	-0.06002919	9.10519700	-0.54657760		25.00000000	1.37360000	12.50689860	0.554153
26	-0.04985590	9.09501170	-0.45343995		26.00000000	1.32076923	12.01241161	0.575530
27	-0.04003687	9.09219930	-0.36402318		27.00000000	1.27185185	11.56393052	0.597019
28	-0.02991418	9.09135340	-0.27196040		28.00000000	1.22642857	11.14989556	0.618394
29	-0.02008623	9.10864830	-0.18295836		29.00000000	1.18413793	10.78589595	0.639758
30	-0.00995833	9.09377000	-0.09055876		30.00000000	1.14466667	10.40933539	0.661133
31	-0.00069080	9.09734820	-0.00628445		31.00000000	1.10774194	10.07751410	0.682719
32	0.00945475	9.09891320	0.08602795		32.00000000	1.07312500	9.76427123	0.704112
33	0.01926680	9.08876800	0.17511147		33.00000000	1.04060606	9.45782706	0.725472
34	0.02942641	9.10137840	0.26782087		34.00000000	1.01000000	9.19239218	0.746845
35	0.03925632	9.08451940	0.35662476		35.00000000	0.98114286	8.91321132	0.768335
36	0.04939434	9.10075760	0.44952594		36.00000000	0.95388889	8.68111156	0.789710
37	0.05924956	9.08633520	0.53836134		37.00000000	0.92810811	8.43310137	0.811056
38	0.06938163	9.10337450	0.63160698		38.00000000	0.90368421	8.22657580	0.832436
39	0.07951295	9.08609960	0.72246262		39.00000000	0.88051282	8.00042719	0.853917
40	0.08936817	9.09696390	0.81297903		40.00000000	0.85850000	7.80974351	0.875306
41	0.09952927	9.10591410	0.90630495		41.00000000	0.83756098	7.62675830	0.896655
42	0.10930038	9.09143350	0.99369714		42.00000000	0.81761905	7.43332920	0.918024
43	0.11946371	9.10475440	1.08768774		43.00000000	0.79860465	7.27109921	0.939513
44	0.12929586	9.09566210	1.17603145		44.00000000	0.78045455	7.09875083	0.960883
45	0.13942420	9.10066410	1.26885281		45.00000000	0.76311111	6.94481789	0.982243
46	0.14924444	9.09786700	1.35780607		46.00000000	0.74652174	6.79175550	1.003630
47	0.15937948	9.09698100	1.44987210		47.00000000	0.73063830	6.64660271	1.025119
48	0.16953166	9.10299590	1.54324601		48.00000000	0.71541667	6.51243498	1.046495
49	0.17939208	9.09808730	1.63212480		49.00000000	0.70081633	6.37608812	1.067887
50	0.18951522	9.09762860	1.72413909		50.00000000	0.68680000	6.24825132	1.089237
51	0.19933397	9.09135820	1.81221652		51.00000000	0.67333333	6.12151452	1.110714
52	0.20945488	9.09576610	1.90515260		52.00000000	0.66038462	6.00670400	1.132110
53	0.21927659	9.08775710	1.99273239		53.00000000	0.64792453	5.88818073	1.153502
54	0.22937667	9.10353950	2.08813958		54.00000000	0.63592593	5.78917679	1.174989
55	0.23922890	9.09401040	2.17555010		55.00000000	0.62436364	5.67796940	1.196360
56	0.24941605	9.08871650	2.26687177		56.00000000	0.61321429	5.57333080	1.217714
57	0.25949529	9.10214140	2.36196282		57.00000000	0.60245614	5.48364098	1.239100
58	0.26932073	9.08792020	2.44756530		58.00000000	0.59206897	5.38067551	1.260585
59	0.27950117	9.09014510	2.54070619		59.00000000	0.58203390	5.29077259	1.281960
60	0.28929016	9.09315590	2.63056053		60.00000000	0.57233333	5.20431623	1.303322
61	0.29946092	9.08675380	2.72112765		61.00000000	0.56295082	5.11539550	1.324707
62	0.30927968	9.09288500	2.81224456		62.00000000	0.55387097	5.03628501	1.346185
63	0.31942961	9.08673860	2.90257337		63.00000000	0.54507937	4.95299371	1.367587
64	0.32926100	9.10916520	2.99929284		64.00000000	0.53656250	4.88763645	1.388932
65	0.33937892	9.10363290	3.08958110		65.00000000	0.52830769	4.80951929	1.410308
66	0.34920585	9.09764670	3.17695145		66.00000000	0.52030303	4.73353315	1.431794
67	0.35934165	9.09149840	3.26695404		67.00000000	0.51253731	4.65973217	1.453173
68	0.36953476	9.08646870	3.35776603		68.00000000	0.50500000	4.58866669	1.474532
69	0.37934607	9.08394150	3.44595751		69.00000000	0.49768116	4.52090654	1.495905
70	0.38952577	9.09783550	3.54384138		70.00000000	0.49057143	4.46313816	1.517386
71	0.39930880	9.09547900	3.63190480		71.00000000	0.48366197	4.39913731	1.538768
72	0.40948105	9.08583930	3.72047902		72.00000000	0.47694444	4.33344058	1.560114
73	0.41928640	9.08810710	3.81051971		73.00000000	0.47041096	4.27514518	1.581485
74	0.42946014	9.07923890	3.89917121		74.00000000	0.46405405	4.21325762	1.602956
75	0.43925062	9.10774040	4.00058062		75.00000000	0.45786667	4.17013074	1.624335
76	0.44941765	9.07178880	4.07702200		76.00000000	0.45184211	4.09901615	1.645695
77	0.45958322	9.07552530	4.17095914		77.00000000	0.44597403	4.04744856	1.667061
78	0.46941984	9.06770320	4.25655979		78.00000000	0.44025641	3.99211446	1.688542
79	0.47955415	9.06725790	4.34824116		79.00000000	0.43468354	3.94138780	1.709921
80	0.48938778	9.05764290	4.43269975		80.00000000	0.42925000	3.88799321	1.731313
81	0.49950123	9.04525470	4.51811585		81.00000000	0.42395062	3.83474131	1.752673
82	0.50932521	9.03451540	4.60150645		82.00000000	0.41878049	3.78347877	1.774138
83	0.51945204	9.01074030	4.68064743		83.00000000	0.41373494	3.72805810	1.795525
84	0.52920455	8.97228240	4.74817267		84.00000000	0.40880952	3.66795450	1.816903
85	0.53936565	8.92123220	4.81180620		85.00000000	0.40400000	3.60417781	1.838389
86	0.54953867	8.85560130	4.86649536		86.00000000	0.39930233	3.53606219	1.859765
87	0.55931872	8.76301770	4.90131984		87.00000000	0.39471264	3.45887388	1.881119
88	0.56948578	8.64235310	4.92169720		88.00000000	0.39022727	3.37248188	1.902509
89	0.57927322	8.44084360	4.88955465		89.00000000	0.38584270	3.25683786	1.923993
90	0.58943433	8.19846440	4.83245637		90.00000000	0.38155556	3.12816964	1.945357
91	0.59922481	7.84929370	4.70349153		91.00000000	0.37736264	2.96203017	1.966721
92	0.60934424	7.38811870	4.50190757		92.00000000	0.37326087	2.75769561	1.988200
93	0.61909825	6.76495840	4.18817391		93.00000000	0.36924731	2.49794270	2.009718
94	0.62921989	5.96310620	3.75210503		94.00000000	0.36531915	2.17843688	2.031111
95	0.63936758	4.90309140	3.13487768		95.00000000	0.36147368	1.77233851	2.052454
96	0.64911193	3.64393000	2.36531844		96.00000000	0.35770833	1.30346413	2.073830
97	0.65920752	2.02520300	1.33502905		97.00000000	0.35402062	0.71696362	2.095317
98	0.66896898	0.15765482	0.10546618		98.00000000	0.35040816	0.05524354	2.116697
99	0.67908317	-2.15926530	-1.46632072		99.00000000	0.34686869	-0.74898152	2.138062
100	0.68879104	-4.74135160	-3.26580050		100.00000000	0.34340000	-1.62818014	2.159428
101	0.69902802	-7.87073180	-5.50186207		101.00000000	0.34000000	-2.67604881	2.180910
06:05 04/04/2018
Test Lot:	JK-PERC
Recipe:	Recipe_YJX-LID
Cell Name:	3-16-9h
Test Order:	3
Test Condition:	Light
1	-0.29989687	9.09918400	-2.72881680		1.00000000	34.34000000	312.46597856	0.000000
2	-0.29004806	9.09091570	-2.63680246		2.00000000	17.17000000	156.09102257	0.021576
3	-0.27990749	9.10371300	-2.54819746		3.00000000	11.44666667	104.20716814	0.043041
4	-0.27013984	9.09965800	-2.45818016		4.00000000	8.58500000	78.12056393	0.064396
5	-0.25998515	9.09531880	-2.36464782		5.00000000	6.86800000	62.46664952	0.085778
6	-0.24985354	9.09383300	-2.27212637		6.00000000	5.72333333	52.04703754	0.107306
7	-0.24001515	9.09852310	-2.18378339		7.00000000	4.90571429	44.63475475	0.128709
8	-0.22984782	9.09562590	-2.09060978		8.00000000	4.29250000	39.04297418	0.150132
9	-0.21999009	9.08704950	-1.99906084		9.00000000	3.81555556	34.67214220	0.171523
10	-0.20987931	9.09994130	-1.90988940		10.00000000	3.43400000	31.24919842	0.193011
11	-0.20005657	9.09079740	-1.81867375		11.00000000	3.12181818	28.37981661	0.214401
12	-0.18990783	9.09875970	-1.72792571		12.00000000	2.86166667	26.03761734	0.235750
13	-0.18013717	9.09821890	-1.63892740		13.00000000	2.64153846	24.03329516	0.257123
14	-0.16999812	9.08763500	-1.54488087		14.00000000	2.45285714	22.29067042	0.278611
15	-0.16018282	9.09776690	-1.45730596		15.00000000	2.28933333	20.82782102	0.300003
16	-0.15005939	9.09217070	-1.36436559		16.00000000	2.14625000	19.51407136	0.321357
17	-0.13989130	9.10954570	-1.27434619		17.00000000	2.02000000	18.40128231	0.342732
18	-0.13003804	9.08735940	-1.18170241		18.00000000	1.90777778	17.33666232	0.364218
19	-0.11990791	9.10087780	-1.09126724		19.00000000	1.80736842	16.44863914	0.385608
20	-0.11007549	9.09950260	-1.00163221		20.00000000	1.71700000	15.62384596	0.406966
21	-0.09995727	9.09983440	-0.90959456		21.00000000	1.63523810	14.88039587	0.428340
22	-0.09015015	9.09223460	-0.81966629		22.00000000	1.56090909	14.19215164	0.449820
23	-0.07996420	9.09532830	-0.72730063		23.00000000	1.49304348	13.57972060	0.471194
24	-0.07019206	9.09711740	-0.63854542		24.00000000	1.43083333	13.01645881	0.492536
25	-0.06004184	9.09464930	-0.54605949		25.00000000	1.37360000	12.49241028	0.513907
26	-0.04986408	9.09807210	-0.45366700		26.00000000	1.32076923	12.01645369	0.535390
27	-0.04005845	9.09279160	-0.36424313		27.00000000	1.27185185	11.56468383	0.556764
28	-0.02992088	9.10074420	-0.27230228		28.00000000	1.22642857	11.16141271	0.578123
29	-0.02006092	9.09955410	-0.18254542		29.00000000	1.18413793	10.77512717	0.599500
30	-0.00993005	9.09194090	-0.09028341		30.00000000	1.14466667	10.40724168	0.620964
31	-0.00066029	9.08322720	-0.00599752		31.00000000	1.10774194	10.06187168	0.642458
32	0.00945624	9.10222820	0.08607284		32.00000000	1.07312500	9.76782864	0.663833
33	0.01931294	9.10454560	0.17583556		33.00000000	1.04060606	9.47424533	0.685199
34	0.02945022	9.08841420	0.26765582		34.00000000	1.01000000	9.17929834	0.706682
35	0.03923474	9.08597280	0.35648574		35.00000000	0.98114286	8.91463731	0.728060
36	0.04945090	9.09047700	0.44953231		36.00000000	0.95388889	8.67130501	0.749449
37	0.05926519	9.08493800	0.53842053		37.00000000	0.92810811	8.43180462	0.770855
38	0.06935558	9.10405350	0.63141688		38.00000000	0.90368421	8.22718940	0.792328
39	0.07951370	9.08041670	0.72201752		39.00000000	0.88051282	7.99542332	0.813706
40	0.08934510	9.09815880	0.81287589		40.00000000	0.85850000	7.81076933	0.835121
41	0.09954117	9.09990310	0.90581502		41.00000000	0.83756098	7.62172372	0.856486
42	0.10933015	9.08754830	0.99354302		42.00000000	0.81761905	7.43015259	0.877972
43	0.11951358	9.09679410	1.08719043		43.00000000	0.79860465	7.26474208	0.899359
44	0.12931223	9.10271550	1.17709244		44.00000000	0.78045455	7.10425569	0.920736
45	0.13943388	9.08754160	1.26711118		45.00000000	0.76311111	6.93480397	0.942102
46	0.14925560	9.09123990	1.35691847		46.00000000	0.74652174	6.78680822	0.963581
47	0.15937354	9.09117980	1.44889351		47.00000000	0.73063830	6.64236413	0.984976
48	0.16955249	9.09259130	1.54167150		48.00000000	0.71541667	6.50499136	1.006355
49	0.17936380	9.08904360	1.63024540		49.00000000	0.70081633	6.36975015	1.027694
50	0.18950406	9.10472300	1.72538197		50.00000000	0.68680000	6.25312376	1.049171
51	0.19927442	9.08260350	1.80993054		51.00000000	0.67333333	6.11561969	1.070541
52	0.20944445	9.09254650	1.90438340		52.00000000	0.66038462	6.00457782	1.091916
53	0.21924460	9.09431550	1.99387956		53.00000000	0.64792453	5.89243008	1.113399
54	0.22936550	9.08259490	2.08323392		54.00000000	0.63592593	5.77585757	1.134777
55	0.23921402	9.09677890	2.17607705		55.00000000	0.62436364	5.67969795	1.156118
56	0.24935576	9.08101080	2.26440235		56.00000000	0.61321429	5.56860555	1.177507
57	0.25952134	9.09301190	2.35983063		57.00000000	0.60245614	5.47814085	1.198990
58	0.26936314	9.08868120	2.44815571		58.00000000	0.59206897	5.38112608	1.220385
59	0.27947214	9.09443380	2.54164088		59.00000000	0.58203390	5.29326876	1.241735
60	0.28934672	9.08740140	2.62940979		60.00000000	0.57233333	5.20102273	1.263101
61	0.29946911	9.09690570	2.72424225		61.00000000	0.56295082	5.12111052	1.284569
62	0.30927670	9.09179880	2.81188153		62.00000000	0.55387097	5.03568340	1.305946
63	0.31945193	9.09184550	2.90440759		63.00000000	0.54507937	4.95577737	1.327283
64	0.32927364	9.09233280	2.99386552		64.00000000	0.53656250	4.87860482	1.348657
65	0.33938339	9.09719280	3.08743613		65.00000000	0.52830769	4.80611693	1.370137
66	0.34919918	9.09294030	3.17524730		66.00000000	0.52030303	4.73108439	1.391515
67	0.35934836	9.08428570	3.26442317		67.00000000	0.51253731	4.65603539	1.412872
68	0.36950946	9.08890820	3.35843756		68.00000000	0.50500000	4.58989864	1.434257
69	0.37936243	9.09991650	3.45216644		69.00000000	0.49768116	4.52885699	1.455742
70	0.38949376	9.08706090	3.53935352		70.00000000	0.49057143	4.45785245	1.477128
71	0.39932218	9.08771040	3.62892433		71.00000000	0.48366197	4.39537993	1.498476
72	0.40948105	9.08871170	3.72165521		72.00000000	0.47694444	4.33481055	1.519838
73	0.41923654	9.08678530	3.80951243		73.00000000	0.47041096	4.27452339	1.541311
74	0.42944899	9.08425240	3.90122302		74.00000000	0.46405405	4.21558415	1.562688
75	0.43926847	9.09300230	3.99426921		75.00000000	0.45786667	4.16338265	1.584059
76	0.44937375	9.07343290	4.07736257		76.00000000	0.45184211	4.09975902	1.605410
77	0.45951030	9.07873820	4.17177371		77.00000000	0.44597403	4.04888143	1.626885
78	0.46938857	9.06623270	4.25558600		78.00000000	0.44025641	3.99146706	1.648281
79	0.47951469	9.06234930	4.34552962		79.00000000	0.43468354	3.93925411	1.669667
80	0.48934311	9.06285380	4.43484506		80.00000000	0.42925000	3.89022999	1.691009
81	0.49945807	9.04244610	4.51632268		81.00000000	0.42395062	3.83355061	1.712479
82	0.50933188	9.03250310	4.60054179		82.00000000	0.41878049	3.78263605	1.733858
83	0.51941407	9.01007460	4.67995952		83.00000000	0.41373494	3.72778267	1.755230
84	0.52923805	8.98723220	4.75638524		84.00000000	0.40880952	3.67406612	1.776702
85	0.53937531	8.92020610	4.81133893		85.00000000	0.40400000	3.60376326	1.798086
86	0.54951036	8.87055970	4.87446445		86.00000000	0.39930233	3.54203512	1.819434
87	0.55932915	8.77222160	4.90655925		87.00000000	0.39471264	3.46250678	1.840812
88	0.56943589	8.65421390	4.92801999		88.00000000	0.39022727	3.37711029	1.862295
89	0.57927322	8.45914750	4.90015761		89.00000000	0.38584270	3.26390028	1.883688
90	0.58941126	8.20376970	4.83539424		90.00000000	0.38155556	3.13019391	1.905030
91	0.59917271	7.88474940	4.72432667		91.00000000	0.37736264	2.97540983	1.926401
92	0.60933977	7.41885230	4.52060175		92.00000000	0.37326087	2.76916726	1.947883
93	0.61911160	6.81836080	4.22132626		93.00000000	0.36924731	2.51766140	1.969263
94	0.62919235	5.99970820	3.77497050		94.00000000	0.36531915	2.19180829	1.990723
95	0.63935345	4.95546820	3.16829569		95.00000000	0.36147368	1.79127135	2.012135
96	0.64916921	3.68854930	2.39449264		96.00000000	0.35770833	1.31942482	2.033633
97	0.65928566	2.05819080	1.35693568		97.00000000	0.35402062	0.72864198	2.055018
98	0.66898531	0.13259354	0.08870313		98.00000000	0.35040816	0.04646186	2.076379
99	0.67904741	-2.22269080	-1.50931243		99.00000000	0.34686869	-0.77098184	2.097751
100	0.68880886	-4.91830400	-3.38777137		100.00000000	0.34340000	-1.68894559	2.119237
101	0.69901538	-8.16399860	-5.70676058		101.00000000	0.34000000	-2.77575952	2.140697
06:05 04/04/2018
Test Lot:	JK-PERC
Recipe:	Recipe_YJX-LID
Cell Name:	3-16-9h
Test Order:	4
Test Condition:	Light
1	-0.29993275	9.09991260	-2.72936181		1.00000000	34.34000000	312.49099868	0.000000
2	-0.29017237	9.08304020	-2.63564730		2.00000000	17.17000000	155.95580023	0.061814
3	-0.27996317	9.09950730	-2.54752691		3.00000000	11.44666667	104.15902689	0.083218
4	-0.27017149	9.09624960	-2.45754731		4.00000000	8.58500000	78.09130282	0.104602
5	-0.26001066	9.10227780	-2.36668926		5.00000000	6.86800000	62.51444393	0.126097
6	-0.24982454	9.09502120	-2.27215949		6.00000000	5.72333333	52.05383800	0.147553
7	-0.24000534	9.09833050	-2.18364791		7.00000000	4.90571429	44.63380991	0.168966
8	-0.22991596	9.09386630	-2.09082500		8.00000000	4.29250000	39.03542109	0.190330
9	-0.22010942	9.10439210	-2.00396246		9.00000000	3.81555556	34.73831386	0.211807
10	-0.20993966	9.09158990	-1.90868529		10.00000000	3.43400000	31.22051972	0.233184
11	-0.20006539	9.09680560	-1.81995596		11.00000000	3.12181818	28.39857312	0.254574
12	-0.18997973	9.09487920	-1.72784269		12.00000000	2.86166667	26.02651264	0.275996
13	-0.18017319	9.08216290	-1.63636226		13.00000000	2.64153846	23.99088261	0.297462
14	-0.17003544	9.09547040	-1.54655231		14.00000000	2.45285714	22.30988954	0.318841
15	-0.16017902	9.09532830	-1.45688077		15.00000000	2.28933333	20.82223825	0.340244
16	-0.15006061	9.09527020	-1.36484179		16.00000000	2.14625000	19.52072367	0.361602
17	-0.13993180	9.09146500	-1.27218506		17.00000000	2.02000000	18.36475930	0.383090
18	-0.13010143	9.09878160	-1.18376450		18.00000000	1.90777778	17.35845334	0.404469
19	-0.11996293	9.08751300	-1.09016469		19.00000000	1.80736842	16.42448402	0.425837
20	-0.11012661	9.09588430	-1.00169890		20.00000000	1.71700000	15.61763334	0.447202
21	-0.09995835	9.09979630	-0.90960058		21.00000000	1.63523810	14.88033357	0.468685
22	-0.09013394	9.09753610	-0.81999673		22.00000000	1.56090909	14.20042680	0.490066
23	-0.07994632	9.09944060	-0.72746676		23.00000000	1.49304348	13.58586044	0.511444
24	-0.07015093	9.09687710	-0.63815443		24.00000000	1.43083333	13.01611498	0.532789
25	-0.06001169	9.08526520	-0.54522214		25.00000000	1.37360000	12.47952028	0.554256
26	-0.04985980	9.09856800	-0.45365277		26.00000000	1.32076923	12.01710866	0.575632
27	-0.04003613	9.09083940	-0.36396206		27.00000000	1.27185185	11.56220093	0.597009
28	-0.02992890	9.10314180	-0.27244699		28.00000000	1.22642857	11.16435319	0.618489
29	-0.02009481	9.09293840	-0.18272087		29.00000000	1.18413793	10.76729326	0.639867
30	-0.00992208	9.09655480	-0.09025673		30.00000000	1.14466667	10.41252306	0.661207
31	-0.00064396	9.08437250	-0.00585000		31.00000000	1.10774194	10.06314038	0.682713
32	0.00946902	9.09998990	0.08616799		32.00000000	1.07312500	9.76542666	0.704193
33	0.01929315	9.09419820	0.17545575		33.00000000	1.04060606	9.46347776	0.725609
34	0.02944550	9.09082410	0.26768385		34.00000000	1.01000000	9.18173234	0.746966
35	0.03929196	9.10075380	0.35758645		35.00000000	0.98114286	8.92913959	0.768340
36	0.04940635	9.09088420	0.44914741		36.00000000	0.95388889	8.67169343	0.789822
37	0.05919774	9.09376810	0.53833047		37.00000000	0.92810811	8.43999991	0.811200
38	0.06938134	9.09685230	0.63115181		38.00000000	0.90368421	8.22068179	0.832553
39	0.07945703	9.08970070	0.72224062		39.00000000	0.88051282	8.00359800	0.853933
40	0.08934666	9.09547330	0.81265011		40.00000000	0.85850000	7.80846383	0.875412
41	0.09946849	9.09384440	0.90455093		41.00000000	0.83756098	7.61664919	0.896785
42	0.10926508	9.08816050	0.99301858		42.00000000	0.81761905	7.43065313	0.918152
43	0.11945539	9.09468750	1.08640944		43.00000000	0.79860465	7.26305974	0.939543
44	0.12926984	9.07829760	1.17355008		44.00000000	0.78045455	7.08519863	0.961021
45	0.13942294	9.09497930	1.26804875		45.00000000	0.76311111	6.94047976	0.982406
46	0.14920166	9.10072230	1.35784287		46.00000000	0.74652174	6.79388704	1.003755
47	0.15938081	9.08508010	1.44798743		47.00000000	0.73063830	6.63790746	1.025127
48	0.16951753	9.09186740	1.54123090		48.00000000	0.71541667	6.50447347	1.046607
49	0.17936696	9.09301850	1.63098709		49.00000000	0.70081633	6.37253582	1.067984
50	0.18950665	9.09685520	1.72391455		50.00000000	0.68680000	6.24772015	1.089364
51	0.19925711	9.09370610	1.81198560		51.00000000	0.67333333	6.12309544	1.110722
52	0.20942062	9.09436700	1.90454798		52.00000000	0.66038462	6.00578005	1.132200
53	0.21923657	9.09292220	1.99350107		53.00000000	0.64792453	5.89152733	1.153595
54	0.22937031	9.09472940	2.08606090		54.00000000	0.63592593	5.78357421	1.174978
55	0.23922570	9.09994320	2.17694028		55.00000000	0.62436364	5.68167363	1.196320
56	0.24938251	9.09265140	2.26754823		56.00000000	0.61321429	5.57574373	1.217788
57	0.25953856	9.10211090	2.36234876		57.00000000	0.60245614	5.48362260	1.239155
58	0.26929572	9.08613490	2.44685724		58.00000000	0.59206897	5.37961849	1.260529
59	0.27951953	9.09674360	2.54271750		59.00000000	0.58203390	5.29461314	1.282006
60	0.28931388	9.08936690	2.62968000		60.00000000	0.57233333	5.20214766	1.303385
61	0.29947069	9.09498600	2.72368173		61.00000000	0.56295082	5.12002982	1.324730
62	0.30931196	9.09145360	2.81209533		62.00000000	0.55387097	5.03549220	1.346113
63	0.31942037	9.09280680	2.90442771		63.00000000	0.54507937	4.95630136	1.367600
64	0.32925642	9.09083270	2.99321503		64.00000000	0.53656250	4.87779992	1.388989
65	0.33940133	9.08232590	3.08255349		65.00000000	0.52830769	4.79826264	1.410339
66	0.34921131	9.08952900	3.17416633		66.00000000	0.52030303	4.72930948	1.431717
67	0.35933092	9.07830910	3.26211716		67.00000000	0.51253731	4.65297216	1.453199
68	0.36949888	9.09822370	3.36178347		68.00000000	0.50500000	4.59460297	1.474575
69	0.37935132	9.08457950	3.44624722		69.00000000	0.49768116	4.52122406	1.495926
70	0.38950217	9.08330440	3.53796677		70.00000000	0.49057143	4.45600962	1.517308
71	0.39932629	9.07043080	3.62206148		71.00000000	0.48366197	4.38702245	1.538790
72	0.40944886	9.11974430	3.73406891		72.00000000	0.47694444	4.34961138	1.560178
73	0.41929311	9.07250310	3.80403804		73.00000000	0.47041096	4.26780488	1.581537
74	0.42938888	9.08944420	3.90290626		74.00000000	0.46405405	4.21799343	1.602908
75	0.43925470	9.08133790	3.98902035		75.00000000	0.45786667	4.15804191	1.624417
76	0.44939217	9.08363820	4.08211588		76.00000000	0.45184211	4.10437021	1.645853
77	0.45952886	9.08381840	4.17427671		77.00000000	0.44597403	4.05114706	1.667201
78	0.46941179	9.06105610	4.25336656		78.00000000	0.44025641	3.98918803	1.688588
79	0.47950312	9.07959270	4.35369303		79.00000000	0.43468354	3.94674954	1.710066
80	0.48936522	9.06074240	4.43401220		80.00000000	0.42925000	3.88932368	1.731445
81	0.49946621	9.03133010	4.51084422		81.00000000	0.42395062	3.82883797	1.752811
82	0.50928956	9.05311110	4.61065497		82.00000000	0.41878049	3.79126628	1.774167
83	0.51944566	8.99644950	4.67316665		83.00000000	0.41373494	3.72214549	1.795666
84	0.52925193	8.97527980	4.75018416		84.00000000	0.40880952	3.66917986	1.817070
85	0.53936708	8.91684720	4.80945384		85.00000000	0.40400000	3.60240627	1.838460
86	0.54952389	8.86445330	4.87122886		86.00000000	0.39930233	3.53959682	1.859798
87	0.55935174	8.76978780	4.90539607		87.00000000	0.39471264	3.46154613	1.881259
88	0.56947577	8.64192010	4.92136410		88.00000000	0.39022727	3.37231291	1.902643
89	0.57929248	8.44715790	4.89337505		89.00000000	0.38584270	3.25927418	1.924030
90	0.58944112	8.20563320	4.83673762		90.00000000	0.38155556	3.13090493	1.945521
91	0.59921759	7.86957360	4.71558693		91.00000000	0.37736264	2.96968305	1.966896
92	0.60931563	7.41117570	4.51574519		92.00000000	0.37326087	2.76630189	1.988360
93	0.61912489	6.79518650	4.20706909		93.00000000	0.36924731	2.50910435	2.009774
94	0.62925118	5.99618480	3.77310636		94.00000000	0.36531915	2.19052113	2.031273
95	0.63938713	4.93673900	3.15648738		95.00000000	0.36147368	1.78450123	2.052672
96	0.64914507	3.66691110	2.38035726		96.00000000	0.35770833	1.31168466	2.074014
97	0.65929067	2.03638050	1.34256666		97.00000000	0.35402062	0.72092068	2.095387
98	0.66897339	0.12305164	0.08231827		98.00000000	0.35040816	0.04311830	2.116870
99	0.67910045	-2.22526450	-1.51117812		99.00000000	0.34686869	-0.77187458	2.138303
100	0.68883157	-4.90024850	-3.37544587		100.00000000	0.34340000	-1.68274533	2.159673
101	0.69903600	-8.12290000	-5.67819952		101.00000000	0.34000000	-2.76178600	2.181060
