# Supplementary material for: Study on the Electrical Injection Regeneration of Industrialized B-Doped Czochralski Silicon PERC Solar Cells
Source: Hindawi journal article supplement (doi:10.1155/2019/5357370), 2019-06-20
Supplement: f1 [file 5357370.f1.zip › section3.3/IVRawData_3-16-10h.csv]

07:06 04/04/2018
Test Lot:	JK-PERC
Recipe:	Recipe_YJX-LID
Cell Name:	3-16-10h
Test Order:	2
Test Condition:	Light
1	-0.29986480	9.11623950	-2.73363933		1.00000000	34.34000000	313.05166443	0.000000
2	-0.29010734	9.08865450	-2.63668538		2.00000000	17.17000000	156.05219777	0.061790
3	-0.27996808	9.09466270	-2.54621525		3.00000000	11.44666667	104.10357237	0.083219
4	-0.27017418	9.10981460	-2.46123669		4.00000000	8.58500000	78.20775834	0.104592
5	-0.26001036	9.09501170	-2.36479727		5.00000000	6.86800000	62.46454036	0.126074
6	-0.24986514	9.10570720	-2.27519880		6.00000000	5.72333333	52.11499754	0.147446
7	-0.24004072	9.09681890	-2.18360696		7.00000000	4.90571429	44.62639443	0.168823
8	-0.22993645	9.09803200	-2.09196918		8.00000000	4.29250000	39.05330236	0.190258
9	-0.22010905	9.09722420	-2.00238138		9.00000000	3.81555556	34.71096434	0.211729
10	-0.20993555	9.10007670	-1.91042961		10.00000000	3.43400000	31.24966339	0.233147
11	-0.20007762	9.09500980	-1.81970791		11.00000000	3.12181818	28.39296696	0.254550
12	-0.18995400	9.10685540	-1.72988361		12.00000000	2.86166667	26.06078454	0.275893
13	-0.18018316	9.08613970	-1.63716936		13.00000000	2.64153846	24.00138748	0.297392
14	-0.17002976	9.09831710	-1.54698467		14.00000000	2.45285714	22.31687209	0.318776
15	-0.16020086	9.10243800	-1.45821840		15.00000000	2.28933333	20.83851473	0.340131
16	-0.15004301	9.11135480	-1.36709510		16.00000000	2.14625000	19.55524524	0.361497
17	-0.13989779	9.09409710	-1.27224409		17.00000000	2.02000000	18.37007614	0.382975
18	-0.13009644	9.09829900	-1.18365631		18.00000000	1.90777778	17.35753265	0.404356
19	-0.11993113	9.09808730	-1.09114389		19.00000000	1.80736842	16.44359568	0.425748
20	-0.11010893	9.10300540	-1.00232218		20.00000000	1.71700000	15.62986027	0.447092
21	-0.09992725	9.09603120	-0.90894142		21.00000000	1.63523810	14.87417673	0.468572
22	-0.09011325	9.09633640	-0.81970039		22.00000000	1.56090909	14.19855418	0.489954
23	-0.07997102	9.10759450	-0.72834358		23.00000000	1.49304348	13.59803457	0.511335
24	-0.07015999	9.10485740	-0.63879668		24.00000000	1.43083333	13.02753346	0.532819
25	-0.06000510	9.09748270	-0.54589535		25.00000000	1.37360000	12.49630224	0.554199
26	-0.04985021	9.09776500	-0.45352550		26.00000000	1.32076923	12.01604808	0.575550
27	-0.04002653	9.09553910	-0.36406284		27.00000000	1.27185185	11.56817825	0.596924
28	-0.02992225	9.09990980	-0.27228980		28.00000000	1.22642857	11.16038938	0.618399
29	-0.02005093	9.09671880	-0.18239771		29.00000000	1.18413793	10.77176978	0.639773
30	-0.00995038	9.10544870	-0.09060267		30.00000000	1.14466667	10.42270361	0.661125
31	-0.00068937	9.08068940	-0.00625994		31.00000000	1.10774194	10.05906045	0.682618
32	0.00945415	9.10668850	0.08609597		32.00000000	1.07312500	9.77261510	0.704085
33	0.01929988	9.10898020	0.17580221		33.00000000	1.04060606	9.47886000	0.725481
34	0.02942173	9.09614660	0.26762435		34.00000000	1.01000000	9.18710807	0.746829
35	0.03922429	9.10362150	0.35708312		35.00000000	0.98114286	8.93195321	0.768209
36	0.04938708	9.09618950	0.44923419		36.00000000	0.95388889	8.67675410	0.789694
37	0.05918518	9.10584740	0.53893119		37.00000000	0.92810811	8.45121080	0.811068
38	0.06935168	9.09495830	0.63075065		38.00000000	0.90368421	8.21897021	0.832421
39	0.07951818	9.11022660	0.72442868		39.00000000	0.88051282	8.02167132	0.853798
40	0.08932894	9.09938910	0.81283876		40.00000000	0.85850000	7.81182554	0.875277
41	0.09946567	9.11561390	0.90669063		41.00000000	0.83756098	7.63488247	0.896653
42	0.10926823	9.08520320	0.99272407		42.00000000	0.81761905	7.42823519	0.918011
43	0.11944665	9.10608100	1.08769087		43.00000000	0.79860465	7.27215864	0.939393
44	0.12925369	9.09175680	1.17514311		44.00000000	0.78045455	7.09570292	0.960870
45	0.13940009	9.09617610	1.26800777		45.00000000	0.76311111	6.94139305	0.982250
46	0.14925550	9.10875320	1.35953151		46.00000000	0.74652174	6.79988228	1.003616
47	0.15936023	9.09664540	1.44964350		47.00000000	0.73063830	6.64635751	1.024984
48	0.16950887	9.10461900	1.54331368		48.00000000	0.71541667	6.51359618	1.046466
49	0.17935237	9.09009360	1.63032983		49.00000000	0.70081633	6.37048600	1.067836
50	0.18950324	9.08647540	1.72191653		50.00000000	0.68680000	6.24059130	1.089237
51	0.19927008	9.10471440	1.81429717		51.00000000	0.67333333	6.13050770	1.110590
52	0.20942840	9.09907820	1.90560539		52.00000000	0.66038462	6.00889126	1.132063
53	0.21925478	9.10383610	1.99605958		53.00000000	0.64792453	5.89859871	1.153456
54	0.22938482	9.08999350	2.08510652		54.00000000	0.63592593	5.78056253	1.174838
55	0.23923352	9.10476400	2.17816474		55.00000000	0.62436364	5.68468356	1.196324
56	0.24936877	9.08301730	2.26502085		56.00000000	0.61321429	5.56983597	1.217725
57	0.25953901	9.10813710	2.36391689		57.00000000	0.60245614	5.48725312	1.239071
58	0.26935348	9.09908010	2.45086889		58.00000000	0.59206897	5.38728294	1.260442
59	0.27949914	9.10458760	2.54472440		59.00000000	0.58203390	5.29917861	1.281926
60	0.28933892	9.09832760	2.63250028		60.00000000	0.57233333	5.20727616	1.303307
61	0.29947937	9.09677410	2.72429618		61.00000000	0.56295082	5.12103644	1.324667
62	0.30929160	9.08441730	2.80973396		62.00000000	0.55387097	5.03159500	1.346045
63	0.31945813	9.10955050	2.91011997		63.00000000	0.54507937	4.96542800	1.367527
64	0.32924804	9.09620480	2.99490760		64.00000000	0.53656250	4.88068239	1.388923
65	0.33939964	9.10037520	3.08866407		65.00000000	0.52830769	4.80779822	1.410274
66	0.34923795	9.09225080	3.17535903		66.00000000	0.52030303	4.73072564	1.431648
67	0.35936722	9.09708400	3.26919379		67.00000000	0.51253731	4.66259499	1.453135
68	0.36950991	9.10027310	3.36264109		68.00000000	0.50500000	4.59563792	1.474519
69	0.37932217	9.08622170	3.44660533		69.00000000	0.49768116	4.52204135	1.495861
70	0.38945144	9.09385490	3.54161489		70.00000000	0.49057143	4.46118539	1.517246
71	0.39930910	9.09198570	3.63051263		71.00000000	0.48366197	4.39744773	1.538716
72	0.40943837	9.10210900	3.72675267		72.00000000	0.47694444	4.34120032	1.560084
73	0.41930273	9.08321570	3.80861714		73.00000000	0.47041096	4.27284421	1.581451
74	0.42939407	9.09760000	3.90645549		74.00000000	0.46405405	4.22177816	1.602826
75	0.43921968	9.06661700	3.98223662		75.00000000	0.45786667	4.15130170	1.624285
76	0.44938472	9.08301070	4.08176622		76.00000000	0.45184211	4.10408668	1.645651
77	0.45952815	9.09173200	4.17790679		77.00000000	0.44597403	4.05467632	1.667000
78	0.46939099	9.06556890	4.25529636		78.00000000	0.44025641	3.99117482	1.688366
79	0.47953069	9.07247830	4.35053178		79.00000000	0.43468354	3.94365702	1.709841
80	0.48934367	9.05810740	4.43252752		80.00000000	0.42925000	3.88819260	1.731220
81	0.49947968	9.05375390	4.52216610		81.00000000	0.42395062	3.83834455	1.752605
82	0.50930011	9.03053000	4.59924992		82.00000000	0.41878049	3.78180976	1.773939
83	0.51943314	9.01280980	4.68155209		83.00000000	0.41373494	3.72891432	1.795412
84	0.52923942	8.96663860	4.74549861		84.00000000	0.40880952	3.66564726	1.816802
85	0.53937018	8.92947290	4.81629141		85.00000000	0.40400000	3.60750705	1.838199
86	0.54949498	8.85888480	4.86791273		86.00000000	0.39930233	3.53737330	1.859677
87	0.55932212	8.76978870	4.90513681		87.00000000	0.39471264	3.46154648	1.881065
88	0.56942612	8.63258270	4.91561807		88.00000000	0.39022727	3.36866920	1.902426
89	0.57928675	8.44947910	4.89467129		89.00000000	0.38584270	3.26016980	1.923806
90	0.58939368	8.17487530	4.81821984		90.00000000	0.38155556	3.11916909	1.945283
91	0.59922528	7.84128900	4.69869860		91.00000000	0.37736264	2.95900950	1.966668
92	0.60931814	7.37455370	4.49344934		92.00000000	0.37326087	2.75263233	1.988138
93	0.61911994	6.76335760	4.18732955		93.00000000	0.36924731	2.49735161	2.009586
94	0.62924254	5.94664620	3.74188276		94.00000000	0.36531915	2.17242373	2.031077
95	0.63934577	4.89510060	3.12966186		95.00000000	0.36147368	1.76945005	2.052469
96	0.64916545	3.62958100	2.35619858		96.00000000	0.35770833	1.29833137	2.073807
97	0.65920842	2.01580810	1.32883767		97.00000000	0.35402062	0.71363763	2.095178
98	0.66898495	0.11290227	0.07552992		98.00000000	0.35040816	0.03956188	2.116657
99	0.67908299	-2.18127250	-1.48126505		99.00000000	0.34686869	-0.75661513	2.138026
100	0.68879622	-4.80696300	-3.31101794		100.00000000	0.34340000	-1.65071109	2.159366
101	0.69903266	-7.93859910	-5.54934005		101.00000000	0.34000000	-2.69912369	2.180743
07:06 04/04/2018
Test Lot:	JK-PERC
Recipe:	Recipe_YJX-LID
Cell Name:	3-16-10h
Test Order:	3
Test Condition:	Light
1	-0.29994369	9.09157180	-2.72695959		1.00000000	34.34000000	312.20457561	0.000000
2	-0.29009470	9.10224910	-2.64051422		2.00000000	17.17000000	156.28561705	0.021500
3	-0.27994278	9.10542010	-2.54899662		3.00000000	11.44666667	104.22670874	0.043054
4	-0.27014887	9.09387490	-2.45670003		4.00000000	8.58500000	78.07091602	0.064442
5	-0.26002151	9.10208610	-2.36673817		5.00000000	6.86800000	62.51312733	0.085827
6	-0.24983910	9.08814050	-2.27057284		6.00000000	5.72333333	52.01445746	0.107184
7	-0.24002136	9.12529280	-2.19026519		7.00000000	4.90571429	44.76607925	0.128676
8	-0.22987542	9.08357140	-2.08808979		8.00000000	4.29250000	38.99123023	0.150076
9	-0.22006439	9.09722610	-2.00197551		9.00000000	3.81555556	34.71097159	0.171462
10	-0.20994002	9.09958740	-1.91036756		10.00000000	3.43400000	31.24798313	0.192939
11	-0.20013270	9.08835600	-1.81887722		11.00000000	3.12181818	28.37219500	0.214330
12	-0.18997410	9.10274310	-1.72928543		12.00000000	2.86166667	26.04901650	0.235682
13	-0.18018390	9.10185530	-1.64000779		13.00000000	2.64153846	24.04290085	0.257056
14	-0.17002901	9.09075740	-1.54569248		14.00000000	2.45285714	22.29832922	0.278555
15	-0.16022617	9.12031460	-1.46131308		15.00000000	2.28933333	20.87944022	0.299932
16	-0.15008096	9.08080770	-1.36285634		16.00000000	2.14625000	19.48968353	0.321276
17	-0.13991417	9.10075090	-1.27332401		17.00000000	2.02000000	18.38351682	0.342664
18	-0.13009718	9.10329440	-1.18431293		18.00000000	1.90777778	17.36706276	0.364149
19	-0.11997356	9.10180190	-1.09197558		19.00000000	1.80736842	16.45030933	0.385519
20	-0.11010893	9.09488770	-1.00142835		20.00000000	1.71700000	15.61592218	0.406884
21	-0.09997712	9.09588620	-0.90938052		21.00000000	1.63523810	14.87393962	0.428265
22	-0.09011027	9.10843750	-0.82076378		22.00000000	1.56090909	14.21744290	0.449733
23	-0.08001418	9.09940530	-0.72808149		23.00000000	1.49304348	13.58580774	0.471116
24	-0.07021952	9.09946540	-0.63896013		24.00000000	1.43083333	13.01981841	0.492469
25	-0.06002817	9.08856490	-0.54556991		25.00000000	1.37360000	12.48405275	0.513843
26	-0.04985542	9.10728070	-0.45404732		26.00000000	1.32076923	12.02861612	0.535331
27	-0.04007044	9.09109590	-0.36428422		27.00000000	1.27185185	11.56252716	0.556709
28	-0.02987685	9.10404680	-0.27200025		28.00000000	1.22642857	11.16546311	0.578069
29	-0.02007996	9.09510330	-0.18262932		29.00000000	1.18413793	10.76985680	0.599443
30	-0.00994294	9.10240460	-0.09050464		30.00000000	1.14466667	10.41921913	0.620917
31	-0.00066406	9.08487800	-0.00603293		31.00000000	1.10774194	10.06370034	0.642434
32	0.00947126	9.09549710	0.08614586		32.00000000	1.07312500	9.76060533	0.663810
33	0.01929467	9.10152530	0.17561093		33.00000000	1.04060606	9.47110239	0.685181
34	0.02945150	9.10632320	0.26819487		34.00000000	1.01000000	9.19738643	0.706681
35	0.03925630	9.09017180	0.35684648		35.00000000	0.98114286	8.91875713	0.728053
36	0.04938633	9.09810730	0.44932217		36.00000000	0.95388889	8.67858346	0.749445
37	0.05922164	9.09580230	0.53866837		37.00000000	0.92810811	8.44188786	0.770794
38	0.06936508	9.09781840	0.63107087		38.00000000	0.90368421	8.22155484	0.792274
39	0.07946014	9.09133820	0.72239898		39.00000000	0.88051282	8.00503984	0.813660
40	0.08932521	9.09712600	0.81260271		40.00000000	0.85850000	7.80988267	0.835046
41	0.09944409	9.10374450	0.90531360		41.00000000	0.83756098	7.62494113	0.856525
42	0.10923325	9.08578780	0.99247013		42.00000000	0.81761905	7.42871317	0.877914
43	0.11943697	9.10033700	1.08691668		43.00000000	0.79860465	7.26757146	0.899252
44	0.12923656	9.09295180	1.17514181		44.00000000	0.78045455	7.09663556	0.920633
45	0.13940232	9.09677030	1.26811088		45.00000000	0.76311111	6.94184649	0.942119
46	0.14920117	9.09820750	1.35746320		46.00000000	0.74652174	6.79200969	0.963496
47	0.15941978	9.09725760	1.45028281		47.00000000	0.73063830	6.64680481	0.984839
48	0.16953641	9.09894850	1.54260306		48.00000000	0.71541667	6.50953941	1.006235
49	0.17931293	9.09358600	1.63059755		49.00000000	0.70081633	6.37293354	1.027707
50	0.18946305	9.10978790	1.72596820		50.00000000	0.68680000	6.25660233	1.049091
51	0.19932963	9.10161210	1.81422097		51.00000000	0.67333333	6.12841881	1.070446
52	0.20935695	9.09358790	1.90380583		52.00000000	0.66038462	6.00526555	1.091820
53	0.21921311	9.08705230	1.99200100		53.00000000	0.64792453	5.88772408	1.113295
54	0.22938184	9.10508440	2.08854101		54.00000000	0.63592593	5.79015923	1.134685
55	0.23918888	9.09039400	2.17432116		55.00000000	0.62436364	5.67571145	1.156037
56	0.24931891	9.10710720	2.27057404		56.00000000	0.61321429	5.58460824	1.177417
57	0.25948542	9.08628650	2.35775887		57.00000000	0.60245614	5.47408909	1.198906
58	0.26931998	9.09848400	2.45040353		58.00000000	0.59206897	5.38693001	1.220284
59	0.27945375	9.09716420	2.54223665		59.00000000	0.58203390	5.29485794	1.241647
60	0.28930616	9.08642670	2.62875922		60.00000000	0.57233333	5.20046488	1.263022
61	0.29944885	9.09479810	2.72342683		61.00000000	0.56295082	5.11992405	1.284495
62	0.30928862	9.09693910	2.81357974		62.00000000	0.55387097	5.03853046	1.305893
63	0.31944174	9.09118460	2.90410383		63.00000000	0.54507937	4.95541713	1.327255
64	0.32925844	9.09430690	2.99437730		64.00000000	0.53656250	4.87966405	1.348672
65	0.33938998	9.08737660	3.08416456		65.00000000	0.52830769	4.80093096	1.370162
66	0.34920222	9.09879780	3.17732039		66.00000000	0.52030303	4.73413207	1.391532
67	0.35938361	9.09211920	3.26755862		67.00000000	0.51253731	4.66005035	1.412932
68	0.36950916	9.09111980	3.35925204		68.00000000	0.50500000	4.59101550	1.434283
69	0.37931919	9.09257510	3.44898822		69.00000000	0.49768116	4.52520332	1.455755
70	0.38951769	9.09636310	3.54319434		70.00000000	0.49057143	4.46241584	1.477143
71	0.39929122	9.09208770	3.63039079		71.00000000	0.48366197	4.39749707	1.498565
72	0.40946740	9.08348460	3.71939082		72.00000000	0.47694444	4.33231752	1.520065
73	0.41926923	9.09484770	3.81318979		73.00000000	0.47041096	4.27831603	1.541475
74	0.42941490	9.08603100	3.90167709		74.00000000	0.46405405	4.21640952	1.562830
75	0.43919662	9.08314420	3.98928623		75.00000000	0.45786667	4.15886896	1.584216
76	0.44941002	9.07679560	4.07920289		76.00000000	0.45184211	4.10127843	1.605698
77	0.45952666	9.07611660	4.17071755		77.00000000	0.44597403	4.04771226	1.627083
78	0.46939248	9.06709960	4.25602837		78.00000000	0.44025641	3.99184872	1.648436
79	0.47949499	9.06161400	4.34499851		79.00000000	0.43468354	3.93893449	1.669824
80	0.48933849	9.06309800	4.43492269		80.00000000	0.42925000	3.89033482	1.691310
81	0.49944395	9.05090810	4.52042129		81.00000000	0.42395062	3.83713808	1.712702
82	0.50924206	9.02150920	4.59413193		82.00000000	0.41878049	3.77803202	1.734058
83	0.51940411	9.00793650	4.67875924		83.00000000	0.41373494	3.72689807	1.755427
84	0.52919549	8.97823430	4.75124110		84.00000000	0.40880952	3.67038769	1.776902
85	0.53934342	8.91966340	4.81076176		85.00000000	0.40400000	3.60354401	1.798279
86	0.54952550	8.85967250	4.86861596		86.00000000	0.39930233	3.53768783	1.819628
87	0.55930579	8.76378920	4.90163804		87.00000000	0.39471264	3.45917840	1.841016
88	0.56945884	8.64191150	4.92121290		88.00000000	0.39022727	3.37230956	1.862500
89	0.57932770	8.45677760	4.89924552		89.00000000	0.38584270	3.26298587	1.883880
90	0.58941746	8.20264910	4.83478460		90.00000000	0.38155556	3.12976633	1.945580
91	0.59925336	7.86739870	4.71456511		91.00000000	0.37736264	2.96886232	1.966966
92	0.60939074	7.38906290	4.50282651		92.00000000	0.37326087	2.75804804	1.988431
93	0.61923188	6.79747820	4.20921521		93.00000000	0.36924731	2.50995055	2.009847
94	0.62932163	5.98040060	3.76359545		94.00000000	0.36531915	2.18475486	2.031346
95	0.63941658	4.92049840	3.14624826		95.00000000	0.36147368	1.77863068	2.052776
96	0.64918774	3.66019770	2.37615547		96.00000000	0.35770833	1.30928322	2.074226
97	0.65931845	2.02333160	1.33401985		97.00000000	0.35402062	0.71630110	2.095588
98	0.66901368	0.10444000	0.06987179		98.00000000	0.35040816	0.03659663	2.117064
99	0.67917341	-2.24199220	-1.52270149		99.00000000	0.34686869	-0.77767689	2.138473
100	0.68885750	-4.91537860	-3.38599541		100.00000000	0.34340000	-1.68794101	2.159865
101	0.69911844	-8.13947010	-5.69045364		101.00000000	0.34000000	-2.76741983	2.181206
07:06 04/04/2018
Test Lot:	JK-PERC
Recipe:	Recipe_YJX-LID
Cell Name:	3-16-10h
Test Order:	4
Test Condition:	Light
1	-0.29989076	9.09583950	-2.72775822		1.00000000	34.34000000	312.35112843	0.000000
2	-0.29009032	9.10844140	-2.64227068		2.00000000	17.17000000	156.39193884	0.061784
3	-0.27999744	9.08123490	-2.54272252		3.00000000	11.44666667	103.94986882	0.083190
4	-0.27015683	9.09882350	-2.45810931		4.00000000	8.58500000	78.11339975	0.104682
5	-0.25999096	9.10262870	-2.36660117		5.00000000	6.86800000	62.51685391	0.126067
6	-0.24981992	9.10087110	-2.27357889		6.00000000	5.72333333	52.08731893	0.147557
7	-0.23997633	9.09545610	-2.18269417		7.00000000	4.90571429	44.61970892	0.168977
8	-0.22984546	9.09206100	-2.08976894		8.00000000	4.29250000	39.02767184	0.190472
9	-0.22006813	9.11349960	-2.00559081		9.00000000	3.81555556	34.77306403	0.211845
10	-0.20981818	9.10310460	-1.90999684		10.00000000	3.43400000	31.26006120	0.233182
11	-0.20002893	9.09349820	-1.81896271		11.00000000	3.12181818	28.38824802	0.254566
12	-0.18991071	9.09069250	-1.72641987		12.00000000	2.86166667	26.01453170	0.276049
13	-0.18015569	9.10399250	-1.64013605		13.00000000	2.64153846	24.04854634	0.297488
14	-0.16996901	9.09526060	-1.54591244		14.00000000	2.45285714	22.30937493	0.318835
15	-0.16011947	9.09655760	-1.45653598		15.00000000	2.28933333	20.82505253	0.340201
16	-0.14996703	9.09613990	-1.36412109		16.00000000	2.14625000	19.52259026	0.361671
17	-0.13981383	9.10597800	-1.27314166		17.00000000	2.02000000	18.39407556	0.383045
18	-0.13004988	9.08380510	-1.18134776		18.00000000	1.90777778	17.32988151	0.404406
19	-0.11987510	9.11009880	-1.09207400		19.00000000	1.80736842	16.46530488	0.425784
20	-0.11007617	9.09441950	-1.00107887		20.00000000	1.71700000	15.61511828	0.447262
21	-0.09990363	9.09080310	-0.90820421		21.00000000	1.63523810	14.86562755	0.468633
22	-0.09007642	9.09674740	-0.81940248		22.00000000	1.56090909	14.19919571	0.489983
23	-0.07993067	9.10170940	-0.72750574		23.00000000	1.49304348	13.58924786	0.511350
24	-0.07014366	9.09795090	-0.63816353		24.00000000	1.43083333	13.01765141	0.532827
25	-0.06000981	9.09019370	-0.54550077		25.00000000	1.37360000	12.48629007	0.554209
26	-0.04980452	9.09894560	-0.45316858		26.00000000	1.32076923	12.01760738	0.575591
27	-0.04001824	9.08762360	-0.36367072		27.00000000	1.27185185	11.55811090	0.596931
28	-0.02986877	9.09694770	-0.27171461		28.00000000	1.22642857	11.15675657	0.618426
29	-0.02001700	9.10274890	-0.18220971		29.00000000	1.18413793	10.77891025	0.639805
30	-0.00993674	9.09086990	-0.09033362		30.00000000	1.14466667	10.40601575	0.661187
31	-0.00060521	9.09301280	-0.00550317		31.00000000	1.10774194	10.07271160	0.682705
32	0.00953066	9.09542940	0.08668543		32.00000000	1.07312500	9.76053267	0.704175
33	0.01926233	9.09394550	0.17517053		33.00000000	1.04060606	9.46321480	0.725561
34	0.02945542	9.09639740	0.26793821		34.00000000	1.01000000	9.18736137	0.746921
35	0.03932105	9.10001850	0.35782225		35.00000000	0.98114286	8.92841815	0.768290
36	0.04943898	9.09523870	0.44965929		36.00000000	0.95388889	8.67584714	0.789785
37	0.05923167	9.08016870	0.53783355		37.00000000	0.92810811	8.42737819	0.811162
38	0.06936894	9.10515880	0.63161525		38.00000000	0.90368421	8.22818824	0.832523
39	0.07948390	9.09313580	0.72275786		39.00000000	0.88051282	8.00662265	0.853892
40	0.08941352	9.09921930	0.81359326		40.00000000	0.85850000	7.81167977	0.875363
41	0.09950019	9.09296890	0.90475217		41.00000000	0.83756098	7.61591590	0.896796
42	0.10934126	9.09387020	0.99433523		42.00000000	0.81761905	7.43532149	0.918191
43	0.11945175	9.08369350	1.08506309		43.00000000	0.79860465	7.25427988	0.939535
44	0.12929505	9.11074920	1.17797477		44.00000000	0.78045455	7.11052563	0.960999
45	0.13947177	9.08439920	1.26701724		45.00000000	0.76311111	6.93240597	0.982362
46	0.14925478	9.11404710	1.36031509		46.00000000	0.74652174	6.80383429	1.003737
47	0.15942854	9.09105680	1.44937391		47.00000000	0.73063830	6.64227427	1.025231
48	0.16951297	9.10414890	1.54327132		48.00000000	0.71541667	6.51325986	1.046601
49	0.17943144	9.08862500	1.63078507		49.00000000	0.70081633	6.36945679	1.067941
50	0.18956350	9.09782410	1.72461538		50.00000000	0.68680000	6.24838559	1.089321
51	0.19928624	9.09350680	1.81221078		51.00000000	0.67333333	6.12296125	1.110797
52	0.20948604	9.09648230	1.90558605		52.00000000	0.66038462	6.00717697	1.132167
53	0.21933901	9.10120680	1.99624969		53.00000000	0.64792453	5.89689512	1.153543
54	0.22945395	9.09991170	2.08801068		54.00000000	0.63592593	5.78686977	1.174917
55	0.23924516	9.10083100	2.17732977		55.00000000	0.62436364	5.68222794	1.196402
56	0.24944644	9.10266210	2.27062666		56.00000000	0.61321429	5.58188244	1.217787
57	0.25953758	9.08628650	2.35823281		57.00000000	0.60245614	5.47408909	1.239143
58	0.26936674	9.09968950	2.45115370		58.00000000	0.59206897	5.38764375	1.260525
59	0.27948242	9.09624200	2.54223973		59.00000000	0.58203390	5.29432119	1.282009
60	0.28933838	9.09450440	2.63138917		60.00000000	0.57233333	5.20508802	1.303398
61	0.29942876	9.08850960	2.72136116		61.00000000	0.56295082	5.11638393	1.324749
62	0.30926910	9.09129330	2.81165610		62.00000000	0.55387097	5.03540342	1.346126
63	0.31939670	9.09860520	2.90606448		63.00000000	0.54507937	4.95946195	1.367616
64	0.32925937	9.09310250	2.99398920		64.00000000	0.53656250	4.87901781	1.389007
65	0.33943534	9.10700130	3.09123808		65.00000000	0.52830769	4.81129884	1.410365
66	0.34927416	9.08606820	3.17352884		66.00000000	0.52030303	4.72750882	1.431741
67	0.35937870	9.09469800	3.26844074		67.00000000	0.51253731	4.66137208	1.453218
68	0.36958742	9.09116650	3.35998077		68.00000000	0.50500000	4.59103908	1.474601
69	0.37937045	9.09869670	3.45177666		69.00000000	0.49768116	4.52824992	1.495961
70	0.38953748	9.09455300	3.54266926		70.00000000	0.49057143	4.46152786	1.517341
71	0.39936888	9.09137060	3.63081049		71.00000000	0.48366197	4.39715023	1.538817
72	0.40951955	9.07355980	3.71580013		72.00000000	0.47694444	4.32758394	1.560190
73	0.41932938	9.09804250	3.81507652		73.00000000	0.47041096	4.27981890	1.581573
74	0.42954701	9.08329110	3.90170053		74.00000000	0.46405405	4.21513806	1.602921
75	0.43927348	9.09462640	3.99502819		75.00000000	0.45786667	4.16412627	1.624382
76	0.44950005	9.07063770	4.07725210		76.00000000	0.45184211	4.09849603	1.645757
77	0.45958599	9.08732800	4.17640864		77.00000000	0.44597403	4.05271225	1.667138
78	0.46945682	9.06656070	4.25635875		78.00000000	0.44025641	3.99161147	1.688625
79	0.47953901	9.06948470	4.34917171		79.00000000	0.43468354	3.94235575	1.710012
80	0.48940316	9.05336090	4.43074343		80.00000000	0.42925000	3.88615517	1.731359
81	0.49949652	9.04907040	4.51997917		81.00000000	0.42395062	3.83635898	1.752749
82	0.50935173	9.03764150	4.60333833		82.00000000	0.41878049	3.78478792	1.774222
83	0.51953441	9.00635340	4.67911050		83.00000000	0.41373494	3.72624308	1.795600
84	0.52926755	8.97378830	4.74953495		84.00000000	0.40880952	3.66857012	1.816964
85	0.53946066	8.92887780	4.81677831		85.00000000	0.40400000	3.60726663	1.838333
86	0.54961061	8.86846260	4.87420114		86.00000000	0.39930233	3.54119774	1.859809
87	0.55938095	8.75880910	4.89951096		87.00000000	0.39471264	3.45721270	1.881180
88	0.56950855	8.63545230	4.91796392		88.00000000	0.39022727	3.36978900	1.902543
89	0.57933772	8.44744970	4.89392625		89.00000000	0.38584270	3.25938677	1.923923
90	0.58942813	8.21272750	4.84081261		90.00000000	0.38155556	3.13361180	1.945392
91	0.59918952	7.86084130	4.71013373		91.00000000	0.37736264	2.96638780	1.966767
92	0.60932755	7.38519480	4.50000265		92.00000000	0.37326087	2.75660423	1.988225
93	0.61911356	6.79569770	4.20730860		93.00000000	0.36924731	2.50929311	2.009630
94	0.62926644	5.96546980	3.75386994		94.00000000	0.36531915	2.17930035	2.031130
95	0.63939929	4.91629510	3.14347560		95.00000000	0.36147368	1.77711130	2.052516
96	0.64919496	3.64704730	2.36764473		96.00000000	0.35770833	1.30457921	2.073867
97	0.65927941	2.00815510	1.32393531		97.00000000	0.35402062	0.71092831	2.095242
98	0.66896790	0.10071852	0.06737746		98.00000000	0.35040816	0.03529259	2.116730
99	0.67909324	-2.24009700	-1.52123473		99.00000000	0.34686869	-0.77701950	2.138105
100	0.68880630	-4.91016050	-3.38214949		100.00000000	0.34340000	-1.68614912	2.159524
101	0.69905519	-8.11988930	-5.67625076		101.00000000	0.34000000	-2.76076236	2.180897
