# Supplementary material for: Study on the Electrical Injection Regeneration of Industrialized B-Doped Czochralski Silicon PERC Solar Cells
Source: Hindawi journal article supplement (doi:10.1155/2019/5357370), 2019-06-20
Supplement: f1 [file 5357370.f1.zip › section3.3/IVRawData_3-16-11h.csv]

08:07 04/04/2018
Test Lot:	JK-PERC
Recipe:	Recipe_YJX-LID
Cell Name:	3-16-11h
Test Order:	2
Test Condition:	Light
1	-0.29989272	9.08067040	-2.72322695		1.00000000	34.34000000	311.83022154	0.000000
2	-0.29012287	9.10565190	-2.64175786		2.00000000	17.17000000	156.34404312	0.061780
3	-0.28000993	9.08368870	-2.54352304		3.00000000	11.44666667	103.97795665	0.083200
4	-0.27017906	9.09793000	-2.45807018		4.00000000	8.58500000	78.10572905	0.104697
5	-0.26000360	9.08977700	-2.36337474		5.00000000	6.86800000	62.42858844	0.126071
6	-0.24984451	9.09347720	-2.27195536		6.00000000	5.72333333	52.04500117	0.147488
7	-0.24005233	9.09437660	-2.18312629		7.00000000	4.90571429	44.61441321	0.168837
8	-0.22991630	9.10177800	-2.09264712		8.00000000	4.29250000	39.06938207	0.190322
9	-0.22006609	9.08430960	-1.99914849		9.00000000	3.81555556	34.66168796	0.211756
10	-0.20993453	9.09296320	-1.90892696		10.00000000	3.43400000	31.22523563	0.233157
11	-0.20010515	9.10293670	-1.82154451		11.00000000	3.12181818	28.41771330	0.254567
12	-0.18995649	9.08555510	-1.72586016		12.00000000	2.86166667	25.99983018	0.276046
13	-0.18017696	9.09114740	-1.63801530		13.00000000	2.64153846	24.01461552	0.297418
14	-0.17005062	9.08653640	-1.54517115		14.00000000	2.45285714	22.28797571	0.318826
15	-0.16022941	9.09090520	-1.45663038		15.00000000	2.28933333	20.81211230	0.340183
16	-0.15009117	9.09595390	-1.36522236		16.00000000	2.14625000	19.52219106	0.361674
17	-0.13991645	9.08833500	-1.27160757		17.00000000	2.02000000	18.35843670	0.383068
18	-0.13010046	9.10378930	-1.18440718		18.00000000	1.90777778	17.36800692	0.404441
19	-0.11992425	9.08722400	-1.08977852		19.00000000	1.80736842	16.42396169	0.425807
20	-0.11012316	9.09216210	-1.00125762		20.00000000	1.71700000	15.61124233	0.447276
21	-0.09997151	9.09692670	-0.90943350		21.00000000	1.63523810	14.87564109	0.468653
22	-0.09013617	9.09556480	-0.81983938		22.00000000	1.56090909	14.19734978	0.490026
23	-0.07998601	9.09061340	-0.72712192		23.00000000	1.49304348	13.57268105	0.511383
24	-0.07017151	9.09167000	-0.63797624		24.00000000	1.43083333	13.00866449	0.532856
25	-0.06002656	9.08898640	-0.54558062		25.00000000	1.37360000	12.48463172	0.554225
26	-0.04986822	9.09109590	-0.45335676		26.00000000	1.32076923	12.00723974	0.575614
27	-0.04005297	9.09135910	-0.36413596		27.00000000	1.27185185	11.56286191	0.597089
28	-0.02990207	9.08671950	-0.27171173		28.00000000	1.22642857	11.14421242	0.618471
29	-0.02005929	9.09583570	-0.18245602		29.00000000	1.18413793	10.77072407	0.639827
30	-0.00993220	9.08227730	-0.09020703		30.00000000	1.14466667	10.39618008	0.661207
31	-0.00066250	9.11187840	-0.00603662		31.00000000	1.10774194	10.09360981	0.682801
32	0.00947257	9.08232880	0.08603296		32.00000000	1.07312500	9.74647409	0.704178
33	0.01926446	9.09796810	0.17526742		33.00000000	1.04060606	9.46740074	0.725518
34	0.02939498	9.07616040	0.26679353		34.00000000	1.01000000	9.16692200	0.746905
35	0.03920101	9.08414650	0.35610772		35.00000000	0.98114286	8.91284545	0.768383
36	0.04936279	9.10141470	0.44927119		36.00000000	0.95388889	8.68173836	0.789760
37	0.05922910	9.08881280	0.53832222		37.00000000	0.92810811	8.43540085	0.811131
38	0.06936334	9.08060170	0.62986087		38.00000000	0.90368421	8.20599638	0.832500
39	0.07950503	9.11420540	0.72462514		39.00000000	0.88051282	8.02517470	0.853979
40	0.08932520	9.06162260	0.80943122		40.00000000	0.85850000	7.77940300	0.875364
41	0.09943935	9.10796170	0.90568975		41.00000000	0.83756098	7.62847329	0.896720
42	0.10927217	9.09167290	0.99346683		42.00000000	0.81761905	7.43352494	0.918140
43	0.11944064	9.07962230	1.08447590		43.00000000	0.79860465	7.25102860	0.939625
44	0.12924668	9.10111050	1.17628832		44.00000000	0.78045455	7.10300306	0.961012
45	0.13940102	9.10155960	1.26876669		45.00000000	0.76311111	6.94550126	0.982367
46	0.14921375	9.07376100	1.35392991		46.00000000	0.74652174	6.77375984	1.003745
47	0.15936659	9.08953190	1.44856770		47.00000000	0.73063830	6.64116012	1.025203
48	0.16954102	9.08888630	1.54093905		48.00000000	0.71541667	6.50234074	1.046583
49	0.17932844	9.08225730	1.62870703		49.00000000	0.70081633	6.36499420	1.067938
50	0.18949990	9.09008120	1.72256948		50.00000000	0.68680000	6.24306777	1.089290
51	0.19928434	9.08031650	1.80956488		51.00000000	0.67333333	6.11407978	1.110761
52	0.20941859	9.08908940	1.90342429		52.00000000	0.66038462	6.00229481	1.132129
53	0.21926481	9.09316540	1.99381118		53.00000000	0.64792453	5.89168490	1.153501
54	0.22937970	9.08195020	2.08321501		54.00000000	0.63592593	5.77544759	1.174854
55	0.23923634	9.09003930	2.17466773		55.00000000	0.62436364	5.67548999	1.196333
56	0.24937132	9.08781620	2.26624072		56.00000000	0.61321429	5.57277872	1.217712
57	0.25949812	9.09191320	2.35933438		57.00000000	0.60245614	5.47747893	1.239114
58	0.26935402	9.08832840	2.44797779		58.00000000	0.59206897	5.38091719	1.260593
59	0.27951580	9.07461550	2.53649841		59.00000000	0.58203390	5.28173384	1.281982
60	0.28933373	9.09566020	2.63168129		60.00000000	0.57233333	5.20574952	1.303339
61	0.29943672	9.08931350	2.72167422		61.00000000	0.56295082	5.11683649	1.324711
62	0.30931494	9.09067540	2.81188172		62.00000000	0.55387097	5.03506118	1.346191
63	0.31939039	9.08096890	2.90037420		63.00000000	0.54507937	4.94984876	1.367573
64	0.32920906	9.10937500	2.99888878		64.00000000	0.53656250	4.88774902	1.388910
65	0.33940658	9.07417960	3.07983626		65.00000000	0.52830769	4.79395888	1.410293
66	0.34922376	9.08197690	3.17164212		66.00000000	0.52030303	4.72538010	1.431778
67	0.35936397	9.07970710	3.26291959		67.00000000	0.51253731	4.65368868	1.453146
68	0.36952797	9.08879280	3.35856315		68.00000000	0.50500000	4.58984036	1.474500
69	0.37934443	9.08442500	3.44612602		69.00000000	0.49768116	4.52114717	1.495875
70	0.38947123	9.07703880	3.53524547		70.00000000	0.49057143	4.45293589	1.517350
71	0.39929363	9.08986090	3.62952355		71.00000000	0.48366197	4.39642005	1.538748
72	0.40944126	9.07990070	3.71768598		72.00000000	0.47694444	4.33060819	1.560097
73	0.41929418	9.08552460	3.80950759		73.00000000	0.47041096	4.27393034	1.581469
74	0.42939642	9.08128260	3.89947024		74.00000000	0.46405405	4.21420601	1.602951
75	0.43921289	9.06367210	3.98088162		75.00000000	0.45786667	4.14995333	1.624327
76	0.44938731	9.07678790	4.07899330		76.00000000	0.45184211	4.10127495	1.645686
77	0.45952228	9.07535930	4.17032980		77.00000000	0.44597403	4.04737452	1.667067
78	0.46937743	9.06098840	4.25302345		78.00000000	0.44025641	3.98915823	1.688534
79	0.47951689	9.05488870	4.34197207		79.00000000	0.43468354	3.93601111	1.709939
80	0.48934302	9.05064960	4.42887221		80.00000000	0.42925000	3.88499134	1.731294
81	0.49948767	9.03128910	4.51101755		81.00000000	0.42395062	3.82882059	1.752653
82	0.50932127	9.02828120	4.59829565		82.00000000	0.41878049	3.78086800	1.774134
83	0.51946813	8.99462800	4.67242259		83.00000000	0.41373494	3.72139187	1.795504
84	0.52924514	8.95587920	4.73985554		84.00000000	0.40880952	3.66124871	1.816880
85	0.53940398	8.91648480	4.80958739		85.00000000	0.40400000	3.60225986	1.838226
86	0.54951882	8.85223480	4.86446962		86.00000000	0.39930233	3.53471794	1.859701
87	0.55934346	8.75574590	4.89746921		87.00000000	0.39471264	3.45600361	1.881093
88	0.56947249	8.61633400	4.90676518		88.00000000	0.39022727	3.36232852	1.902488
89	0.57927185	8.43936920	4.88868901		89.00000000	0.38584270	3.25626897	1.923976
90	0.58939195	8.17806050	4.82008303		90.00000000	0.38155556	3.12038442	1.945357
91	0.59922850	7.83589220	4.69548993		91.00000000	0.37736264	2.95697295	1.966707
92	0.60930693	7.36318400	4.48643904		92.00000000	0.37326087	2.74838846	1.988185
93	0.61913675	6.76555110	4.18880132		93.00000000	0.36924731	2.49816156	2.009704
94	0.62925386	5.93961720	3.73752705		94.00000000	0.36531915	2.16985590	2.031096
95	0.63937920	4.89517640	3.12987397		95.00000000	0.36147368	1.76947745	2.052446
96	0.64913088	3.61663130	2.34766706		96.00000000	0.35770833	1.29369915	2.073836
97	0.65920633	1.99912880	1.31783836		97.00000000	0.35402062	0.70773281	2.095319
98	0.66893572	0.09962967	0.06664585		98.00000000	0.35040816	0.03491105	2.116689
99	0.67906696	-2.23253580	-1.51604130		99.00000000	0.34686869	-0.77439676	2.138049
100	0.68877178	-4.87504820	-3.35779563		100.00000000	0.34340000	-1.67409155	2.159422
101	0.69902062	-8.06857870	-5.64010289		101.00000000	0.34000000	-2.74331676	2.180907
08:07 04/04/2018
Test Lot:	JK-PERC
Recipe:	Recipe_YJX-LID
Cell Name:	3-16-11h
Test Order:	3
Test Condition:	Light
1	-0.29994184	9.10534670	-2.73107444		1.00000000	34.34000000	312.67760568	0.000000
2	-0.29008269	9.08114910	-2.63428416		2.00000000	17.17000000	155.92333005	0.021572
3	-0.27996898	9.09171010	-2.54539680		3.00000000	11.44666667	104.06977494	0.042959
4	-0.27014333	9.09869580	-2.45795198		4.00000000	8.58500000	78.11230344	0.064361
5	-0.26002815	9.09802150	-2.36574170		5.00000000	6.86800000	62.48521166	0.085757
6	-0.24989809	9.07311340	-2.26735371		6.00000000	5.72333333	51.92845236	0.107241
7	-0.24005605	9.10512260	-2.18573977		7.00000000	4.90571429	44.66713001	0.128627
8	-0.22990738	9.07941530	-2.08742458		8.00000000	4.29250000	38.97339018	0.149982
9	-0.22010107	9.08973690	-2.00066082		9.00000000	3.81555556	34.68239613	0.171355
10	-0.20991221	9.09903340	-1.90999821		10.00000000	3.43400000	31.24608070	0.192842
11	-0.20011558	9.08632950	-1.81831610		11.00000000	3.12181818	28.36586864	0.214237
12	-0.18994829	9.09548660	-1.72767213		12.00000000	2.86166667	26.02825082	0.235584
13	-0.18018886	9.08690830	-1.63735965		13.00000000	2.64153846	24.00341777	0.256965
14	-0.17003722	9.09643650	-1.54673277		14.00000000	2.45285714	22.31225924	0.278442
15	-0.16023016	9.08002090	-1.45489320		15.00000000	2.28933333	20.78719451	0.299810
16	-0.15008374	9.10366730	-1.36631244		16.00000000	2.14625000	19.53874594	0.321175
17	-0.13992687	9.08163640	-1.27076496		17.00000000	2.02000000	18.34490553	0.342539
18	-0.13010716	9.09147930	-1.18286655		18.00000000	1.90777778	17.34452218	0.364029
19	-0.11997858	9.09618570	-1.09134744		19.00000000	1.80736842	16.44015879	0.385423
20	-0.11013432	9.08107760	-1.00013831		20.00000000	1.71700000	15.59221024	0.406818
21	-0.09997821	9.09513090	-0.90931490		21.00000000	1.63523810	14.87270453	0.428174
22	-0.09018082	9.08415130	-0.81921623		22.00000000	1.56090909	14.17953435	0.449637
23	-0.08000536	9.08976080	-0.72722961		23.00000000	1.49304348	13.57140808	0.471012
24	-0.07021765	9.09297470	-0.63848735		24.00000000	1.43083333	13.01053130	0.492385
25	-0.06001689	9.07185460	-0.54446449		25.00000000	1.37360000	12.46109948	0.513756
26	-0.04984961	9.08195020	-0.45273168		26.00000000	1.32076923	11.99516038	0.535243
27	-0.04006711	9.09938050	-0.36458592		27.00000000	1.27185185	11.57306394	0.556642
28	-0.02988198	9.07479860	-0.27117292		28.00000000	1.22642857	11.12959228	0.578028
29	-0.02010246	9.08906460	-0.18271254		29.00000000	1.18413793	10.76270615	0.599513
30	-0.00994783	9.09036450	-0.09042943		30.00000000	1.14466667	10.40543723	0.620907
31	-0.00064762	9.08241560	-0.00588191		31.00000000	1.10774194	10.06097264	0.642382
32	0.00947852	9.09153650	0.08617431		32.00000000	1.07312500	9.75635511	0.663770
33	0.01928083	9.08126740	0.17509439		33.00000000	1.04060606	9.45002189	0.685256
34	0.02944856	9.09270290	0.26776702		34.00000000	1.01000000	9.18362993	0.706628
35	0.03923748	9.08943650	0.35664656		35.00000000	0.98114286	8.91803570	0.727969
36	0.04938660	9.08502390	0.44867846		36.00000000	0.95388889	8.66610335	0.749377
37	0.05921273	9.08735560	0.53808712		37.00000000	0.92810811	8.43404841	0.770851
38	0.06938046	9.09087180	0.63072889		38.00000000	0.90368421	8.21527731	0.792222
39	0.07952884	9.09309480	0.72316326		39.00000000	0.88051282	8.00658655	0.813585
40	0.08933637	9.08375930	0.81151004		40.00000000	0.85850000	7.79840736	0.834952
41	0.09945869	9.09068200	0.90414736		41.00000000	0.83756098	7.61400048	0.856421
42	0.10924985	9.09029480	0.99311334		42.00000000	0.81761905	7.43239818	0.877809
43	0.11943990	9.08050160	1.08457420		43.00000000	0.79860465	7.25173081	0.899167
44	0.12924445	9.09838870	1.17591624		44.00000000	0.78045455	7.10087882	0.920541
45	0.13941664	9.08266640	1.26627483		45.00000000	0.76311111	6.93108365	0.942014
46	0.14921969	9.08894440	1.35624947		46.00000000	0.74652174	6.78509458	0.963393
47	0.15937552	9.07801150	1.44681280		47.00000000	0.73063830	6.63274287	0.984749
48	0.16952315	9.09394450	1.54163412		48.00000000	0.71541667	6.50595946	1.006125
49	0.17933664	9.07840730	1.62809106		49.00000000	0.70081633	6.36229605	1.027599
50	0.18950288	9.08970070	1.72252446		50.00000000	0.68680000	6.24280644	1.048986
51	0.19922853	9.08812330	1.81061345		51.00000000	0.67333333	6.11933636	1.070386
52	0.20940965	9.08292480	1.90205210		52.00000000	0.66038462	5.99822380	1.091743
53	0.21924770	9.08855250	1.99264423		53.00000000	0.64792453	5.88869609	1.113209
54	0.22939384	9.10606770	2.08887584		54.00000000	0.63592593	5.79078453	1.134585
55	0.23922592	9.06562140	2.16873162		55.00000000	0.62436364	5.66024434	1.155968
56	0.24936835	9.10618400	2.27079408		56.00000000	0.61321429	5.58404212	1.177326
57	0.25952417	9.06429480	2.35240358		57.00000000	0.60245614	5.46084006	1.198800
58	0.26932424	9.09453010	2.44937741		58.00000000	0.59206897	5.38458903	1.220184
59	0.27949199	9.07765770	2.53713262		59.00000000	0.58203390	5.28350450	1.241552
60	0.28932554	9.08660130	2.62898583		60.00000000	0.57233333	5.20056481	1.263050
61	0.29947692	9.08930020	2.72203563		61.00000000	0.56295082	5.11682900	1.284425
62	0.30926582	9.08158490	2.80862380		62.00000000	0.55387097	5.03002622	1.305777
63	0.31945589	9.08186340	2.90125476		63.00000000	0.54507937	4.95033634	1.327150
64	0.32926118	9.08570480	2.99156988		64.00000000	0.53656250	4.87504848	1.348632
65	0.33940807	9.08640580	3.08399946		65.00000000	0.52830769	4.80041808	1.370004
66	0.34924757	9.08114720	3.17156859		66.00000000	0.52030303	4.72494841	1.391356
67	0.35937139	9.08470730	3.26478389		67.00000000	0.51253731	4.65625147	1.412742
68	0.36955103	9.07450490	3.35349263		68.00000000	0.50500000	4.58262497	1.434366
69	0.37931541	9.07985210	3.44412782		69.00000000	0.49768116	4.51887132	1.455767
70	0.38947421	9.08125110	3.53691310		70.00000000	0.49057143	4.45500233	1.477140
71	0.39933753	9.08020970	3.62606851		71.00000000	0.48366197	4.39175213	1.498502
72	0.40945467	9.06872370	3.71323127		72.00000000	0.47694444	4.32527739	1.519975
73	0.41924506	9.07530980	3.80477880		73.00000000	0.47041096	4.26912519	1.541356
74	0.42938897	9.08191490	3.89967408		74.00000000	0.46405405	4.21449943	1.562703
75	0.43925679	9.07885460	3.98794853		75.00000000	0.45786667	4.15690489	1.584083
76	0.44940591	9.06432820	4.07356266		76.00000000	0.45184211	4.09564514	1.605566
77	0.45955652	9.07951350	4.17254963		77.00000000	0.44597403	4.04922719	1.626953
78	0.46937743	9.06623740	4.25548721		78.00000000	0.44025641	3.99146913	1.648313
79	0.47951615	9.03946500	4.33456945		79.00000000	0.43468354	3.92930668	1.669686
80	0.48935047	9.05978200	4.43340858		80.00000000	0.42925000	3.88891142	1.691158
81	0.49947280	9.02592660	4.50820483		81.00000000	0.42395062	3.82654715	1.712538
82	0.50930411	9.02216820	4.59502735		82.00000000	0.41878049	3.77830800	1.733895
83	0.51945323	8.99789910	4.67398775		83.00000000	0.41373494	3.72274524	1.755271
84	0.52920794	8.96012690	4.74177030		84.00000000	0.40880952	3.66298521	1.776748
85	0.53936601	8.91137310	4.80649175		85.00000000	0.40400000	3.60019473	1.798137
86	0.54952556	8.84500410	4.86055583		86.00000000	0.39930233	3.53183071	1.819530
87	0.55931371	8.74138450	4.88917620		87.00000000	0.39471264	3.45033499	1.840882
88	0.56944346	8.62817290	4.91325663		88.00000000	0.39022727	3.36694838	1.862365
89	0.57927704	8.43407730	4.88566733		89.00000000	0.38584270	3.25422713	1.883755
90	0.58940011	8.17158700	4.81633428		90.00000000	0.38155556	3.11791442	1.905140
91	0.59929609	7.83354330	4.69461187		91.00000000	0.37736264	2.95608656	1.926613
92	0.60938817	7.35243700	4.48048813		92.00000000	0.37326087	2.74437703	1.988326
93	0.61918104	6.74741510	4.17787150		93.00000000	0.36924731	2.49146489	2.009848
94	0.62933409	5.91930960	3.72522332		94.00000000	0.36531915	2.16243715	2.031237
95	0.63942838	4.87987090	3.12032794		95.00000000	0.36147368	1.76394491	2.052610
96	0.64919376	3.60515640	2.34044504		96.00000000	0.35770833	1.28959449	2.074027
97	0.65923148	1.97370730	1.30112998		97.00000000	0.35402062	0.69873308	2.095518
98	0.66904891	0.08353170	0.05588679		98.00000000	0.35040816	0.02927019	2.116878
99	0.67914915	-2.24433160	-1.52423590		99.00000000	0.34686869	-0.77848835	2.138237
100	0.68886536	-4.87707140	-3.35964555		100.00000000	0.34340000	-1.67478632	2.159610
101	0.69906831	-8.05443950	-5.63060341		101.00000000	0.34000000	-2.73850943	2.181082
08:08 04/04/2018
Test Lot:	JK-PERC
Recipe:	Recipe_YJX-LID
Cell Name:	3-16-11h
Test Order:	4
Test Condition:	Light
1	-0.29994571	9.09609890	-2.72833584		1.00000000	34.34000000	312.36003623	0.000000
2	-0.29014149	9.08594610	-2.63620994		2.00000000	17.17000000	156.00569454	0.061797
3	-0.28001350	9.08645820	-2.54433096		3.00000000	11.44666667	104.00965820	0.083221
4	-0.27017802	9.10658840	-2.46040002		4.00000000	8.58500000	78.18006141	0.104711
5	-0.26002845	9.08313850	-2.36187443		5.00000000	6.86800000	62.38299522	0.126093
6	-0.24986027	9.09448530	-2.27235055		6.00000000	5.72333333	52.05077087	0.147449
7	-0.24003892	9.09761810	-2.18378242		7.00000000	4.90571429	44.63031508	0.168821
8	-0.22989158	9.09628110	-2.09115843		8.00000000	4.29250000	39.04578662	0.190287
9	-0.22007172	9.08383460	-1.99909510		9.00000000	3.81555556	34.65987557	0.211709
10	-0.20992886	9.10037140	-1.91043059		10.00000000	3.43400000	31.25067539	0.233118
11	-0.20008071	9.07986070	-1.81670498		11.00000000	3.12181818	28.34567422	0.254480
12	-0.18998696	9.10712530	-1.73023505		12.00000000	2.86166667	26.06155690	0.275956
13	-0.18018869	9.08560850	-1.63712389		13.00000000	2.64153846	23.99998430	0.297325
14	-0.17004135	9.09355260	-1.54627996		14.00000000	2.45285714	22.30518545	0.318713
15	-0.16022074	9.07680030	-1.45429166		15.00000000	2.28933333	20.77982149	0.340062
16	-0.15008382	9.08371260	-1.36331829		16.00000000	2.14625000	19.49591817	0.361540
17	-0.13993500	9.09000780	-1.27201024		17.00000000	2.02000000	18.36181576	0.382920
18	-0.13009207	9.08469390	-1.18184663		18.00000000	1.90777778	17.33157714	0.404305
19	-0.11994920	9.08655360	-1.08992484		19.00000000	1.80736842	16.42275003	0.425782
20	-0.11013529	9.09068680	-1.00120543		20.00000000	1.71700000	15.60870924	0.447168
21	-0.09998275	9.07734300	-0.90757768		21.00000000	1.63523810	14.84361708	0.468520
22	-0.09016363	9.10003760	-0.82049245		22.00000000	1.56090909	14.20433142	0.489894
23	-0.08001109	9.08398150	-0.72681922		23.00000000	1.49304348	13.56277934	0.511373
24	-0.07020313	9.09398650	-0.63842634		24.00000000	1.43083333	13.01197902	0.532755
25	-0.06004687	9.08712390	-0.54565332		25.00000000	1.37360000	12.48207339	0.554106
26	-0.04988464	9.10112290	-0.45400627		26.00000000	1.32076923	12.02048309	0.575484
27	-0.04008190	9.07496930	-0.36374204		27.00000000	1.27185185	11.54201651	0.596965
28	-0.02991075	9.09114460	-0.27192296		28.00000000	1.22642857	11.14963948	0.618337
29	-0.02009908	9.09322740	-0.18276548		29.00000000	1.18413793	10.76763548	0.639684
30	-0.00994728	9.08678820	-0.09038879		30.00000000	1.14466667	10.40134356	0.661062
31	-0.00064022	9.08127120	-0.00581398		31.00000000	1.10774194	10.05970494	0.682656
32	0.00949426	9.09500790	0.08635037		32.00000000	1.07312500	9.76008035	0.704036
33	0.01931310	9.08606620	0.17548006		33.00000000	1.04060606	9.45501555	0.725376
34	0.02942963	9.08514120	0.26737233		34.00000000	1.01000000	9.17599261	0.746756
35	0.03928121	9.08576390	0.35689982		35.00000000	0.98114286	8.91443235	0.768227
36	0.04940593	9.08709910	0.44895660		36.00000000	0.95388889	8.66808286	0.789616
37	0.05925007	9.08749770	0.53843489		37.00000000	0.92810811	8.43418030	0.810953
38	0.06938000	9.08605580	0.63039055		38.00000000	0.90368421	8.21092516	0.832314
39	0.07952556	9.08899780	0.72280764		39.00000000	0.88051282	8.00297909	0.853781
40	0.08934663	9.08802030	0.81198394		40.00000000	0.85850000	7.80206543	0.875152
41	0.09947358	9.08151820	0.90337114		41.00000000	0.83756098	7.60632524	0.896526
42	0.10929316	9.09390160	0.99390124		42.00000000	0.81761905	7.43534717	0.917895
43	0.11947147	9.08698180	1.08563507		43.00000000	0.79860465	7.25690593	0.939366
44	0.12927839	9.08194350	1.17409903		44.00000000	0.78045455	7.08804409	0.960745
45	0.13941056	9.08845710	1.26702689		45.00000000	0.76311111	6.93550260	0.982131
46	0.14925767	9.08594890	1.35614756		46.00000000	0.74652174	6.78285837	1.003473
47	0.15941067	9.09031960	1.44909394		47.00000000	0.73063830	6.64173564	1.024941
48	0.16954581	9.09600070	1.54218881		48.00000000	0.71541667	6.50743050	1.046328
49	0.17935275	9.07782840	1.62813349		49.00000000	0.70081633	6.36189035	1.067707
50	0.18949458	9.09500600	1.72345434		50.00000000	0.68680000	6.24645012	1.089190
51	0.19928439	9.09207060	1.81190774		51.00000000	0.67333333	6.12199420	1.110574
52	0.20940390	9.07954030	1.90129115		52.00000000	0.66038462	5.99598873	1.131908
53	0.21926589	9.08784010	1.99265335		53.00000000	0.64792453	5.88823451	1.153288
54	0.22936308	9.09385780	2.08579523		54.00000000	0.63592593	5.78301994	1.174760
55	0.23924145	9.08051870	2.17243646		55.00000000	0.62436364	5.66954568	1.196139
56	0.24936096	9.09359740	2.26758818		56.00000000	0.61321429	5.57632383	1.217501
57	0.25950578	9.07783990	2.35575192		57.00000000	0.60245614	5.46900039	1.238868
58	0.26931569	9.08920860	2.44786649		58.00000000	0.59206897	5.38143833	1.260344
59	0.27946123	9.08441540	2.53874190		59.00000000	0.58203390	5.28743771	1.281738
60	0.28930390	9.09064200	2.62995818		60.00000000	0.57233333	5.20287744	1.303086
61	0.29947996	9.08351900	2.72033191		61.00000000	0.56295082	5.11357447	1.324460
62	0.30928317	9.08378600	2.80946213		62.00000000	0.55387097	5.03124534	1.345932
63	0.31943321	9.10022160	2.90691300		63.00000000	0.54507937	4.96034301	1.367300
64	0.32926396	9.07599070	2.98839664		64.00000000	0.53656250	4.86983626	1.388654
65	0.33940205	9.07507800	3.08010008		65.00000000	0.52830769	4.79443352	1.410027
66	0.34923056	9.10504630	3.17976042		66.00000000	0.52030303	4.73738318	1.431503
67	0.35939547	9.07689860	3.26219624		67.00000000	0.51253731	4.65224922	1.452887
68	0.36953360	9.07171820	3.35230468		68.00000000	0.50500000	4.58121769	1.474231
69	0.37934053	9.08046820	3.44458962		69.00000000	0.49768116	4.51917794	1.495607
70	0.38950691	9.08284850	3.53783225		70.00000000	0.49057143	4.45578596	1.517065
71	0.39929748	9.09158330	3.63024630		71.00000000	0.48366197	4.39725311	1.538450
72	0.40947503	9.08104230	3.71846007		72.00000000	0.47694444	4.33115267	1.559811
73	0.41925889	9.07248780	3.80372116		73.00000000	0.47041096	4.26779769	1.581171
74	0.42944390	9.07029630	3.89518342		74.00000000	0.46405405	4.20910777	1.602644
75	0.43924636	9.07685570	3.98697583		75.00000000	0.45786667	4.15598966	1.624009
76	0.44944328	9.07173160	4.07722881		76.00000000	0.45184211	4.09899030	1.645402
77	0.45955905	9.06682680	4.16674231		77.00000000	0.44597403	4.04356925	1.666738
78	0.46941435	9.06749150	4.25641063		78.00000000	0.44025641	3.99202126	1.688204
79	0.47951823	9.05393790	4.34152828		79.00000000	0.43468354	3.93559782	1.709592
80	0.48937279	9.04990290	4.42877623		80.00000000	0.42925000	3.88467082	1.730964
81	0.49947593	9.04337880	4.51695004		81.00000000	0.42395062	3.83394602	1.752448
82	0.50928956	9.01583770	4.59167202		82.00000000	0.41878049	3.77565691	1.773824
83	0.51946789	8.99805550	4.67420090		83.00000000	0.41373494	3.72280995	1.795171
84	0.52921897	8.95657730	4.73999061		84.00000000	0.40880952	3.66153410	1.816556
85	0.53938240	8.90385720	4.80258387		85.00000000	0.40400000	3.59715831	1.838034
86	0.54953170	8.84212300	4.85902688		86.00000000	0.39930233	3.53068028	1.859409
87	0.55932742	8.75187300	4.89516255		87.00000000	0.39471264	3.45447493	1.880765
88	0.56948340	8.61755940	4.90755703		88.00000000	0.39022727	3.36280670	1.902137
89	0.57926059	8.43486690	4.88598598		89.00000000	0.38584270	3.25453179	1.923623
90	0.58937263	8.16564080	4.81260519		90.00000000	0.38155556	3.11564561	1.944999
91	0.59921902	7.82252600	4.68740636		91.00000000	0.37736264	2.95192904	1.966345
92	0.60934001	7.35457900	4.48143924		92.00000000	0.37326087	2.74517655	1.987822
93	0.61912161	6.74175980	4.17396918		93.00000000	0.36924731	2.48937668	2.009321
94	0.62923521	5.91626170	3.72272017		94.00000000	0.36531915	2.16132369	2.030710
95	0.63935322	4.87148140	3.11459732		95.00000000	0.36147368	1.76091233	2.052075
96	0.64913332	3.59780650	2.33545608		96.00000000	0.35770833	1.28696537	2.073448
97	0.65916800	1.96228130	1.29347304		97.00000000	0.35402062	0.69468804	2.094930
98	0.66893774	0.07798114	0.05216453		98.00000000	0.35040816	0.02732523	2.116312
99	0.67909968	-2.24894570	-1.52725831		99.00000000	0.34686869	-0.78008884	2.137657
100	0.68882322	-4.86645170	-3.35212493		100.00000000	0.34340000	-1.67113951	2.159025
101	0.69897699	-8.02869030	-5.61186978		101.00000000	0.34000000	-2.72975470	2.180495
