# Supplementary material for: Study on the Electrical Injection Regeneration of Industrialized B-Doped Czochralski Silicon PERC Solar Cells
Source: Hindawi journal article supplement (doi:10.1155/2019/5357370), 2019-06-20
Supplement: f1 [file 5357370.f1.zip › section3.3/IVRawData_3-16-12h.csv]

09:09 04/04/2018
Test Lot:	JK-PERC
Recipe:	Recipe_YJX-LID
Cell Name:	3-16-12h
Test Order:	2
Test Condition:	Light
1	-0.29997909	9.08534720	-2.72541419		1.00000000	34.34000000	311.99082285	0.000000
2	-0.29017499	9.08692460	-2.63679825		2.00000000	17.17000000	156.02249538	0.061751
3	-0.28004342	9.07959940	-2.54268207		3.00000000	11.44666667	103.93114780	0.083213
4	-0.27019688	9.07397840	-2.45176065		4.00000000	8.58500000	77.90010456	0.104668
5	-0.26005265	9.09660530	-2.36559631		5.00000000	6.86800000	62.47548520	0.126031
6	-0.24991363	9.07792380	-2.26869689		6.00000000	5.72333333	51.95598388	0.147404
7	-0.24010581	9.09010030	-2.18258590		7.00000000	4.90571429	44.59343490	0.168964
8	-0.22992437	9.06977270	-2.08536177		8.00000000	4.29250000	38.93199931	0.190368
9	-0.22008677	9.08192730	-1.99881204		9.00000000	3.81555556	34.65259816	0.211786
10	-0.20995817	9.08844470	-1.90819322		10.00000000	3.43400000	31.20971910	0.233178
11	-0.20013247	9.07265470	-1.81573279		11.00000000	3.12181818	28.32317840	0.254656
12	-0.18999569	9.07264330	-1.72376312		12.00000000	2.86166667	25.96288091	0.276028
13	-0.18020722	9.08477500	-1.63714205		13.00000000	2.64153846	23.99778258	0.297386
14	-0.17006001	9.07980820	-1.54411227		14.00000000	2.45285714	22.27147240	0.318760
15	-0.16024028	9.07417010	-1.45404756		15.00000000	2.28933333	20.77380008	0.340240
16	-0.15010199	9.08107950	-1.36308810		16.00000000	2.14625000	19.49026688	0.361616
17	-0.13995405	9.07647990	-1.27029012		17.00000000	2.02000000	18.33448940	0.382954
18	-0.13014175	9.08713440	-1.18261557		18.00000000	1.90777778	17.33623307	0.404327
19	-0.11998710	9.08092780	-1.08959419		19.00000000	1.80736842	16.41258214	0.425822
20	-0.11018820	9.08650400	-1.00122552		20.00000000	1.71700000	15.60152737	0.447196
21	-0.10004471	9.08357620	-0.90876375		21.00000000	1.63523810	14.85380984	0.468545
22	-0.09020712	9.08193400	-0.81925513		22.00000000	1.56090909	14.17607334	0.489923
23	-0.08007480	9.07982830	-0.72706539		23.00000000	1.49304348	13.55657843	0.511399
24	-0.07021785	9.07107260	-0.63695120		24.00000000	1.43083333	12.97919305	0.532791
25	-0.06006915	9.08070950	-0.54547051		25.00000000	1.37360000	12.47326257	0.554130
26	-0.04994725	9.07478810	-0.45326068		26.00000000	1.32076923	11.98570090	0.575501
27	-0.04011263	9.07732770	-0.36411545		27.00000000	1.27185185	11.54501605	0.596996
28	-0.02995723	9.07323740	-0.27180907		28.00000000	1.22642857	11.12767758	0.618370
29	-0.02013750	9.08517550	-0.18295269		29.00000000	1.18413793	10.75810092	0.639725
30	-0.00998880	9.07489300	-0.09064729		30.00000000	1.14466667	10.38772752	0.661089
31	-0.00070270	9.08577250	-0.00638455		31.00000000	1.10774194	10.06469121	0.682686
32	0.00945026	9.07985970	0.08580701		32.00000000	1.07312500	9.74382444	0.704076
33	0.01927418	9.08449080	0.17509610		33.00000000	1.04060606	9.45337618	0.725463
34	0.02941738	9.06371780	0.26663080		34.00000000	1.01000000	9.15435498	0.746805
35	0.03923683	9.09016990	0.35666947		35.00000000	0.98114286	8.91875527	0.768272
36	0.04938598	9.06064030	0.44746863		36.00000000	0.95388889	8.64284411	0.789637
37	0.05918832	9.08229450	0.53756576		37.00000000	0.92810811	8.42935117	0.811015
38	0.06936352	9.07864000	0.62972643		38.00000000	0.90368421	8.20422362	0.832436
39	0.07952011	9.08232980	0.72222790		39.00000000	0.88051282	7.99710783	0.853912
40	0.08932543	9.06788060	0.80999232		40.00000000	0.85850000	7.78477550	0.875284
41	0.09946937	9.08198070	0.90337891		41.00000000	0.83756098	7.60671262	0.896650
42	0.10929106	9.08010670	0.99237449		42.00000000	0.81761905	7.42406819	0.918020
43	0.11943872	9.08640860	1.08526901		43.00000000	0.79860465	7.25644817	0.939500
44	0.12925966	9.07612990	1.17317746		44.00000000	0.78045455	7.08350684	0.960887
45	0.13941105	9.07663350	1.26538301		45.00000000	0.76311111	6.92647988	0.982244
46	0.14919627	9.08389850	1.35528377		46.00000000	0.74652174	6.78132771	1.003611
47	0.15934765	9.07254790	1.44568919		47.00000000	0.73063830	6.62875096	1.025088
48	0.16947746	9.09918590	1.54210691		48.00000000	0.71541667	6.50970925	1.046462
49	0.17930882	9.07692910	1.62757345		49.00000000	0.70081633	6.36126011	1.067856
50	0.18945277	9.08832450	1.72180825		50.00000000	0.68680000	6.24186127	1.089206
51	0.19926924	9.08716960	1.81079338		51.00000000	0.67333333	6.11869420	1.110672
52	0.20939012	9.07091900	1.89936082		52.00000000	0.66038462	5.99029536	1.132054
53	0.21921998	9.08136180	1.99081595		53.00000000	0.64792453	5.88403706	1.153429
54	0.22936617	9.07469080	2.08142707		54.00000000	0.63592593	5.77083115	1.174911
55	0.23919678	9.07592580	2.17093223		55.00000000	0.62436364	5.66667804	1.196301
56	0.24934593	9.07505130	2.26282711		56.00000000	0.61321429	5.56495110	1.217656
57	0.25949210	9.07080550	2.35380237		57.00000000	0.60245614	5.46476247	1.239036
58	0.26932943	9.06993290	2.44279986		58.00000000	0.59206897	5.37002579	1.260510
59	0.27947038	9.08123680	2.53793670		59.00000000	0.58203390	5.28558766	1.281885
60	0.28928167	9.08178230	2.62719315		60.00000000	0.57233333	5.19780674	1.303243
61	0.29943529	9.07791520	2.71824817		61.00000000	0.56295082	5.11041980	1.324626
62	0.30924580	9.07786180	2.80729063		62.00000000	0.55387097	5.02796410	1.346101
63	0.31940240	9.07918550	2.89991364		63.00000000	0.54507937	4.94887667	1.367490
64	0.32923004	9.07598590	2.98808720		64.00000000	0.53656250	4.86983368	1.388838
65	0.33937770	9.07588100	3.08015162		65.00000000	0.52830769	4.79485775	1.410209
66	0.34919119	9.06339070	3.16485618		66.00000000	0.52030303	4.71570965	1.431698
67	0.35936490	9.09270860	3.26760032		67.00000000	0.51253731	4.66035244	1.453075
68	0.36950588	9.07187370	3.35211067		68.00000000	0.50500000	4.58129622	1.474414
69	0.37932160	9.07221790	3.44128821		69.00000000	0.49768116	4.51507192	1.495796
70	0.38947523	9.07279210	3.53362779		70.00000000	0.49057143	4.45085258	1.517281
71	0.39928800	9.07398990	3.62313528		71.00000000	0.48366197	4.38874385	1.538659
72	0.40944457	9.06495950	3.71159844		72.00000000	0.47694444	4.32348207	1.560006
73	0.41926256	9.07272150	3.80385244		73.00000000	0.47041096	4.26790762	1.581376
74	0.42940351	9.06921860	3.89435430		74.00000000	0.46405405	4.20860766	1.602844
75	0.43922445	9.05838110	3.97866246		75.00000000	0.45786667	4.14753076	1.624214
76	0.44937211	9.06466770	4.07340885		76.00000000	0.45184211	4.09579854	1.645576
77	0.45952722	9.05551340	4.16125490		77.00000000	0.44597403	4.03852377	1.666949
78	0.46939579	9.04706570	4.24665455		78.00000000	0.44025641	3.98302867	1.688434
79	0.47950700	9.05299190	4.34097299		79.00000000	0.43468354	3.93518661	1.709822
80	0.48934430	9.04174710	4.42452741		80.00000000	0.42925000	3.88116994	1.731208
81	0.49945924	9.02549840	4.50786857		81.00000000	0.42395062	3.82636562	1.752556
82	0.50926602	9.01055810	4.58877106		82.00000000	0.41878049	3.77344592	1.774022
83	0.51941073	8.98590370	4.66737480		83.00000000	0.41373494	3.71778233	1.795413
84	0.52920336	8.95291610	4.73791328		84.00000000	0.40880952	3.66003737	1.816796
85	0.53934211	8.90006350	4.80017903		85.00000000	0.40400000	3.59562565	1.838268
86	0.54948831	8.83182140	4.85298262		86.00000000	0.39930233	3.52656682	1.859644
87	0.55931222	8.73563390	4.88594679		87.00000000	0.39471264	3.44806515	1.880995
88	0.56944054	8.59628870	4.89507528		88.00000000	0.39022727	3.35450629	1.902369
89	0.57924062	8.41820430	4.87616588		89.00000000	0.38584270	3.24810265	1.923865
90	0.58937413	8.13922310	4.79704753		90.00000000	0.38155556	3.10556579	1.945239
91	0.59916759	7.79212380	4.66878804		91.00000000	0.37736264	2.94045639	1.966611
92	0.60928994	7.31673530	4.45801321		92.00000000	0.37326087	2.73105098	1.988085
93	0.61907887	6.70214650	4.14915728		93.00000000	0.36924731	2.47474958	2.009587
94	0.62917739	5.87720870	3.69780683		94.00000000	0.36531915	2.14705688	2.030977
95	0.63932431	4.82537080	3.08497686		95.00000000	0.36147368	1.74424456	2.052319
96	0.64915496	3.55163860	2.30556381		96.00000000	0.35770833	1.27045072	2.073684
97	0.65916640	1.95744170	1.29027980		97.00000000	0.35402062	0.69297472	2.095164
98	0.66895682	0.08745501	0.05850363		98.00000000	0.35040816	0.03064495	2.116548
99	0.67904794	-2.18266960	-1.48213730		99.00000000	0.34686869	-0.75709974	2.137885
100	0.68877065	-4.73023080	-3.25804414		100.00000000	0.34340000	-1.62436126	2.159258
101	0.69898307	-7.79765840	-5.45043121		101.00000000	0.34000000	-2.65120386	2.180792
09:09 04/04/2018
Test Lot:	JK-PERC
Recipe:	Recipe_YJX-LID
Cell Name:	3-16-12h
Test Order:	3
Test Condition:	Light
1	-0.30006617	9.07123470	-2.72197065		1.00000000	34.34000000	311.50619960	0.000000
2	-0.29020774	9.08572580	-2.63674795		2.00000000	17.17000000	156.00191199	0.021587
3	-0.28003001	9.06051540	-2.53721622		3.00000000	11.44666667	103.71269961	0.042967
4	-0.27026090	9.08771900	-2.45605512		4.00000000	8.58500000	78.01806762	0.064378
5	-0.26010475	9.07580090	-2.36065892		5.00000000	6.86800000	62.33260058	0.085771
6	-0.24994490	9.08002660	-2.26950634		6.00000000	5.72333333	51.96801891	0.107270
7	-0.24010581	9.08076100	-2.18034348		7.00000000	4.90571429	44.54761896	0.128636
8	-0.22998466	9.07101630	-2.08619460		8.00000000	4.29250000	38.93733747	0.149994
9	-0.22013366	9.07772830	-1.99831356		9.00000000	3.81555556	34.63657665	0.171367
10	-0.21000730	9.08562280	-1.90804711		10.00000000	3.43400000	31.20002870	0.192842
11	-0.20017564	9.07493780	-1.81658148		11.00000000	3.12181818	28.33030582	0.214242
12	-0.19000314	9.07342620	-1.72397947		12.00000000	2.86166667	25.96512131	0.235585
13	-0.18025336	9.07525540	-1.63584528		13.00000000	2.64153846	23.97263619	0.256955
14	-0.17010690	9.08554270	-1.54551350		14.00000000	2.45285714	22.28553831	0.278441
15	-0.16025887	9.07359790	-1.45412455		15.00000000	2.28933333	20.77249013	0.299819
16	-0.15008859	9.08404730	-1.36341185		16.00000000	2.14625000	19.49663652	0.321196
17	-0.13996893	9.08834930	-1.27208653		17.00000000	2.02000000	18.35846559	0.342568
18	-0.13014026	9.06513500	-1.17973903		18.00000000	1.90777778	17.29426311	0.364033
19	-0.11998859	9.09376810	-1.09114841		19.00000000	1.80736842	16.43578929	0.385422
20	-0.11020830	9.08605000	-1.00135812		20.00000000	1.71700000	15.60074785	0.406802
21	-0.10001346	9.07626630	-0.90774880		21.00000000	1.63523810	14.84185642	0.428140
22	-0.09020489	9.07347770	-0.81847203		22.00000000	1.56090909	14.16287383	0.449614
23	-0.08005396	9.08907510	-0.72761641		23.00000000	1.49304348	13.57038430	0.470994
24	-0.07022380	9.08167550	-0.63774977		24.00000000	1.43083333	12.99436403	0.492370
25	-0.06007808	9.08113670	-0.54557727		25.00000000	1.37360000	12.47384937	0.513851
26	-0.04993832	9.07078930	-0.45297995		26.00000000	1.32076923	11.98041941	0.535233
27	-0.04013049	9.09810730	-0.36511149		27.00000000	1.27185185	11.57144462	0.556616
28	-0.03000487	9.05519490	-0.27169990		28.00000000	1.22642857	11.10554975	0.577999
29	-0.02017918	9.09006500	-0.18343001		29.00000000	1.18413793	10.76389076	0.599482
30	-0.01002304	9.06835270	-0.09089243		30.00000000	1.14466667	10.38024106	0.620871
31	-0.00071461	9.07835100	-0.00648744		31.00000000	1.10774194	10.05647011	0.642330
32	0.00941007	9.06938270	0.08534352		32.00000000	1.07312500	9.73258131	0.663693
33	0.01923250	9.08806230	0.17478618		33.00000000	1.04060606	9.45709271	0.685166
34	0.02938165	9.08037190	0.26679634		34.00000000	1.01000000	9.17117562	0.706532
35	0.03921823	9.06564710	0.35553859		35.00000000	0.98114286	8.89469490	0.727883
36	0.04936068	9.07628630	0.44801167		36.00000000	0.95388889	8.65776865	0.749269
37	0.05917790	9.08289240	0.53750652		37.00000000	0.92810811	8.42990608	0.770744
38	0.06933301	9.07350640	0.62909350		38.00000000	0.90368421	8.19958447	0.792117
39	0.07947993	9.07413390	0.72121148		39.00000000	0.88051282	7.98989123	0.813480
40	0.08930831	9.08464810	0.81133461		40.00000000	0.85850000	7.79917039	0.834859
41	0.09945226	9.08227830	0.90325308		41.00000000	0.83756098	7.60696187	0.856335
42	0.10924492	9.08584310	0.99258220		42.00000000	0.81761905	7.42875838	0.877707
43	0.11939630	9.07479290	1.08349670		43.00000000	0.79860465	7.24717182	0.899050
44	0.12921502	9.08167080	1.17348827		44.00000000	0.78045455	7.08783126	0.920435
45	0.13940063	9.07477760	1.26502971		45.00000000	0.76311111	6.92506362	0.941910
46	0.14921637	9.08331110	1.35537871		46.00000000	0.74652174	6.78088920	0.963319
47	0.15937594	9.05671220	1.44342202		47.00000000	0.73063830	6.61718079	0.984715
48	0.16950946	9.08509350	1.54000929		48.00000000	0.71541667	6.49962731	1.006095
49	0.17931776	9.08543870	1.62918052		49.00000000	0.70081633	6.36722377	1.027567
50	0.18947434	9.08035180	1.72049366		50.00000000	0.68680000	6.23638562	1.048956
51	0.19924319	9.06917190	1.80697074		51.00000000	0.67333333	6.10657575	1.070336
52	0.20939086	9.08767700	1.90287650		52.00000000	0.66038462	6.00136208	1.091698
53	0.21924232	9.07459930	1.98953620		53.00000000	0.64792453	5.87965547	1.113185
54	0.22938924	9.08149340	2.08319687		54.00000000	0.63592593	5.77515710	1.134560
55	0.23921762	9.06760500	2.16913089		55.00000000	0.62436364	5.66148283	1.155942
56	0.24935487	9.07896330	2.26388371		56.00000000	0.61321429	5.56735000	1.177420
57	0.25949880	9.07614800	2.35524951		57.00000000	0.60245614	5.46798109	1.198868
58	0.26932496	9.07336900	2.44368474		58.00000000	0.59206897	5.37206020	1.220257
59	0.27947336	9.07511520	2.53625294		59.00000000	0.58203390	5.28202468	1.241633
60	0.28930026	9.08539200	2.62840627		60.00000000	0.57233333	5.19987269	1.262973
61	0.29942933	9.07054520	2.71598727		61.00000000	0.56295082	5.10627086	1.284456
62	0.30925101	9.08485320	2.80950003		62.00000000	0.55387097	5.03183643	1.305834
63	0.31939718	9.07323070	2.89796430		63.00000000	0.54507937	4.94563083	1.327230
64	0.32920101	9.07449440	2.98733272		64.00000000	0.53656250	4.86903340	1.348600
65	0.33936355	9.06968590	3.07792080		65.00000000	0.52830769	4.79158483	1.370069
66	0.34918600	9.07538890	3.16899875		66.00000000	0.52030303	4.72195235	1.391443
67	0.35932547	9.07832240	3.26207246		67.00000000	0.51253731	4.65297897	1.412834
68	0.36947685	9.07216450	3.35195476		68.00000000	0.50500000	4.58144307	1.434184
69	0.37931341	9.07653330	3.44285080		69.00000000	0.49768116	4.51721962	1.455654
70	0.38946554	9.06201740	3.52934350		70.00000000	0.49057143	4.44556682	1.477026
71	0.39929914	9.06745620	3.62062746		71.00000000	0.48366197	4.38558375	1.498447
72	0.40942970	9.07688430	3.71634602		72.00000000	0.47694444	4.32916954	1.519941
73	0.41926330	9.06143190	3.79912584		73.00000000	0.47041096	4.26259687	1.541315
74	0.42938566	9.06954770	3.89433373		74.00000000	0.46405405	4.20876038	1.562667
75	0.43920660	9.05880830	3.97868839		75.00000000	0.45786667	4.14772636	1.584044
76	0.44937062	9.07248310	4.07690736		76.00000000	0.45184211	4.09932986	1.605527
77	0.45951012	9.05820080	4.16233494		77.00000000	0.44597403	4.03972228	1.626906
78	0.46936825	9.05813690	4.25160187		78.00000000	0.44025641	3.98790284	1.648263
79	0.47951591	9.04302880	4.33627618		79.00000000	0.43468354	3.93085581	1.669639
80	0.48933390	9.03974440	4.42345338		80.00000000	0.42925000	3.88031028	1.691114
81	0.49946445	9.02019310	4.50526579		81.00000000	0.42395062	3.82411643	1.712502
82	0.50928688	9.00282960	4.58502300		82.00000000	0.41878049	3.77020937	1.733850
83	0.51944047	8.99617390	4.67297680		83.00000000	0.41373494	3.72203147	1.755276
84	0.52921230	8.95415120	4.73864695		84.00000000	0.40880952	3.66054229	1.776751
85	0.53932798	8.90511990	4.80278033		85.00000000	0.40400000	3.59766844	1.798127
86	0.54948682	8.85066510	4.86332382		86.00000000	0.39930233	3.53409116	1.819489
87	0.55931741	8.74301240	4.89011905		87.00000000	0.39471264	3.45097754	1.840865
88	0.56944722	8.60895920	4.90234788		88.00000000	0.39022727	3.35945067	1.862356
89	0.57926816	8.41770550	4.87610878		89.00000000	0.38584270	3.24791019	1.883753
90	0.58938009	8.17662140	4.81913786		90.00000000	0.38155556	3.11983532	1.905107
91	0.59919804	7.82091050	4.68627424		91.00000000	0.37736264	2.95131941	1.926478
92	0.60929811	7.34803820	4.47714579		92.00000000	0.37326087	2.74273513	1.947948
93	0.61910266	6.74404190	4.17525428		93.00000000	0.36924731	2.49021934	1.969335
94	0.62921906	5.93723580	3.73582193		94.00000000	0.36531915	2.16898593	1.990854
95	0.63932431	4.86864570	3.11264355		95.00000000	0.36147368	1.75988730	2.012256
96	0.64910436	3.60379000	2.33923580		96.00000000	0.35770833	1.28910571	2.033740
97	0.65914333	1.97022590	1.29866126		97.00000000	0.35402062	0.69750059	2.055114
98	0.66895312	0.06683112	0.04470689		98.00000000	0.35040816	0.02341817	2.076554
99	0.67905241	-2.26849820	-1.54042917		99.00000000	0.34686869	-0.78687099	2.097931
100	0.68874532	-4.92602440	-3.39277625		100.00000000	0.34340000	-1.69159678	2.119414
101	0.69898456	-8.11519150	-5.67239356		101.00000000	0.34000000	-2.75916511	2.140771
09:09 04/04/2018
Test Lot:	JK-PERC
Recipe:	Recipe_YJX-LID
Cell Name:	3-16-12h
Test Order:	4
Test Condition:	Light
1	-0.30001554	9.09932140	-2.72993782		1.00000000	34.34000000	312.47069688	0.000000
2	-0.29016325	9.08048250	-2.63482231		2.00000000	17.17000000	155.91188453	0.061788
3	-0.28001103	9.08460520	-2.54378966		3.00000000	11.44666667	103.98844752	0.083203
4	-0.27018479	9.08724210	-2.45523460		4.00000000	8.58500000	78.01397343	0.104714
5	-0.26006383	9.08224870	-2.36196438		5.00000000	6.86800000	62.37688407	0.126097
6	-0.24986696	9.08137420	-2.26913536		6.00000000	5.72333333	51.97573167	0.147464
7	-0.24007718	9.07920070	-2.17970890		7.00000000	4.90571429	44.53996458	0.168844
8	-0.22992274	9.07975480	-2.08764210		8.00000000	4.29250000	38.97484748	0.190324
9	-0.22006822	9.07249160	-1.99656708		9.00000000	3.81555556	34.61659573	0.211714
10	-0.20993535	9.09801480	-1.90999492		10.00000000	3.43400000	31.24258282	0.233113
11	-0.20013814	9.07878880	-1.81701190		11.00000000	3.12181818	28.34232794	0.254504
12	-0.18996434	9.08244710	-1.72534107		12.00000000	2.86166667	25.99093612	0.275995
13	-0.18016861	9.07393740	-1.63483869		13.00000000	2.64153846	23.96915464	0.297371
14	-0.17005882	9.07893090	-1.54395228		14.00000000	2.45285714	22.26932051	0.318714
15	-0.16024598	9.07940290	-1.45493782		15.00000000	2.28933333	20.78577971	0.340100
16	-0.15007962	9.06635670	-1.36067537		16.00000000	2.14625000	19.45866807	0.361579
17	-0.13991773	9.10005950	-1.27325967		17.00000000	2.02000000	18.38212019	0.382959
18	-0.13010190	9.06880860	-1.17986923		18.00000000	1.90777778	17.30127152	0.404314
19	-0.11998542	9.09116080	-1.09080675		19.00000000	1.80736842	16.43107694	0.425689
20	-0.11019342	9.08120730	-1.00068929		20.00000000	1.71700000	15.59243293	0.447160
21	-0.09999207	9.08198830	-0.90812685		21.00000000	1.63523810	14.85121325	0.468542
22	-0.09017626	9.06962780	-0.81786513		22.00000000	1.56090909	14.15686448	0.489886
23	-0.08004934	9.08536620	-0.72727760		23.00000000	1.49304348	13.56484675	0.511262
24	-0.07022236	9.07278250	-0.63711223		24.00000000	1.43083333	12.98163963	0.532739
25	-0.06004559	9.08169940	-0.54531599		25.00000000	1.37360000	12.47462230	0.554114
26	-0.04991495	9.07509900	-0.45298313		26.00000000	1.32076923	11.98611153	0.575488
27	-0.04010881	9.08625410	-0.36443885		27.00000000	1.27185185	11.55636910	0.596852
28	-0.02996776	9.08335020	-0.27220763		28.00000000	1.22642857	11.14008021	0.618326
29	-0.02013036	9.08516880	-0.18288767		29.00000000	1.18413793	10.75809299	0.639726
30	-0.01001982	9.08021070	-0.09098204		30.00000000	1.14466667	10.39381451	0.661104
31	-0.00069520	9.07257180	-0.00630723		31.00000000	1.10774194	10.05006825	0.682582
32	0.00943746	9.06929780	0.08559116		32.00000000	1.07312500	9.73249020	0.704060
33	0.01924333	9.08655260	0.17485549		33.00000000	1.04060606	9.45552171	0.725436
34	0.02940567	9.07254220	0.26678420		34.00000000	1.01000000	9.16326762	0.746822
35	0.03925173	9.07911590	0.35637097		35.00000000	0.98114286	8.90790971	0.768312
36	0.04939695	9.07243540	0.44815067		36.00000000	0.95388889	8.65409532	0.789694
37	0.05921101	9.08767890	0.53809060		37.00000000	0.92810811	8.43434847	0.811054
38	0.06935028	9.06658080	0.62876992		38.00000000	0.90368421	8.19332591	0.832431
39	0.07950742	9.07807920	0.72177464		39.00000000	0.88051282	7.99336512	0.853901
40	0.08932073	9.08008580	0.81103986		40.00000000	0.85850000	7.79525366	0.875283
41	0.09945479	9.07424070	0.90247670		41.00000000	0.83756098	7.60022989	0.896642
42	0.10928223	9.08245180	0.99255059		42.00000000	0.81761905	7.42598559	0.918018
43	0.11943118	9.07889560	1.08430321		43.00000000	0.79860465	7.25044825	0.939502
44	0.12929064	9.07727530	1.17360673		44.00000000	0.78045455	7.08440077	0.960878
45	0.13941652	9.08087830	1.26602445		45.00000000	0.76311111	6.92971913	0.982221
46	0.14922237	9.07138730	1.35365391		46.00000000	0.74652174	6.77198782	1.003603
47	0.15938622	9.08609010	1.44819756		47.00000000	0.73063830	6.63864540	1.025087
48	0.16951358	9.07017520	1.53751787		48.00000000	0.71541667	6.48895451	1.046518
49	0.17934178	9.09286980	1.63073146		49.00000000	0.70081633	6.37243161	1.067880
50	0.18945724	9.07482340	1.71929099		50.00000000	0.68680000	6.23258871	1.089255
51	0.19927426	9.08472820	1.81035249		51.00000000	0.67333333	6.11705032	1.110725
52	0.20938228	9.08032890	1.90125997		52.00000000	0.66038462	5.99650951	1.132101
53	0.21923578	9.08303640	1.99132657		53.00000000	0.64792453	5.88512208	1.153439
54	0.22938621	9.07551100	2.08179707		54.00000000	0.63592593	5.77135274	1.174823
55	0.23919803	9.07396030	2.17047343		55.00000000	0.62436364	5.66545085	1.196302
56	0.24934475	9.08271410	2.26472708		56.00000000	0.61321429	5.56965004	1.217679
57	0.25950634	9.06110480	2.35141414		57.00000000	0.60245614	5.45891823	1.239046
58	0.26933306	9.07927800	2.44534973		58.00000000	0.59206897	5.37555873	1.260417
59	0.27946860	9.06521220	2.53344216		59.00000000	0.58203390	5.27626080	1.281906
60	0.28926480	9.07802300	2.62595251		60.00000000	0.57233333	5.19565516	1.303297
61	0.29944873	9.07225320	2.71667470		61.00000000	0.56295082	5.10723238	1.324678
62	0.30925906	9.06954960	2.80484038		62.00000000	0.55387097	5.02336021	1.346028
63	0.31940278	9.07577800	2.89882872		63.00000000	0.54507937	4.94701931	1.367510
64	0.32923397	9.07904430	2.98912980		64.00000000	0.53656250	4.87147471	1.388898
65	0.33938441	9.07460500	3.07977946		65.00000000	0.52830769	4.79418363	1.410297
66	0.34920219	9.07258510	3.16816659		66.00000000	0.52030303	4.72049352	1.431780
67	0.35935783	9.07342820	3.26060747		67.00000000	0.51253731	4.65047051	1.453144
68	0.36952165	9.07658100	3.35399319		68.00000000	0.50500000	4.58367341	1.474507
69	0.37931934	9.06889720	3.44000810		69.00000000	0.49768116	4.51341927	1.495886
70	0.38948390	9.07256890	3.53361952		70.00000000	0.49057143	4.45074309	1.517367
71	0.39931136	9.06778050	3.62086776		71.00000000	0.48366197	4.38574060	1.538758
72	0.40943575	9.07010170	3.71362389		72.00000000	0.47694444	4.32593462	1.560113
73	0.41926616	9.06678390	3.80139567		73.00000000	0.47041096	4.26511451	1.581482
74	0.42941809	9.05880830	3.89001616		74.00000000	0.46405405	4.20377672	1.602970
75	0.43923140	9.07917400	3.98785831		75.00000000	0.45786667	4.15705114	1.624341
76	0.44940120	9.05566220	4.06962546		76.00000000	0.45184211	4.09172947	1.645753
77	0.45951220	9.05541320	4.16107284		77.00000000	0.44597403	4.03847908	1.667137
78	0.46937239	9.05624490	4.25075131		78.00000000	0.44025641	3.98706987	1.688620
79	0.47951910	9.04593560	4.33769890		79.00000000	0.43468354	3.93211935	1.709991
80	0.48933464	9.05043030	4.42868905		80.00000000	0.42925000	3.88489721	1.731342
81	0.49947912	9.01282880	4.50171980		81.00000000	0.42395062	3.82099433	1.752767
82	0.50929469	9.01506520	4.59132484		82.00000000	0.41878049	3.77533340	1.774251
83	0.51945698	8.96985050	4.65945145		83.00000000	0.41373494	3.71114056	1.795626
84	0.52921230	8.95526790	4.73923792		84.00000000	0.40880952	3.66099881	1.816964
85	0.53934336	8.89653300	4.79828600		85.00000000	0.40400000	3.59419933	1.838340
86	0.54949307	8.83375740	4.85408847		86.00000000	0.39930233	3.52733987	1.859828
87	0.55930930	8.76227190	4.90082016		87.00000000	0.39471264	3.45857951	1.881211
88	0.56944638	8.58399200	4.88812317		88.00000000	0.39022727	3.34970779	1.902575
89	0.57924181	8.43346880	4.88501773		89.00000000	0.38584270	3.25399234	1.923941
90	0.58938557	8.15872760	4.80863632		90.00000000	0.38155556	3.11300784	1.945417
91	0.59920782	7.82519630	4.68891882		91.00000000	0.37736264	2.95293671	1.966846
92	0.60931283	7.35579200	4.48197844		92.00000000	0.37326087	2.74562932	1.988338
93	0.61908001	6.73678060	4.17060620		93.00000000	0.36924731	2.48753813	2.009748
94	0.62919694	5.92959020	3.73088001		94.00000000	0.36531915	2.16619285	2.031242
95	0.63935560	4.86217450	3.10865849		95.00000000	0.36147368	1.75754813	2.052606
96	0.64914507	3.60113860	2.33766137		96.00000000	0.35770833	1.28815729	2.074007
97	0.65917122	1.96144120	1.29292559		97.00000000	0.35402062	0.69439063	2.095495
98	0.66898751	0.06763311	0.04524570		98.00000000	0.35040816	0.02369919	2.116866
99	0.67904121	-2.26825000	-1.54023522		99.00000000	0.34686869	-0.78678490	2.138242
100	0.68877488	-4.90979720	-3.38174498		100.00000000	0.34340000	-1.68602436	2.159619
101	0.69900346	-8.11009410	-5.66898384		101.00000000	0.34000000	-2.75743199	2.181094
