# Supplementary material for: Study on the Electrical Injection Regeneration of Industrialized B-Doped Czochralski Silicon PERC Solar Cells
Source: Hindawi journal article supplement (doi:10.1155/2019/5357370), 2019-06-20
Supplement: f1 [file 5357370.f1.zip › section3.3/IVRawData_3-18-4h.csv]

00:33 04/04/2018
Test Lot:	JK-PERC
Recipe:	Recipe_YJX-LID
Cell Name:	3-18-4h
Test Order:	2
Test Condition:	Light
1	-0.29988730	9.10794450	-2.73135688		1.00000000	34.34000000	312.76681413	0.000000
2	-0.29009733	9.09654900	-2.63888458		2.00000000	17.17000000	156.18774633	0.061815
3	-0.27996945	9.11822990	-2.55282581		3.00000000	11.44666667	104.37333826	0.083244
4	-0.27014673	9.09855840	-2.45794580		4.00000000	8.58500000	78.11112386	0.104746
5	-0.25997791	9.11858840	-2.37063155		5.00000000	6.86800000	62.62646513	0.126122
6	-0.24982324	9.10797790	-2.27538455		6.00000000	5.72333333	52.12799351	0.147490
7	-0.24001466	9.10372160	-2.18502664		7.00000000	4.90571429	44.66025711	0.168866
8	-0.22986074	9.10346980	-2.09253030		8.00000000	4.29250000	39.07664412	0.190357
9	-0.22002015	9.10497380	-2.00327770		9.00000000	3.81555556	34.74053337	0.211739
10	-0.20985581	9.10918900	-1.91161624		10.00000000	3.43400000	31.28095503	0.233089
11	-0.20005541	9.11584660	-1.82367443		11.00000000	3.12181818	28.45801566	0.254458
12	-0.18989180	9.09571460	-1.72720162		12.00000000	2.86166667	26.02890328	0.275947
13	-0.18013085	9.10488700	-1.64007103		13.00000000	2.64153846	24.05090920	0.297319
14	-0.16998810	9.11860660	-1.55005461		14.00000000	2.45285714	22.36663933	0.318678
15	-0.16016686	9.08783530	-1.45557004		15.00000000	2.28933333	20.80508428	0.340052
16	-0.15000698	9.10655400	-1.36604666		16.00000000	2.14625000	19.54494152	0.361529
17	-0.13987464	9.11105820	-1.27440599		17.00000000	2.02000000	18.40433756	0.382921
18	-0.13003255	9.10750010	-1.18427146		18.00000000	1.90777778	17.37508630	0.404301
19	-0.11989798	9.10730650	-1.09194765		19.00000000	1.80736842	16.46025817	0.425666
20	-0.11005144	9.10549260	-1.00207257		20.00000000	1.71700000	15.63413079	0.447128
21	-0.09988784	9.11846640	-0.91082391		21.00000000	1.63523810	14.91086363	0.468489
22	-0.09009191	9.08782200	-0.81873921		22.00000000	1.56090909	14.18526398	0.489861
23	-0.07994543	9.10879520	-0.72820655		23.00000000	1.49304348	13.59982727	0.511245
24	-0.07013014	9.10375210	-0.63844741		24.00000000	1.43083333	13.02595196	0.532715
25	-0.05998217	9.10935780	-0.54639908		25.00000000	1.37360000	12.51261387	0.554085
26	-0.04984239	9.10452650	-0.45379137		26.00000000	1.32076923	12.02497846	0.575469
27	-0.04006581	9.11552810	-0.36522098		27.00000000	1.27185185	11.59360129	0.596960
28	-0.02990593	9.11080840	-0.27246720		28.00000000	1.22642857	11.17375573	0.618342
29	-0.02007874	9.11325170	-0.18298258		29.00000000	1.18413793	10.79134701	0.639701
30	-0.00991365	9.10461620	-0.09025997		30.00000000	1.14466667	10.42175068	0.661072
31	-0.00066400	9.09398560	-0.00603842		31.00000000	1.10774194	10.07378921	0.682666
32	0.00949641	9.11770530	0.08658549		32.00000000	1.07312500	9.78443750	0.704039
33	0.01931961	9.11079500	0.17601696		33.00000000	1.04060606	9.48074849	0.725383
34	0.02946208	9.10572150	0.26827345		34.00000000	1.01000000	9.19677872	0.746764
35	0.03925029	9.10517410	0.35738071		35.00000000	0.98114286	8.93347653	0.768245
36	0.04940839	9.09421920	0.44933070		36.00000000	0.95388889	8.67487465	0.789631
37	0.05926507	9.11304470	0.54008523		37.00000000	0.92810811	8.45789068	0.810983
38	0.06938447	9.10517220	0.63175756		38.00000000	0.90368421	8.22820035	0.832355
39	0.07952470	9.09595970	0.72335349		39.00000000	0.88051282	8.00910913	0.853832
40	0.08936874	9.11219500	0.81434537		40.00000000	0.85850000	7.82281941	0.875216
41	0.09949186	9.10134890	0.90551010		41.00000000	0.83756098	7.62293466	0.896579
42	0.10934035	9.09479330	0.99442788		42.00000000	0.81761905	7.43607624	0.917961
43	0.11947985	9.11558150	1.08912831		43.00000000	0.79860465	7.27974578	0.939432
44	0.12933654	9.10517690	1.17763208		44.00000000	0.78045455	7.10617670	0.960793
45	0.13946933	9.10218620	1.26947581		45.00000000	0.76311111	6.94597942	0.982148
46	0.14927392	9.10053250	1.35847216		46.00000000	0.74652174	6.79374535	1.003521
47	0.15944019	9.09516530	1.45013488		47.00000000	0.73063830	6.64527609	1.024982
48	0.16957374	9.11757850	1.54610189		48.00000000	0.71541667	6.52286762	1.046364
49	0.17940809	9.10037610	1.63268109		49.00000000	0.70081633	6.37769215	1.067725
50	0.18953940	9.10765550	1.72625956		50.00000000	0.68680000	6.25513780	1.089094
51	0.19931495	9.10807420	1.81537535		51.00000000	0.67333333	6.13276996	1.110591
52	0.20945892	9.09899230	1.90586510		52.00000000	0.66038462	6.00883453	1.131967
53	0.21931337	9.10425570	1.99668500		53.00000000	0.64792453	5.89887058	1.153341
54	0.22942458	9.10329820	2.08852037		54.00000000	0.63592593	5.78902334	1.174694
55	0.23926415	9.10199450	2.17778098		55.00000000	0.62436364	5.68295438	1.196175
56	0.24941704	9.10370540	2.27061925		56.00000000	0.61321429	5.58252220	1.217561
57	0.25956175	9.09852700	2.36162959		57.00000000	0.60245614	5.48146346	1.238944
58	0.26936260	9.10541060	2.45265707		58.00000000	0.59206897	5.39103103	1.260415
59	0.27947456	9.10199640	2.54377644		59.00000000	0.58203390	5.29767045	1.281811
60	0.28934464	9.09749510	2.63231144		60.00000000	0.57233333	5.20679970	1.303161
61	0.29947594	9.09725670	2.72440950		61.00000000	0.56295082	5.12130812	1.324528
62	0.30930212	9.10472010	2.81610923		62.00000000	0.55387097	5.04284013	1.346015
63	0.31945351	9.09816650	2.90644122		63.00000000	0.54507937	4.95922282	1.367390
64	0.32927299	9.09890080	2.99602227		64.00000000	0.53656250	4.88212896	1.388745
65	0.33942366	9.10508060	3.09047978		65.00000000	0.52830769	4.81028412	1.410126
66	0.34919846	9.08515740	3.17252297		66.00000000	0.52030303	4.72703493	1.431604
67	0.35937220	9.10090640	3.27061275		67.00000000	0.51253731	4.66455412	1.452984
68	0.36953029	9.09233670	3.35989382		68.00000000	0.50500000	4.59163003	1.474336
69	0.37937507	9.09869190	3.45181688		69.00000000	0.49768116	4.52824753	1.495713
70	0.38950861	9.09636880	3.54311397		70.00000000	0.49057143	4.46241864	1.517196
71	0.39930278	9.10155390	3.63427577		71.00000000	0.48366197	4.40207551	1.538581
72	0.40948170	9.08499050	3.72013735		72.00000000	0.47694444	4.33303575	1.559931
73	0.41926843	9.09771920	3.81438645		73.00000000	0.47041096	4.27966681	1.581310
74	0.42945257	9.09084610	3.90408722		74.00000000	0.46405405	4.21864399	1.602788
75	0.43929809	9.09429740	3.99510748		75.00000000	0.45786667	4.16397564	1.624168
76	0.44940633	9.08220960	4.08160248		76.00000000	0.45184211	4.10372471	1.645535
77	0.45958975	9.08355330	4.17470799		77.00000000	0.44597403	4.05102884	1.666904
78	0.46945313	9.07687090	4.26116545		78.00000000	0.44025641	3.99615060	1.688381
79	0.47959930	9.06084920	4.34557693		79.00000000	0.43468354	3.93860204	1.709765
80	0.48939645	9.06954100	4.43860117		80.00000000	0.42925000	3.89310047	1.731120
81	0.49951884	9.05059430	4.52094237		81.00000000	0.42395062	3.83700504	1.752474
82	0.50930780	9.03153040	4.59982888		82.00000000	0.41878049	3.78222871	1.773954
83	0.51947558	9.01055240	4.68076193		83.00000000	0.41373494	3.72798035	1.795326
84	0.52922207	8.98608780	4.75563599		84.00000000	0.40880952	3.67359827	1.816703
85	0.53938389	8.93635460	4.82012571		85.00000000	0.40400000	3.61028726	1.838056
86	0.54951823	8.88862230	4.88445999		86.00000000	0.39930233	3.54924756	1.859531
87	0.55935997	8.79149720	4.91761161		87.00000000	0.39471264	3.47011510	1.880917
88	0.56949282	8.69594760	4.95227972		88.00000000	0.39022727	3.39339592	1.902300
89	0.57930630	8.52813240	4.94040083		89.00000000	0.38584270	3.29051760	1.923784
90	0.58943093	8.29286380	4.88807042		90.00000000	0.38155556	3.16418825	1.945160
91	0.59922880	7.99934150	4.79343581		91.00000000	0.37736264	3.01865261	1.966504
92	0.60933185	7.54206900	4.59562286		92.00000000	0.37326087	2.81515923	1.987986
93	0.61914760	6.99734500	4.33238936		93.00000000	0.36924731	2.58375083	2.009496
94	0.62927443	6.21667810	3.91199657		94.00000000	0.36531915	2.27107155	2.030890
95	0.63938266	5.21162180	3.33222061		95.00000000	0.36147368	1.88386413	2.052295
96	0.64915150	3.95544170	2.56768091		96.00000000	0.35770833	1.41489446	2.073695
97	0.65928131	2.34773920	1.54782058		97.00000000	0.35402062	0.83114808	2.095192
98	0.66895789	0.41211614	0.27568834		98.00000000	0.35040816	0.14440886	2.116568
99	0.67907059	-1.98779020	-1.34984986		99.00000000	0.34686869	-0.68950218	2.137932
100	0.68881416	-4.74216320	-3.26646916		100.00000000	0.34340000	-1.62845884	2.159300
101	0.69901842	-8.10305880	-5.66418736		101.00000000	0.34000000	-2.75503999	2.180768
00:34 04/04/2018
Test Lot:	JK-PERC
Recipe:	Recipe_YJX-LID
Cell Name:	3-18-4h
Test Order:	3
Test Condition:	Light
1	-0.29991931	9.11369710	-2.73337375		1.00000000	34.34000000	312.96435841	0.000000
2	-0.29003927	9.10607530	-2.64111943		2.00000000	17.17000000	156.35131290	0.021586
3	-0.27994341	9.10180950	-2.54799159		3.00000000	11.44666667	104.18537941	0.042978
4	-0.27014971	9.10543440	-2.45983046		4.00000000	8.58500000	78.17015432	0.064331
5	-0.25997344	9.10132030	-2.36610155		5.00000000	6.86800000	62.50786782	0.085709
6	-0.24982697	9.10480500	-2.27462585		6.00000000	5.72333333	52.10983395	0.107197
7	-0.24004890	9.10481640	-2.18560116		7.00000000	4.90571429	44.66562788	0.128629
8	-0.22989126	9.10125160	-2.09229820		8.00000000	4.29250000	39.06712249	0.149985
9	-0.22006778	9.11225990	-2.00531481		9.00000000	3.81555556	34.76833389	0.171361
10	-0.20990939	9.09455110	-1.90903167		10.00000000	3.43400000	31.23068848	0.192836
11	-0.20009187	9.11829950	-1.82449760		11.00000000	3.12181818	28.46567317	0.214213
12	-0.18994316	9.10280900	-1.72901631		12.00000000	2.86166667	26.04920509	0.235563
13	-0.18016583	9.11234860	-1.64173385		13.00000000	2.64153846	24.07061930	0.256941
14	-0.17000075	9.10058780	-1.54710675		14.00000000	2.45285714	22.32244179	0.278427
15	-0.16018993	9.10924430	-1.45920921		15.00000000	2.28933333	20.85409662	0.299799
16	-0.15006280	9.11170770	-1.36732837		16.00000000	2.14625000	19.55600265	0.321169
17	-0.13989474	9.10156730	-1.27326139		17.00000000	2.02000000	18.38516595	0.342528
18	-0.13010177	9.10340310	-1.18436886		18.00000000	1.90777778	17.36727014	0.364057
19	-0.11991733	9.11881070	-1.09350343		19.00000000	1.80736842	16.48105050	0.385438
20	-0.11012661	9.10266400	-1.00244553		20.00000000	1.71700000	15.62927409	0.406815
21	-0.09995334	9.09819980	-0.90939545		21.00000000	1.63523810	14.87772291	0.428157
22	-0.09015442	9.10852810	-0.82117410		22.00000000	1.56090909	14.21758432	0.449629
23	-0.07999157	9.10503200	-0.72832582		23.00000000	1.49304348	13.59420865	0.471006
24	-0.07015917	9.10284900	-0.63864830		24.00000000	1.43083333	13.02465978	0.492393
25	-0.06003130	9.09745880	-0.54613223		25.00000000	1.37360000	12.49626941	0.513862
26	-0.04982304	9.12517550	-0.45464400		26.00000000	1.32076923	12.05225103	0.535233
27	-0.04000552	9.10161210	-0.36411476		27.00000000	1.27185185	11.57590220	0.556591
28	-0.02989477	9.11597160	-0.27251983		28.00000000	1.22642857	11.18008803	0.577965
29	-0.02005194	9.10950950	-0.18266337		29.00000000	1.18413793	10.78691573	0.599446
30	-0.00993300	9.10626510	-0.09045253		30.00000000	1.14466667	10.42363812	0.620840
31	-0.00065214	9.11426070	-0.00594382		31.00000000	1.10774194	10.09624879	0.642302
32	0.00950027	9.09856510	0.08643880		32.00000000	1.07312500	9.76389767	0.704013
33	0.01933331	9.10006710	0.17593444		33.00000000	1.04060606	9.46958498	0.725462
34	0.02949309	9.10441970	0.26851743		34.00000000	1.01000000	9.19546390	0.746838
35	0.03926883	9.09913920	0.35731250		35.00000000	0.98114286	8.92755543	0.768319
36	0.04944199	9.10217190	0.45002952		36.00000000	0.95388889	8.68246064	0.789709
37	0.05925420	9.11251830	0.53995497		37.00000000	0.92810811	8.45740212	0.811060
38	0.06939909	9.10105040	0.63160461		38.00000000	0.90368421	8.22447555	0.832444
39	0.07949560	9.09600350	0.72309226		39.00000000	0.88051282	8.00914770	0.853913
40	0.08934800	9.10262200	0.81330103		40.00000000	0.85850000	7.81460099	0.875291
41	0.09950330	9.09943100	0.90542342		41.00000000	0.83756098	7.62132831	0.896634
42	0.10930435	9.09822460	0.99447553		42.00000000	0.81761905	7.43888173	0.918011
43	0.11948868	9.10509400	1.08795566		43.00000000	0.79860465	7.27137042	0.939484
44	0.12927037	9.10017200	1.17638260		44.00000000	0.78045455	7.10227060	0.960854
45	0.13945769	9.09583190	1.26848371		45.00000000	0.76311111	6.94113039	0.982221
46	0.14924607	9.10931590	1.35952960		46.00000000	0.74652174	6.80030235	1.003597
47	0.15939319	9.09630200	1.44988859		47.00000000	0.73063830	6.64610661	1.025061
48	0.16956487	9.10412880	1.54374042		48.00000000	0.71541667	6.51324548	1.046449
49	0.17935178	9.10523030	1.63303926		49.00000000	0.70081633	6.38109405	1.067811
50	0.18951675	9.10447310	1.72545015		50.00000000	0.68680000	6.25295213	1.089173
51	0.19932450	9.10305600	1.81446209		51.00000000	0.67333333	6.12939104	1.110663
52	0.20945600	9.10791400	1.90770723		52.00000000	0.66038462	6.01472628	1.132039
53	0.21927862	9.10470680	1.99646754		53.00000000	0.64792453	5.89916286	1.153435
54	0.22944658	9.10404210	2.08889132		54.00000000	0.63592593	5.78949640	1.174783
55	0.23926400	9.11180110	2.18012598		55.00000000	0.62436364	5.68907727	1.196262
56	0.24939772	9.08829980	2.26660125		56.00000000	0.61321429	5.57307527	1.217647
57	0.25955600	9.10889910	2.36426941		57.00000000	0.60245614	5.48771219	1.239038
58	0.26936671	9.09022240	2.44860330		58.00000000	0.59206897	5.38203857	1.260517
59	0.27951831	9.10140710	2.54400993		59.00000000	0.58203390	5.29732745	1.281903
60	0.28932306	9.09798430	2.63225666		60.00000000	0.57233333	5.20707968	1.303243
61	0.29950443	9.09526920	2.72407342		61.00000000	0.56295082	5.12018925	1.324655
62	0.30931515	9.09817980	2.81420485		62.00000000	0.55387097	5.03921765	1.346139
63	0.31944218	9.09813310	2.90632747		63.00000000	0.54507937	4.95920461	1.367517
64	0.32929233	9.09082320	2.99353835		64.00000000	0.53656250	4.87779482	1.388867
65	0.33941415	9.11289410	3.09304520		65.00000000	0.52830769	4.81441205	1.410234
66	0.34922934	9.08883190	3.17408677		66.00000000	0.52030303	4.72894678	1.431708
67	0.35940698	9.10160450	3.27118019		67.00000000	0.51253731	4.66491192	1.453101
68	0.36955854	9.09876540	3.36252646		68.00000000	0.50500000	4.59487653	1.474455
69	0.37935513	9.10624500	3.45450076		69.00000000	0.49768116	4.53200657	1.495822
70	0.38951340	9.09757710	3.54362819		70.00000000	0.49057143	4.46301139	1.517298
71	0.39934126	9.09663770	3.63266276		71.00000000	0.48366197	4.39969773	1.538676
72	0.40950549	9.09631730	3.72499187		72.00000000	0.47694444	4.33843800	1.560020
73	0.41931027	9.08875080	3.81100655		73.00000000	0.47041096	4.27544798	1.581403
74	0.42943802	9.09049420	3.90380383		74.00000000	0.46405405	4.21848069	1.602881
75	0.43925619	9.09335800	3.99431379		75.00000000	0.45786667	4.16354552	1.624256
76	0.44943234	9.08361720	4.08247133		76.00000000	0.45184211	4.10436072	1.645620
77	0.45955268	9.07359220	4.16979361		77.00000000	0.44597403	4.04658644	1.666999
78	0.46941623	9.07028580	4.25773937		78.00000000	0.44025641	3.99325147	1.688501
79	0.47952986	9.06810470	4.34842698		79.00000000	0.43468354	3.94175589	1.709877
80	0.48935843	9.06038950	4.43377798		80.00000000	0.42925000	3.88917219	1.731244
81	0.49951300	9.05800150	4.52458950		81.00000000	0.42395062	3.84014533	1.752616
82	0.50934011	9.03619290	4.60249549		82.00000000	0.41878049	3.78418127	1.774101
83	0.51949018	9.02542970	4.68862210		83.00000000	0.41373494	3.73413561	1.795473
84	0.52925622	8.98340800	4.75452456		84.00000000	0.40880952	3.67250275	1.816856
85	0.53937805	8.94385340	4.82411821		85.00000000	0.40400000	3.61331677	1.838196
86	0.54956168	8.88589190	4.88334568		86.00000000	0.39930233	3.54815730	1.859705
87	0.55938798	8.80573270	4.92582103		87.00000000	0.39471264	3.47573403	1.881100
88	0.56951129	8.68897630	4.94847010		88.00000000	0.39022727	3.39067552	1.902483
89	0.57930934	8.51829050	4.93472525		89.00000000	0.38584270	3.28672018	1.923953
90	0.58943862	8.29300210	4.88821571		90.00000000	0.38155556	3.16424102	1.945336
91	0.59926271	7.97939250	4.78175237		91.00000000	0.37736264	3.01112460	1.966691
92	0.60939276	7.56207080	4.60827120		92.00000000	0.37326087	2.82262512	1.988165
93	0.61917669	6.99788570	4.33292770		93.00000000	0.36924731	2.58395048	2.009663
94	0.62924939	6.20031210	3.90154261		94.00000000	0.36531915	2.26509274	2.031041
95	0.63940543	5.20638130	3.32898847		95.00000000	0.36147368	1.88196983	2.052398
96	0.64921761	3.95449880	2.56733026		96.00000000	0.35770833	1.41455717	2.073781
97	0.65929556	2.32982560	1.53604367		97.00000000	0.35402062	0.82480630	2.095253
98	0.66903704	0.40512165	0.27104139		98.00000000	0.35040816	0.14195793	2.116706
99	0.67911941	-2.00799510	-1.36366845		99.00000000	0.34686869	-0.69651062	2.138096
100	0.68883115	-4.76474670	-3.28210595		100.00000000	0.34340000	-1.63621402	2.159477
101	0.69901699	-8.13617710	-5.68732603		101.00000000	0.34000000	-2.76630021	2.180965
00:34 04/04/2018
Test Lot:	JK-PERC
Recipe:	Recipe_YJX-LID
Cell Name:	3-18-4h
Test Order:	4
Test Condition:	Light
1	-0.29994833	9.10802650	-2.73193734		1.00000000	34.34000000	312.76963001	0.000000
2	-0.29009140	9.11326310	-2.64367925		2.00000000	17.17000000	156.47472743	0.061797
3	-0.27995759	9.09789660	-2.54702521		3.00000000	11.44666667	104.14058975	0.083230
4	-0.27014381	9.11349010	-2.46195294		4.00000000	8.58500000	78.23931251	0.104722
5	-0.25997725	9.10400580	-2.36683439		5.00000000	6.86800000	62.52631183	0.126130
6	-0.24980922	9.10295490	-2.27400206		6.00000000	5.72333333	52.09924521	0.147536
7	-0.24000959	9.10984900	-2.18645112		7.00000000	4.90571429	44.69031638	0.168928
8	-0.22983040	9.10108570	-2.09170617		8.00000000	4.29250000	39.06641037	0.190414
9	-0.22000471	9.10359570	-2.00283393		9.00000000	3.81555556	34.73527515	0.211803
10	-0.20990887	9.09084030	-1.90824801		10.00000000	3.43400000	31.21794559	0.233161
11	-0.20006755	9.11100200	-1.82281585		11.00000000	3.12181818	28.44289170	0.254529
12	-0.18990695	9.10824680	-1.72971937		12.00000000	2.86166667	26.06476626	0.276013
13	-0.18012072	9.09370040	-1.63796386		13.00000000	2.64153846	24.02135936	0.297381
14	-0.16997129	9.11522960	-1.54932733		14.00000000	2.45285714	22.35835603	0.318773
15	-0.16015528	9.09548660	-1.45669020		15.00000000	2.28933333	20.82260066	0.340116
16	-0.15001404	9.10491750	-1.36586546		16.00000000	2.14625000	19.54142918	0.361586
17	-0.13985643	9.11217020	-1.27439559		17.00000000	2.02000000	18.40658380	0.382962
18	-0.13007465	9.10482690	-1.18430717		18.00000000	1.90777778	17.36998643	0.404339
19	-0.11991926	9.11214350	-1.09272151		19.00000000	1.80736842	16.46900041	0.425830
20	-0.11008019	9.09916310	-1.00163760		20.00000000	1.71700000	15.62326304	0.447212
21	-0.09993225	9.10496230	-0.90987933		21.00000000	1.63523810	14.88878121	0.468553
22	-0.09011178	9.10931020	-0.82085613		22.00000000	1.56090909	14.21880510	0.489935
23	-0.07997053	9.10163780	-0.72786281		23.00000000	1.49304348	13.58914096	0.511421
24	-0.07013889	9.10411260	-0.63855239		24.00000000	1.43083333	13.02646778	0.532791
25	-0.06000807	9.10443500	-0.54633955		25.00000000	1.37360000	12.50585192	0.554150
26	-0.04984524	9.10163780	-0.45367329		26.00000000	1.32076923	12.02116316	0.575522
27	-0.04004561	9.11566350	-0.36504229		27.00000000	1.27185185	11.59377350	0.596998
28	-0.02989990	9.09457020	-0.27192671		28.00000000	1.22642857	11.15384074	0.618381
29	-0.02006008	9.11155990	-0.18277857		29.00000000	1.18413793	10.78934369	0.639738
30	-0.00995306	9.10210990	-0.09059389		30.00000000	1.14466667	10.41888180	0.661112
31	-0.00068558	9.10539150	-0.00624245		31.00000000	1.10774194	10.08642400	0.682705
32	0.00948002	9.09686470	0.08623847		32.00000000	1.07312500	9.76207293	0.704090
33	0.01929649	9.10810470	0.17575447		33.00000000	1.04060606	9.47794895	0.725449
34	0.02943001	9.10286620	0.26789741		34.00000000	1.01000000	9.19389486	0.746827
35	0.03928145	9.09867190	0.35740906		35.00000000	0.98114286	8.92709694	0.768309
36	0.04944772	9.10531430	0.45023699		36.00000000	0.95388889	8.68545814	0.789696
37	0.05925674	9.10137080	0.53931760		37.00000000	0.92810811	8.44705603	0.811052
38	0.06937760	9.10080810	0.63139223		38.00000000	0.90368421	8.22425658	0.832423
39	0.07956024	9.09868530	0.72389354		39.00000000	0.88051282	8.01150906	0.853902
40	0.08936257	9.10940170	0.81403954		40.00000000	0.85850000	7.82042136	0.875295
41	0.09951989	9.09372430	0.90500648		41.00000000	0.83756098	7.61654860	0.896668
42	0.10933488	9.10363200	0.99534451		42.00000000	0.81761905	7.44330293	0.918046
43	0.11949816	9.10021780	1.08745928		43.00000000	0.79860465	7.26747626	0.939524
44	0.12927593	9.09109690	1.17526001		44.00000000	0.78045455	7.09518790	0.960912
45	0.13944592	9.10956190	1.27029124		45.00000000	0.76311111	6.95160790	0.982297
46	0.14930108	9.09605220	1.35805042		46.00000000	0.74652174	6.79040071	1.003638
47	0.15943237	9.10454180	1.45155868		47.00000000	0.73063830	6.65212692	1.025117
48	0.16957927	9.10668950	1.54430576		48.00000000	0.71541667	6.51507745	1.046482
49	0.17940691	9.09493920	1.63169494		49.00000000	0.70081633	6.37388188	1.067856
50	0.18953967	9.11045840	1.72679328		50.00000000	0.68680000	6.25706283	1.089342
51	0.19929586	9.08262920	1.81013040		51.00000000	0.67333333	6.11563699	1.110710
52	0.20942193	9.11258600	1.90837535		52.00000000	0.66038462	6.01781160	1.132068
53	0.21926370	9.09602360	1.99442779		53.00000000	0.64792453	5.89353680	1.153454
54	0.22943667	9.10309120	2.08858293		54.00000000	0.63592593	5.78889170	1.174930
55	0.23925835	9.10550980	2.17856925		55.00000000	0.62436364	5.68514921	1.196310
56	0.24939856	9.09709170	2.26880157		56.00000000	0.61321429	5.57846659	1.217664
57	0.25952613	9.09596060	2.36063945		57.00000000	0.60245614	5.47991732	1.239052
58	0.26935002	9.09911920	2.45084794		58.00000000	0.59206897	5.38730609	1.260517
59	0.27951777	9.11312680	2.54728088		59.00000000	0.58203390	5.30414872	1.281888
60	0.28931415	9.09107690	2.63017719		60.00000000	0.57233333	5.20312635	1.303226
61	0.29946926	9.09353540	2.72323432		61.00000000	0.56295082	5.11921321	1.324606
62	0.30931029	9.10295770	2.81563849		62.00000000	0.55387097	5.04186399	1.346093
63	0.31943339	9.10257050	2.90766495		63.00000000	0.54507937	4.96162335	1.367472
64	0.32923943	9.09045310	2.99293560		64.00000000	0.53656250	4.87759624	1.388827
65	0.33938858	9.10133740	3.08888998		65.00000000	0.52830769	4.80830656	1.410206
66	0.34923035	9.10219000	3.17876100		66.00000000	0.52030303	4.73589704	1.431692
67	0.35938394	9.09810450	3.26971264		67.00000000	0.51253731	4.66311804	1.453082
68	0.36955765	9.10981560	3.36660205		68.00000000	0.50500000	4.60045688	1.474428
69	0.37937263	9.09028630	3.44860582		69.00000000	0.49768116	4.52406423	1.495808
70	0.38951805	9.11433790	3.55019913		70.00000000	0.49057143	4.47123376	1.517292
71	0.39933527	9.08189300	3.62672019		71.00000000	0.48366197	4.39256628	1.538666
72	0.40946731	9.10964680	3.73010257		72.00000000	0.47694444	4.34479543	1.560033
73	0.41926888	9.08806130	3.81034128		73.00000000	0.47041096	4.27512363	1.581397
74	0.42943886	9.09690000	3.90656237		74.00000000	0.46405405	4.22145332	1.602870
75	0.43928808	9.08289150	3.99000597		75.00000000	0.45786667	4.15875325	1.624261
76	0.44943202	9.08833030	4.08458665		76.00000000	0.45184211	4.10649030	1.645648
77	0.45955363	9.07963660	4.17257996		77.00000000	0.44597403	4.04928209	1.666984
78	0.46942219	9.06921100	4.25728889		78.00000000	0.44025641	3.99277828	1.688456
79	0.47956240	9.06929590	4.34929331		79.00000000	0.43468354	3.94227369	1.709825
80	0.48939228	9.06228160	4.43501065		80.00000000	0.42925000	3.88998438	1.731201
81	0.49951163	9.04898930	4.52007540		81.00000000	0.42395062	3.83632460	1.752674
82	0.50930655	9.03788280	4.60305291		82.00000000	0.41878049	3.78488897	1.774043
83	0.51946759	9.01318930	4.68205972		83.00000000	0.41373494	3.72907133	1.795385
84	0.52926397	8.98728470	4.75664598		84.00000000	0.40880952	3.67408758	1.816756
85	0.53940940	8.94099620	4.82285740		85.00000000	0.40400000	3.61216246	1.838236
86	0.54952729	8.88493060	4.88251183		86.00000000	0.39930233	3.54777345	1.859613
87	0.55935788	8.78868870	4.91602228		87.00000000	0.39471264	3.46900655	1.880980
88	0.56950104	8.69170190	4.94993327		88.00000000	0.39022727	3.39173913	1.902351
89	0.57931900	8.51829150	4.93480811		89.00000000	0.38584270	3.28672056	1.923814
90	0.58941907	8.29508690	4.88928241		90.00000000	0.38155556	3.16503649	1.945180
91	0.59923029	7.99405620	4.79028062		91.00000000	0.37736264	3.01665813	1.966518
92	0.60935193	7.56109330	4.60736680		92.00000000	0.37326087	2.82226026	1.987988
93	0.61915272	6.97525740	4.31874959		93.00000000	0.36924731	2.57559504	2.009498
94	0.62926173	6.22573800	3.91761866		94.00000000	0.36531915	2.27438131	2.030872
95	0.63940710	5.21604060	3.33517339		95.00000000	0.36147368	1.88546141	2.052230
96	0.64916778	3.95914460	2.57014911		96.00000000	0.35770833	1.41621902	2.073599
97	0.65930128	2.33026500	1.53634670		97.00000000	0.35402062	0.82496186	2.095089
98	0.66898453	0.40399808	0.27026847		98.00000000	0.35040816	0.14156423	2.116504
99	0.67910022	-2.01960540	-1.37151447		99.00000000	0.34686869	-0.70053787	2.137886
100	0.68883777	-4.79359870	-3.30201184		100.00000000	0.34340000	-1.64612179	2.159309
101	0.69905835	-8.19207000	-5.72673494		101.00000000	0.34000000	-2.78530380	2.180801
