# Supplementary material for: Study on the Electrical Injection Regeneration of Industrialized B-Doped Czochralski Silicon PERC Solar Cells
Source: Hindawi journal article supplement (doi:10.1155/2019/5357370), 2019-06-20
Supplement: f1 [file 5357370.f1.zip › section3.3/IVRawData_3-18-5h.csv]

01:42 04/04/2018
Test Lot:	JK-PERC
Recipe:	Recipe_YJX-LID
Cell Name:	3-18-5h
Test Order:	2
Test Condition:	Light
1	-0.29992923	9.10583020	-2.73110464		1.00000000	34.34000000	312.69420907	0.000000
2	-0.29012066	9.09779830	-2.63945925		2.00000000	17.17000000	156.20919681	0.061773
3	-0.28001884	9.09729770	-2.54741475		3.00000000	11.44666667	104.13373434	0.083185
4	-0.27012616	9.10950570	-2.46071579		4.00000000	8.58500000	78.20510643	0.104680
5	-0.25998640	9.09311200	-2.36408545		5.00000000	6.86800000	62.45149322	0.126055
6	-0.24983399	9.10204220	-2.27399952		6.00000000	5.72333333	52.09402152	0.147454
7	-0.23998597	9.10572340	-2.18524586		7.00000000	4.90571429	44.67007737	0.168796
8	-0.22984025	9.09167670	-2.08963325		8.00000000	4.29250000	39.02602223	0.190265
9	-0.22001754	9.09739590	-2.00158667		9.00000000	3.81555556	34.71161947	0.211630
10	-0.20989788	9.11067390	-1.91231114		10.00000000	3.43400000	31.28605417	0.233017
11	-0.20004614	9.09712700	-1.81984514		11.00000000	3.12181818	28.39957647	0.254510
12	-0.18991306	9.08986380	-1.72628385		12.00000000	2.86166667	26.01216024	0.275879
13	-0.18013278	9.11877920	-1.64259105		13.00000000	2.64153846	24.08760598	0.297225
14	-0.17000790	9.09458730	-1.54615169		14.00000000	2.45285714	22.30772342	0.318602
15	-0.16014202	9.10097890	-1.45744915		15.00000000	2.28933333	20.83517436	0.340079
16	-0.15000300	9.10055350	-1.36511033		16.00000000	2.14625000	19.53206295	0.361454
17	-0.13982899	9.10584740	-1.27326145		17.00000000	2.02000000	18.39381175	0.382812
18	-0.13002340	9.10879140	-1.18435603		18.00000000	1.90777778	17.37754982	0.404187
19	-0.11990150	9.09284970	-1.09024632		19.00000000	1.80736842	16.43412941	0.425652
20	-0.11007209	9.11703400	-1.00353099		20.00000000	1.71700000	15.65394738	0.447033
21	-0.09994052	9.10148140	-0.90960675		21.00000000	1.63523810	14.88308911	0.468388
22	-0.09008357	9.09979250	-0.81974179		22.00000000	1.56090909	14.20394884	0.489768
23	-0.07996836	9.10645100	-0.72822798		23.00000000	1.49304348	13.59632728	0.511240
24	-0.07014044	9.09897610	-0.63820615		24.00000000	1.43083333	13.01911830	0.532612
25	-0.05999696	9.09740450	-0.54581657		25.00000000	1.37360000	12.49619482	0.553962
26	-0.04984305	9.08745570	-0.45294648		26.00000000	1.32076923	12.00243187	0.575329
27	-0.04003969	9.09541990	-0.36417778		27.00000000	1.27185185	11.56802664	0.596813
28	-0.02989695	9.10904790	-0.27233270		28.00000000	1.22642857	11.17159660	0.618200
29	-0.02007051	9.10225870	-0.18268699		29.00000000	1.18413793	10.77832978	0.639544
30	-0.00991288	9.09988400	-0.09020610		30.00000000	1.14466667	10.41633389	0.660911
31	-0.00065730	9.10662460	-0.00598576		31.00000000	1.10774194	10.08778996	0.682495
32	0.00948673	9.09476380	0.08627953		32.00000000	1.07312500	9.75981840	0.703872
33	0.01931288	9.09876250	0.17572328		33.00000000	1.04060606	9.46822740	0.725240
34	0.02942928	9.10623260	0.26798990		34.00000000	1.01000000	9.19729493	0.746619
35	0.03926957	9.09523770	0.35716611		35.00000000	0.98114286	8.92372750	0.768091
36	0.04943287	9.08800320	0.44924604		36.00000000	0.95388889	8.66894527	0.789480
37	0.05924860	9.10259250	0.53931586		37.00000000	0.92810811	8.44818990	0.810852
38	0.06938957	9.09436040	0.63105373		38.00000000	0.90368421	8.21842990	0.832188
39	0.07949629	9.10215850	0.72358787		39.00000000	0.88051282	8.01456725	0.853660
40	0.08936189	9.09572510	0.81281119		40.00000000	0.85850000	7.80868000	0.875042
41	0.09954230	9.10167790	0.90600192		41.00000000	0.83756098	7.62321022	0.896427
42	0.10932529	9.10552500	0.99546416		42.00000000	0.81761905	7.44485068	0.917909
43	0.11948784	9.08262920	1.08526374		43.00000000	0.79860465	7.25342992	0.939281
44	0.12927753	9.09826660	1.17620143		44.00000000	0.78045455	7.10078352	0.960618
45	0.13941254	9.09055520	1.26733739		45.00000000	0.76311111	6.93710368	0.982005
46	0.14925803	9.10755630	1.35937591		46.00000000	0.74652174	6.79898877	1.003487
47	0.15943547	9.10256580	1.45127186		47.00000000	0.73063830	6.65068318	1.024860
48	0.16956230	9.09862040	1.54278300		48.00000000	0.71541667	6.50930468	1.046218
49	0.17938323	9.09132100	1.63083053		49.00000000	0.70081633	6.37134619	1.067591
50	0.18951824	9.10091020	1.72478848		50.00000000	0.68680000	6.25050513	1.089060
51	0.19932355	9.08938500	1.81172849		51.00000000	0.67333333	6.12018590	1.110434
52	0.20945336	9.10254760	1.90655918		52.00000000	0.66038462	6.01118240	1.131779
53	0.21927653	9.09757800	1.99488534		53.00000000	0.64792453	5.89454393	1.153155
54	0.22945620	9.09726910	2.08742480		54.00000000	0.63592593	5.78518928	1.174634
55	0.23927119	9.10489750	2.17853966		55.00000000	0.62436364	5.68476691	1.196012
56	0.24941885	9.09792330	2.26919357		56.00000000	0.61321429	5.57897654	1.217384
57	0.25954196	9.10848900	2.36403509		57.00000000	0.60245614	5.48746513	1.238753
58	0.26935247	9.10320850	2.45197169		58.00000000	0.59206897	5.38972724	1.260237
59	0.27950236	9.11132430	2.54663664		59.00000000	0.58203390	5.30309960	1.281622
60	0.28933522	9.10040660	2.63306815		60.00000000	0.57233333	5.20846604	1.302971
61	0.29946503	9.10143760	2.72556228		61.00000000	0.56295082	5.12366176	1.324343
62	0.30932170	9.09542180	2.81341133		62.00000000	0.55387097	5.03769007	1.345813
63	0.31943437	9.08039950	2.90059169		63.00000000	0.54507937	4.94953839	1.367182
64	0.32923672	9.09746270	2.99521878		64.00000000	0.53656250	4.88135733	1.388586
65	0.33937991	9.08719060	3.08400993		65.00000000	0.52830769	4.80083270	1.409950
66	0.34925294	9.09752750	3.17733823		66.00000000	0.52030303	4.73347113	1.431440
67	0.35939094	9.10113240	3.27086453		67.00000000	0.51253731	4.66466995	1.452824
68	0.36953861	9.08671000	3.35789018		68.00000000	0.50500000	4.58878855	1.474205
69	0.37935731	9.08957860	3.44819809		69.00000000	0.49768116	4.52371202	1.495554
70	0.38948488	9.09113600	3.54086001		70.00000000	0.49057143	4.45985157	1.517025
71	0.39930061	9.08685020	3.62838483		71.00000000	0.48366197	4.39496389	1.538394
72	0.40947655	9.09209350	3.72299908		72.00000000	0.47694444	4.33642348	1.559764
73	0.41932279	9.08363720	3.80897609		73.00000000	0.47041096	4.27304249	1.581259
74	0.42943624	9.08588890	3.90180997		74.00000000	0.46405405	4.21634358	1.602643
75	0.43929216	9.09018420	3.99324665		75.00000000	0.45786667	4.16209234	1.623985
76	0.44938624	9.07382110	4.07765035		76.00000000	0.45184211	4.09993443	1.645363
77	0.45956069	9.08773610	4.17636627		77.00000000	0.44597403	4.05289426	1.666831
78	0.46943074	9.07066820	4.25805049		78.00000000	0.44025641	3.99341982	1.688212
79	0.47955683	9.06430150	4.34684769		79.00000000	0.43468354	3.94010270	1.709573
80	0.48937926	9.05823330	4.43291151		80.00000000	0.42925000	3.88824664	1.730950
81	0.49949491	9.04386230	4.51736319		81.00000000	0.42395062	3.83415100	1.752430
82	0.50931287	9.02970500	4.59894497		82.00000000	0.41878049	3.78146426	1.773804
83	0.51947987	8.99481490	4.67262527		83.00000000	0.41373494	3.72146920	1.795150
84	0.52925617	8.99056240	4.75831062		84.00000000	0.40880952	3.67542753	1.816531
85	0.53940982	8.92993830	4.81689641		85.00000000	0.40400000	3.60769507	1.838016
86	0.54952693	8.86506460	4.87159173		86.00000000	0.39930233	3.53984091	1.859391
87	0.55935681	8.79553320	4.91984139		87.00000000	0.39471264	3.47170816	1.880752
88	0.56951642	8.66247270	4.93342044		88.00000000	0.39022727	3.38033310	1.902122
89	0.57931054	8.49981020	4.92402964		89.00000000	0.38584270	3.27958969	1.923605
90	0.58942693	8.26572130	4.87203873		90.00000000	0.38155556	3.15383188	1.944983
91	0.59922183	7.96029620	4.76998326		91.00000000	0.37736264	3.00391837	1.966337
92	0.60934347	7.50526710	4.57328550		92.00000000	0.37326087	2.80142252	1.987834
93	0.61914206	6.94144820	4.29774254		93.00000000	0.36924731	2.56311109	2.009351
94	0.62927783	6.15785310	3.87500044		94.00000000	0.36531915	2.24958165	2.030735
95	0.63939649	5.13313480	3.28210837		95.00000000	0.36147368	1.85549315	2.052101
96	0.64916754	3.86951660	2.51196457		96.00000000	0.35770833	1.38415833	2.073469
97	0.65928394	2.26967480	1.49636014		97.00000000	0.35402062	0.80351168	2.094956
98	0.66900516	0.33074158	0.22126782		98.00000000	0.35040816	0.11589455	2.116349
99	0.67909926	-2.06279230	-1.40084072		99.00000000	0.34686869	-0.71551806	2.137726
100	0.68879145	-4.78857800	-3.29833158		100.00000000	0.34340000	-1.64439769	2.159075
101	0.69901204	-8.11330130	-5.67129529		101.00000000	0.34000000	-2.75852244	2.180545
01:43 04/04/2018
Test Lot:	JK-PERC
Recipe:	Recipe_YJX-LID
Cell Name:	3-18-5h
Test Order:	3
Test Condition:	Light
1	-0.29992613	9.09349540	-2.72737688		1.00000000	34.34000000	312.27063204	0.000000
2	-0.29008031	9.10225010	-2.64038353		2.00000000	17.17000000	156.28563422	0.061799
3	-0.27994350	9.10628600	-2.54924557		3.00000000	11.44666667	104.23662041	0.083263
4	-0.27015352	9.09395790	-2.45676474		4.00000000	8.58500000	78.07162857	0.104765
5	-0.25994378	9.09545800	-2.36430773		5.00000000	6.86800000	62.46760554	0.126147
6	-0.24982260	9.09969710	-2.27330999		6.00000000	5.72333333	52.08059974	0.147484
7	-0.23999466	9.10359860	-2.18481505		7.00000000	4.90571429	44.65965370	0.168867
8	-0.22982064	9.09437180	-2.09007435		8.00000000	4.29250000	39.03759095	0.190354
9	-0.22001874	9.10787490	-2.00390316		9.00000000	3.81555556	34.75160267	0.211722
10	-0.20987077	9.09357360	-1.90847529		10.00000000	3.43400000	31.22733174	0.233075
11	-0.20003092	9.09748940	-1.81977917		11.00000000	3.12181818	28.40070782	0.254439
12	-0.18991272	9.10612870	-1.72936967		12.00000000	2.86166667	26.05870496	0.275916
13	-0.18012348	9.09824660	-1.63880784		13.00000000	2.64153846	24.03336833	0.297305
14	-0.16996732	9.11390110	-1.54906534		14.00000000	2.45285714	22.35509741	0.318653
15	-0.16011259	9.10138420	-1.45724620		15.00000000	2.28933333	20.83610223	0.340027
16	-0.14997056	9.09455870	-1.36391606		16.00000000	2.14625000	19.51919661	0.361532
17	-0.13981813	9.09756570	-1.27200462		17.00000000	2.02000000	18.37708271	0.382910
18	-0.13003483	9.09678840	-1.18289933		18.00000000	1.90777778	17.35465076	0.404273
19	-0.11986157	9.10244750	-1.09103365		19.00000000	1.80736842	16.45147617	0.425642
20	-0.11002246	9.08849720	-0.99993882		20.00000000	1.71700000	15.60494969	0.447121
21	-0.09990425	9.09429450	-0.90855871		21.00000000	1.63523810	14.87133682	0.468500
22	-0.09005398	9.10099510	-0.81958086		22.00000000	1.56090909	14.20582599	0.489841
23	-0.07993429	9.10463710	-0.72777272		23.00000000	1.49304348	13.59361904	0.511212
24	-0.07010859	9.09923840	-0.63793473		24.00000000	1.43083333	13.01949361	0.532680
25	-0.05993829	9.09876440	-0.54536433		25.00000000	1.37360000	12.49806278	0.554053
26	-0.04978957	9.10420130	-0.45329427		26.00000000	1.32076923	12.02454895	0.575426
27	-0.03996833	9.07988740	-0.36290791		27.00000000	1.27185185	11.54827160	0.596777
28	-0.02982482	9.10482220	-0.27154967		28.00000000	1.22642857	11.16641408	0.618258
29	-0.01999390	9.09653090	-0.18187512		29.00000000	1.18413793	10.77154728	0.639636
30	-0.00988537	9.10516070	-0.09000791		30.00000000	1.14466667	10.42237395	0.661025
31	-0.00065582	9.08815290	-0.00596015		31.00000000	1.10774194	10.06732808	0.682571
32	0.00951204	9.10612580	0.08661787		32.00000000	1.07312500	9.77201125	0.704028
33	0.01934715	9.08846380	0.17583585		33.00000000	1.04060606	9.45751051	0.725407
34	0.02946506	9.10616210	0.26831364		34.00000000	1.01000000	9.19722372	0.746762
35	0.03931059	9.08895590	0.35729218		35.00000000	0.98114286	8.91756416	0.768139
36	0.04941287	9.10481360	0.44989496		36.00000000	0.95388889	8.68498053	0.789627
37	0.05927030	9.10410590	0.53960309		37.00000000	0.92810811	8.44959450	0.810999
38	0.06940831	9.10119060	0.63169828		38.00000000	0.90368421	8.22460224	0.832379
39	0.07958428	9.10236550	0.72440519		39.00000000	0.88051282	8.01474952	0.853748
40	0.08936654	9.10151290	0.81337072		40.00000000	0.85850000	7.81364882	0.875228
41	0.09953432	9.09475040	0.90523978		41.00000000	0.83756098	7.61740802	0.896605
42	0.10934784	9.10281470	0.99537313		42.00000000	0.81761905	7.44263469	0.917982
43	0.11950371	9.08809470	1.08606103		43.00000000	0.79860465	7.25779470	0.939329
44	0.12932095	9.11461540	1.17871072		44.00000000	0.78045455	7.11354302	0.960799
45	0.13945077	9.08084010	1.26633014		45.00000000	0.76311111	6.92968998	0.982175
46	0.14929183	9.10675330	1.35956387		46.00000000	0.74652174	6.79838931	1.003557
47	0.15943430	9.08878710	1.44906441		47.00000000	0.73063830	6.64061594	1.025030
48	0.16959836	9.10424330	1.54406473		48.00000000	0.71541667	6.51332739	1.046417
49	0.17942676	9.09703830	1.63225211		49.00000000	0.70081633	6.37535296	1.067783
50	0.18957520	9.08745860	1.72275678		50.00000000	0.68680000	6.24126657	1.089160
51	0.19935894	9.08601670	1.81137866		51.00000000	0.67333333	6.11791791	1.110637
52	0.20949100	9.09259610	1.90481705		52.00000000	0.66038462	6.00461058	1.132015
53	0.21932907	9.08850380	1.99337309		53.00000000	0.64792453	5.88866454	1.153357
54	0.22946857	9.09102340	2.08610414		54.00000000	0.63592593	5.78121747	1.174726
55	0.23928730	9.08796120	2.17463370		55.00000000	0.62436364	5.67419250	1.196203
56	0.24943946	9.10008240	2.26991964		56.00000000	0.61321429	5.58030053	1.217578
57	0.25957376	9.09551330	2.36095659		57.00000000	0.60245614	5.47964784	1.238916
58	0.26941407	9.09526440	2.45039220		58.00000000	0.59206897	5.38502378	1.260301
59	0.27954611	9.09639450	2.54286170		59.00000000	0.58203390	5.29440995	1.281779
60	0.28937230	9.10252380	2.63401825		60.00000000	0.57233333	5.20967779	1.303164
61	0.29952443	9.10231020	2.72636427		61.00000000	0.56295082	5.12415299	1.324514
62	0.30932903	9.09165950	2.81231421		62.00000000	0.55387097	5.03560625	1.345888
63	0.31950945	9.10150240	2.90801603		63.00000000	0.54507937	4.96104115	1.367368
64	0.32929915	9.09669490	2.99553390		64.00000000	0.53656250	4.88094536	1.388745
65	0.33943939	9.10064130	3.08911613		65.00000000	0.52830769	4.80793880	1.410087
66	0.34928566	9.09730240	3.17755727		66.00000000	0.52030303	4.73335401	1.431468
67	0.35939464	9.08468530	3.26498720		67.00000000	0.51253731	4.65624020	1.452945
68	0.36959741	9.09807010	3.36262314		68.00000000	0.50500000	4.59452540	1.474322
69	0.37938413	9.08364870	3.44619216		69.00000000	0.49768116	4.52076082	1.495687
70	0.38952139	9.10022930	3.54473397		70.00000000	0.49057143	4.46431249	1.517043
71	0.39935279	9.08126740	3.62662947		71.00000000	0.48366197	4.39226370	1.538516
72	0.40952206	9.07994750	3.71843880		72.00000000	0.47694444	4.33063052	1.559910
73	0.41933557	9.08131410	3.80811802		73.00000000	0.47041096	4.27194967	1.581302
74	0.42946166	9.07256220	3.89631762		74.00000000	0.46405405	4.21015927	1.602653
75	0.43930942	9.09217360	3.99427751		75.00000000	0.45786667	4.16300322	1.624132
76	0.44945189	9.07053280	4.07676811		76.00000000	0.45184211	4.09844864	1.645504
77	0.45955345	9.06528570	4.16598332		77.00000000	0.44597403	4.04288196	1.666891
78	0.46947041	9.06458190	4.25555298		78.00000000	0.44025641	3.99074029	1.688366
79	0.47961959	9.07287790	4.35152998		79.00000000	0.43468354	3.94383072	1.709730
80	0.48940855	9.05251880	4.43038010		80.00000000	0.42925000	3.88579369	1.731087
81	0.49951902	9.03288080	4.51209576		81.00000000	0.42395062	3.82949539	1.752451
82	0.50937200	9.03520200	4.60227891		82.00000000	0.41878049	3.78376630	1.773926
83	0.51953083	8.99721620	4.67433120		83.00000000	0.41373494	3.72246270	1.795310
84	0.52929449	8.97302060	4.74937036		84.00000000	0.40880952	3.66825628	1.816653
85	0.53943104	8.92208860	4.81285153		85.00000000	0.40400000	3.60452379	1.838032
86	0.54958761	8.87493040	4.87755179		86.00000000	0.39930233	3.54378035	1.859559
87	0.55940336	8.79666900	4.92088620		87.00000000	0.39471264	3.47215648	1.880936
88	0.56951904	8.65519910	4.92930068		88.00000000	0.39022727	3.37749474	1.902299
89	0.57933480	8.49839210	4.92341429		89.00000000	0.38584270	3.27904252	1.923673
90	0.58949590	8.25994010	4.86920082		90.00000000	0.38155556	3.15162603	1.945162
91	0.59927595	7.94467310	4.76105152		91.00000000	0.37736264	2.99802279	1.966553
92	0.60939306	7.51001740	4.57655248		92.00000000	0.37326087	2.80319563	1.988015
93	0.61922598	6.93157530	4.29221151		93.00000000	0.36924731	2.55946555	2.009408
94	0.62928063	6.15187410	3.87125521		94.00000000	0.36531915	2.24739741	2.030892
95	0.63943130	5.13547800	3.28378537		95.00000000	0.36147368	1.85634015	2.052269
96	0.64920831	3.87152650	2.51342718		96.00000000	0.35770833	1.38487729	2.073678
97	0.65931362	2.25873260	1.48921317		97.00000000	0.35402062	0.79963791	2.095068
98	0.66903484	0.31937635	0.21367391		98.00000000	0.35040816	0.11191208	2.116557
99	0.67912221	-2.05231140	-1.39377025		99.00000000	0.34686869	-0.71188256	2.137937
100	0.68883675	-4.78516100	-3.29619475		100.00000000	0.34340000	-1.64322429	2.159347
101	0.69903135	-8.08918670	-5.65459510		101.00000000	0.34000000	-2.75032348	2.180718
01:43 04/04/2018
Test Lot:	JK-PERC
Recipe:	Recipe_YJX-LID
Cell Name:	3-18-5h
Test Order:	4
Test Condition:	Light
1	-0.29989377	9.10796830	-2.73142295		1.00000000	34.34000000	312.76763142	0.000000
2	-0.29009619	9.10057350	-2.64004170		2.00000000	17.17000000	156.25684700	0.061781
3	-0.27993464	9.09924320	-2.54719337		3.00000000	11.44666667	104.15600383	0.083207
4	-0.27013558	9.09378810	-2.45655572		4.00000000	8.58500000	78.07017084	0.104706
5	-0.25995991	9.10029790	-2.36571262		5.00000000	6.86800000	62.50084598	0.126072
6	-0.24975222	9.10043810	-2.27285462		6.00000000	5.72333333	52.08484073	0.147458
7	-0.23997995	9.10528470	-2.18508577		7.00000000	4.90571429	44.66792523	0.168869
8	-0.22982511	9.10903840	-2.09348575		8.00000000	4.29250000	39.10054733	0.190364
9	-0.22000445	9.08862970	-1.99953898		9.00000000	3.81555556	34.67817154	0.211752
10	-0.20988683	9.09781170	-1.90951086		10.00000000	3.43400000	31.24188538	0.233101
11	-0.20004906	9.10506150	-1.82145899		11.00000000	3.12181818	28.42434654	0.254473
12	-0.18990092	9.09614090	-1.72736553		12.00000000	2.86166667	26.03012321	0.275959
13	-0.18010558	9.09905820	-1.63879115		13.00000000	2.64153846	24.03551220	0.297345
14	-0.16996190	9.10878470	-1.54814635		14.00000000	2.45285714	22.34254761	0.318683
15	-0.16016506	9.09606460	-1.45687173		15.00000000	2.28933333	20.82392389	0.340056
16	-0.14998418	9.09797860	-1.36455286		16.00000000	2.14625000	19.52653657	0.361548
17	-0.13988888	9.10196880	-1.27326422		17.00000000	2.02000000	18.38597698	0.382934
18	-0.13005260	9.09679030	-1.18306123		18.00000000	1.90777778	17.35465438	0.404305
19	-0.11990372	9.09815220	-1.09090229		19.00000000	1.80736842	16.44371298	0.425669
20	-0.11011878	9.10795500	-1.00295689		20.00000000	1.71700000	15.63835874	0.447144
21	-0.09989548	9.09947680	-0.90899658		21.00000000	1.63523810	14.87981111	0.468515
22	-0.09014404	9.09647660	-0.81999313		22.00000000	1.56090909	14.19877302	0.489899
23	-0.07996539	9.10398010	-0.72800332		23.00000000	1.49304348	13.59263811	0.511254
24	-0.07013059	9.09582710	-0.63789569		24.00000000	1.43083333	13.01461261	0.532728
25	-0.06002785	9.09996800	-0.54625154		25.00000000	1.37360000	12.49971604	0.554101
26	-0.04985218	9.09587760	-0.45344934		26.00000000	1.32076923	12.01355526	0.575486
27	-0.04000994	9.09993740	-0.36408793		27.00000000	1.27185185	11.57377223	0.596966
28	-0.02987669	9.09807870	-0.27182046		28.00000000	1.22642857	11.15814366	0.618347
29	-0.02006645	9.09992120	-0.18260312		29.00000000	1.18413793	10.77556186	0.639709
30	-0.00988854	9.10294530	-0.09001487		30.00000000	1.14466667	10.41983805	0.661089
31	-0.00063204	9.09021280	-0.00574542		31.00000000	1.10774194	10.06960992	0.682688
32	0.00953598	9.10598090	0.08683443		32.00000000	1.07312500	9.77185575	0.704068
33	0.01935263	9.09184360	0.17595112		33.00000000	1.04060606	9.46102755	0.725429
34	0.02948932	9.09616950	0.26823983		34.00000000	1.01000000	9.18713120	0.746807
35	0.03929406	9.08771510	0.35709326		35.00000000	0.98114286	8.91634676	0.768292
36	0.04945754	9.09896470	0.45001244		36.00000000	0.95388889	8.67940133	0.789694
37	0.05926899	9.10225110	0.53948122		37.00000000	0.92810811	8.44787305	0.811054
38	0.06941609	9.09118080	0.63107423		38.00000000	0.90368421	8.21555654	0.832431
39	0.07956543	9.09293650	0.72348338		39.00000000	0.88051282	8.00644716	0.853907
40	0.08939473	9.10243420	0.81370967		40.00000000	0.85850000	7.81443976	0.875297
41	0.09950090	9.09627440	0.90508751		41.00000000	0.83756098	7.61868446	0.896671
42	0.10936519	9.08942030	0.99406618		42.00000000	0.81761905	7.43168317	0.918044
43	0.11953016	9.11181350	1.08913653		43.00000000	0.79860465	7.27673664	0.939527
44	0.12932895	9.10352230	1.17734898		44.00000000	0.78045455	7.10488536	0.960907
45	0.13945968	9.09189030	1.26795211		45.00000000	0.76311111	6.93812251	0.982262
46	0.14932621	9.09811020	1.35858631		46.00000000	0.74652174	6.79193705	1.003643
47	0.15944502	9.09427550	1.45003694		47.00000000	0.73063830	6.64462597	1.025130
48	0.16958915	9.10801700	1.54462086		48.00000000	0.71541667	6.51602716	1.046530
49	0.17939538	9.09185220	1.63103628		49.00000000	0.70081633	6.37171846	1.067893
50	0.18955737	9.10244270	1.72543510		50.00000000	0.68680000	6.25155765	1.089260
51	0.19933532	9.09804530	1.81356177		51.00000000	0.67333333	6.12601717	1.110736
52	0.20947498	9.09309010	1.90477487		52.00000000	0.66038462	6.00493681	1.132118
53	0.21932216	9.09577560	1.99490515		53.00000000	0.64792453	5.89337612	1.153507
54	0.22943799	9.10437390	2.08888925		54.00000000	0.63592593	5.78970740	1.174865
55	0.23925167	9.09315200	2.17555180		55.00000000	0.62436364	5.67743345	1.196379
56	0.24943152	9.10534000	2.27115880		56.00000000	0.61321429	5.58352456	1.217769
57	0.25955927	9.07932190	2.35662216		57.00000000	0.60245614	5.46989323	1.239153
58	0.26937816	9.10412500	2.45245244		58.00000000	0.59206897	5.39026987	1.260655
59	0.27953345	9.08703420	2.54013002		59.00000000	0.58203390	5.28896194	1.282039
60	0.28937617	9.09342580	2.63142073		60.00000000	0.57233333	5.20447070	1.303387
61	0.29950243	9.10258290	2.72624570		61.00000000	0.56295082	5.12430650	1.324760
62	0.30933917	9.09914020	2.81472048		62.00000000	0.55387097	5.03974959	1.346244
63	0.31944087	9.09366420	2.90488800		63.00000000	0.54507937	4.95676871	1.367622
64	0.32929325	9.09051700	2.99344589		64.00000000	0.53656250	4.87763053	1.388978
65	0.33941209	9.09109120	3.08562626		65.00000000	0.52830769	4.80289341	1.410370
66	0.34926075	9.09163190	3.17535018		66.00000000	0.52030303	4.73040363	1.431851
67	0.35941678	9.08621120	3.26573677		67.00000000	0.51253731	4.65702228	1.453239
68	0.36958918	9.09315010	3.36072989		68.00000000	0.50500000	4.59204080	1.474604
69	0.37939543	9.08337590	3.44619131		69.00000000	0.49768116	4.52062505	1.495977
70	0.38954177	9.10710910	3.54759940		70.00000000	0.49057143	4.46768752	1.517462
71	0.39937183	9.07920840	3.62598007		71.00000000	0.48366197	4.39126784	1.538846
72	0.40949288	9.09612080	3.72479670		72.00000000	0.47694444	4.33834428	1.560197
73	0.41937280	9.07822230	3.80715950		73.00000000	0.47041096	4.27049526	1.581577
74	0.42950428	9.06996820	3.89559016		74.00000000	0.46405405	4.20895551	1.603071
75	0.43933210	9.08768460	3.99251156		75.00000000	0.45786667	4.16094786	1.624454
76	0.44942412	9.07512660	4.07858079		76.00000000	0.45184211	4.10052431	1.645822
77	0.45960024	9.05801010	4.16306362		77.00000000	0.44597403	4.03963723	1.667198
78	0.46945858	9.08160500	4.26343739		78.00000000	0.44025641	3.99823482	1.688684
79	0.47958931	9.05640980	4.34335733		79.00000000	0.43468354	3.93667231	1.710081
80	0.48943126	9.05082230	4.42975536		80.00000000	0.42925000	3.88506547	1.731450
81	0.49955457	9.03394990	4.51295096		81.00000000	0.42395062	3.82994864	1.752823
82	0.50937569	9.03666880	4.60305941		82.00000000	0.41878049	3.78438057	1.774294
83	0.51950043	8.99204440	4.67137093		83.00000000	0.41373494	3.72032295	1.795668
84	0.52925014	8.97646900	4.75079747		84.00000000	0.40880952	3.66966602	1.817039
85	0.53944486	8.92830660	4.81632910		85.00000000	0.40400000	3.60703587	1.838387
86	0.54957485	8.86937810	4.87438714		86.00000000	0.39930233	3.54156330	1.859867
87	0.55939817	8.79353620	4.91908806		87.00000000	0.39471264	3.47091992	1.881312
88	0.56952226	8.65531060	4.92939205		88.00000000	0.39022727	3.37753825	1.902709
89	0.57934785	8.50655170	4.92825244		89.00000000	0.38584270	3.28219085	1.924193
90	0.58944881	8.25993820	4.86881074		90.00000000	0.38155556	3.15162531	1.945577
91	0.59925354	7.95899680	4.76945701		91.00000000	0.37736264	3.00342802	1.966923
92	0.60937387	7.51062680	4.57677972		92.00000000	0.37326087	2.80342309	1.988431
93	0.61920613	6.93960570	4.29704639		93.00000000	0.36924731	2.56243075	2.009955
94	0.62930411	6.14899400	3.86958720		94.00000000	0.36531915	2.24634525	2.031341
95	0.63943708	5.13713170	3.28487249		95.00000000	0.36147368	1.85693792	2.052692
96	0.64920312	3.86486580	2.50908294		96.00000000	0.35770833	1.38249470	2.074075
97	0.65931302	2.25396560	1.48606887		97.00000000	0.35402062	0.79795030	2.095573
98	0.66898900	0.32857317	0.21981184		98.00000000	0.35040816	0.11513472	2.116938
99	0.67913014	-2.06601910	-1.40309584		99.00000000	0.34686869	-0.71663733	2.138297
100	0.68884784	-4.79641870	-3.30400266		100.00000000	0.34340000	-1.64709018	2.159723
101	0.69908422	-8.13706300	-5.68849234		101.00000000	0.34000000	-2.76660142	2.181217
