# Supplementary material for: Study on the Electrical Injection Regeneration of Industrialized B-Doped Czochralski Silicon PERC Solar Cells
Source: Hindawi journal article supplement (doi:10.1155/2019/5357370), 2019-06-20
Supplement: f1 [file 5357370.f1.zip › section3.3/IVRawData_3-18-6h.csv]

02:44 04/04/2018
Test Lot:	JK-PERC
Recipe:	Recipe_YJX-LID
Cell Name:	3-18-6h
Test Order:	2
Test Condition:	Light
1	-0.29988143	9.09391500	-2.72709623		1.00000000	34.34000000	312.28504110	0.000000
2	-0.29009822	9.10551740	-2.64149439		2.00000000	17.17000000	156.34173376	0.061795
3	-0.27995032	9.10704610	-2.54952047		3.00000000	11.44666667	104.24532102	0.083233
4	-0.27015296	9.10113810	-2.45869940		4.00000000	8.58500000	78.13327059	0.104723
5	-0.25997081	9.11328410	-2.36918785		5.00000000	6.86800000	62.59003520	0.126103
6	-0.24982069	9.10623650	-2.27492629		6.00000000	5.72333333	52.11802690	0.147476
7	-0.24004790	9.11756320	-2.18865190		7.00000000	4.90571429	44.72816004	0.168827
8	-0.22986205	9.10048200	-2.09185545		8.00000000	4.29250000	39.06381899	0.190309
9	-0.22002824	9.11298080	-2.00511313		9.00000000	3.81555556	34.77108452	0.211689
10	-0.20989001	9.11213590	-1.91254630		10.00000000	3.43400000	31.29107468	0.233071
11	-0.20008968	9.10549740	-1.82191606		11.00000000	3.12181818	28.42570734	0.254420
12	-0.18991871	9.11524200	-1.73115500		12.00000000	2.86166667	26.08478419	0.275888
13	-0.18010126	9.11350820	-1.64135431		13.00000000	2.64153846	24.07368243	0.297270
14	-0.16995932	9.12682250	-1.55118855		14.00000000	2.45285714	22.38679176	0.318662
15	-0.16015825	9.10322380	-1.45795639		15.00000000	2.28933333	20.84031369	0.340144
16	-0.15000886	9.11243820	-1.36694647		16.00000000	2.14625000	19.55757049	0.361522
17	-0.13985501	9.10405830	-1.27324816		17.00000000	2.02000000	18.39019777	0.382877
18	-0.13003682	9.11605640	-1.18542299		18.00000000	1.90777778	17.39140982	0.404251
19	-0.11988594	9.11293410	-1.09251267		19.00000000	1.80736842	16.47042932	0.425716
20	-0.11006403	9.10801890	-1.00246527		20.00000000	1.71700000	15.63846845	0.447091
21	-0.09988935	9.10897350	-0.90988940		21.00000000	1.63523810	14.89534048	0.468430
22	-0.09008902	9.10375500	-0.82014833		22.00000000	1.56090909	14.21013394	0.489811
23	-0.07994632	9.13012500	-0.72991993		23.00000000	1.49304348	13.63167359	0.511290
24	-0.07012293	9.09300520	-0.63762814		24.00000000	1.43083333	13.01057494	0.532656
25	-0.05996163	9.12175560	-0.54695535		25.00000000	1.37360000	12.52964349	0.554020
26	-0.04983979	9.10701080	-0.45389148		26.00000000	1.32076923	12.02825965	0.575391
27	-0.04000299	9.11578270	-0.36465854		27.00000000	1.27185185	11.59392511	0.596864
28	-0.02985435	9.09813210	-0.27161878		28.00000000	1.22642857	11.15820915	0.618270
29	-0.02003541	9.11033540	-0.18252930		29.00000000	1.18413793	10.78789371	0.639613
30	-0.00991580	9.10988140	-0.09033172		30.00000000	1.14466667	10.42777758	0.660979
31	-0.00064389	9.10784050	-0.00586441		31.00000000	1.10774194	10.08913686	0.682590
32	0.00950678	9.11379810	0.08664287		32.00000000	1.07312500	9.78024459	0.703972
33	0.01933809	9.11551760	0.17627668		33.00000000	1.04060606	9.48566286	0.725313
34	0.02946337	9.11142160	0.26845317		34.00000000	1.01000000	9.20253582	0.746696
35	0.03928724	9.10767170	0.35781525		35.00000000	0.98114286	8.93592703	0.768177
36	0.04944452	9.10365770	0.45012594		36.00000000	0.95388889	8.68387793	0.789557
37	0.05924754	9.11003300	0.53974706		37.00000000	0.92810811	8.45509549	0.810922
38	0.06940706	9.10184380	0.63173223		38.00000000	0.90368421	8.22519253	0.832281
39	0.07956509	9.10598280	0.72451830		39.00000000	0.88051282	8.01793460	0.853784
40	0.08935695	9.10430240	0.81353270		40.00000000	0.85850000	7.81604361	0.875167
41	0.09949860	9.09917740	0.90535541		41.00000000	0.83756098	7.62111590	0.896554
42	0.10931130	9.10895350	0.99571155		42.00000000	0.81761905	7.44765389	0.917902
43	0.11946784	9.09490970	1.08654922		43.00000000	0.79860465	7.26323719	0.939383
44	0.12928277	9.11307720	1.17816386		44.00000000	0.78045455	7.11234252	0.960750
45	0.13943782	9.10136700	1.26907477		45.00000000	0.76311111	6.94535428	0.982146
46	0.14926392	9.10731120	1.35939297		46.00000000	0.74652174	6.79880580	1.003616
47	0.15942866	9.11176400	1.45267632		47.00000000	0.73063830	6.65740374	1.024988
48	0.16957700	9.09482100	1.54227246		48.00000000	0.71541667	6.50658652	1.046352
49	0.17942543	9.10212230	1.63315221		49.00000000	0.70081633	6.37891591	1.067725
50	0.18958494	9.11499020	1.72806487		50.00000000	0.68680000	6.26017527	1.089202
51	0.19933438	9.10725120	1.81538827		51.00000000	0.67333333	6.13221581	1.110599
52	0.20948571	9.09293170	1.90483925		52.00000000	0.66038462	6.00483220	1.131944
53	0.21930660	9.11224460	1.99837538		53.00000000	0.64792453	5.90404678	1.153325
54	0.22947133	9.10563760	2.08948277		54.00000000	0.63592593	5.79051102	1.174802
55	0.23925203	9.10045720	2.17730286		55.00000000	0.62436364	5.68199455	1.196175
56	0.24941452	9.09870620	2.26934944		56.00000000	0.61321429	5.57945662	1.217540
57	0.25959340	9.11811920	2.36700356		57.00000000	0.60245614	5.49326690	1.238906
58	0.26940757	9.10869120	2.45395036		58.00000000	0.59206897	5.39297338	1.260380
59	0.27954552	9.10572720	2.54546525		59.00000000	0.58203390	5.29984190	1.281765
60	0.28934780	9.11224650	2.63660848		60.00000000	0.57233333	5.21524241	1.303127
61	0.29949987	9.09594250	2.72423360		61.00000000	0.56295082	5.12056829	1.324496
62	0.30931702	9.11678220	2.81997590		62.00000000	0.55387097	5.04952098	1.345974
63	0.31947282	9.10535720	2.90891414		63.00000000	0.54507937	4.96314232	1.367350
64	0.32930487	9.11060910	3.00016795		64.00000000	0.53656250	4.88841120	1.388698
65	0.33941752	9.09930420	3.08846327		65.00000000	0.52830769	4.80723240	1.410081
66	0.34926593	9.11187930	3.18246900		66.00000000	0.52030303	4.74093841	1.431555
67	0.35938451	9.09414670	3.26829546		67.00000000	0.51253731	4.66108952	1.452939
68	0.36953807	9.11285210	3.36754578		68.00000000	0.50500000	4.60199031	1.474303
69	0.37936491	9.07957940	3.44447382		69.00000000	0.49768116	4.51873560	1.495669
70	0.38953635	9.10734460	3.54764177		70.00000000	0.49057143	4.46780305	1.517176
71	0.39933416	9.09953590	3.63375553		71.00000000	0.48366197	4.40109948	1.538552
72	0.40948996	9.11003490	3.73046783		72.00000000	0.47694444	4.34498053	1.559939
73	0.41931382	9.09028530	3.81168225		73.00000000	0.47041096	4.27616982	1.581298
74	0.42943612	9.09179020	3.90434311		74.00000000	0.46405405	4.21908210	1.602797
75	0.43928751	9.08013440	3.98878963		75.00000000	0.45786667	4.15749087	1.624186
76	0.44943586	9.09046170	4.08557947		76.00000000	0.45184211	4.10745335	1.645572
77	0.45958200	9.07991410	4.17296508		77.00000000	0.44597403	4.04940585	1.667051
78	0.46945125	9.09068870	4.26763517		78.00000000	0.44025641	4.00223397	1.688417
79	0.47956091	9.06431010	4.34688880		79.00000000	0.43468354	3.94010644	1.709768
80	0.48940113	9.05892940	4.43345028		80.00000000	0.42925000	3.88854544	1.731144
81	0.49952939	9.05191520	4.52169768		81.00000000	0.42395062	3.83756504	1.752616
82	0.50935102	9.03336330	4.60115281		82.00000000	0.41878049	3.78299629	1.773993
83	0.51950163	9.01568130	4.68366113		83.00000000	0.41373494	3.73010236	1.795344
84	0.52928752	8.97106650	4.74827354		84.00000000	0.40880952	3.66745742	1.816718
85	0.53942174	8.92932510	4.81667208		85.00000000	0.40400000	3.60744734	1.838202
86	0.54956561	8.86934280	4.87428579		86.00000000	0.39930233	3.54154921	1.859579
87	0.55934781	8.78603270	4.91444815		87.00000000	0.39471264	3.46795819	1.880933
88	0.56948203	8.64460850	4.92294920		88.00000000	0.39022727	3.37336200	1.902310
89	0.57929325	8.48692990	4.91642120		89.00000000	0.38584270	3.27461992	1.923783
90	0.58946615	8.24330230	4.85914767		90.00000000	0.38155556	3.14527779	1.945158
91	0.59922749	7.91548870	4.74317843		91.00000000	0.37736264	2.98700969	1.966501
92	0.60938030	7.47134640	4.55289131		92.00000000	0.37326087	2.78876125	1.987971
93	0.61917144	6.87456420	4.25653382		93.00000000	0.36924731	2.53841435	2.009484
94	0.62925577	6.08725600	3.83044096		94.00000000	0.36531915	2.22379118	2.030859
95	0.63937211	5.06234260	3.23672067		95.00000000	0.36147368	1.82990363	2.052264
96	0.64916402	3.80645230	2.47101188		96.00000000	0.35770833	1.36159971	2.073662
97	0.65929675	2.19407560	1.44654691		97.00000000	0.35402062	0.77674800	2.095143
98	0.66897619	0.32590380	0.21802188		98.00000000	0.35040816	0.11419935	2.116540
99	0.67912084	-2.00869890	-1.36414928		99.00000000	0.34686869	-0.69675475	2.137899
100	0.68882412	-4.62576060	-3.18633547		100.00000000	0.34340000	-1.58848619	2.159265
101	0.69905359	-7.80405570	-5.45545315		101.00000000	0.34000000	-2.65337894	2.180743
02:44 04/04/2018
Test Lot:	JK-PERC
Recipe:	Recipe_YJX-LID
Cell Name:	3-18-6h
Test Order:	3
Test Condition:	Light
1	-0.29990524	9.10441400	-2.73046147		1.00000000	34.34000000	312.64557676	0.000000
2	-0.29005653	9.11290070	-2.64325636		2.00000000	17.17000000	156.46850502	0.021592
3	-0.27993914	9.10455230	-2.54872054		3.00000000	11.44666667	104.21677533	0.042979
4	-0.27013361	9.10844800	-2.46049794		4.00000000	8.58500000	78.19602608	0.064385
5	-0.25999540	9.10580060	-2.36746627		5.00000000	6.86800000	62.53863852	0.085791
6	-0.24984451	9.11584760	-2.27754448		6.00000000	5.72333333	52.17303443	0.107278
7	-0.24003600	9.10530190	-2.18560025		7.00000000	4.90571429	44.66800961	0.128671
8	-0.22987843	9.10997680	-2.09418716		8.00000000	4.29250000	39.10457541	0.150024
9	-0.22003418	9.10021020	-2.00235729		9.00000000	3.81555556	34.72235759	0.171398
10	-0.20989893	9.10704230	-1.91155843		10.00000000	3.43400000	31.27358326	0.192870
11	-0.20007926	9.10601620	-1.82192498		11.00000000	3.12181818	28.42732694	0.214243
12	-0.18991128	9.11712650	-1.73144516		12.00000000	2.86166667	26.09017700	0.235581
13	-0.18012136	9.10246470	-1.63954832		13.00000000	2.64153846	24.04451060	0.256961
14	-0.16996454	9.10591410	-1.54768250		14.00000000	2.45285714	22.33550644	0.278476
15	-0.16016197	9.10380650	-1.45808358		15.00000000	2.28933333	20.84164768	0.299851
16	-0.15000662	9.11691280	-1.36759727		16.00000000	2.14625000	19.56717410	0.321233
17	-0.13984683	9.09998990	-1.27260474		17.00000000	2.02000000	18.38197960	0.342603
18	-0.13003831	9.11394020	-1.18516138		18.00000000	1.90777778	17.38737258	0.364093
19	-0.11991125	9.09897710	-1.09106972		19.00000000	1.80736842	16.44520387	0.385487
20	-0.11009008	9.10957620	-1.00287397		20.00000000	1.71700000	15.64114234	0.406863
21	-0.09990498	9.10679050	-0.90981370		21.00000000	1.63523810	14.89177075	0.428201
22	-0.09010539	9.11805440	-0.82158580		22.00000000	1.56090909	14.23245400	0.449690
23	-0.07995749	9.09623620	-0.72731224		23.00000000	1.49304348	13.58107614	0.471070
24	-0.07011772	9.11090950	-0.63883619		24.00000000	1.43083333	13.03619301	0.492452
25	-0.05997131	9.10662840	-0.54613640		25.00000000	1.37360000	12.50886477	0.513937
26	-0.04981076	9.11119840	-0.45383572		26.00000000	1.32076923	12.03379050	0.535307
27	-0.03999480	9.10190200	-0.36402874		27.00000000	1.27185185	11.57627091	0.556663
28	-0.02986923	9.11968800	-0.27239808		28.00000000	1.22642857	11.18464593	0.578045
29	-0.02003095	9.10274030	-0.18233650		29.00000000	1.18413793	10.77890007	0.599524
30	-0.00992324	9.10359290	-0.09033712		30.00000000	1.14466667	10.42057934	0.620906
31	-0.00062528	9.11170390	-0.00569736		31.00000000	1.10774194	10.09341651	0.642377
32	0.00950083	9.11724470	0.08662135		32.00000000	1.07312500	9.78394322	0.663756
33	0.01930609	9.09843440	0.17565516		33.00000000	1.04060606	9.46788598	0.685249
34	0.02944402	9.09339240	0.26774601		34.00000000	1.01000000	9.18432632	0.706628
35	0.03927682	9.11099820	0.35785100		35.00000000	0.98114286	8.93919081	0.727972
36	0.04943707	9.10325050	0.45003805		36.00000000	0.95388889	8.68348950	0.749373
37	0.05921926	9.10420230	0.53914415		37.00000000	0.92810811	8.44968397	0.770868
38	0.06937059	9.10134980	0.63136601		38.00000000	0.90368421	8.22474611	0.792246
39	0.07956434	9.09774680	0.72385622		39.00000000	0.88051282	8.01068270	0.813596
40	0.08938523	9.12694450	0.81581400		40.00000000	0.85850000	7.83548185	0.834975
41	0.09948818	9.10189720	0.90553122		41.00000000	0.83756098	7.62339390	0.856450
42	0.10932470	9.11861520	0.99688987		42.00000000	0.81761905	7.45555348	0.877828
43	0.11947826	9.10567760	1.08793052		43.00000000	0.79860465	7.27183648	0.899164
44	0.12928054	9.10060600	1.17653126		44.00000000	0.78045455	7.10260932	0.920537
45	0.13945197	9.10086920	1.26913414		45.00000000	0.76311111	6.94497441	0.942010
46	0.14929742	9.10442730	1.35926751		46.00000000	0.74652174	6.79665290	0.963390
47	0.15943386	9.09842780	1.45059746		47.00000000	0.73063830	6.64765980	0.984759
48	0.16959114	9.10962100	1.54491101		48.00000000	0.71541667	6.51717469	1.006132
49	0.17938599	9.10606480	1.63350045		49.00000000	0.70081633	6.38167888	1.027607
50	0.18954475	9.08965780	1.72289692		50.00000000	0.68680000	6.24277698	1.048985
51	0.19933289	9.10606100	1.81513746		51.00000000	0.67333333	6.13141441	1.070380
52	0.20947678	9.10091110	1.90642955		52.00000000	0.66038462	6.01010168	1.091732
53	0.21929023	9.09008980	1.99336788		53.00000000	0.64792453	5.88969215	1.113206
54	0.22945420	9.11702920	2.09194064		54.00000000	0.63592593	5.79775524	1.134586
55	0.23928031	9.09742160	2.17683386		55.00000000	0.62436364	5.68009923	1.155977
56	0.24941005	9.10245800	2.27024450		56.00000000	0.61321429	5.58175728	1.177455
57	0.25955170	9.10382180	2.36291242		57.00000000	0.60245614	5.48465334	1.198825
58	0.26940310	9.09405330	2.44996615		58.00000000	0.59206897	5.38430673	1.220189
59	0.27955294	9.10670190	2.54580529		59.00000000	0.58203390	5.30040921	1.241566
60	0.28936490	9.09735110	2.63245409		60.00000000	0.57233333	5.20671728	1.263043
61	0.29951102	9.10185430	2.72610567		61.00000000	0.56295082	5.12389634	1.284420
62	0.30930141	9.10548210	2.81633845		62.00000000	0.55387097	5.04326218	1.305770
63	0.31941774	9.10398670	2.90797486		63.00000000	0.54507937	4.96239529	1.327140
64	0.32927361	9.10105800	2.99673822		64.00000000	0.53656250	4.88328643	1.348624
65	0.33941603	9.10616110	3.09077705		65.00000000	0.52830769	4.81085496	1.370003
66	0.34921458	9.10914520	3.18104632		66.00000000	0.52030303	4.73951585	1.391361
67	0.35940906	9.09103110	3.26739894		67.00000000	0.51253731	4.65949266	1.412741
68	0.36953956	9.09740640	3.36185156		68.00000000	0.50500000	4.59419023	1.434219
69	0.37936193	9.10765360	3.45509705		69.00000000	0.49768116	4.53270760	1.455608
70	0.38952219	9.09274480	3.54182587		70.00000000	0.49057143	4.46064081	1.476960
71	0.39935201	9.09329220	3.63142452		71.00000000	0.48366197	4.39807964	1.498326
72	0.40946466	9.08867260	3.72149024		72.00000000	0.47694444	4.33479190	1.519809
73	0.41933092	9.09608650	3.81427032		73.00000000	0.47041096	4.27889877	1.541178
74	0.42945027	9.08529850	3.90168389		74.00000000	0.46405405	4.21606960	1.562531
75	0.43927264	9.09733100	3.99620861		75.00000000	0.45786667	4.16536462	1.583905
76	0.44943291	9.08457760	4.08290815		76.00000000	0.45184211	4.10479467	1.605389
77	0.45957083	9.08236600	4.17399048		77.00000000	0.44597403	4.05049933	1.626767
78	0.46945572	9.07327370	4.25950024		78.00000000	0.44025641	3.99456691	1.648143
79	0.47956613	9.07232570	4.35078013		79.00000000	0.43468354	3.94359069	1.669505
80	0.48938999	9.06227870	4.43498848		80.00000000	0.42925000	3.88998313	1.690970
81	0.49953237	9.04843900	4.51998818		81.00000000	0.42395062	3.83609130	1.712334
82	0.50937259	9.02415080	4.59665507		82.00000000	0.41878049	3.77913827	1.733718
83	0.51949865	9.03302000	4.69264170		83.00000000	0.41373494	3.73727599	1.755077
84	0.52925926	8.96678070	4.74575172		84.00000000	0.40880952	3.66570535	1.776553
85	0.53941578	8.94024470	4.82250907		85.00000000	0.40400000	3.61185886	1.797919
86	0.54955894	8.86423780	4.87142113		86.00000000	0.39930233	3.53951077	1.819314
87	0.55935973	8.78182980	4.91220195		87.00000000	0.39471264	3.46629926	1.840801
88	0.56951255	8.65942860	4.93165326		88.00000000	0.39022727	3.37914521	1.862172
89	0.57930738	8.49834730	4.92315531		89.00000000	0.38584270	3.27902524	1.883532
90	0.58943415	8.24321560	4.85883278		90.00000000	0.38155556	3.14524471	1.904912
91	0.59923196	7.93321750	4.75383747		91.00000000	0.37736264	2.99369988	1.926385
92	0.60937583	7.47175360	4.55310605		92.00000000	0.37326087	2.78891325	1.947774
93	0.61913127	6.90843490	4.27722807		93.00000000	0.36924731	2.55092102	1.969126
94	0.62928331	6.10247710	3.84018699		94.00000000	0.36531915	2.22935174	1.990596
95	0.63934755	5.08992480	3.25423095		95.00000000	0.36147368	1.83987387	2.012102
96	0.64919674	3.82043810	2.48021596		96.00000000	0.35770833	1.36660255	2.033493
97	0.65930194	2.20612980	1.45450566		97.00000000	0.35402062	0.78101544	2.054856
98	0.66898662	0.29569572	0.19781648		98.00000000	0.35040816	0.10361419	2.076276
99	0.67911565	-2.04156730	-1.38646030		99.00000000	0.34686869	-0.70815577	2.097775
100	0.68882710	-4.71384720	-3.24702570		100.00000000	0.34340000	-1.61873513	2.119168
101	0.69901717	-7.95496460	-5.56065684		101.00000000	0.34000000	-2.70468796	2.140529
02:45 04/04/2018
Test Lot:	JK-PERC
Recipe:	Recipe_YJX-LID
Cell Name:	3-18-6h
Test Order:	4
Test Condition:	Light
1	-0.29996738	9.11437420	-2.73401495		1.00000000	34.34000000	312.98761003	0.000000
2	-0.29012689	9.10010150	-2.64018415		2.00000000	17.17000000	156.24874276	0.061749
3	-0.27998570	9.10935880	-2.55049020		3.00000000	11.44666667	104.27179373	0.083222
4	-0.27015859	9.09973240	-2.45837087		4.00000000	8.58500000	78.12120265	0.104661
5	-0.26001218	9.09441380	-2.36465836		5.00000000	6.86800000	62.46043398	0.126035
6	-0.24984793	9.12580390	-2.28006321		6.00000000	5.72333333	52.23001765	0.147417
7	-0.24000743	9.09915350	-2.18386445		7.00000000	4.90571429	44.63784731	0.168935
8	-0.22989154	9.11458590	-2.09536619		8.00000000	4.29250000	39.12435998	0.190391
9	-0.22005922	9.09895130	-2.00230813		9.00000000	3.81555556	34.71755418	0.211760
10	-0.20991282	9.11542890	-1.91344539		10.00000000	3.43400000	31.30238284	0.233142
11	-0.20009911	9.11129670	-1.82316236		11.00000000	3.12181818	28.44381170	0.254633
12	-0.18997802	9.10794540	-1.73030943		12.00000000	2.86166667	26.06390375	0.276017
13	-0.18015091	9.10859780	-1.64092218		13.00000000	2.64153846	24.06071142	0.297353
14	-0.17000823	9.11108300	-1.54895909		14.00000000	2.45285714	22.34818502	0.318736
15	-0.16018112	9.10862260	-1.45902937		15.00000000	2.28933333	20.85267334	0.340210
16	-0.15001760	9.11367320	-1.36721138		16.00000000	2.14625000	19.56022111	0.361574
17	-0.13986601	9.11083890	-1.27429668		17.00000000	2.02000000	18.40389458	0.382942
18	-0.13006346	9.09638120	-1.18310681		18.00000000	1.90777778	17.35387391	0.404310
19	-0.11990738	9.11370280	-1.09280022		19.00000000	1.80736842	16.47181864	0.425791
20	-0.11008921	9.10560890	-1.00242929		20.00000000	1.71700000	15.63433048	0.447175
21	-0.09992867	9.11423020	-0.91077290		21.00000000	1.63523810	14.90393643	0.468519
22	-0.09012388	9.10331920	-0.82042648		22.00000000	1.56090909	14.20945370	0.489939
23	-0.07997228	9.09430030	-0.72729188		23.00000000	1.49304348	13.57818575	0.511414
24	-0.07013549	9.11190220	-0.63906772		24.00000000	1.43083333	13.03761340	0.532791
25	-0.05999951	9.10728930	-0.54643293		25.00000000	1.37360000	12.50977258	0.554155
26	-0.04983154	9.10489460	-0.45371088		26.00000000	1.32076923	12.02546464	0.575527
27	-0.04003047	9.08534620	-0.36369070		27.00000000	1.27185185	11.55521439	0.597006
28	-0.02986473	9.13488010	-0.27281070		28.00000000	1.22642857	11.20327795	0.618397
29	-0.02005771	9.10250000	-0.18257532		29.00000000	1.18413793	10.77861552	0.639748
30	-0.00990313	9.09413530	-0.09006039		30.00000000	1.14466667	10.40975354	0.661129
31	-0.00064388	9.10474780	-0.00586238		31.00000000	1.10774194	10.08571095	0.682714
32	0.00948668	9.10096930	0.08633795		32.00000000	1.07312500	9.76647768	0.704096
33	0.01929118	9.11138340	0.17576935		33.00000000	1.04060606	9.48136079	0.725473
34	0.02942240	9.10741140	0.26796192		34.00000000	1.01000000	9.19848551	0.746829
35	0.03926561	9.10494610	0.35751124		35.00000000	0.98114286	8.93325283	0.768320
36	0.04940427	9.10346600	0.44975010		36.00000000	0.95388889	8.68369507	0.789688
37	0.05923036	9.11224940	0.53972179		37.00000000	0.92810811	8.45715255	0.811070
38	0.06937944	9.10419560	0.63164400		38.00000000	0.90368421	8.22731781	0.832466
39	0.07952034	9.11345100	0.72470469		39.00000000	0.88051282	8.02451044	0.853926
40	0.08932409	9.09884170	0.81274579		40.00000000	0.85850000	7.81135560	0.875312
41	0.09946648	9.09418870	0.90456694		41.00000000	0.83756098	7.61693756	0.896670
42	0.10929926	9.10766790	0.99546136		42.00000000	0.81761905	7.44660275	0.918028
43	0.11945207	9.10129170	1.08716813		43.00000000	0.79860465	7.26833388	0.939521
44	0.12928784	9.11273480	1.17816580		44.00000000	0.78045455	7.11207530	0.960911
45	0.13945106	9.10925010	1.27029458		45.00000000	0.76311111	6.95136997	0.982286
46	0.14927566	9.10491940	1.35914285		46.00000000	0.74652174	6.79702027	1.003655
47	0.15941954	9.11033150	1.45236486		47.00000000	0.73063830	6.65635710	1.025143
48	0.16953735	9.11062720	1.54459159		48.00000000	0.71541667	6.51789454	1.046519
49	0.17940587	9.09410000	1.63153492		49.00000000	0.70081633	6.37329376	1.067900
50	0.18952295	9.10439870	1.72549250		50.00000000	0.68680000	6.25290103	1.089240
51	0.19931182	9.09680370	1.81310050		51.00000000	0.67333333	6.12518116	1.110726
52	0.20945123	9.10301210	1.90663708		52.00000000	0.66038462	6.01148914	1.132108
53	0.21928923	9.10717110	1.99710454		53.00000000	0.64792453	5.90075954	1.153490
54	0.22942118	9.10443210	2.08874956		54.00000000	0.63592593	5.78974441	1.174977
55	0.23923686	9.11292170	2.18014677		55.00000000	0.62436364	5.68977693	1.196344
56	0.24938743	9.08091070	2.26466498		56.00000000	0.61321429	5.56854417	1.217704
57	0.25955513	9.12261010	2.36782025		57.00000000	0.60245614	5.49597247	1.239088
58	0.26937154	9.10752770	2.45330876		58.00000000	0.59206897	5.39228450	1.260562
59	0.27952954	9.10255620	2.54443335		59.00000000	0.58203390	5.29799627	1.281952
60	0.28932959	9.09780980	2.63226558		60.00000000	0.57233333	5.20697981	1.303305
61	0.29949877	9.10168360	2.72594304		61.00000000	0.56295082	5.12380024	1.324666
62	0.30929360	9.09834580	2.81406013		62.00000000	0.55387097	5.03930959	1.346150
63	0.31944489	9.10401150	2.90822995		63.00000000	0.54507937	4.96240881	1.367536
64	0.32923898	9.10126500	2.99649121		64.00000000	0.53656250	4.88339750	1.388877
65	0.33940145	9.10394190	3.08989108		65.00000000	0.52830769	4.80968254	1.410259
66	0.34922755	9.08883090	3.17407015		66.00000000	0.52030303	4.72894626	1.431753
67	0.35939226	9.10273840	3.27145373		67.00000000	0.51253731	4.66549308	1.453150
68	0.36953166	9.09185220	3.35972724		68.00000000	0.50500000	4.59138536	1.474504
69	0.37932798	9.10579200	3.45408169		69.00000000	0.49768116	4.53178112	1.495873
70	0.38950536	9.10569380	3.54671654		70.00000000	0.49057143	4.46699322	1.517355
71	0.39929944	9.09312340	3.63087908		71.00000000	0.48366197	4.39799799	1.538725
72	0.40947682	9.10362630	3.72772395		72.00000000	0.47694444	4.34192399	1.560066
73	0.41929695	9.08737560	3.81030887		73.00000000	0.47041096	4.27480107	1.581441
74	0.42945272	9.09976580	3.90791917		74.00000000	0.46405405	4.22278321	1.602917
75	0.43927285	9.09738250	3.99623314		75.00000000	0.45786667	4.16538820	1.624316
76	0.44939068	9.08088400	4.08086464		76.00000000	0.45184211	4.10312574	1.645689
77	0.45954868	9.08592410	4.17542443		77.00000000	0.44597403	4.05208615	1.667054
78	0.46939042	9.06588550	4.25543980		78.00000000	0.44025641	3.99131421	1.688542
79	0.47954619	9.08035850	4.35445132		79.00000000	0.43468354	3.94708242	1.709921
80	0.48936185	9.05299660	4.43019116		80.00000000	0.42925000	3.88599879	1.731298
81	0.49950424	9.05216500	4.52159480		81.00000000	0.42395062	3.83767094	1.752661
82	0.50933927	9.02869700	4.59866994		82.00000000	0.41878049	3.78104213	1.774134
83	0.51948535	9.01631360	4.68384283		83.00000000	0.41373494	3.73036396	1.795501
84	0.52922660	8.98411850	4.75463449		84.00000000	0.40880952	3.67279321	1.816891
85	0.53937572	8.92828370	4.81569945		85.00000000	0.40400000	3.60702661	1.838367
86	0.54954785	8.86853500	4.87368434		86.00000000	0.39930233	3.54122665	1.859739
87	0.55935907	8.78257080	4.91261063		87.00000000	0.39471264	3.46659174	1.881118
88	0.56949323	8.65494440	4.92893224		88.00000000	0.39022727	3.37739535	1.902497
89	0.57928437	8.49572180	4.92143885		89.00000000	0.38584270	3.27801221	1.923992
90	0.58942449	8.24083230	4.85734838		90.00000000	0.38155556	3.14433535	1.945379
91	0.59923571	7.93631940	4.75572599		91.00000000	0.37736264	2.99487042	1.966730
92	0.60933197	7.47763300	4.55636085		92.00000000	0.37326087	2.79110780	1.988238
93	0.61914313	6.90708160	4.27647212		93.00000000	0.36924731	2.55042131	2.009749
94	0.62924981	6.10449030	3.84124936		94.00000000	0.36531915	2.23008720	2.031135
95	0.63938254	5.08509490	3.25132089		95.00000000	0.36147368	1.83812799	2.052494
96	0.64918035	3.82098650	2.48050935		96.00000000	0.35770833	1.36679871	2.073862
97	0.65925276	2.20519590	1.45378148		97.00000000	0.35402062	0.78068482	2.095340
98	0.66895384	0.30559382	0.20442816		98.00000000	0.35040816	0.10708257	2.116736
99	0.67907017	-2.03897550	-1.38460744		99.00000000	0.34686869	-0.70725675	2.138082
100	0.68879354	-4.71086690	-3.24481469		100.00000000	0.34340000	-1.61771169	2.159454
101	0.69898504	-7.93507580	-5.54649928		101.00000000	0.34000000	-2.69792577	2.180975
