# Supplementary material for: Study on the Electrical Injection Regeneration of Industrialized B-Doped Czochralski Silicon PERC Solar Cells
Source: Hindawi journal article supplement (doi:10.1155/2019/5357370), 2019-06-20
Supplement: f1 [file 5357370.f1.zip › section3.3/IVRawData_3-18-7h.csv]

03:46 04/04/2018
Test Lot:	JK-PERC
Recipe:	Recipe_YJX-LID
Cell Name:	3-18-7h
Test Order:	2
Test Condition:	Light
1	-0.29995954	9.11182500	-2.73317884		1.00000000	34.34000000	312.90007050	0.000000
2	-0.29013315	9.09673600	-2.63926467		2.00000000	17.17000000	156.19095712	0.061798
3	-0.27997851	9.10480020	-2.54914839		3.00000000	11.44666667	104.21961296	0.083224
4	-0.27020347	9.09723850	-2.45810541		4.00000000	8.58500000	78.09979252	0.104712
5	-0.26003098	9.10088830	-2.36651290		5.00000000	6.86800000	62.50490084	0.126145
6	-0.24983618	9.09468360	-2.27218101		6.00000000	5.72333333	52.05190580	0.147512
7	-0.24001275	9.10039420	-2.18421064		7.00000000	4.90571429	44.64393383	0.168888
8	-0.22986856	9.10580160	-2.09313750		8.00000000	4.29250000	39.08665337	0.190374
9	-0.22002652	9.09545990	-2.00124239		9.00000000	3.81555556	34.70423255	0.211747
10	-0.20989573	9.09963320	-1.90997415		10.00000000	3.43400000	31.24814041	0.233090
11	-0.20005816	9.10875610	-1.82228099		11.00000000	3.12181818	28.43588041	0.254461
12	-0.18995191	9.09421160	-1.72746286		12.00000000	2.86166667	26.02460220	0.275927
13	-0.18011807	9.10490890	-1.63995862		13.00000000	2.64153846	24.05096705	0.297305
14	-0.16998950	9.09538270	-1.54611956		14.00000000	2.45285714	22.30967442	0.318661
15	-0.16019733	9.09663300	-1.45725632		15.00000000	2.28933333	20.82522515	0.340037
16	-0.15005536	9.10633950	-1.36645505		16.00000000	2.14625000	19.54448115	0.361519
17	-0.13991787	9.10122390	-1.27342386		17.00000000	2.02000000	18.38447228	0.382912
18	-0.13005425	9.10671620	-1.18436715		18.00000000	1.90777778	17.37359079	0.404322
19	-0.11994205	9.09809970	-1.09124473		19.00000000	1.80736842	16.44361809	0.425693
20	-0.11011640	9.09447000	-1.00145030		20.00000000	1.71700000	15.61520499	0.447178
21	-0.09993424	9.11174960	-0.91057580		21.00000000	1.63523810	14.89988006	0.468541
22	-0.09015845	9.09125230	-0.81965320		22.00000000	1.56090909	14.19061836	0.489928
23	-0.07999565	9.10539150	-0.72839168		23.00000000	1.49304348	13.59474540	0.511278
24	-0.07017594	9.10219000	-0.63875472		24.00000000	1.43083333	13.02371686	0.532748
25	-0.06006449	9.10310170	-0.54677313		25.00000000	1.37360000	12.50402050	0.554128
26	-0.04989647	9.09561820	-0.45383925		26.00000000	1.32076923	12.01321265	0.575508
27	-0.04005221	9.09777070	-0.36438581		27.00000000	1.27185185	11.57101651	0.596978
28	-0.02990652	9.11703010	-0.27265865		28.00000000	1.22642857	11.18138620	0.618377
29	-0.02010319	9.09337520	-0.18280585		29.00000000	1.18413793	10.76781050	0.639719
30	-0.00996420	9.09714030	-0.09064573		30.00000000	1.14466667	10.41319326	0.661089
31	-0.00066175	9.10718060	-0.00602672		31.00000000	1.10774194	10.08840586	0.682680
32	0.00946810	9.09541990	0.08611632		32.00000000	1.07312500	9.76052248	0.704056
33	0.01927785	9.10127070	0.17545289		33.00000000	1.04060606	9.47083745	0.725415
34	0.02944036	9.10151580	0.26795192		34.00000000	1.01000000	9.19253096	0.746785
35	0.03924639	9.09771920	0.35705262		35.00000000	0.98114286	8.92616221	0.768264
36	0.04940593	9.10815330	0.44999678		36.00000000	0.95388889	8.68816623	0.789649
37	0.05920377	9.10231210	0.53889119		37.00000000	0.92810811	8.44792966	0.811004
38	0.06936331	9.10031130	0.63122772		38.00000000	0.90368421	8.22380763	0.832376
39	0.07951392	9.08751390	0.72258381		39.00000000	0.88051282	8.00167250	0.853861
40	0.08933409	9.10358050	0.81326004		40.00000000	0.85850000	7.81542386	0.875251
41	0.09951744	9.09832000	0.90544153		41.00000000	0.83756098	7.62039778	0.896599
42	0.10931230	9.10800170	0.99561661		42.00000000	0.81761905	7.44687568	0.917977
43	0.11945770	9.10778140	1.08799462		43.00000000	0.79860465	7.27351659	0.939448
44	0.12926298	9.09982200	1.17627011		44.00000000	0.78045455	7.10199744	0.960816
45	0.13942625	9.10424140	1.26937024		45.00000000	0.76311111	6.94754777	0.982170
46	0.14927097	9.10573480	1.35922187		46.00000000	0.74652174	6.79762898	1.003545
47	0.15940669	9.10363200	1.45117984		47.00000000	0.73063830	6.65146219	1.025064
48	0.16958782	9.09884070	1.54305256		48.00000000	0.71541667	6.50946228	1.046434
49	0.17937152	9.10751720	1.63362920		49.00000000	0.70081633	6.38269675	1.067793
50	0.18951319	9.10558320	1.72562812		50.00000000	0.68680000	6.25371454	1.089156
51	0.19929020	9.09390070	1.81232529		51.00000000	0.67333333	6.12322647	1.110625
52	0.20943858	9.11736200	1.90952735		52.00000000	0.66038462	6.02096560	1.131996
53	0.21926694	9.09864230	1.99503146		53.00000000	0.64792453	5.89523352	1.153391
54	0.22941233	9.11623570	2.09137687		54.00000000	0.63592593	5.79725063	1.174735
55	0.23921537	9.09776590	2.17632544		55.00000000	0.62436364	5.68031420	1.196204
56	0.24934812	9.10719390	2.27086168		56.00000000	0.61321429	5.58466140	1.217583
57	0.25952405	9.09295460	2.35984040		57.00000000	0.60245614	5.47810633	1.238956
58	0.26936132	9.10695360	2.45306104		58.00000000	0.59206897	5.39194460	1.260485
59	0.27946132	9.09372230	2.54134364		59.00000000	0.58203390	5.29285464	1.281887
60	0.28929859	9.11010740	2.63554123		60.00000000	0.57233333	5.21401814	1.303264
61	0.29943880	9.09886550	2.72455337		61.00000000	0.56295082	5.12221379	1.324624
62	0.30927980	9.10496710	2.81598240		62.00000000	0.55387097	5.04297694	1.346119
63	0.31941777	9.09916110	2.90643375		63.00000000	0.54507937	4.95976496	1.367506
64	0.32926250	9.09423160	2.99438943		64.00000000	0.53656250	4.87962364	1.388872
65	0.33937961	9.09940340	3.08815198		65.00000000	0.52830769	4.80728481	1.410249
66	0.34918416	9.09044460	3.17423926		66.00000000	0.52030303	4.72978587	1.431726
67	0.35935336	9.10130210	3.27058349		67.00000000	0.51253731	4.66475693	1.453112
68	0.36951289	9.09206010	3.35963340		68.00000000	0.50500000	4.59149035	1.474458
69	0.37935391	9.09681320	3.45091166		69.00000000	0.49768116	4.52731254	1.495825
70	0.38950080	9.09061620	3.54080228		70.00000000	0.49057143	4.45959658	1.517303
71	0.39931276	9.09521960	3.63183724		71.00000000	0.48366197	4.39901185	1.538675
72	0.40946189	9.09437660	3.72380063		72.00000000	0.47694444	4.33751240	1.560024
73	0.41930664	9.09021760	3.81158860		73.00000000	0.47041096	4.27613798	1.581408
74	0.42945278	9.08771230	3.90274331		74.00000000	0.46405405	4.21718973	1.602883
75	0.43924615	9.08137420	3.98895865		75.00000000	0.45786667	4.15805853	1.624269
76	0.44940045	9.08782580	4.08407300		76.00000000	0.45184211	4.10626234	1.645627
77	0.45955479	9.08129690	4.17335349		77.00000000	0.44597403	4.05002254	1.666999
78	0.46940920	9.06969170	4.25739673		78.00000000	0.44025641	3.99298991	1.688462
79	0.47954789	9.07213690	4.35052411		79.00000000	0.43468354	3.94350862	1.709829
80	0.48932639	9.05289270	4.42981930		80.00000000	0.42925000	3.88595419	1.731188
81	0.49948519	9.04938600	4.52003429		81.00000000	0.42395062	3.83649278	1.752563
82	0.50930017	9.02269170	4.59525842		82.00000000	0.41878049	3.77852723	1.774036
83	0.51947755	9.01276870	4.68193100		83.00000000	0.41373494	3.72889732	1.795405
84	0.52924711	8.98556330	4.75558341		84.00000000	0.40880952	3.67338385	1.816805
85	0.53938133	8.93675800	4.82032042		85.00000000	0.40400000	3.61045023	1.838140
86	0.54954755	8.87018010	4.87458574		86.00000000	0.39930233	3.54188354	1.859604
87	0.55936778	8.79257110	4.91828098		87.00000000	0.39471264	3.47053898	1.880987
88	0.56947070	8.65800190	4.93047840		88.00000000	0.39022727	3.37858847	1.902368
89	0.57925665	8.50655650	4.92747942		89.00000000	0.38584270	3.28219270	1.923846
90	0.58942068	8.26139830	4.86943900		90.00000000	0.38155556	3.15218242	1.945239
91	0.59923786	7.94188400	4.75907757		91.00000000	0.37736264	2.99697029	1.966706
92	0.60931033	7.50934360	4.57552063		92.00000000	0.37326087	2.80294412	1.988114
93	0.61915505	6.93131690	4.29155986		93.00000000	0.36924731	2.55937013	2.009614
94	0.62922752	6.14221380	3.86484996		94.00000000	0.36531915	2.24386832	2.030998
95	0.63934833	5.12240080	3.27499840		95.00000000	0.36147368	1.85161309	2.052360
96	0.64913207	3.85497900	2.50239050		96.00000000	0.35770833	1.37895811	2.073718
97	0.65923947	2.22892280	1.46939389		97.00000000	0.35402062	0.78908463	2.095189
98	0.66891825	0.29018426	0.19410955		98.00000000	0.35040816	0.10168293	2.116619
99	0.67904651	-2.10905720	-1.43214793		99.00000000	0.34686869	-0.73156590	2.137975
100	0.68877220	-4.84704110	-3.33850716		100.00000000	0.34340000	-1.66447391	2.159354
101	0.69897938	-8.17505650	-5.71419592		101.00000000	0.34000000	-2.77951921	2.180841
03:47 04/04/2018
Test Lot:	JK-PERC
Recipe:	Recipe_YJX-LID
Cell Name:	3-18-7h
Test Order:	3
Test Condition:	Light
1	-0.29994377	9.12597660	-2.73727983		1.00000000	34.34000000	313.38603644	0.000000
2	-0.29015908	9.11122510	-2.64370469		2.00000000	17.17000000	156.43973497	0.061775
3	-0.28003943	9.09622670	-2.54730214		3.00000000	11.44666667	104.12147496	0.083238
4	-0.27014232	9.11153030	-2.46140993		4.00000000	8.58500000	78.22248763	0.104728
5	-0.25999442	9.10468960	-2.36716849		5.00000000	6.86800000	62.53100817	0.126111
6	-0.24986361	9.10763360	-2.27566621		6.00000000	5.72333333	52.12602297	0.147471
7	-0.23997991	9.10095790	-2.18404706		7.00000000	4.90571429	44.64669918	0.168842
8	-0.22986995	9.10696600	-2.09341782		8.00000000	4.29250000	39.09165156	0.190322
9	-0.22004132	9.11181070	-2.00497485		9.00000000	3.81555556	34.76661994	0.211696
10	-0.20988670	9.11323450	-1.91274672		10.00000000	3.43400000	31.29484727	0.233076
11	-0.20008039	9.10352610	-1.82143705		11.00000000	3.12181818	28.41955330	0.254418
12	-0.18994737	9.10677720	-1.72980838		12.00000000	2.86166667	26.06056075	0.275883
13	-0.18013139	9.11287400	-1.64151466		13.00000000	2.64153846	24.07200717	0.297272
14	-0.16995296	9.10563280	-1.54752925		14.00000000	2.45285714	22.33481645	0.318648
15	-0.16017270	9.10000130	-1.45757178		15.00000000	2.28933333	20.83293631	0.340126
16	-0.15002033	9.11094670	-1.36682723		16.00000000	2.14625000	19.55436935	0.361522
17	-0.13985679	9.10021020	-1.27272619		17.00000000	2.02000000	18.38242460	0.382869
18	-0.13005717	9.10107610	-1.18366020		18.00000000	1.90777778	17.36283074	0.404246
19	-0.11993010	9.10103990	-1.09148863		19.00000000	1.80736842	16.44893211	0.425719
20	-0.11011337	9.10542200	-1.00262870		20.00000000	1.71700000	15.63400957	0.447082
21	-0.09992080	9.09654900	-0.90893447		21.00000000	1.63523810	14.87502346	0.468440
22	-0.09012418	9.10391040	-0.82048241		22.00000000	1.56090909	14.21037651	0.489811
23	-0.07999189	9.10264020	-0.72813741		23.00000000	1.49304348	13.59063759	0.511293
24	-0.07018484	9.09944920	-0.63864340		24.00000000	1.43083333	13.01979523	0.532673
25	-0.06002799	9.10237120	-0.54639708		25.00000000	1.37360000	12.50301708	0.554019
26	-0.04985477	9.10067940	-0.45371231		26.00000000	1.32076923	12.01989733	0.575397
27	-0.04006187	9.09905340	-0.36452505		27.00000000	1.27185185	11.57264792	0.596873
28	-0.02991693	9.09644220	-0.27213760		28.00000000	1.22642857	11.15613661	0.618251
29	-0.02009499	9.11342140	-0.18313415		29.00000000	1.18413793	10.79154796	0.639602
30	-0.00991135	9.10605340	-0.09025332		30.00000000	1.14466667	10.42339579	0.660974
31	-0.00067962	9.11222840	-0.00619281		31.00000000	1.10774194	10.09399752	0.682560
32	0.00946958	9.10175900	0.08618986		32.00000000	1.07312500	9.76732513	0.703947
33	0.01929570	9.10201740	0.17562980		33.00000000	1.04060606	9.47161447	0.725293
34	0.02944407	9.09808250	0.26788460		34.00000000	1.01000000	9.18906333	0.746662
35	0.03926275	9.09607320	0.35713681		35.00000000	0.98114286	8.92454725	0.768146
36	0.04941037	9.11090280	0.45017311		36.00000000	0.95388889	8.69078895	0.789512
37	0.05924765	9.10612300	0.53951642		37.00000000	0.92810811	8.45146659	0.810870
38	0.06940123	9.09457780	0.63117492		38.00000000	0.90368421	8.21862636	0.832250
39	0.07952654	9.11913590	0.72521329		39.00000000	0.88051282	8.02951607	0.853725
40	0.08936605	9.09560590	0.81283836		40.00000000	0.85850000	7.80857767	0.875112
41	0.09951814	9.09605310	0.90522231		41.00000000	0.83756098	7.61849911	0.896496
42	0.10929291	9.09450440	0.99396485		42.00000000	0.81761905	7.43584003	0.917841
43	0.11949189	9.10634040	1.08813383		43.00000000	0.79860465	7.27236580	0.939310
44	0.12930684	9.10721970	1.17762580		44.00000000	0.78045455	7.10777101	0.960685
45	0.13942917	9.09066580	1.26750399		45.00000000	0.76311111	6.93718808	0.982063
46	0.14924933	9.10857680	1.35944898		46.00000000	0.74652174	6.79975059	1.003542
47	0.15941185	9.10183430	1.45094024		47.00000000	0.73063830	6.65014872	1.024923
48	0.16955203	9.10119820	1.54312663		48.00000000	0.71541667	6.51114888	1.046271
49	0.17938857	9.09464260	1.63147493		49.00000000	0.70081633	6.37367402	1.067647
50	0.18954661	9.08822730	1.72264268		50.00000000	0.68680000	6.24179451	1.089131
51	0.19931096	9.09729100	1.81318980		51.00000000	0.67333333	6.12550927	1.110517
52	0.20944667	9.09332080	1.90456576		52.00000000	0.66038462	6.00508916	1.131873
53	0.21930182	9.10544870	1.99684147		53.00000000	0.64792453	5.89964355	1.153248
54	0.22942637	9.09399700	2.08640272		54.00000000	0.63592593	5.78310846	1.174718
55	0.23925249	9.10463810	2.17830734		55.00000000	0.62436364	5.68460495	1.196110
56	0.24940236	9.10528850	2.27088044		56.00000000	0.61321429	5.58349298	1.217454
57	0.25952765	9.09968090	2.36161880		57.00000000	0.60245614	5.48215863	1.238826
58	0.26937461	9.09496970	2.44995392		58.00000000	0.59206897	5.38484930	1.260299
59	0.27952448	9.10989480	2.54643861		59.00000000	0.58203390	5.30226758	1.281676
60	0.28933644	9.09230330	2.63073467		60.00000000	0.57233333	5.20382826	1.303036
61	0.29944760	9.09767820	2.72427790		61.00000000	0.56295082	5.12154540	1.324431
62	0.30929381	9.09994320	2.81455610		62.00000000	0.55387097	5.04019435	1.345910
63	0.31942880	9.09297560	2.90455828		63.00000000	0.54507937	4.95639337	1.367304
64	0.32924598	9.10837940	2.99889730		64.00000000	0.53656250	4.88721482	1.388642
65	0.33940551	9.07945540	3.08161719		65.00000000	0.52830769	4.79674613	1.410008
66	0.34923685	9.10575100	3.18006380		66.00000000	0.52030303	4.73774984	1.431503
67	0.35939264	9.09173200	3.26750157		67.00000000	0.51253731	4.65985189	1.452881
68	0.36951125	9.10151670	3.36311281		68.00000000	0.50500000	4.59626593	1.474242
69	0.37933215	9.08833600	3.44749803		69.00000000	0.49768116	4.52309360	1.495611
70	0.38949245	9.08996300	3.54047196		70.00000000	0.49057143	4.45927613	1.517085
71	0.39933270	9.09083750	3.63026868		71.00000000	0.48366197	4.39689239	1.538459
72	0.40945503	9.09000300	3.72194745		72.00000000	0.47694444	4.33542643	1.559829
73	0.41929305	9.08683400	3.81004634		73.00000000	0.47041096	4.27454630	1.581174
74	0.42945629	9.07652850	3.89797226		74.00000000	0.46405405	4.21199985	1.602647
75	0.43927649	9.09381680	3.99469992		75.00000000	0.45786667	4.16375559	1.624027
76	0.44945684	9.07777690	4.08006892		76.00000000	0.45184211	4.10172183	1.645410
77	0.45955163	9.07932850	4.17242021		77.00000000	0.44597403	4.04914468	1.666902
78	0.46944249	9.06133940	4.25377773		78.00000000	0.44025641	3.98931276	1.688284
79	0.47955960	9.06700230	4.34816800		79.00000000	0.43468354	3.94127670	1.709687
80	0.48938349	9.06511310	4.43631669		80.00000000	0.42925000	3.89119980	1.731081
81	0.49952367	9.04272940	4.51705738		81.00000000	0.42395062	3.83367071	1.752570
82	0.50933415	9.02378270	4.59612069		82.00000000	0.41878049	3.77898412	1.773950
83	0.51947361	9.00774770	4.67928722		83.00000000	0.41373494	3.72681995	1.795320
84	0.52925283	8.97157380	4.74823082		84.00000000	0.40880952	3.66766481	1.816697
85	0.53939301	8.93675040	4.82042070		85.00000000	0.40400000	3.61044716	1.838171
86	0.54954362	8.86758610	4.87312537		86.00000000	0.39930233	3.54084775	1.859557
87	0.55936974	8.78594970	4.91459440		87.00000000	0.39471264	3.46792543	1.880909
88	0.56946528	8.66433810	4.93403972		88.00000000	0.39022727	3.38106103	1.902294
89	0.57928026	8.49124050	4.91880800		89.00000000	0.38584270	3.27628313	1.923776
90	0.58943081	8.24678520	4.86090928		90.00000000	0.38155556	3.14660671	1.945154
91	0.59922123	7.92901130	4.75123190		91.00000000	0.37736264	2.99211262	1.966517
92	0.60934651	7.47060010	4.55218410		92.00000000	0.37326087	2.78848269	1.987990
93	0.61913615	6.90334560	4.27411082		93.00000000	0.36924731	2.54904181	2.009497
94	0.62921536	6.10436250	3.84095865		94.00000000	0.36531915	2.23004051	2.030886
95	0.63938975	5.09279870	3.25628329		95.00000000	0.36147368	1.84091271	2.052228
96	0.64913845	3.81640200	2.47737328		96.00000000	0.35770833	1.36515880	2.073626
97	0.65926898	2.19982770	1.45027816		97.00000000	0.35402062	0.77878436	2.095130
98	0.66899019	0.28134993	0.18822034		98.00000000	0.35040816	0.09858731	2.116511
99	0.67911547	-2.08527870	-1.41614502		99.00000000	0.34686869	-0.72331788	2.137905
100	0.68880761	-4.78191660	-3.29382054		100.00000000	0.34340000	-1.64211016	2.159280
101	0.69904381	-8.05881210	-5.63346271		101.00000000	0.34000000	-2.73999611	2.180756
03:47 04/04/2018
Test Lot:	JK-PERC
Recipe:	Recipe_YJX-LID
Cell Name:	3-18-7h
Test Order:	4
Test Condition:	Light
1	-0.29991472	9.10056110	-2.72939223		1.00000000	34.34000000	312.51326817	0.000000
2	-0.29008836	9.10870360	-2.64232889		2.00000000	17.17000000	156.39644081	0.061813
3	-0.27998808	9.11020370	-2.55074844		3.00000000	11.44666667	104.28146502	0.083252
4	-0.27014014	9.07544040	-2.45164074		4.00000000	8.58500000	77.91265583	0.104752
5	-0.25998184	9.11175250	-2.36889018		5.00000000	6.86800000	62.57951617	0.126119
6	-0.24980491	9.09624390	-2.27228639		6.00000000	5.72333333	52.06083592	0.147497
7	-0.23995398	9.10739710	-2.18535618		7.00000000	4.90571429	44.67828806	0.168874
8	-0.22982916	9.09096340	-2.08936848		8.00000000	4.29250000	39.02296039	0.190352
9	-0.22003256	9.10199640	-2.00273557		9.00000000	3.81555556	34.72917293	0.211742
10	-0.20986383	9.10553460	-1.91092237		10.00000000	3.43400000	31.26840582	0.233086
11	-0.19998983	9.09672450	-1.81925239		11.00000000	3.12181818	28.39831994	0.254452
12	-0.18989031	9.09235480	-1.72655007		12.00000000	2.86166667	26.01928865	0.275945
13	-0.18009147	9.11615560	-1.64174186		13.00000000	2.64153846	24.08067564	0.297332
14	-0.16993243	9.08887000	-1.54449377		14.00000000	2.45285714	22.29369970	0.318722
15	-0.16012615	9.11061100	-1.45884706		15.00000000	2.28933333	20.85722545	0.340079
16	-0.14997379	9.08143710	-1.36197754		16.00000000	2.14625000	19.49103438	0.361550
17	-0.13981846	9.10280230	-1.27273980		17.00000000	2.02000000	18.38766065	0.382939
18	-0.13001440	9.11039260	-1.18448223		18.00000000	1.90777778	17.38060455	0.404313
19	-0.11987545	9.09166240	-1.08986712		19.00000000	1.80736842	16.43198352	0.425727
20	-0.11003494	9.09750370	-1.00104327		20.00000000	1.71700000	15.62041385	0.447188
21	-0.09987291	9.10591790	-0.90943451		21.00000000	1.63523810	14.89034384	0.468568
22	-0.09009119	9.10342030	-0.82013798		22.00000000	1.56090909	14.20961150	0.489969
23	-0.07992395	9.09044930	-0.72654462		23.00000000	1.49304348	13.57243604	0.511329
24	-0.07008641	9.10506920	-0.63814163		24.00000000	1.43083333	13.02783651	0.532809
25	-0.05994671	9.09867860	-0.54543583		25.00000000	1.37360000	12.49794492	0.554195
26	-0.04983306	9.10312460	-0.45363652		26.00000000	1.32076923	12.02312688	0.575574
27	-0.04004017	9.10116390	-0.36441218		27.00000000	1.27185185	11.57533216	0.596941
28	-0.02987517	9.10773750	-0.27209516		28.00000000	1.22642857	11.16998949	0.618416
29	-0.02000935	9.09391020	-0.18196321		29.00000000	1.18413793	10.76844401	0.639789
30	-0.00989495	9.09743500	-0.09001865		30.00000000	1.14466667	10.41353060	0.661164
31	-0.00063942	9.10503390	-0.00582192		31.00000000	1.10774194	10.08602788	0.682631
32	0.00949338	9.10756870	0.08646160		32.00000000	1.07312500	9.77355966	0.704100
33	0.01933585	9.11018370	0.17615310		33.00000000	1.04060606	9.48011237	0.725465
34	0.02946707	9.10073470	0.26817200		34.00000000	1.01000000	9.19174205	0.746855
35	0.03929317	9.09674740	0.35744001		35.00000000	0.98114286	8.92520873	0.768328
36	0.04944598	9.10312460	0.45011288		36.00000000	0.95388889	8.68336941	0.789705
37	0.05924304	9.09197810	0.53863644		37.00000000	0.92810811	8.43833859	0.811072
38	0.06942339	9.10496230	0.63209737		38.00000000	0.90368421	8.22801067	0.832443
39	0.07955164	9.10535720	0.72434607		39.00000000	0.88051282	8.01738375	0.853925
40	0.08939857	9.09671780	0.81323356		40.00000000	0.85850000	7.80953223	0.875307
41	0.09954543	9.09887410	0.90575131		41.00000000	0.83756098	7.62086187	0.896656
42	0.10935068	9.10064600	0.99516183		42.00000000	0.81761905	7.44086152	0.918025
43	0.11950349	9.10238550	1.08776683		43.00000000	0.79860465	7.26920740	0.939505
44	0.12933181	9.10207180	1.17718742		44.00000000	0.78045455	7.10375331	0.960891
45	0.13946453	9.10537240	1.26987648		45.00000000	0.76311111	6.94841085	0.982267
46	0.14929509	9.10166740	1.35883425		46.00000000	0.74652174	6.79459258	1.003644
47	0.15945683	9.09784600	1.45071368		47.00000000	0.73063830	6.64723472	1.025124
48	0.16962825	9.10487840	1.54444459		48.00000000	0.71541667	6.51378176	1.046515
49	0.17941043	9.09105300	1.63102973		49.00000000	0.70081633	6.37115837	1.067863
50	0.18958408	9.08858970	1.72305192		50.00000000	0.68680000	6.24204341	1.089233
51	0.19936849	9.10182290	1.81461669		51.00000000	0.67333333	6.12856075	1.110725
52	0.20947219	9.07624530	1.90122098		52.00000000	0.66038462	5.99381276	1.132100
53	0.21932434	9.12325670	2.00095225		53.00000000	0.64792453	5.91118179	1.153453
54	0.22946970	9.09401230	2.08680027		54.00000000	0.63592593	5.78311819	1.174832
55	0.23927793	9.09780880	2.17690486		55.00000000	0.62436364	5.68034099	1.196303
56	0.24943893	9.11141200	2.27274086		56.00000000	0.61321429	5.58724800	1.217730
57	0.25957611	9.08641050	2.35861509		57.00000000	0.60245614	5.47416380	1.239104
58	0.26938879	9.10517220	2.45283132		58.00000000	0.59206897	5.39088989	1.260460
59	0.27953938	9.08172610	2.53870008		59.00000000	0.58203390	5.28587245	1.281935
60	0.28934166	9.10747050	2.63517063		60.00000000	0.57233333	5.21250895	1.303307
61	0.29948777	9.09138200	2.72275772		61.00000000	0.56295082	5.11800095	1.324689
62	0.30933246	9.09214780	2.81249645		62.00000000	0.55387097	5.03587670	1.346048
63	0.31948900	9.10545250	2.90909191		63.00000000	0.54507937	4.96319427	1.367521
64	0.32928383	9.09221840	2.99392050		64.00000000	0.53656250	4.87854344	1.388884
65	0.33944556	9.11188790	3.09298989		65.00000000	0.52830769	4.81388047	1.410262
66	0.34926945	9.08742520	3.17396000		66.00000000	0.52030303	4.72821487	1.431745
67	0.35942075	9.08474830	3.26524705		67.00000000	0.51253731	4.65627249	1.453133
68	0.36959440	9.10579970	3.36545258		68.00000000	0.50500000	4.59842885	1.474492
69	0.37940636	9.09029580	3.44891604		69.00000000	0.49768116	4.52406895	1.495870
70	0.38955024	9.09208110	3.54182237		70.00000000	0.49057143	4.46031521	1.517339
71	0.39934880	9.08095840	3.62646984		71.00000000	0.48366197	4.39211425	1.538733
72	0.40949938	9.08761020	3.72137074		72.00000000	0.47694444	4.33428520	1.560088
73	0.41932994	9.08293250	3.80874554		73.00000000	0.47041096	4.27271099	1.581469
74	0.42948347	9.08942790	3.90375903		74.00000000	0.46405405	4.21798587	1.602947
75	0.43930659	9.07885550	3.98840105		75.00000000	0.45786667	4.15690530	1.624311
76	0.44946834	9.07773020	4.08015232		76.00000000	0.45184211	4.10170072	1.645671
77	0.45962042	9.07399180	4.17059192		77.00000000	0.44597403	4.04676465	1.667035
78	0.46946436	9.06804750	4.25712512		78.00000000	0.44025641	3.99226604	1.688505
79	0.47959930	9.06154350	4.34590992		79.00000000	0.43468354	3.93890385	1.709897
80	0.48942912	9.06335450	4.43586962		80.00000000	0.42925000	3.89044492	1.731241
81	0.49955440	9.04762840	4.51978258		81.00000000	0.42395062	3.83574765	1.752608
82	0.50939763	9.03148460	4.60061685		82.00000000	0.41878049	3.78220953	1.774095
83	0.51950872	9.00181670	4.67652227		83.00000000	0.41373494	3.72436609	1.795480
84	0.52929169	8.97240730	4.74902062		84.00000000	0.40880952	3.66800556	1.816824
85	0.53939384	8.92306040	4.81304381		85.00000000	0.40400000	3.60491640	1.838207
86	0.54959428	8.86716560	4.87334349		86.00000000	0.39930233	3.54067985	1.859678
87	0.55940104	8.77181530	4.90696260		87.00000000	0.39471264	3.46234641	1.881066
88	0.56950325	8.65355300	4.92822656		88.00000000	0.39022727	3.37685239	1.902427
89	0.57932860	8.48573400	4.91602840		89.00000000	0.38584270	3.27415849	1.923787
90	0.58947325	8.24135880	4.85806056		90.00000000	0.38155556	3.14453624	1.945257
91	0.59927106	7.90917020	4.73973681		91.00000000	0.37736264	2.98462533	1.966644
92	0.60937101	7.49192240	4.56536032		92.00000000	0.37326087	2.79644147	1.988121
93	0.61919862	6.87544160	4.25726395		93.00000000	0.36924731	2.53873833	2.009497
94	0.62927997	6.10221720	3.84000306		94.00000000	0.36531915	2.22925679	2.030990
95	0.63943130	5.06539540	3.23897237		95.00000000	0.36147368	1.83100714	2.052418
96	0.64923429	3.81497430	2.47681213		96.00000000	0.35770833	1.36464810	2.073824
97	0.65931863	2.18175720	1.43847317		97.00000000	0.35402062	0.77238703	2.095323
98	0.66900629	0.28043270	0.18761124		98.00000000	0.35040816	0.09826591	2.116701
99	0.67913085	-2.09540250	-1.42305248		99.00000000	0.34686869	-0.72682951	2.138063
100	0.68882149	-4.77875380	-3.29170831		100.00000000	0.34340000	-1.64102405	2.159431
101	0.69905245	-8.05029770	-5.62758033		101.00000000	0.34000000	-2.73710122	2.180930
