# Supplementary material for: Study on the Electrical Injection Regeneration of Industrialized B-Doped Czochralski Silicon PERC Solar Cells
Source: Hindawi journal article supplement (doi:10.1155/2019/5357370), 2019-06-20
Supplement: f1 [file 5357370.f1.zip › section3.3/IVRawData_3-18-8h.csv]

04:48 04/04/2018
Test Lot:	JK-PERC
Recipe:	Recipe_YJX-LID
Cell Name:	3-18-8h
Test Order:	2
Test Condition:	Light
1	-0.29987437	9.09276290	-2.72668655		1.00000000	34.34000000	312.24547799	0.000000
2	-0.29007456	9.09497550	-2.63822102		2.00000000	17.17000000	156.16072934	0.061783
3	-0.27993837	9.09400940	-2.54576217		3.00000000	11.44666667	104.09609427	0.083201
4	-0.27009466	9.10423950	-2.45900647		4.00000000	8.58500000	78.15989611	0.104688
5	-0.25994357	9.09633260	-2.36453317		5.00000000	6.86800000	62.47361230	0.126081
6	-0.24976346	9.09821510	-2.27240168		6.00000000	5.72333333	52.07211776	0.147433
7	-0.23995176	9.09648610	-2.18271785		7.00000000	4.90571429	44.62476181	0.168801
8	-0.22981779	9.10264780	-2.09195040		8.00000000	4.29250000	39.07311568	0.190283
9	-0.21999046	9.08283810	-1.99813773		9.00000000	3.81555556	34.65607337	0.211708
10	-0.20981929	9.10349080	-1.91008798		10.00000000	3.43400000	31.26138741	0.233074
11	-0.19999270	9.09779640	-1.81949287		11.00000000	3.12181818	28.40166622	0.254464
12	-0.18988255	9.09786610	-1.72752601		12.00000000	2.86166667	26.03506016	0.275950
13	-0.18010509	9.10039140	-1.63902681		13.00000000	2.64153846	24.03903390	0.297327
14	-0.16991827	9.09689520	-1.54572869		14.00000000	2.45285714	22.31338437	0.318683
15	-0.16010508	9.10212520	-1.45729648		15.00000000	2.28933333	20.83779862	0.340090
16	-0.14994879	9.10251900	-1.36491171		16.00000000	2.14625000	19.53628140	0.361565
17	-0.13980217	9.08645920	-1.27030671		17.00000000	2.02000000	18.35464758	0.382934
18	-0.13000014	9.09932330	-1.18291330		18.00000000	1.90777778	17.35948678	0.404273
19	-0.11984906	9.09364410	-1.08986470		19.00000000	1.80736842	16.43556518	0.425651
20	-0.11002991	9.10189150	-1.00148030		20.00000000	1.71700000	15.62794771	0.447123
21	-0.09992275	9.09311010	-0.90860853		21.00000000	1.63523810	14.86940004	0.468497
22	-0.09006193	9.09457680	-0.81907509		22.00000000	1.56090909	14.19580761	0.489870
23	-0.07992944	9.09772970	-0.72717645		23.00000000	1.49304348	13.58330600	0.511233
24	-0.07013486	9.09587670	-0.63793807		24.00000000	1.43083333	13.01468358	0.532708
25	-0.05996591	9.10422610	-0.54594322		25.00000000	1.37360000	12.50556497	0.554099
26	-0.04981855	9.09450340	-0.45307496		26.00000000	1.32076923	12.01174026	0.575483
27	-0.04000387	9.10412790	-0.36420038		27.00000000	1.27185185	11.57910193	0.596824
28	-0.02991531	9.09711170	-0.27214287		28.00000000	1.22642857	11.15695771	0.618306
29	-0.02007160	9.09995940	-0.18265075		29.00000000	1.18413793	10.77560710	0.639683
30	-0.00985204	9.08674620	-0.08952301		30.00000000	1.14466667	10.40129548	0.661070
31	-0.00061045	9.10560800	-0.00555855		31.00000000	1.10774194	10.08666383	0.682676
32	0.00949651	9.08900260	0.08631383		32.00000000	1.07312500	9.75363592	0.704074
33	0.01929007	9.09711170	0.17548393		33.00000000	1.04060606	9.46650957	0.725434
34	0.02947585	9.08498100	0.26778751		34.00000000	1.01000000	9.17583081	0.746810
35	0.03929769	9.10021590	0.35761742		35.00000000	0.98114286	8.92861183	0.768289
36	0.04942244	9.09505270	0.44949965		36.00000000	0.95388889	8.67566971	0.789683
37	0.05931349	9.10161500	0.53984852		37.00000000	0.92810811	8.44728268	0.811031
38	0.06942782	9.09488200	0.63143781		38.00000000	0.90368421	8.21890126	0.832401
39	0.07960541	9.10542300	0.72484091		39.00000000	0.88051282	8.01744169	0.853883
40	0.08937738	9.07828520	0.81139336		40.00000000	0.85850000	7.79370784	0.875259
41	0.09955869	9.10674480	0.90665557		41.00000000	0.83756098	7.62745406	0.896597
42	0.10936043	9.09705350	0.99485768		42.00000000	0.81761905	7.43792422	0.917982
43	0.11952388	9.08787820	1.08621846		43.00000000	0.79860465	7.25762180	0.939461
44	0.12933679	9.10113430	1.17711150		44.00000000	0.78045455	7.10302163	0.960852
45	0.13947569	9.09361550	1.26833830		45.00000000	0.76311111	6.93943903	0.982198
46	0.14926404	9.09846020	1.35807293		46.00000000	0.74652174	6.79219833	1.003567
47	0.15946692	9.09321690	1.45006729		47.00000000	0.73063830	6.64385252	1.025047
48	0.16961624	9.10476210	1.54431551		48.00000000	0.71541667	6.51369855	1.046420
49	0.17941053	9.09169670	1.63114612		49.00000000	0.70081633	6.37160948	1.067768
50	0.18955538	9.09701350	1.72438785		50.00000000	0.68680000	6.24782887	1.089145
51	0.19931246	9.09634590	1.81301508		51.00000000	0.67333333	6.12487291	1.110622
52	0.20948112	9.08741760	1.90364242		52.00000000	0.66038462	6.00119078	1.131996
53	0.21928361	9.10627750	1.99685740		53.00000000	0.64792453	5.90018055	1.153372
54	0.22943738	9.08248420	2.08386138		54.00000000	0.63592593	5.77578717	1.174723
55	0.23927188	9.10849860	2.17940758		55.00000000	0.62436364	5.68701531	1.196197
56	0.24943310	9.09785460	2.26930608		56.00000000	0.61321429	5.57893441	1.217590
57	0.25956008	9.10248090	2.36264067		57.00000000	0.60245614	5.48384551	1.239011
58	0.26936257	9.08153440	2.44622545		58.00000000	0.59206897	5.37689468	1.260364
59	0.27952155	9.10075860	2.54385815		59.00000000	0.58203390	5.29695001	1.281835
60	0.28934339	9.08445550	2.62852715		60.00000000	0.57233333	5.19933670	1.303211
61	0.29949567	9.09690860	2.72448474		61.00000000	0.56295082	5.12111215	1.324602
62	0.30932868	9.08918670	2.81154612		62.00000000	0.55387097	5.03423663	1.346090
63	0.31947130	9.09007450	2.90401792		63.00000000	0.54507937	4.95481204	1.367465
64	0.32929909	9.09672640	2.99554373		64.00000000	0.53656250	4.88096226	1.388839
65	0.33942458	9.08425330	3.08341886		65.00000000	0.52830769	4.79928090	1.410223
66	0.34927544	9.10058690	3.17861149		66.00000000	0.52030303	4.73506294	1.431691
67	0.35945079	9.09071350	3.26766415		67.00000000	0.51253731	4.65932987	1.453103
68	0.36955619	9.09170340	3.35989527		68.00000000	0.50500000	4.59131022	1.474444
69	0.37941077	9.07549860	3.44334191		69.00000000	0.49768116	4.51670467	1.495813
70	0.38957572	9.07744410	3.53635182		70.00000000	0.49057143	4.45313472	1.517295
71	0.39933354	9.10421660	3.63561904		71.00000000	0.48366197	4.40336335	1.538664
72	0.40950295	9.08631900	3.72087444		72.00000000	0.47694444	4.33366937	1.560014
73	0.41933596	9.07595730	3.80587527		73.00000000	0.47041096	4.26942978	1.581389
74	0.42951801	9.08833220	3.90360236		74.00000000	0.46405405	4.21747740	1.602858
75	0.43929744	9.08715530	3.99196406		75.00000000	0.45786667	4.16070551	1.624246
76	0.44947278	9.07231240	4.07775748		76.00000000	0.45184211	4.09925273	1.645588
77	0.45963475	9.06867600	4.16827863		77.00000000	0.44597403	4.04439395	1.666959
78	0.46945435	9.05773450	4.25219286		78.00000000	0.44025641	3.98772568	1.688418
79	0.47960290	9.06512930	4.34766230		79.00000000	0.43468354	3.94046253	1.709806
80	0.48941880	9.04132750	4.42499566		80.00000000	0.42925000	3.88098983	1.731149
81	0.49954802	9.03947730	4.51565299		81.00000000	0.42395062	3.83229198	1.752533
82	0.50934827	9.03411290	4.60150978		82.00000000	0.41878049	3.78331021	1.774012
83	0.51950055	8.99737930	4.67414349		83.00000000	0.41373494	3.72253018	1.795377
84	0.52929485	8.96877000	4.74712377		84.00000000	0.40880952	3.66651859	1.816757
85	0.53943080	8.92208290	4.81284632		85.00000000	0.40400000	3.60452149	1.838118
86	0.54954880	8.85328290	4.86531099		86.00000000	0.39930233	3.53513645	1.859595
87	0.55934983	8.77306460	4.90721219		87.00000000	0.39471264	3.46283952	1.880968
88	0.56951553	8.66974740	4.93755579		88.00000000	0.39022727	3.38317188	1.902345
89	0.57928973	8.47523500	4.90961659		89.00000000	0.38584270	3.27010753	1.923696
90	0.58945239	8.24952700	4.86270341		90.00000000	0.38155556	3.14765286	1.945178
91	0.59924078	7.92129950	4.74676569		91.00000000	0.37736264	2.98920247	1.966551
92	0.60937518	7.48420480	4.56068865		92.00000000	0.37326087	2.79356079	1.988035
93	0.61914492	6.89822240	4.27099936		93.00000000	0.36924731	2.54715008	2.009541
94	0.62928307	6.11235570	3.84640196		94.00000000	0.36531915	2.23296058	2.030921
95	0.63939291	5.08629470	3.25214077		95.00000000	0.36147368	1.83856168	2.052292
96	0.64921474	3.81098220	2.47414582		96.00000000	0.35770833	1.36322009	2.073674
97	0.65926582	2.19686080	1.44831524		97.00000000	0.35402062	0.77773402	2.095157
98	0.66893810	0.26838163	0.17953070		98.00000000	0.35040816	0.09404311	2.116541
99	0.67911494	-2.09969330	-1.42593309		99.00000000	0.34686869	-0.72831786	2.137877
100	0.68883854	-4.82344340	-3.32257371		100.00000000	0.34340000	-1.65637046	2.159297
101	0.69904512	-8.10737510	-5.66742100		101.00000000	0.34000000	-2.75650753	2.180788
04:49 04/04/2018
Test Lot:	JK-PERC
Recipe:	Recipe_YJX-LID
Cell Name:	3-18-8h
Test Order:	3
Test Condition:	Light
1	-0.29989448	9.09940430	-2.72886112		1.00000000	34.34000000	312.47354366	0.000000
2	-0.29007983	9.10047250	-2.63986352		2.00000000	17.17000000	156.25511283	0.061792
3	-0.27997193	9.09402080	-2.54607055		3.00000000	11.44666667	104.09622476	0.083196
4	-0.27010742	9.10300920	-2.45879033		4.00000000	8.58500000	78.14933398	0.104566
5	-0.25996751	9.10206320	-2.36624071		5.00000000	6.86800000	62.51297006	0.126066
6	-0.24982241	9.09440610	-2.27198645		6.00000000	5.72333333	52.05031758	0.147444
7	-0.23995416	9.09292130	-2.18188429		7.00000000	4.90571429	44.60727392	0.168872
8	-0.22984403	9.10418800	-2.09254326		8.00000000	4.29250000	39.07972699	0.190277
9	-0.22001748	9.10448840	-2.00314659		9.00000000	3.81555556	34.73868130	0.211771
10	-0.20985748	9.08794400	-1.90717303		10.00000000	3.43400000	31.20799970	0.233165
11	-0.20004283	9.09789940	-1.81996954		11.00000000	3.12181818	28.40198776	0.254535
12	-0.18986498	9.10337640	-1.72841238		12.00000000	2.86166667	26.05082880	0.276012
13	-0.18010317	9.08787730	-1.63675551		13.00000000	2.64153846	24.00597742	0.297397
14	-0.16995284	9.09579470	-1.54585614		14.00000000	2.45285714	22.31068500	0.318742
15	-0.16015308	9.09786890	-1.45705173		15.00000000	2.28933333	20.82805454	0.340111
16	-0.14998490	9.08454130	-1.36254402		16.00000000	2.14625000	19.49769677	0.361602
17	-0.13983829	9.08765410	-1.27080201		17.00000000	2.02000000	18.35706128	0.382975
18	-0.13000950	9.09403420	-1.18231084		18.00000000	1.90777778	17.34939636	0.404315
19	-0.11983686	9.10963820	-1.09167044		19.00000000	1.80736842	16.46447241	0.425693
20	-0.11003710	9.09064960	-1.00030872		20.00000000	1.71700000	15.60864536	0.447172
21	-0.09992101	9.09148220	-0.90843008		21.00000000	1.63523810	14.86673804	0.468552
22	-0.09006840	9.10181810	-0.81978619		22.00000000	1.56090909	14.20711062	0.489906
23	-0.07998656	9.08085350	-0.72634621		23.00000000	1.49304348	13.55810910	0.511276
24	-0.07010268	9.10376550	-0.63819840		24.00000000	1.43083333	13.02597114	0.532747
25	-0.05994195	9.08929920	-0.54483029		25.00000000	1.37360000	12.48506138	0.554117
26	-0.04980131	9.10531430	-0.45345653		26.00000000	1.32076923	12.02601896	0.575461
27	-0.04003950	9.09197810	-0.36403821		27.00000000	1.27185185	11.56364918	0.596835
28	-0.02986015	9.08570960	-0.27130067		28.00000000	1.22642857	11.14297385	0.618313
29	-0.02001499	9.10442640	-0.18222496		29.00000000	1.18413793	10.78089664	0.639692
30	-0.00992123	9.08324620	-0.09011698		30.00000000	1.14466667	10.39728915	0.661048
31	-0.00066924	9.10176280	-0.00609130		31.00000000	1.10774194	10.08240434	0.682545
32	0.00948682	9.08792400	0.08621550		32.00000000	1.07312500	9.75247844	0.704031
33	0.01934511	9.09214970	0.17588859		33.00000000	1.04060606	9.46134608	0.725403
34	0.02941922	9.09202960	0.26748041		34.00000000	1.01000000	9.18294990	0.746773
35	0.03929090	9.09737210	0.35744395		35.00000000	0.98114286	8.92582165	0.768167
36	0.04946549	9.09461980	0.44986982		36.00000000	0.95388889	8.67525678	0.789646
37	0.05928284	9.09832670	0.53937464		37.00000000	0.92810811	8.44423078	0.811021
38	0.06938077	9.10851000	0.63195542		38.00000000	0.90368421	8.23121667	0.832410
39	0.07954419	9.08228680	0.72244318		39.00000000	0.88051282	7.99706997	0.853758
40	0.08937345	9.09759240	0.81308326		40.00000000	0.85850000	7.81028308	0.875233
41	0.09953390	9.10237500	0.90599489		41.00000000	0.83756098	7.62379409	0.896623
42	0.10931925	9.07837680	0.99244134		42.00000000	0.81761905	7.42265379	0.918007
43	0.11950872	9.09978490	1.08750365		43.00000000	0.79860465	7.26713055	0.939497
44	0.12928589	9.07812310	1.17367322		44.00000000	0.78045455	7.08506244	0.960884
45	0.13945377	9.09565640	1.26842358		45.00000000	0.76311111	6.94099646	0.982237
46	0.14928304	9.09642890	1.35794256		46.00000000	0.74652174	6.79068192	1.003609
47	0.15943976	9.09229660	1.44967359		47.00000000	0.73063830	6.64318011	1.025109
48	0.16959277	9.10034560	1.54335282		48.00000000	0.71541667	6.51053891	1.046473
49	0.17941310	9.09242060	1.63129937		49.00000000	0.70081633	6.37211680	1.067828
50	0.18953633	9.08928970	1.72275061		50.00000000	0.68680000	6.24252417	1.089204
51	0.19931720	9.10010240	1.81380693		51.00000000	0.67333333	6.12740228	1.110675
52	0.20944268	9.09381580	1.90463315		52.00000000	0.66038462	6.00541605	1.132064
53	0.21929054	9.08741380	1.99278388		53.00000000	0.64792453	5.88795830	1.153411
54	0.22945173	9.10409450	2.08895023		54.00000000	0.63592593	5.78952972	1.174788
55	0.23926611	9.09132580	2.17524616		55.00000000	0.62436364	5.67629324	1.196265
56	0.24938190	9.07869720	2.26406276		56.00000000	0.61321429	5.56718682	1.217642
57	0.25949845	9.09017370	2.35888599		57.00000000	0.60245614	5.47643096	1.238988
58	0.26934183	9.09648700	2.45006446		58.00000000	0.59206897	5.38574765	1.260364
59	0.27950451	9.08732320	2.53994782		59.00000000	0.58203390	5.28913015	1.281842
60	0.28934941	9.10218330	2.63371137		60.00000000	0.57233333	5.20948291	1.303216
61	0.29948157	9.09410950	2.72351819		61.00000000	0.56295082	5.11953640	1.324571
62	0.30927214	9.08365350	2.80932096		62.00000000	0.55387097	5.03117195	1.345949
63	0.31945789	9.10304640	2.90804000		63.00000000	0.54507937	4.96188275	1.367419
64	0.32926631	9.08852480	2.99254502		64.00000000	0.53656250	4.87656159	1.388805
65	0.33942601	9.08239170	3.08279998		65.00000000	0.52830769	4.79829740	1.410166
66	0.34921581	9.09534070	3.17623677		66.00000000	0.52030303	4.73233333	1.431548
67	0.35940230	9.09363840	3.26827456		67.00000000	0.51253731	4.66082899	1.453023
68	0.36952257	9.07843300	3.35468589		68.00000000	0.50500000	4.58460867	1.474391
69	0.37937638	9.08373360	3.44615397		69.00000000	0.49768116	4.52080307	1.495780
70	0.38951749	9.08696840	3.53953312		70.00000000	0.49057143	4.45780707	1.517124
71	0.39935270	9.08243560	3.62709518		71.00000000	0.48366197	4.39282871	1.538588
72	0.40946254	9.07458690	3.71570340		72.00000000	0.47694444	4.32807381	1.559987
73	0.41929626	9.10776230	3.81885067		73.00000000	0.47041096	4.28439120	1.581364
74	0.42945299	9.08006380	3.89946055		74.00000000	0.46405405	4.21364042	1.602842
75	0.43926811	9.07088660	3.98455121		75.00000000	0.45786667	4.15325661	1.624246
76	0.44944119	9.08244040	4.08202282		76.00000000	0.45184211	4.10382899	1.645599
77	0.45952871	9.05656620	4.16175218		77.00000000	0.44597403	4.03899329	1.666976
78	0.46939445	9.07326320	4.25893939		78.00000000	0.44025641	3.99456229	1.688466
79	0.47958913	9.05617240	4.34324184		79.00000000	0.43468354	3.93656912	1.709839
80	0.48938712	9.04953000	4.42872342		80.00000000	0.42925000	3.88451075	1.731203
81	0.49952823	9.04545970	4.51846247		81.00000000	0.42395062	3.83482822	1.752574
82	0.50932848	9.02765560	4.59804210		82.00000000	0.41878049	3.78060602	1.774052
83	0.51947850	8.98667140	4.66838258		83.00000000	0.41373494	3.71809995	1.795436
84	0.52926457	8.96947670	4.74722623		84.00000000	0.40880952	3.66680750	1.816787
85	0.53937143	8.92788980	4.81544869		85.00000000	0.40400000	3.60686748	1.838164
86	0.54954827	8.85949040	4.86871762		86.00000000	0.39930233	3.53761512	1.859652
87	0.55939764	8.77520850	4.90883093		87.00000000	0.39471264	3.46368575	1.881034
88	0.56949180	8.64309600	4.92217230		88.00000000	0.39022727	3.37277178	1.902371
89	0.57935083	8.48652840	4.91667727		89.00000000	0.38584270	3.27446500	1.923752
90	0.58939224	8.23591330	4.85418339		90.00000000	0.38155556	3.14245847	1.945238
91	0.59919542	7.92149540	4.74652376		91.00000000	0.37736264	2.98927640	1.966611
92	0.60936552	7.47107980	4.55261843		92.00000000	0.37326087	2.78866174	1.988068
93	0.61918217	6.89516260	4.26936174		93.00000000	0.36924731	2.54602025	2.009471
94	0.62925774	6.09608600	3.83600930		94.00000000	0.36531915	2.22701695	2.030969
95	0.63935572	5.07619090	3.24549169		95.00000000	0.36147368	1.83490943	2.052348
96	0.64917082	3.80380230	2.46931746		96.00000000	0.35770833	1.36065178	2.073699
97	0.65930521	2.18151330	1.43828308		97.00000000	0.35402062	0.77230069	2.095071
98	0.66901016	0.26997280	0.18061455		98.00000000	0.35040816	0.09460067	2.116541
99	0.67909771	-2.11047980	-1.43322200		99.00000000	0.34686869	-0.73205936	2.137911
100	0.68881828	-4.80689570	-3.31107763		100.00000000	0.34340000	-1.65068798	2.159293
101	0.69902337	-8.09454730	-5.65827773		101.00000000	0.34000000	-2.75214608	2.180702
04:49 04/04/2018
Test Lot:	JK-PERC
Recipe:	Recipe_YJX-LID
Cell Name:	3-18-8h
Test Order:	4
Test Condition:	Light
1	-0.29993430	9.09618090	-2.72825665		1.00000000	34.34000000	312.36285211	0.000000
2	-0.29011276	9.09975910	-2.63995623		2.00000000	17.17000000	156.24286375	0.061798
3	-0.27995256	9.09693530	-2.54671033		3.00000000	11.44666667	104.12958607	0.083222
4	-0.27015784	9.09724240	-2.45769136		4.00000000	8.58500000	78.09982600	0.104576
5	-0.26000211	9.09031300	-2.36350056		5.00000000	6.86800000	62.43226968	0.126070
6	-0.24987543	9.10242270	-2.27447179		6.00000000	5.72333333	52.09619925	0.147436
7	-0.24006358	9.10089400	-2.18479319		7.00000000	4.90571429	44.64638571	0.168845
8	-0.22994284	9.08359240	-2.08870703		8.00000000	4.29250000	38.99132038	0.190303
9	-0.22008632	9.10987570	-2.00495902		9.00000000	3.81555556	34.75923684	0.211772
10	-0.20992838	9.09223370	-1.90871789		10.00000000	3.43400000	31.22273053	0.233142
11	-0.20009270	9.09150980	-1.81914474		11.00000000	3.12181818	28.38204059	0.254510
12	-0.18999207	9.09345910	-1.72768512		12.00000000	2.86166667	26.02244879	0.275872
13	-0.18018988	9.09153940	-1.63820339		13.00000000	2.64153846	24.01565100	0.297361
14	-0.17003268	9.10236740	-1.54769992		14.00000000	2.45285714	22.32680689	0.318751
15	-0.16022305	9.08723260	-1.45598412		15.00000000	2.28933333	20.80370450	0.340112
16	-0.15006660	9.09094910	-1.36424782		16.00000000	2.14625000	19.51144951	0.361479
17	-0.13990493	9.09445380	-1.27235892		17.00000000	2.02000000	18.37079668	0.382962
18	-0.13009083	9.08236410	-1.18153228		18.00000000	1.90777778	17.32713240	0.404337
19	-0.11995596	9.09848880	-1.09141796		19.00000000	1.80736842	16.44432134	0.425730
20	-0.11015899	9.09633260	-1.00204281		20.00000000	1.71700000	15.61840307	0.447078
21	-0.09996011	9.08896160	-0.90853361		21.00000000	1.63523810	14.86261625	0.468554
22	-0.09018026	9.10152630	-0.82077796		22.00000000	1.56090909	14.20665514	0.489942
23	-0.07999626	9.10121730	-0.72806333		23.00000000	1.49304348	13.58851313	0.511327
24	-0.07019334	9.09934140	-0.63871312		24.00000000	1.43083333	13.01964099	0.532794
25	-0.06004357	9.08838080	-0.54569886		25.00000000	1.37360000	12.48379987	0.554200
26	-0.04984469	9.10287760	-0.45373011		26.00000000	1.32076923	12.02280065	0.575550
27	-0.04000157	9.08692840	-0.36349141		27.00000000	1.27185185	11.55722671	0.596925
28	-0.02985107	9.09077360	-0.27136930		28.00000000	1.22642857	11.14918448	0.618419
29	-0.02010471	9.10243890	-0.18300188		29.00000000	1.18413793	10.77854317	0.639795
30	-0.00993336	9.08867070	-0.09028106		30.00000000	1.14466667	10.40349839	0.661152
31	-0.00066334	9.09782980	-0.00603498		31.00000000	1.10774194	10.07804759	0.682654
32	0.00951449	9.09702010	0.08655353		32.00000000	1.07312500	9.76223969	0.704134
33	0.01924569	9.09044650	0.17495192		33.00000000	1.04060606	9.45957372	0.725519
34	0.02942344	9.10286430	0.26783762		34.00000000	1.01000000	9.19389294	0.746856
35	0.03922907	9.08653830	0.35645640		35.00000000	0.98114286	8.91519215	0.768237
36	0.04940831	9.09395600	0.44931699		36.00000000	0.95388889	8.67462358	0.789727
37	0.05920277	9.08093260	0.53761635		37.00000000	0.92810811	8.42808718	0.811099
38	0.06931280	9.10353850	0.63099171		38.00000000	0.90368421	8.22672400	0.832436
39	0.07948533	9.08227060	0.72190731		39.00000000	0.88051282	7.99705570	0.853810
40	0.08935199	9.10248090	0.81332477		40.00000000	0.85850000	7.81447985	0.875302
41	0.09945234	9.08882620	0.90390502		41.00000000	0.83756098	7.61244614	0.896673
42	0.10924754	9.08412360	0.99241816		42.00000000	0.81761905	7.42735249	0.918036
43	0.11938957	9.09781930	1.08618473		43.00000000	0.79860465	7.26556081	0.939414
44	0.12924282	9.08010290	1.17353810		44.00000000	0.78045455	7.08660758	0.960887
45	0.13939899	9.10512450	1.26924516		45.00000000	0.76311111	6.94822167	0.982268
46	0.14924556	9.09406280	1.35724850		46.00000000	0.74652174	6.78891558	1.003611
47	0.15937494	9.09062000	1.44881702		47.00000000	0.73063830	6.64195512	1.024978
48	0.16952366	9.08961580	1.54090494		48.00000000	0.71541667	6.50286264	1.046459
49	0.17933226	9.10041140	1.63199734		49.00000000	0.70081633	6.37771689	1.067838
50	0.18947279	9.09092240	1.72248243		50.00000000	0.68680000	6.24364550	1.089224
51	0.19924866	9.07871440	1.80892168		51.00000000	0.67333333	6.11300103	1.110571
52	0.20937282	9.10124110	1.90555251		52.00000000	0.66038462	6.01031960	1.132044
53	0.21920672	9.09149270	1.99291629		53.00000000	0.64792453	5.89060112	1.153425
54	0.22942689	9.09430500	2.08647811		54.00000000	0.63592593	5.78330433	1.174817
55	0.23924592	9.09839530	2.17675395		55.00000000	0.62436364	5.68070717	1.196301
56	0.24937901	9.09495930	2.26809195		56.00000000	0.61321429	5.57715897	1.217689
57	0.25952625	9.08510970	2.35782445		57.00000000	0.60245614	5.47338012	1.239038
58	0.26933709	9.08366300	2.44656736		58.00000000	0.59206897	5.37815496	1.260418
59	0.27949029	9.09563160	2.54214071		59.00000000	0.58203390	5.29396592	1.281897
60	0.28932419	9.09043980	2.63008413		60.00000000	0.57233333	5.20276171	1.303291
61	0.29946250	9.08701230	2.72121942		61.00000000	0.56295082	5.11554102	1.324650
62	0.30927408	9.08747960	2.81052189		62.00000000	0.55387097	5.03329112	1.346028
63	0.31942427	9.08834550	2.90303813		63.00000000	0.54507937	4.95386959	1.367512
64	0.32925671	9.08769800	2.99218554		64.00000000	0.53656250	4.87611796	1.388902
65	0.33940691	9.08696370	3.08417827		65.00000000	0.52830769	4.80071282	1.410255
66	0.34919691	9.09674840	3.17655643		66.00000000	0.52030303	4.73306576	1.431633
67	0.35938433	9.08189200	3.26388967		67.00000000	0.51253731	4.65480853	1.453140
68	0.36949733	9.08680820	3.35755137		68.00000000	0.50500000	4.58883814	1.474517
69	0.37934539	9.08066180	3.44470719		69.00000000	0.49768116	4.51927429	1.495860
70	0.38949561	9.08823200	3.53982647		70.00000000	0.49057143	4.45842696	1.517241
71	0.39931089	9.07943730	3.62551819		71.00000000	0.48366197	4.39137855	1.538704
72	0.40946931	9.07775310	3.71706130		72.00000000	0.47694444	4.32958391	1.560163
73	0.41925484	9.07649330	3.80536375		73.00000000	0.47041096	4.26968192	1.581524
74	0.42943257	9.08477400	3.90129785		74.00000000	0.46405405	4.21582620	1.602892
75	0.43925011	9.07225610	3.98498949		75.00000000	0.45786667	4.15388366	1.624359
76	0.44939214	9.07004830	4.07600842		76.00000000	0.45184211	4.09822972	1.645734
77	0.45956096	9.07989410	4.17276485		77.00000000	0.44597403	4.04939693	1.667098
78	0.46936807	9.05615620	4.25067056		78.00000000	0.44025641	3.98703082	1.688477
79	0.47951606	9.05958080	4.34421449		79.00000000	0.43468354	3.93805069	1.709957
80	0.48934922	9.04945560	4.42834404		80.00000000	0.42925000	3.88447882	1.731325
81	0.49950913	9.03679750	4.51396286		81.00000000	0.42395062	3.83115588	1.752719
82	0.50931549	9.02312950	4.59561962		82.00000000	0.41878049	3.77871057	1.774069
83	0.51945007	9.01531790	4.68300751		83.00000000	0.41373494	3.72995201	1.795548
84	0.52924973	8.94623850	4.73479431		84.00000000	0.40880952	3.65730750	1.816929
85	0.53937835	8.92706300	4.81506451		85.00000000	0.40400000	3.60653345	1.838312
86	0.54952186	8.84883210	4.86262667		86.00000000	0.39930233	3.53335924	1.859780
87	0.55934167	8.77411650	4.90772898		87.00000000	0.39471264	3.46325472	1.881169
88	0.56946731	8.64455130	4.92278937		88.00000000	0.39022727	3.37333968	1.902507
89	0.57929748	8.48005490	4.91247443		89.00000000	0.38584270	3.27196725	1.923887
90	0.58939409	8.24260520	4.85814279		90.00000000	0.38155556	3.14501181	1.945378
91	0.59921014	7.92331500	4.74773069		91.00000000	0.37736264	2.98996305	1.966753
92	0.60930085	7.47726200	4.55590209		92.00000000	0.37326087	2.79096932	1.988222
93	0.61913997	6.90207620	4.27335125		93.00000000	0.36924731	2.54857308	2.009626
94	0.62925297	6.09796950	3.83716542		94.00000000	0.36531915	2.22770503	2.031108
95	0.63937640	5.07741830	3.24638143		95.00000000	0.36147368	1.83535310	2.052503
96	0.64915967	3.79905030	2.46619024		96.00000000	0.35770833	1.35895195	2.073853
97	0.65927565	2.17527340	1.43410478		97.00000000	0.35402062	0.77009163	2.095231
98	0.66895324	0.25461358	0.17032458		98.00000000	0.35040816	0.08921868	2.116711
99	0.67906475	-2.13412210	-1.44920709		99.00000000	0.34686869	-0.74026013	2.138092
100	0.68879449	-4.84970000	-3.34044664		100.00000000	0.34340000	-1.66538698	2.159488
101	0.69899678	-8.14911080	-5.69620221		101.00000000	0.34000000	-2.77069767	2.180925
