# Supplementary material for: Study on the Electrical Injection Regeneration of Industrialized B-Doped Czochralski Silicon PERC Solar Cells
Source: Hindawi journal article supplement (doi:10.1155/2019/5357370), 2019-06-20
Supplement: f1 [file 5357370.f1.zip › section3.3/IVRawData_3-18-9h.csv]

05:51 04/04/2018
Test Lot:	JK-PERC
Recipe:	Recipe_YJX-LID
Cell Name:	3-18-9h
Test Order:	2
Test Condition:	Light
1	-0.29991859	9.09385970	-2.72741758		1.00000000	34.34000000	312.28314210	0.000000
2	-0.29008976	9.08737950	-2.63615574		2.00000000	17.17000000	156.03030602	0.061815
3	-0.27998552	9.08232400	-2.54291921		3.00000000	11.44666667	103.96233539	0.083242
4	-0.27010083	9.09389780	-2.45626934		4.00000000	8.58500000	78.07111261	0.104612
5	-0.25995493	9.08286670	-2.36113598		5.00000000	6.86800000	62.38112850	0.126093
6	-0.24979785	9.07774830	-2.26760201		6.00000000	5.72333333	51.95497944	0.147469
7	-0.23999356	9.09103200	-2.18178913		7.00000000	4.90571429	44.59800555	0.168850
8	-0.22984020	9.09285640	-2.08990393		8.00000000	4.29250000	39.03108610	0.190287
9	-0.21999647	9.08094880	-1.99777668		9.00000000	3.81555556	34.64886464	0.211748
10	-0.20987438	9.09156610	-1.90808680		10.00000000	3.43400000	31.22043799	0.233119
11	-0.20006190	9.07664010	-1.81588986		11.00000000	3.12181818	28.33562009	0.254495
12	-0.18989514	9.08465580	-1.72513198		12.00000000	2.86166667	25.99725668	0.275854
13	-0.18014444	9.09072690	-1.63764391		13.00000000	2.64153846	24.01350475	0.297352
14	-0.16998886	9.07399650	-1.54247832		14.00000000	2.45285714	22.25721713	0.318727
15	-0.16016670	9.08632470	-1.45532664		15.00000000	2.28933333	20.80162601	0.340090
16	-0.15004312	9.07855220	-1.36217430		16.00000000	2.14625000	19.48484266	0.361448
17	-0.13988604	9.07622430	-1.26963708		17.00000000	2.02000000	18.33397309	0.382917
18	-0.13006017	9.09740730	-1.18321034		18.00000000	1.90777778	17.35583148	0.404307
19	-0.11993360	9.08488750	-1.08958326		19.00000000	1.80736842	16.41973878	0.425679
20	-0.11009879	9.09240910	-1.00106324		20.00000000	1.71700000	15.61166642	0.447033
21	-0.09994321	9.06983950	-0.90646884		21.00000000	1.63523810	14.83134707	0.468519
22	-0.09011436	9.08773990	-0.81893582		22.00000000	1.56090909	14.18513583	0.489903
23	-0.07999896	9.09099200	-0.72726986		23.00000000	1.49304348	13.57324632	0.511288
24	-0.07015670	9.07295040	-0.63652827		24.00000000	1.43083333	12.98187986	0.532771
25	-0.06001972	9.08006290	-0.54498287		25.00000000	1.37360000	12.47237440	0.554139
26	-0.04984255	9.09272770	-0.45320474		26.00000000	1.32076923	12.00939497	0.575496
27	-0.04006729	9.07895660	-0.36376914		27.00000000	1.27185185	11.54708776	0.596869
28	-0.02989979	9.08062360	-0.27150873		28.00000000	1.22642857	11.13673623	0.618356
29	-0.02006349	9.08330350	-0.18224280		29.00000000	1.18413793	10.75588421	0.639745
30	-0.00991386	9.07155510	-0.08993413		30.00000000	1.14466667	10.38390674	0.661094
31	-0.00064321	9.08741950	-0.00584513		31.00000000	1.10774194	10.06651567	0.682585
32	0.00949654	9.08115100	0.08623950		32.00000000	1.07312500	9.74521017	0.704072
33	0.01931693	9.09534450	0.17569409		33.00000000	1.04060606	9.46467061	0.725452
34	0.02944915	9.06604290	0.26698728		34.00000000	1.01000000	9.15670333	0.746816
35	0.03928293	9.09242730	0.35717721		35.00000000	0.98114286	8.92097010	0.768189
36	0.04941442	9.07856750	0.44861214		36.00000000	0.95388889	8.65994467	0.789667
37	0.05925192	9.09042450	0.53862510		37.00000000	0.92810811	8.43689668	0.811055
38	0.06941392	9.07419010	0.62987506		38.00000000	0.90368421	8.20020232	0.832399
39	0.07953052	9.08696840	0.72269128		39.00000000	0.88051282	8.00119218	0.853769
40	0.08934644	9.07534030	0.81084934		40.00000000	0.85850000	7.79117965	0.875243
41	0.09951960	9.08095740	0.90373321		41.00000000	0.83756098	7.60585554	0.896614
42	0.10934817	9.07696060	0.99254903		42.00000000	0.81761905	7.42149588	0.917952
43	0.11947370	9.08155630	1.08500713		43.00000000	0.79860465	7.25257310	0.939335
44	0.12929483	9.08431150	1.17455451		44.00000000	0.78045455	7.08989220	0.960805
45	0.13944343	9.09614750	1.26839801		45.00000000	0.76311111	6.94137123	0.982172
46	0.14924224	9.06949520	1.35355178		46.00000000	0.74652174	6.77057533	1.003549
47	0.15941241	9.08386420	1.44808068		47.00000000	0.73063830	6.63701908	1.024916
48	0.16954464	9.08663650	1.54059051		48.00000000	0.71541667	6.50073120	1.046386
49	0.17937693	9.07607940	1.62803926		49.00000000	0.70081633	6.36066462	1.067761
50	0.18951735	9.08213230	1.72122165		50.00000000	0.68680000	6.23760846	1.089145
51	0.19929084	9.08972930	1.81149979		51.00000000	0.67333333	6.12041773	1.110492
52	0.20943052	9.07553010	1.90069299		52.00000000	0.66038462	5.99334045	1.131974
53	0.21927546	9.08076860	1.99118971		53.00000000	0.64792453	5.88365271	1.153352
54	0.22941290	9.08080390	2.08325356		54.00000000	0.63592593	5.77471863	1.174744
55	0.23923998	9.07705880	2.17159537		55.00000000	0.62436364	5.66738544	1.196229
56	0.24940942	9.08374600	2.26557182		56.00000000	0.61321429	5.57028282	1.217598
57	0.25955579	9.07696720	2.35597939		57.00000000	0.60245614	5.46847463	1.238957
58	0.26934269	9.08737560	2.44761819		58.00000000	0.59206897	5.38035307	1.260339
59	0.27950767	9.06978890	2.53507556		59.00000000	0.58203390	5.27892459	1.281838
60	0.28934738	9.07921980	2.62704846		60.00000000	0.57233333	5.19634013	1.303237
61	0.29946920	9.07318210	2.71713858		61.00000000	0.56295082	5.10775530	1.324581
62	0.30933574	9.07605270	2.80754748		62.00000000	0.55387097	5.02696209	1.345955
63	0.31946796	9.07295320	2.89851785		63.00000000	0.54507937	4.94547957	1.367442
64	0.32929057	9.07775500	2.98921912		64.00000000	0.53656250	4.87078292	1.388820
65	0.33944514	9.07191180	3.07941637		65.00000000	0.52830769	4.79276079	1.410183
66	0.34925583	9.07646270	3.17000751		66.00000000	0.52030303	4.72251105	1.431555
67	0.35937840	9.07107730	3.25994925		67.00000000	0.51253731	4.64926559	1.453026
68	0.36956719	9.07971100	3.35556328		68.00000000	0.50500000	4.58525406	1.474410
69	0.37937045	9.06854440	3.44033777		69.00000000	0.49768116	4.51324369	1.495766
70	0.38953990	9.07697390	3.53584351		70.00000000	0.49057143	4.45290405	1.517143
71	0.39935505	9.06905460	3.62177275		71.00000000	0.48366197	4.38635683	1.538630
72	0.40949845	9.07143120	3.71473702		72.00000000	0.47694444	4.32656871	1.560003
73	0.41930693	9.06004620	3.79894016		73.00000000	0.47041096	4.26194502	1.581356
74	0.42945704	9.07513810	3.89738195		74.00000000	0.46405405	4.21135463	1.602731
75	0.43928486	9.06057070	3.98017153		75.00000000	0.45786667	4.14853330	1.624207
76	0.44945428	9.04862980	4.06694539		76.00000000	0.45184211	4.08855194	1.645573
77	0.45957088	9.05747800	4.16255314		77.00000000	0.44597403	4.03939993	1.666937
78	0.46941435	9.05651470	4.25125796		78.00000000	0.44025641	3.98718865	1.688303
79	0.47955179	9.04376320	4.33695283		79.00000000	0.43468354	3.93117504	1.709766
80	0.48937663	9.03353600	4.42080140		80.00000000	0.42925000	3.87764533	1.731129
81	0.49951556	9.01717470	4.50421907		81.00000000	0.42395062	3.82283678	1.752511
82	0.50931883	9.00909900	4.58850376		82.00000000	0.41878049	3.77283487	1.773870
83	0.51945329	8.97290800	4.66100658		83.00000000	0.41373494	3.71240555	1.795351
84	0.52926695	8.95204830	4.73802330		84.00000000	0.40880952	3.65968260	1.816722
85	0.53938282	8.89795880	4.79940611		85.00000000	0.40400000	3.59477536	1.838105
86	0.54951656	8.82481190	4.84938028		86.00000000	0.39930233	3.52376791	1.859588
87	0.55937040	8.74691680	4.89276635		87.00000000	0.39471264	3.45251865	1.880967
88	0.56946915	8.60490230	4.90022640		88.00000000	0.39022727	3.35786756	1.902327
89	0.57932526	8.45729350	4.89952376		89.00000000	0.38584270	3.26318493	1.923700
90	0.58939719	8.18319700	4.82315332		90.00000000	0.38155556	3.12234428	1.945171
91	0.59921539	7.85583160	4.70733520		91.00000000	0.37736264	2.96449733	1.966552
92	0.60935283	7.41139410	4.51615397		92.00000000	0.37326087	2.76638341	1.988004
93	0.61915088	6.80354360	4.21242001		93.00000000	0.36924731	2.51219019	2.009412
94	0.62928683	6.00486560	3.77878284		94.00000000	0.36531915	2.19369239	2.030904
95	0.63937956	4.97419400	3.18039797		95.00000000	0.36147368	1.79804023	2.052336
96	0.64915013	3.71839670	2.41379770		96.00000000	0.35770833	1.33010149	2.073719
97	0.65925330	2.11005470	1.39106052		97.00000000	0.35402062	0.74700287	2.095103
98	0.66898292	0.25187847	0.16850239		98.00000000	0.35040816	0.08826027	2.116586
99	0.67908984	-2.04621050	-1.38956076		99.00000000	0.34686869	-0.70976635	2.137971
100	0.68882906	-4.63469980	-3.19251591		100.00000000	0.34340000	-1.59155591	2.159312
101	0.69895607	-7.73673580	-5.40763845		101.00000000	0.34000000	-2.63049017	2.180684
05:51 04/04/2018
Test Lot:	JK-PERC
Recipe:	Recipe_YJX-LID
Cell Name:	3-18-9h
Test Order:	3
Test Condition:	Light
1	-0.29990917	9.07899570	-2.72287406		1.00000000	34.34000000	311.77271234	0.000000
2	-0.29014745	9.07877350	-2.63418298		2.00000000	17.17000000	155.88254100	0.061792
3	-0.27997044	9.08038900	-2.54224050		3.00000000	11.44666667	103.94018609	0.083213
4	-0.27018040	9.08870700	-2.45559049		4.00000000	8.58500000	78.02654960	0.104700
5	-0.26000711	9.07335950	-2.35913798		5.00000000	6.86800000	62.31583305	0.126097
6	-0.24985909	9.08407400	-2.26973846		6.00000000	5.72333333	51.99118353	0.147452
7	-0.24000433	9.06933400	-2.17667943		7.00000000	4.90571429	44.49156137	0.168820
8	-0.22984964	9.08844660	-2.08897618		8.00000000	4.29250000	39.01215703	0.190329
9	-0.22000007	9.09080600	-1.99997796		9.00000000	3.81555556	34.68647534	0.211694
10	-0.20987588	9.08919910	-1.90760366		10.00000000	3.43400000	31.21230971	0.233046
11	-0.20003526	9.07764530	-1.81584914		11.00000000	3.12181818	28.33875815	0.254425
12	-0.18990214	9.08386900	-1.72504616		12.00000000	2.86166667	25.99500512	0.275908
13	-0.18014413	9.08392240	-1.63641530		13.00000000	2.64153846	23.99553040	0.297278
14	-0.16998571	9.07090280	-1.54192385		14.00000000	2.45285714	22.24962873	0.318670
15	-0.16017783	9.08494000	-1.45520597		15.00000000	2.28933333	20.79845597	0.340024
16	-0.15001421	9.07904240	-1.36198537		16.00000000	2.14625000	19.48589475	0.361501
17	-0.13987662	9.07509230	-1.26939324		17.00000000	2.02000000	18.33168645	0.382885
18	-0.13006948	9.08731370	-1.18198217		18.00000000	1.90777778	17.33657514	0.404269
19	-0.11989692	9.07347970	-1.08788227		19.00000000	1.80736842	16.39912068	0.425661
20	-0.11007936	9.07891850	-0.99940154		20.00000000	1.71700000	15.58850306	0.447132
21	-0.09990085	9.07498360	-0.90659857		21.00000000	1.63523810	14.83975890	0.468497
22	-0.09009223	9.09032440	-0.81896757		22.00000000	1.56090909	14.18917000	0.489866
23	-0.07997920	9.08378700	-0.72651405		23.00000000	1.49304348	13.56248894	0.511219
24	-0.07013709	9.08201980	-0.63698645		24.00000000	1.43083333	12.99485666	0.532703
25	-0.06000099	9.08116530	-0.54487894		25.00000000	1.37360000	12.47388866	0.554092
26	-0.04986490	9.07355980	-0.45245214		26.00000000	1.32076923	11.98407860	0.575444
27	-0.04002130	9.08695130	-0.36367158		27.00000000	1.27185185	11.55725584	0.596796
28	-0.02988371	9.07321260	-0.27114128		28.00000000	1.22642857	11.12764717	0.618276
29	-0.02006914	9.09190270	-0.18246664		29.00000000	1.18413793	10.76606685	0.639645
30	-0.00990402	9.07601640	-0.08988901		30.00000000	1.14466667	10.38901344	0.661022
31	-0.00066103	9.08417610	-0.00600495		31.00000000	1.10774194	10.06292282	0.682490
32	0.00949569	9.08588310	0.08627676		32.00000000	1.07312500	9.75028830	0.703969
33	0.01928096	9.07118030	0.17490109		33.00000000	1.04060606	9.43952520	0.725339
34	0.02943761	9.08337970	0.26739298		34.00000000	1.01000000	9.17421350	0.746726
35	0.03925860	9.08086110	0.35650192		35.00000000	0.98114286	8.90962200	0.768220
36	0.04943385	9.08139230	0.44892821		36.00000000	0.95388889	8.66263921	0.789607
37	0.05923550	9.07859330	0.53777500		37.00000000	0.92810811	8.42591605	0.810954
38	0.06936610	9.08437920	0.63014793		38.00000000	0.90368421	8.20941005	0.832326
39	0.07954209	9.06609150	0.72113589		39.00000000	0.88051282	7.98280980	0.853809
40	0.08938094	9.08076950	0.81164773		40.00000000	0.85850000	7.79584062	0.875185
41	0.09949294	9.07870670	0.90326719		41.00000000	0.83756098	7.60397044	0.896536
42	0.10934891	9.07303430	0.99212641		42.00000000	0.81761905	7.41828566	0.917917
43	0.11948025	9.08080290	1.08497660		43.00000000	0.79860465	7.25197143	0.939398
44	0.12936451	9.08032230	1.17467144		44.00000000	0.78045455	7.08677881	0.960760
45	0.13948394	9.08441260	1.26712966		45.00000000	0.76311111	6.93241619	0.982118
46	0.14928633	9.07936100	1.35542448		46.00000000	0.74652174	6.77794036	1.003484
47	0.15941395	9.06519030	1.44511779		47.00000000	0.73063830	6.62337521	1.025014
48	0.16953784	9.09052940	1.54118872		48.00000000	0.71541667	6.50351624	1.046393
49	0.17941168	9.08517550	1.62998660		49.00000000	0.70081633	6.36703932	1.067732
50	0.18951847	9.08165070	1.72114055		50.00000000	0.68680000	6.23727770	1.089107
51	0.19933052	9.07902530	1.80972683		51.00000000	0.67333333	6.11321037	1.110588
52	0.20947303	9.09498020	1.90515306		52.00000000	0.66038462	6.00618500	1.131961
53	0.21926574	9.05965610	1.98647220		53.00000000	0.64792453	5.86997341	1.153312
54	0.22944546	9.09173770	2.08605794		54.00000000	0.63592593	5.78167172	1.174684
55	0.23926422	9.05834100	2.16733689		55.00000000	0.62436364	5.65569873	1.196168
56	0.24938440	9.08768370	2.26632655		56.00000000	0.61321429	5.57269747	1.217551
57	0.25954401	9.08052730	2.35679647		57.00000000	0.60245614	5.47061943	1.238921
58	0.26935160	9.08153530	2.44612606		58.00000000	0.59206897	5.37689521	1.260282
59	0.27950677	9.07159710	2.53557280		59.00000000	0.58203390	5.27997702	1.281759
60	0.28931883	9.07745550	2.62627880		60.00000000	0.57233333	5.19533036	1.303127
61	0.29948440	9.07864480	2.71891249		61.00000000	0.56295082	5.11083053	1.324505
62	0.30928606	9.07412240	2.80649957		62.00000000	0.55387097	5.02589296	1.345867
63	0.31944343	9.08202650	2.90119370		63.00000000	0.54507937	4.95042524	1.367341
64	0.32924509	9.06693270	2.98524307		64.00000000	0.53656250	4.86497608	1.388719
65	0.33941141	9.08201120	3.08253823		65.00000000	0.52830769	4.79809638	1.410110
66	0.34925249	9.06338790	3.16541079		66.00000000	0.52030303	4.71570819	1.431584
67	0.35937640	9.07982640	3.26307532		67.00000000	0.51253731	4.65374983	1.452975
68	0.36952785	9.07930560	3.35505628		68.00000000	0.50500000	4.58504933	1.474319
69	0.37935776	9.07181740	3.44146433		69.00000000	0.49768116	4.51487260	1.495685
70	0.38953227	9.08081440	3.53727025		70.00000000	0.49057143	4.45478809	1.517203
71	0.39936143	9.06239700	3.61917183		71.00000000	0.48366197	4.38313680	1.538577
72	0.40947419	9.07668110	3.71666664		72.00000000	0.47694444	4.32907262	1.559930
73	0.41928104	9.06769370	3.80191204		73.00000000	0.47041096	4.26554249	1.581315
74	0.42948234	9.06531520	3.89339278		74.00000000	0.46405405	4.20679627	1.602786
75	0.43927208	9.05081270	3.97576932		75.00000000	0.45786667	4.14406544	1.624153
76	0.44944212	9.05792050	4.07101099		76.00000000	0.45184211	4.09274987	1.645516
77	0.45958388	9.04864310	4.15861050		77.00000000	0.44597403	4.03545979	1.666891
78	0.46941677	9.06634330	4.25589359		78.00000000	0.44025641	3.99151576	1.688369
79	0.47958085	9.04296590	4.33683327		79.00000000	0.43468354	3.93082847	1.709740
80	0.48940259	9.03545380	4.42197449		80.00000000	0.42925000	3.87846854	1.731085
81	0.49952576	9.02415080	4.50779579		81.00000000	0.42395062	3.82579430	1.752463
82	0.50933784	9.00976660	4.58901506		82.00000000	0.41878049	3.77311445	1.773937
83	0.51949370	8.96781160	4.65872163		83.00000000	0.41373494	3.71029699	1.795311
84	0.52927154	8.95469570	4.73946558		84.00000000	0.40880952	3.66076488	1.816661
85	0.53938949	8.89856910	4.79979465		85.00000000	0.40400000	3.59502192	1.838036
86	0.54956400	8.83643250	4.85618519		86.00000000	0.39930233	3.52840805	1.859501
87	0.55938274	8.75642780	4.89819458		87.00000000	0.39471264	3.45627277	1.880878
88	0.56948209	8.62354660	4.91095534		88.00000000	0.39022727	3.36514307	1.902249
89	0.57931054	8.46005920	4.90100146		89.00000000	0.38584270	3.26425206	1.923608
90	0.58942622	8.19850920	4.83241629		90.00000000	0.38155556	3.12818673	1.945125
91	0.59925020	7.89046340	4.72836177		91.00000000	0.37736264	2.97756608	1.966497
92	0.60935104	7.42910390	4.52693219		92.00000000	0.37326087	2.77299378	1.987978
93	0.61915714	6.84269620	4.23670421		93.00000000	0.36924731	2.52664718	2.009340
94	0.62928033	6.05533550	3.81050352		94.00000000	0.36531915	2.21213001	2.030821
95	0.63939154	5.00393920	3.19947639		95.00000000	0.36147368	1.80879234	2.052212
96	0.64917535	3.75784250	2.43949872		96.00000000	0.35770833	1.34421158	2.073589
97	0.65929550	2.13753820	1.40926932		97.00000000	0.35402062	0.75673260	2.095060
98	0.66899592	0.23719800	0.15868449		98.00000000	0.35040816	0.08311612	2.116440
99	0.67911017	-2.08741500	-1.41758476		99.00000000	0.34686869	-0.72405890	2.137796
100	0.68880016	-4.72484450	-3.25447365		100.00000000	0.34340000	-1.62251160	2.159175
101	0.69899625	-7.92131520	-5.53696962		101.00000000	0.34000000	-2.69324717	2.180659
05:51 04/04/2018
Test Lot:	JK-PERC
Recipe:	Recipe_YJX-LID
Cell Name:	3-18-9h
Test Order:	4
Test Condition:	Light
1	-0.29990068	9.07815170	-2.72254387		1.00000000	34.34000000	311.74372938	0.000000
2	-0.29012910	9.09508040	-2.63874749		2.00000000	17.17000000	156.16253047	0.061786
3	-0.28000104	9.07635400	-2.54138856		3.00000000	11.44666667	103.89399879	0.083217
4	-0.27018183	9.08302500	-2.45406832		4.00000000	8.58500000	77.97776963	0.104720
5	-0.26003516	9.07640930	-2.36018554		5.00000000	6.86800000	62.33677907	0.126097
6	-0.24989815	9.08408450	-2.27009591		6.00000000	5.72333333	51.99124362	0.147506
7	-0.24002388	9.07566830	-2.17837712		7.00000000	4.90571429	44.52263563	0.168914
8	-0.22991218	9.08416650	-2.08856052		8.00000000	4.29250000	38.99378470	0.190411
9	-0.22010265	9.07295990	-1.99698252		9.00000000	3.81555556	34.61838255	0.211786
10	-0.20991430	9.09045600	-1.90821671		10.00000000	3.43400000	31.21662590	0.233160
11	-0.20009585	9.07483860	-1.81583754		11.00000000	3.12181818	28.32999614	0.254541
12	-0.18997000	9.08139420	-1.72519246		12.00000000	2.86166667	25.98792307	0.276075
13	-0.18017313	9.08647920	-1.63713940		13.00000000	2.64153846	24.00228429	0.297454
14	-0.17001231	9.06262780	-1.54075829		14.00000000	2.45285714	22.22933133	0.318798
15	-0.16019906	9.09855370	-1.45757975		15.00000000	2.28933333	20.82962227	0.340189
16	-0.15004866	9.07421490	-1.36157379		16.00000000	2.14625000	19.47553373	0.361676
17	-0.13992059	9.08793640	-1.27158942		17.00000000	2.02000000	18.35763153	0.383052
18	-0.13008130	9.07999230	-1.18113720		18.00000000	1.90777778	17.32260753	0.404430
19	-0.11995397	9.07815840	-1.08896114		19.00000000	1.80736842	16.40757681	0.425813
20	-0.11007597	9.08728890	-1.00029214		20.00000000	1.71700000	15.60287504	0.447283
21	-0.09995534	9.08469870	-0.90806417		21.00000000	1.63523810	14.85564540	0.468665
22	-0.09014507	9.08171650	-0.81867201		22.00000000	1.56090909	14.17573385	0.490029
23	-0.07998723	9.08217720	-0.72645818		23.00000000	1.49304348	13.56008544	0.511388
24	-0.07014050	9.07524590	-0.63654225		24.00000000	1.43083333	12.98516434	0.532865
25	-0.06001167	9.08672620	-0.54530965		25.00000000	1.37360000	12.48152711	0.554239
26	-0.04985904	9.08523270	-0.45298101		26.00000000	1.32076923	11.99949580	0.575623
27	-0.04001900	9.08074670	-0.36340242		27.00000000	1.27185185	11.54936451	0.596987
28	-0.02988944	9.08877370	-0.27165837		28.00000000	1.22642857	11.14673174	0.618469
29	-0.02004270	9.07742400	-0.18193612		29.00000000	1.18413793	10.74892207	0.639857
30	-0.00992952	9.09001540	-0.09025947		30.00000000	1.14466667	10.40503763	0.661237
31	-0.00065736	9.07389740	-0.00596481		31.00000000	1.10774194	10.05153667	0.682822
32	0.00949358	9.07838340	0.08618634		32.00000000	1.07312500	9.74224019	0.704205
33	0.01929092	9.07709690	0.17510550		33.00000000	1.04060606	9.44568205	0.725576
34	0.02944475	9.08757210	0.26758126		34.00000000	1.01000000	9.17844782	0.746956
35	0.03928674	9.07766250	0.35663177		35.00000000	0.98114286	8.90648372	0.768449
36	0.04938996	9.08923630	0.44891704		36.00000000	0.95388889	8.67012152	0.789841
37	0.05921112	9.08858200	0.53814508		37.00000000	0.92810811	8.43518665	0.811189
38	0.06934783	9.07757090	0.62950983		38.00000000	0.90368421	8.20325749	0.832577
39	0.07953292	9.08351040	0.72243812		39.00000000	0.88051282	7.99814736	0.854058
40	0.08933546	9.08319190	0.81145116		40.00000000	0.85850000	7.79792025	0.875444
41	0.09944911	9.07399750	0.90240100		41.00000000	0.83756098	7.60002620	0.896808
42	0.10926580	9.08787920	0.99299439		42.00000000	0.81761905	7.43042314	0.918187
43	0.11946056	9.06957720	1.08345677		43.00000000	0.79860465	7.24300654	0.939660
44	0.12928171	9.08549310	1.17458808		44.00000000	0.78045455	7.09081439	0.961042
45	0.13939983	9.08879760	1.26697684		45.00000000	0.76311111	6.93576244	0.982397
46	0.14920907	9.07094380	1.35346709		46.00000000	0.74652174	6.77165674	1.003774
47	0.15935397	9.08913140	1.44838917		47.00000000	0.73063830	6.64086750	1.025261
48	0.16953012	9.07661820	1.53876017		48.00000000	0.71541667	6.49356394	1.046645
49	0.17934979	9.07071880	1.62683151		49.00000000	0.70081633	6.35690783	1.068009
50	0.18948279	9.07247540	1.71907795		50.00000000	0.68680000	6.23097610	1.089388
51	0.19926748	9.07891270	1.80913205		51.00000000	0.67333333	6.11313455	1.110866
52	0.20942874	9.08586030	1.90284027		52.00000000	0.66038462	6.00016236	1.132257
53	0.21927744	9.08017060	1.99107656		53.00000000	0.64792453	5.88326525	1.153629
54	0.22941341	9.06996060	2.08077059		54.00000000	0.63592593	5.76782309	1.174991
55	0.23923828	9.07413480	2.17088040		55.00000000	0.62436364	5.66555980	1.196476
56	0.24940997	9.08295440	2.26537938		56.00000000	0.61321429	5.56979739	1.217852
57	0.25954893	9.07729240	2.35600153		57.00000000	0.60245614	5.46867054	1.239253
58	0.26934180	9.07300950	2.44374071		58.00000000	0.59206897	5.37184735	1.260617
59	0.27951720	9.07088850	2.53546936		59.00000000	0.58203390	5.27956459	1.282085
60	0.28931826	9.07520290	2.62562191		60.00000000	0.57233333	5.19404113	1.303467
61	0.29946169	9.08040810	2.71923436		61.00000000	0.56295082	5.11182318	1.324845
62	0.30930814	9.06410980	2.80360294		62.00000000	0.55387097	5.02034727	1.346344
63	0.31942847	9.08352180	2.90153547		63.00000000	0.54507937	4.95124030	1.367728
64	0.32927418	9.06815530	2.98590940		64.00000000	0.53656250	4.86563208	1.389085
65	0.33939901	9.07776640	3.08098493		65.00000000	0.52830769	4.79585382	1.410462
66	0.34923279	9.07245540	3.16839891		66.00000000	0.52030303	4.72042604	1.431957
67	0.35939258	9.06698510	3.25860717		67.00000000	0.51253731	4.64716818	1.453352
68	0.36954641	9.07960700	3.35533617		68.00000000	0.50500000	4.58520154	1.474709
69	0.37936237	9.07157990	3.44141605		69.00000000	0.49768116	4.51475440	1.496095
70	0.38950354	9.07442670	3.53452132		70.00000000	0.49057143	4.45165447	1.517576
71	0.39932990	9.07135580	3.62246360		71.00000000	0.48366197	4.38746983	1.538964
72	0.40947706	9.07336040	3.71533294		72.00000000	0.47694444	4.32748884	1.560310
73	0.41929224	9.06722550	3.80181729		73.00000000	0.47041096	4.26532224	1.581674
74	0.42941928	9.06295970	3.89180963		74.00000000	0.46405405	4.20570319	1.603151
75	0.43925384	9.07282450	3.98527300		75.00000000	0.45786667	4.15414391	1.624526
76	0.44942626	9.05679510	4.07036155		76.00000000	0.45184211	4.09224136	1.645889
77	0.45955256	9.05185990	4.15980539		77.00000000	0.44597403	4.03689440	1.667265
78	0.46939382	9.04272460	4.24459904		78.00000000	0.44025641	3.98111747	1.688755
79	0.47955805	9.04997920	4.33999038		79.00000000	0.43468354	3.93387703	1.710131
80	0.48937401	9.04537680	4.42657232		80.00000000	0.42925000	3.88272799	1.731493
81	0.49950776	9.00751500	4.49932364		81.00000000	0.42395062	3.81874154	1.752873
82	0.50932366	9.01618480	4.59215624		82.00000000	0.41878049	3.77580227	1.774360
83	0.51944625	8.98302750	4.66619995		83.00000000	0.41373494	3.71659234	1.795748
84	0.52922946	8.94049260	4.73157207		84.00000000	0.40880952	3.65495852	1.817103
85	0.53938180	8.91710190	4.80972247		85.00000000	0.40400000	3.60250917	1.838479
86	0.54955202	8.83870120	4.85732610		86.00000000	0.39930233	3.52931394	1.859958
87	0.55935603	8.75176910	4.89535482		87.00000000	0.39471264	3.45443392	1.881339
88	0.56949347	8.62376500	4.91117785		88.00000000	0.39022727	3.36522830	1.902739
89	0.57930648	8.44872950	4.89440375		89.00000000	0.38584270	3.25988057	1.924095
90	0.58943945	8.20703790	4.83755191		90.00000000	0.38155556	3.13144091	1.945582
91	0.59920031	7.87708760	4.71995333		91.00000000	0.37736264	2.97251855	1.966975
92	0.60936087	7.42176200	4.52253135		92.00000000	0.37326087	2.77025334	1.988464
93	0.61913514	6.84908100	4.24050672		93.00000000	0.36924731	2.52900475	2.009967
94	0.62927336	6.04022930	3.80095539		94.00000000	0.36531915	2.20661143	2.031369
95	0.63939291	4.99624730	3.19456510		95.00000000	0.36147368	1.80601192	2.052723
96	0.64917094	3.74762540	2.43284950		96.00000000	0.35770833	1.34055684	2.074099
97	0.65925777	2.12970020	1.40402140		97.00000000	0.35402062	0.75395778	2.095593
98	0.66896284	0.23209500	0.15526293		98.00000000	0.35040816	0.08132798	2.116967
99	0.67908913	-2.09616140	-1.42348042		99.00000000	0.34686869	-0.72709275	2.138375
100	0.68881571	-4.74248500	-3.26669817		100.00000000	0.34340000	-1.62856935	2.159757
101	0.69899857	-7.93028880	-5.54326053		101.00000000	0.34000000	-2.69629819	2.181249
