# Supplementary material for: Study on the Electrical Injection Regeneration of Industrialized B-Doped Czochralski Silicon PERC Solar Cells
Source: Hindawi journal article supplement (doi:10.1155/2019/5357370), 2019-06-20
Supplement: f1 [file 5357370.f1.zip › section3.3/IVRawData_3-18-10h.csv]

06:52 04/04/2018
Test Lot:	JK-PERC
Recipe:	Recipe_YJX-LID
Cell Name:	3-18-10h
Test Order:	2
Test Condition:	Light
1	-0.29990476	9.09165380	-2.72663025		1.00000000	34.34000000	312.20739149	0.000000
2	-0.29015550	9.10466580	-2.64176886		2.00000000	17.17000000	156.32711179	0.061779
3	-0.28005049	9.09312730	-2.54653476		3.00000000	11.44666667	104.08599716	0.083201
4	-0.27020076	9.09102920	-2.45640300		4.00000000	8.58500000	78.04648568	0.104720
5	-0.26002356	9.08282660	-2.36174891		5.00000000	6.86800000	62.38085309	0.126135
6	-0.24985678	9.10247140	-2.27431419		6.00000000	5.72333333	52.09647798	0.147502
7	-0.24005617	9.08645340	-2.18125920		7.00000000	4.90571429	44.57554425	0.168937
8	-0.22988939	9.10066220	-2.09214568		8.00000000	4.29250000	39.06459249	0.190443
9	-0.22003818	9.09422020	-2.00107566		9.00000000	3.81555556	34.69950241	0.211821
10	-0.20989521	9.09434220	-1.90885887		10.00000000	3.43400000	31.22997111	0.233191
11	-0.20005962	9.09534360	-1.81961098		11.00000000	3.12181818	28.39400902	0.254582
12	-0.18995386	9.09737590	-1.72808167		12.00000000	2.86166667	26.03365737	0.276062
13	-0.18019122	9.08408830	-1.63687295		13.00000000	2.64153846	23.99596863	0.297457
14	-0.17004080	9.09901810	-1.54720432		14.00000000	2.45285714	22.31859154	0.318825
15	-0.16021340	9.08183570	-1.45503178		15.00000000	2.28933333	20.79134920	0.340197
16	-0.14999823	9.09126280	-1.36367333		16.00000000	2.14625000	19.51212278	0.361689
17	-0.13989545	9.09008790	-1.27166194		17.00000000	2.02000000	18.36197756	0.383068
18	-0.13005318	9.09421540	-1.18273163		18.00000000	1.90777778	17.34974205	0.404432
19	-0.11990723	9.08471110	-1.08932254		19.00000000	1.80736842	16.41941996	0.425811
20	-0.11011779	9.08915520	-1.00087768		20.00000000	1.71700000	15.60607948	0.447294
21	-0.09992272	9.09606460	-0.90890349		21.00000000	1.63523810	14.87423135	0.468683
22	-0.09017123	9.07676030	-0.81846267		22.00000000	1.56090909	14.16799767	0.490029
23	-0.08001933	9.09721950	-0.72795343		23.00000000	1.49304348	13.58254424	0.511404
24	-0.07014281	9.08158870	-0.63700818		24.00000000	1.43083333	12.99423983	0.532868
25	-0.06003705	9.08784200	-0.54560726		25.00000000	1.37360000	12.48305977	0.554240
26	-0.04981668	9.09390450	-0.45302812		26.00000000	1.32076923	12.01094925	0.575626
27	-0.04005776	9.08242990	-0.36382176		27.00000000	1.27185185	11.55150529	0.596980
28	-0.02991702	9.08918190	-0.27192122		28.00000000	1.22642857	11.14723237	0.618459
29	-0.02002561	9.09769630	-0.18218695		29.00000000	1.18413793	10.77292727	0.639833
30	-0.00990199	9.08693030	-0.08997873		30.00000000	1.14466667	10.40150622	0.661233
31	-0.00064471	9.09415340	-0.00586309		31.00000000	1.10774194	10.07397509	0.682759
32	0.00946977	9.07858940	0.08597217		32.00000000	1.07312500	9.74246125	0.704220
33	0.01928052	9.09401510	0.17533730		33.00000000	1.04060606	9.46328723	0.725597
34	0.02938747	9.10416980	0.26754854		34.00000000	1.01000000	9.19521150	0.746981
35	0.03925850	9.08782480	0.35677439		35.00000000	0.98114286	8.91645439	0.768469
36	0.04938779	9.07942870	0.44841289		36.00000000	0.95388889	8.66076615	0.789853
37	0.05922607	9.10400960	0.53919471		37.00000000	0.92810811	8.44950513	0.811207
38	0.06937619	9.08421900	0.63022853		38.00000000	0.90368421	8.20926528	0.832595
39	0.07952631	9.08318040	0.72235185		39.00000000	0.88051282	7.99785679	0.854082
40	0.08930506	9.10403820	0.81303666		40.00000000	0.85850000	7.81581679	0.875458
41	0.09949314	9.08457280	0.90385266		41.00000000	0.83756098	7.60888366	0.896820
42	0.10931430	9.09391120	0.99409454		42.00000000	0.81761905	7.43535501	0.918192
43	0.11944359	9.08101940	1.08466956		43.00000000	0.79860465	7.25214433	0.939665
44	0.12927890	9.10134980	1.17661249		44.00000000	0.78045455	7.10318982	0.961056
45	0.13937692	9.08762840	1.26660566		45.00000000	0.76311111	6.93487021	0.982406
46	0.14919138	9.08923340	1.35603527		46.00000000	0.74652174	6.78531033	1.003783
47	0.15939063	9.09560680	1.44975450		47.00000000	0.73063830	6.64559867	1.025261
48	0.16952215	9.09181020	1.54126321		48.00000000	0.71541667	6.50443255	1.046634
49	0.17933586	9.09553340	1.63115530		49.00000000	0.70081633	6.37429831	1.068007
50	0.18944728	9.09416870	1.72286552		50.00000000	0.68680000	6.24587506	1.089379
51	0.19931608	9.08249000	1.81028630		51.00000000	0.67333333	6.11554327	1.110856
52	0.20938508	9.08445260	1.90214883		52.00000000	0.66038462	5.99923274	1.132246
53	0.21922188	9.08975600	1.99267340		53.00000000	0.64792453	5.88947587	1.153604
54	0.22939955	9.08509350	2.08411636		54.00000000	0.63592593	5.77744650	1.174980
55	0.23924005	9.09877300	2.17679091		55.00000000	0.62436364	5.68094300	1.196464
56	0.24940209	9.08306410	2.26533517		56.00000000	0.61321429	5.56986466	1.217839
57	0.25955519	9.09452920	2.36053225		57.00000000	0.60245614	5.47905496	1.239216
58	0.26932946	9.09496590	2.44954225		58.00000000	0.59206897	5.38484705	1.260578
59	0.27951160	9.06978130	2.53510908		59.00000000	0.58203390	5.27892017	1.282057
60	0.28933275	9.09287170	2.63086557		60.00000000	0.57233333	5.20415357	1.303454
61	0.29943302	9.08697700	2.72094097		61.00000000	0.56295082	5.11552115	1.324839
62	0.30927724	9.08375840	2.80939973		62.00000000	0.55387097	5.03123006	1.346194
63	0.31938198	9.09868620	2.90595641		63.00000000	0.54507937	4.95950610	1.367668
64	0.32929766	9.06831260	2.98617412		64.00000000	0.53656250	4.86571648	1.389043
65	0.33938304	9.10435390	3.08986330		65.00000000	0.52830769	4.80990020	1.410439
66	0.34921983	9.07963090	3.17078716		66.00000000	0.52030303	4.72415947	1.431928
67	0.35938931	9.08273320	3.26423722		67.00000000	0.51253731	4.65523967	1.453320
68	0.36952752	9.08323760	3.35650626		68.00000000	0.50500000	4.58703499	1.474675
69	0.37939781	9.09289360	3.44982392		69.00000000	0.49768116	4.52536183	1.496063
70	0.38947499	9.08801170	3.53955327		70.00000000	0.49057143	4.45831888	1.517544
71	0.39929467	9.08414550	3.62725088		71.00000000	0.48366197	4.39365572	1.538920
72	0.40945670	9.07224460	3.71469134		72.00000000	0.47694444	4.32695666	1.560283
73	0.41921014	9.07625010	3.80485608		73.00000000	0.47041096	4.26956751	1.581663
74	0.42941606	9.06463430	3.89249955		74.00000000	0.46405405	4.20648030	1.603134
75	0.43923500	9.07169720	3.98460692		75.00000000	0.45786667	4.15362776	1.624507
76	0.44938216	9.07076070	4.07623804		76.00000000	0.45184211	4.09855161	1.645849
77	0.45951664	9.05526350	4.16104426		77.00000000	0.44597403	4.03841232	1.667234
78	0.46942785	9.06873990	4.25711907		78.00000000	0.44025641	3.99257087	1.688705
79	0.47952962	9.04519180	4.33743739		79.00000000	0.43468354	3.93179603	1.710083
80	0.48937756	9.04021070	4.42407625		80.00000000	0.42925000	3.88051044	1.731449
81	0.49943838	9.03496840	4.51240998		81.00000000	0.42395062	3.83038043	1.752829
82	0.50927967	9.00941280	4.58831078		82.00000000	0.41878049	3.77296629	1.774304
83	0.51945132	8.98768620	4.66866546		83.00000000	0.41373494	3.71851981	1.795693
84	0.52921075	8.95637320	4.73980898		84.00000000	0.40880952	3.66145066	1.817053
85	0.53935266	8.92640020	4.81447769		85.00000000	0.40400000	3.60626568	1.838430
86	0.54952514	8.83669950	4.85598853		86.00000000	0.39930233	3.52851466	1.859929
87	0.55928898	8.74715140	4.89218538		87.00000000	0.39471264	3.45261125	1.881318
88	0.56943244	8.63549140	4.91732894		88.00000000	0.39022727	3.36980426	1.902702
89	0.57927811	8.45042510	4.89514628		89.00000000	0.38584270	3.26053481	1.924064
90	0.58945578	8.20855050	4.83857754		90.00000000	0.38155556	3.13201805	1.945545
91	0.59923452	7.87607620	4.71961674		91.00000000	0.37736264	2.97213689	1.966927
92	0.60934371	7.41919180	4.52083786		92.00000000	0.37326087	2.76929398	1.988406
93	0.61910385	6.81600710	4.21981624		93.00000000	0.36924731	2.51679230	2.009775
94	0.62924880	6.02397350	3.79057810		94.00000000	0.36531915	2.20067287	2.031263
95	0.63931483	4.99907160	3.19598061		95.00000000	0.36147368	1.80703283	2.052643
96	0.64910024	3.71874500	2.41383827		96.00000000	0.35770833	1.33022608	2.074025
97	0.65931290	2.12254980	1.39942446		97.00000000	0.35402062	0.75142639	2.095533
98	0.66894054	0.22586448	0.15108991		98.00000000	0.35040816	0.07914476	2.116913
99	0.67911446	-2.09331250	-1.42159879		99.00000000	0.34686869	-0.72610456	2.138261
100	0.68877637	-4.68465230	-3.22667781		100.00000000	0.34340000	-1.60870960	2.159689
101	0.69901729	-7.84909490	-5.48665305		101.00000000	0.34000000	-2.66869227	2.181181
06:52 04/04/2018
Test Lot:	JK-PERC
Recipe:	Recipe_YJX-LID
Cell Name:	3-18-10h
Test Order:	3
Test Condition:	Light
1	-0.29994148	9.09145070	-2.72690318		1.00000000	34.34000000	312.20041704	0.000000
2	-0.29010367	9.10317990	-2.64086590		2.00000000	17.17000000	156.30159888	0.061799
3	-0.27996886	9.08951000	-2.54477975		3.00000000	11.44666667	104.04459113	0.083225
4	-0.27012956	9.09971520	-2.45810206		4.00000000	8.58500000	78.12105499	0.104733
5	-0.25995755	9.09496400	-2.36430456		5.00000000	6.86800000	62.46421275	0.126134
6	-0.24984732	9.09467510	-2.27228020		6.00000000	5.72333333	52.05185716	0.147520
7	-0.23997973	9.09253410	-2.18202388		7.00000000	4.90571429	44.60537443	0.168865
8	-0.22983824	9.09855650	-2.09119621		8.00000000	4.29250000	39.05555378	0.190340
9	-0.22004282	9.08865070	-1.99989233		9.00000000	3.81555556	34.67825167	0.211773
10	-0.20989613	9.08700660	-1.90732752		10.00000000	3.43400000	31.20478066	0.233176
11	-0.20005384	9.08320140	-1.81712932		11.00000000	3.12181818	28.35610328	0.254623
12	-0.18998826	9.08263780	-1.72559455		12.00000000	2.86166667	25.99148184	0.276085
13	-0.18018170	9.09367560	-1.63851393		13.00000000	2.64153846	24.02129385	0.297460
14	-0.16998141	9.08112530	-1.54362248		14.00000000	2.45285714	22.27470306	0.318839
15	-0.16023736	9.10013200	-1.45818113		15.00000000	2.28933333	20.83323553	0.340185
16	-0.15005344	9.08266070	-1.36288448		16.00000000	2.14625000	19.49366053	0.361667
17	-0.13988292	9.09113500	-1.27169451		17.00000000	2.02000000	18.36409270	0.383051
18	-0.13008082	9.08450980	-1.18172048		18.00000000	1.90777778	17.33122592	0.404430
19	-0.11995794	9.08821680	-1.09020377		19.00000000	1.80736842	16.42575605	0.425832
20	-0.11013798	9.08396430	-1.00048948		20.00000000	1.71700000	15.59716670	0.447312
21	-0.09991685	9.09168910	-0.90841296		21.00000000	1.63523810	14.86707637	0.468705
22	-0.09015792	9.08450510	-0.81904007		22.00000000	1.56090909	14.18008660	0.490098
23	-0.07996433	9.09345150	-0.72715171		23.00000000	1.49304348	13.57691846	0.511456
24	-0.07015776	9.07583520	-0.63674026		24.00000000	1.43083333	12.98600753	0.532919
25	-0.06002669	9.09427260	-0.54589908		25.00000000	1.37360000	12.49189284	0.554301
26	-0.04987925	9.08696170	-0.45325079		26.00000000	1.32076923	12.00177941	0.575678
27	-0.04001612	9.09226320	-0.36383705		27.00000000	1.27185185	11.56401179	0.597173
28	-0.02989770	9.09181790	-0.27182440		28.00000000	1.22642857	11.15046524	0.618551
29	-0.02010527	9.07253270	-0.18240571		29.00000000	1.18413793	10.74313010	0.639908
30	-0.00999057	9.09688000	-0.09088304		30.00000000	1.14466667	10.41289531	0.661297
31	-0.00062387	9.10230350	-0.00567868		31.00000000	1.10774194	10.08300330	0.682910
32	0.00947648	9.09216500	0.08616169		32.00000000	1.07312500	9.75702957	0.704304
33	0.01935793	9.08743860	0.17591403		33.00000000	1.04060606	9.45644368	0.725674
34	0.02946043	9.08557800	0.26766507		34.00000000	1.01000000	9.17643378	0.747045
35	0.03928012	9.08118920	0.35671017		35.00000000	0.98114286	8.90994392	0.768526
36	0.04942057	9.08089830	0.44878320		36.00000000	0.95388889	8.66216799	0.789912
37	0.05925812	9.09675310	0.53905651		37.00000000	0.92810811	8.44277031	0.811270
38	0.06943207	9.08910270	0.63107523		38.00000000	0.90368421	8.21367860	0.832698
39	0.07956658	9.08920760	0.72319713		39.00000000	0.88051282	8.00316382	0.854186
40	0.08934532	9.07961180	0.81122083		40.00000000	0.85850000	7.79484673	0.875579
41	0.09949322	9.08427430	0.90382370		41.00000000	0.83756098	7.60863365	0.896939
42	0.10929281	9.09518240	0.99403804		42.00000000	0.81761905	7.43639437	0.918321
43	0.11946825	9.08594510	1.08548196		43.00000000	0.79860465	7.25607802	0.939798
44	0.12925668	9.08698650	1.17455371		44.00000000	0.78045455	7.09197992	0.961190
45	0.13943657	9.09669300	1.26841167		45.00000000	0.76311111	6.94178750	0.982540
46	0.14919002	9.07662300	1.35414157		46.00000000	0.74652174	6.77589639	1.003925
47	0.15941755	9.09793950	1.45037123		47.00000000	0.73063830	6.64730303	1.025404
48	0.16956247	9.07985400	1.53960247		48.00000000	0.71541667	6.49587888	1.046779
49	0.17937770	9.08546260	1.62972938		49.00000000	0.70081633	6.36724052	1.068138
50	0.18949434	9.08034420	1.72067383		50.00000000	0.68680000	6.23638040	1.089505
51	0.19928649	9.08710480	1.81093722		51.00000000	0.67333333	6.11865057	1.110989
52	0.20940685	9.08538910	1.90254271		52.00000000	0.66038462	5.99985119	1.132376
53	0.21926969	9.08217330	1.99144532		53.00000000	0.64792453	5.88456285	1.153769
54	0.22940345	9.08141230	2.08330731		54.00000000	0.63592593	5.77510553	1.175135
55	0.23922686	9.09366510	2.17544895		55.00000000	0.62436364	5.67775381	1.196622
56	0.24935988	9.07466890	2.26285835		56.00000000	0.61321429	5.56471661	1.218004
57	0.25953010	9.09460640	2.36032411		57.00000000	0.60245614	5.47910147	1.239384
58	0.26943985	9.07038780	2.44392393		58.00000000	0.59206897	5.37029512	1.260869
59	0.27951333	9.08912090	2.54053045		59.00000000	0.58203390	5.29017647	1.282255
60	0.28934342	9.09053990	2.63028790		60.00000000	0.57233333	5.20281900	1.303608
61	0.29946154	9.07400800	2.71731641		61.00000000	0.56295082	5.10822024	1.324992
62	0.30929539	9.07992080	2.80837765		62.00000000	0.55387097	5.02910452	1.346479
63	0.31945443	9.09172630	2.90439224		63.00000000	0.54507937	4.95571240	1.367851
64	0.32923767	9.07486250	2.98778659		64.00000000	0.53656250	4.86923091	1.389213
65	0.33945179	9.07988070	3.08218176		65.00000000	0.52830769	4.79697082	1.410600
66	0.34929082	9.08291820	3.17257995		66.00000000	0.52030303	4.72586986	1.432131
67	0.35940152	9.07754900	3.26248491		67.00000000	0.51253731	4.65258258	1.453510
68	0.36956728	9.08071140	3.35593381		68.00000000	0.50500000	4.58575926	1.474865
69	0.37928948	9.08477880	3.44576103		69.00000000	0.49768116	4.52132325	1.496253
70	0.38950732	9.08136750	3.53725912		70.00000000	0.49057143	4.45505943	1.517748
71	0.39933819	9.06789970	3.62115865		71.00000000	0.48366197	4.38579825	1.539122
72	0.40948829	9.07987400	3.71810208		72.00000000	0.47694444	4.33059546	1.560479
73	0.41929236	9.07366560	3.80451866		73.00000000	0.47041096	4.26835174	1.581850
74	0.42947972	9.06999400	3.89537848		74.00000000	0.46405405	4.20896749	1.603366
75	0.43926963	9.06159310	3.98048265		75.00000000	0.45786667	4.14900143	1.624760
76	0.44943240	9.05510230	4.06965636		76.00000000	0.45184211	4.09147649	1.646108
77	0.45954978	9.06745240	4.16694576		77.00000000	0.44597403	4.04384825	1.667479
78	0.46937990	9.06201840	4.25352929		78.00000000	0.44025641	3.98961169	1.688966
79	0.47951066	9.05516430	4.34204781		79.00000000	0.43468354	3.93613091	1.710355
80	0.48934898	9.03693390	4.42221439		80.00000000	0.42925000	3.87910388	1.731716
81	0.49949908	9.02901170	4.50998304		81.00000000	0.42395062	3.82785508	1.753099
82	0.50933963	9.01891610	4.59369139		82.00000000	0.41878049	3.77694608	1.774580
83	0.51949346	8.97616290	4.66305792		83.00000000	0.41373494	3.71375222	1.795965
84	0.52916580	8.95775220	4.74013611		84.00000000	0.40880952	3.66201441	1.817358
85	0.53938144	8.90860560	4.80513652		85.00000000	0.40400000	3.59907666	1.838713
86	0.54957324	8.84447570	4.86068717		86.00000000	0.39930233	3.53161972	1.860198
87	0.55937582	8.75650120	4.89817504		87.00000000	0.39471264	3.45630174	1.881586
88	0.56946641	8.61186410	4.90416733		88.00000000	0.39022727	3.36058424	1.902968
89	0.57924813	8.46319960	4.90229254		89.00000000	0.38584270	3.26546376	1.924461
90	0.58939976	8.20013620	4.83315831		90.00000000	0.38155556	3.12880752	1.945838
91	0.59924996	7.87214800	4.71738437		91.00000000	0.37736264	2.97065453	1.967202
92	0.60938740	7.42911010	4.52720609		92.00000000	0.37326087	2.77299610	1.988685
93	0.61914533	6.82598830	4.22627878		93.00000000	0.36924731	2.52047783	2.010197
94	0.62922776	6.02213190	3.78929257		94.00000000	0.36531915	2.20000010	2.031574
95	0.63942325	4.98216680	3.18571329		95.00000000	0.36147368	1.80092219	2.052926
96	0.64920944	3.72472450	2.41812631		96.00000000	0.35770833	1.33236499	2.074311
97	0.65922338	2.11820010	1.39636703		97.00000000	0.35402062	0.74988651	2.095789
98	0.66893888	0.22726408	0.15202578		98.00000000	0.35040816	0.07963519	2.117173
99	0.67906892	-2.08313060	-1.41458925		99.00000000	0.34686869	-0.72257278	2.138526
100	0.68886924	-4.70702890	-3.24252742		100.00000000	0.34340000	-1.61639372	2.159911
101	0.69895166	-7.84368710	-5.48235812		101.00000000	0.34000000	-2.66685361	2.181385
06:52 04/04/2018
Test Lot:	JK-PERC
Recipe:	Recipe_YJX-LID
Cell Name:	3-18-10h
Test Order:	4
Test Condition:	Light
1	-0.29994124	9.08905700	-2.72618303		1.00000000	34.34000000	312.11821738	0.000000
2	-0.29017043	9.09227940	-2.63831062		2.00000000	17.17000000	156.11443730	0.061752
3	-0.28000143	9.08158020	-2.54285544		3.00000000	11.44666667	103.95382136	0.083233
4	-0.27020383	9.09539510	-2.45761059		4.00000000	8.58500000	78.08396693	0.104667
5	-0.26005793	9.08874320	-2.36359974		5.00000000	6.86800000	62.42148830	0.126103
6	-0.24981226	9.07918070	-2.26809065		6.00000000	5.72333333	51.96317754	0.147503
7	-0.24008238	9.09201910	-2.18283358		7.00000000	4.90571429	44.60284798	0.169007
8	-0.22987618	9.08205410	-2.08774790		8.00000000	4.29250000	38.98471722	0.190428
9	-0.22004358	9.08062550	-1.99813334		9.00000000	3.81555556	34.64763107	0.211779
10	-0.20994902	9.07623860	-1.90554740		10.00000000	3.43400000	31.16780335	0.233159
11	-0.20009634	9.09379290	-1.81963468		11.00000000	3.12181818	28.38916802	0.254648
12	-0.19000028	9.08691880	-1.72651712		12.00000000	2.86166667	26.00373263	0.276017
13	-0.18020342	9.07569410	-1.63547112		13.00000000	2.64153846	23.97379503	0.297383
14	-0.17006345	9.09424210	-1.54659819		14.00000000	2.45285714	22.30687669	0.318761
15	-0.16021971	9.07930090	-1.45468296		15.00000000	2.28933333	20.78554619	0.340232
16	-0.15001722	9.07791040	-1.36184288		16.00000000	2.14625000	19.48346520	0.361621
17	-0.13990702	9.09167390	-1.27198900		17.00000000	2.02000000	18.36518128	0.382975
18	-0.13008039	9.07845970	-1.18092958		18.00000000	1.90777778	17.31968367	0.404341
19	-0.11995829	9.08849620	-1.09024046		19.00000000	1.80736842	16.42626103	0.425840
20	-0.11015920	9.09970950	-1.00241672		20.00000000	1.71700000	15.62420121	0.447215
21	-0.09992173	9.08977130	-0.90826564		21.00000000	1.63523810	14.86394031	0.468565
22	-0.09010105	9.07719330	-0.81786463		22.00000000	1.56090909	14.16867354	0.489945
23	-0.07998118	9.09666350	-0.72756186		23.00000000	1.49304348	13.58171411	0.511421
24	-0.07010543	9.08497330	-0.63690592		24.00000000	1.43083333	12.99908263	0.532815
25	-0.05994462	9.09270860	-0.54505892		25.00000000	1.37360000	12.48974453	0.554166
26	-0.04983740	9.08022210	-0.45253462		26.00000000	1.32076923	11.99287796	0.575541
27	-0.04001746	9.09499650	-0.36395869		27.00000000	1.27185185	11.56748814	0.597017
28	-0.02986708	9.08152200	-0.27123850		28.00000000	1.22642857	11.13783805	0.618385
29	-0.02007691	9.09591960	-0.18261800		29.00000000	1.18413793	10.77082342	0.639739
30	-0.00992429	9.08667560	-0.09017883		30.00000000	1.14466667	10.40121467	0.661123
31	-0.00066480	9.08812430	-0.00604177		31.00000000	1.10774194	10.06729640	0.682722
32	0.00944073	9.09463790	0.08586001		32.00000000	1.07312500	9.75968330	0.704104
33	0.01932885	9.07827950	0.17547271		33.00000000	1.04060606	9.44691267	0.725501
34	0.02943951	9.08912180	0.26757925		34.00000000	1.01000000	9.18001302	0.746845
35	0.03919962	9.08617500	0.35617458		35.00000000	0.98114286	8.91483570	0.768317
36	0.04940702	9.08158020	0.44869385		36.00000000	0.95388889	8.66281845	0.789721
37	0.05910983	9.08346650	0.53692215		37.00000000	0.92810811	8.43043891	0.811103
38	0.06935966	9.08094120	0.62985099		38.00000000	0.90368421	8.20630318	0.832529
39	0.07948445	9.09149550	0.72263250		39.00000000	0.88051282	8.00517835	0.853996
40	0.08930634	9.08340930	0.81120604		40.00000000	0.85850000	7.79810688	0.875369
41	0.09950928	9.08329770	0.90387238		41.00000000	0.83756098	7.60781568	0.896775
42	0.10924780	9.08809380	0.99285425		42.00000000	0.81761905	7.43059860	0.918152
43	0.11941874	9.08180050	1.08453717		43.00000000	0.79860465	7.25276812	0.939639
44	0.12925254	9.09012510	1.17492176		44.00000000	0.78045455	7.09442945	0.961035
45	0.13943166	9.08005330	1.26604690		45.00000000	0.76311111	6.92908956	0.982391
46	0.14927885	9.08791070	1.35663286		46.00000000	0.74652174	6.78432290	1.003751
47	0.15943044	9.06705950	1.44556529		47.00000000	0.73063830	6.62474092	1.025220
48	0.16952397	9.08738990	1.54053041		48.00000000	0.71541667	6.50127019	1.046602
49	0.17932279	9.07999320	1.62824971		49.00000000	0.70081633	6.36340748	1.067978
50	0.18948330	9.08932590	1.72227547		50.00000000	0.68680000	6.24254903	1.089324
51	0.19919653	9.08196450	1.80909581		51.00000000	0.67333333	6.11518943	1.110809
52	0.20943370	9.08249190	1.90217988		52.00000000	0.66038462	5.99793792	1.132185
53	0.21925187	9.08303930	1.99147335		53.00000000	0.64792453	5.88512395	1.153576
54	0.22942132	9.08380990	2.08401966		54.00000000	0.63592593	5.77663022	1.175050
55	0.23934814	9.08627510	2.17478304		55.00000000	0.62436364	5.67313976	1.196446
56	0.24933153	9.07125660	2.26175029		56.00000000	0.61321429	5.56262414	1.217787
57	0.25950024	9.08386520	2.35726520		57.00000000	0.60245614	5.47263037	1.239154
58	0.26946652	9.07021330	2.44411881		58.00000000	0.59206897	5.37019181	1.260643
59	0.27954143	9.09346100	2.54199909		59.00000000	0.58203390	5.29270255	1.282015
60	0.28931347	9.07272530	2.62486164		60.00000000	0.57233333	5.19262311	1.303364
61	0.29942039	9.08030510	2.71882849		61.00000000	0.56295082	5.11176520	1.324748
62	0.30934498	9.08170890	2.80938106		62.00000000	0.55387097	5.03009490	1.346230
63	0.31941247	9.07681270	2.89924716		63.00000000	0.54507937	4.94758330	1.367607
64	0.32926190	9.10032180	2.99638925		64.00000000	0.53656250	4.88289142	1.388974
65	0.33940977	9.06608490	3.07711779		65.00000000	0.52830769	4.78968239	1.410344
66	0.34917209	9.08465290	3.17210724		66.00000000	0.52030303	4.72677243	1.431826
67	0.35934451	9.08653350	3.26519593		67.00000000	0.51253731	4.65718747	1.453204
68	0.36951768	9.06932930	3.35127752		68.00000000	0.50500000	4.58001130	1.474551
69	0.37926590	9.07665730	3.44246660		69.00000000	0.49768116	4.51728133	1.495932
70	0.38955146	9.07309720	3.53443826		70.00000000	0.49057143	4.45100225	1.517421
71	0.39929891	9.07410050	3.62327844		71.00000000	0.48366197	4.38879734	1.538807
72	0.40941924	9.07375530	3.71497000		72.00000000	0.47694444	4.32767718	1.560166
73	0.41930366	9.07746320	3.80621354		73.00000000	0.47041096	4.27013817	1.581542
74	0.42937261	9.07216260	3.89533813		74.00000000	0.46405405	4.20997383	1.603024
75	0.43920866	9.05458830	3.97685359		75.00000000	0.45786667	4.14579416	1.624413
76	0.44939893	9.07285400	4.07733088		76.00000000	0.45184211	4.09949745	1.645773
77	0.45953712	9.06167410	4.16417562		77.00000000	0.44597403	4.04127128	1.667136
78	0.46945056	9.05642890	4.25154562		78.00000000	0.44025641	3.98715088	1.688616
79	0.47951877	9.03875540	4.33425287		79.00000000	0.43468354	3.92899823	1.709986
80	0.48939127	9.03421780	4.42126732		80.00000000	0.42925000	3.87793799	1.731372
81	0.49946919	9.02340030	4.50691044		81.00000000	0.42395062	3.82547613	1.752724
82	0.50928658	9.01191620	4.58964798		82.00000000	0.41878049	3.77401466	1.774197
83	0.51947987	8.97986410	4.66485864		83.00000000	0.41373494	3.71528353	1.795592
84	0.52919906	8.95132450	4.73703251		84.00000000	0.40880952	3.65938671	1.816968
85	0.53931713	8.90077400	4.80033989		85.00000000	0.40400000	3.59591270	1.838444
86	0.54952383	8.84251020	4.85917007		86.00000000	0.39930233	3.53083489	1.859833
87	0.55928916	8.74442390	4.89066150		87.00000000	0.39471264	3.45153468	1.881187
88	0.56949800	8.61444470	4.90590903		88.00000000	0.39022727	3.36159126	1.902567
89	0.57927454	8.46917060	4.90597490		89.00000000	0.38584270	3.26776762	1.924059
90	0.58941644	8.19917110	4.83272624		90.00000000	0.38155556	3.12843928	1.945429
91	0.59920257	7.87578730	4.71919199		91.00000000	0.37736264	2.97202787	1.966768
92	0.60930800	7.41689730	4.51917486		92.00000000	0.37326087	2.76843754	1.988245
93	0.61914480	6.82277110	4.22428325		93.00000000	0.36924731	2.51928989	2.009751
94	0.62926733	6.02568100	3.79176419		94.00000000	0.36531915	2.20129665	2.031129
95	0.63929093	4.98457430	3.18659314		95.00000000	0.36147368	1.80179244	2.052506
96	0.64913589	3.72936420	2.42086415		96.00000000	0.35770833	1.33402465	2.073882
97	0.65928674	2.10007070	1.38454877		97.00000000	0.35402062	0.74346833	2.095363
98	0.66896051	0.22239685	0.14877471		98.00000000	0.35040816	0.07792967	2.116749
99	0.67912477	-2.11170340	-1.43411009		99.00000000	0.34686869	-0.73248379	2.138147
100	0.68886256	-4.73961830	-3.26494560		100.00000000	0.34340000	-1.62758492	2.159538
101	0.69899553	-7.91109990	-5.52982347		101.00000000	0.34000000	-2.68977397	2.181027
