# Supplementary material for: Study on the Electrical Injection Regeneration of Industrialized B-Doped Czochralski Silicon PERC Solar Cells
Source: Hindawi journal article supplement (doi:10.1155/2019/5357370), 2019-06-20
Supplement: f1 [file 5357370.f1.zip › section3.3/IVRawData_3-18-11h.csv]

07:53 04/04/2018
Test Lot:	JK-PERC
Recipe:	Recipe_YJX-LID
Cell Name:	3-18-11h
Test Order:	2
Test Condition:	Light
1	-0.29989901	9.09128380	-2.72646701		1.00000000	34.34000000	312.19468569	0.000000
2	-0.29010957	9.09364700	-2.63815402		2.00000000	17.17000000	156.13791899	0.061791
3	-0.27991378	9.07665250	-2.54068011		3.00000000	11.44666667	103.89741562	0.083215
4	-0.27015337	9.09787750	-2.45782227		4.00000000	8.58500000	78.10527834	0.104566
5	-0.26004094	9.08159260	-2.36158588		5.00000000	6.86800000	62.37237798	0.126059
6	-0.24986450	9.08956810	-2.27116039		6.00000000	5.72333333	52.02262809	0.147434
7	-0.23994038	9.07102870	-2.17650607		7.00000000	4.90571429	44.49987508	0.168806
8	-0.22979370	9.10326960	-2.09187400		8.00000000	4.29250000	39.07578476	0.190291
9	-0.22008540	9.08290290	-1.99901432		9.00000000	3.81555556	34.65632062	0.211725
10	-0.20985611	9.09198280	-1.90800814		10.00000000	3.43400000	31.22186894	0.233079
11	-0.20010985	9.08651260	-1.81830067		11.00000000	3.12181818	28.36644024	0.254468
12	-0.18993193	9.07850550	-1.72429807		12.00000000	2.86166667	25.97965657	0.275810
13	-0.18012241	9.08588500	-1.63657150		13.00000000	2.64153846	24.00071468	0.297299
14	-0.17000327	9.08092210	-1.54378645		14.00000000	2.45285714	22.27420464	0.318687
15	-0.16015877	9.09203340	-1.45616889		15.00000000	2.28933333	20.81469513	0.340081
16	-0.14998531	9.08269210	-1.36227039		16.00000000	2.14625000	19.49372792	0.361425
17	-0.13986394	9.07815840	-1.26970700		17.00000000	2.02000000	18.33787997	0.382909
18	-0.13005219	9.07906630	-1.18075246		18.00000000	1.90777778	17.32084093	0.404279
19	-0.11995687	9.09067820	-1.09048930		19.00000000	1.80736842	16.43020470	0.425665
20	-0.11007813	9.08951280	-1.00055657		20.00000000	1.71700000	15.60669348	0.447014
21	-0.09993146	9.06884570	-0.90626303		21.00000000	1.63523810	14.82972197	0.468486
22	-0.09010483	9.09599880	-0.81959339		22.00000000	1.56090909	14.19802722	0.489875
23	-0.07999685	9.08680150	-0.72691553		23.00000000	1.49304348	13.56698972	0.511267
24	-0.07012557	9.08579160	-0.63714627		24.00000000	1.43083333	13.00025348	0.532737
25	-0.06001908	9.07717700	-0.54480381		25.00000000	1.37360000	12.46841033	0.554114
26	-0.04981659	9.09587860	-0.45312562		26.00000000	1.32076923	12.01355658	0.575456
27	-0.04003684	9.08491900	-0.36373144		27.00000000	1.27185185	11.55467105	0.596830
28	-0.02989910	9.08527280	-0.27164146		28.00000000	1.22642857	11.14243814	0.618322
29	-0.02004790	9.07806970	-0.18199624		29.00000000	1.18413793	10.74968667	0.639690
30	-0.00990644	9.08956810	-0.09004524		30.00000000	1.14466667	10.40452562	0.661032
31	-0.00062386	9.07301140	-0.00566033		31.00000000	1.10774194	10.05055521	0.682525
32	0.00952111	9.08442120	0.08649379		32.00000000	1.07312500	9.74871950	0.704014
33	0.01931621	9.07770060	0.17534676		33.00000000	1.04060606	9.44631026	0.725395
34	0.02947152	9.09104350	0.26792691		34.00000000	1.01000000	9.18195394	0.746753
35	0.03928746	9.07953170	0.35671173		35.00000000	0.98114286	8.90831767	0.768120
36	0.04939887	9.08349700	0.44871445		36.00000000	0.95388889	8.66464686	0.789588
37	0.05922373	9.07900620	0.53769261		37.00000000	0.92810811	8.42629927	0.810969
38	0.06939393	9.07488060	0.62974166		38.00000000	0.90368421	8.20082631	0.832314
39	0.07958125	9.08741190	0.72318756		39.00000000	0.88051282	8.00158268	0.853691
40	0.08930043	9.08708000	0.81148016		40.00000000	0.85850000	7.80125818	0.875172
41	0.09946989	9.07637880	0.90282636		41.00000000	0.83756098	7.60202068	0.896548
42	0.10935950	9.07980060	0.99296245		42.00000000	0.81761905	7.42381792	0.917907
43	0.11951184	9.08734510	1.08604533		43.00000000	0.79860465	7.25719606	0.939273
44	0.12931736	9.06349850	1.17206770		44.00000000	0.78045455	7.07364860	0.960741
45	0.13940421	9.09561160	1.26796655		45.00000000	0.76311111	6.94096227	0.982125
46	0.14928043	9.06658650	1.35346393		46.00000000	0.74652174	6.76840392	1.003502
47	0.15940002	9.08677770	1.44843255		47.00000000	0.73063830	6.63914779	1.024880
48	0.16955757	9.08109570	1.53976852		48.00000000	0.71541667	6.49676722	1.046353
49	0.17940253	9.08711530	1.63025148		49.00000000	0.70081633	6.36839876	1.067728
50	0.18952435	9.07622910	1.72016642		50.00000000	0.68680000	6.23355415	1.089116
51	0.19929712	9.09045410	1.81170132		51.00000000	0.67333333	6.12090576	1.110466
52	0.20941076	9.07236390	1.89985062		52.00000000	0.66038462	5.99124954	1.131942
53	0.21925497	9.08503910	1.99193998		53.00000000	0.64792453	5.88641967	1.153325
54	0.22937383	9.07802300	2.08226090		54.00000000	0.63592593	5.77295018	1.174707
55	0.23922102	9.09582810	2.17591328		55.00000000	0.62436364	5.67910431	1.196191
56	0.24941131	9.07178780	2.26260648		56.00000000	0.61321429	5.56294988	1.217577
57	0.25953910	9.07822990	2.35615562		57.00000000	0.60245614	5.46923535	1.238934
58	0.26932079	9.08940790	2.44796652		58.00000000	0.59206897	5.38155633	1.260313
59	0.27956617	9.07279110	2.53644546		59.00000000	0.58203390	5.28067197	1.281788
60	0.28937241	9.07898430	2.62720757		60.00000000	0.57233333	5.19620535	1.303173
61	0.29953146	9.08042620	2.71987332		61.00000000	0.56295082	5.11183337	1.324530
62	0.30930722	9.07863520	2.80808742		62.00000000	0.55387097	5.02839246	1.345903
63	0.31946996	9.08384230	2.90201474		63.00000000	0.54507937	4.95141499	1.367382
64	0.32932982	9.07205490	2.98769821		64.00000000	0.53656250	4.86772446	1.388764
65	0.33941814	9.08246900	3.08275473		65.00000000	0.52830769	4.79833824	1.410105
66	0.34923780	9.08456800	3.17267454		66.00000000	0.52030303	4.72672826	1.431468
67	0.35942364	9.06775280	3.25916472		67.00000000	0.51253731	4.64756166	1.452937
68	0.36953056	9.07226180	3.35247798		68.00000000	0.50500000	4.58149221	1.474303
69	0.37942243	9.07618900	3.44370969		69.00000000	0.49768116	4.51704826	1.495653
70	0.38952488	9.07536410	3.53508011		70.00000000	0.49057143	4.45211433	1.517030
71	0.39939144	9.07192990	3.62325115		71.00000000	0.48366197	4.38774750	1.538507
72	0.40947604	9.06688500	3.71267216		72.00000000	0.47694444	4.32440043	1.559885
73	0.41926742	9.07421300	3.80452187		73.00000000	0.47041096	4.26860924	1.581240
74	0.42943019	9.06320000	3.89201170		74.00000000	0.46405405	4.20581470	1.602614
75	0.43928111	9.07357880	3.98585177		75.00000000	0.45786667	4.15448928	1.624087
76	0.44943047	9.05727390	4.07061487		76.00000000	0.45184211	4.09245771	1.645470
77	0.45957908	9.05922130	4.16342859		77.00000000	0.44597403	4.04017740	1.666830
78	0.46943519	9.05031780	4.24853766		78.00000000	0.44025641	3.98446043	1.688197
79	0.47955555	9.04843710	4.33922823		79.00000000	0.43468354	3.93320671	1.709676
80	0.48936924	9.02267270	4.41541848		80.00000000	0.42925000	3.87298226	1.731051
81	0.49945831	9.02542690	4.50782447		81.00000000	0.42395062	3.82633531	1.752443
82	0.50933975	9.01613430	4.59227559		82.00000000	0.41878049	3.77578112	1.773787
83	0.51947868	8.97540190	4.66252993		83.00000000	0.41373494	3.71343736	1.795259
84	0.52927381	8.95162200	4.73785908		84.00000000	0.40880952	3.65950833	1.816644
85	0.53941423	8.90935990	4.80583551		85.00000000	0.40400000	3.59938140	1.838028
86	0.54956061	8.82035160	4.84731781		86.00000000	0.39930233	3.52198691	1.859496
87	0.55935717	8.75029750	4.89454165		87.00000000	0.39471264	3.45385306	1.880878
88	0.56956458	8.59863660	4.89747884		88.00000000	0.39022727	3.35542251	1.902228
89	0.57928824	8.44680020	4.89313202		89.00000000	0.38584270	3.25913617	1.923596
90	0.58953810	8.16988750	4.81645995		90.00000000	0.38155556	3.11726596	1.945080
91	0.59924835	7.85500290	4.70709753		91.00000000	0.37736264	2.96418461	1.966452
92	0.60932845	7.37437920	4.49341905		92.00000000	0.37326087	2.75256719	1.987924
93	0.61914366	6.78821040	4.20287743		93.00000000	0.36924731	2.50652844	2.009364
94	0.62929970	5.96668530	3.75483327		94.00000000	0.36531915	2.17974440	2.030874
95	0.63938510	4.93473720	3.15519744		95.00000000	0.36147368	1.78377764	2.052260
96	0.64915937	3.67429140	2.38520069		96.00000000	0.35770833	1.31432465	2.073600
97	0.65926701	2.08660980	1.37563300		97.00000000	0.35402062	0.73870289	2.094974
98	0.66900480	0.20623672	0.13797336		98.00000000	0.35040816	0.07226703	2.116458
99	0.67911029	-2.05733370	-1.39715649		99.00000000	0.34686869	-0.71362464	2.137835
100	0.68884659	-4.61341760	-3.17793698		100.00000000	0.34340000	-1.58424760	2.159177
101	0.69903386	-7.67888450	-5.36780027		101.00000000	0.34000000	-2.61082073	2.180557
07:53 04/04/2018
Test Lot:	JK-PERC
Recipe:	Recipe_YJX-LID
Cell Name:	3-18-11h
Test Order:	3
Test Condition:	Light
1	-0.29988950	9.09278770	-2.72683156		1.00000000	34.34000000	312.24632962	0.000000
2	-0.29011667	9.08169840	-2.63475210		2.00000000	17.17000000	155.93276153	0.061791
3	-0.27998063	9.07967850	-2.54213411		3.00000000	11.44666667	103.93205323	0.083248
4	-0.27015197	9.09849550	-2.45797648		4.00000000	8.58500000	78.11058387	0.104750
5	-0.25998691	9.09119220	-2.36359097		5.00000000	6.86800000	62.43830803	0.126130
6	-0.24984194	9.08385280	-2.26952741		6.00000000	5.72333333	51.98991753	0.147515
7	-0.23995598	9.08327010	-2.17958498		7.00000000	4.90571429	44.55992789	0.168875
8	-0.22982441	9.09476090	-2.09019806		8.00000000	4.29250000	39.03926116	0.190356
9	-0.22003594	9.07866570	-1.99763274		9.00000000	3.81555556	34.64015335	0.211730
10	-0.20985526	9.09170340	-1.90794178		10.00000000	3.43400000	31.22090948	0.233118
11	-0.20006157	9.07543950	-1.81564667		11.00000000	3.12181818	28.33187204	0.254598
12	-0.18988313	9.09099390	-1.72622638		12.00000000	2.86166667	26.01539421	0.275988
13	-0.18011996	9.07130240	-1.63392263		13.00000000	2.64153846	23.96219419	0.297325
14	-0.16999583	9.07821850	-1.54325929		14.00000000	2.45285714	22.26757309	0.318713
15	-0.16014113	9.08307170	-1.45457337		15.00000000	2.28933333	20.79417881	0.340200
16	-0.14998202	9.07887740	-1.36166837		16.00000000	2.14625000	19.48554062	0.361570
17	-0.13987203	9.08186530	-1.27029894		17.00000000	2.02000000	18.34536791	0.382909
18	-0.13004859	9.08452510	-1.18142968		18.00000000	1.90777778	17.33125511	0.404278
19	-0.11991926	9.08454990	-1.08941250		19.00000000	1.80736842	16.41912861	0.425767
20	-0.11009060	9.08234410	-0.99988071		20.00000000	1.71700000	15.59438482	0.447155
21	-0.09990618	9.07900430	-0.90704867		21.00000000	1.63523810	14.84633370	0.468516
22	-0.09007455	9.08008290	-0.81788442		22.00000000	1.56090909	14.17318394	0.489883
23	-0.07999062	9.08102040	-0.72639643		23.00000000	1.49304348	13.55835828	0.511365
24	-0.07017833	9.08222870	-0.63737564		24.00000000	1.43083333	12.99515556	0.532758
25	-0.05996787	9.06664280	-0.54370727		25.00000000	1.37360000	12.45394055	0.554104
26	-0.04981472	9.08795640	-0.45271400		26.00000000	1.32076923	12.00309318	0.575489
27	-0.04004411	9.08279990	-0.36371267		27.00000000	1.27185185	11.55197587	0.596969
28	-0.02989096	9.09795480	-0.27194662		28.00000000	1.22642857	11.15799171	0.618353
29	-0.02007570	9.06597520	-0.18200581		29.00000000	1.18413793	10.73536512	0.639724
30	-0.00990320	9.08988380	-0.09001893		30.00000000	1.14466667	10.40488699	0.661096
31	-0.00065209	9.07317640	-0.00591649		31.00000000	1.10774194	10.05073799	0.682688
32	0.00944876	9.08896640	0.08587949		32.00000000	1.07312500	9.75359707	0.704083
33	0.01933593	9.08408260	0.17564921		33.00000000	1.04060606	9.45295141	0.725447
34	0.02946349	9.08286670	0.26761297		34.00000000	1.01000000	9.17369537	0.746805
35	0.03928592	9.08493900	0.35691016		35.00000000	0.98114286	8.91362301	0.768280
36	0.04945441	9.08160310	0.44912529		36.00000000	0.95388889	8.66284029	0.789665
37	0.05926418	9.09070210	0.53875300		37.00000000	0.92810811	8.43715433	0.811046
38	0.06939621	9.08402630	0.63039695		38.00000000	0.90368421	8.20909114	0.832409
39	0.07958405	9.09259410	0.72362544		39.00000000	0.88051282	8.00614568	0.853896
40	0.08941837	9.07983880	0.81190442		40.00000000	0.85850000	7.79504161	0.875276
41	0.09952435	9.07521630	0.90320499		41.00000000	0.83756098	7.60104702	0.896668
42	0.10932668	9.08497430	0.99323008		42.00000000	0.81761905	7.42804803	0.918155
43	0.11948103	9.08198830	1.08512532		43.00000000	0.79860465	7.25291810	0.939556
44	0.12933546	9.08274270	1.17472071		44.00000000	0.78045455	7.08866783	0.960900
45	0.13943101	9.08842180	1.26720783		45.00000000	0.76311111	6.93547566	0.982280
46	0.14928098	9.07467840	1.35467688		46.00000000	0.74652174	6.77444470	1.003763
47	0.15935643	9.09347530	1.44910376		47.00000000	0.73063830	6.64404131	1.025144
48	0.16958000	9.06999870	1.53809038		48.00000000	0.71541667	6.48882824	1.046492
49	0.17937712	9.08455370	1.62956108		49.00000000	0.70081633	6.36660355	1.067877
50	0.18954115	9.08486750	1.72195623		50.00000000	0.68680000	6.23948700	1.089364
51	0.19930477	9.07135580	1.80796448		51.00000000	0.67333333	6.10804624	1.110741
52	0.20942861	9.08012100	1.90163712		52.00000000	0.66038462	5.99637221	1.132103
53	0.21927857	9.06508920	1.98777980		53.00000000	0.64792453	5.87349364	1.153478
54	0.22939794	9.07626060	2.08207548		54.00000000	0.63592593	5.77182943	1.174945
55	0.23925757	9.08787630	2.17434320		55.00000000	0.62436364	5.67413949	1.196320
56	0.24943203	9.08070660	2.26501908		56.00000000	0.61321429	5.56841901	1.217673
57	0.25956330	9.07466890	2.35545101		57.00000000	0.60245614	5.46709000	1.239053
58	0.26934925	9.07858560	2.44531022		58.00000000	0.59206897	5.37514878	1.260532
59	0.27953488	9.07835200	2.53771604		59.00000000	0.58203390	5.28390860	1.281900
60	0.28933275	9.08069710	2.62734306		60.00000000	0.57233333	5.19718564	1.303257
61	0.29947442	9.08032610	2.71932539		61.00000000	0.56295082	5.11177702	1.324641
62	0.30929685	9.07118230	2.80568811		62.00000000	0.55387097	5.02426452	1.346118
63	0.31941324	9.07438470	2.89847862		63.00000000	0.54507937	4.94625985	1.367498
64	0.32926098	9.07602690	2.98838151		64.00000000	0.53656250	4.86985568	1.388853
65	0.33940789	9.07724190	3.08088752		65.00000000	0.52830769	4.79557672	1.410210
66	0.34925264	9.06061650	3.16444423		66.00000000	0.52030303	4.71426622	1.431683
67	0.35941368	9.07778640	3.26268062		67.00000000	0.51253731	4.65270425	1.453068
68	0.36950776	9.07406140	3.35293610		68.00000000	0.50500000	4.58240101	1.474444
69	0.37936071	9.07454490	3.44252580		69.00000000	0.49768116	4.51623003	1.495791
70	0.38952771	9.08450510	3.53866647		70.00000000	0.49057143	4.45659864	1.517267
71	0.39934862	9.06534770	3.62023409		71.00000000	0.48366197	4.38456394	1.538644
72	0.40949181	9.07630920	3.71667428		72.00000000	0.47694444	4.32889525	1.560022
73	0.41929713	9.07580180	3.80545765		73.00000000	0.47041096	4.26935663	1.581503
74	0.42946711	9.04707530	3.88542128		74.00000000	0.46405405	4.19833197	1.602889
75	0.43925157	9.08265780	3.98957170		75.00000000	0.45786667	4.15864625	1.624234
76	0.44942155	9.05125050	4.06782703		76.00000000	0.45184211	4.08973608	1.645605
77	0.45956549	9.05802630	4.16275629		77.00000000	0.44597403	4.03964446	1.667089
78	0.46943703	9.05425930	4.25040459		78.00000000	0.44025641	3.98619570	1.688485
79	0.47961220	9.03695110	4.33423200		79.00000000	0.43468354	3.92821393	1.709836
80	0.48935276	9.02286240	4.41536262		80.00000000	0.42925000	3.87306369	1.731216
81	0.49949521	9.02938940	4.51013675		81.00000000	0.42395062	3.82801521	1.752703
82	0.50934666	8.99661920	4.58239794		82.00000000	0.41878049	3.76760858	1.774093
83	0.51951814	8.98355480	4.66711968		83.00000000	0.41373494	3.71681050	1.795449
84	0.52923489	8.95154860	4.73747184		84.00000000	0.40880952	3.65947832	1.816834
85	0.53938997	8.89767270	4.79931541		85.00000000	0.40400000	3.59465977	1.838306
86	0.54951900	8.84421250	4.86006281		86.00000000	0.39930233	3.53151462	1.859691
87	0.55941588	8.74102120	4.88986607		87.00000000	0.39471264	3.45019159	1.881031
88	0.56950176	8.62622830	4.91265220		88.00000000	0.39022727	3.36618954	1.902414
89	0.57931674	8.43982700	4.88933306		89.00000000	0.38584270	3.25644561	1.923907
90	0.58944279	8.18326760	4.82356809		90.00000000	0.38155556	3.12237122	1.945284
91	0.59926152	7.88133000	4.72297780		91.00000000	0.37736264	2.97411947	1.966652
92	0.60934514	7.39578250	4.50658412		92.00000000	0.37326087	2.76055621	1.988130
93	0.61913258	6.81498810	4.21938117		93.00000000	0.36924731	2.51641604	2.009648
94	0.62925720	6.00475120	3.77853293		94.00000000	0.36531915	2.19365060	2.031042
95	0.63941079	4.96267130	3.17318558		95.00000000	0.36147368	1.79387508	2.052410
96	0.64919150	3.70738270	2.40680134		96.00000000	0.35770833	1.32616169	2.073831
97	0.65929753	2.09189870	1.37918365		97.00000000	0.35402062	0.74057527	2.095325
98	0.66895843	0.21120980	0.14129058		98.00000000	0.35040816	0.07400964	2.116718
99	0.67910904	-2.10828450	-1.43175506		99.00000000	0.34686869	-0.73129788	2.138110
100	0.68885183	-4.71369600	-3.24703812		100.00000000	0.34340000	-1.61868321	2.159468
101	0.69905531	-7.86565540	-5.49852817		101.00000000	0.34000000	-2.67432284	2.180949
07:54 04/04/2018
Test Lot:	JK-PERC
Recipe:	Recipe_YJX-LID
Cell Name:	3-18-11h
Test Order:	4
Test Condition:	Light
1	-0.29989052	9.06996150	-2.71999547		1.00000000	34.34000000	311.46247791	0.000000
2	-0.29008028	9.08038520	-2.63404068		2.00000000	17.17000000	155.91021388	0.061769
3	-0.27992100	9.07615850	-2.54060736		3.00000000	11.44666667	103.89176096	0.083265
4	-0.27011821	9.07439900	-2.45116041		4.00000000	8.58500000	77.90371542	0.104692
5	-0.25991648	9.08417030	-2.36112557		5.00000000	6.86800000	62.39008162	0.126052
6	-0.24983461	9.07864190	-2.26815896		6.00000000	5.72333333	51.96009381	0.147438
7	-0.23997898	9.09680560	-2.18304213		7.00000000	4.90571429	44.62632919	0.168927
8	-0.22983383	9.08675580	-2.08844389		8.00000000	4.29250000	39.00489927	0.190321
9	-0.22006528	9.07884880	-1.99793940		9.00000000	3.81555556	34.64085198	0.211678
10	-0.20990896	9.09111980	-1.90830750		10.00000000	3.43400000	31.21890539	0.233050
11	-0.20009205	9.07725140	-1.81628584		11.00000000	3.12181818	28.33752846	0.254528
12	-0.18992755	9.08305550	-1.72512248		12.00000000	2.86166667	25.99267716	0.275913
13	-0.18014857	9.08741000	-1.63708392		13.00000000	2.64153846	24.00474303	0.297244
14	-0.17001905	9.07267000	-1.54252673		14.00000000	2.45285714	22.25396341	0.318621
15	-0.16017236	9.08070760	-1.45447837		15.00000000	2.28933333	20.78876660	0.340107
16	-0.15004134	9.09461980	-1.36456894		16.00000000	2.14625000	19.51932775	0.361481
17	-0.13988578	9.07857990	-1.26996423		17.00000000	2.02000000	18.33873140	0.382821
18	-0.13006438	9.08698080	-1.18189252		18.00000000	1.90777778	17.33594004	0.404194
19	-0.11989914	9.07804390	-1.08844966		19.00000000	1.80736842	16.40736987	0.425672
20	-0.11008817	9.09152220	-1.00086904		20.00000000	1.71700000	15.61014362	0.447069
21	-0.09994078	9.07819080	-0.90728151		21.00000000	1.63523810	14.84500343	0.468414
22	-0.09016405	9.09153560	-0.81972967		22.00000000	1.56090909	14.19106057	0.489784
23	-0.07995117	9.08693410	-0.72651099		23.00000000	1.49304348	13.56718770	0.511257
24	-0.07020272	9.08354660	-0.63768964		24.00000000	1.43083333	12.99704126	0.532638
25	-0.05999654	9.07549760	-0.54449844		25.00000000	1.37360000	12.46610350	0.553993
26	-0.04984618	9.09016510	-0.45310997		26.00000000	1.32076923	12.00601037	0.575372
27	-0.04009847	9.07589150	-0.36392936		27.00000000	1.27185185	11.54318941	0.596856
28	-0.02990197	9.08399870	-0.27162941		28.00000000	1.22642857	11.14087555	0.618227
29	-0.02004782	9.08780860	-0.18219078		29.00000000	1.18413793	10.76121887	0.639586
30	-0.00990491	9.07753850	-0.08991218		30.00000000	1.14466667	10.39075574	0.660964
31	-0.00063279	9.08362290	-0.00574799		31.00000000	1.10774194	10.06231001	0.682553
32	0.00949280	9.07360650	0.08613397		32.00000000	1.07312500	9.73711398	0.703937
33	0.01930499	9.07915400	0.17527293		33.00000000	1.04060606	9.44782268	0.725324
34	0.02947441	9.08983330	0.26791745		34.00000000	1.01000000	9.18073163	0.746674
35	0.03931710	9.09335420	0.35752433		35.00000000	0.98114286	8.92187952	0.768154
36	0.04938307	9.07302380	0.44805381		36.00000000	0.95388889	8.65465659	0.789524
37	0.05925851	9.08009820	0.53807312		37.00000000	0.92810811	8.42731276	0.810922
38	0.06939668	9.08967110	0.63079295		38.00000000	0.90368421	8.21419225	0.832325
39	0.07951028	9.07868670	0.72184891		39.00000000	0.88051282	7.99390003	0.853787
40	0.08940359	9.07772730	0.81158136		40.00000000	0.85850000	7.79322889	0.875176
41	0.09952016	9.07710460	0.90335492		41.00000000	0.83756098	7.60262858	0.896536
42	0.10930927	9.08965780	0.99358386		42.00000000	0.81761905	7.43187735	0.917896
43	0.11946902	9.08039860	1.08482632		43.00000000	0.79860465	7.25164856	0.939376
44	0.12934148	9.08021350	1.17444825		44.00000000	0.78045455	7.08669390	0.960757
45	0.13947593	9.08082100	1.26655595		45.00000000	0.76311111	6.92967540	0.982117
46	0.14921889	9.07456110	1.35409593		46.00000000	0.74652174	6.77435713	1.003485
47	0.15937045	9.09087750	1.44881724		47.00000000	0.73063830	6.64214326	1.024966
48	0.16953689	9.07070640	1.53781935		48.00000000	0.71541667	6.48933454	1.046343
49	0.17937140	9.09710120	1.63175978		49.00000000	0.70081633	6.37539705	1.067734
50	0.18952444	9.06974320	1.71893800		50.00000000	0.68680000	6.22909963	1.089077
51	0.19930388	9.08862300	1.81139783		51.00000000	0.67333333	6.11967282	1.110552
52	0.20942493	9.07691290	1.90093185		52.00000000	0.66038462	5.99425363	1.131925
53	0.21926762	9.08337970	1.99169105		53.00000000	0.64792453	5.88534451	1.153302
54	0.22944151	9.07504180	2.08219129		54.00000000	0.63592593	5.77105436	1.174773
55	0.23921722	9.08538910	2.17338152		55.00000000	0.62436364	5.67258658	1.196153
56	0.24937846	9.07968330	2.26427744		56.00000000	0.61321429	5.56779151	1.217493
57	0.25955606	9.07734970	2.35608112		57.00000000	0.60245614	5.46870506	1.238879
58	0.26935261	9.08180900	2.44620896		58.00000000	0.59206897	5.37705726	1.260357
59	0.27949822	9.08200260	2.53840356		59.00000000	0.58203390	5.28603338	1.281720
60	0.28935432	9.08018880	2.62739186		60.00000000	0.57233333	5.19689472	1.303090
61	0.29948205	9.07551770	2.71795465		61.00000000	0.56295082	5.10907013	1.324471
62	0.30931285	9.08647540	2.81056360		62.00000000	0.55387097	5.03273492	1.345944
63	0.31946811	9.06713960	2.89666195		63.00000000	0.54507937	4.94231070	1.367325
64	0.32929146	9.07750510	2.98914491		64.00000000	0.53656250	4.87064883	1.388666
65	0.33941922	9.07812120	3.08128882		65.00000000	0.52830769	4.79604126	1.410042
66	0.34920162	9.07715990	3.16975894		66.00000000	0.52030303	4.72287380	1.431518
67	0.35938519	9.06991860	3.25959442		67.00000000	0.51253731	4.64867171	1.452891
68	0.36954641	9.07288360	3.35285156		68.00000000	0.50500000	4.58180622	1.474245
69	0.37938836	9.08219620	3.44567952		69.00000000	0.49768116	4.52003793	1.495614
70	0.38950494	9.06712440	3.53168975		70.00000000	0.49057143	4.44807217	1.517090
71	0.39931935	9.07566930	3.62409037		71.00000000	0.48366197	4.38955611	1.538463
72	0.40949100	9.08289530	3.71936388		72.00000000	0.47694444	4.33203645	1.559823
73	0.41930023	9.07546040	3.80534263		73.00000000	0.47041096	4.26919603	1.581191
74	0.42944807	9.06307790	3.89212131		74.00000000	0.46405405	4.20575804	1.602666
75	0.43928108	9.06880660	3.98375516		75.00000000	0.45786667	4.15230425	1.624044
76	0.44940585	9.05305100	4.06849408		76.00000000	0.45184211	4.09054962	1.645441
77	0.45958346	9.05638030	4.16216259		77.00000000	0.44597403	4.03891038	1.666809
78	0.46944252	9.05285740	4.24979619		78.00000000	0.44025641	3.98557850	1.688278
79	0.47955909	9.03580000	4.33320003		79.00000000	0.43468354	3.92771357	1.709662
80	0.48940328	9.04534720	4.42682259		80.00000000	0.42925000	3.88271529	1.731050
81	0.49951389	9.00607680	4.49866046		81.00000000	0.42395062	3.81813182	1.752394
82	0.50930750	9.02123550	4.59458290		82.00000000	0.41878049	3.77791740	1.773862
83	0.51950669	8.97213170	4.66108244		83.00000000	0.41373494	3.71208437	1.795235
84	0.52923030	8.94716360	4.73511008		84.00000000	0.40880952	3.65768569	1.816626
85	0.53940415	8.90993310	4.80605489		85.00000000	0.40400000	3.59961297	1.838116
86	0.54955125	8.82280250	4.84858214		86.00000000	0.39930233	3.52296556	1.859495
87	0.55933589	8.76104350	4.90036606		87.00000000	0.39471264	3.45809464	1.880835
88	0.56947035	8.61619000	4.90666473		88.00000000	0.39022727	3.36227233	1.902212
89	0.57927287	8.44506650	4.89199791		89.00000000	0.38584270	3.25846723	1.923687
90	0.58942068	8.18529030	4.82457937		90.00000000	0.38155556	3.12314299	1.945125
91	0.59919792	7.88649080	4.72556888		91.00000000	0.37736264	2.97606697	1.966499
92	0.60933083	7.39687820	4.50714593		92.00000000	0.37326087	2.76096519	1.987984
93	0.61913484	6.80987410	4.21623031		93.00000000	0.36924731	2.51452771	2.009479
94	0.62930501	6.00995680	3.78209592		94.00000000	0.36531915	2.19555230	2.030858
95	0.63938439	4.97437050	3.18053485		95.00000000	0.36147368	1.79810403	2.052203
96	0.64916527	3.70375820	2.40435119		96.00000000	0.35770833	1.32486517	2.073634
97	0.65927070	2.08612820	1.37532320		97.00000000	0.35402062	0.73853240	2.095134
98	0.66898245	0.19427949	0.12996957		98.00000000	0.35040816	0.06807712	2.116511
99	0.67911017	-2.12894610	-1.44578895		99.00000000	0.34686869	-0.73846474	2.137861
100	0.68886280	-4.74922850	-3.27156684		100.00000000	0.34340000	-1.63088507	2.159242
101	0.69908357	-7.91034510	-5.52999229		101.00000000	0.34000000	-2.68951733	2.180714
