# Supplementary material for: Study on the Electrical Injection Regeneration of Industrialized B-Doped Czochralski Silicon PERC Solar Cells
Source: Hindawi journal article supplement (doi:10.1155/2019/5357370), 2019-06-20
Supplement: f1 [file 5357370.f1.zip › section3.3/IVRawData_3-18-12h.csv]

08:55 04/04/2018
Test Lot:	JK-PERC
Recipe:	Recipe_YJX-LID
Cell Name:	3-18-12h
Test Order:	2
Test Condition:	Light
1	-0.29999495	9.06549640	-2.71960314		1.00000000	34.34000000	311.30914638	0.000000
2	-0.29016274	9.07584380	-2.63347170		2.00000000	17.17000000	155.83223805	0.061781
3	-0.28004920	9.06947800	-2.53990006		3.00000000	11.44666667	103.81529151	0.083281
4	-0.27022818	9.08097080	-2.45393421		4.00000000	8.58500000	77.96013432	0.104656
5	-0.26007298	9.06536960	-2.35765769		5.00000000	6.86800000	62.26095841	0.126146
6	-0.24991256	9.06438450	-2.26530354		6.00000000	5.72333333	51.87849396	0.147533
7	-0.24009822	9.07268620	-2.17833581		7.00000000	4.90571429	44.50800630	0.168908
8	-0.22995865	9.06847380	-2.08537399		8.00000000	4.29250000	38.92642379	0.190269
9	-0.22013687	9.06621550	-1.99580830		9.00000000	3.81555556	34.59264892	0.211748
10	-0.20998688	9.07476230	-1.90558102		10.00000000	3.43400000	31.16273374	0.233117
11	-0.20015989	9.07148460	-1.81574736		11.00000000	3.12181818	28.31952556	0.254509
12	-0.19000320	9.07787320	-1.72482496		12.00000000	2.86166667	25.97784714	0.275995
13	-0.18020895	9.07160280	-1.63478402		13.00000000	2.64153846	23.96298770	0.297412
14	-0.17004035	9.07600400	-1.54328690		14.00000000	2.45285714	22.26214124	0.318774
15	-0.16020741	9.07779120	-1.45432942		15.00000000	2.28933333	20.78208999	0.340151
16	-0.15008049	9.06342030	-1.36024256		16.00000000	2.14625000	19.45236582	0.361616
17	-0.13989924	9.07390790	-1.26943282		17.00000000	2.02000000	18.32929396	0.382987
18	-0.13008788	9.08034990	-1.18124347		18.00000000	1.90777778	17.32328975	0.404339
19	-0.11996840	9.05355830	-1.08614090		19.00000000	1.80736842	16.36311537	0.425720
20	-0.11012429	9.07765100	-0.99966987		20.00000000	1.71700000	15.58632677	0.447200
21	-0.09998249	9.05970670	-0.90581199		21.00000000	1.63523810	14.81477753	0.468575
22	-0.09014805	9.07220360	-0.81784150		22.00000000	1.56090909	14.16088507	0.489925
23	-0.08001741	9.06440450	-0.72531017		23.00000000	1.49304348	13.53355002	0.511301
24	-0.07019563	9.07330990	-0.63690670		24.00000000	1.43083333	12.98239425	0.532776
25	-0.06006201	9.06182770	-0.54427162		25.00000000	1.37360000	12.44732653	0.554154
26	-0.04989267	9.06324290	-0.45218937		26.00000000	1.32076923	11.97045235	0.575500
27	-0.04007759	9.06943320	-0.36348099		27.00000000	1.27185185	11.53497541	0.596865
28	-0.02991494	9.06529620	-0.27118781		28.00000000	1.22642857	11.11793827	0.618384
29	-0.02012591	9.07120230	-0.18256619		29.00000000	1.18413793	10.74155472	0.639758
30	-0.00995731	9.06372360	-0.09025030		30.00000000	1.14466667	10.37494228	0.661127
31	-0.00069967	9.06303980	-0.00634110		31.00000000	1.10774194	10.03950925	0.682629
32	0.00947245	9.06348040	0.08585333		32.00000000	1.07312500	9.72624740	0.704112
33	0.01924929	9.06933780	0.17457835		33.00000000	1.04060606	9.43760788	0.725507
34	0.02940198	9.06472020	0.26652068		34.00000000	1.01000000	9.15536740	0.746871
35	0.03923911	9.06987860	0.35589392		35.00000000	0.98114286	8.89884660	0.768233
36	0.04940593	9.07566360	0.44839156		36.00000000	0.95388889	8.65717467	0.789710
37	0.05921031	9.05750370	0.53629758		37.00000000	0.92810811	8.40634262	0.811086
38	0.06936522	9.08012100	0.62984457		38.00000000	0.90368421	8.20556198	0.832475
39	0.07950302	9.05407710	0.71982643		39.00000000	0.88051282	7.97223096	0.853845
40	0.08932898	9.06622410	0.80987657		40.00000000	0.85850000	7.78335339	0.875328
41	0.09947794	9.05992510	0.90126268		41.00000000	0.83756098	7.58823971	0.896687
42	0.10929572	9.06244180	0.99048610		42.00000000	0.81761905	7.40962503	0.918082
43	0.11944989	9.07641790	1.08417712		43.00000000	0.79860465	7.24846955	0.939569
44	0.12924907	9.07280640	1.17265179		44.00000000	0.78045455	7.08091299	0.960956
45	0.13940397	9.07318970	1.26483866		45.00000000	0.76311111	6.92385187	0.982313
46	0.14922176	9.05828000	1.35169248		46.00000000	0.74652174	6.76220294	1.003689
47	0.15939006	9.07254410	1.44607335		47.00000000	0.73063830	6.62874818	1.025171
48	0.16953382	9.05703450	1.53547366		48.00000000	0.71541667	6.47955343	1.046556
49	0.17935754	9.07088380	1.62693140		49.00000000	0.70081633	6.35702346	1.067901
50	0.18950725	9.06809810	1.71847033		50.00000000	0.68680000	6.22796978	1.089292
51	0.19929005	9.06351660	1.80626868		51.00000000	0.67333333	6.10276784	1.110787
52	0.20942561	9.06318000	1.89806200		52.00000000	0.66038462	5.98518464	1.132158
53	0.21923818	9.06882100	1.98823181		53.00000000	0.64792453	5.87591157	1.153532
54	0.22940947	9.06808470	2.08030450		54.00000000	0.63592593	5.76663016	1.174914
55	0.23924659	9.05696490	2.16684797		55.00000000	0.62436364	5.65483954	1.196390
56	0.24936505	9.07040980	2.26184319		56.00000000	0.61321429	5.56210487	1.217777
57	0.25954005	9.05865000	2.35108247		57.00000000	0.60245614	5.45743932	1.239120
58	0.26934963	9.06507210	2.44167382		58.00000000	0.59206897	5.36714786	1.260496
59	0.27948150	9.07172780	2.53538009		59.00000000	0.58203390	5.28005310	1.281975
60	0.28933647	9.05769920	2.62072271		60.00000000	0.57233333	5.18402318	1.303347
61	0.29946014	9.07501220	2.71760442		61.00000000	0.56295082	5.10878556	1.324716
62	0.30928683	9.06274410	2.80298739		62.00000000	0.55387097	5.01959085	1.346088
63	0.31941572	9.07145790	2.89756626		63.00000000	0.54507937	4.94466451	1.367581
64	0.32924986	9.06491370	2.98462157		64.00000000	0.53656250	4.86389276	1.388961
65	0.33938318	9.05524730	3.07319862		65.00000000	0.52830769	4.78395680	1.410365
66	0.34922552	9.07416150	3.16892877		66.00000000	0.52030303	4.72131373	1.431721
67	0.35933951	9.06674960	3.25804136		67.00000000	0.51253731	4.64704748	1.453188
68	0.36949441	9.06802270	3.35058370		68.00000000	0.50500000	4.57935146	1.474565
69	0.37932560	9.04194740	3.42984212		69.00000000	0.49768116	4.50000687	1.495942
70	0.38947603	9.07469840	3.53437751		70.00000000	0.49057143	4.45178776	1.517319
71	0.39927894	9.05182270	3.61420217		71.00000000	0.48366197	4.37802242	1.538790
72	0.40946436	9.06036570	3.70989684		72.00000000	0.47694444	4.32129109	1.560169
73	0.41927472	9.04898550	3.79401086		73.00000000	0.47041096	4.25674195	1.581556
74	0.42941028	9.05000500	3.88616518		74.00000000	0.46405405	4.19969151	1.603035
75	0.43921912	9.05506040	3.97715566		75.00000000	0.45786667	4.14601032	1.624419
76	0.44940975	9.04554560	4.06515639		76.00000000	0.45184211	4.08715837	1.645766
77	0.45952150	9.03961750	4.15389859		77.00000000	0.44597403	4.03143461	1.667140
78	0.46940106	9.02967930	4.23854103		78.00000000	0.44025641	3.97537419	1.688625
79	0.47953364	9.03037830	4.33037018		79.00000000	0.43468354	3.92535685	1.710001
80	0.48936331	9.01935860	4.41374318		80.00000000	0.42925000	3.87155968	1.731345
81	0.49946168	9.01138780	4.50084289		81.00000000	0.42395062	3.82038342	1.752727
82	0.50930846	8.98672100	4.57701303		82.00000000	0.41878049	3.76346340	1.774210
83	0.51945597	8.96439550	4.65660876		83.00000000	0.41373494	3.70888363	1.795576
84	0.52924323	8.92428300	4.72311636		84.00000000	0.40880952	3.64833188	1.816928
85	0.53937060	8.90381810	4.80245771		85.00000000	0.40400000	3.59714251	1.838306
86	0.54952699	8.81241610	4.84266049		86.00000000	0.39930233	3.51881824	1.859840
87	0.55934405	8.74304680	4.89037121		87.00000000	0.39471264	3.45099112	1.881219
88	0.56948036	8.61004160	4.90324959		88.00000000	0.39022727	3.35987305	1.902575
89	0.57929438	8.43132400	4.88421861		89.00000000	0.38584270	3.25316479	1.923949
90	0.58941060	8.19951150	4.83287899		90.00000000	0.38155556	3.12856917	1.945430
91	0.59920532	7.86278390	4.71142194		91.00000000	0.37736264	2.96712087	1.966806
92	0.60933268	7.40612940	4.51279668		92.00000000	0.37326087	2.76441830	1.988282
93	0.61910951	6.83173040	4.22958926		93.00000000	0.36924731	2.52259809	2.009687
94	0.62925851	6.00829410	3.78077019		94.00000000	0.36531915	2.19494489	2.031175
95	0.63936579	4.99269960	3.19216132		95.00000000	0.36147368	1.80472952	2.052564
96	0.64913666	3.72219710	2.41621459		96.00000000	0.35770833	1.33146092	2.074030
97	0.65924919	2.10262350	1.38615284		97.00000000	0.35402062	0.74437207	2.095405
98	0.66898656	0.19407801	0.12983558		98.00000000	0.35040816	0.06800652	2.116886
99	0.67907971	-2.15364980	-1.46249988		99.00000000	0.34686869	-0.74703368	2.138267
100	0.68877769	-4.81134410	-3.31394647		100.00000000	0.34340000	-1.65221556	2.159645
101	0.69901294	-8.03433610	-5.61610490		101.00000000	0.34000000	-2.73167427	2.180998
08:55 04/04/2018
Test Lot:	JK-PERC
Recipe:	Recipe_YJX-LID
Cell Name:	3-18-12h
Test Order:	3
Test Condition:	Light
1	-0.29996294	9.06735130	-2.71986935		1.00000000	34.34000000	311.37284364	0.000000
2	-0.29015583	9.06391810	-2.62994868		2.00000000	17.17000000	155.62747378	0.061764
3	-0.28002122	9.07018660	-2.53984472		3.00000000	11.44666667	103.82340261	0.083174
4	-0.27019775	9.08200450	-2.45393718		4.00000000	8.58500000	77.96900863	0.104661
5	-0.26003116	9.06889530	-2.35819536		5.00000000	6.86800000	62.28517292	0.126047
6	-0.24988317	9.05594640	-2.26292859		6.00000000	5.72333333	51.83019990	0.147391
7	-0.24003512	9.07358840	-2.17797988		7.00000000	4.90571429	44.51243224	0.168760
8	-0.22993031	9.06670190	-2.08470958		8.00000000	4.29250000	38.91881791	0.190244
9	-0.22009119	9.06283190	-1.99464946		9.00000000	3.81555556	34.57973861	0.211668
10	-0.20994768	9.07547190	-1.90537427		10.00000000	3.43400000	31.16517050	0.233017
11	-0.20010632	9.07089420	-1.81514326		11.00000000	3.12181818	28.31768244	0.254410
12	-0.18999556	9.06479260	-1.72227035		12.00000000	2.86166667	25.94041482	0.275890
13	-0.18022566	9.05733300	-1.63236382		13.00000000	2.64153846	23.92529348	0.297282
14	-0.17005906	9.07555870	-1.54338098		14.00000000	2.45285714	22.26104898	0.318639
15	-0.16025195	9.07836250	-1.45482529		15.00000000	2.28933333	20.78339788	0.340012
16	-0.15006973	9.04827210	-1.35787175		16.00000000	2.14625000	19.41985399	0.361493
17	-0.13995449	9.07448960	-1.27001556		17.00000000	2.02000000	18.33046899	0.382861
18	-0.13011463	9.05606270	-1.17832625		18.00000000	1.90777778	17.27695517	0.404195
19	-0.11998972	9.07063580	-1.08838305		19.00000000	1.80736842	16.39398070	0.425568
20	-0.11017218	9.05638500	-0.99776168		20.00000000	1.71700000	15.54981305	0.447046
21	-0.10000559	9.06287380	-0.90633804		21.00000000	1.63523810	14.81995649	0.468422
22	-0.09018583	9.07353310	-0.81830410		22.00000000	1.56090909	14.16296030	0.489805
23	-0.08005124	9.06522180	-0.72568221		23.00000000	1.49304348	13.53477029	0.511152
24	-0.07020170	9.07036400	-0.63675499		24.00000000	1.43083333	12.97817916	0.532617
25	-0.06007753	9.07327460	-0.54509995		25.00000000	1.37360000	12.46304999	0.554001
26	-0.04992136	9.06828780	-0.45270130		26.00000000	1.32076923	11.97711550	0.575387
27	-0.04011871	9.06318760	-0.36360342		27.00000000	1.27185185	11.52703193	0.596778
28	-0.02991119	9.05566410	-0.27086567		28.00000000	1.22642857	11.10612519	0.618239
29	-0.02012417	9.07653710	-0.18265778		29.00000000	1.18413793	10.74787186	0.639594
30	-0.00996279	9.06050210	-0.09026787		30.00000000	1.14466667	10.37125474	0.660980
31	-0.00065284	9.05832100	-0.00591365		31.00000000	1.10774194	10.03428204	0.682571
32	0.00949419	9.07601930	0.08616946		32.00000000	1.07312500	9.73970321	0.703958
33	0.01927126	9.05874160	0.17457332		33.00000000	1.04060606	9.42658141	0.725313
34	0.02944723	9.07201100	0.26714560		34.00000000	1.01000000	9.16273111	0.746687
35	0.03923174	9.05711750	0.35532648		35.00000000	0.98114286	8.88632614	0.768169
36	0.04941367	9.06433200	0.44790191		36.00000000	0.95388889	8.64636558	0.789563
37	0.05924953	9.06803700	0.53727691		37.00000000	0.92810811	8.41611866	0.810908
38	0.06936001	9.06238270	0.62856695		38.00000000	0.90368421	8.18953216	0.832290
39	0.07952036	9.06707290	0.72101690		39.00000000	0.88051282	7.98367393	0.853764
40	0.08932347	9.06465440	0.80968638		40.00000000	0.85850000	7.78200580	0.875134
41	0.09950094	9.06698230	0.90217325		41.00000000	0.83756098	7.59415054	0.896473
42	0.10932414	9.05833630	0.99029483		42.00000000	0.81761905	7.40626830	0.917852
43	0.11946440	9.06739330	1.08323070		43.00000000	0.79860465	7.24126246	0.939337
44	0.12930472	9.06289390	1.17187496		44.00000000	0.78045455	7.07317674	0.960714
45	0.13942786	9.06744290	1.26425416		45.00000000	0.76311111	6.91946643	0.982070
46	0.14922874	9.05570410	1.35137131		46.00000000	0.74652174	6.76027997	1.003444
47	0.15940247	9.06916050	1.44564658		47.00000000	0.73063830	6.62627599	1.024909
48	0.16955464	9.07098770	1.53802805		48.00000000	0.71541667	6.48953578	1.046295
49	0.17934510	9.06469630	1.62570886		49.00000000	0.70081633	6.35268716	1.067638
50	0.18950619	9.06757350	1.71836131		50.00000000	0.68680000	6.22760948	1.089017
51	0.19929293	9.05604930	1.80480660		51.00000000	0.67333333	6.09773986	1.110495
52	0.20944583	9.07965760	1.90169642		52.00000000	0.66038462	5.99606619	1.131870
53	0.21921249	9.05930230	1.98591221		53.00000000	0.64792453	5.86974417	1.153272
54	0.22936985	9.06694600	2.07968404		54.00000000	0.63592593	5.76590603	1.174626
55	0.23922133	9.06694890	2.16900757		55.00000000	0.62436364	5.66107319	1.196096
56	0.24936830	9.06039050	2.25937418		56.00000000	0.61321429	5.55596089	1.217481
57	0.25952715	9.05898000	2.35105126		57.00000000	0.60245614	5.45763813	1.238859
58	0.26933548	9.07494640	2.44420504		58.00000000	0.59206897	5.37299413	1.260242
59	0.27946159	9.06613450	2.53363636		59.00000000	0.58203390	5.27679761	1.281715
60	0.28931531	9.07486820	2.62549831		60.00000000	0.57233333	5.19384957	1.303080
61	0.29948458	9.05433560	2.71163389		61.00000000	0.56295082	5.09714565	1.324465
62	0.30929515	9.06867980	2.80489868		62.00000000	0.55387097	5.02287846	1.345939
63	0.31944880	9.05704400	2.89326184		63.00000000	0.54507937	4.93680779	1.367313
64	0.32926530	9.06745150	2.98559714		64.00000000	0.53656250	4.86525445	1.388668
65	0.33941597	9.06106470	3.07547006		65.00000000	0.52830769	4.78703018	1.410047
66	0.34922206	9.04883290	3.16005207		66.00000000	0.52030303	4.70813518	1.431517
67	0.35935709	9.05520530	3.25405223		67.00000000	0.51253731	4.64113060	1.452909
68	0.36954051	9.05662060	3.34678820		68.00000000	0.50500000	4.57359340	1.474259
69	0.37932429	9.06255340	3.43764663		69.00000000	0.49768116	4.51026208	1.495633
70	0.38949579	9.05453110	3.52670174		70.00000000	0.49057143	4.44189426	1.517108
71	0.39934579	9.05634500	3.61661325		71.00000000	0.48366197	4.38020968	1.538488
72	0.40949273	9.05835630	3.70933105		72.00000000	0.47694444	4.32033271	1.559834
73	0.41924450	9.05253980	3.79522752		73.00000000	0.47041096	4.25841393	1.581214
74	0.42944428	9.05181030	3.88724816		74.00000000	0.46405405	4.20052927	1.602693
75	0.43925709	9.04589270	3.97347250		75.00000000	0.45786667	4.14181274	1.624080
76	0.44939658	9.05233290	4.06808745		76.00000000	0.45184211	4.09022516	1.645431
77	0.45954576	9.03680040	4.15282331		77.00000000	0.44597403	4.03017826	1.666808
78	0.46939653	9.02958200	4.23845446		78.00000000	0.44025641	3.97533136	1.688284
79	0.47955537	9.04382800	4.33701628		79.00000000	0.43468354	3.93120321	1.709667
80	0.48934287	9.01966380	4.41370817		80.00000000	0.42925000	3.87169069	1.731010
81	0.49947345	9.01144120	4.50097563		81.00000000	0.42395062	3.82040606	1.752392
82	0.50931454	8.98995400	4.57871429		82.00000000	0.41878049	3.76481732	1.773866
83	0.51944584	8.97923180	4.66422460		83.00000000	0.41373494	3.71502193	1.795237
84	0.52922958	8.93912410	4.73084889		84.00000000	0.40880952	3.65439907	1.816605
85	0.53933489	8.88208960	4.79042082		85.00000000	0.40400000	3.58836420	1.837963
86	0.54951012	8.83911230	4.85718166		86.00000000	0.39930233	3.52947810	1.859443
87	0.55935711	8.75432300	4.89679281		87.00000000	0.39471264	3.45544197	1.880828
88	0.56946313	8.61280350	4.90467404		88.00000000	0.39022727	3.36095082	1.902203
89	0.57924318	8.45337100	4.89655750		89.00000000	0.38584270	3.26167146	1.923569
90	0.58939981	8.18331720	4.82324560		90.00000000	0.38155556	3.12239014	1.945056
91	0.59920961	7.88225560	4.72312330		91.00000000	0.37736264	2.97446876	1.966428
92	0.60935211	7.42063380	4.52177886		92.00000000	0.37326087	2.76983222	1.987903
93	0.61913216	6.83058120	4.22903249		93.00000000	0.36924731	2.52217375	2.009413
94	0.62926865	6.03719810	3.79901950		94.00000000	0.36531915	2.20550407	2.030802
95	0.63938361	5.00411840	3.19955129		95.00000000	0.36147368	1.80885711	2.052161
96	0.64914954	3.73618440	2.42534238		96.00000000	0.35770833	1.33646429	2.073541
97	0.65926152	2.10289620	1.38635855		97.00000000	0.35402062	0.74446861	2.095009
98	0.66900659	0.19581772	0.13100335		98.00000000	0.35040816	0.06861613	2.116396
99	0.67910290	-2.16776440	-1.47213509		99.00000000	0.34686869	-0.75192959	2.137735
100	0.68881297	-4.85775470	-3.34608444		100.00000000	0.34340000	-1.66815296	2.159108
101	0.69898450	-8.11102960	-5.66948397		101.00000000	0.34000000	-2.75775006	2.180598
08:55 04/04/2018
Test Lot:	JK-PERC
Recipe:	Recipe_YJX-LID
Cell Name:	3-18-12h
Test Order:	4
Test Condition:	Light
1	-0.29994351	9.06137850	-2.71790167		1.00000000	34.34000000	311.16773769	0.000000
2	-0.29017222	9.08003330	-2.63477342		2.00000000	17.17000000	155.90417176	0.061791
3	-0.28001842	9.06530380	-2.53845205		3.00000000	11.44666667	103.76751083	0.083213
4	-0.27021143	9.07567790	-2.45235190		4.00000000	8.58500000	77.91469477	0.104565
5	-0.26005241	9.05121140	-2.35378934		5.00000000	6.86800000	62.16371990	0.126047
6	-0.24986064	9.07288360	-2.26695650		6.00000000	5.72333333	51.92713714	0.147442
7	-0.24006929	9.07449440	-2.17850743		7.00000000	4.90571429	44.51687681	0.168868
8	-0.22992143	9.07279400	-2.08602977		8.00000000	4.29250000	38.94496825	0.190276
9	-0.22007871	9.06414510	-1.99482536		9.00000000	3.81555556	34.58474919	0.211748
10	-0.20994574	9.06913380	-1.90402601		10.00000000	3.43400000	31.14340547	0.233114
11	-0.20012386	9.06822780	-1.81476875		11.00000000	3.12181818	28.30935842	0.254522
12	-0.18997079	9.06549360	-1.72217898		12.00000000	2.86166667	25.94242085	0.275875
13	-0.18020846	9.07992170	-1.63627871		13.00000000	2.64153846	23.98496240	0.297365
14	-0.17002340	9.05558870	-1.53966198		14.00000000	2.45285714	22.21206543	0.318748
15	-0.16022757	9.06748490	-1.45286107		15.00000000	2.28933333	20.75849543	0.340101
16	-0.15005292	9.07550720	-1.36180636		16.00000000	2.14625000	19.47830733	0.361465
17	-0.13990805	9.05704400	-1.26715336		17.00000000	2.02000000	18.29522888	0.382929
18	-0.13007277	9.07037730	-1.17980910		18.00000000	1.90777778	17.30426425	0.404307
19	-0.11991151	9.06156160	-1.08658553		19.00000000	1.80736842	16.37758028	0.425694
20	-0.11014918	9.05578230	-0.99748699		20.00000000	1.71700000	15.54877821	0.447049
21	-0.09993807	9.06591420	-0.90602992		21.00000000	1.63523810	14.82492827	0.468522
22	-0.09016158	9.05852600	-0.81673105		22.00000000	1.56090909	14.13953558	0.489896
23	-0.07999215	9.07506850	-0.72593420		23.00000000	1.49304348	13.54947184	0.511282
24	-0.07016879	9.07184410	-0.63656029		24.00000000	1.43083333	12.98029693	0.532750
25	-0.06000902	9.06081580	-0.54373069		25.00000000	1.37360000	12.44593658	0.554137
26	-0.04991103	9.05489440	-0.45193911		26.00000000	1.32076923	11.95942591	0.575482
27	-0.04006460	9.07264040	-0.36349167		27.00000000	1.27185185	11.53905449	0.596846
28	-0.02994279	9.06968310	-0.27157158		28.00000000	1.22642857	11.12331849	0.618328
29	-0.02011273	9.07331470	-0.18248908		29.00000000	1.18413793	10.74405610	0.639696
30	-0.00994998	9.05245590	-0.09007178		30.00000000	1.14466667	10.36204452	0.661041
31	-0.00064387	9.07894710	-0.00584570		31.00000000	1.10774194	10.05713043	0.682548
32	0.00948814	9.06867500	0.08604490		32.00000000	1.07312500	9.73182186	0.704016
33	0.01931421	9.07220650	0.17522246		33.00000000	1.04060606	9.44059307	0.725389
34	0.02942903	9.07373810	0.26703127		34.00000000	1.01000000	9.16447548	0.746754
35	0.03927071	9.06317900	0.35591751		35.00000000	0.98114286	8.89227334	0.768128
36	0.04940786	9.06068040	0.44766885		36.00000000	0.95388889	8.64288236	0.789599
37	0.05921606	9.04860400	0.53582270		37.00000000	0.92810811	8.39808274	0.810978
38	0.06938819	9.05796530	0.62851580		38.00000000	0.90368421	8.18554022	0.832319
39	0.07952385	9.07347110	0.72155733		39.00000000	0.88051282	7.98930763	0.853698
40	0.08935512	9.06454280	0.80996330		40.00000000	0.85850000	7.78190999	0.875198
41	0.09948557	9.06340600	0.90167810		41.00000000	0.83756098	7.59115517	0.896574
42	0.10928261	9.06651880	0.99081284		42.00000000	0.81761905	7.41295847	0.917935
43	0.11945994	9.06375500	1.08275563		43.00000000	0.79860465	7.23835690	0.939307
44	0.12926069	9.06169030	1.17132034		44.00000000	0.78045455	7.07223738	0.960788
45	0.13941571	9.08119200	1.26606083		45.00000000	0.76311111	6.92995852	0.982163
46	0.14927377	9.06037040	1.35247565		46.00000000	0.74652174	6.76376347	1.003527
47	0.15936925	9.06116770	1.44407150		47.00000000	0.73063830	6.62043615	1.024881
48	0.16951086	9.07142160	1.53770448		48.00000000	0.71541667	6.48984620	1.046356
49	0.17934808	9.06058880	1.62499920		49.00000000	0.70081633	6.34980856	1.067720
50	0.18952467	9.05947880	1.71699473		50.00000000	0.68680000	6.22205004	1.089095
51	0.19931129	9.06723310	1.80720193		51.00000000	0.67333333	6.10527029	1.110449
52	0.20947745	9.06908890	1.89976962		52.00000000	0.66038462	5.98908679	1.131926
53	0.21926184	9.05748650	1.98596116		53.00000000	0.64792453	5.86856767	1.153316
54	0.22943546	9.05618760	2.07781057		54.00000000	0.63592593	5.75906448	1.174701
55	0.23923919	9.06799700	2.16942026		55.00000000	0.62436364	5.66172758	1.196179
56	0.24940015	9.05620960	2.25862003		56.00000000	0.61321429	5.55339710	1.217564
57	0.25953284	9.06578450	2.35286880		57.00000000	0.60245614	5.46173754	1.238910
58	0.26936039	9.07083800	2.44332446		58.00000000	0.59206897	5.37056167	1.260285
59	0.27950722	9.05488300	2.53090517		59.00000000	0.58203390	5.27024885	1.281767
60	0.28932360	9.08366010	2.62811724		60.00000000	0.57233333	5.19888146	1.303138
61	0.29948530	9.05357460	2.71141251		61.00000000	0.56295082	5.09671724	1.324473
62	0.30932325	9.06266500	2.80329299		62.00000000	0.55387097	5.01954703	1.345858
63	0.31945595	9.06905360	2.89716313		63.00000000	0.54507937	4.94335398	1.367335
64	0.32925671	9.05414490	2.98113796		64.00000000	0.53656250	4.85811462	1.388712
65	0.33941171	9.06219100	3.07581374		65.00000000	0.52830769	4.78762521	1.410080
66	0.34925416	9.06136320	3.16471879		66.00000000	0.52030303	4.71465473	1.431460
67	0.35936972	9.04635620	3.25098649		67.00000000	0.51253731	4.63659510	1.452933
68	0.36952993	9.06727980	3.35063127		68.00000000	0.50500000	4.57897630	1.474311
69	0.37934557	9.05832100	3.43623394		69.00000000	0.49768116	4.50815570	1.495671
70	0.38950506	9.06085110	3.52924735		70.00000000	0.49057143	4.44499467	1.517051
71	0.39933109	9.04253290	3.61096452		71.00000000	0.48366197	4.37352929	1.538523
72	0.40943775	9.05349730	3.70684356		72.00000000	0.47694444	4.31801524	1.559894
73	0.41930547	9.04373930	3.79208936		73.00000000	0.47041096	4.25427408	1.581252
74	0.42942476	9.05305670	3.88760670		74.00000000	0.46405405	4.20110766	1.602623
75	0.43925530	9.04506110	3.97309103		75.00000000	0.45786667	4.14143198	1.624103
76	0.44939020	9.03137300	4.05861052		76.00000000	0.45184211	4.08075459	1.645485
77	0.45952883	9.04976750	4.15862907		77.00000000	0.44597403	4.03596125	1.666842
78	0.46939734	9.03540800	4.24119648		78.00000000	0.44025641	3.97789629	1.688198
79	0.47954935	9.02842520	4.32957544		79.00000000	0.43468354	3.92450787	1.709690
80	0.48933747	9.01670650	4.41221235		80.00000000	0.42925000	3.87042127	1.731063
81	0.49949023	9.00542260	4.49812061		81.00000000	0.42395062	3.81785447	1.752454
82	0.50932002	8.98237130	4.57490153		82.00000000	0.41878049	3.76164183	1.773799
83	0.51943409	8.97620680	4.66254781		83.00000000	0.41373494	3.71377038	1.795270
84	0.52924454	8.92040630	4.72107633		84.00000000	0.40880952	3.64674705	1.816661
85	0.53937721	8.88847160	4.79423901		85.00000000	0.40400000	3.59094253	1.838043
86	0.54951882	8.81326100	4.84305279		86.00000000	0.39930233	3.51915561	1.859524
87	0.55936348	8.73917100	4.88837310		87.00000000	0.39471264	3.44946129	1.880915
88	0.56947011	8.60952090	4.90286481		88.00000000	0.39022727	3.35966986	1.902270
89	0.57931179	8.43474010	4.88634439		89.00000000	0.38584270	3.25448287	1.923641
90	0.58941996	8.19200330	4.82853026		90.00000000	0.38155556	3.12570437	1.945121
91	0.59924453	7.86305480	4.71189258		91.00000000	0.37736264	2.96722310	1.966494
92	0.60936302	7.41021590	4.51551154		92.00000000	0.37326087	2.76594363	1.987958
93	0.61916381	6.80776600	4.21512233		93.00000000	0.36924731	2.51374930	2.009374
94	0.62928456	6.01200200	3.78326003		94.00000000	0.36531915	2.19629945	2.030869
95	0.63939196	4.97510910	3.18104476		95.00000000	0.36147368	1.79837102	2.052254
96	0.64915776	3.71474740	2.41145710		96.00000000	0.35770833	1.32879610	2.073609
97	0.65928221	2.08419010	1.37406946		97.00000000	0.35402062	0.73784627	2.094973
98	0.66899365	0.17551847	0.11742074		98.00000000	0.35040816	0.06150310	2.116436
99	0.67910033	-2.17169710	-1.47480022		99.00000000	0.34686869	-0.75329372	2.137814
100	0.68878645	-4.83998110	-3.33371340		100.00000000	0.34340000	-1.66204951	2.159213
101	0.69903225	-8.06099130	-5.63489289		101.00000000	0.34000000	-2.74073704	2.180607
